# Supplementary material for: Frameshift mutations at the C-terminus of HIST1H1E result in a specific DNA hypomethylation signature
Source: PubMed Central journal article supplement (PMC6947958; doi:10.1186/s13148-019-0804-0), 2020-01-07

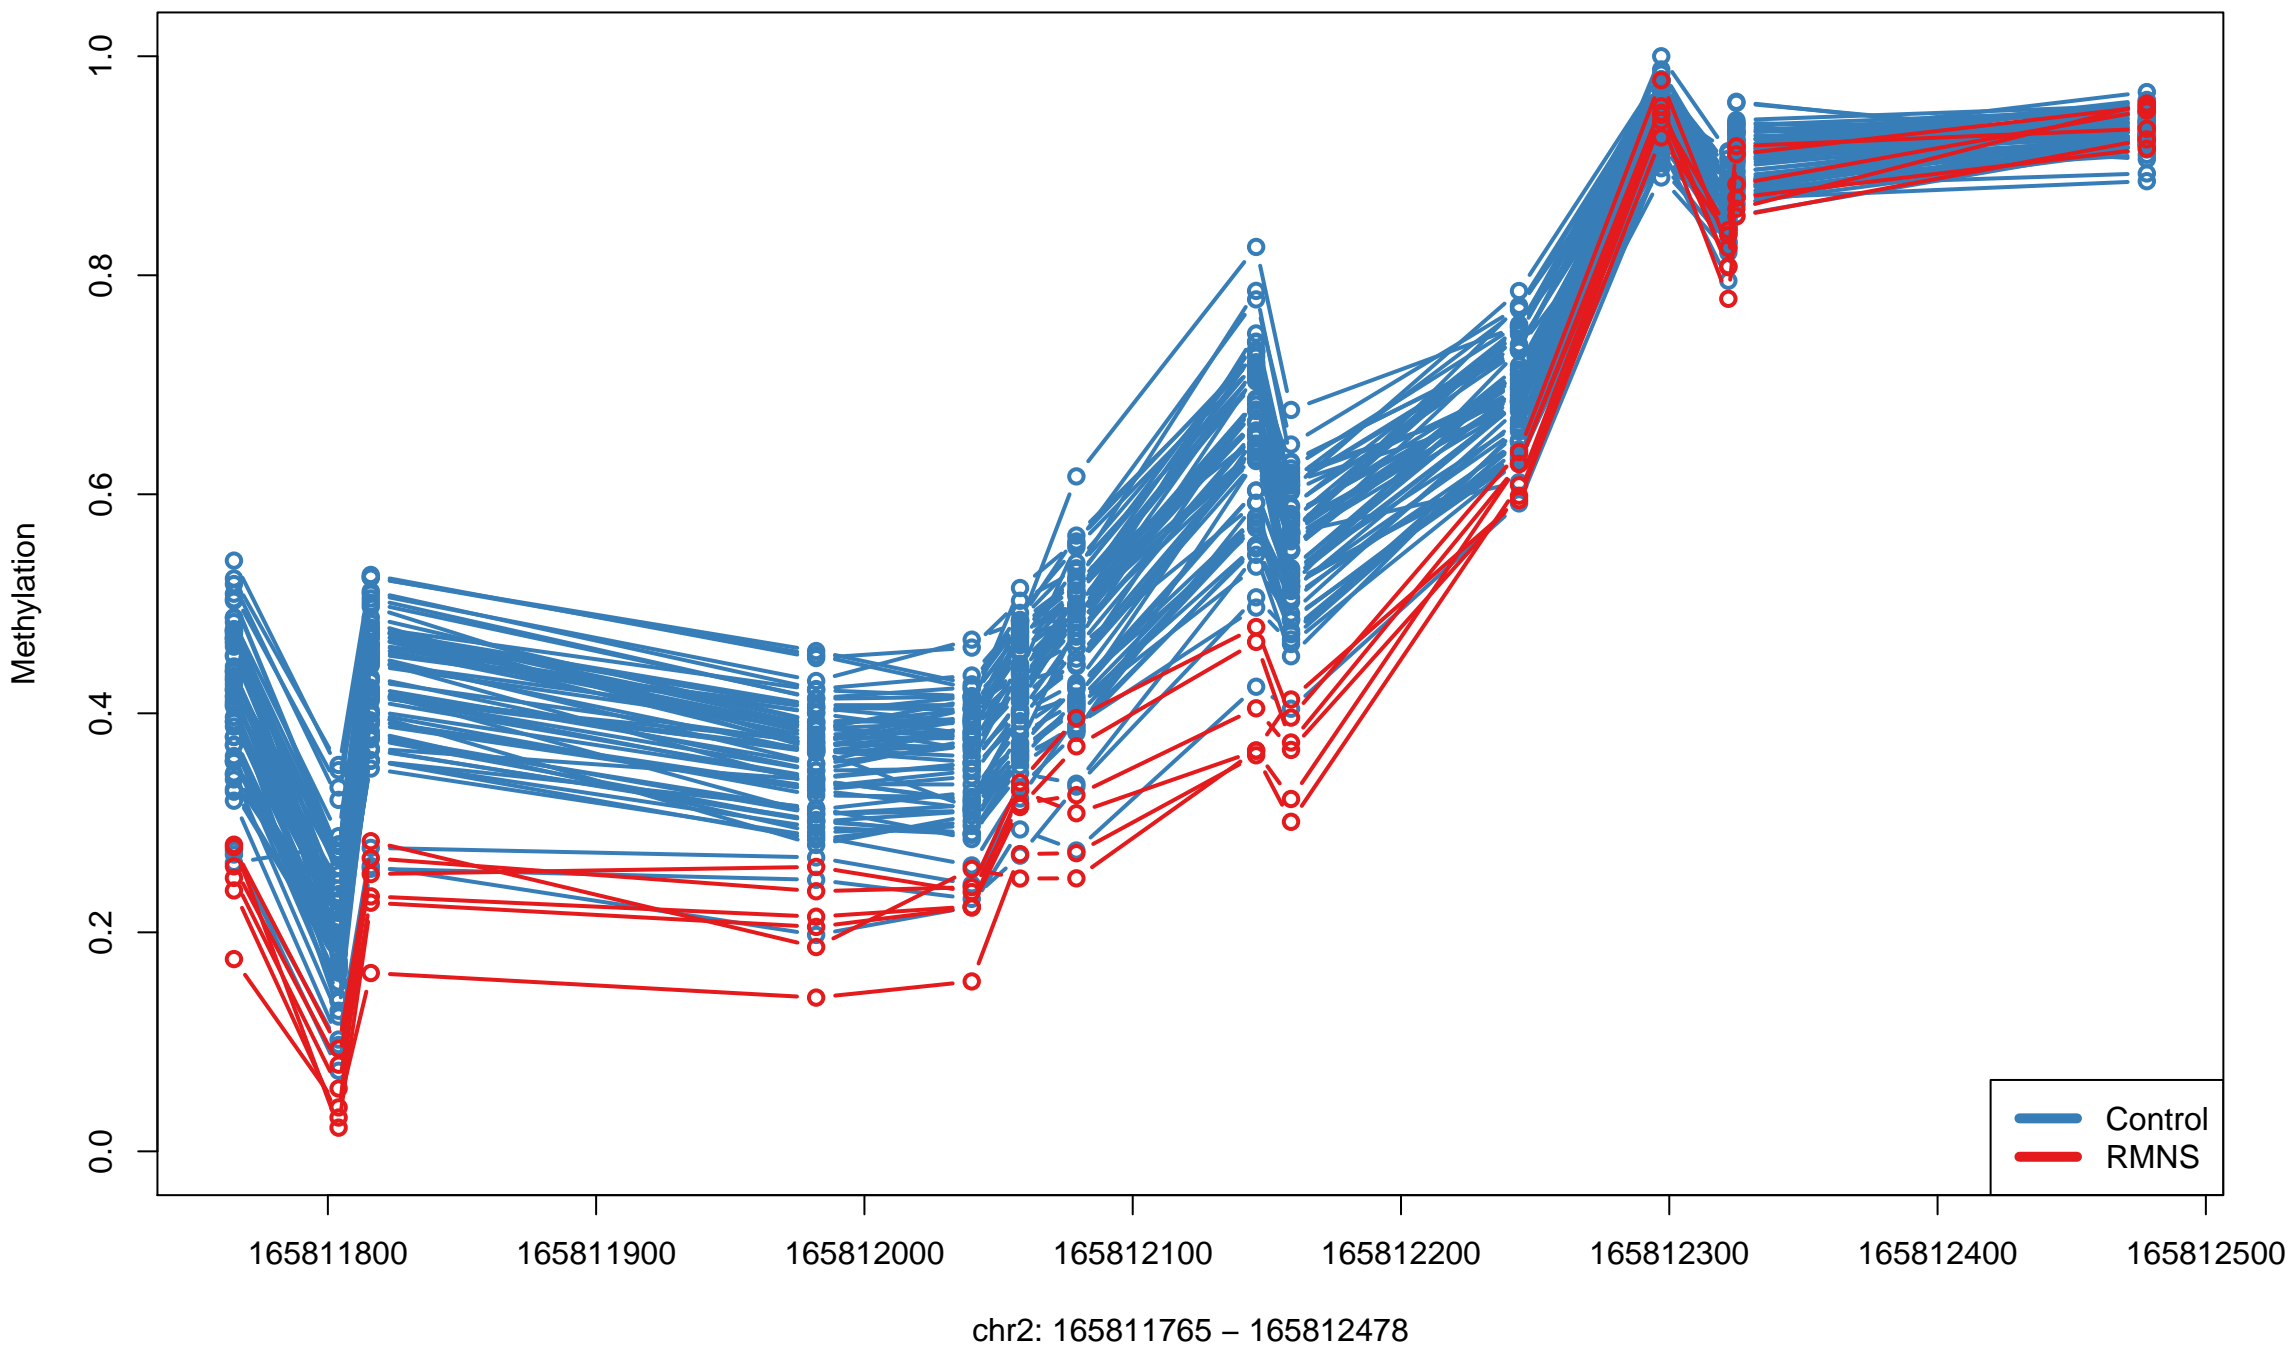

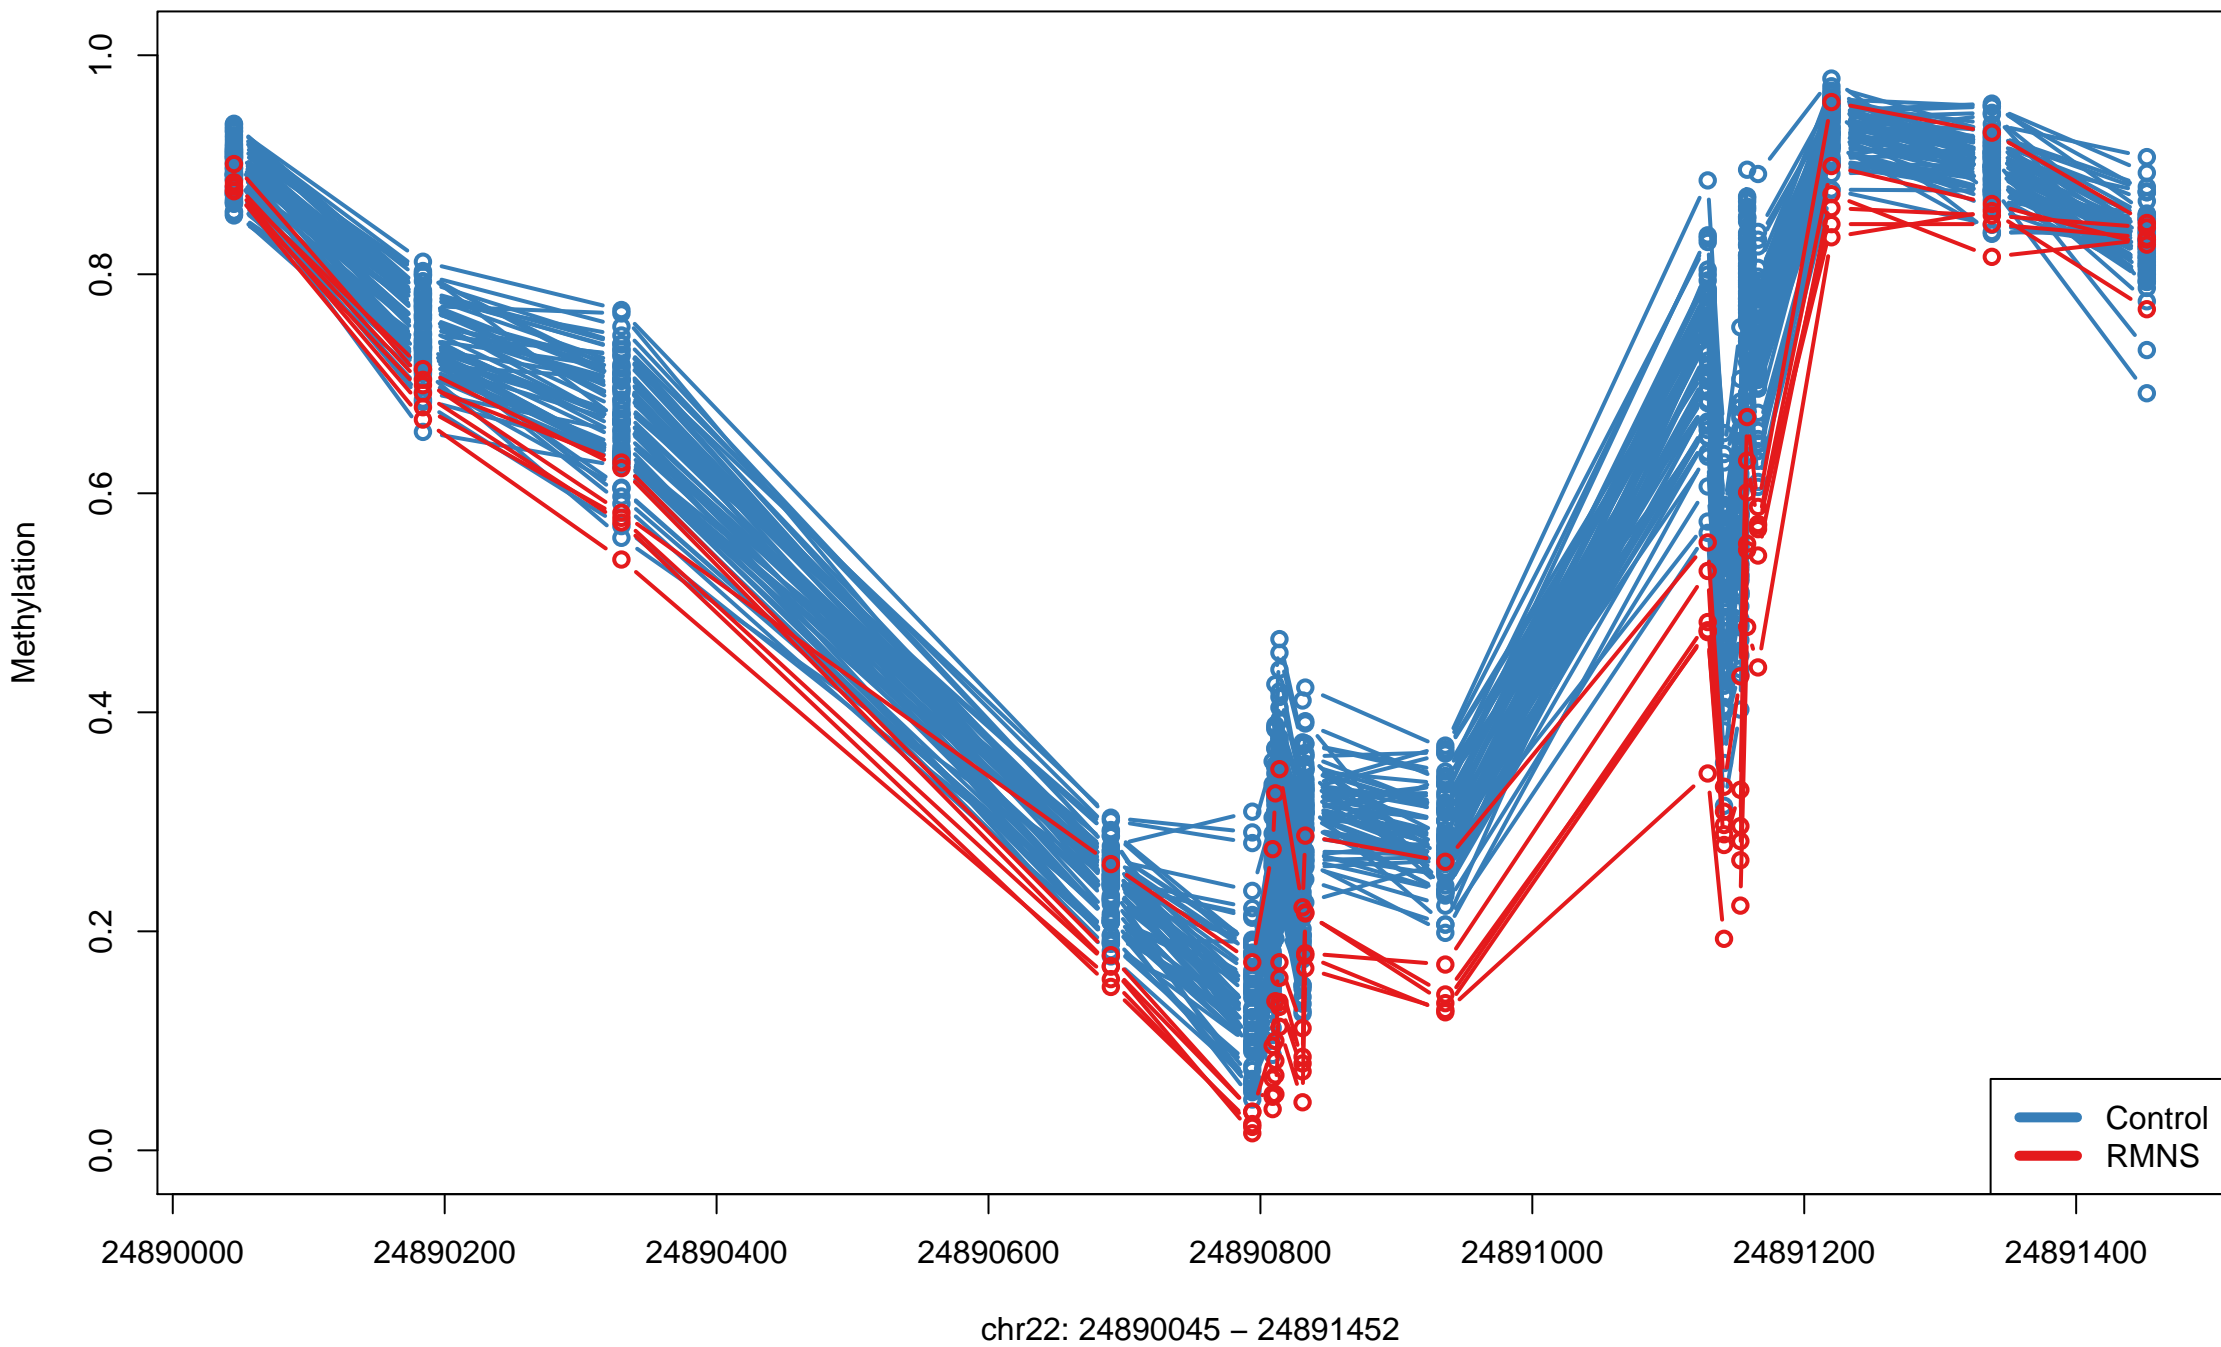

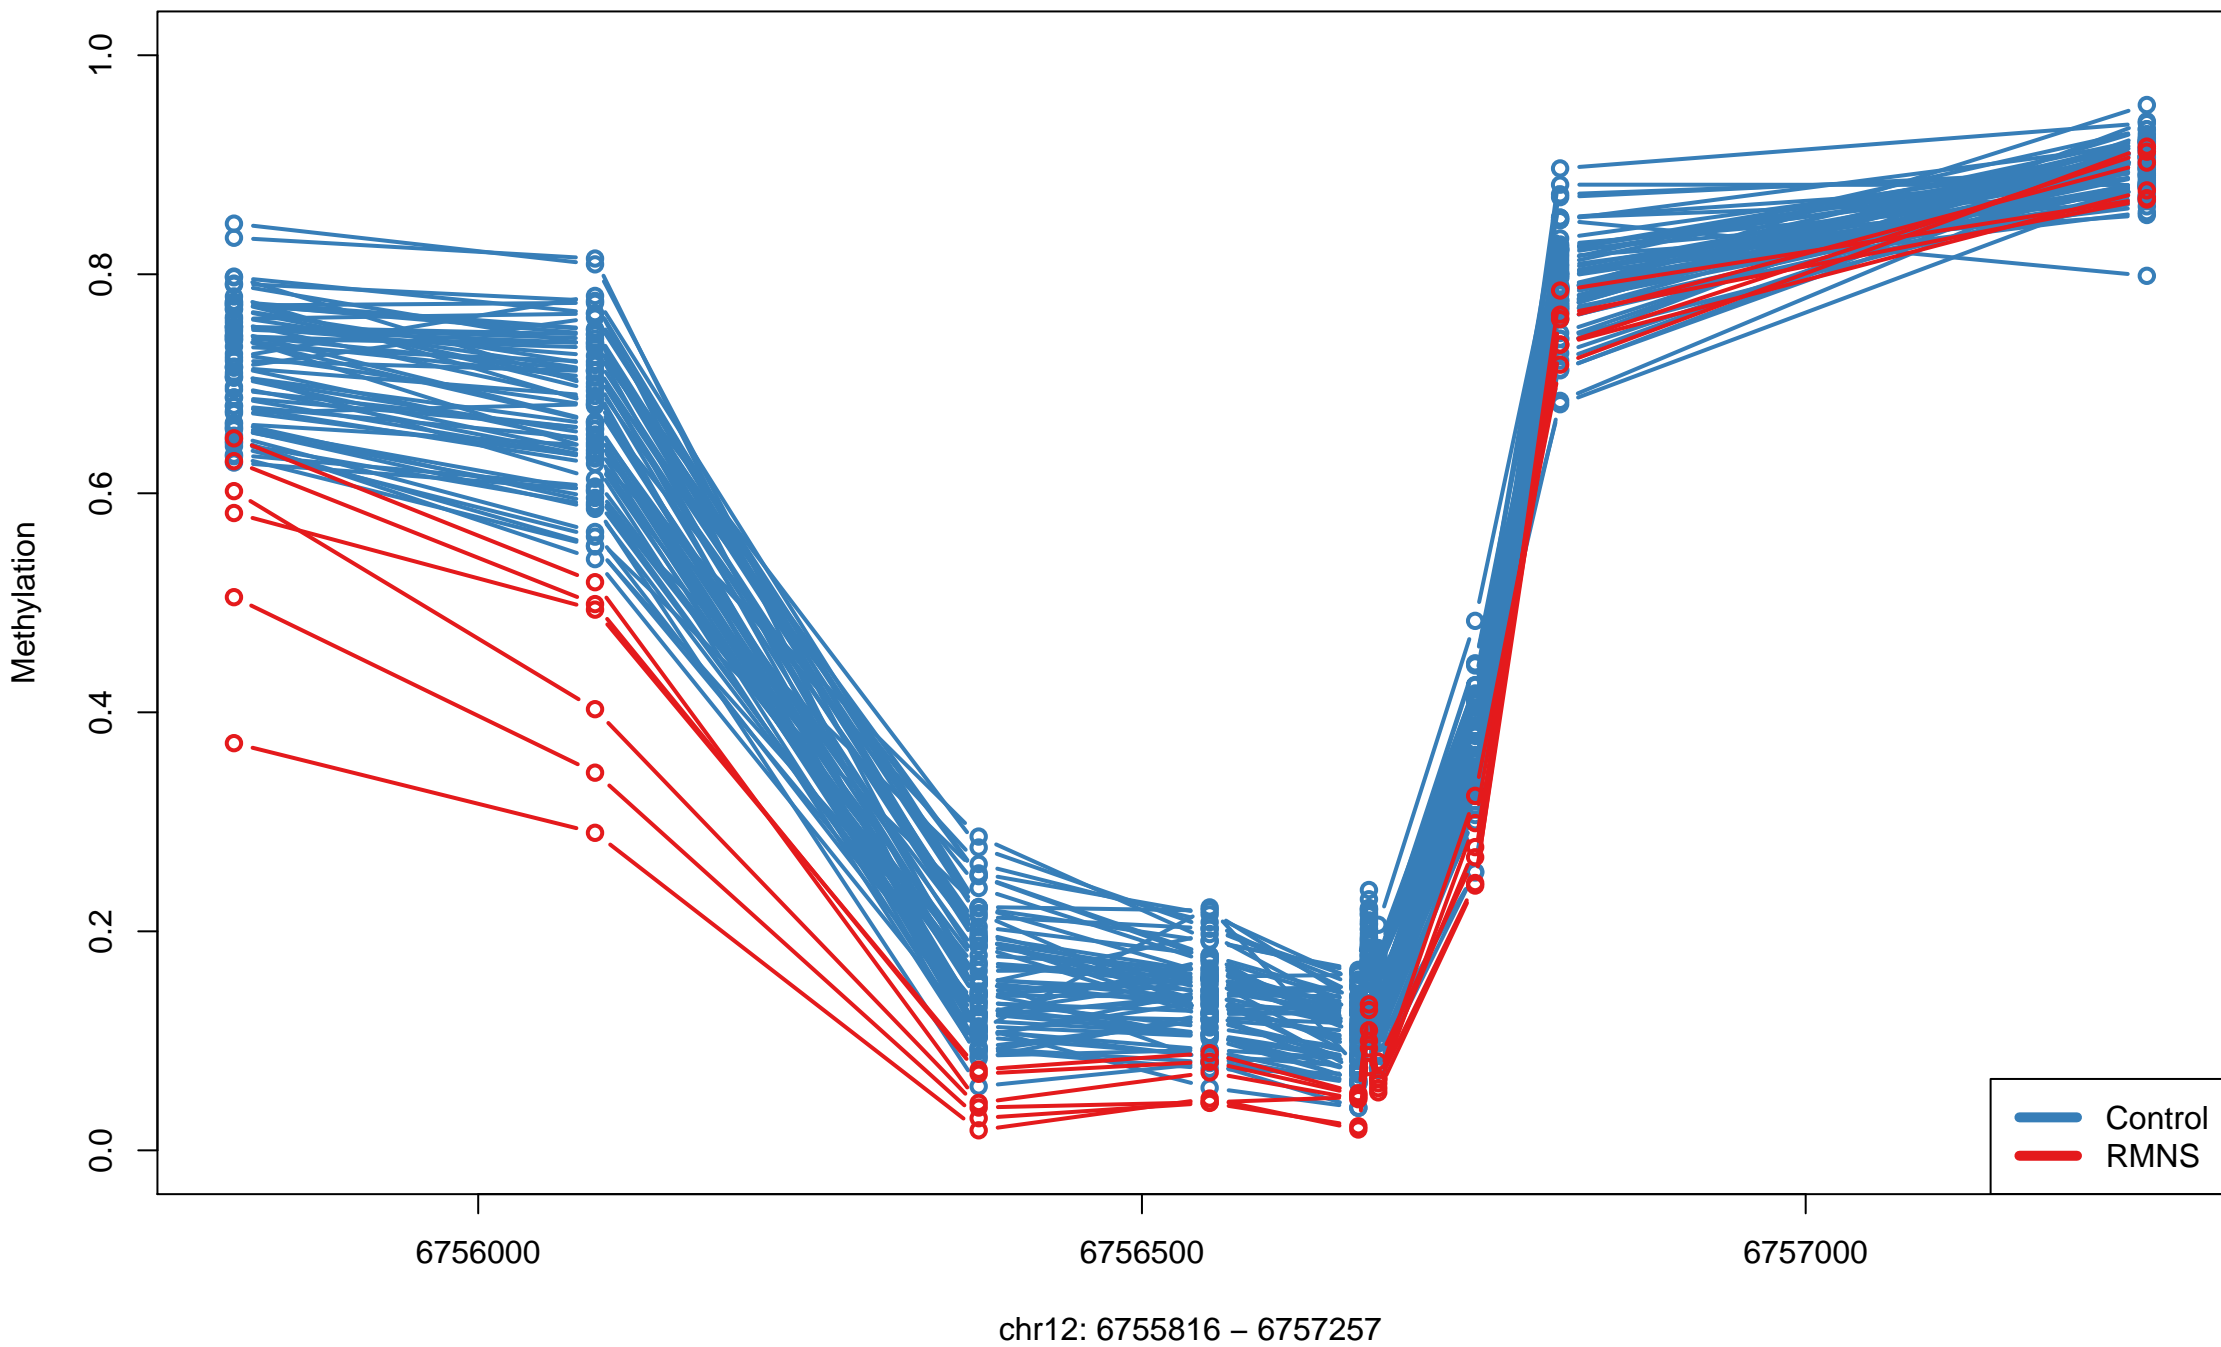

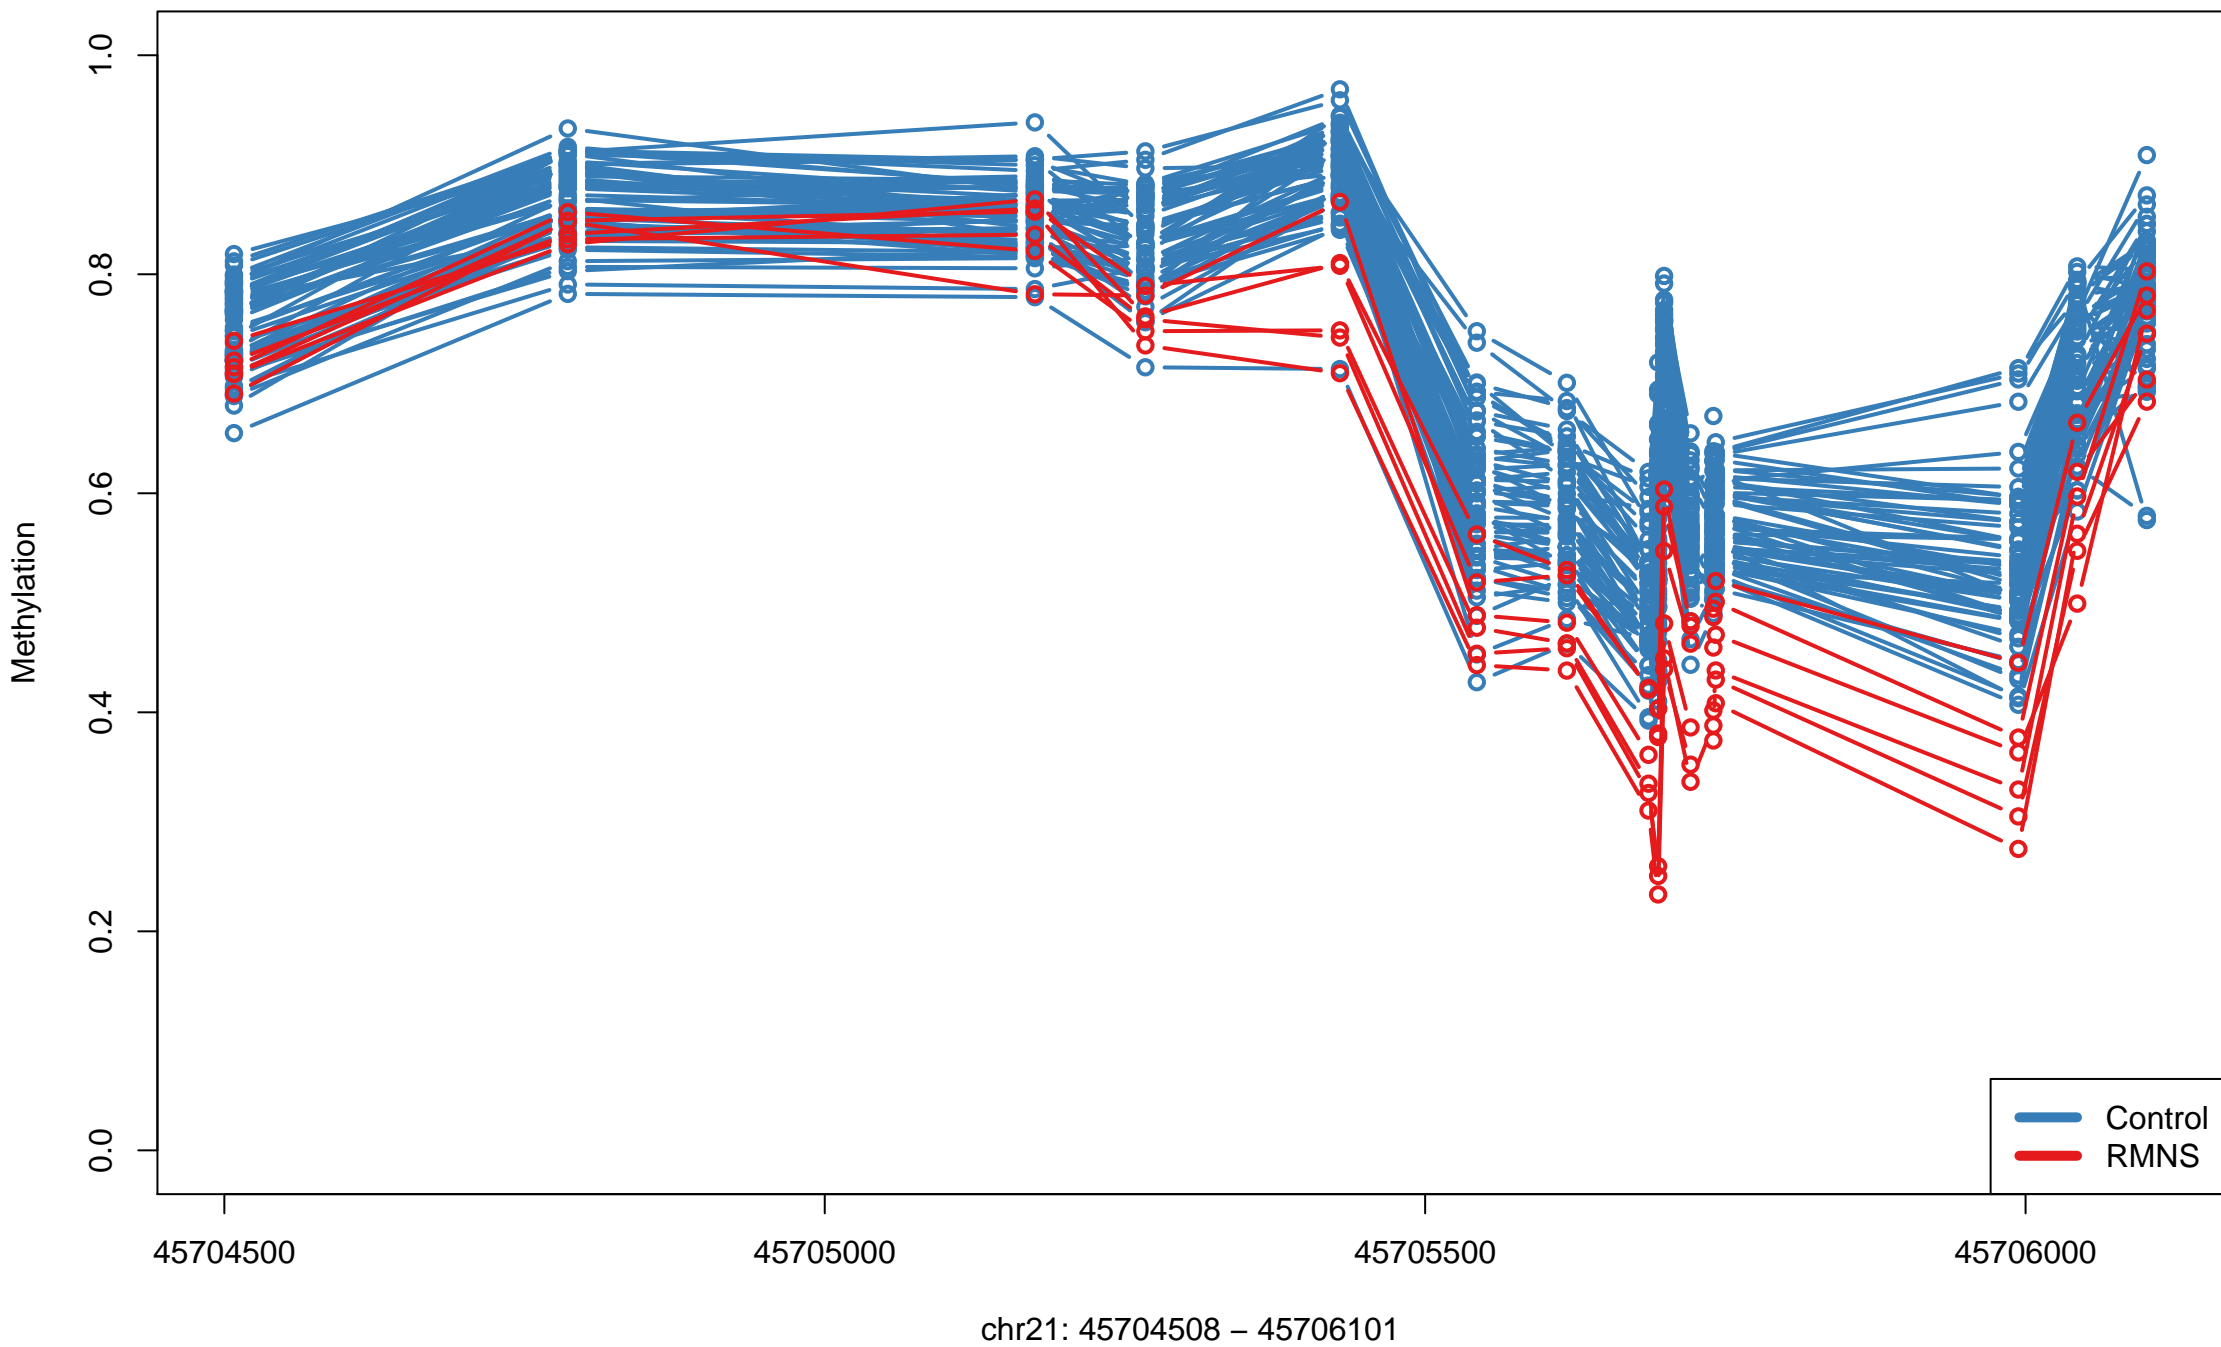

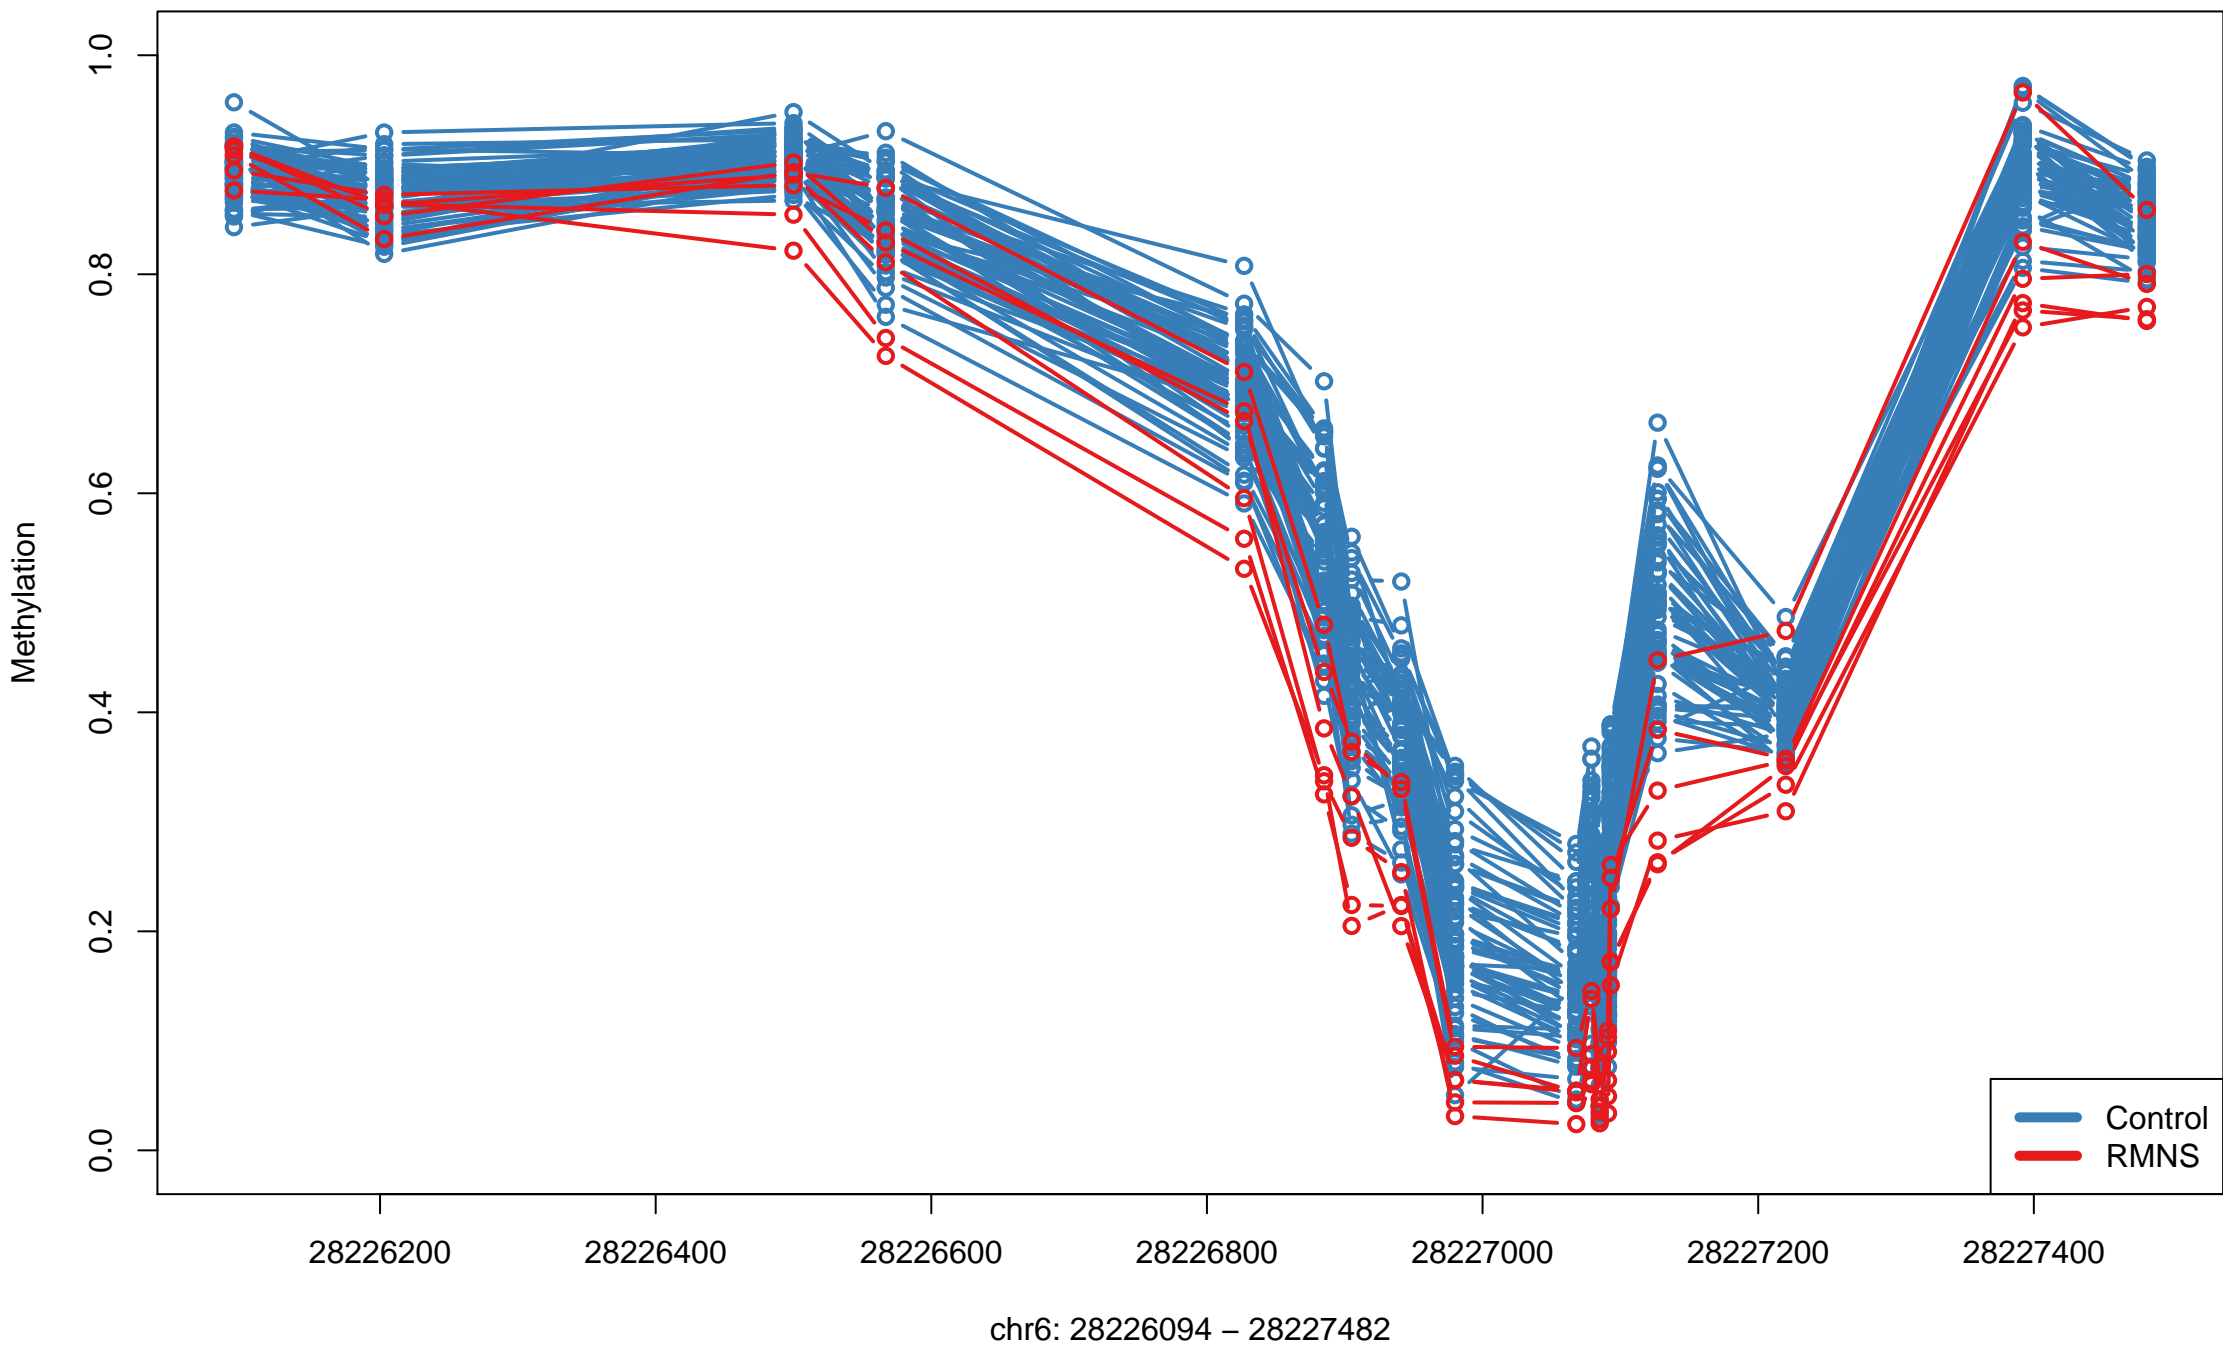

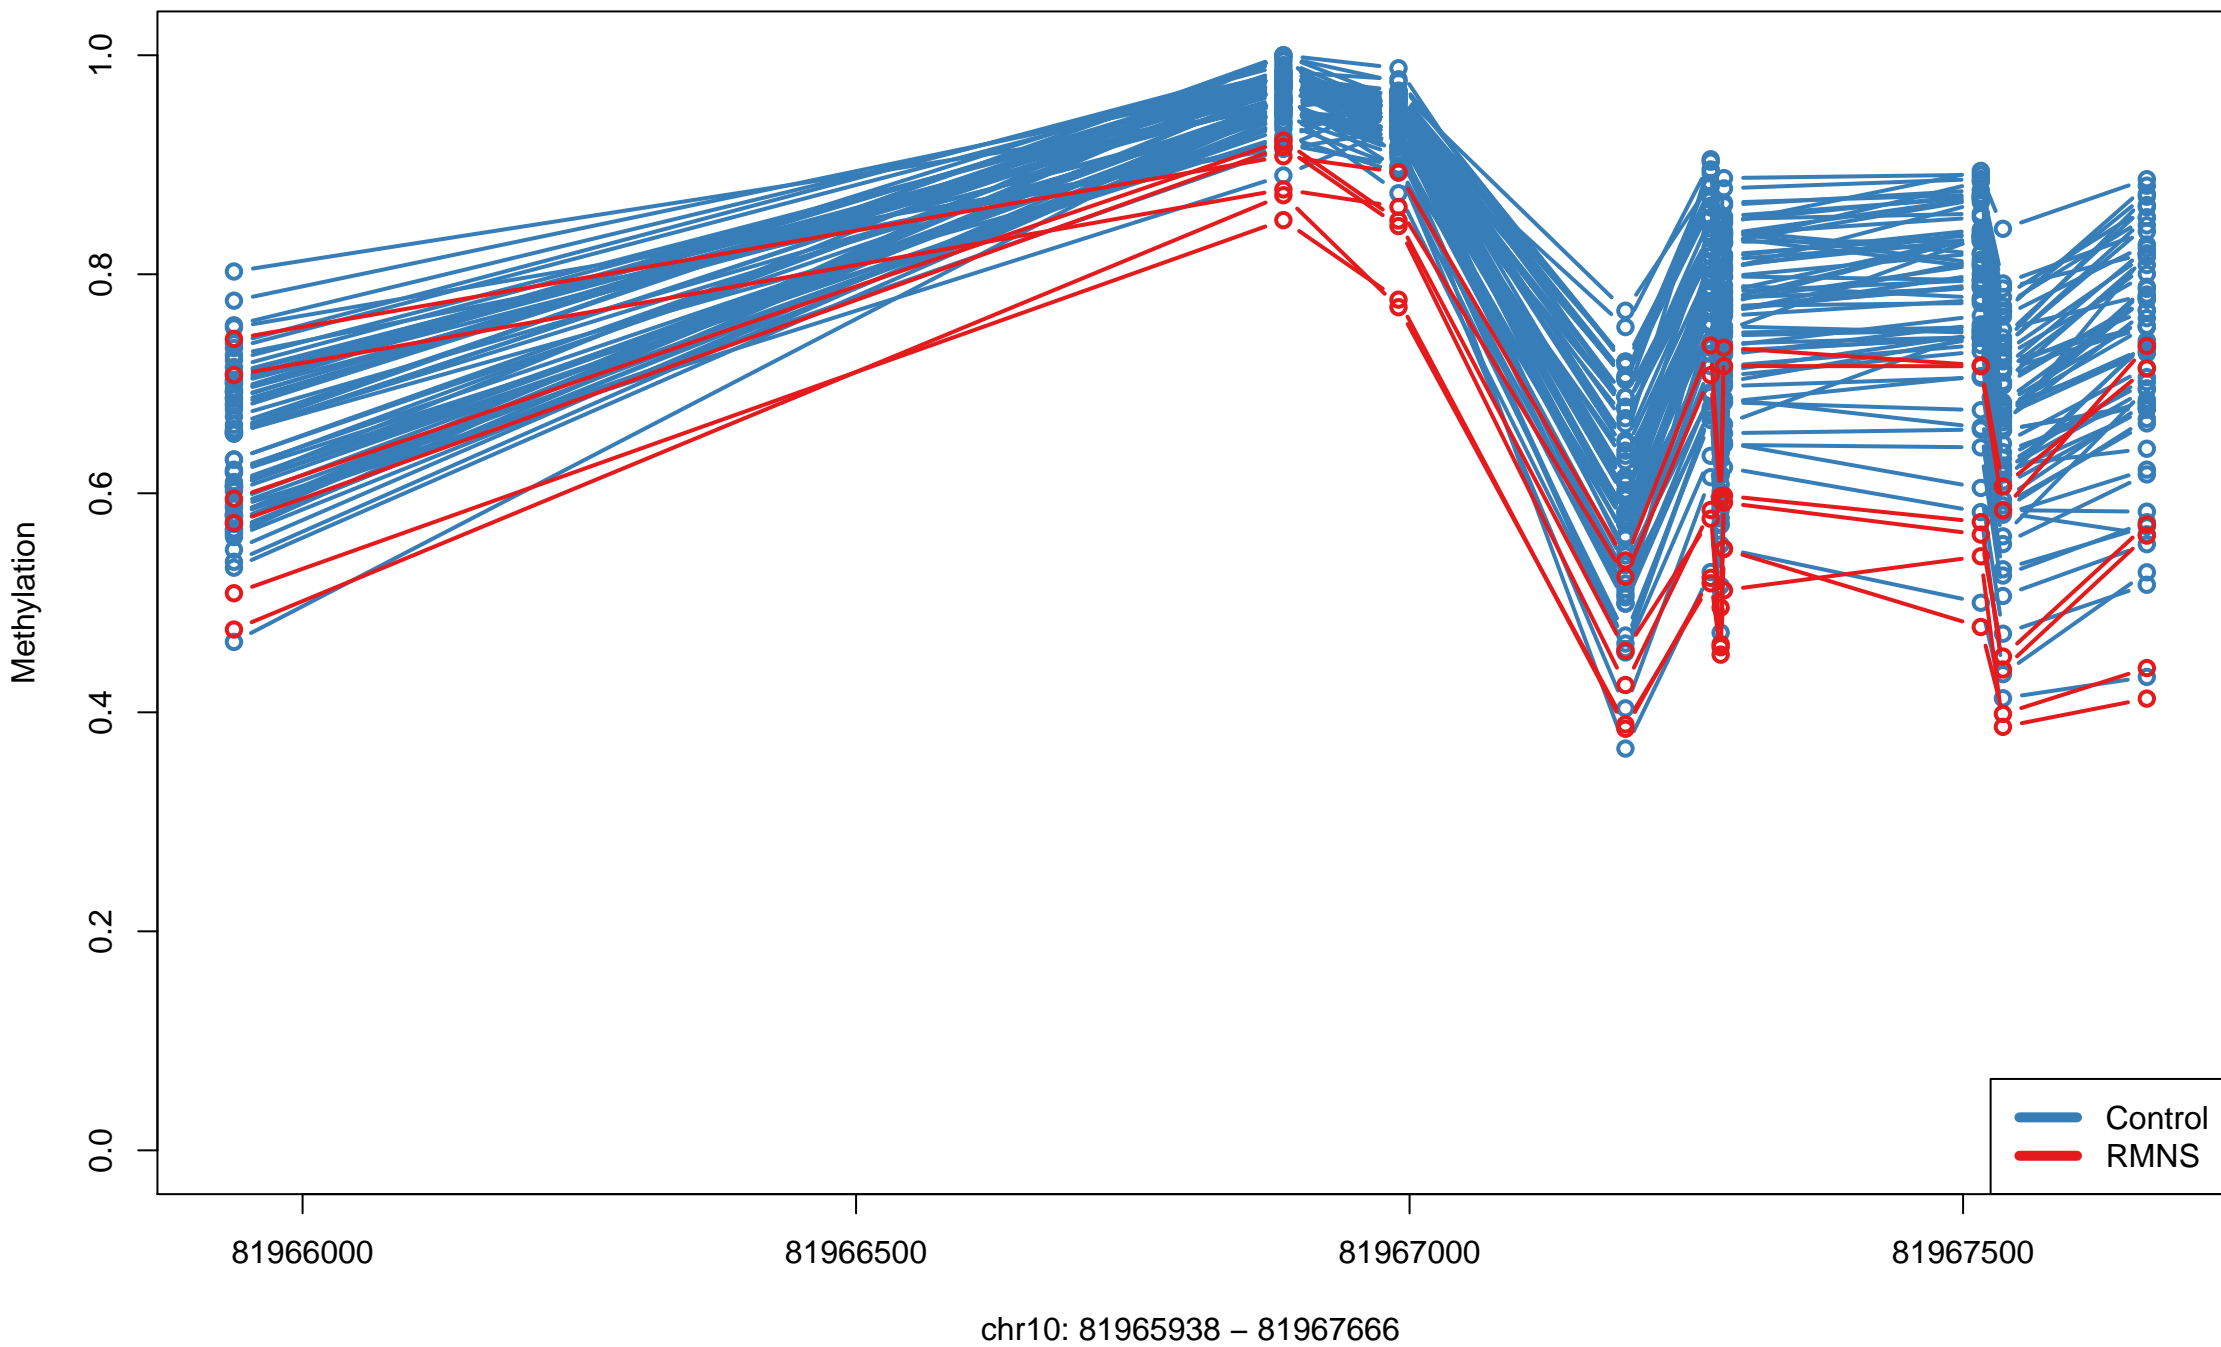

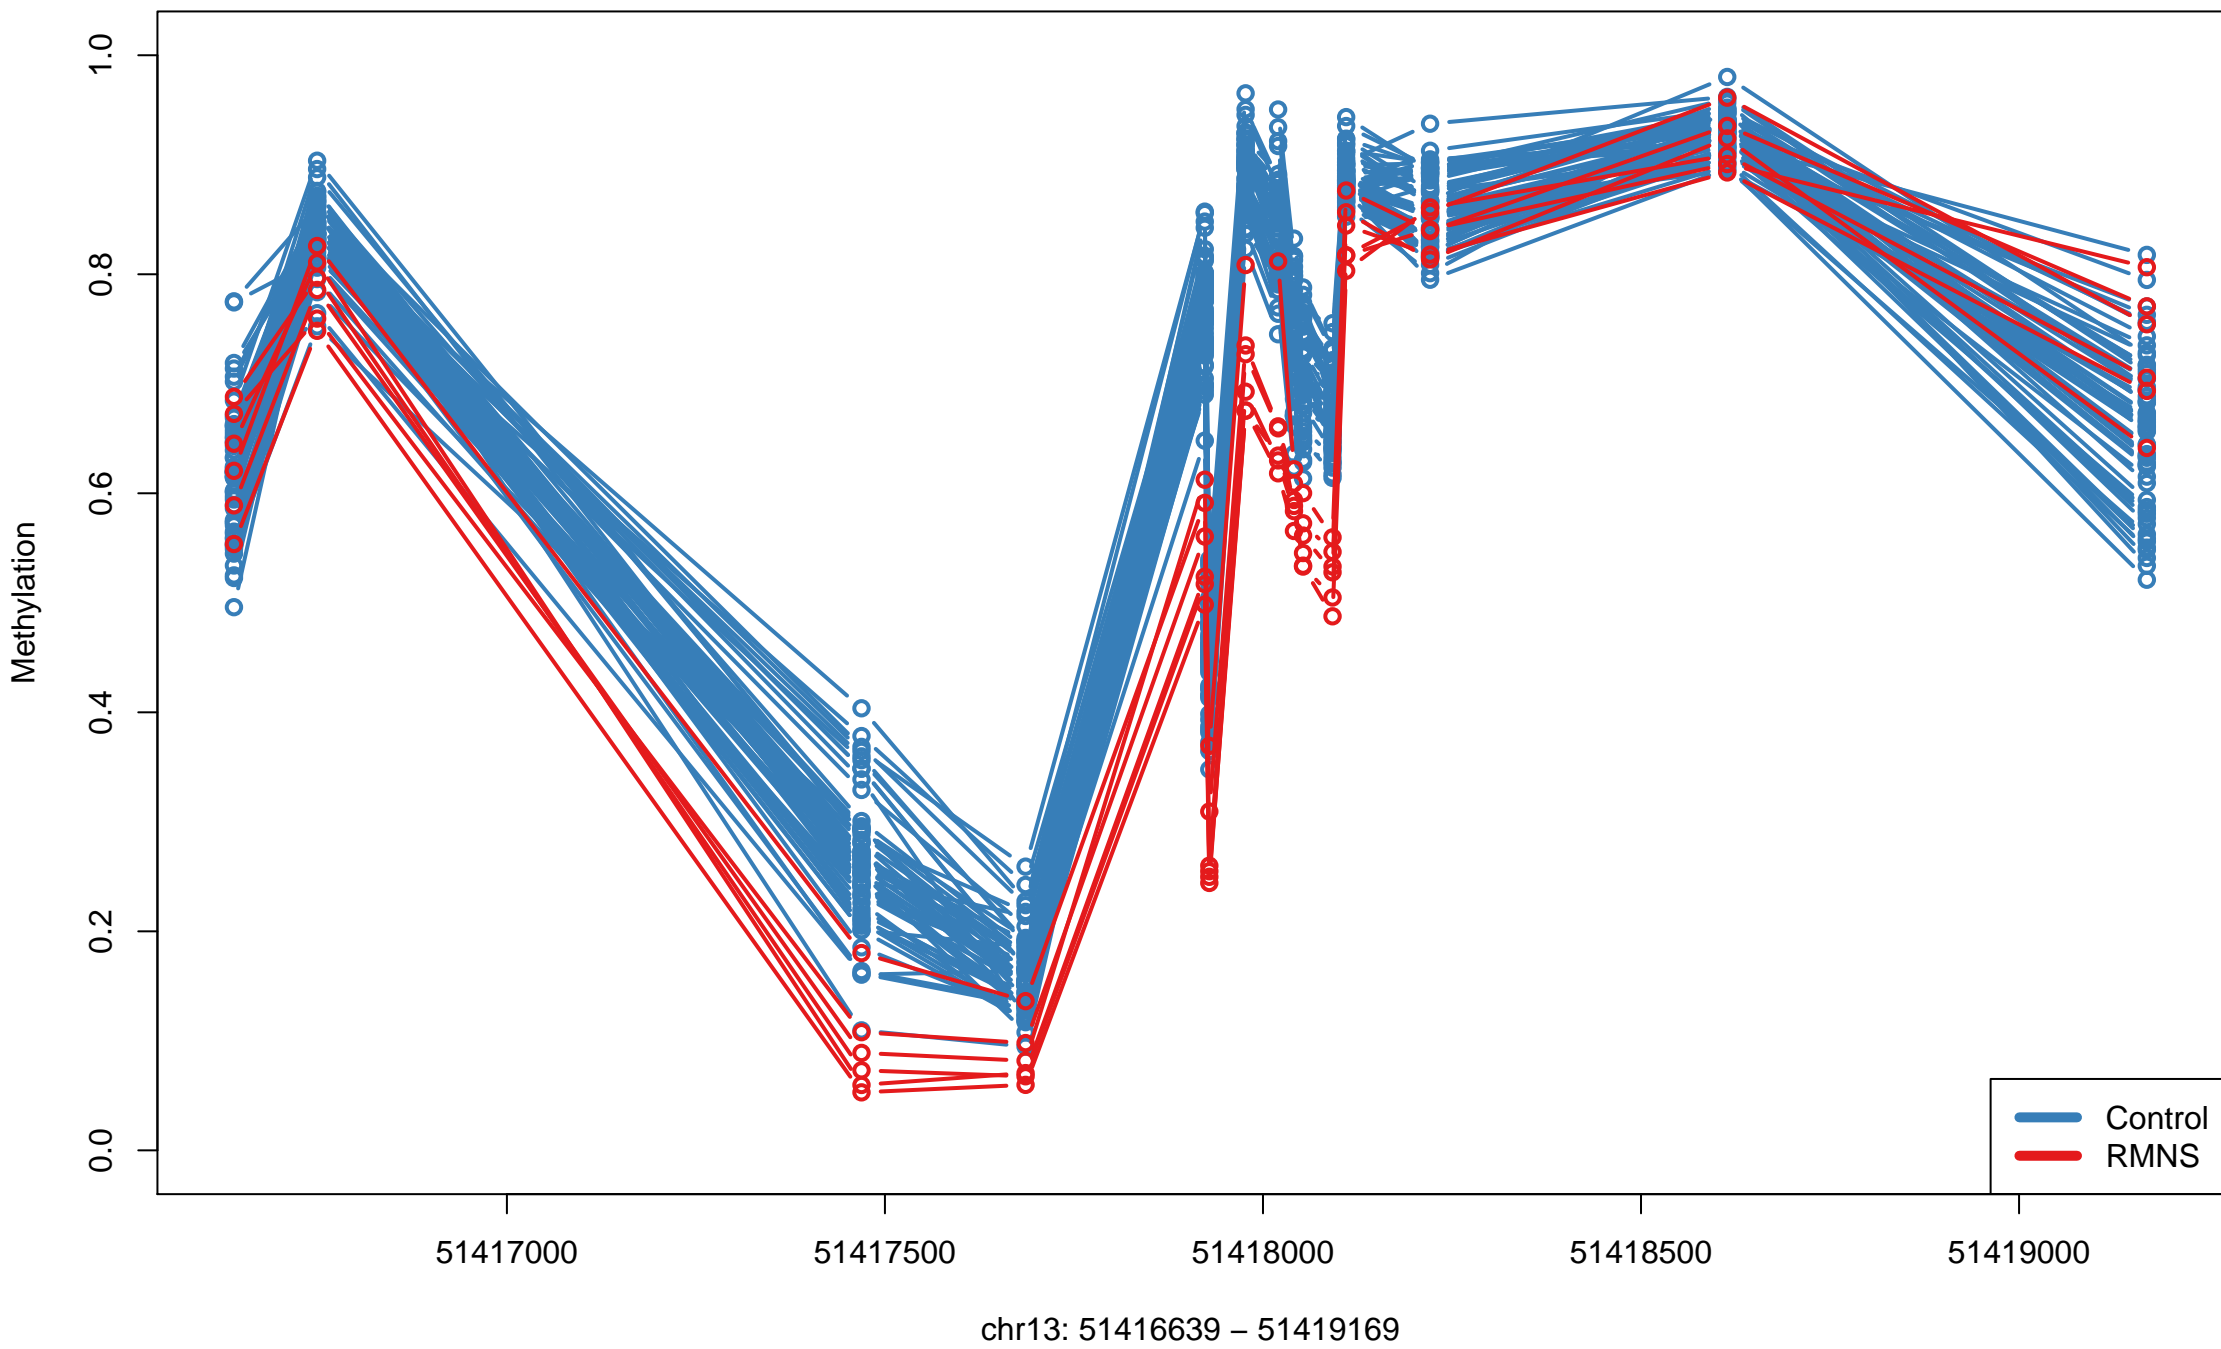

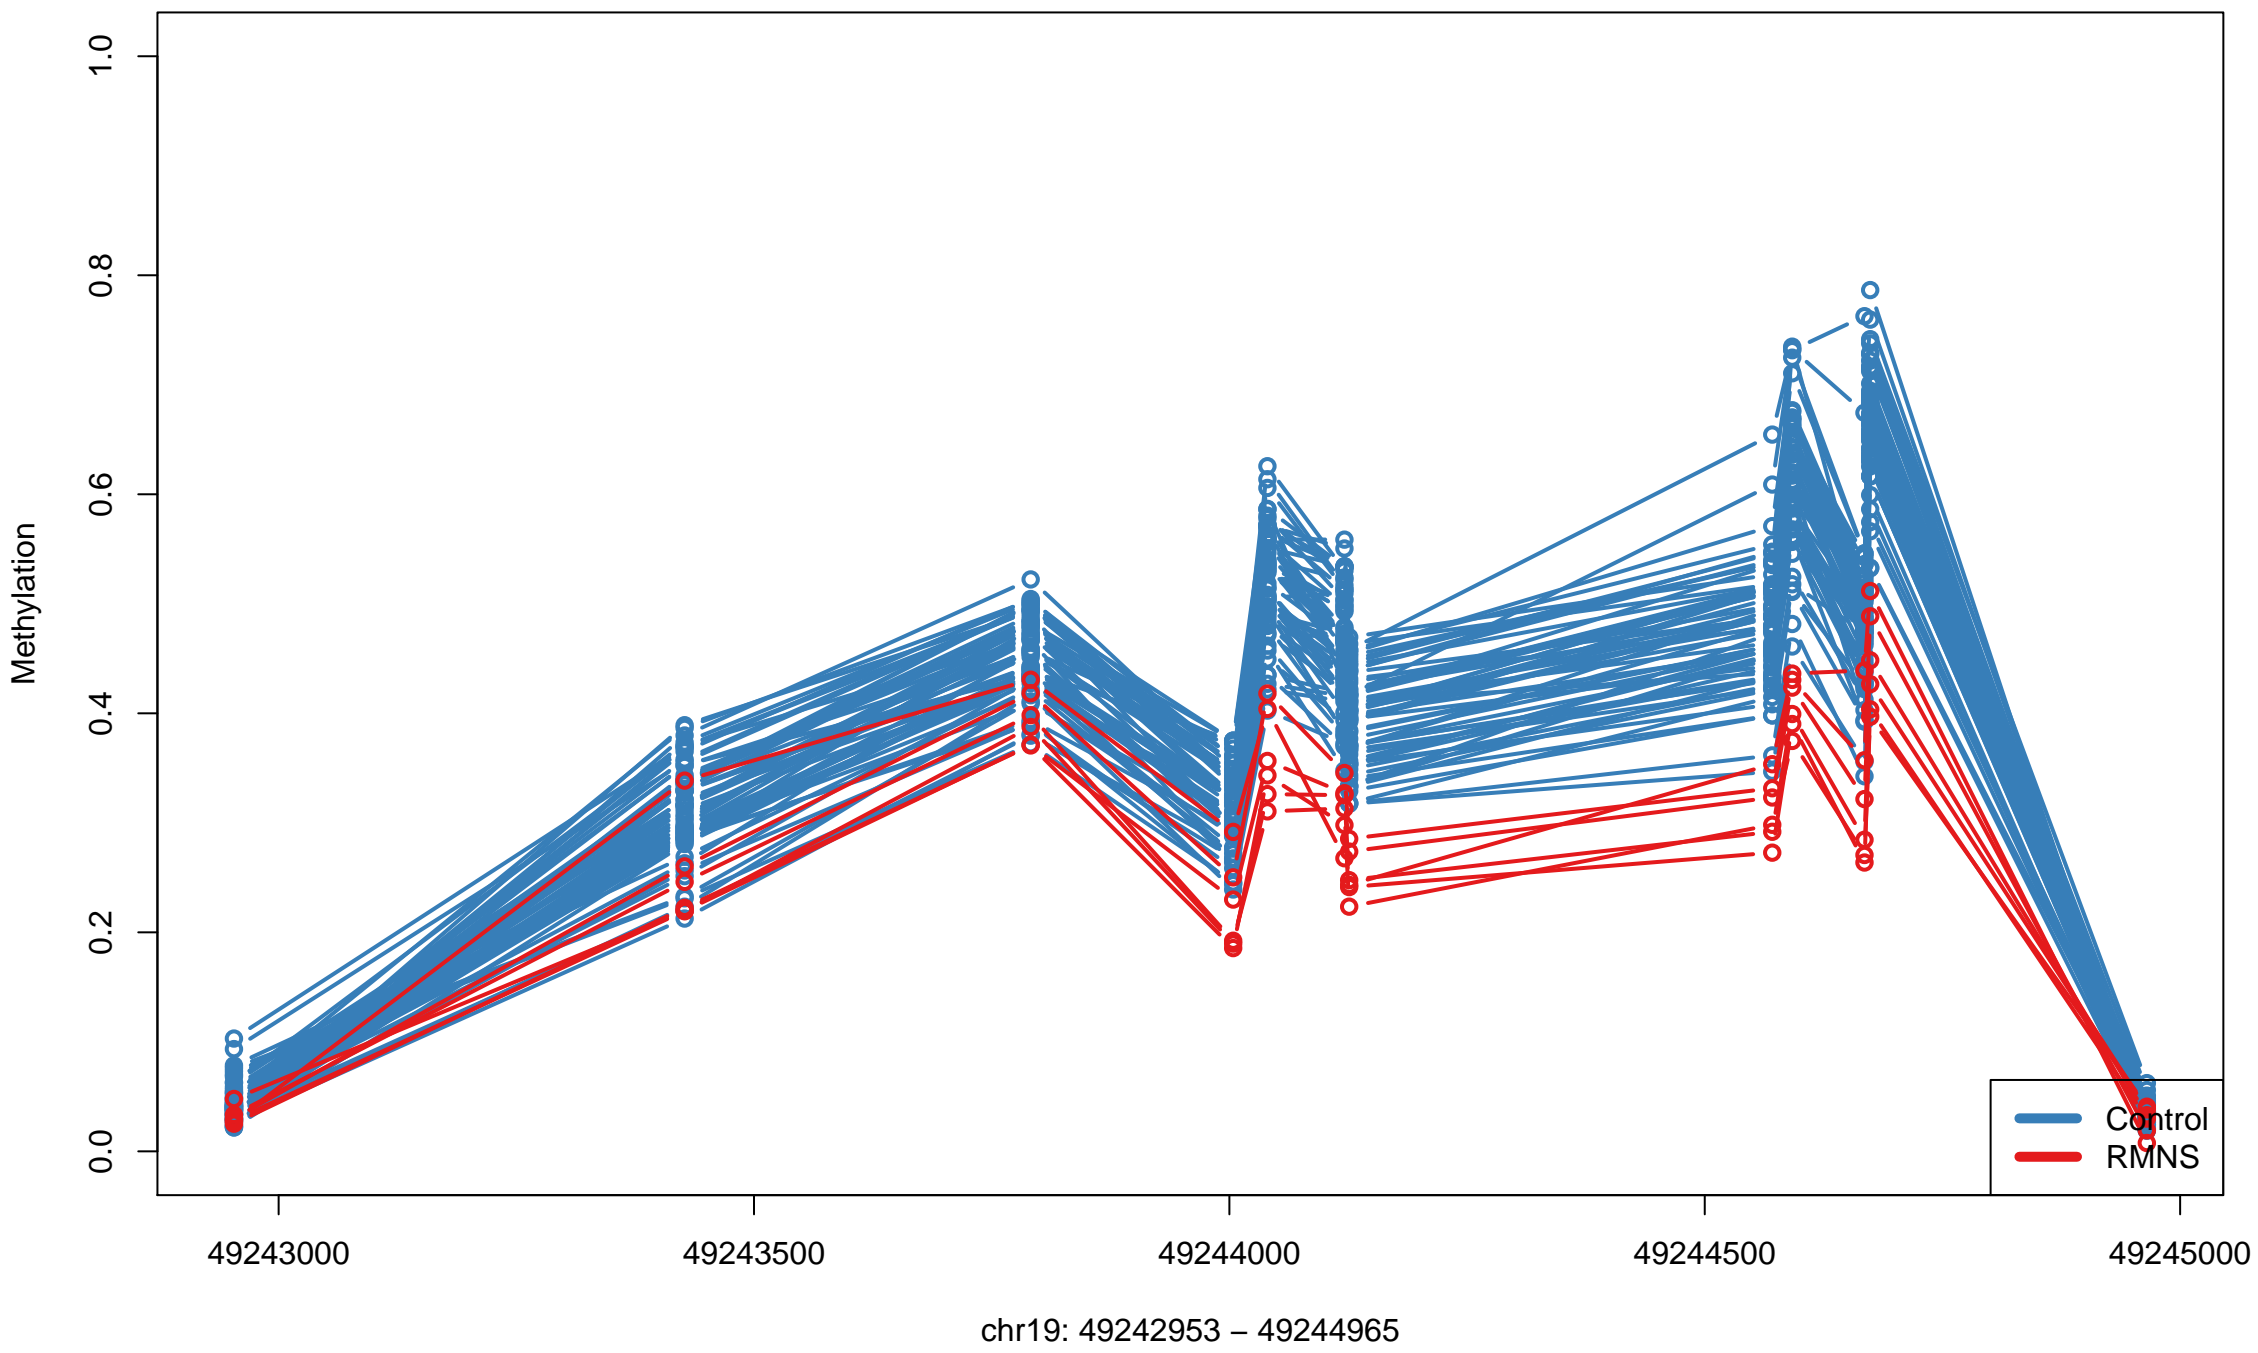



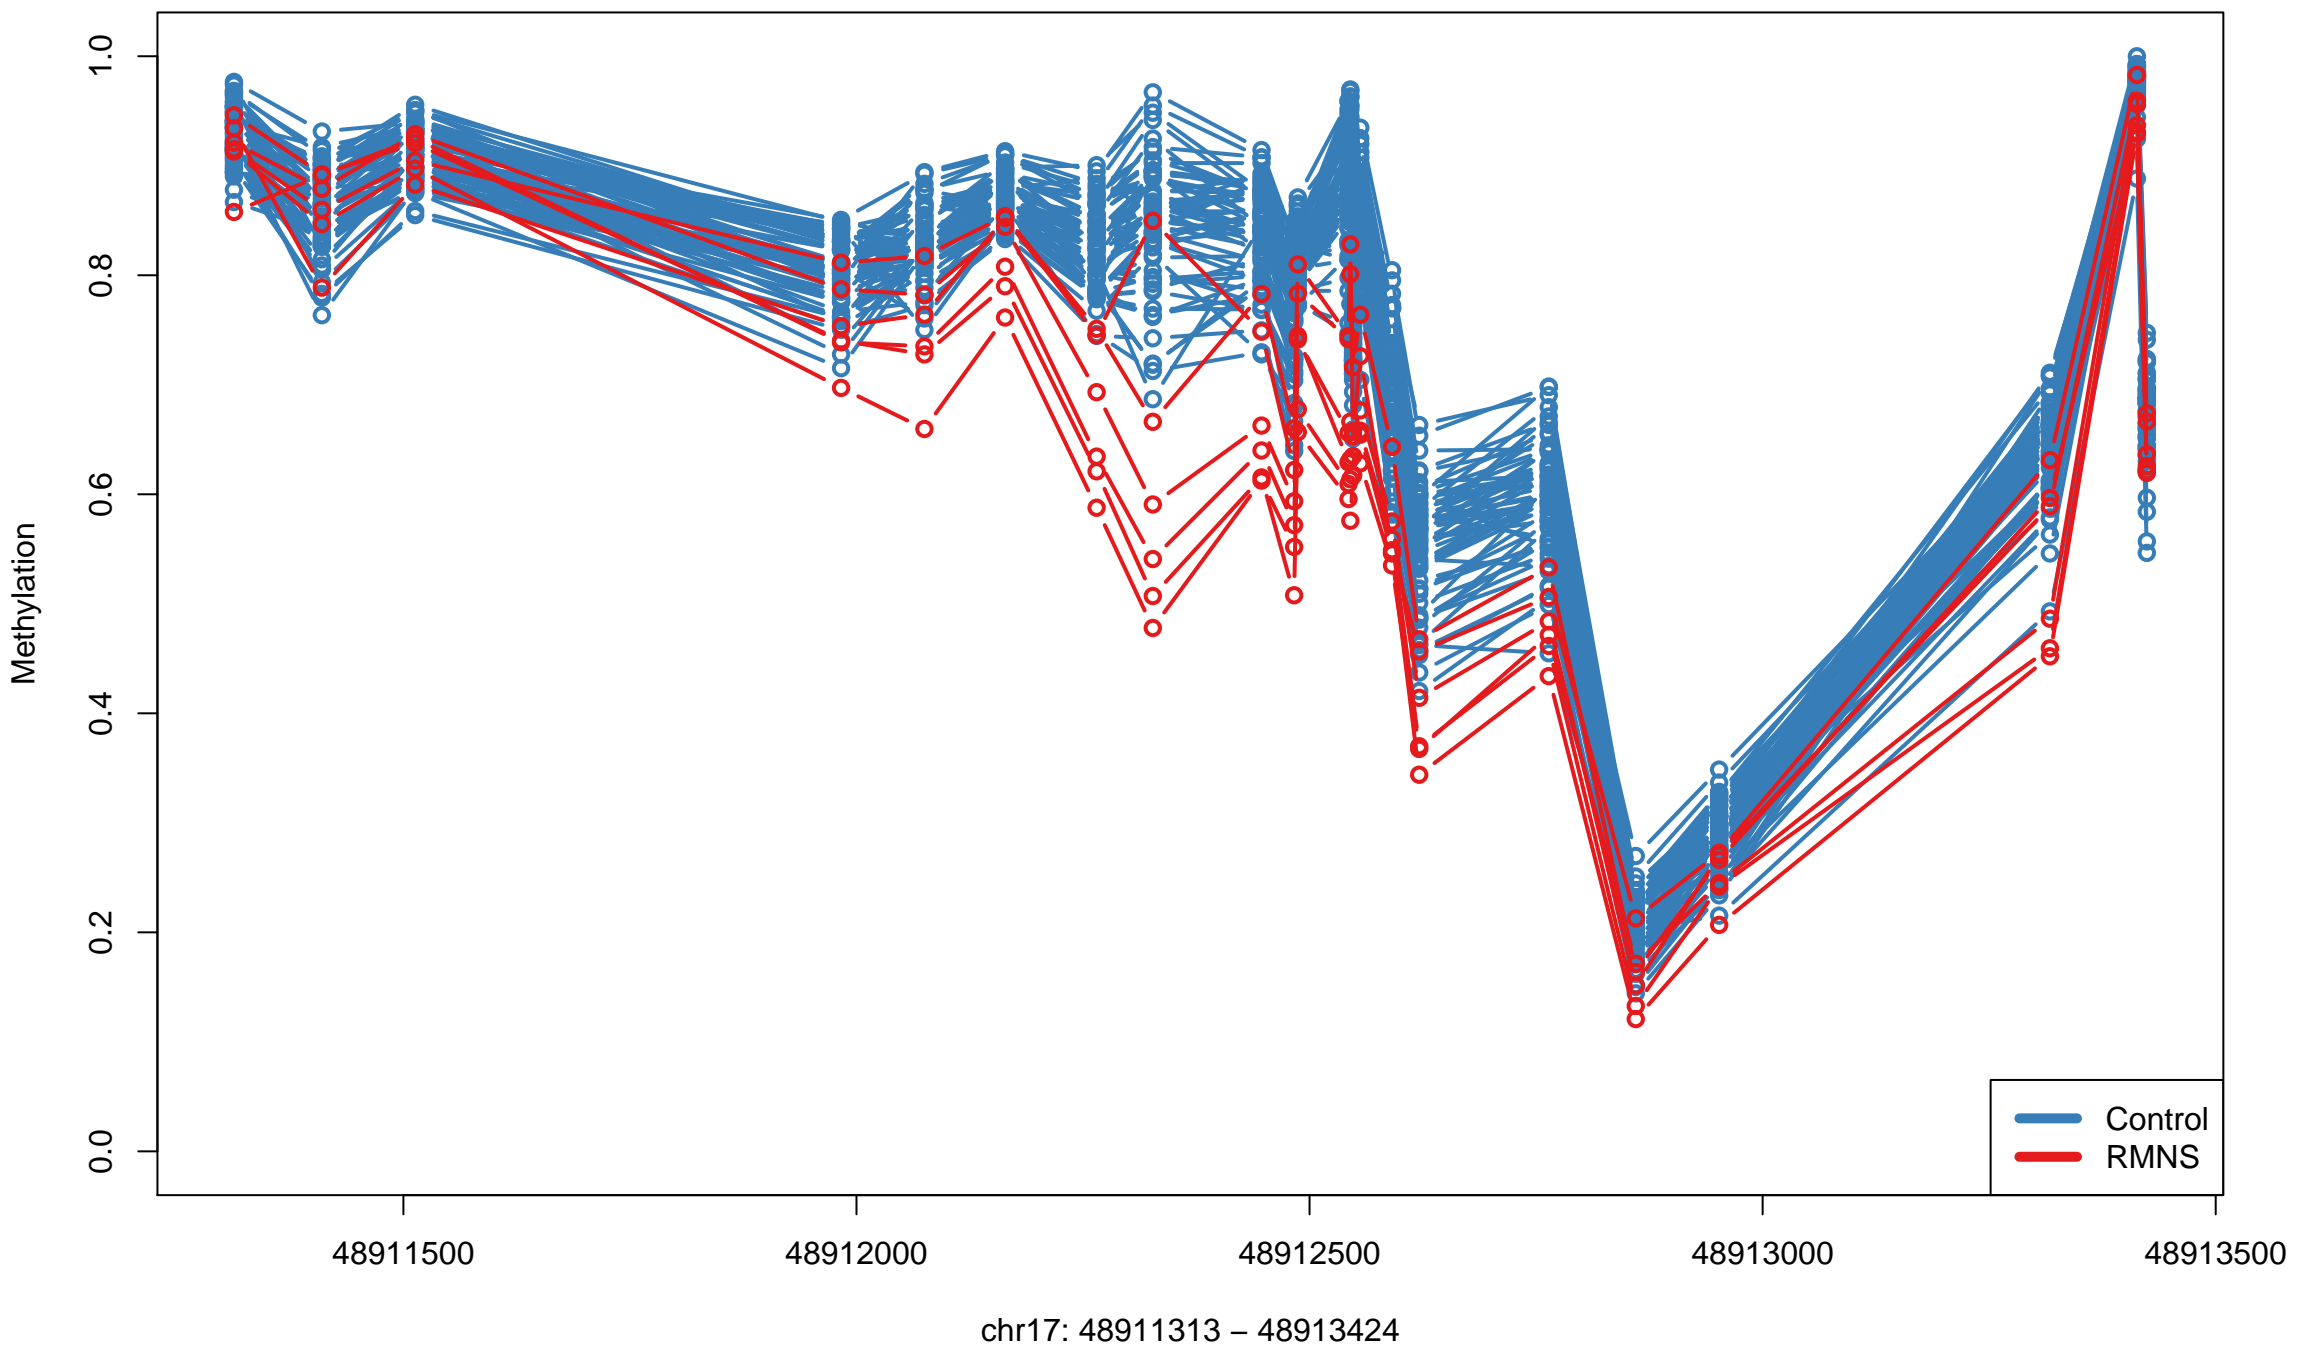

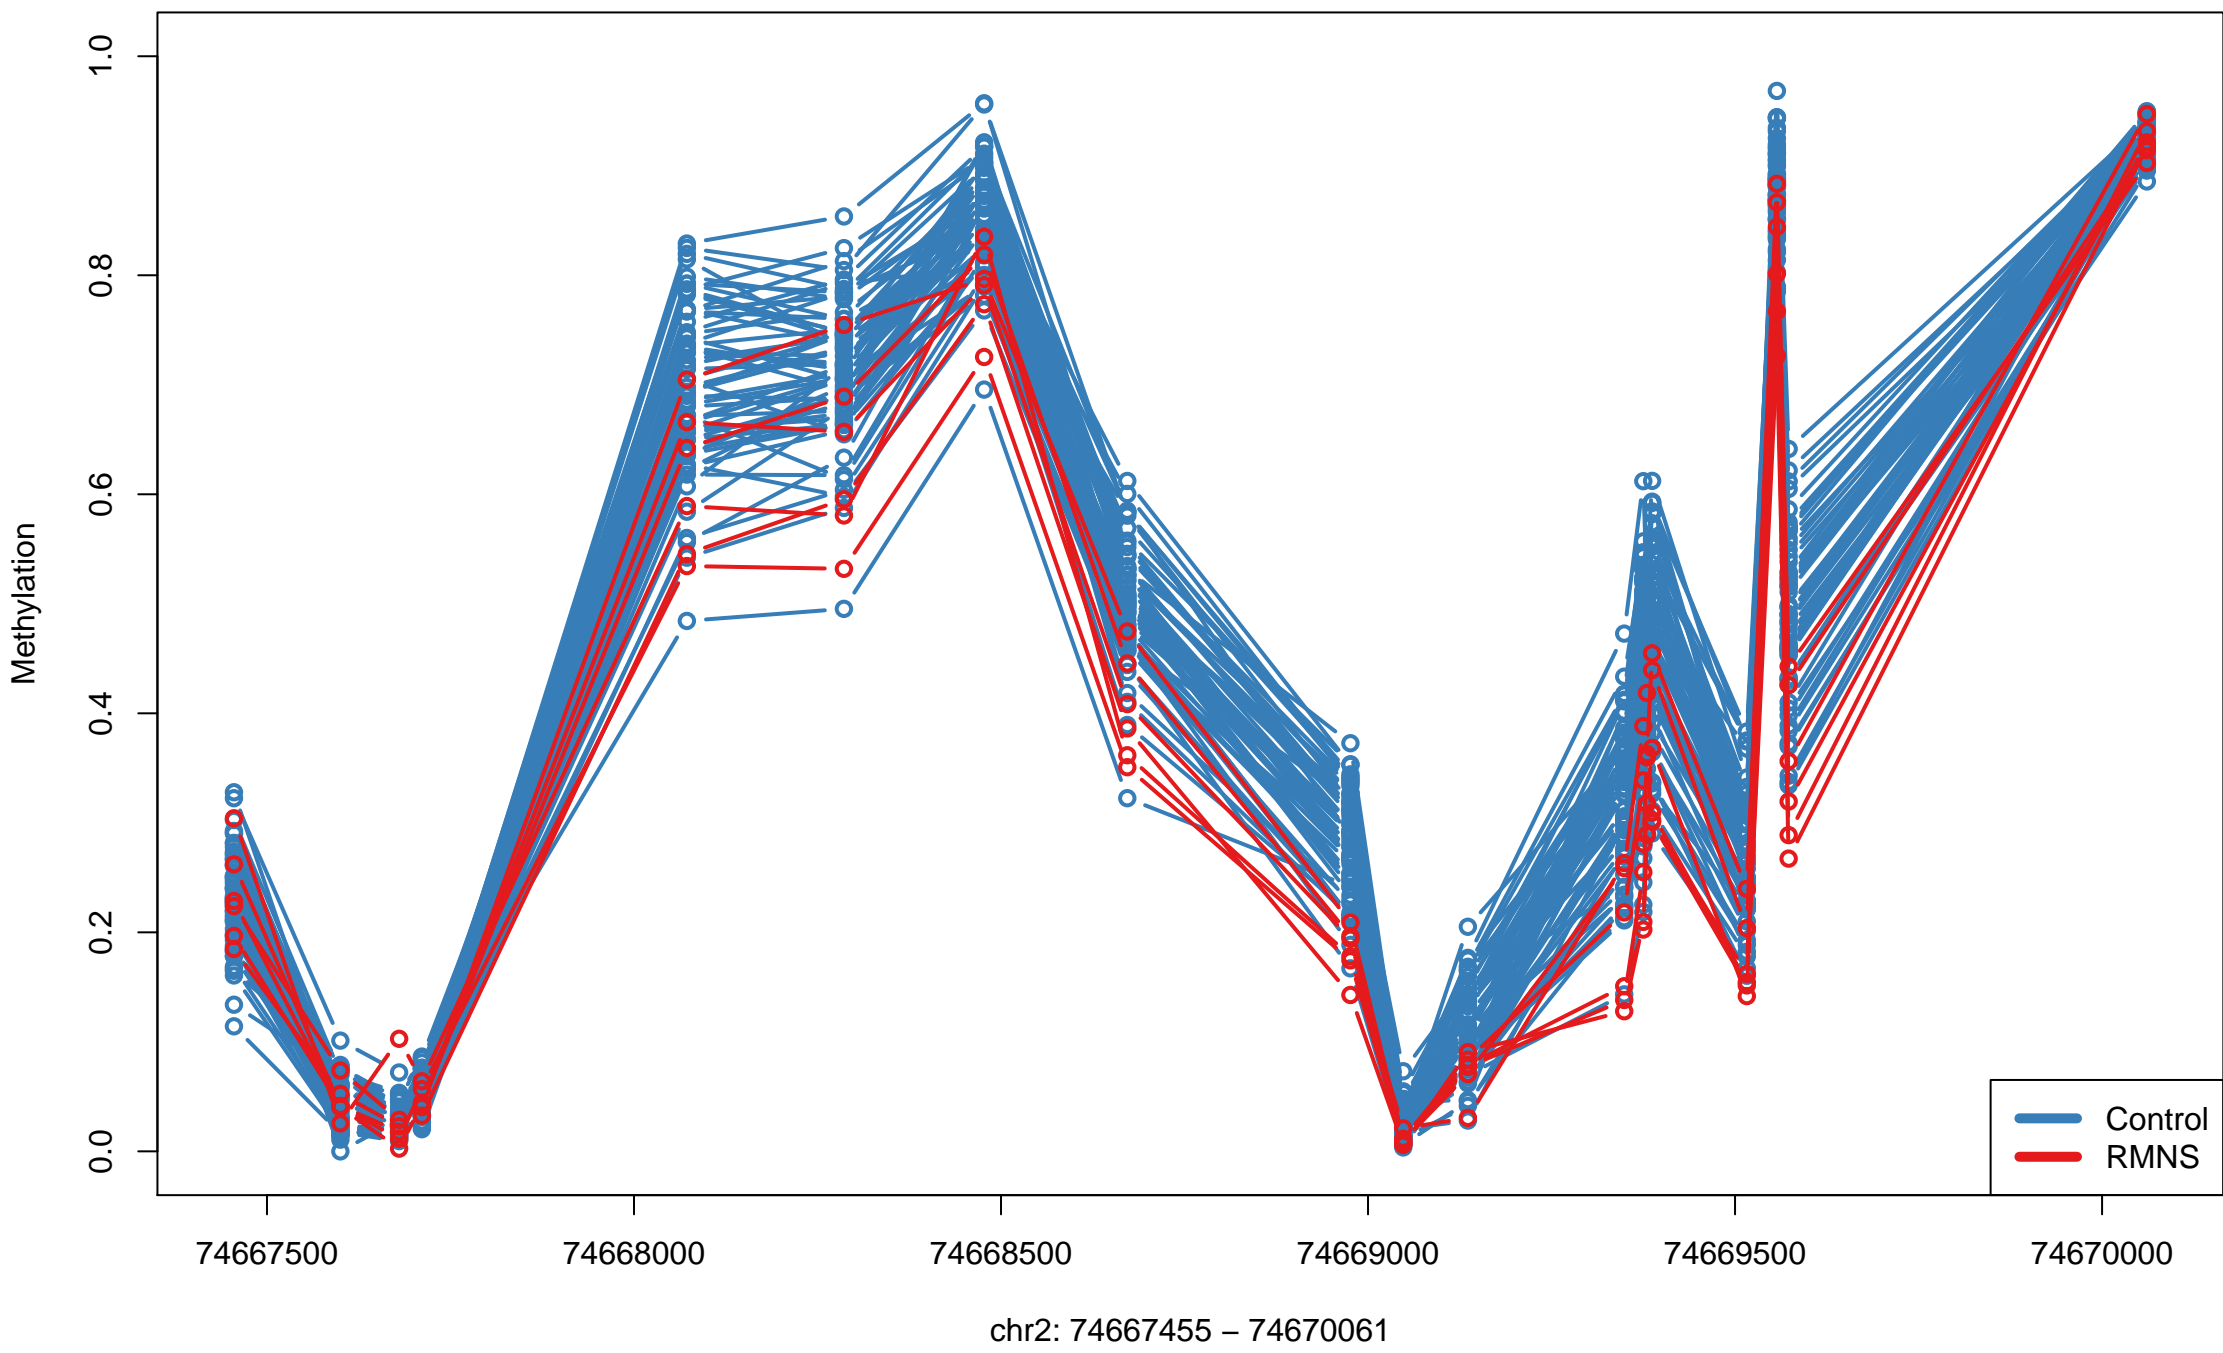

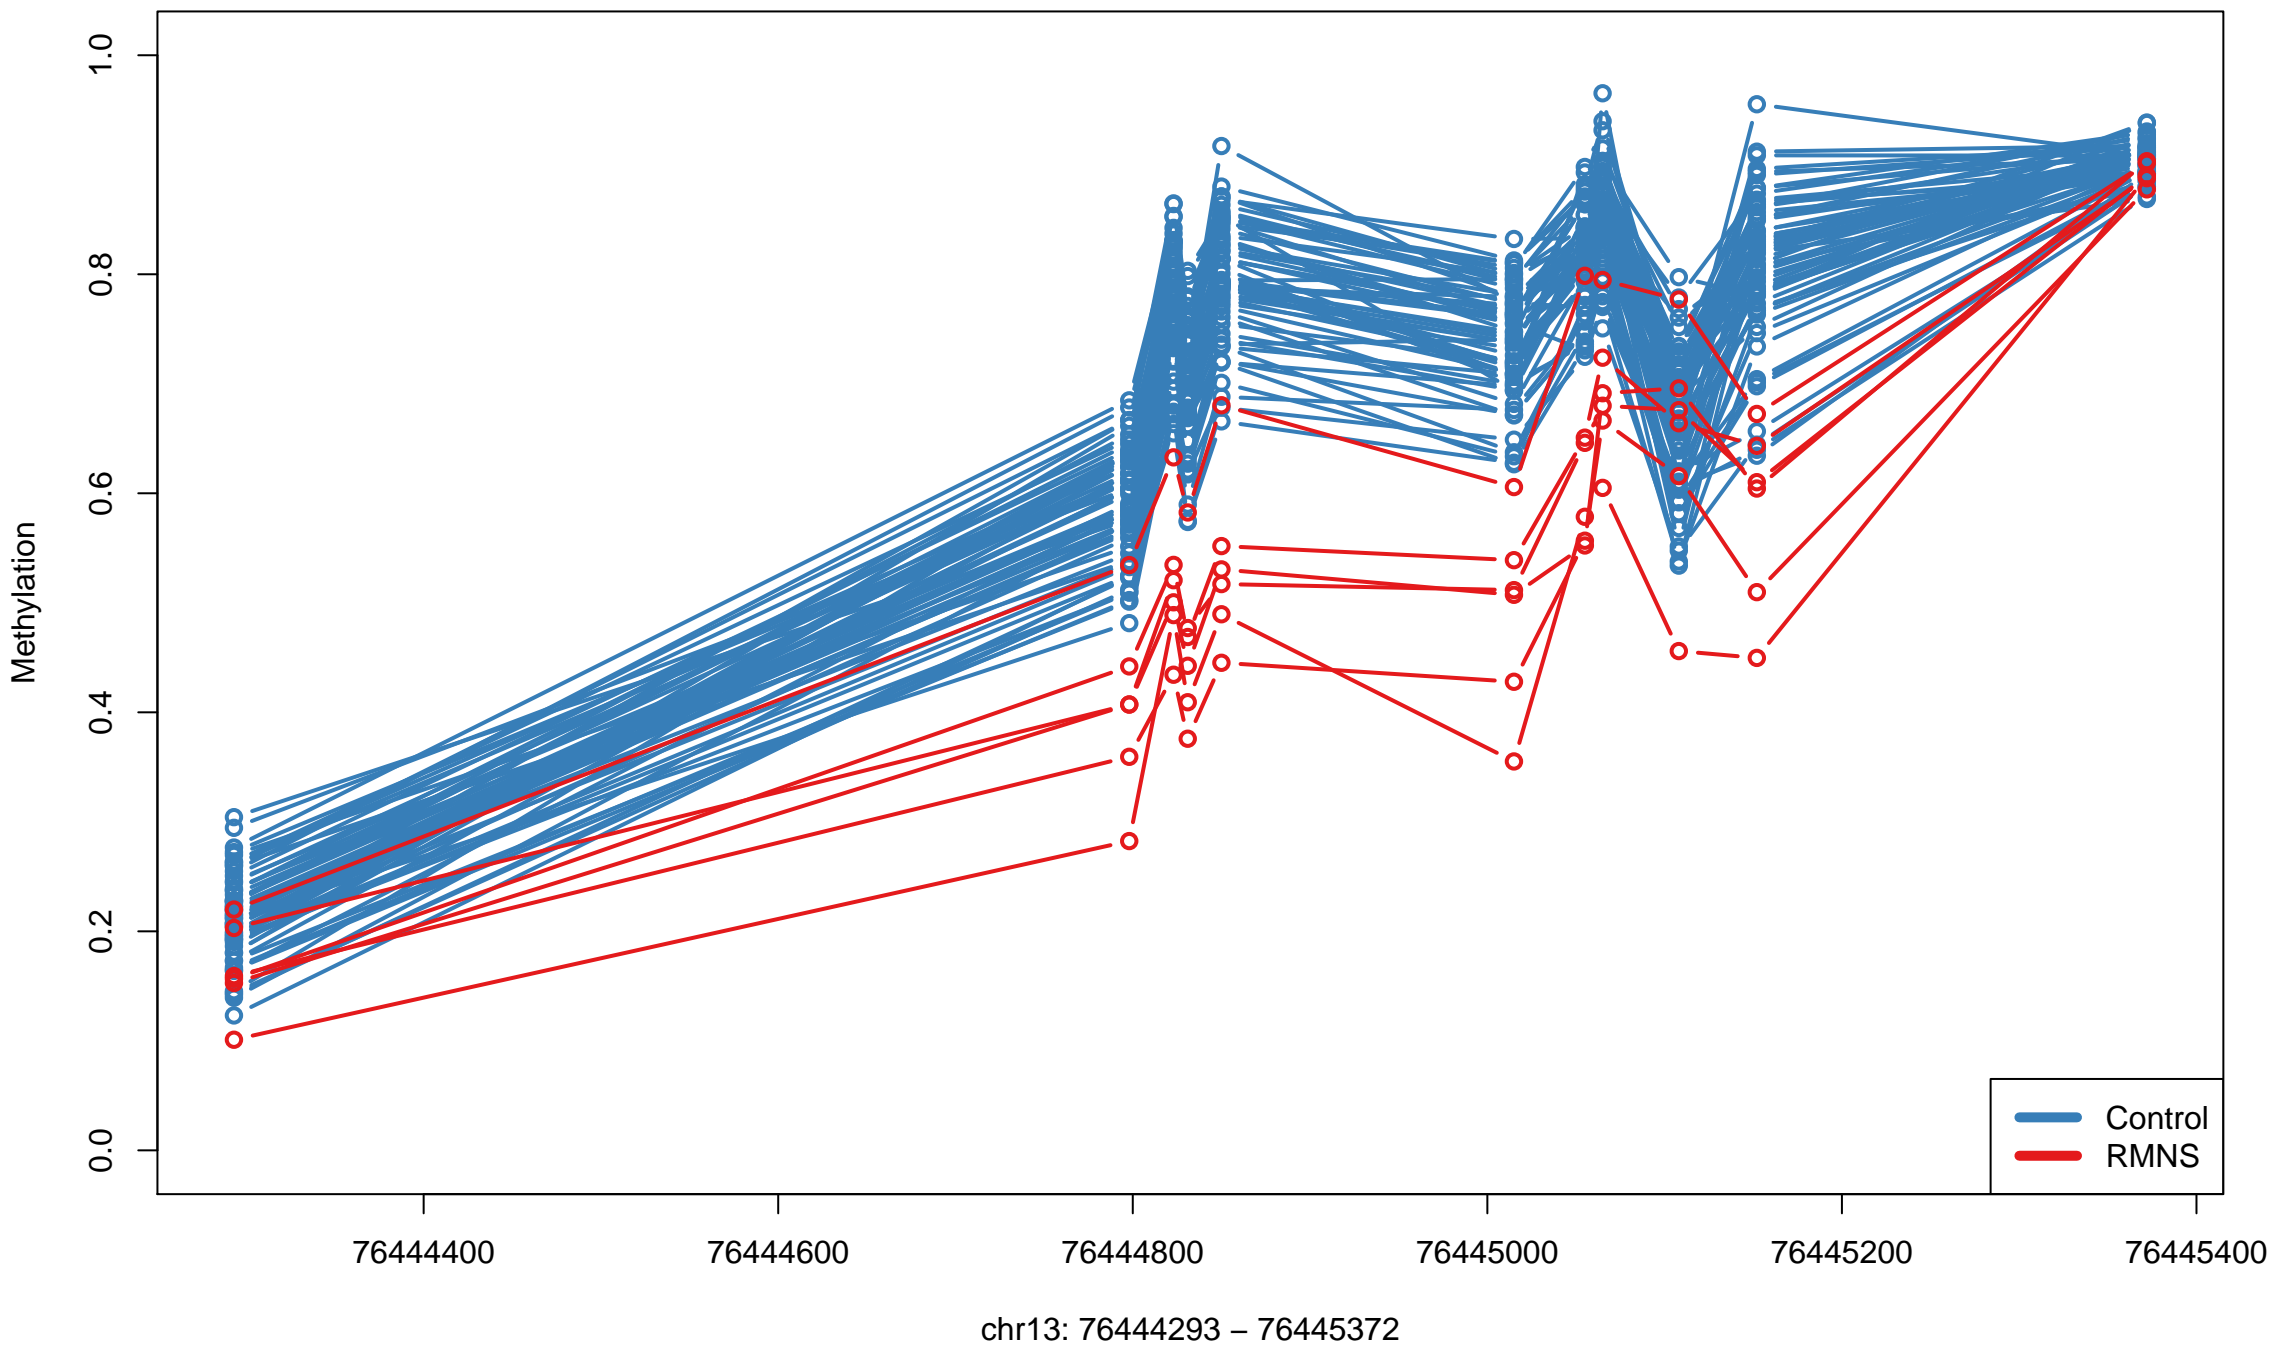

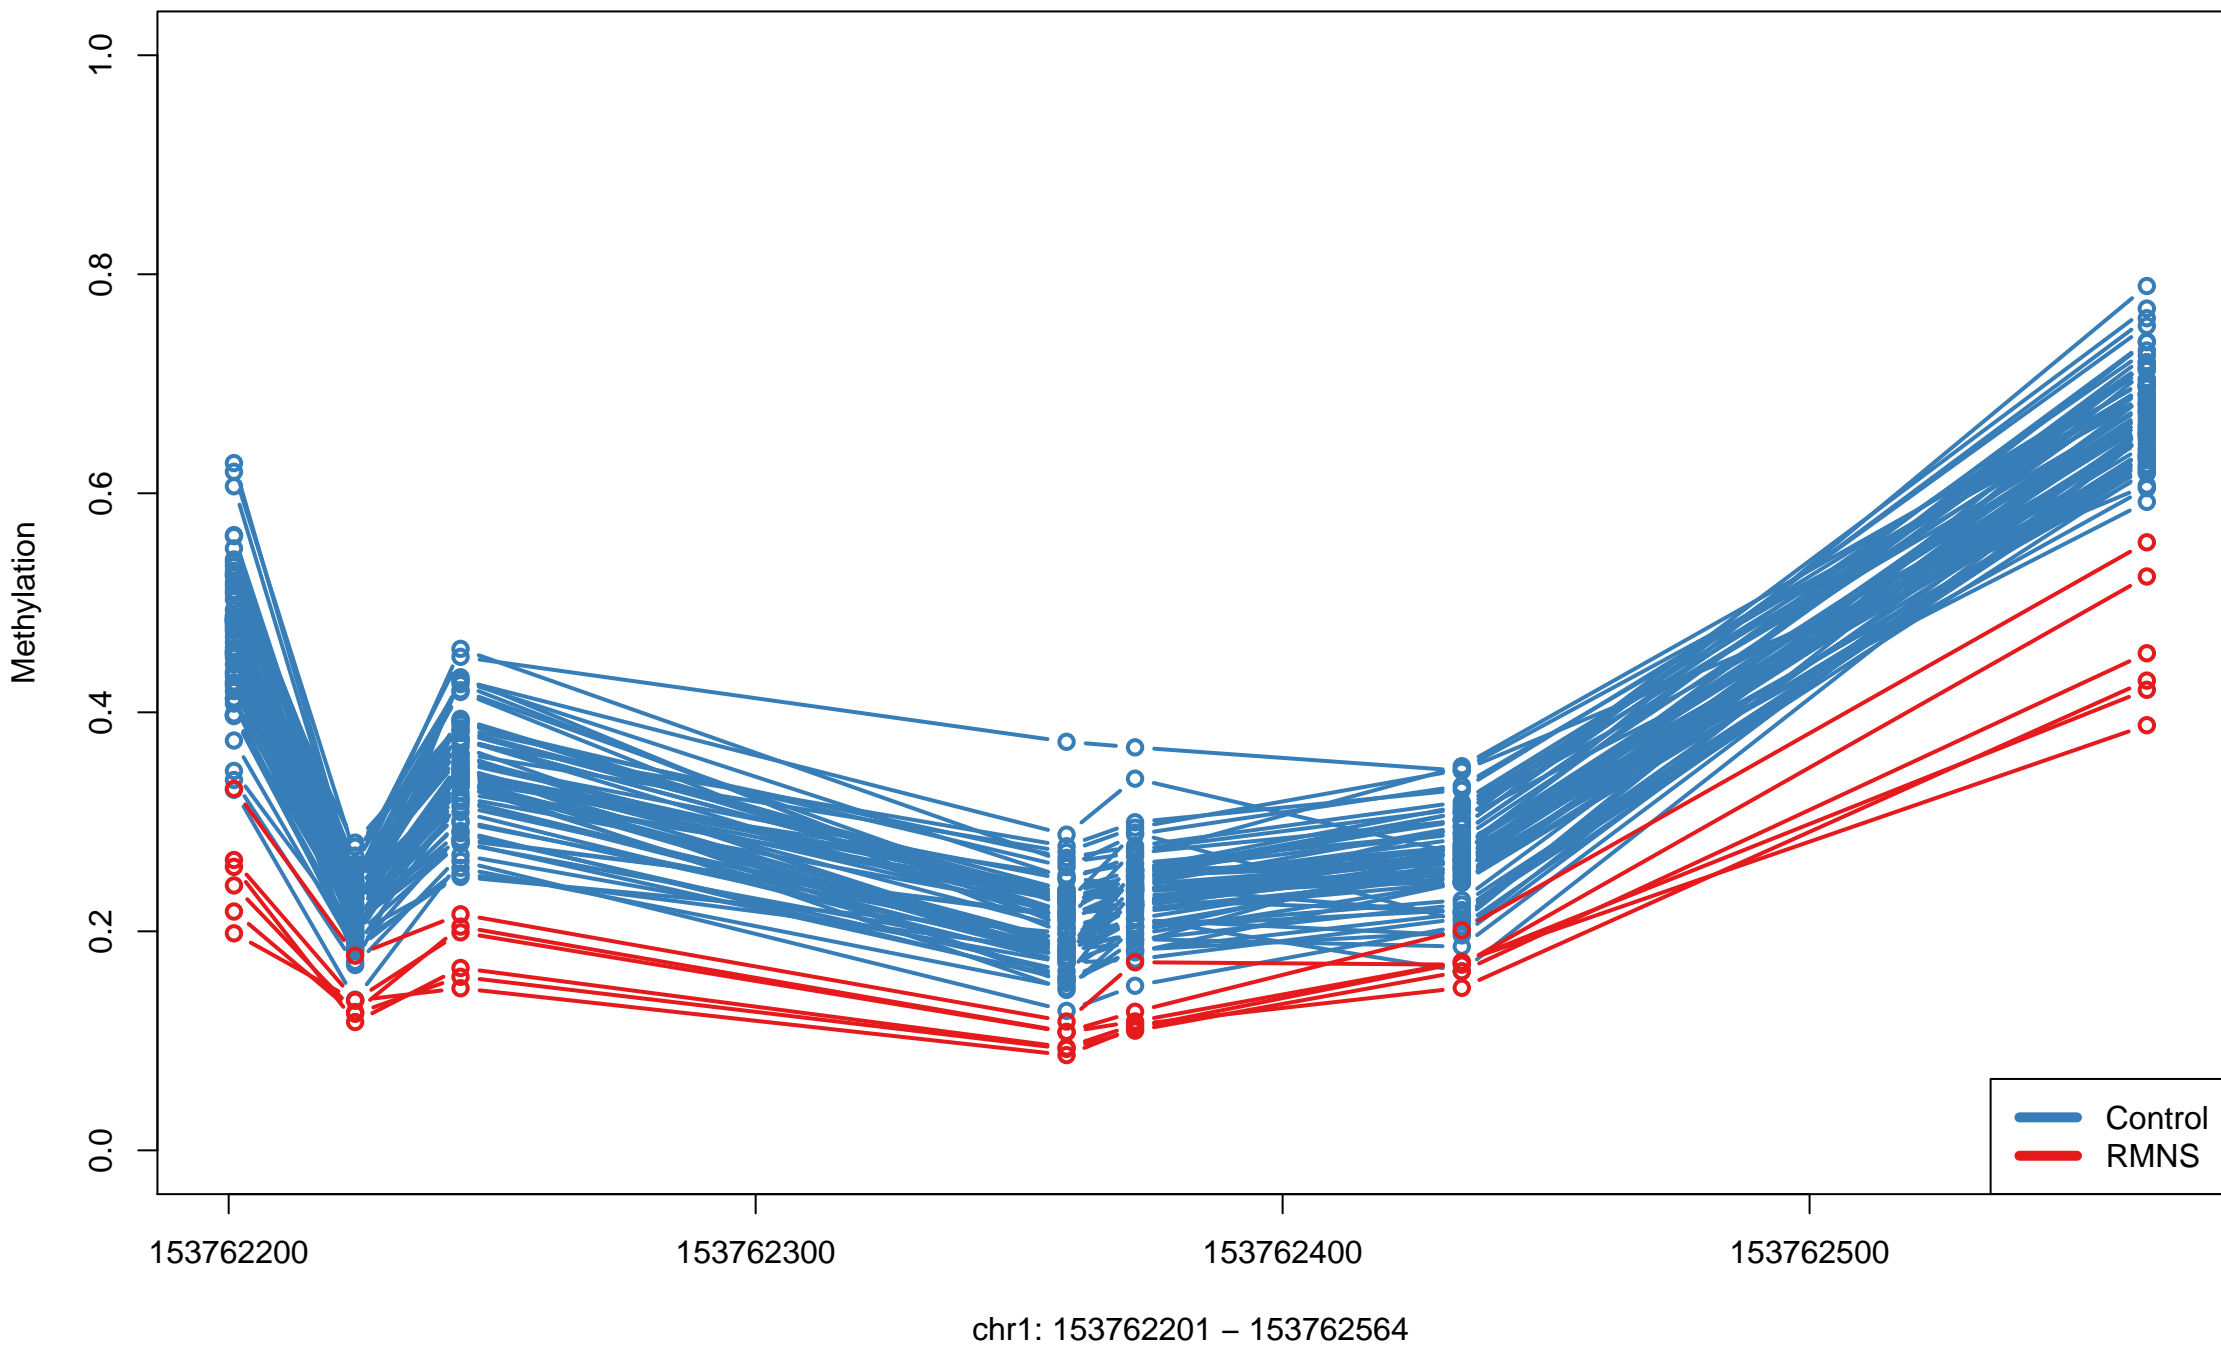

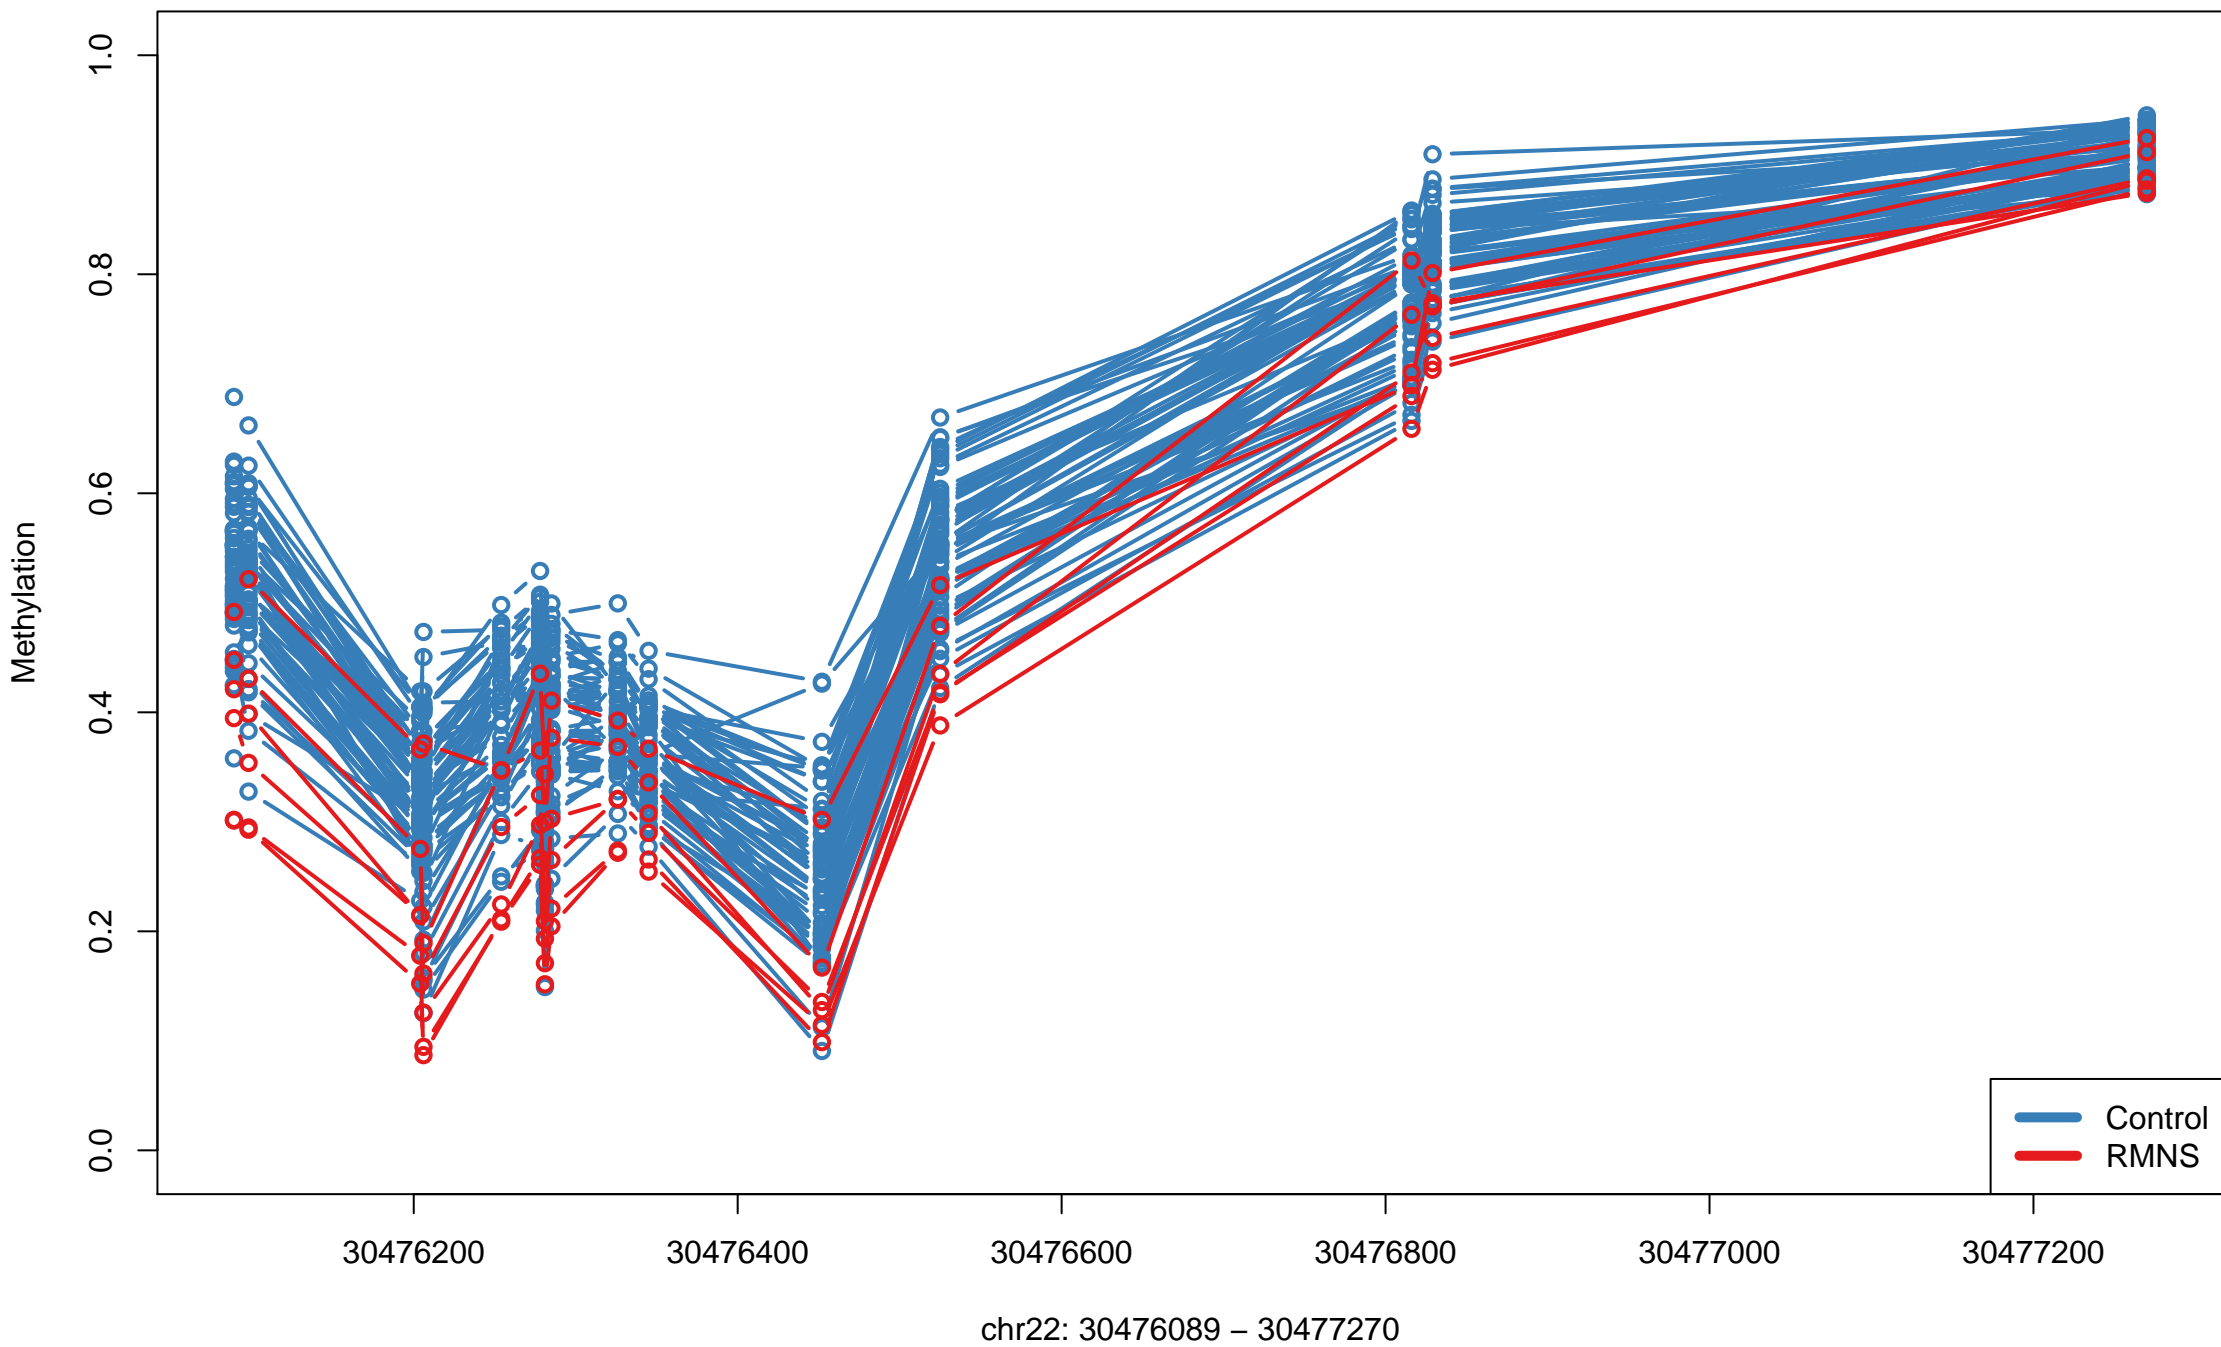

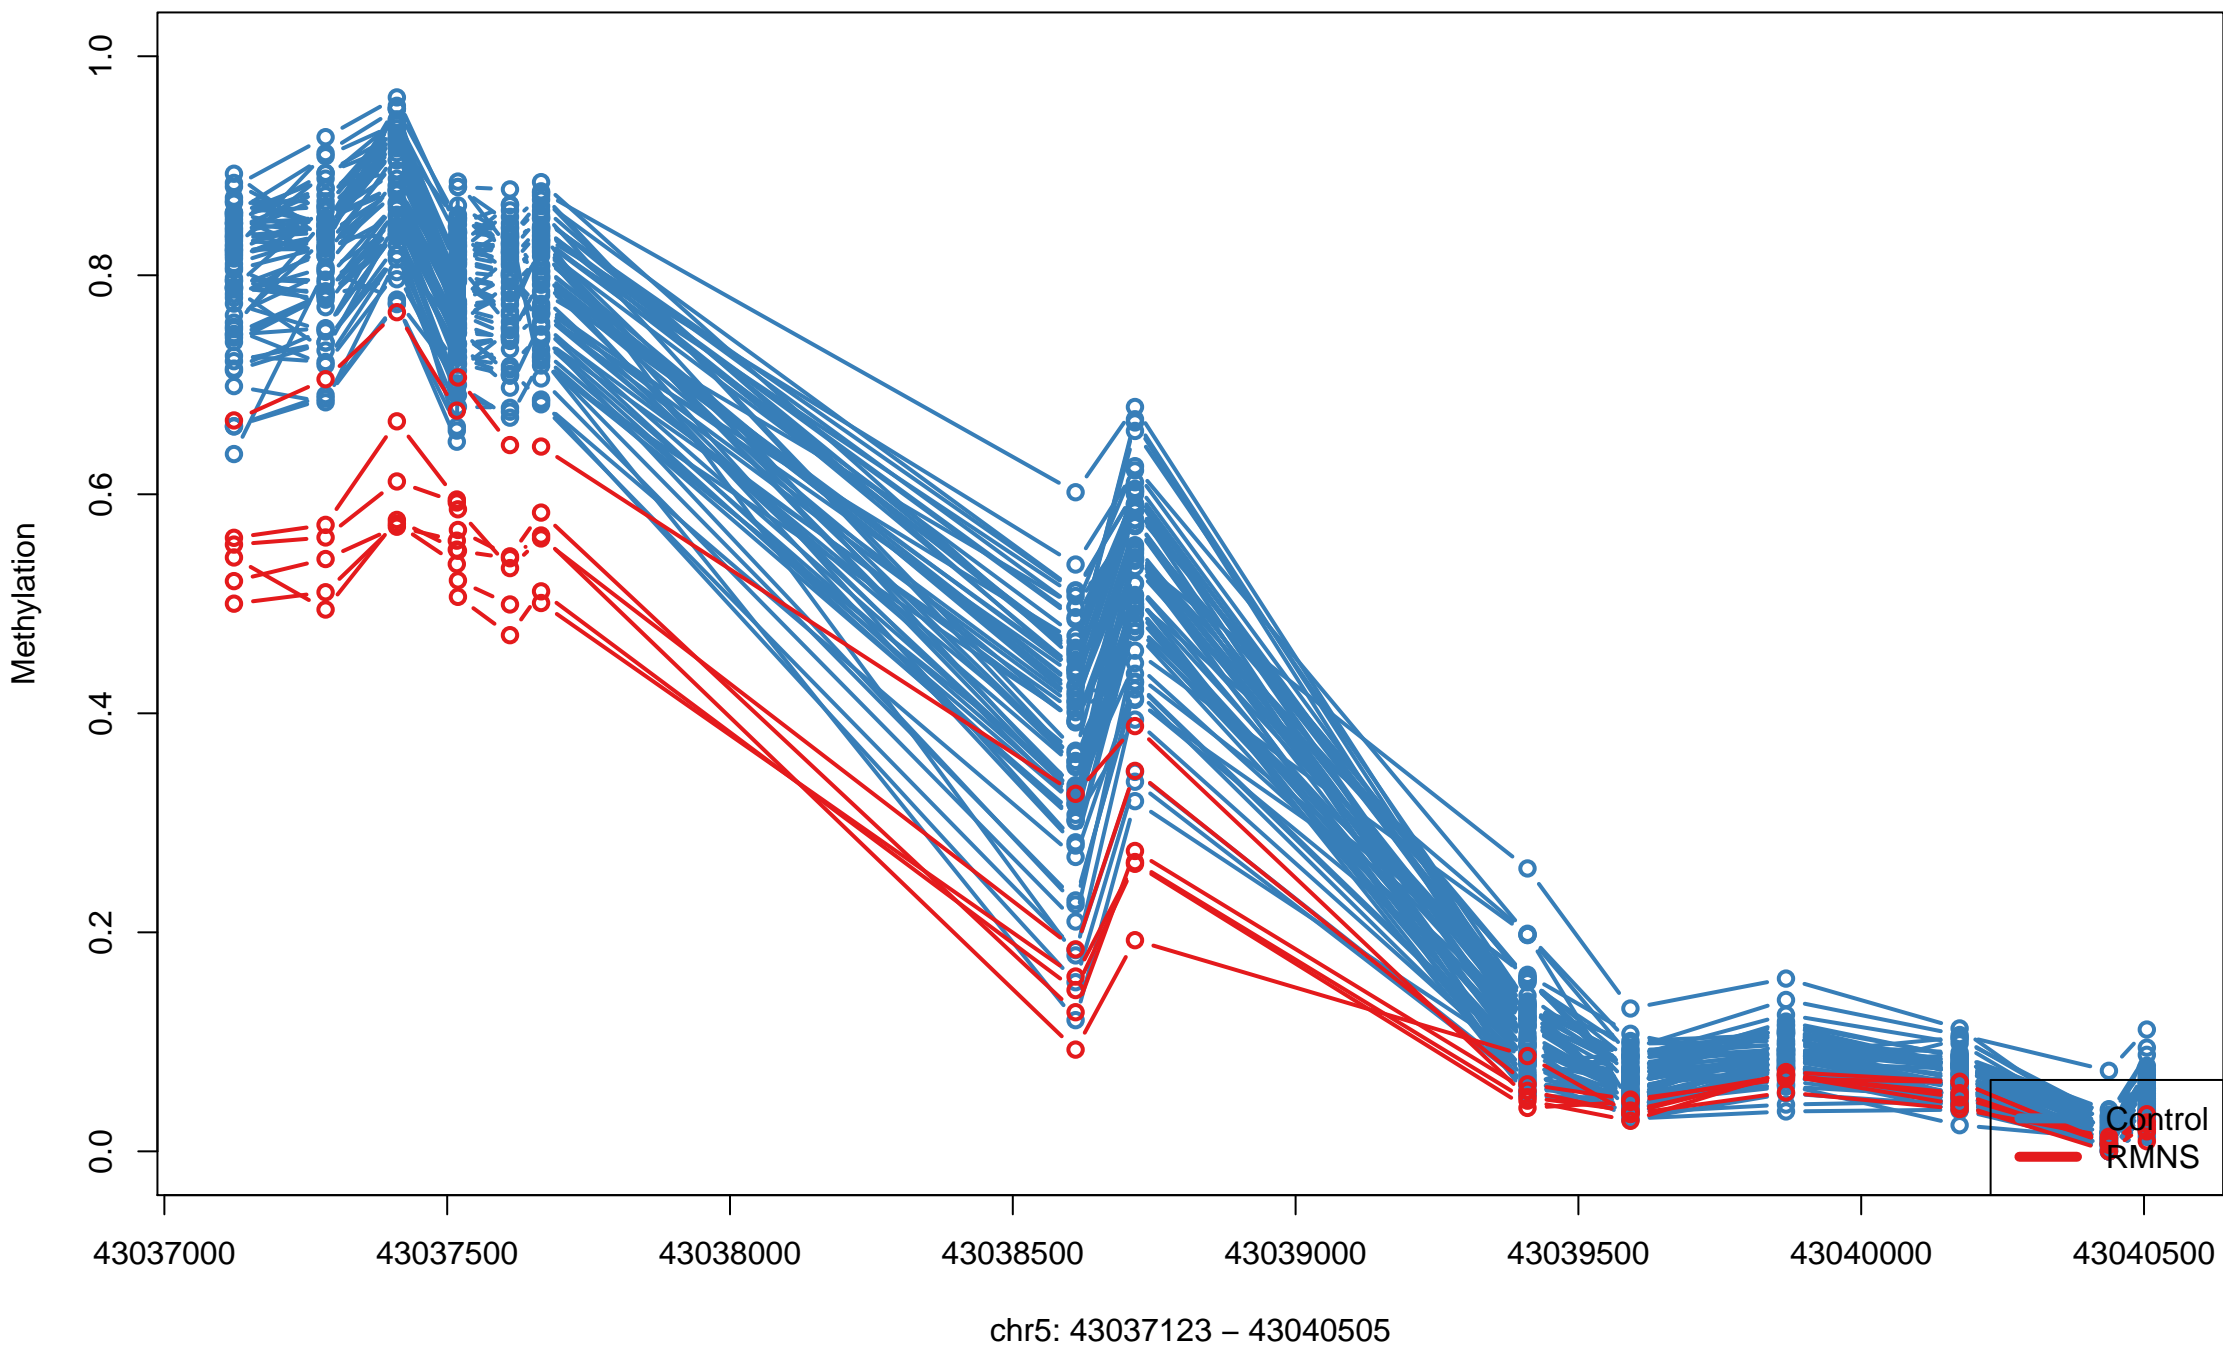

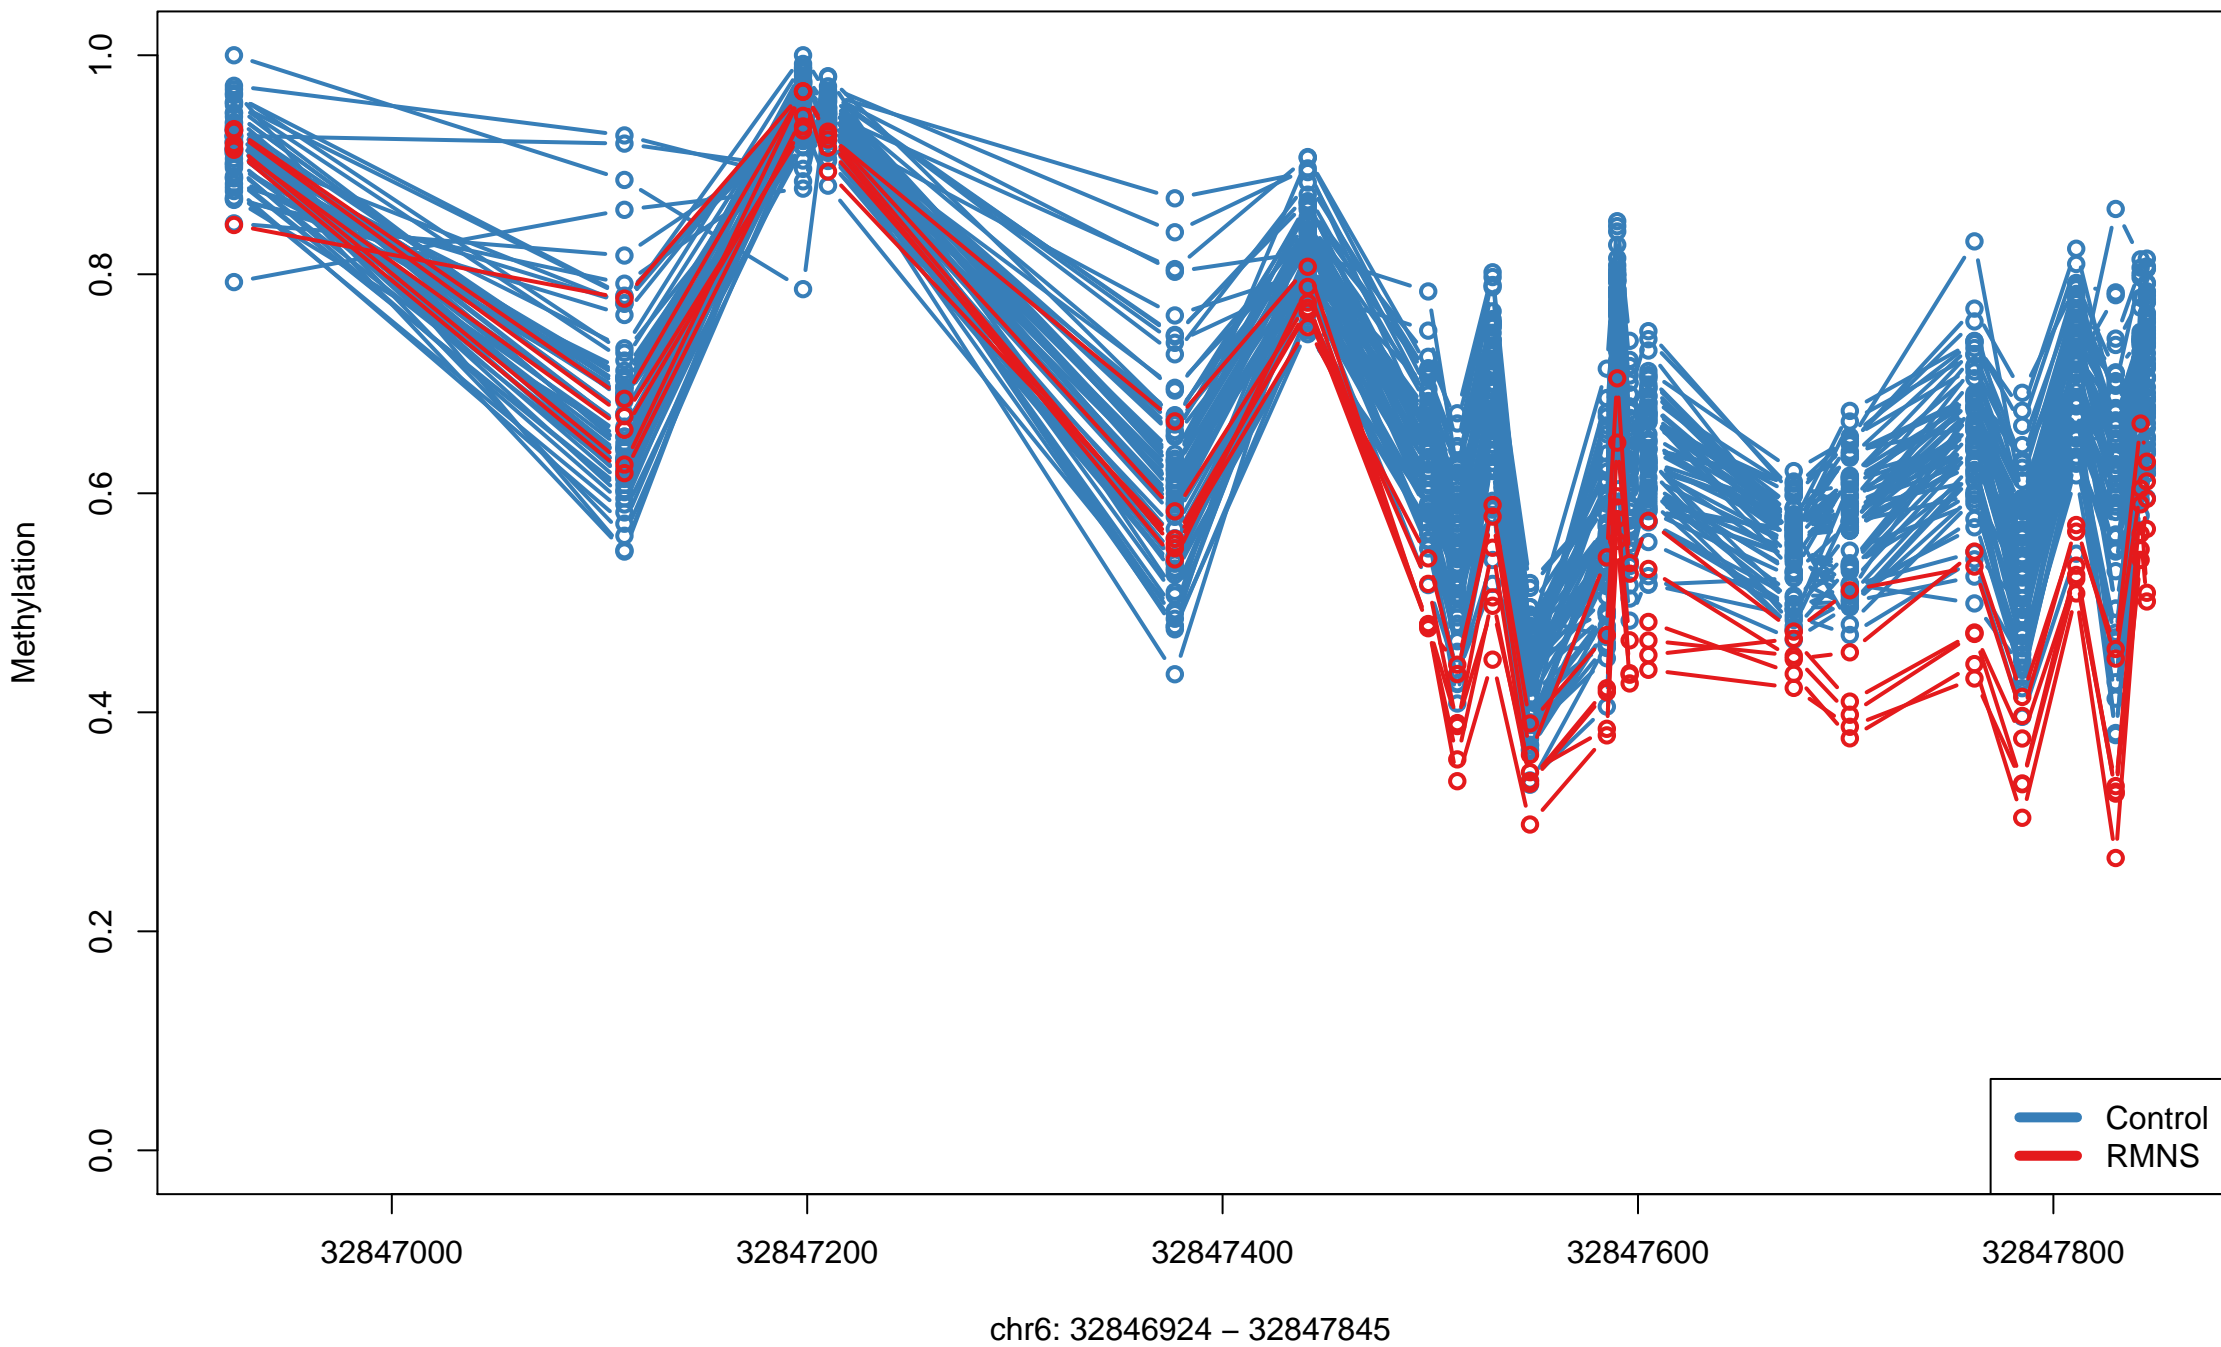



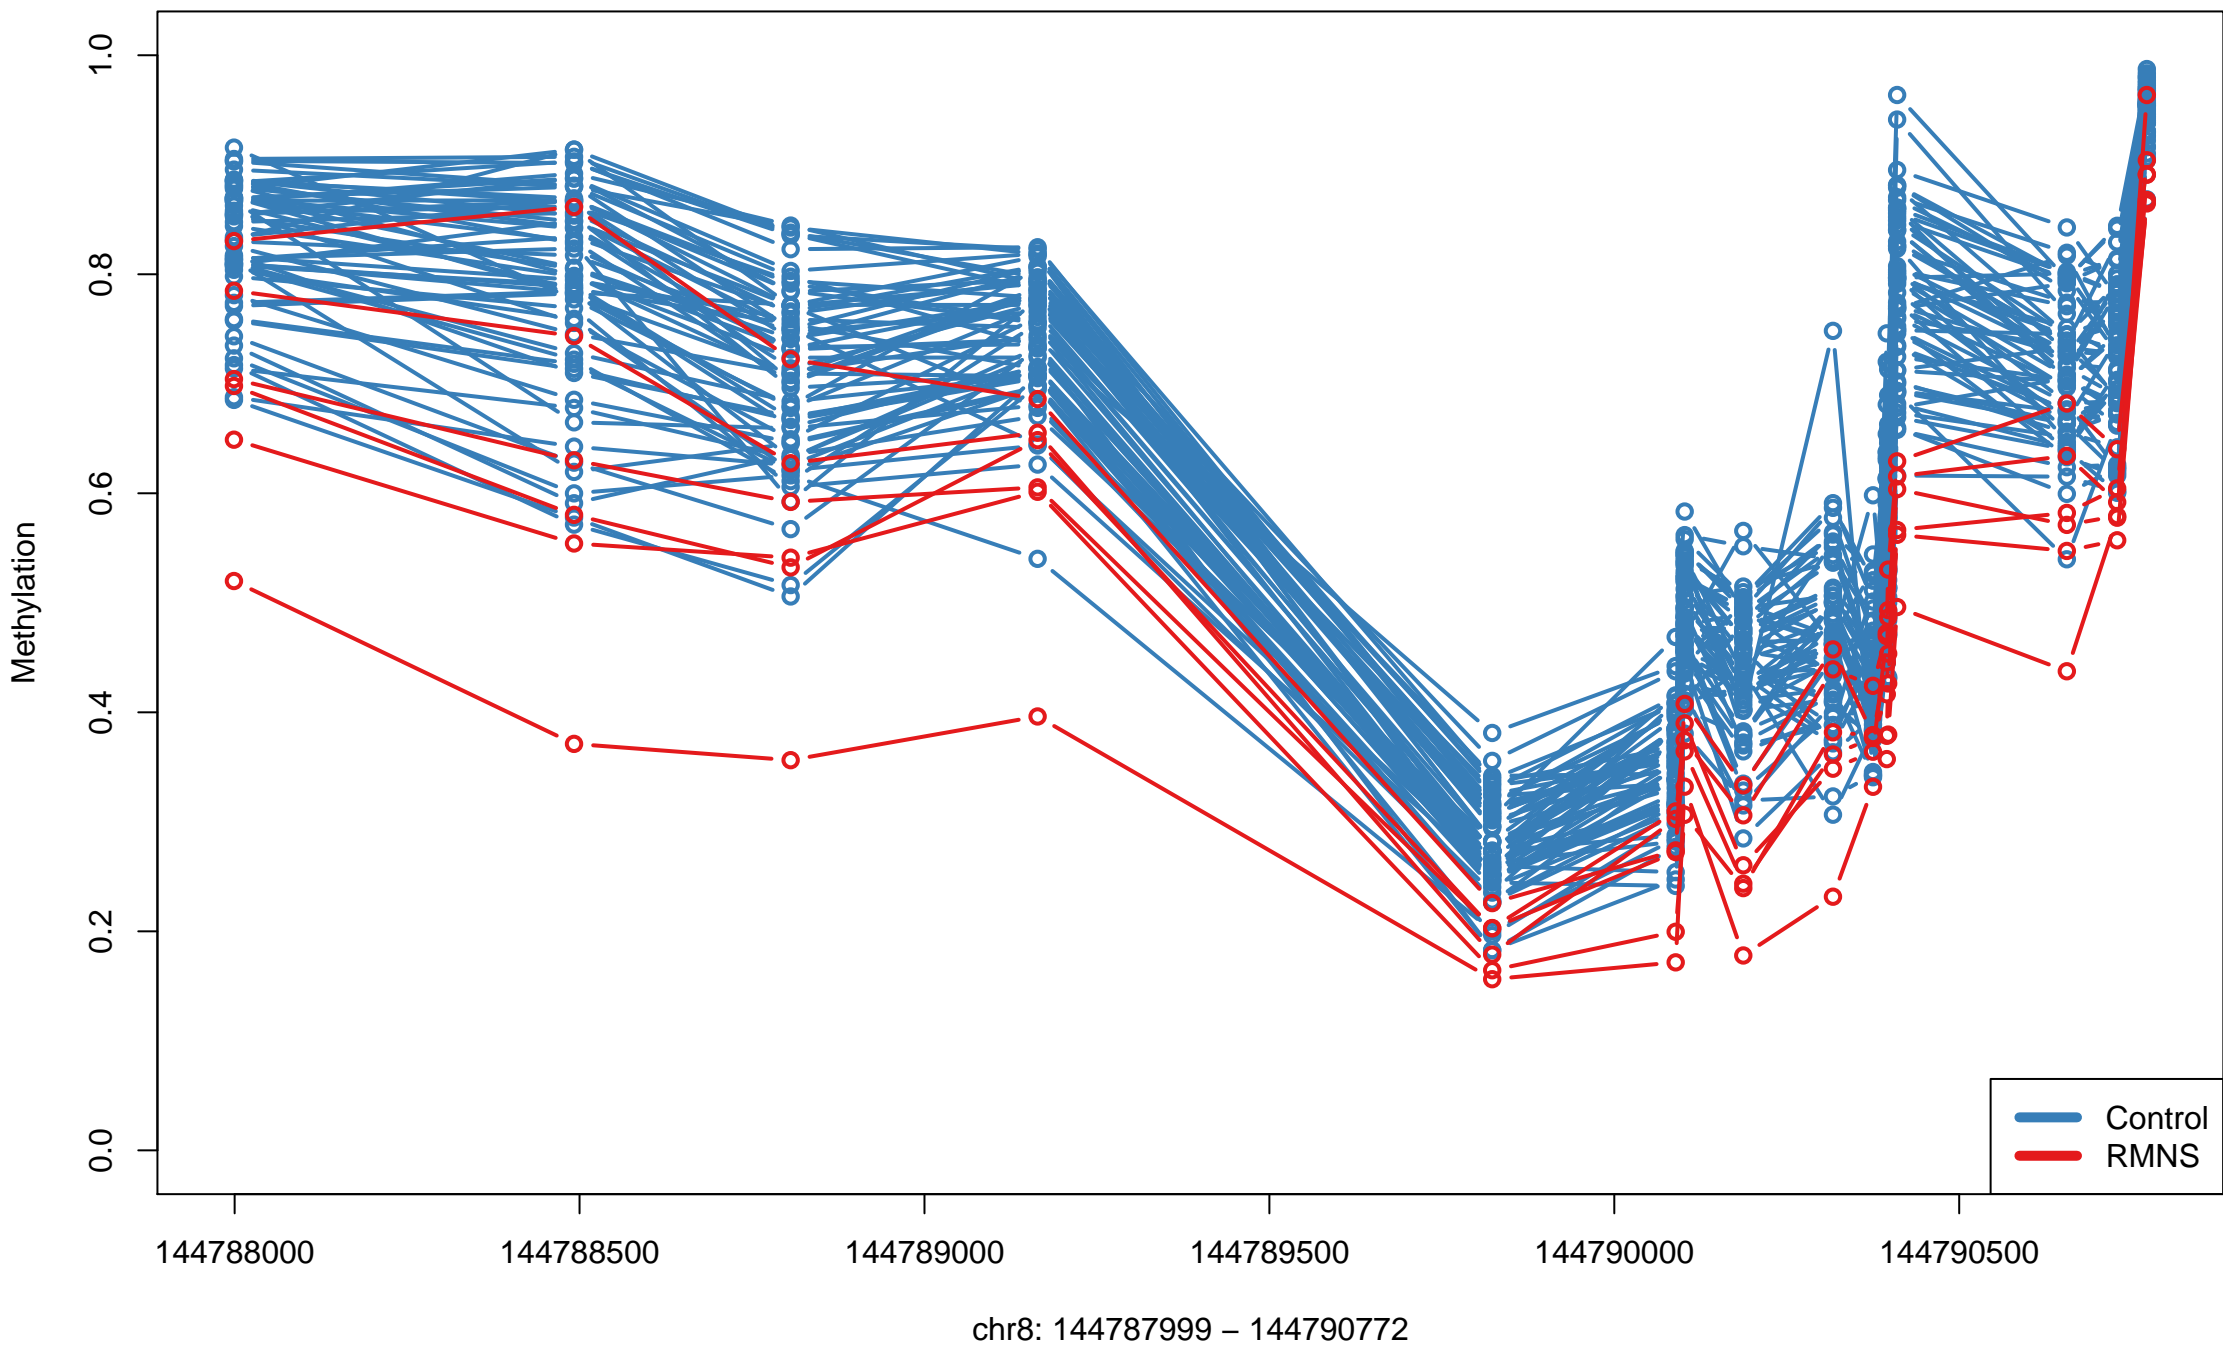



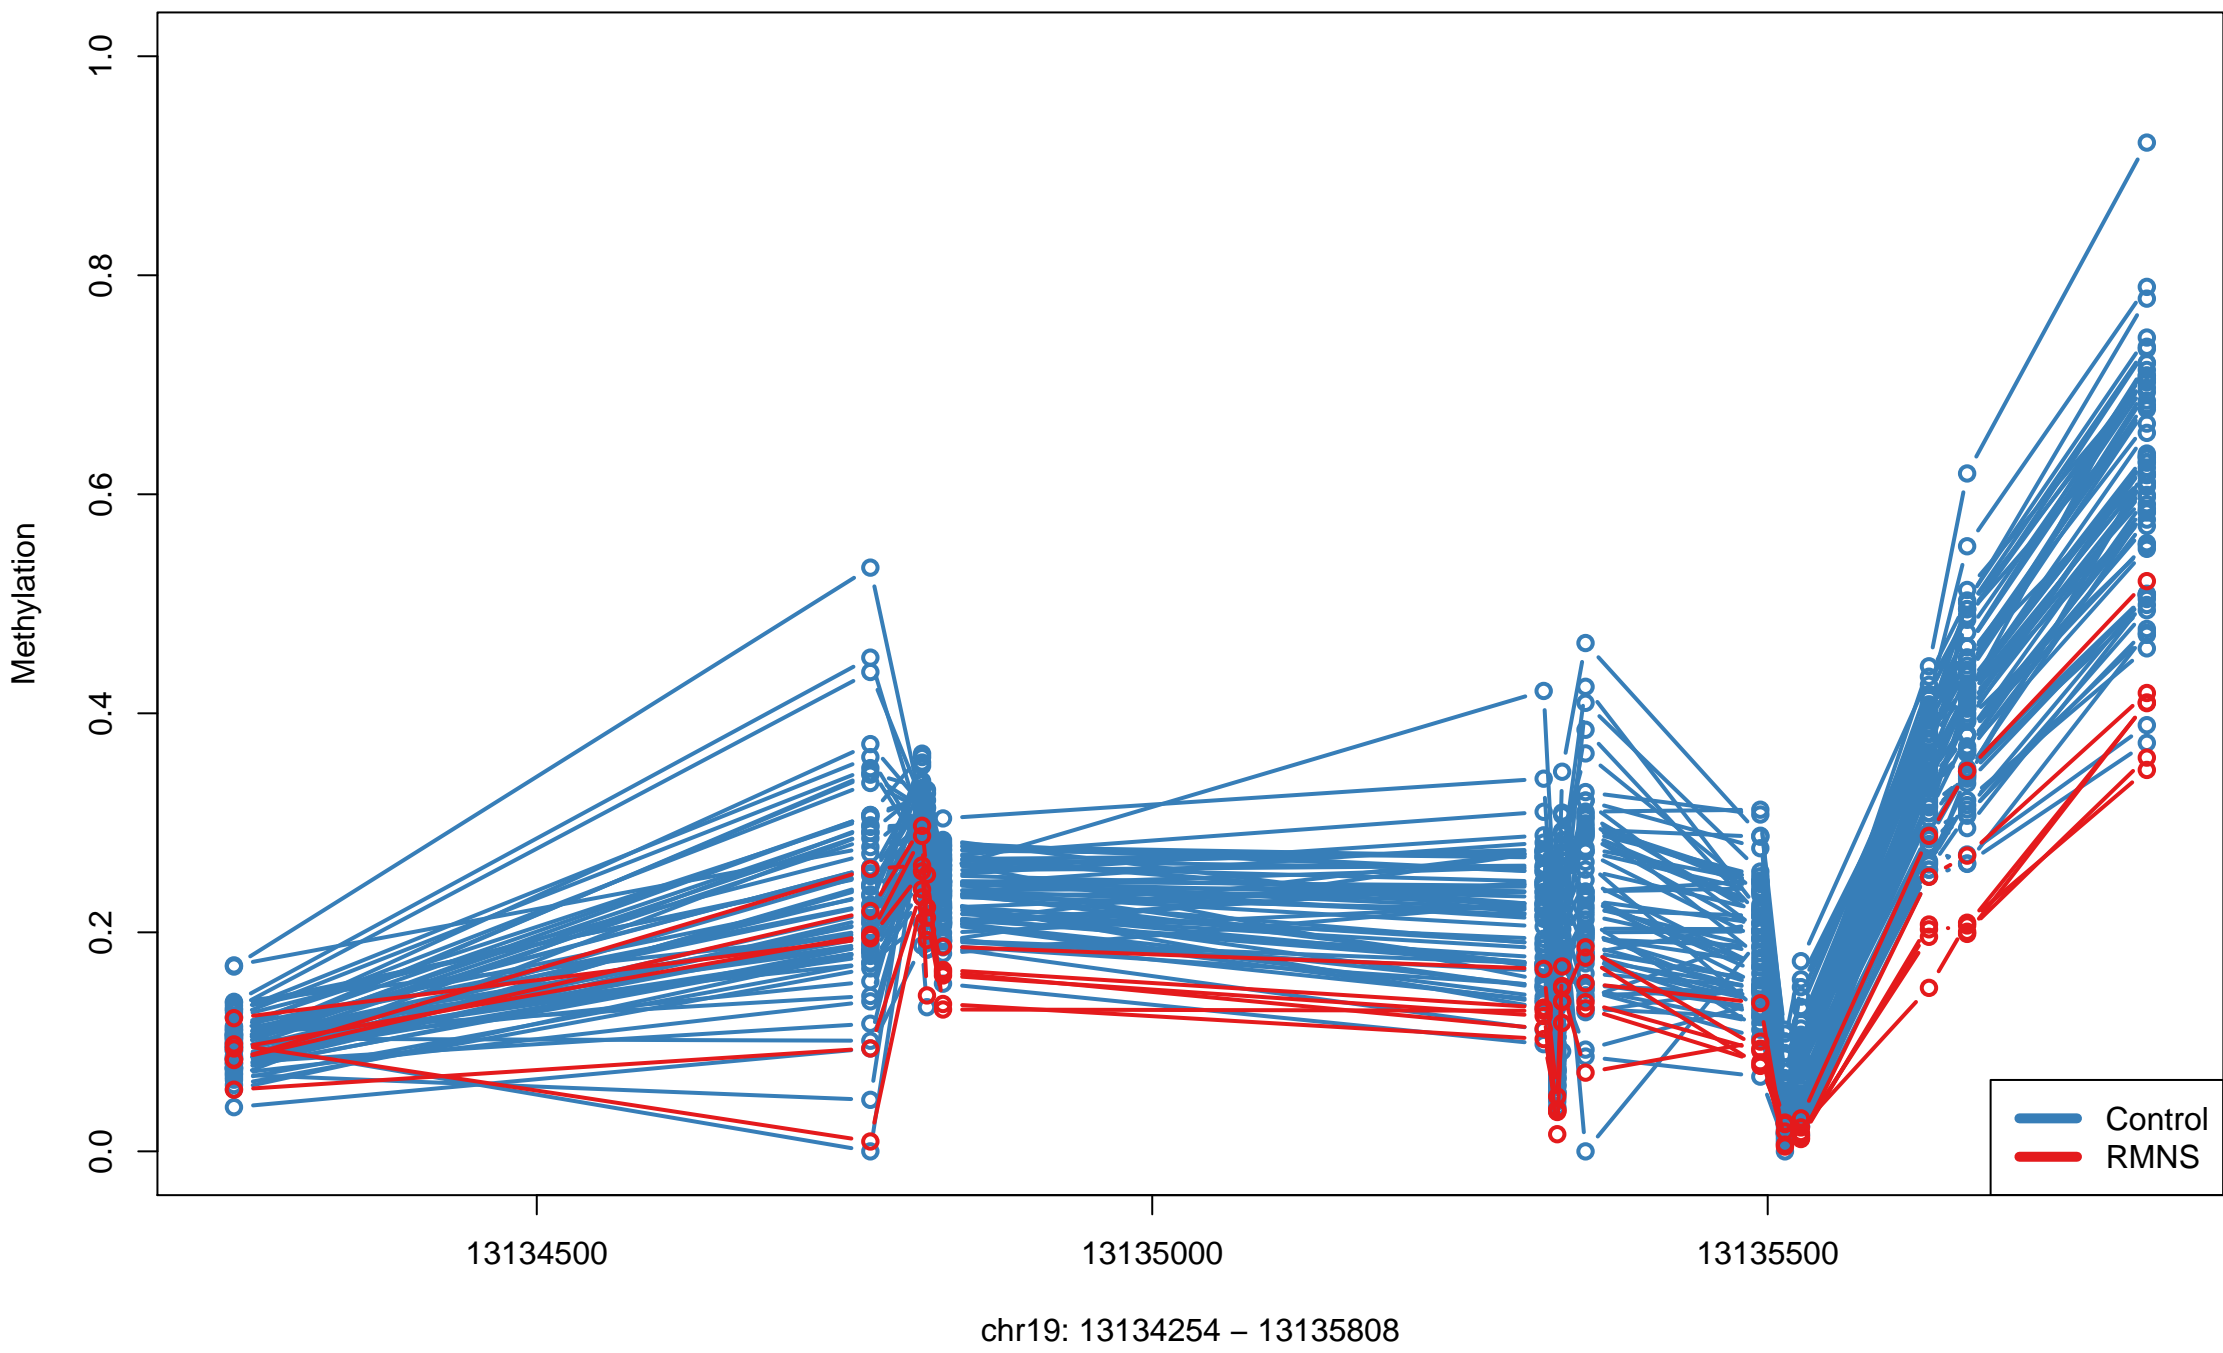

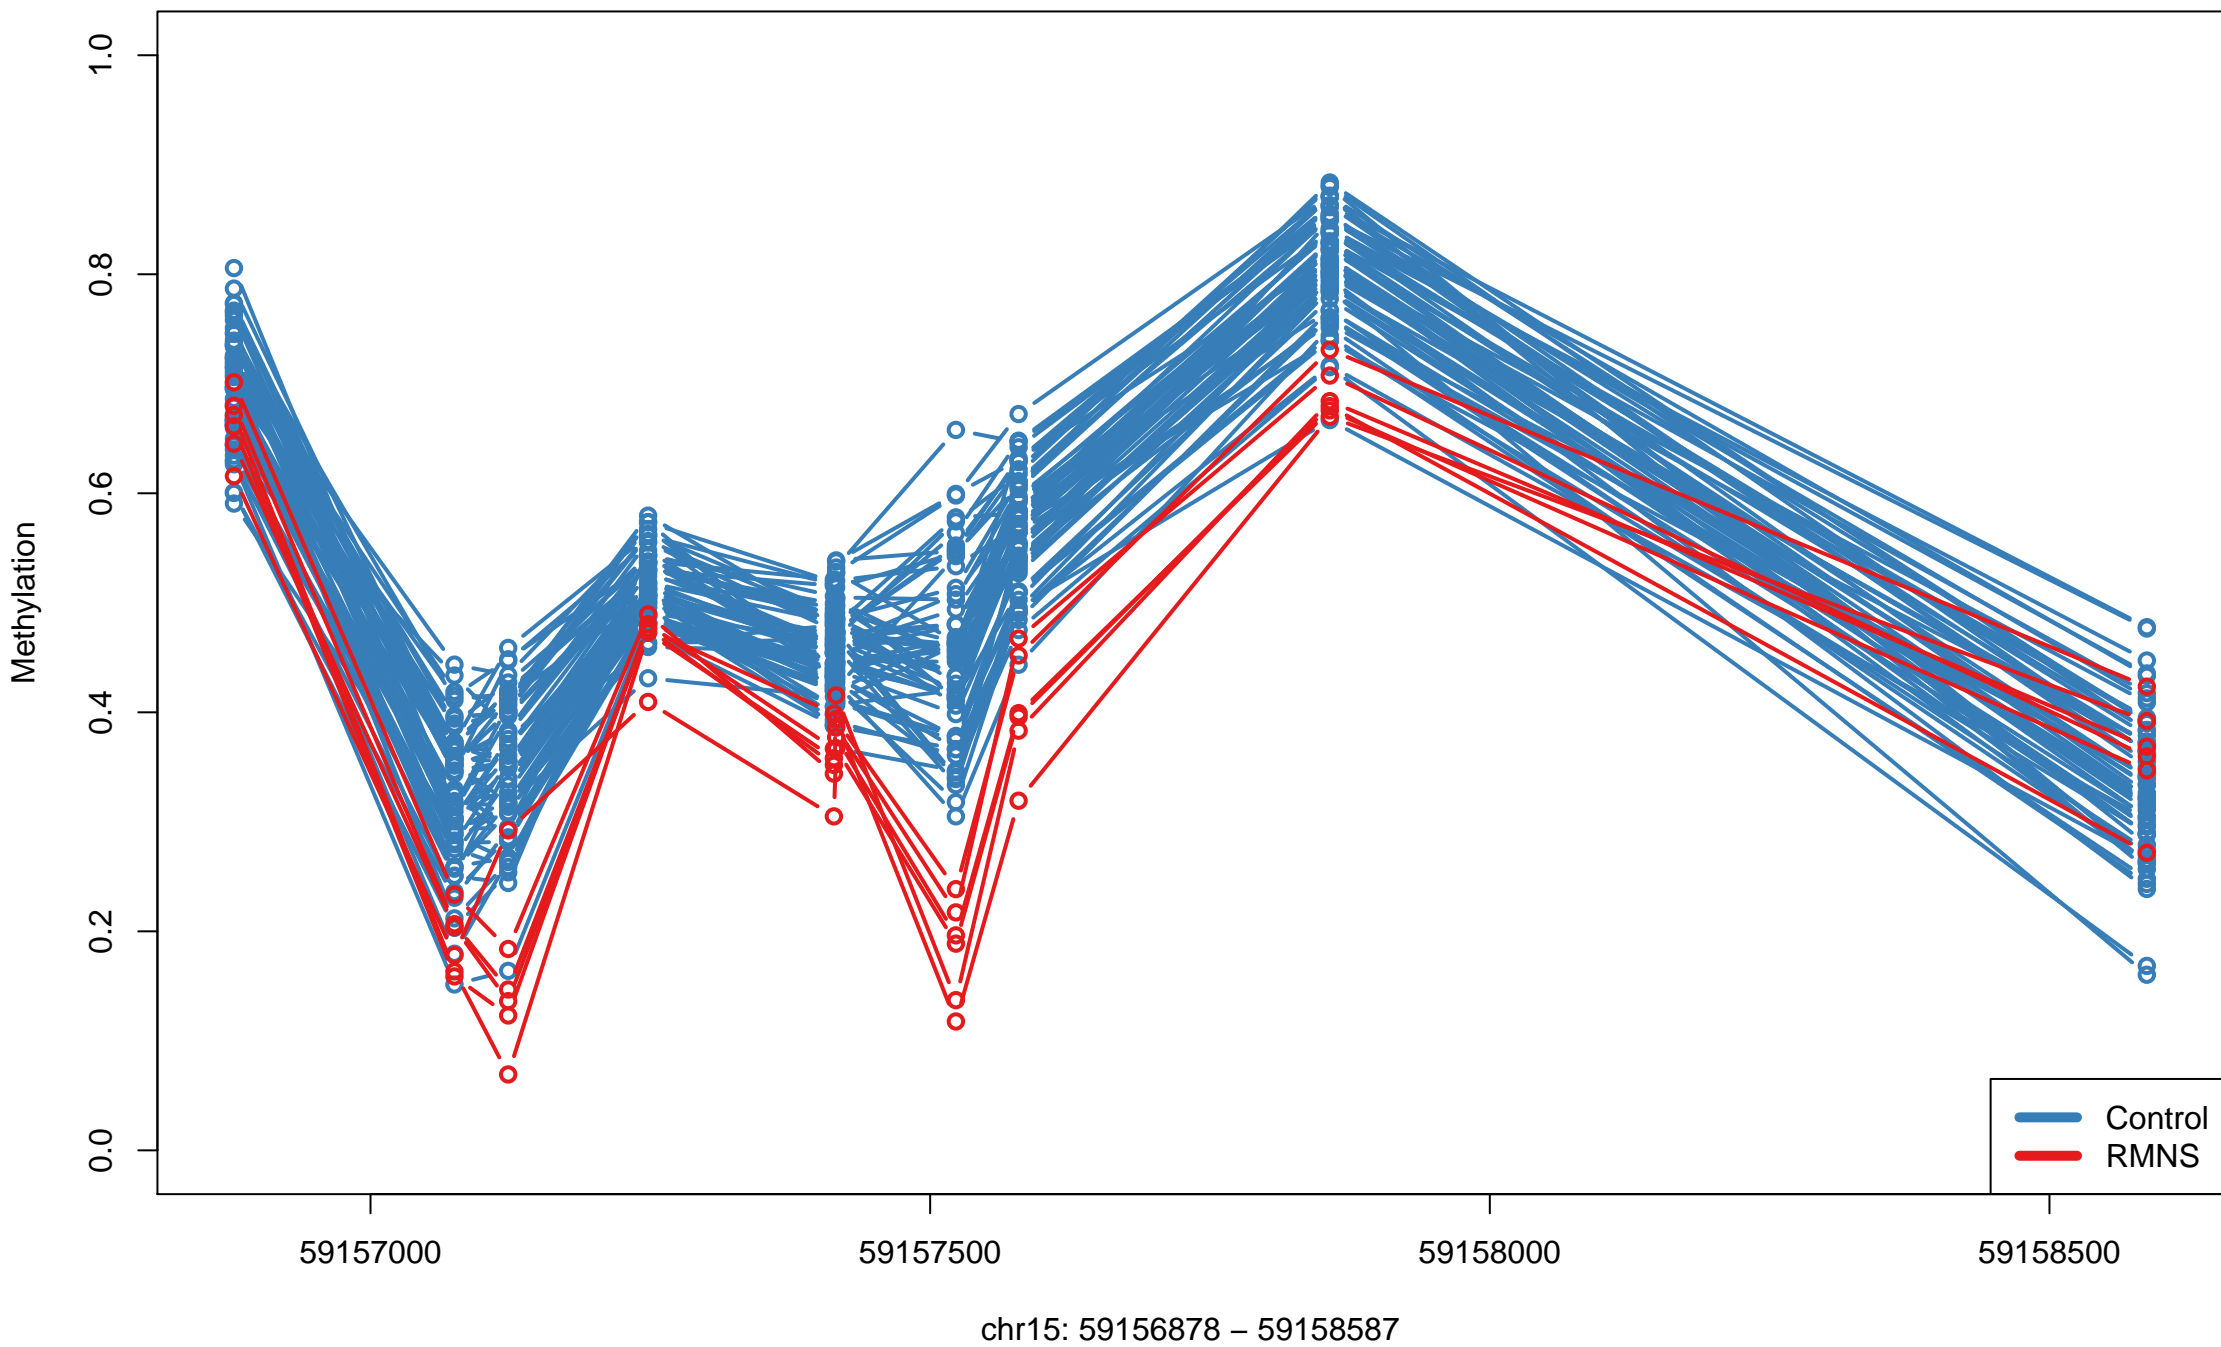

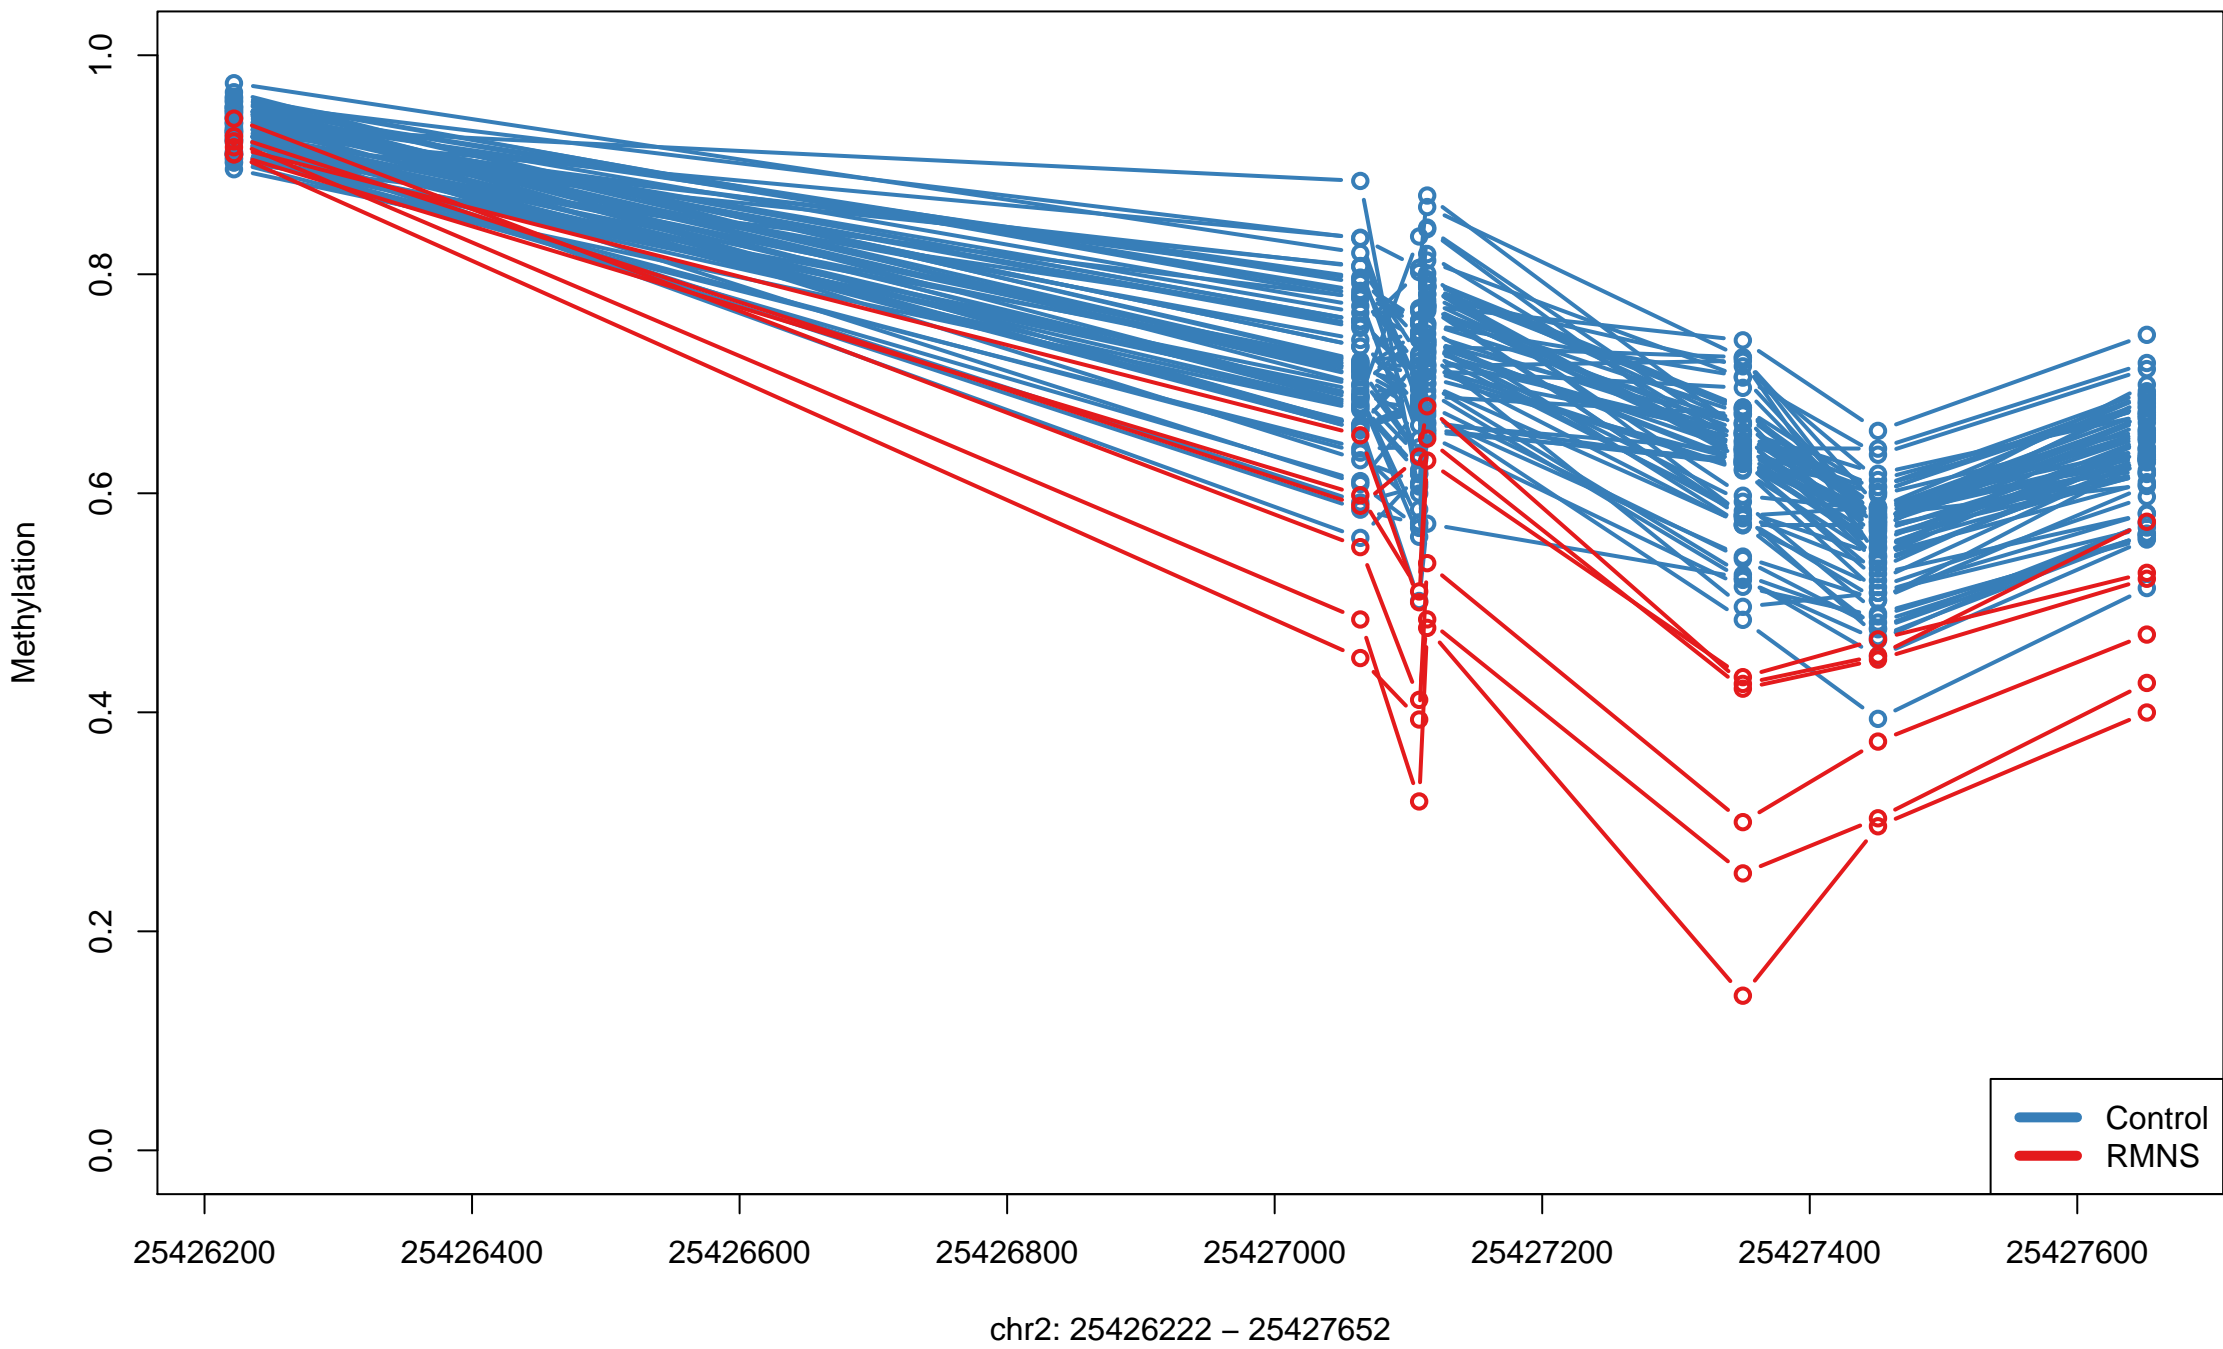

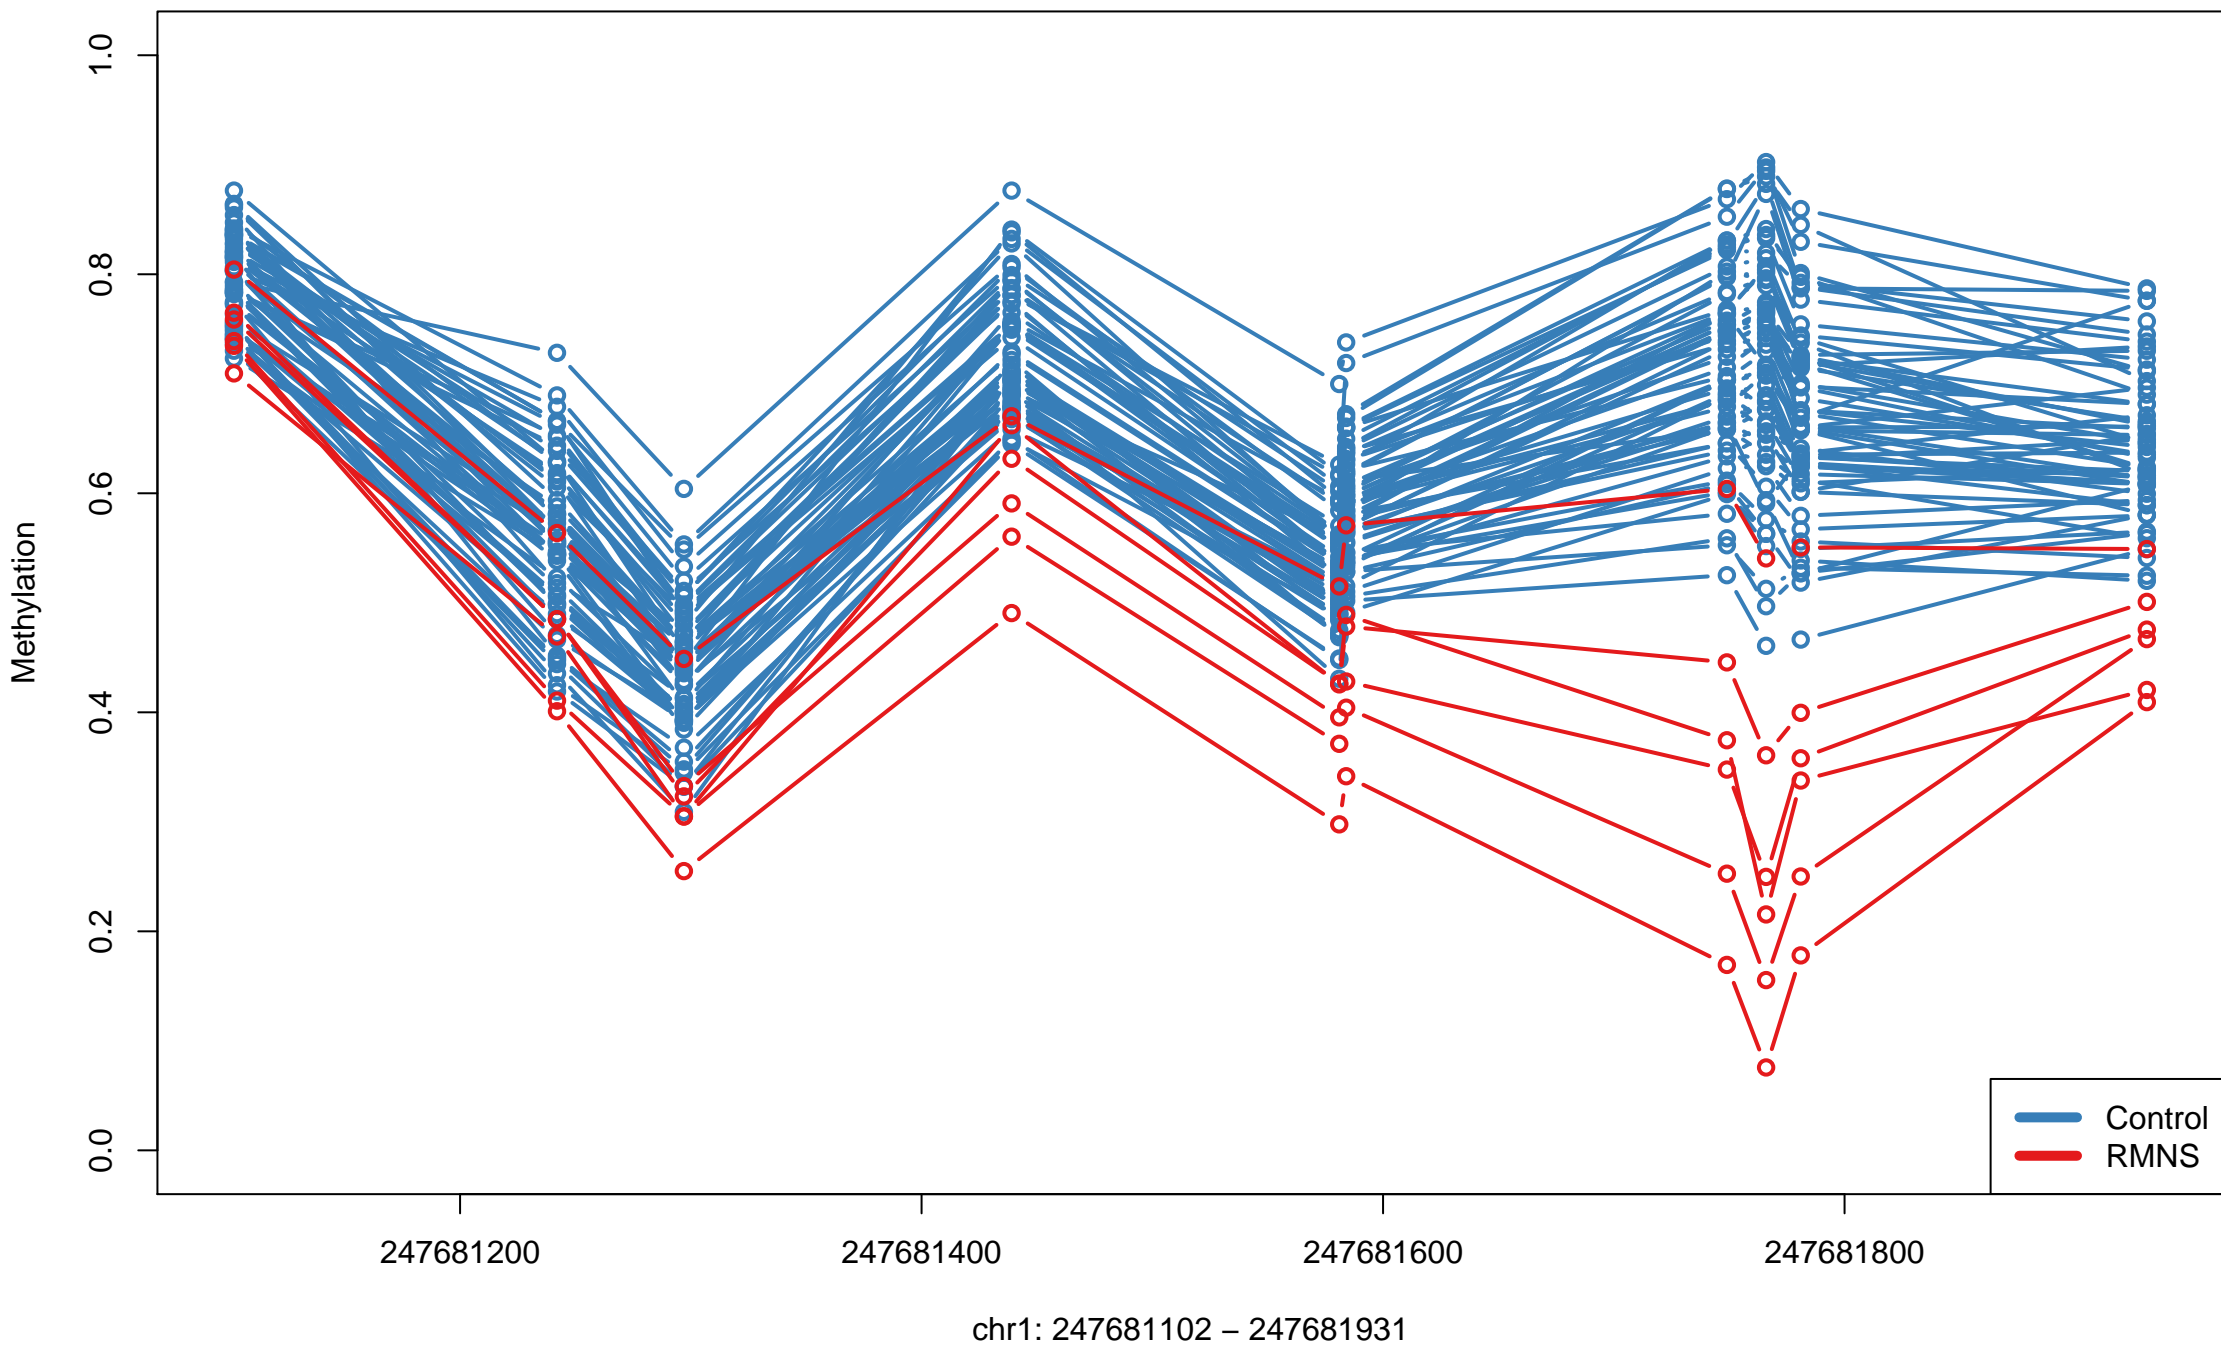

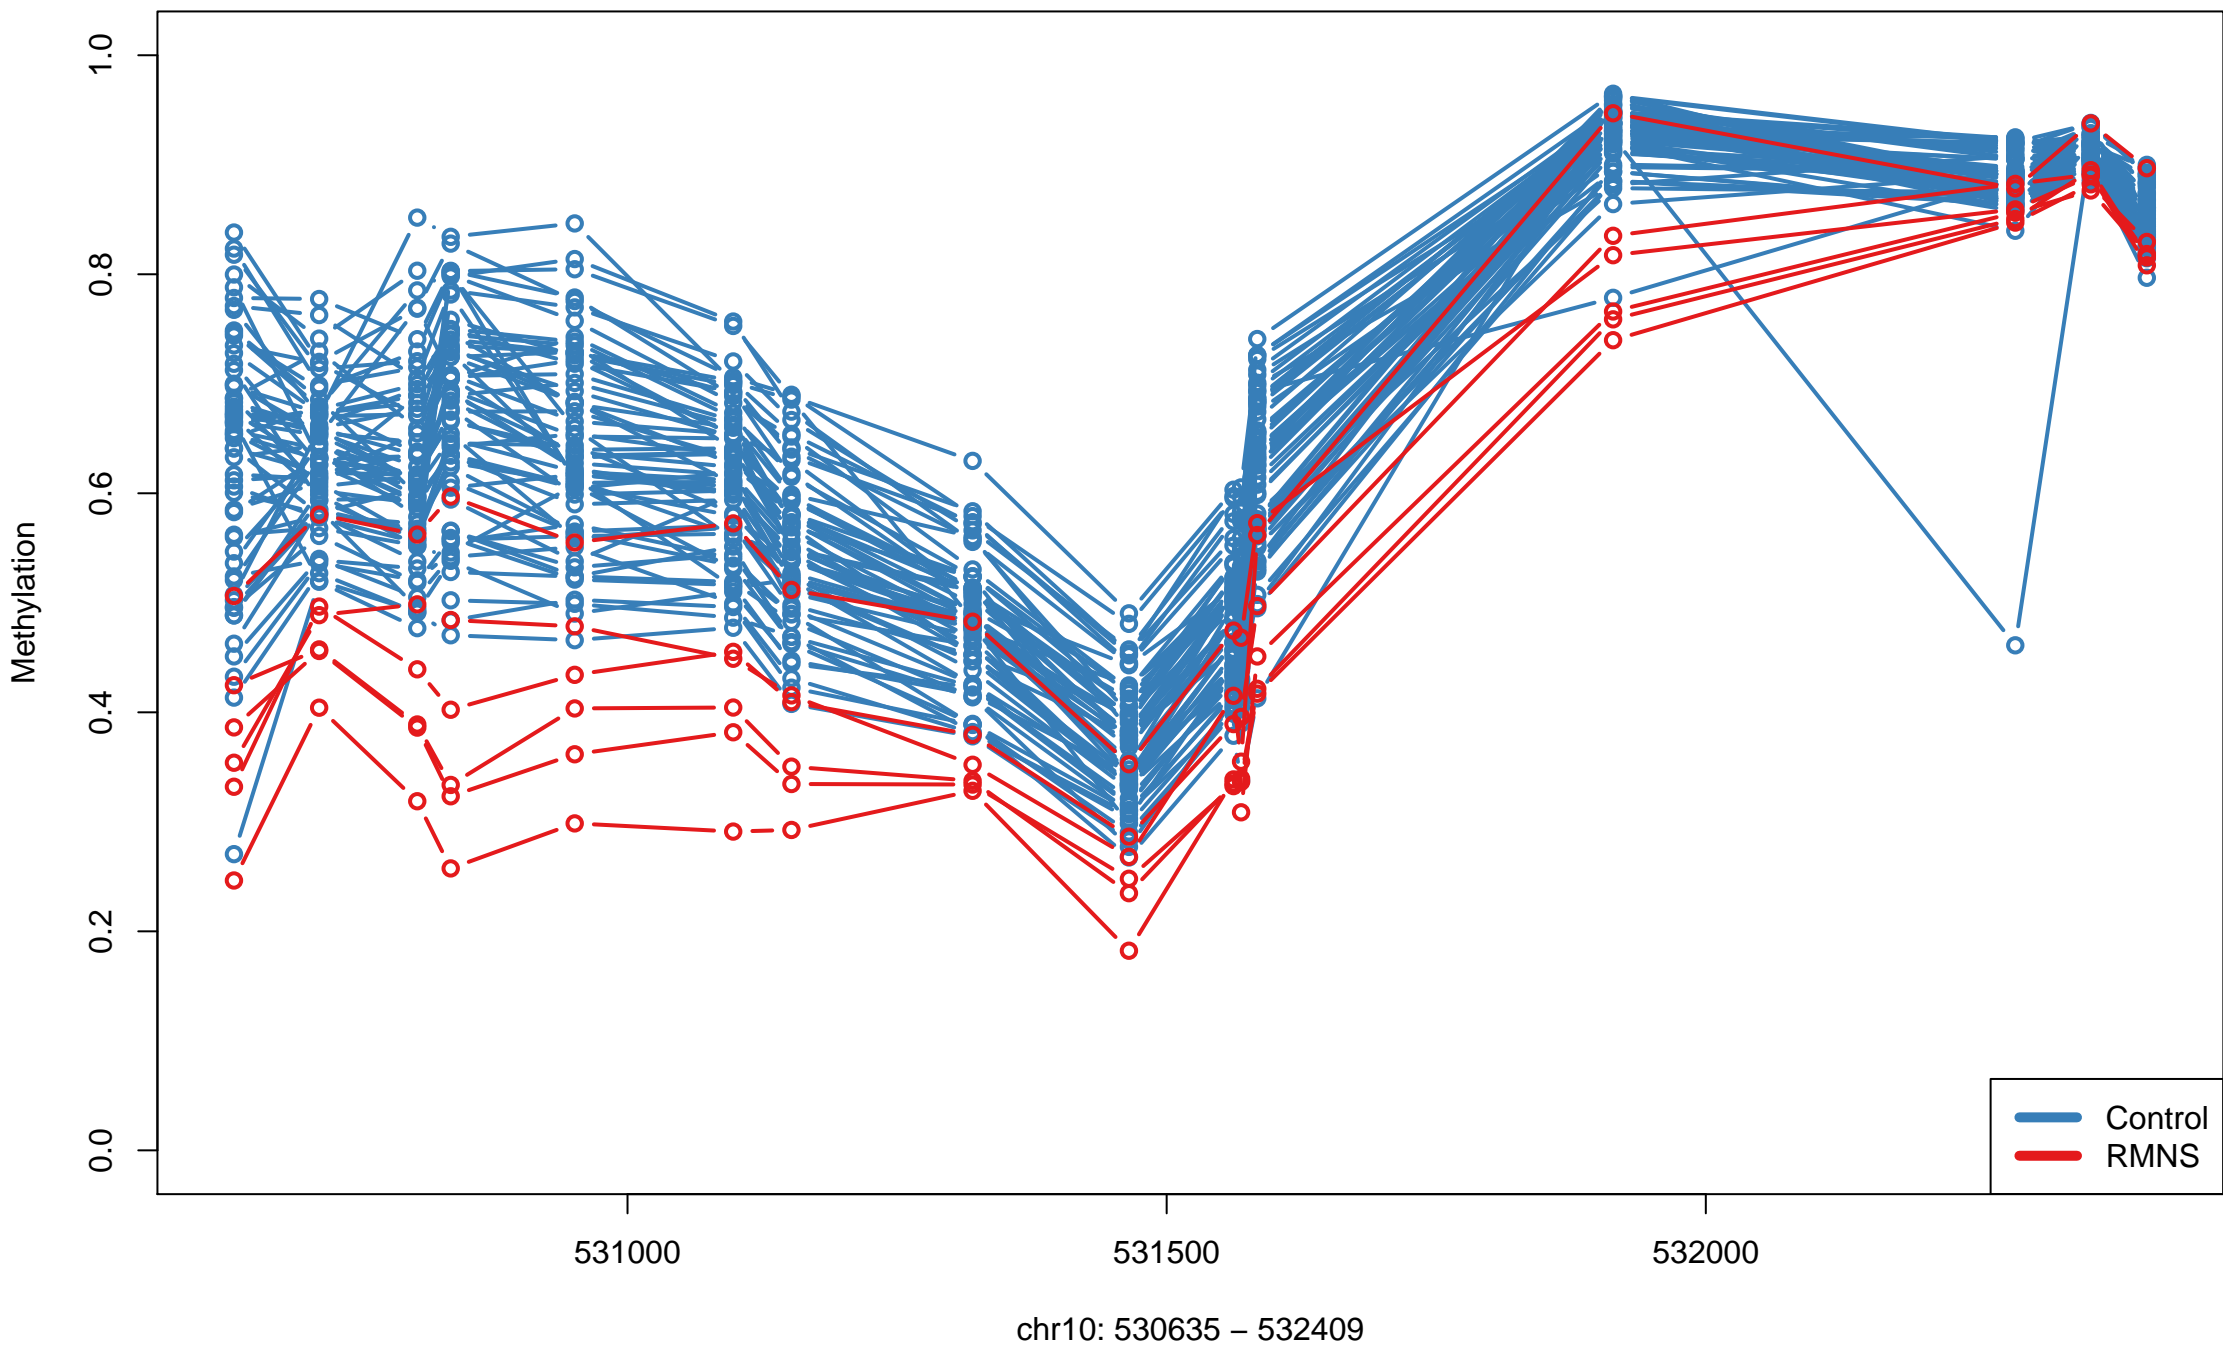

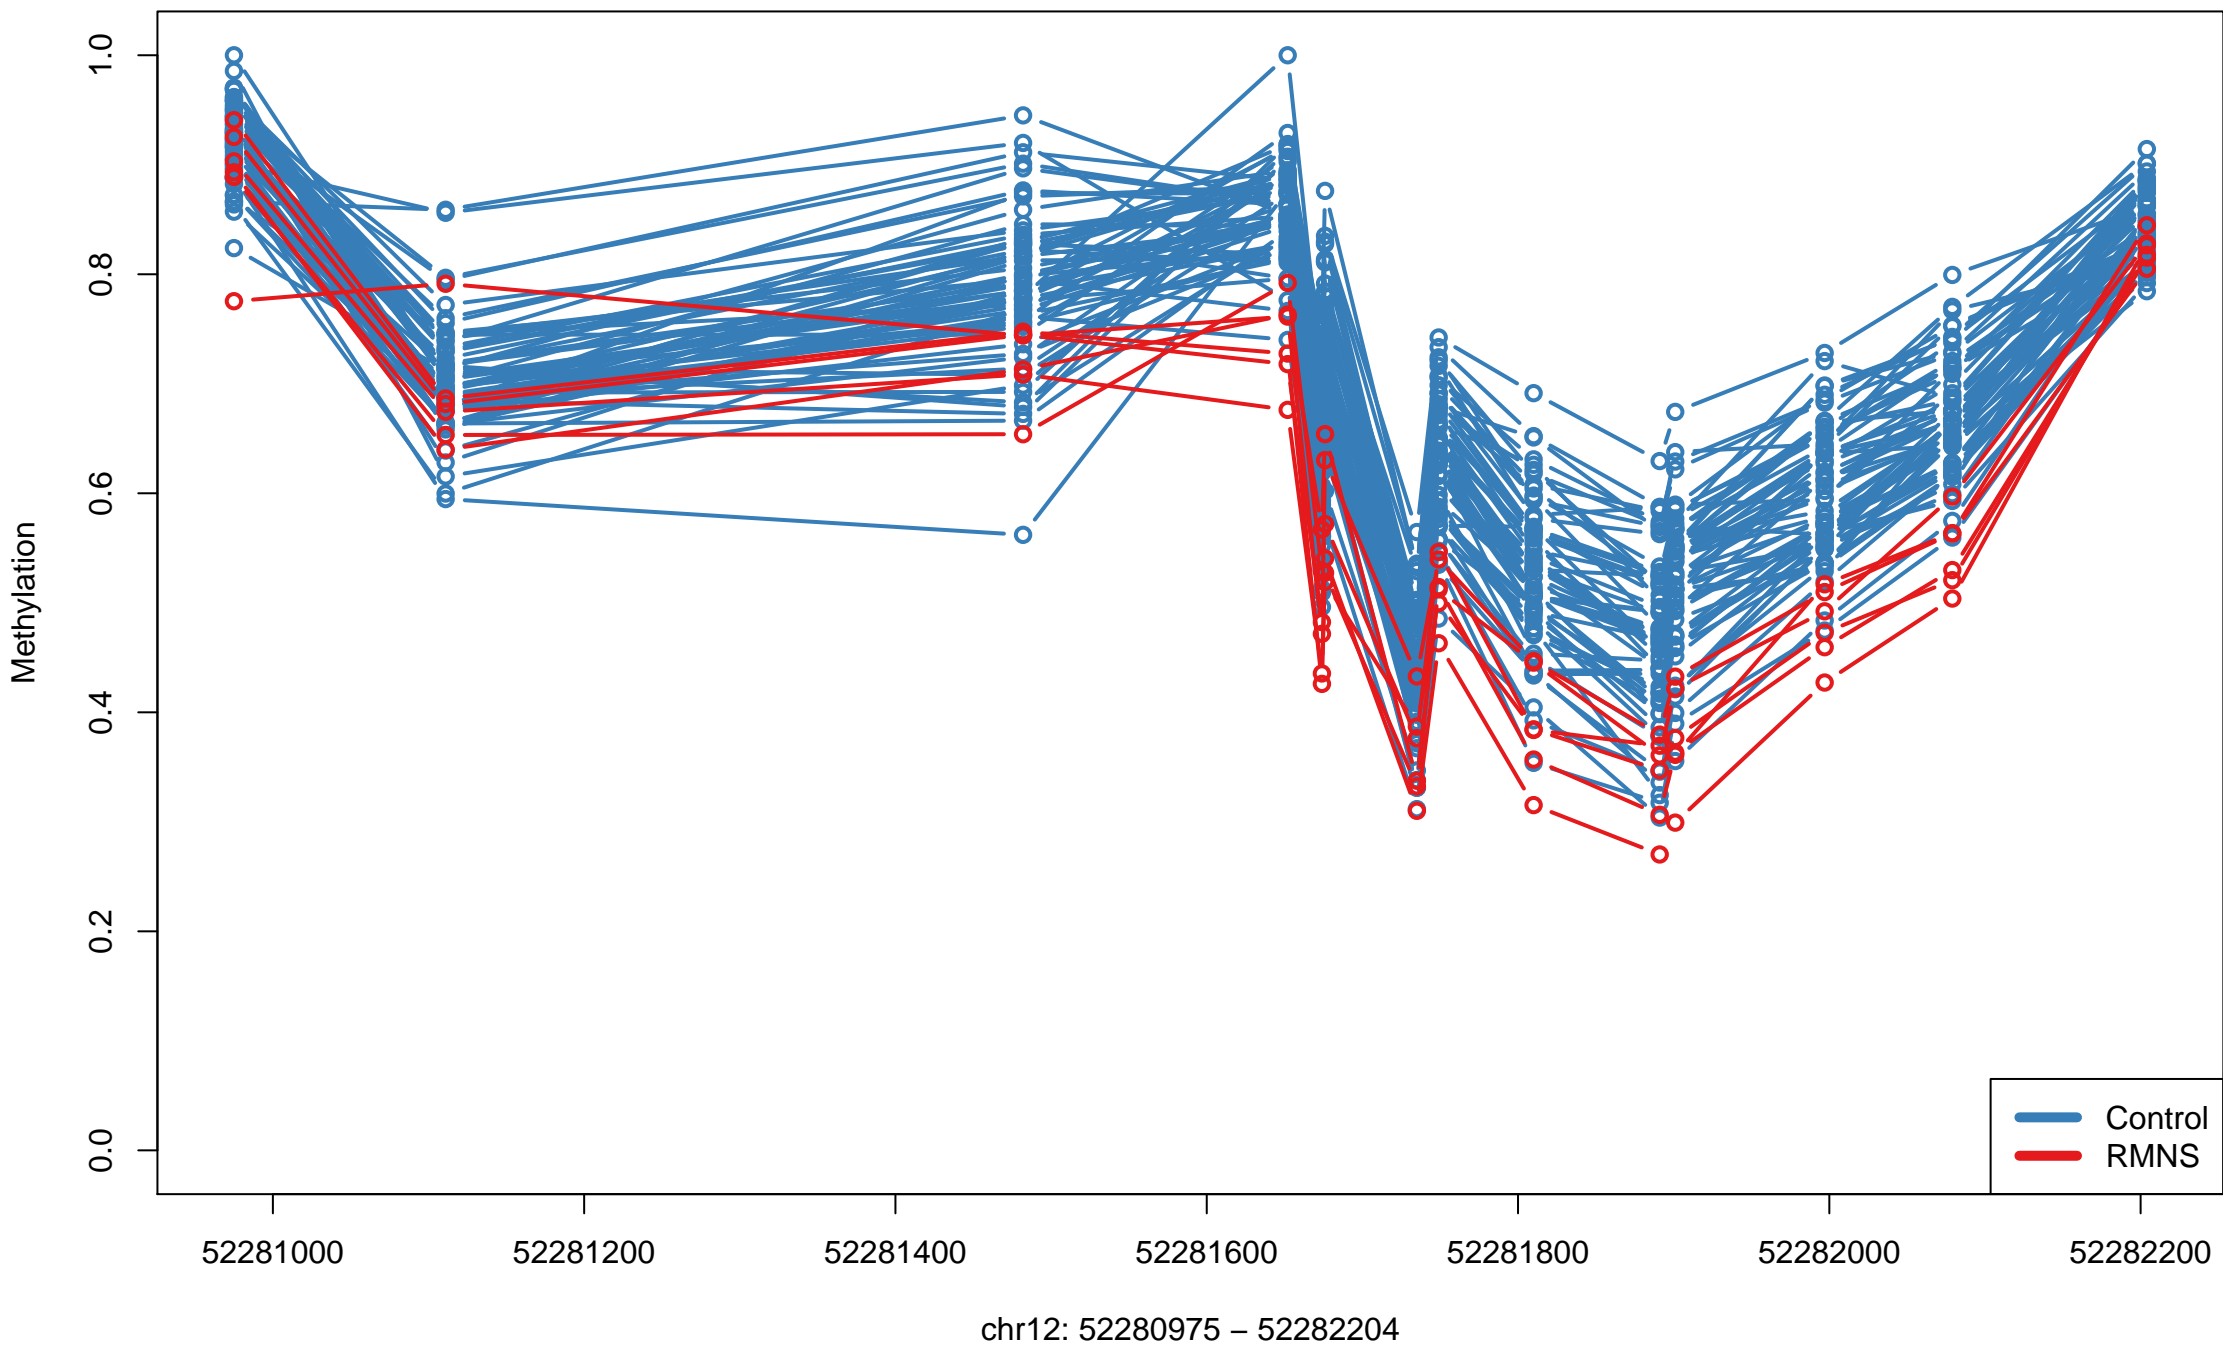

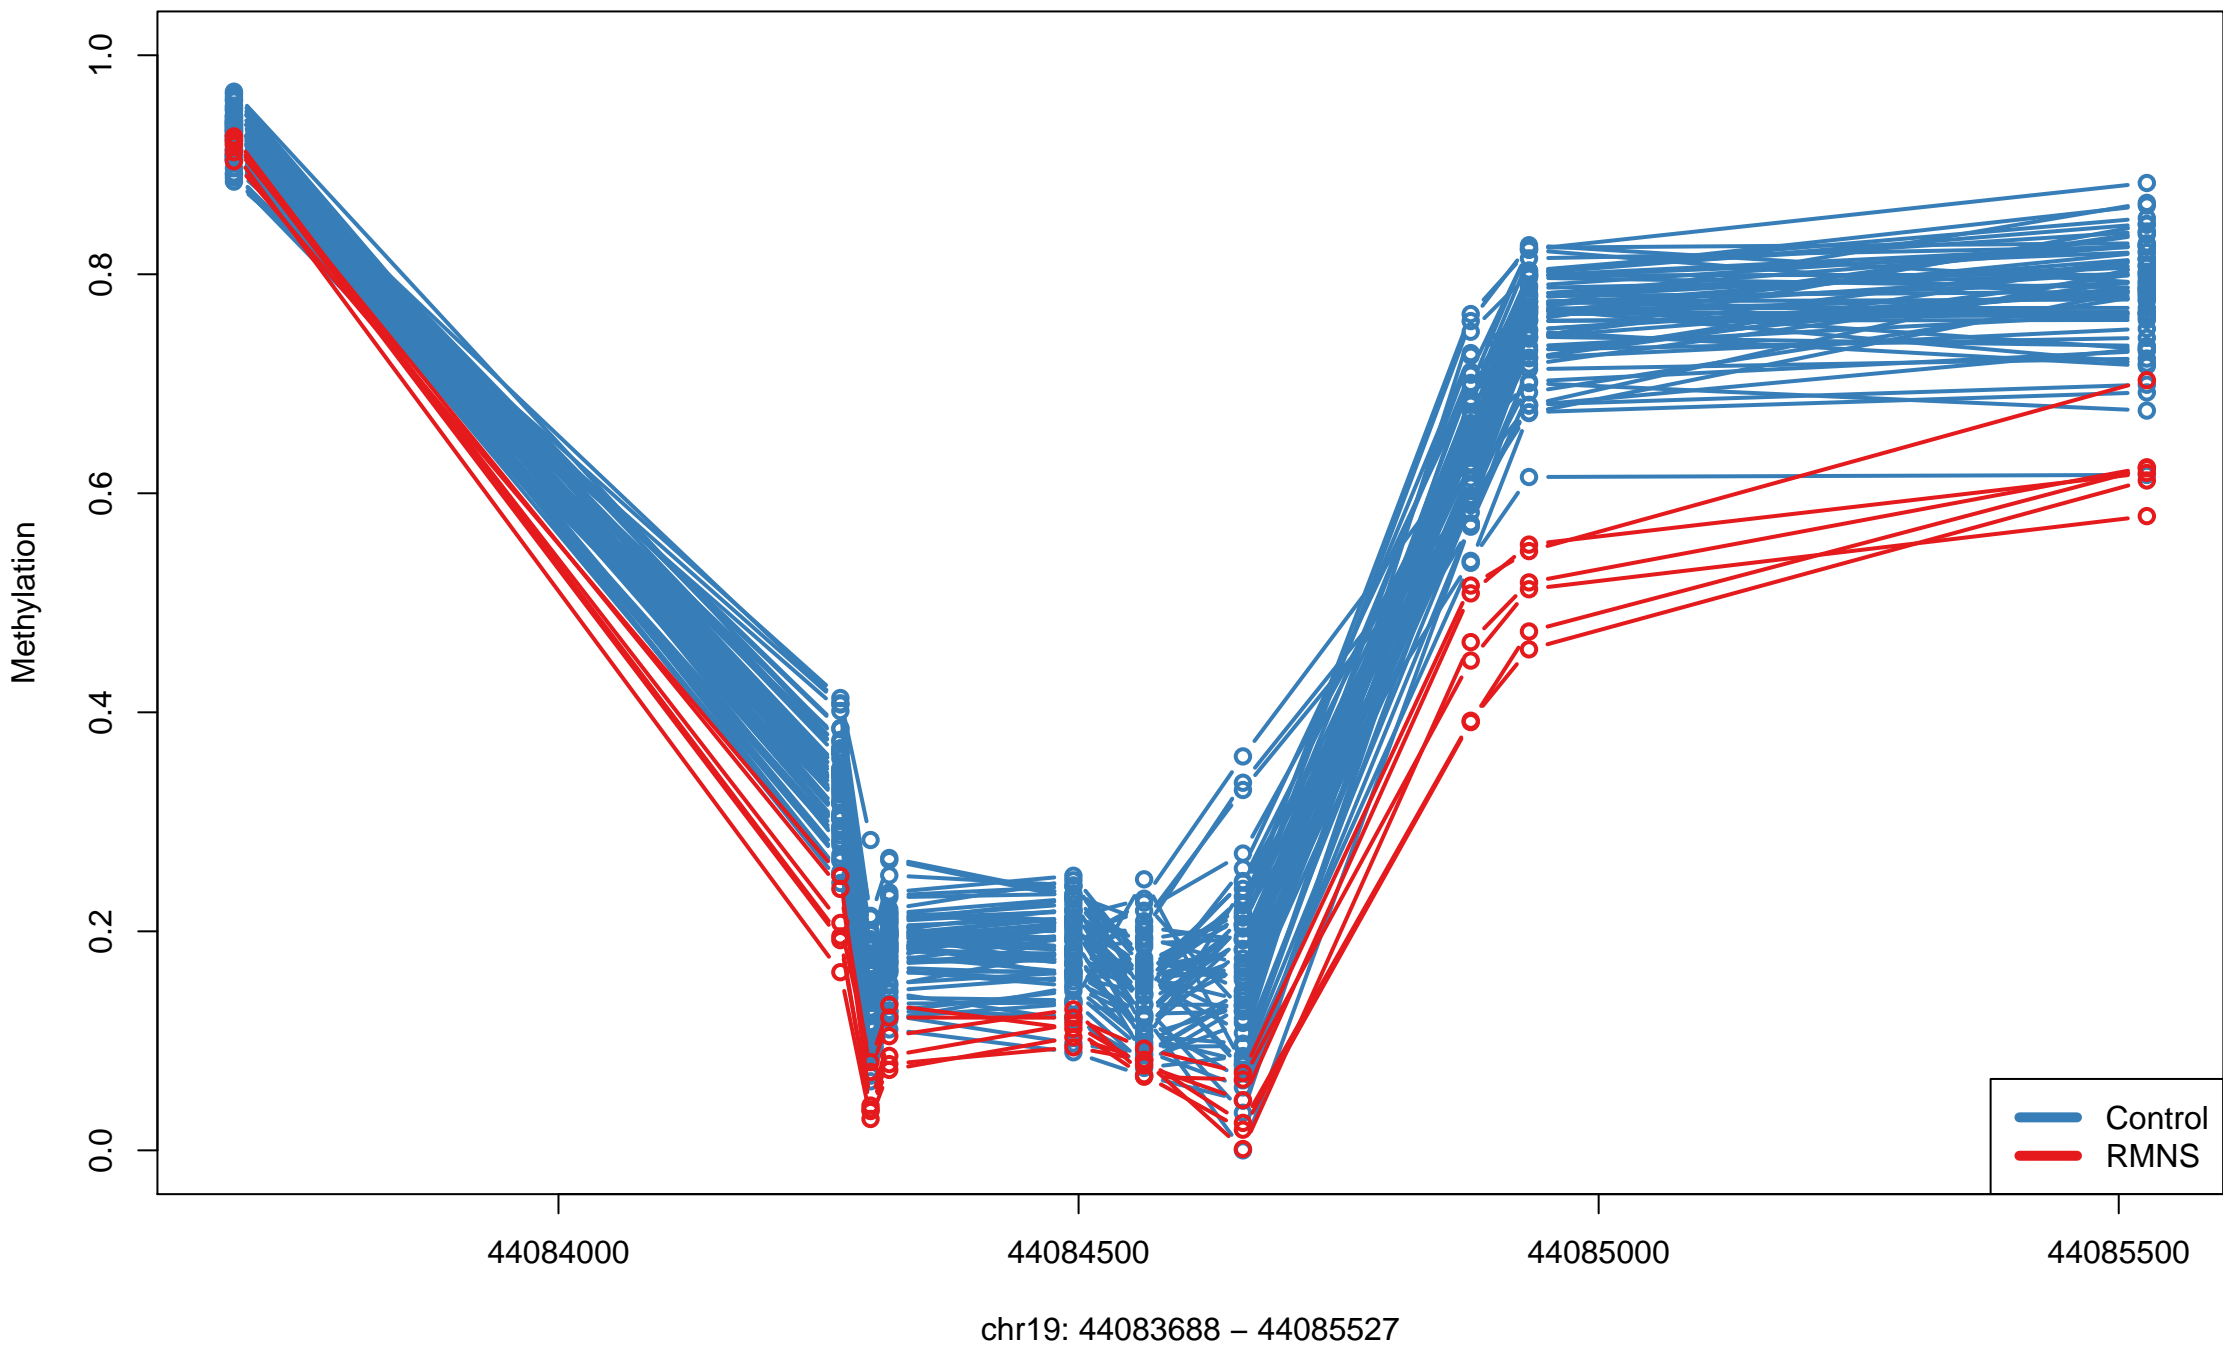



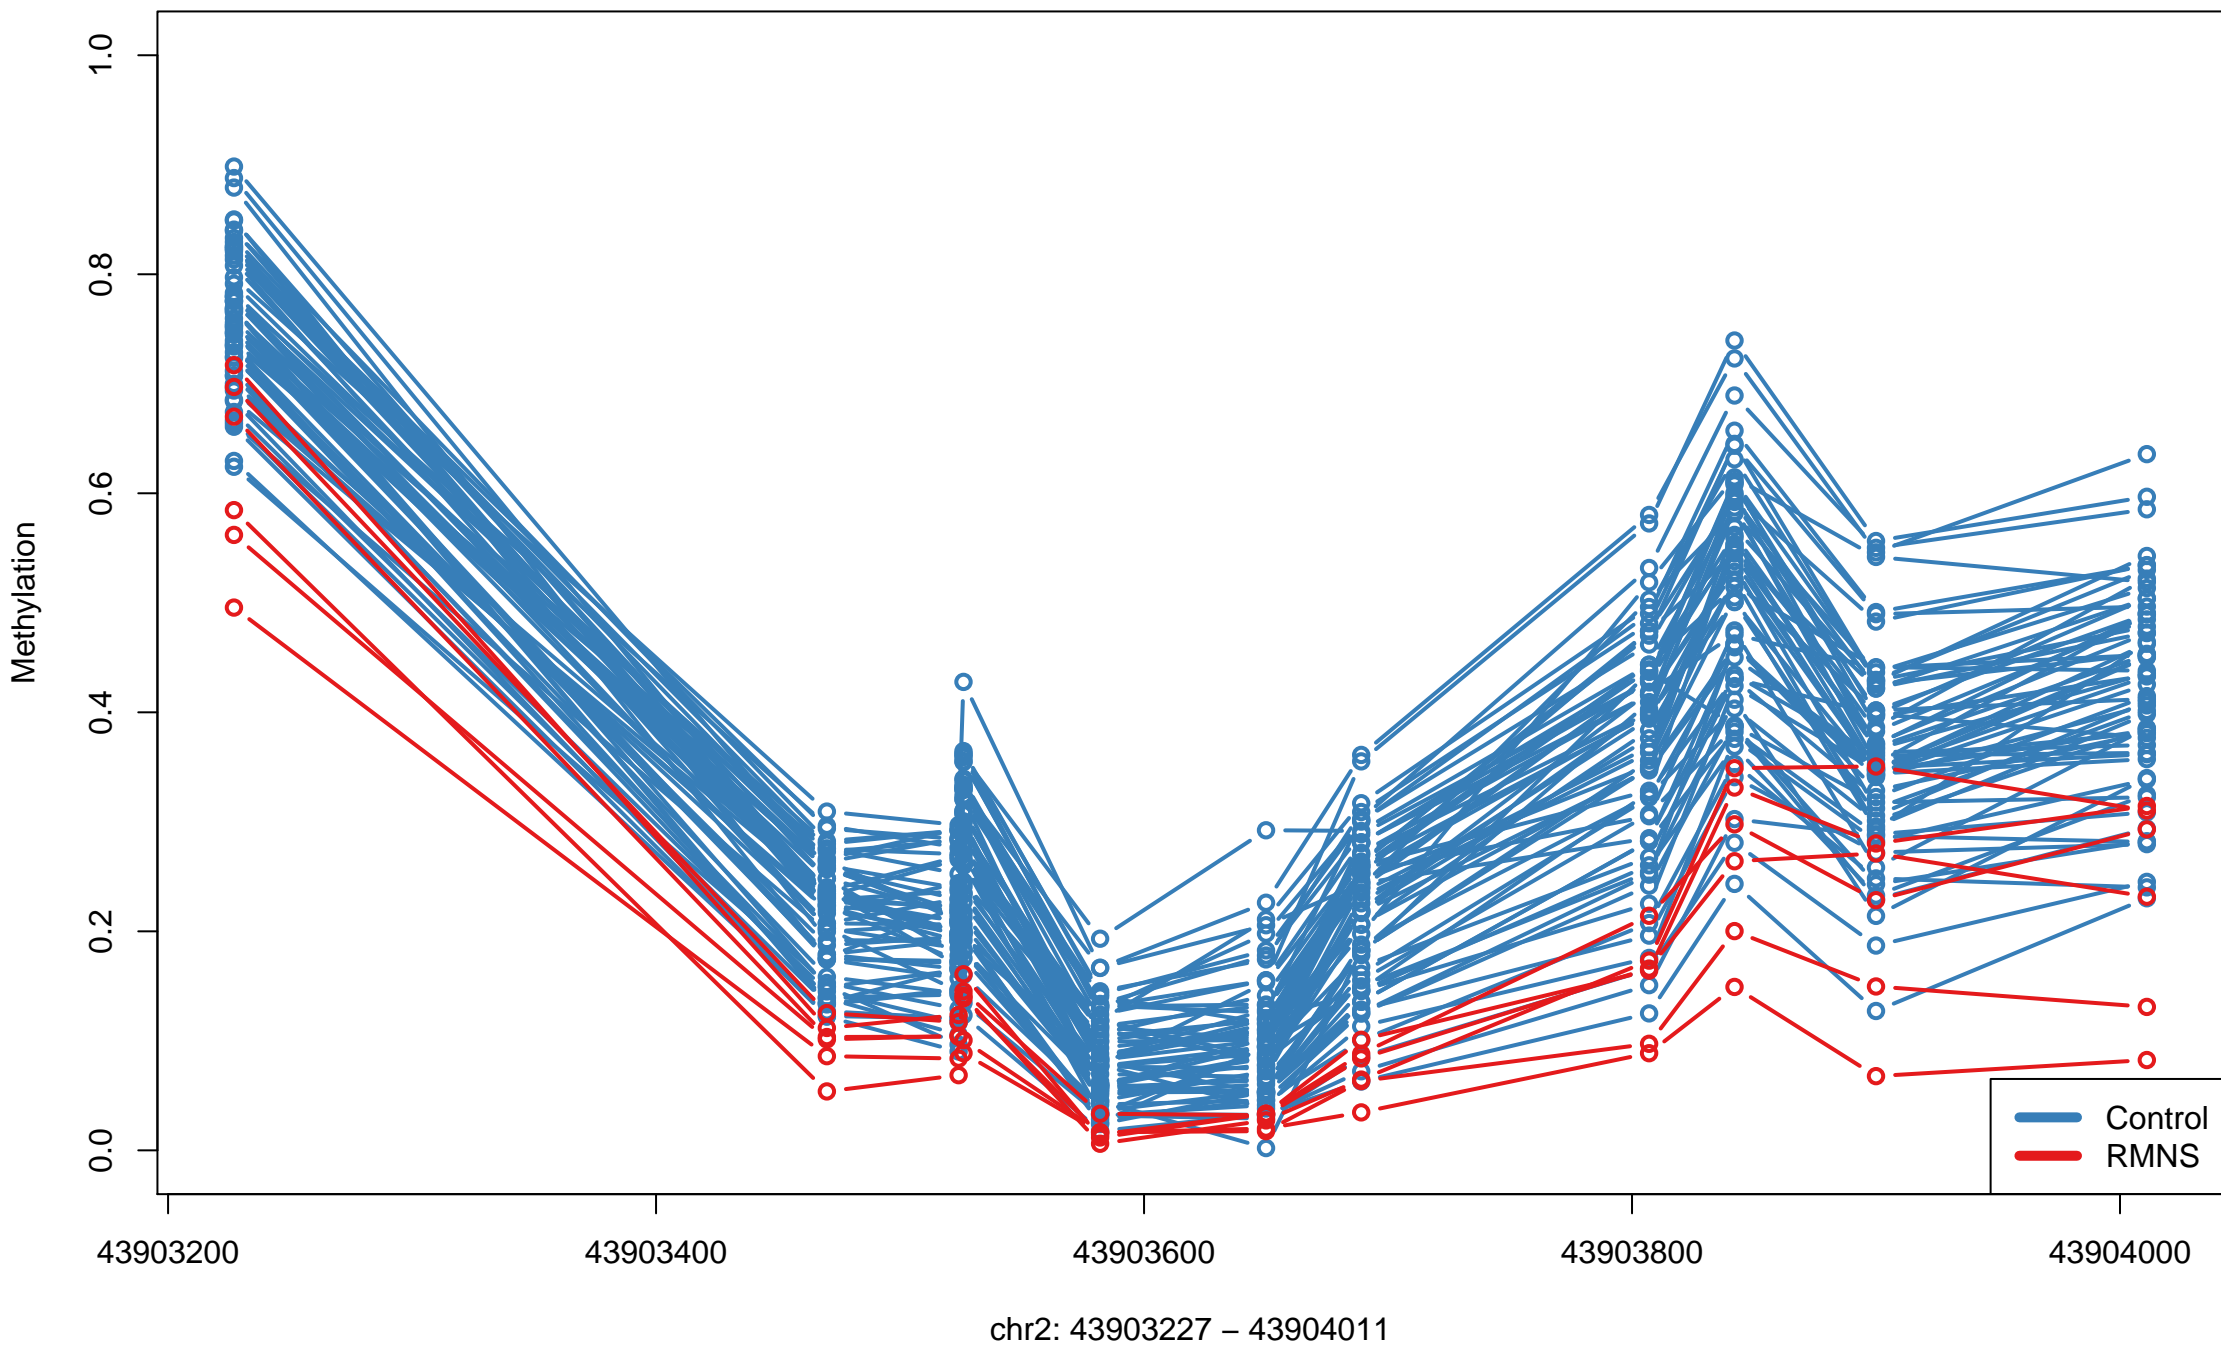



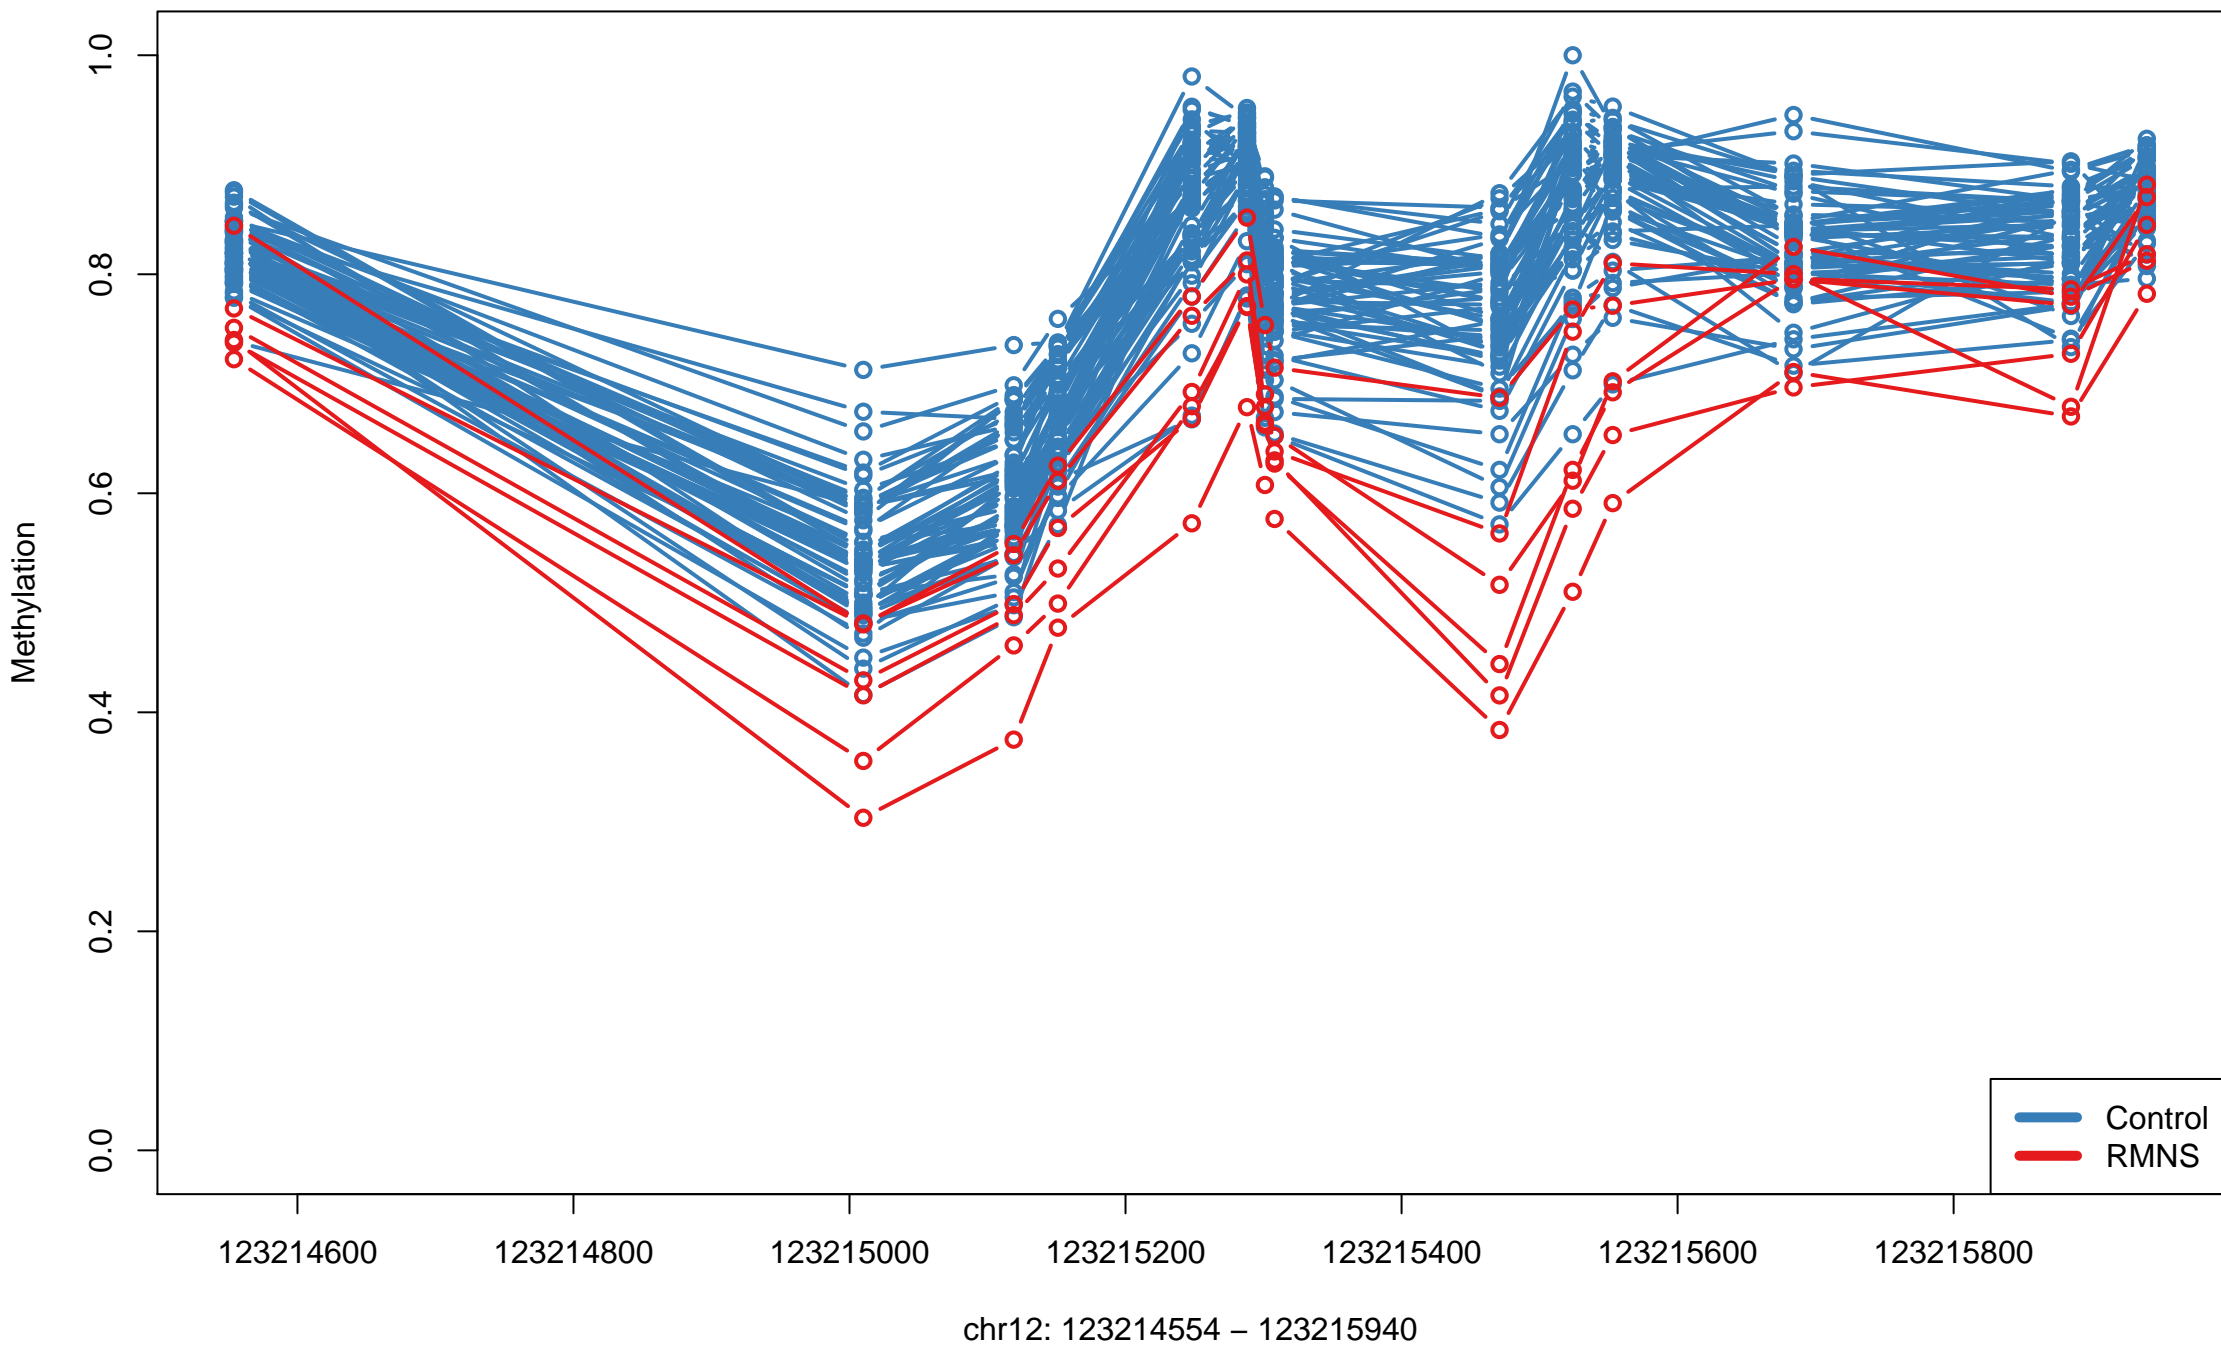

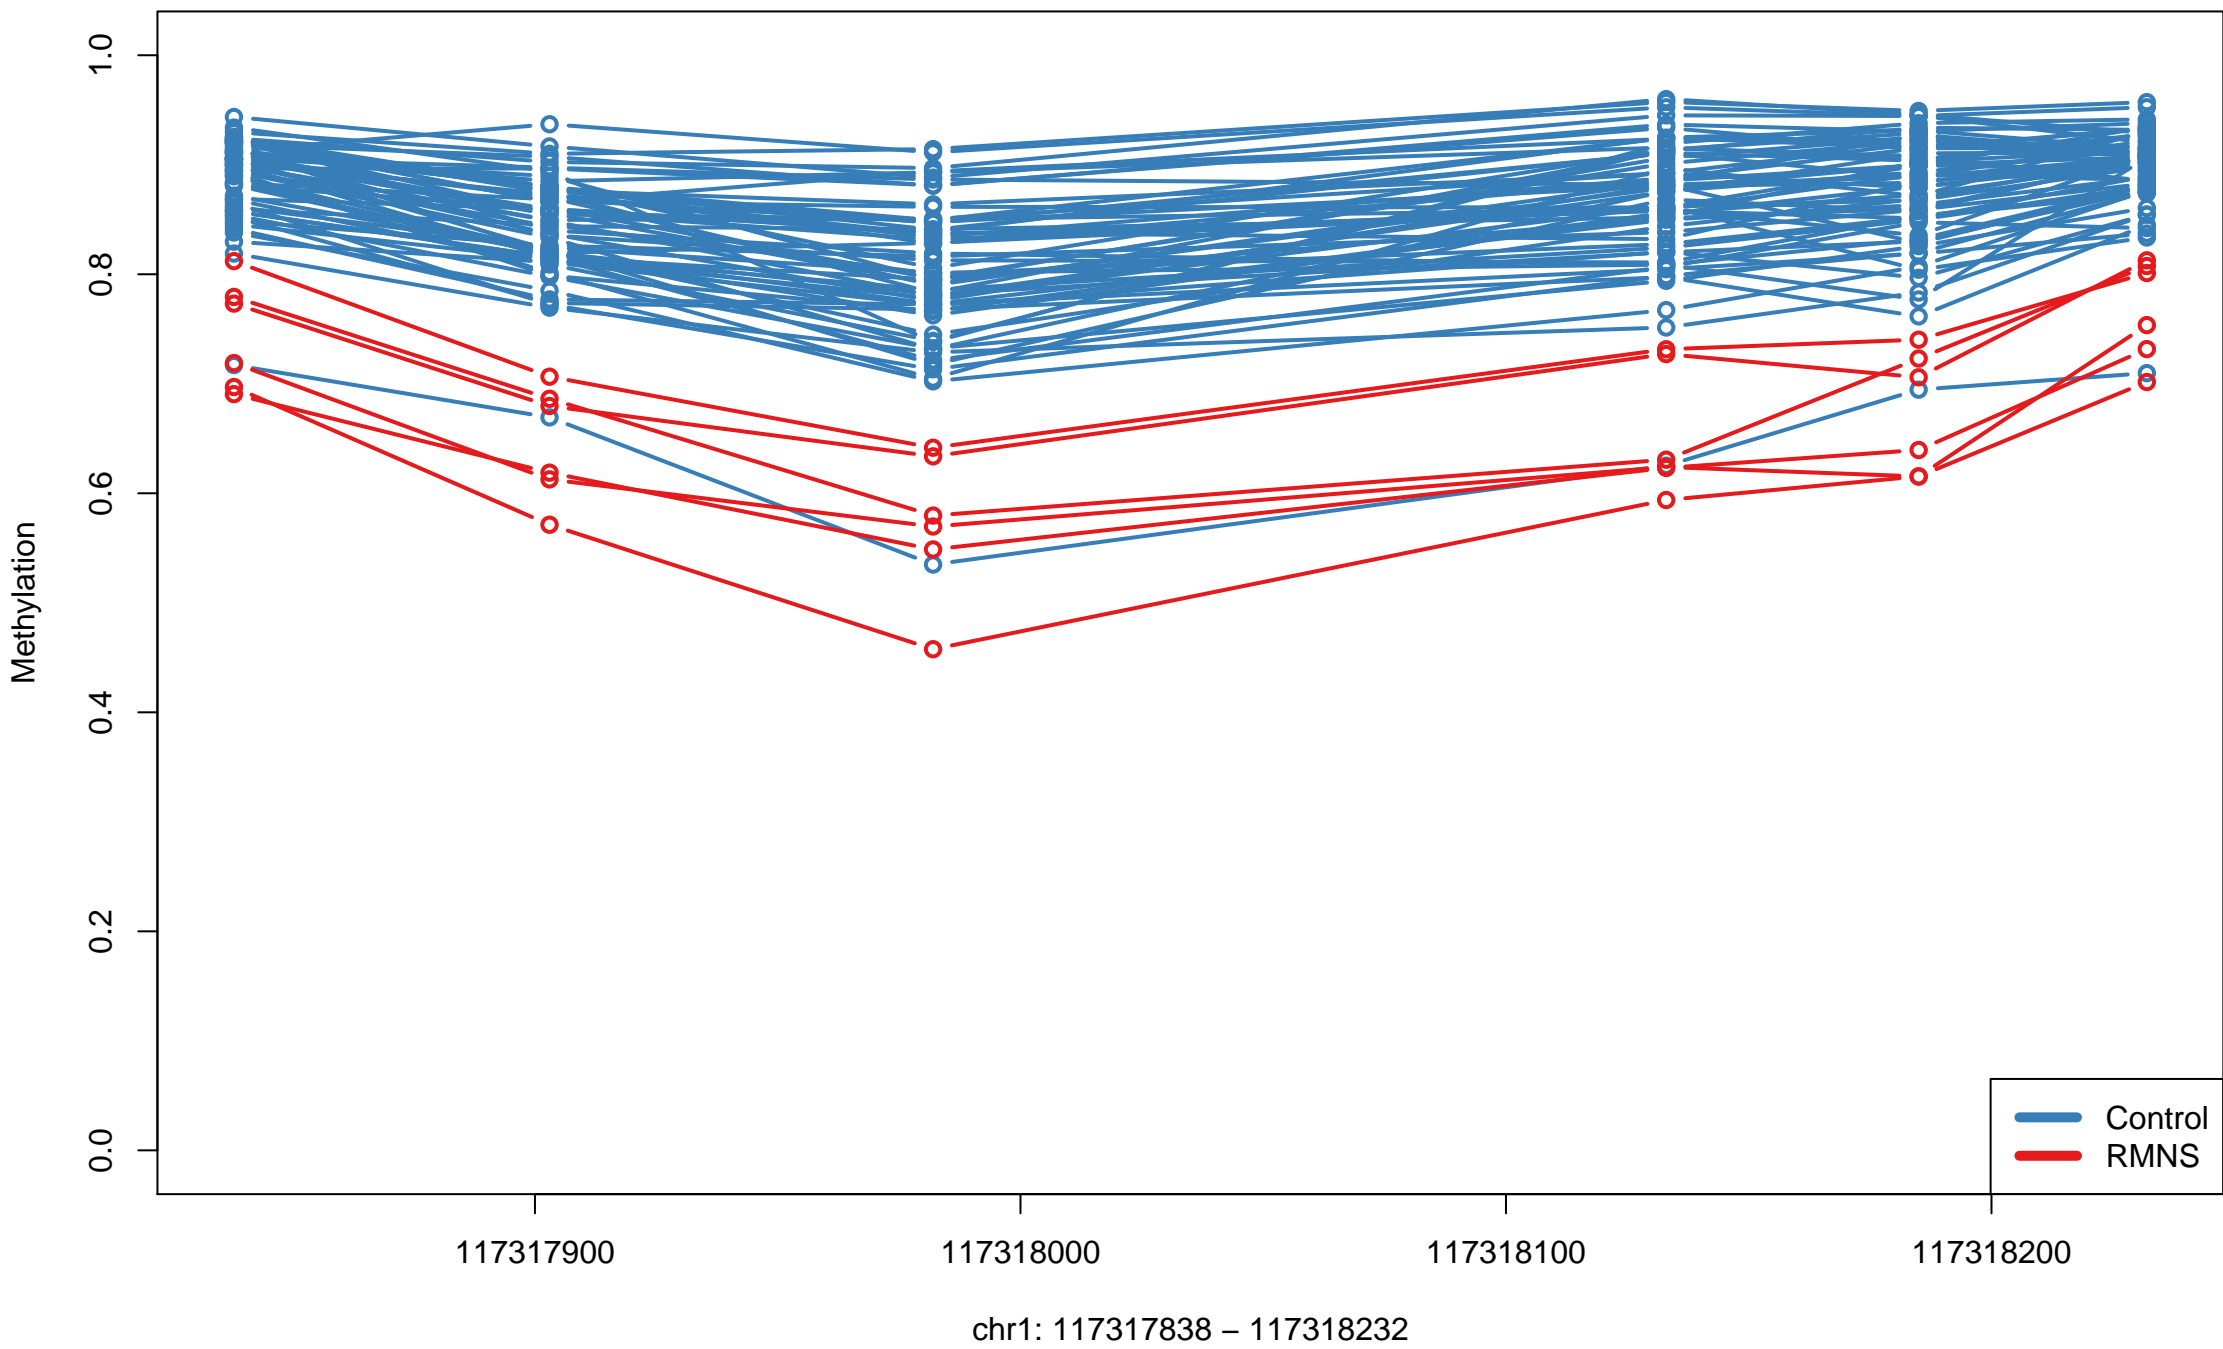

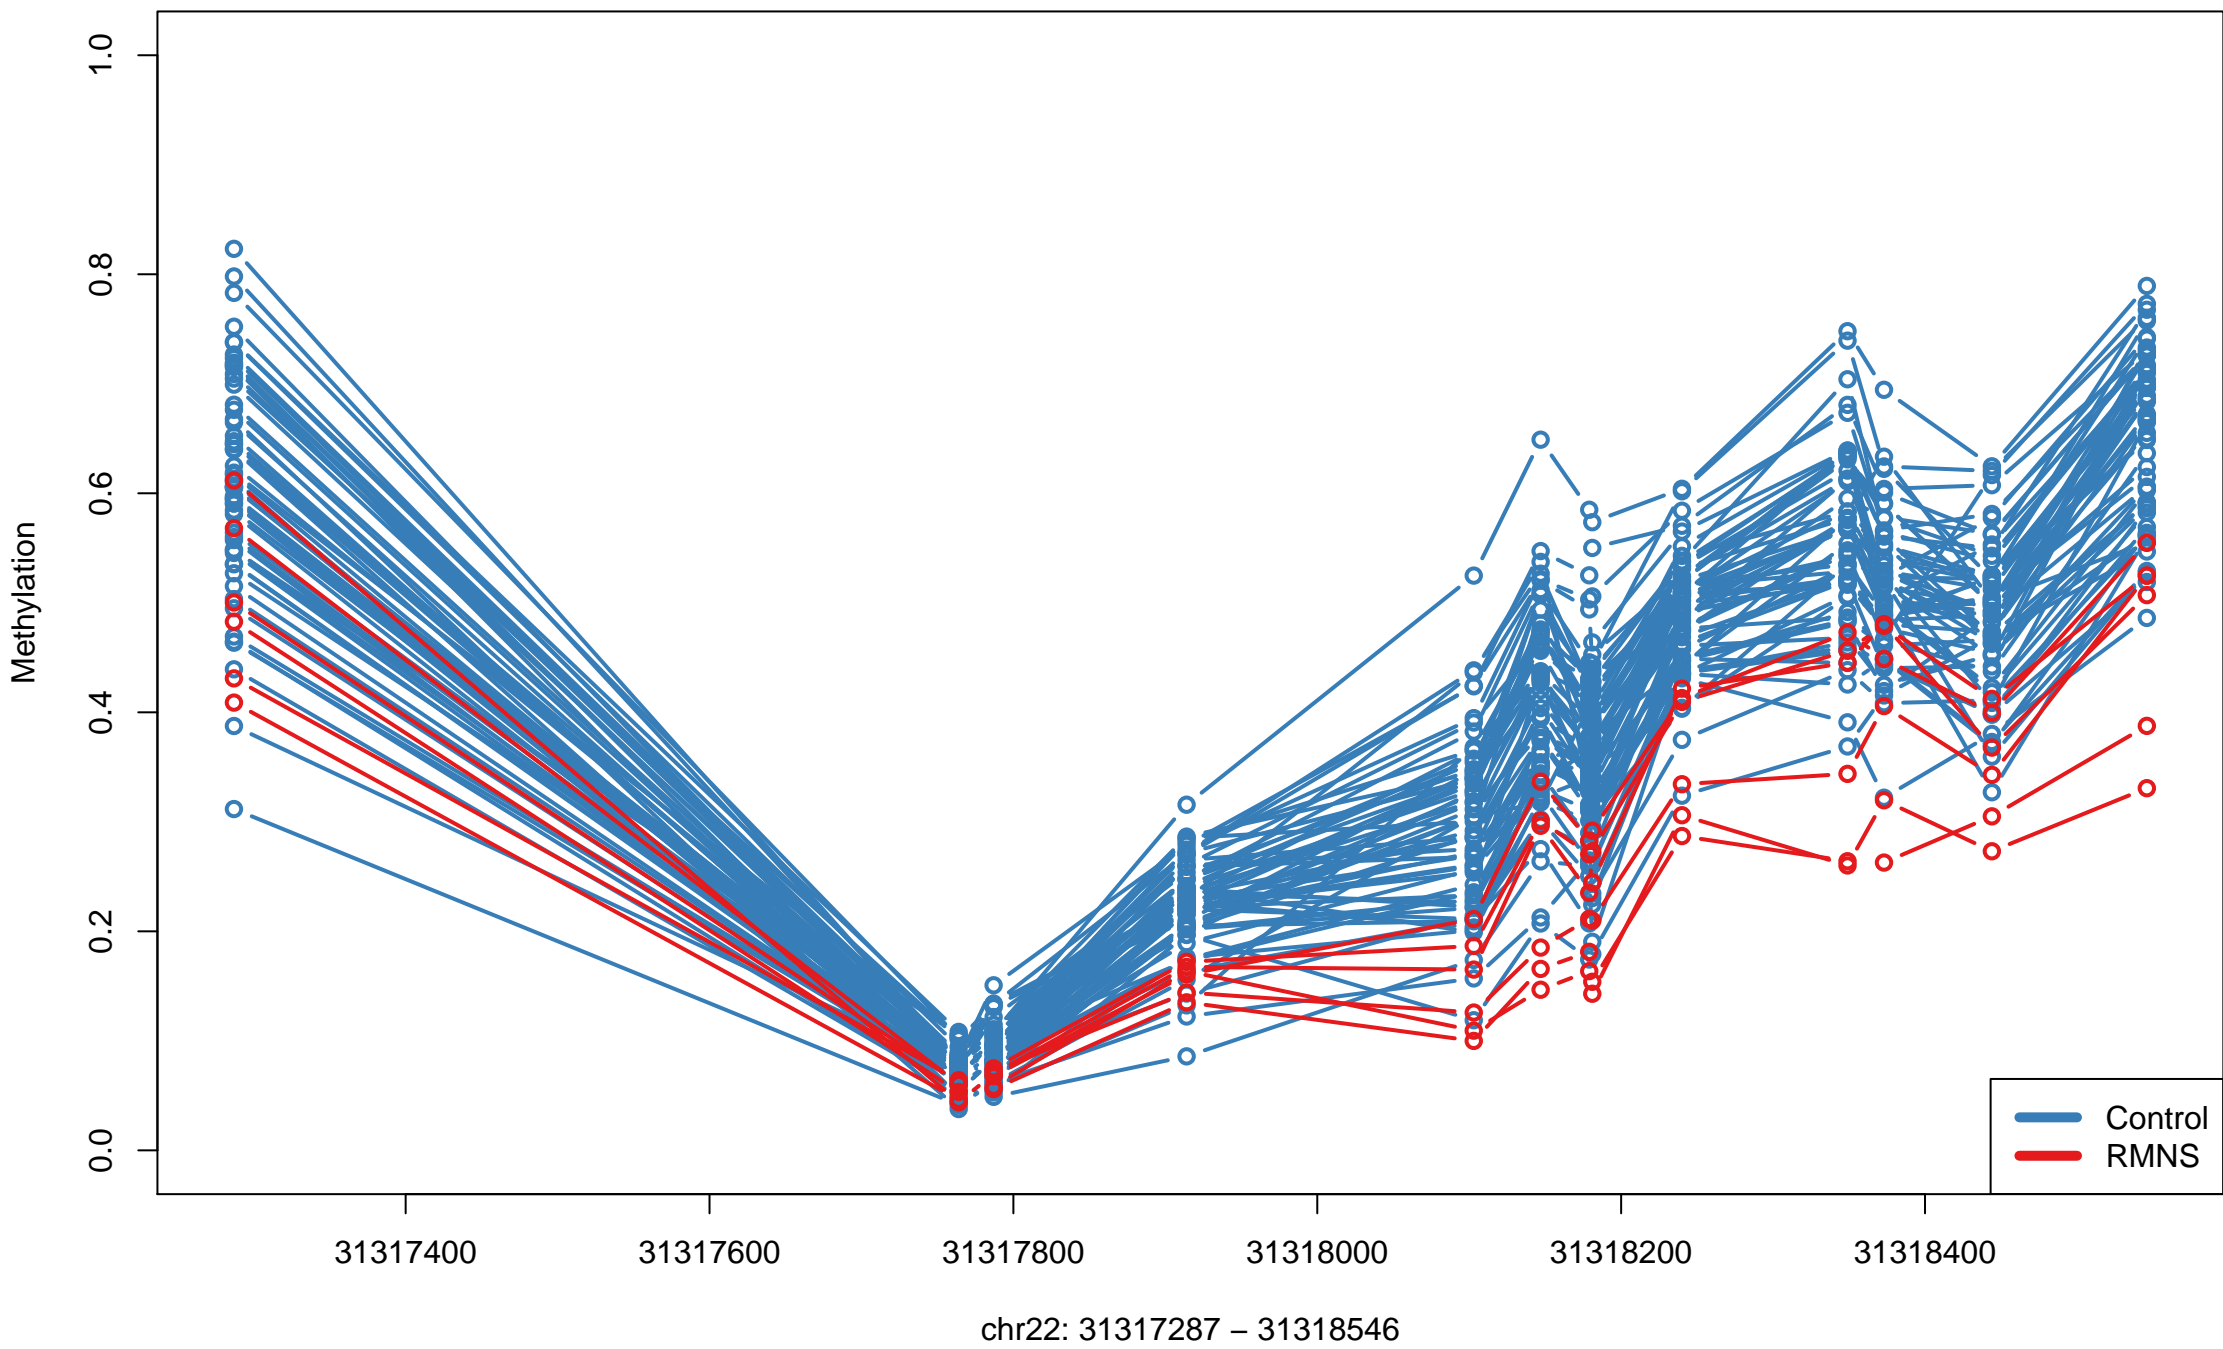

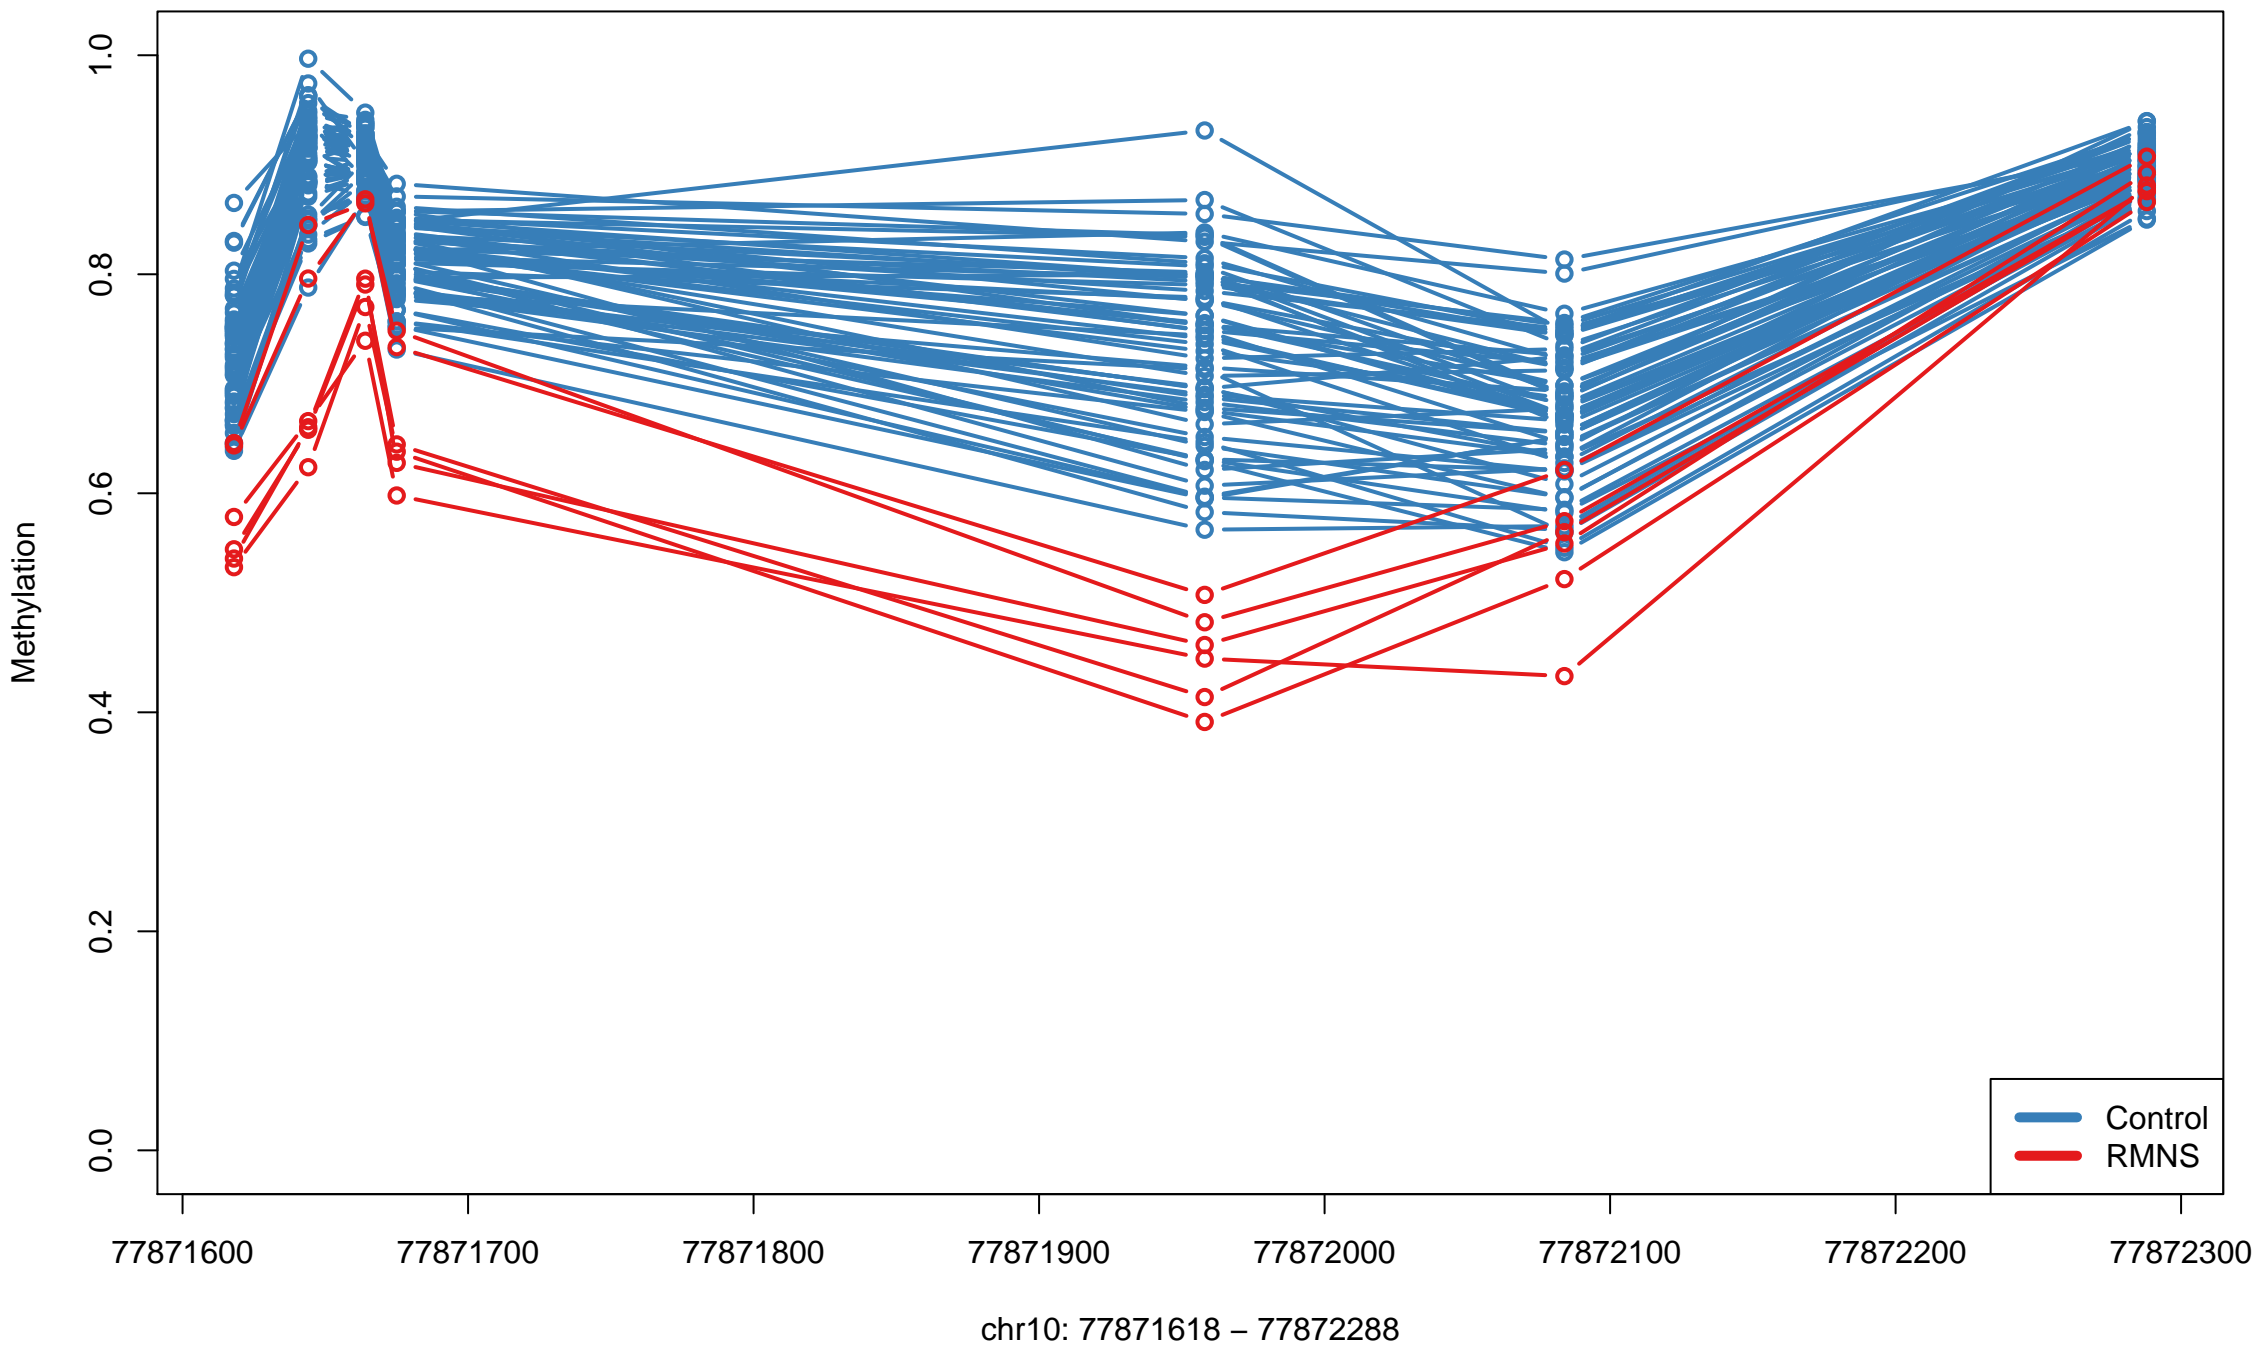

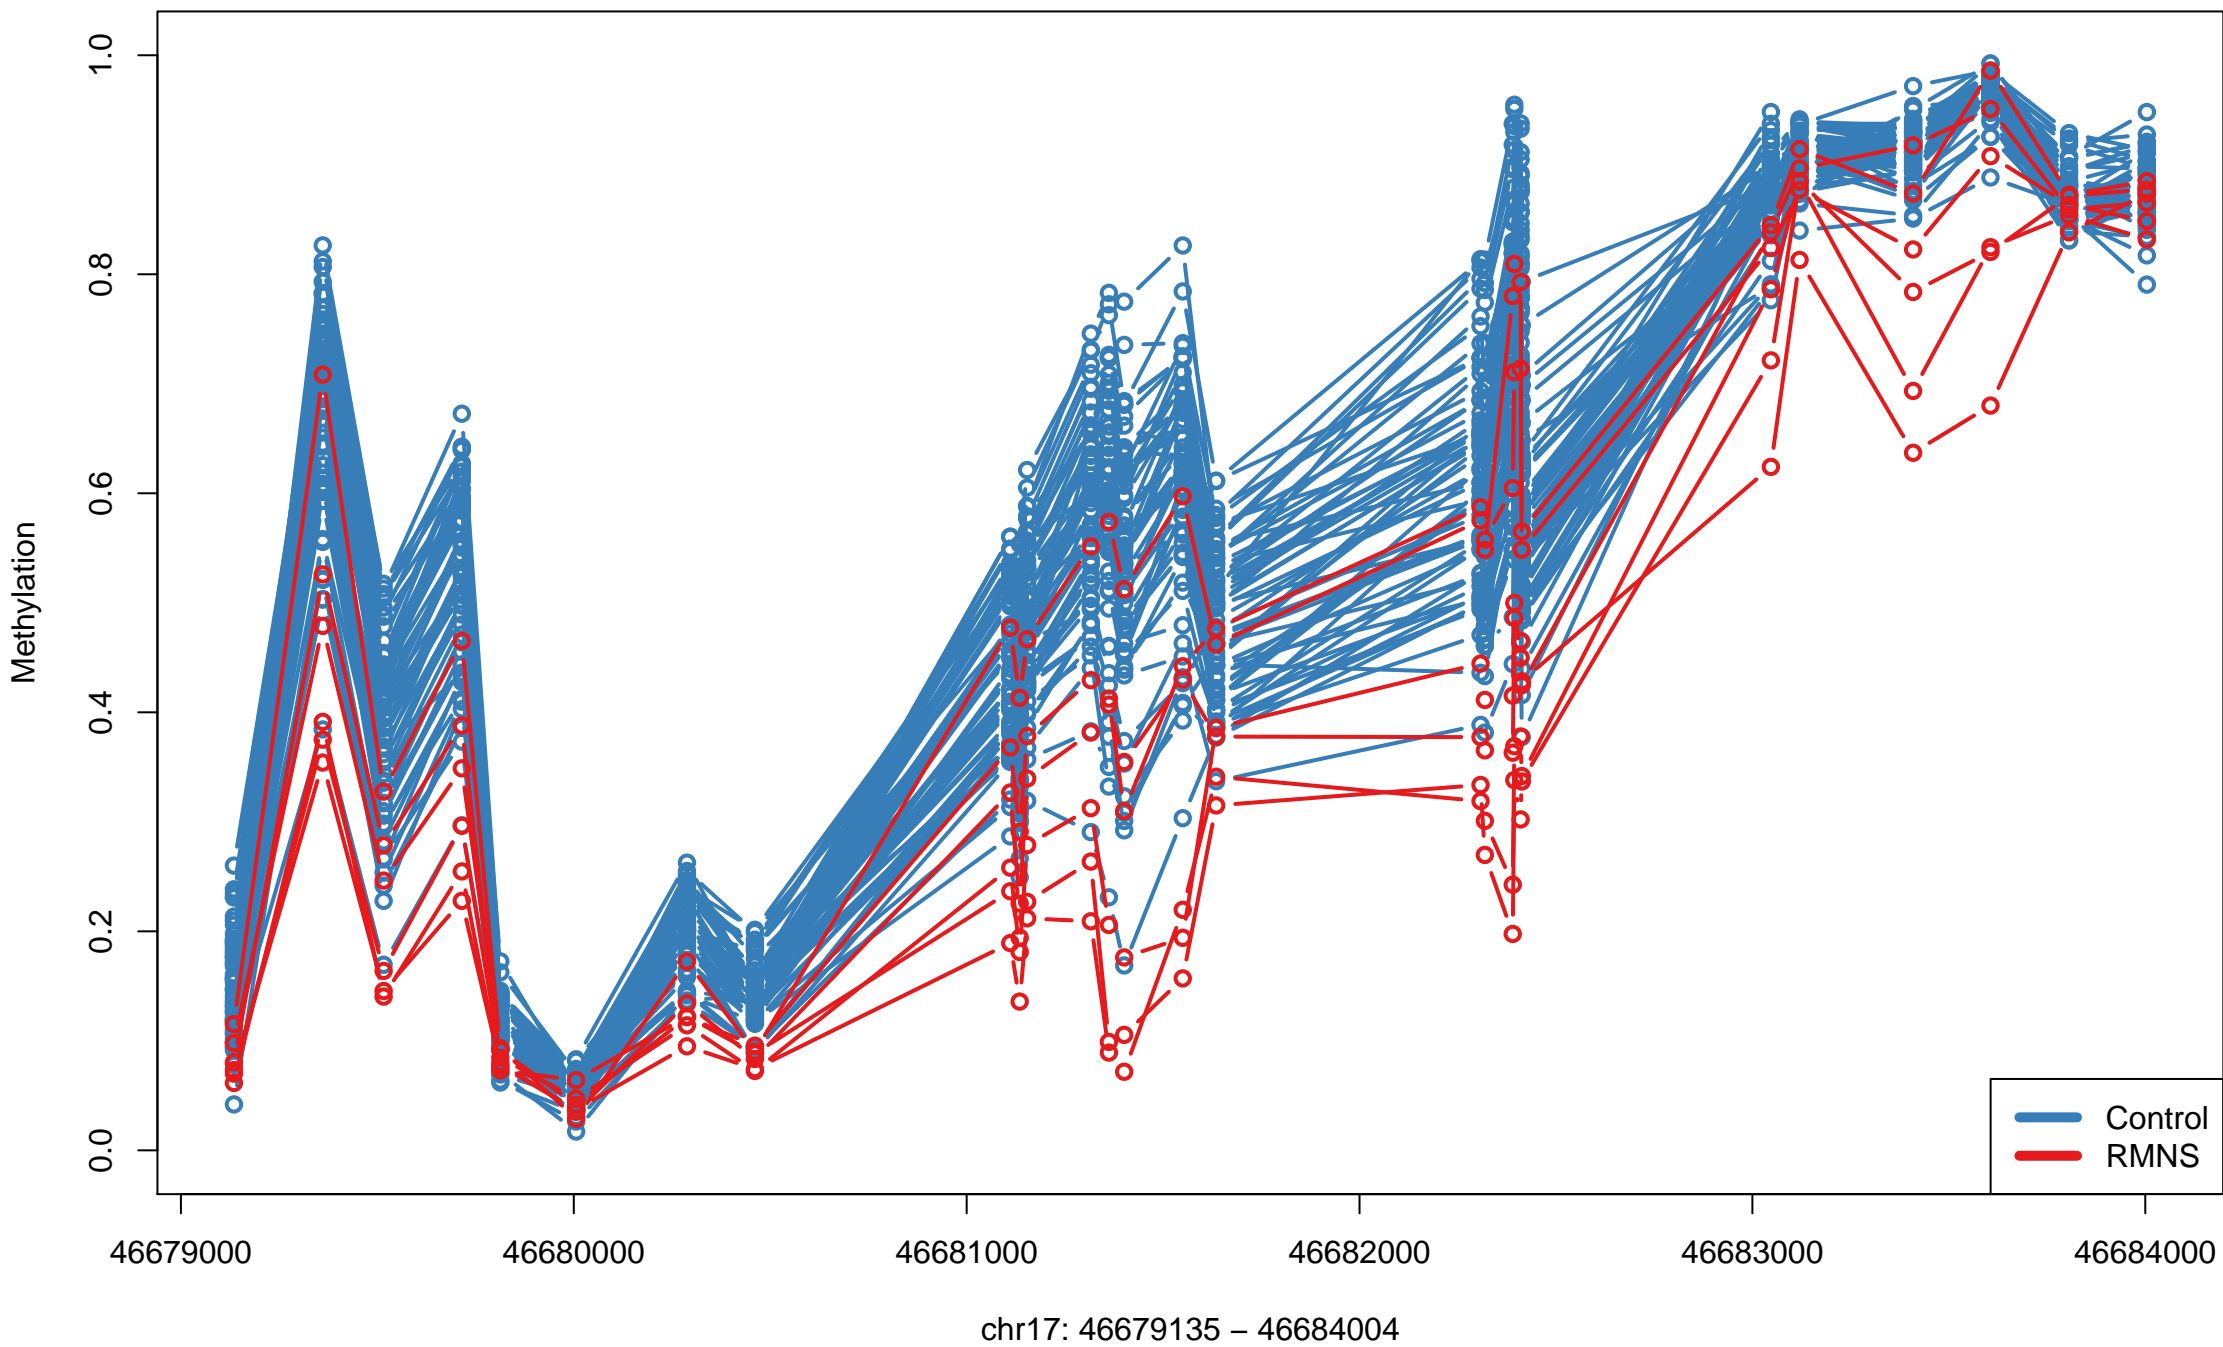

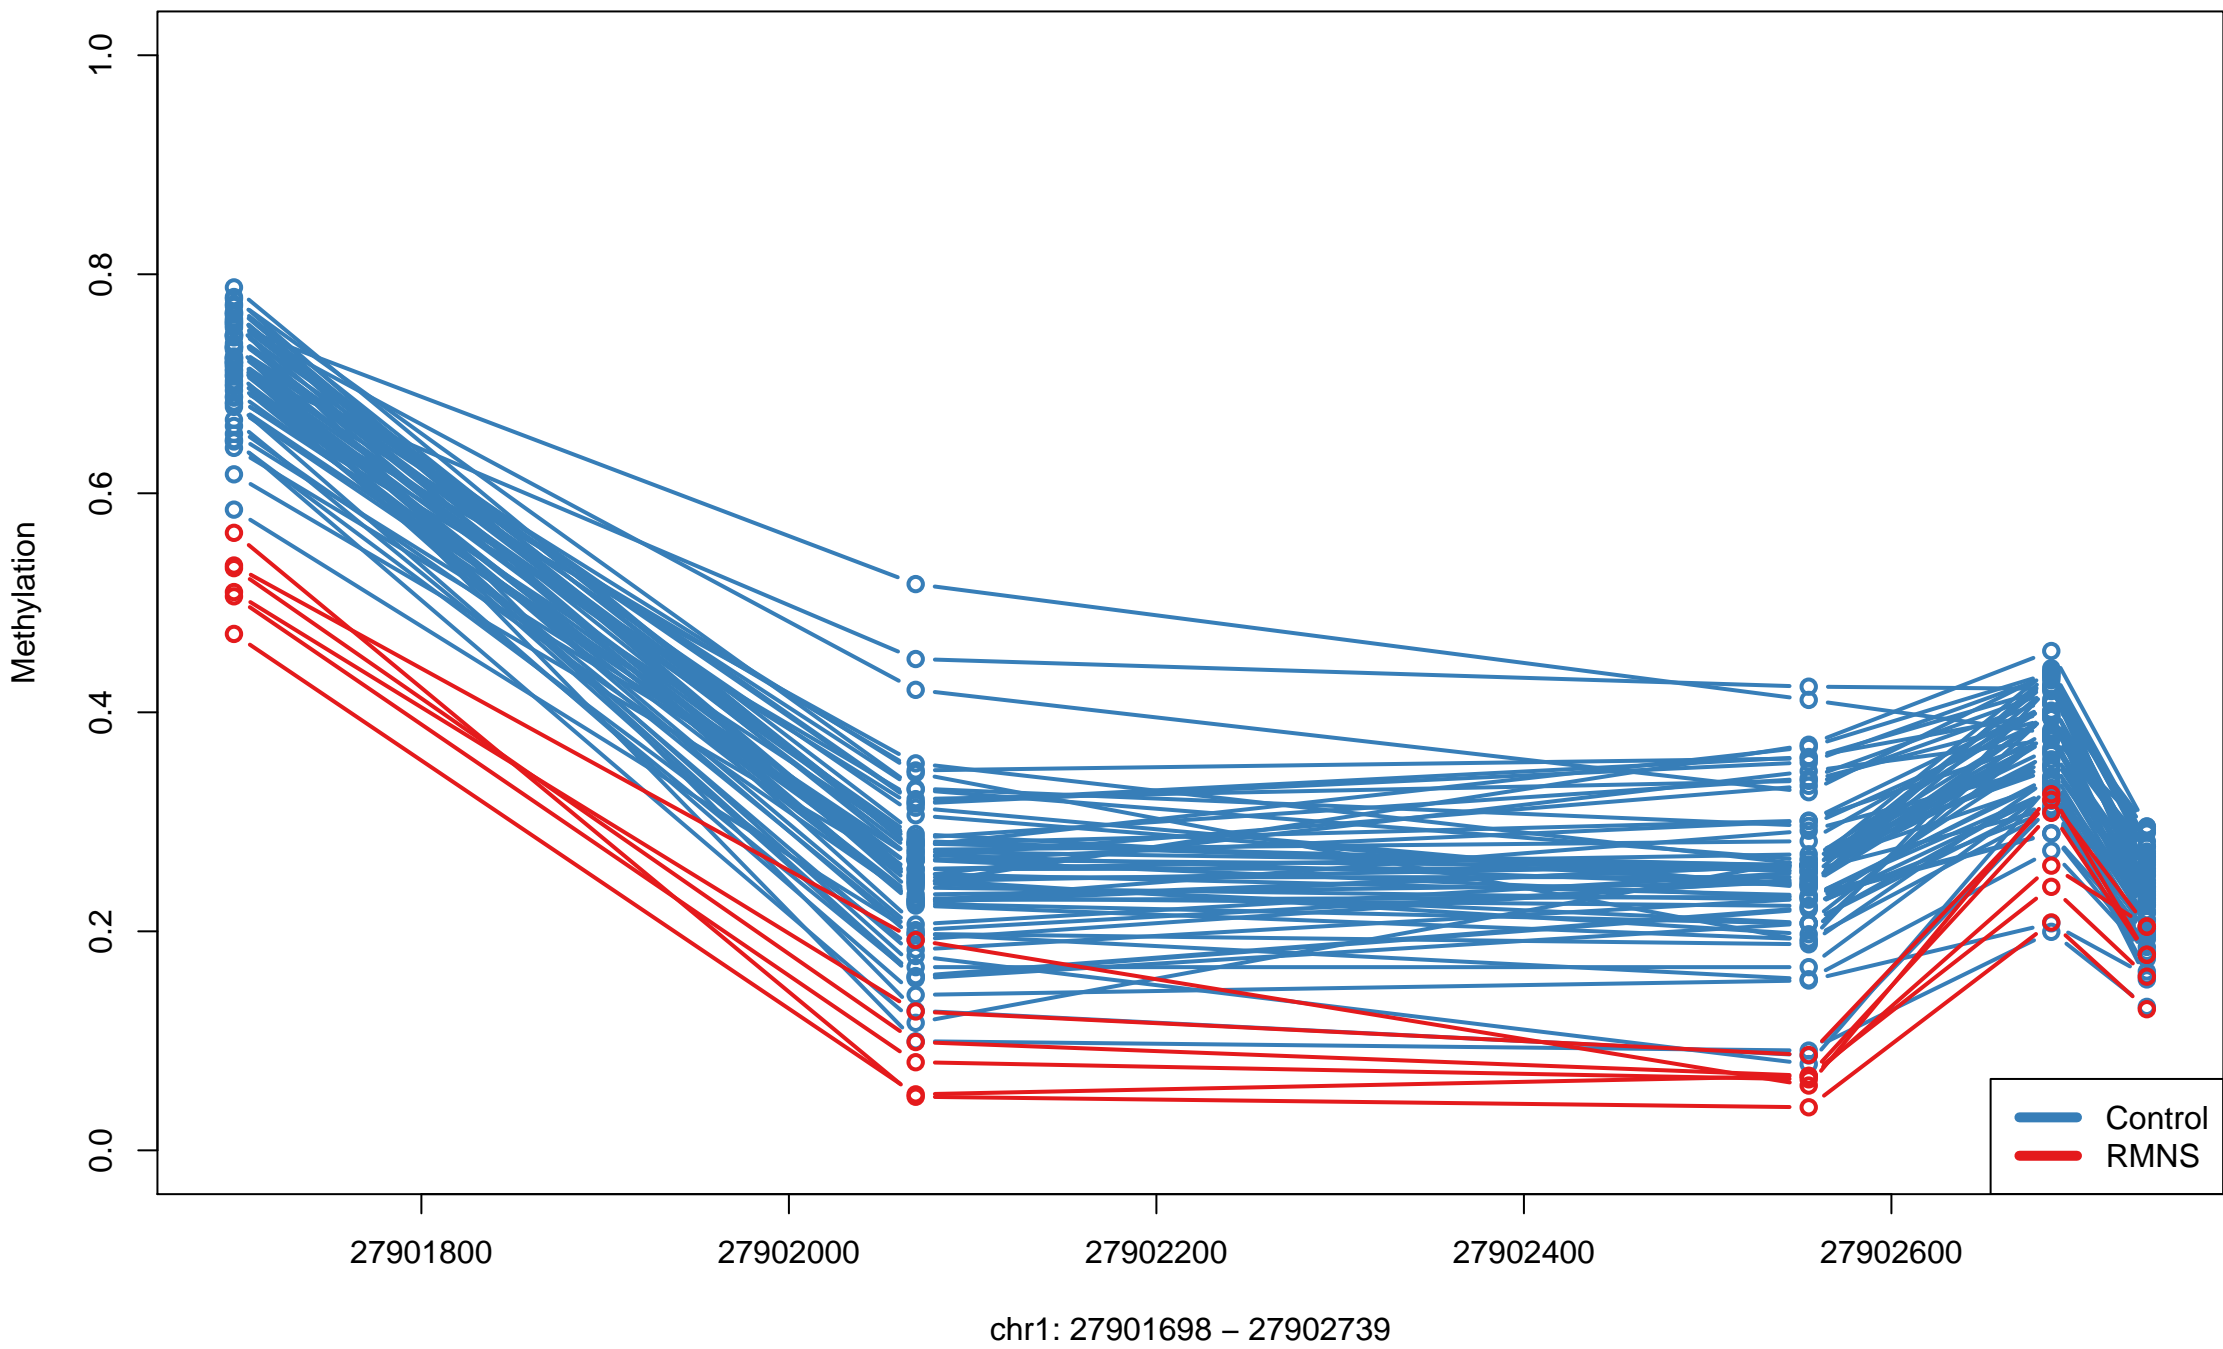

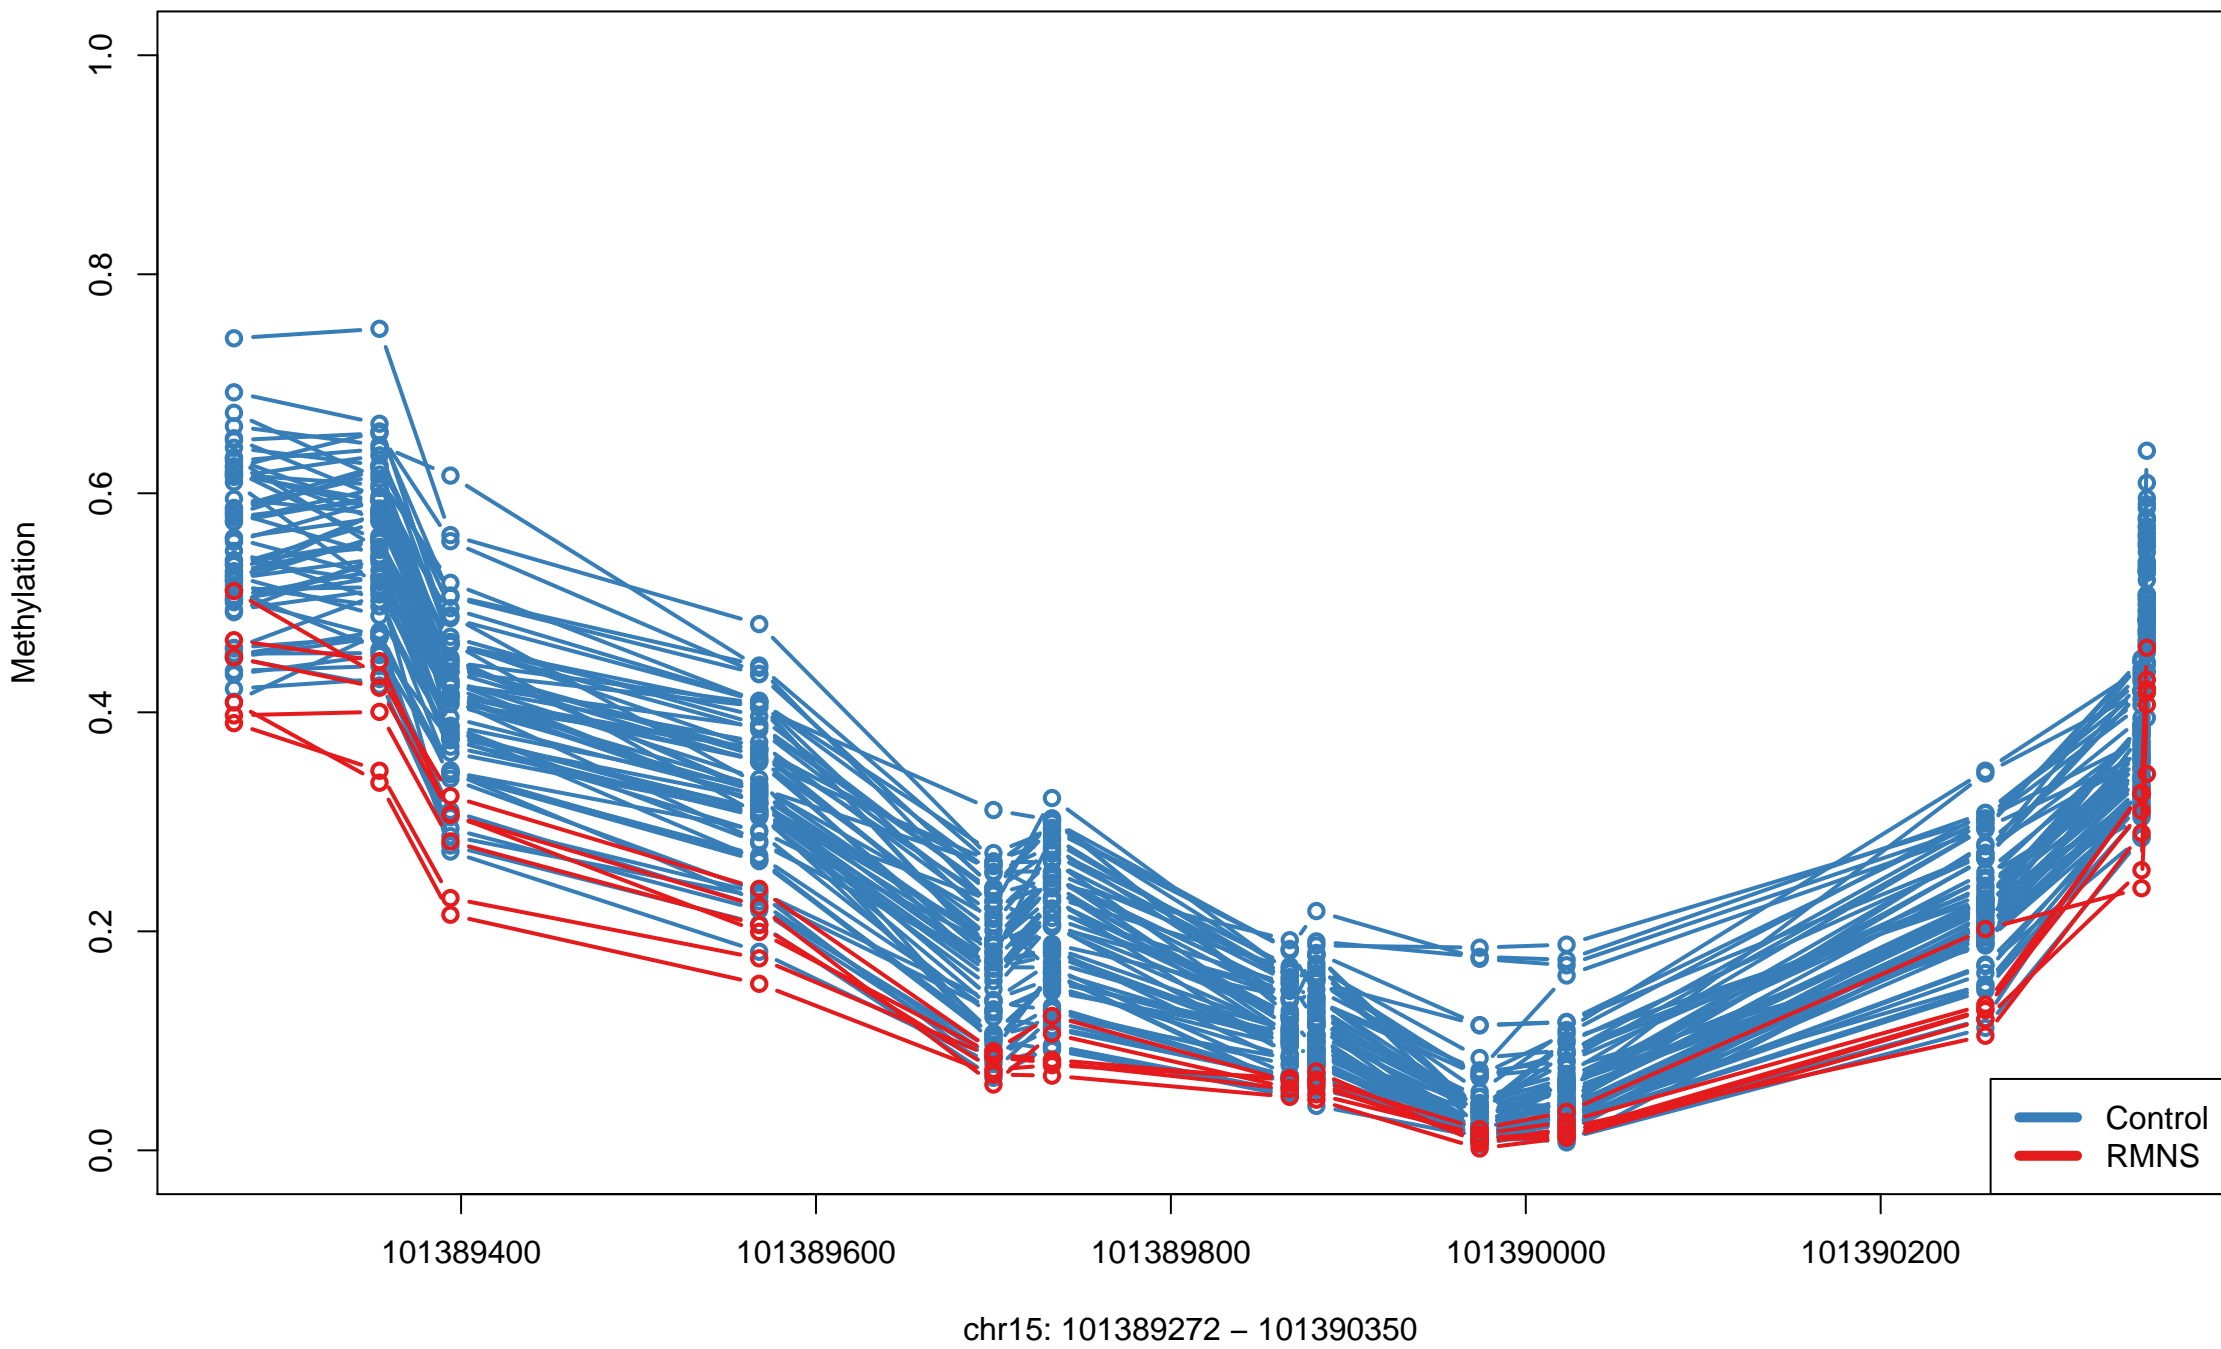



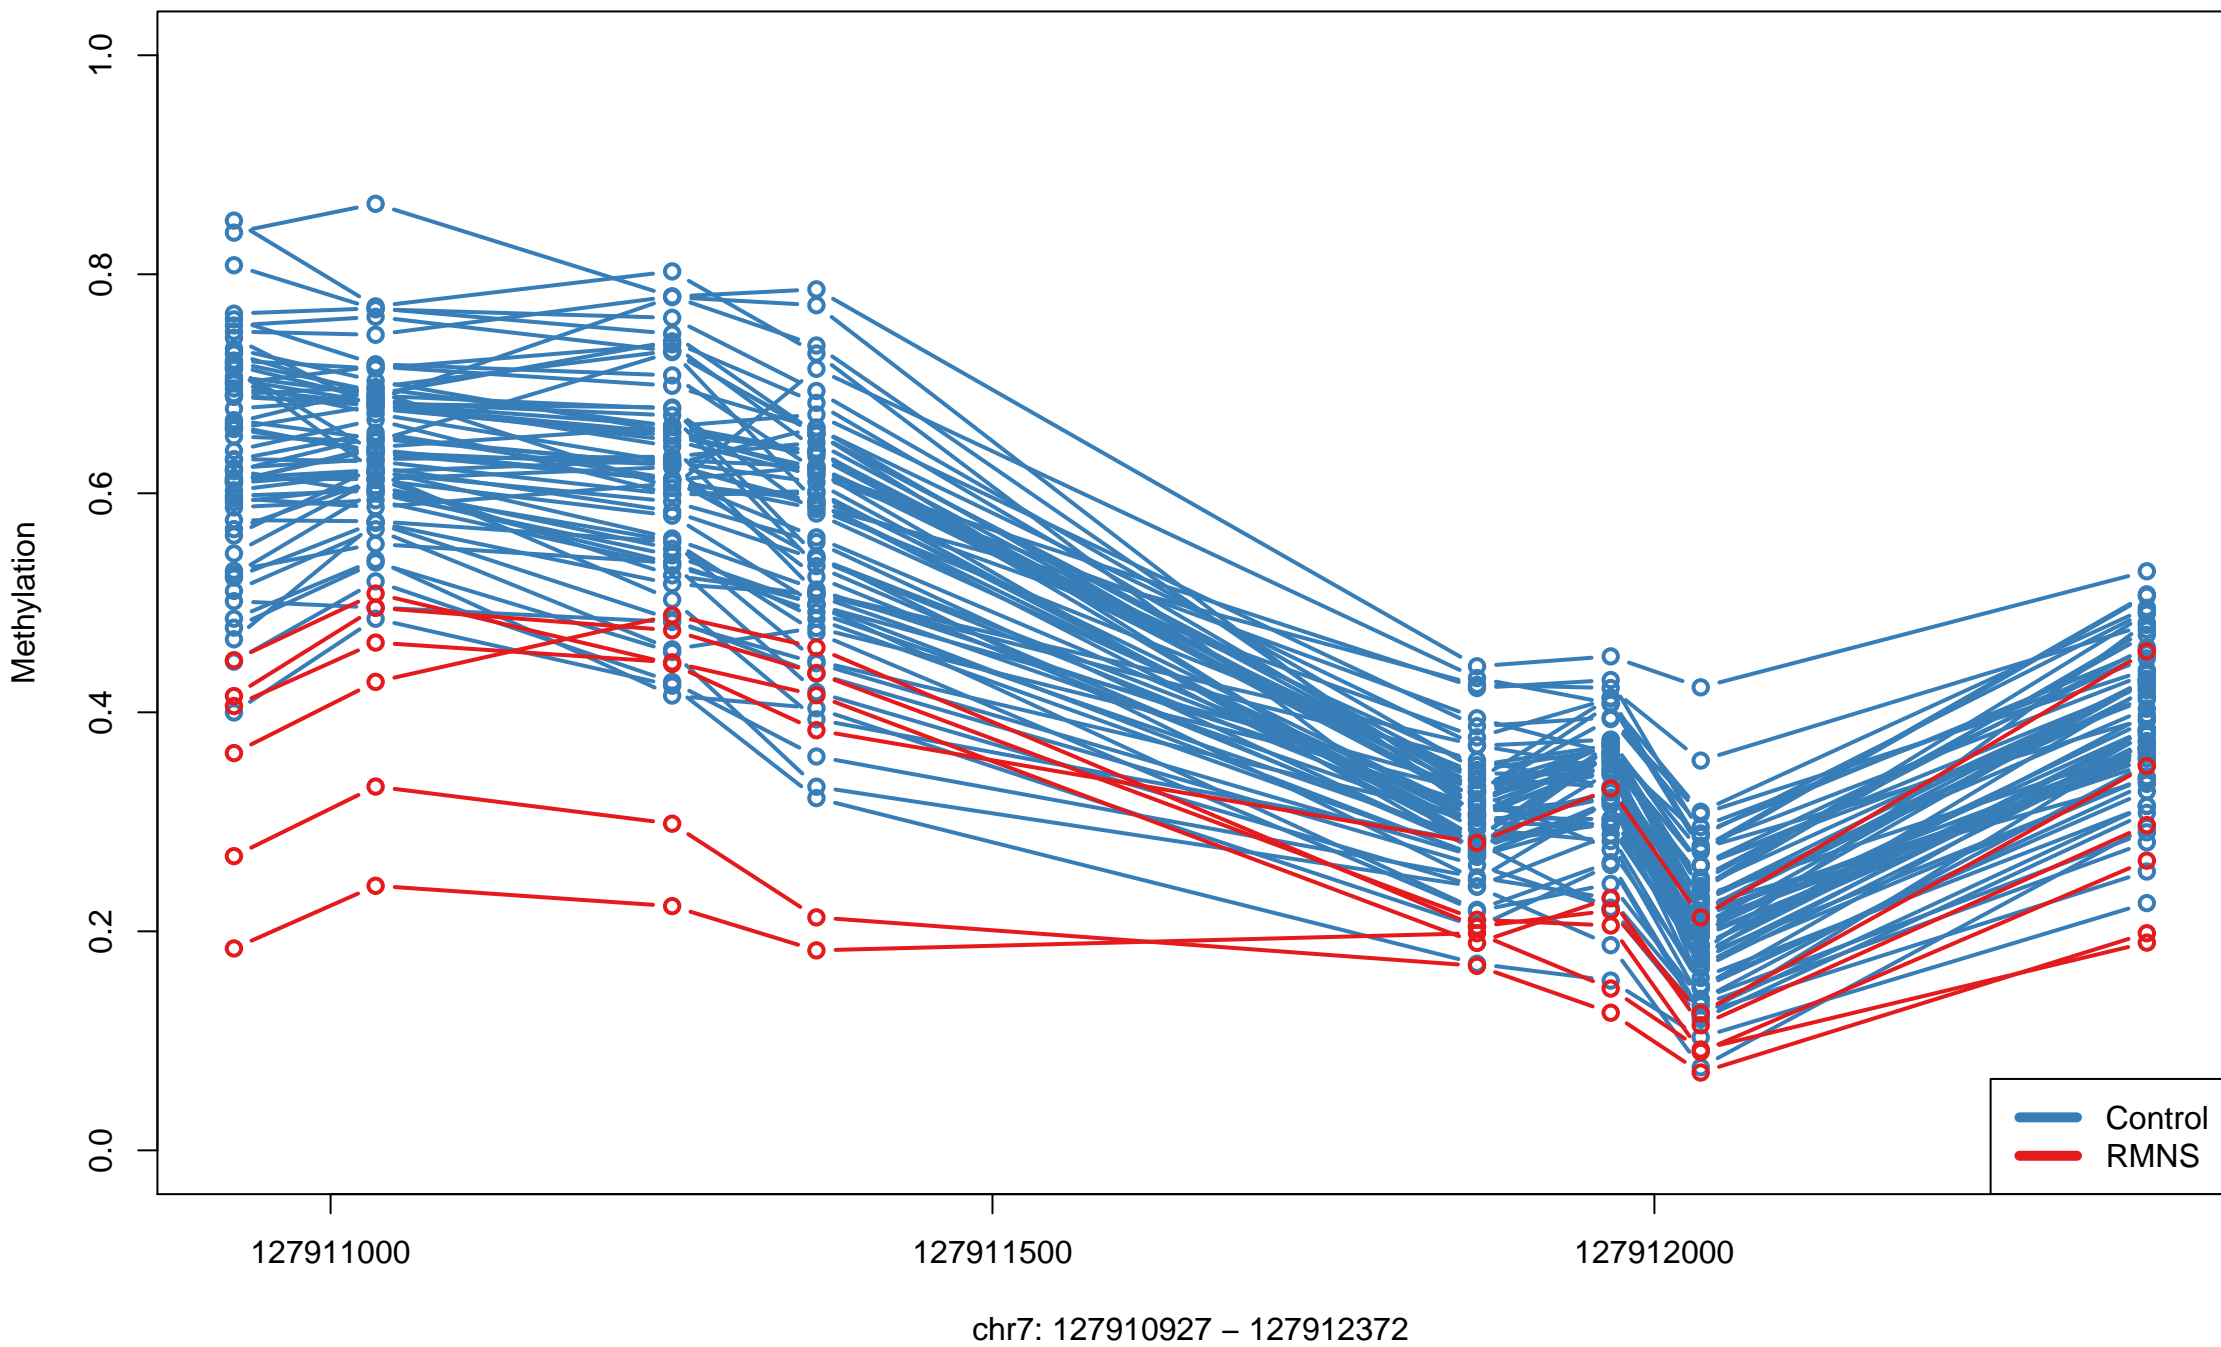



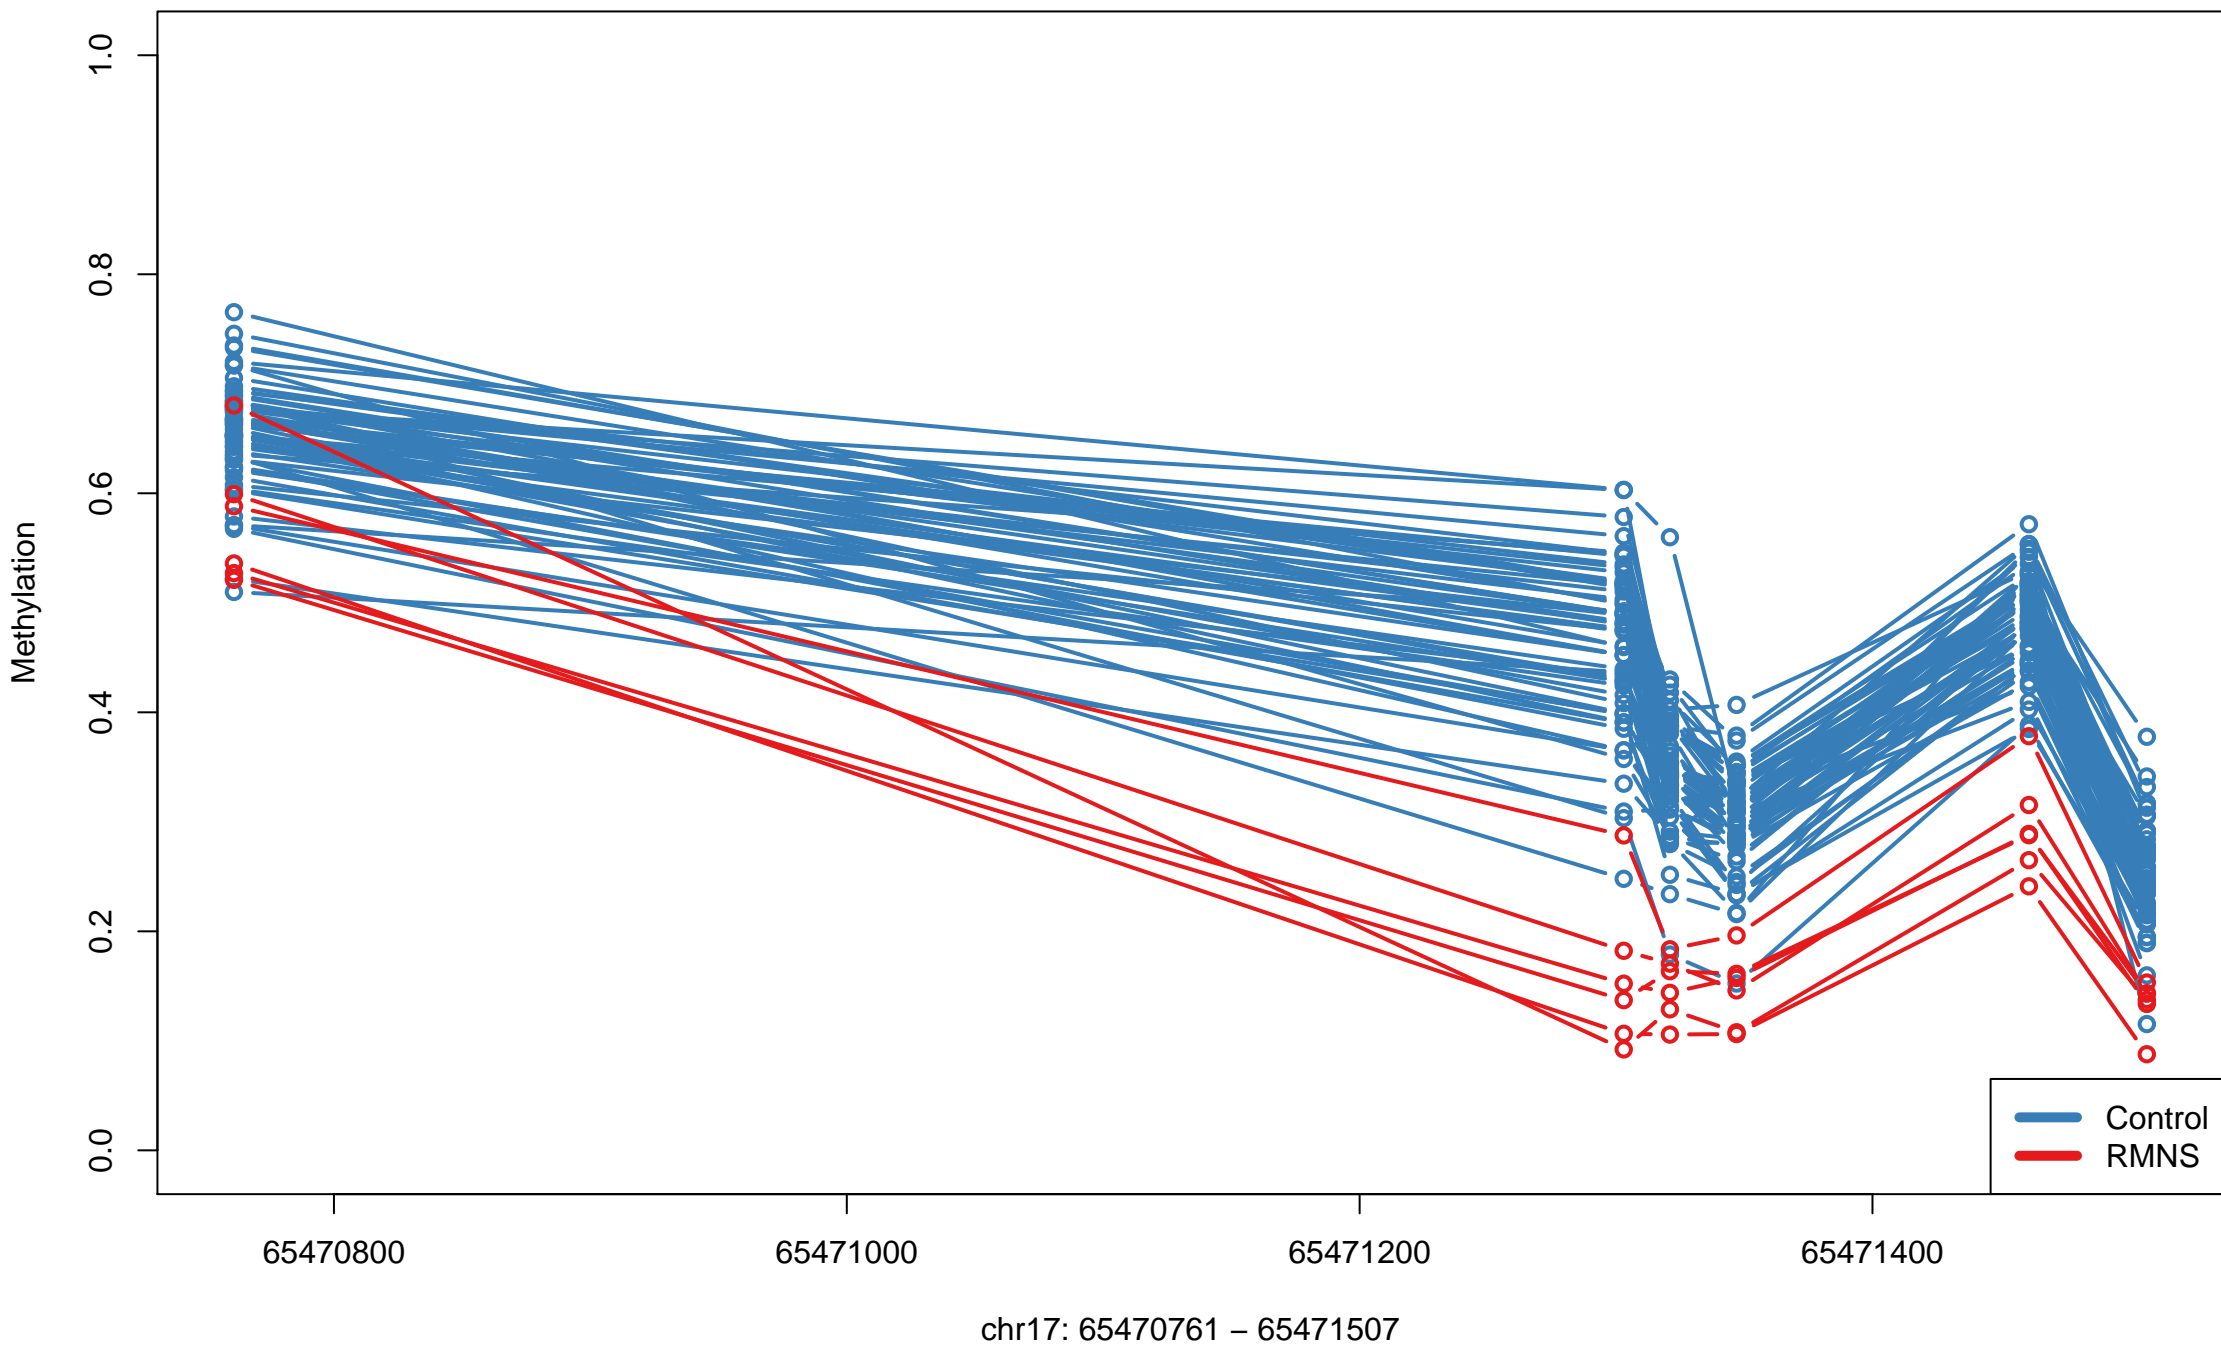

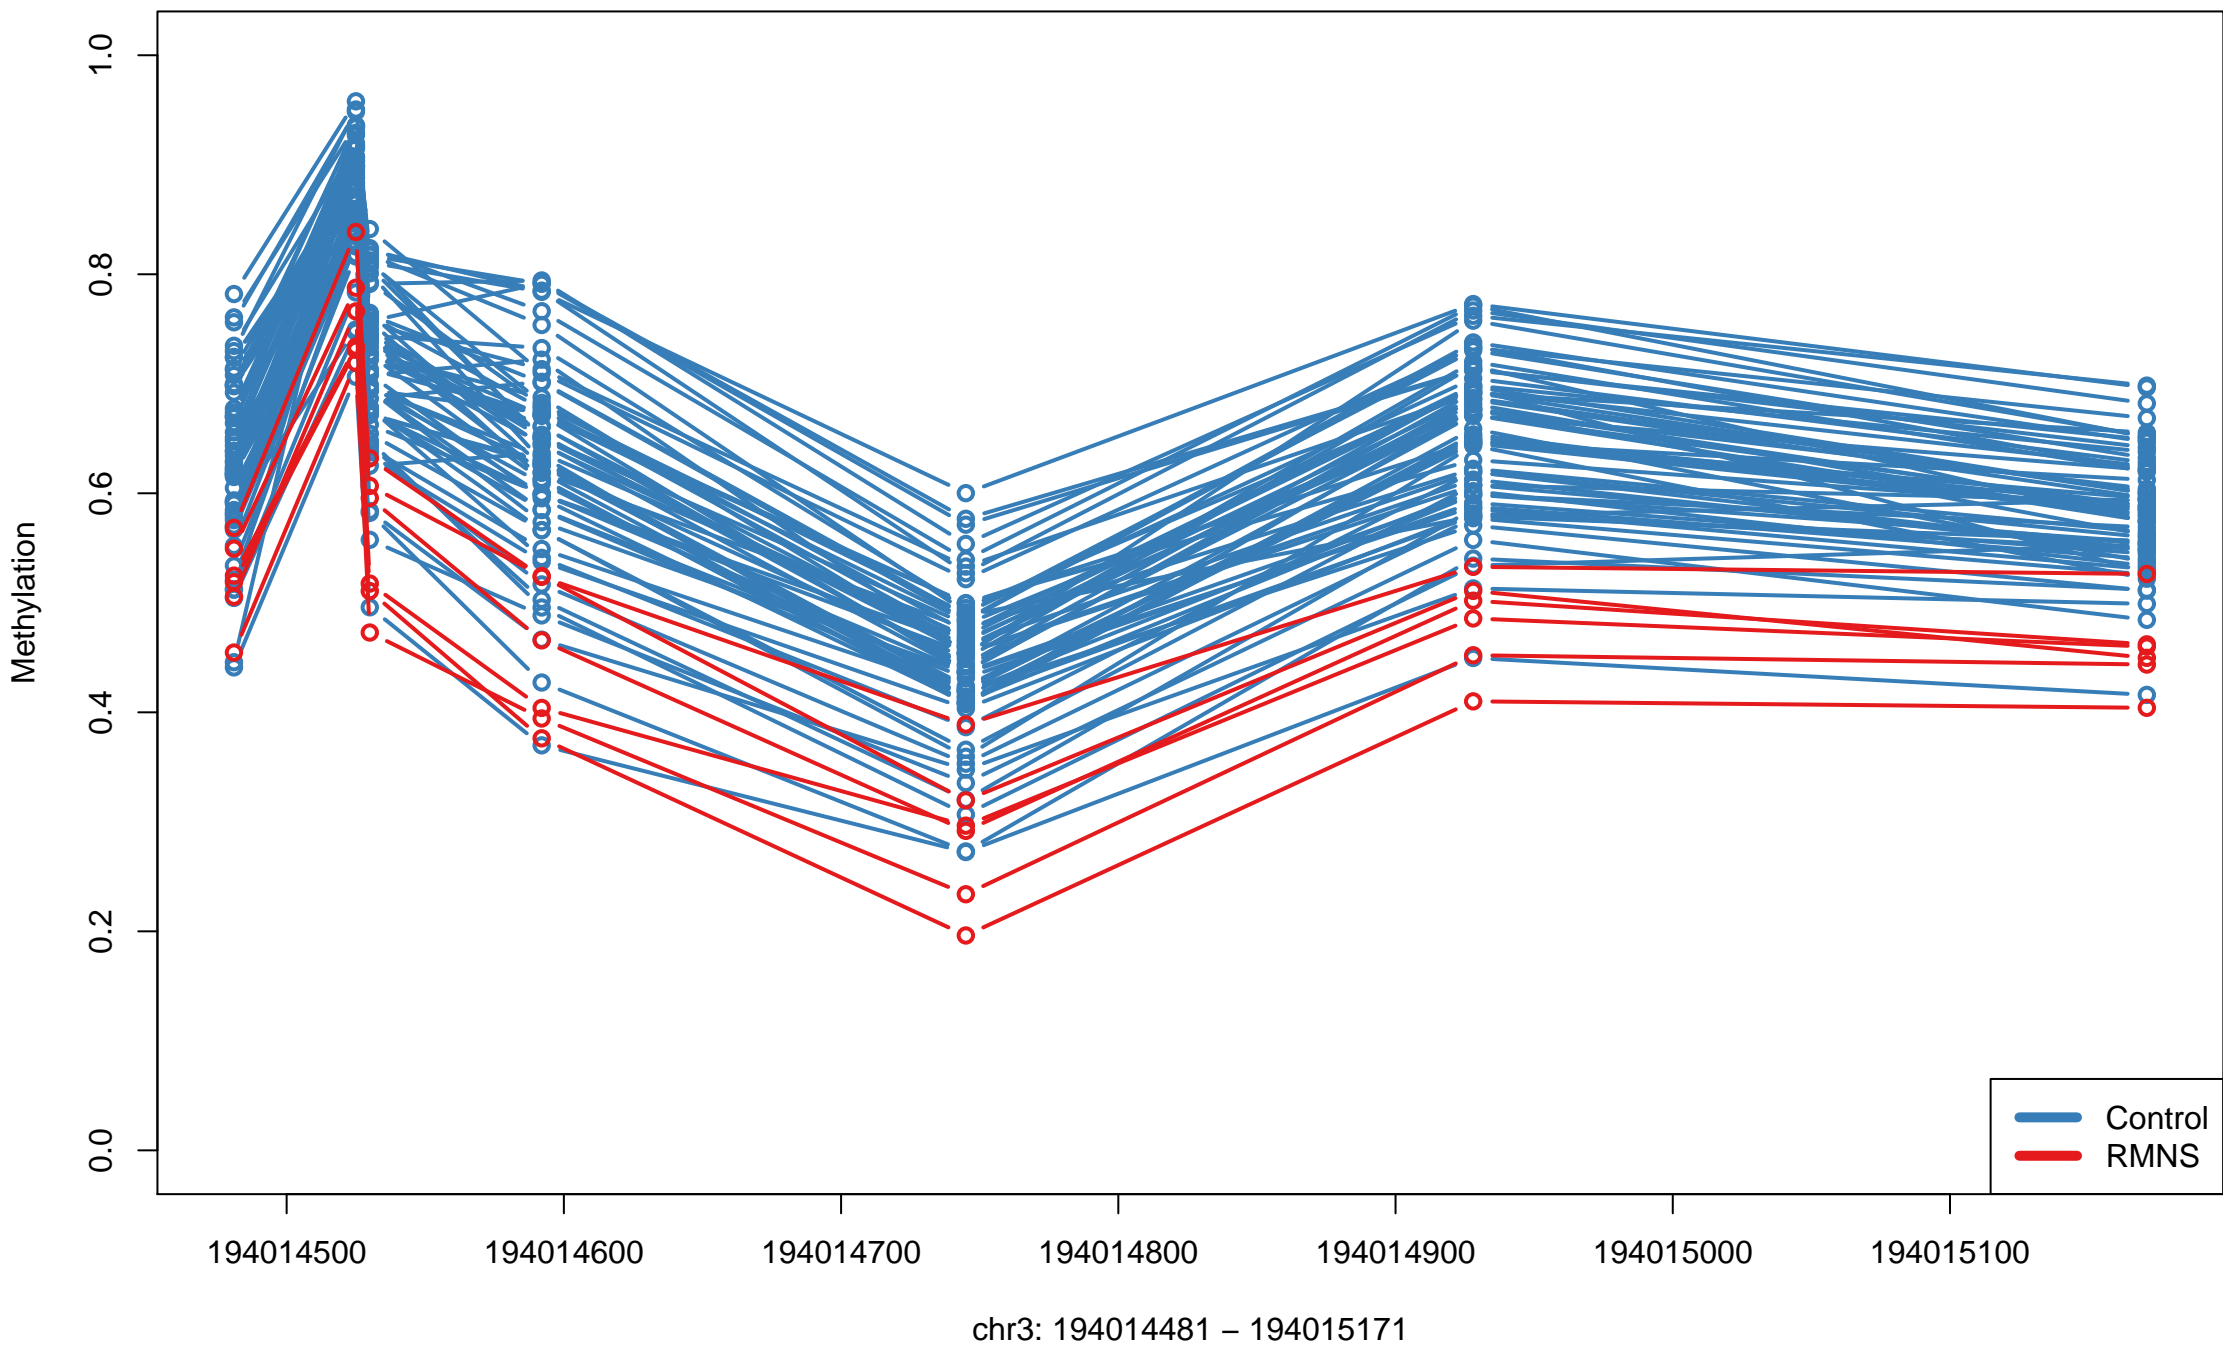

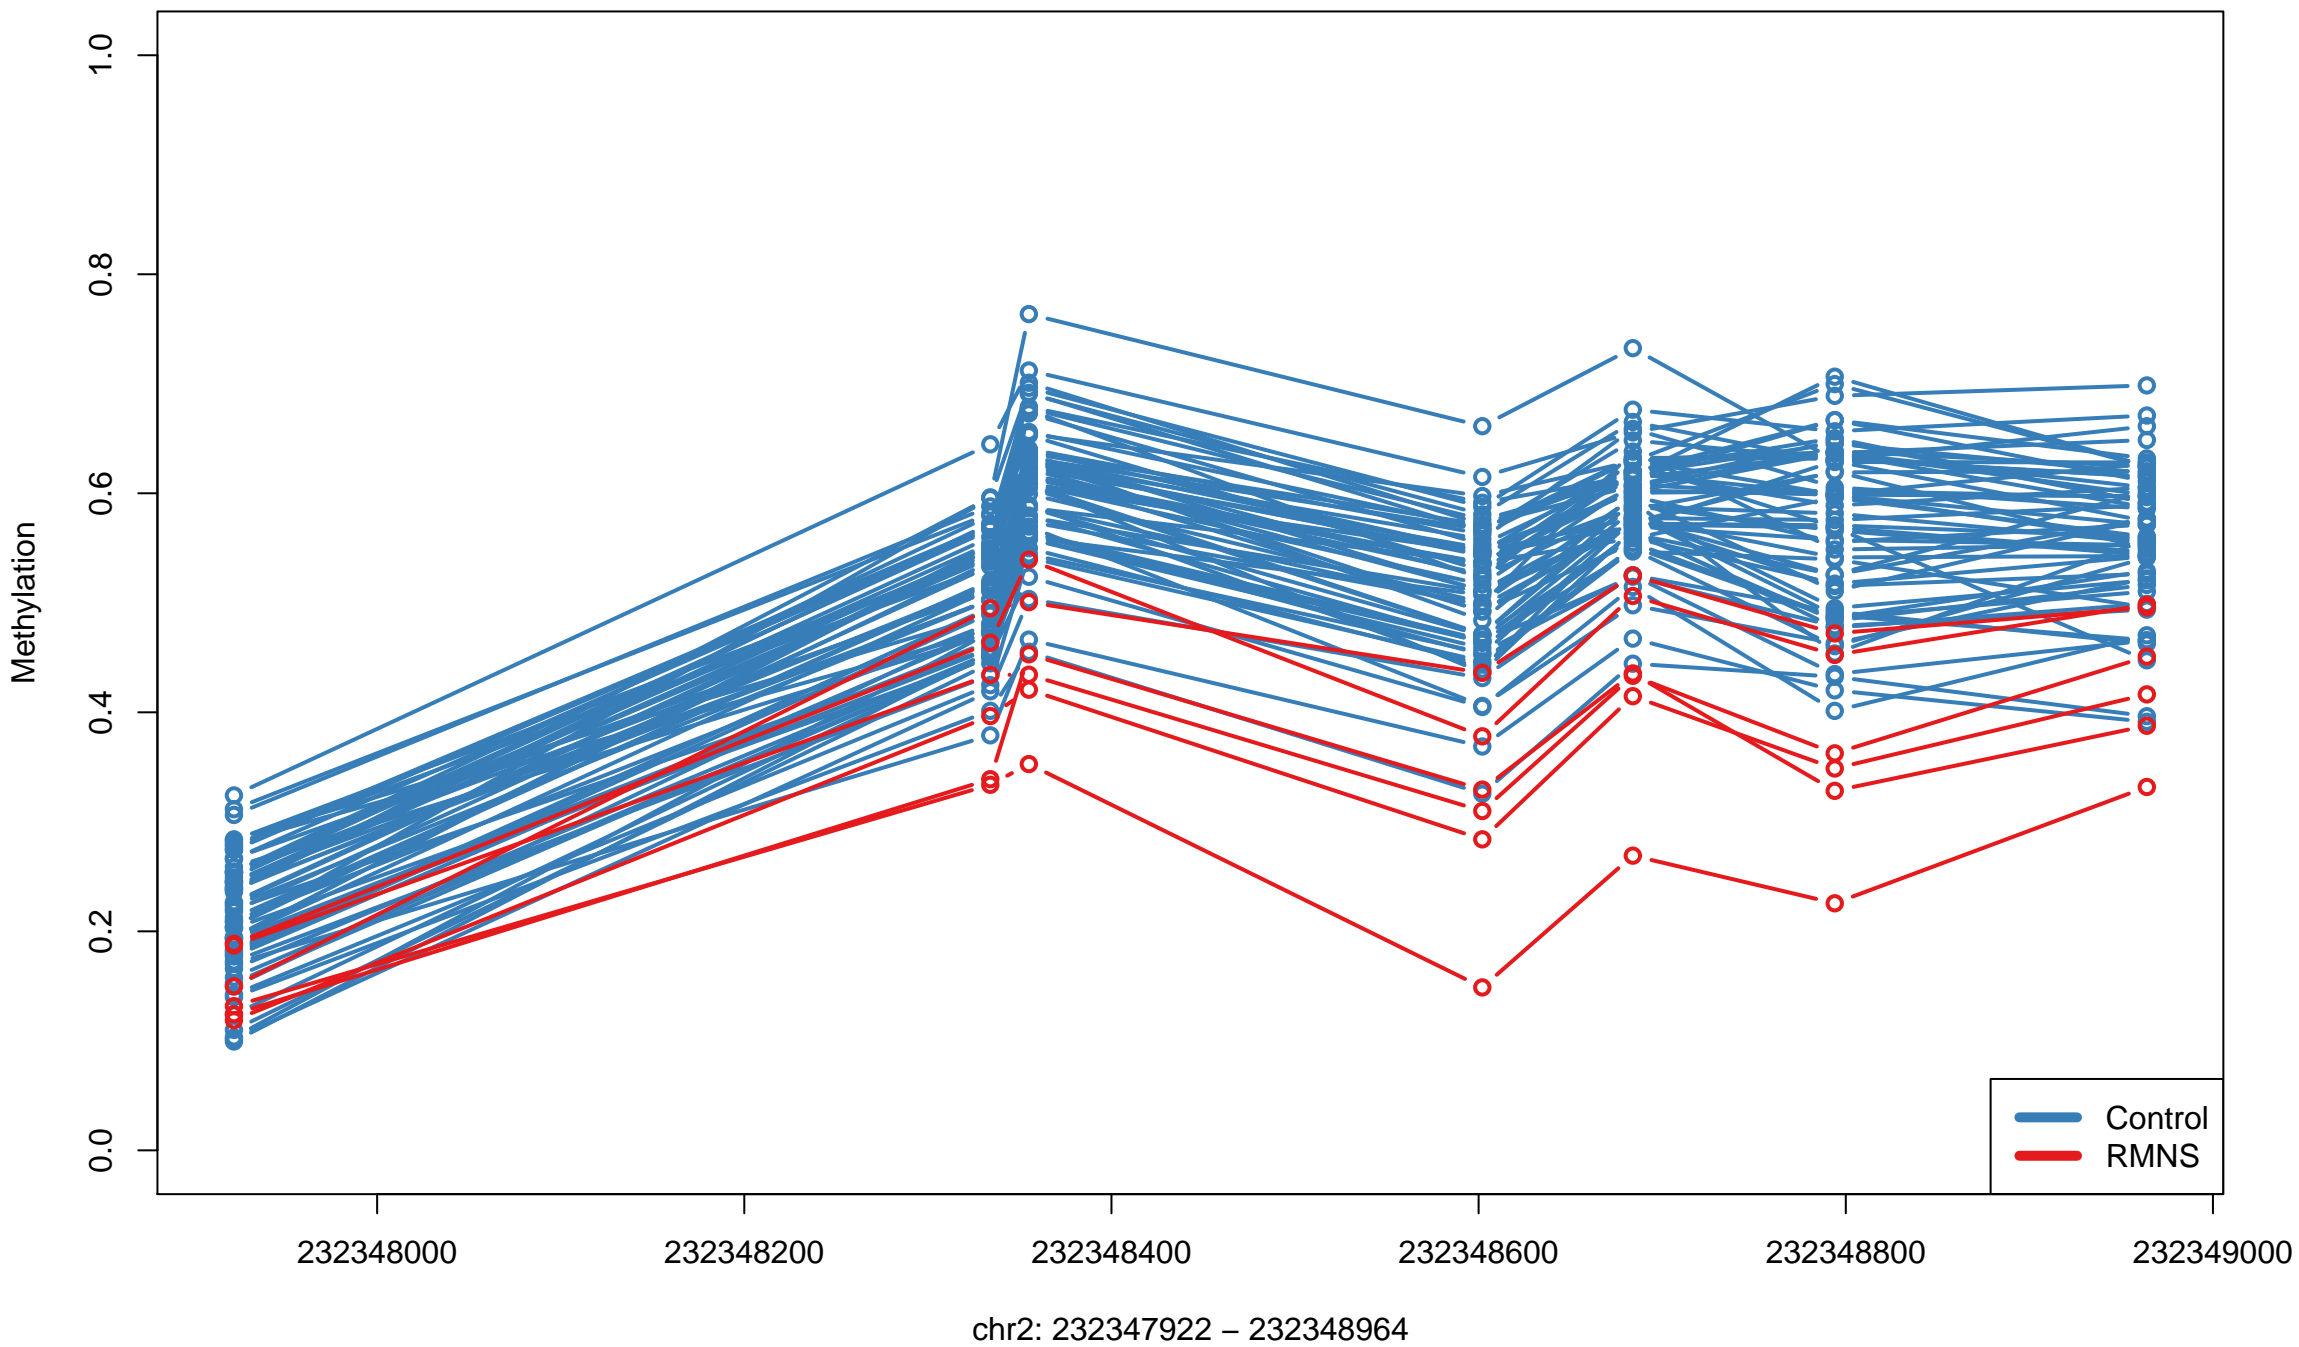

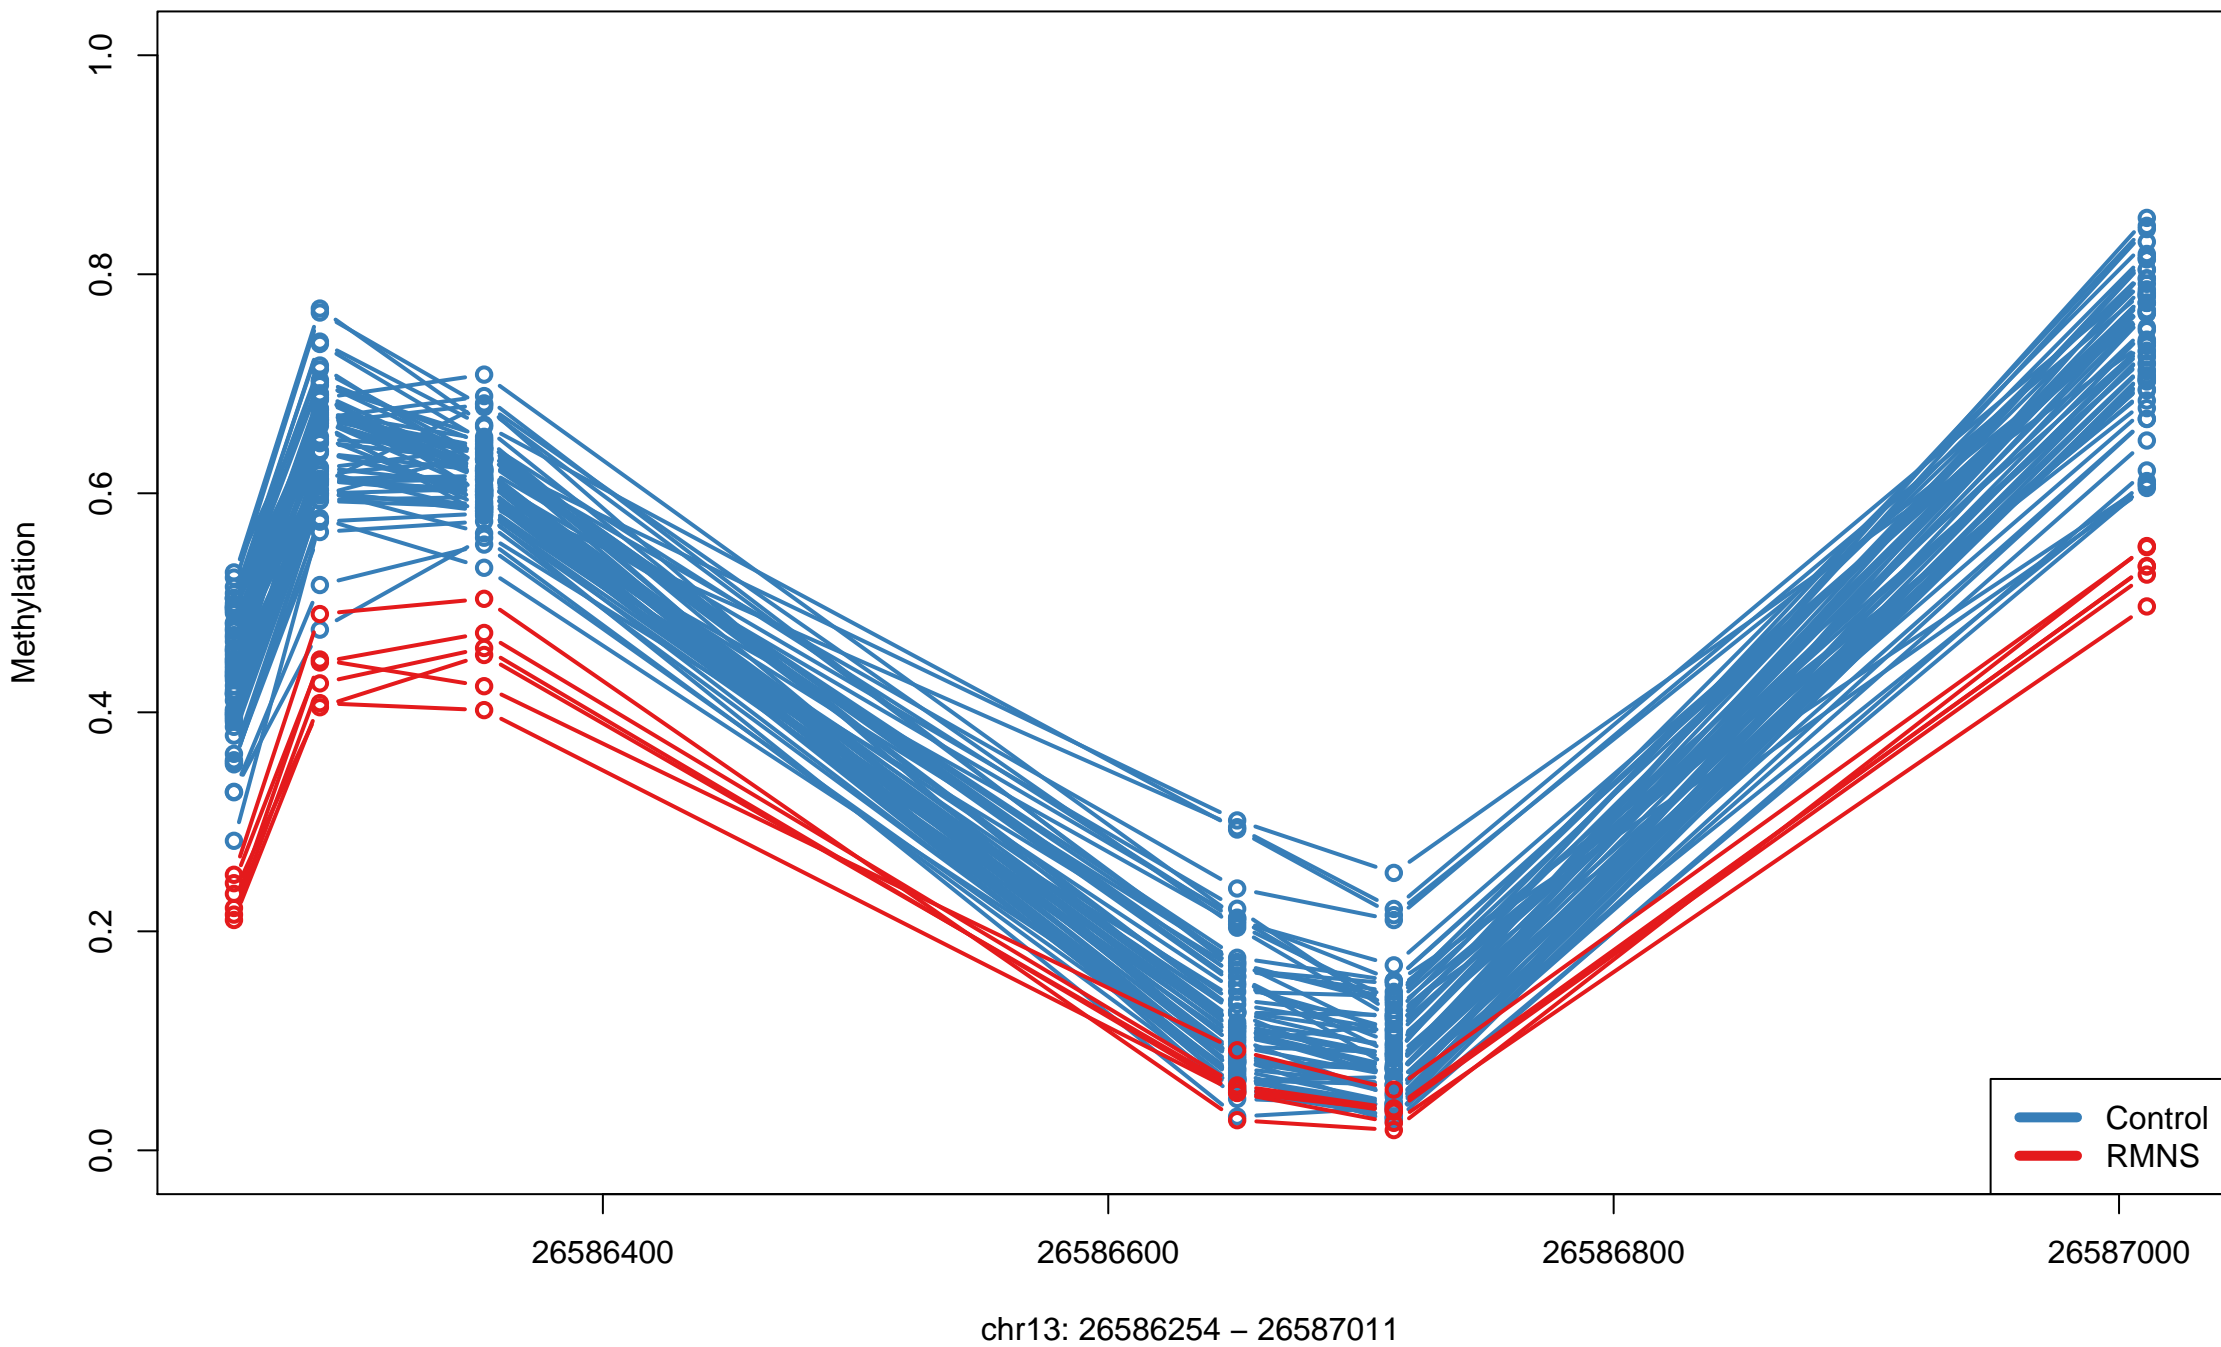

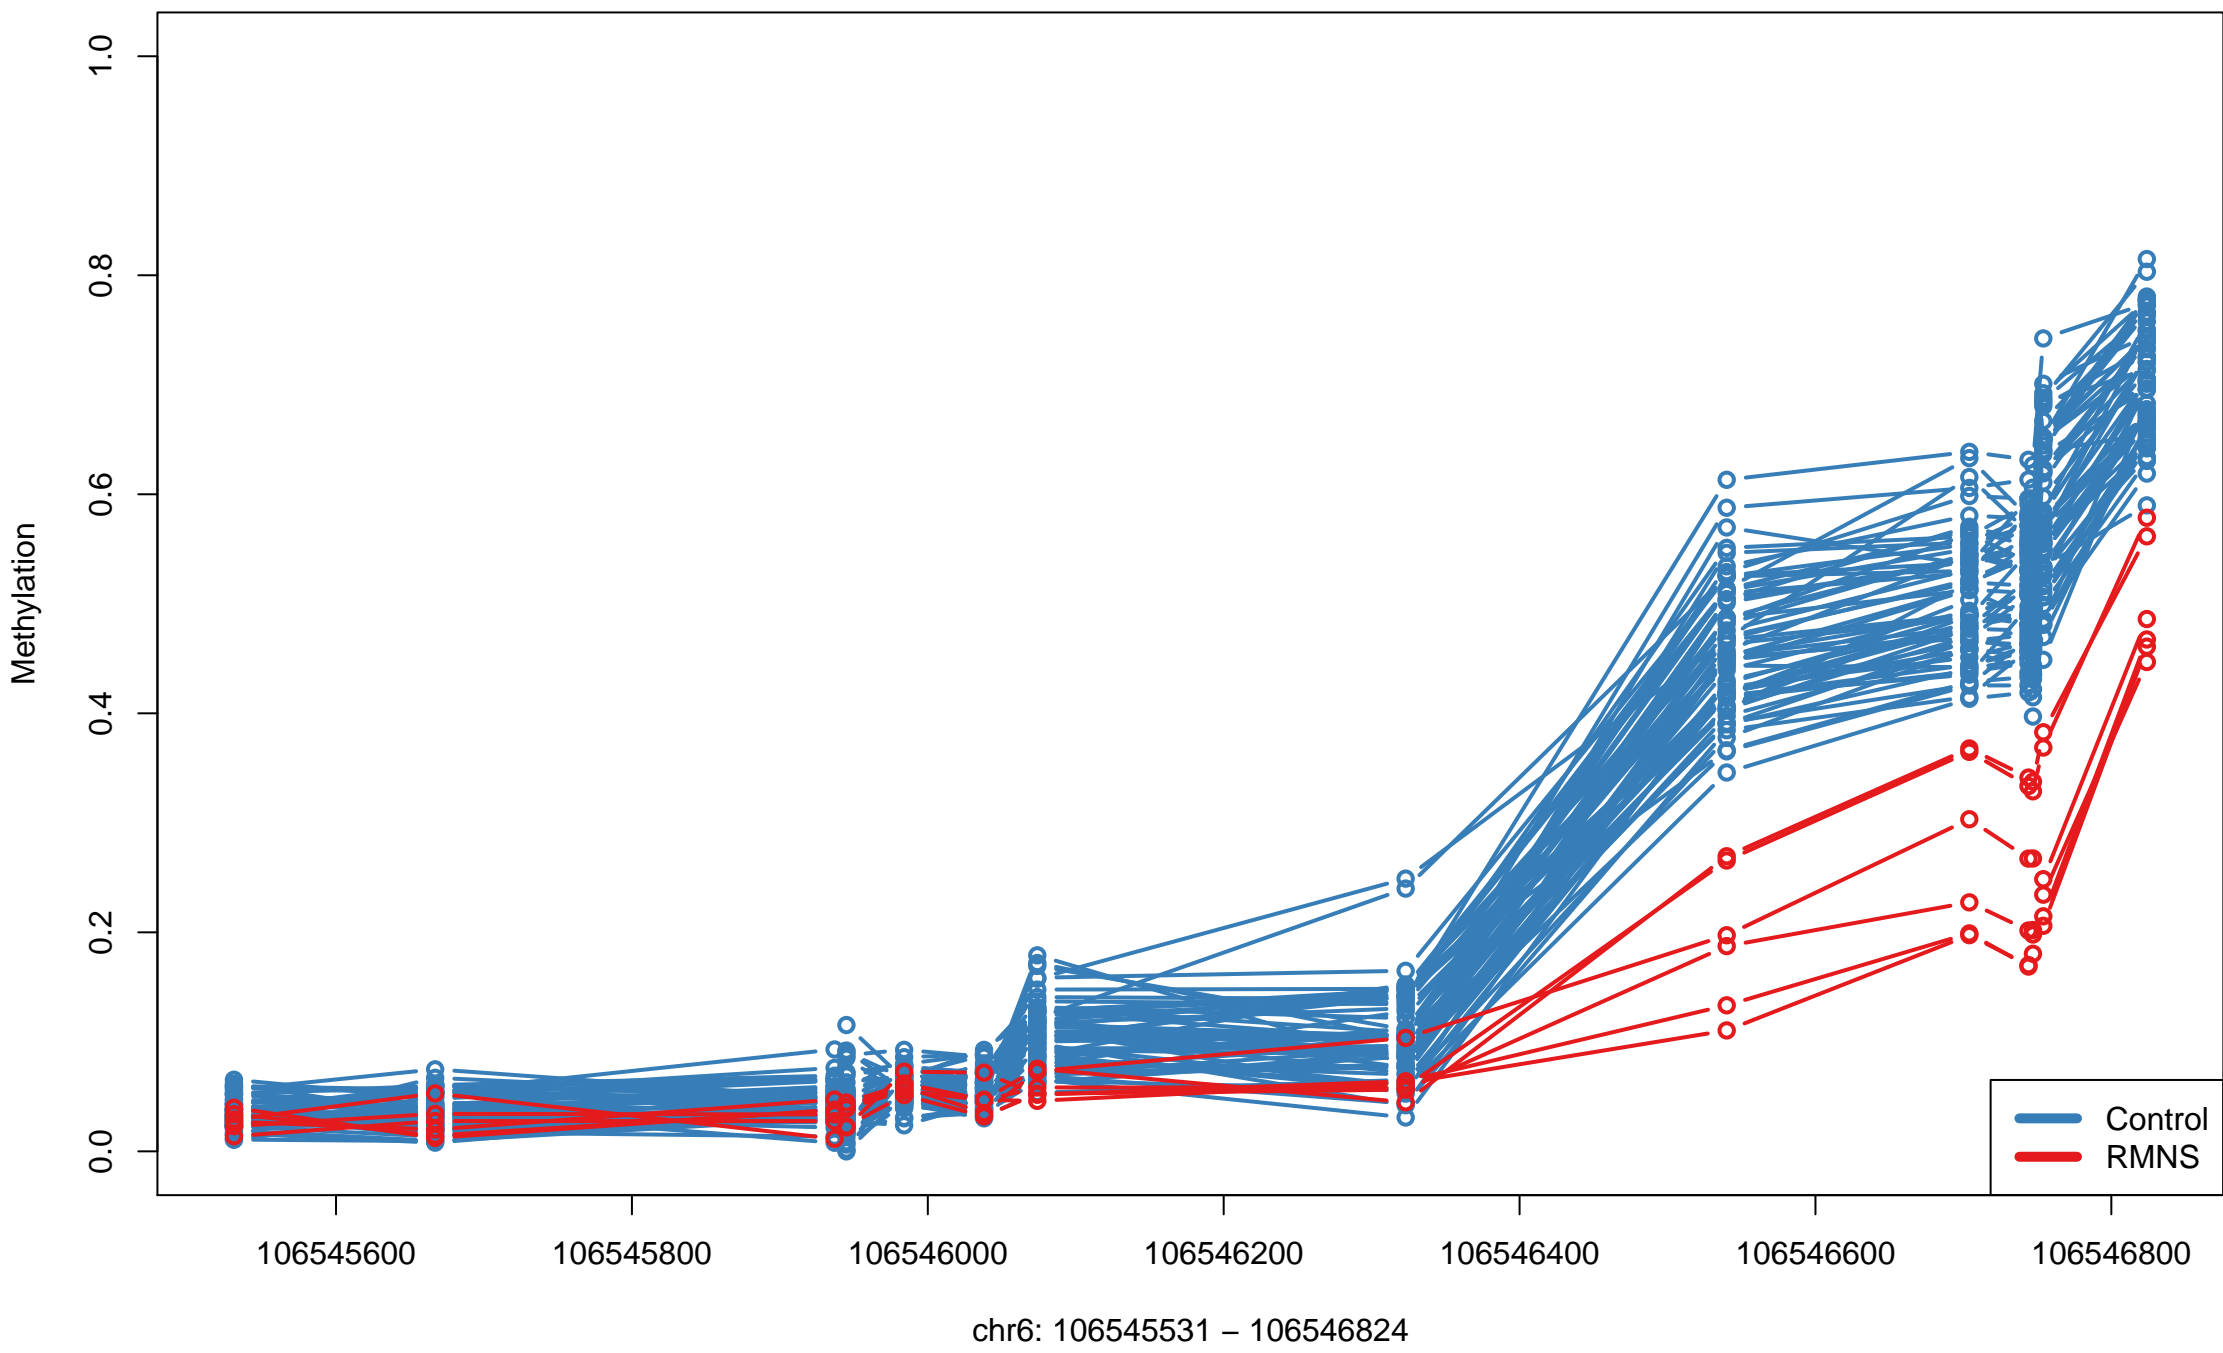

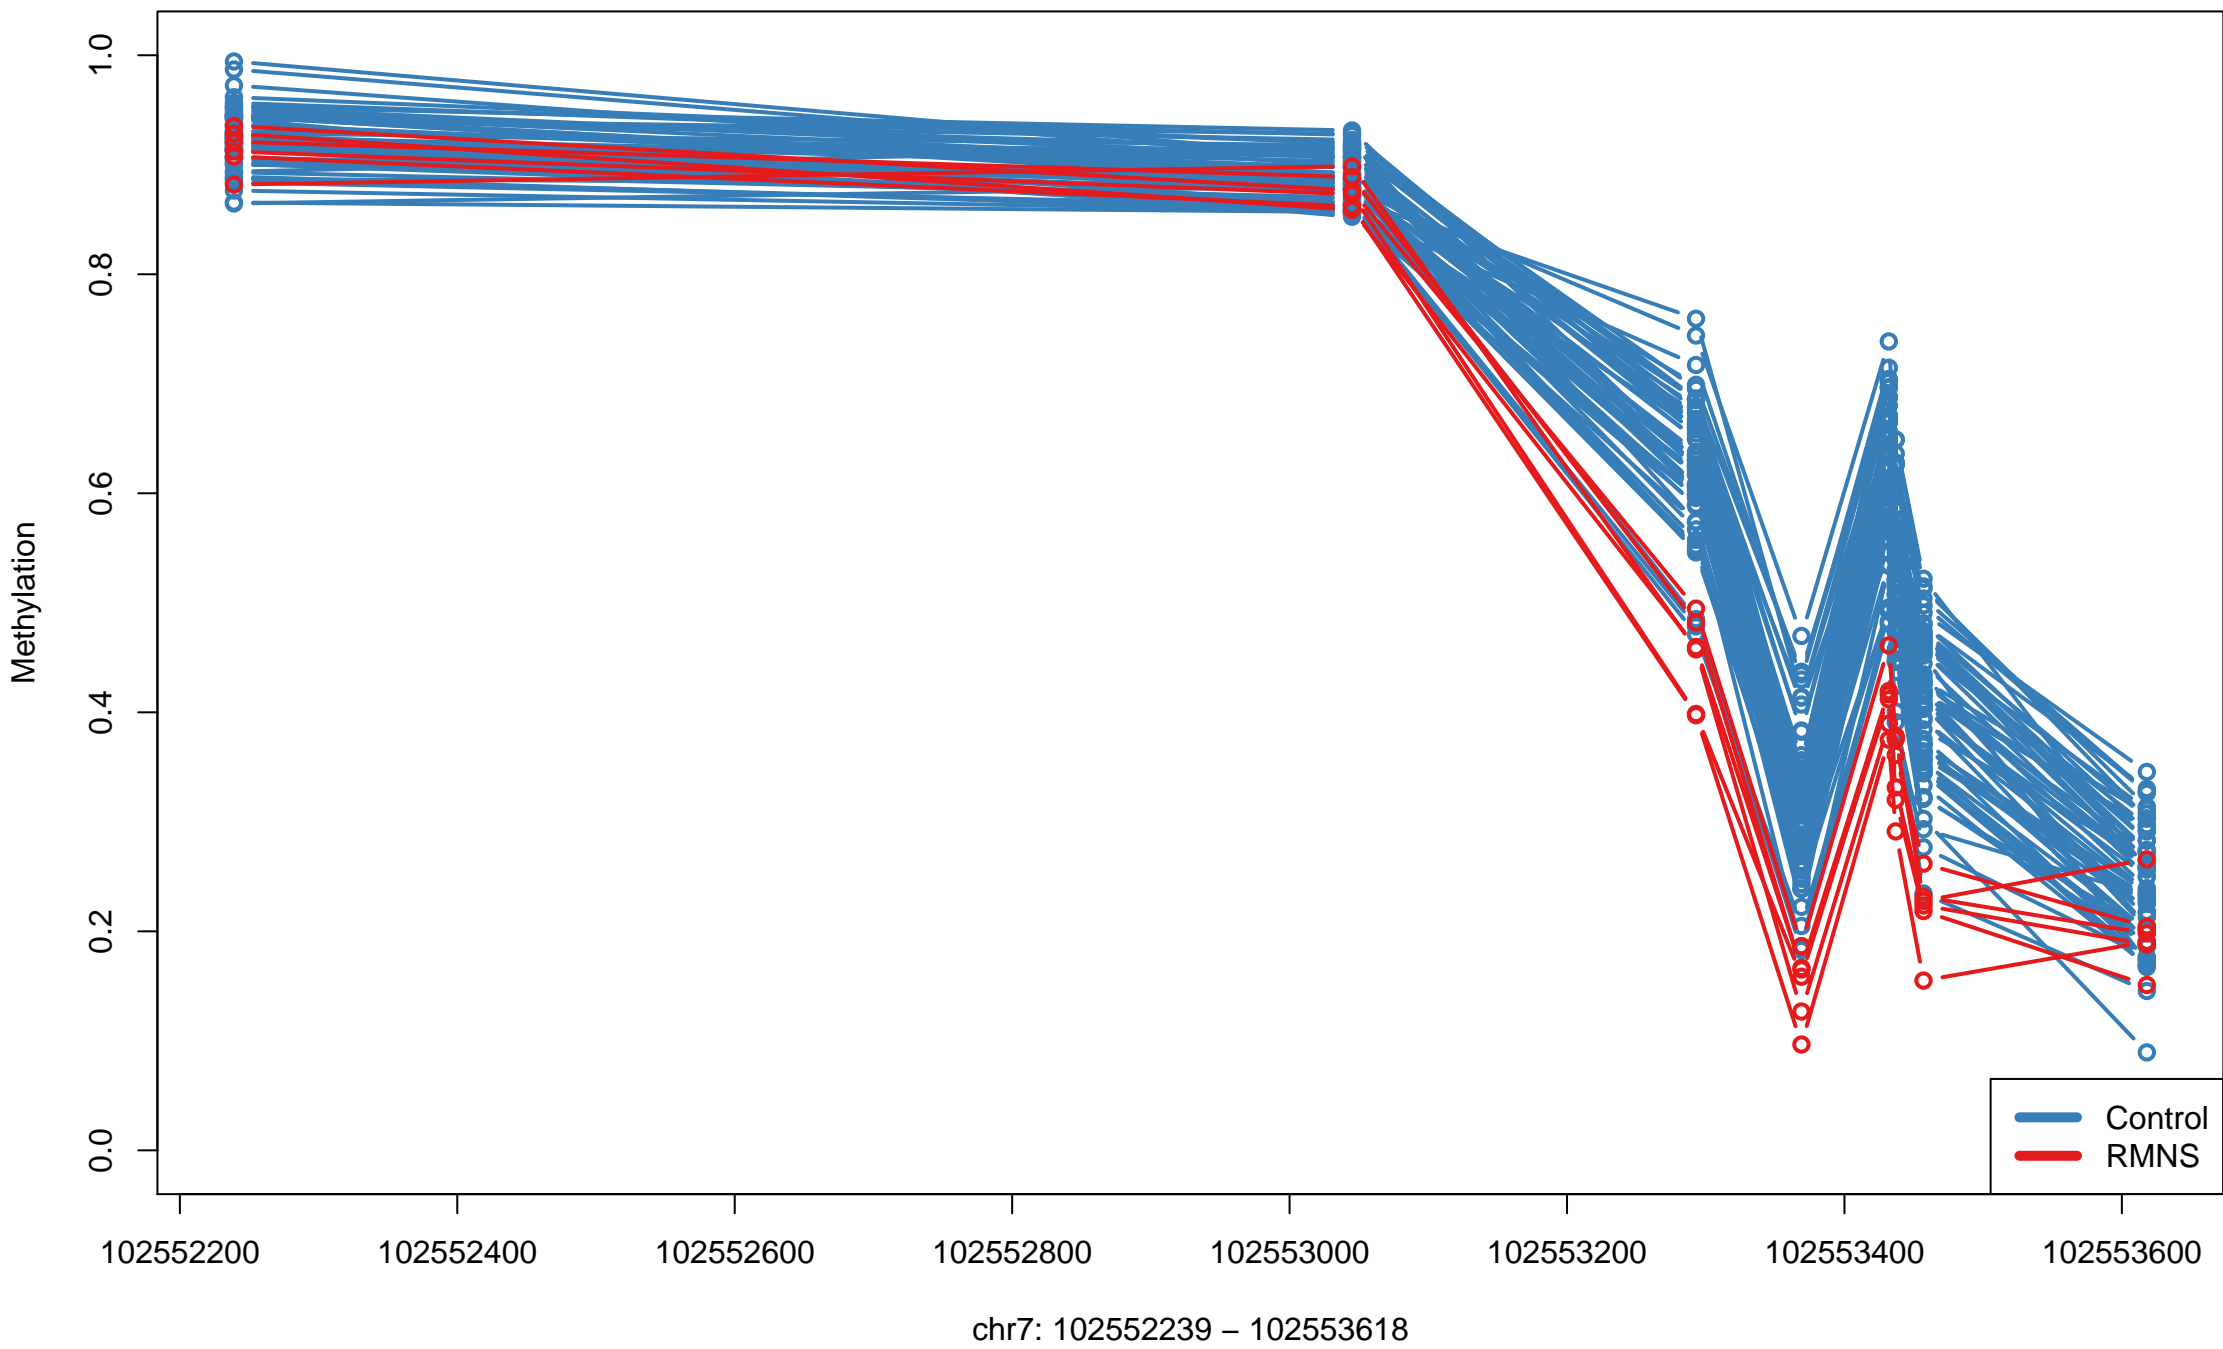

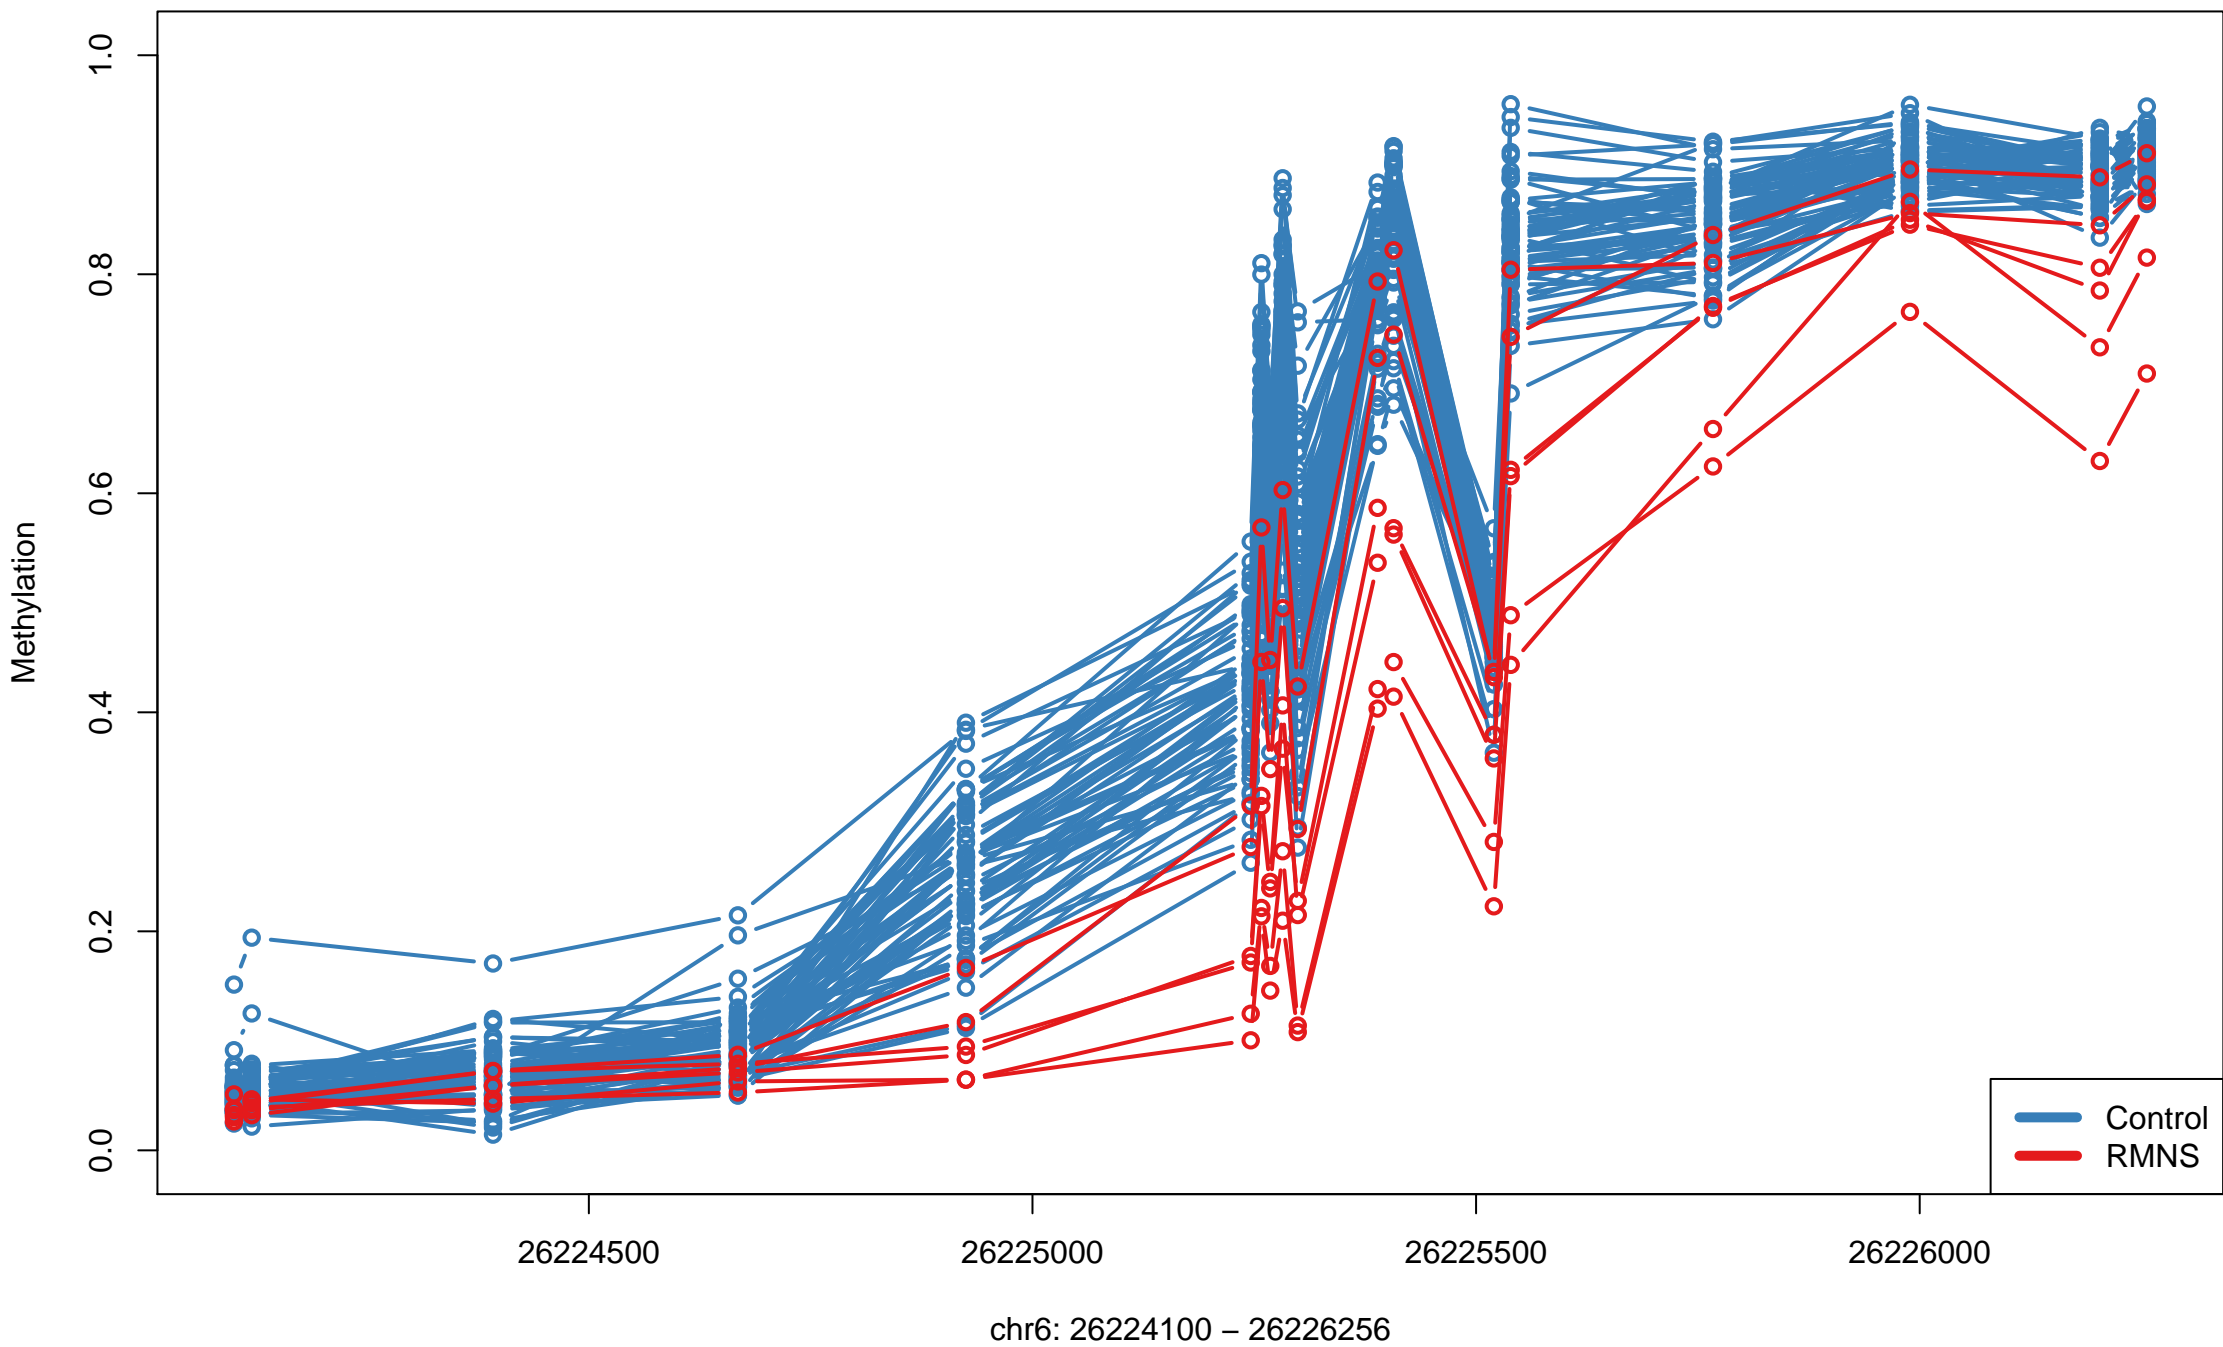

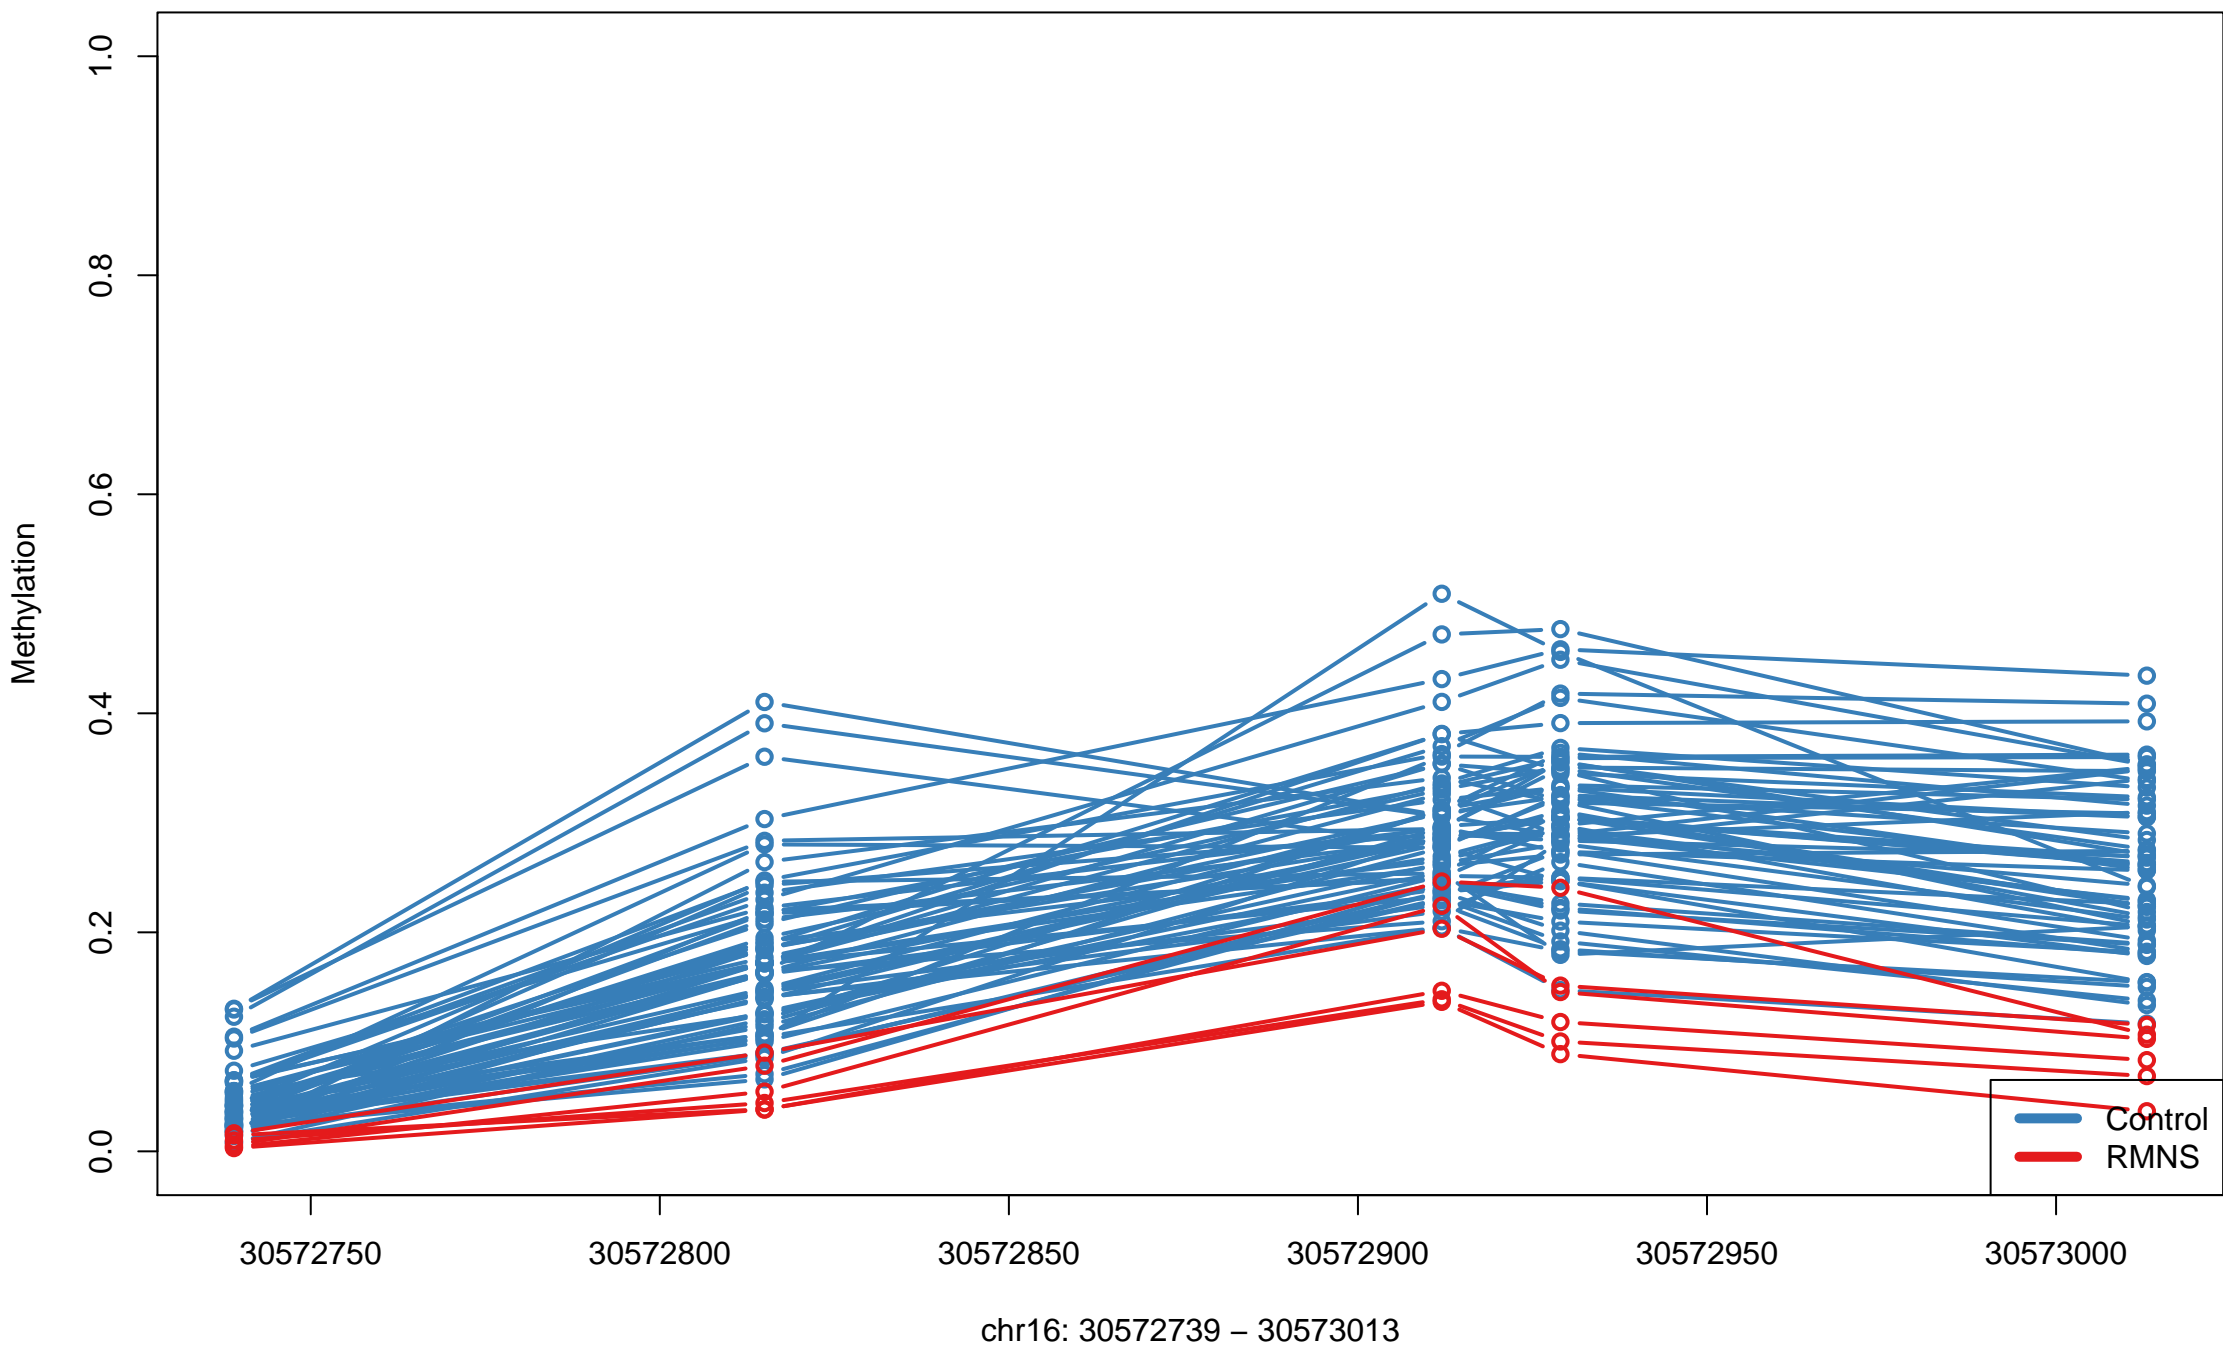



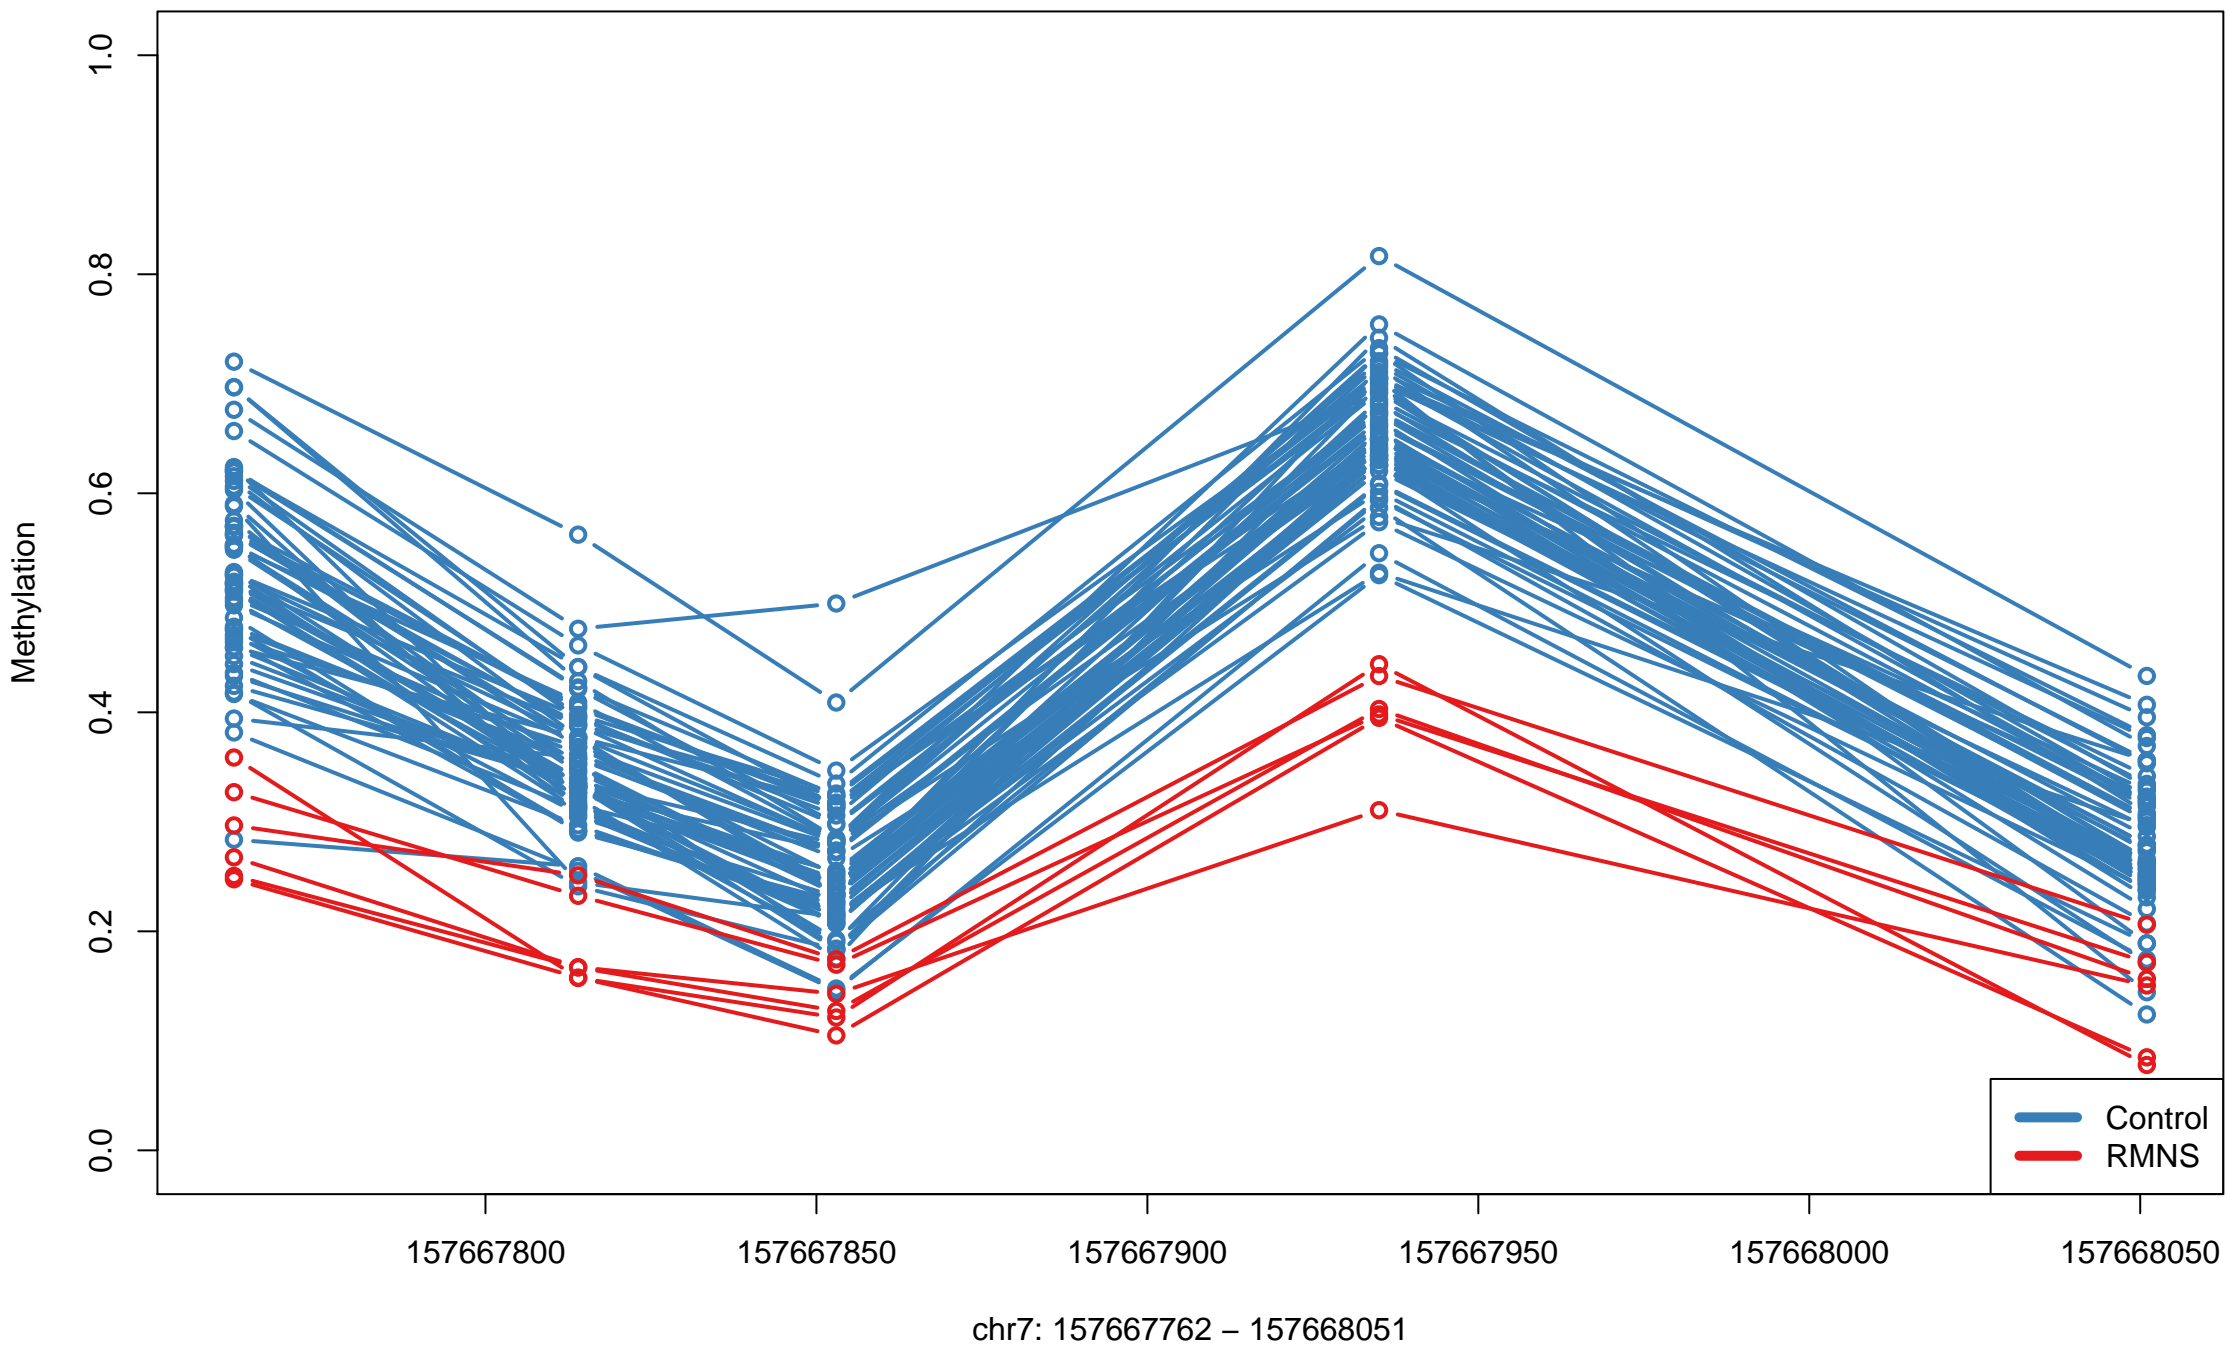

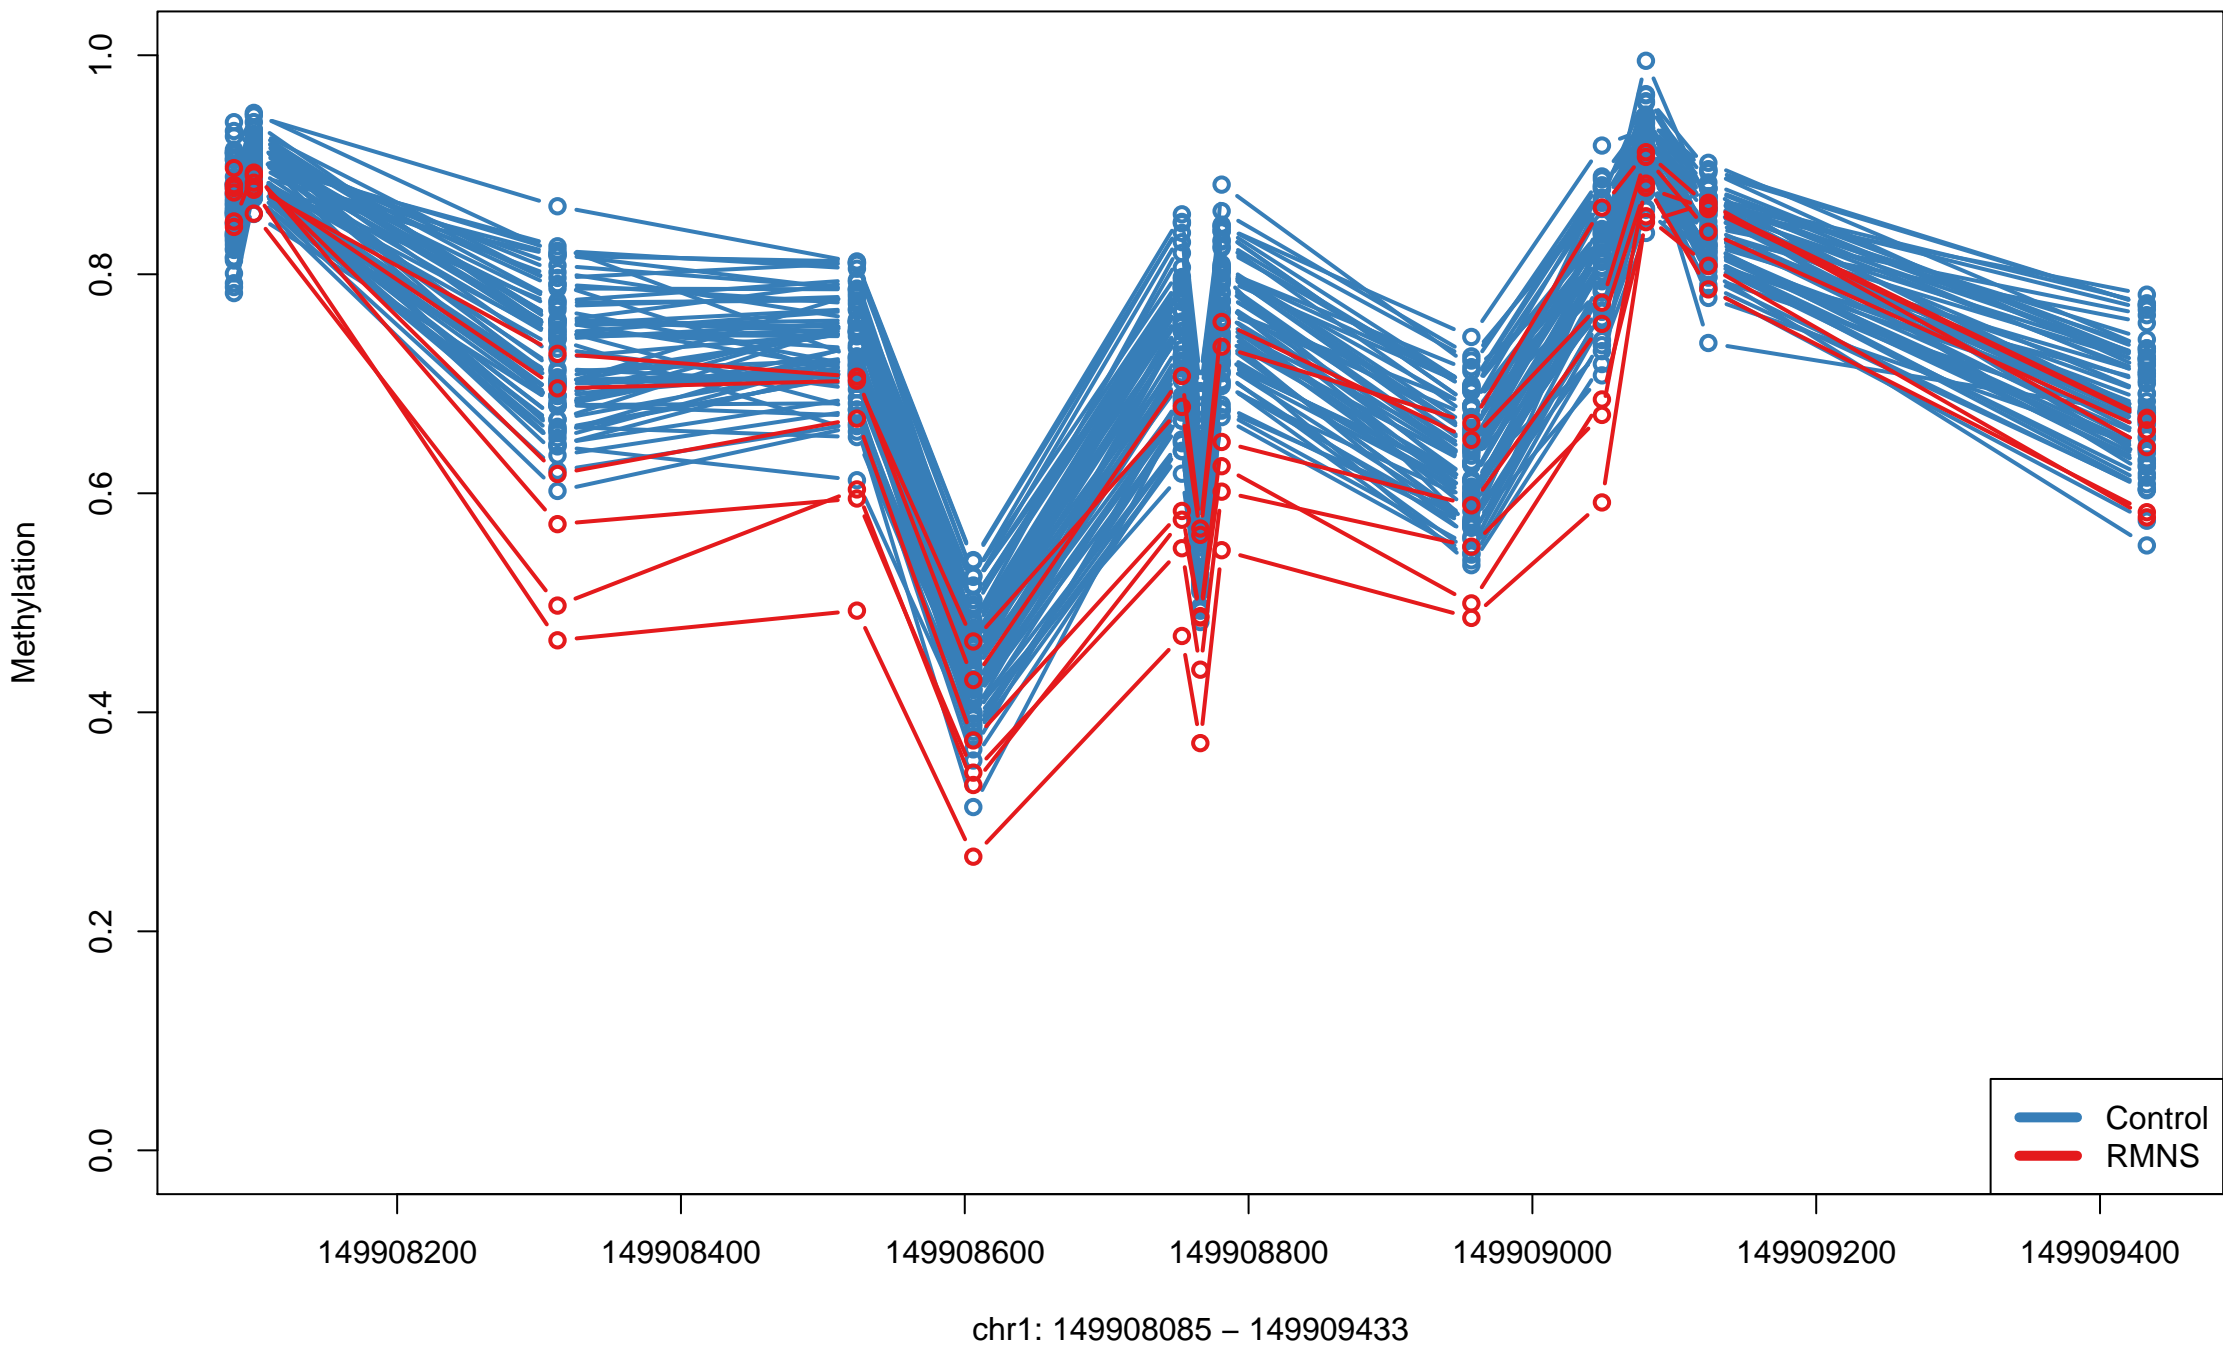

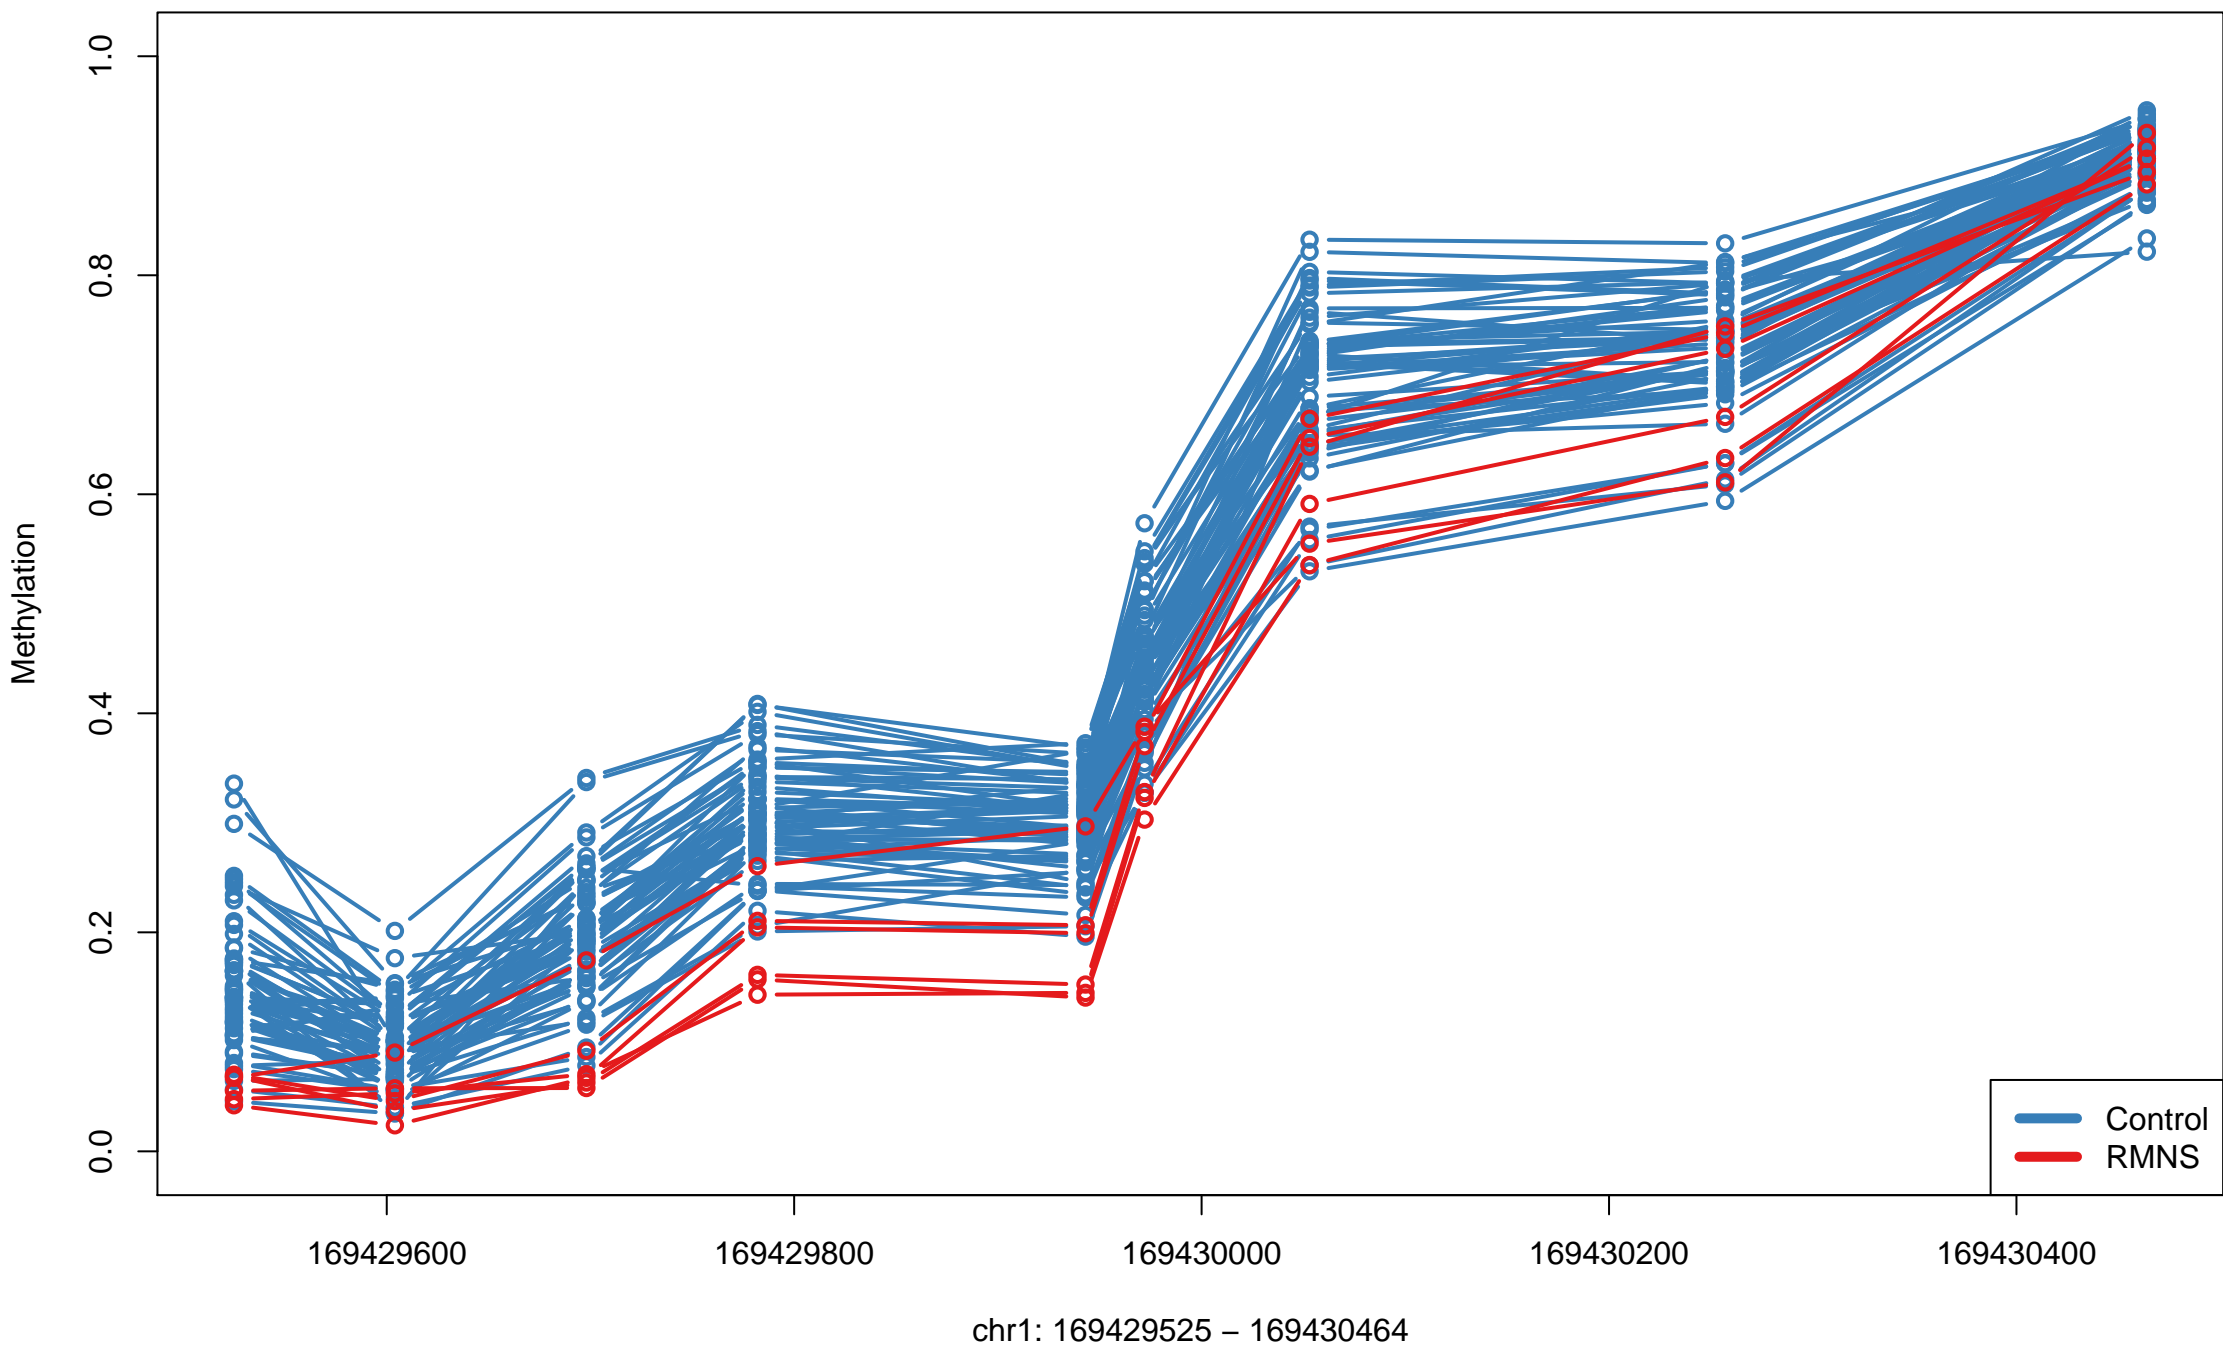

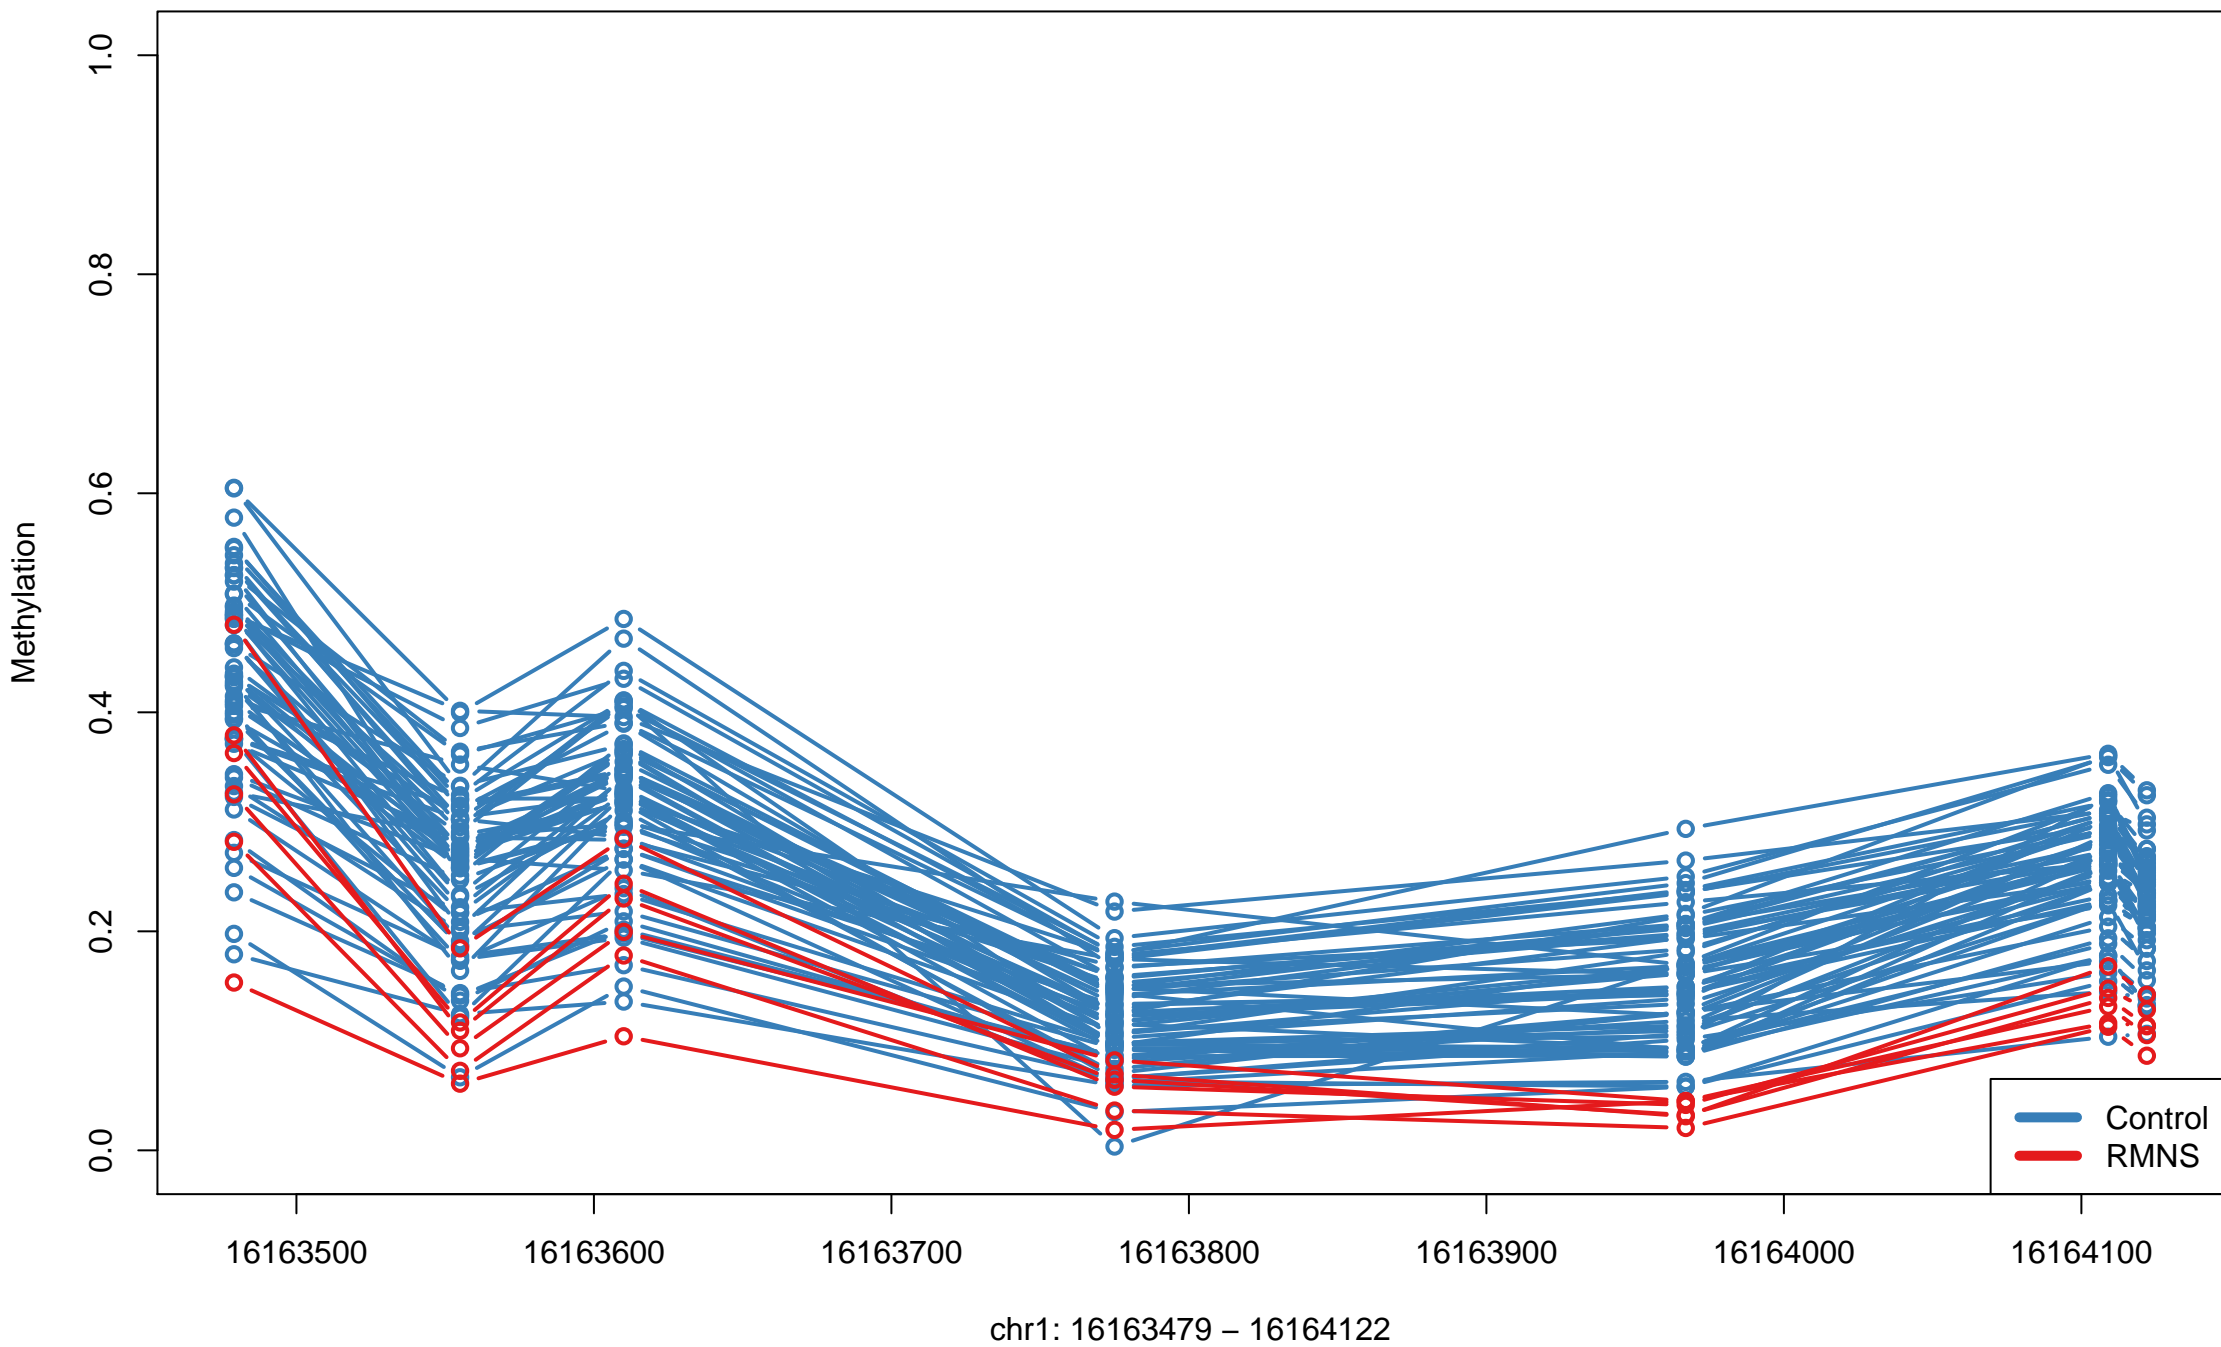

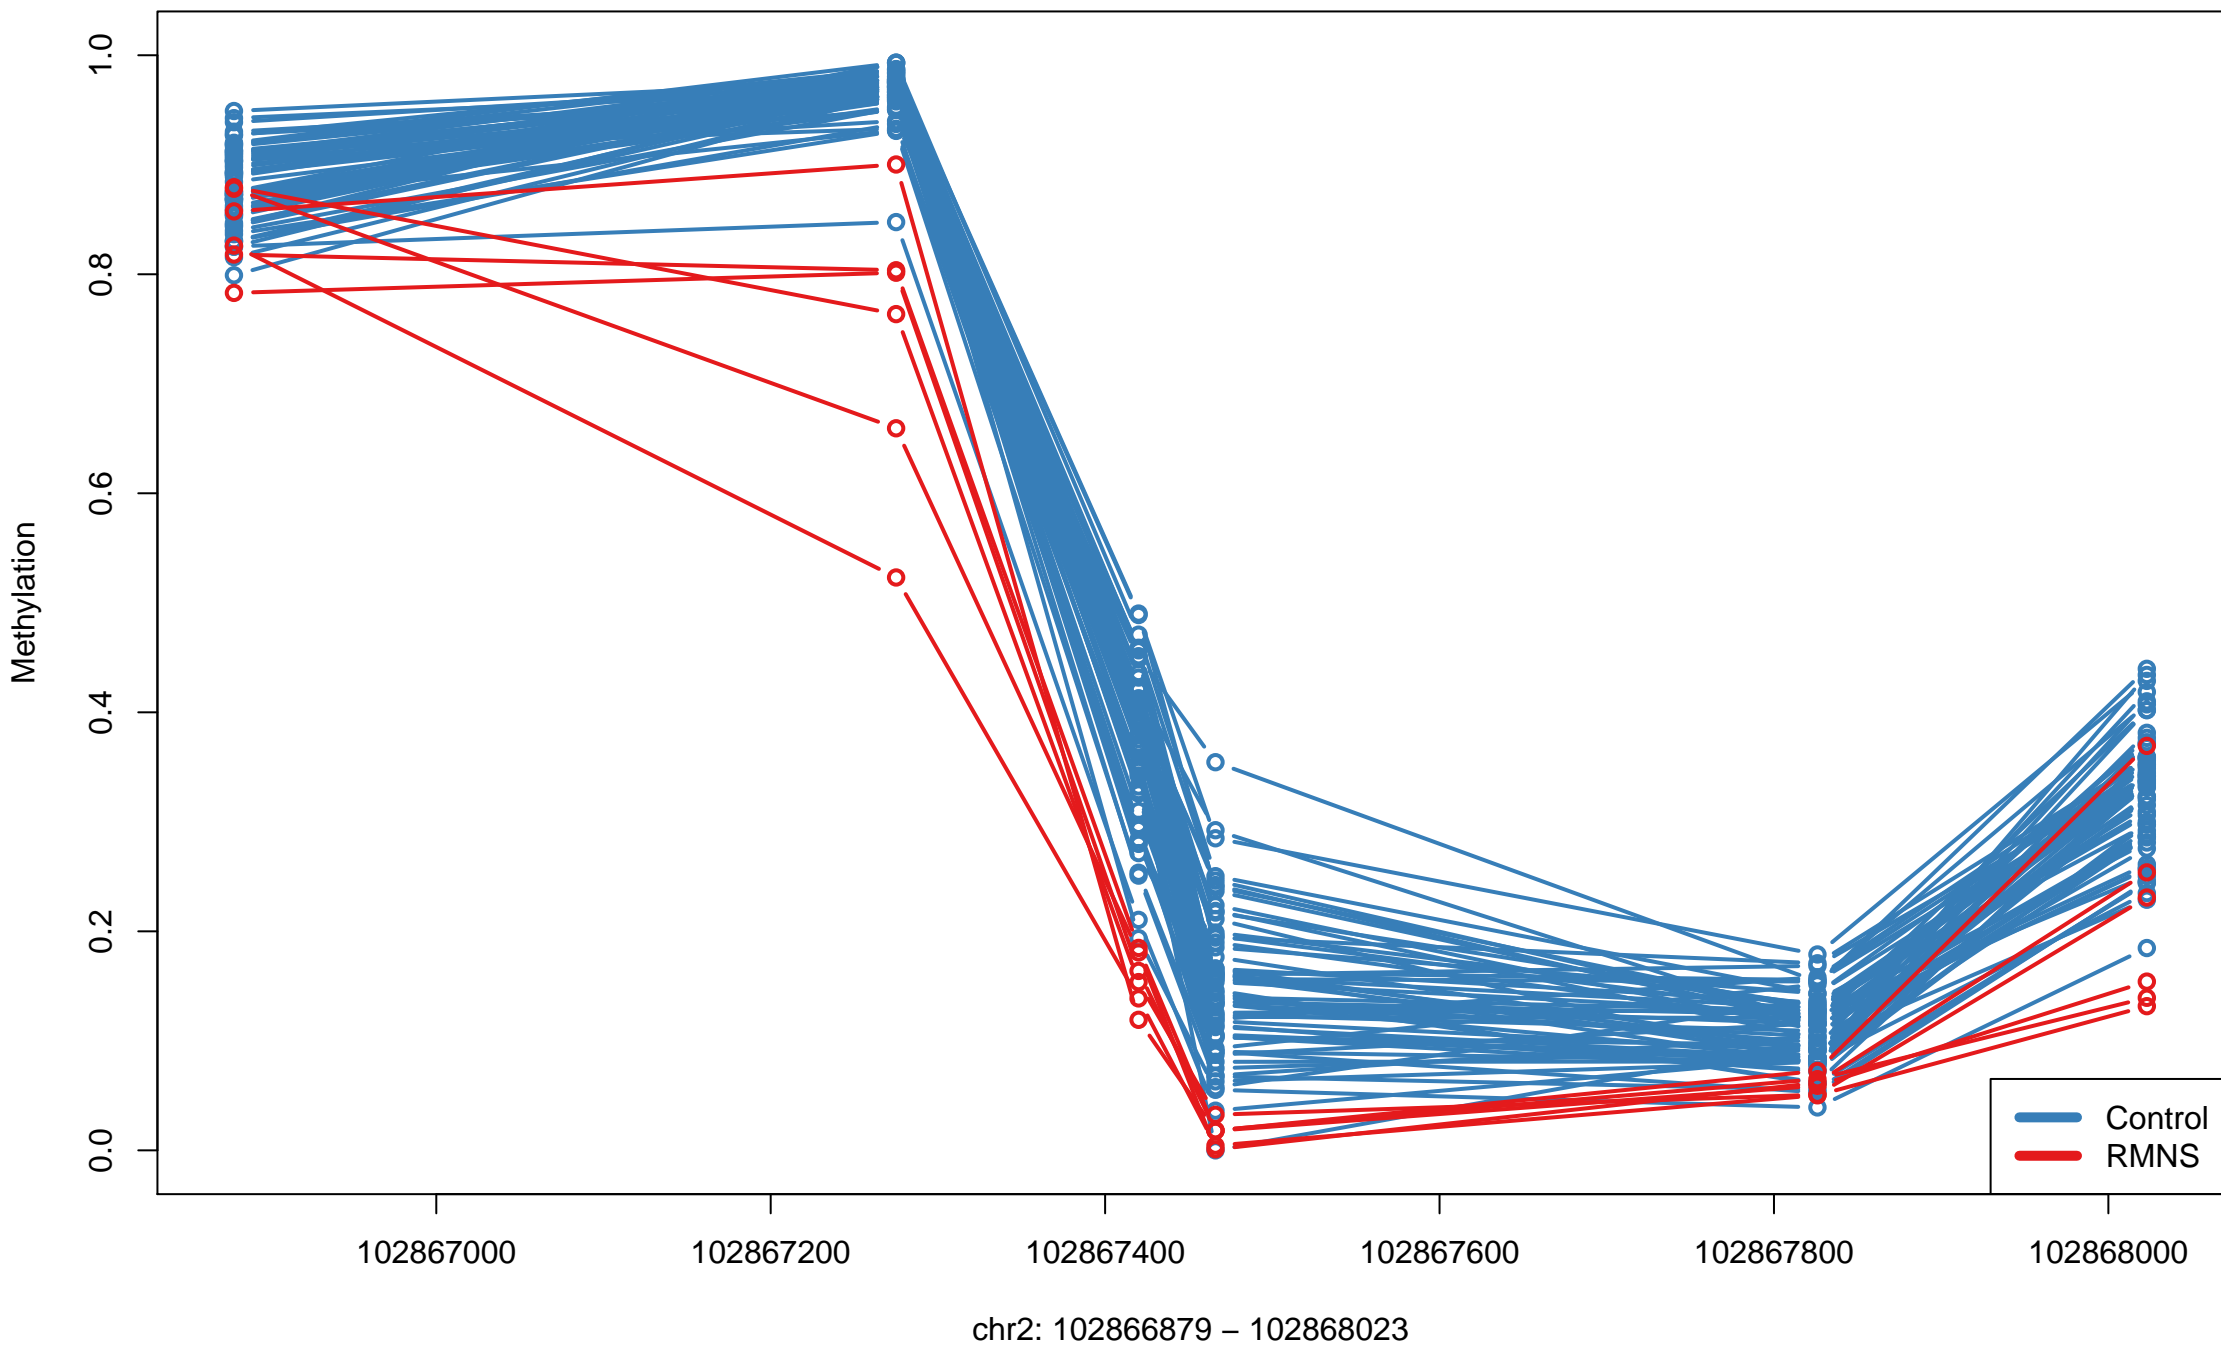

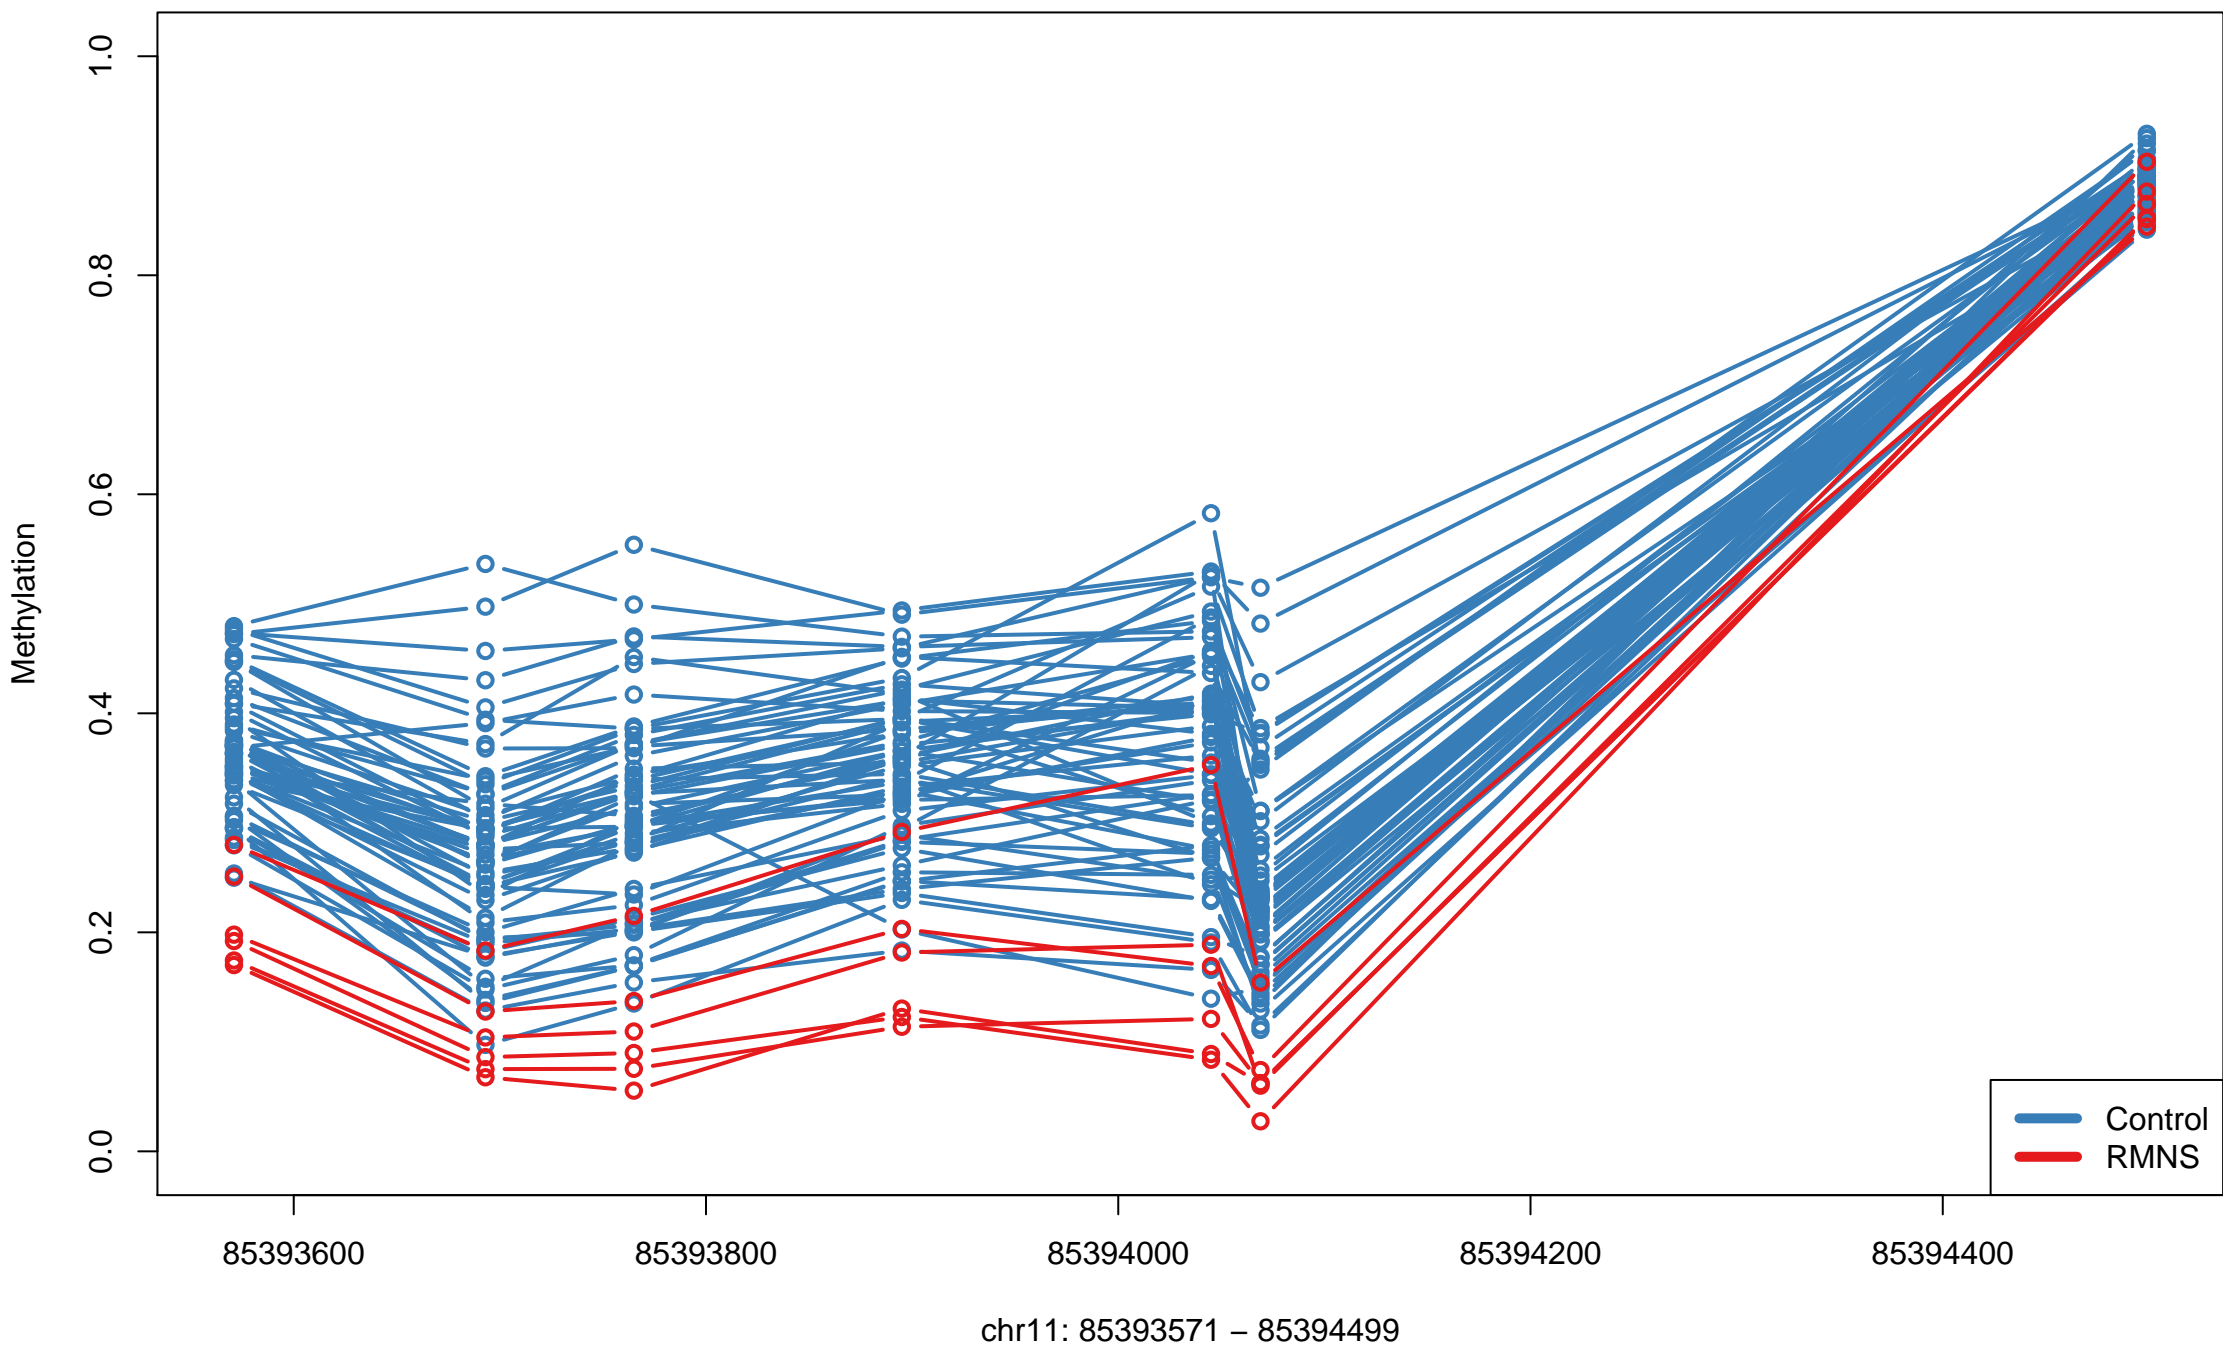

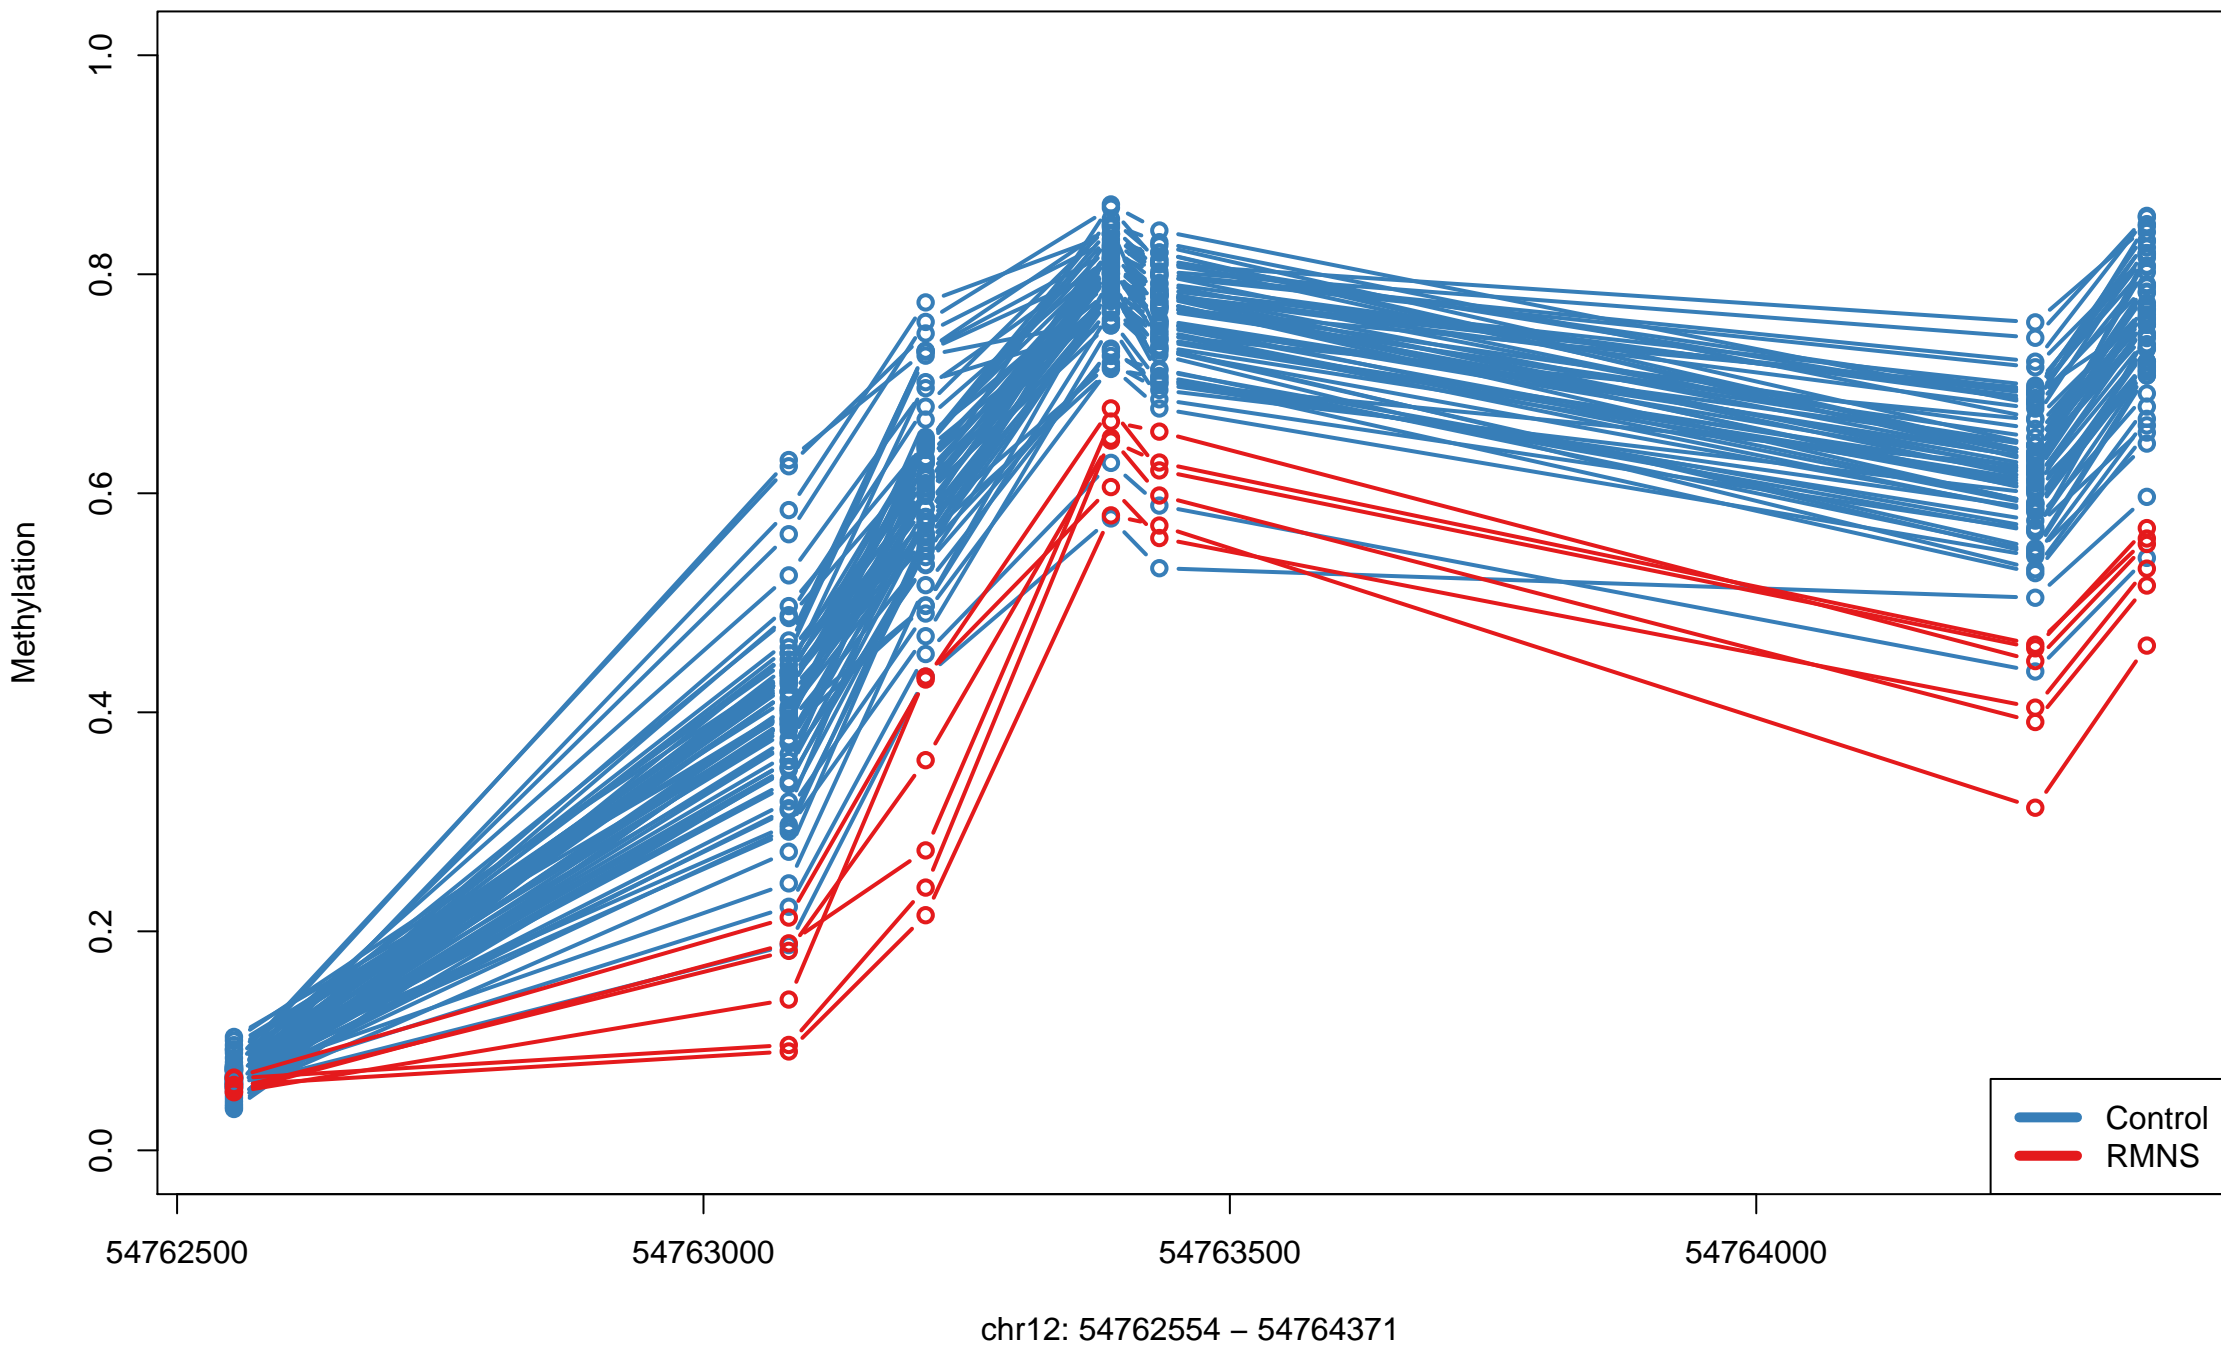



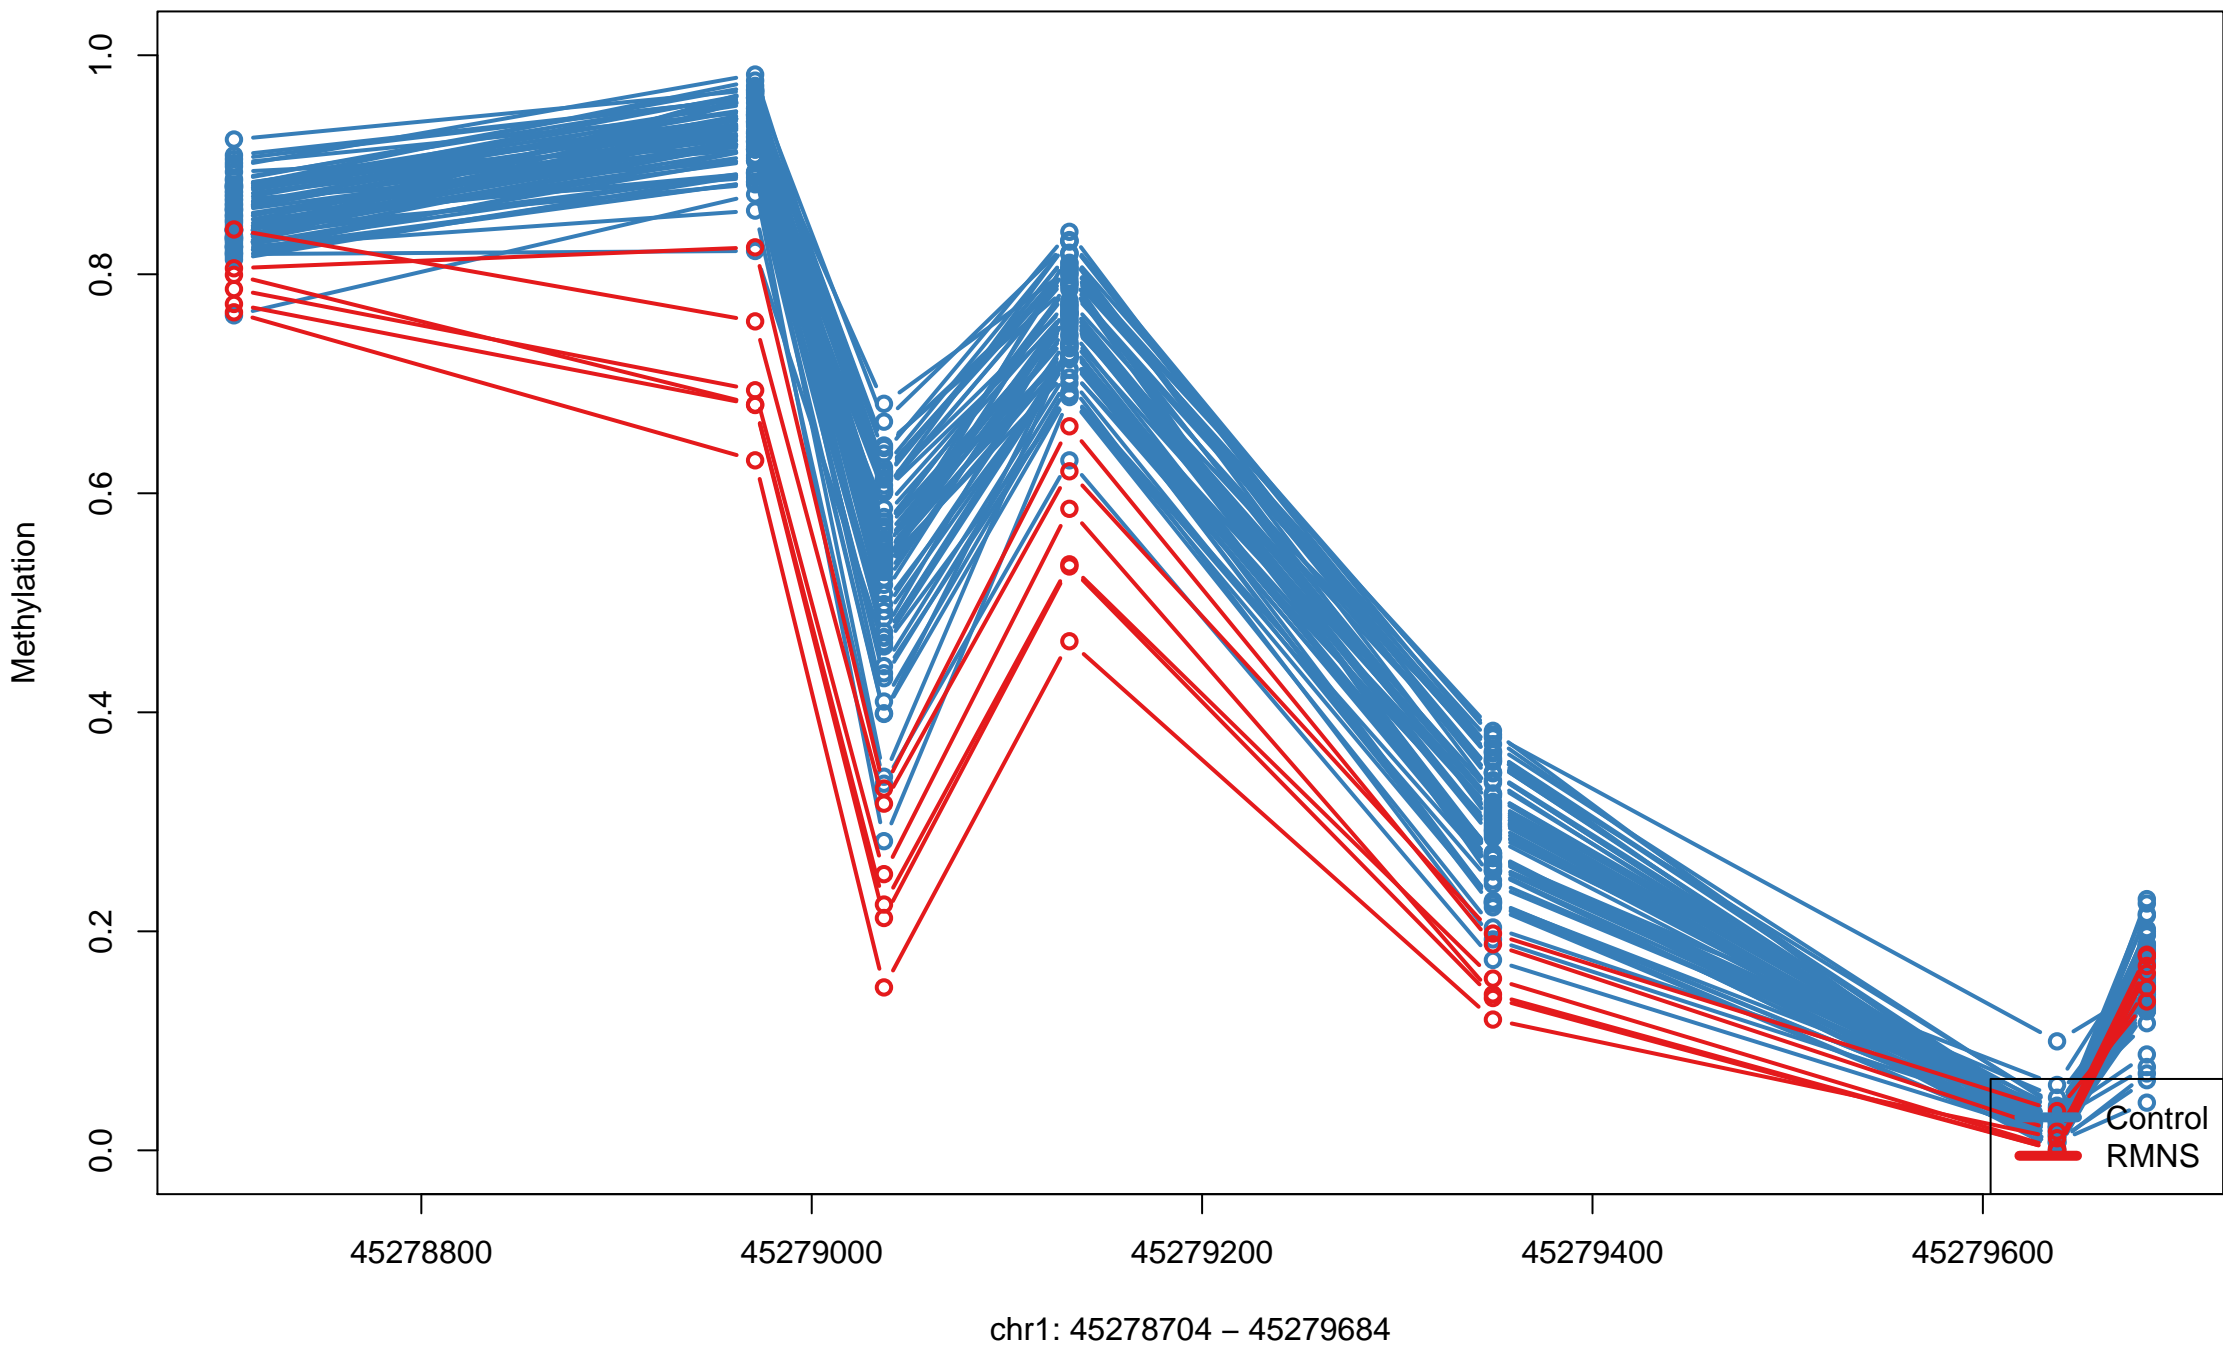

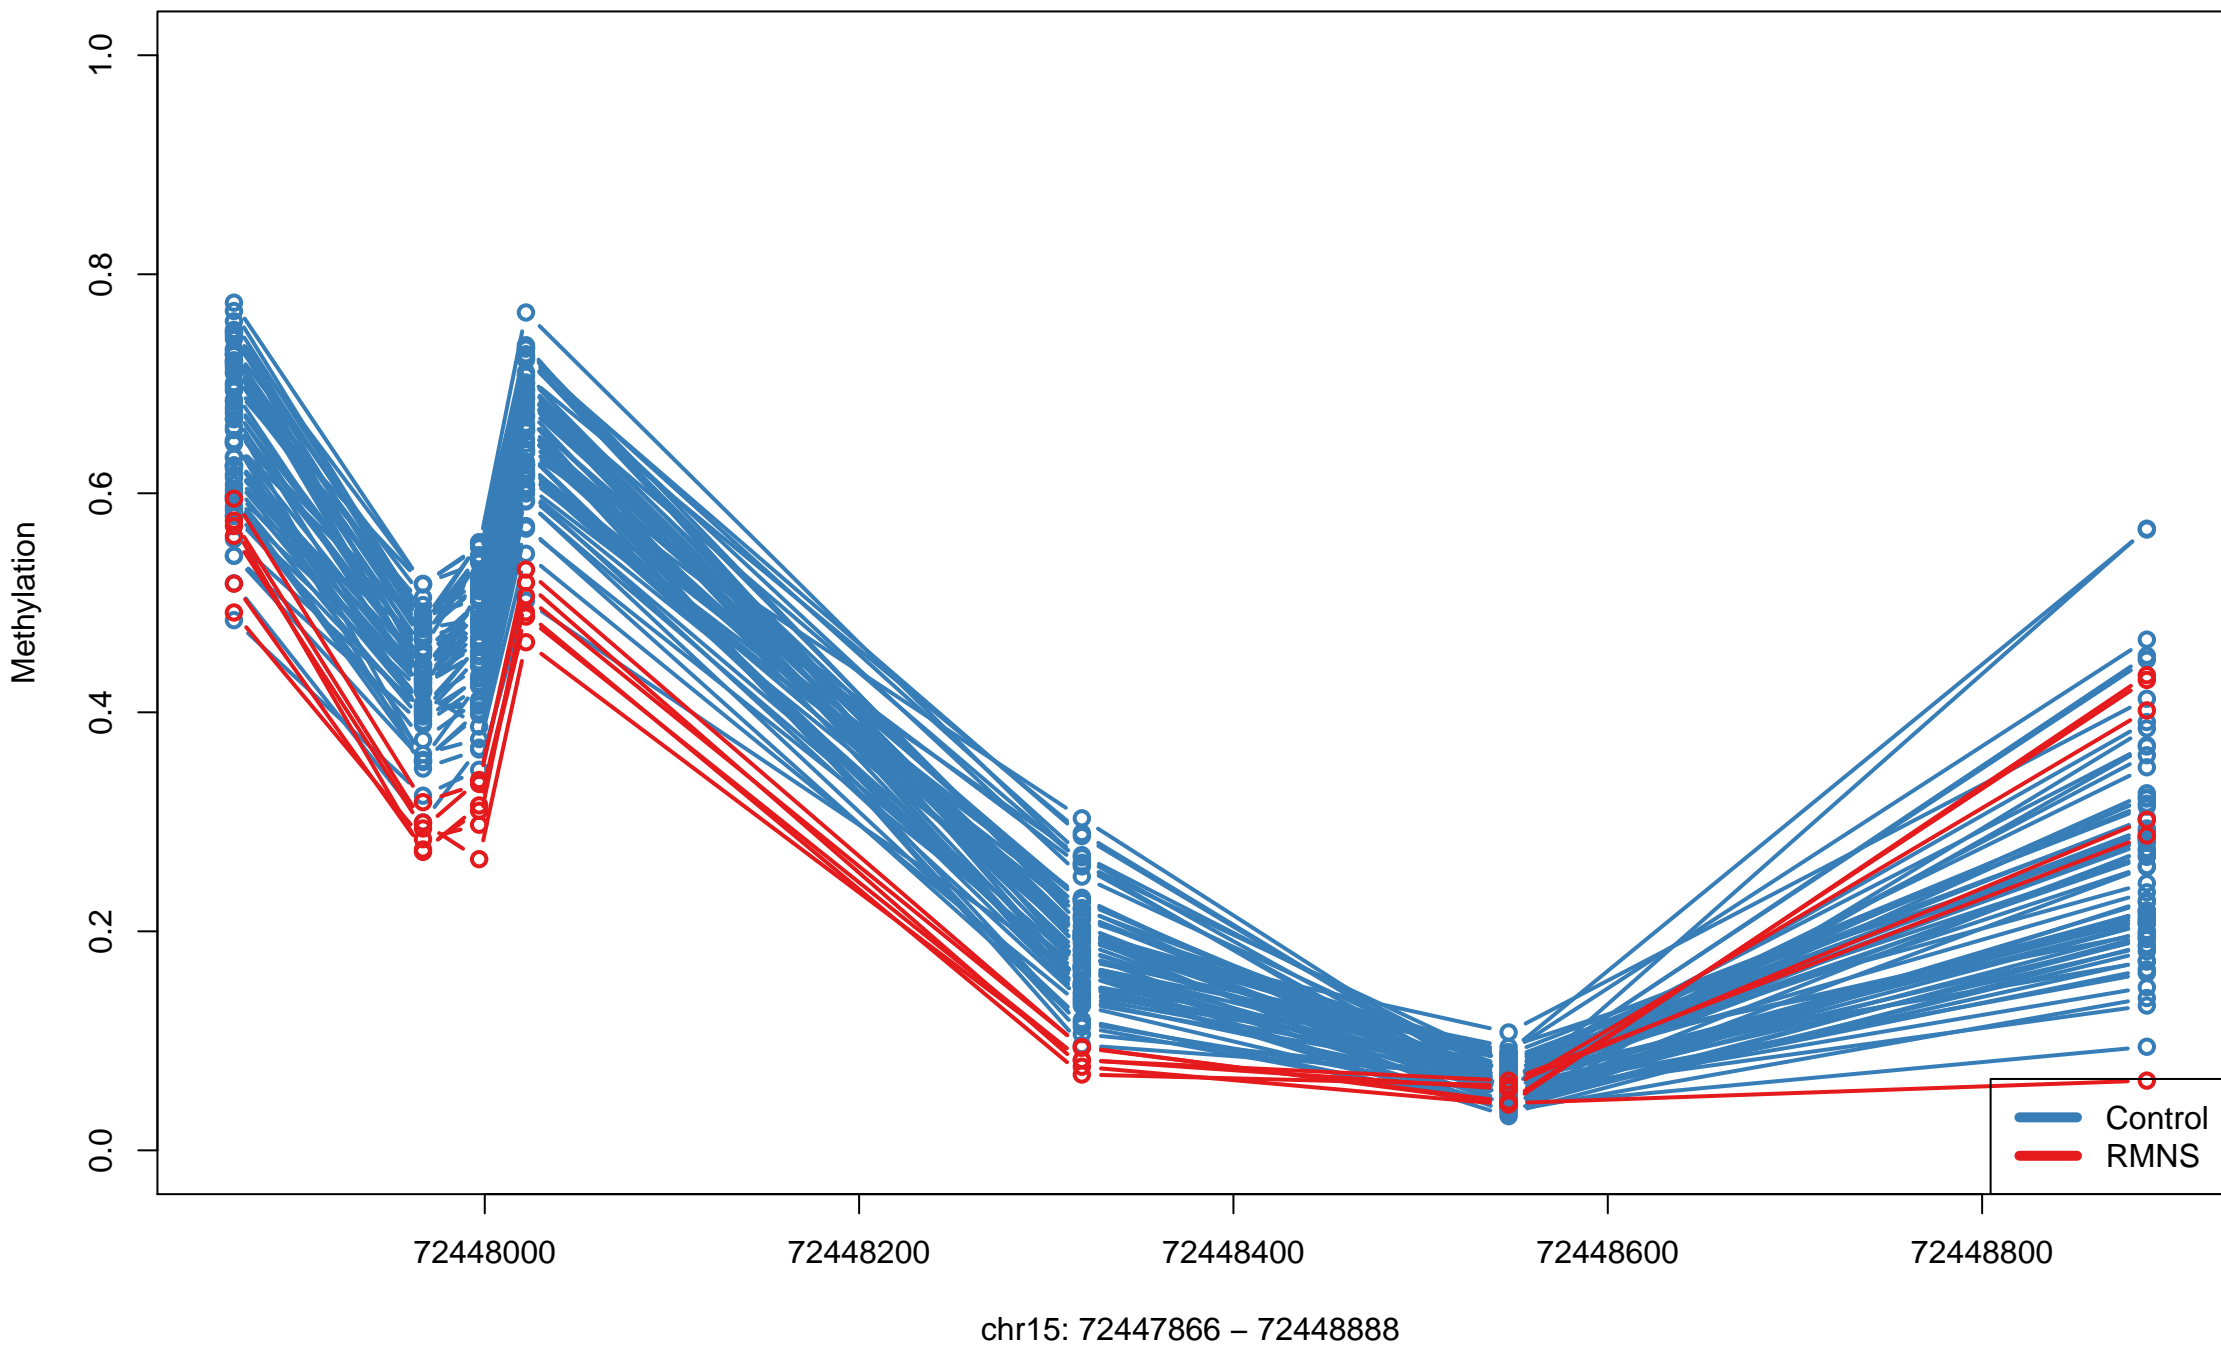

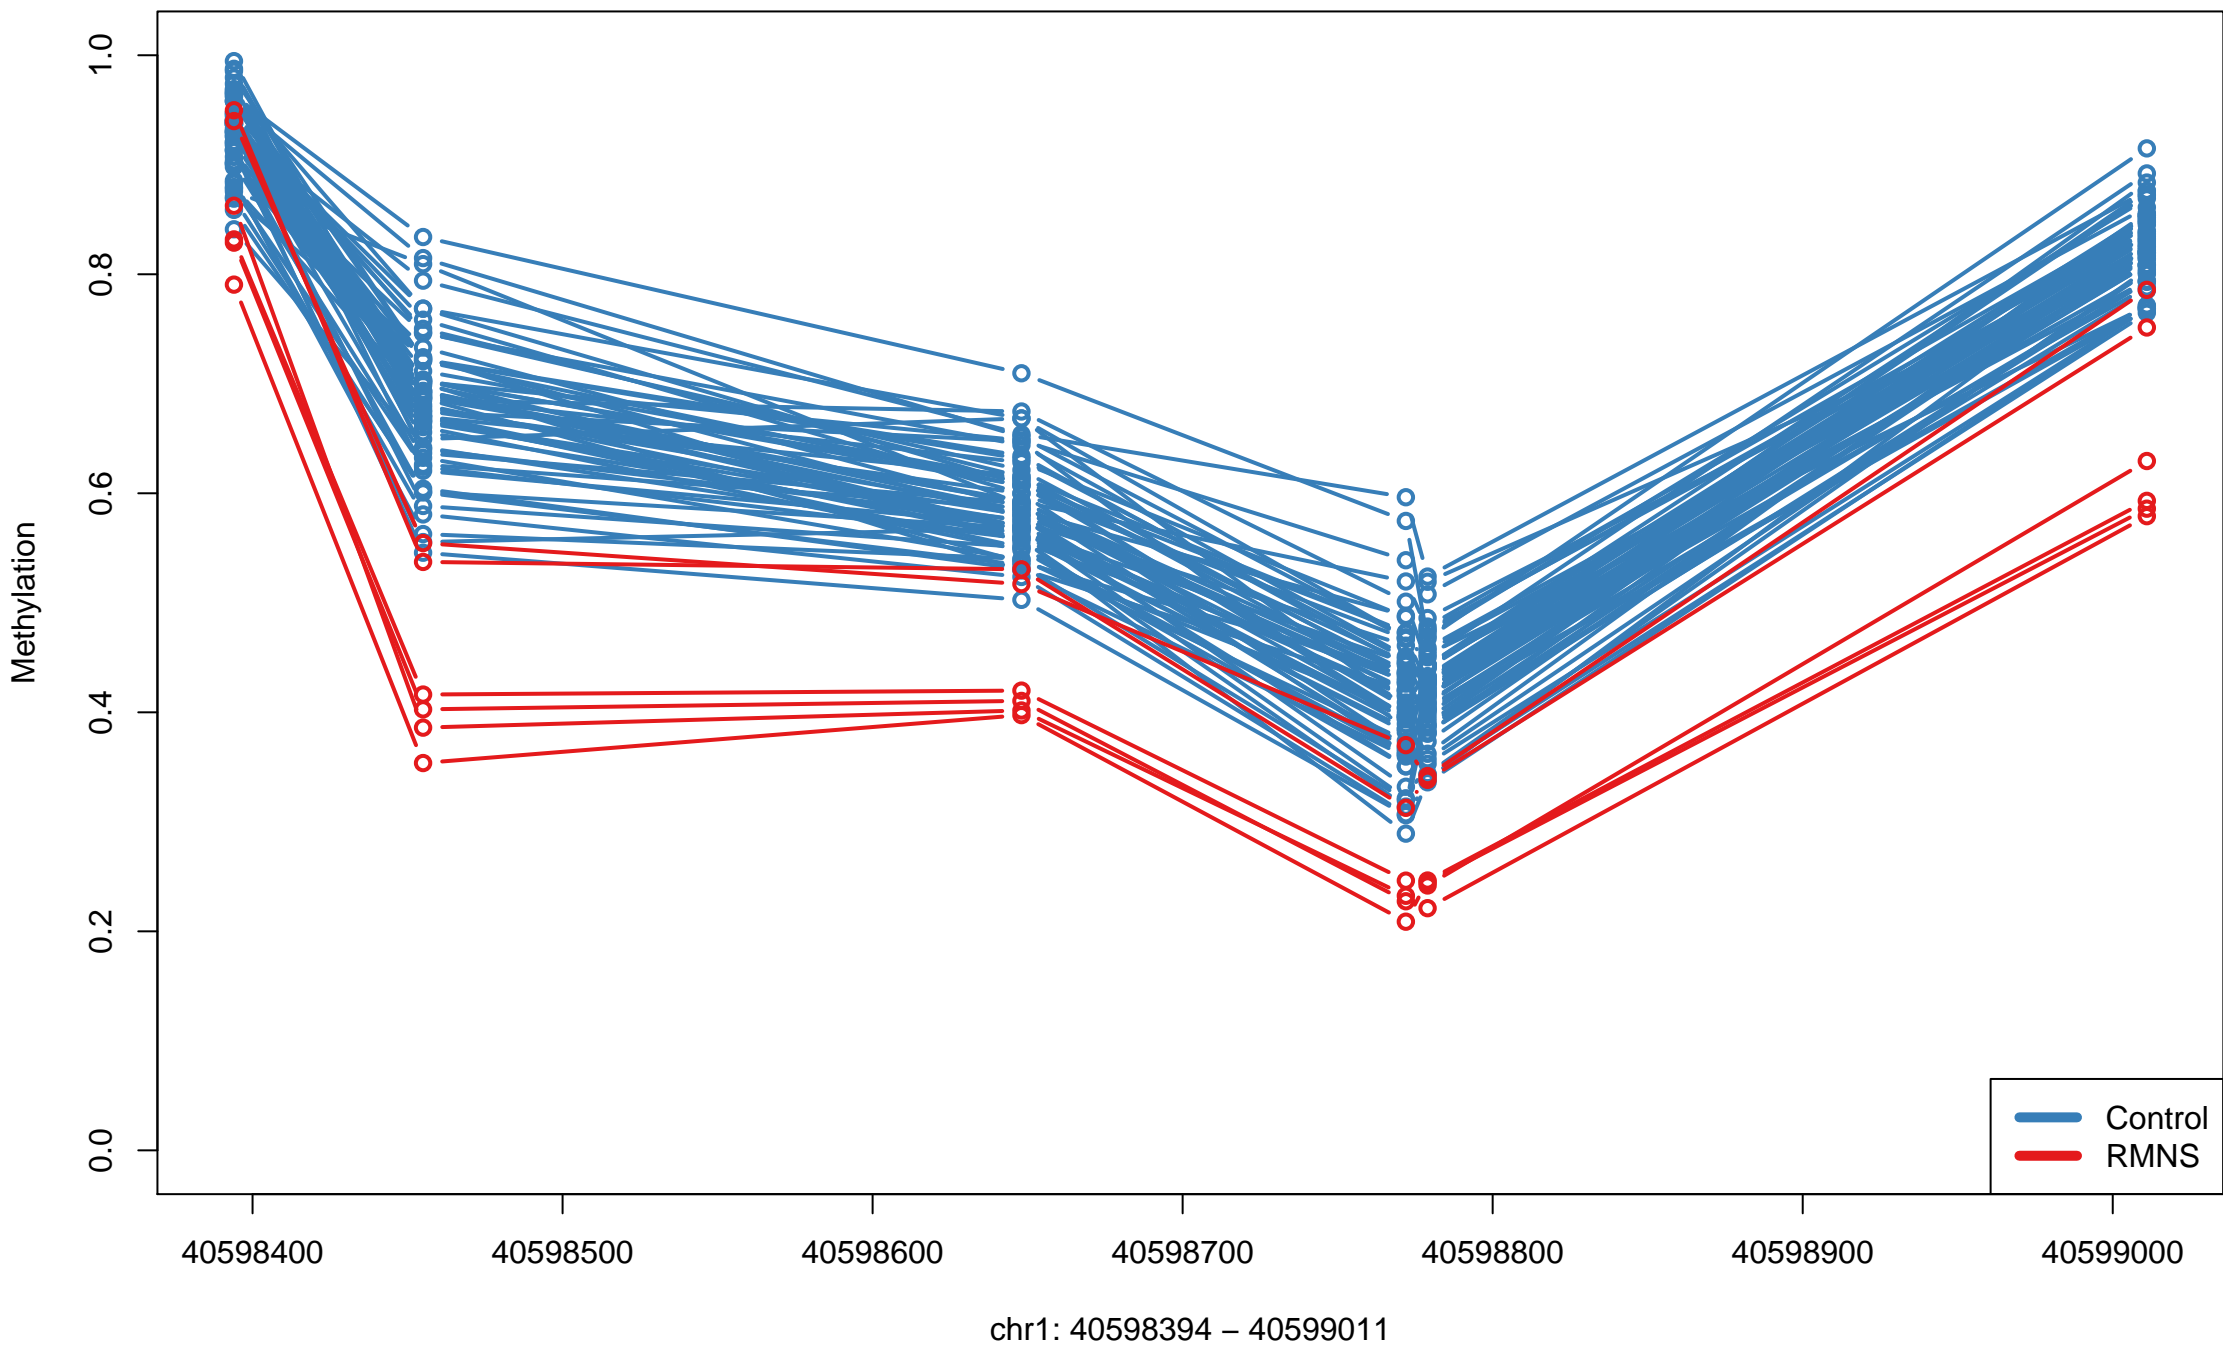

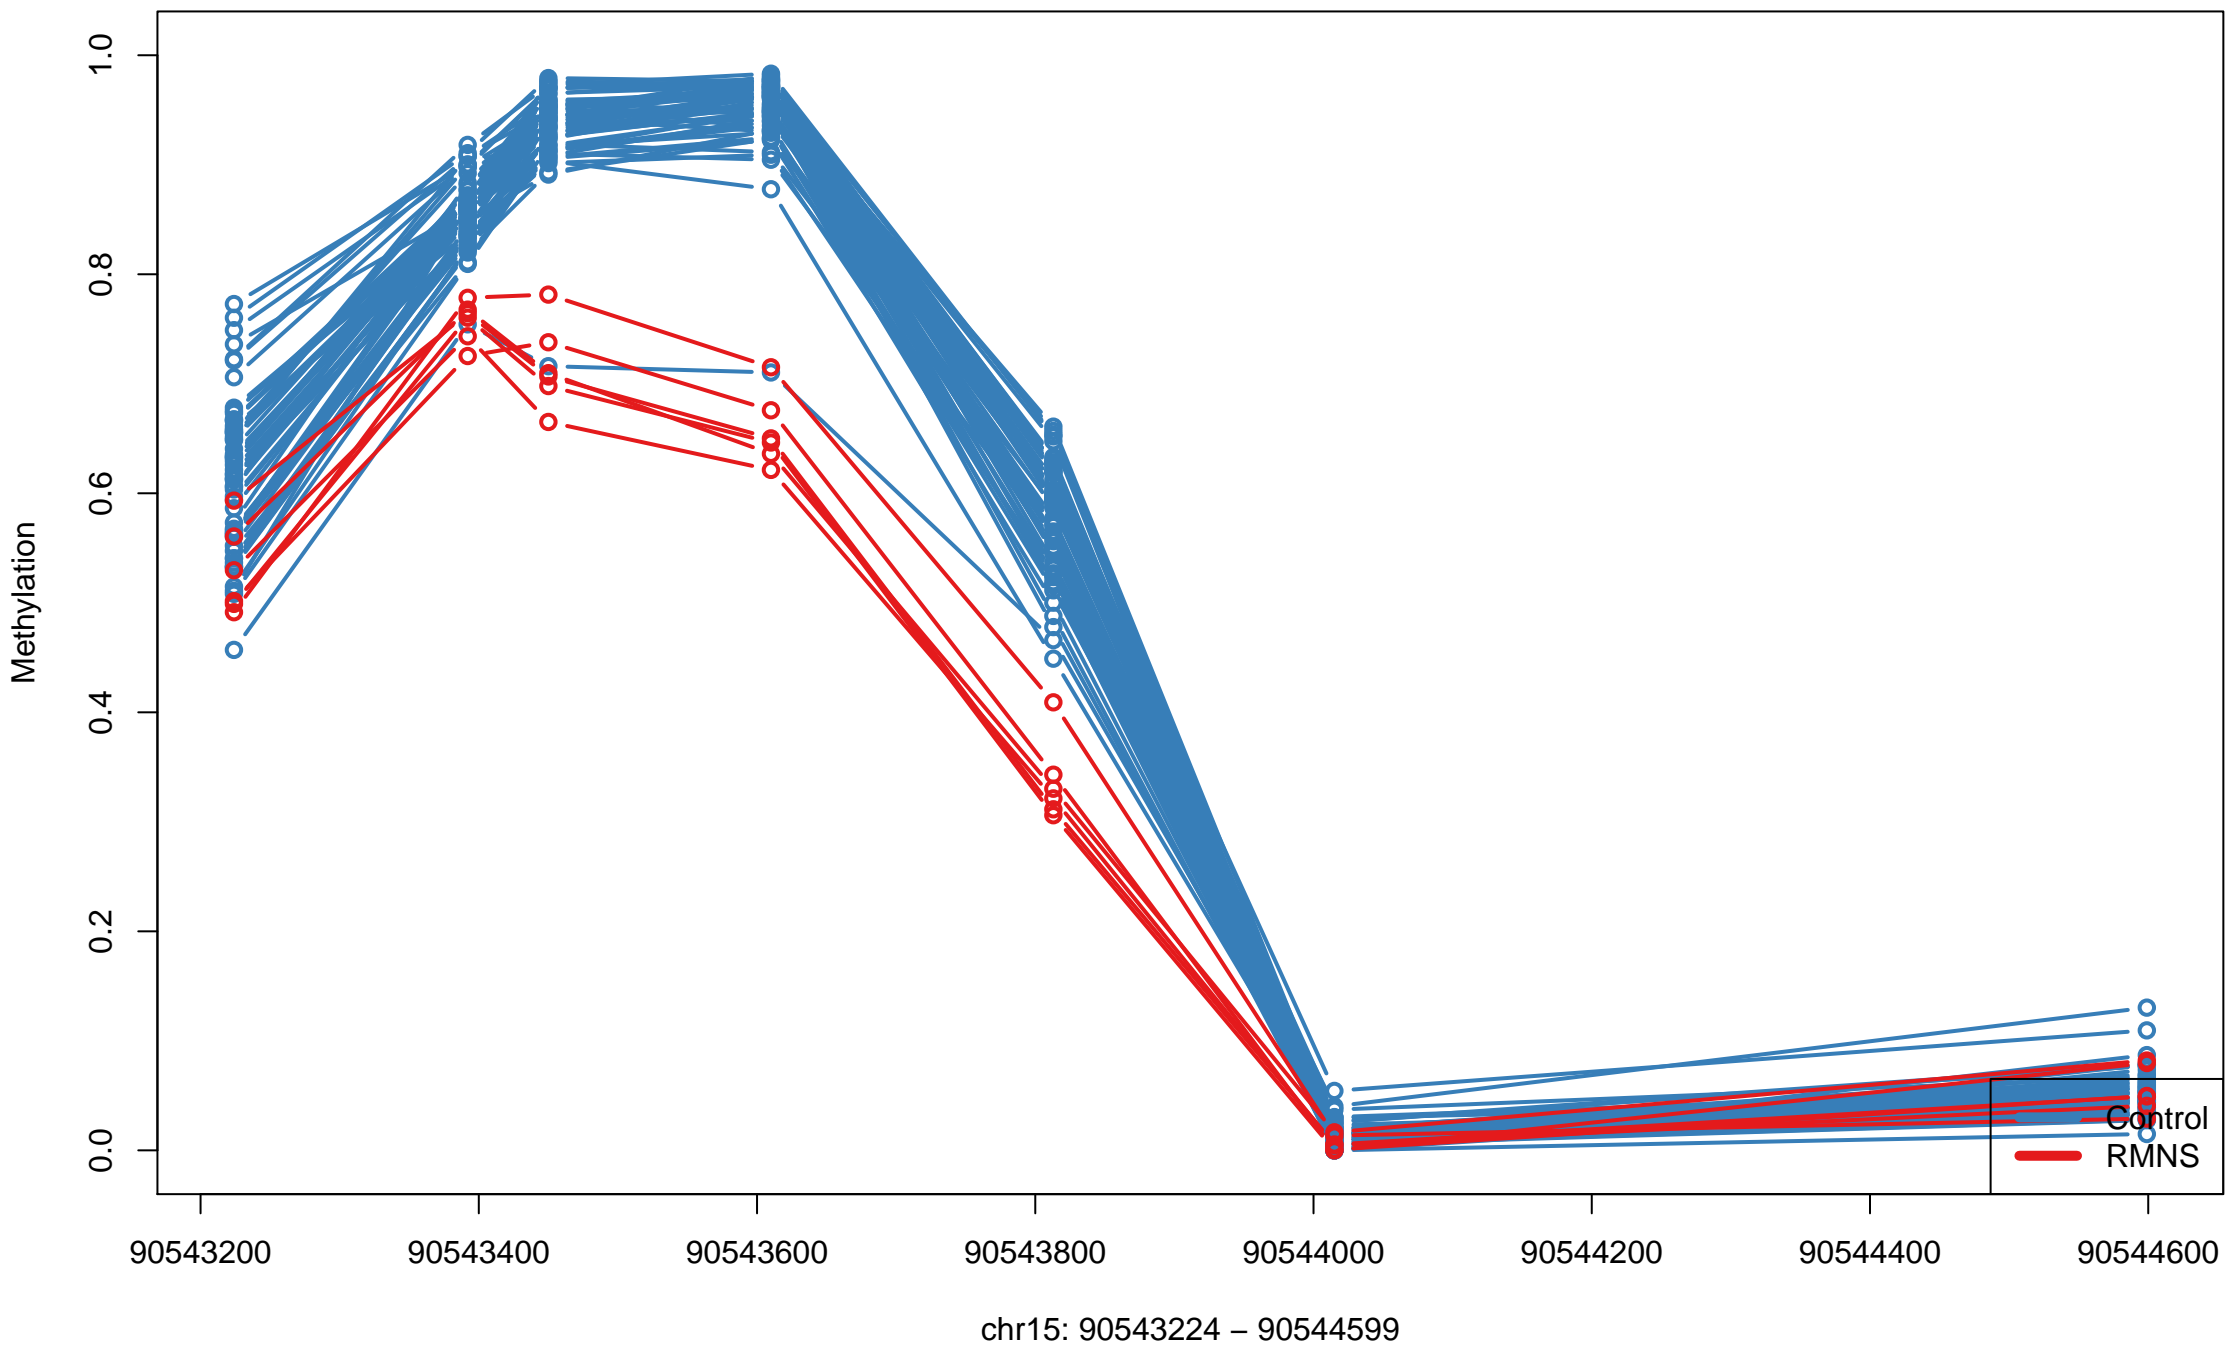

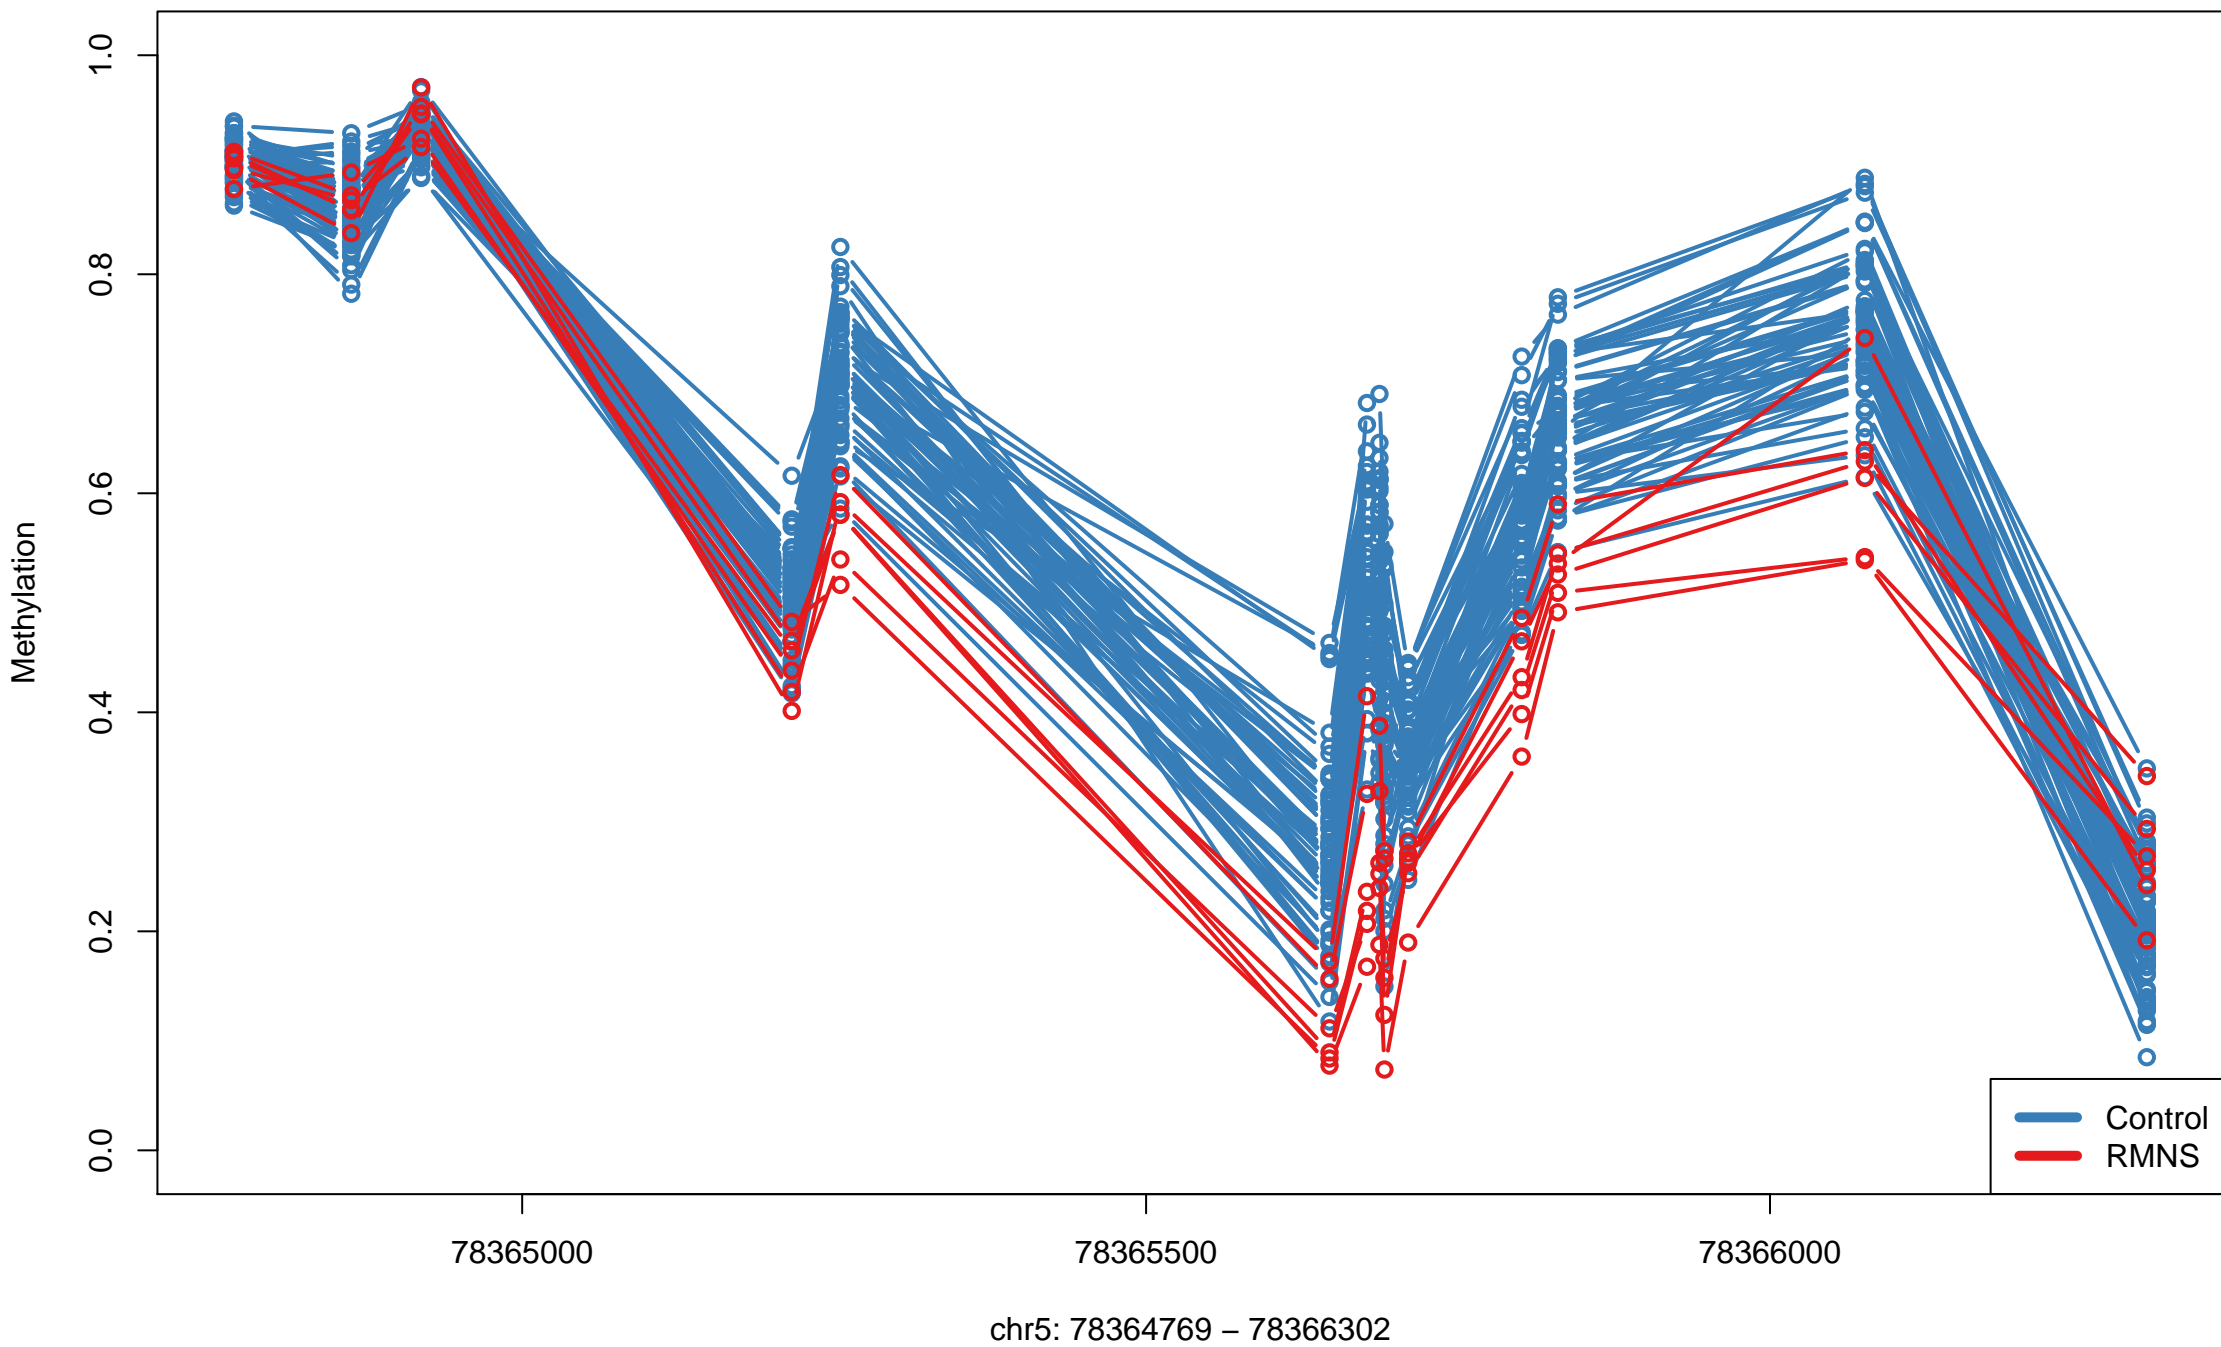

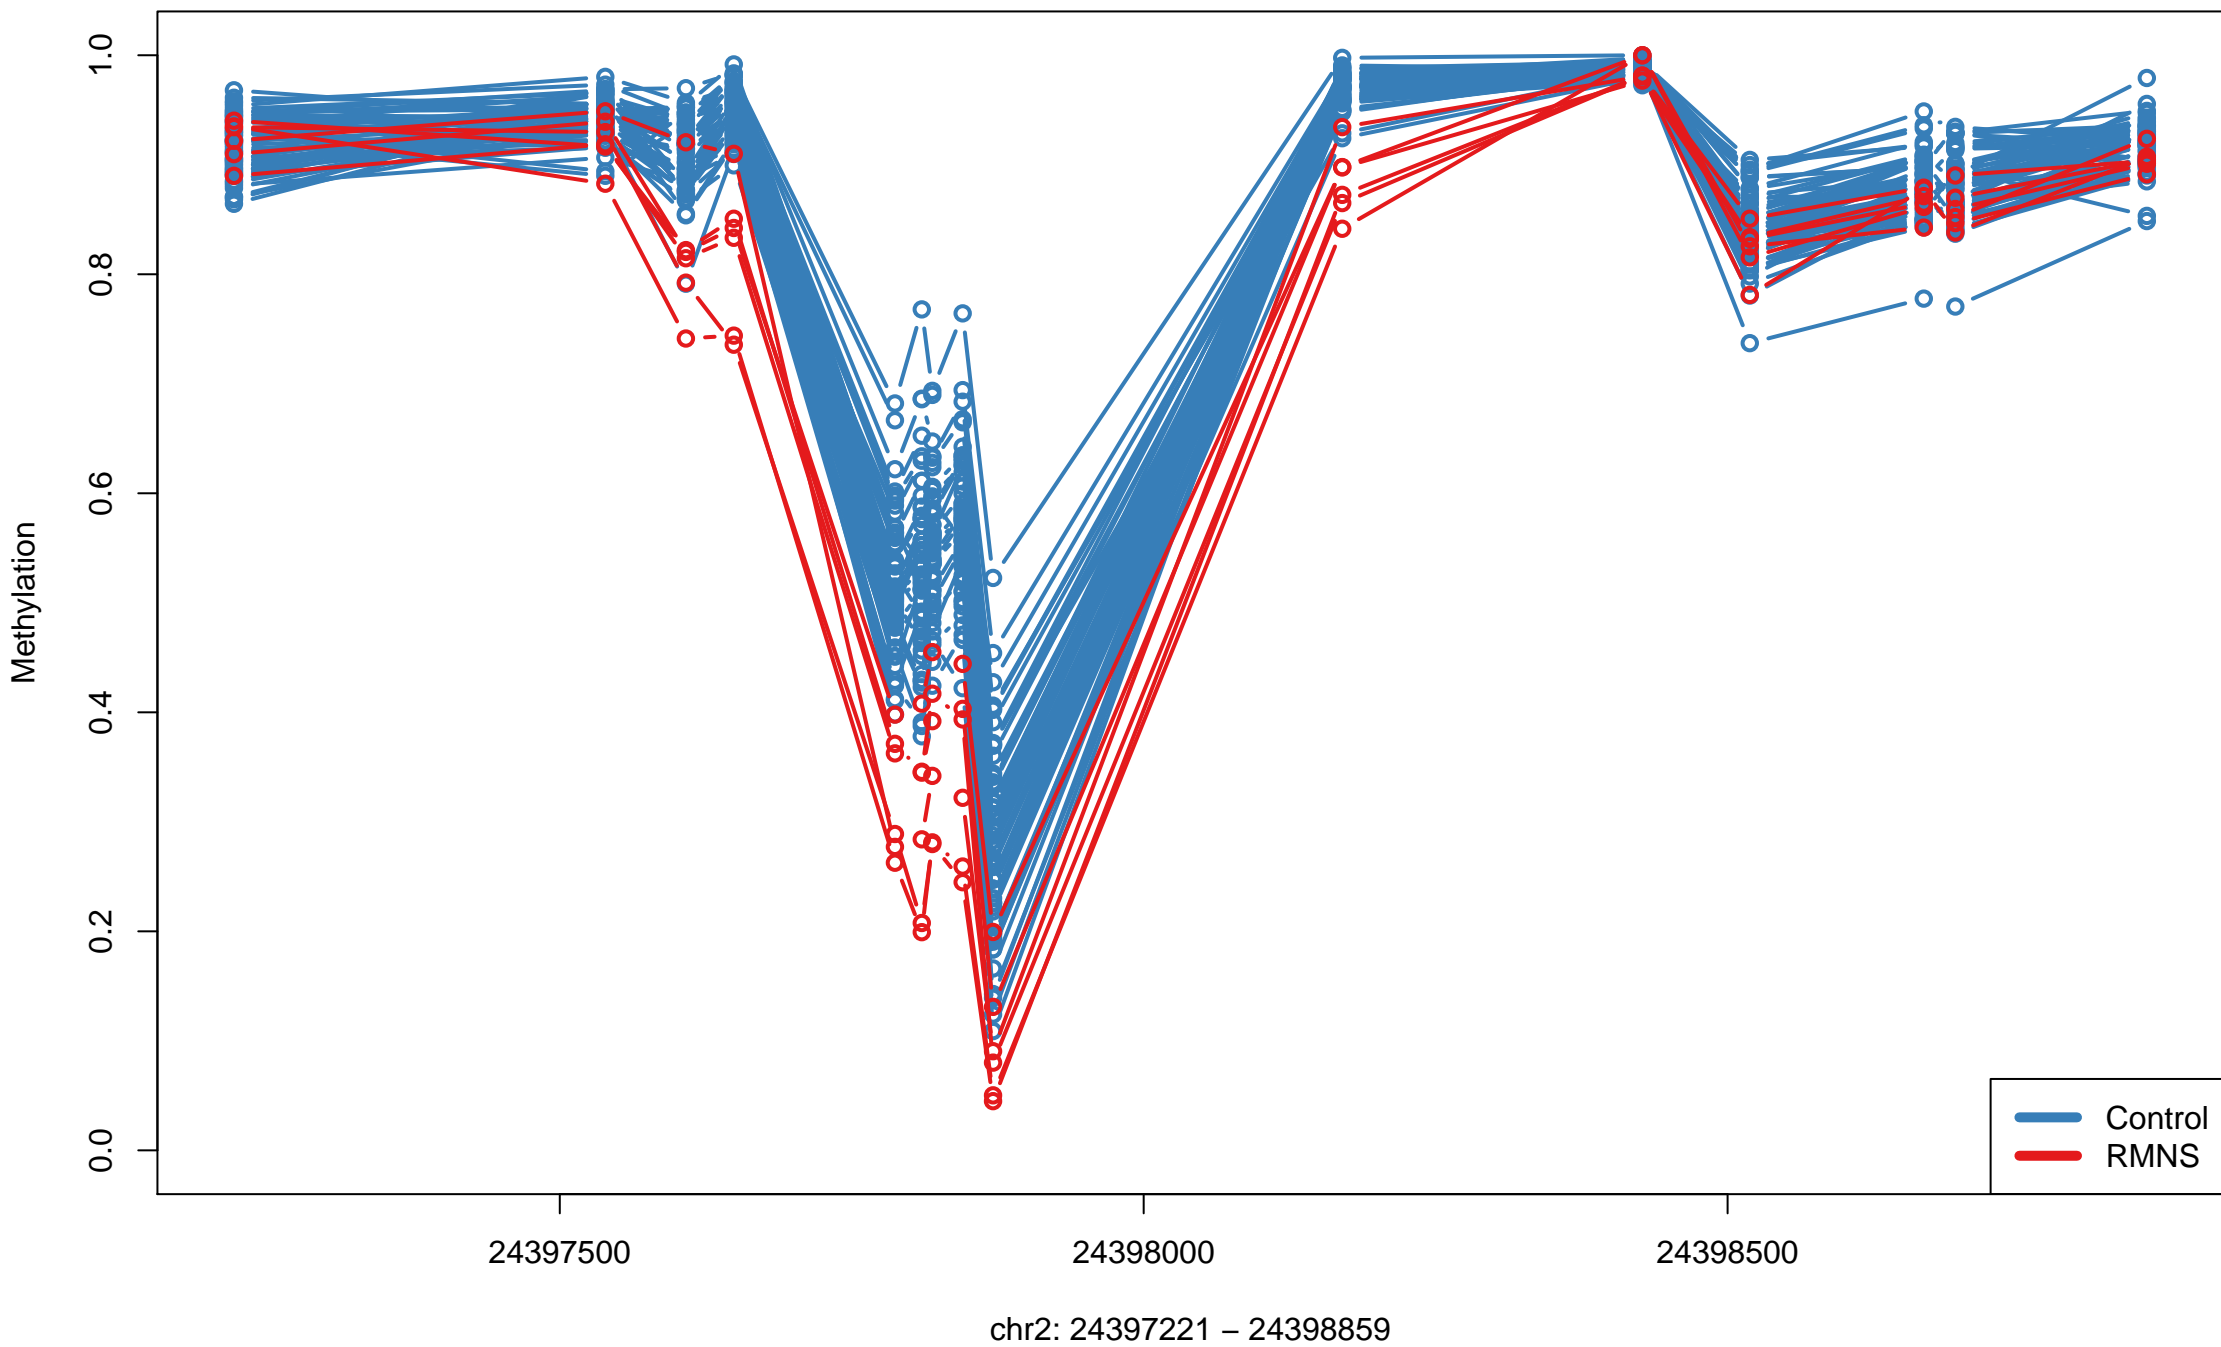

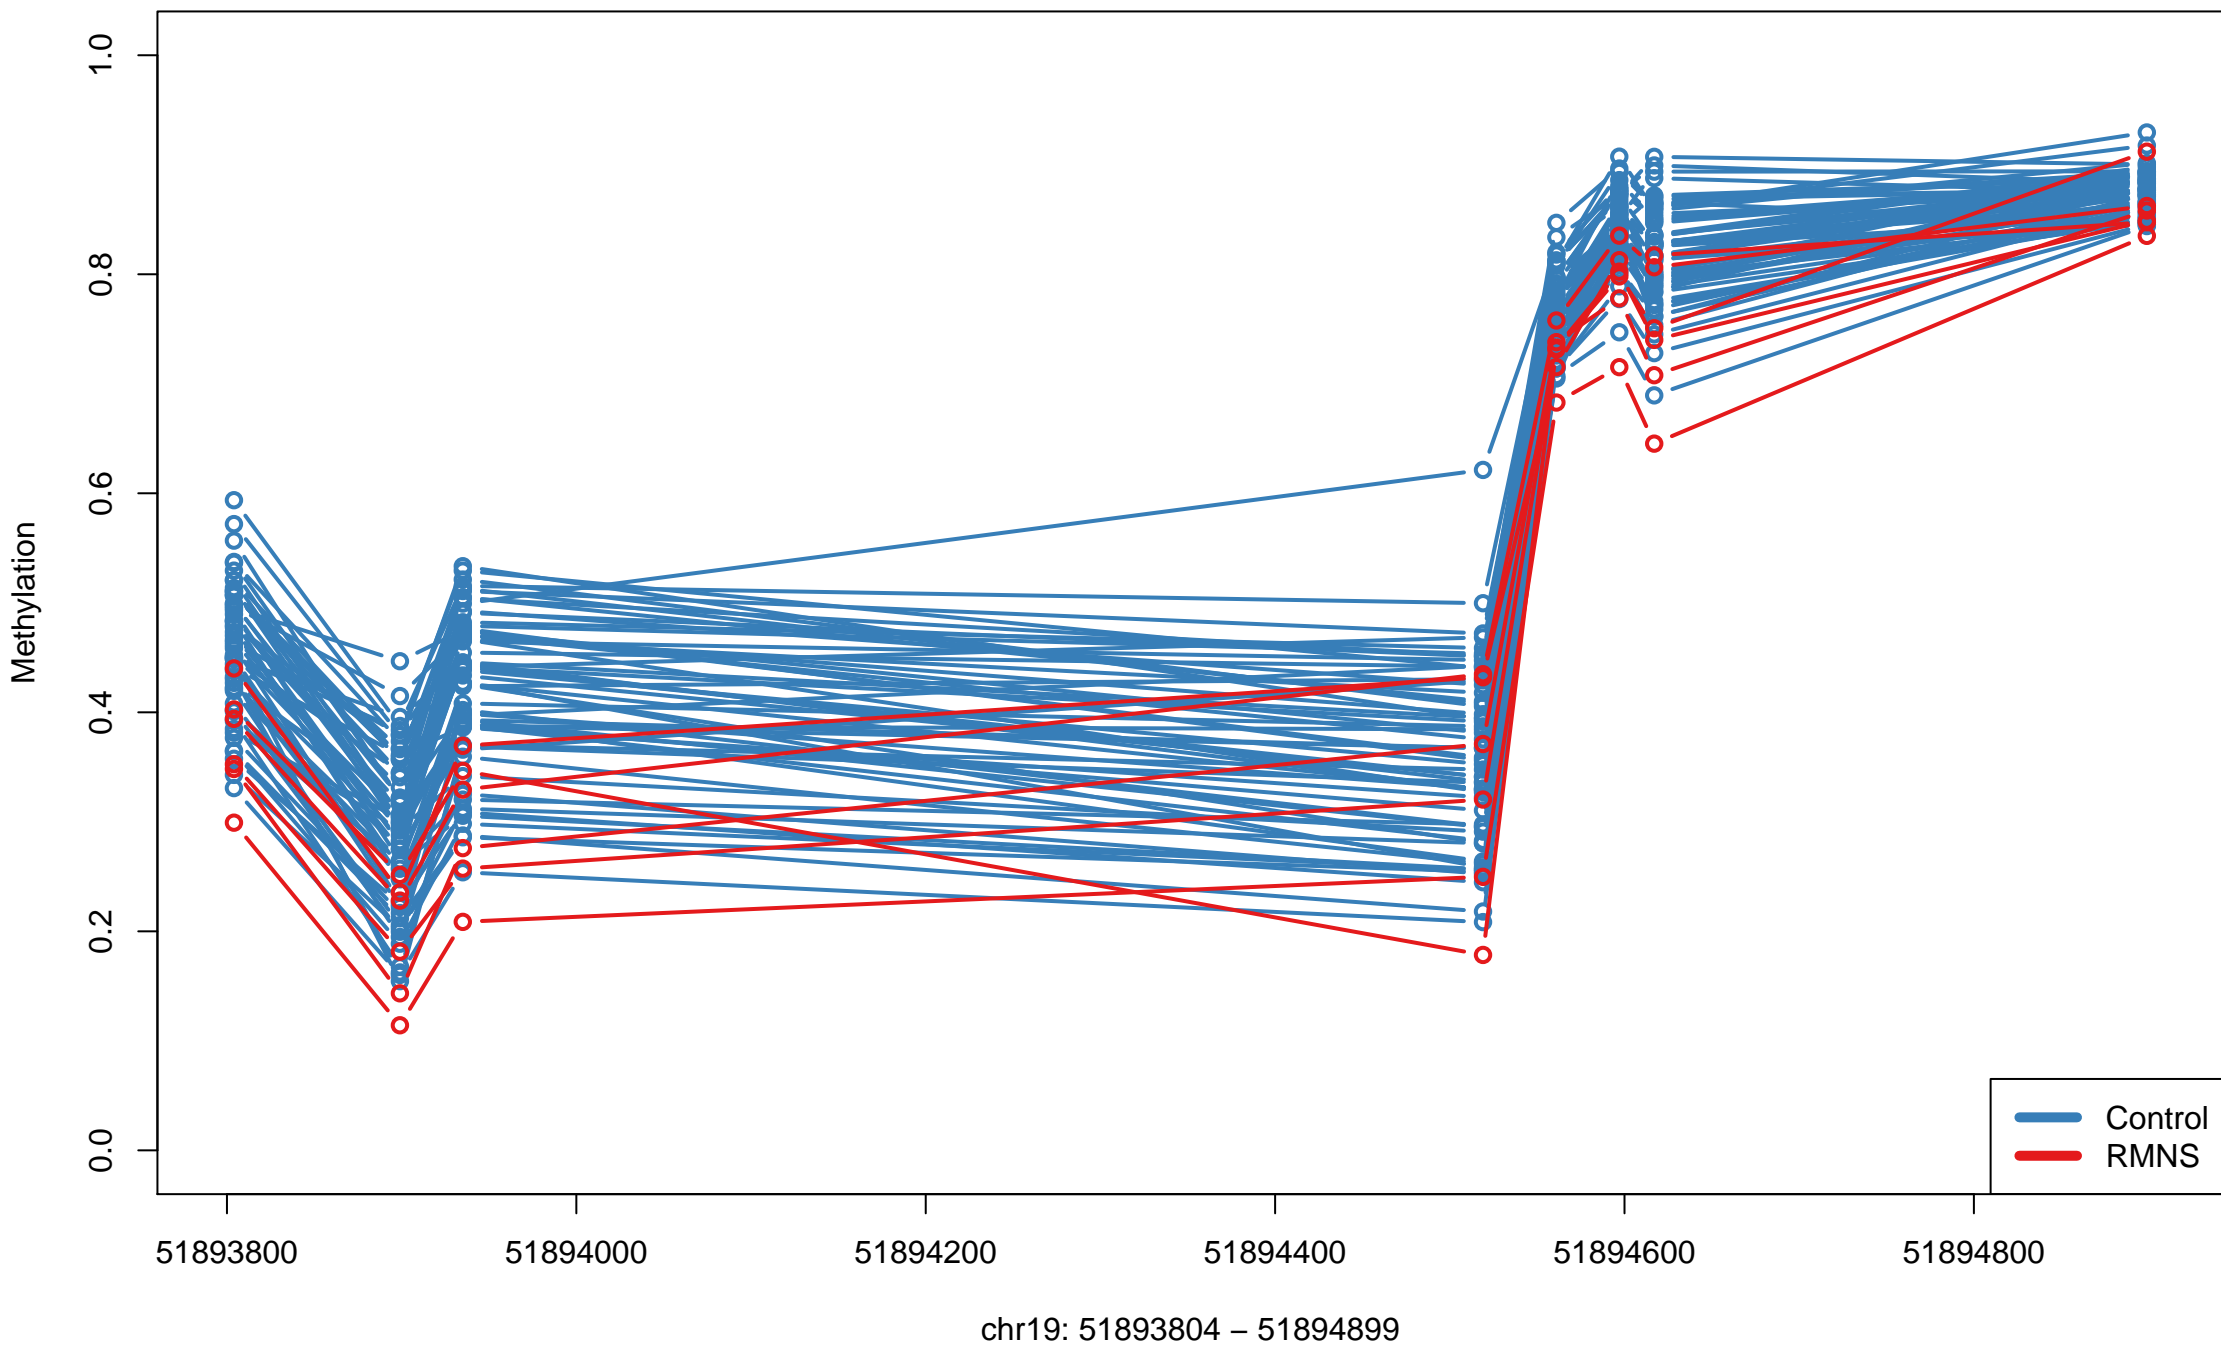



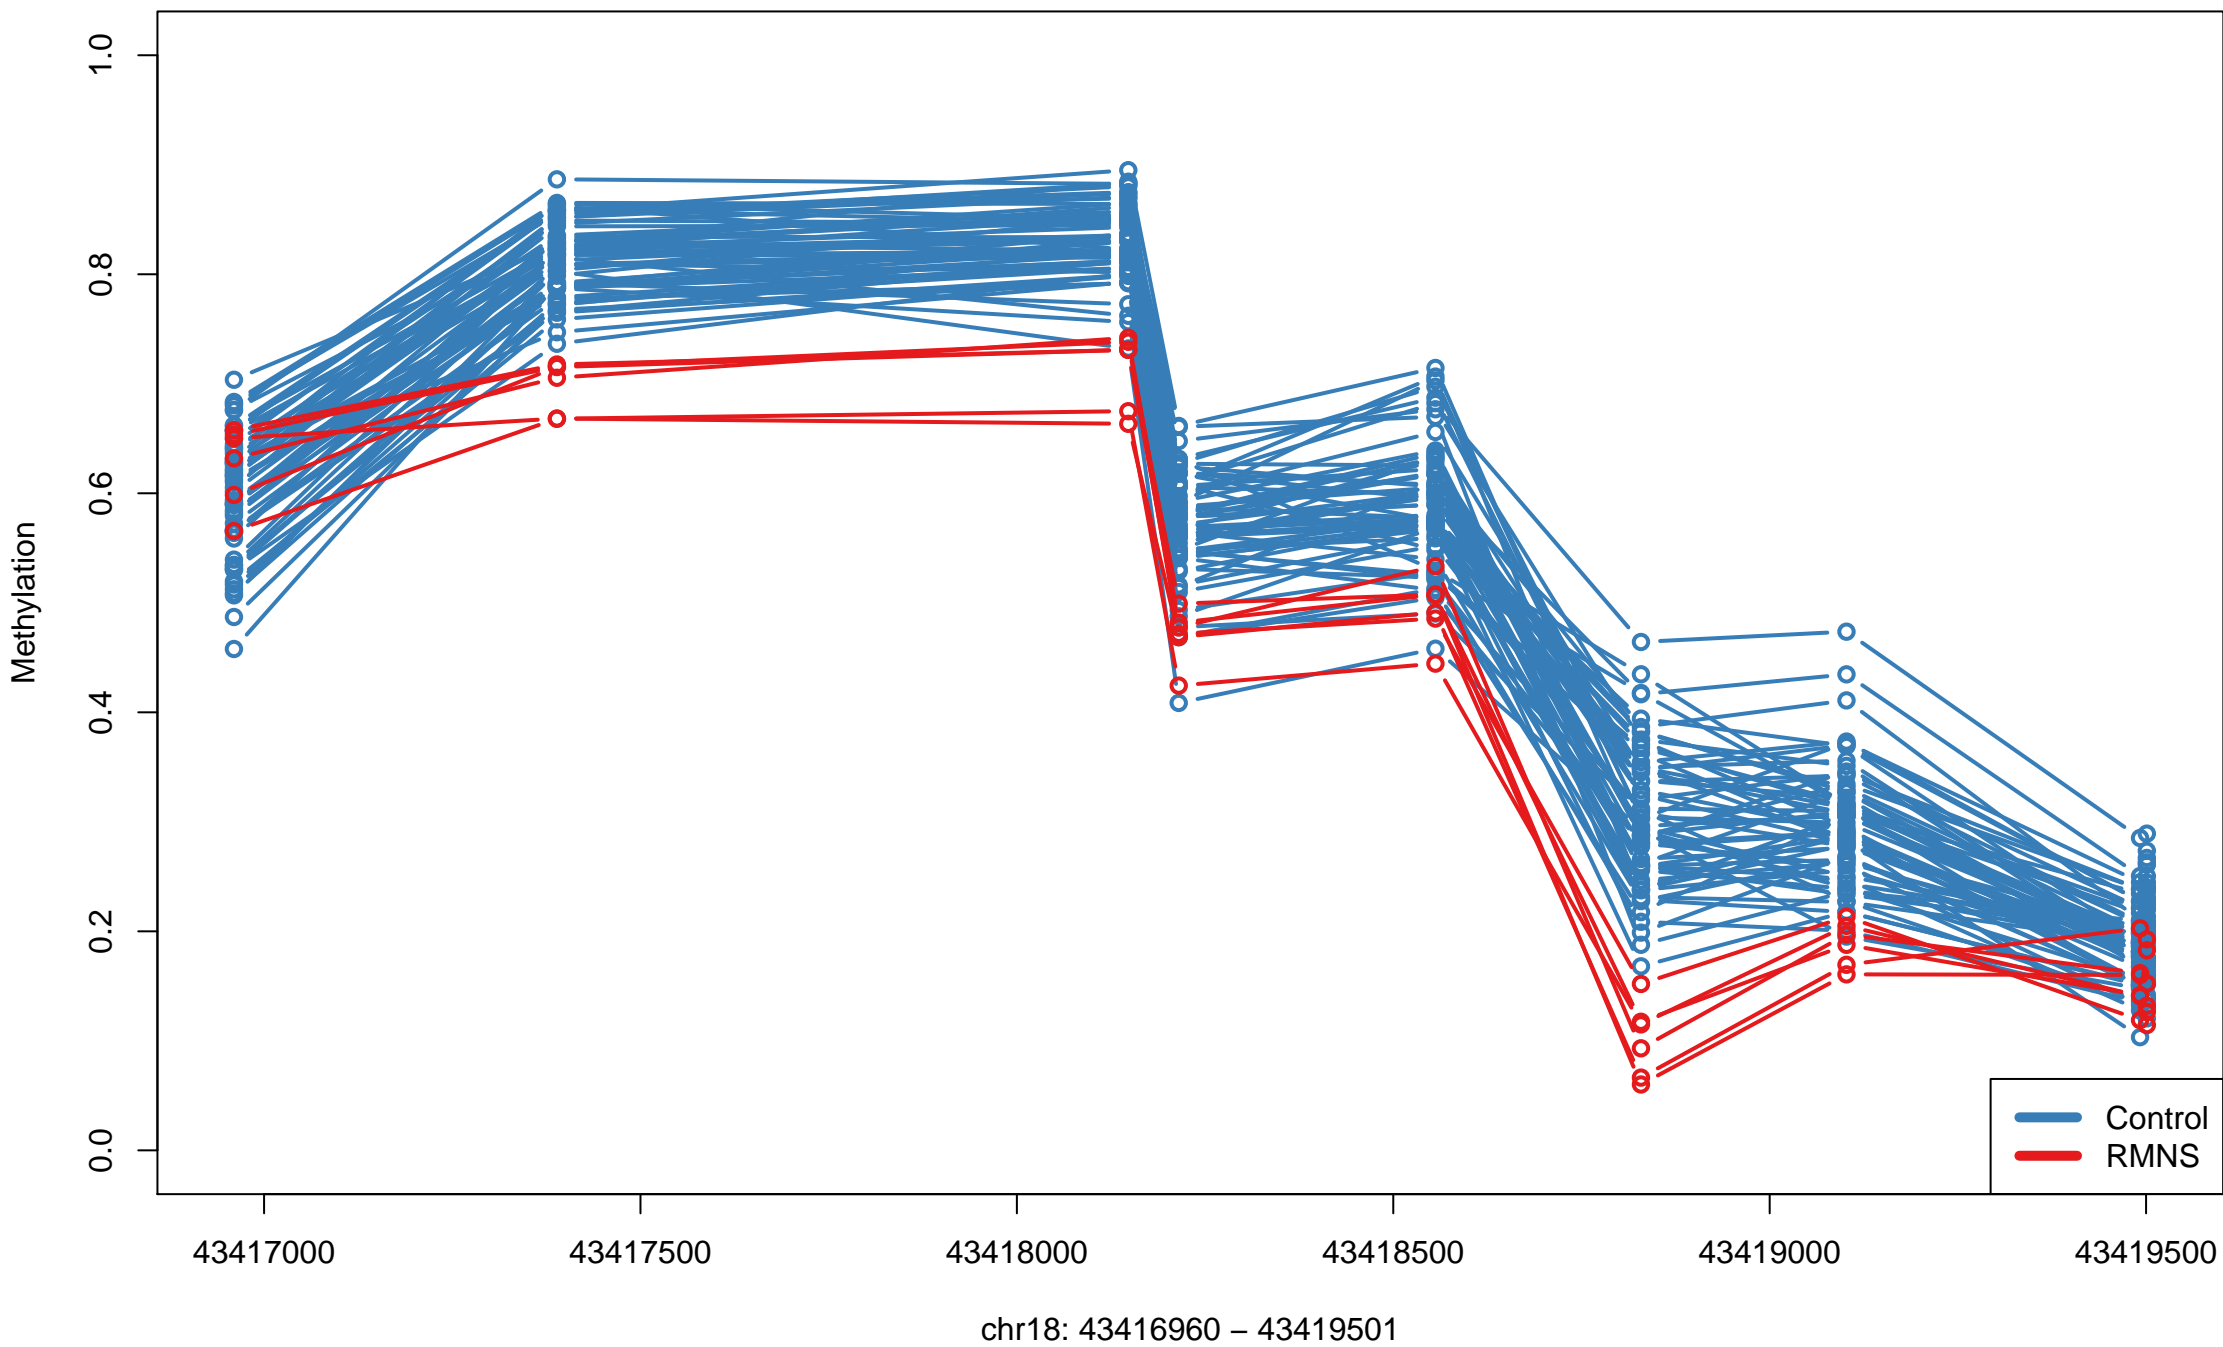

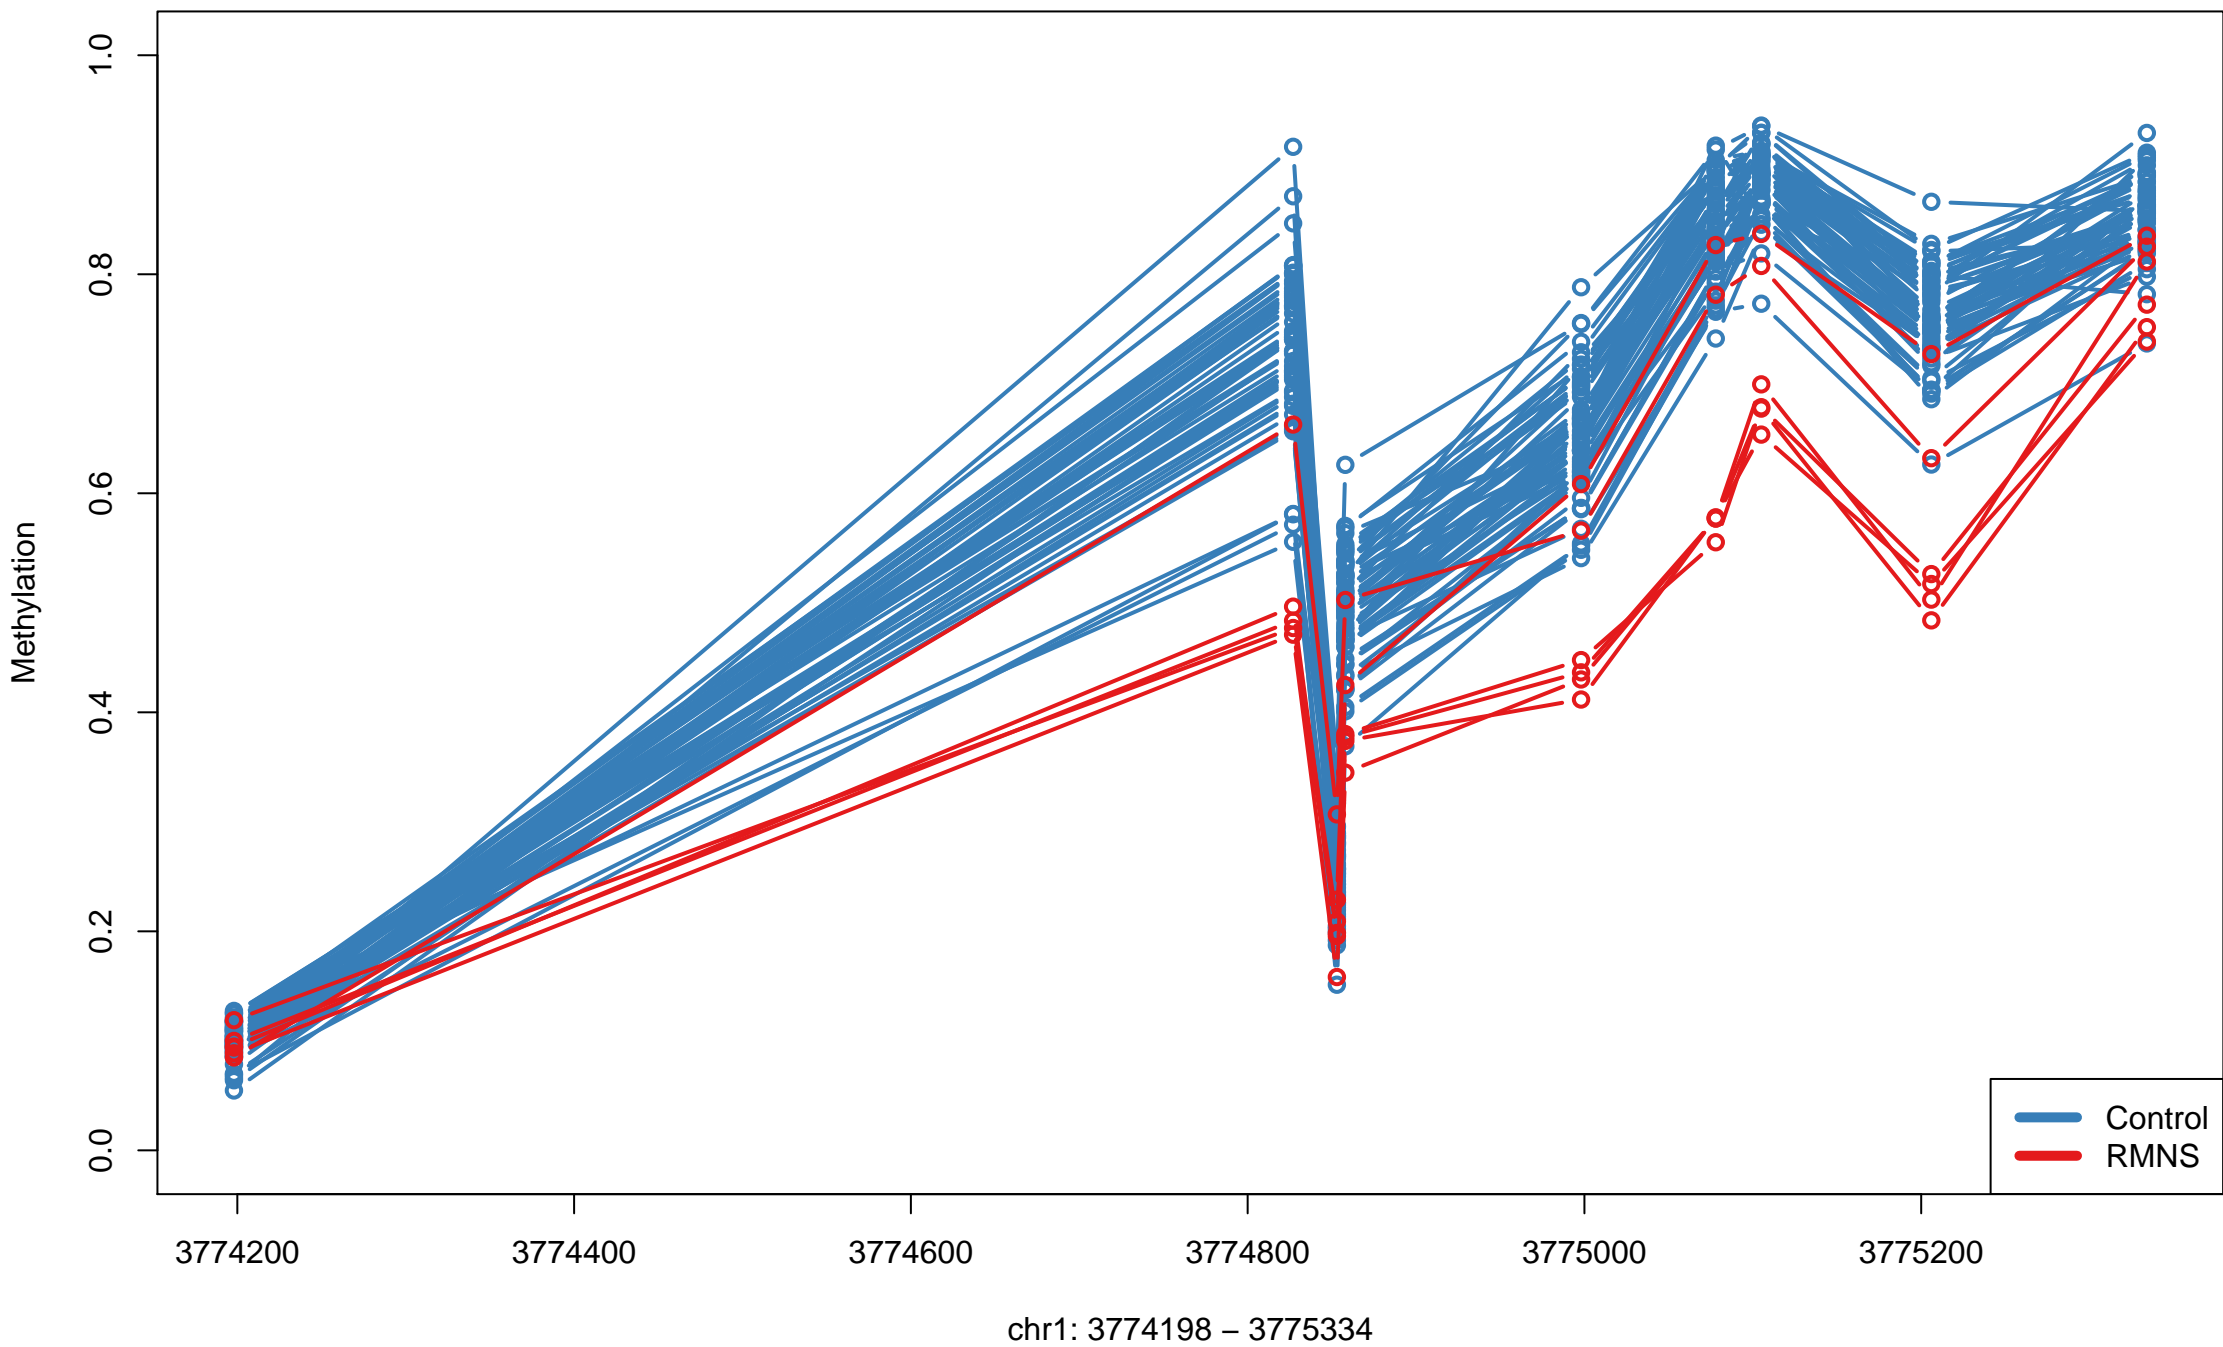

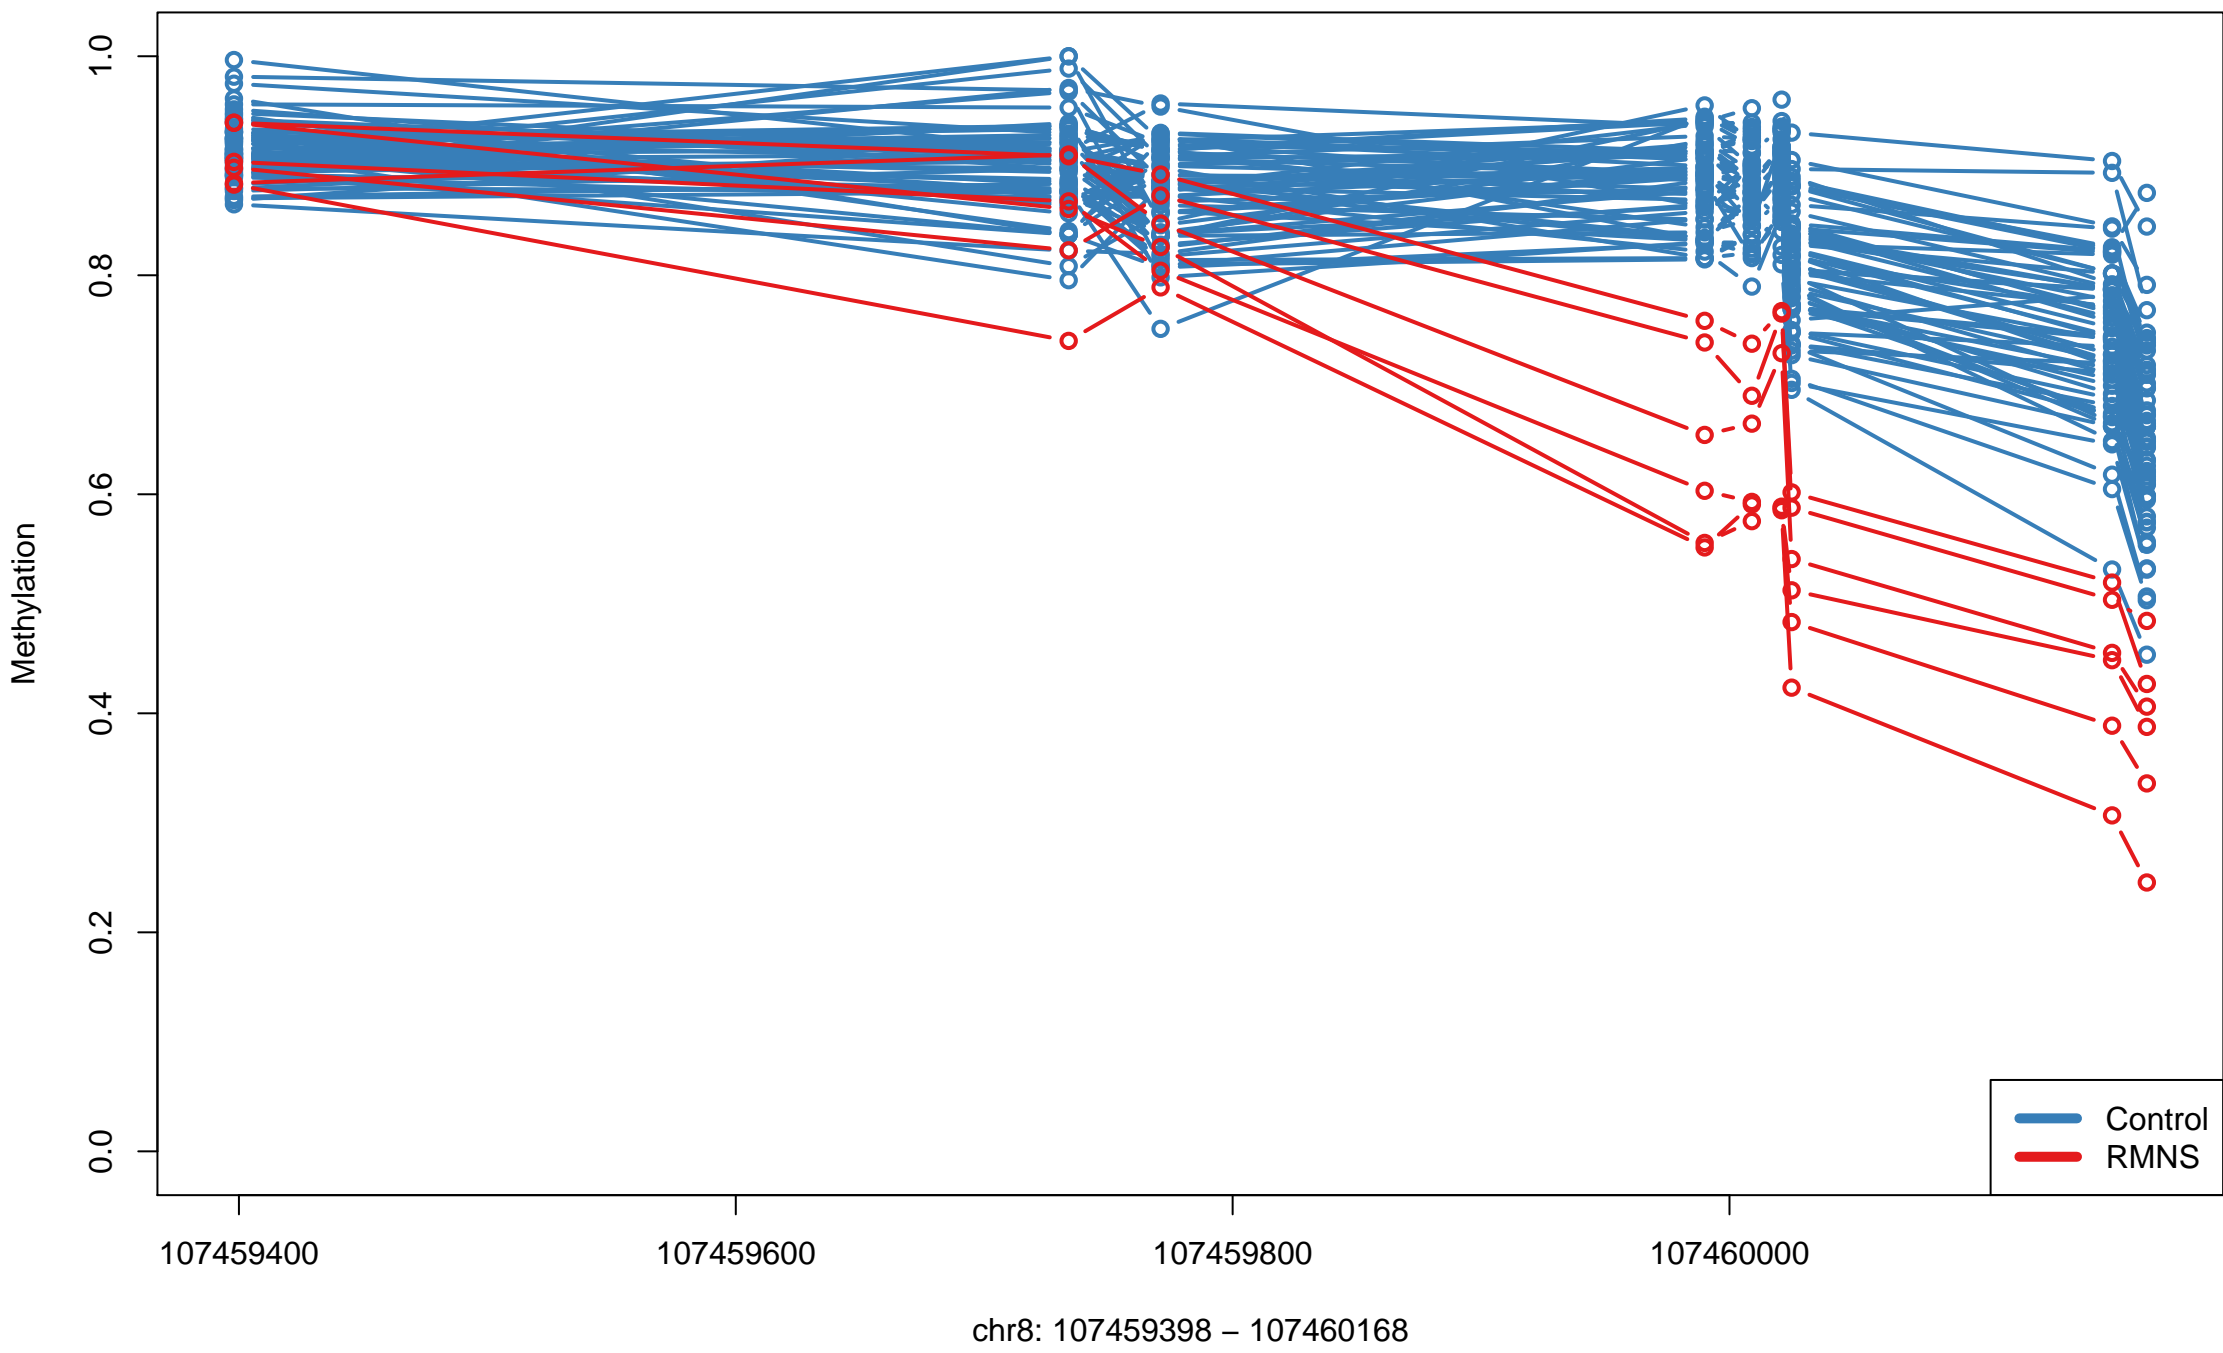

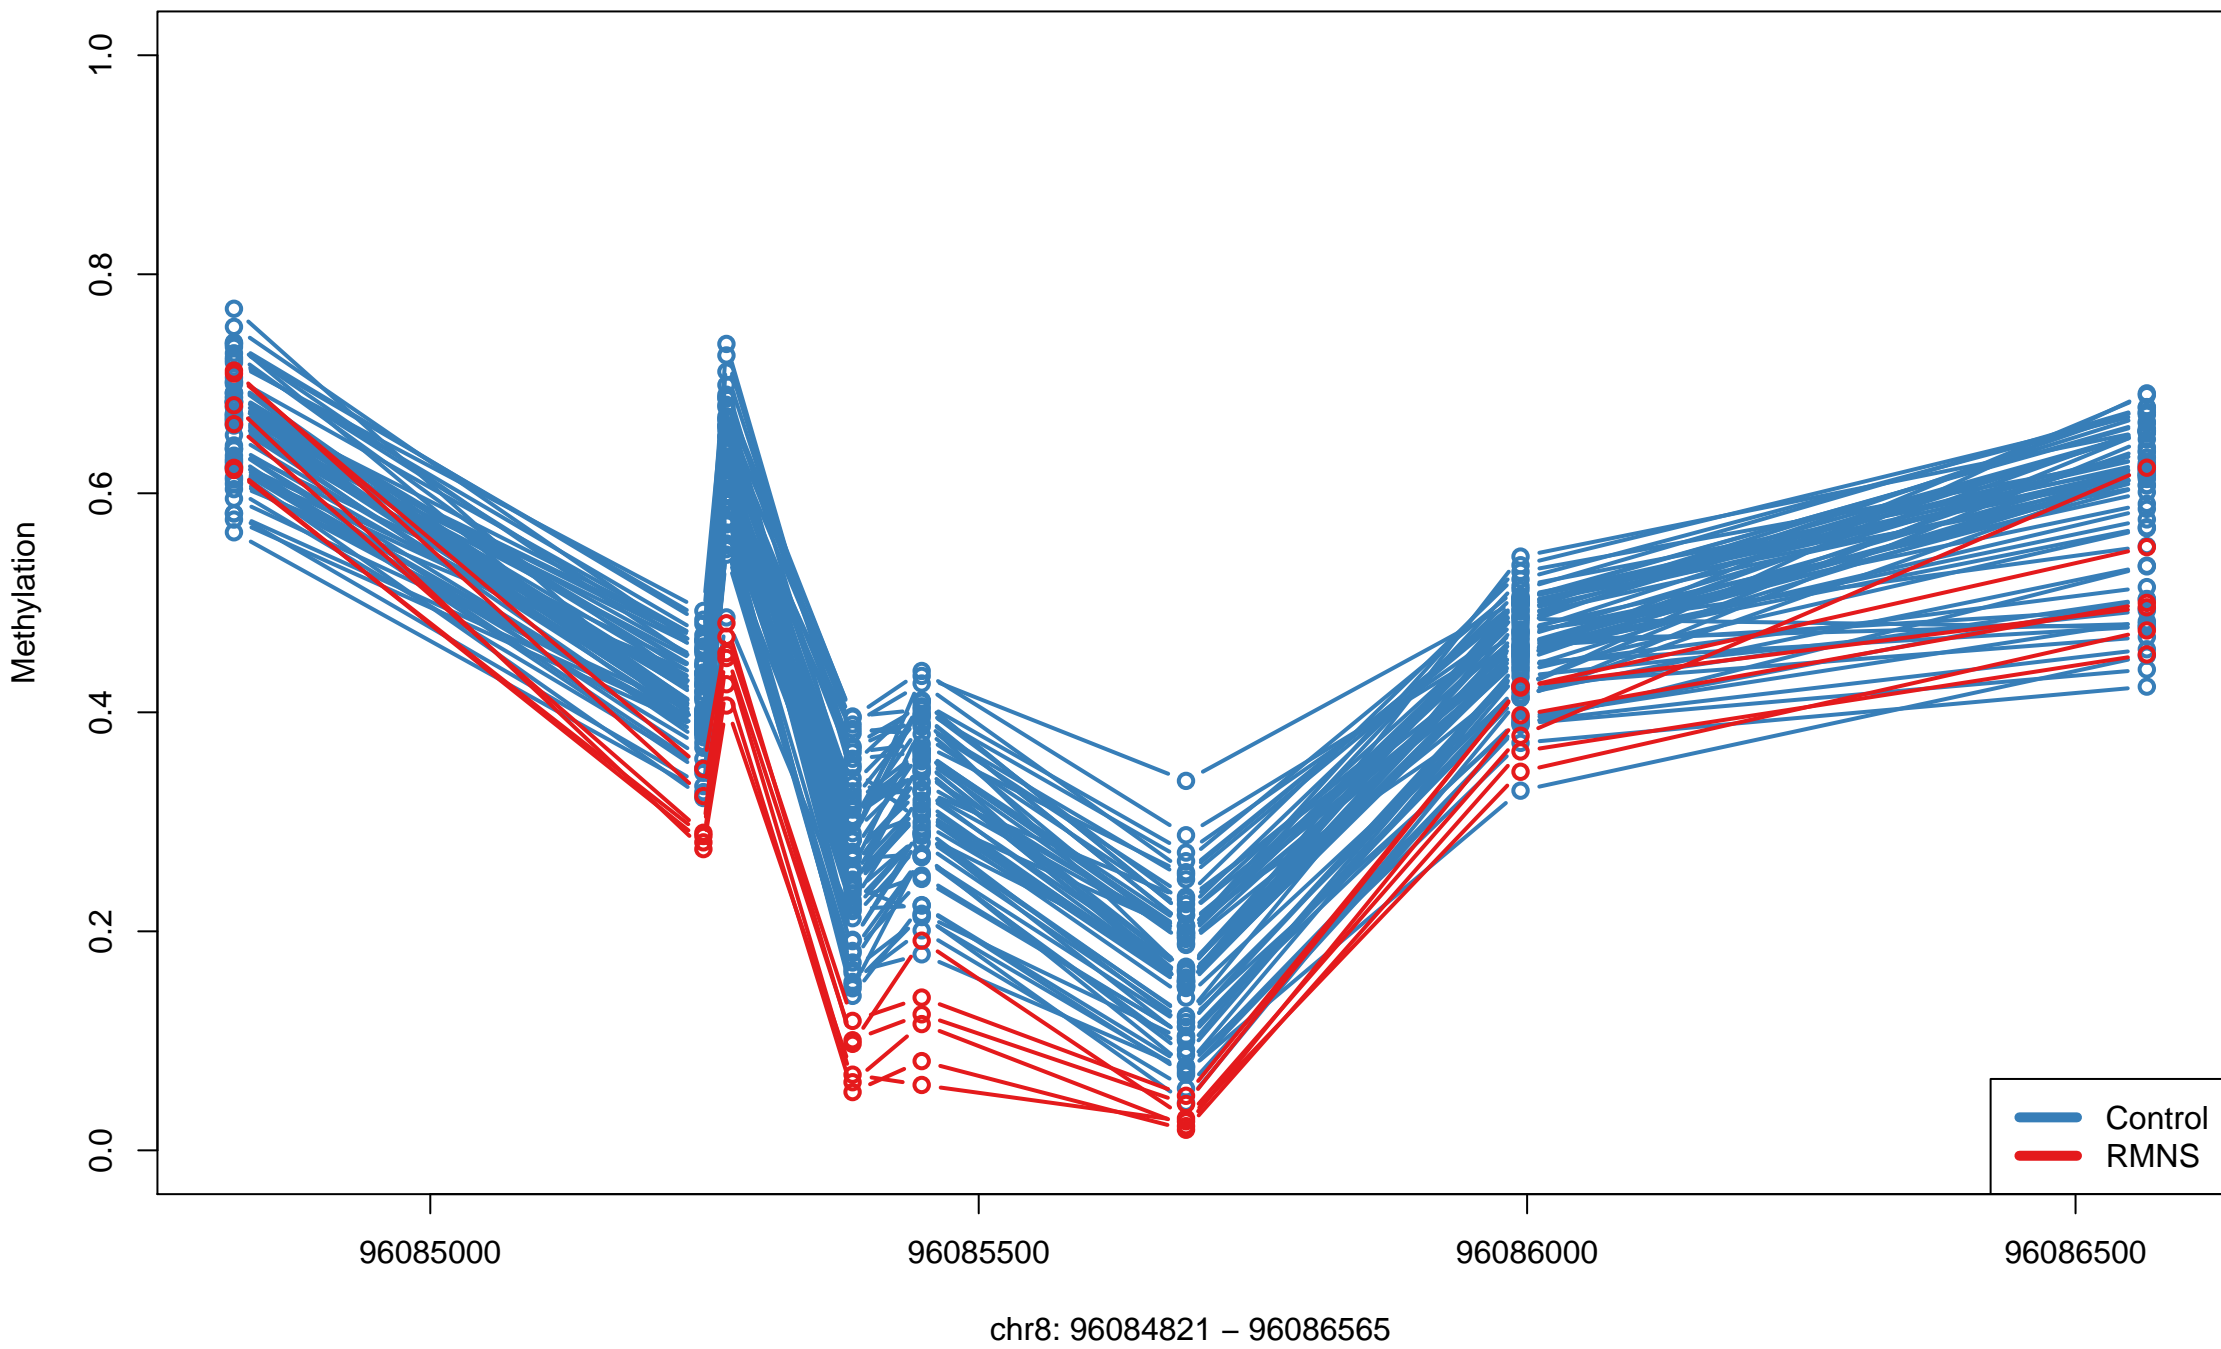

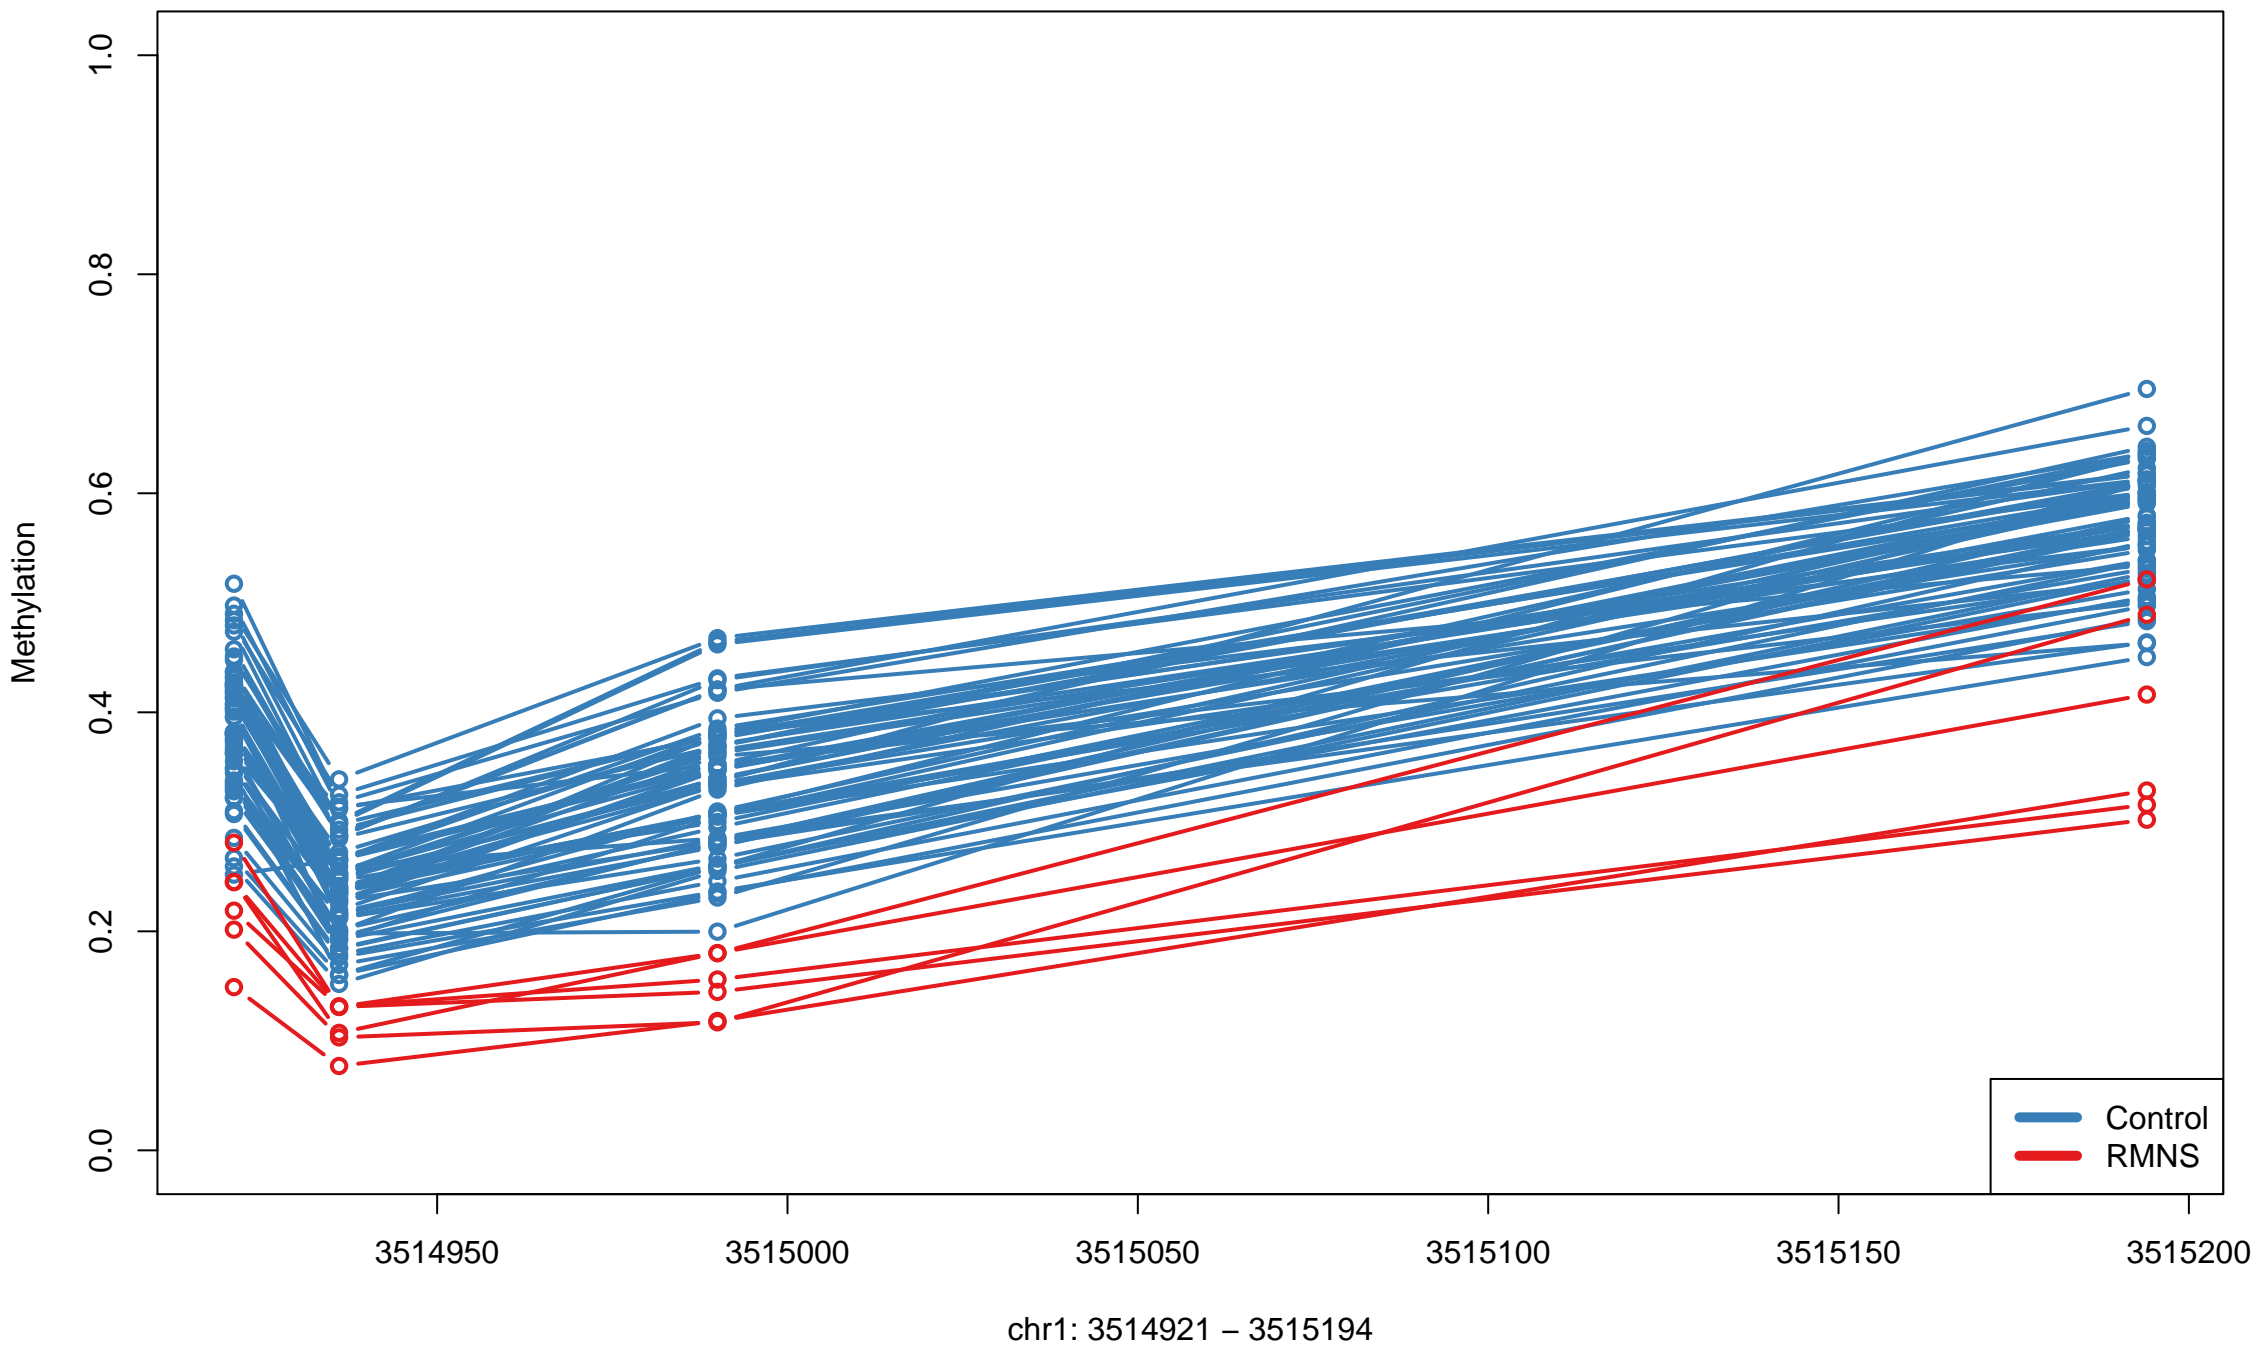

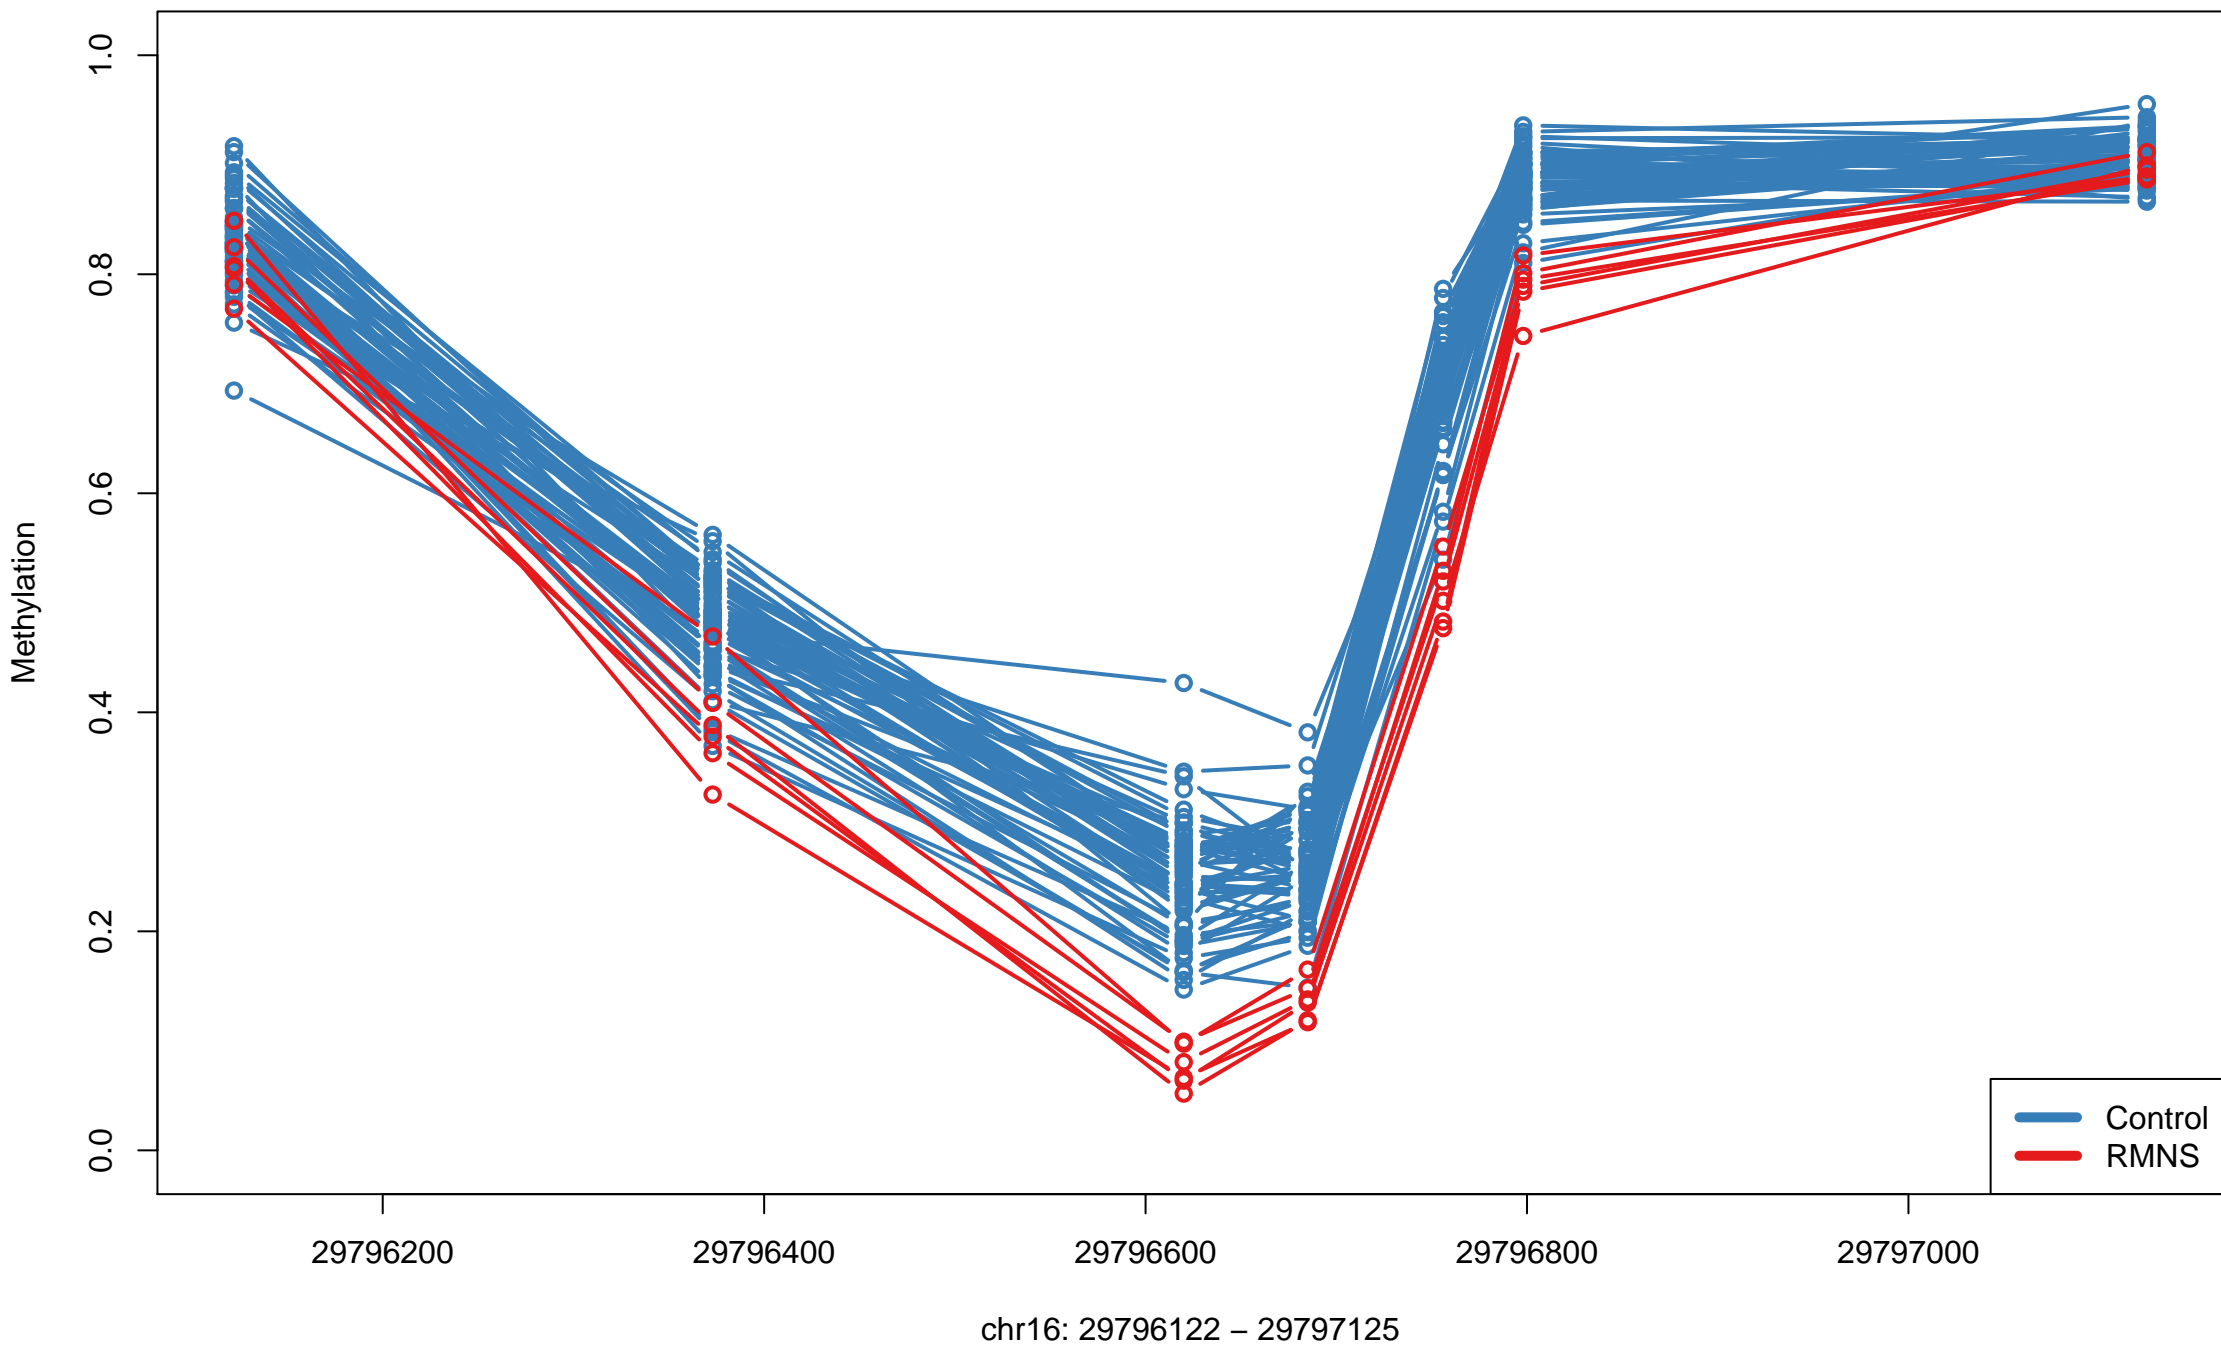

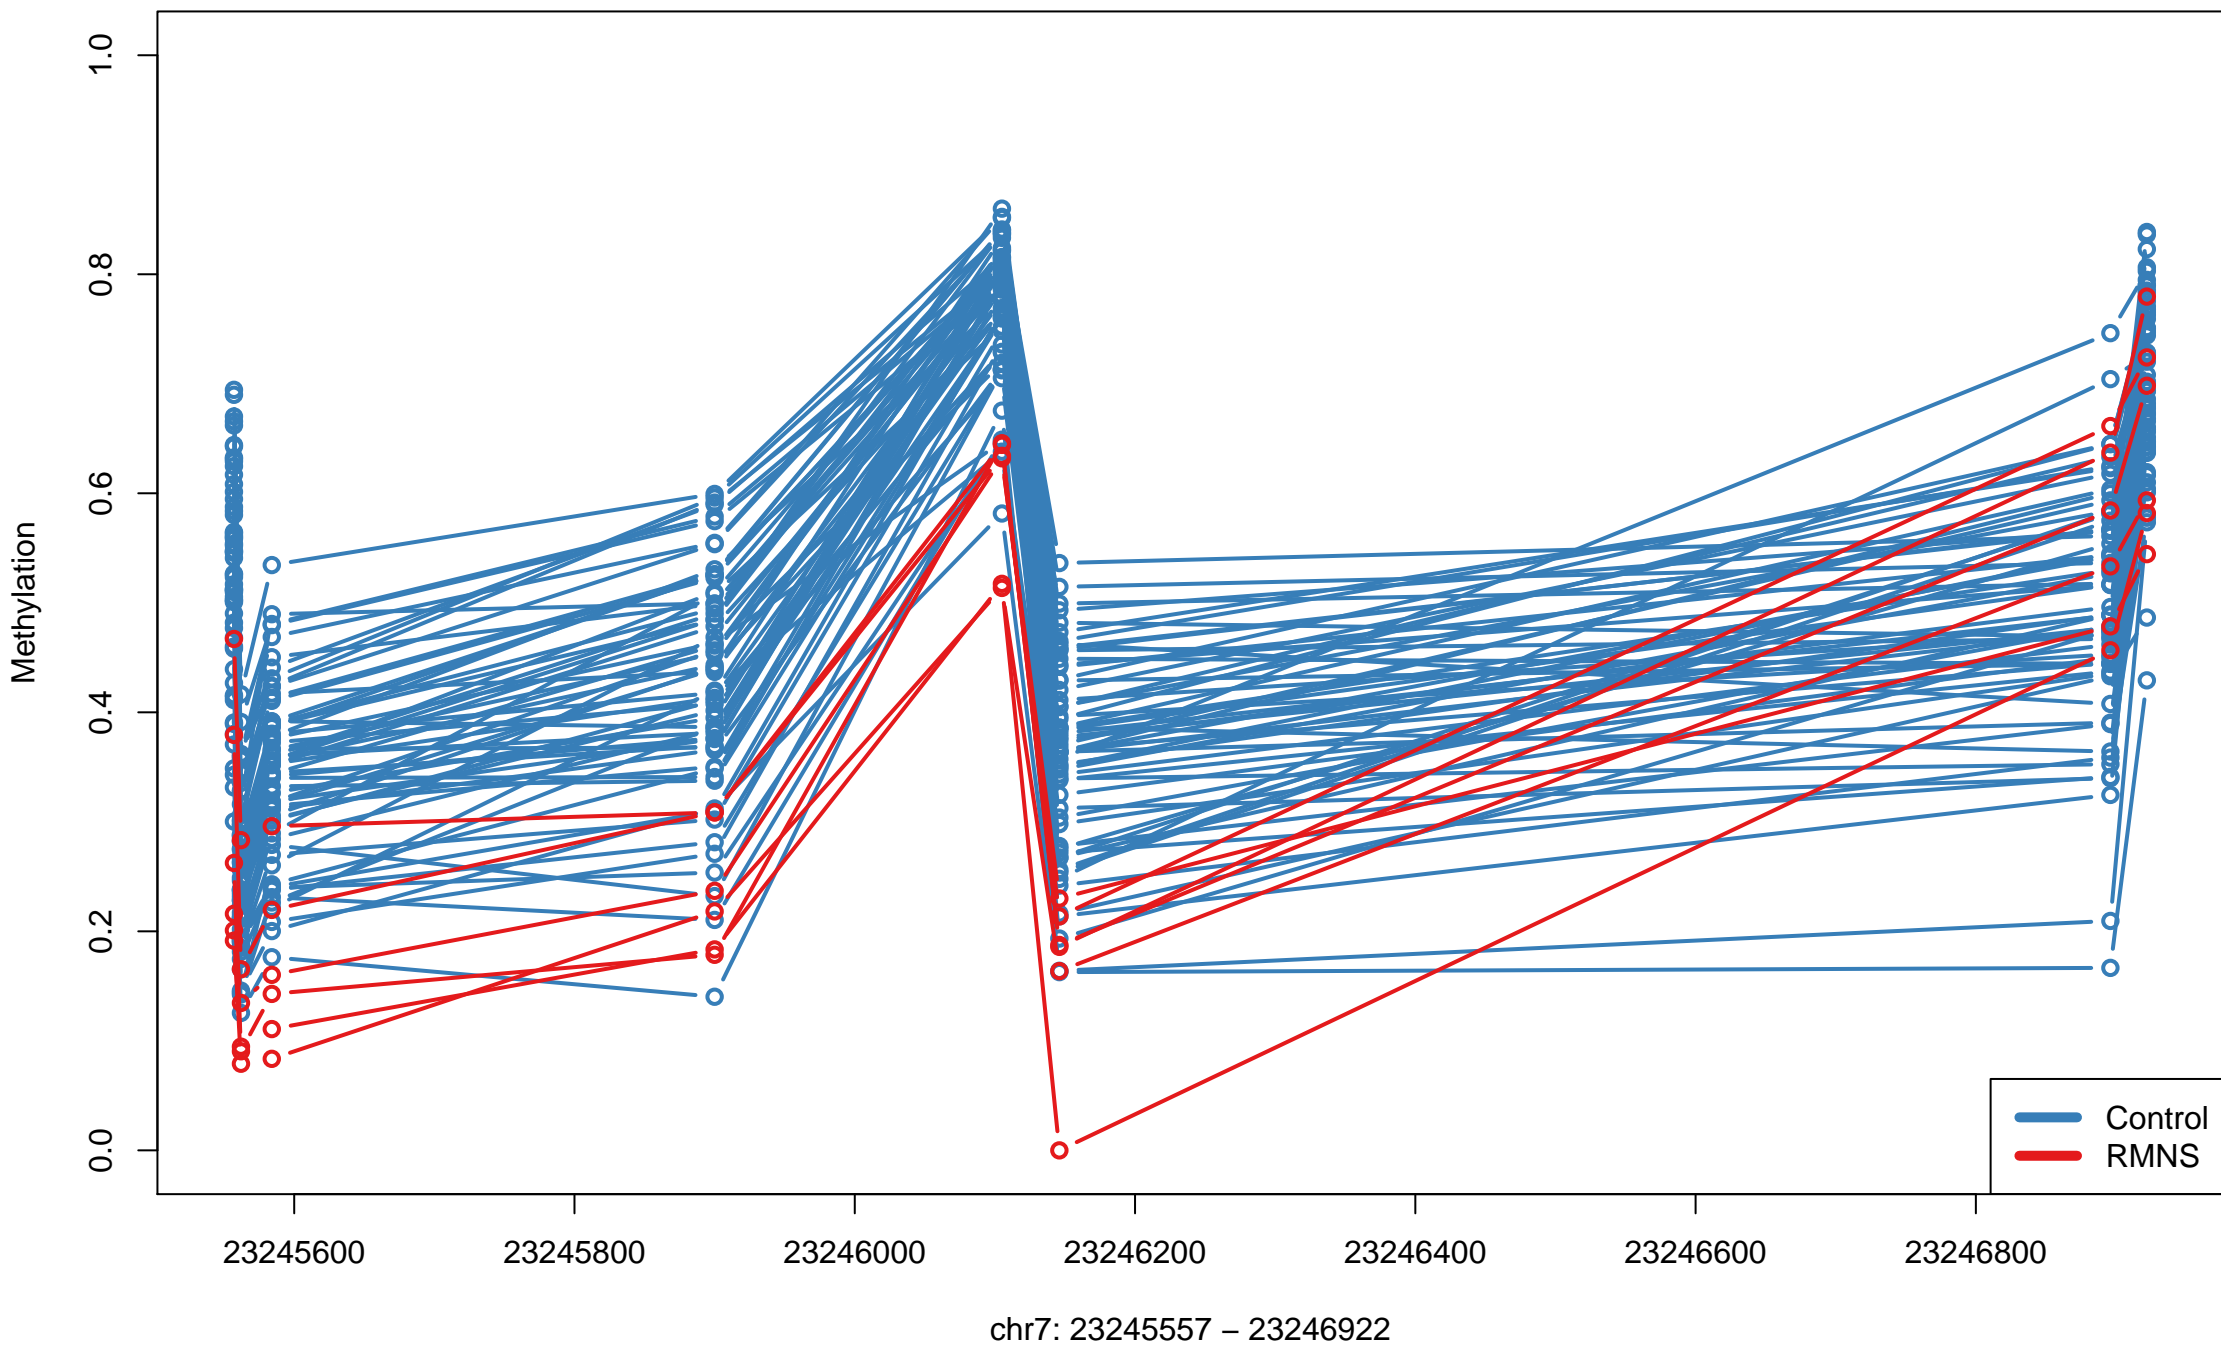



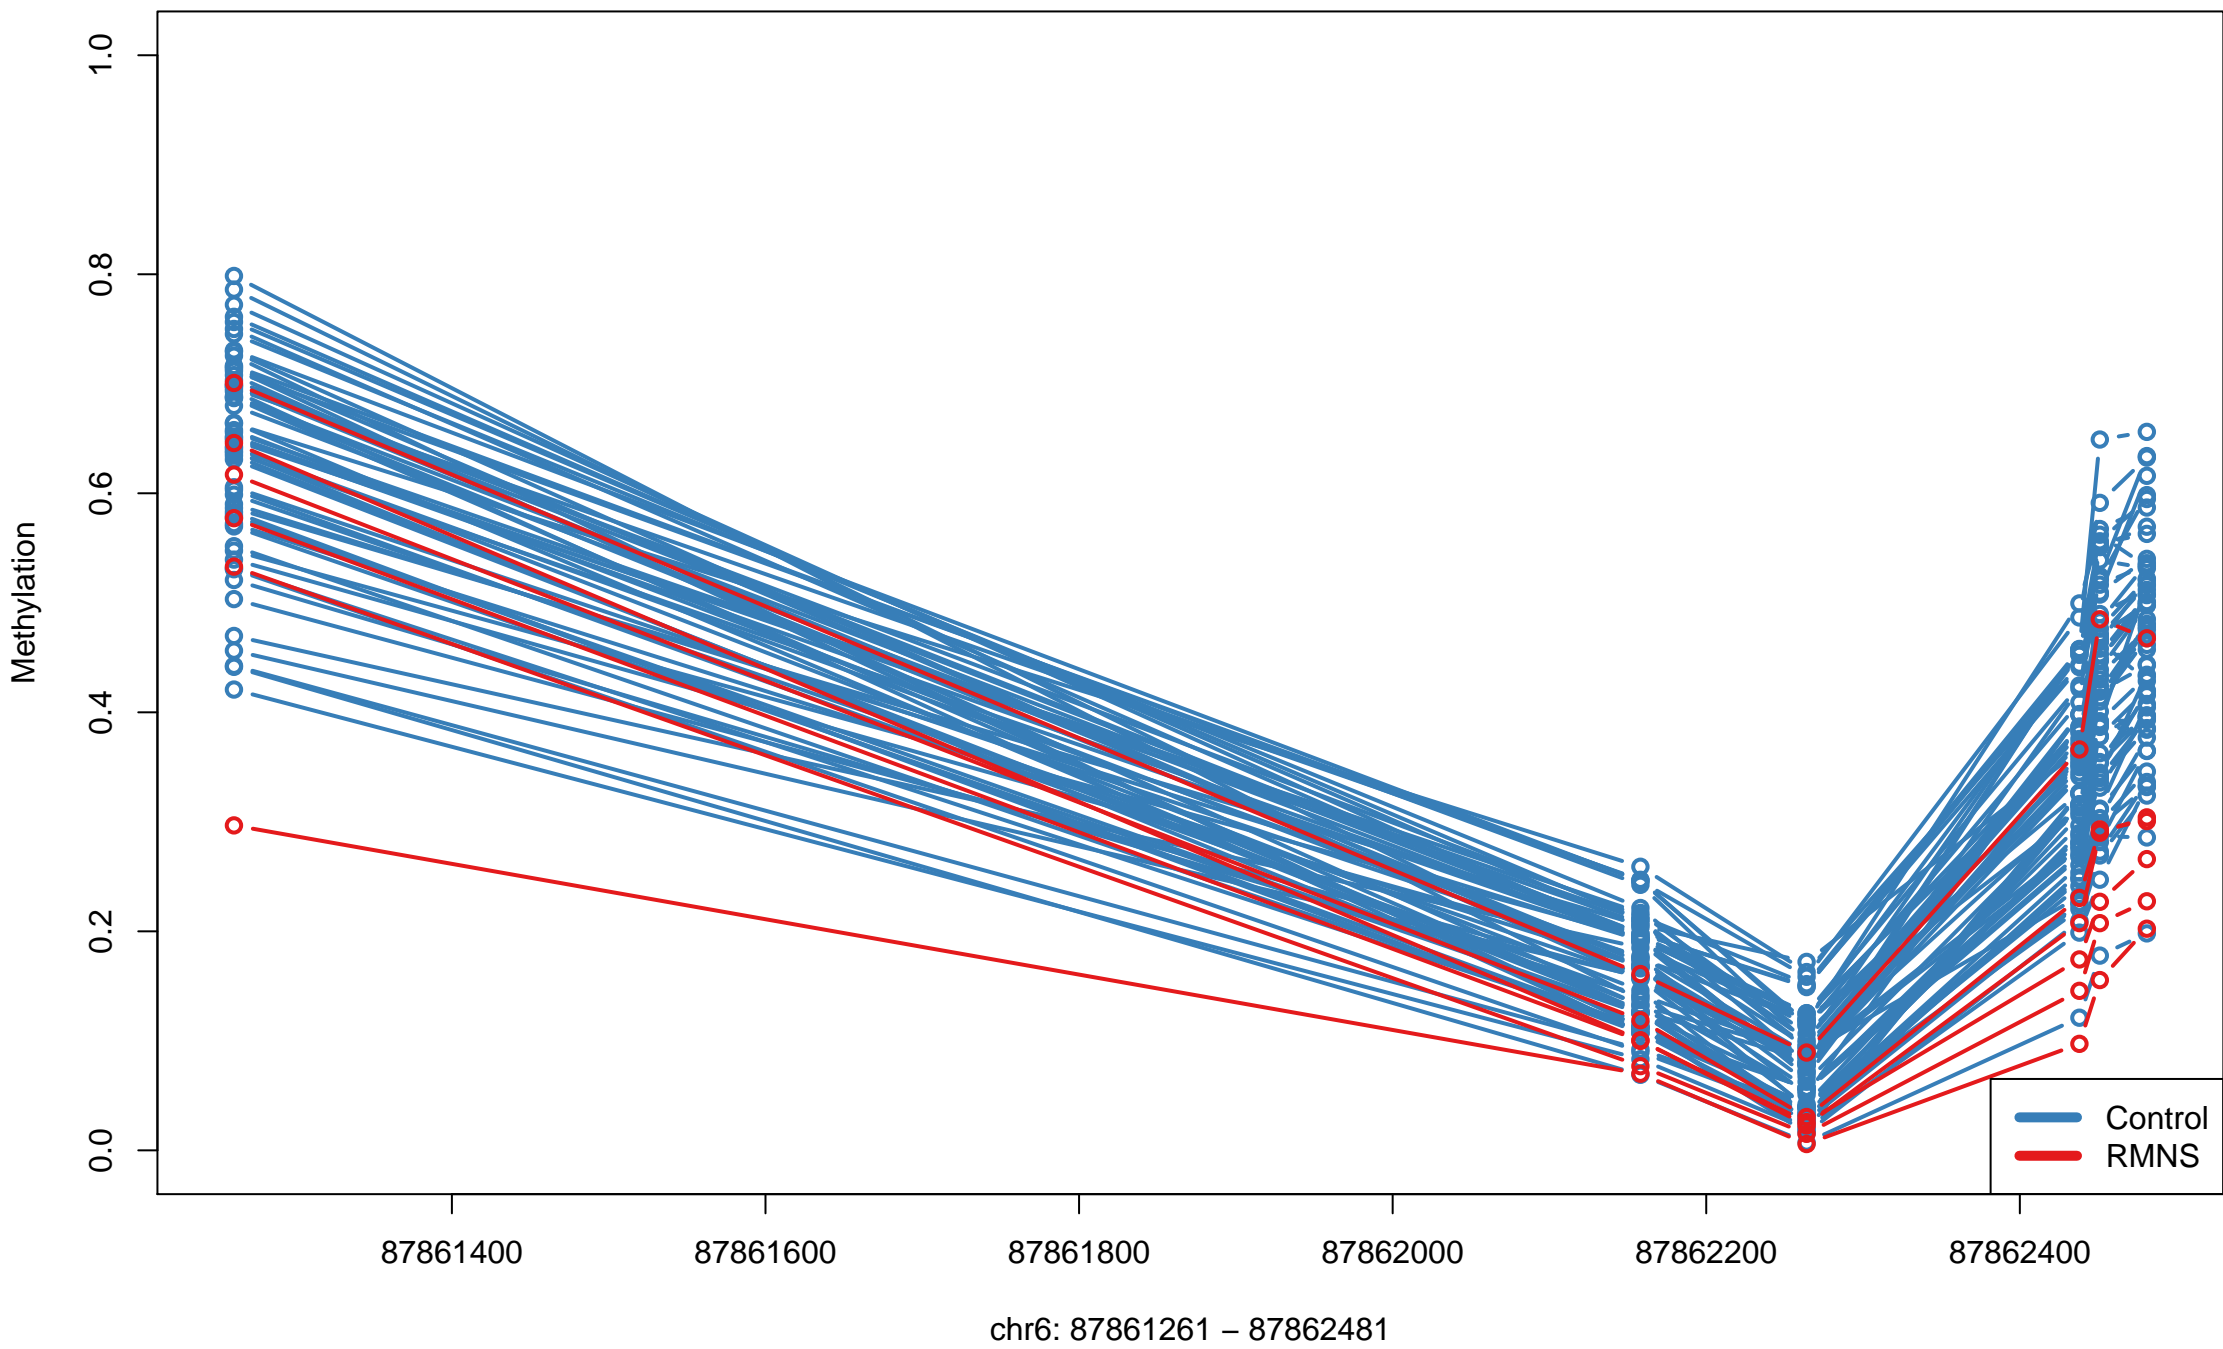

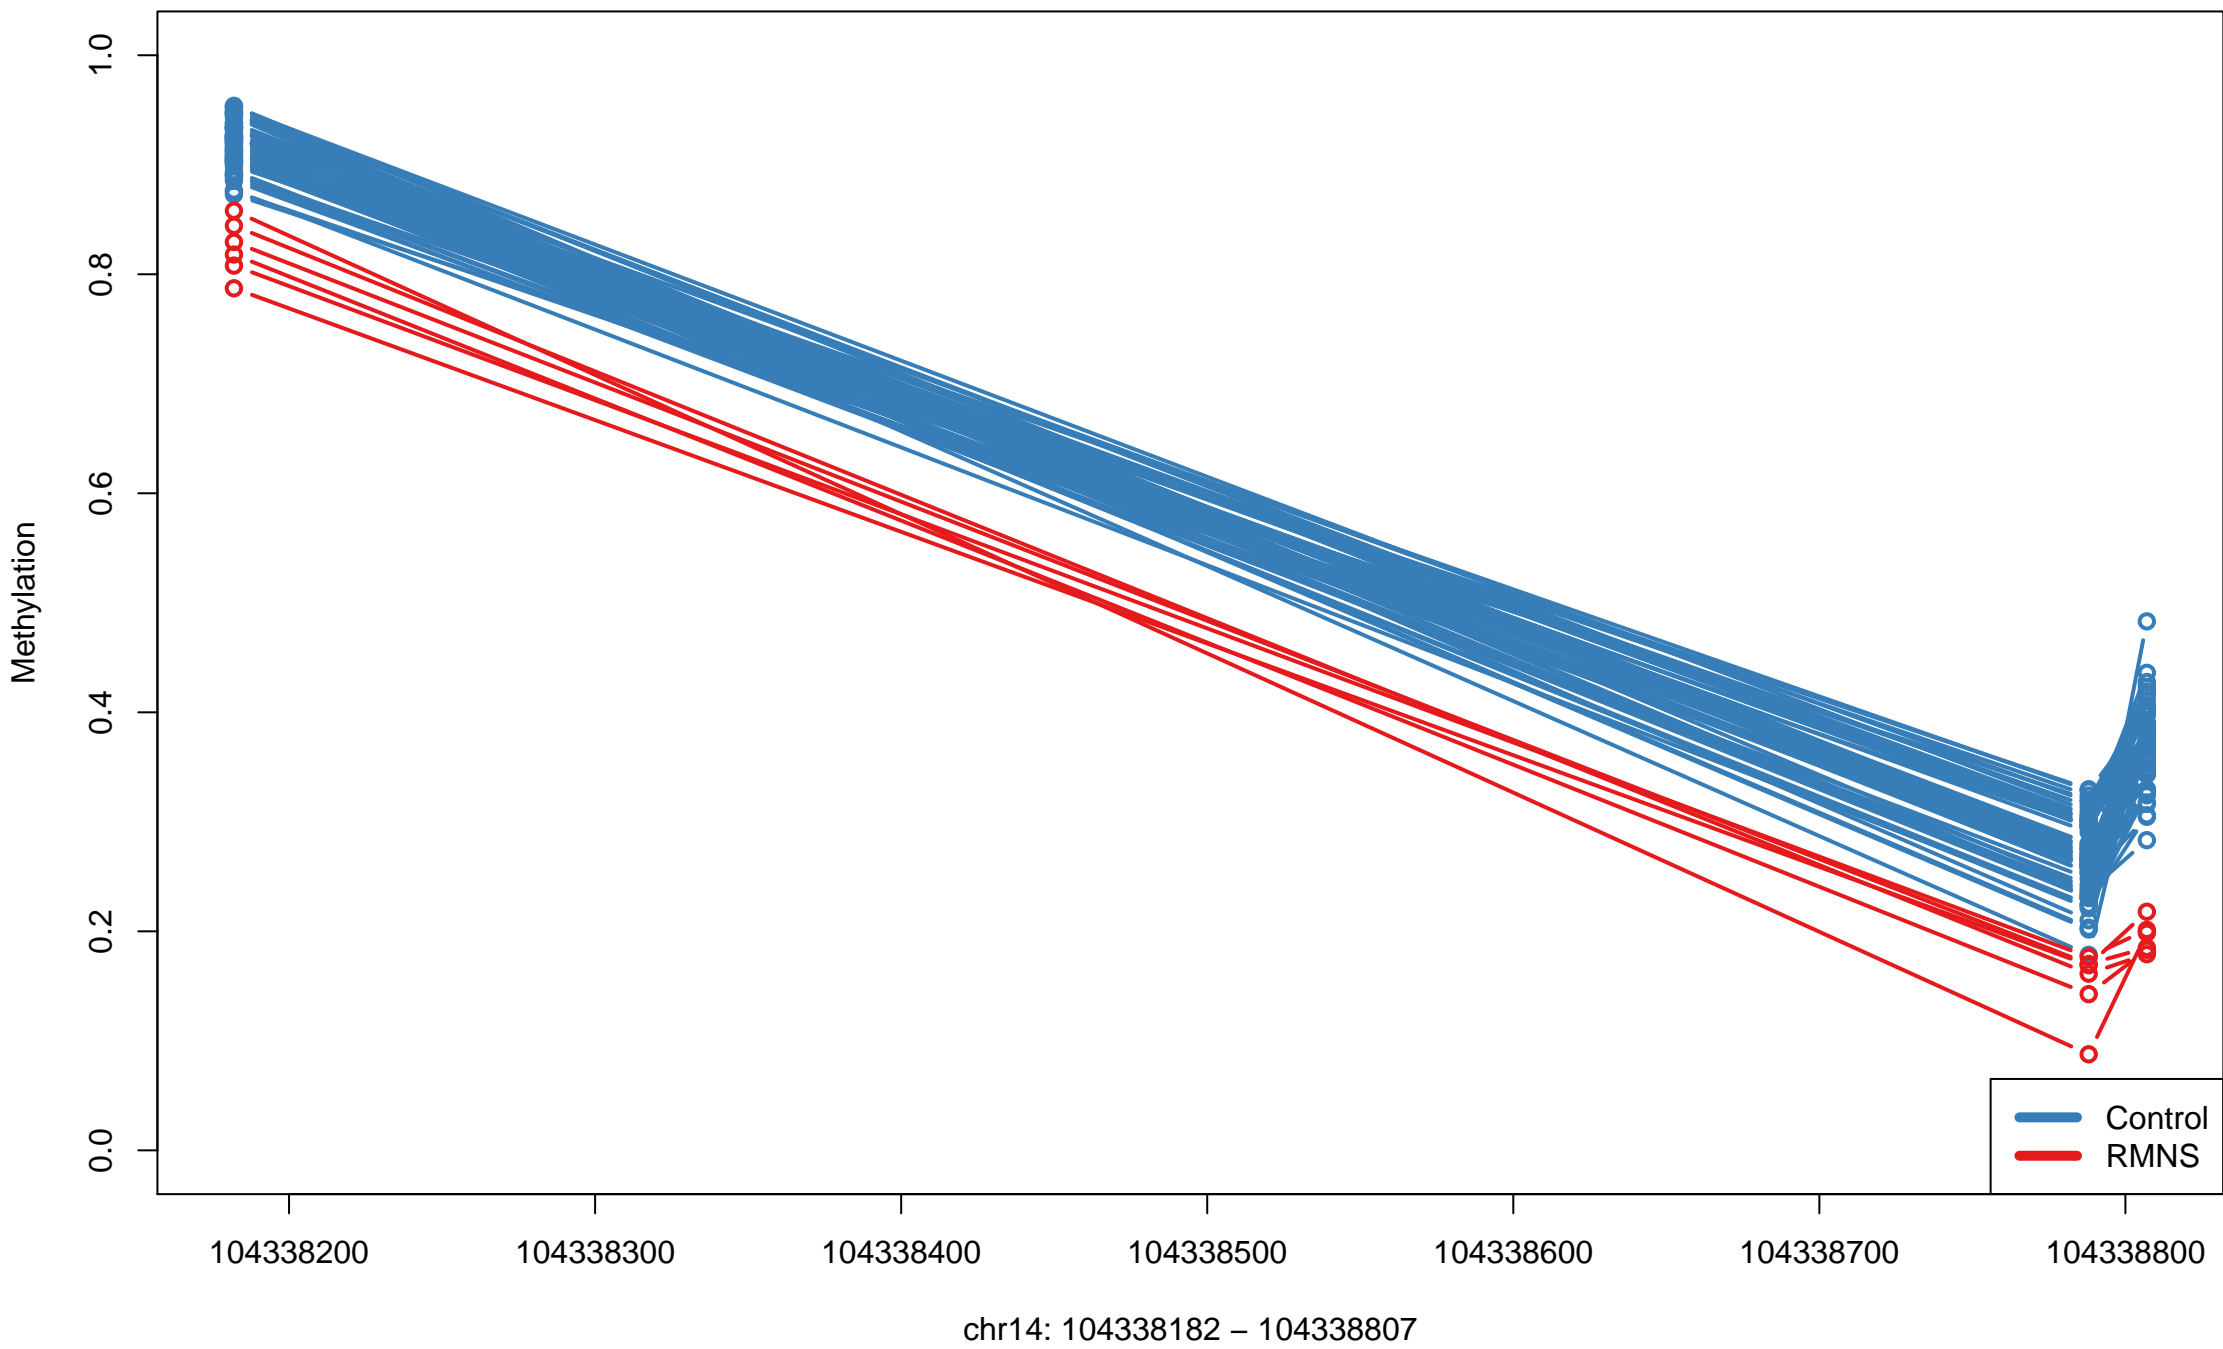

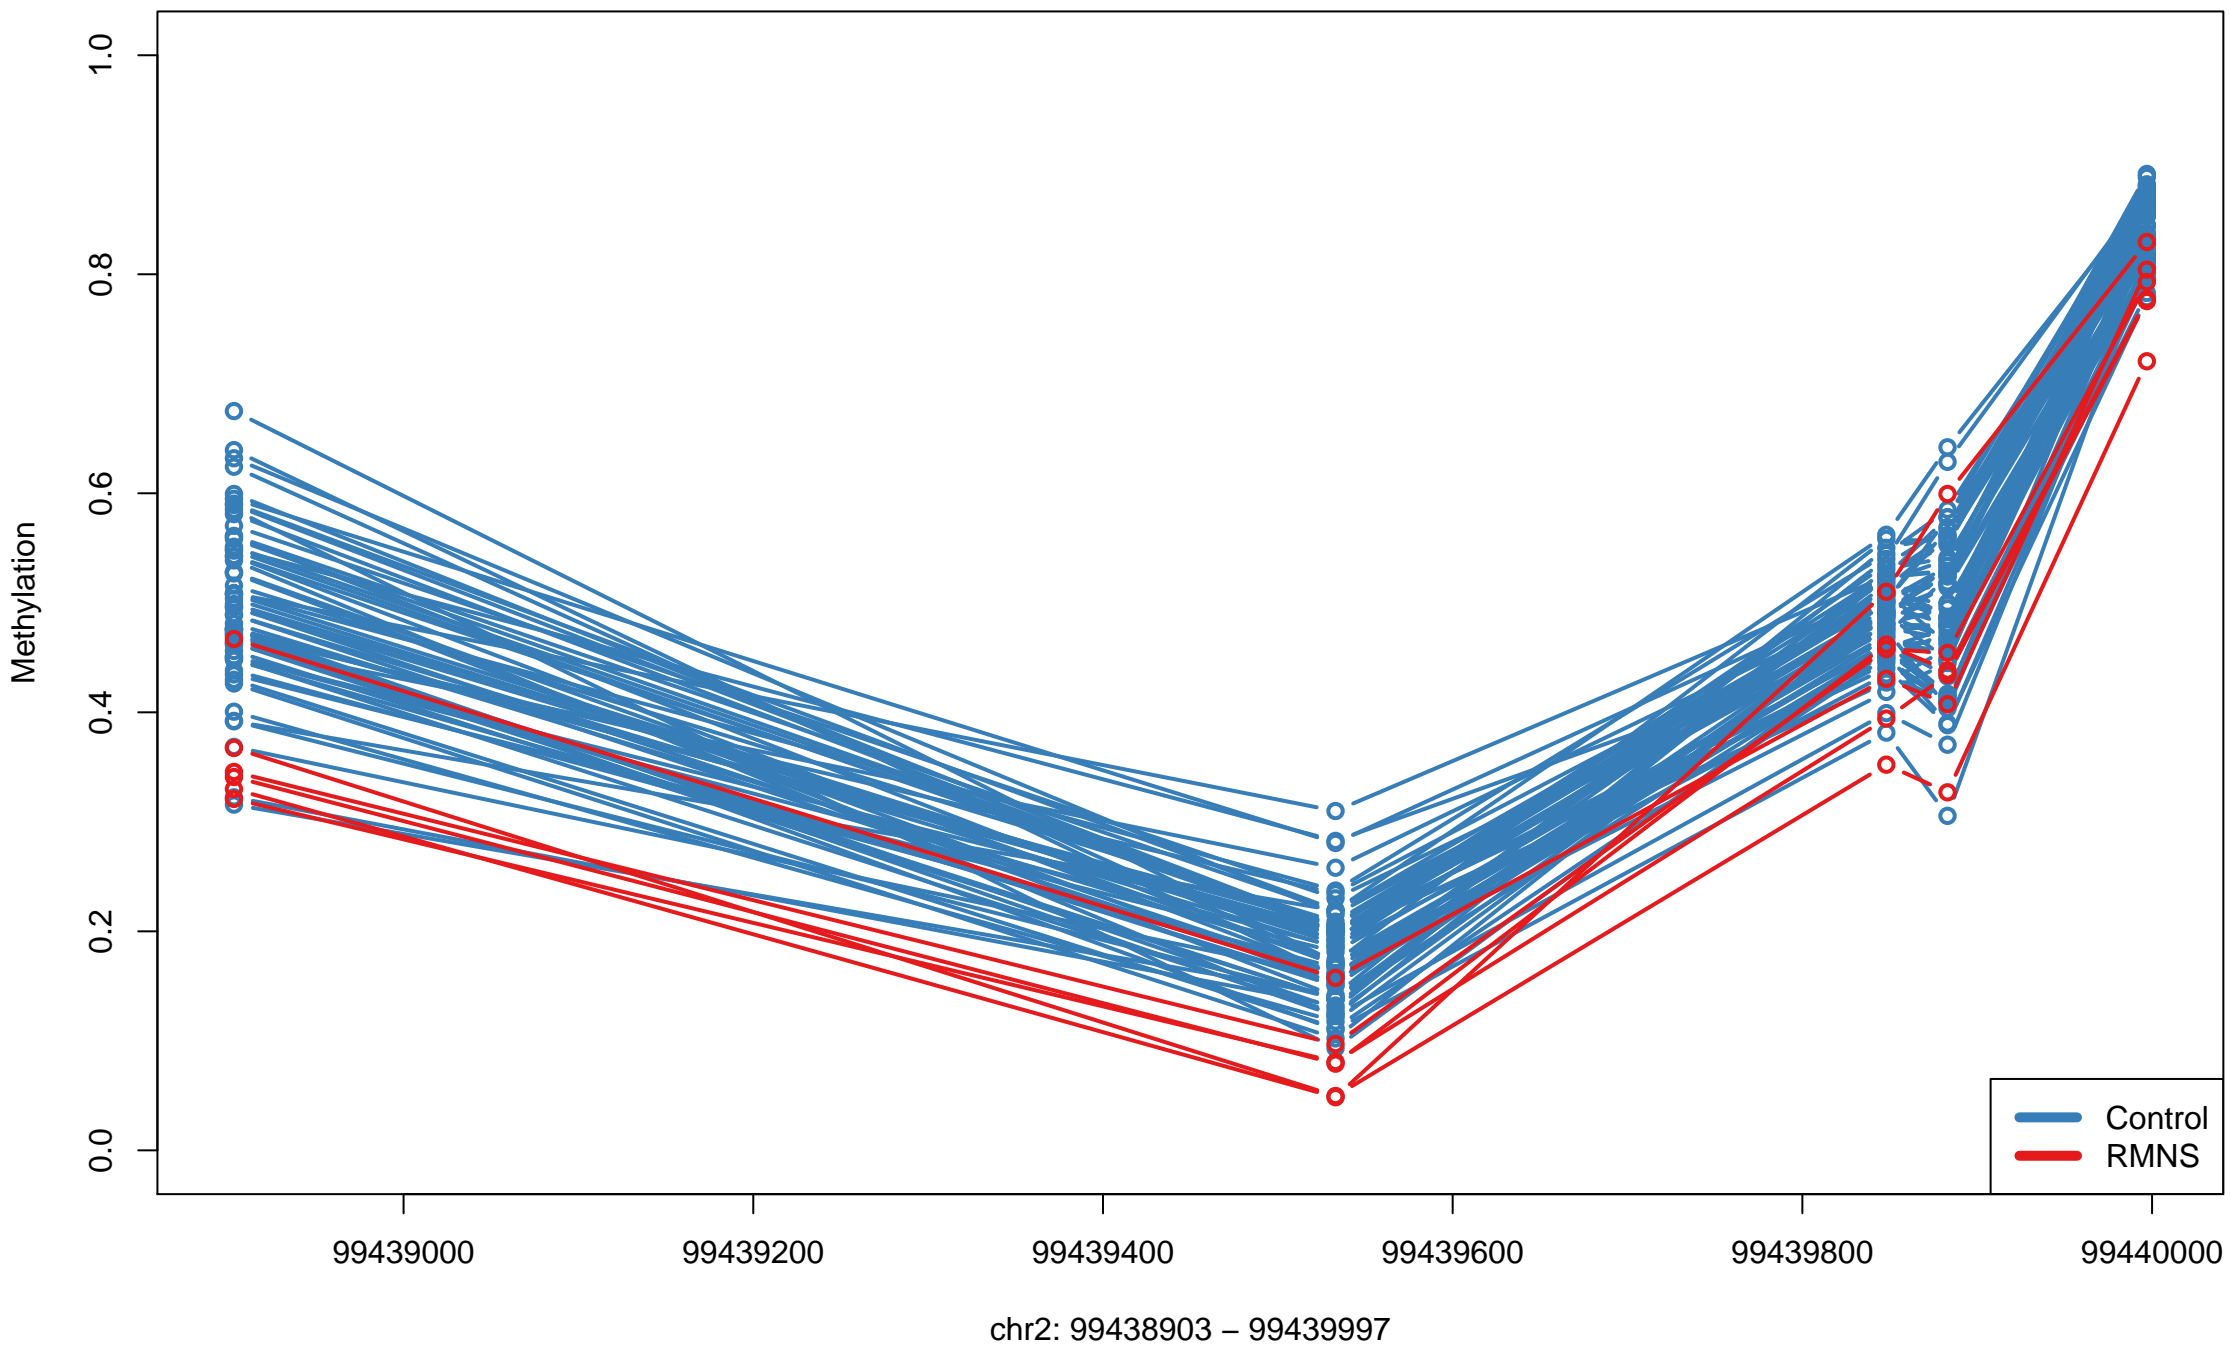

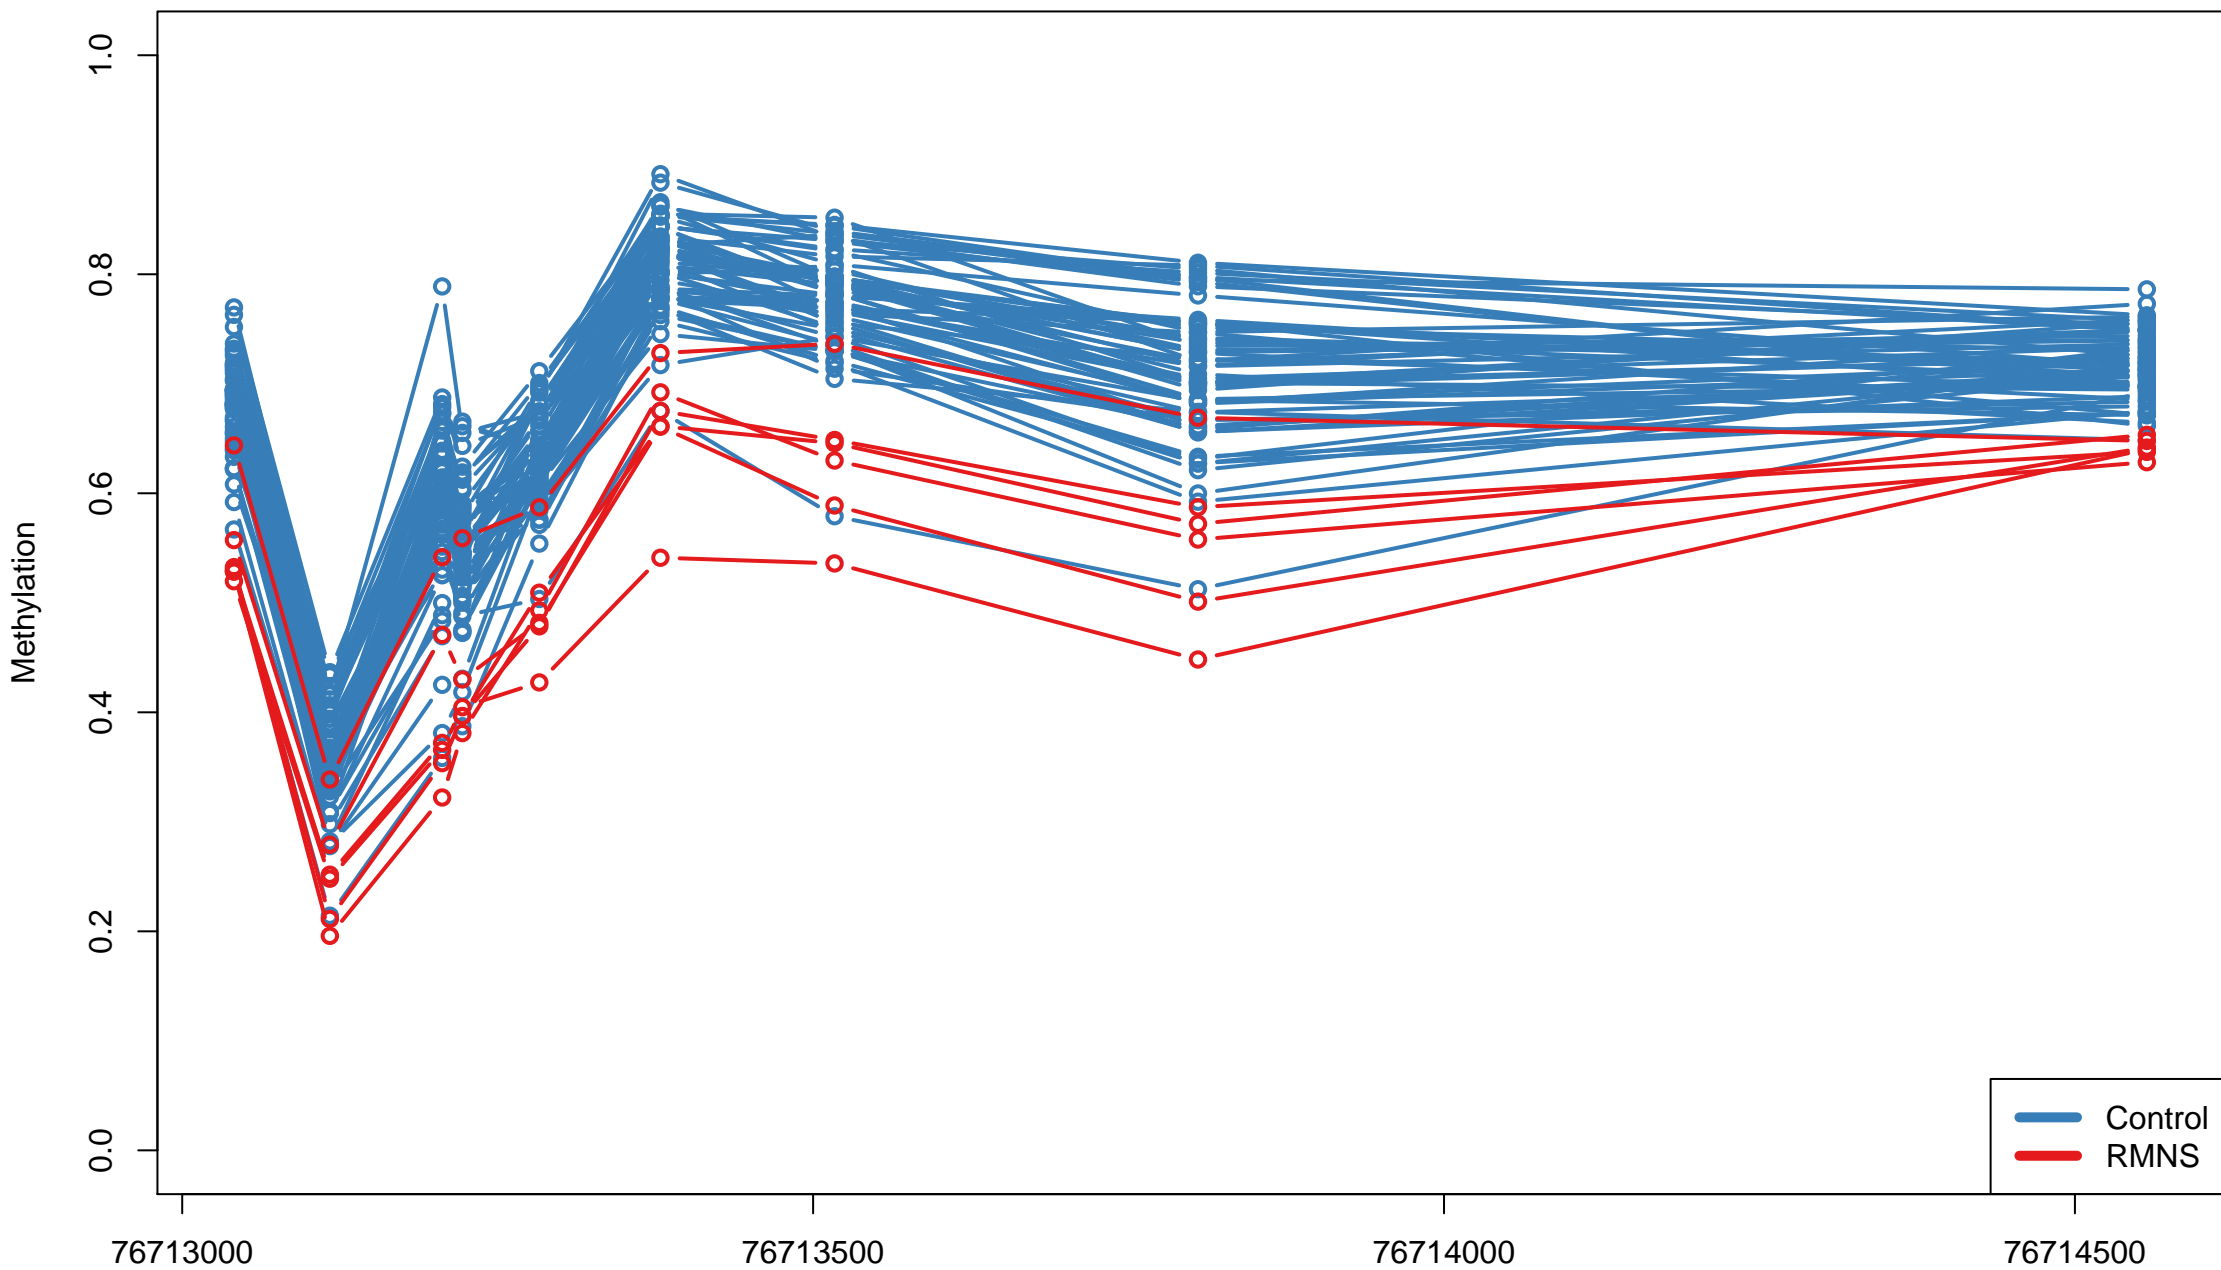

chr17: 76713041 – 76714557

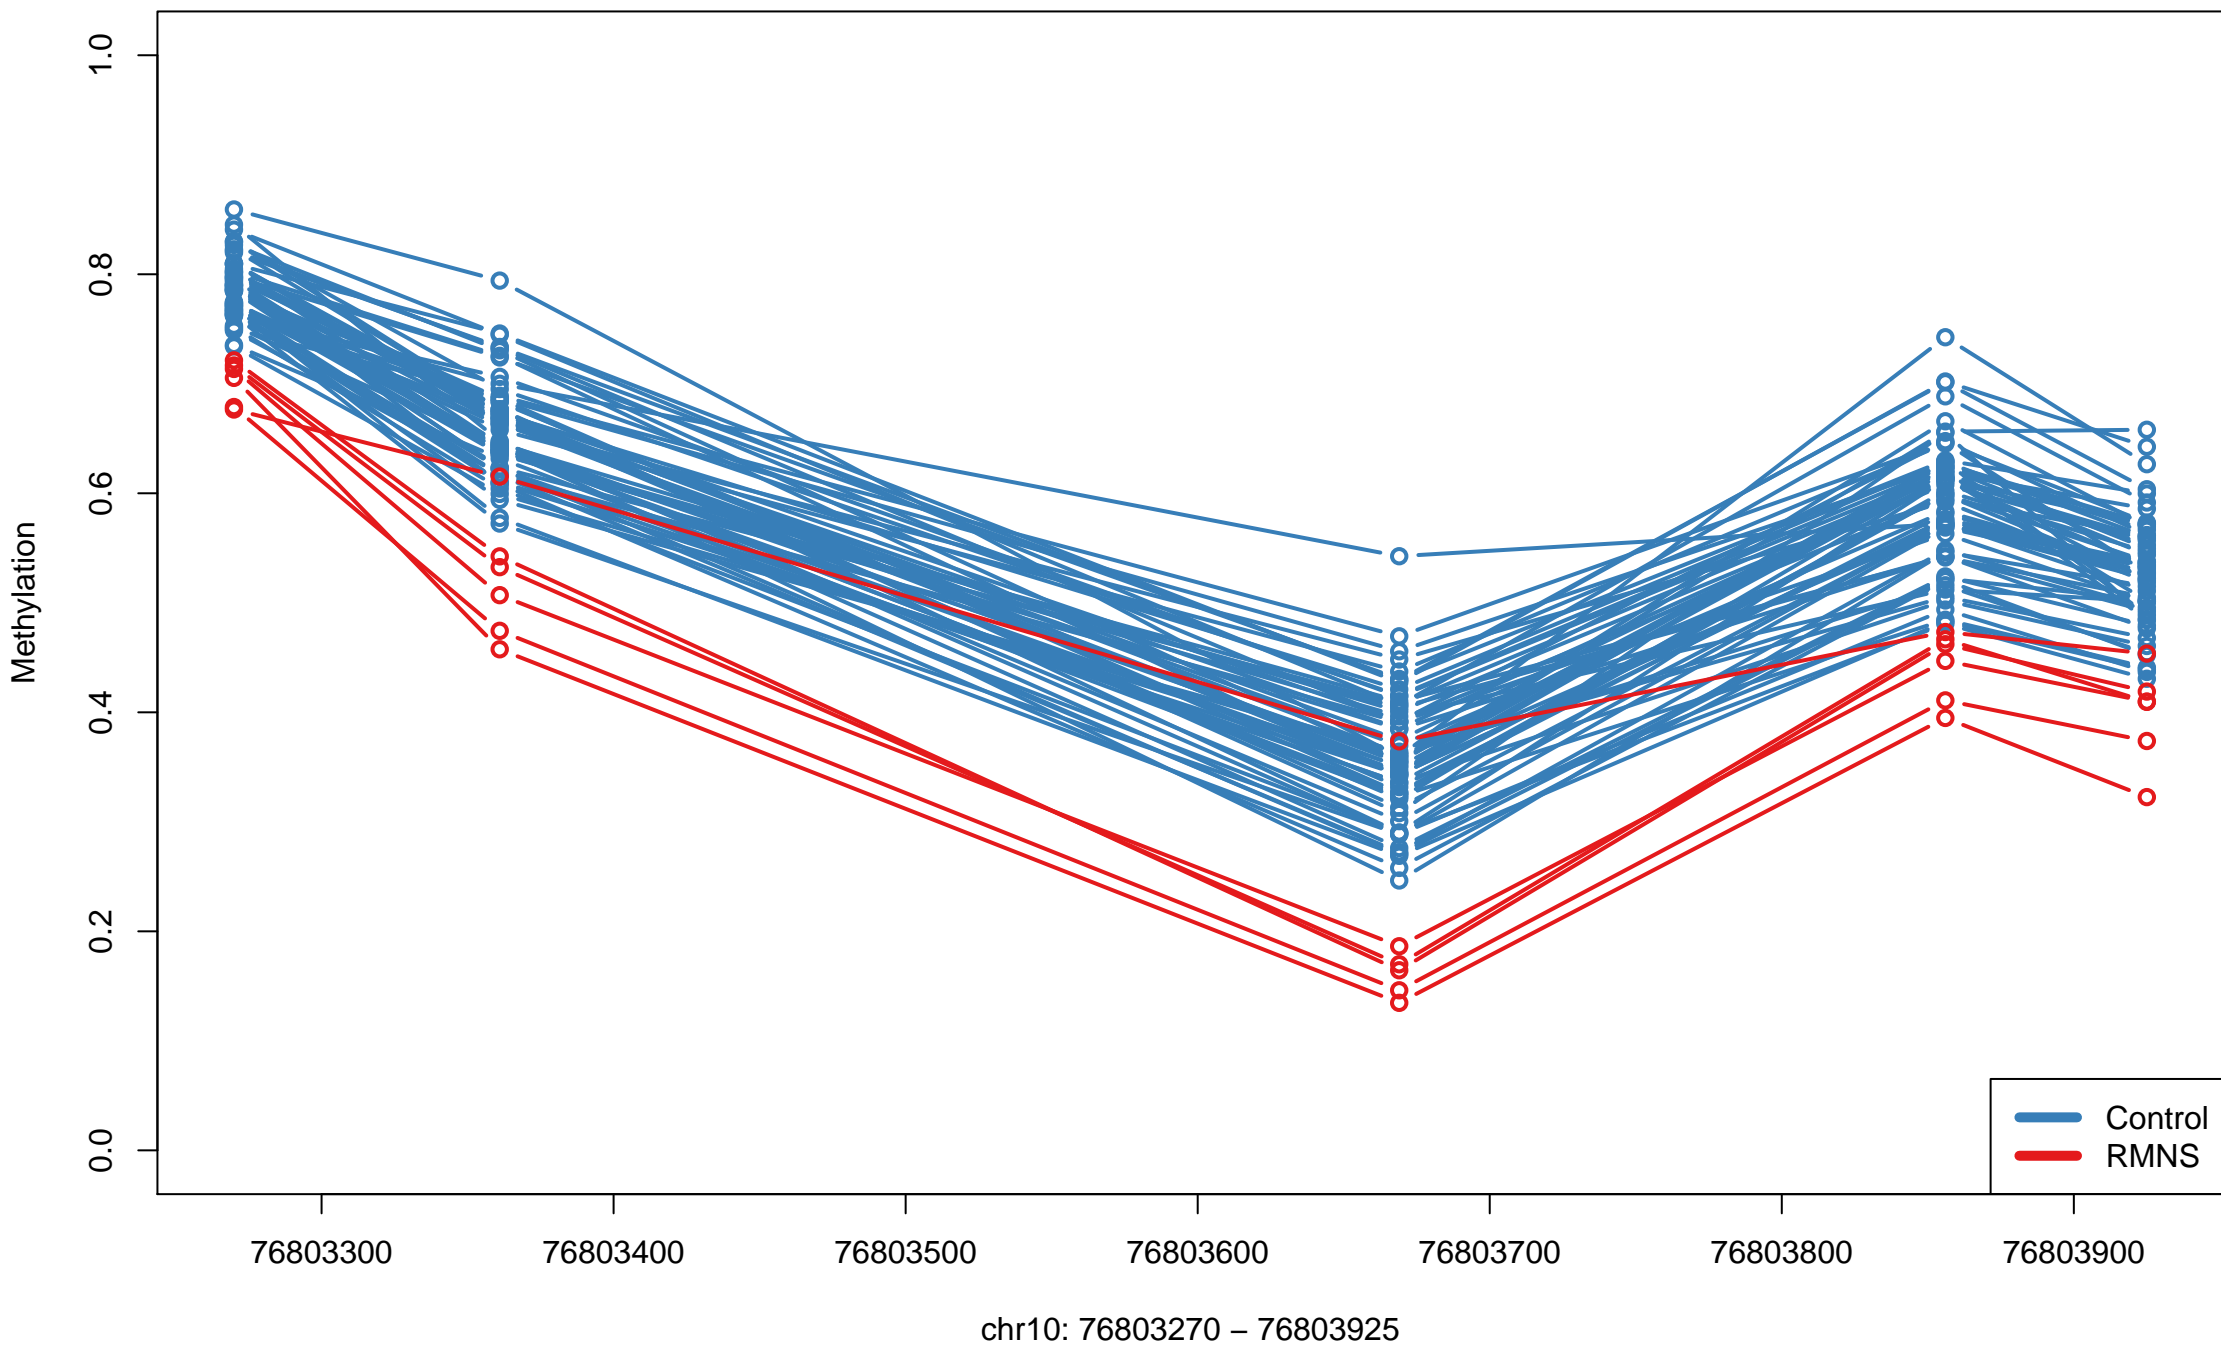

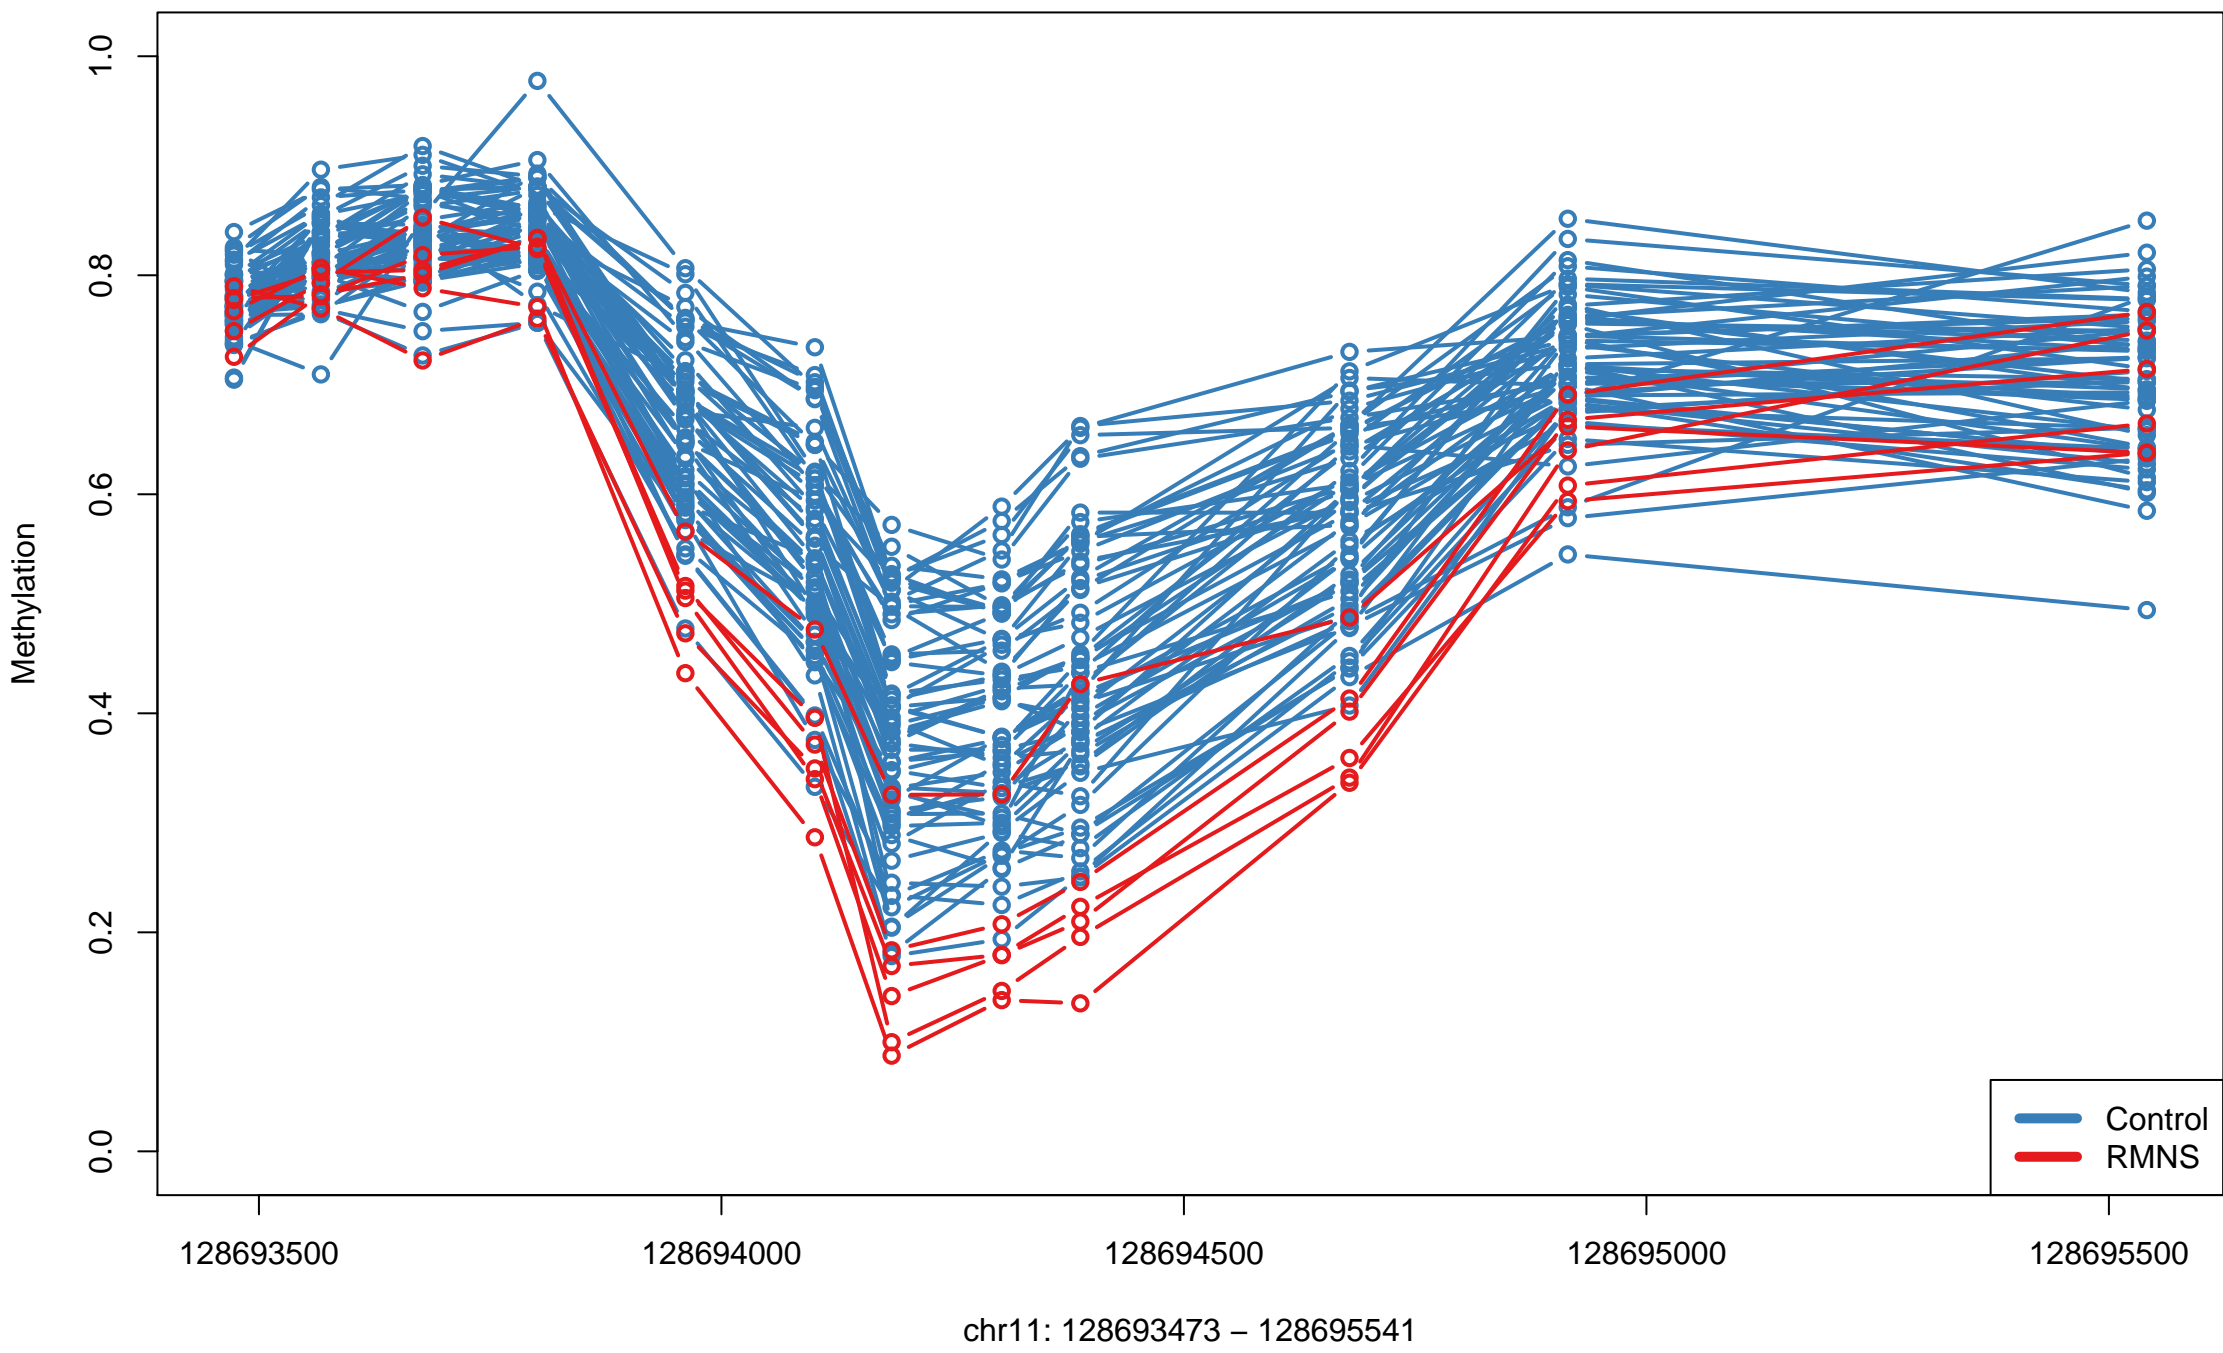

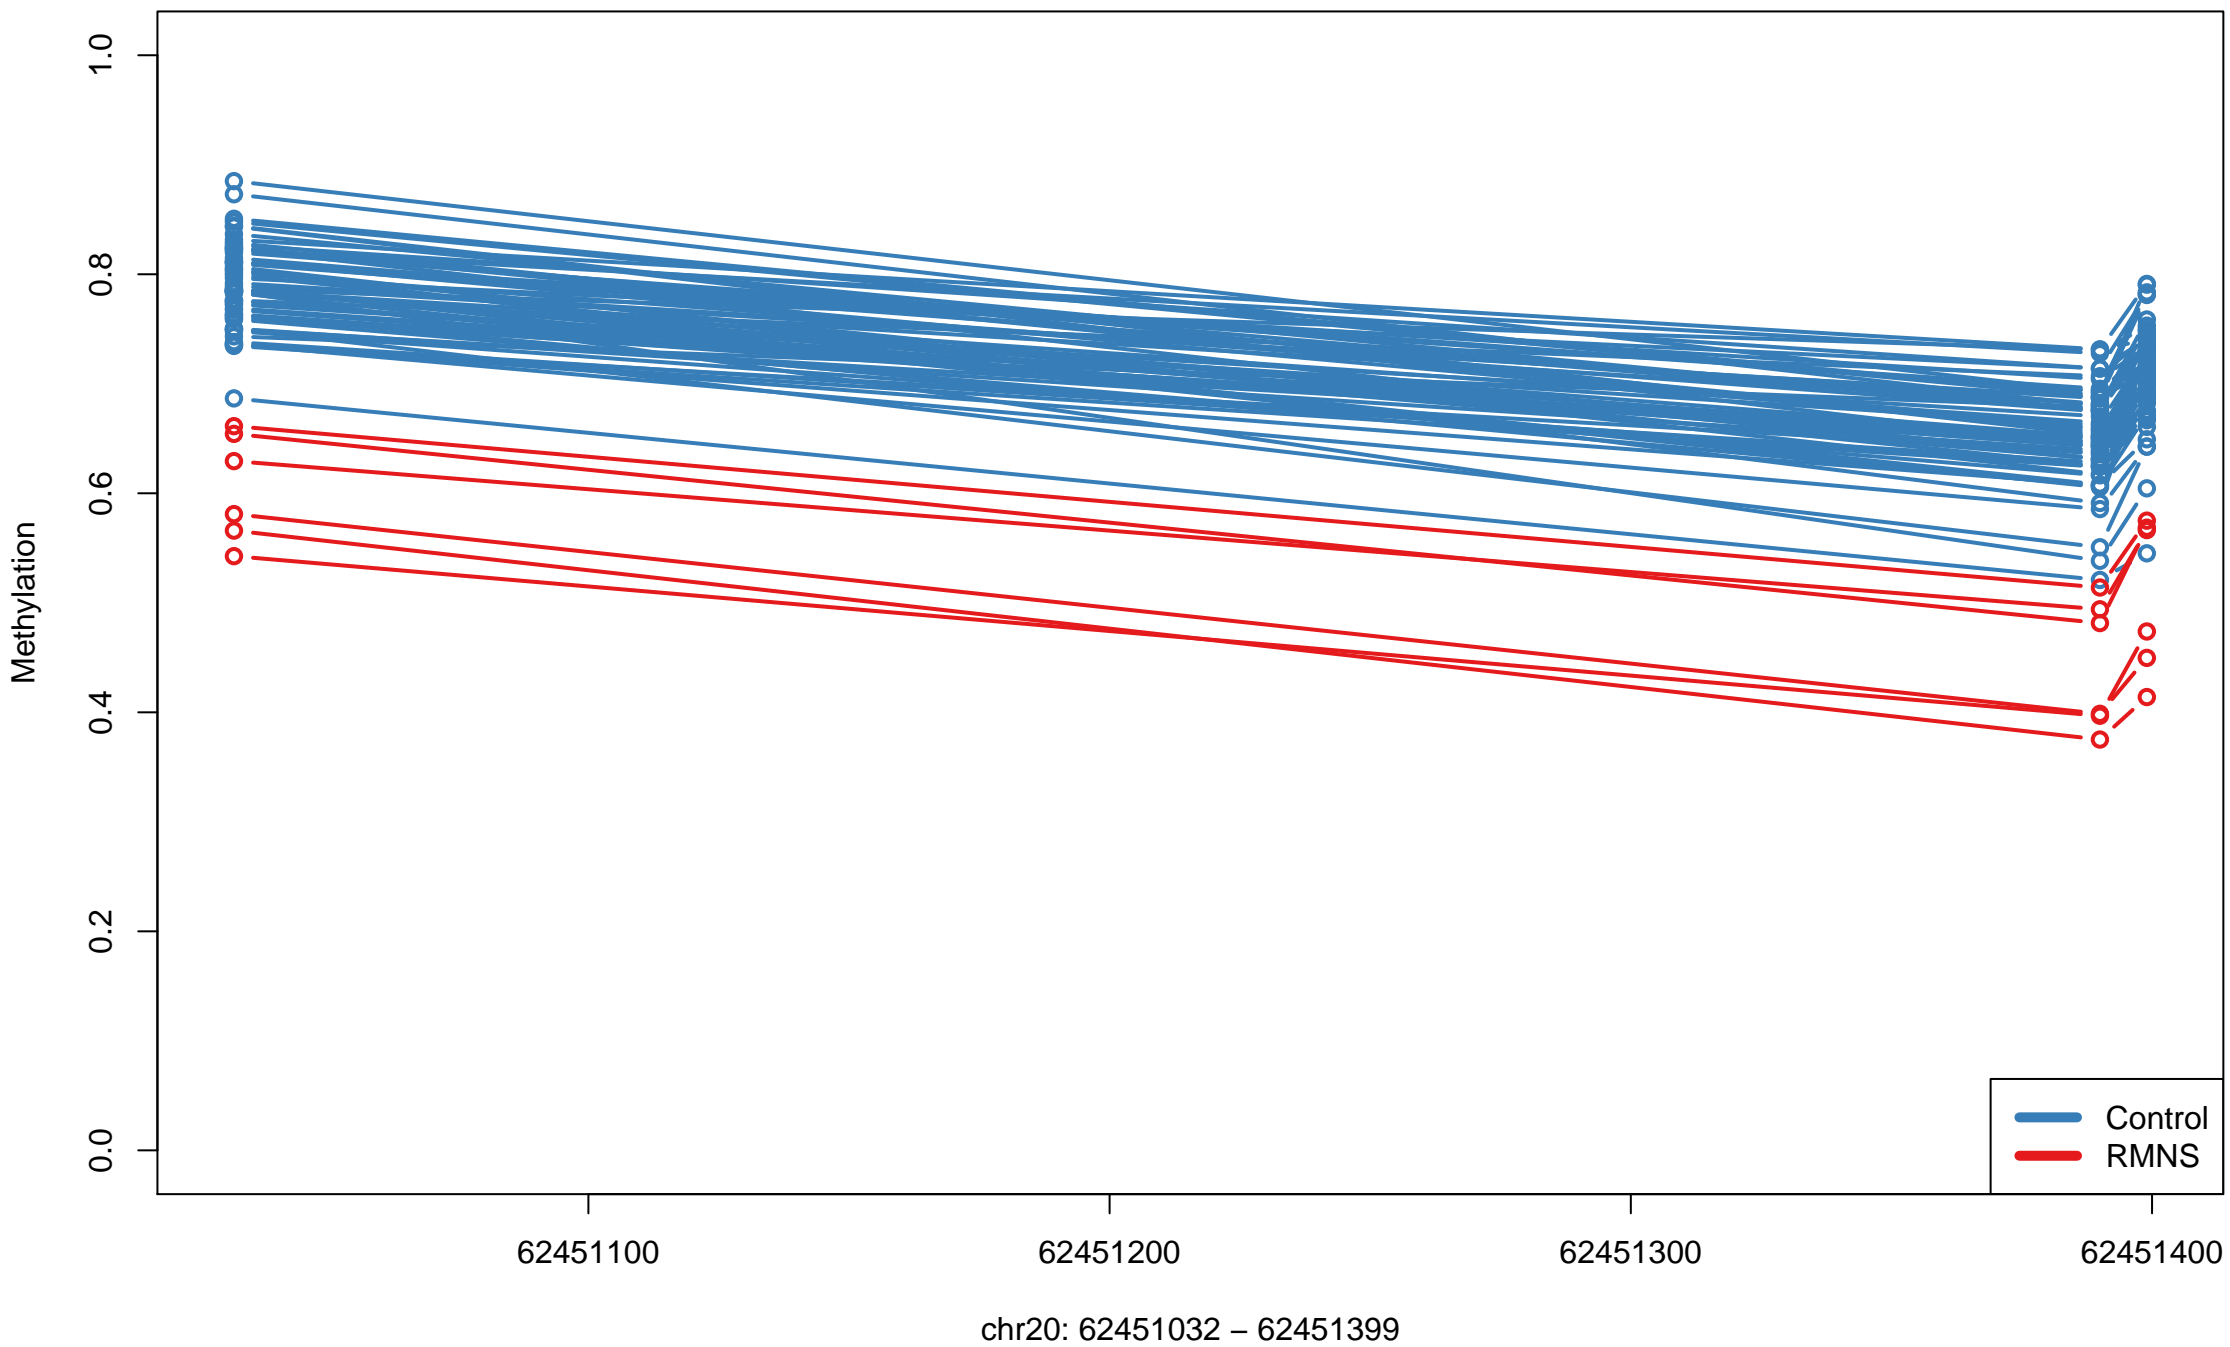



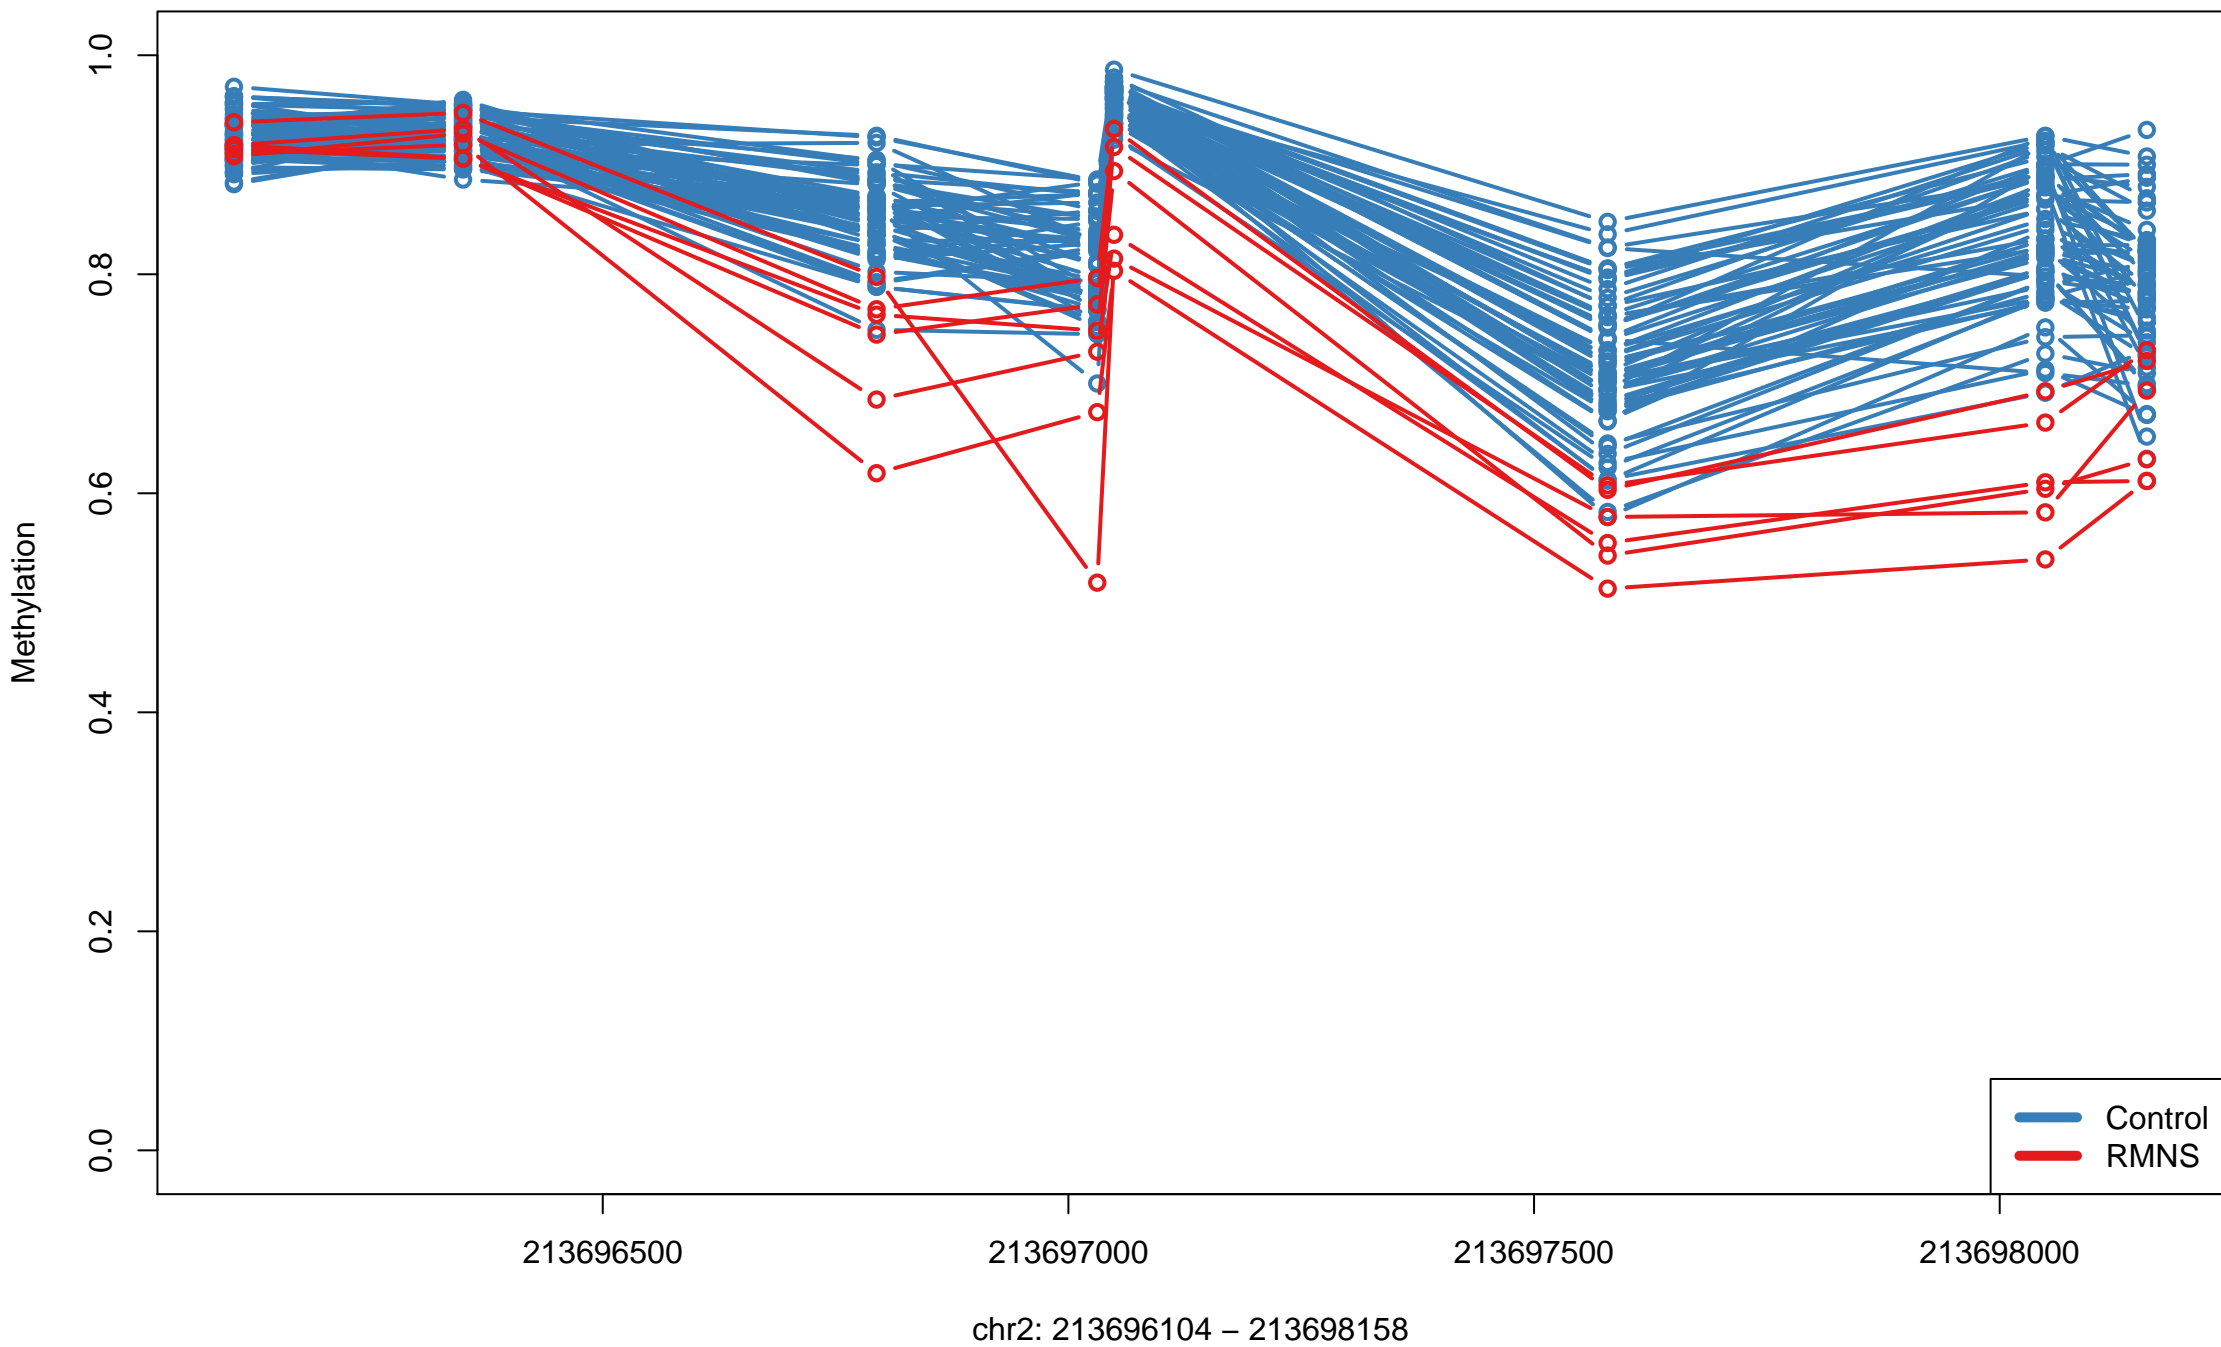

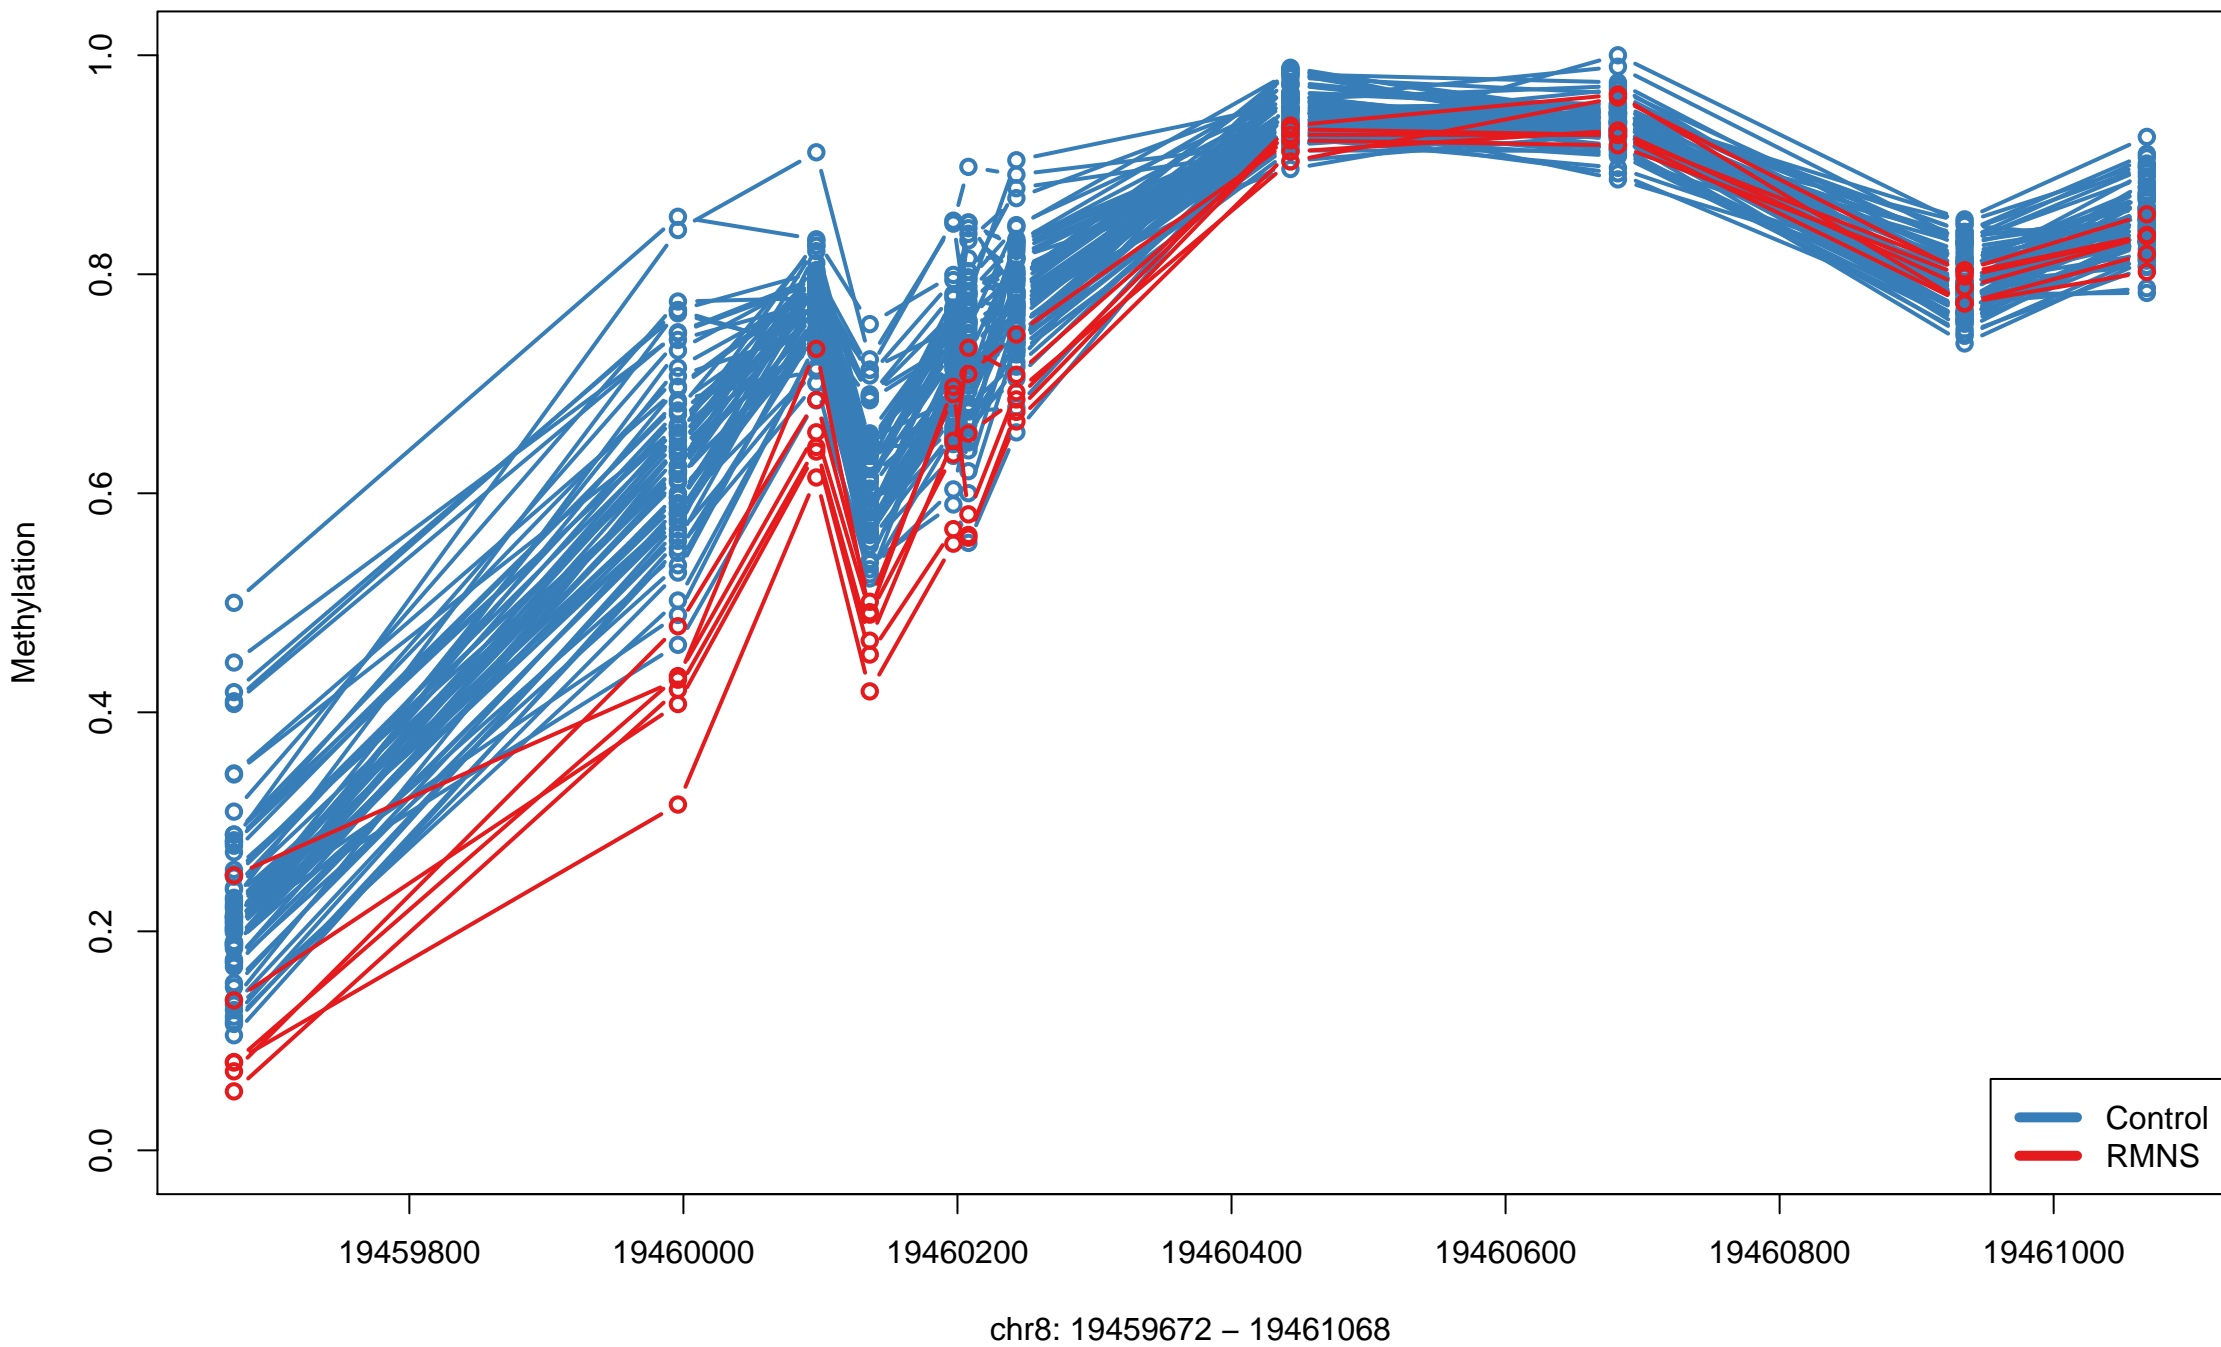

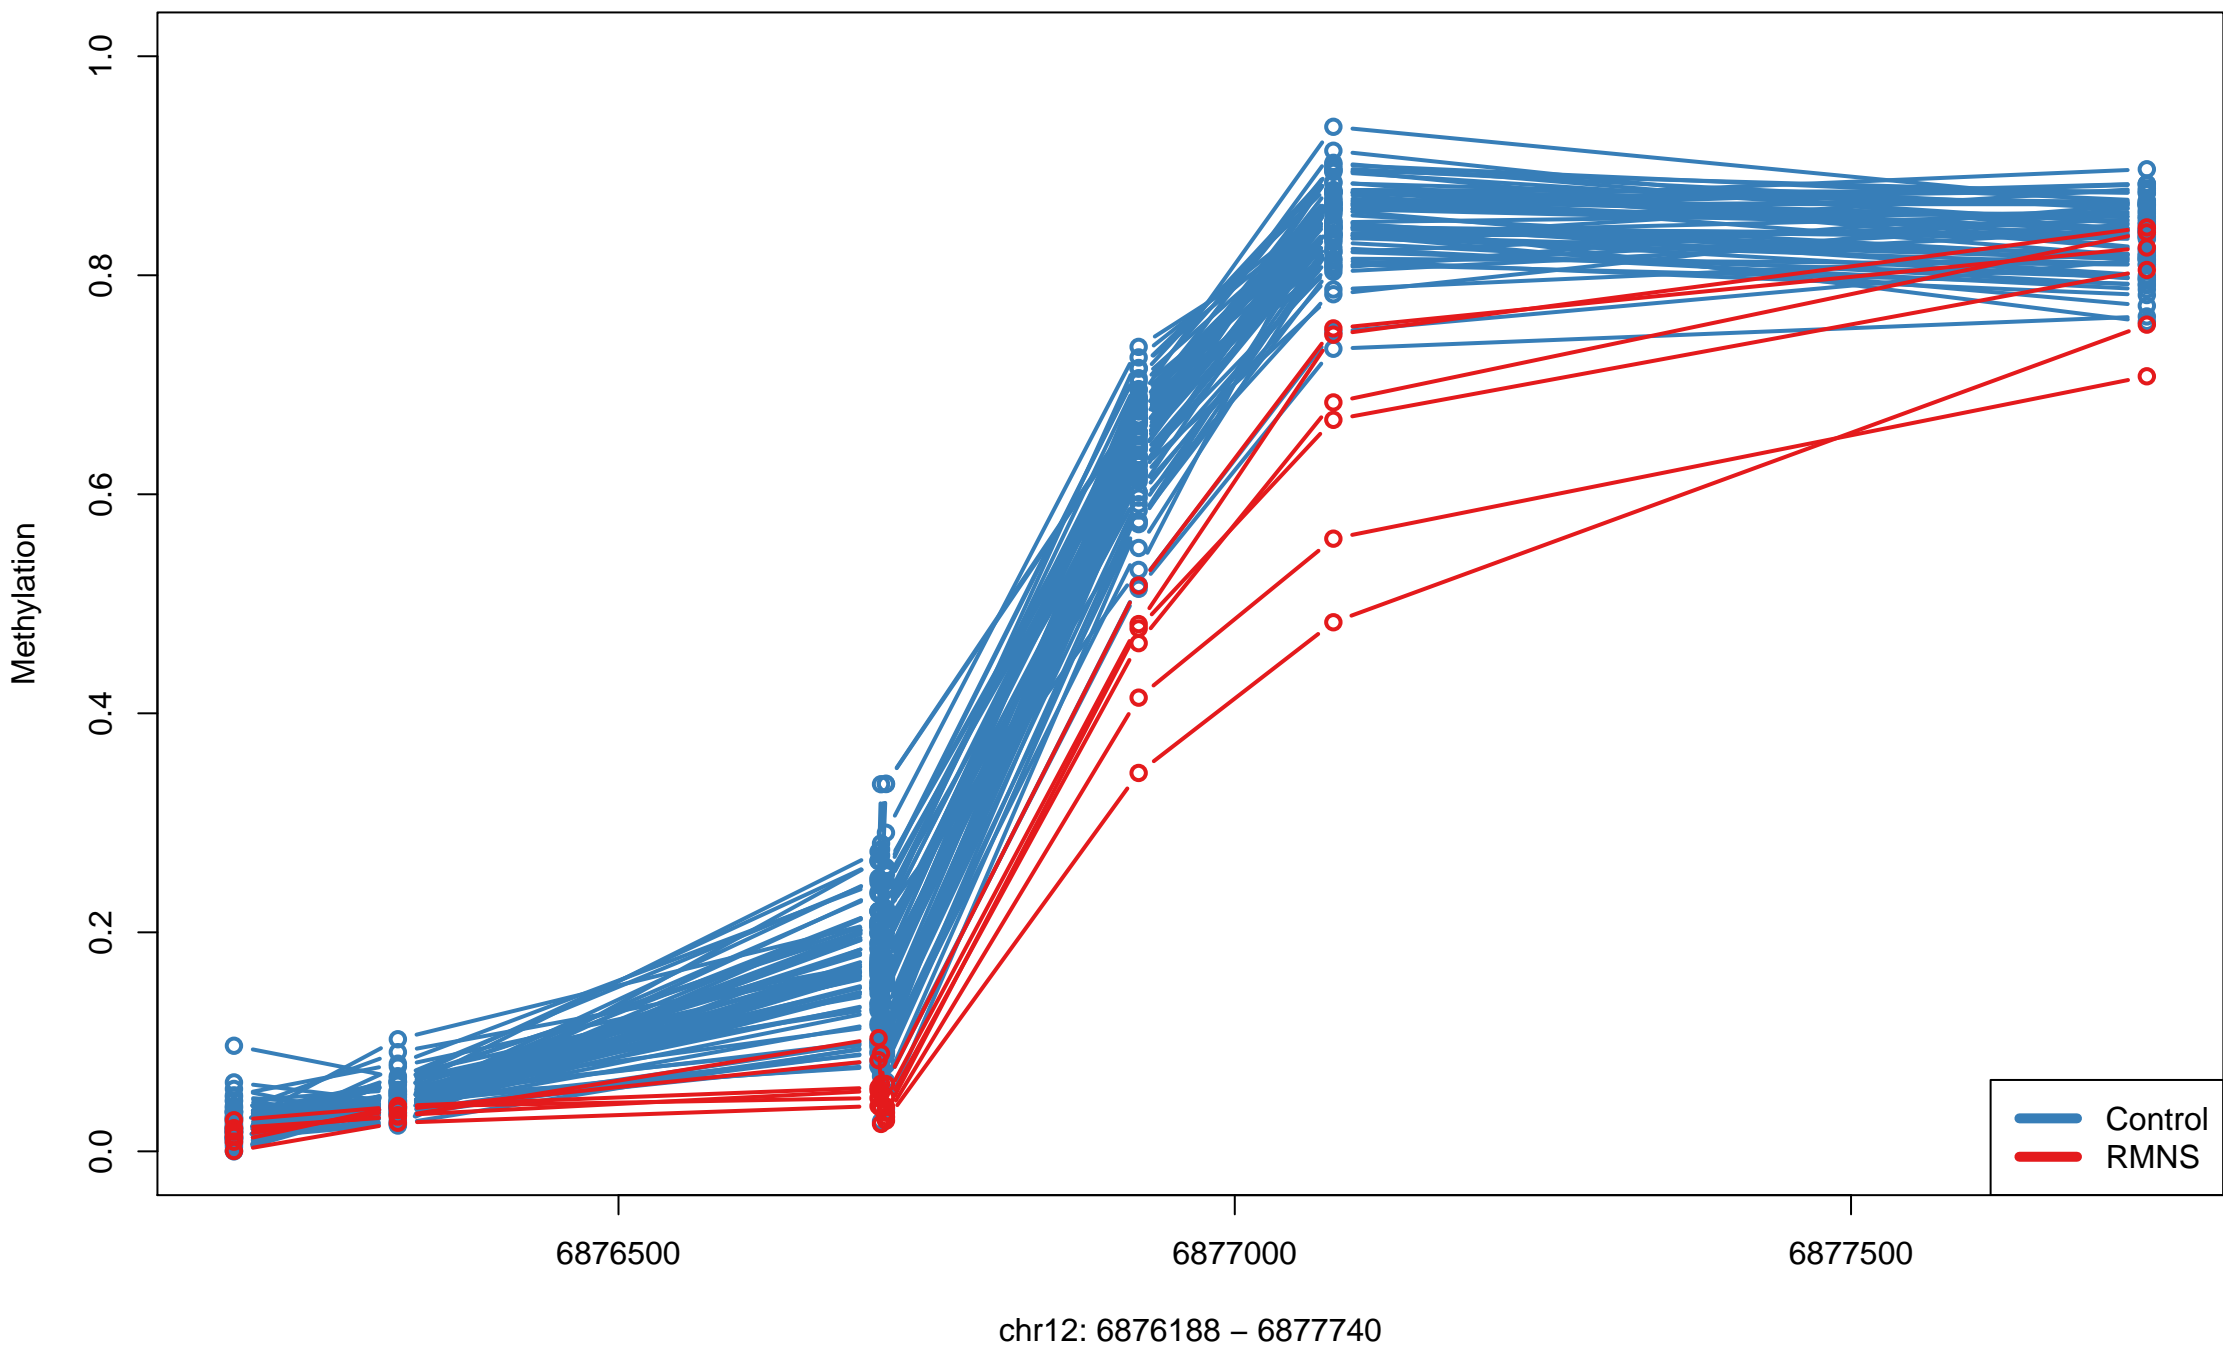

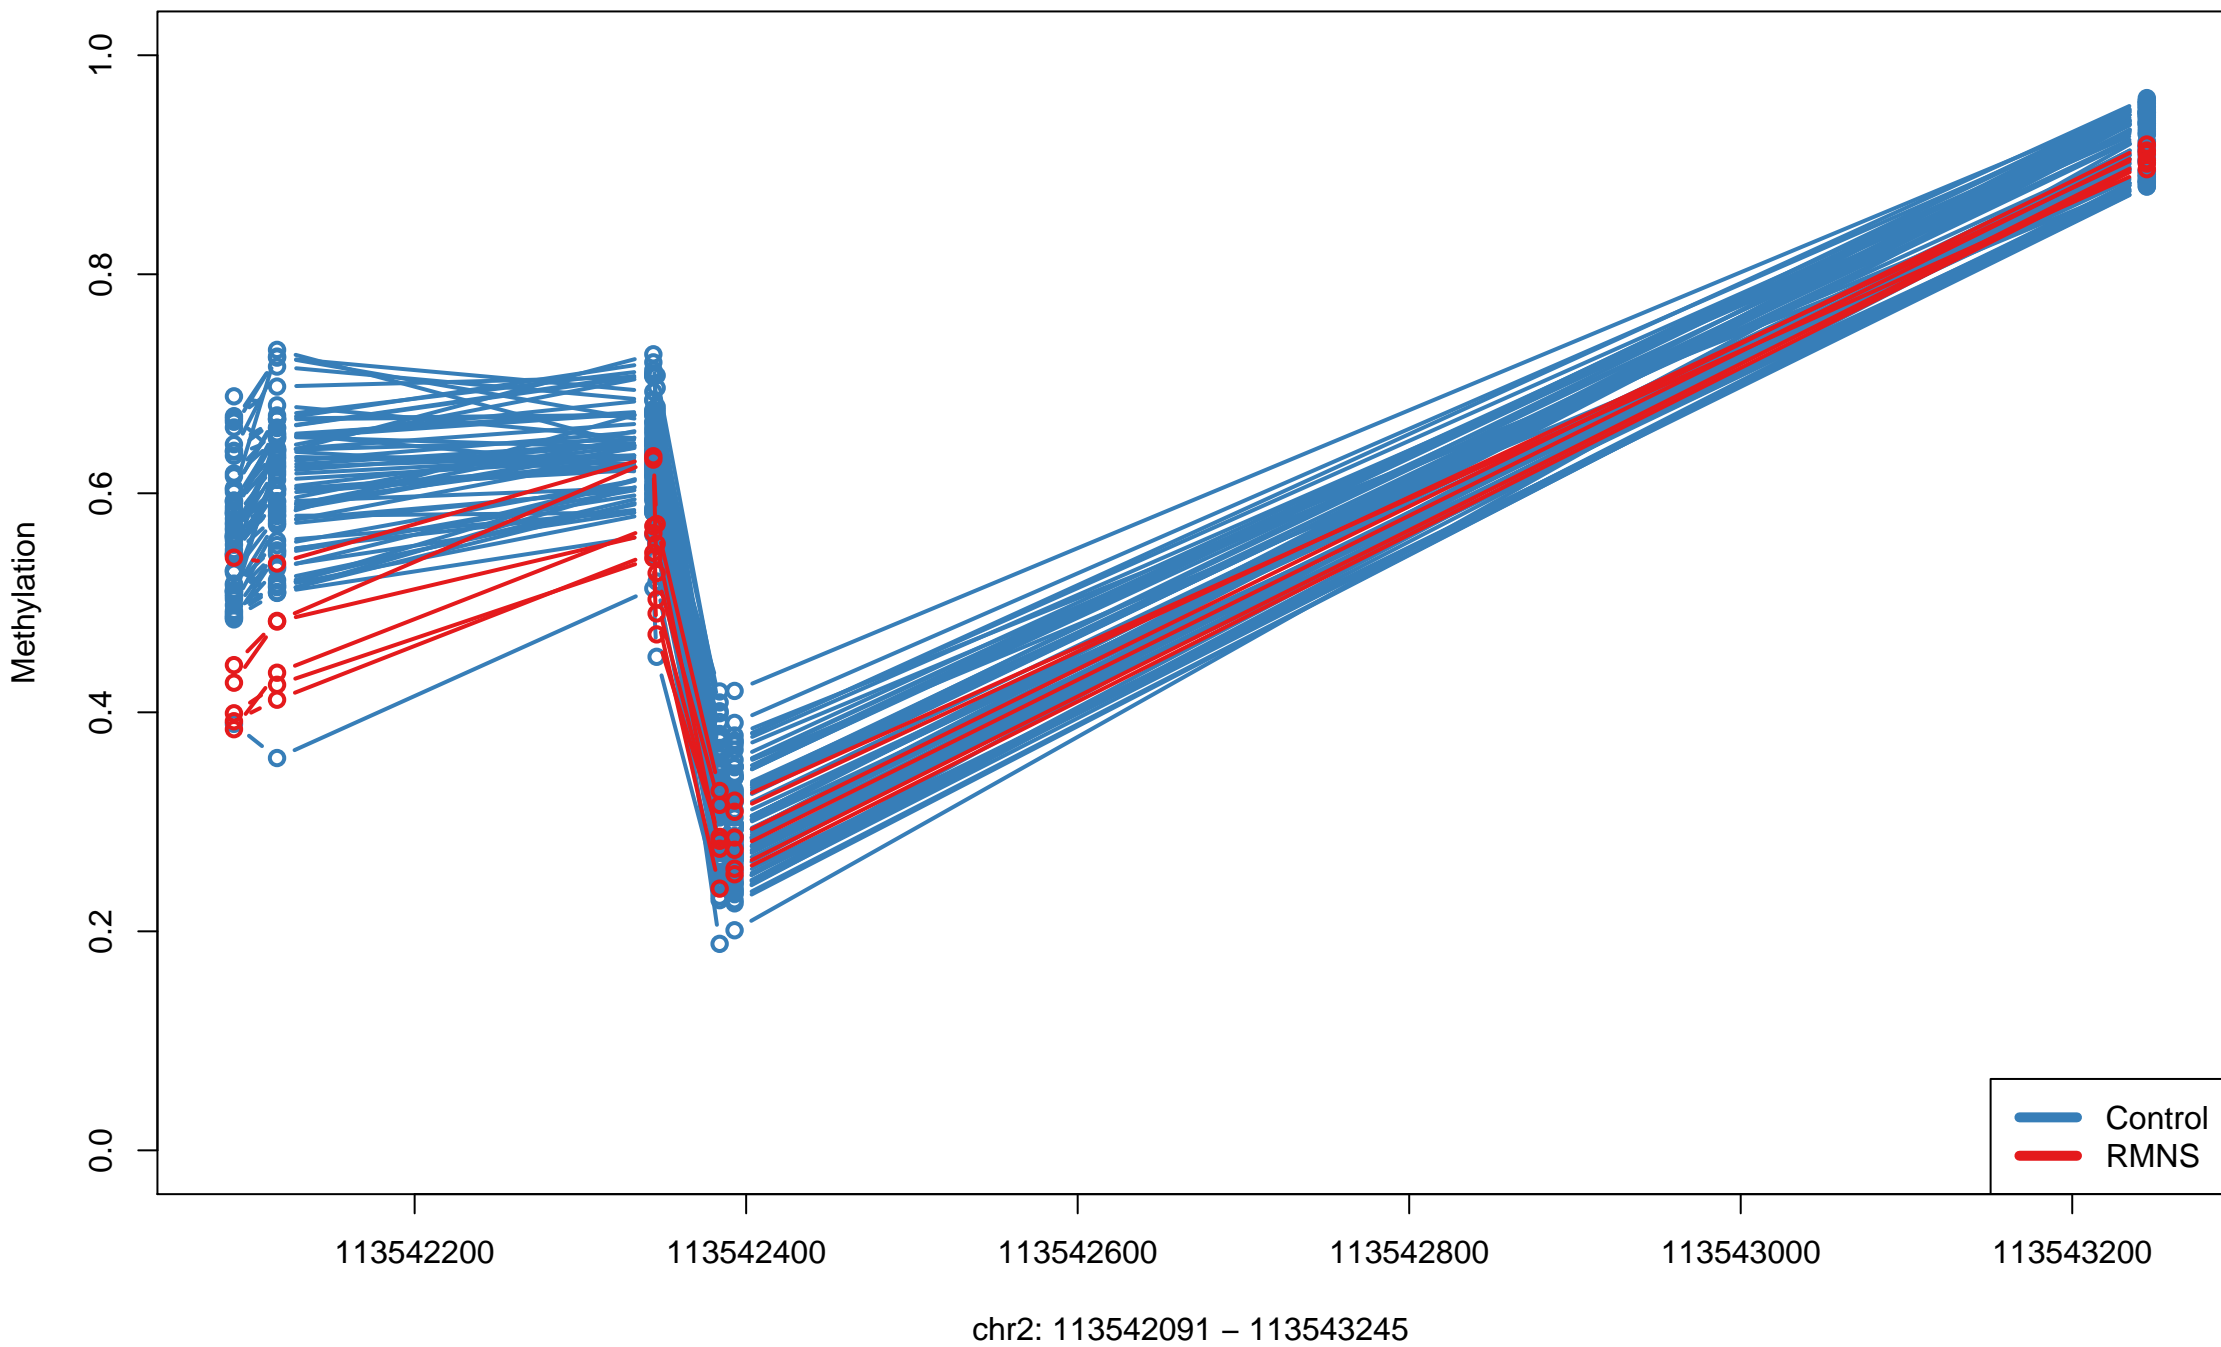

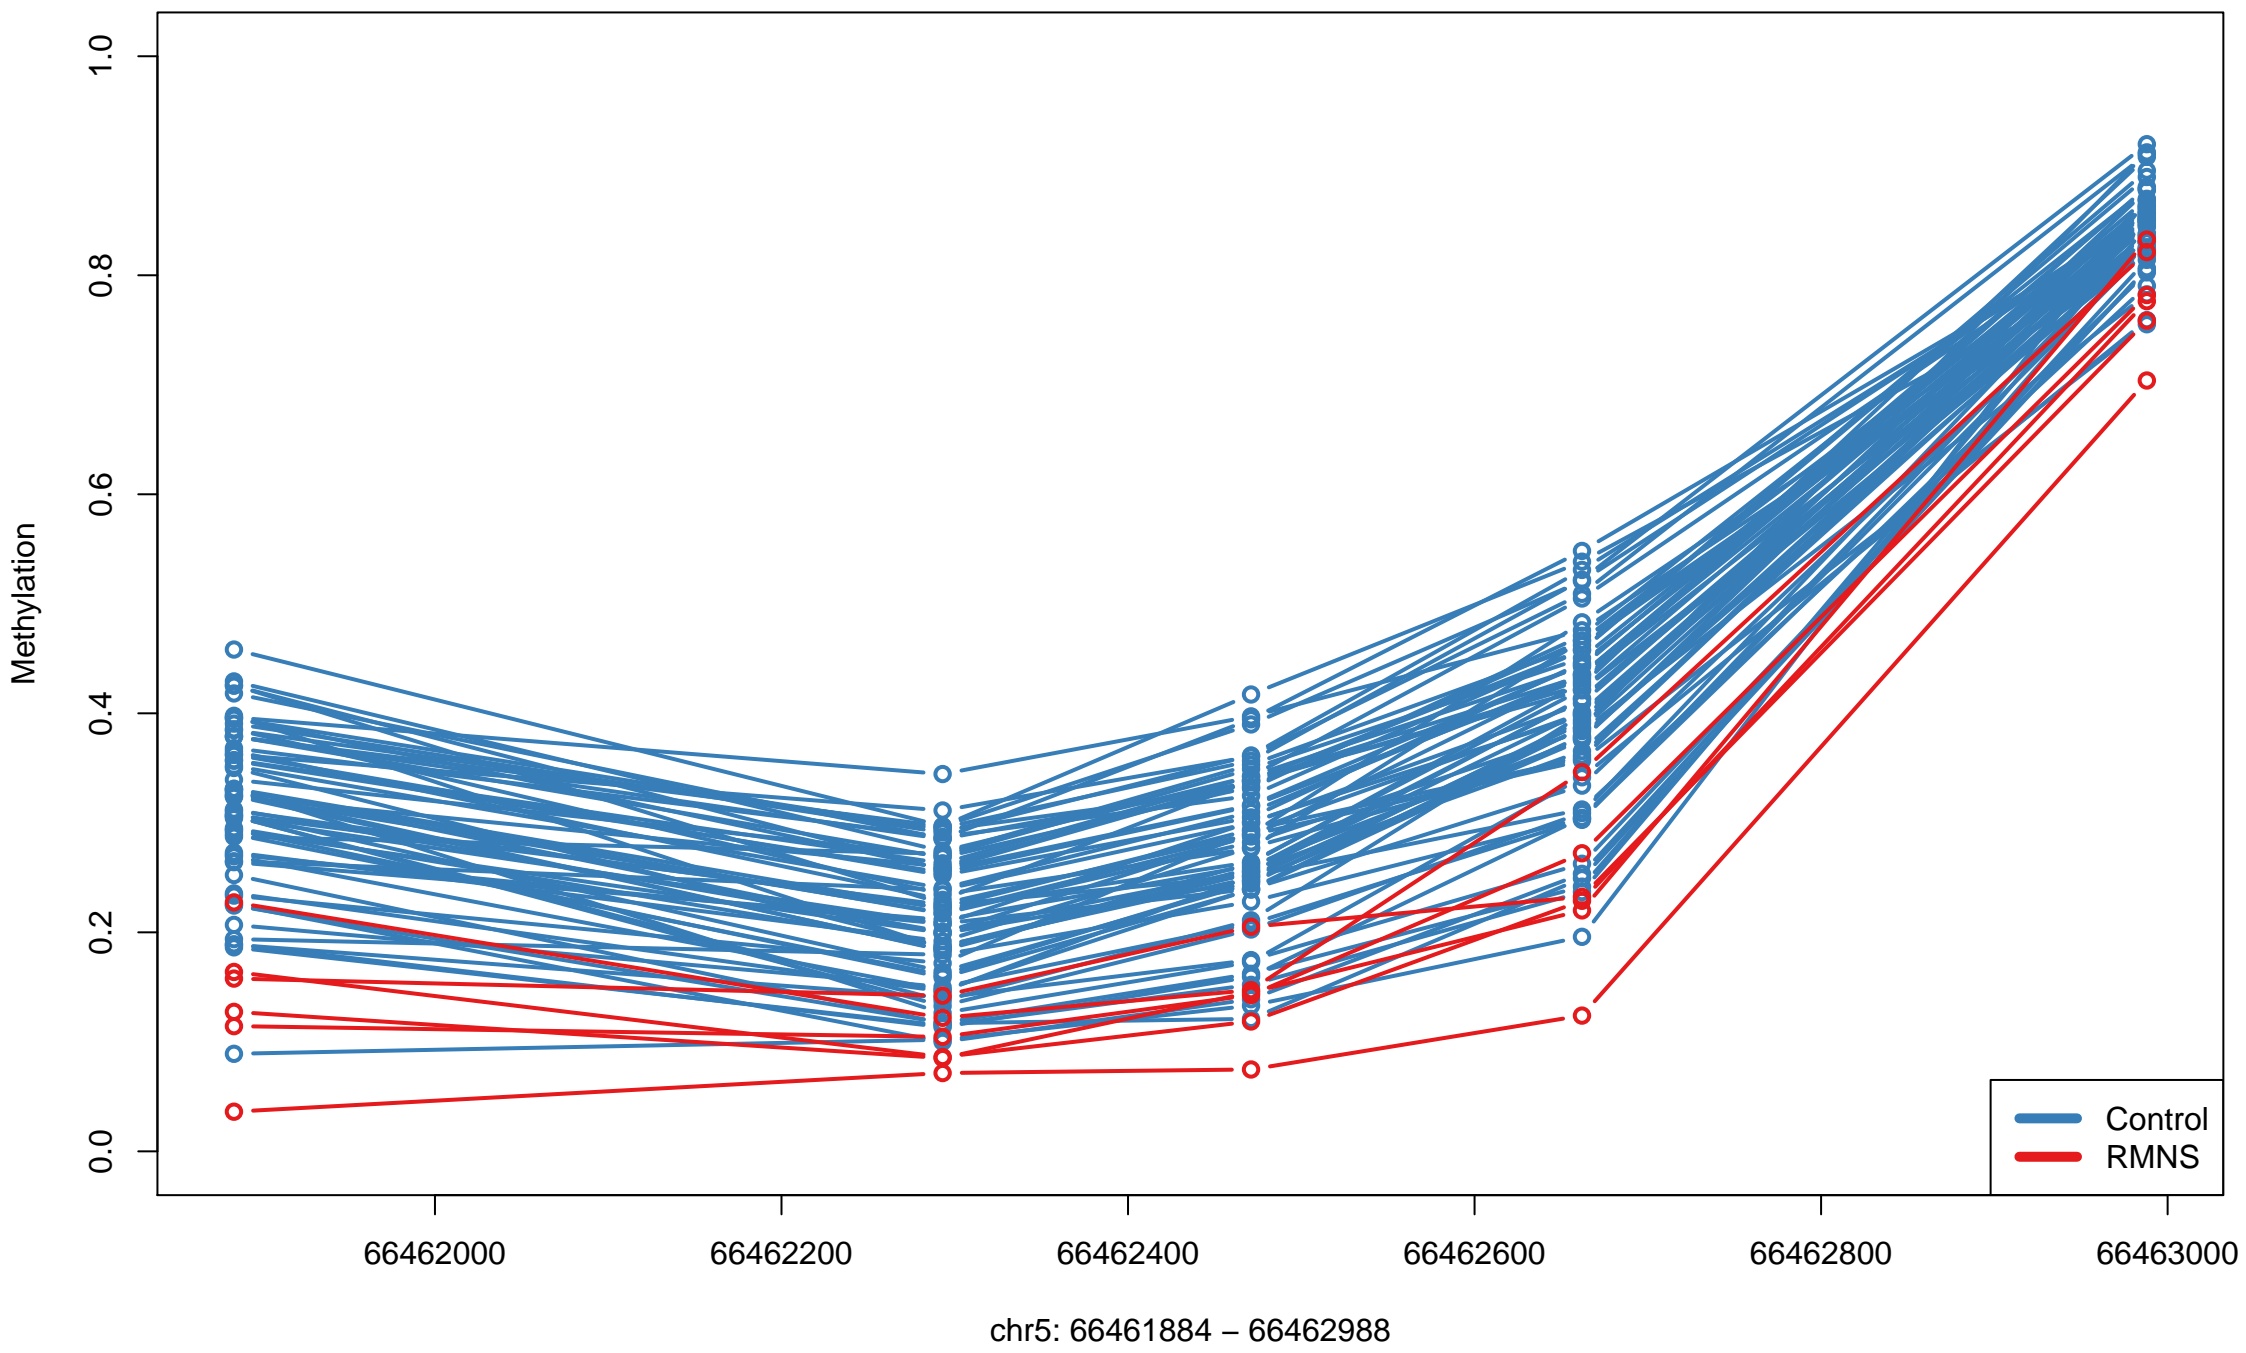

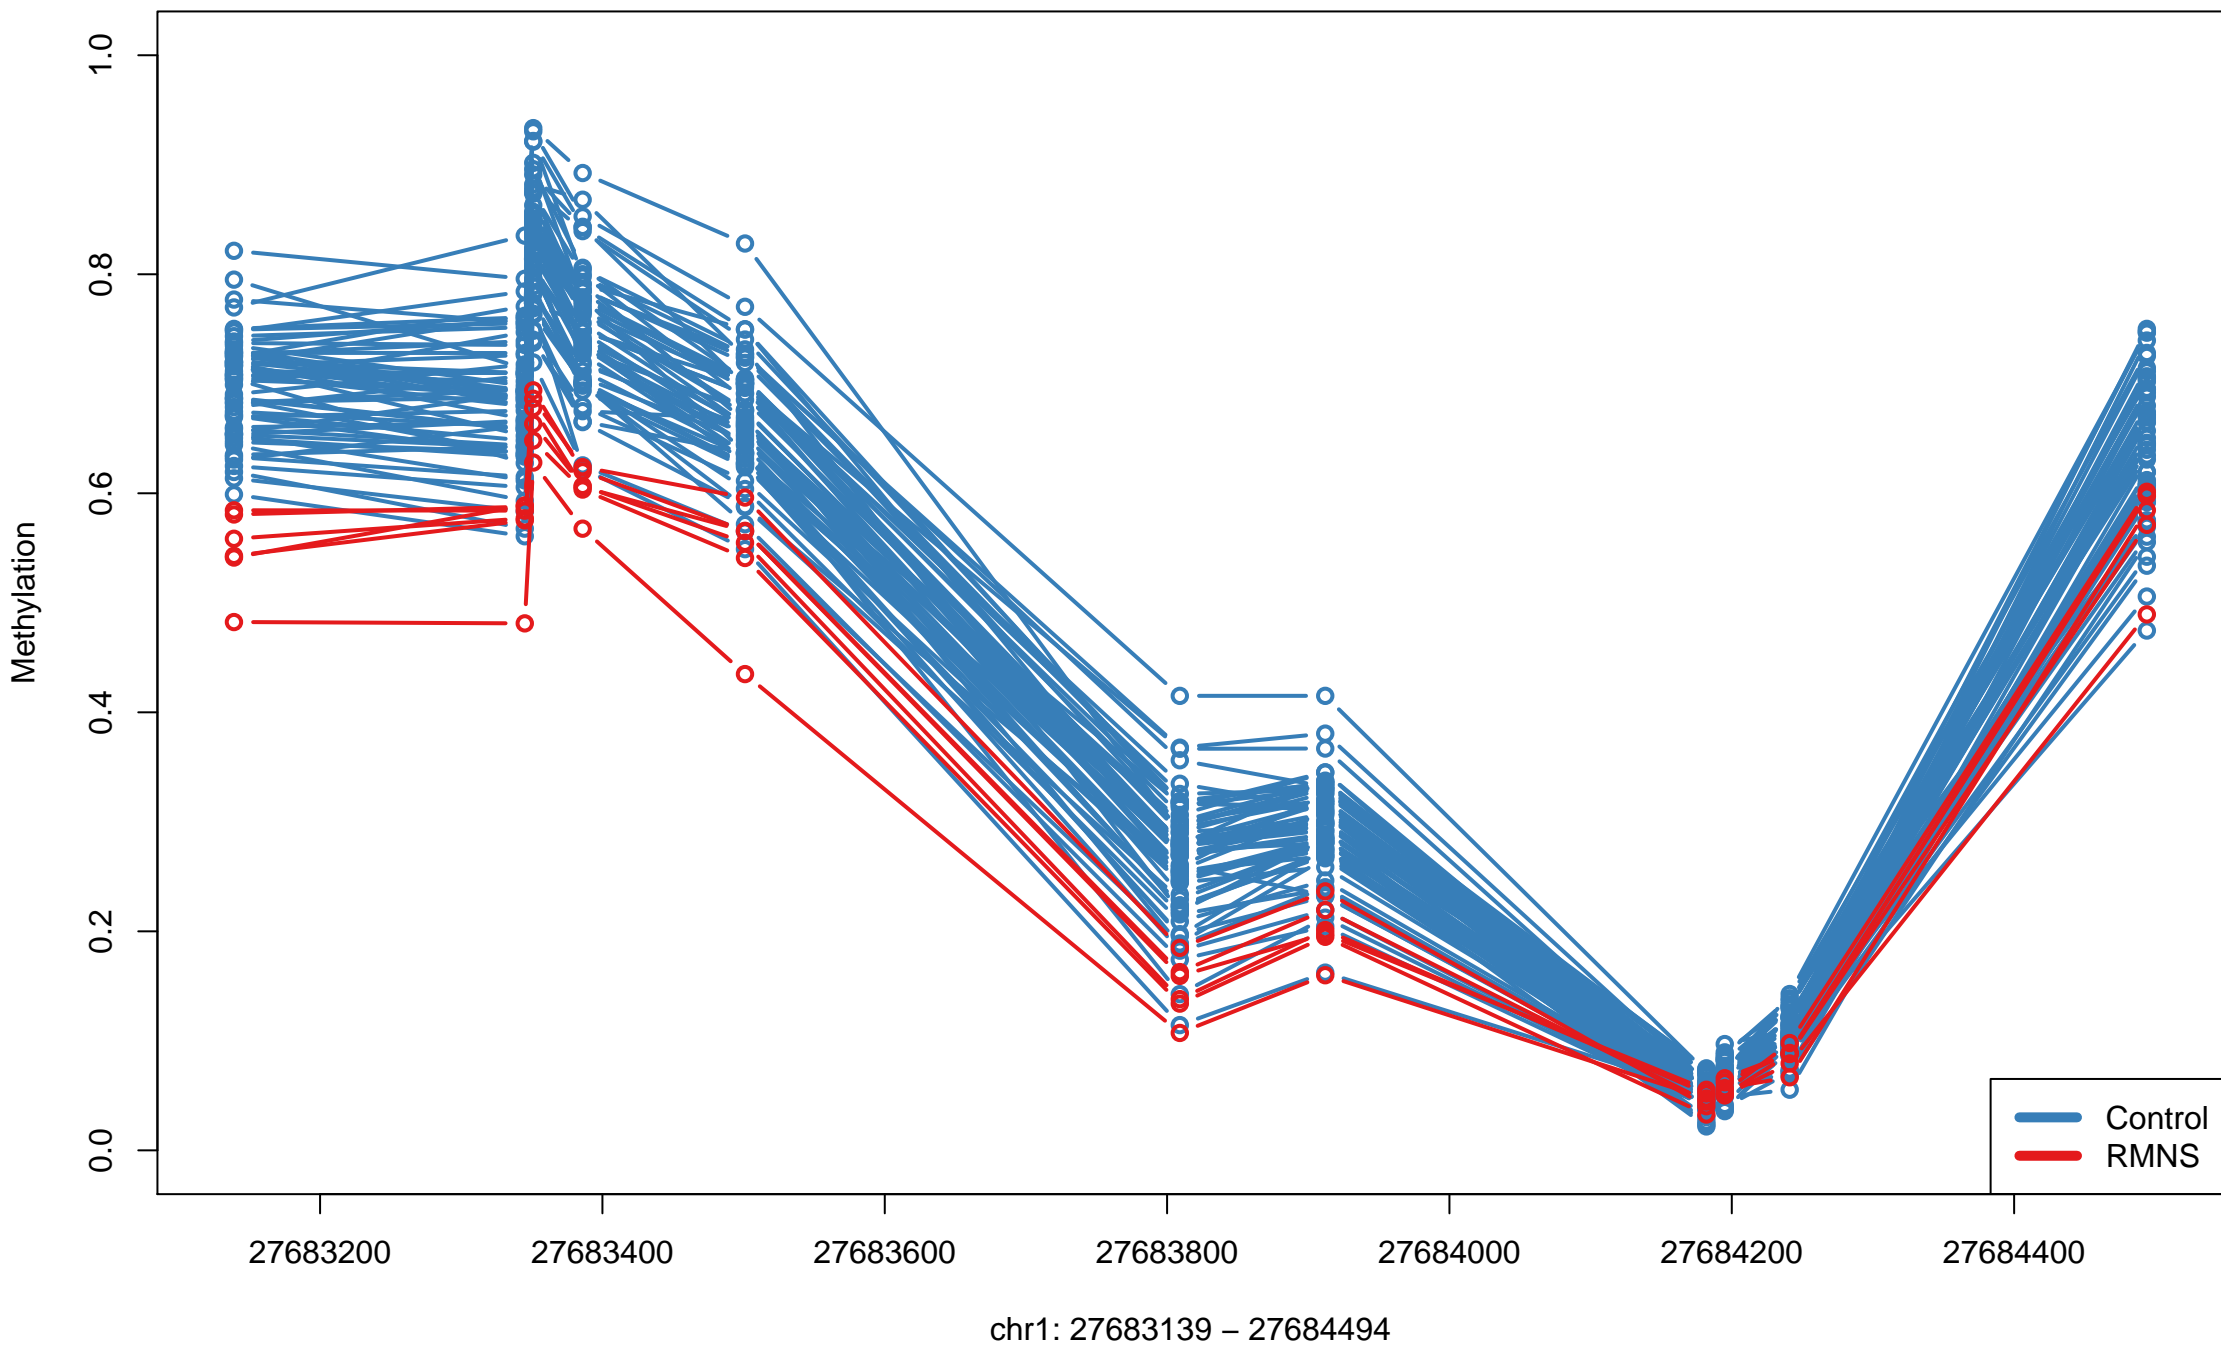

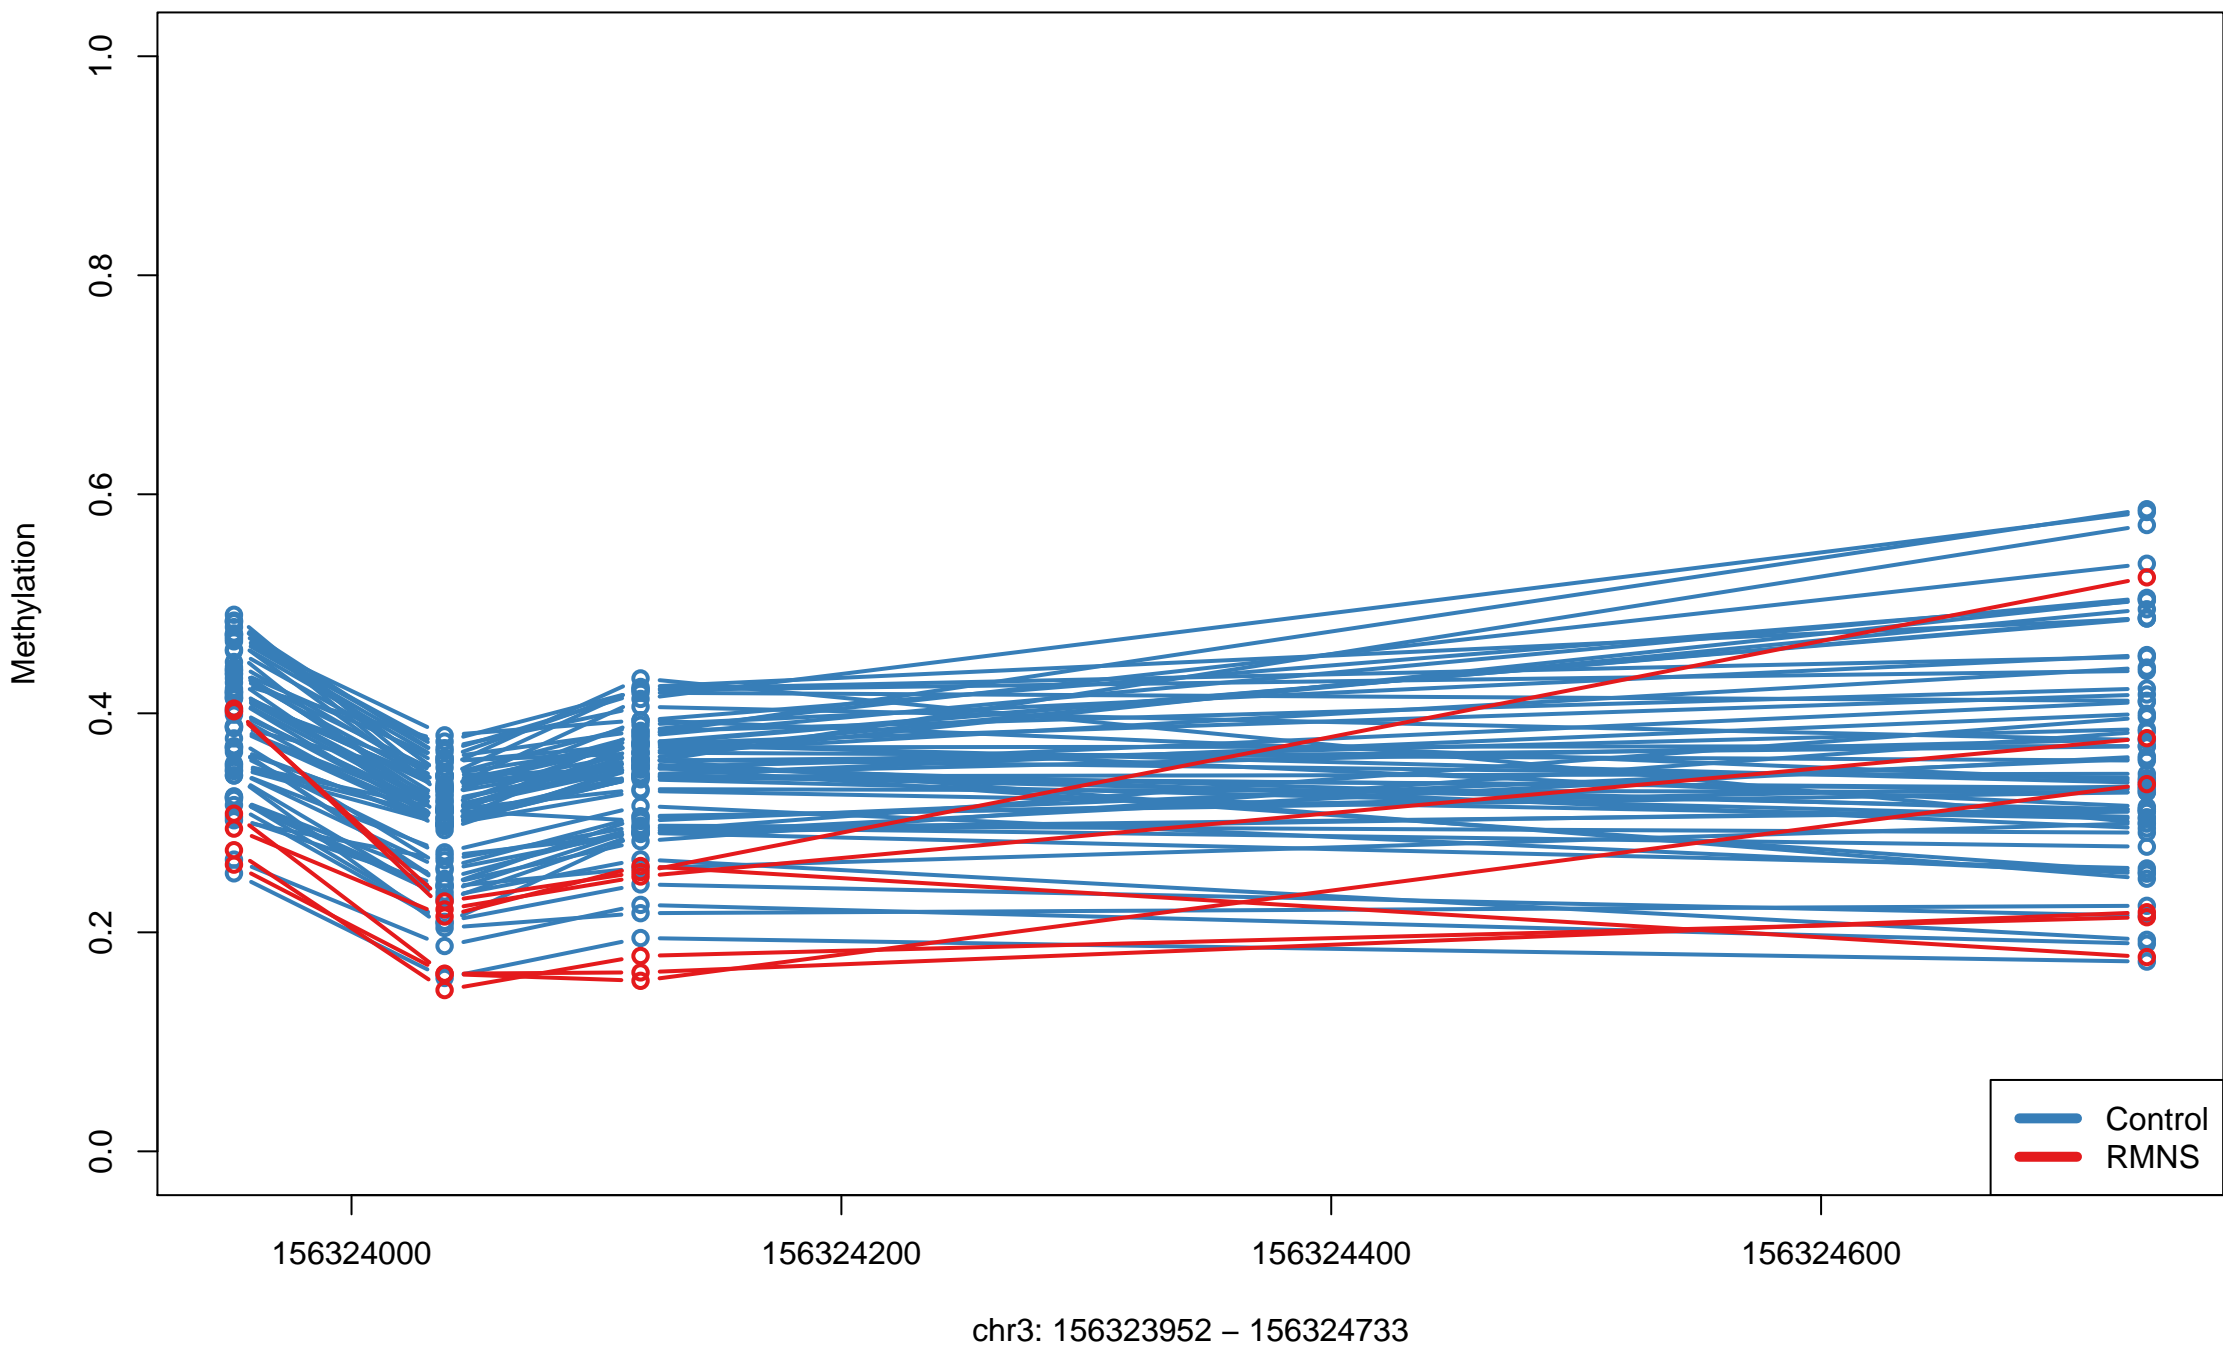

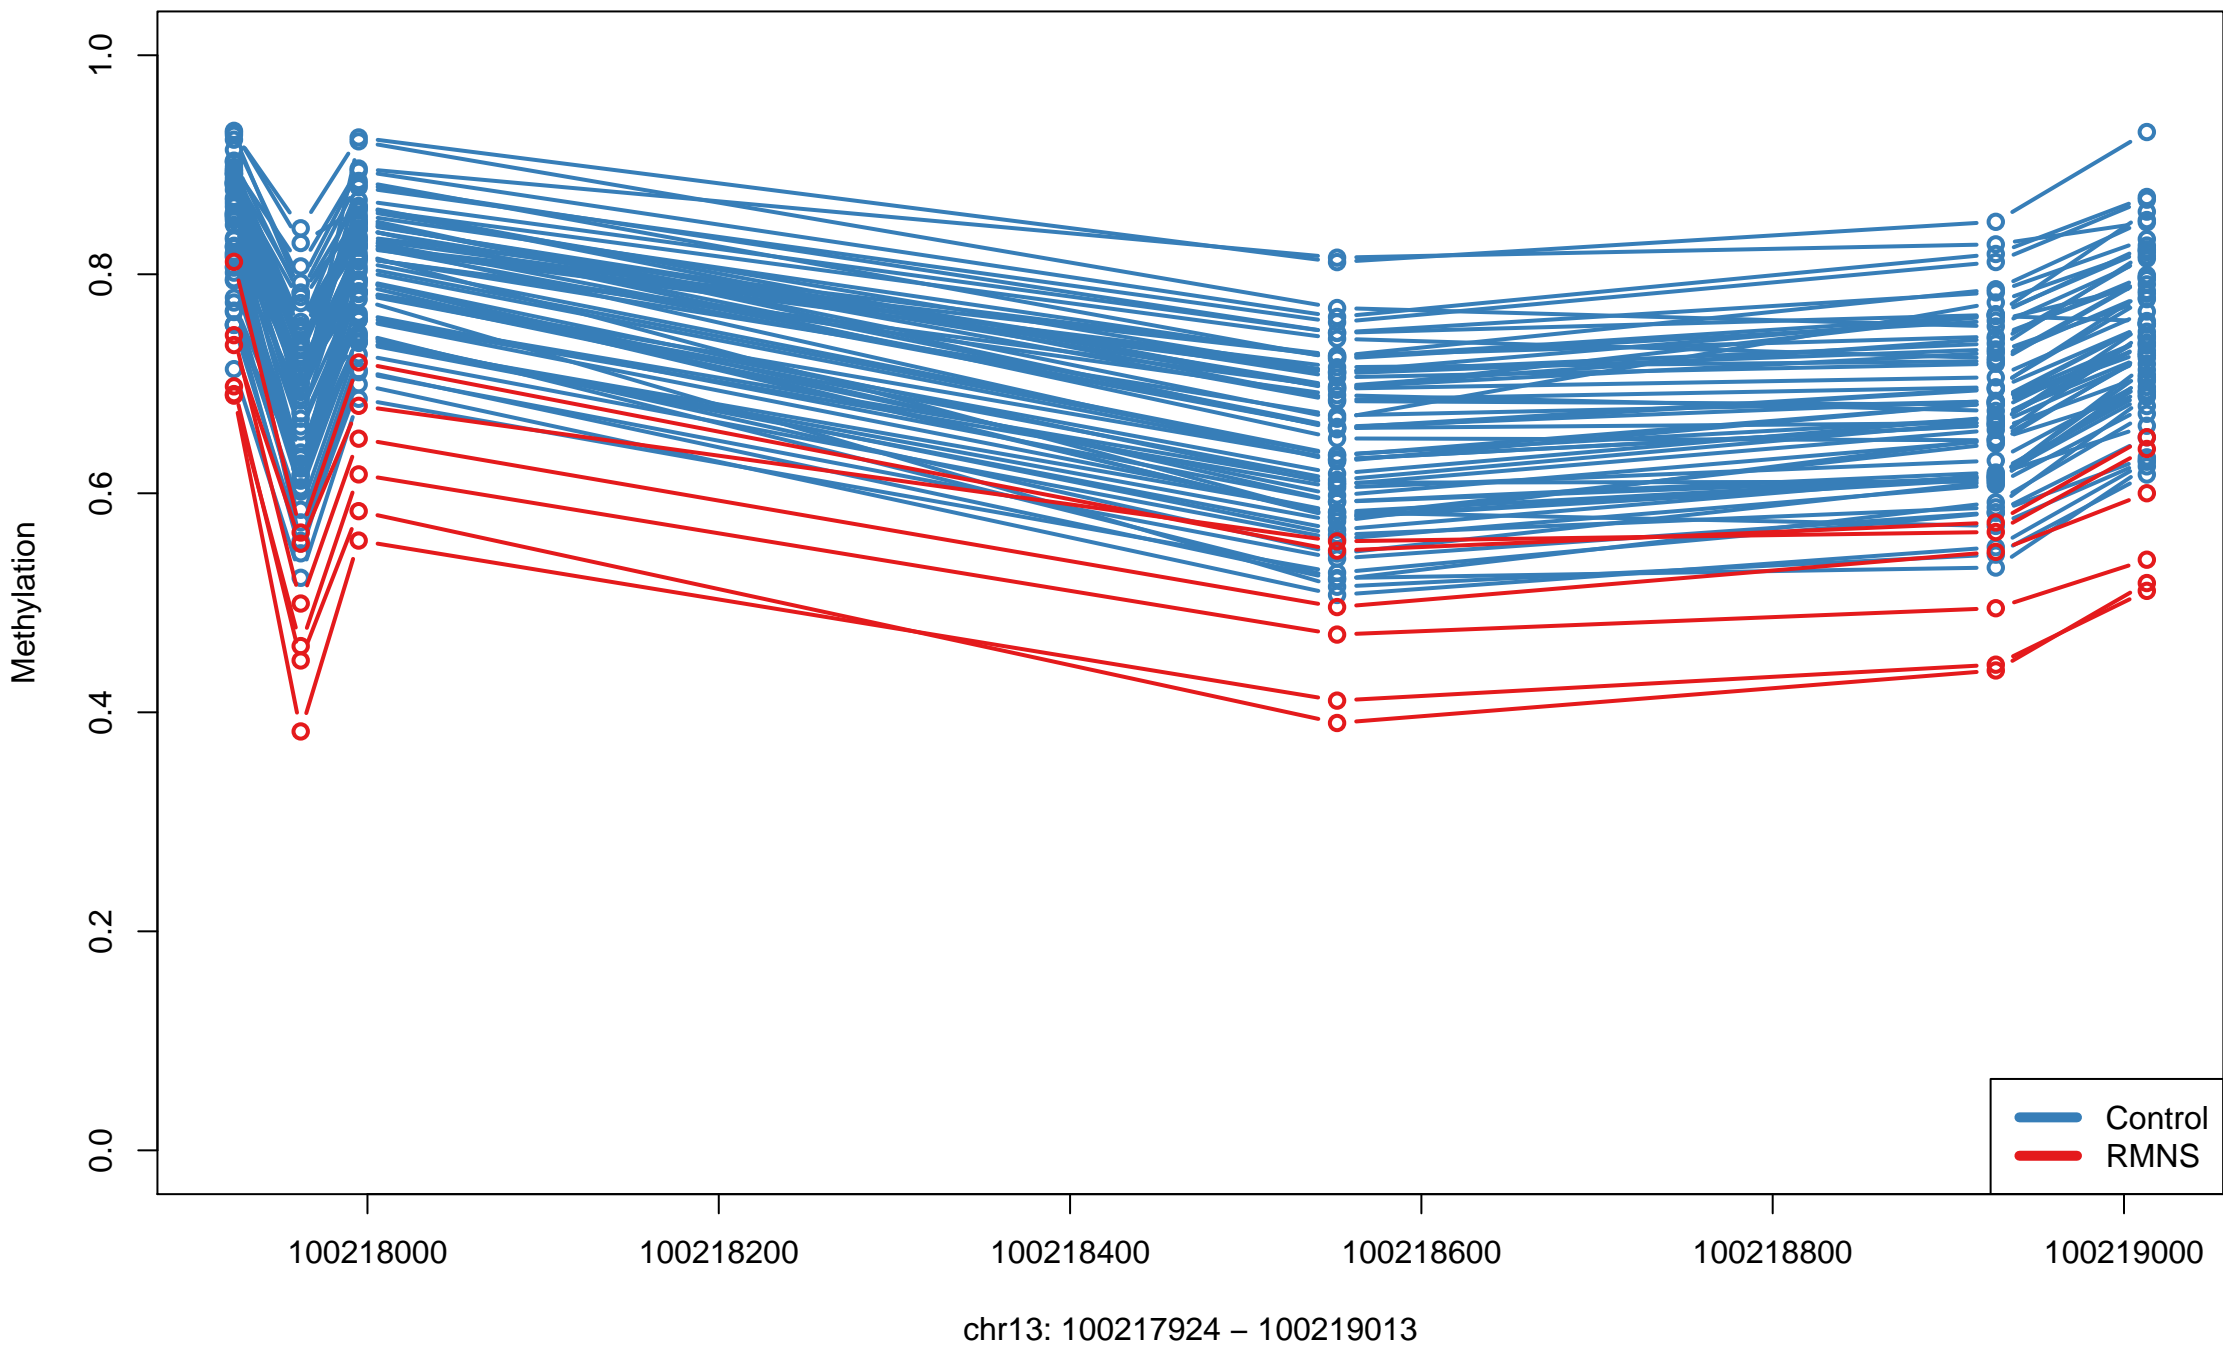



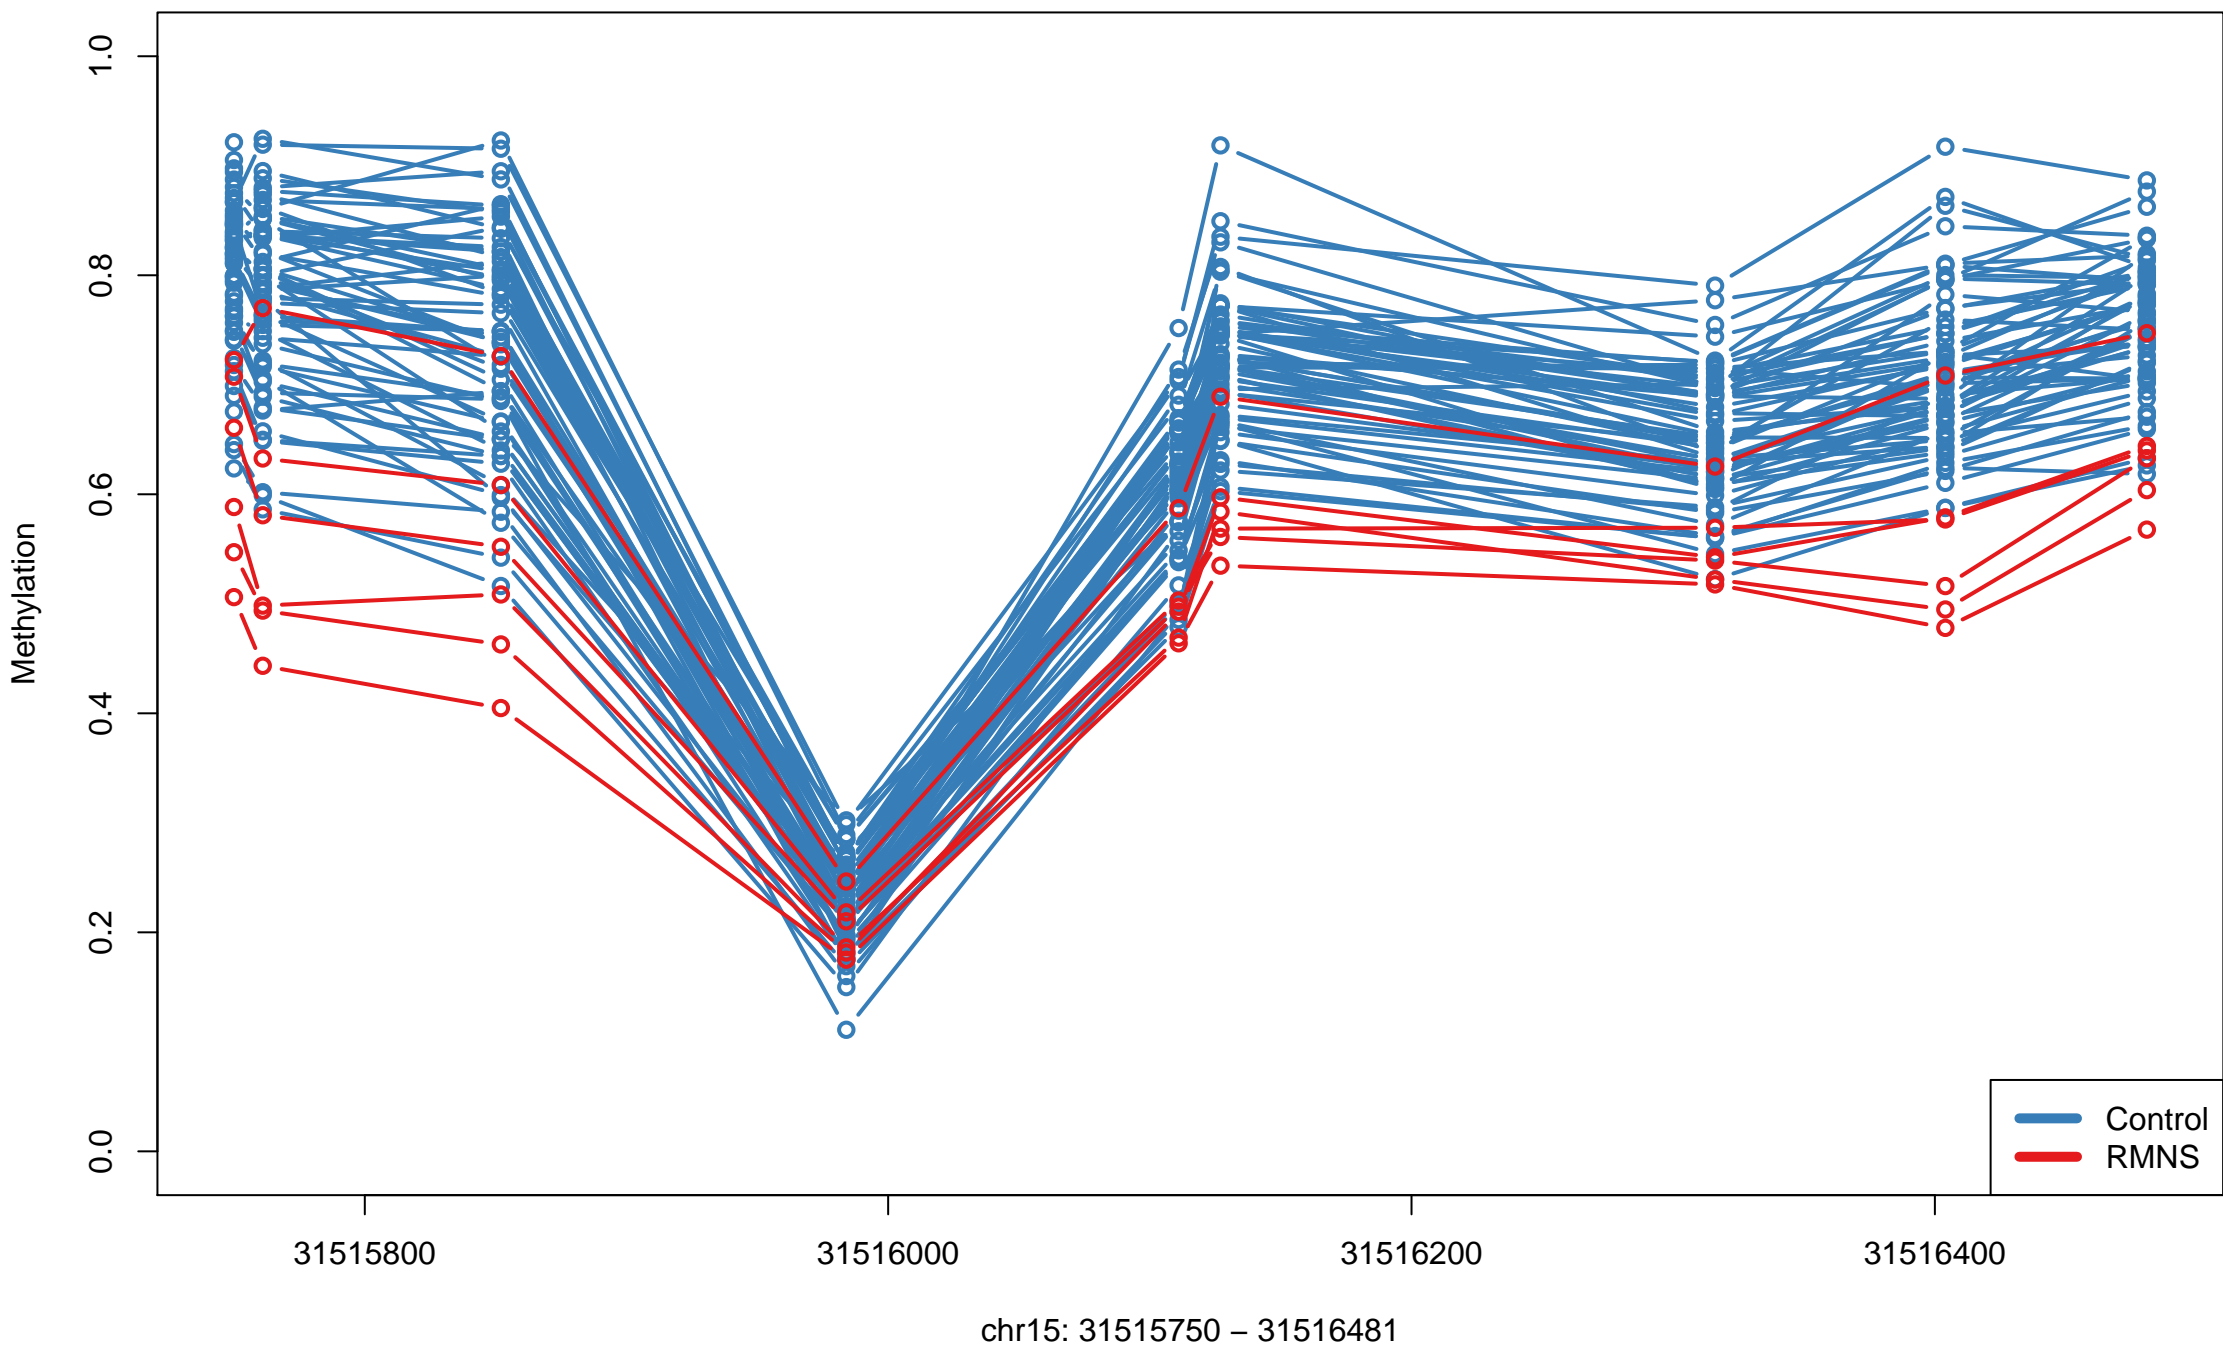

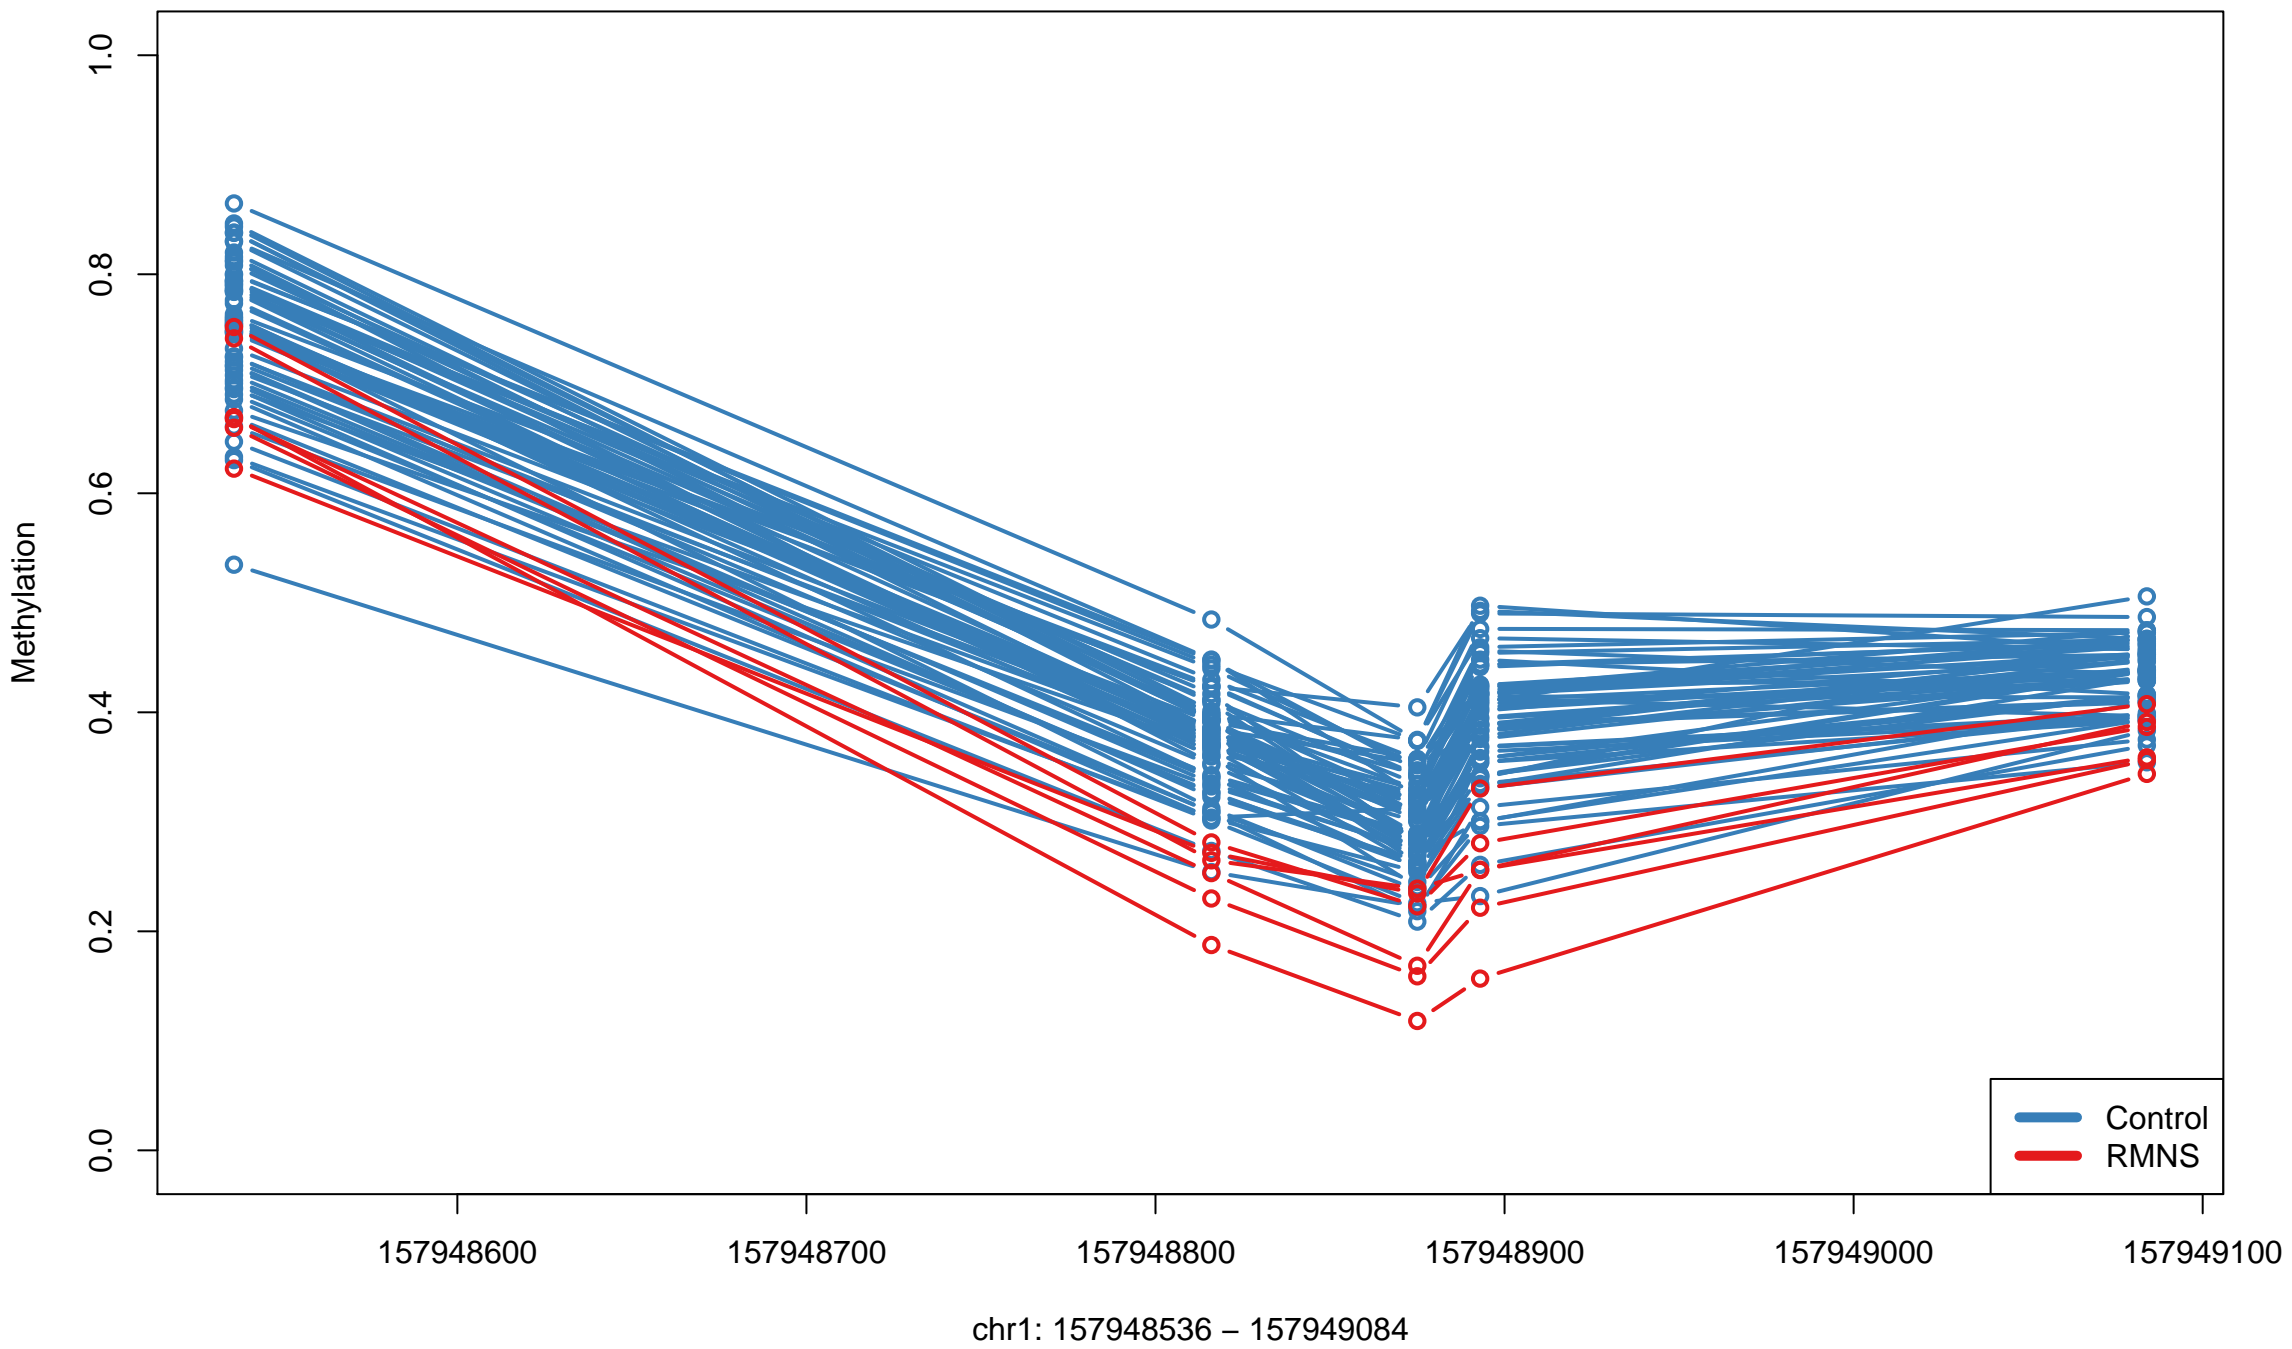

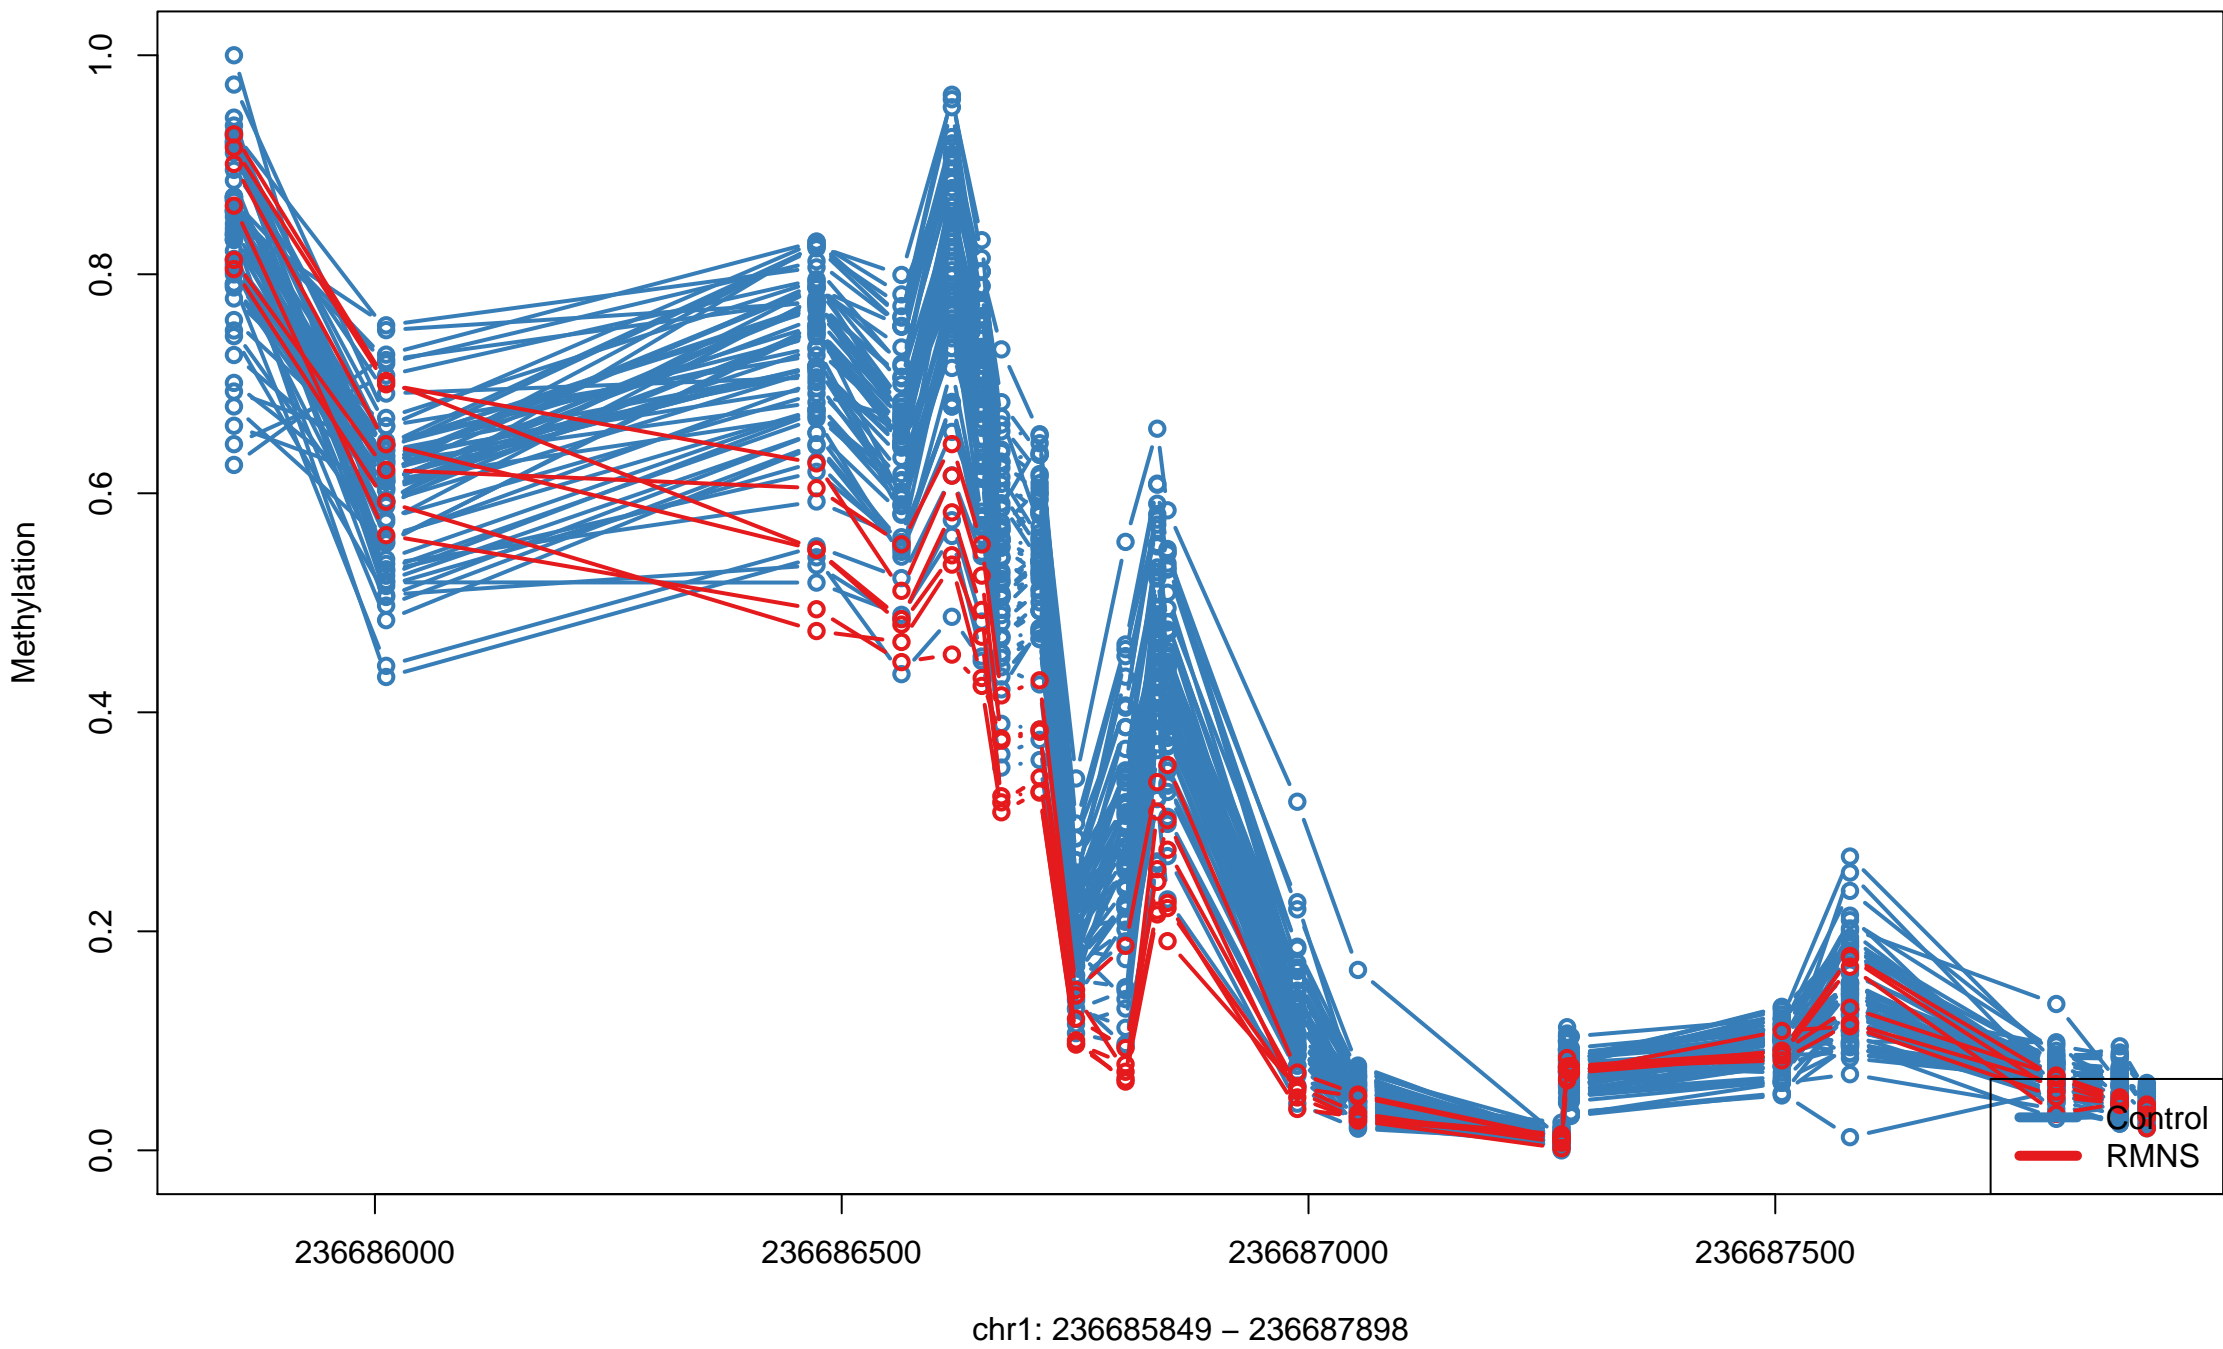

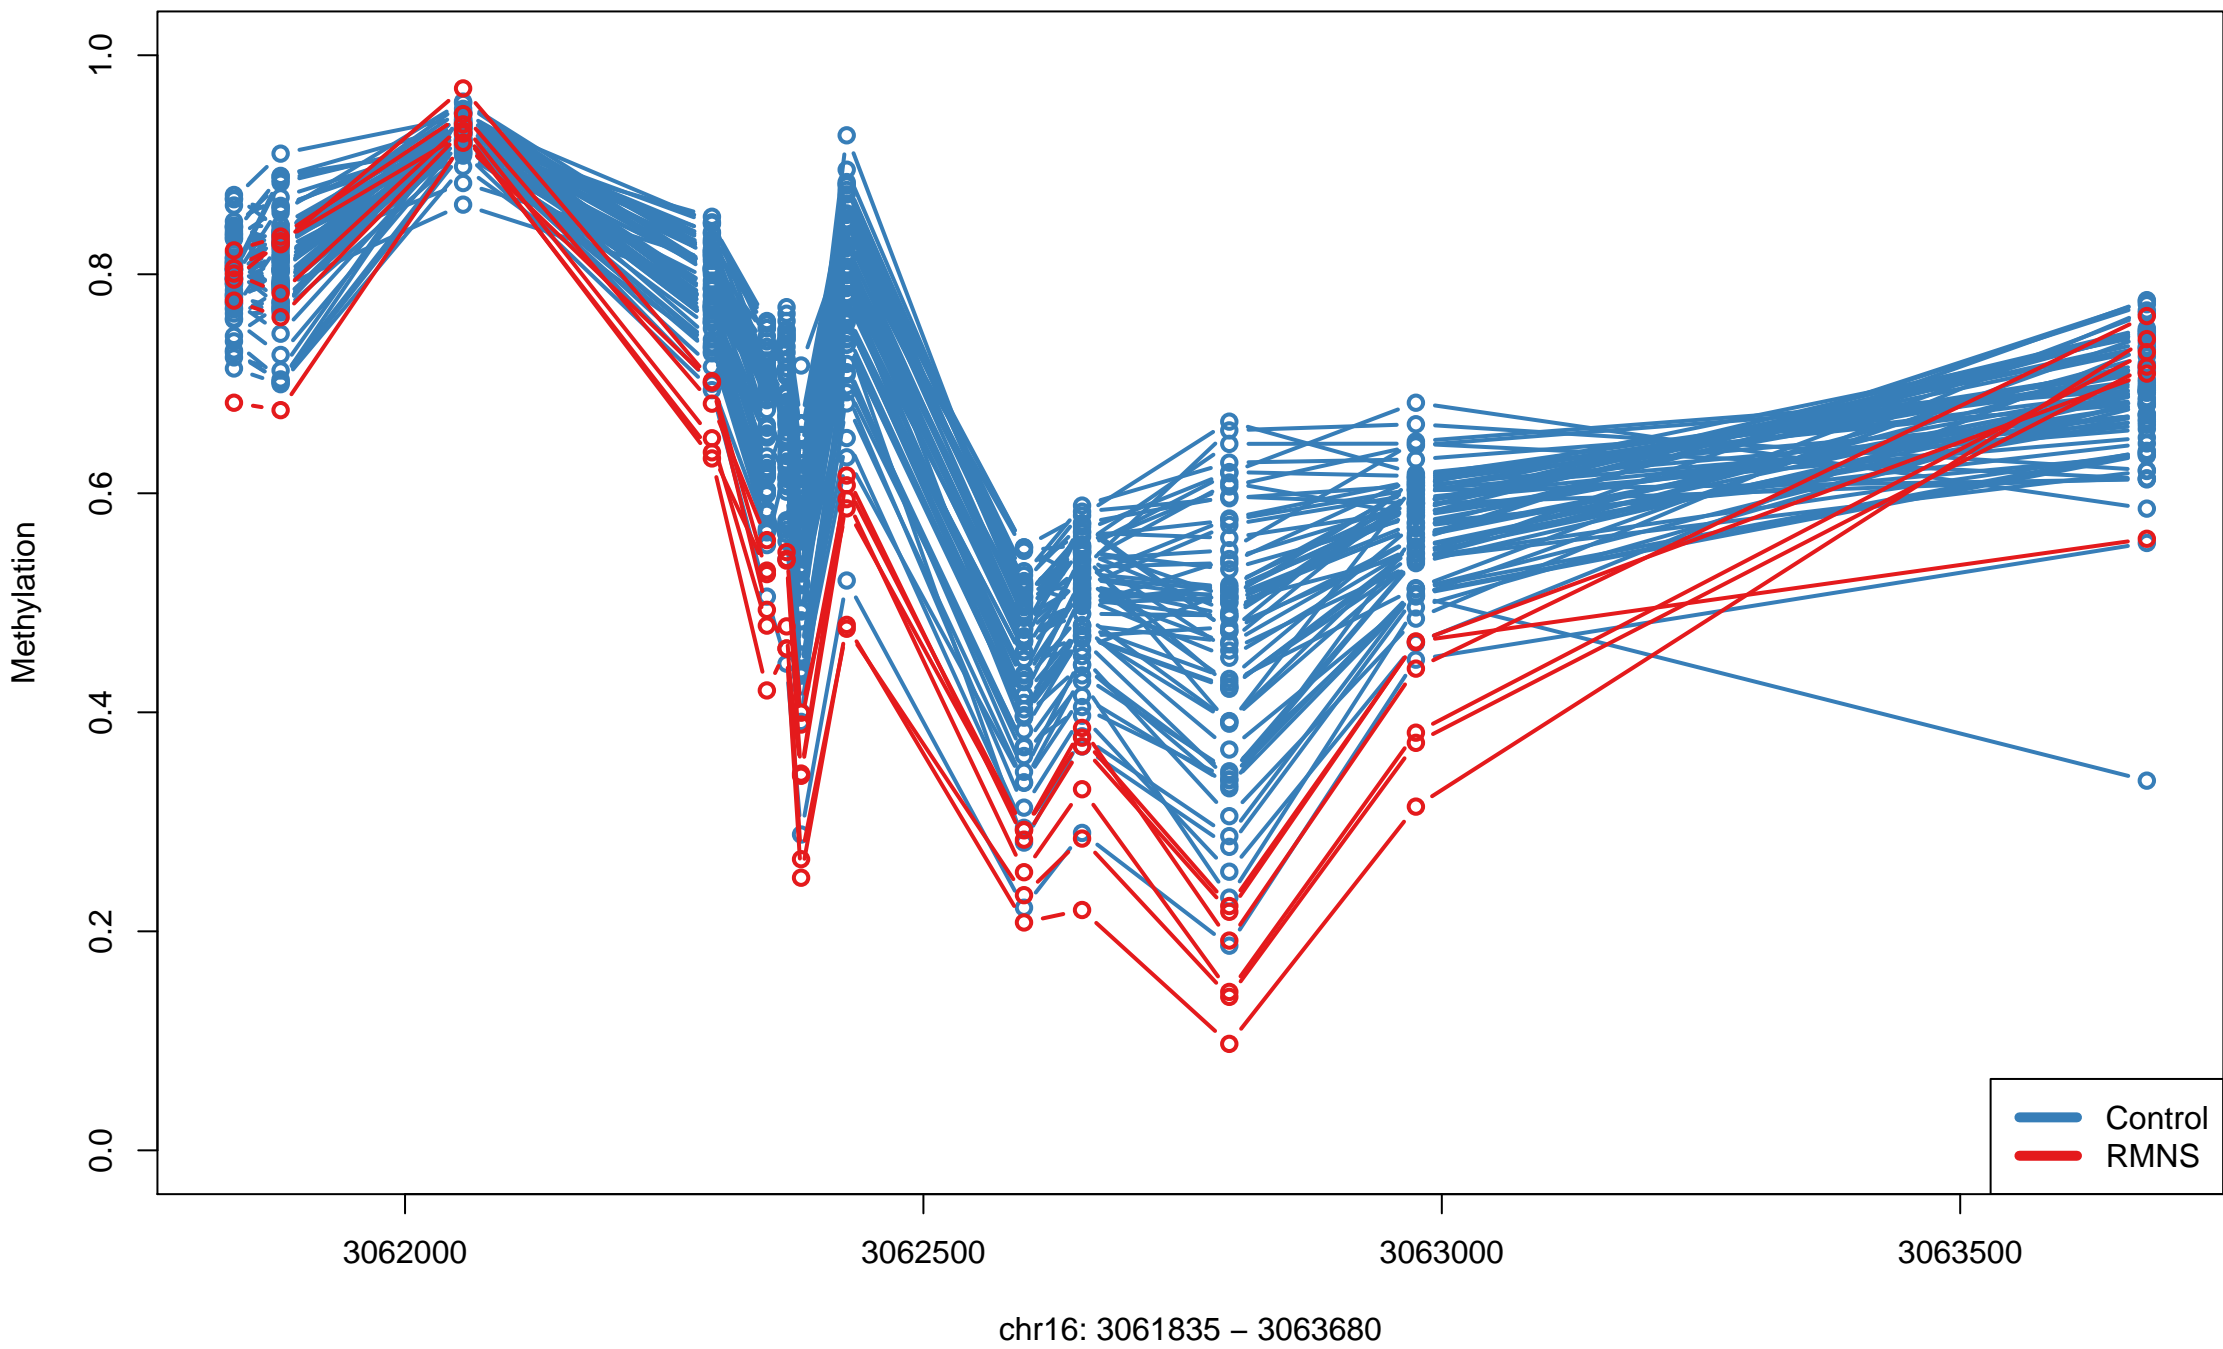

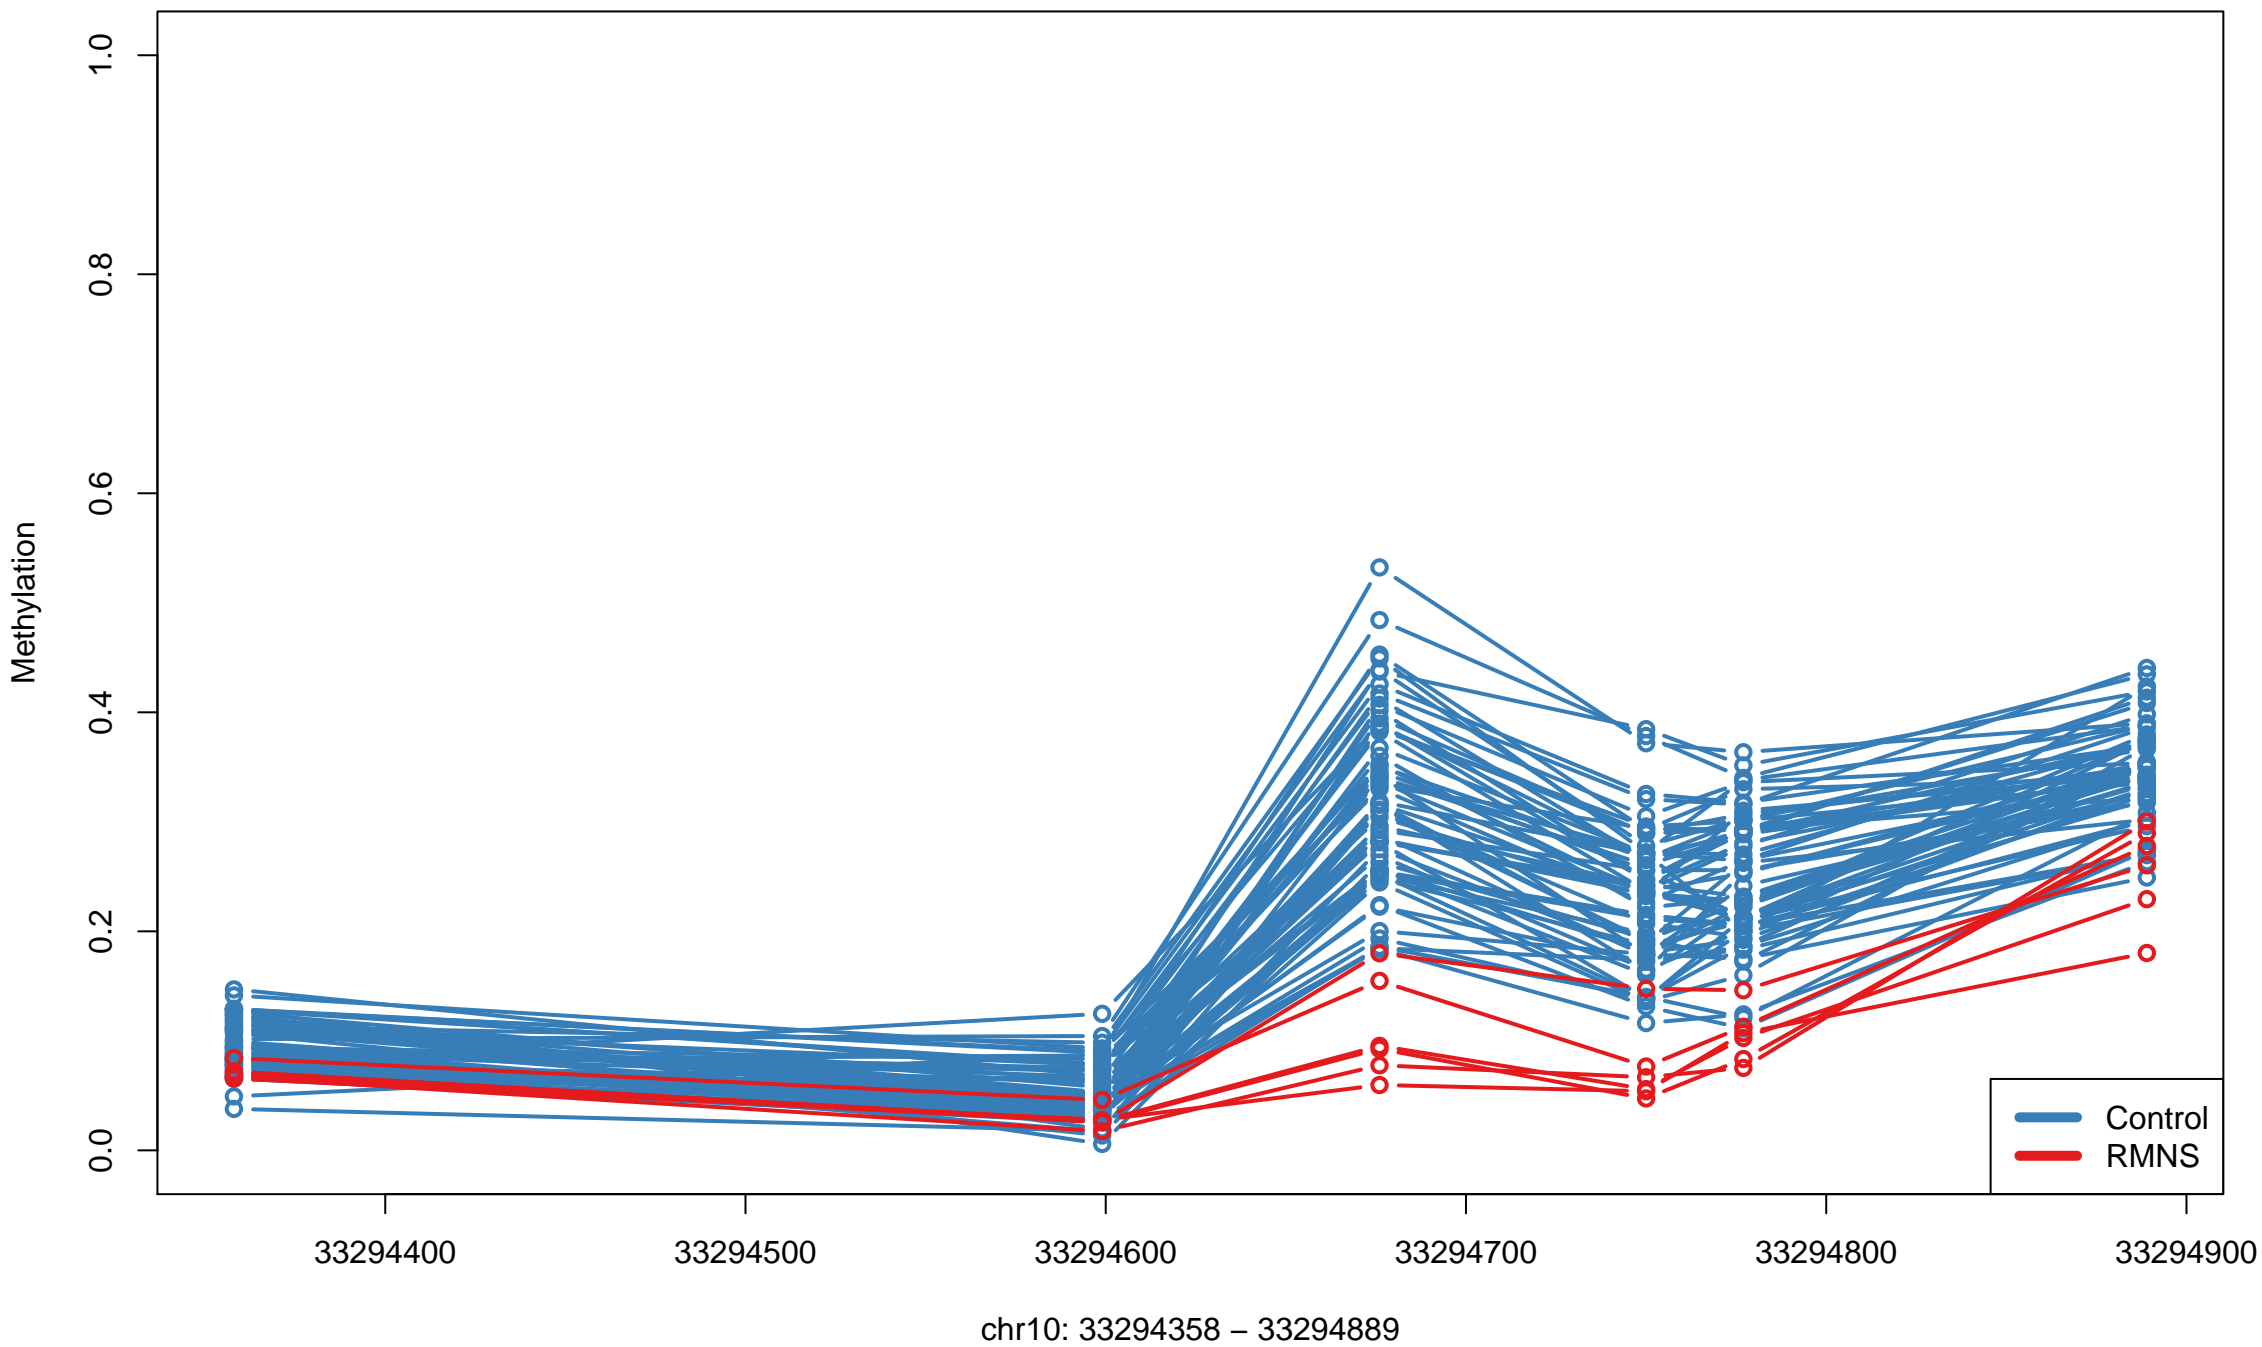

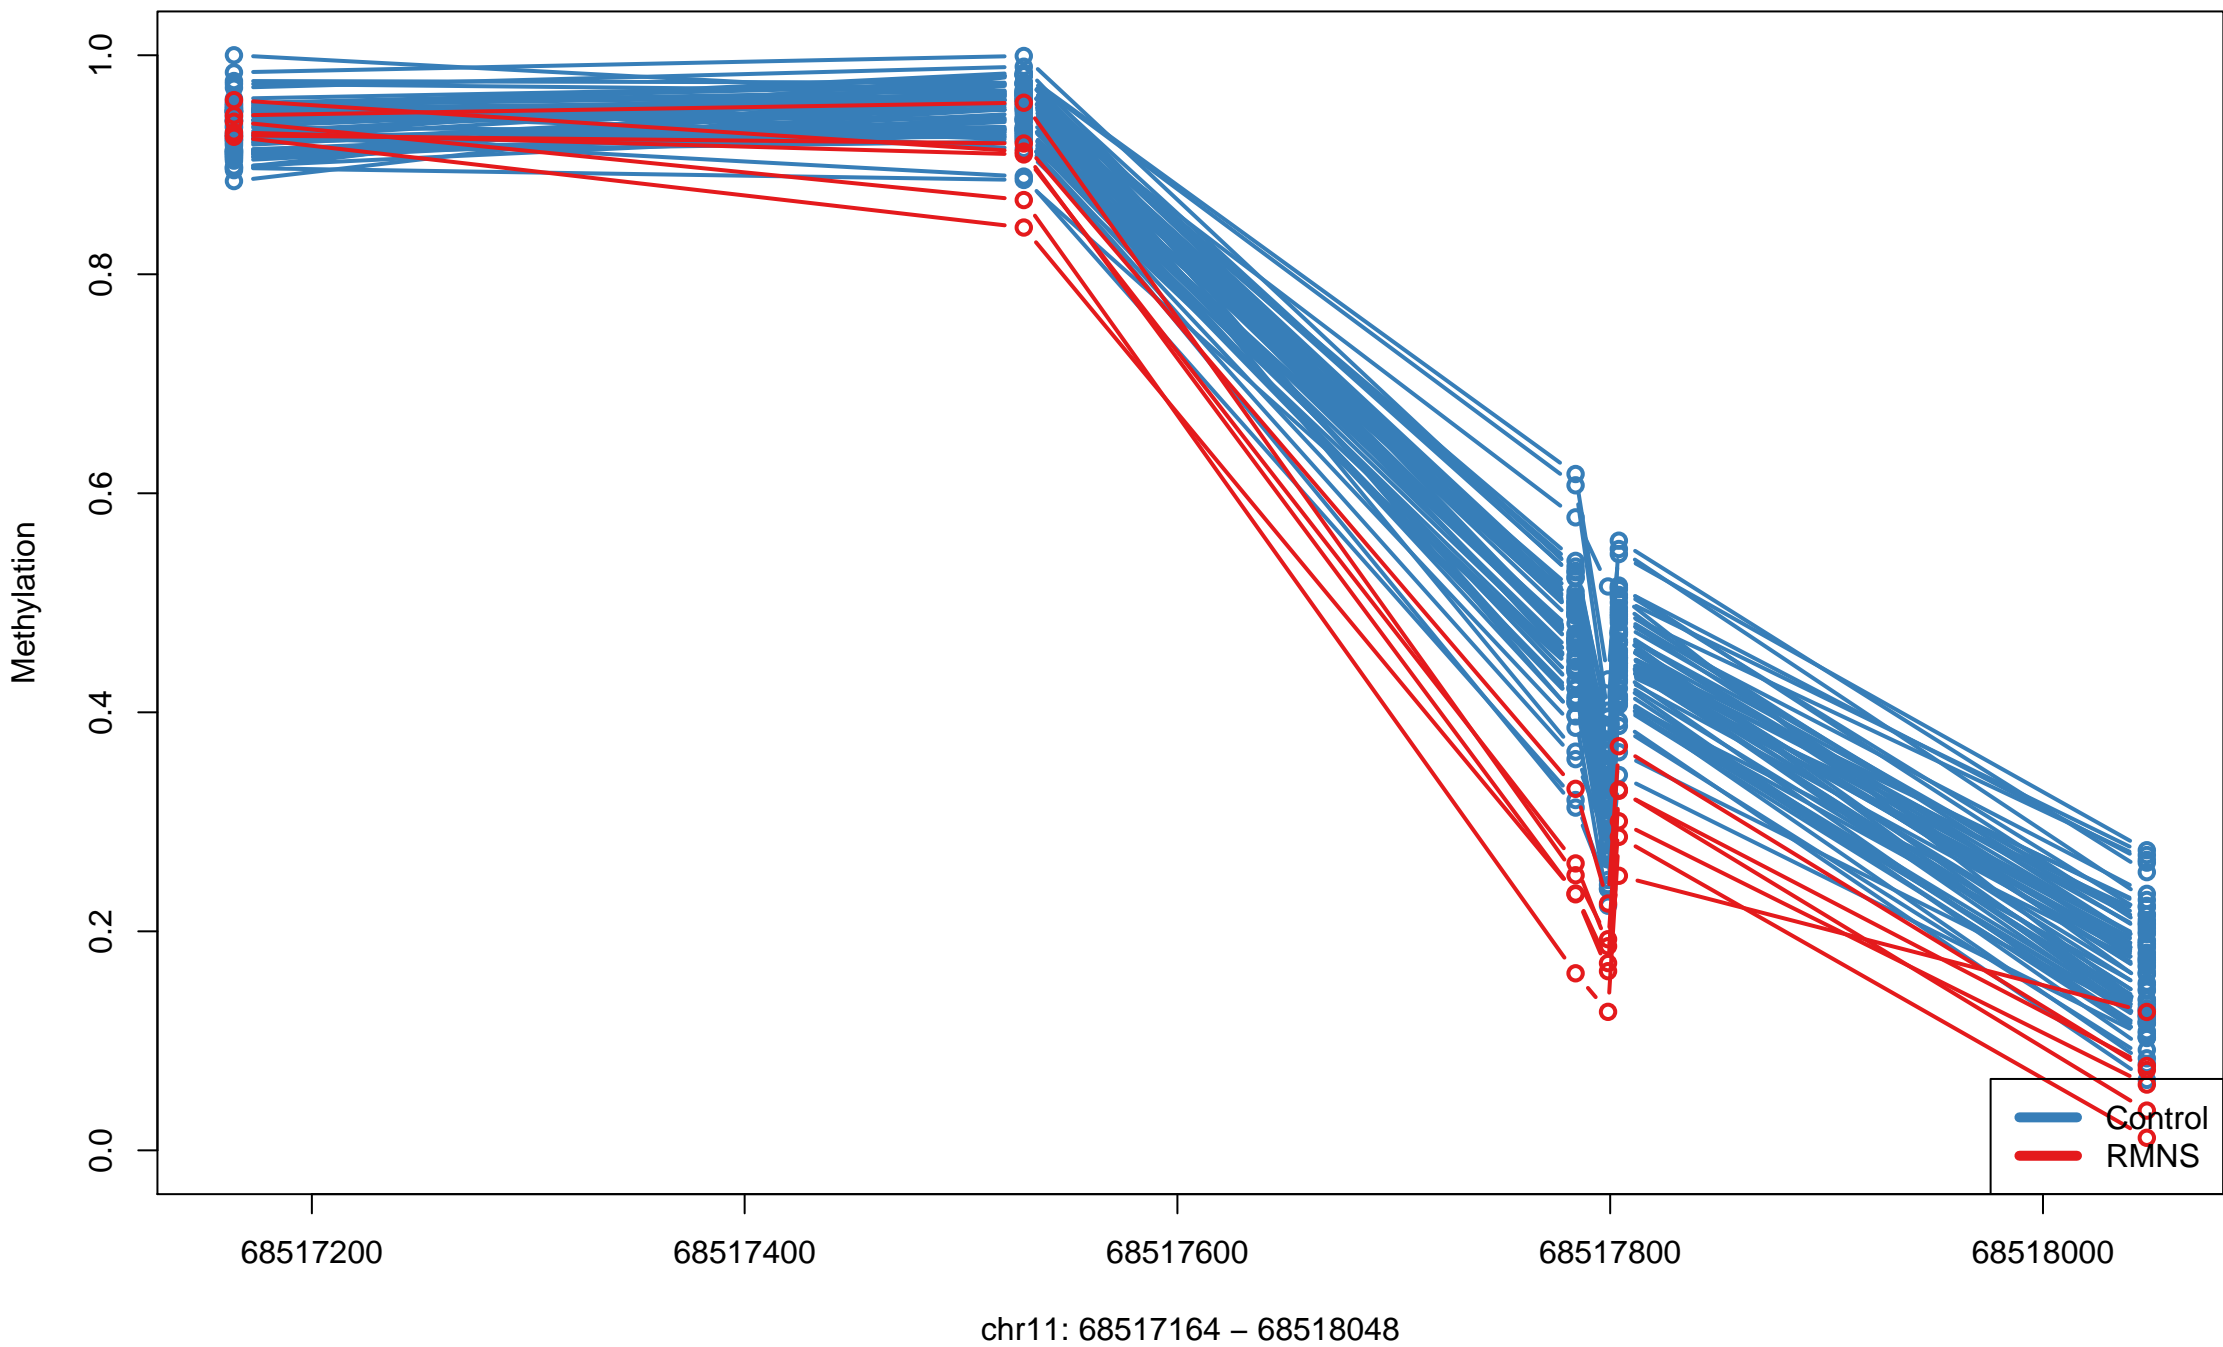

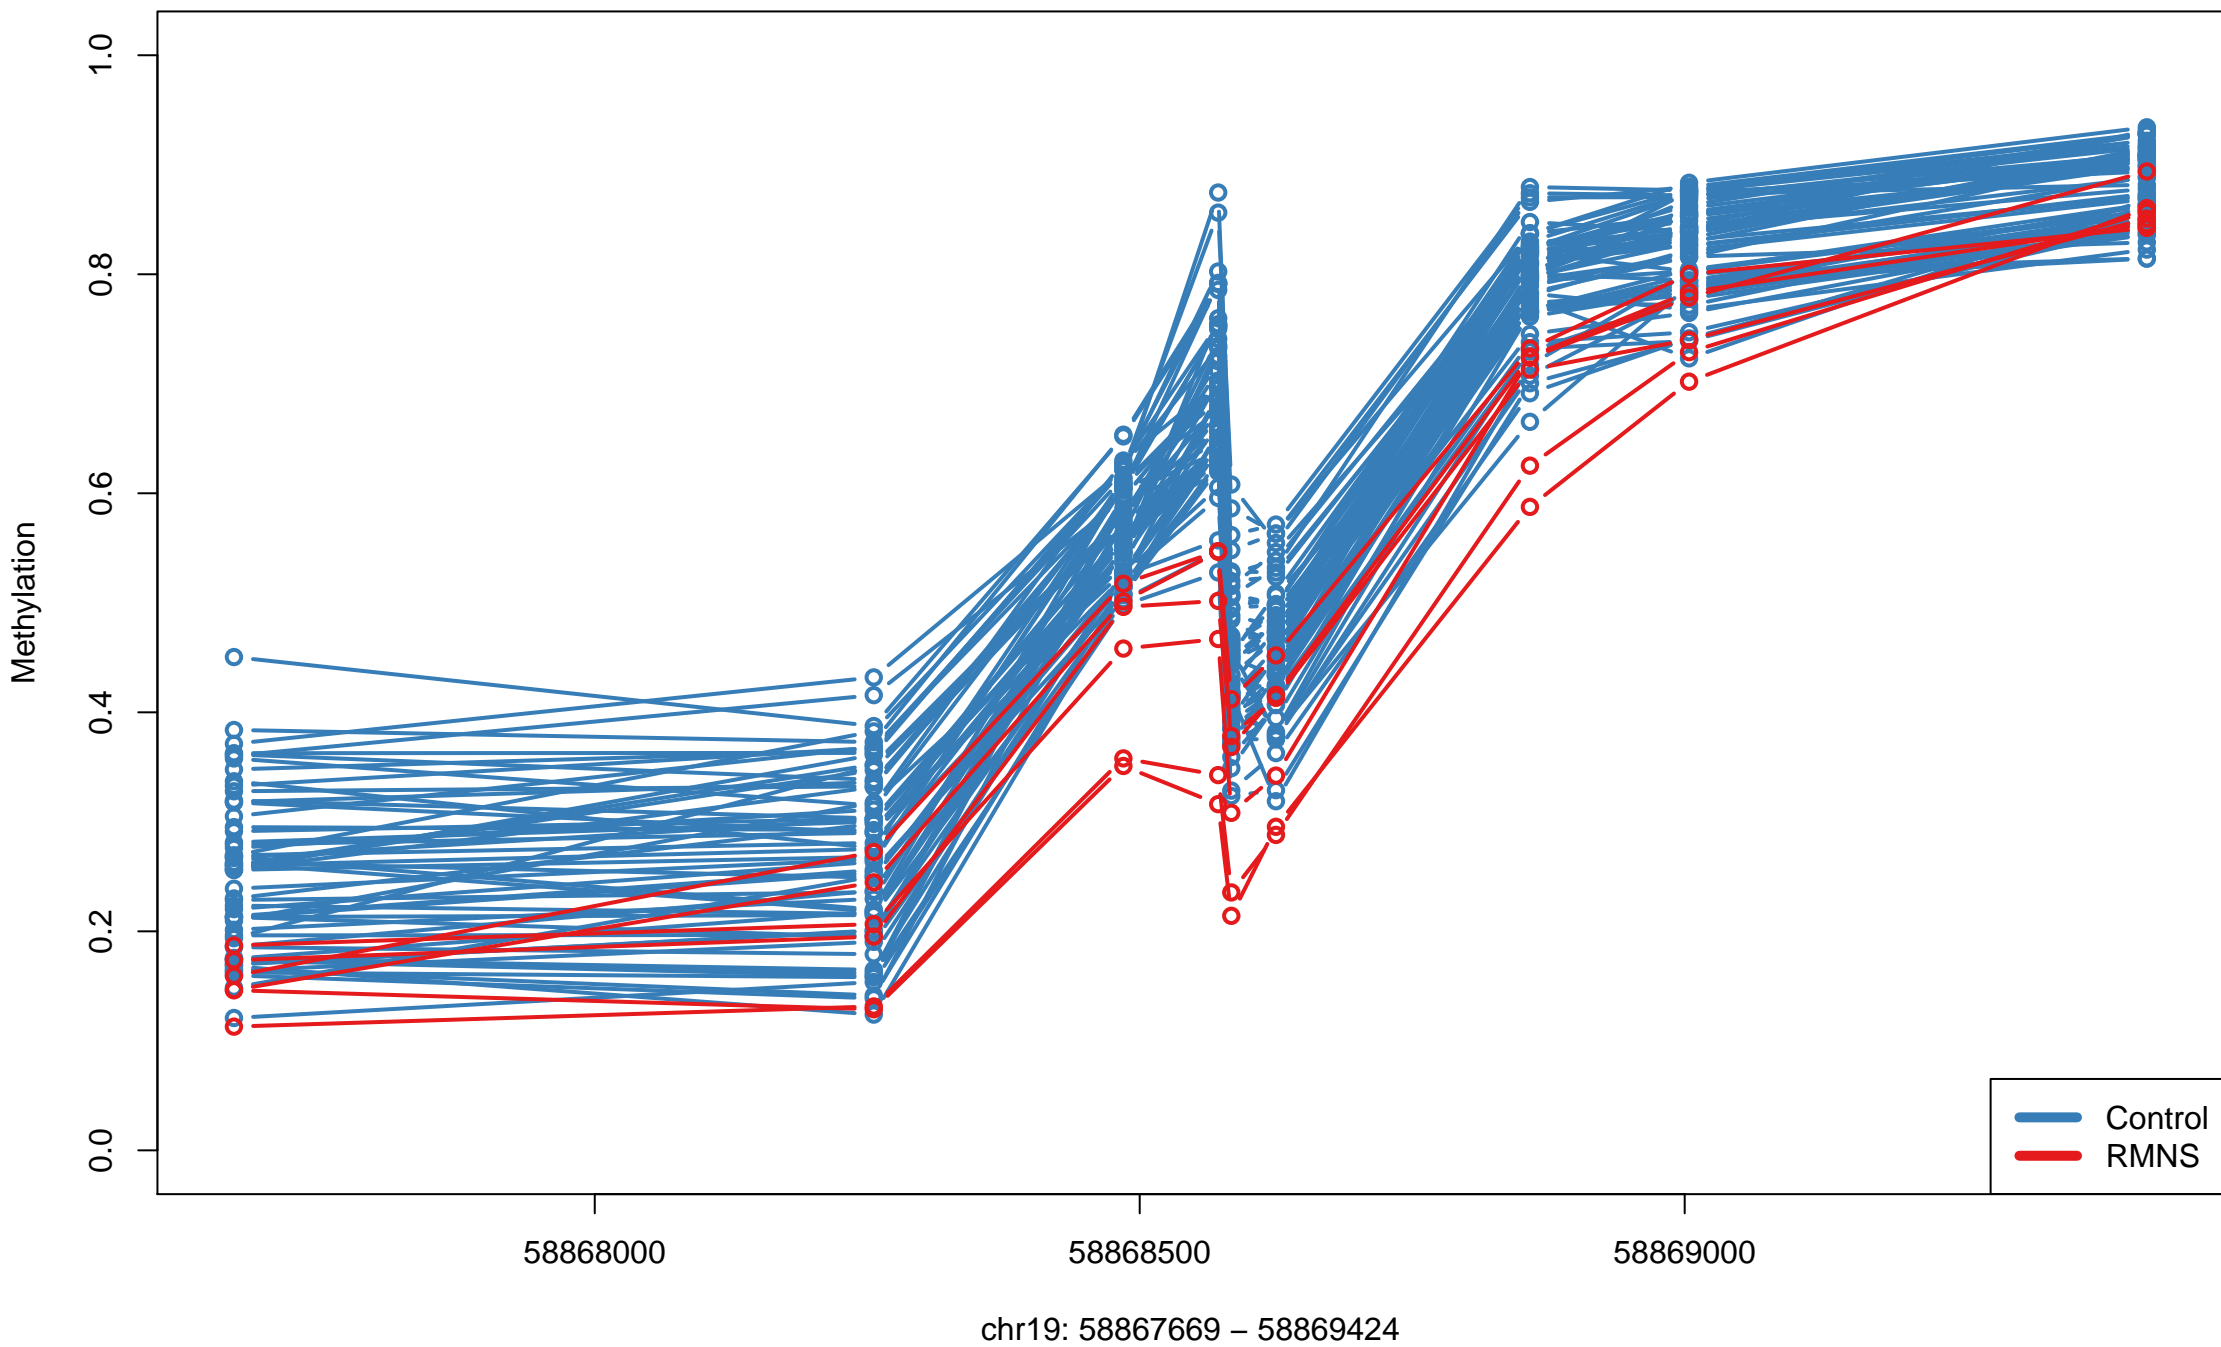

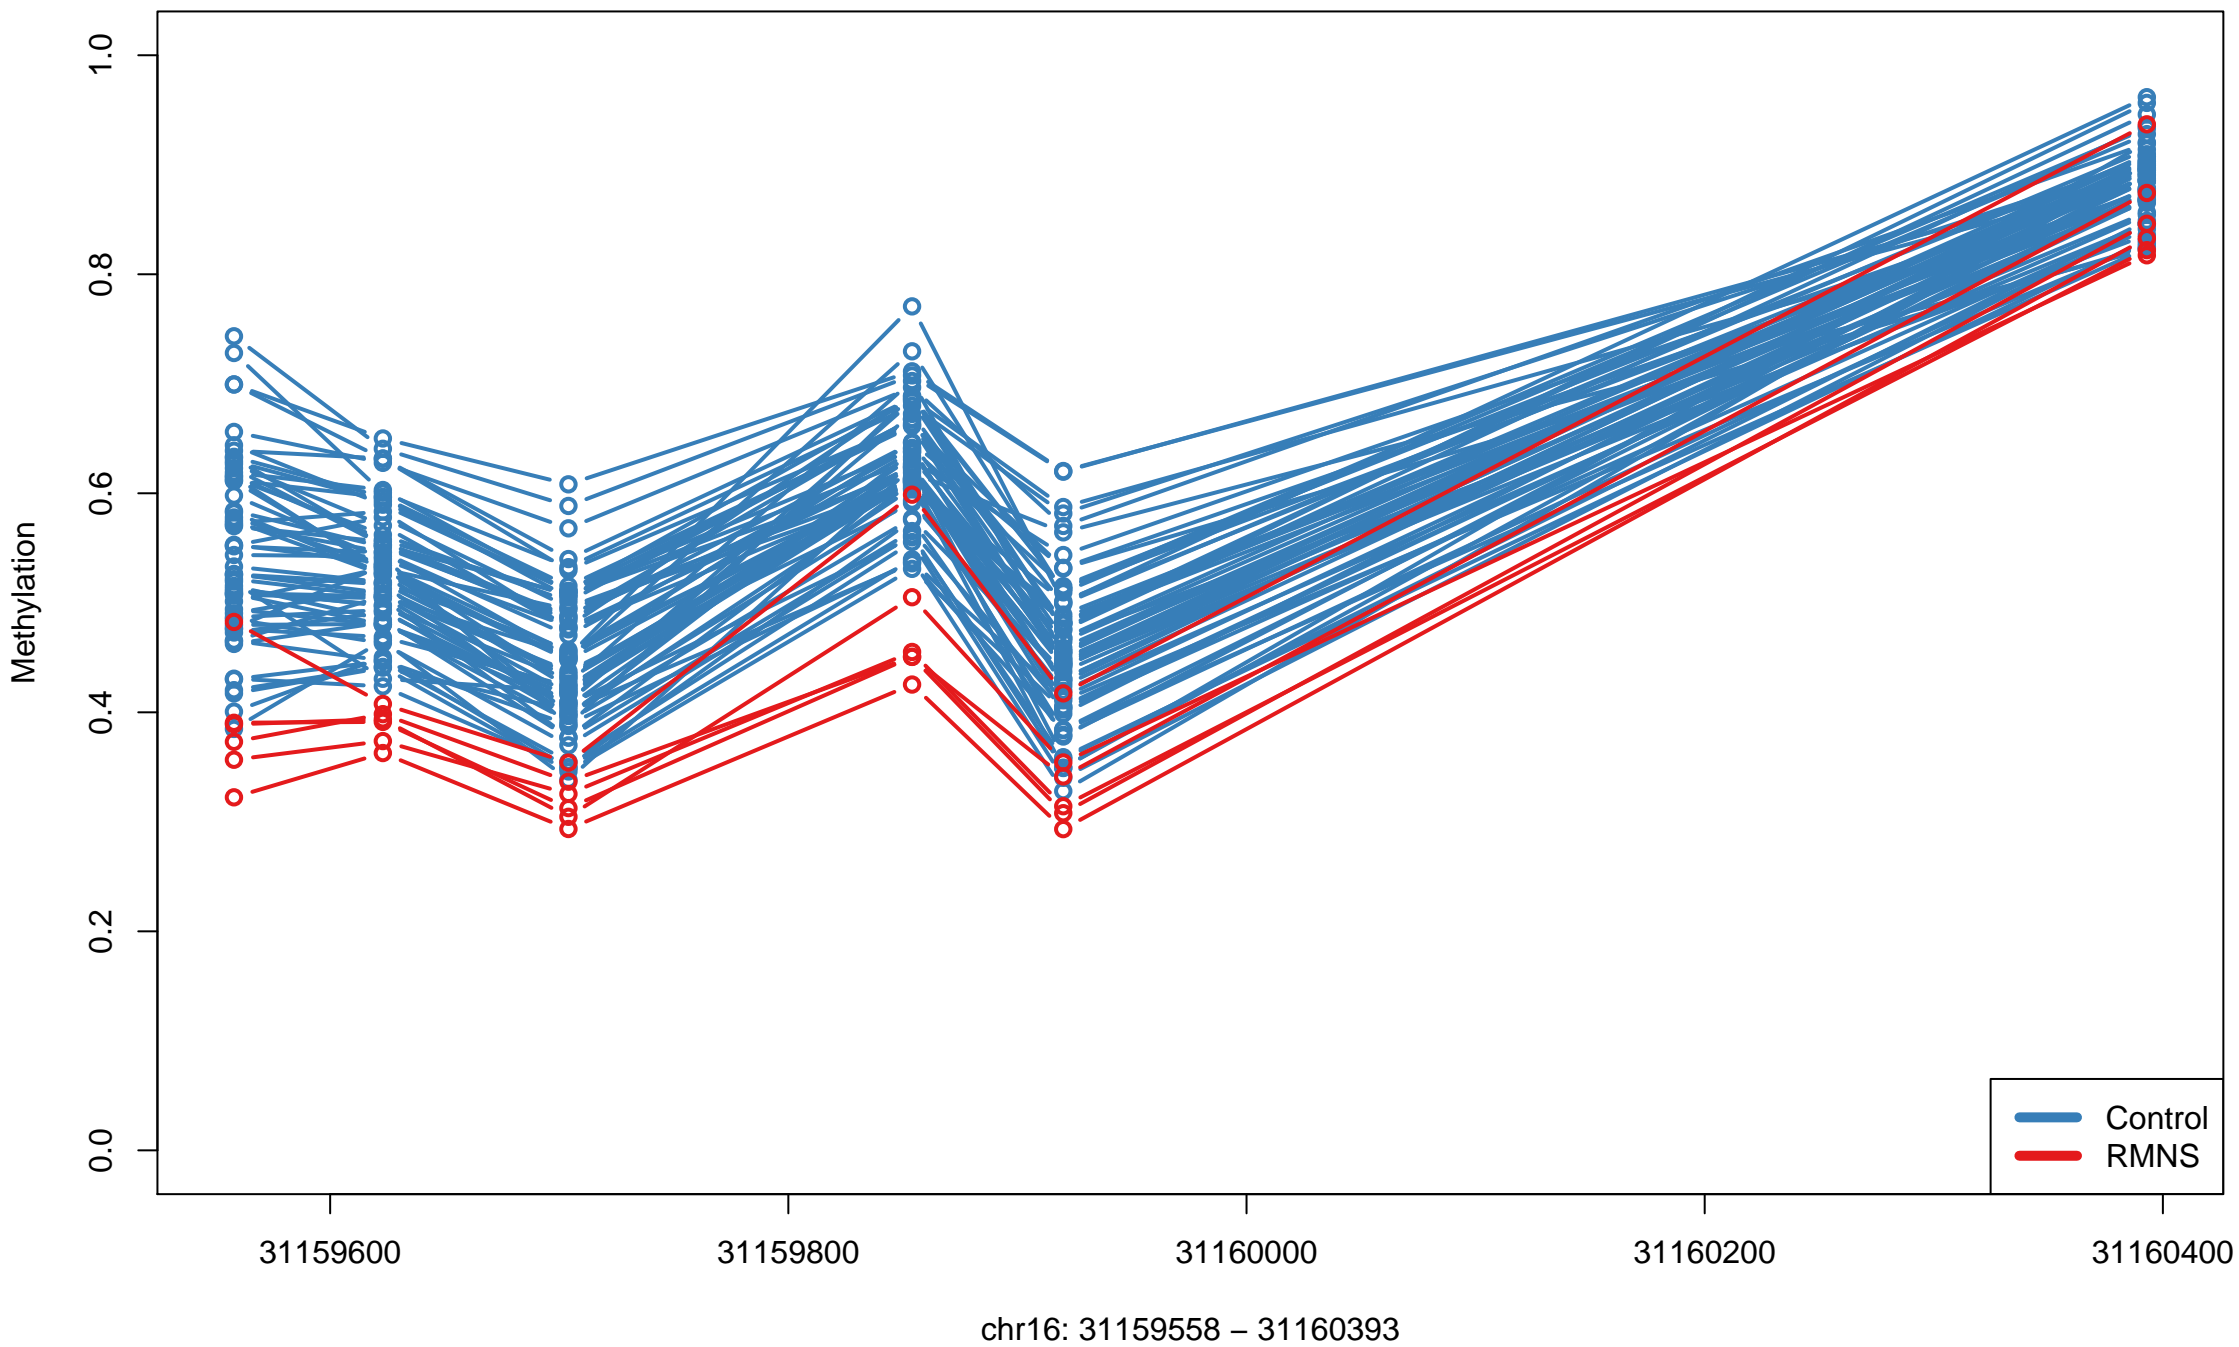



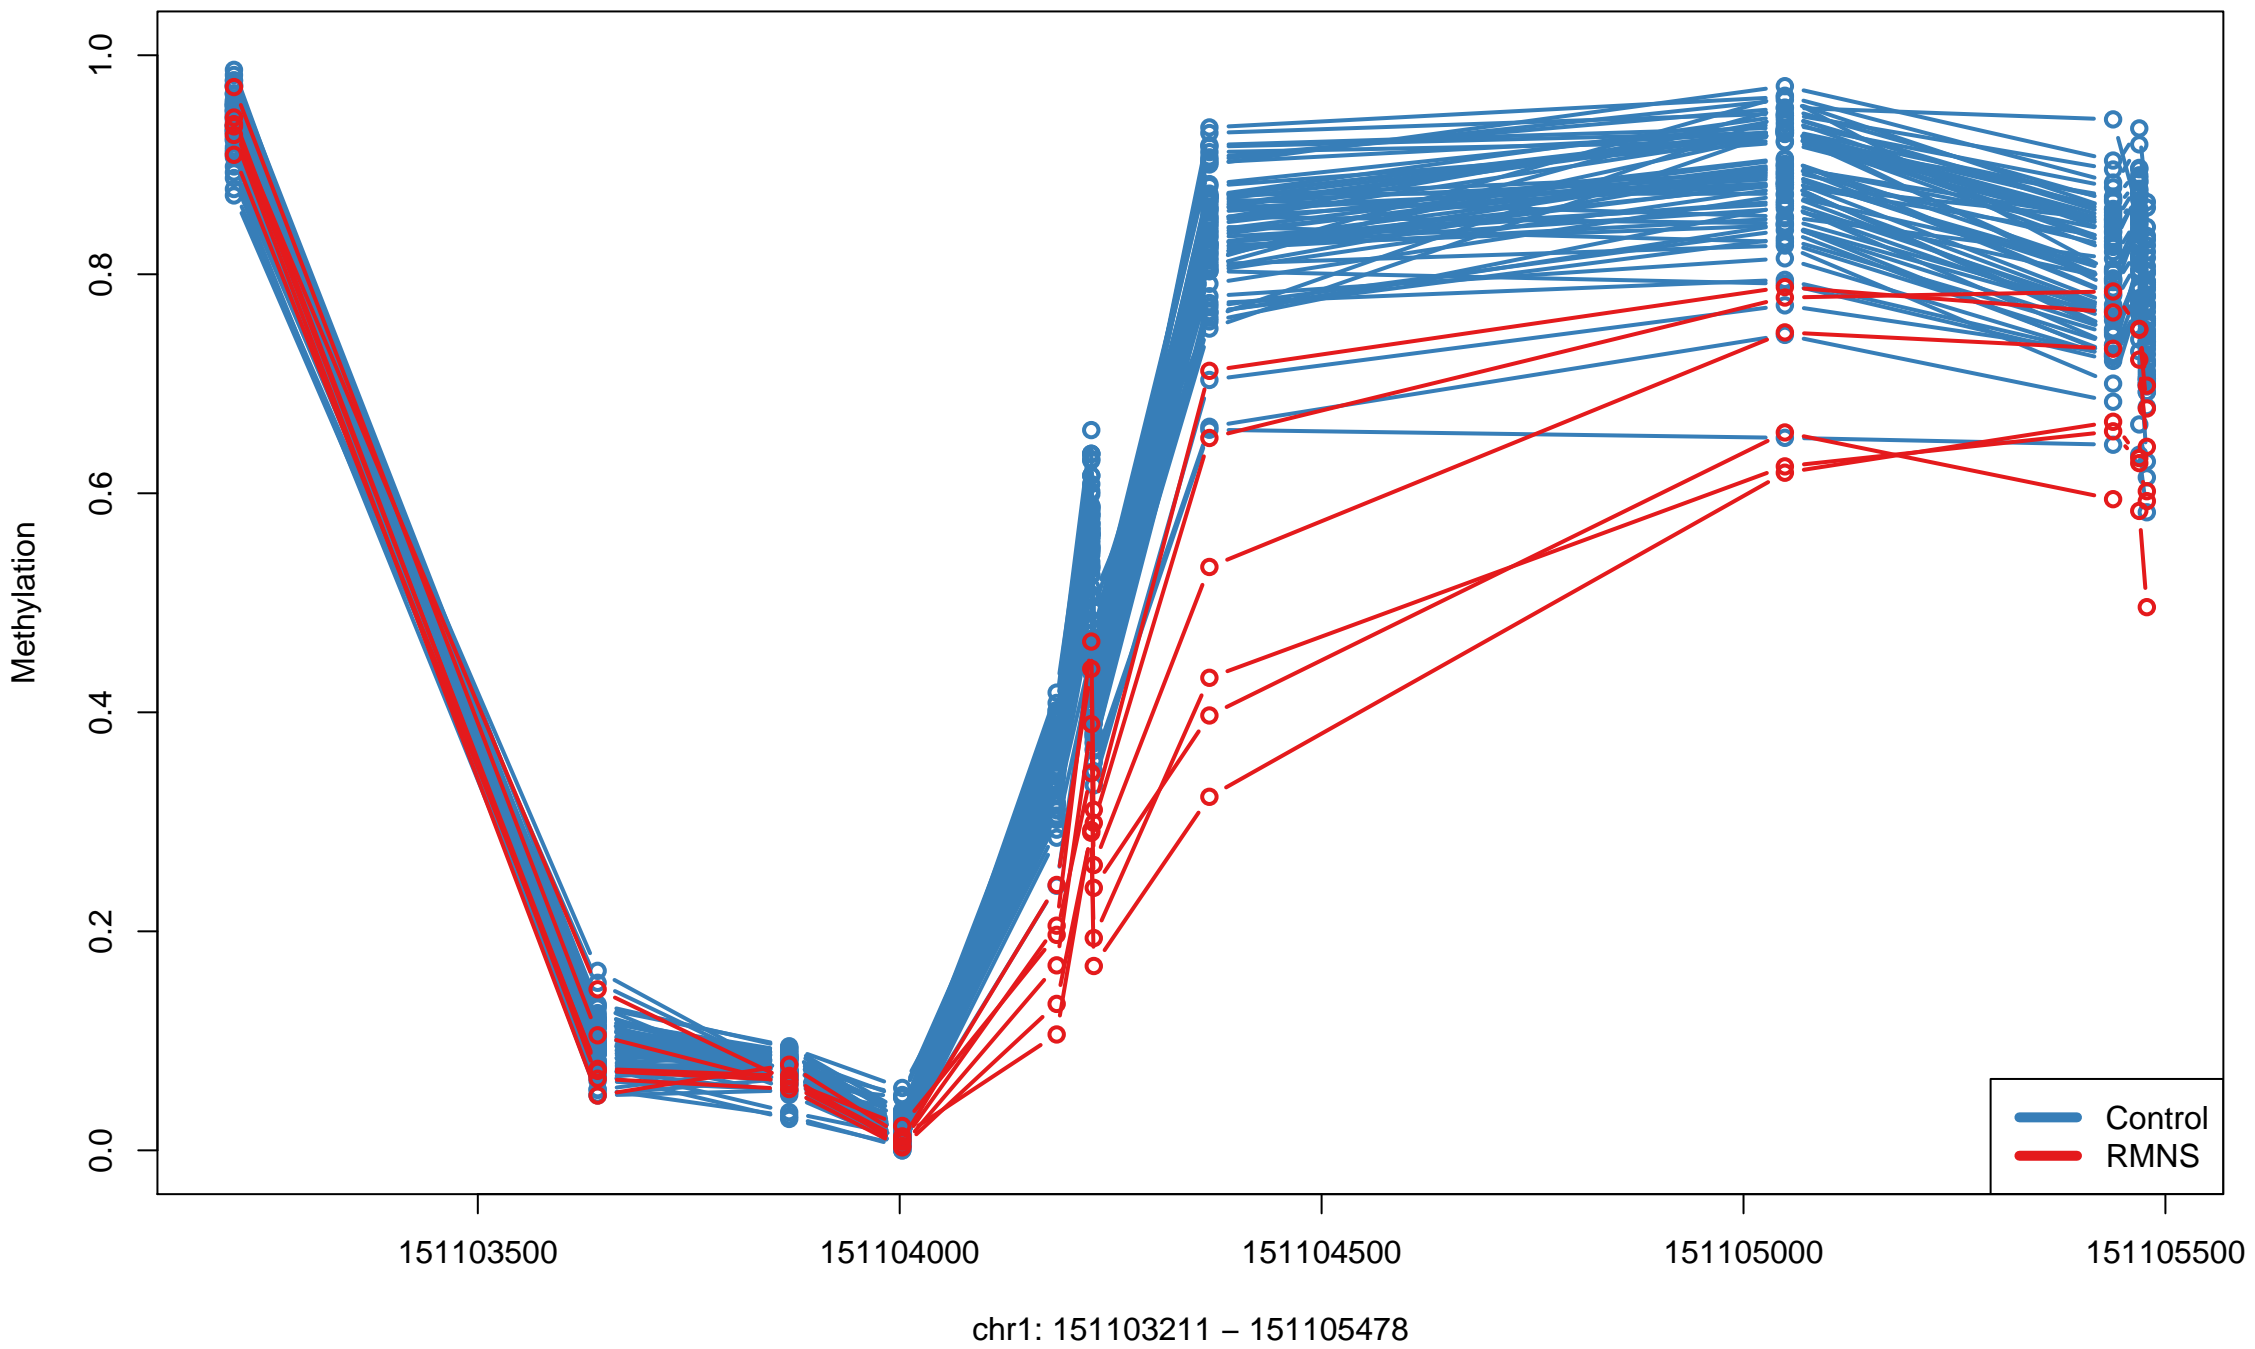

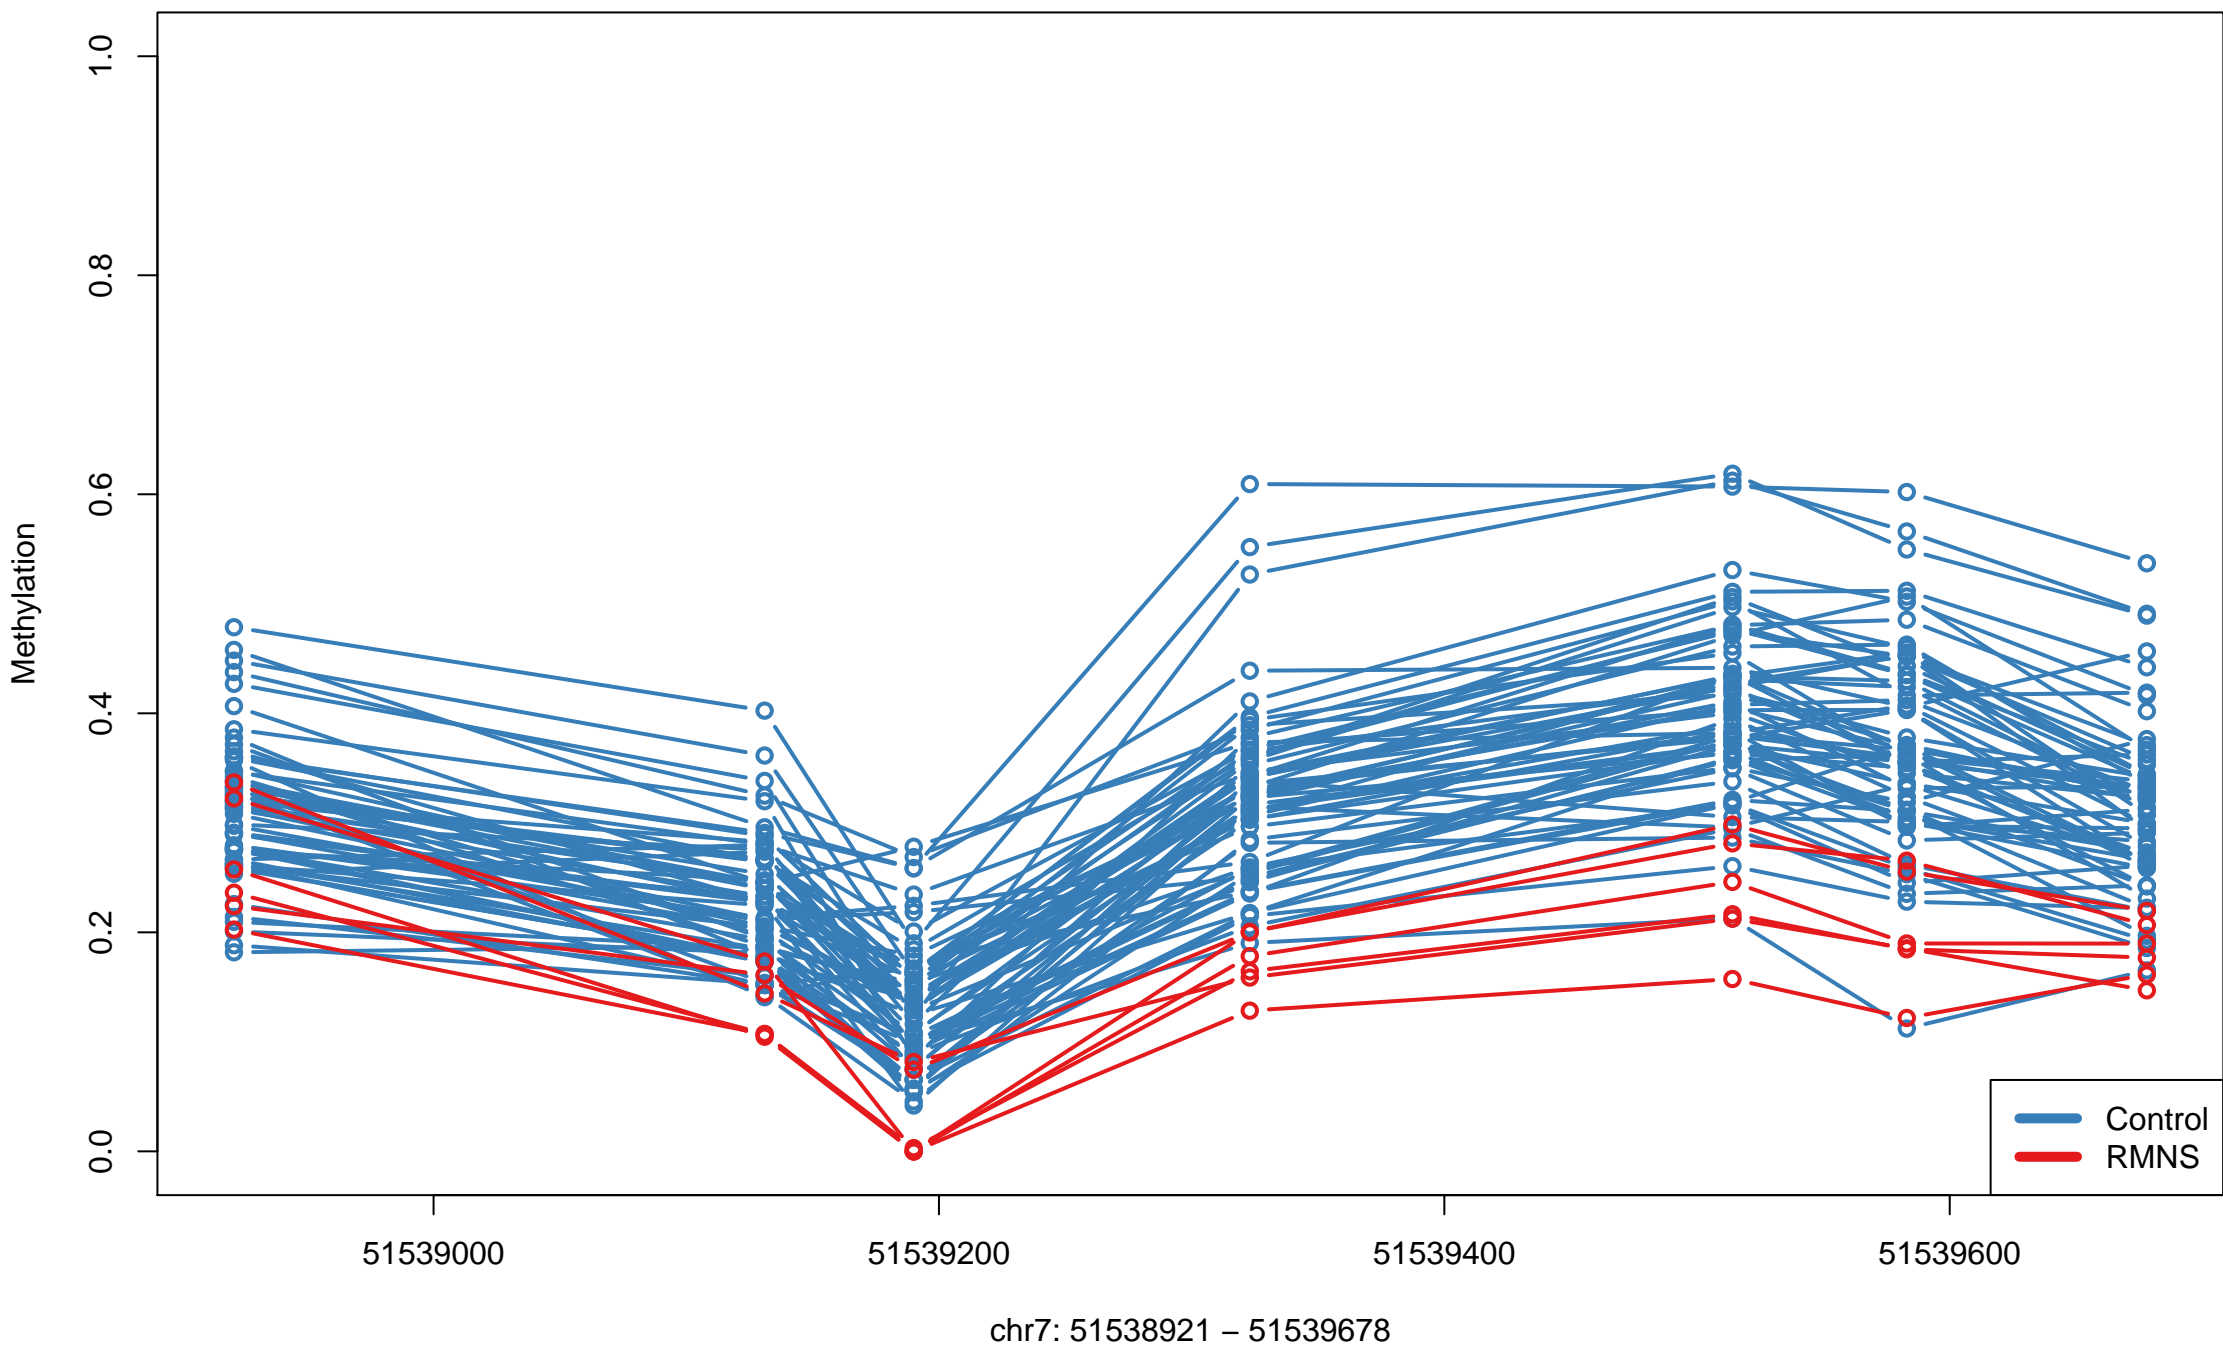

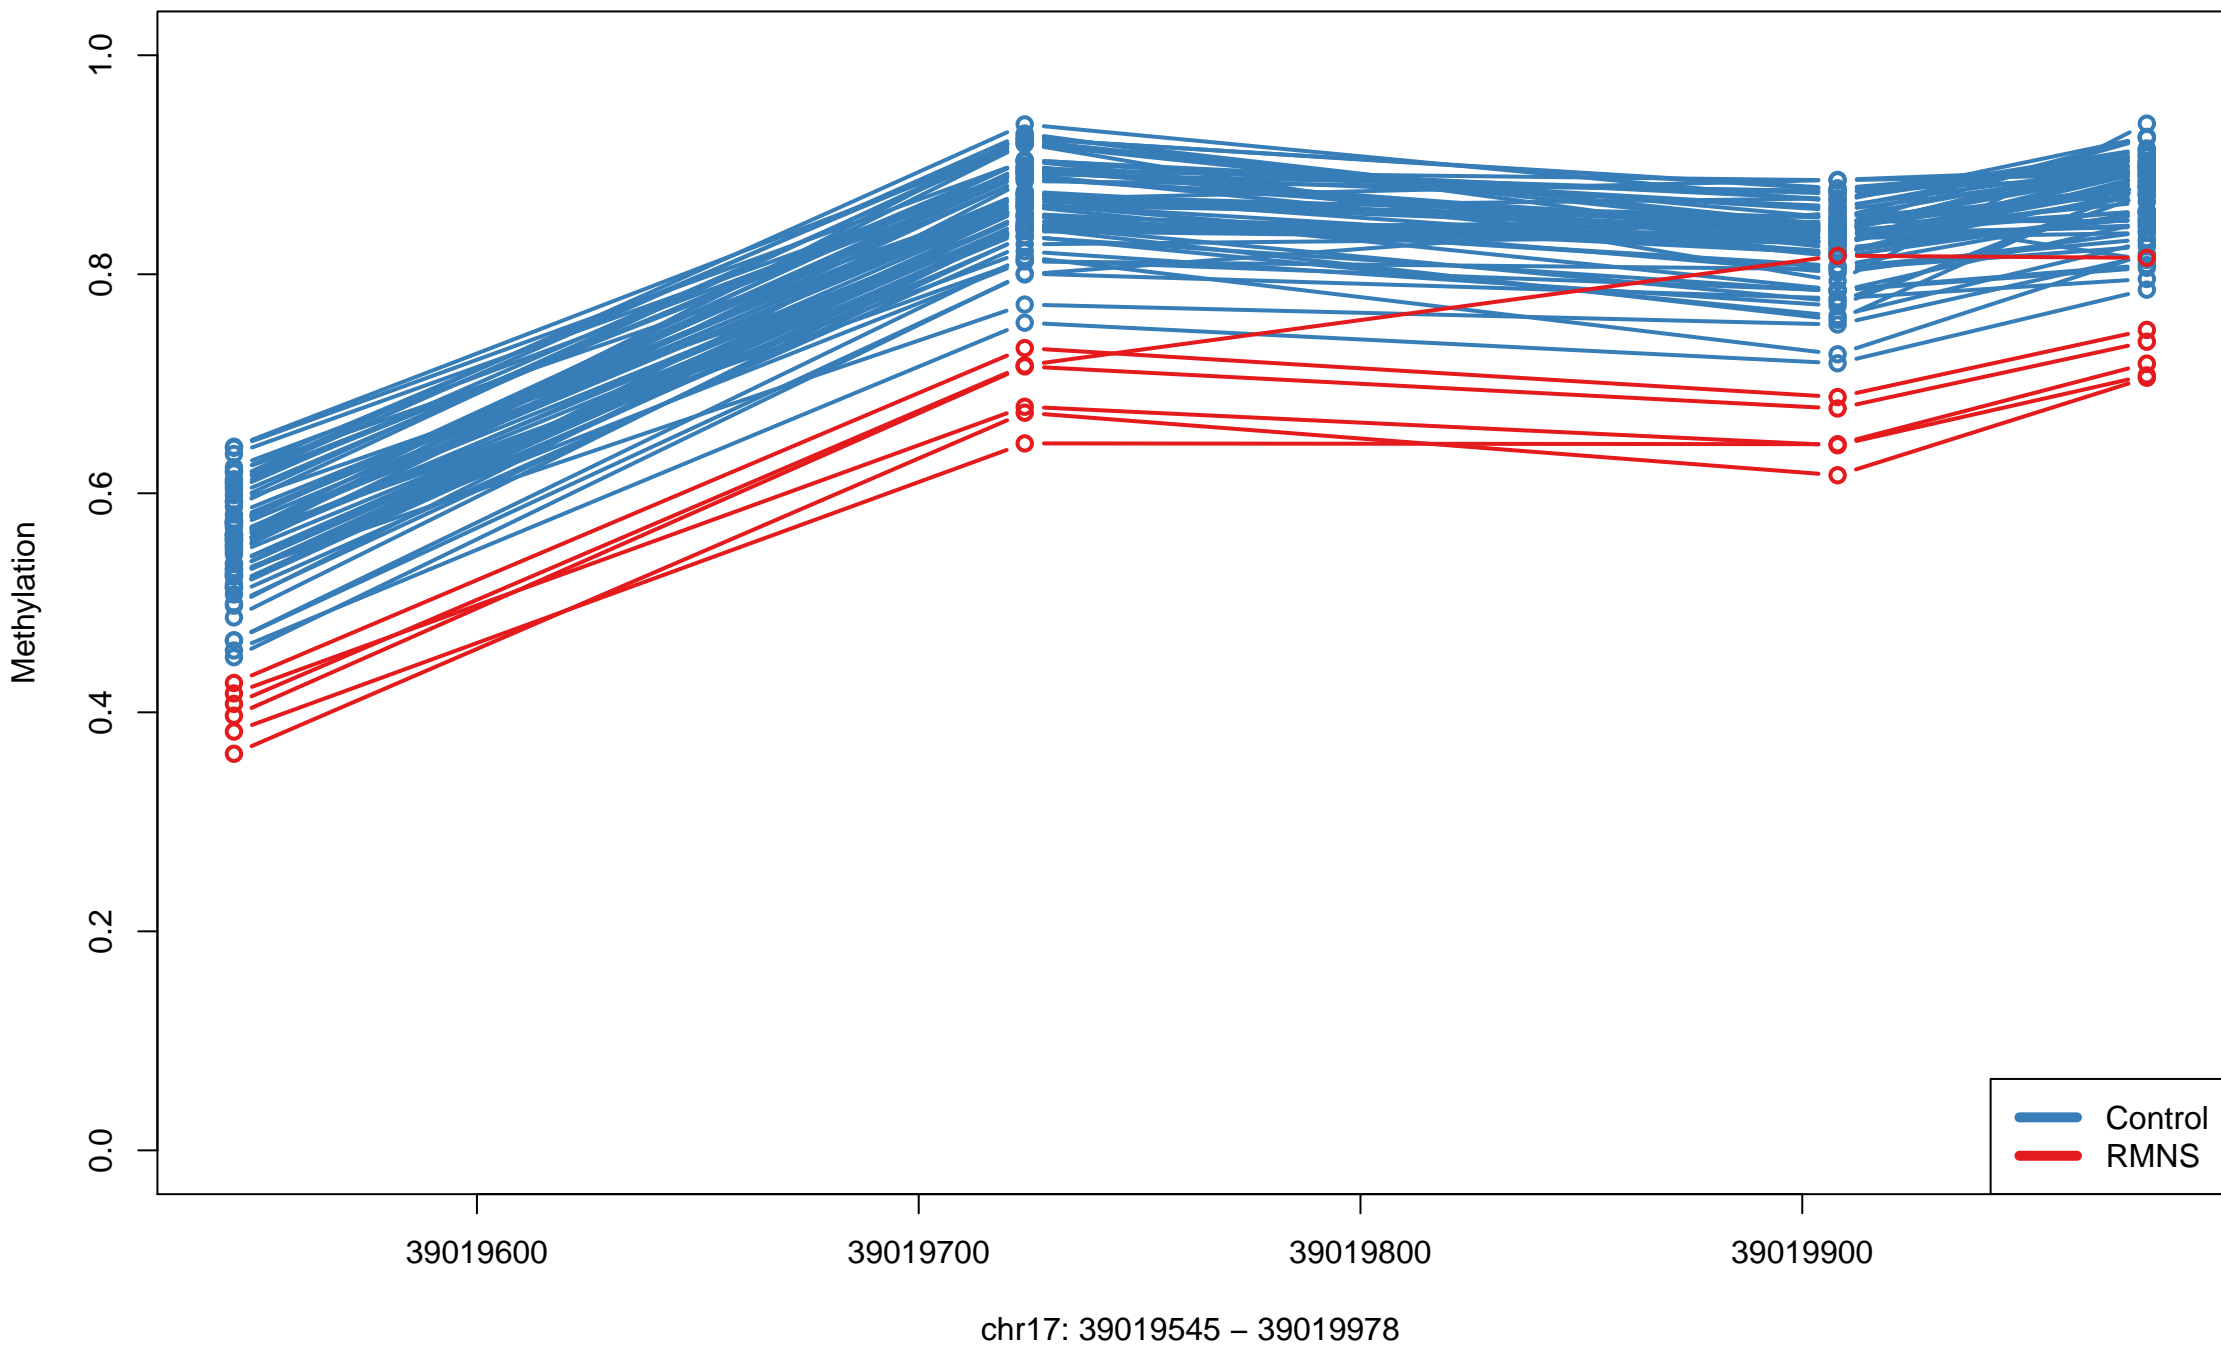

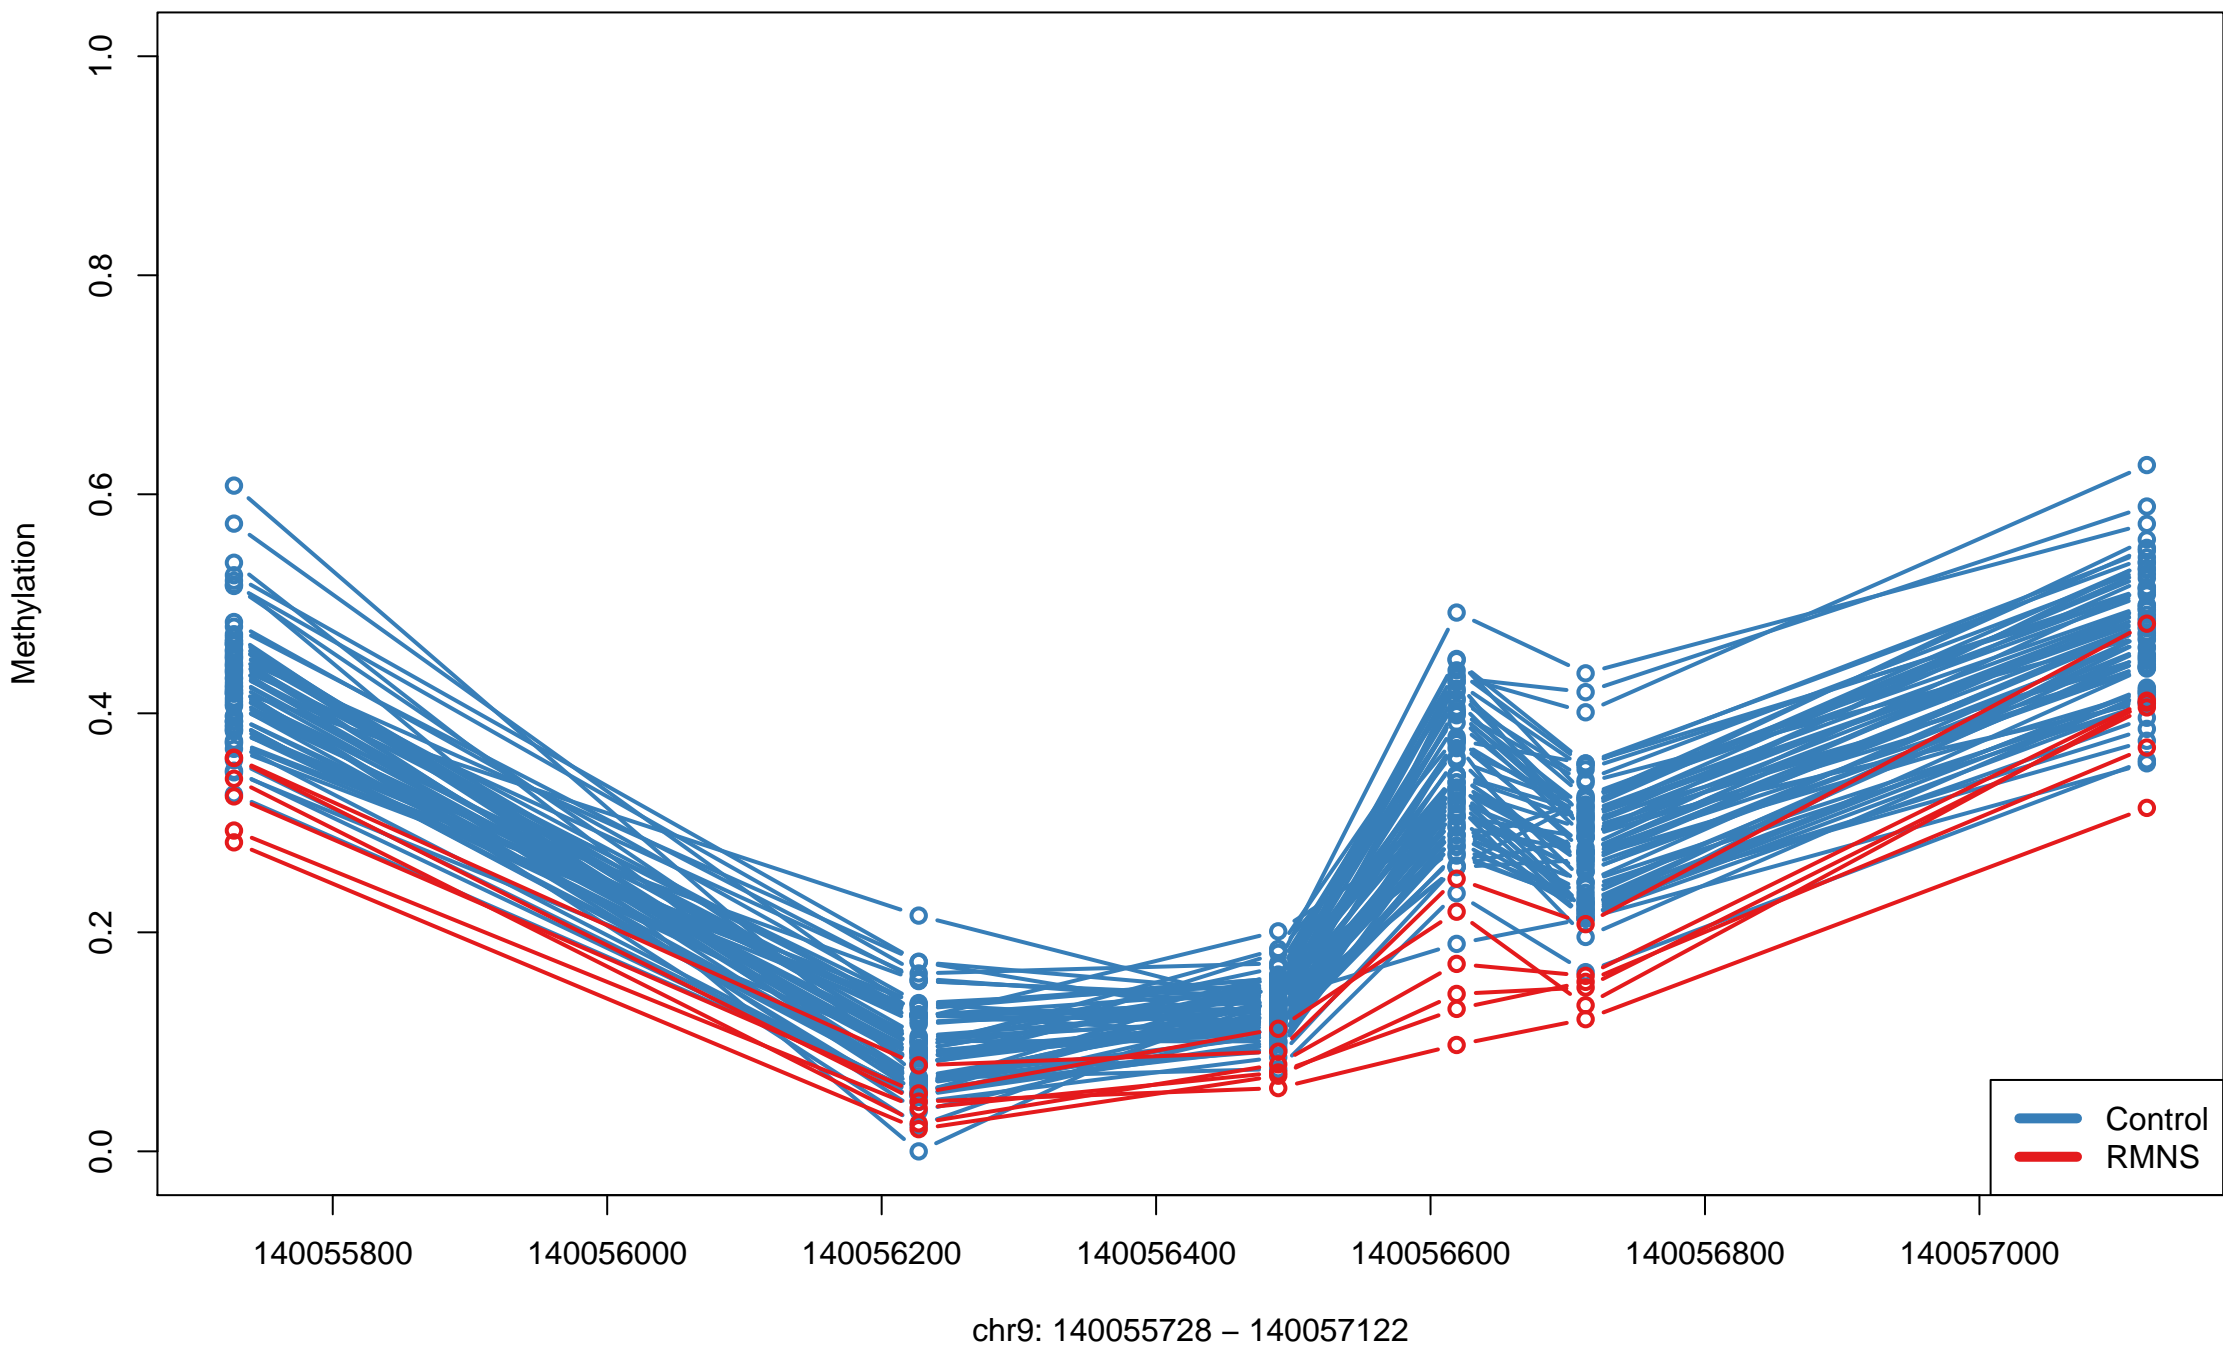

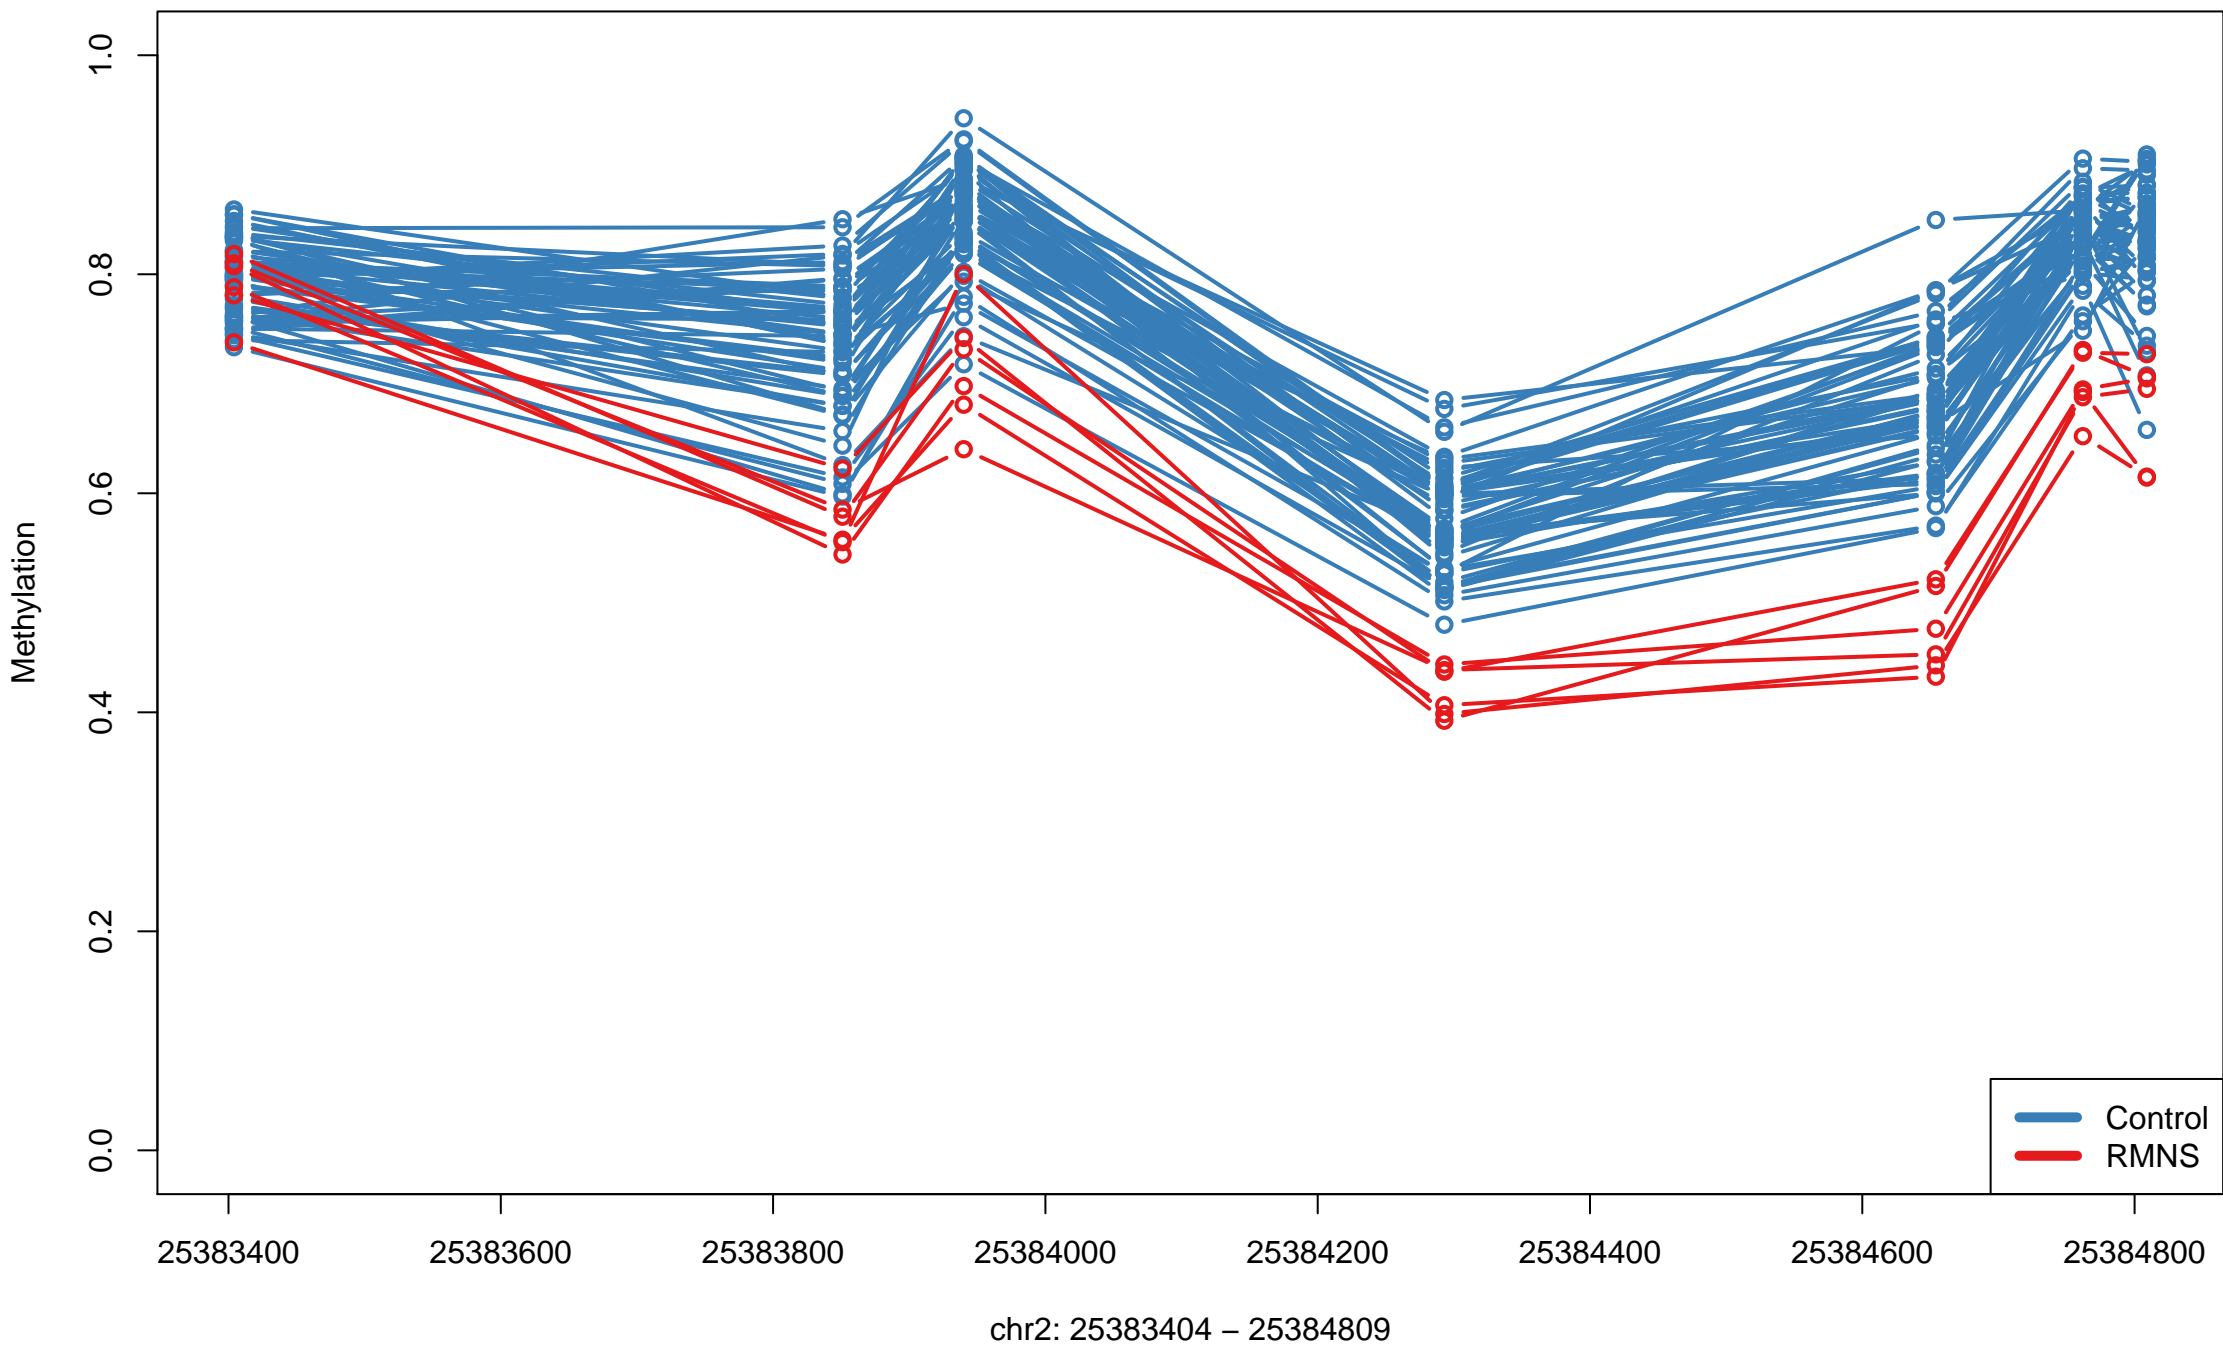

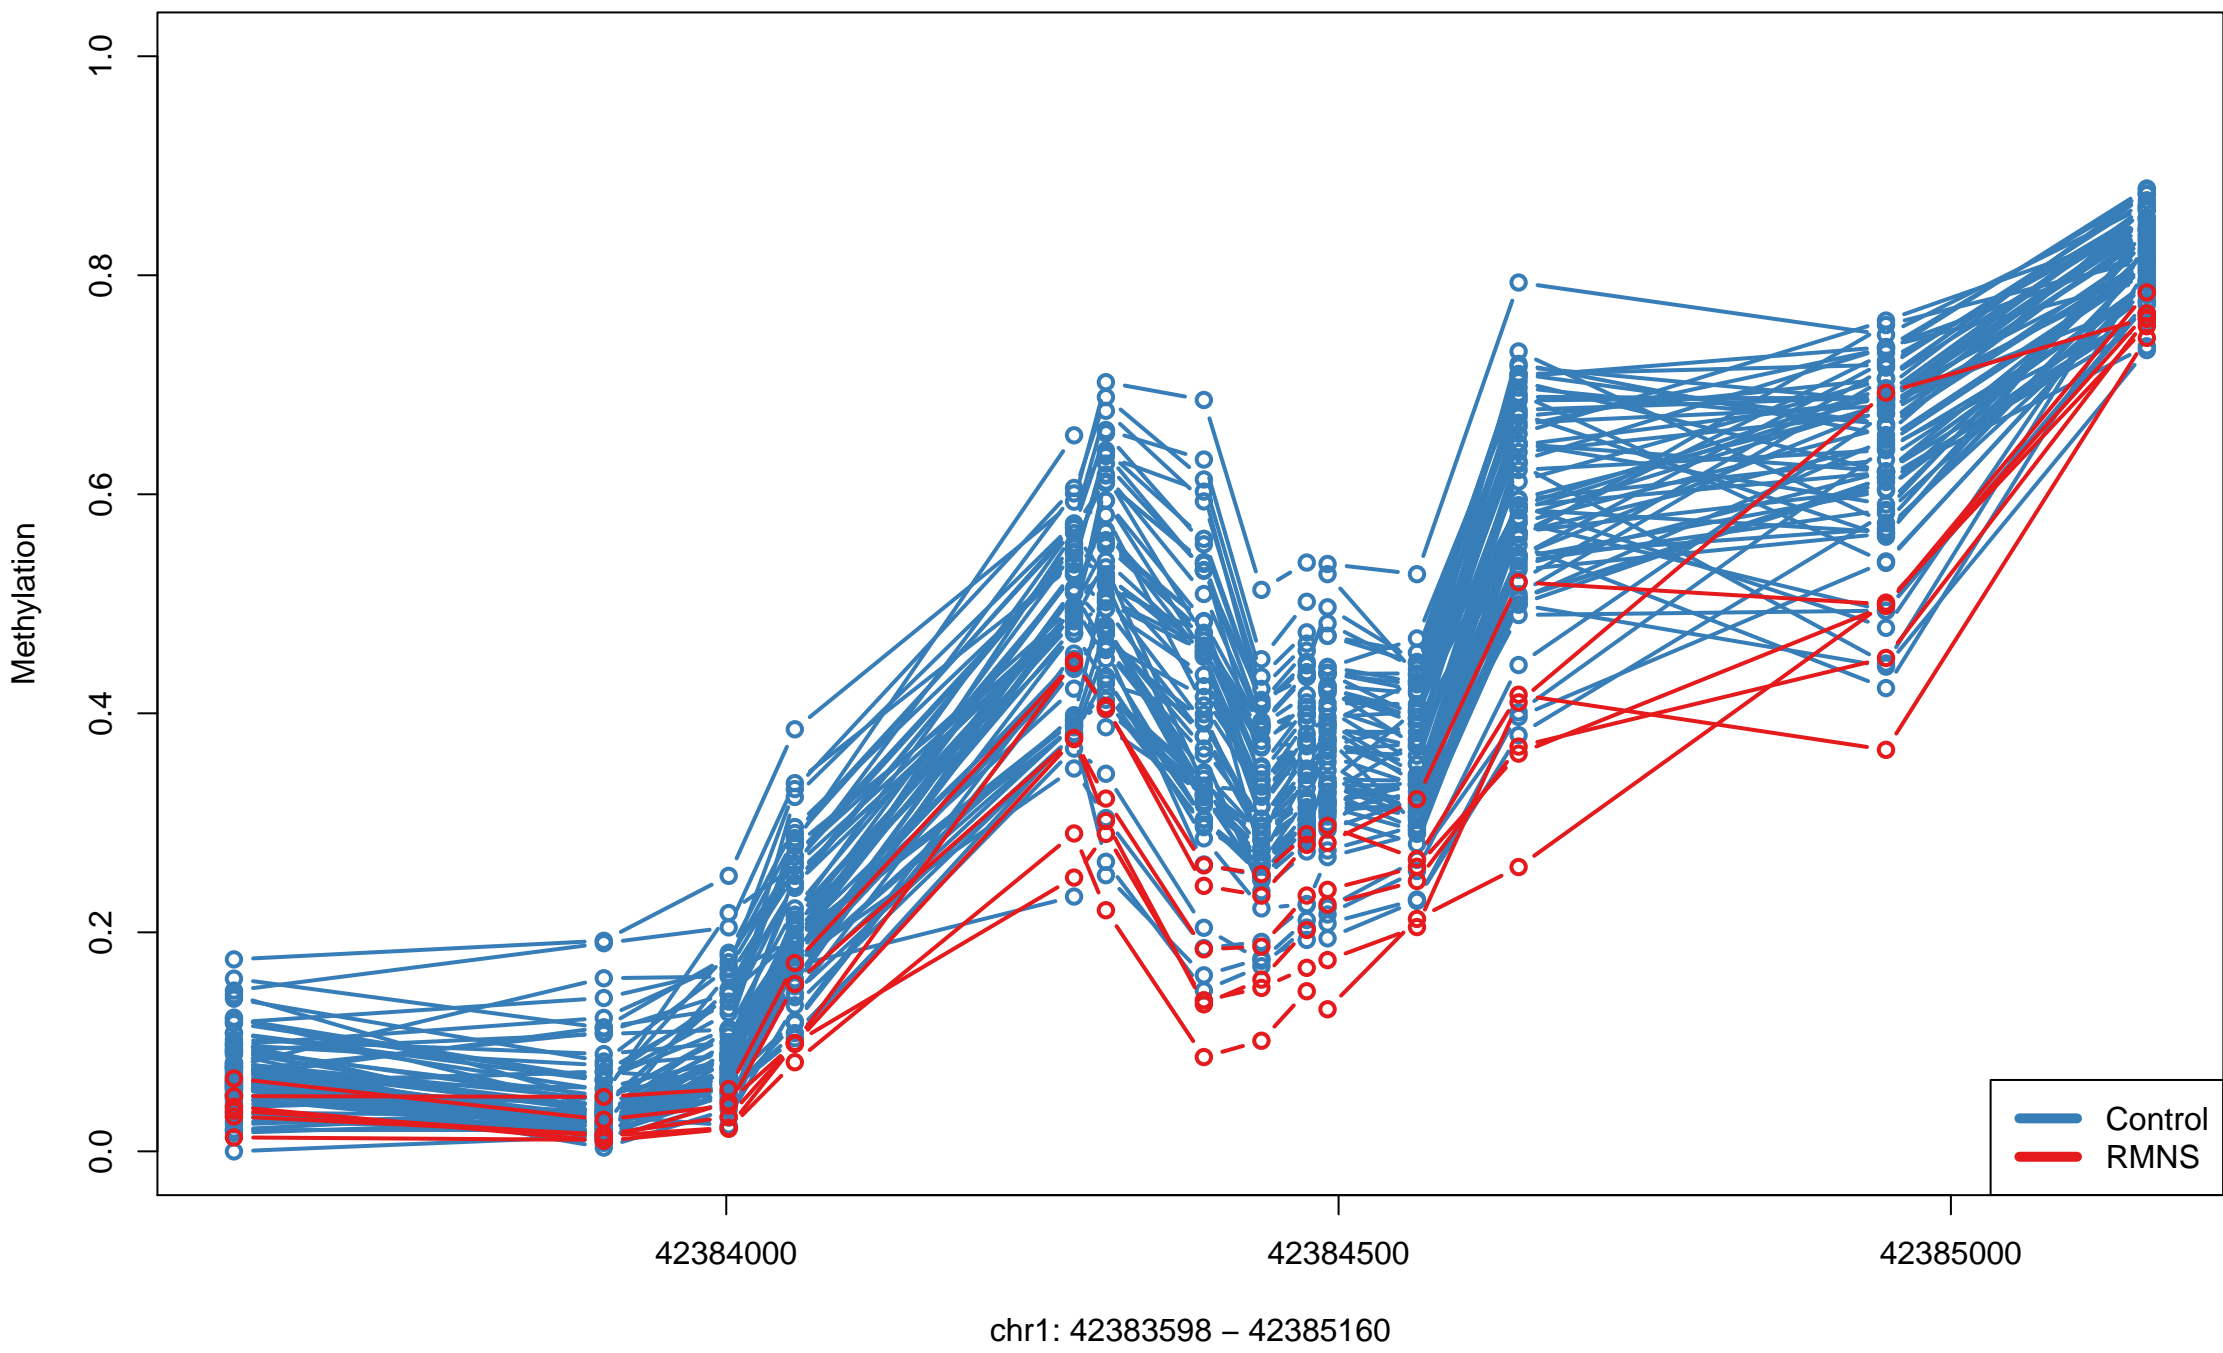

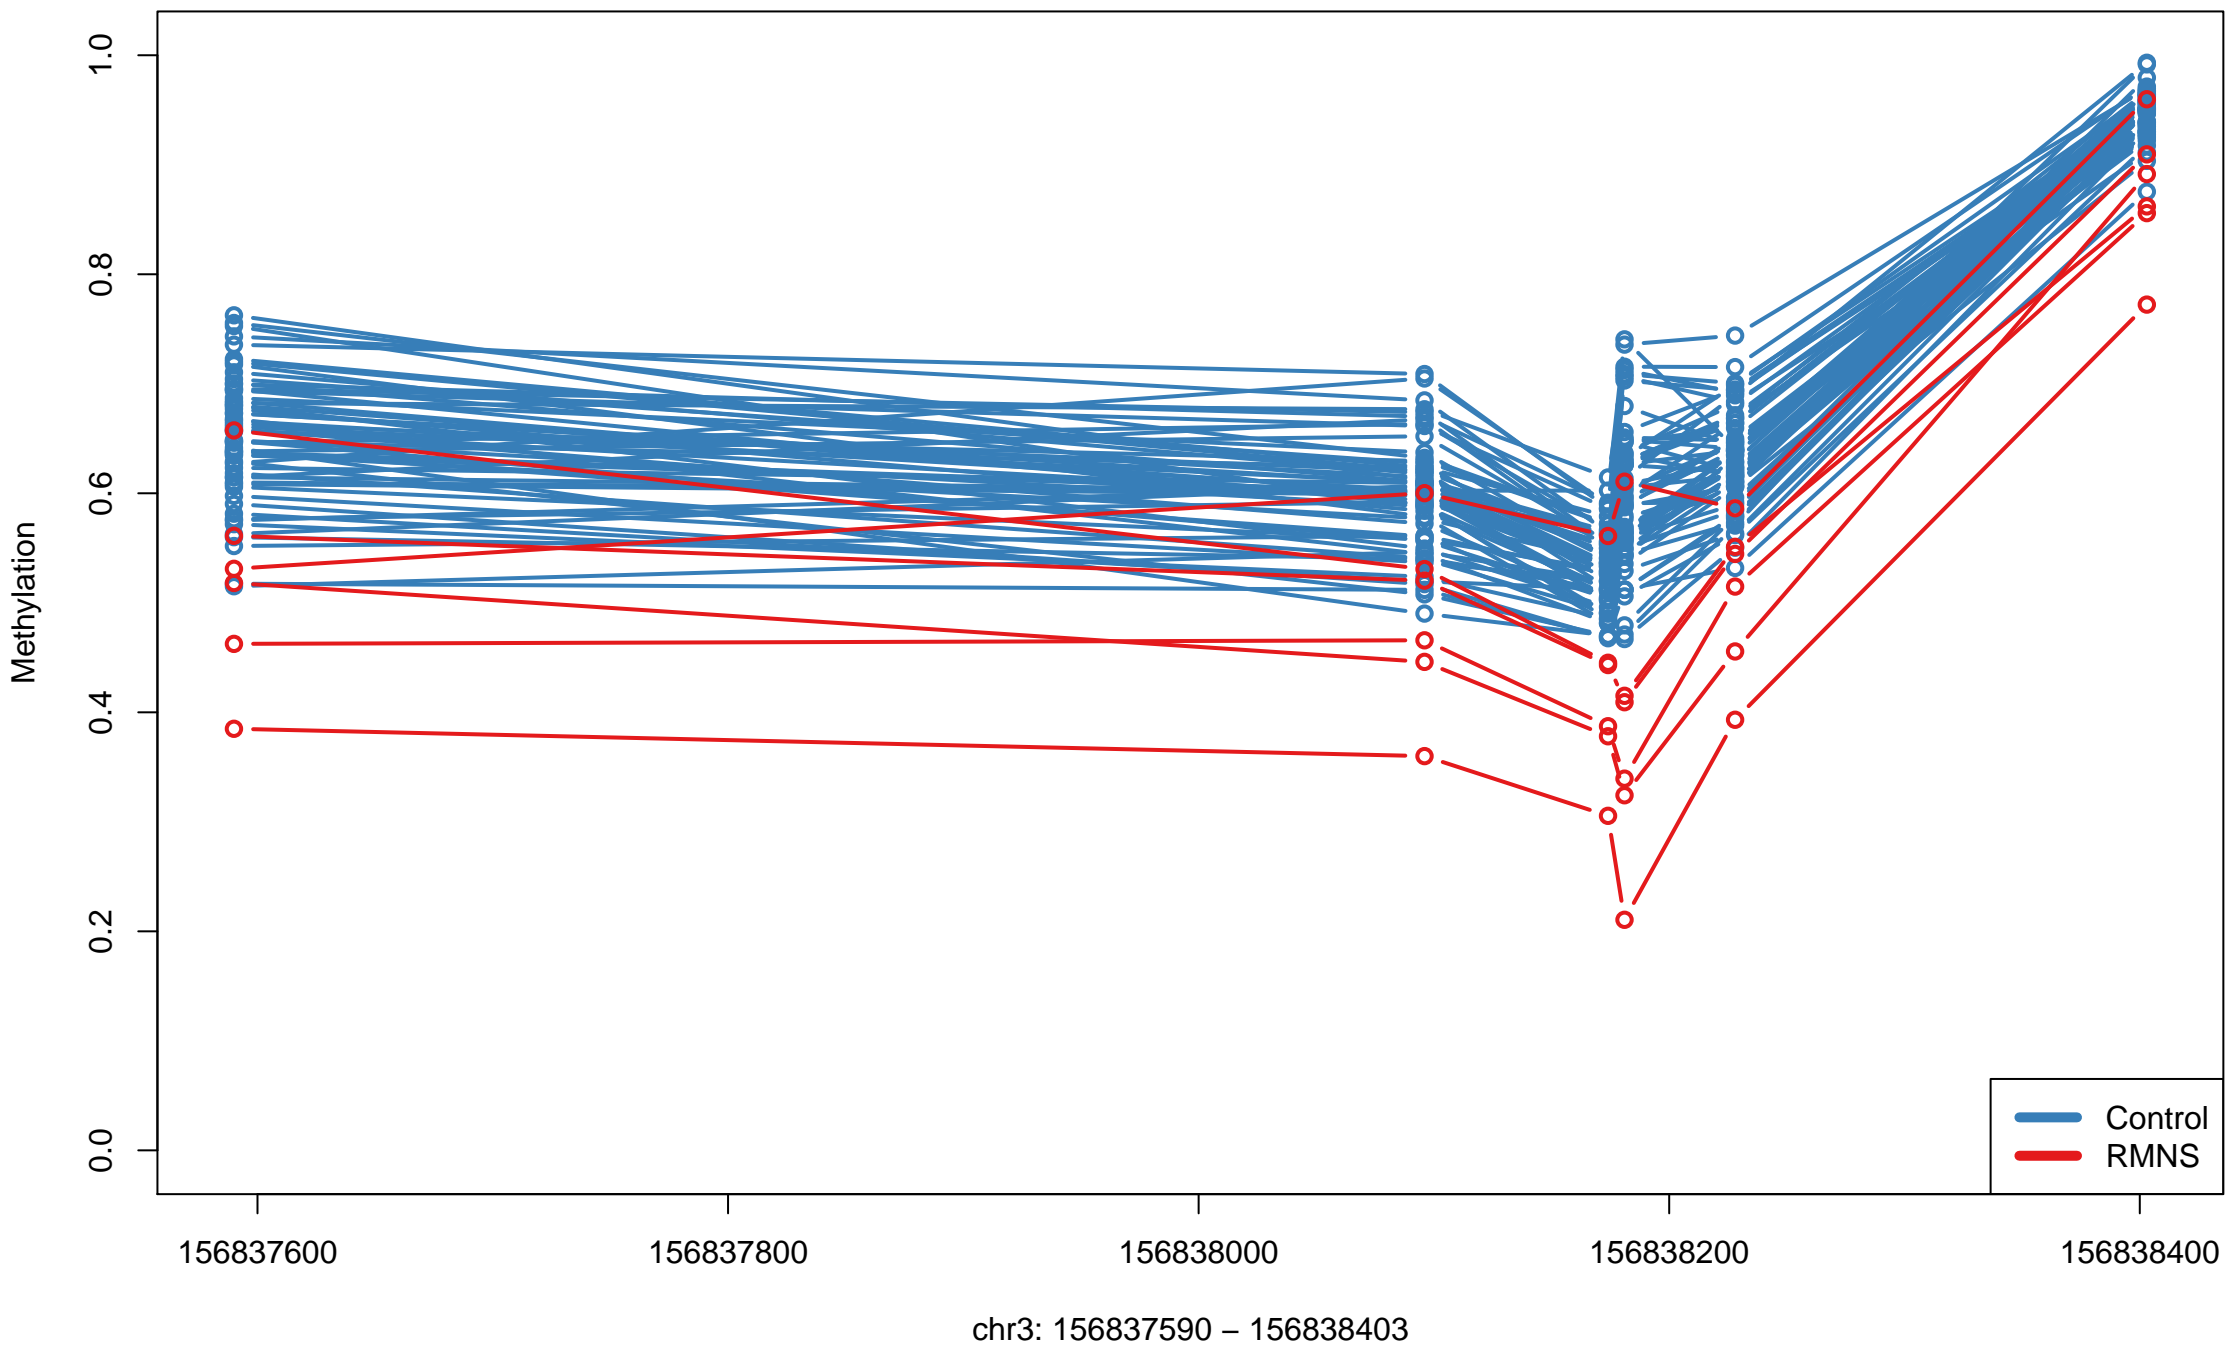

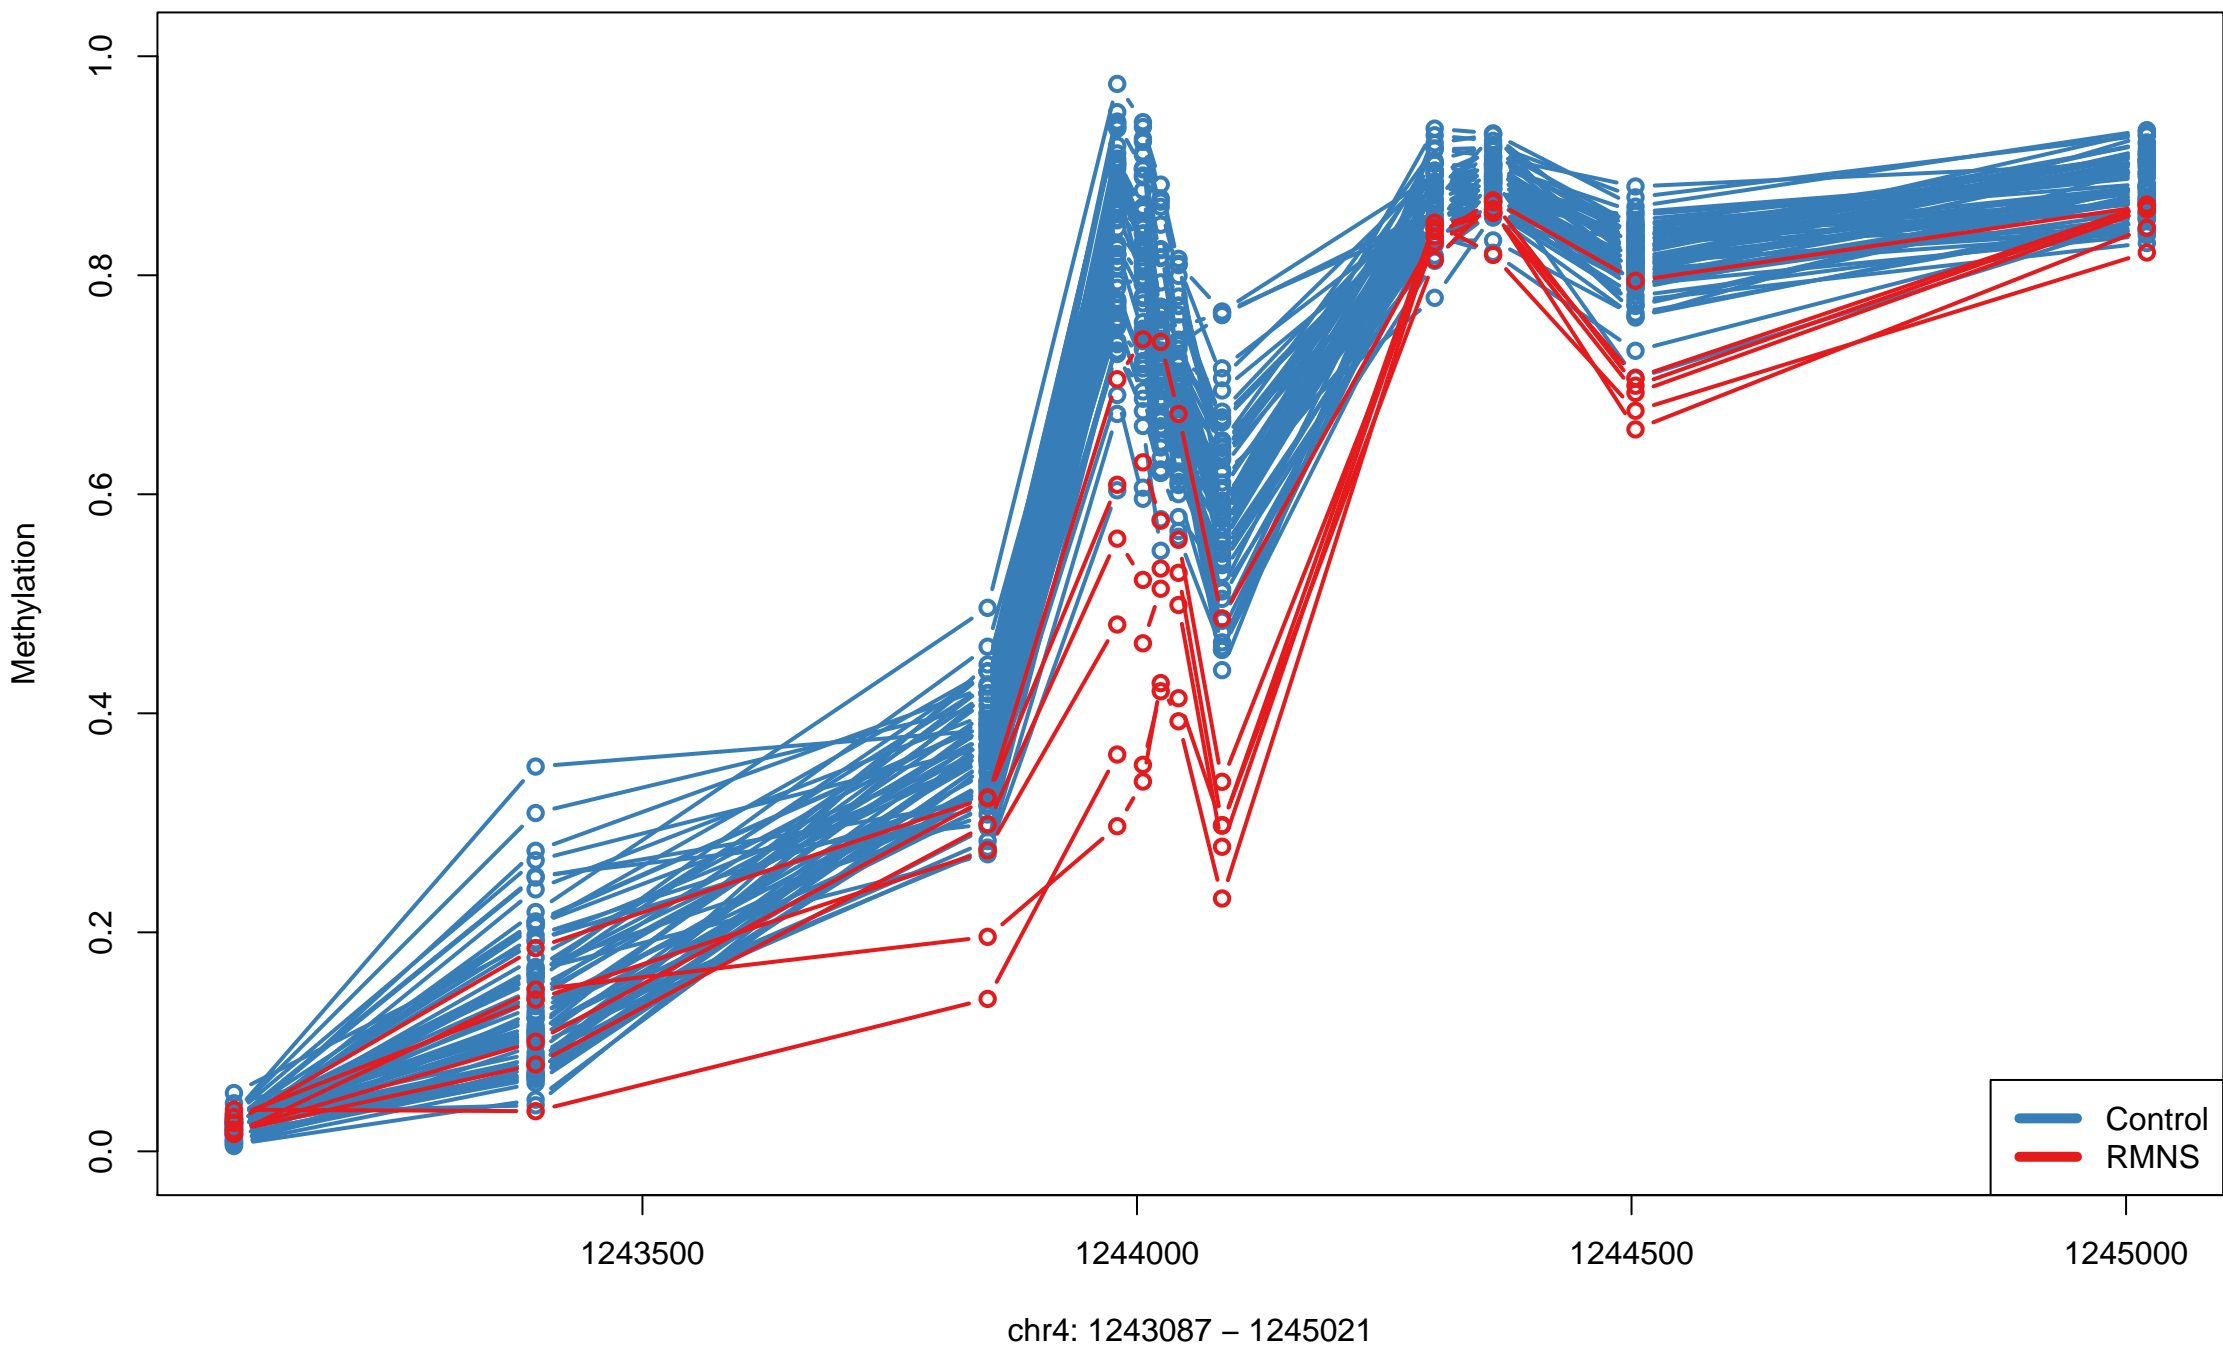



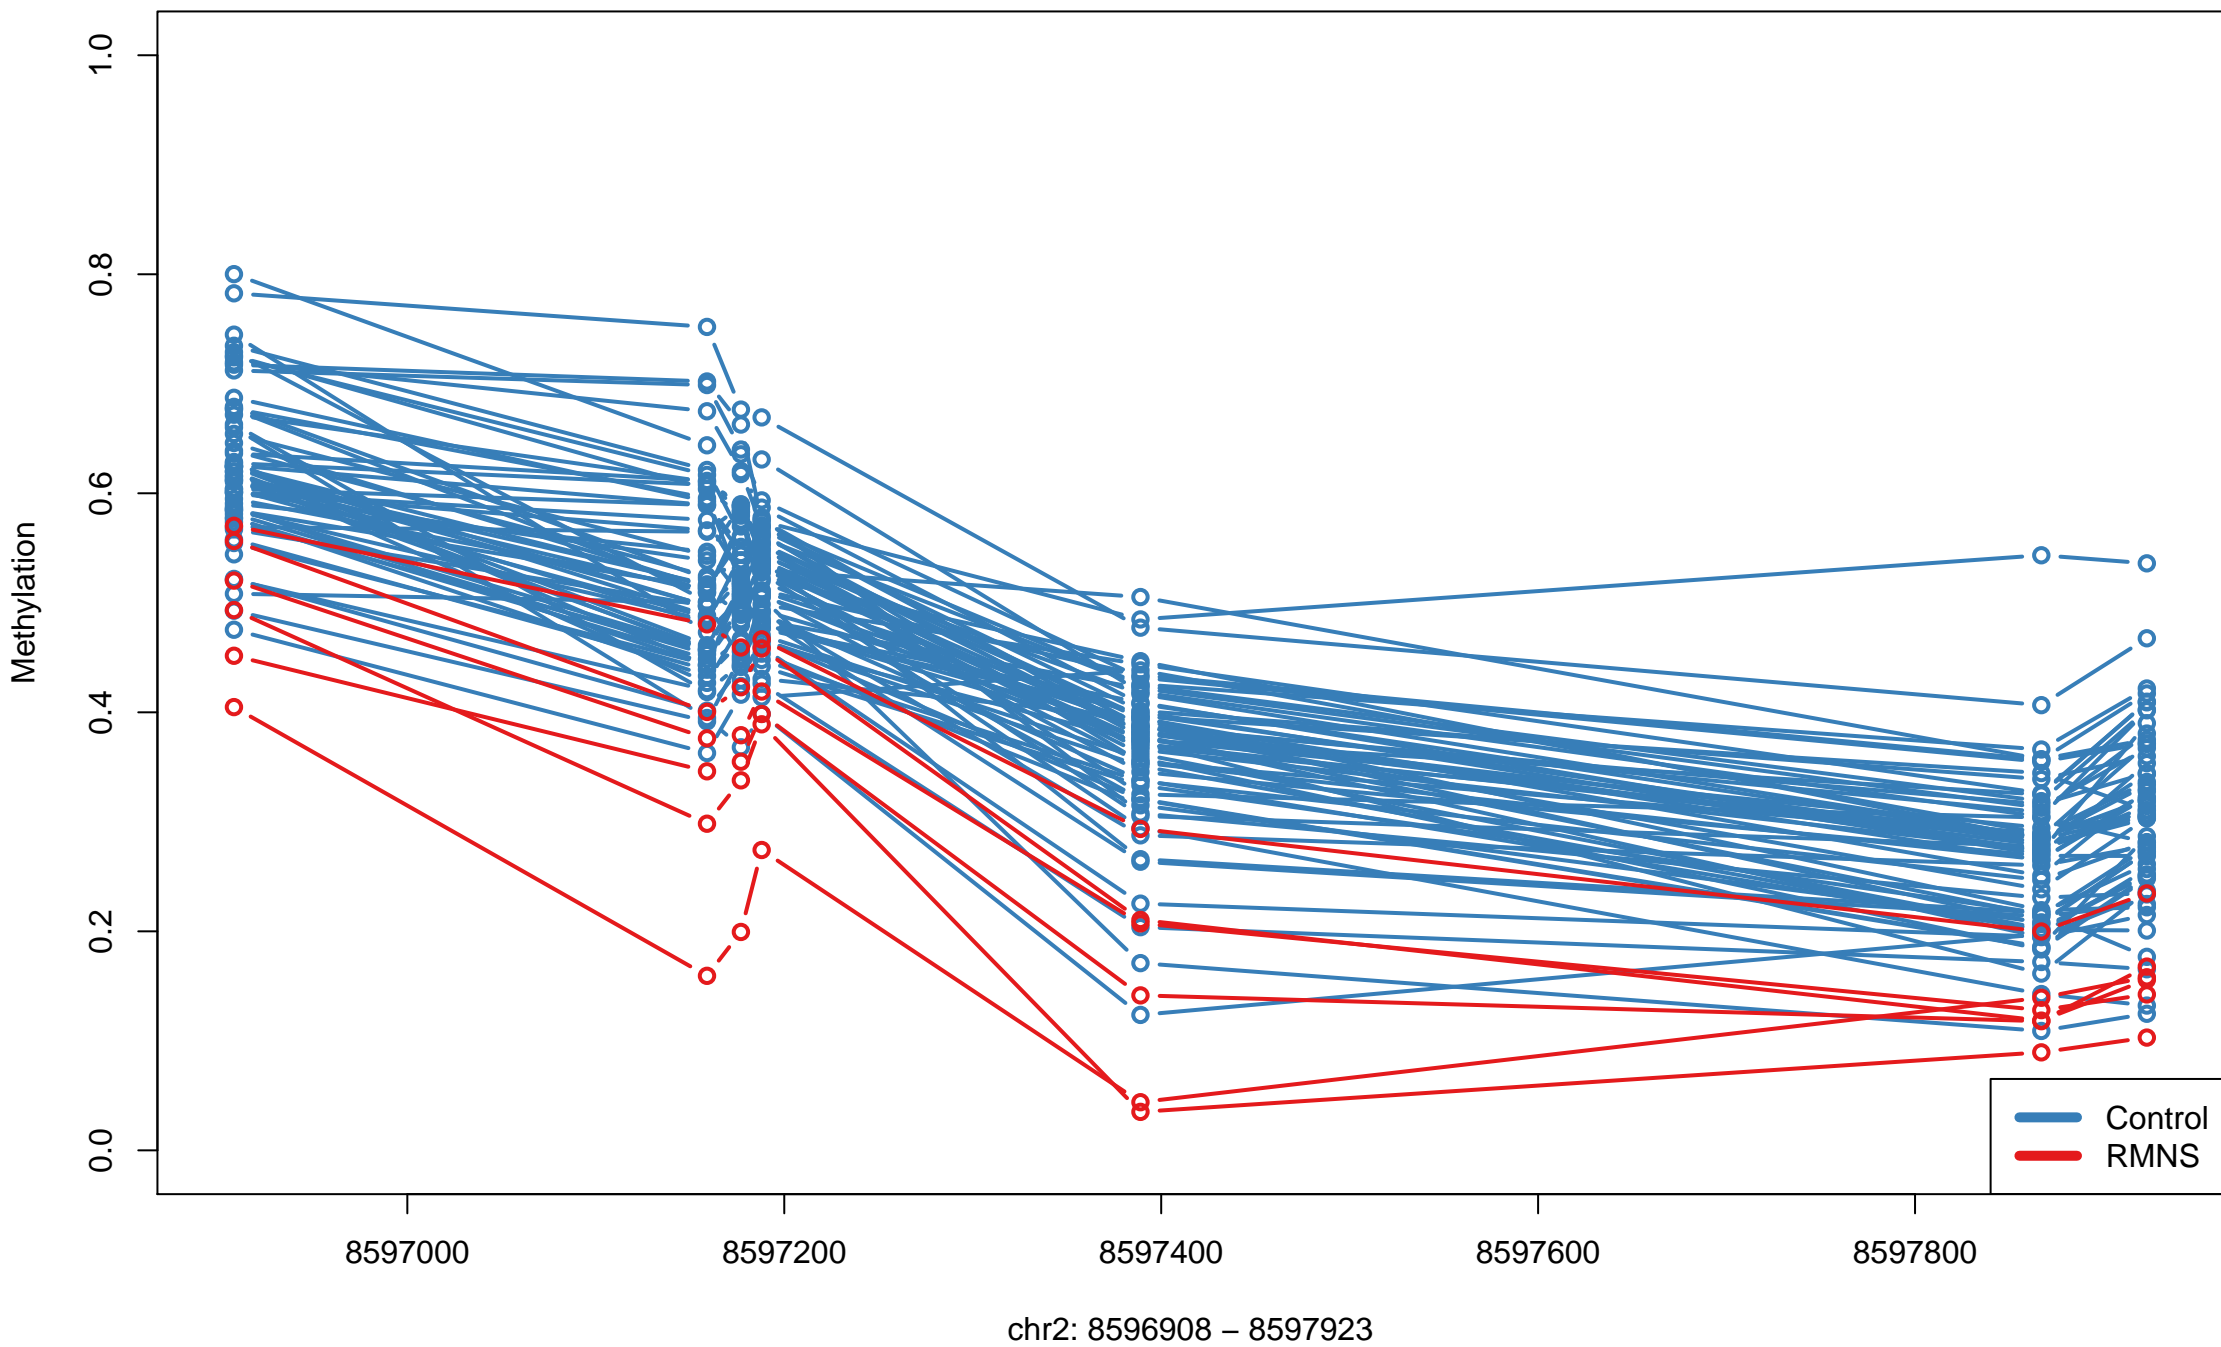

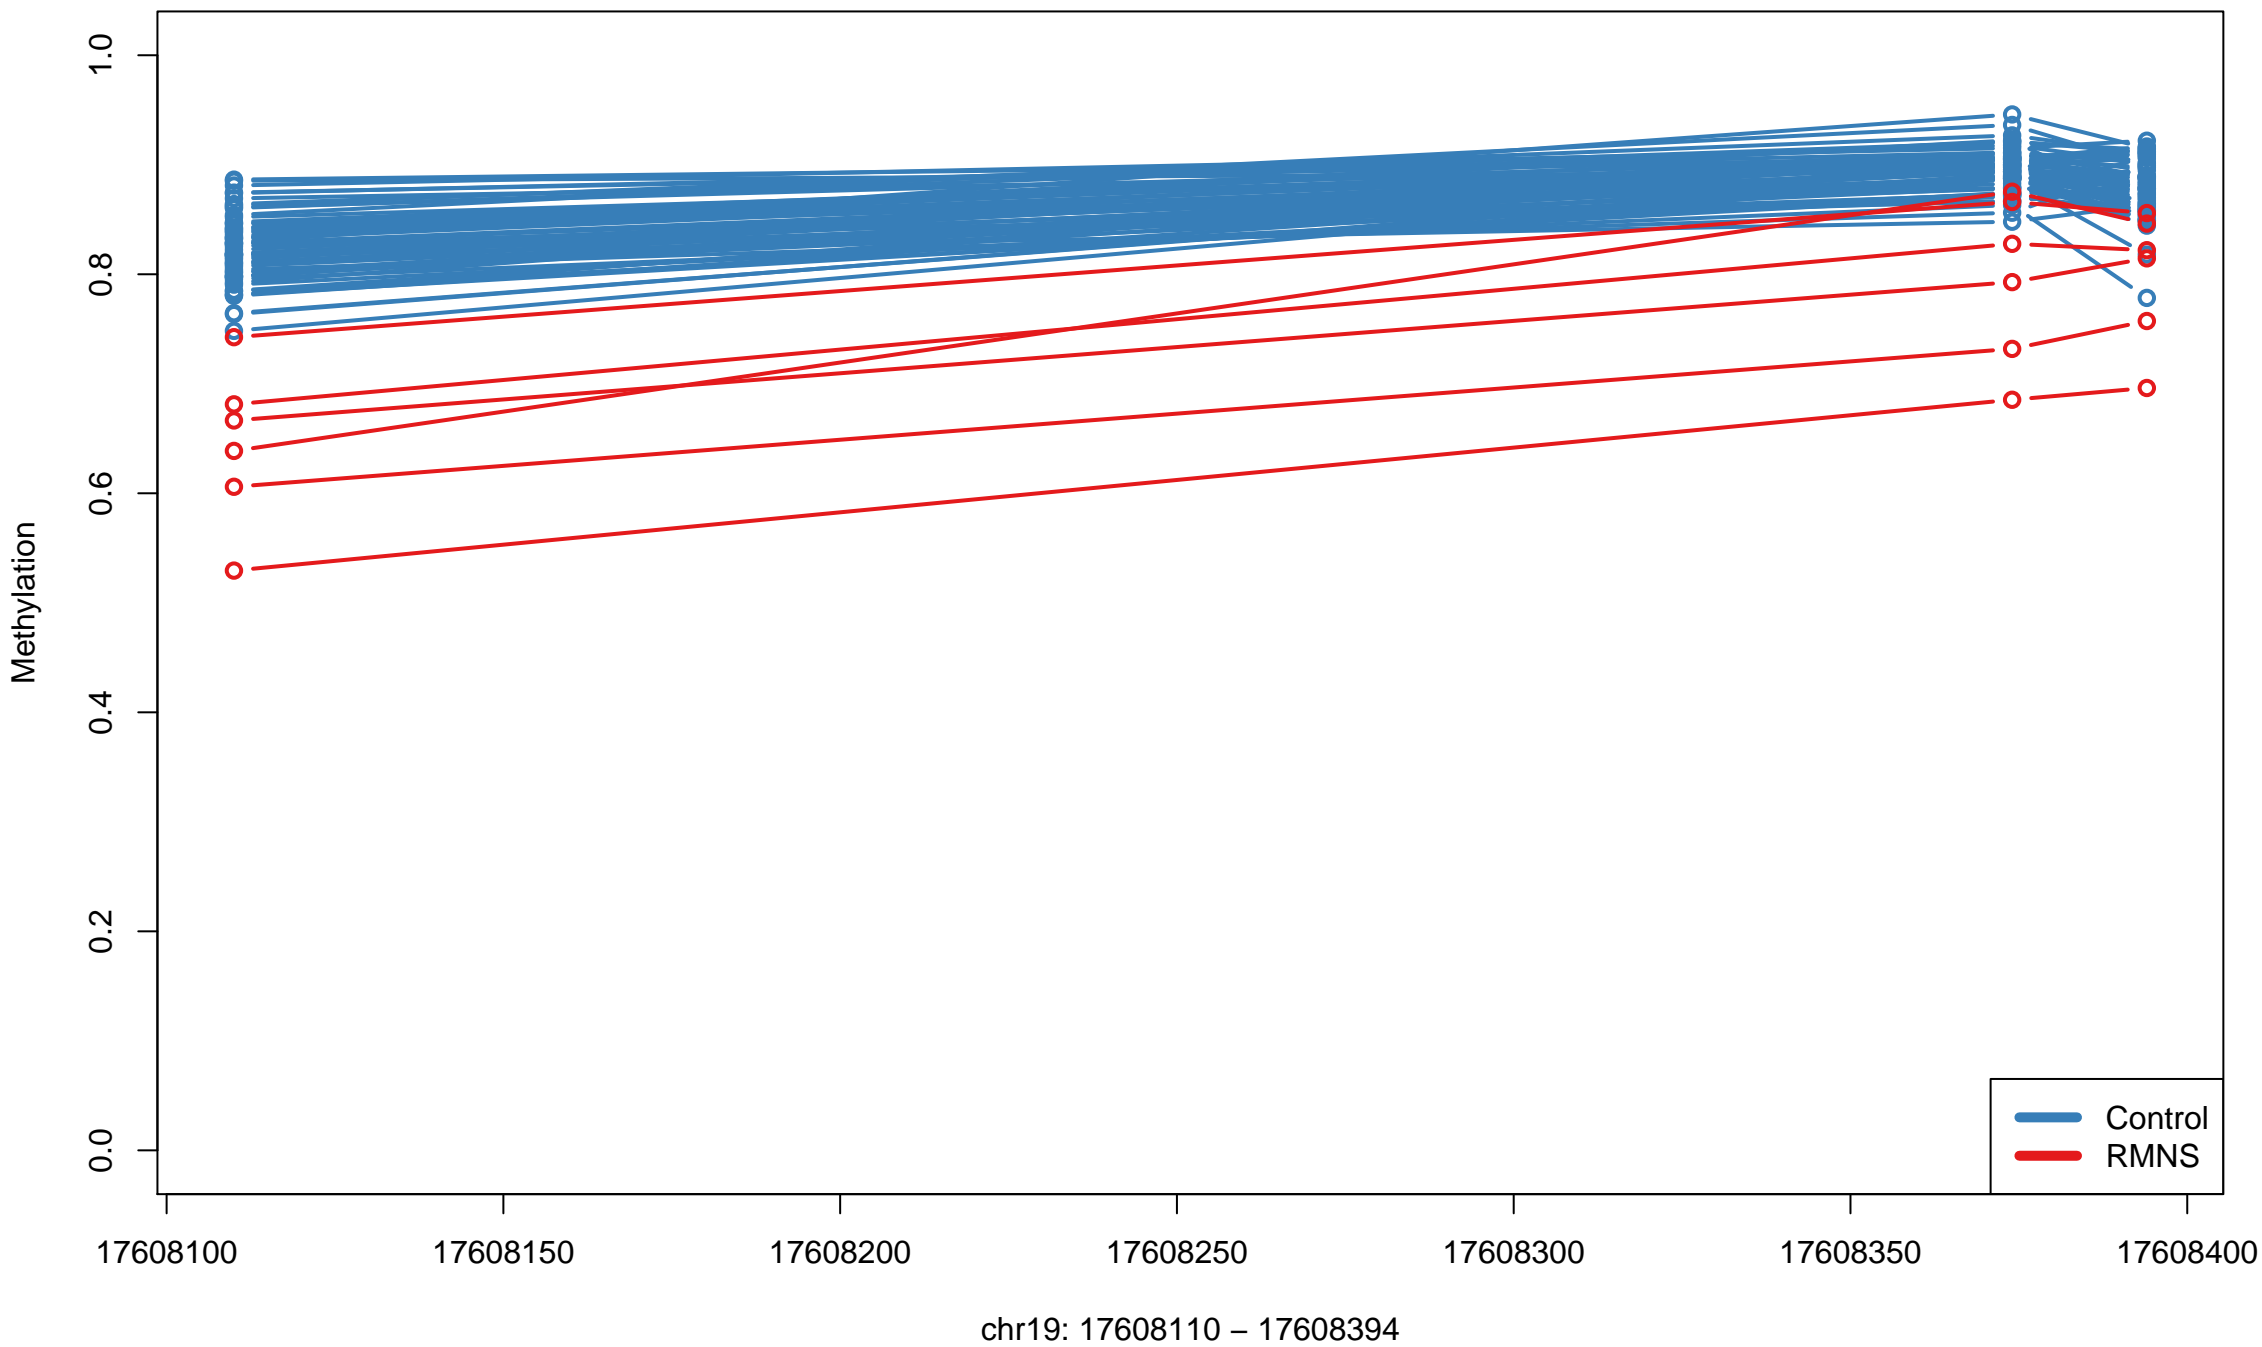

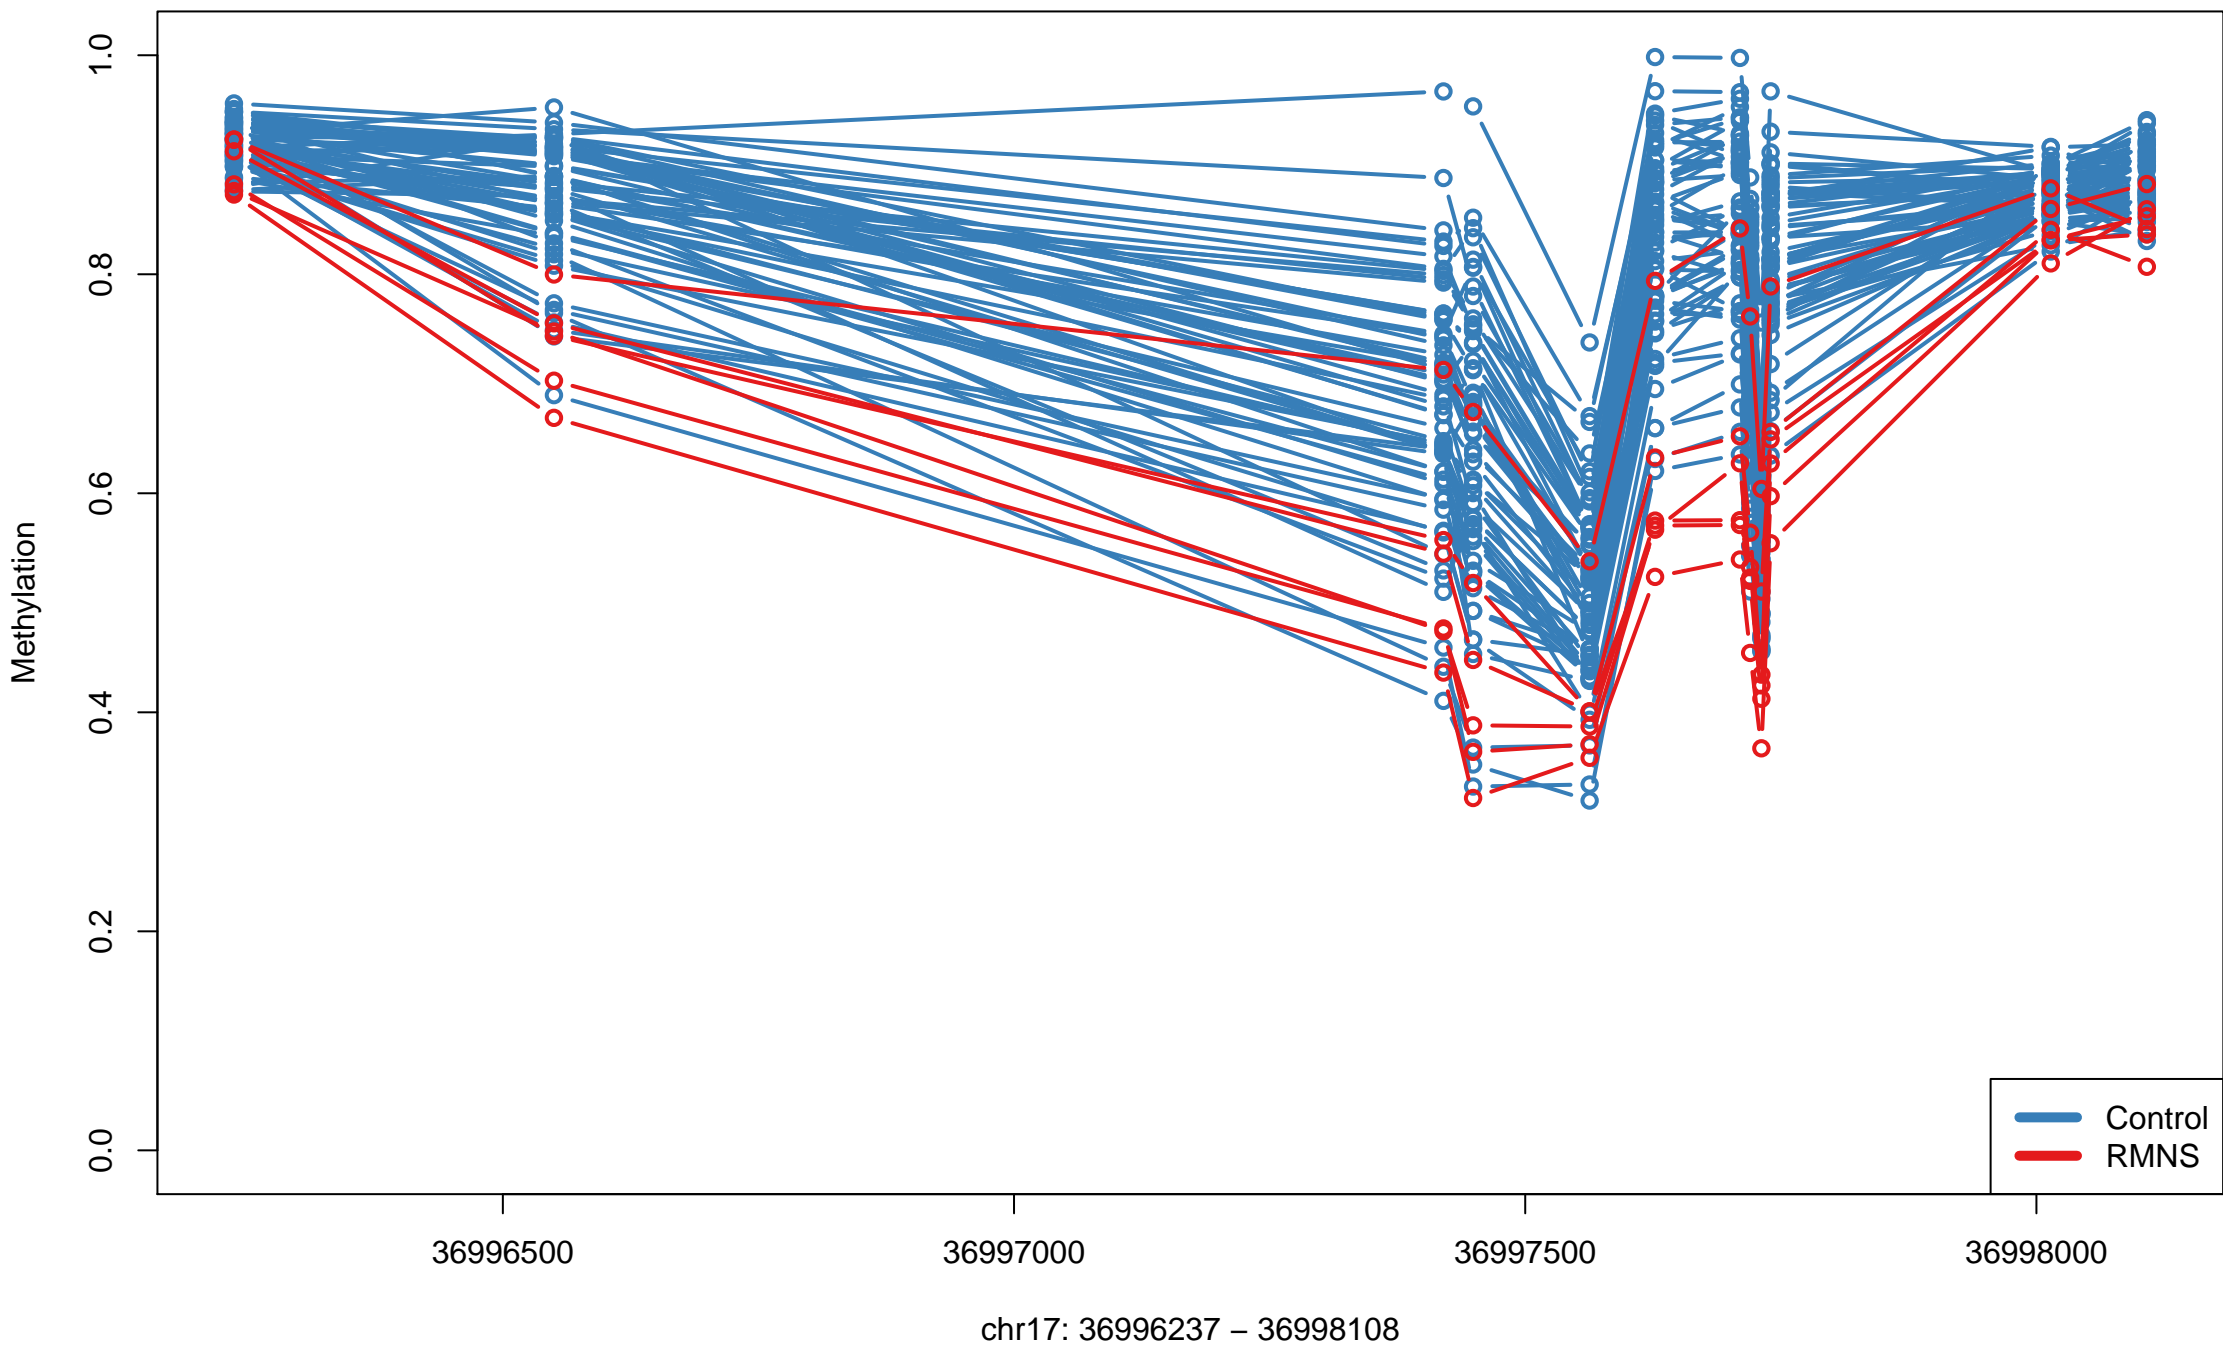

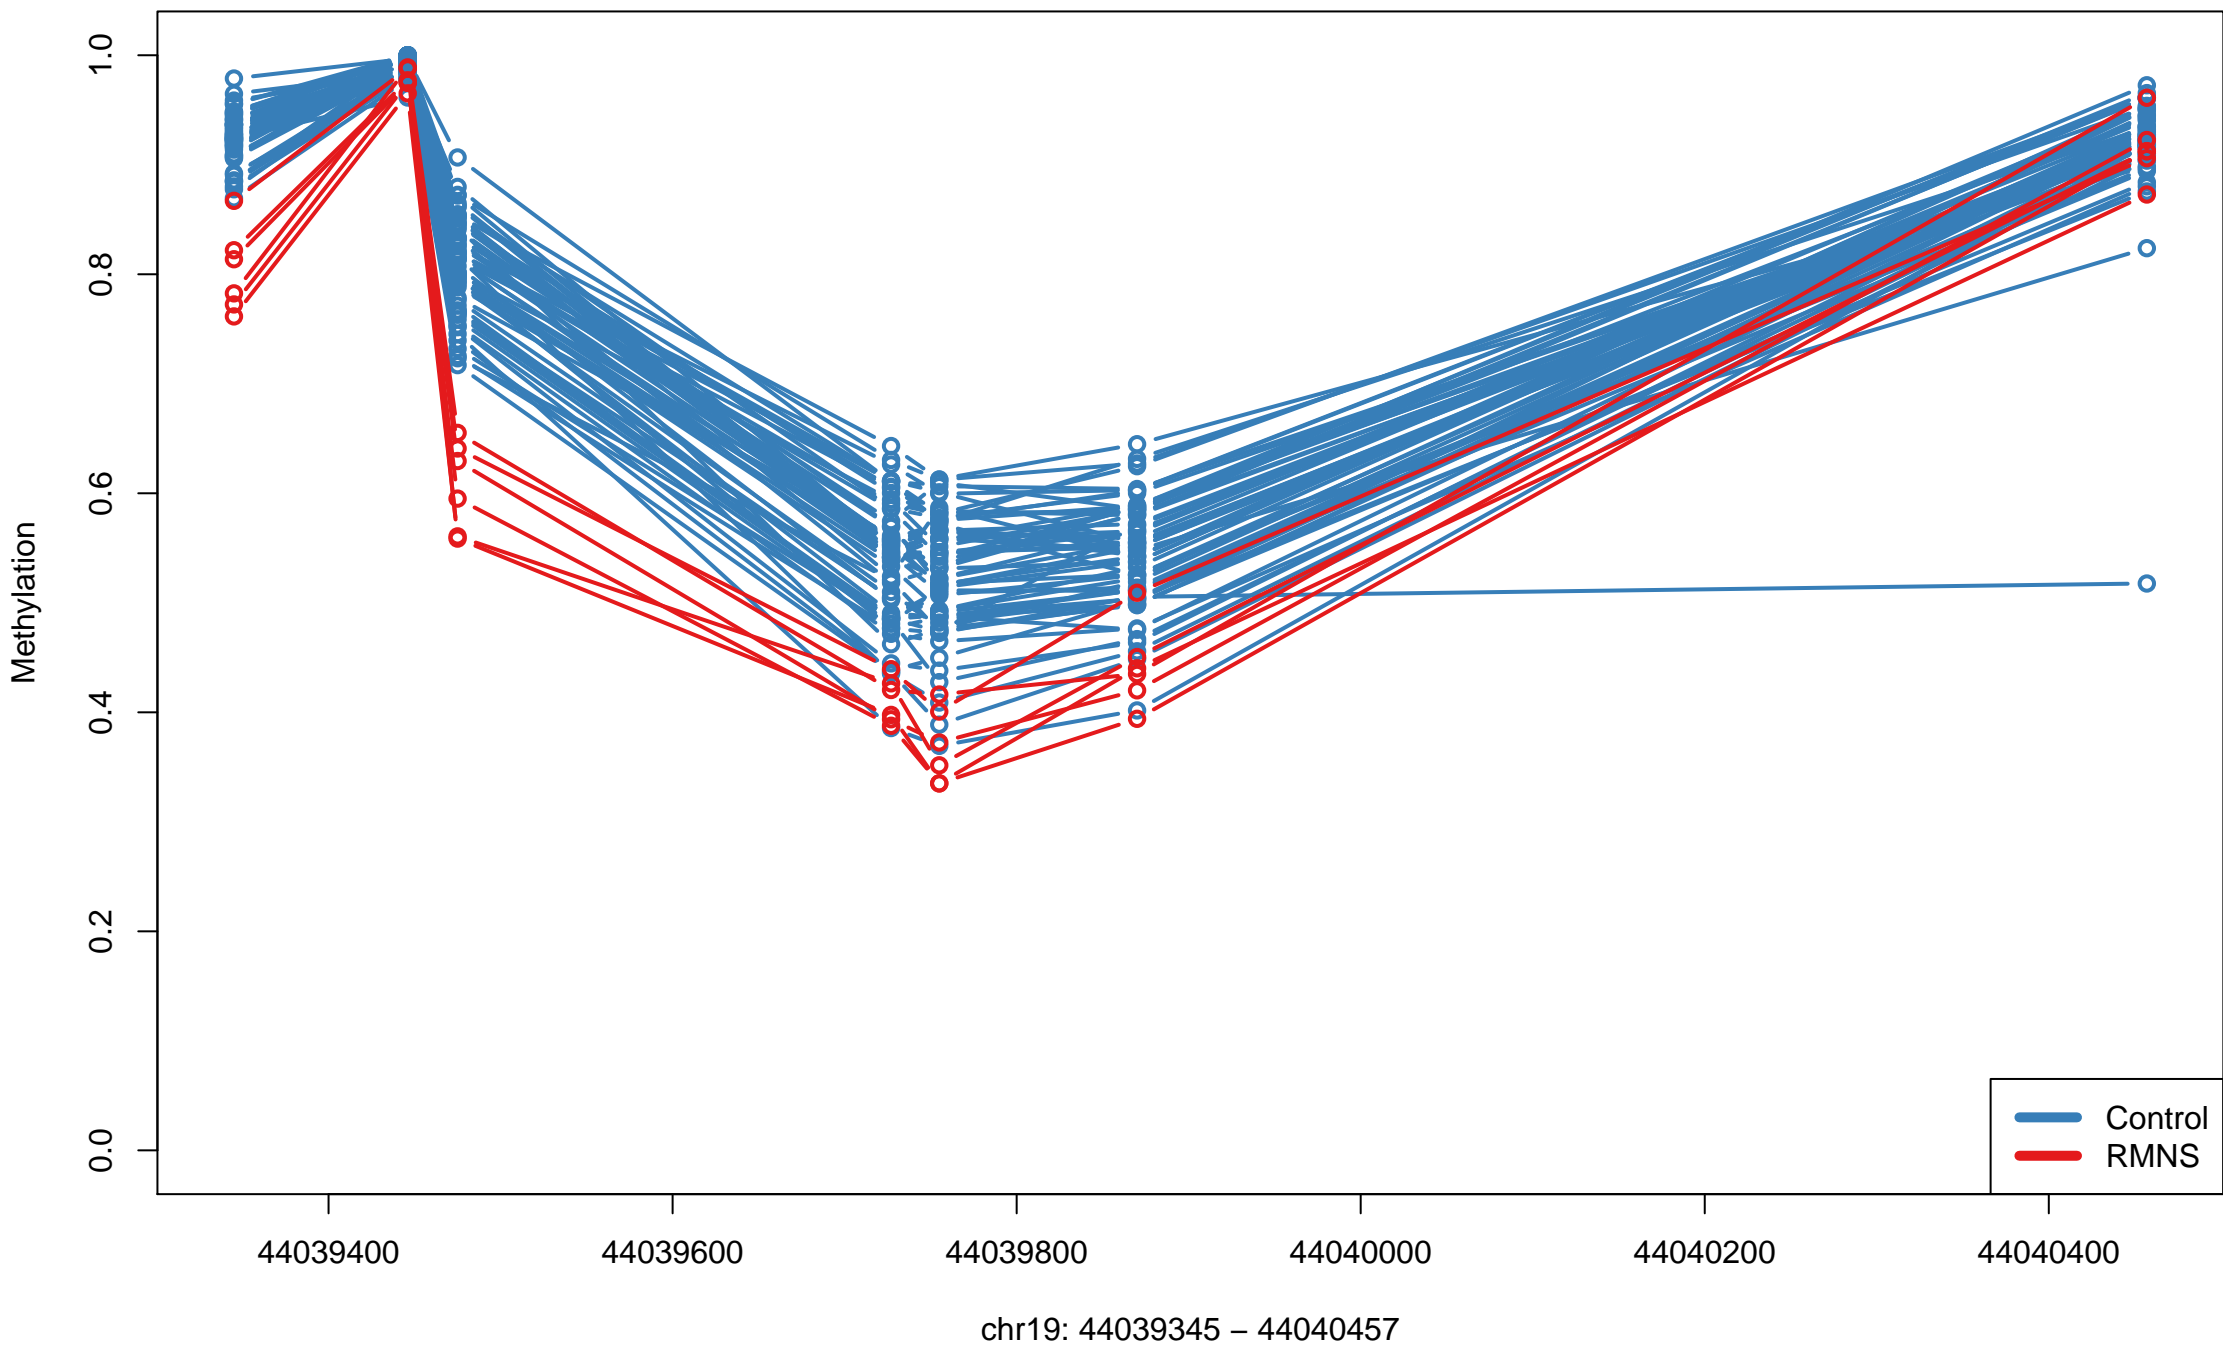

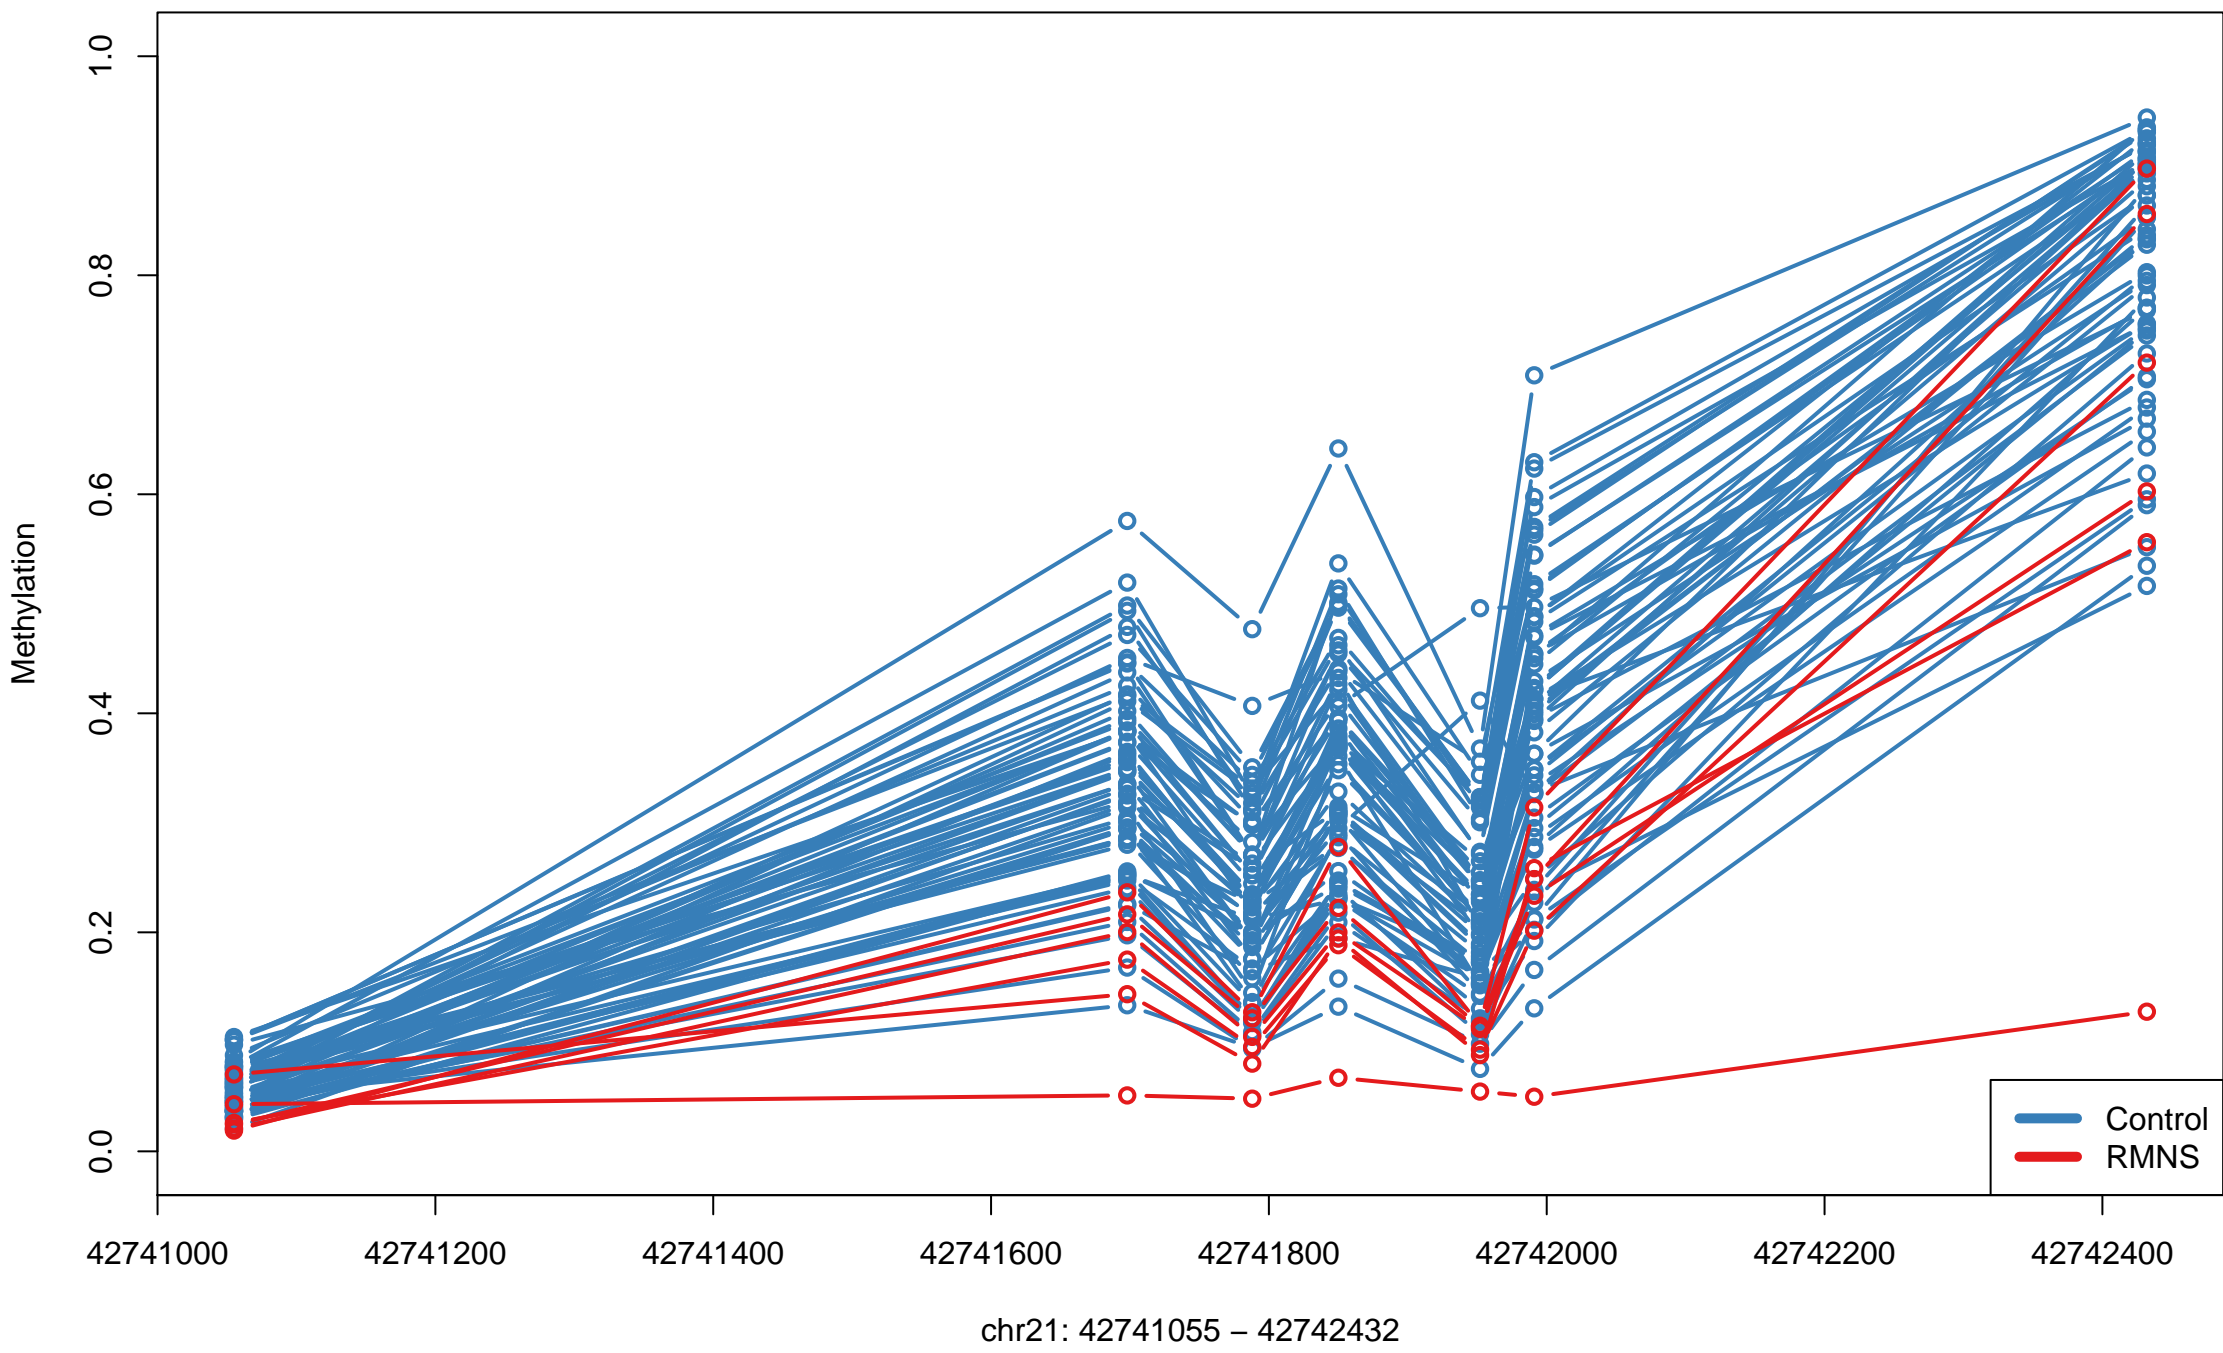

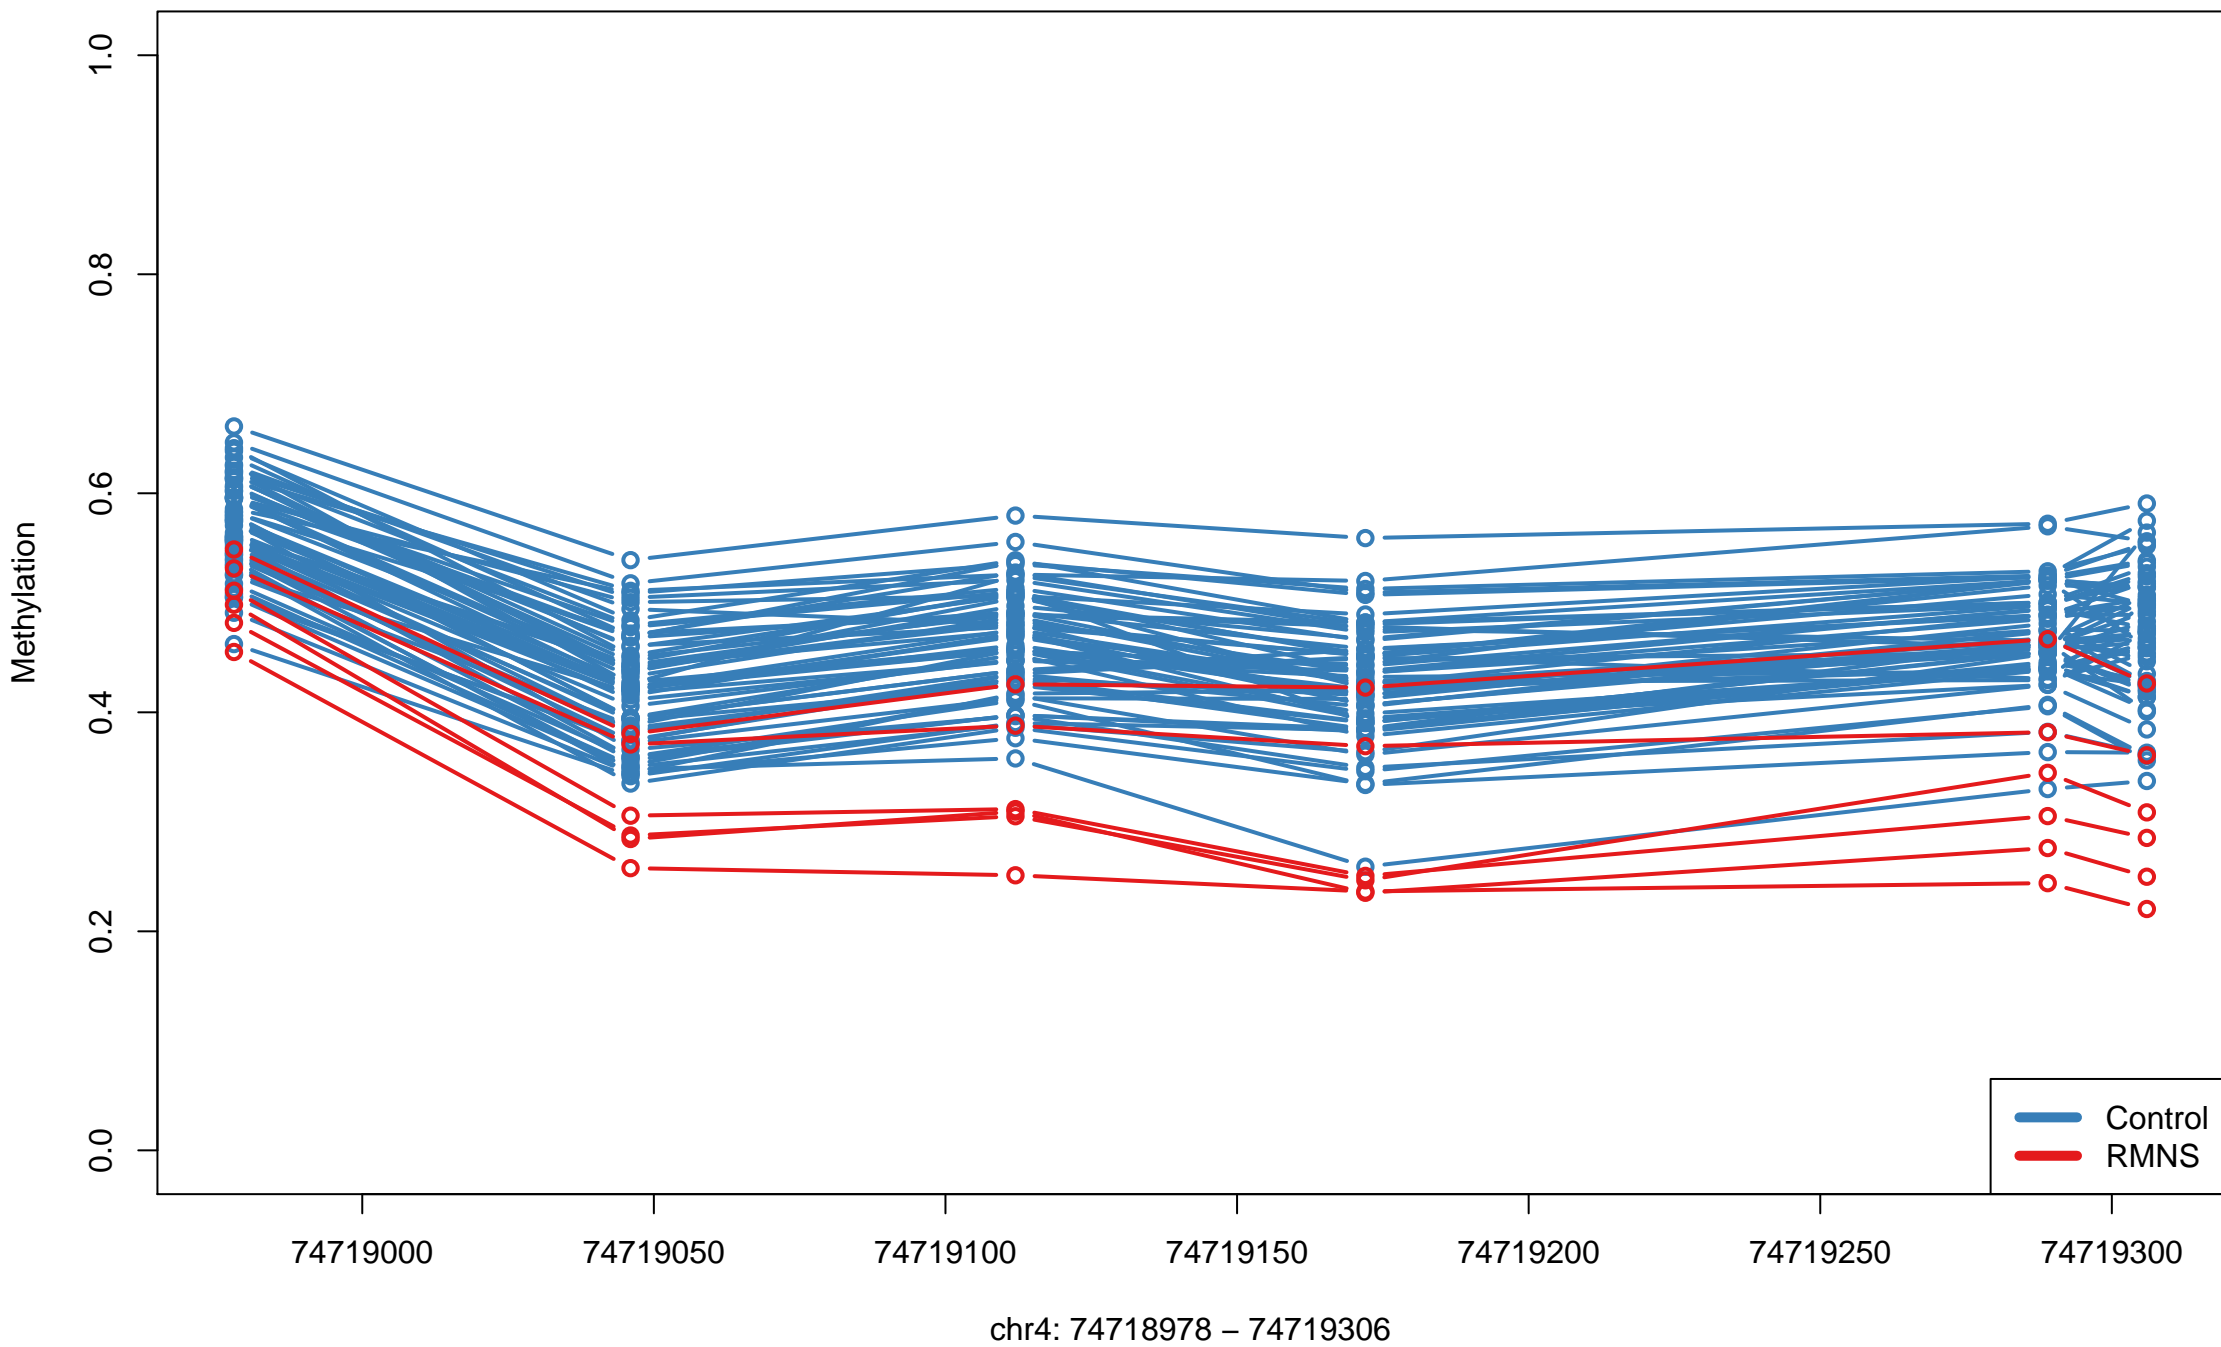

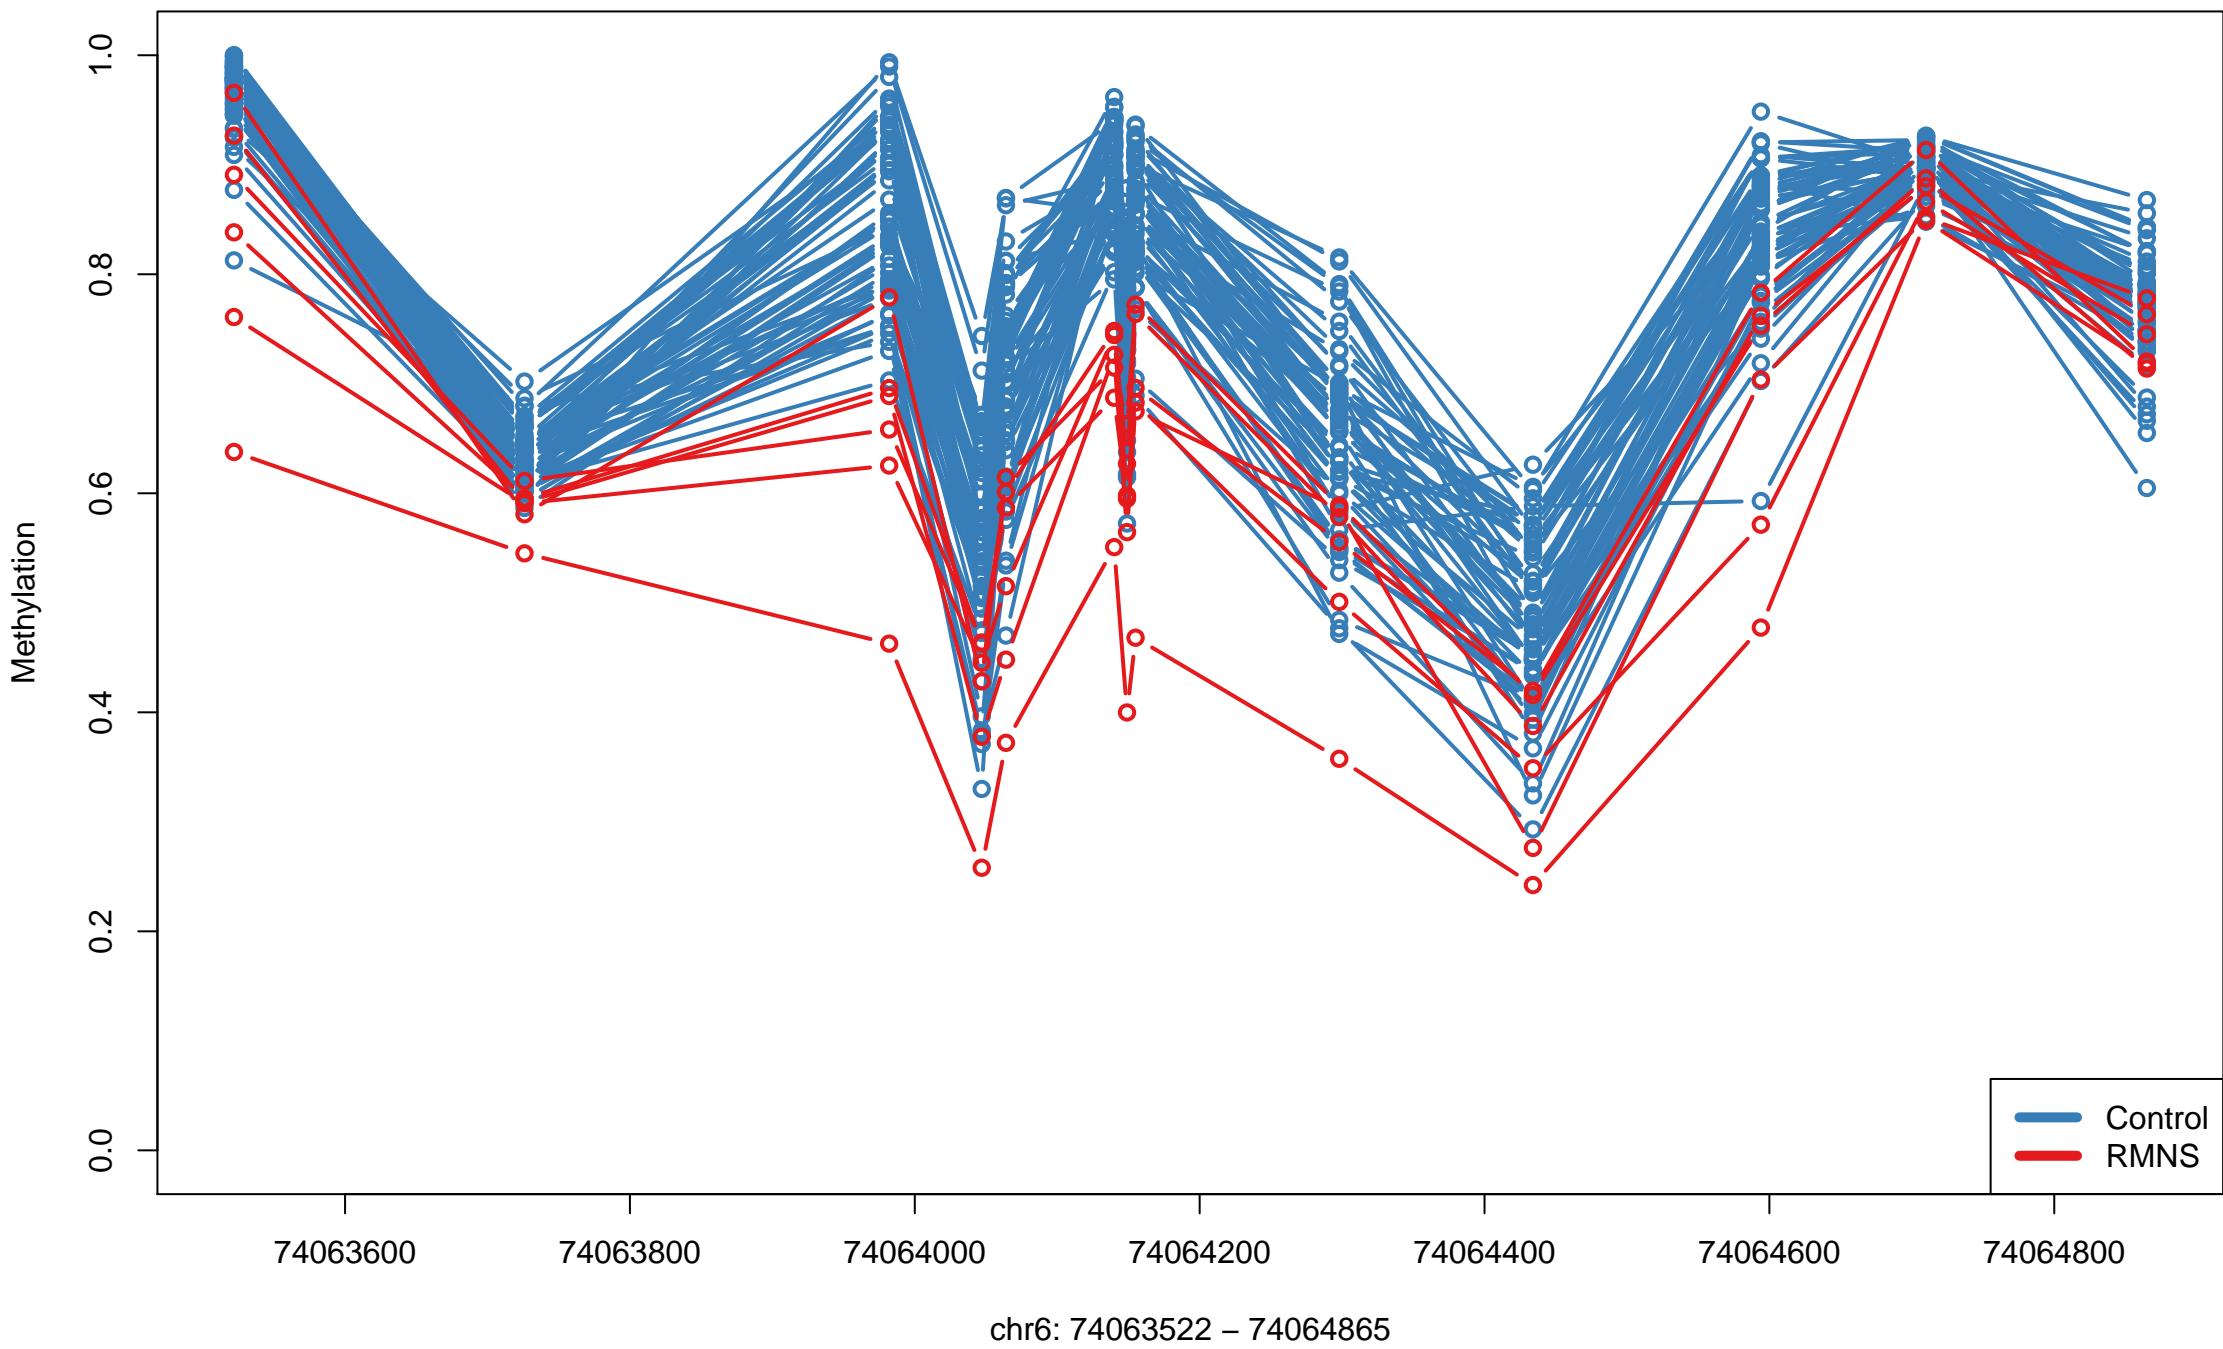

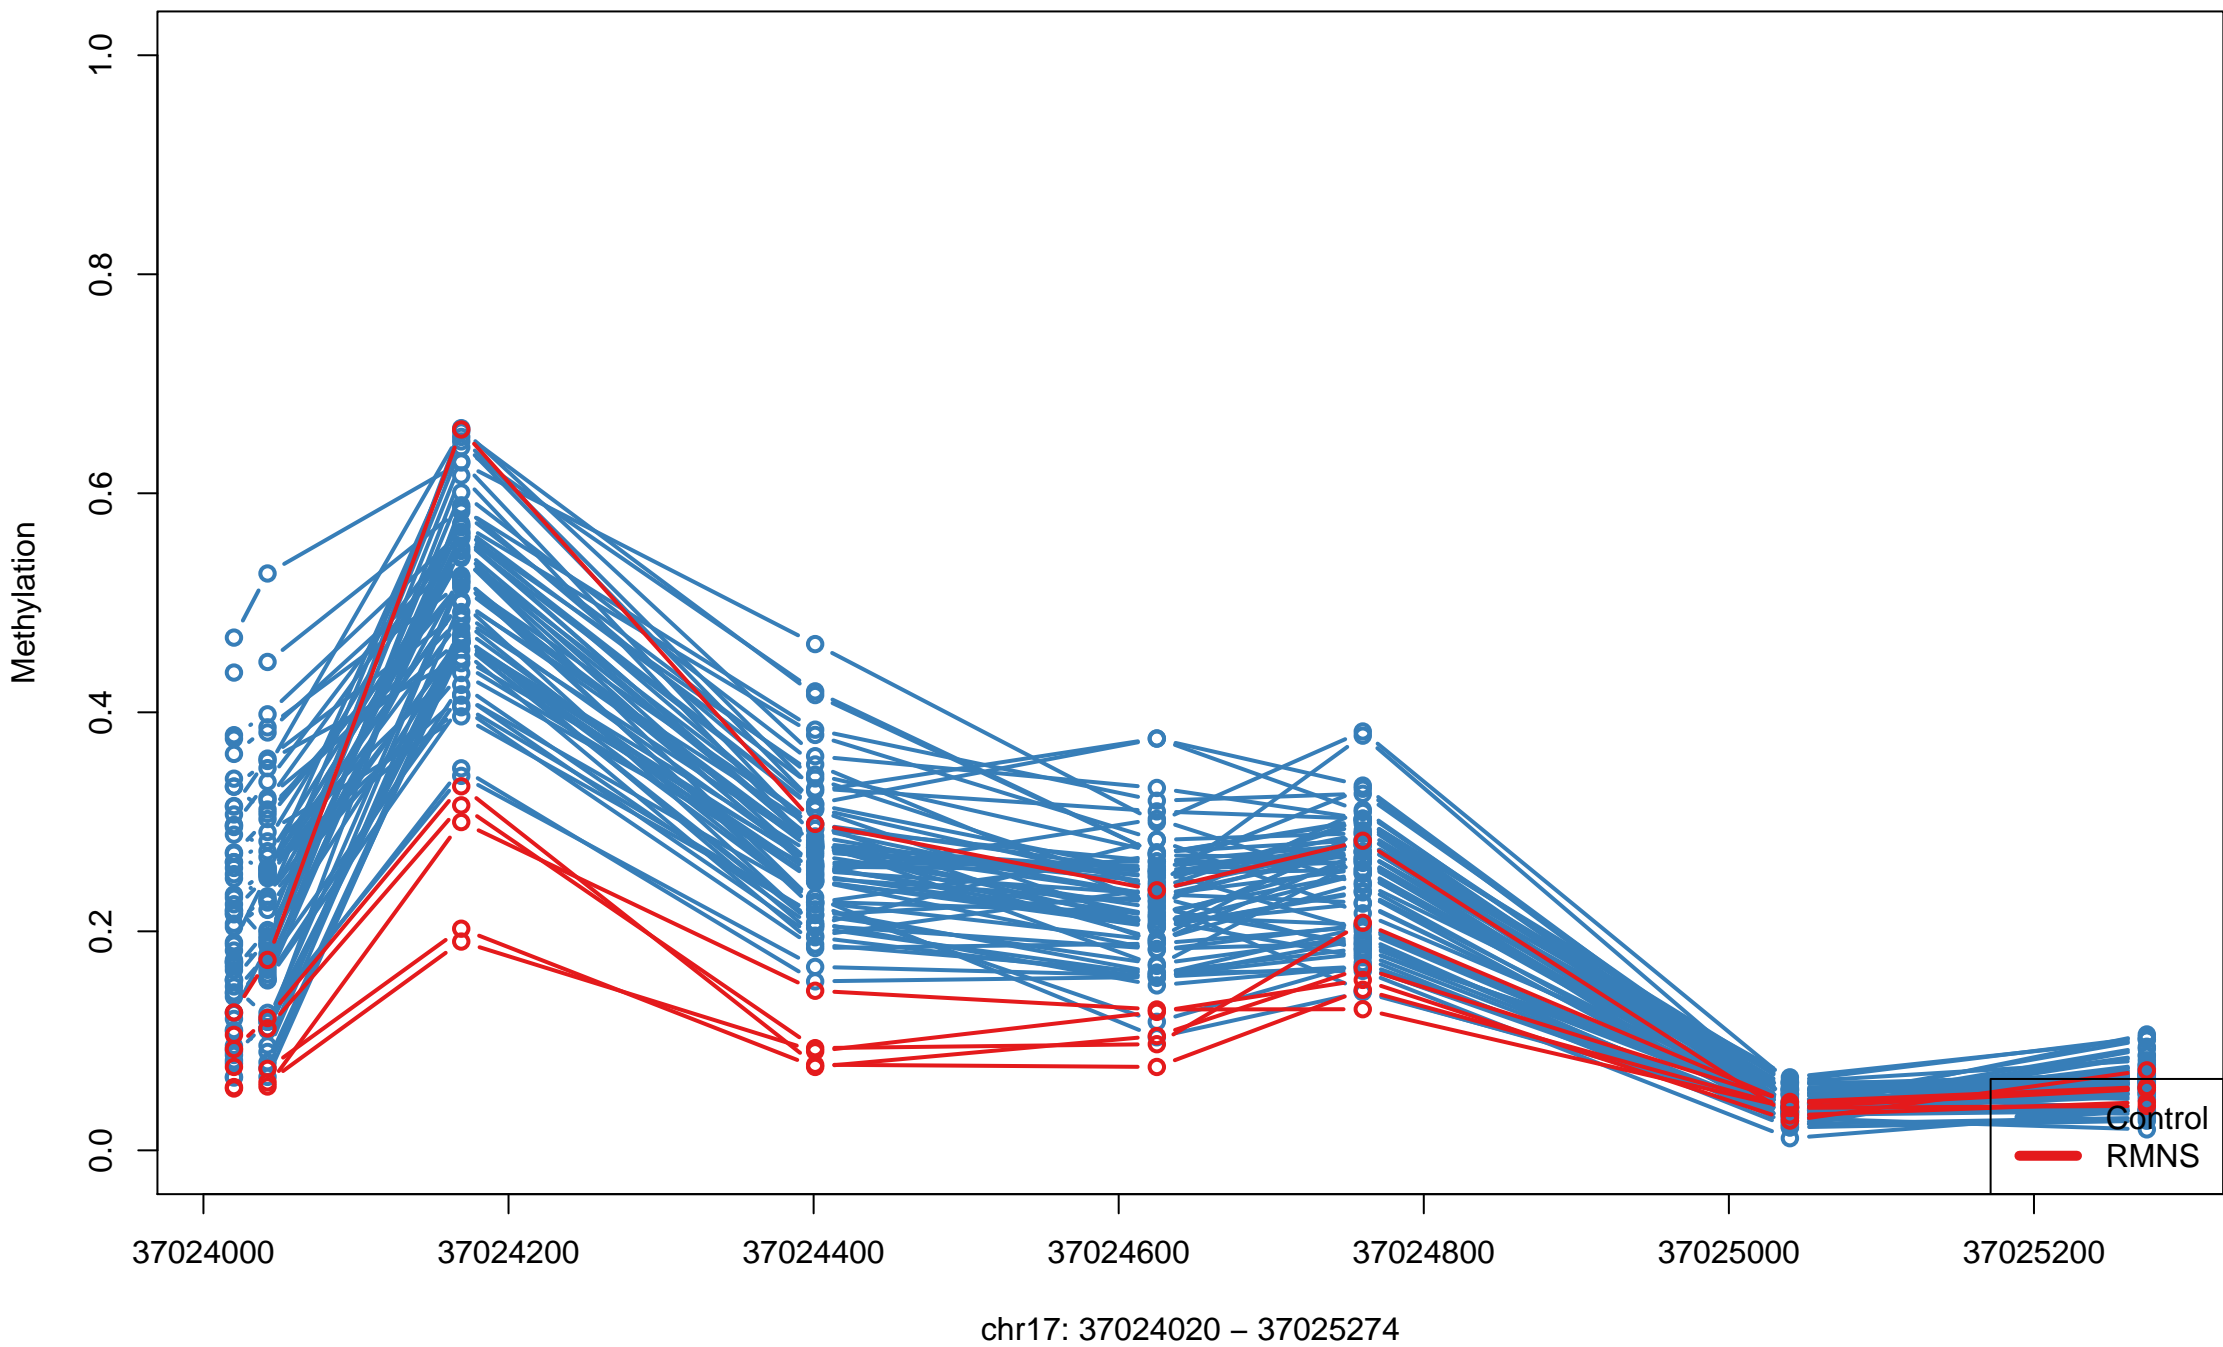



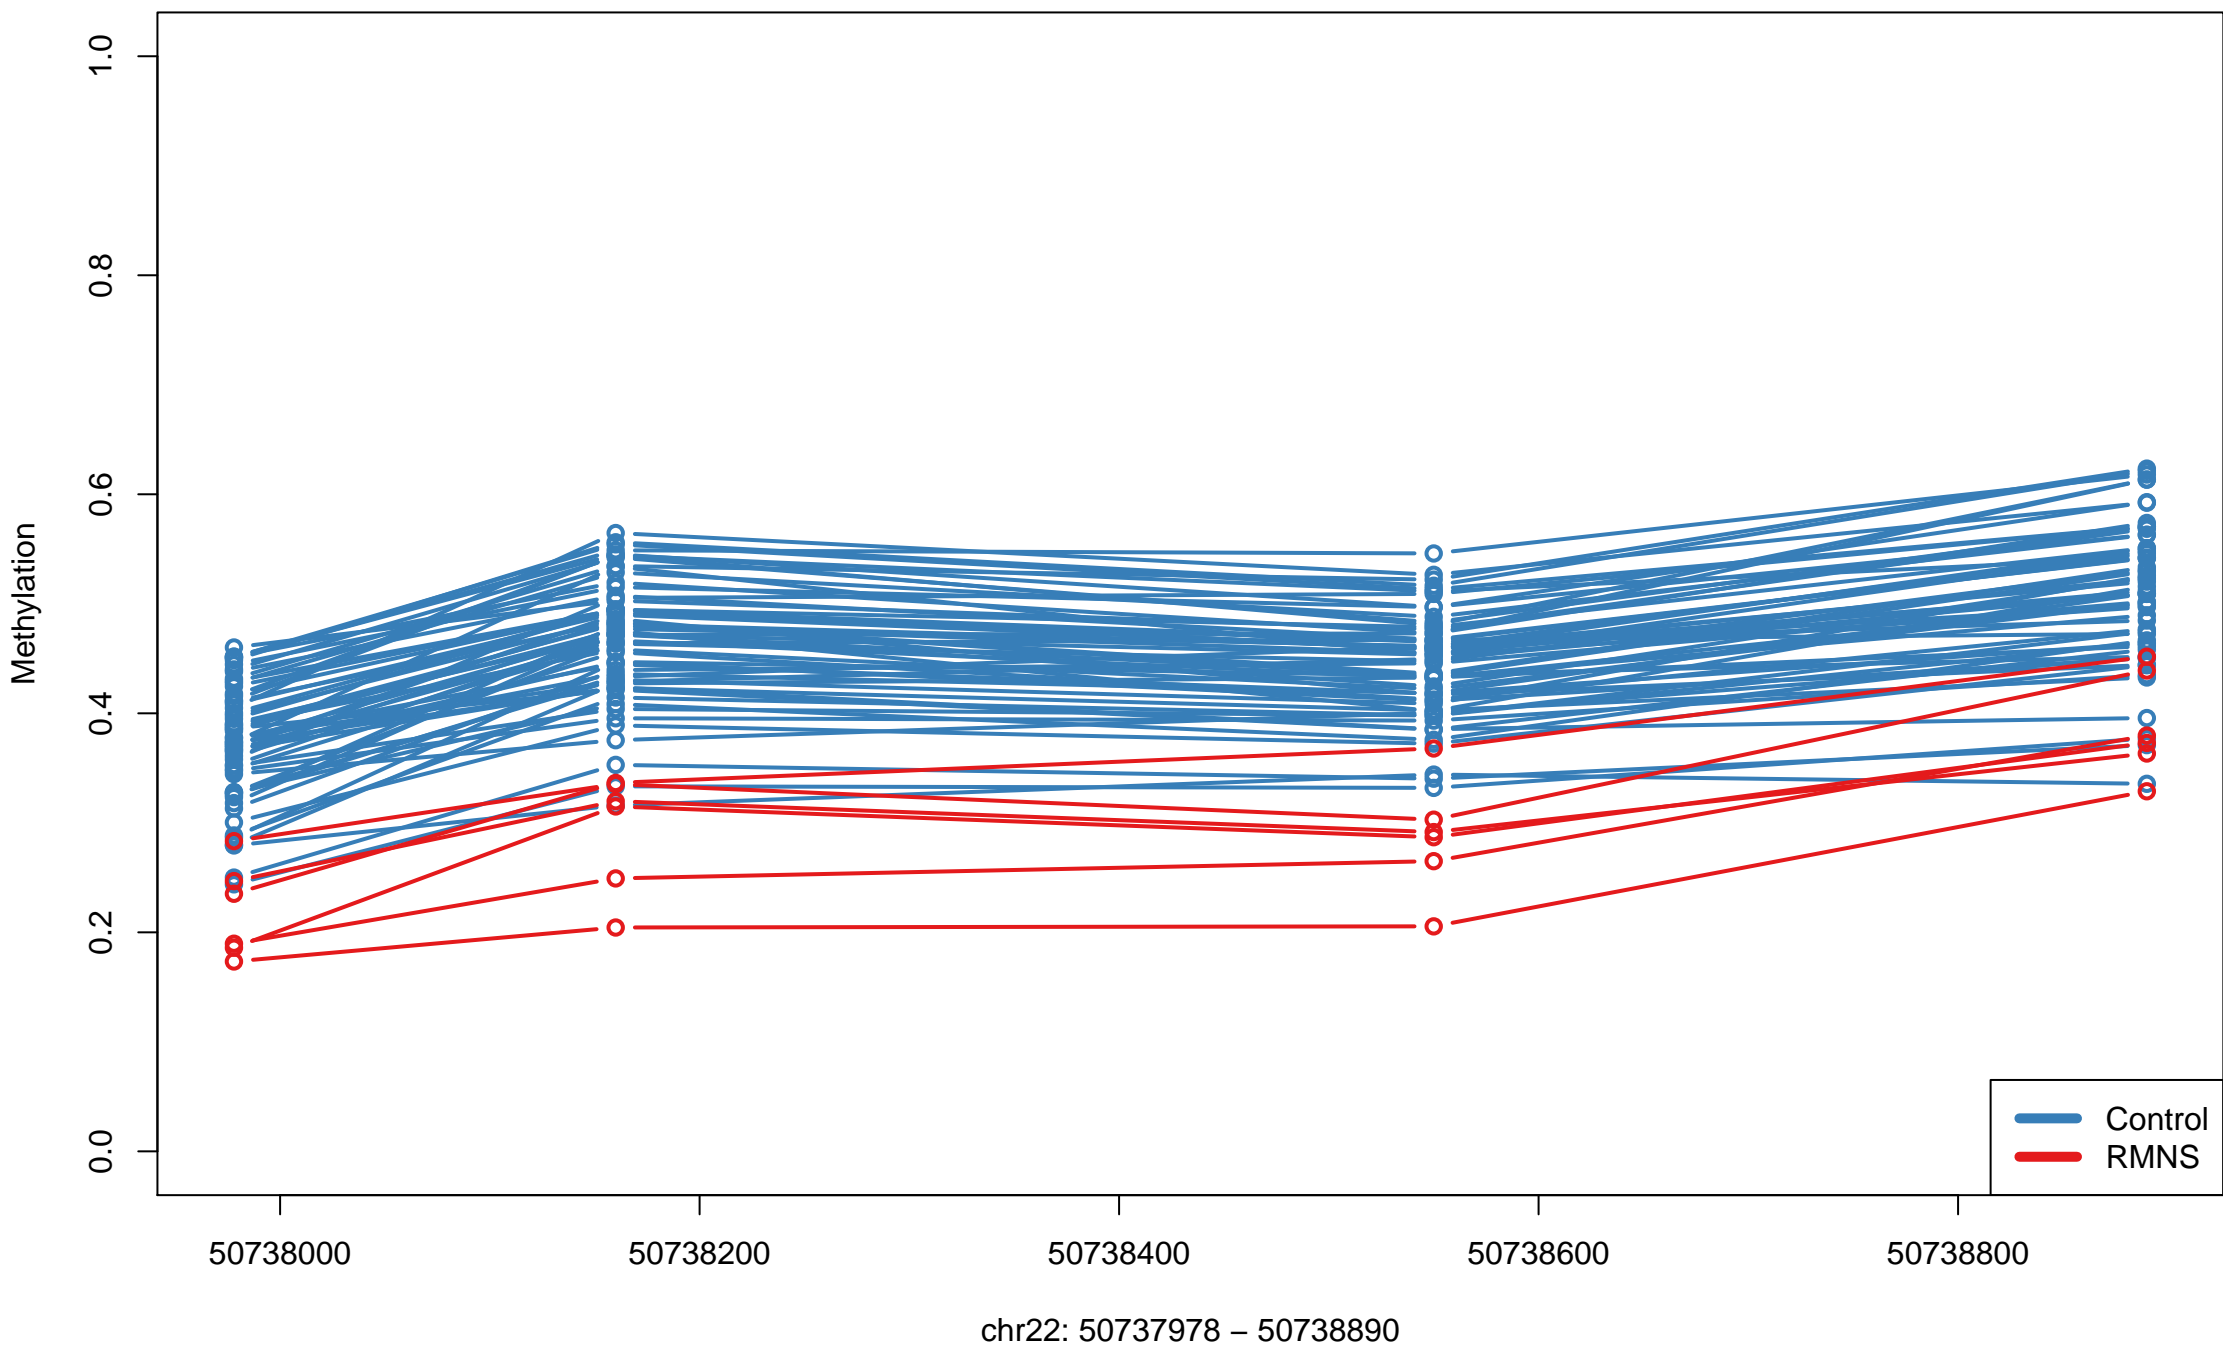

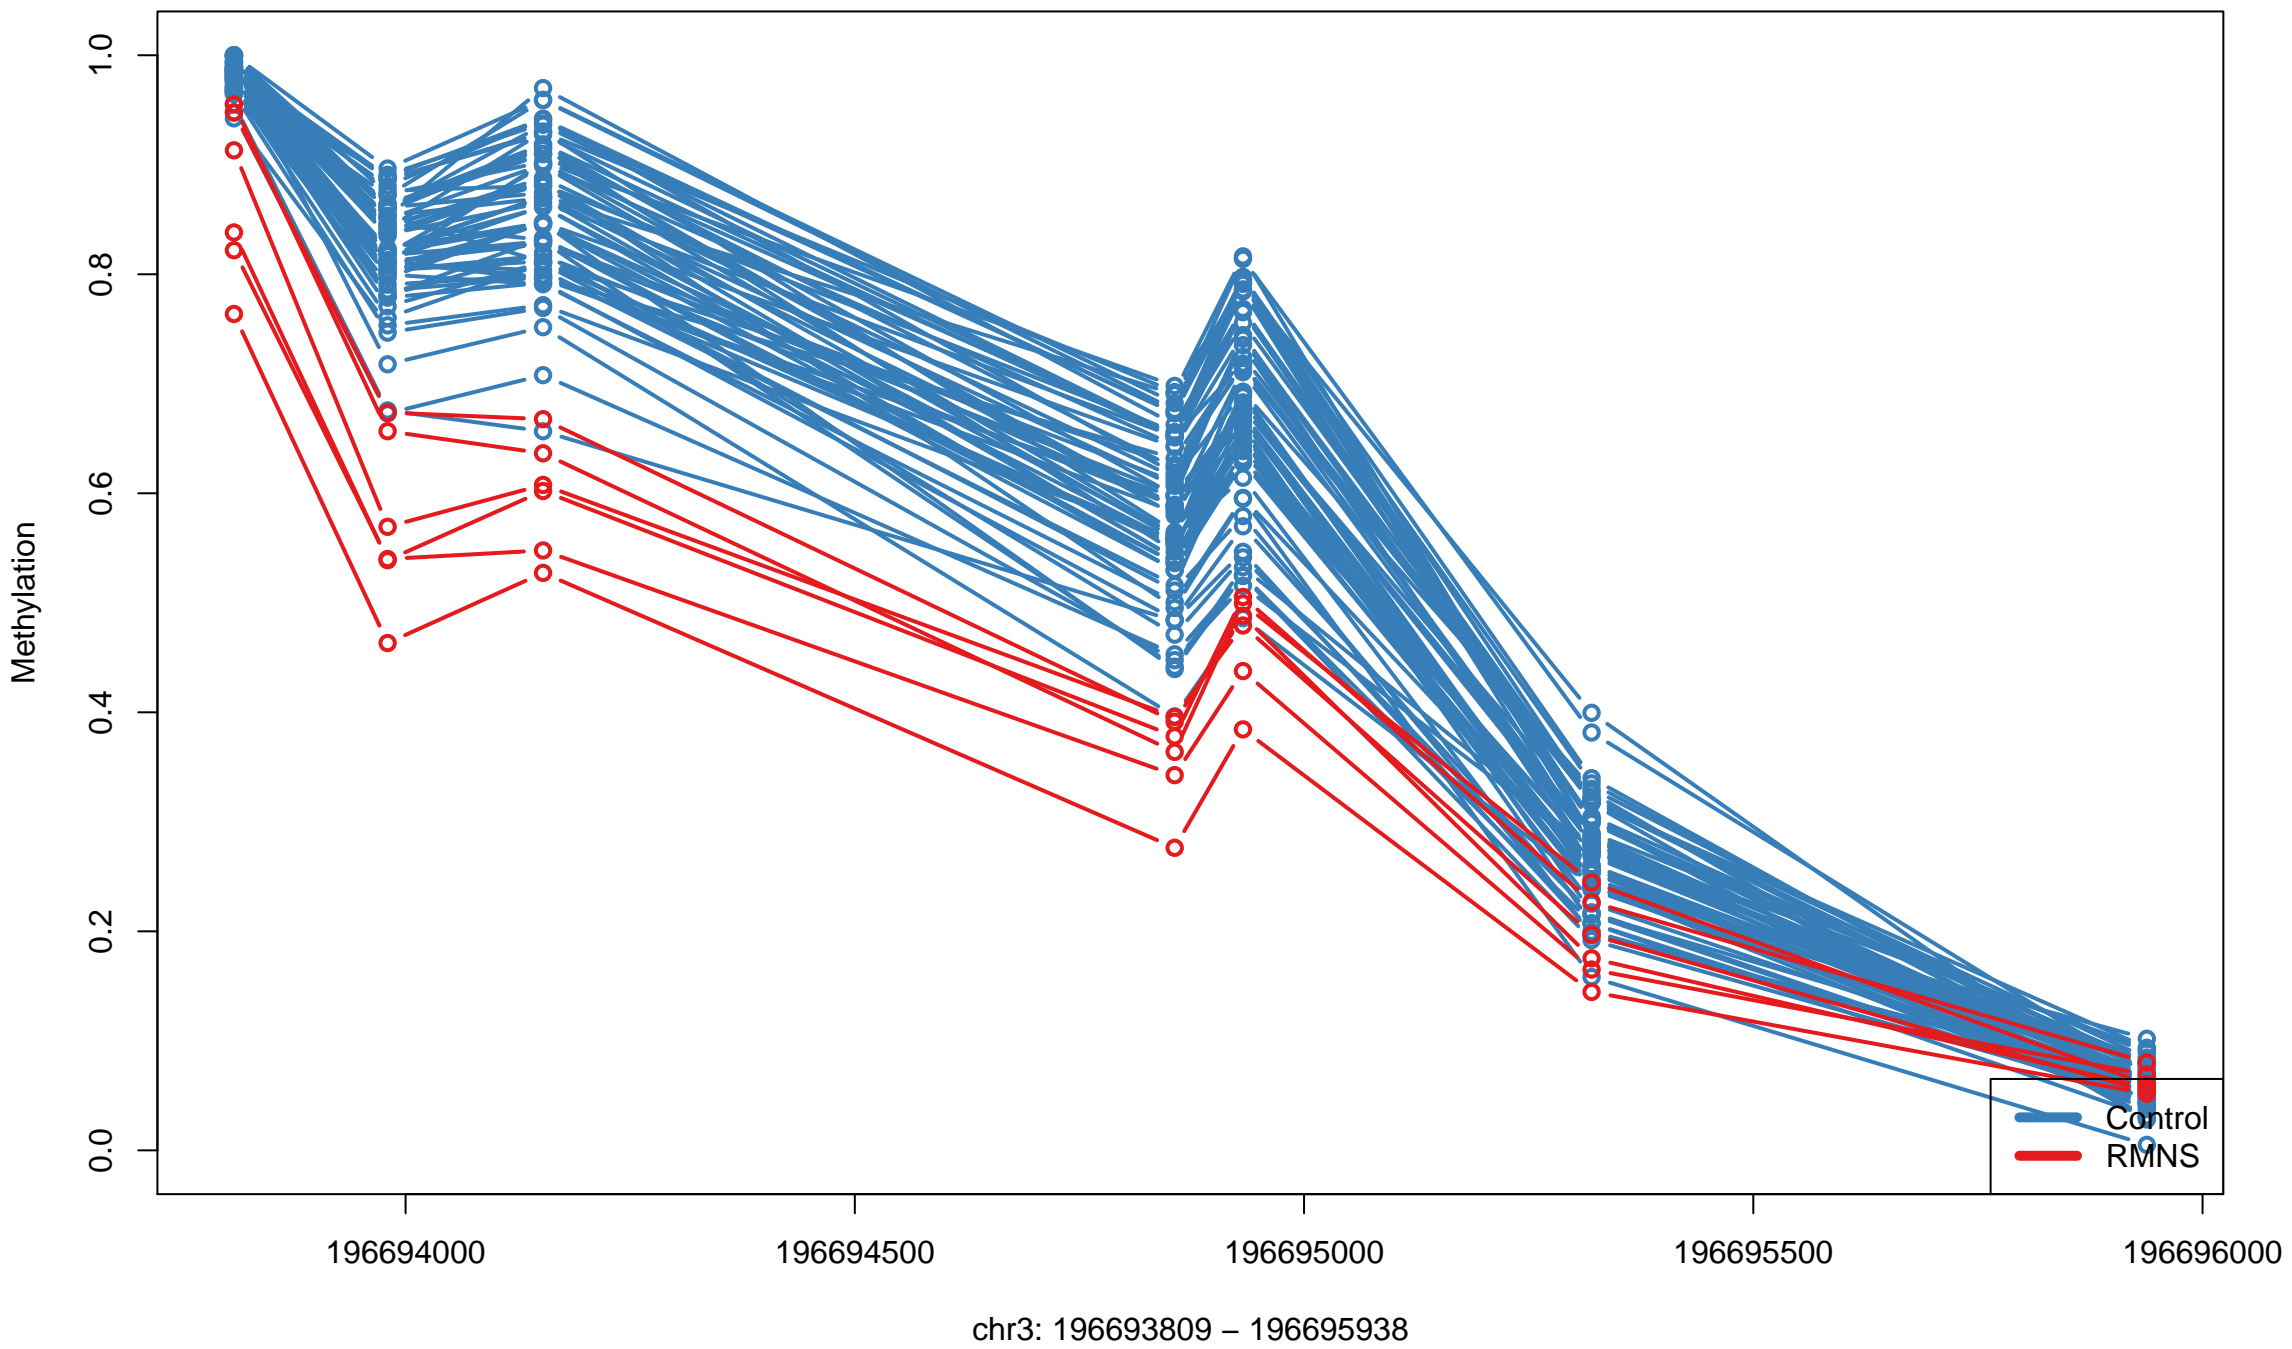

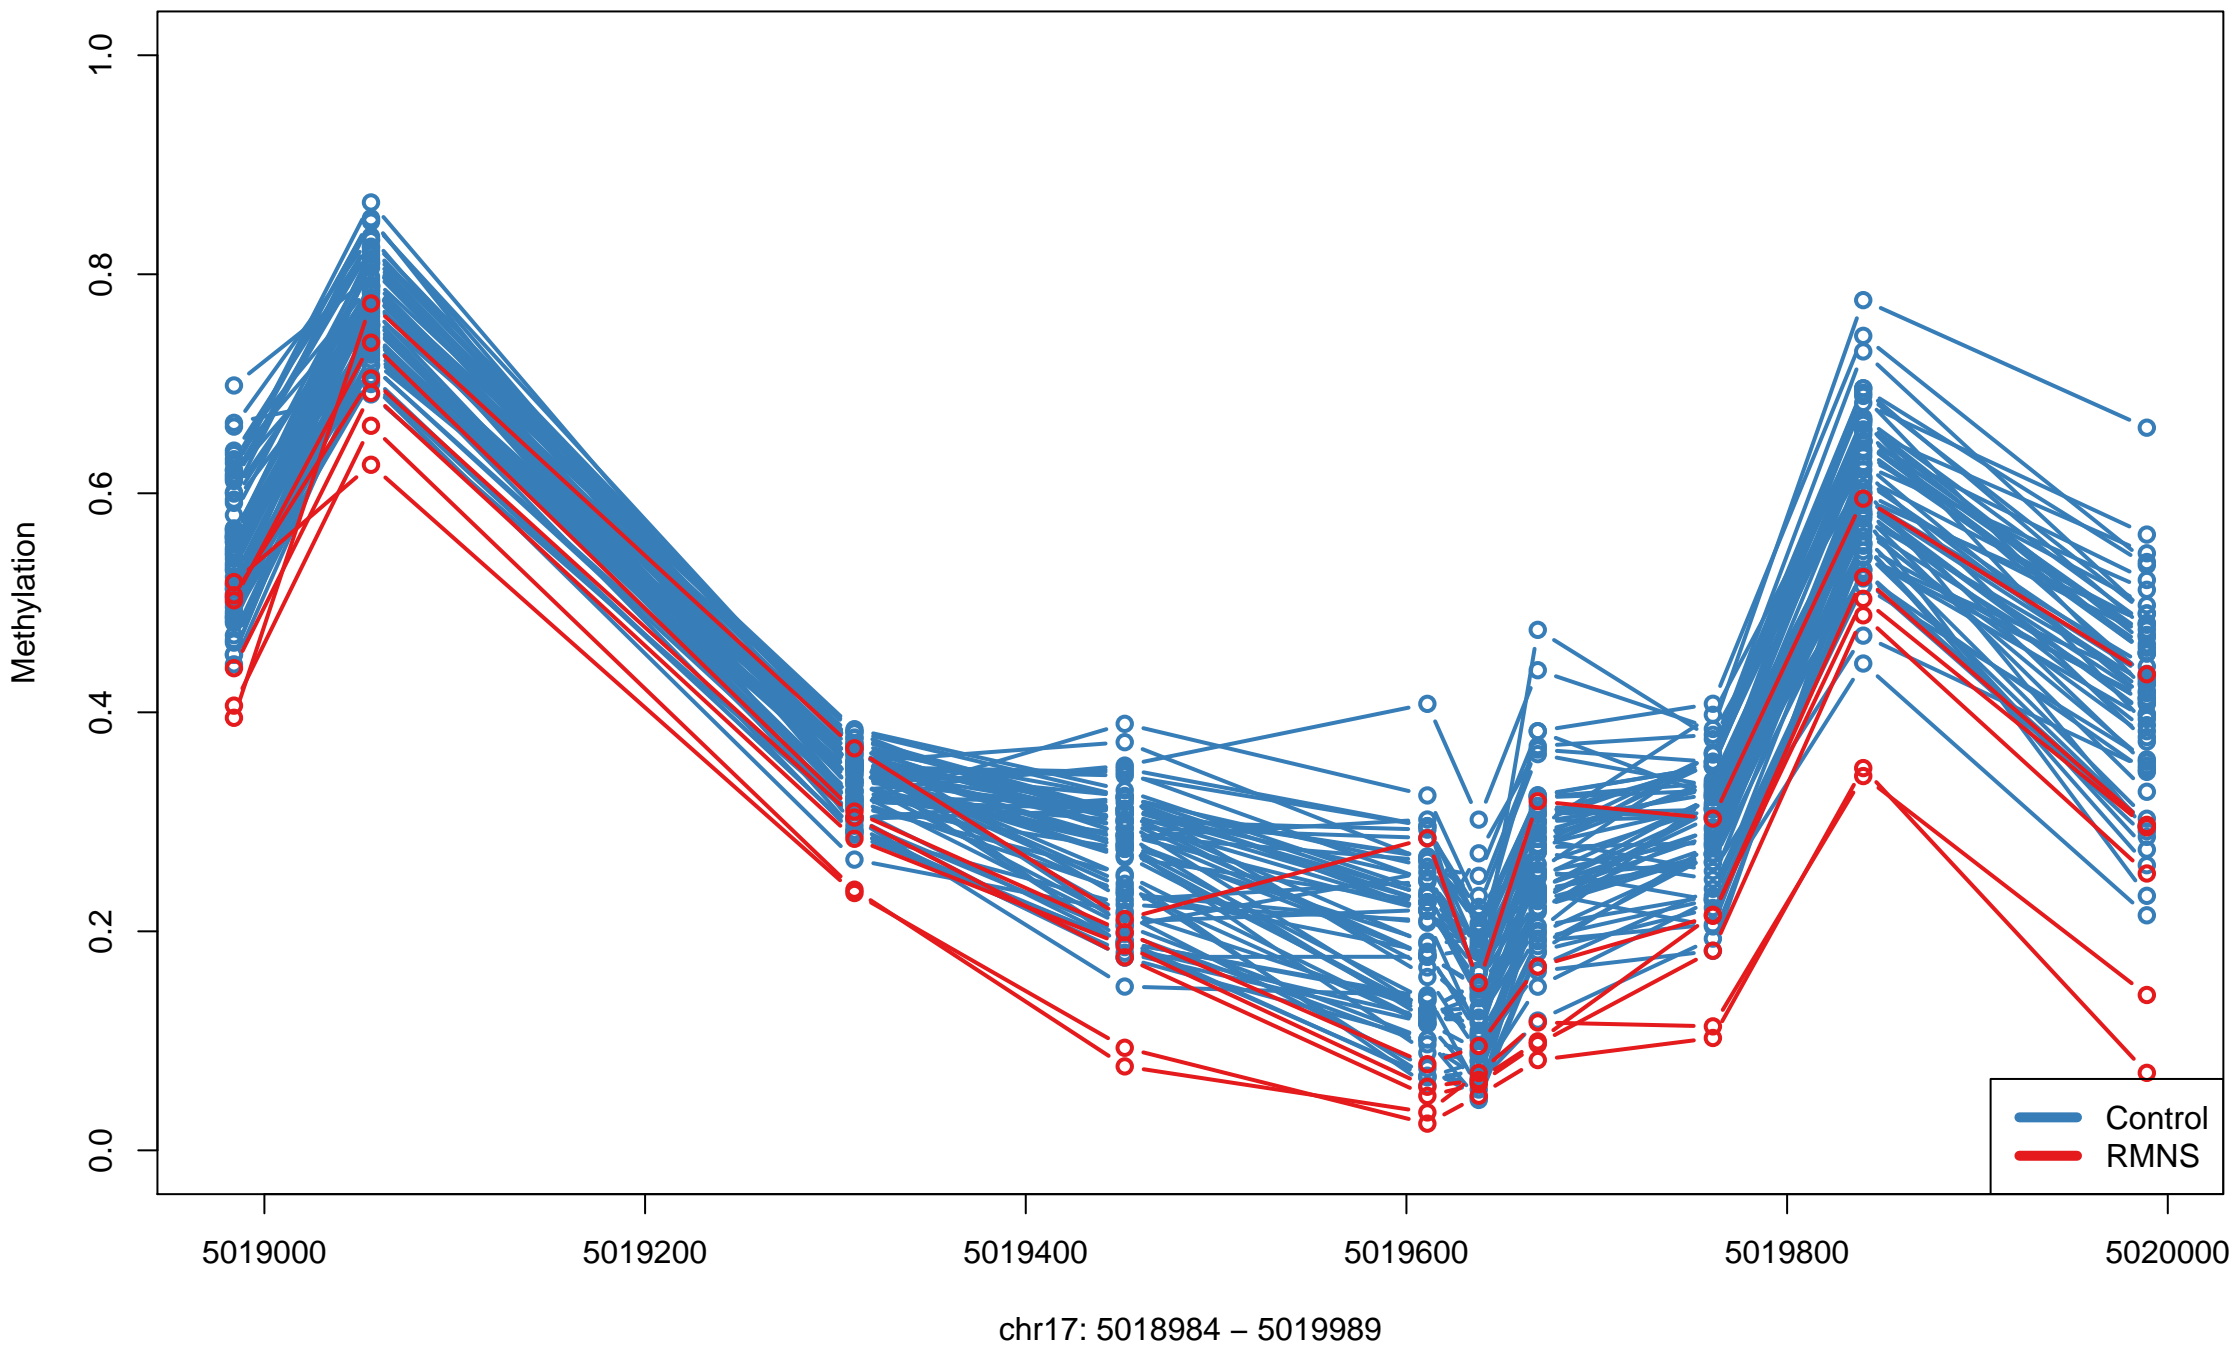

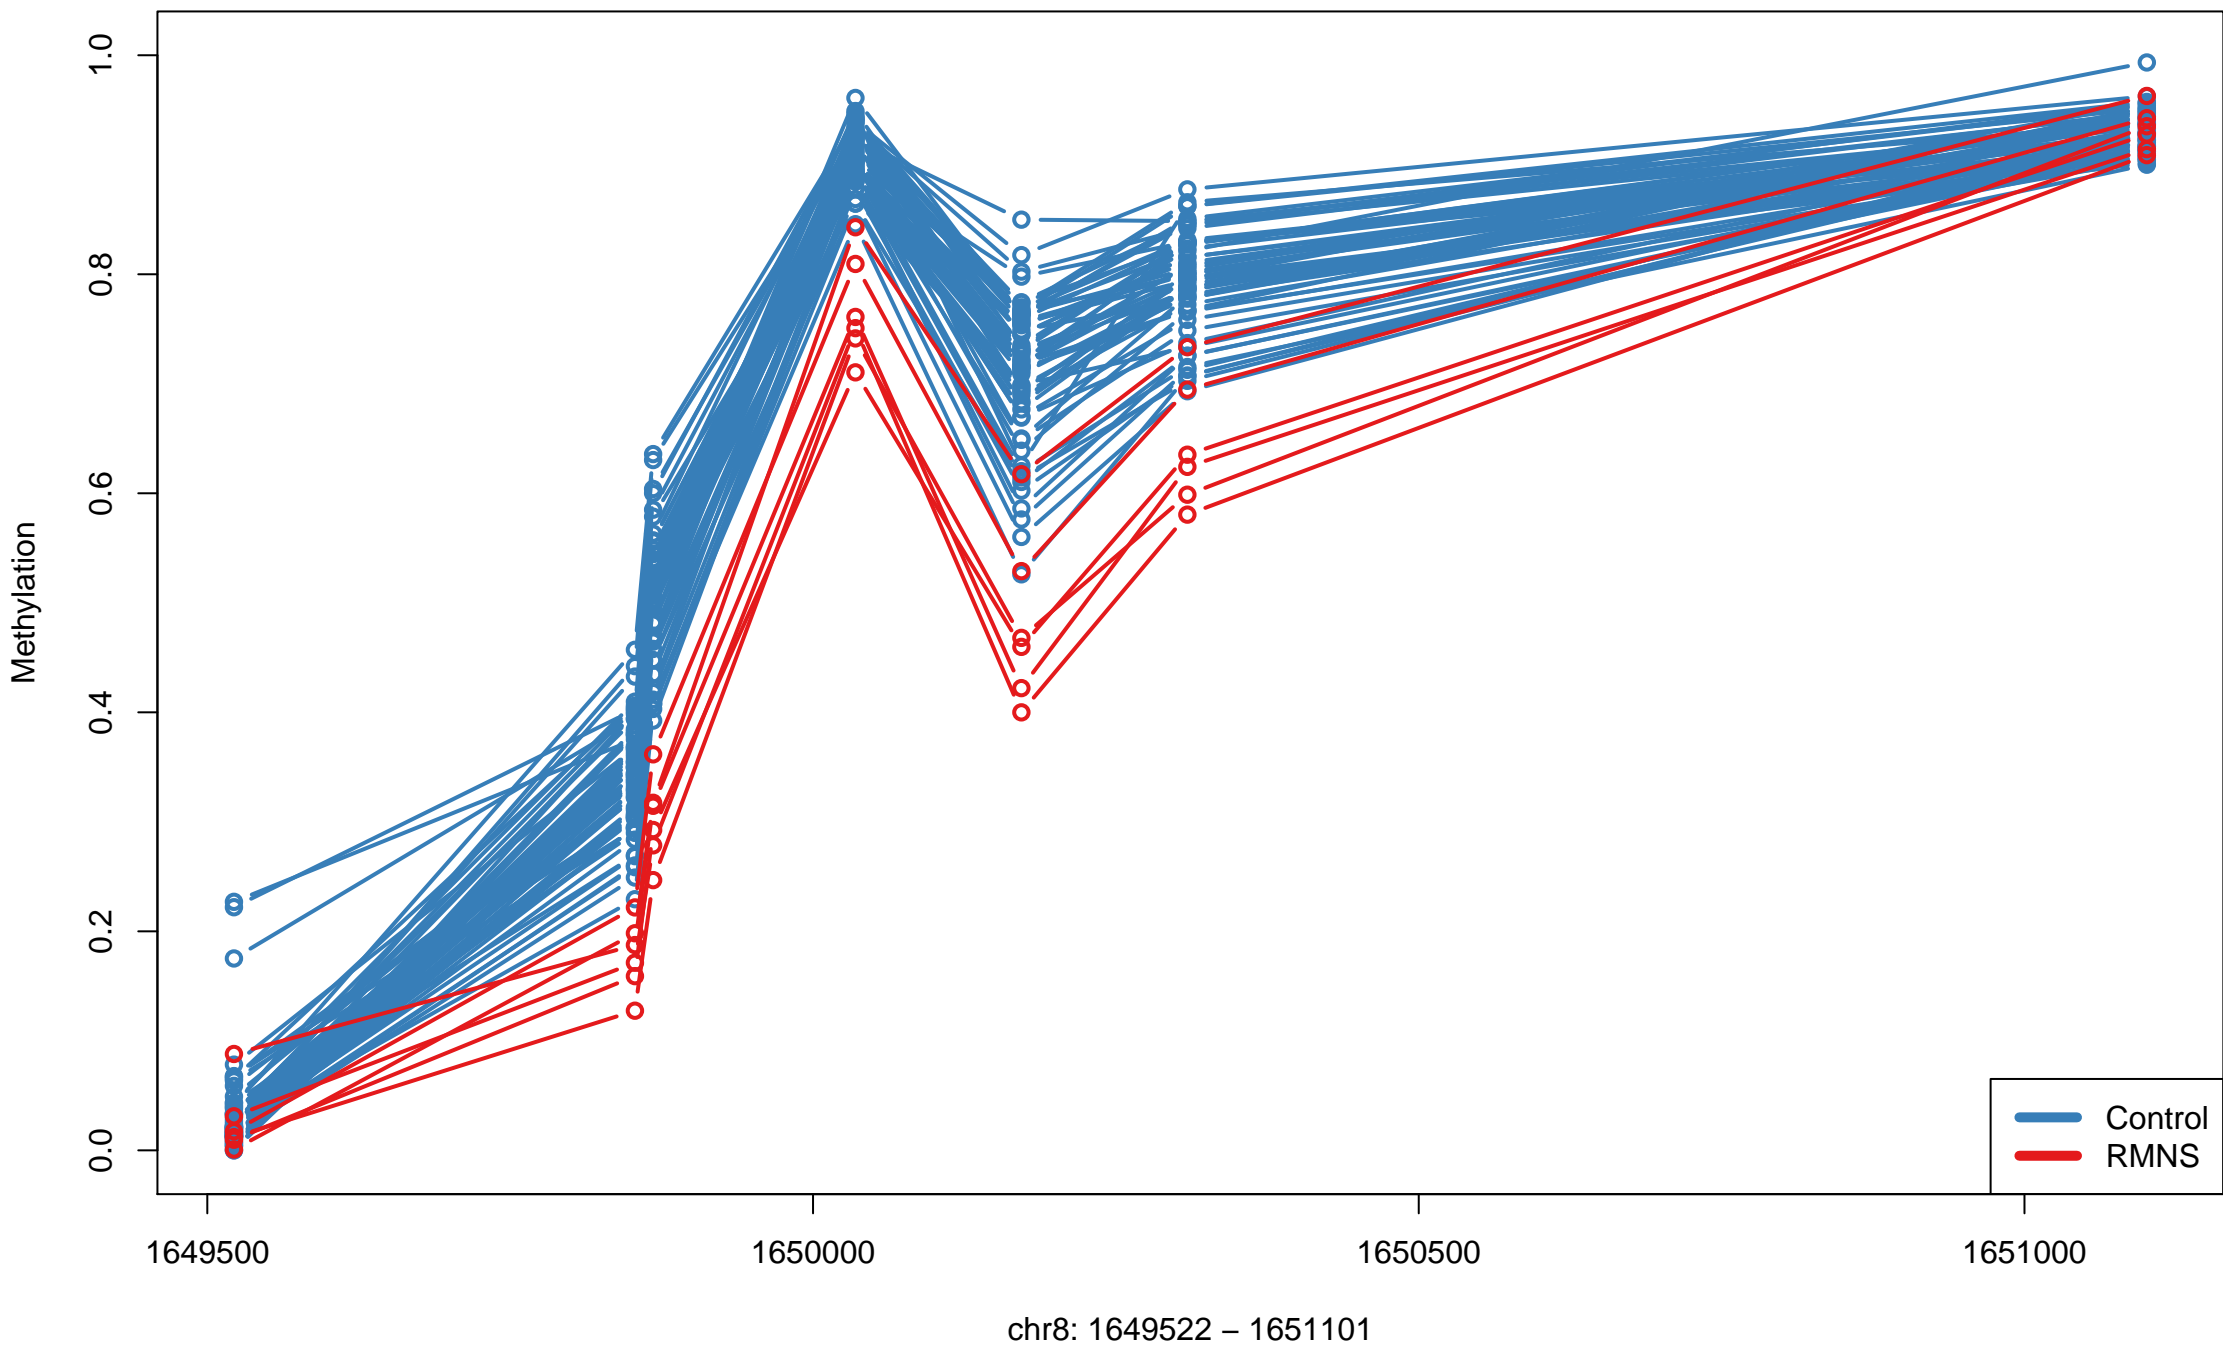

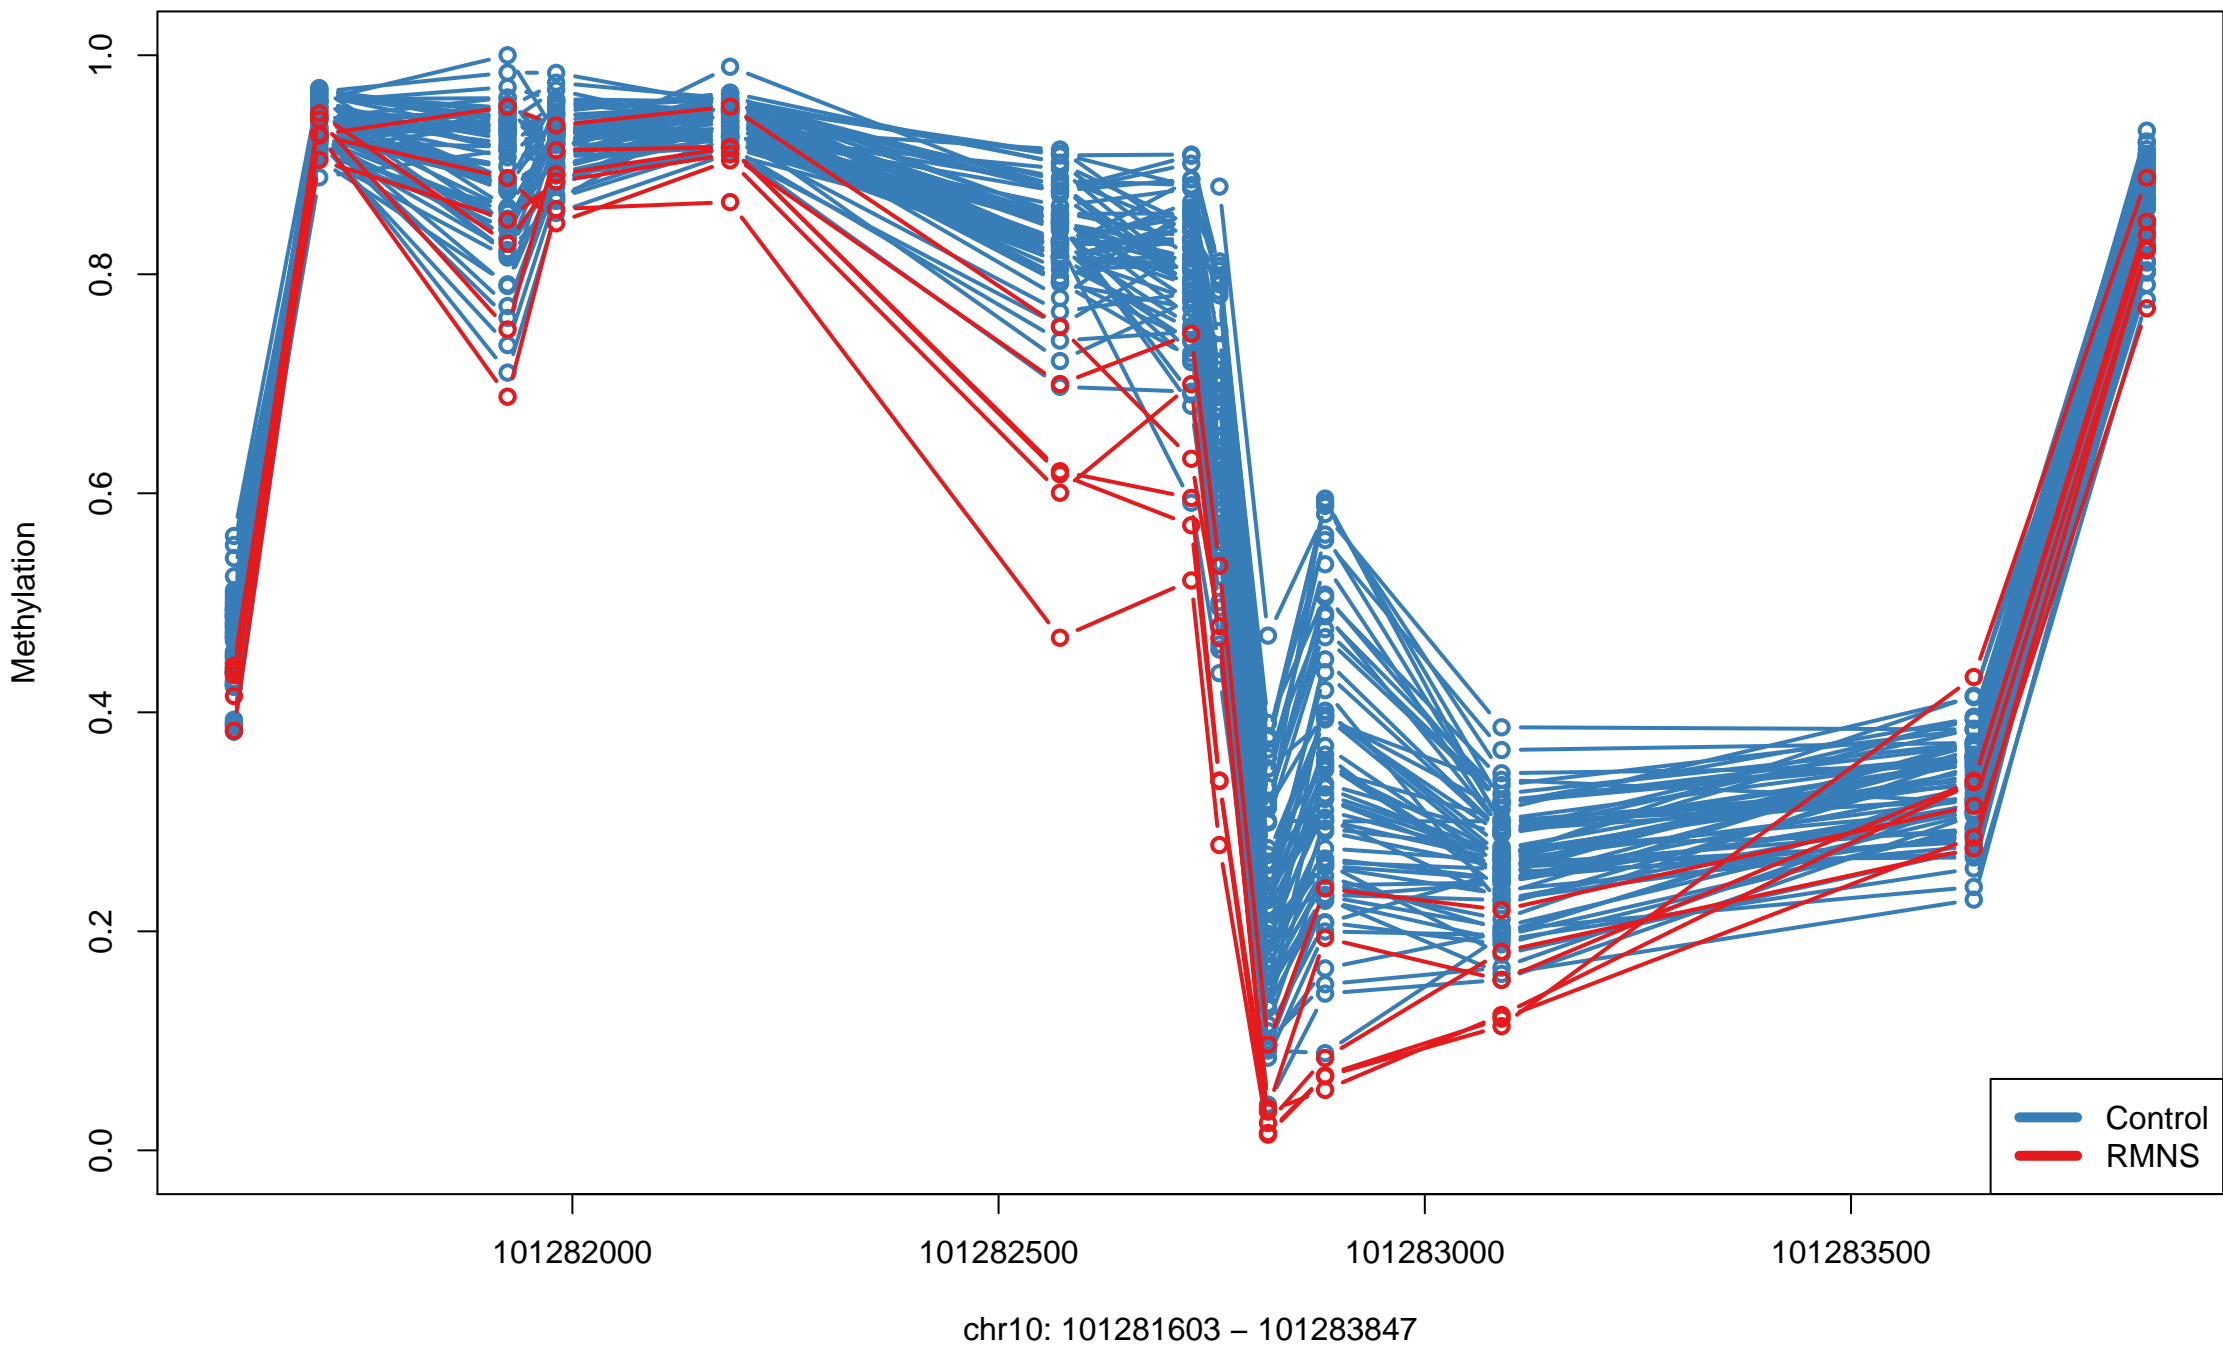

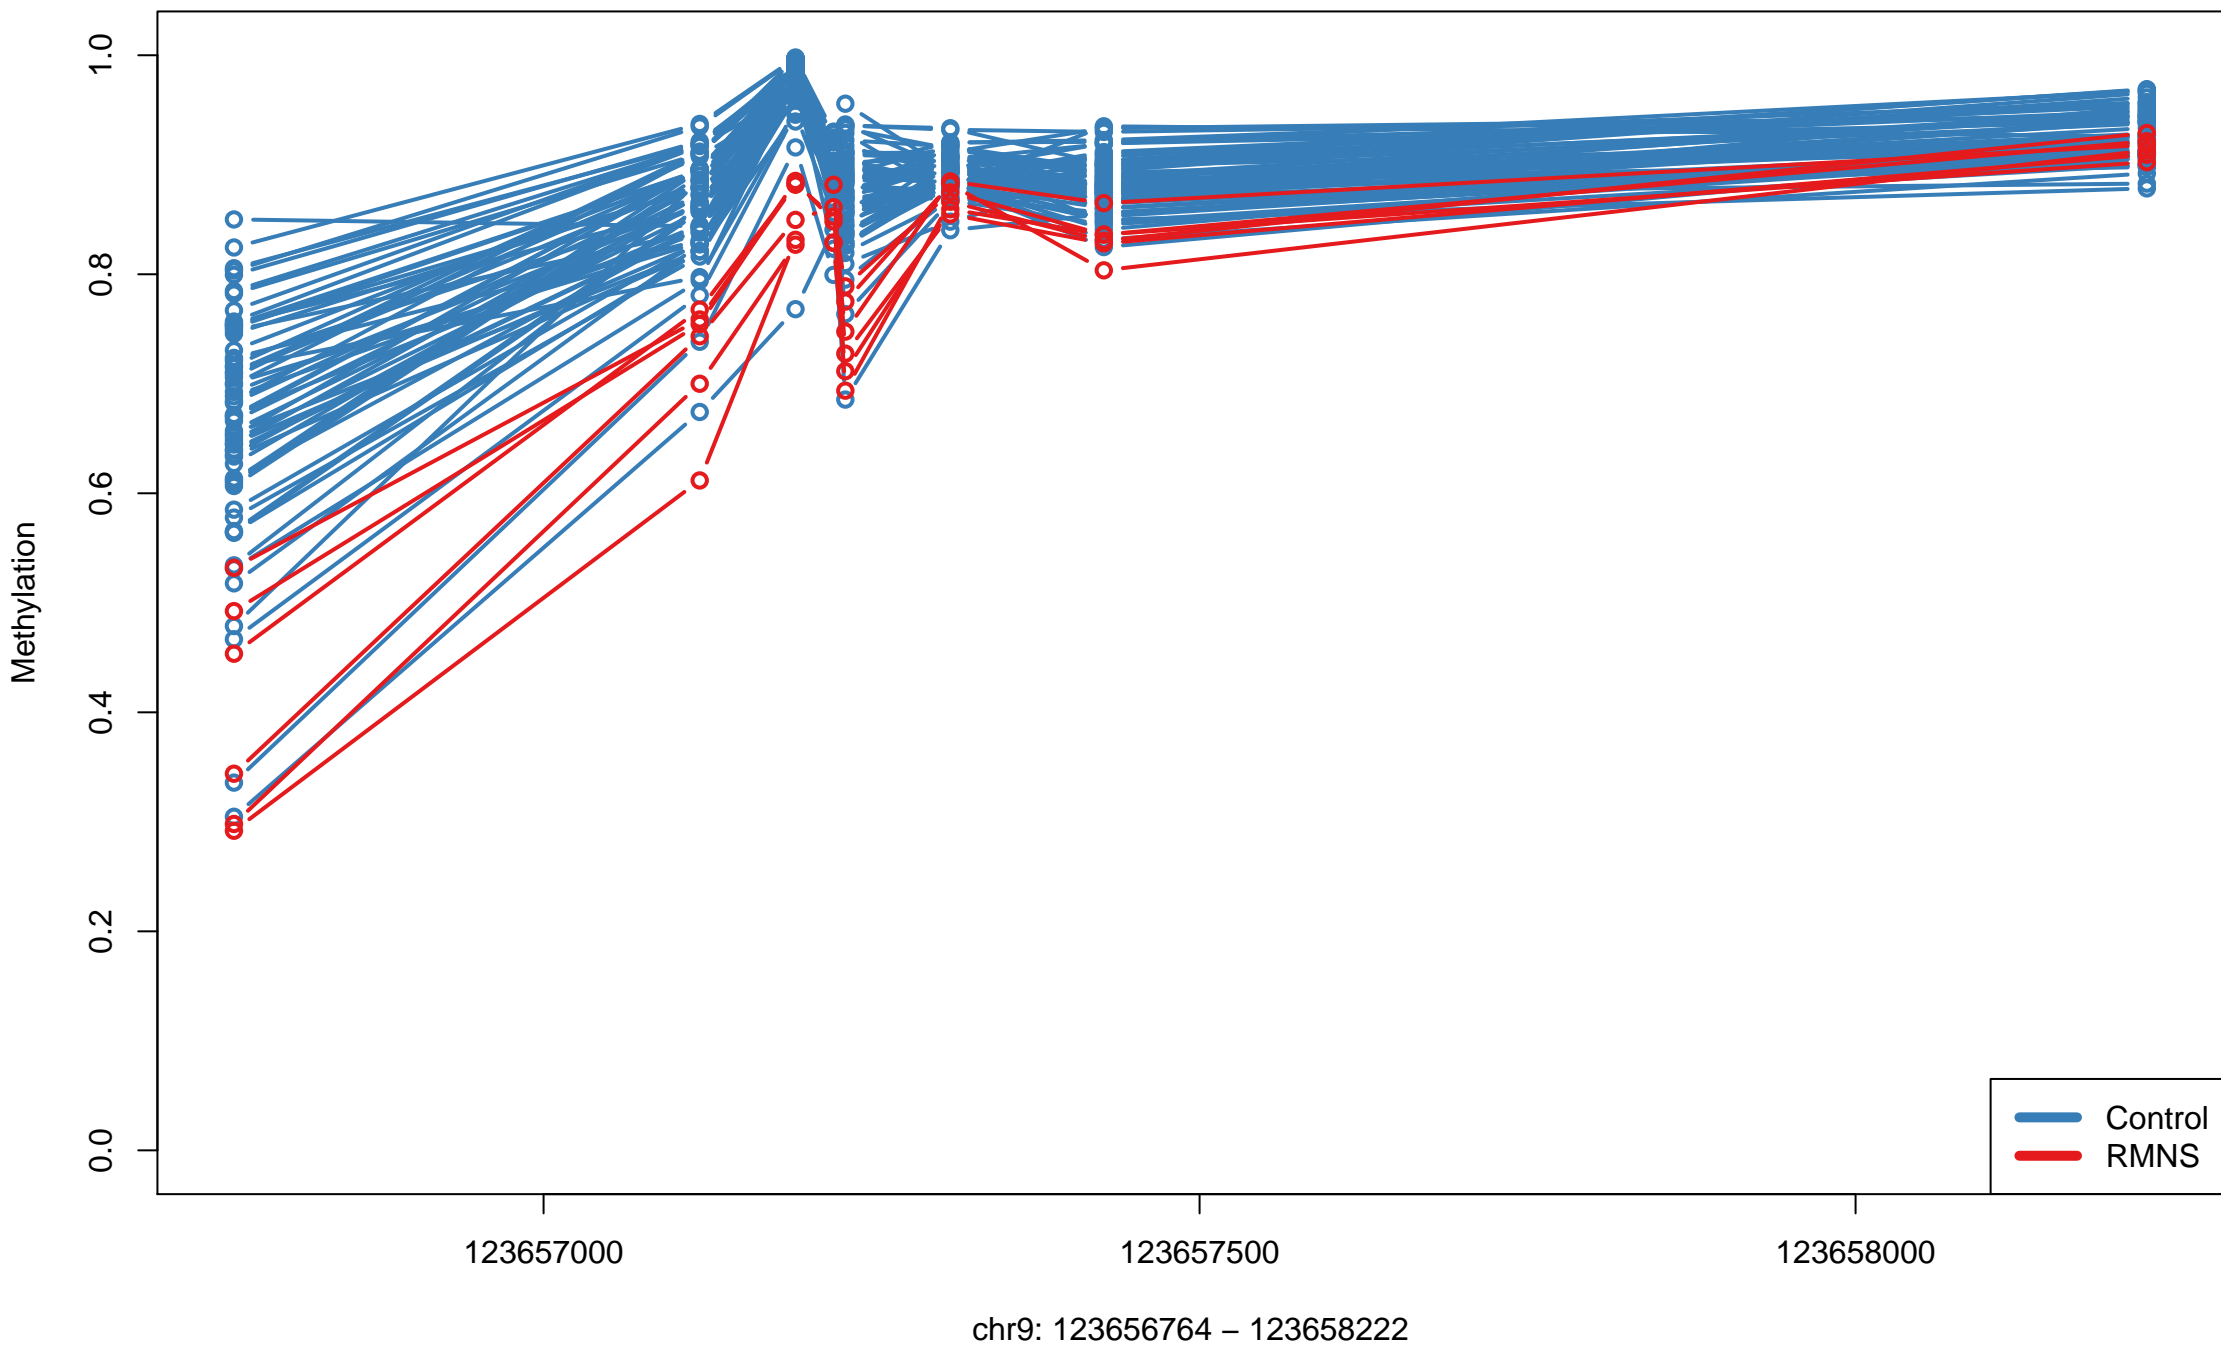

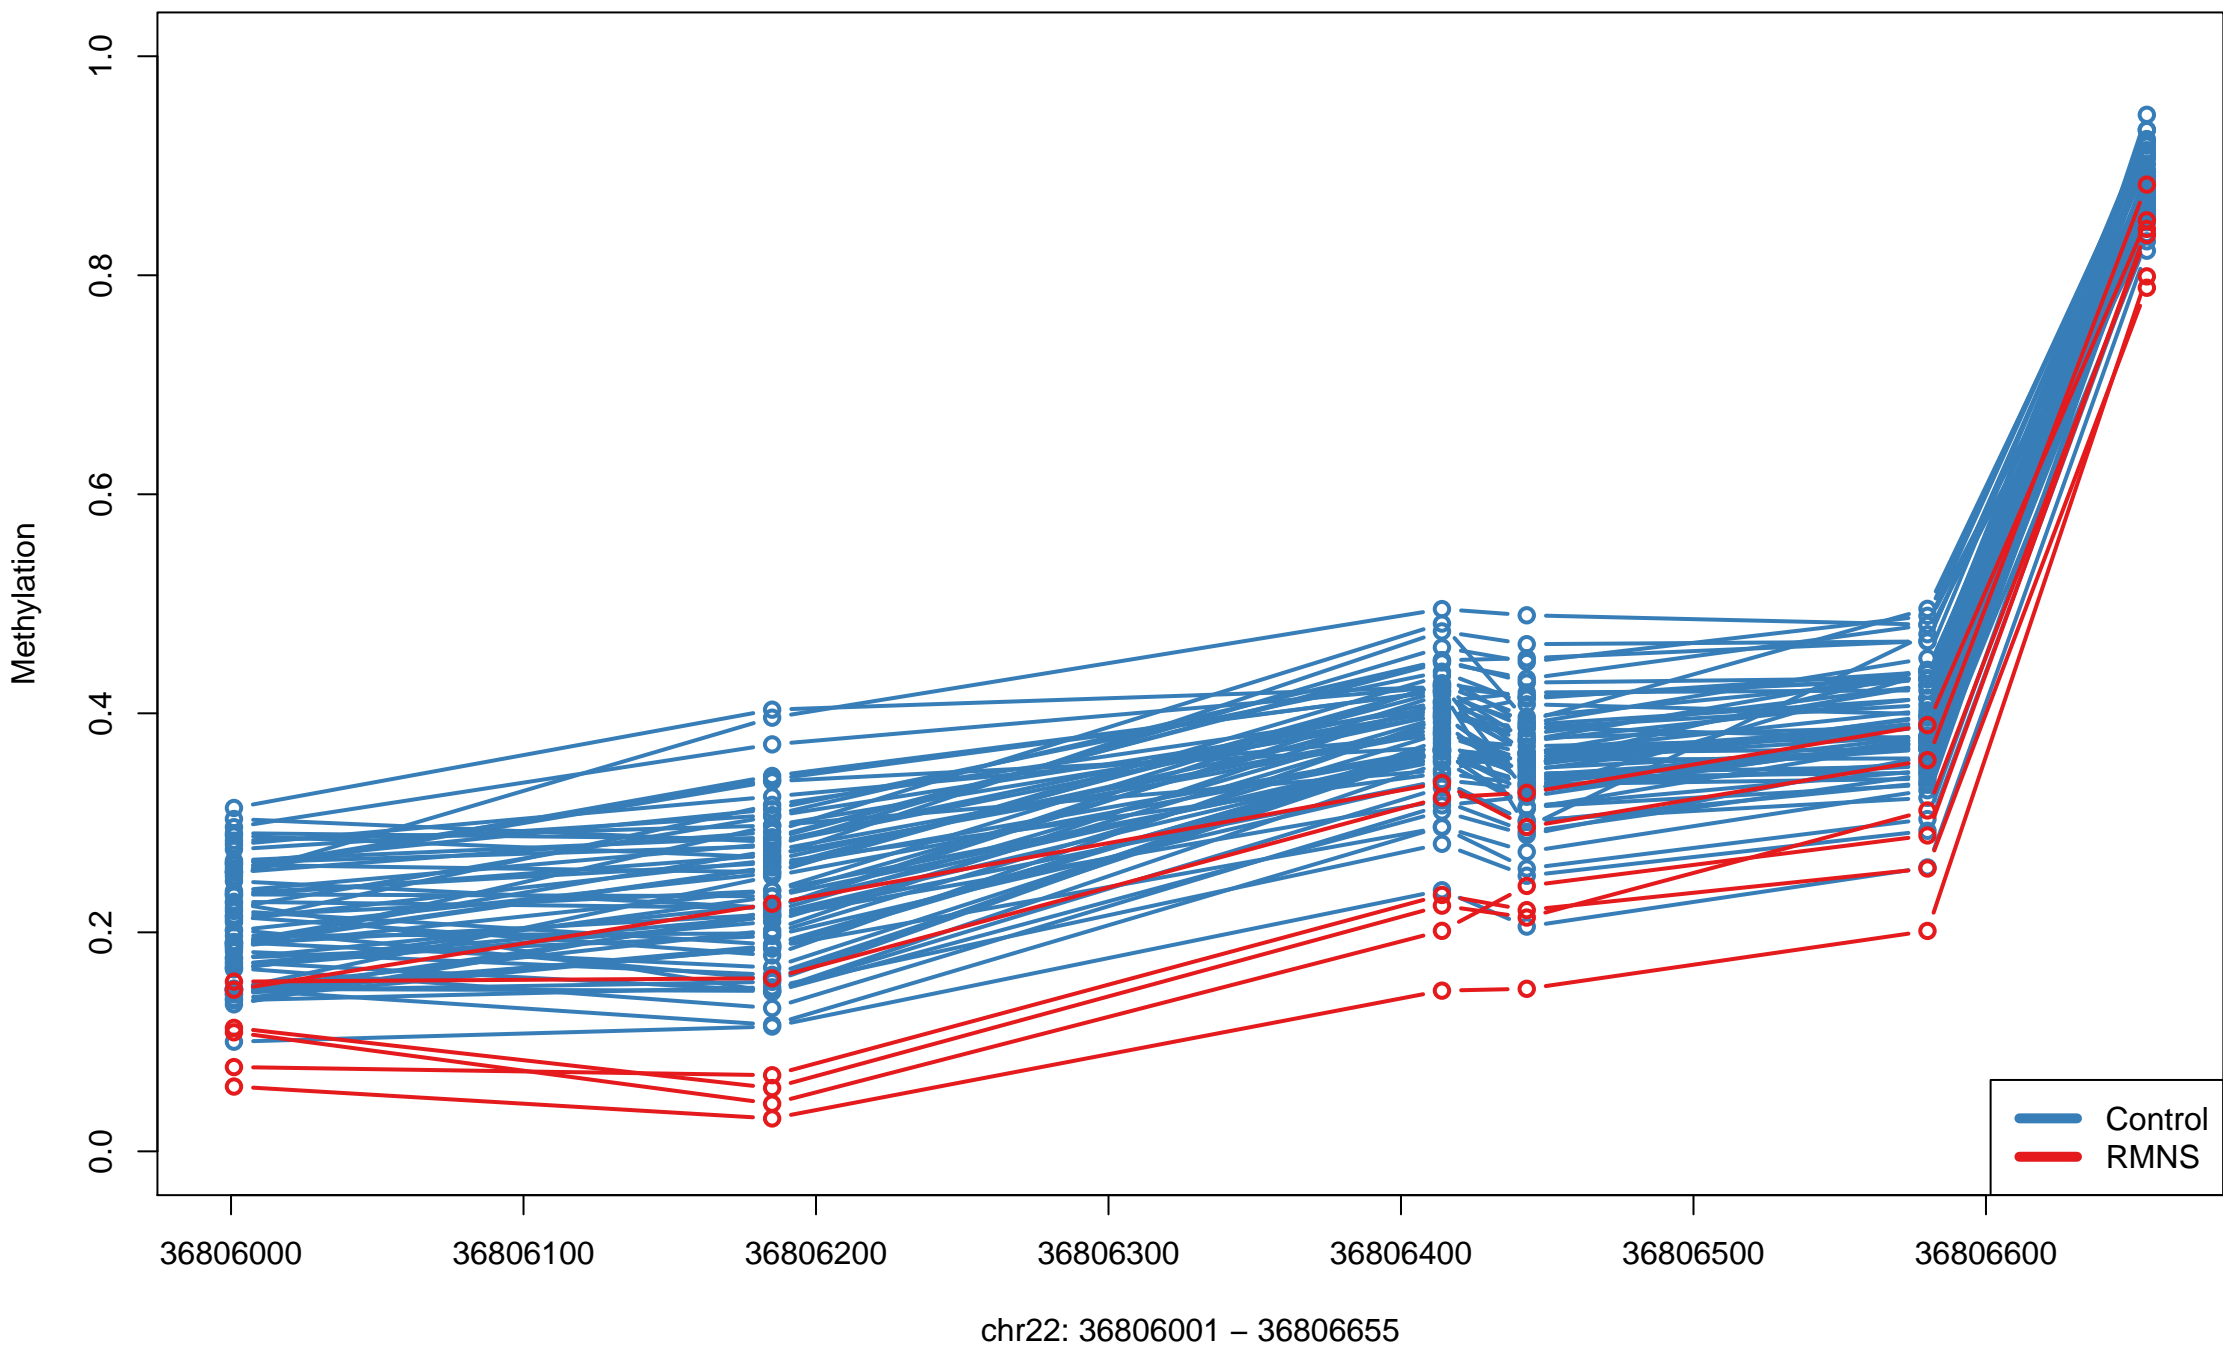

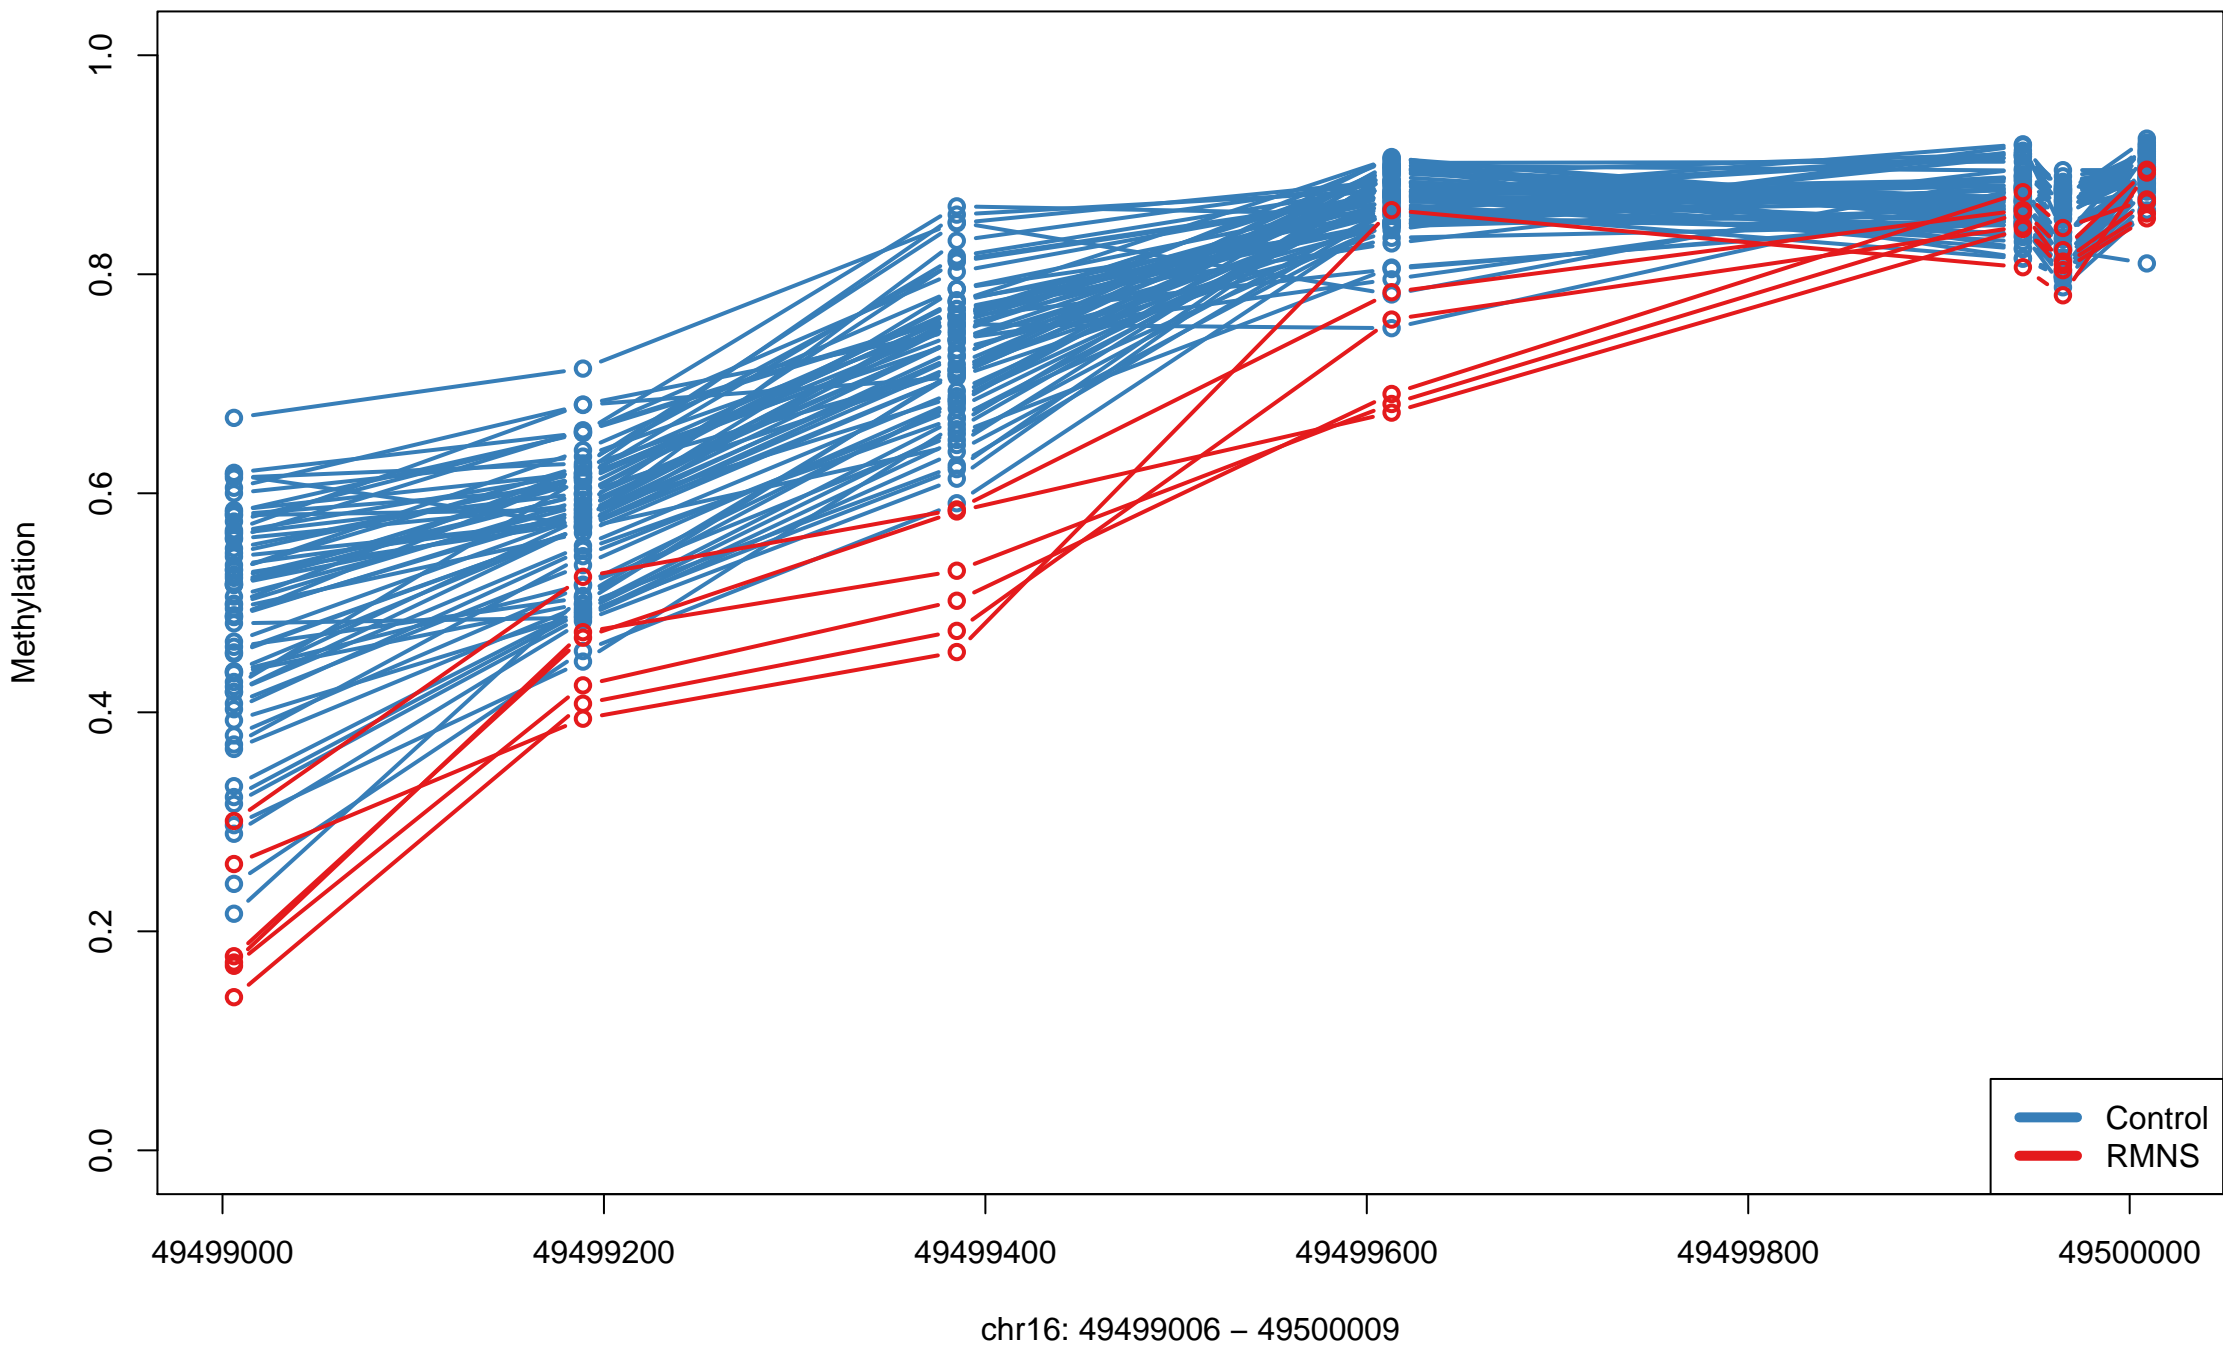



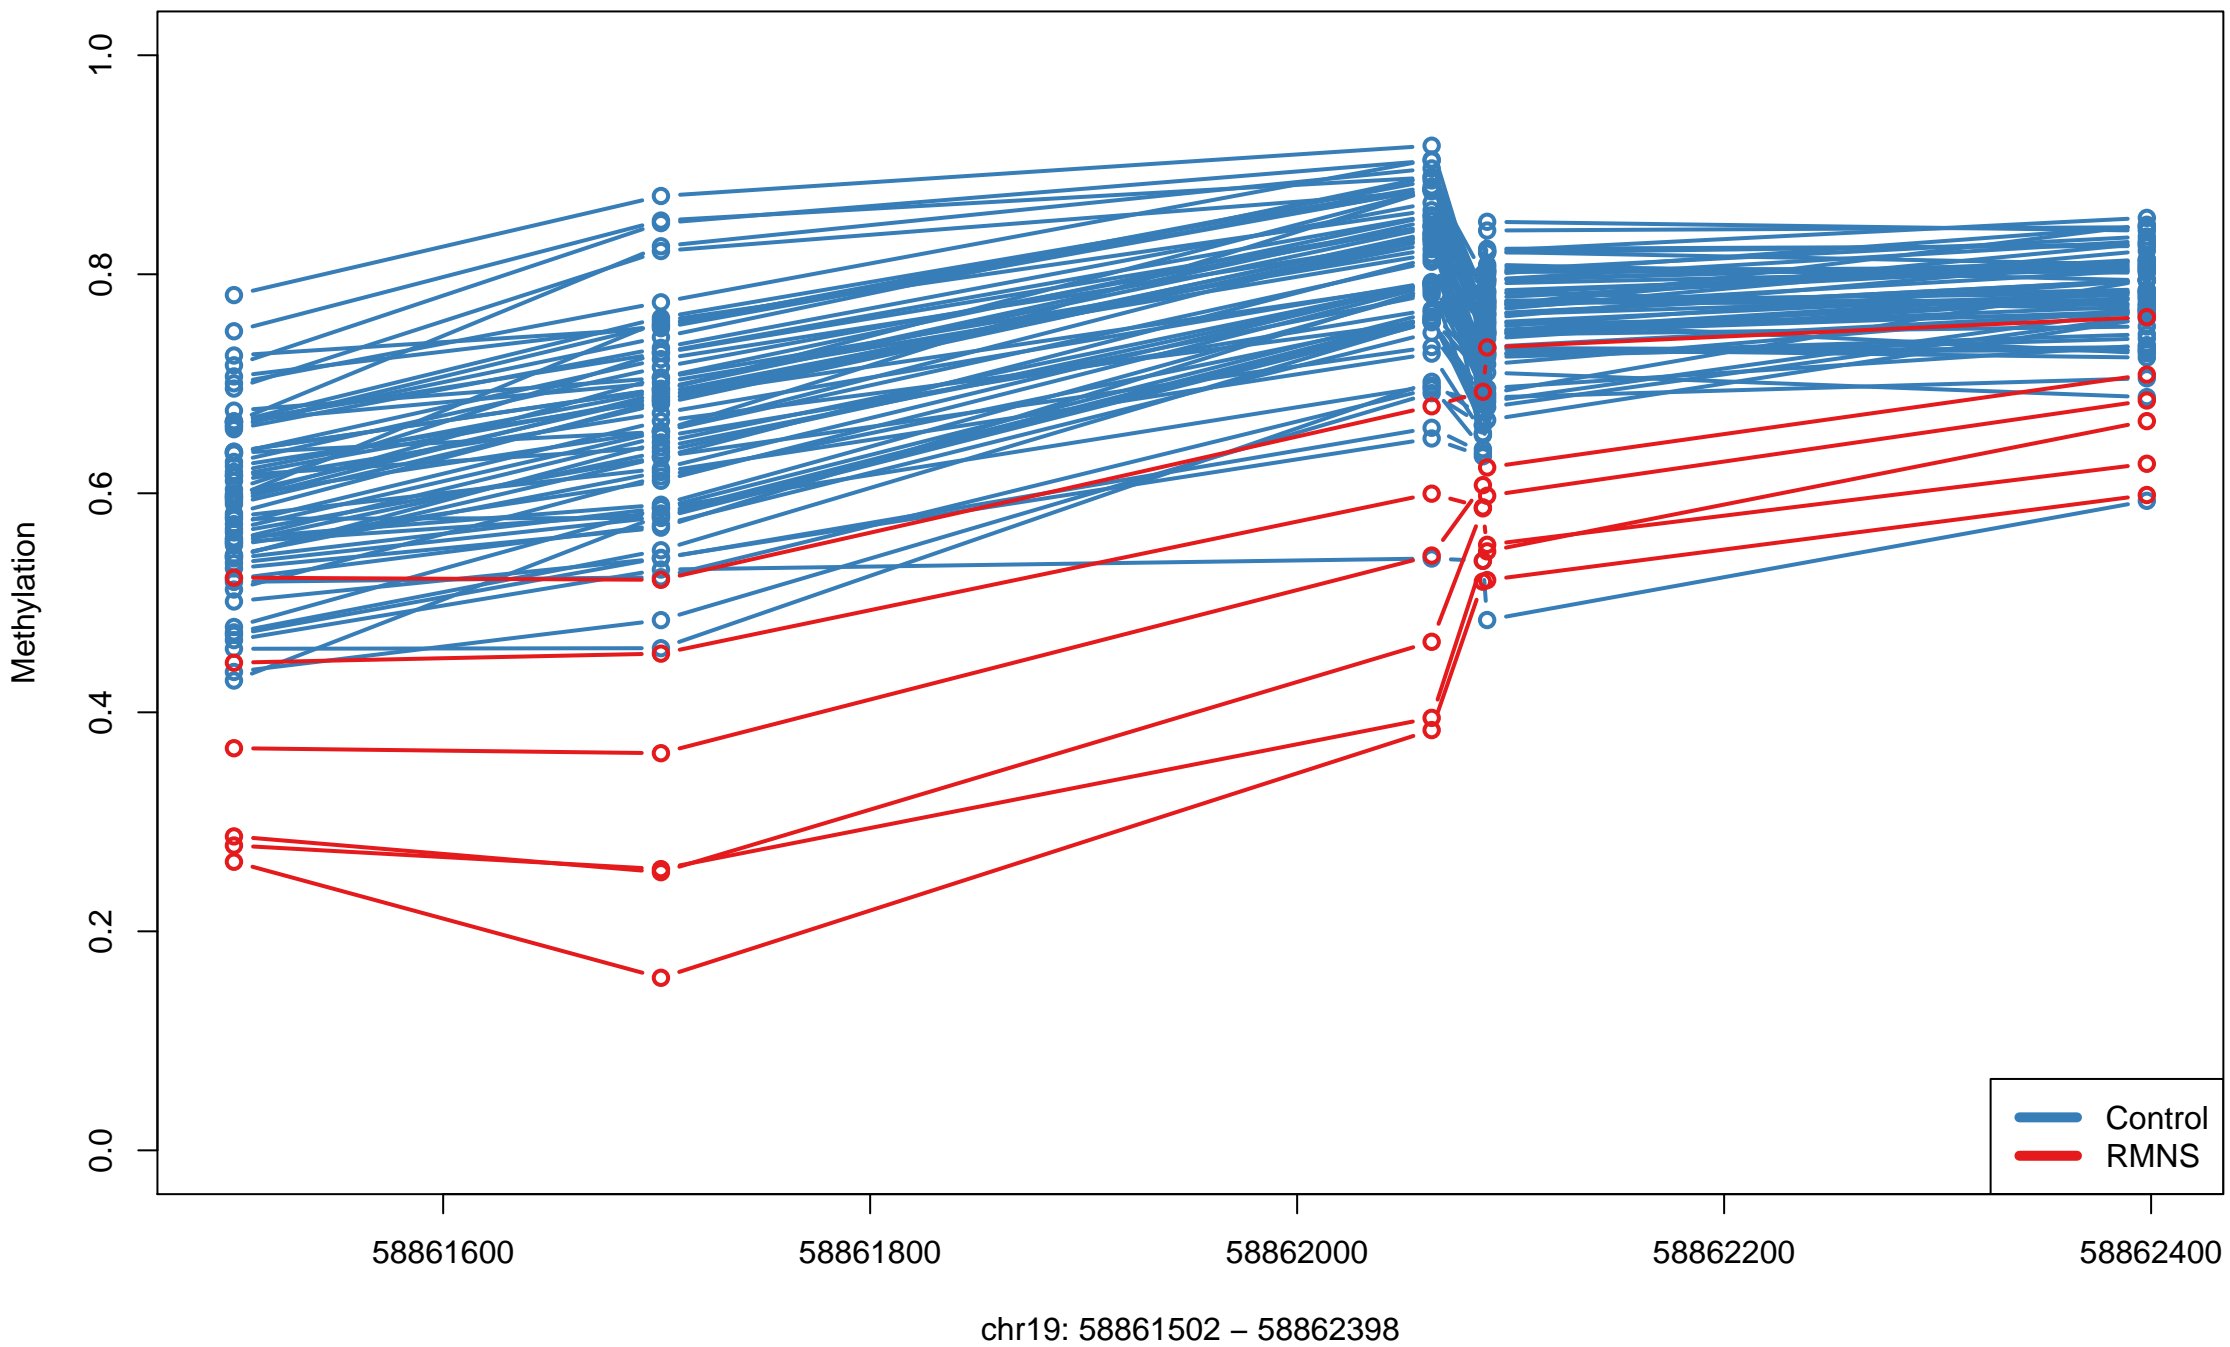

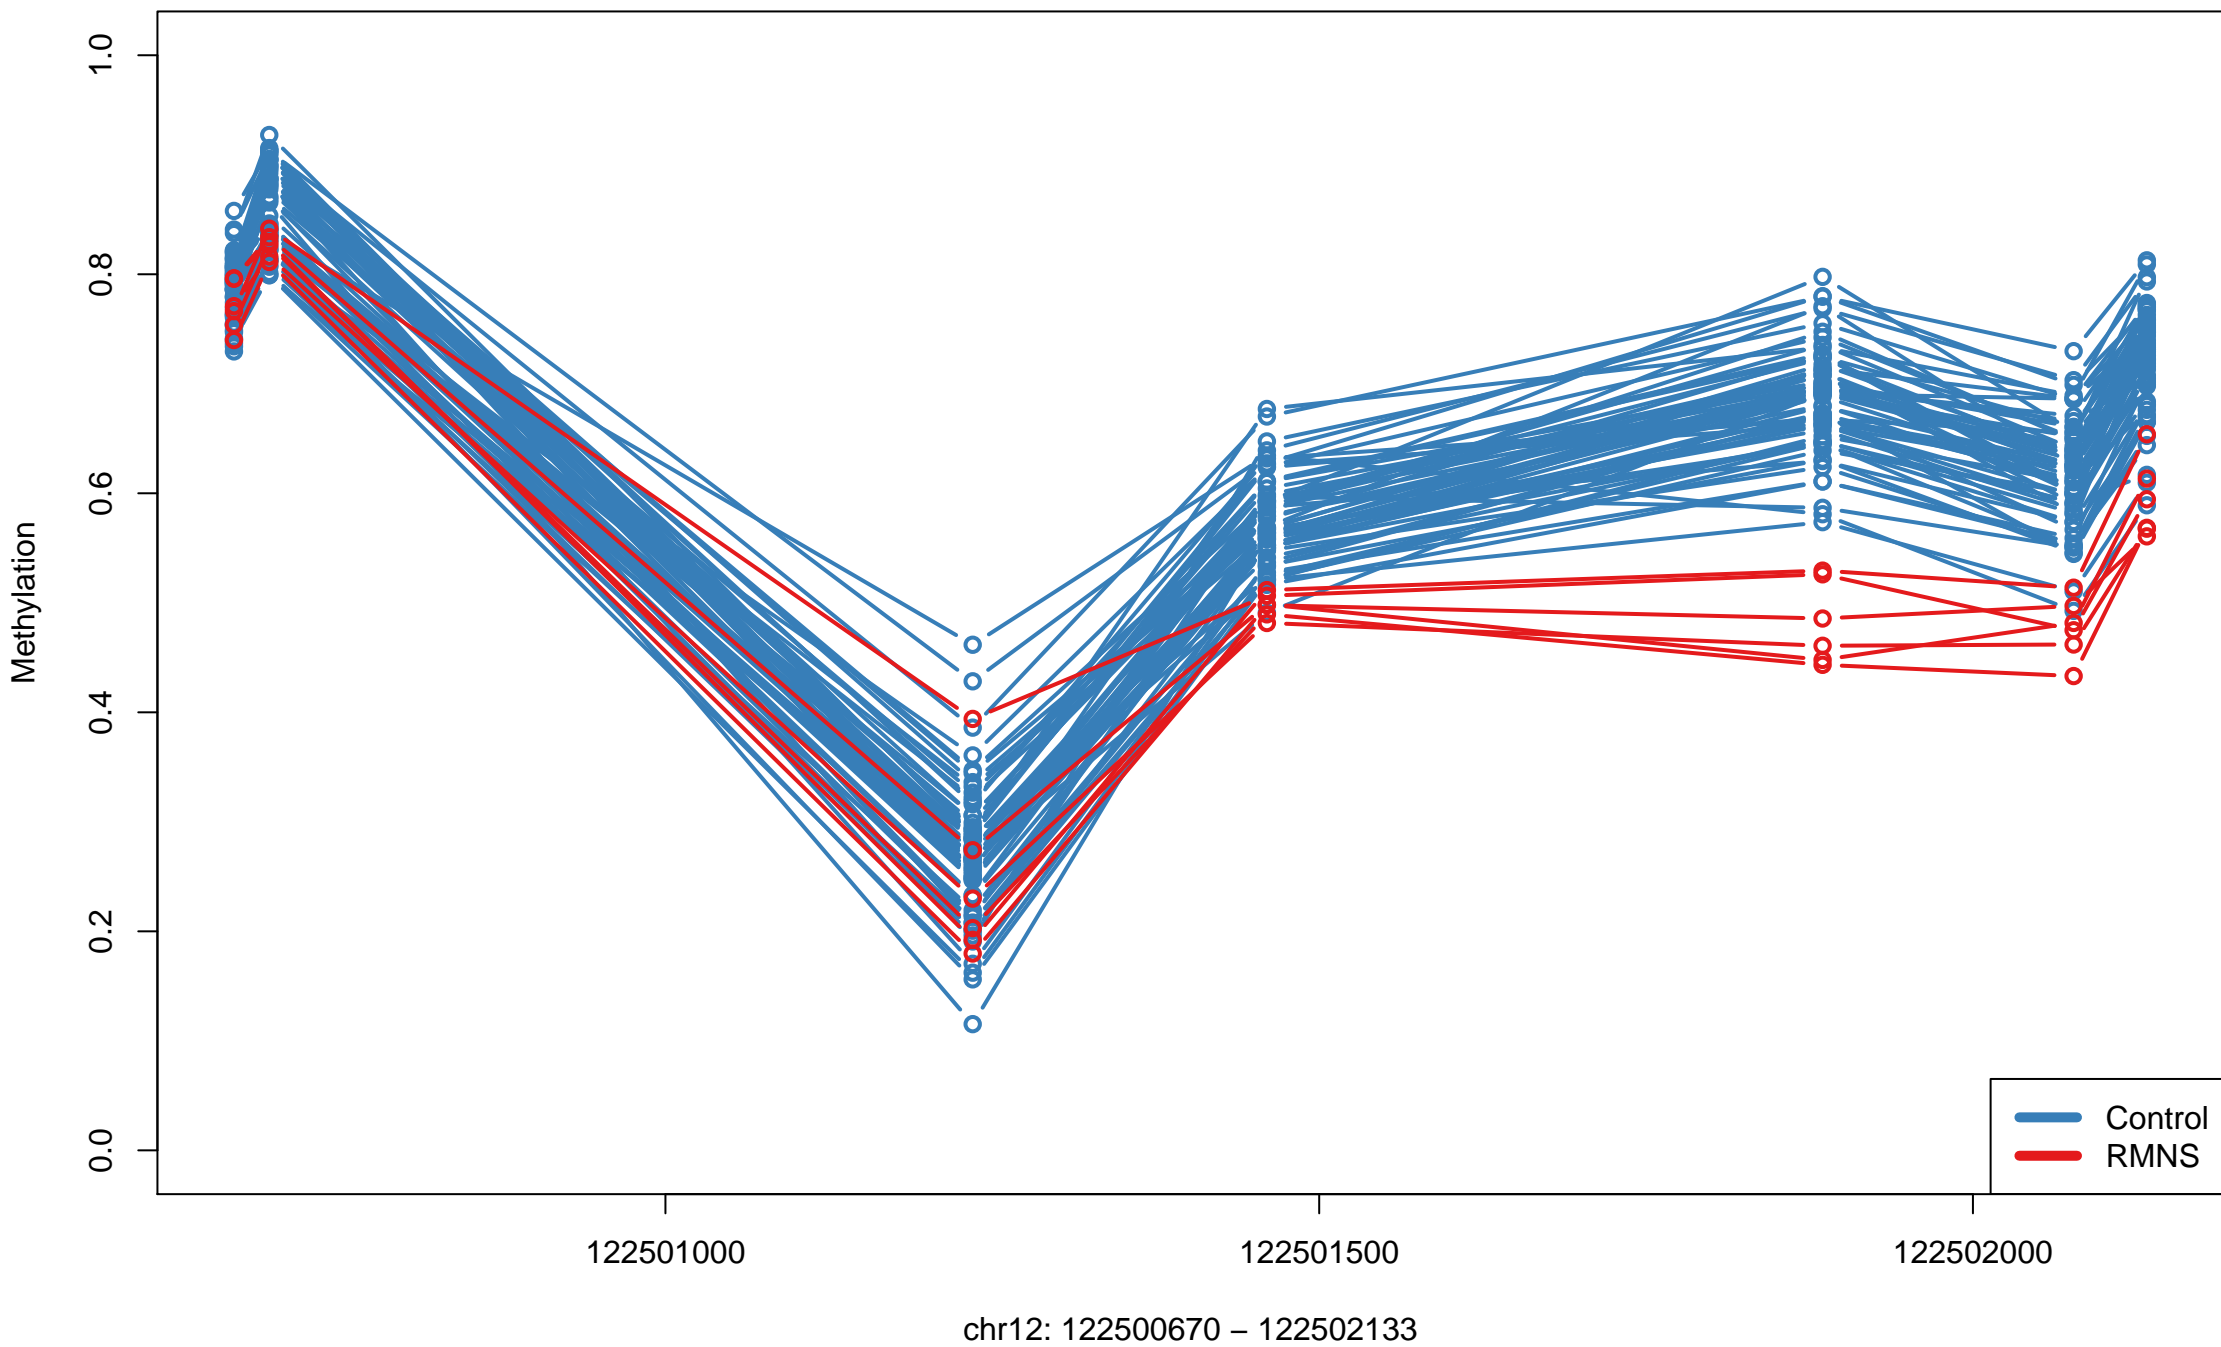

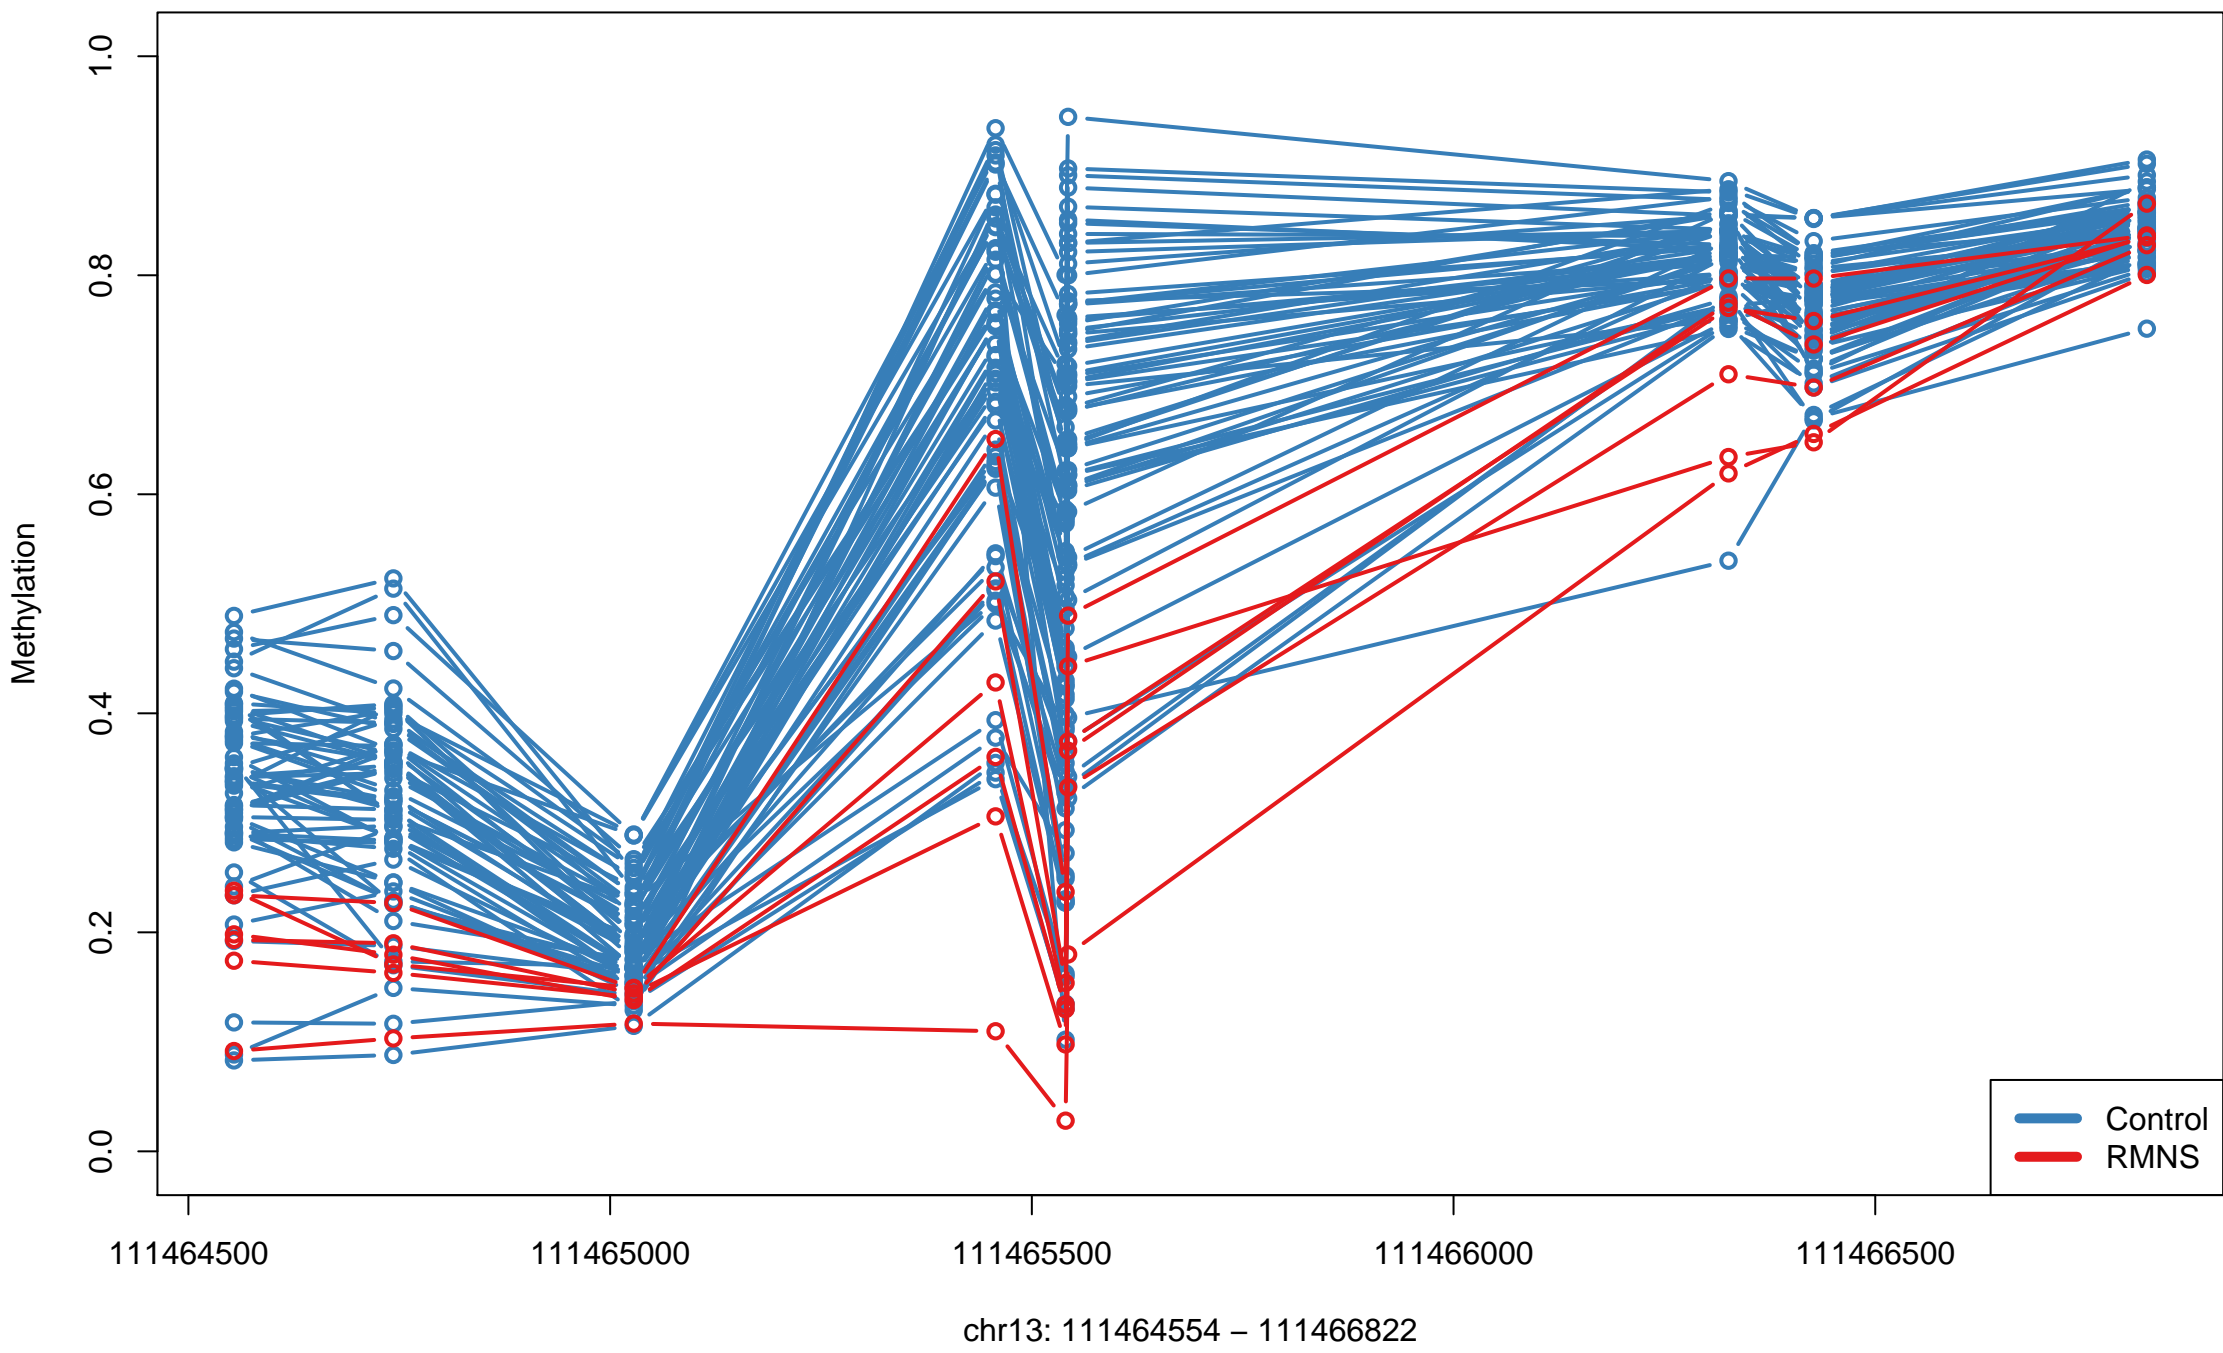

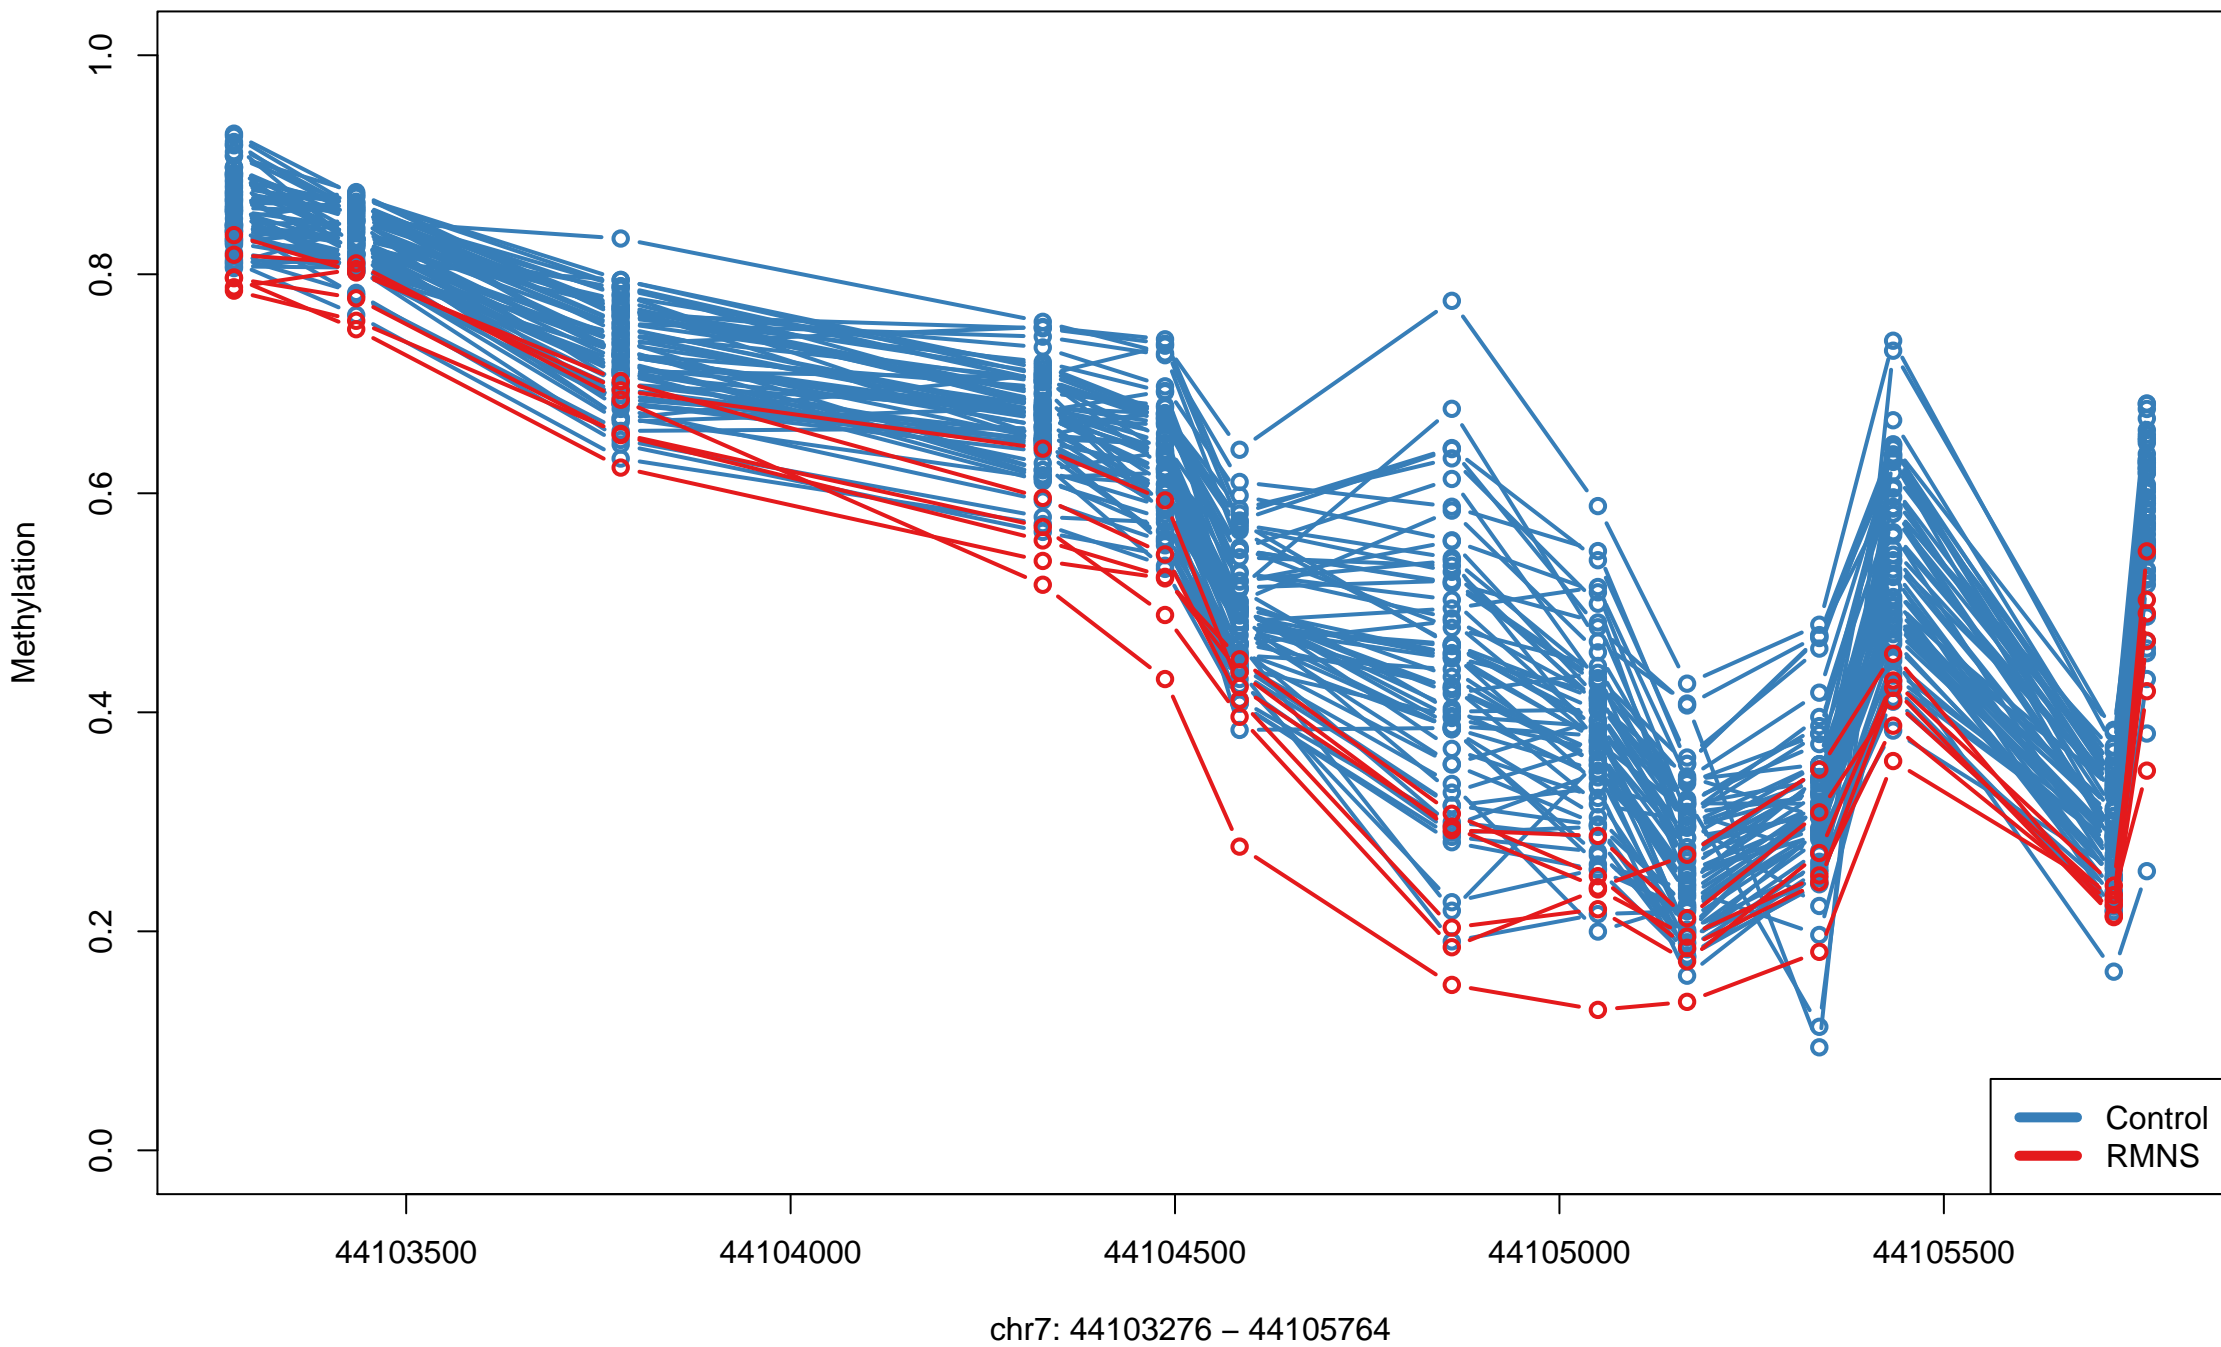

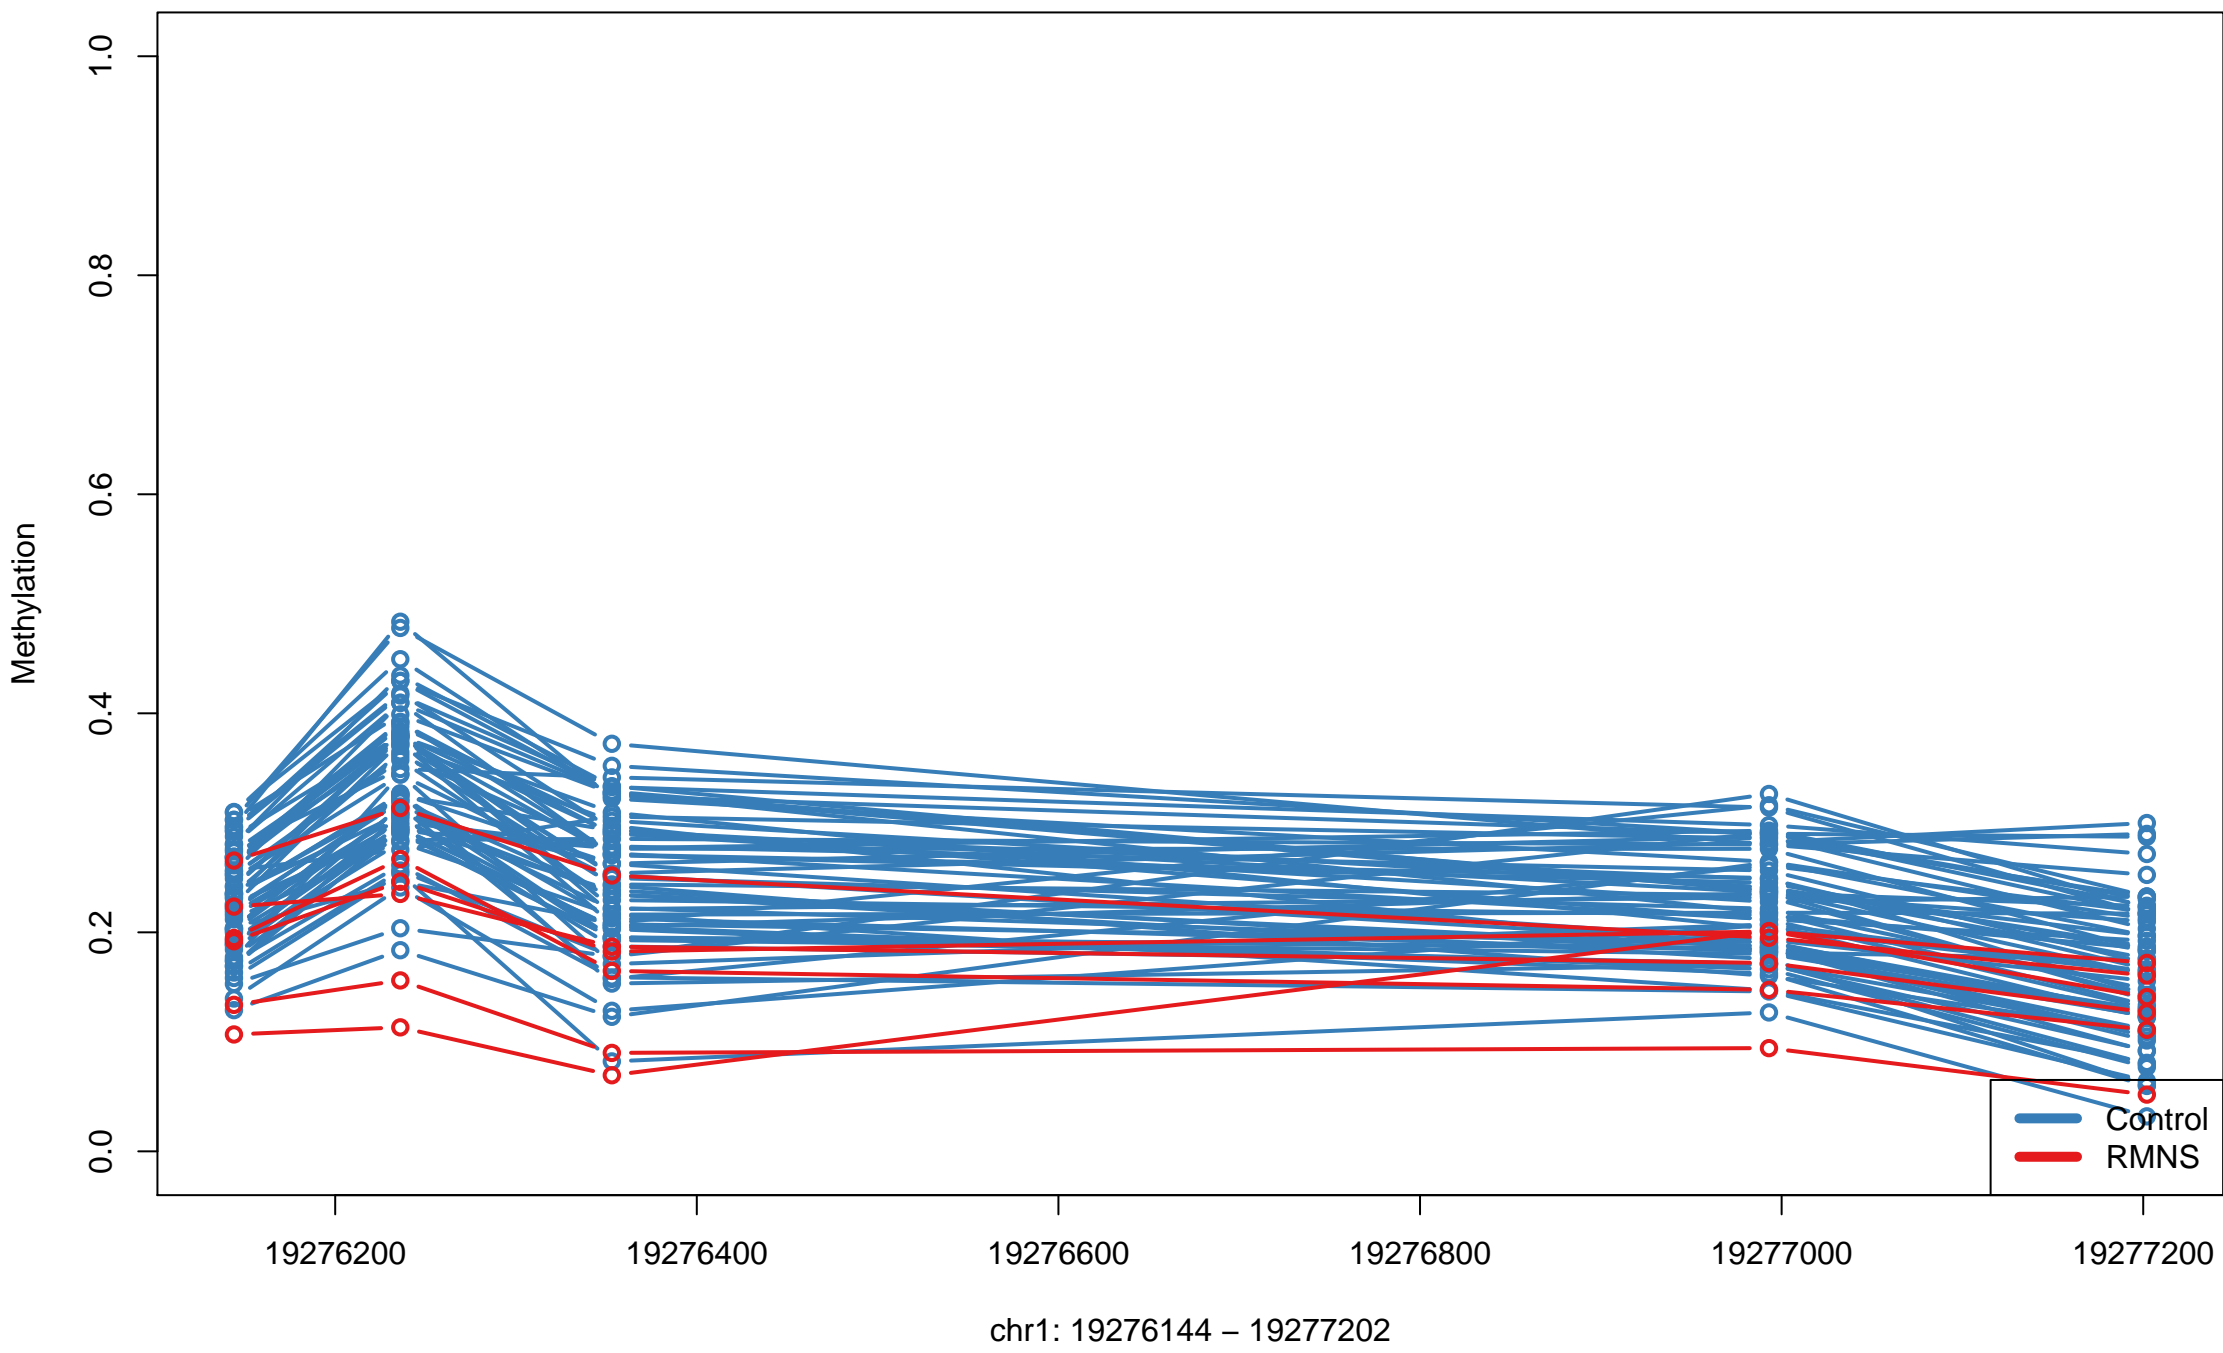

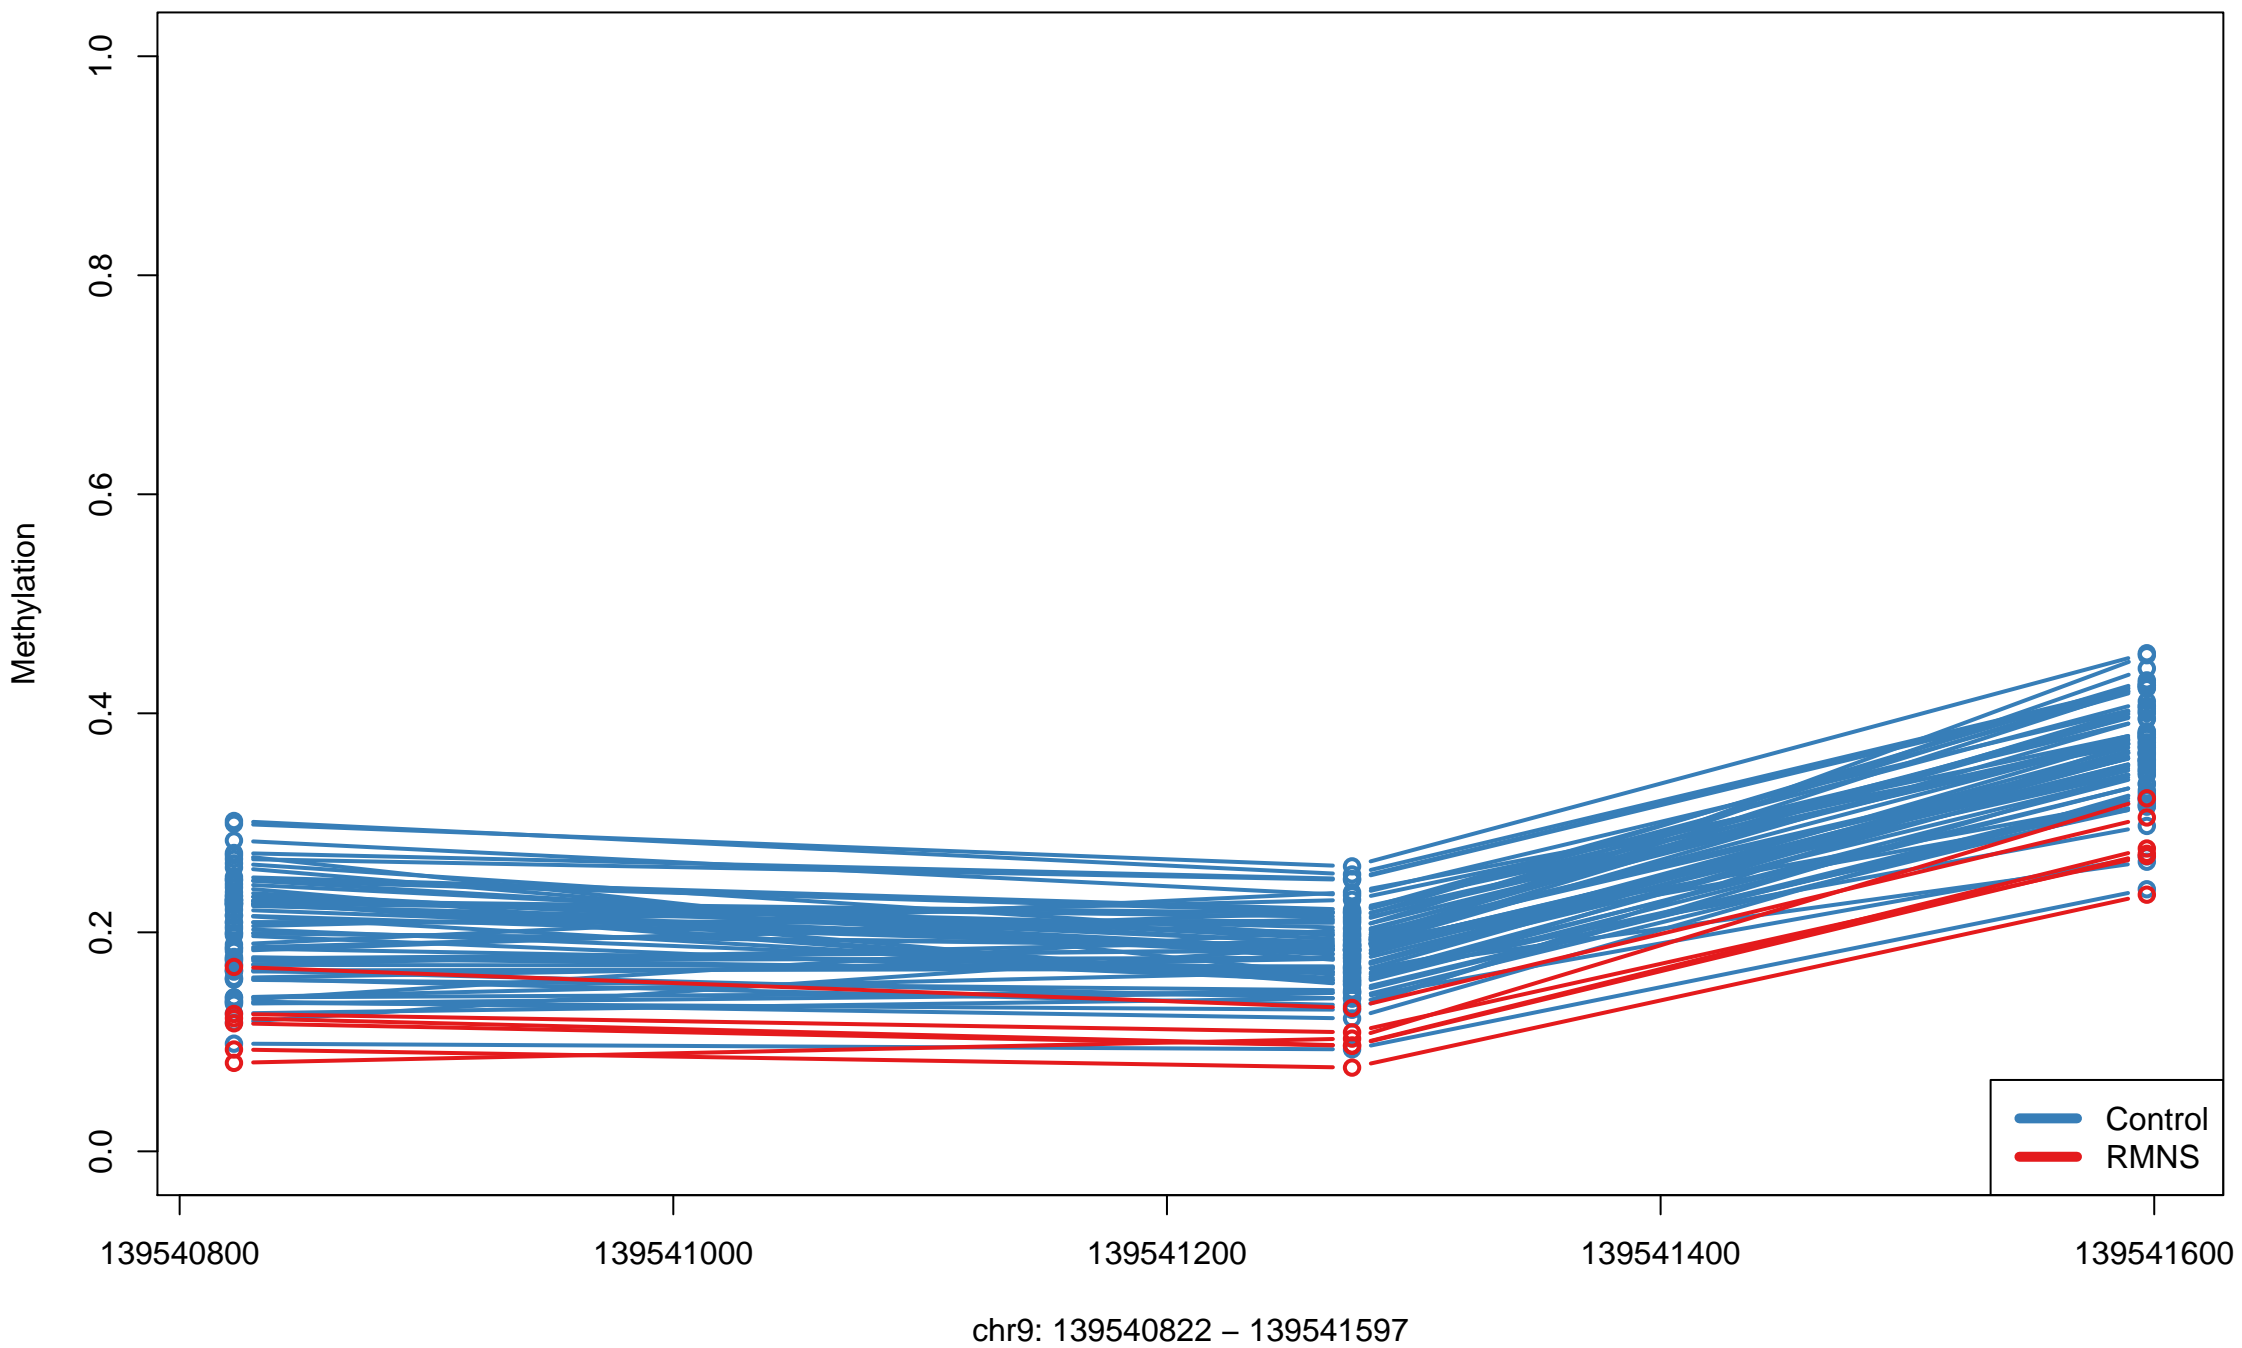

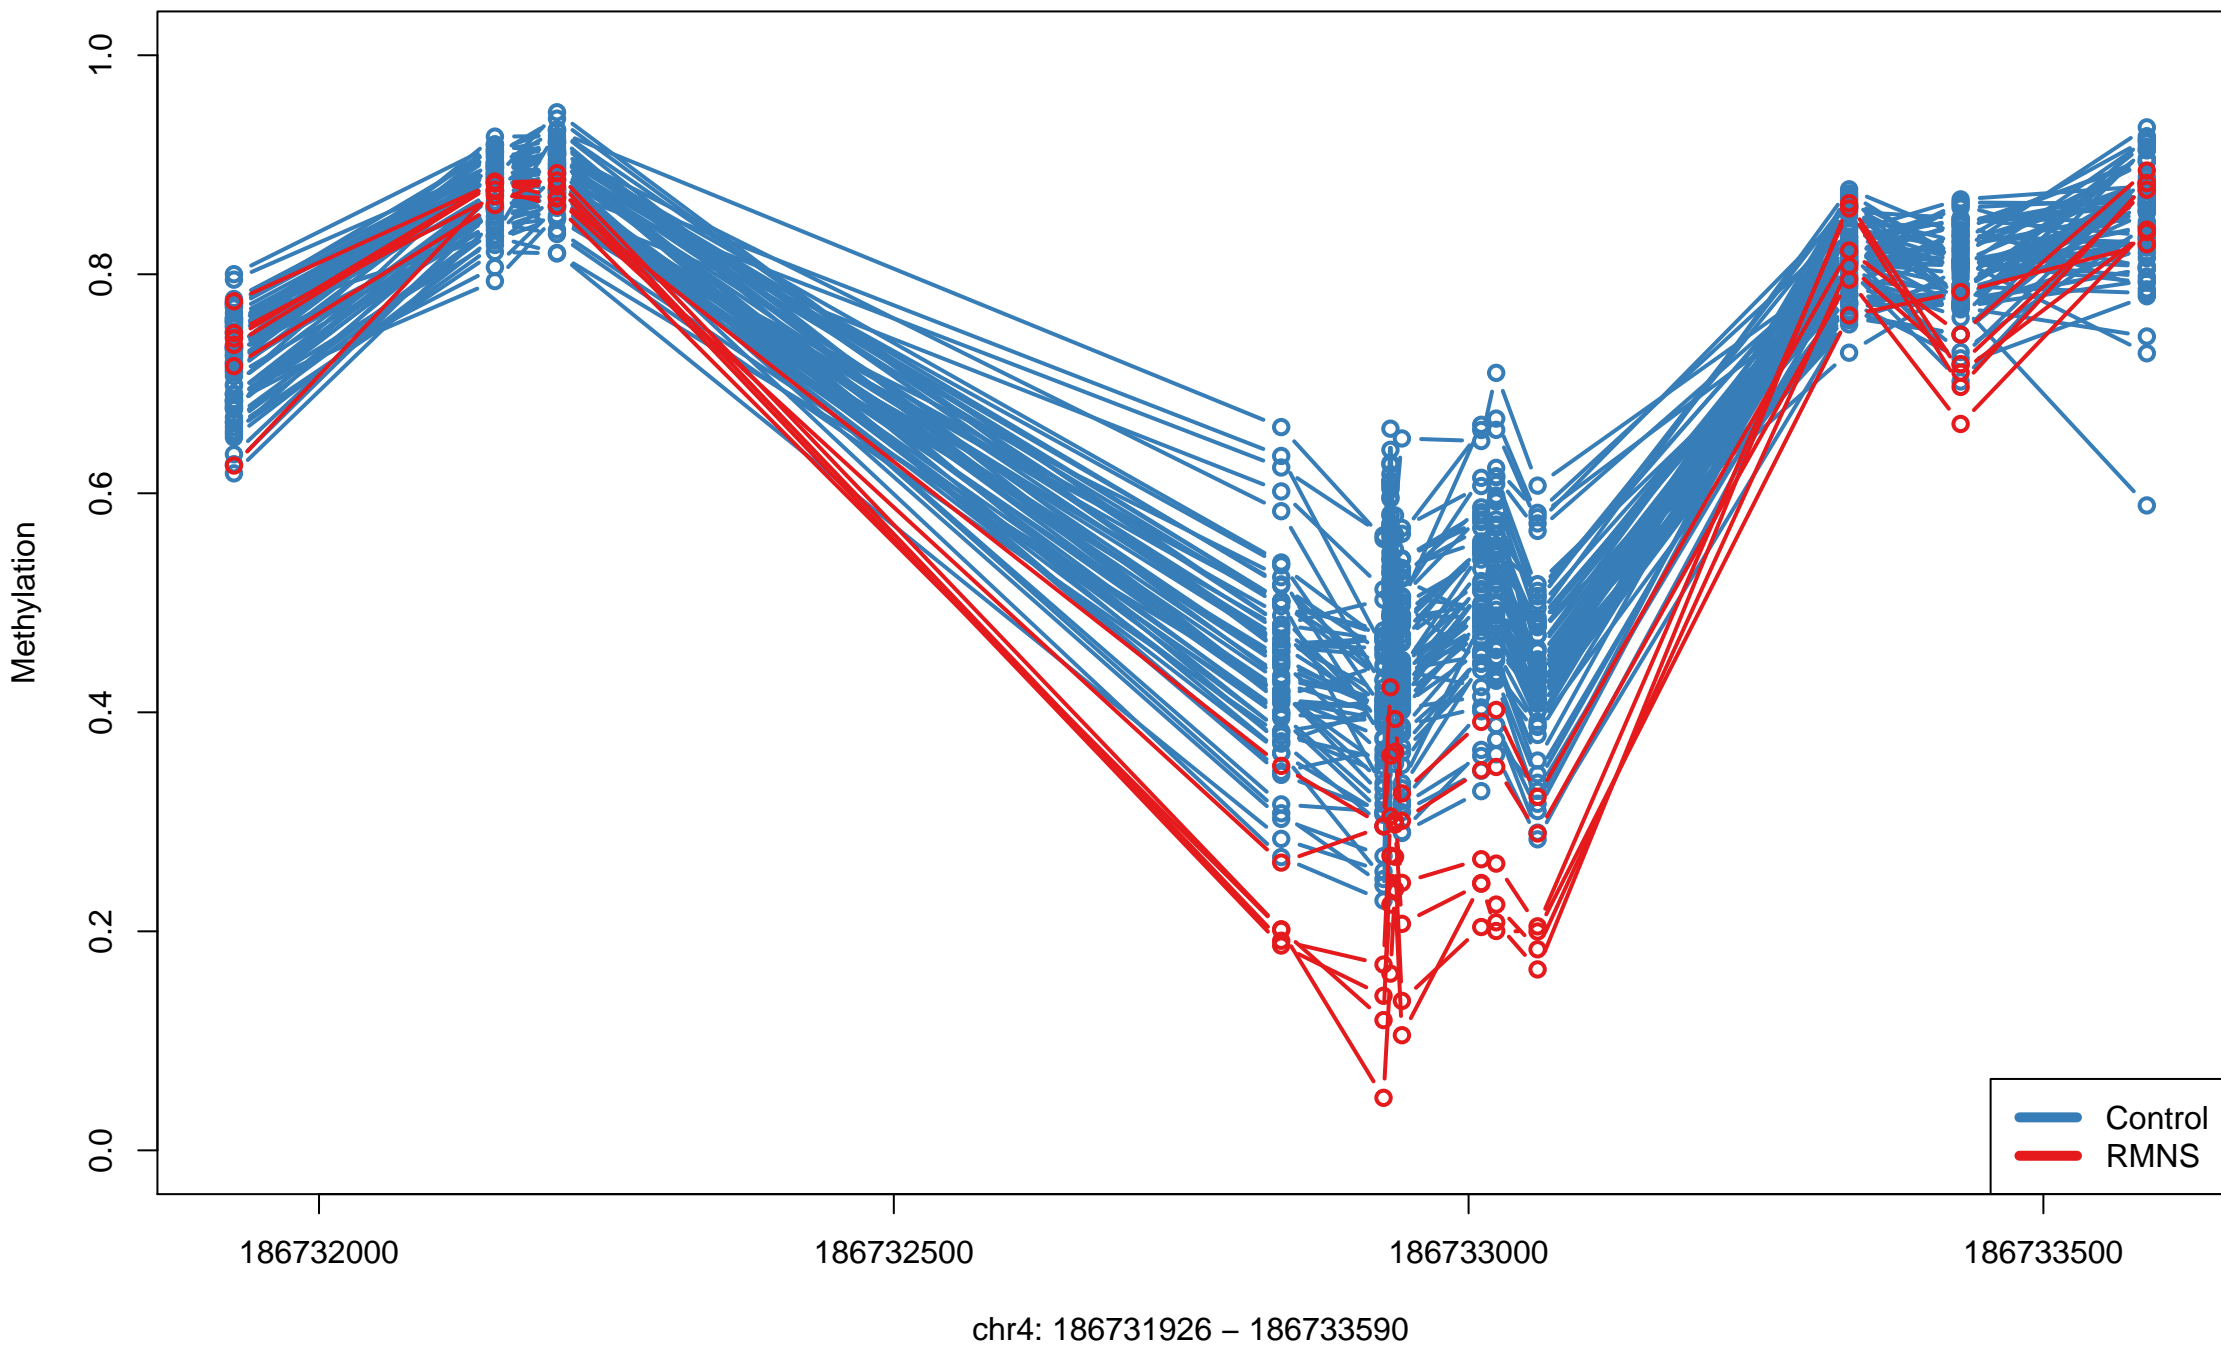

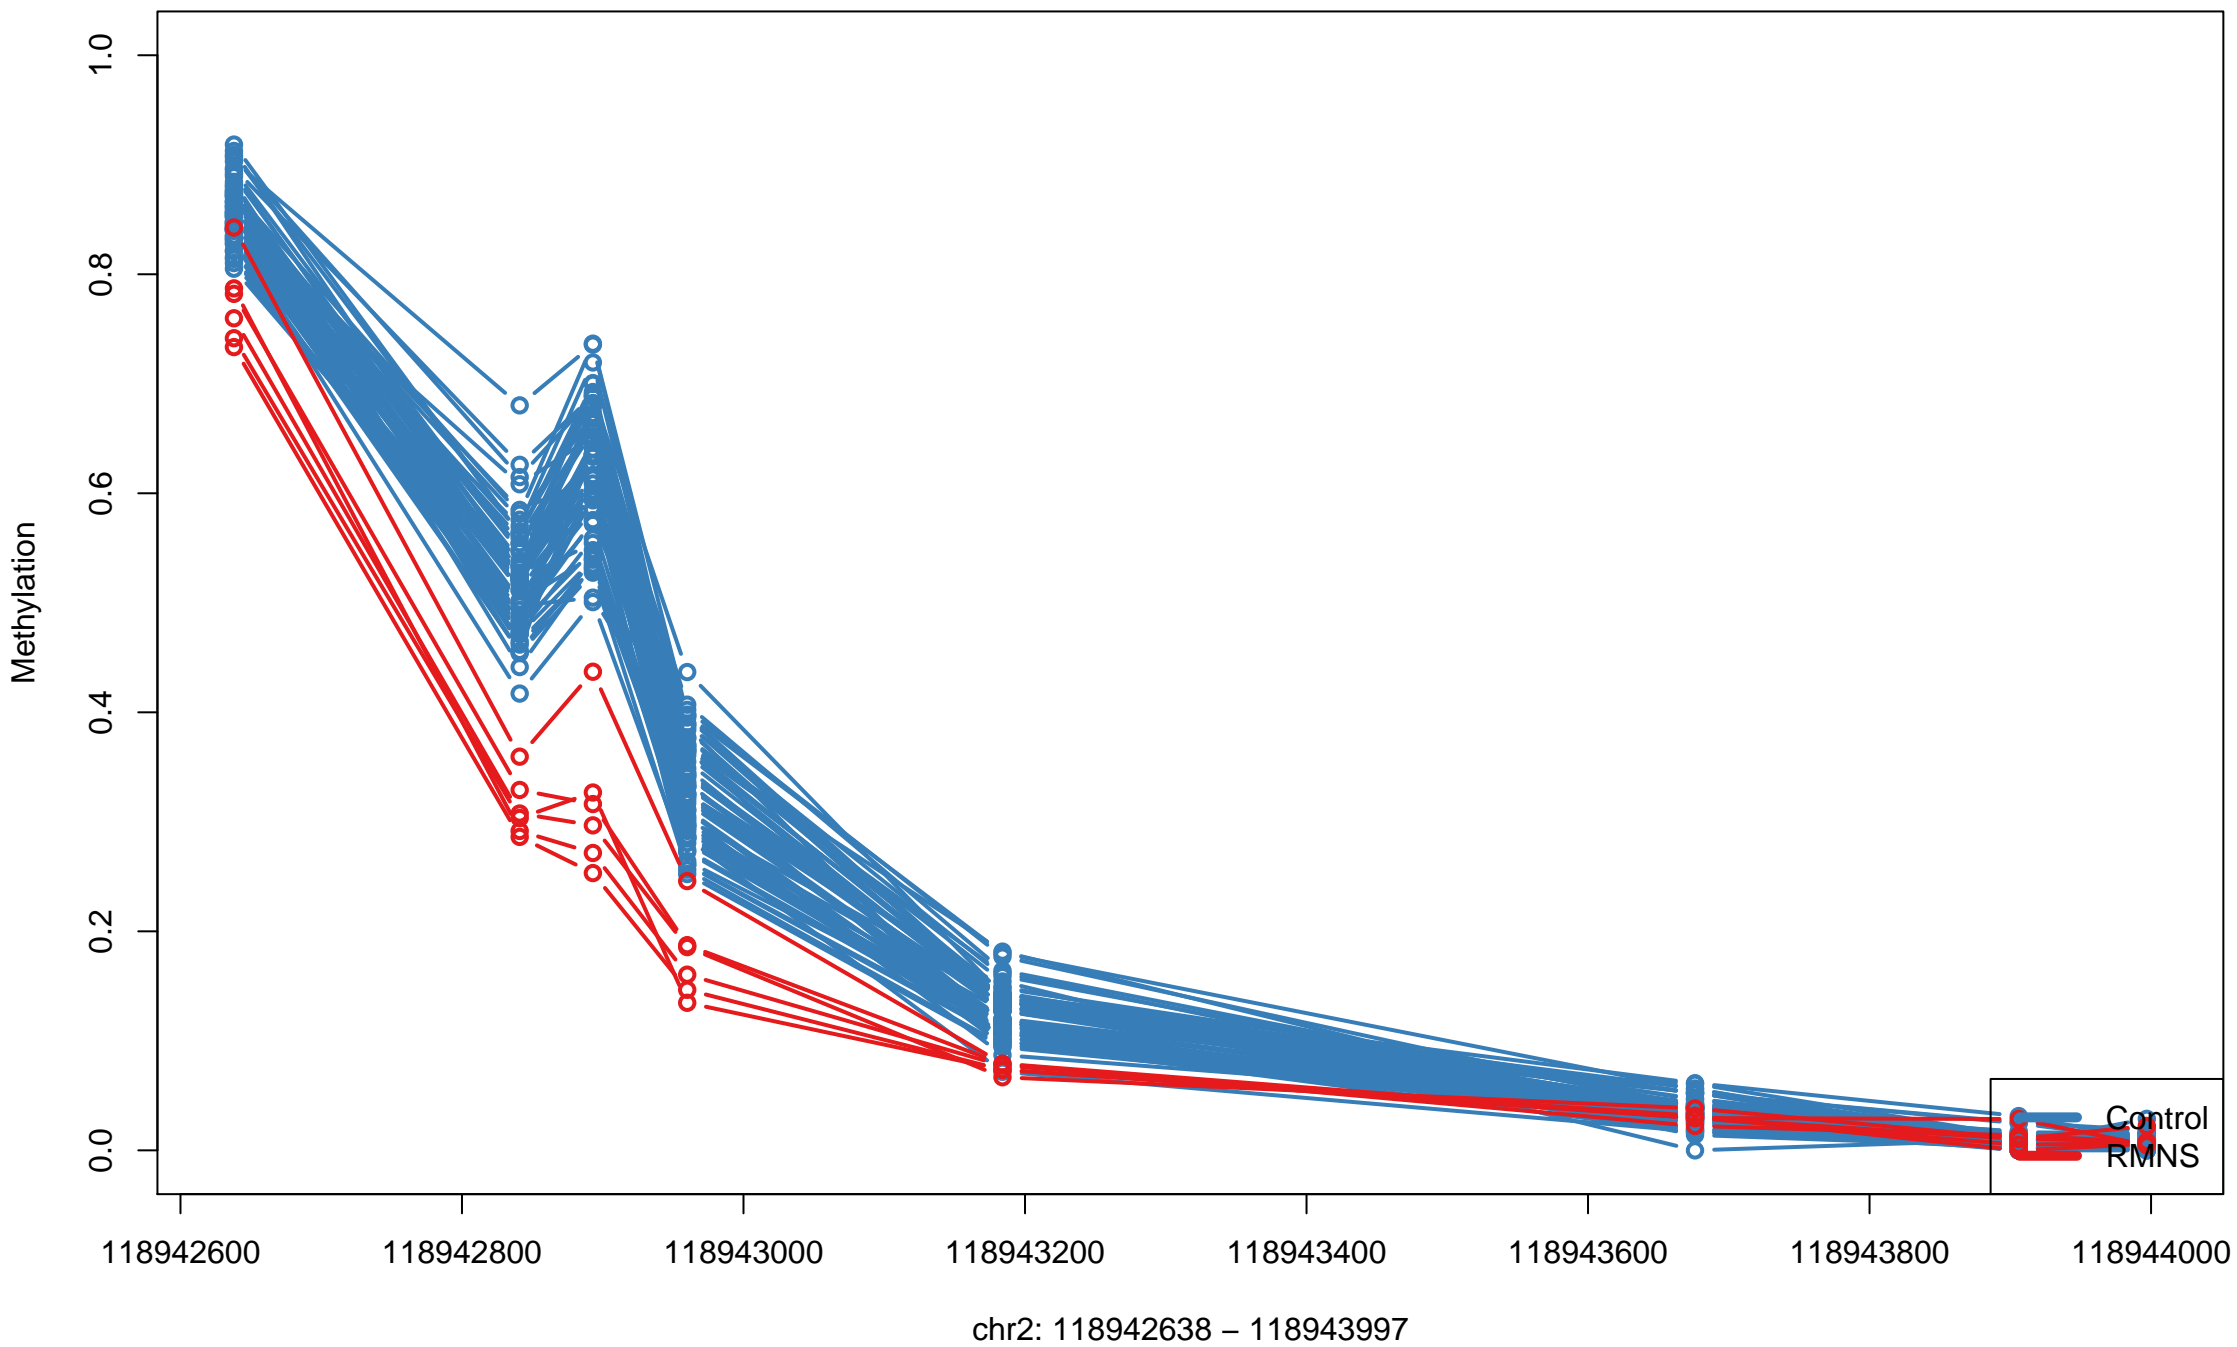



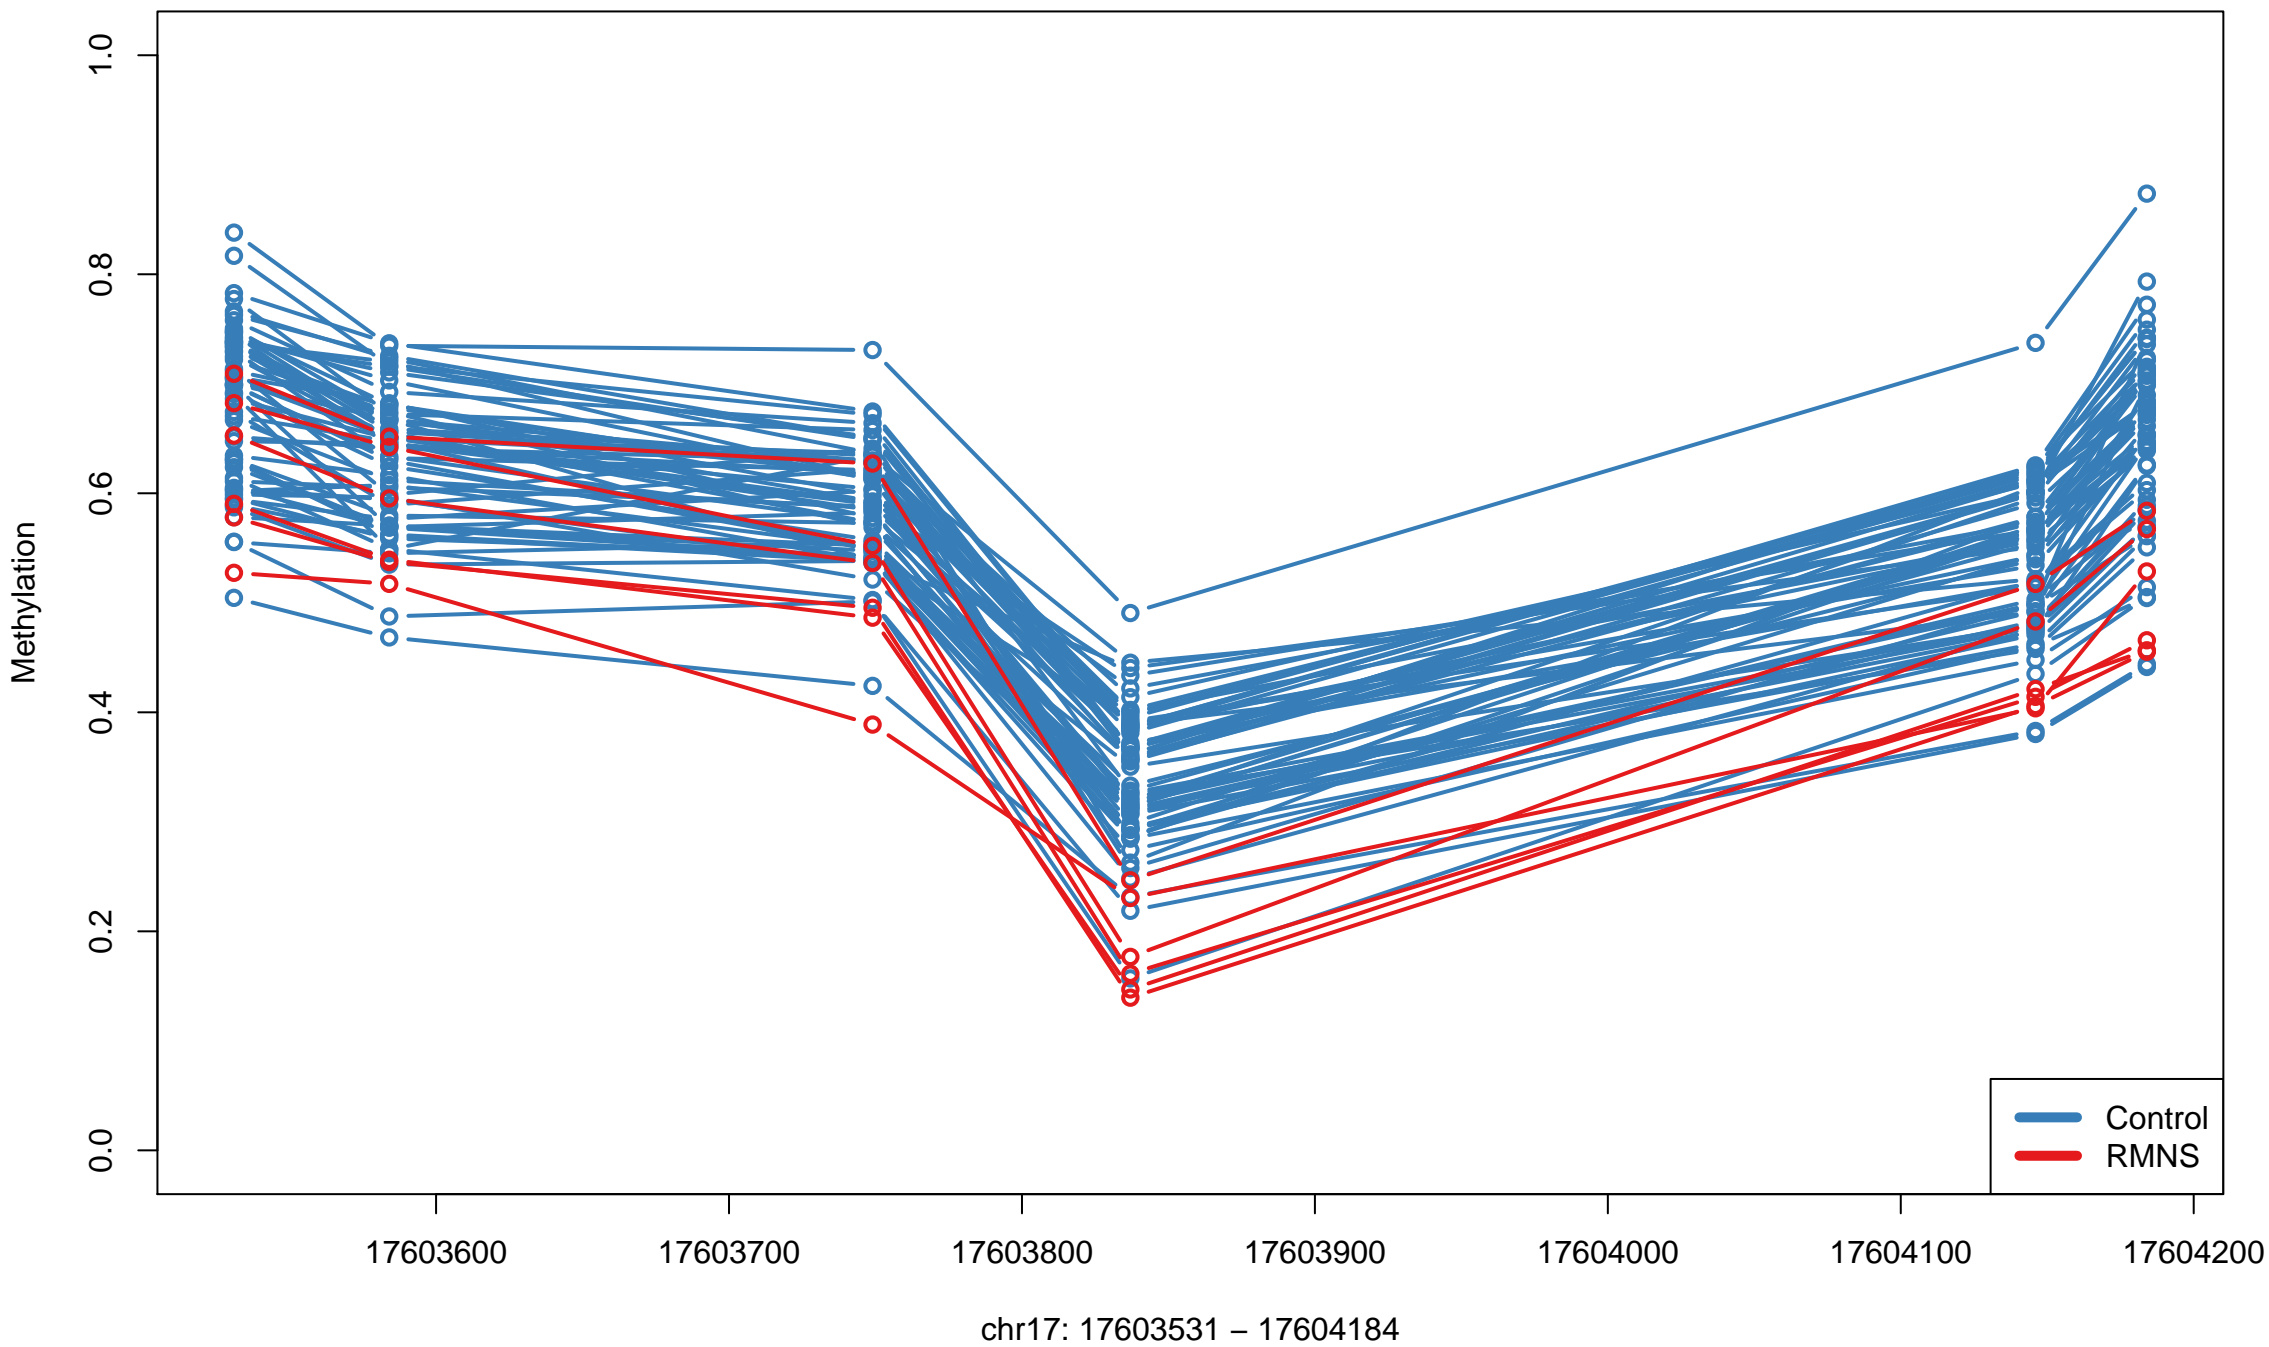

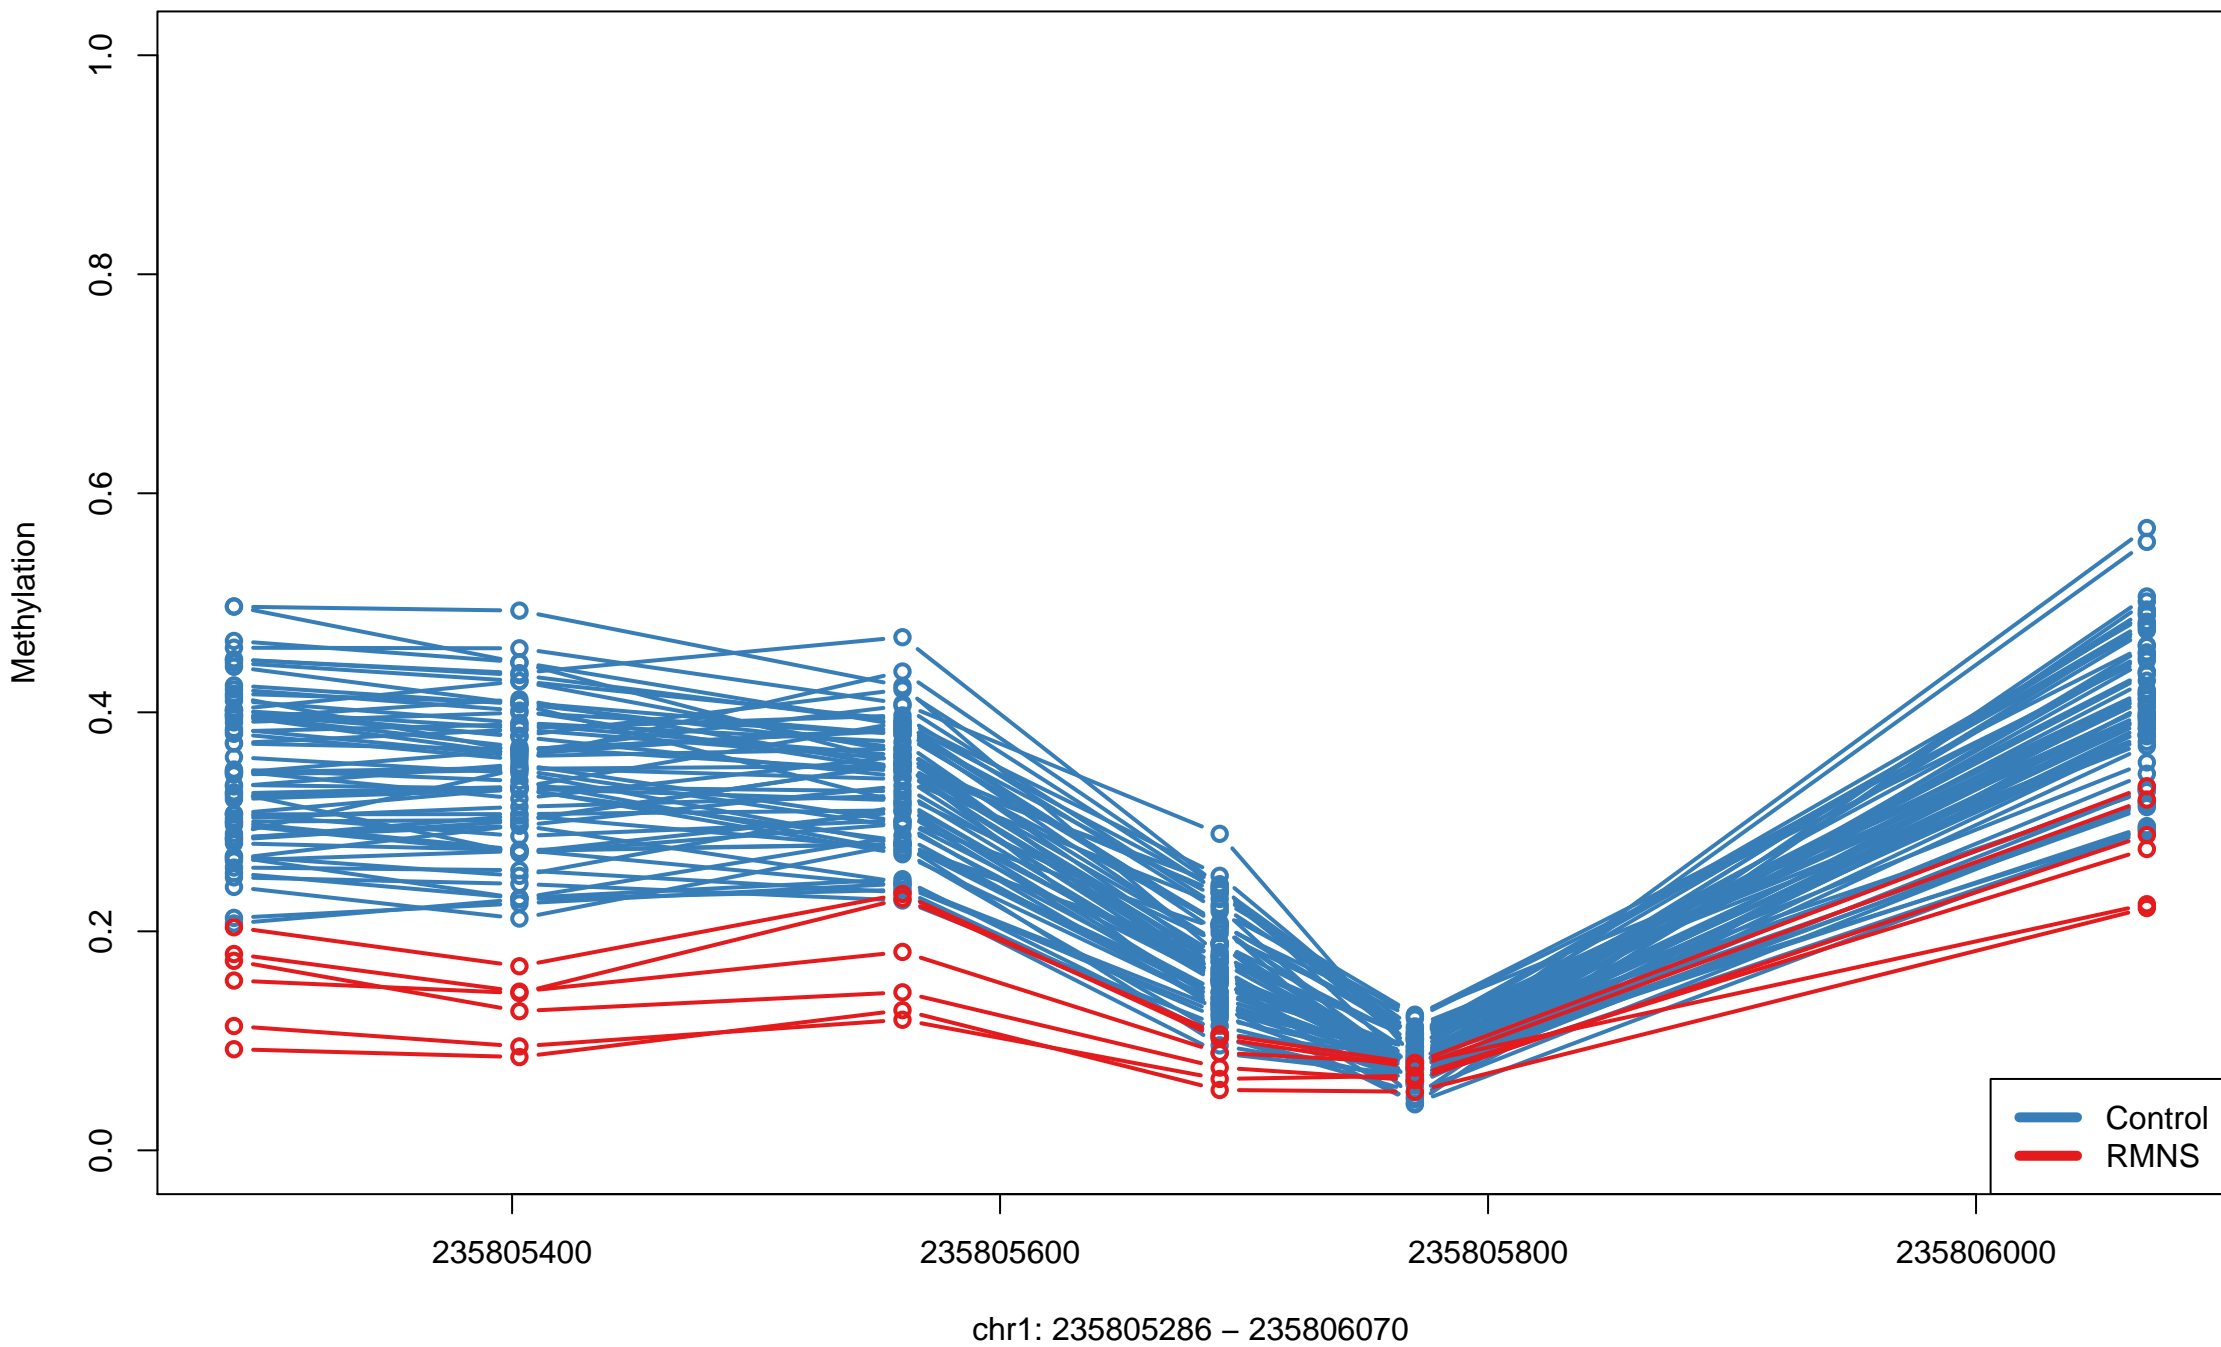

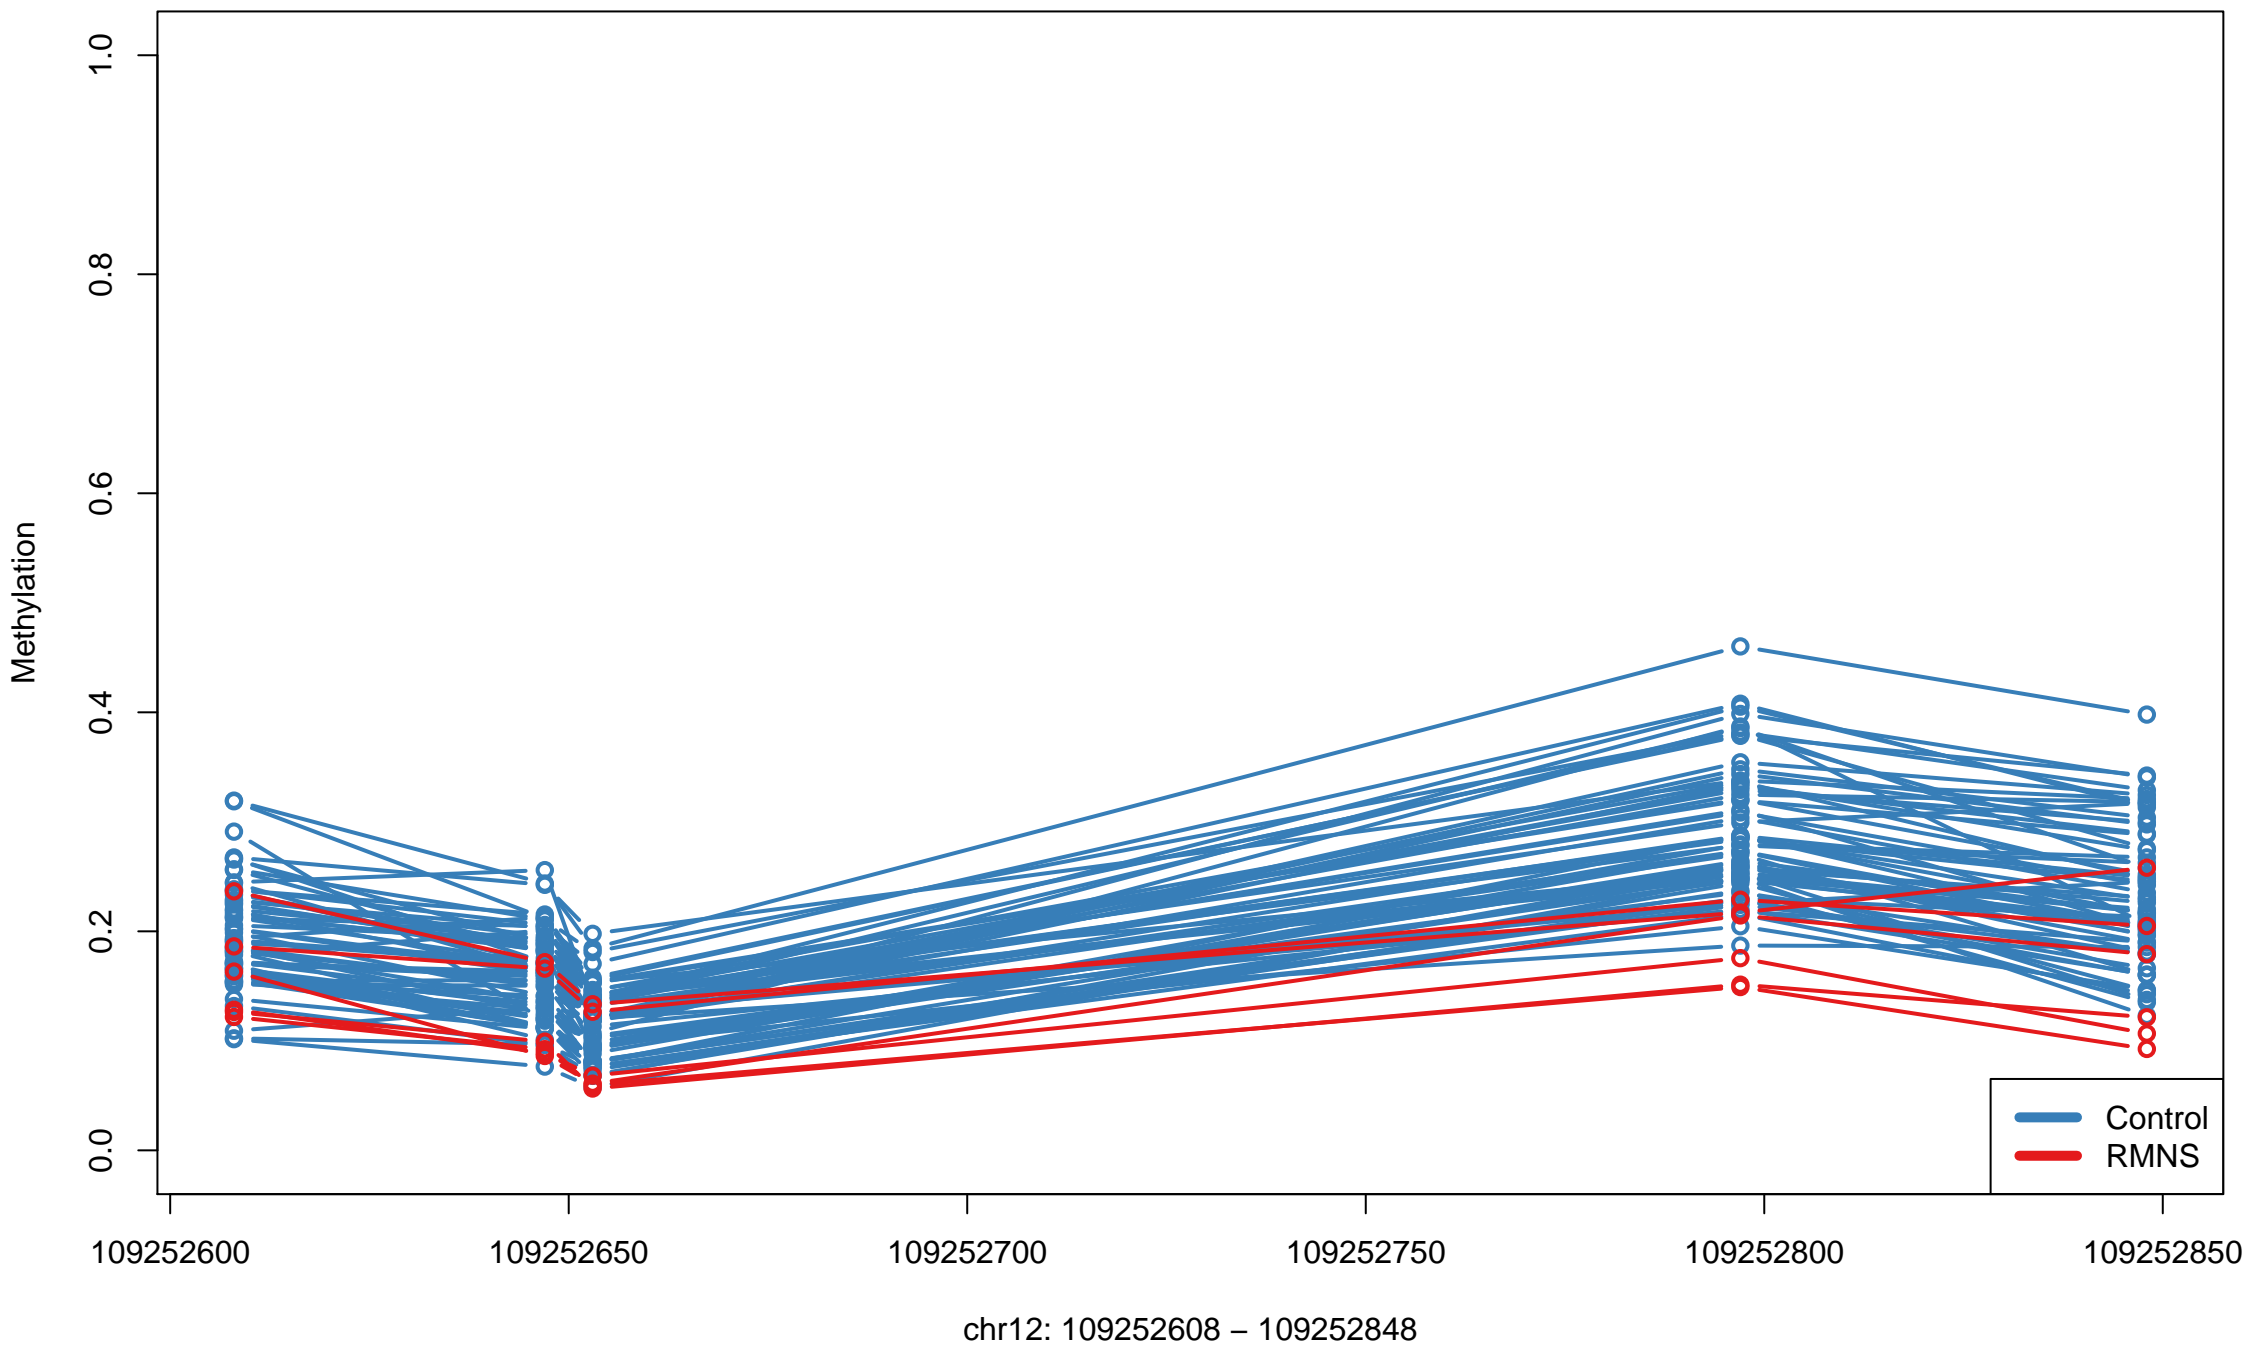

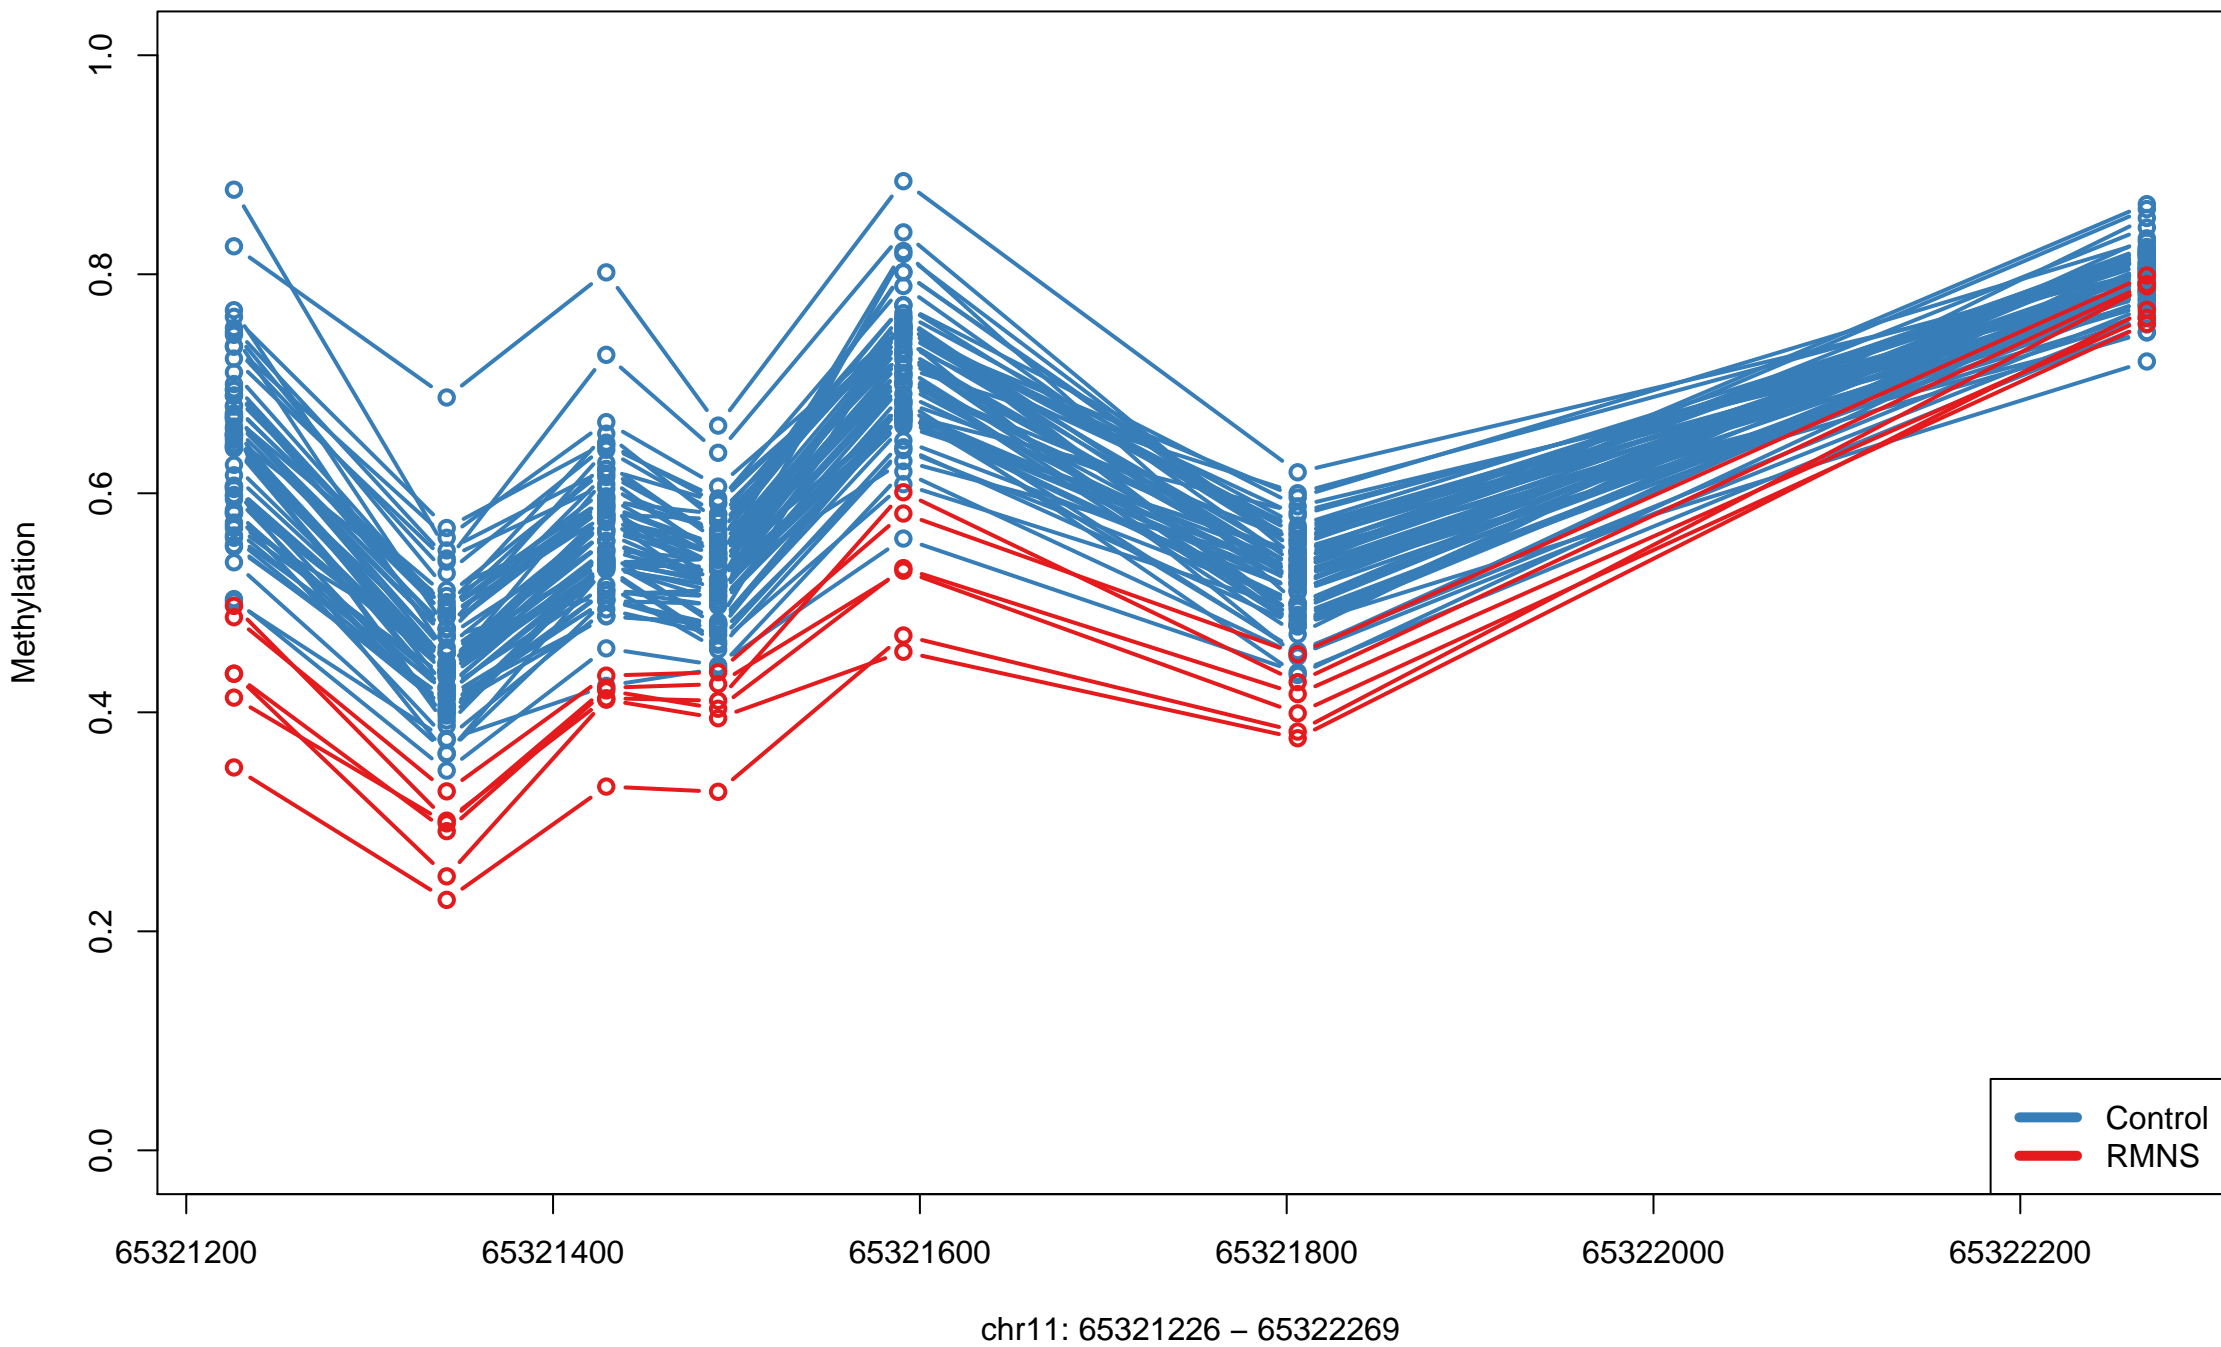

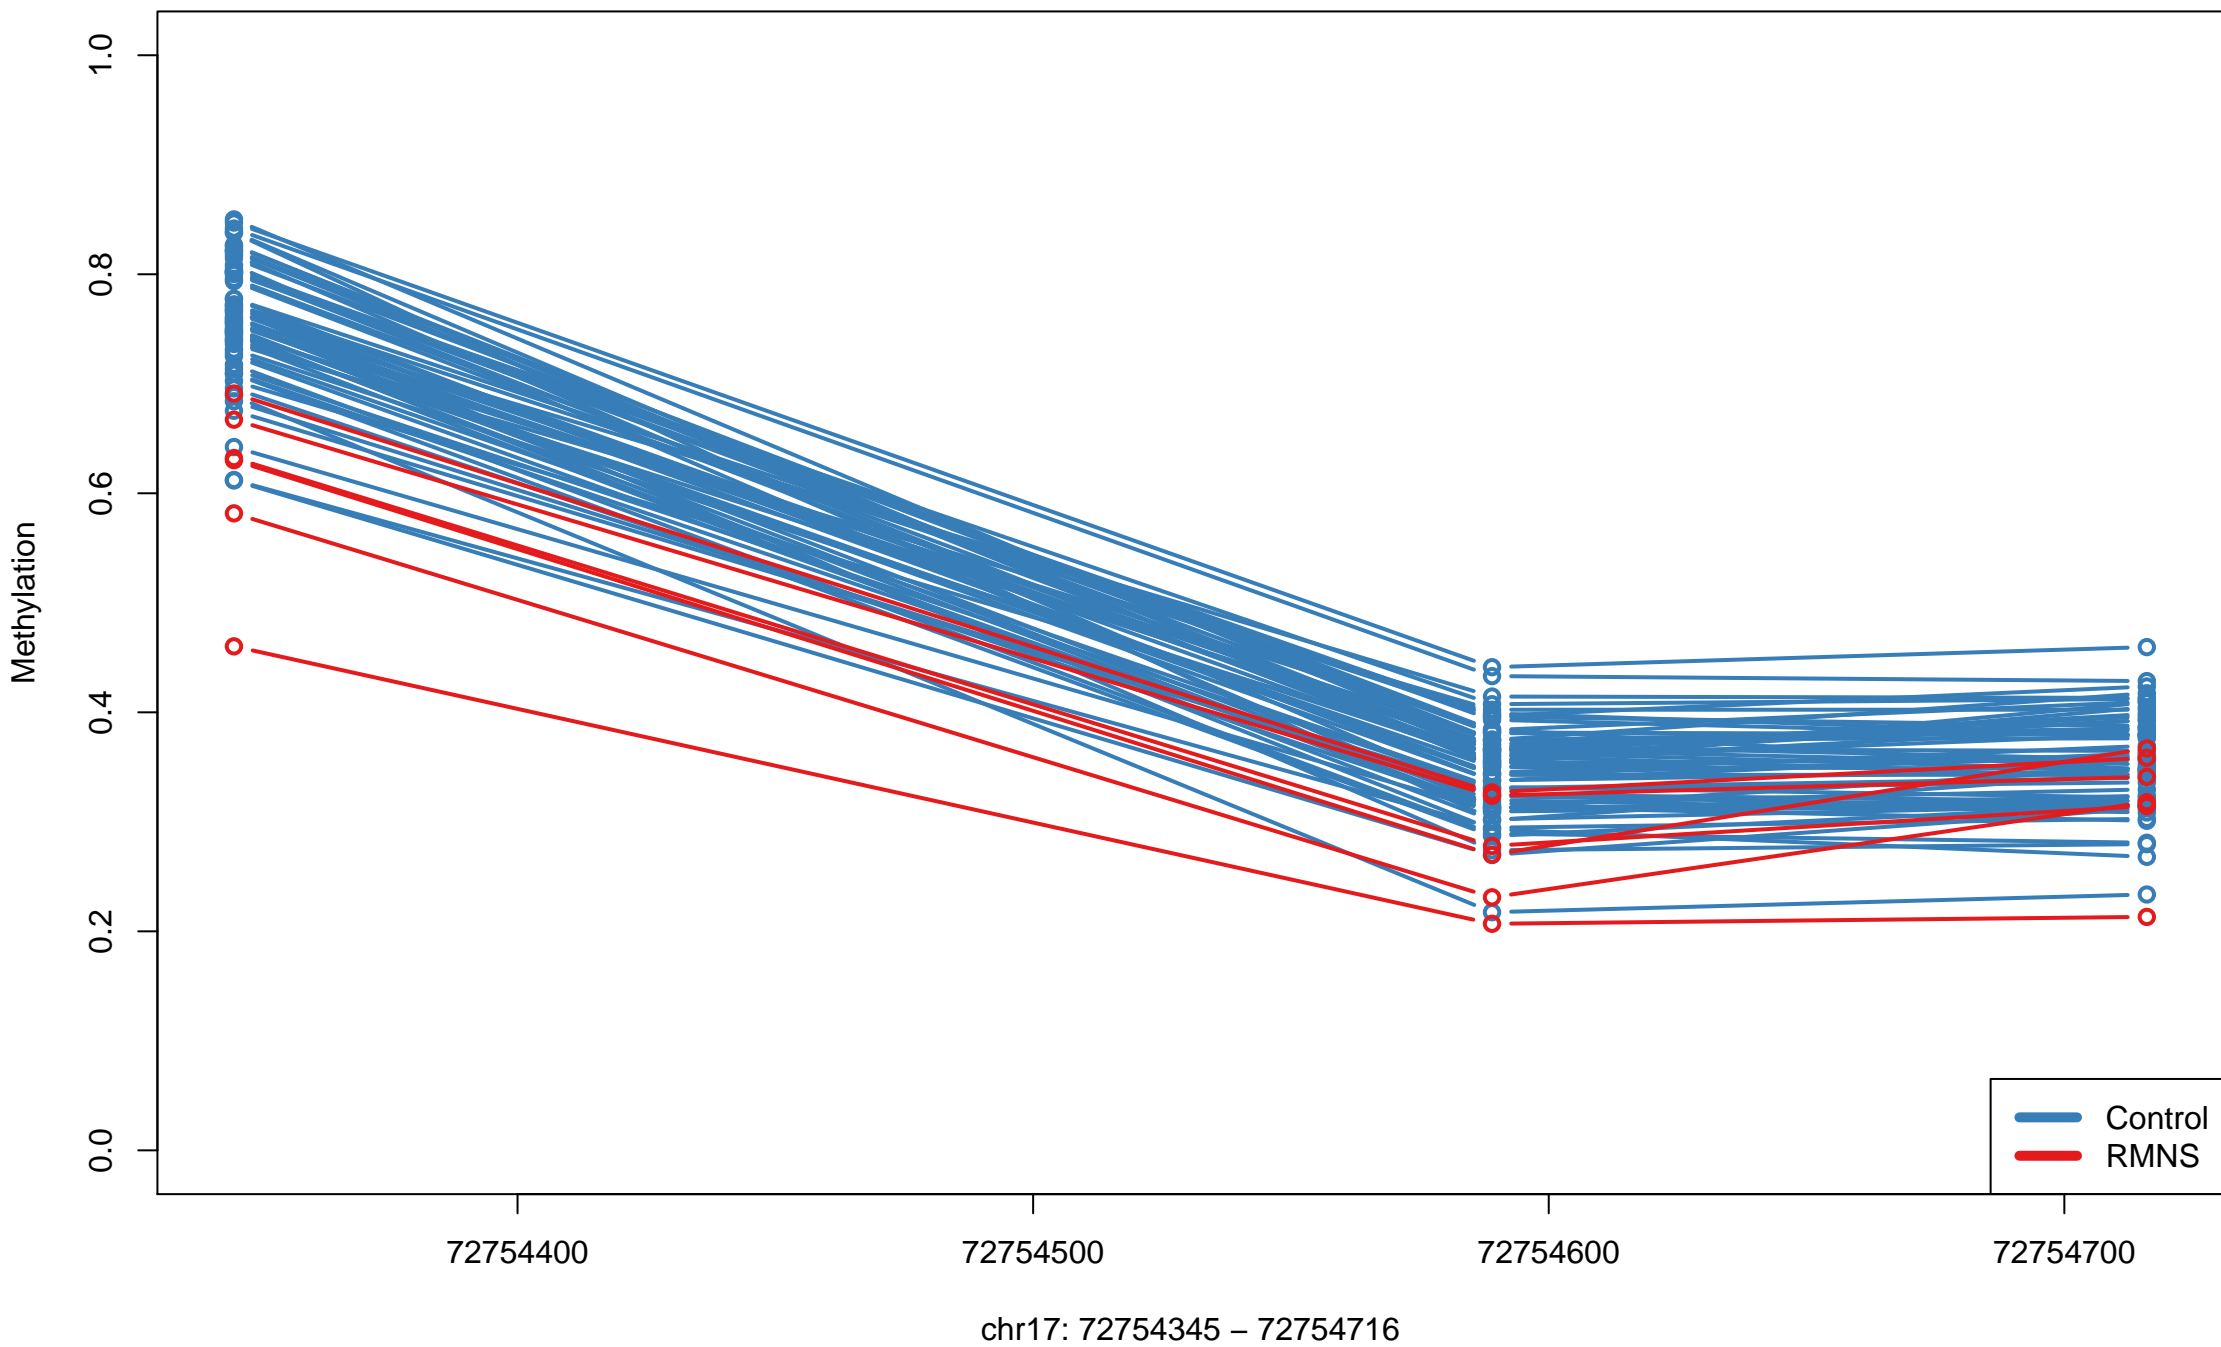

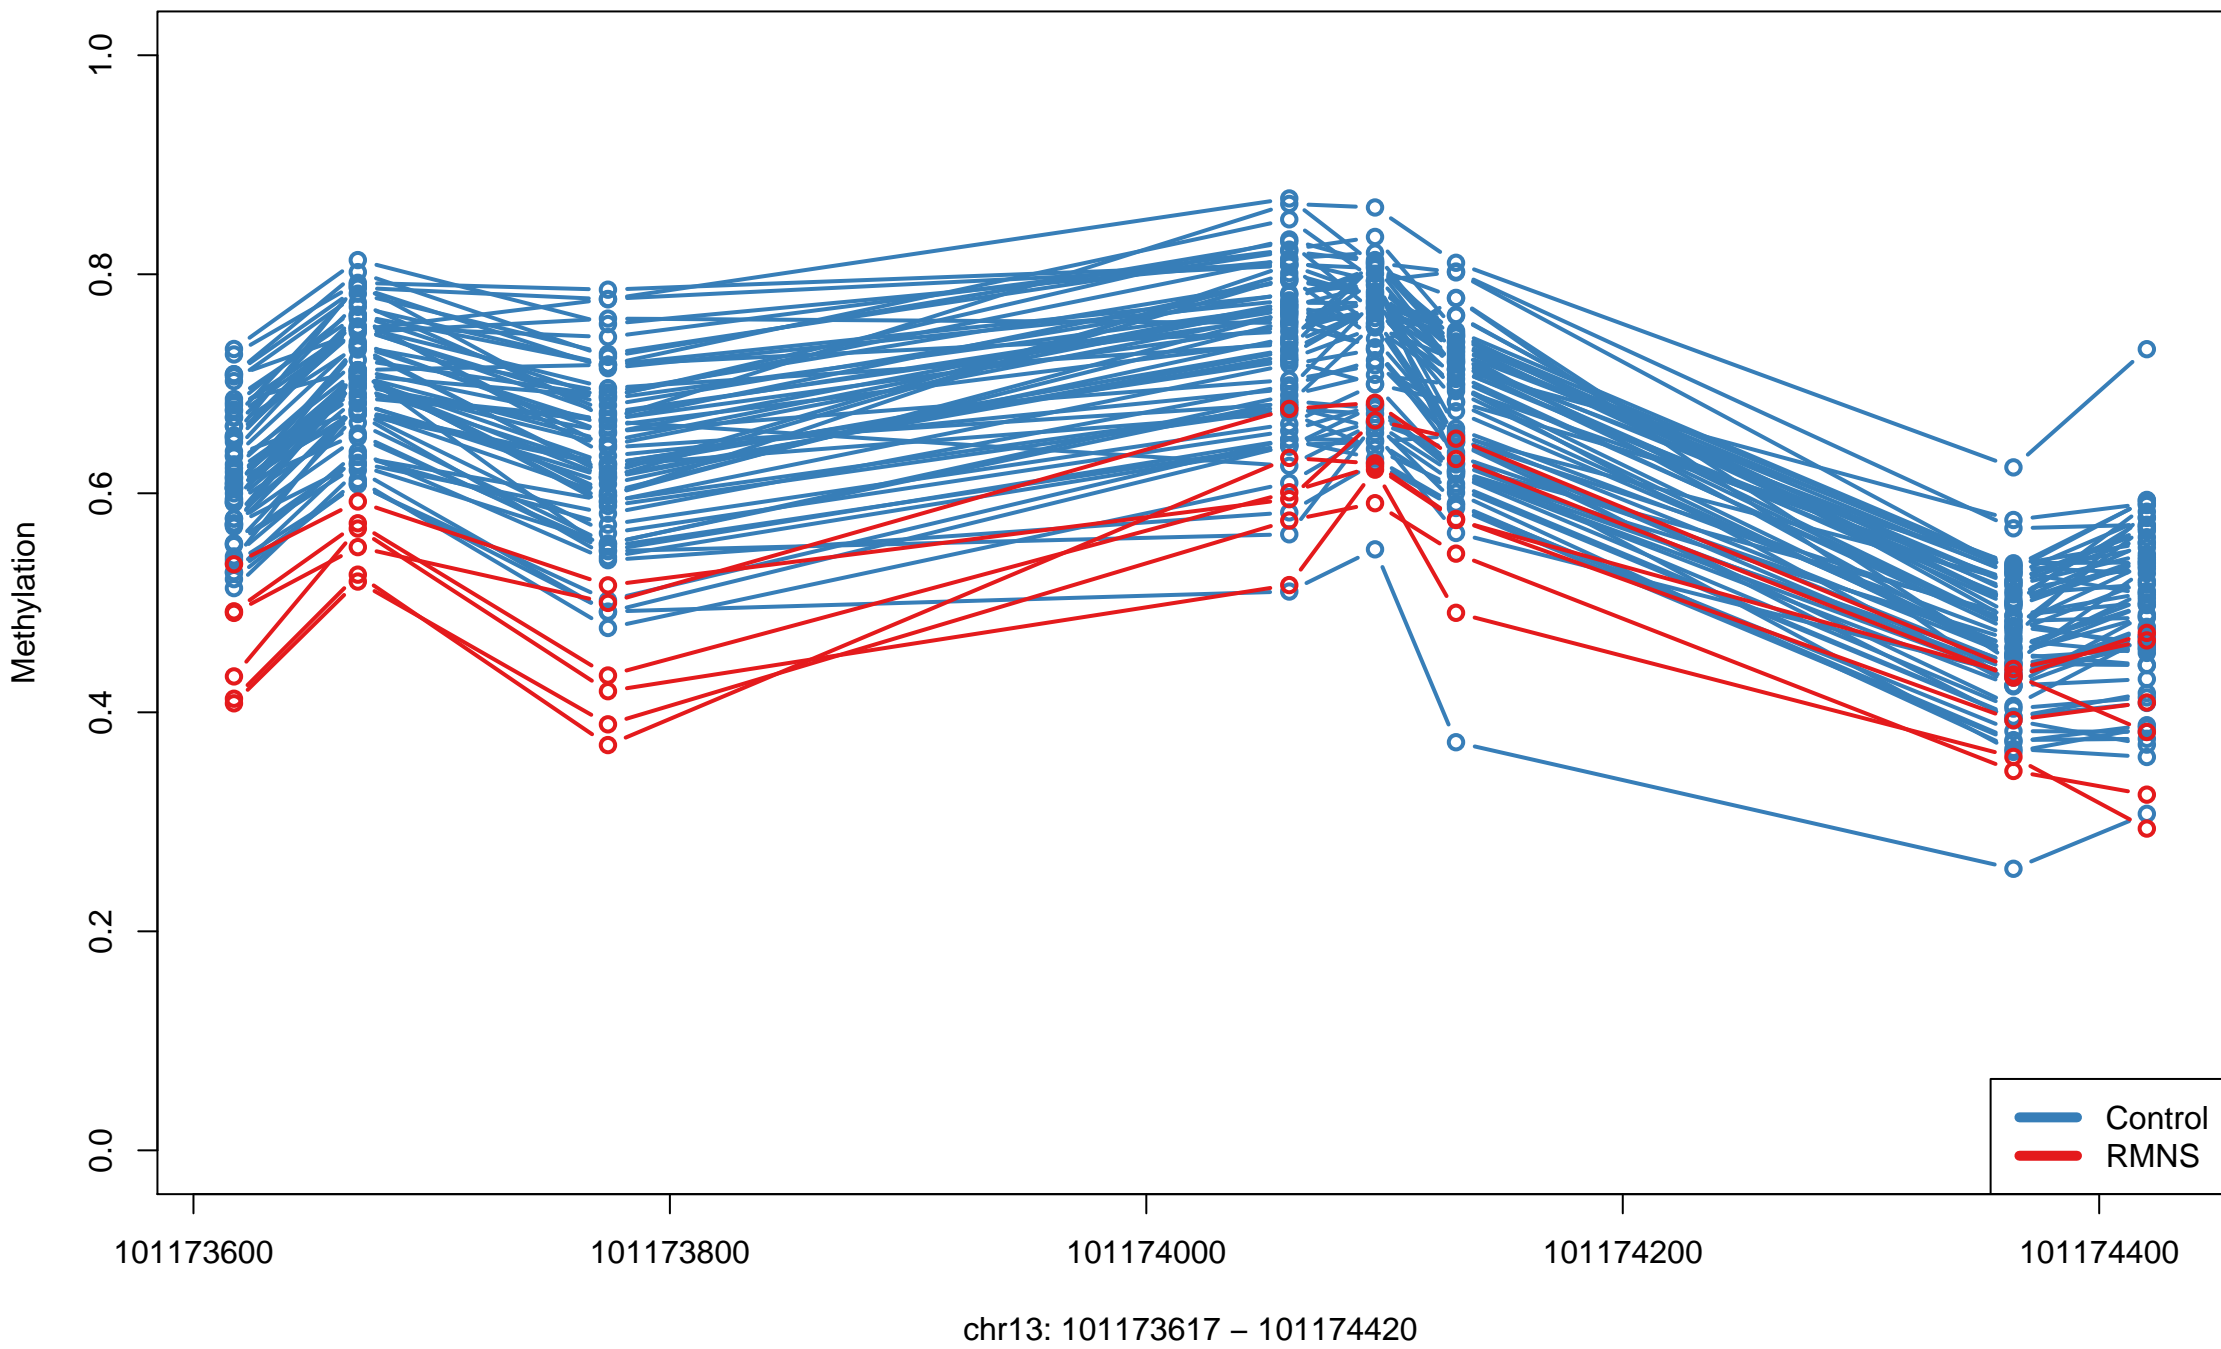

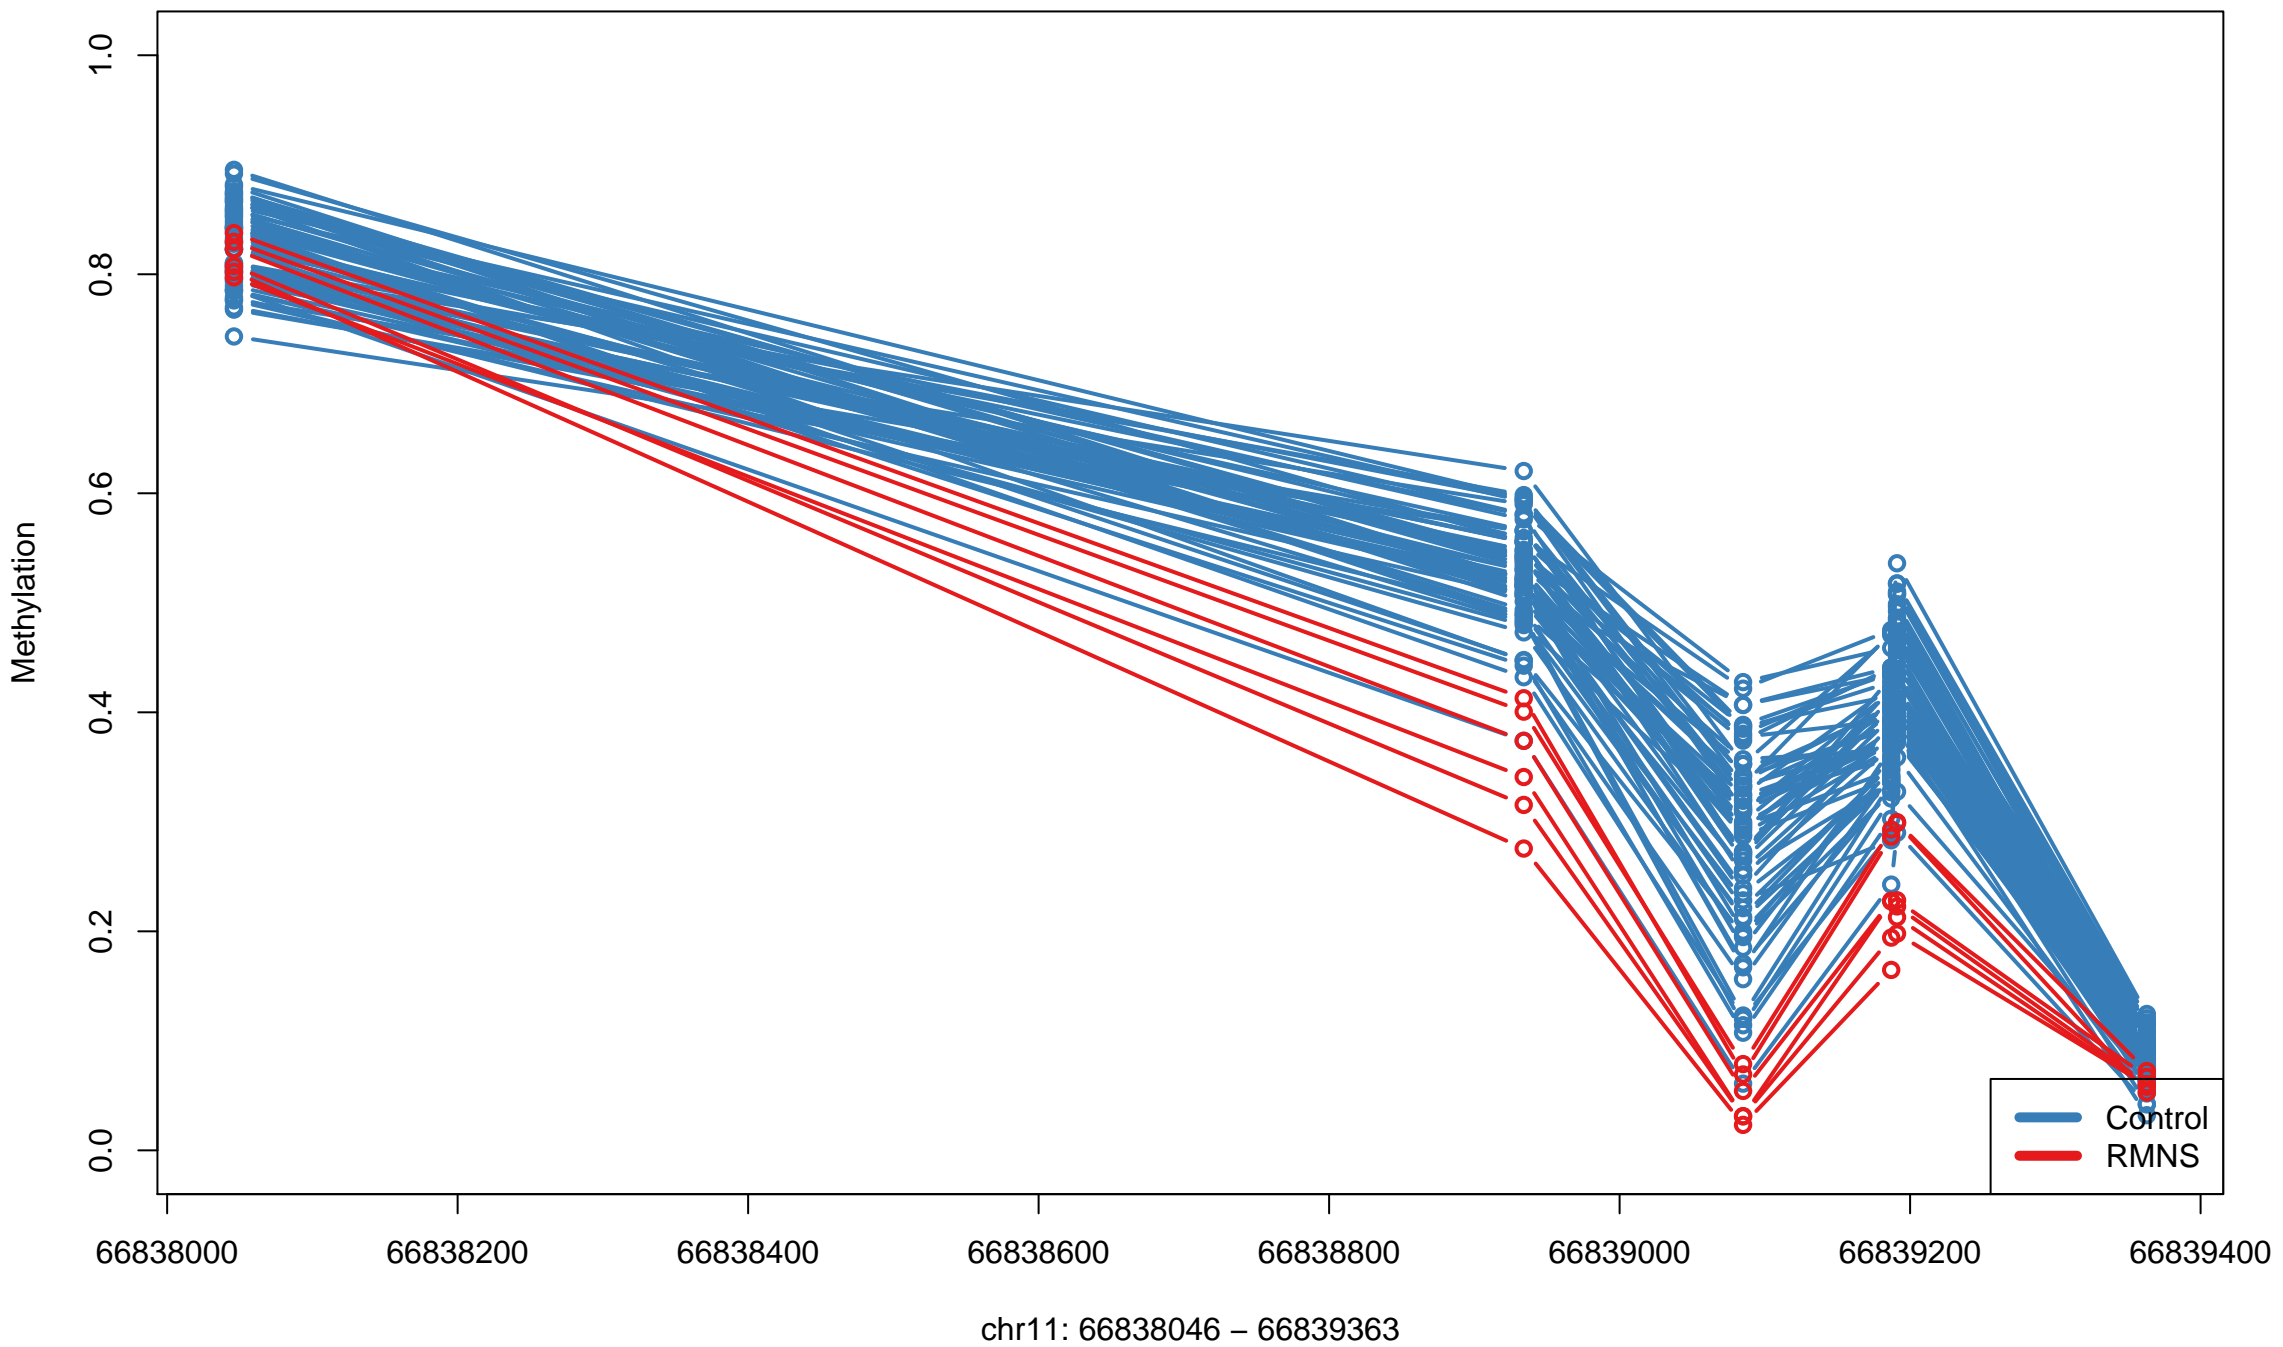

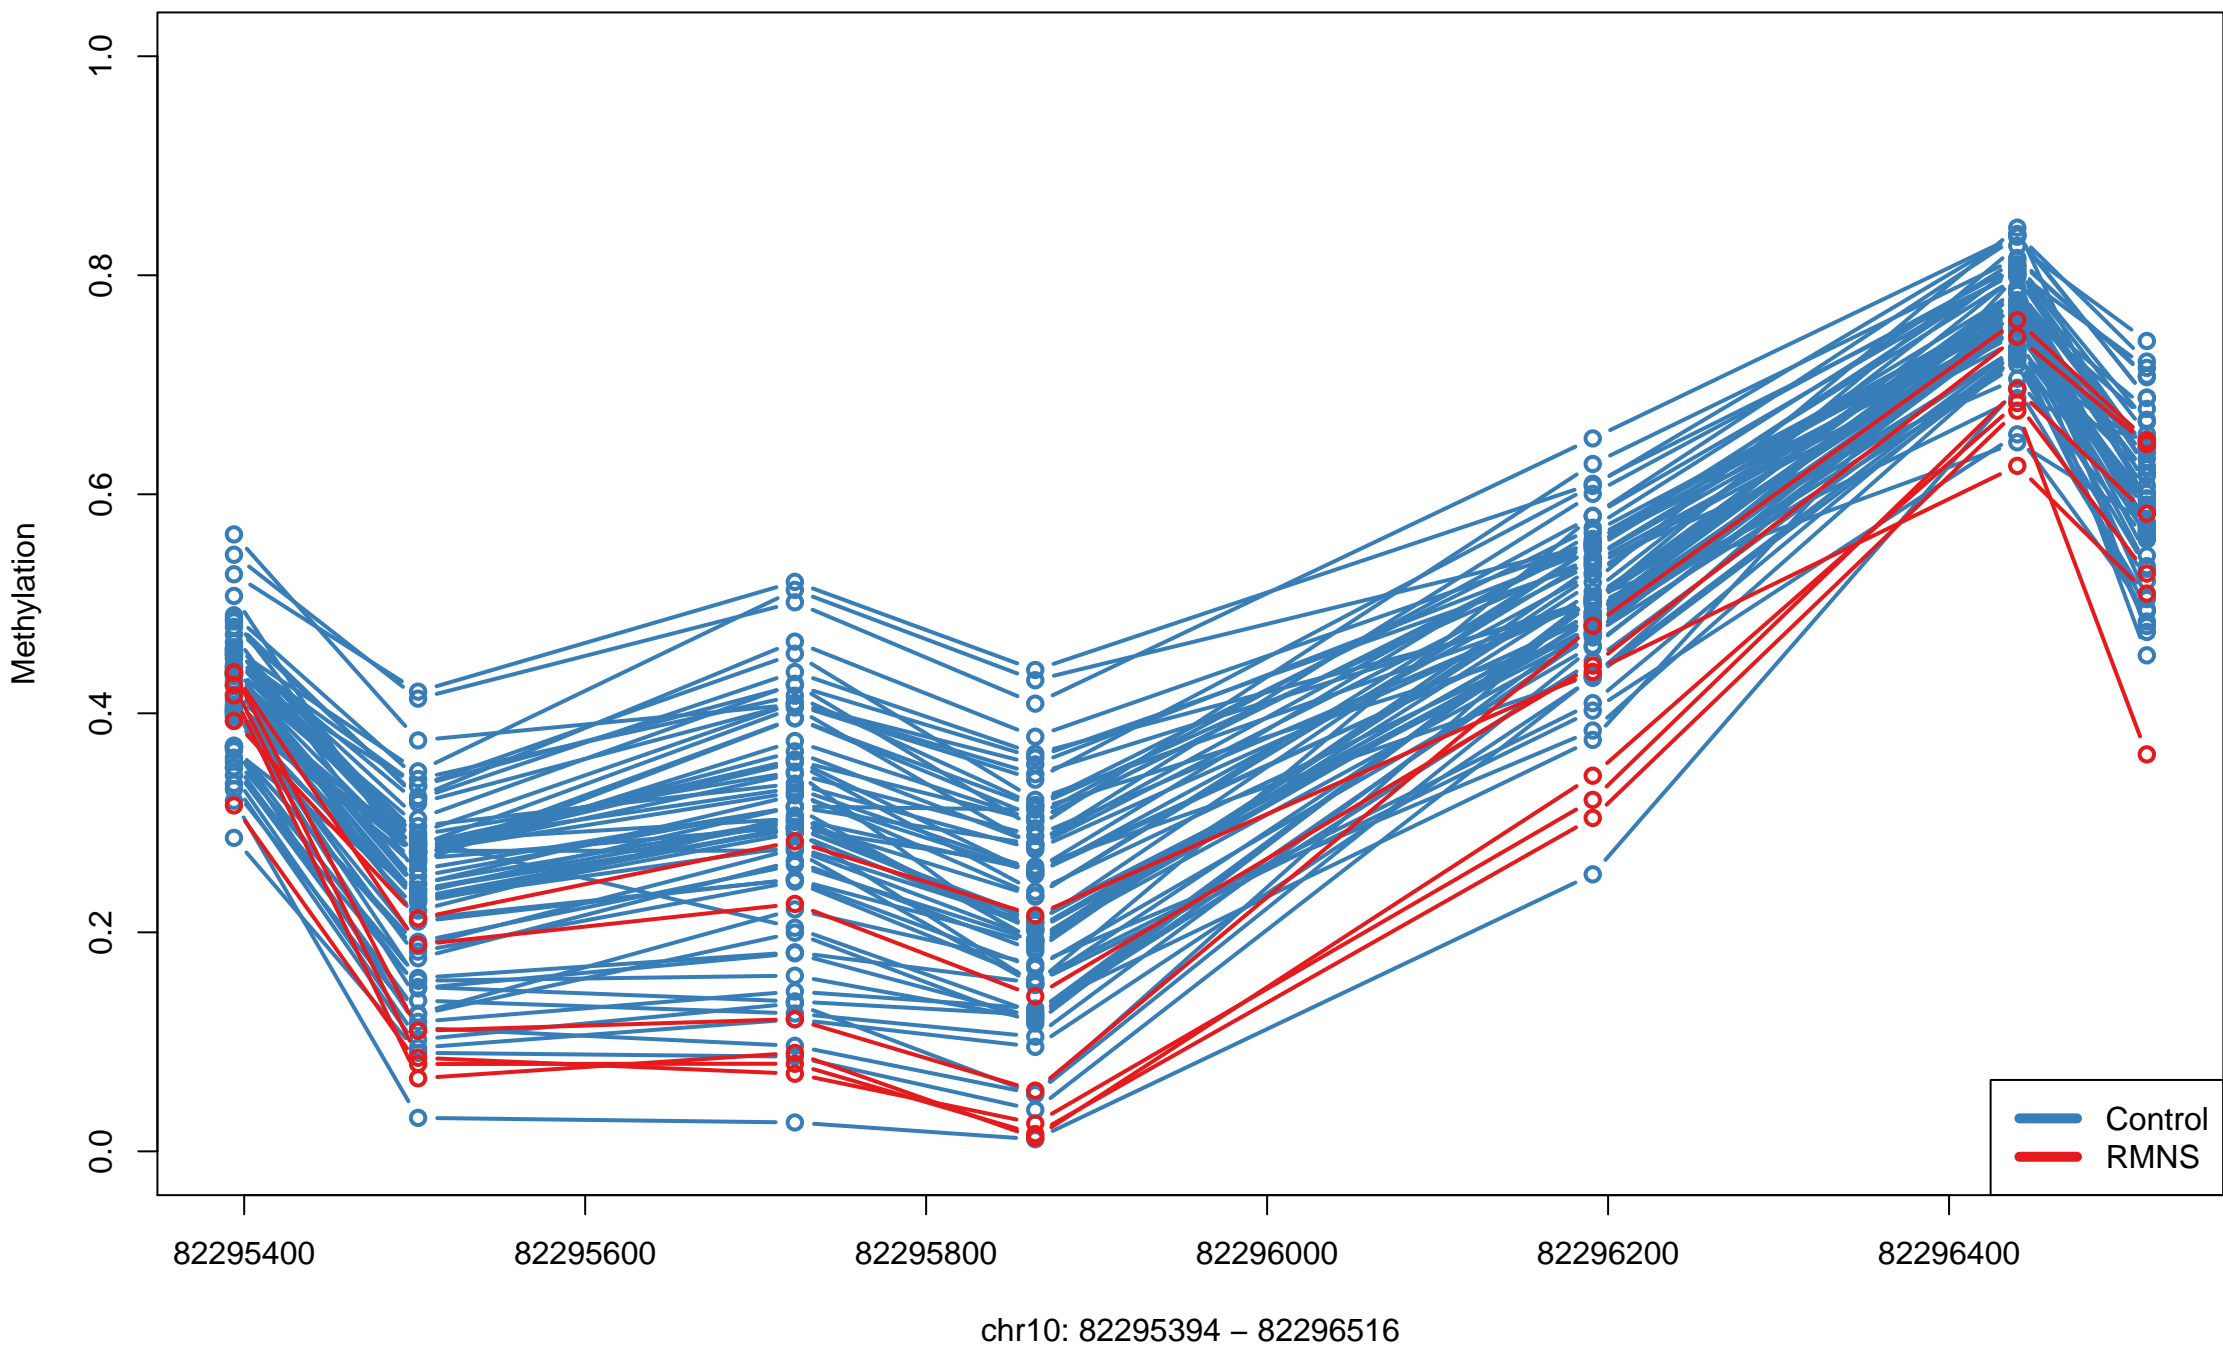



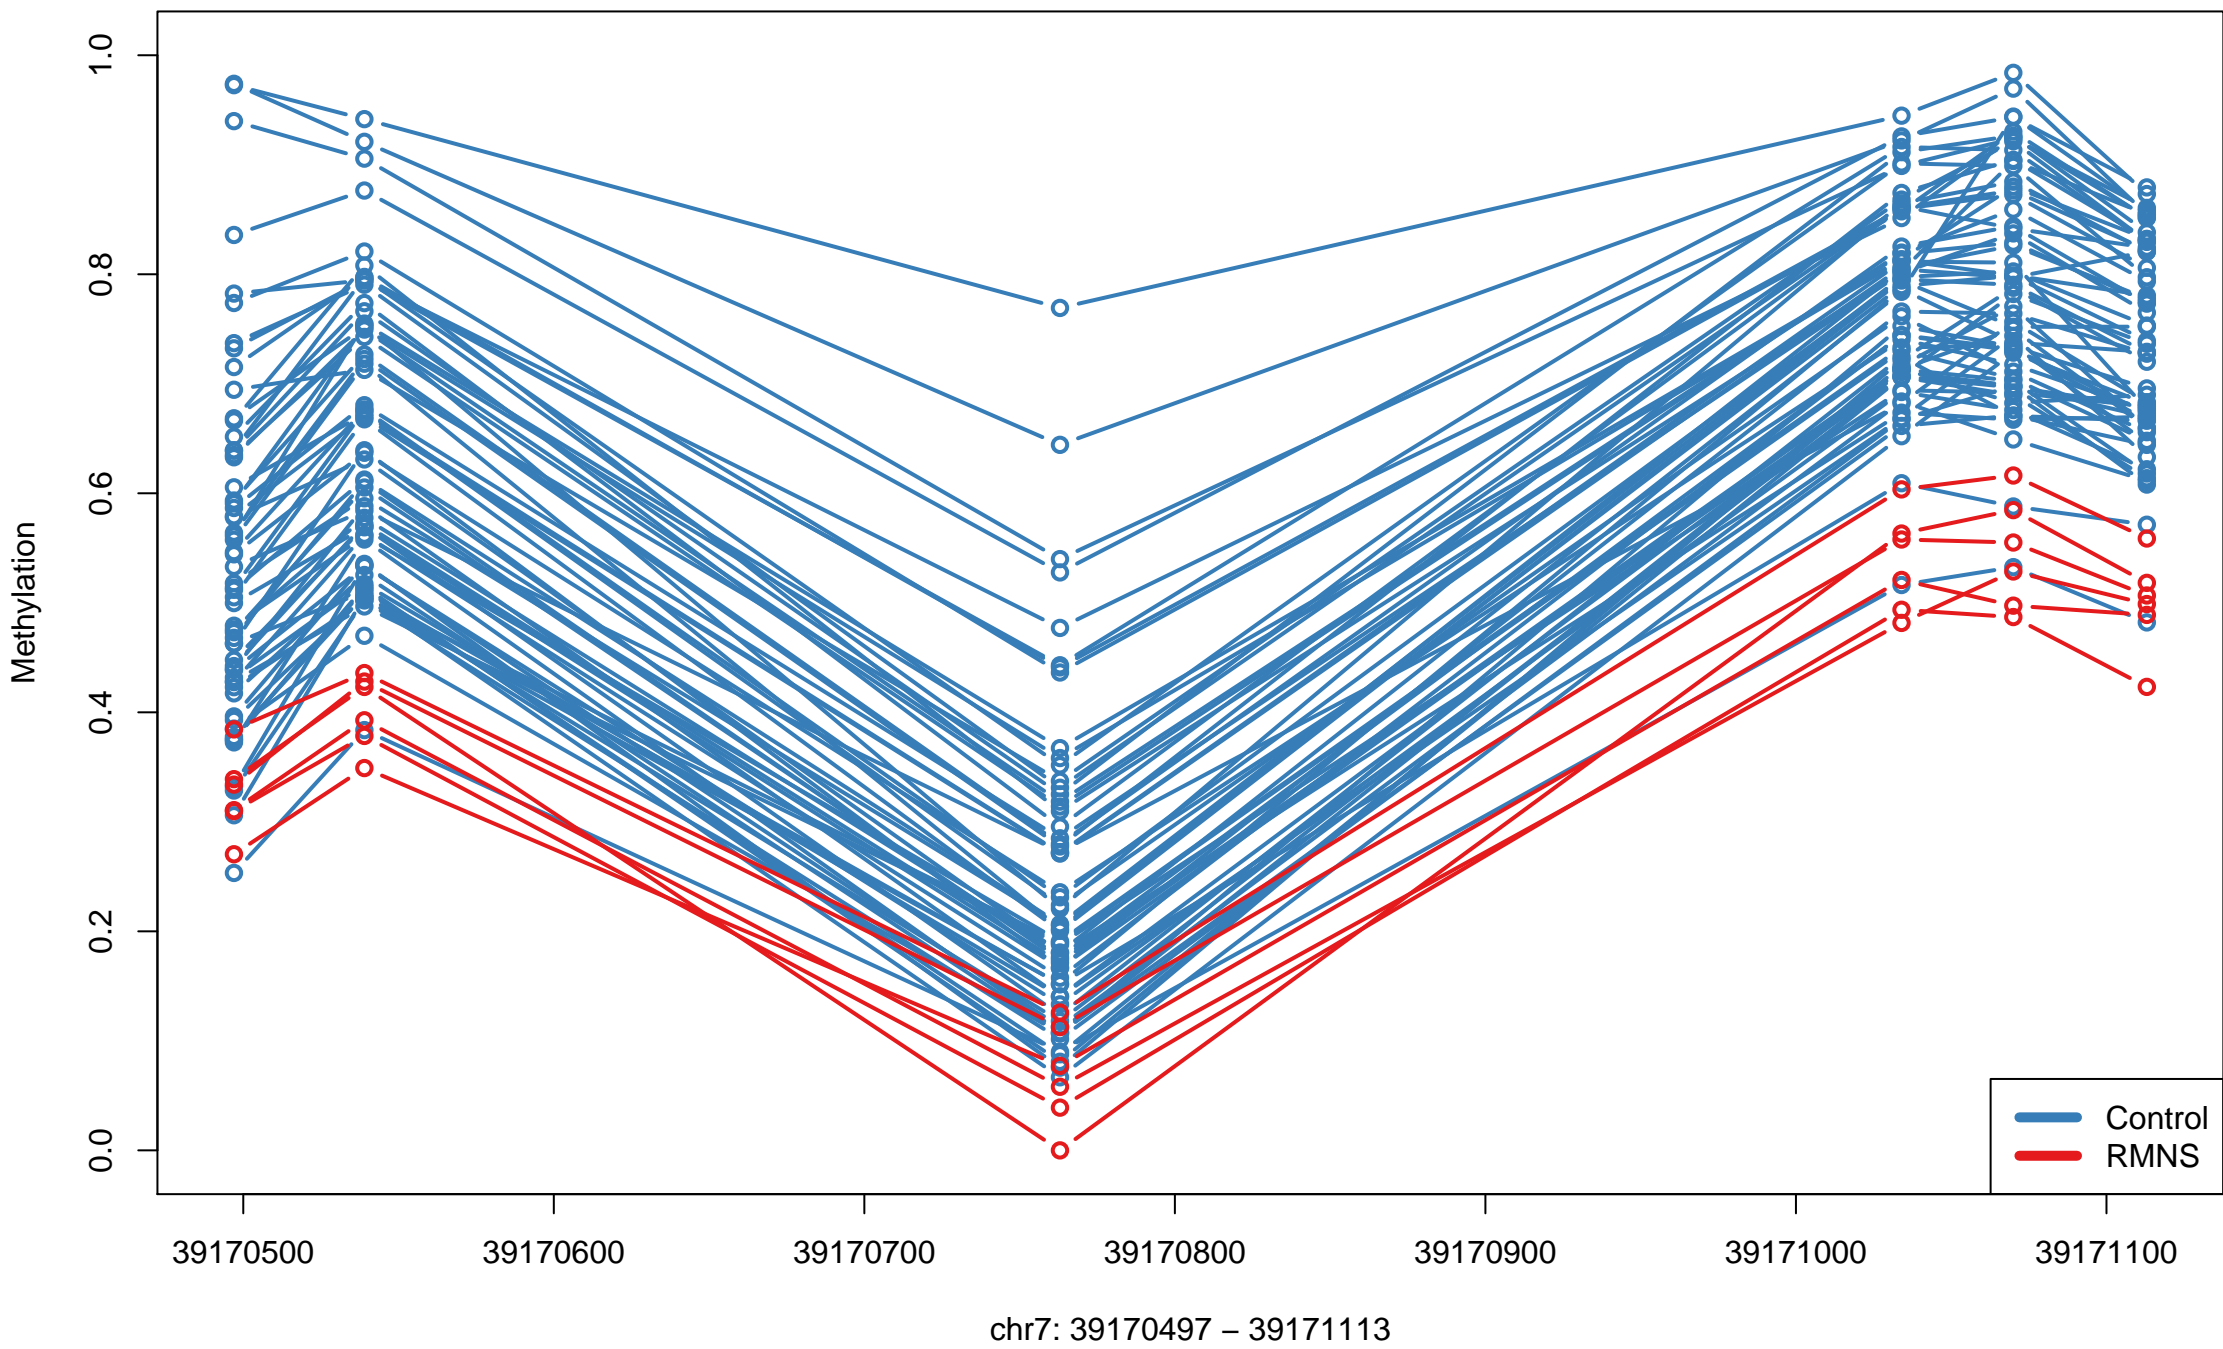

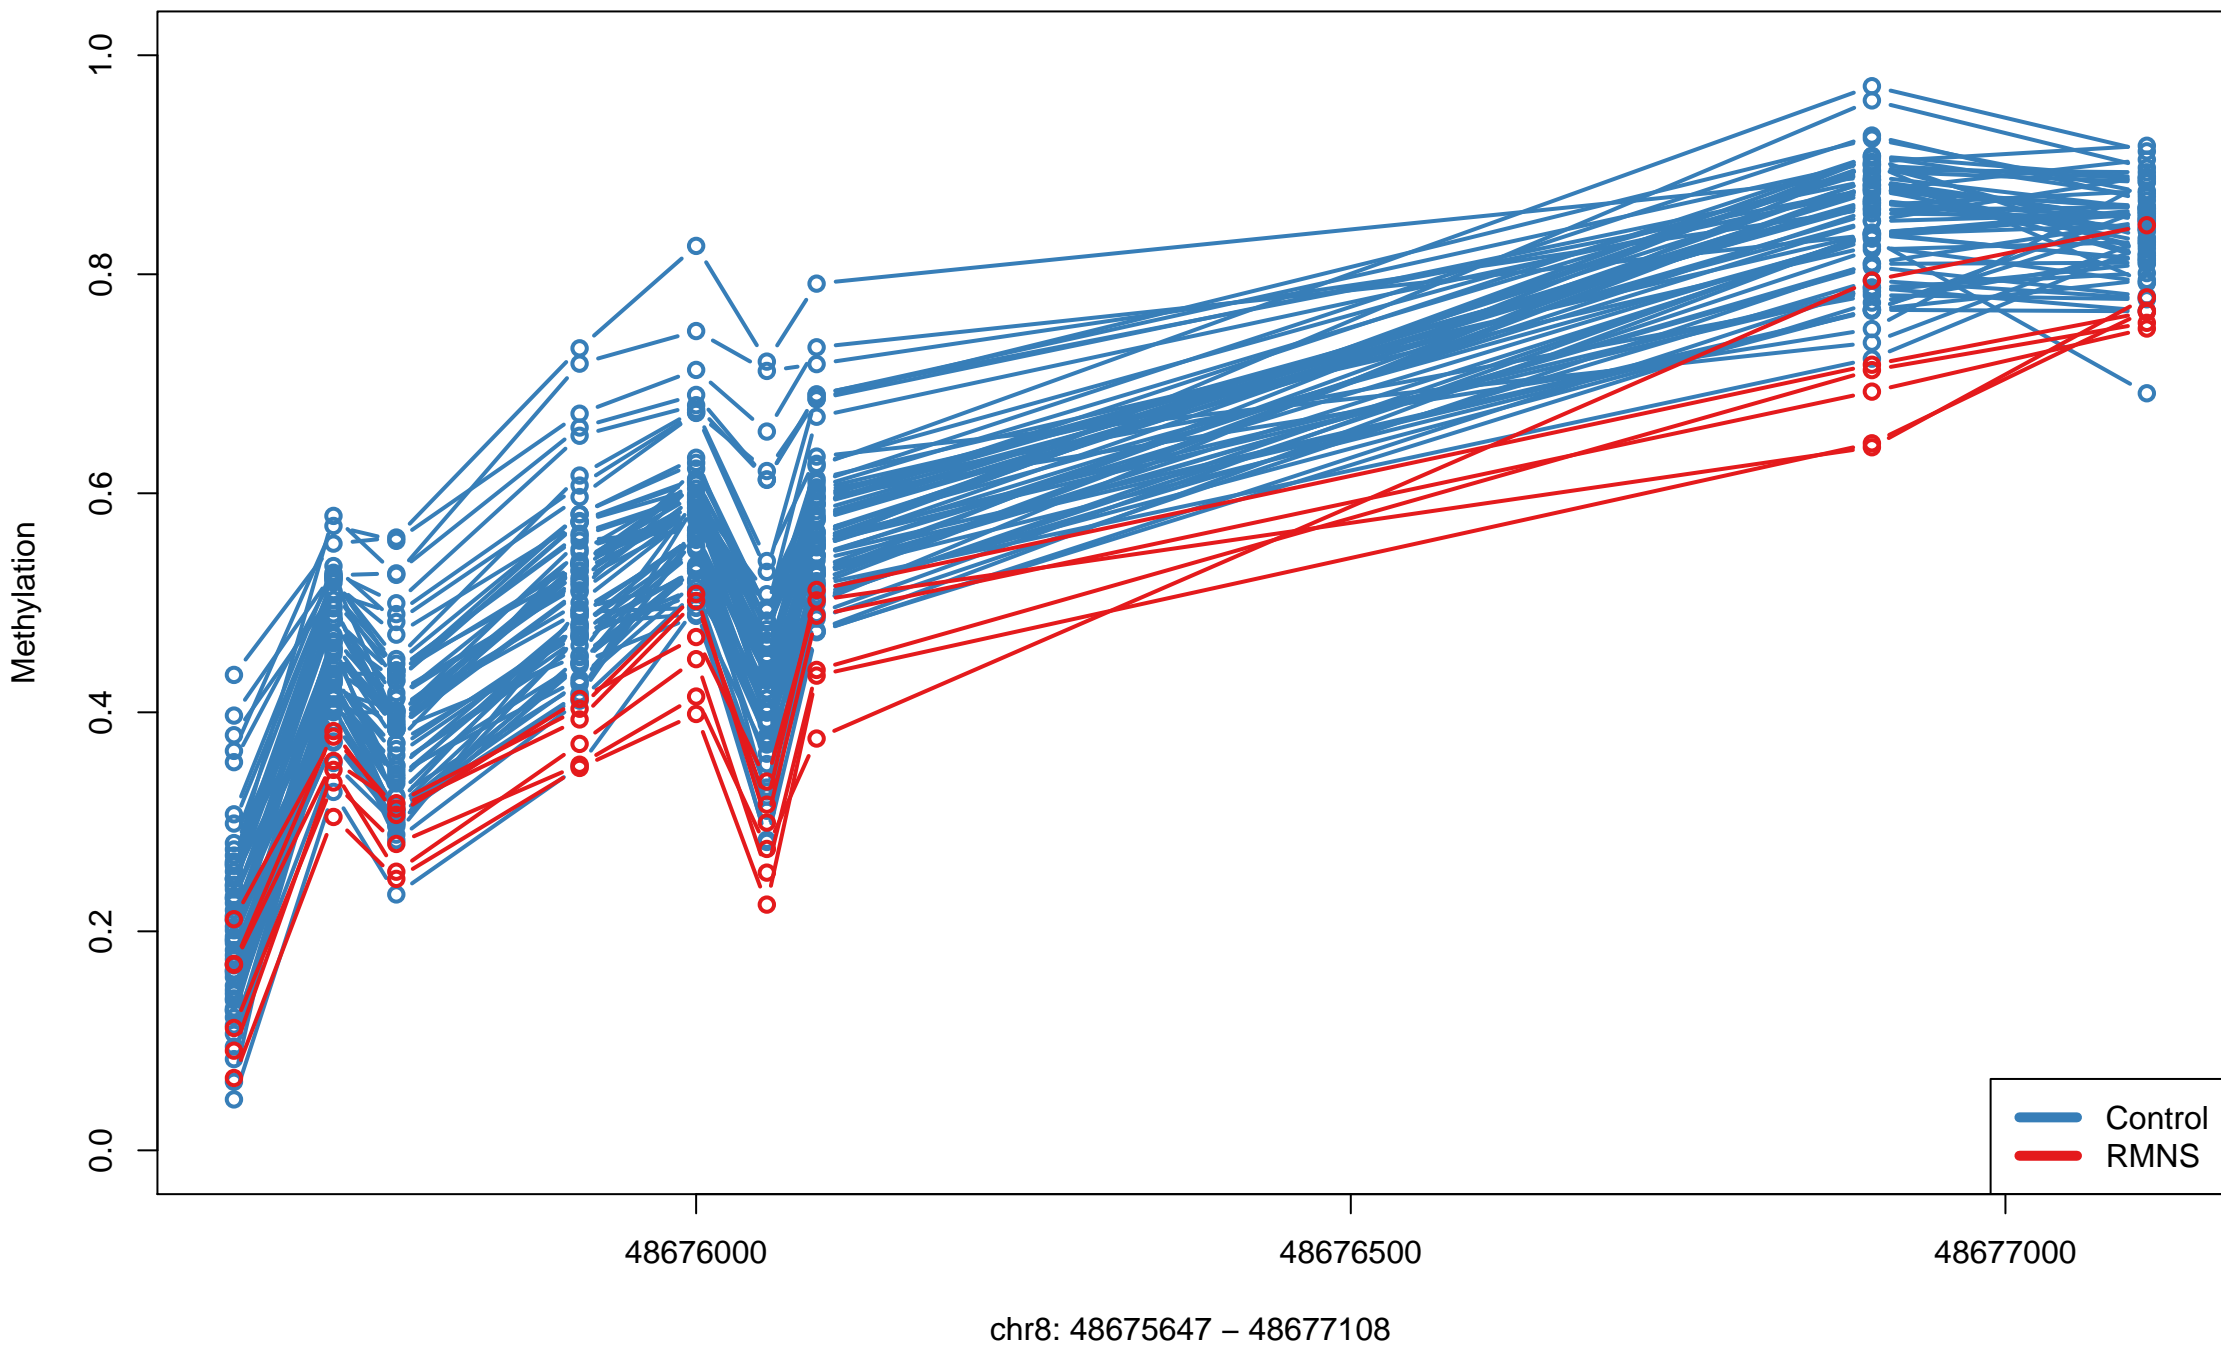

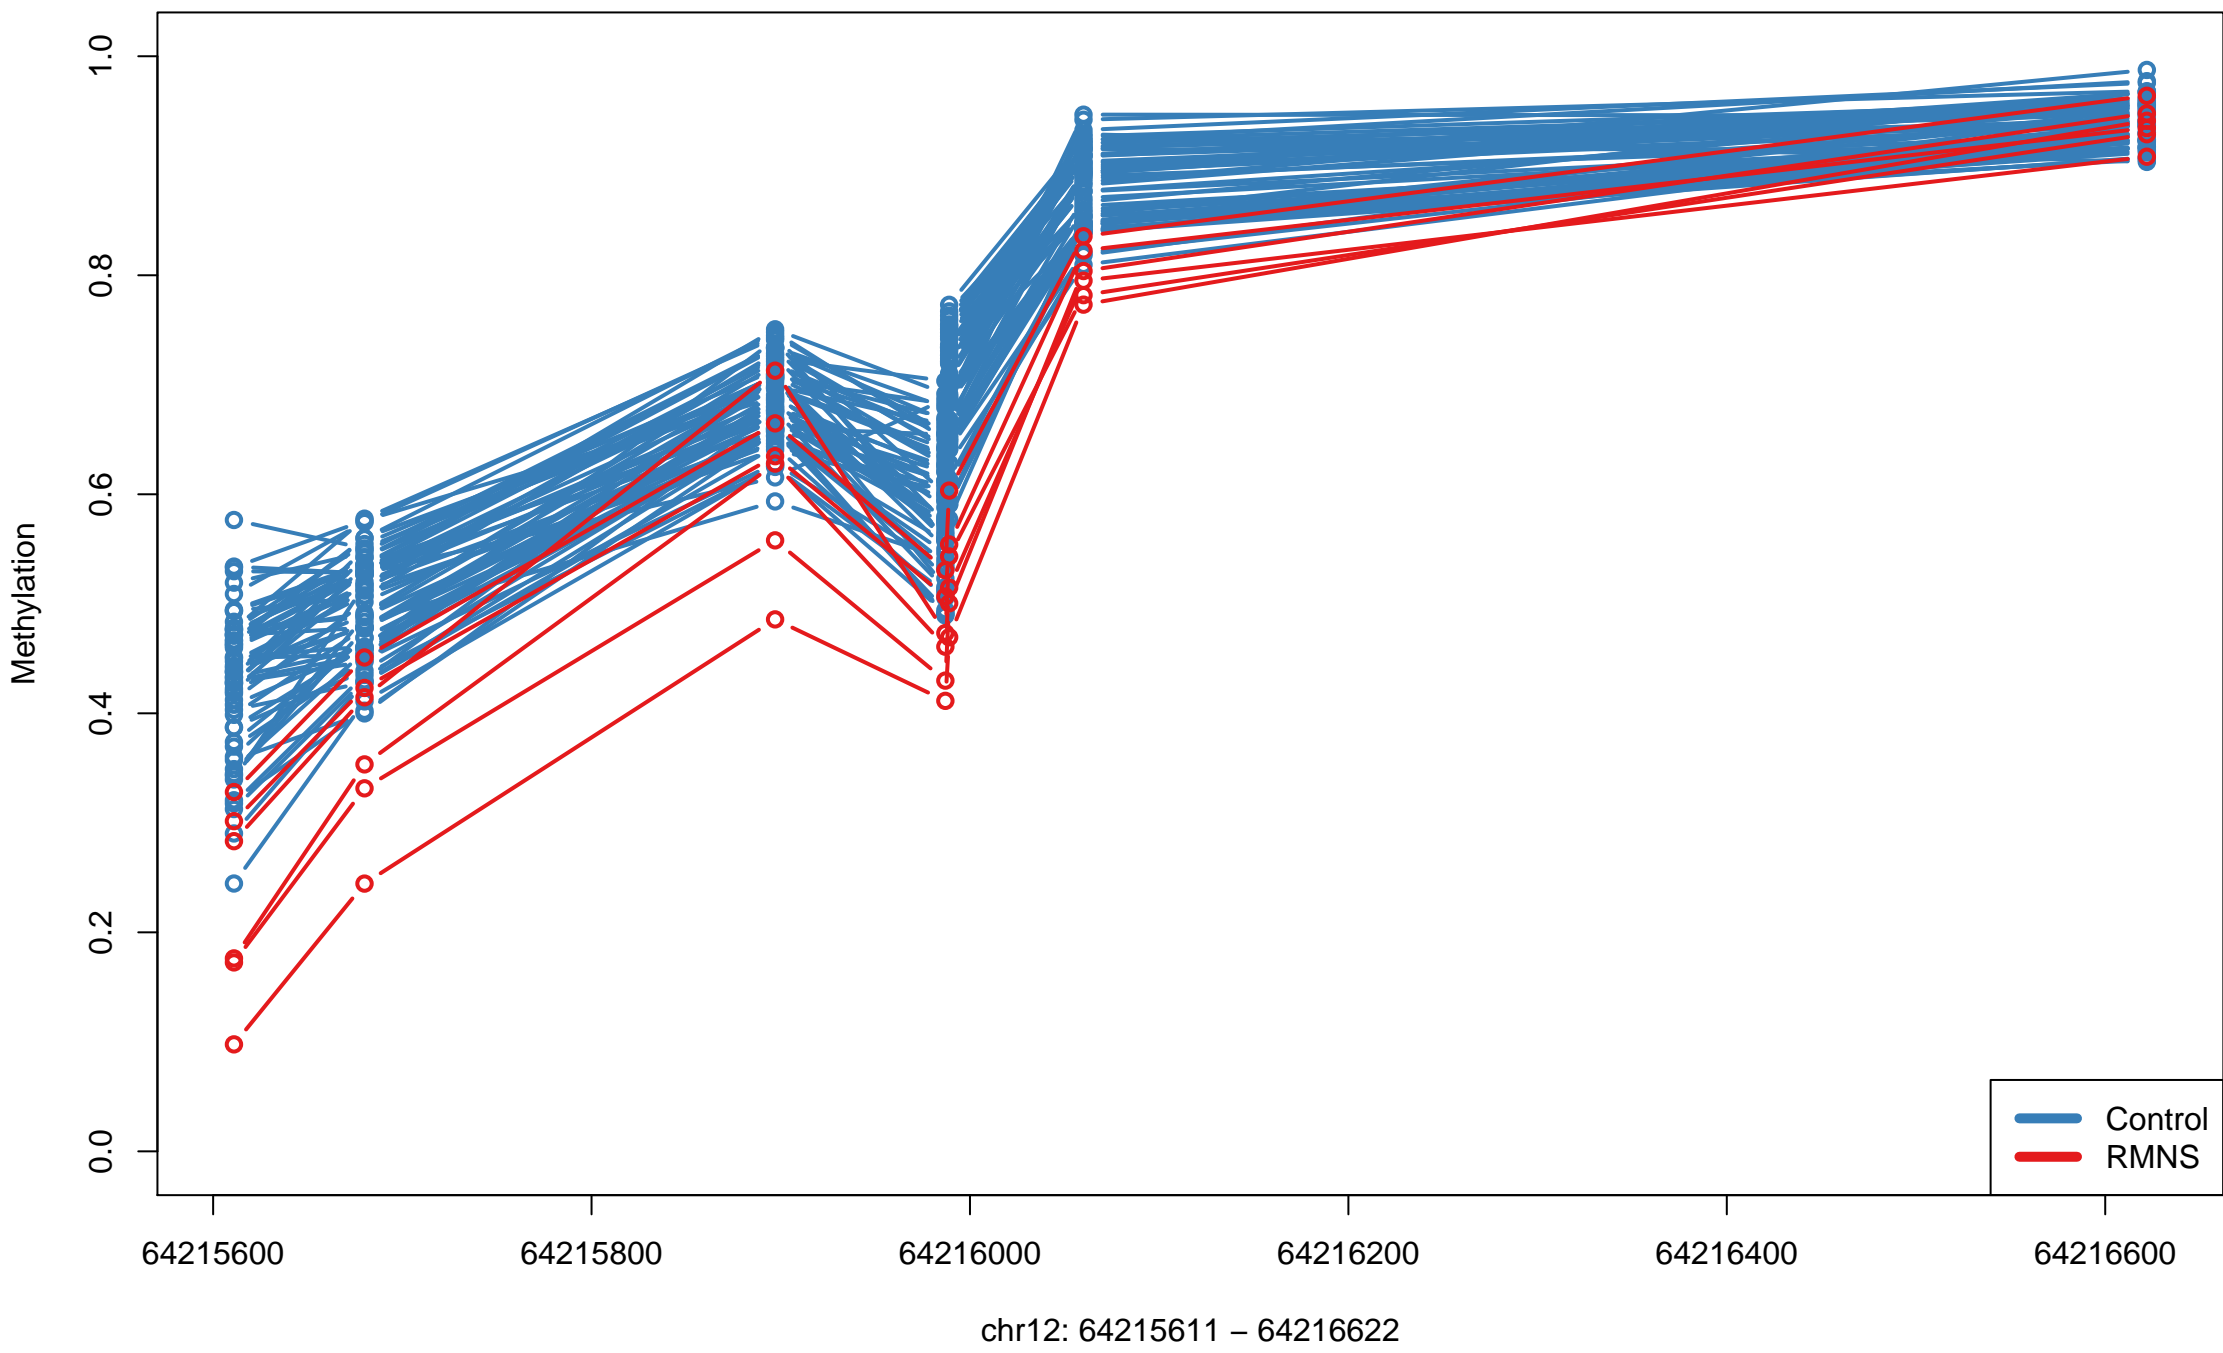

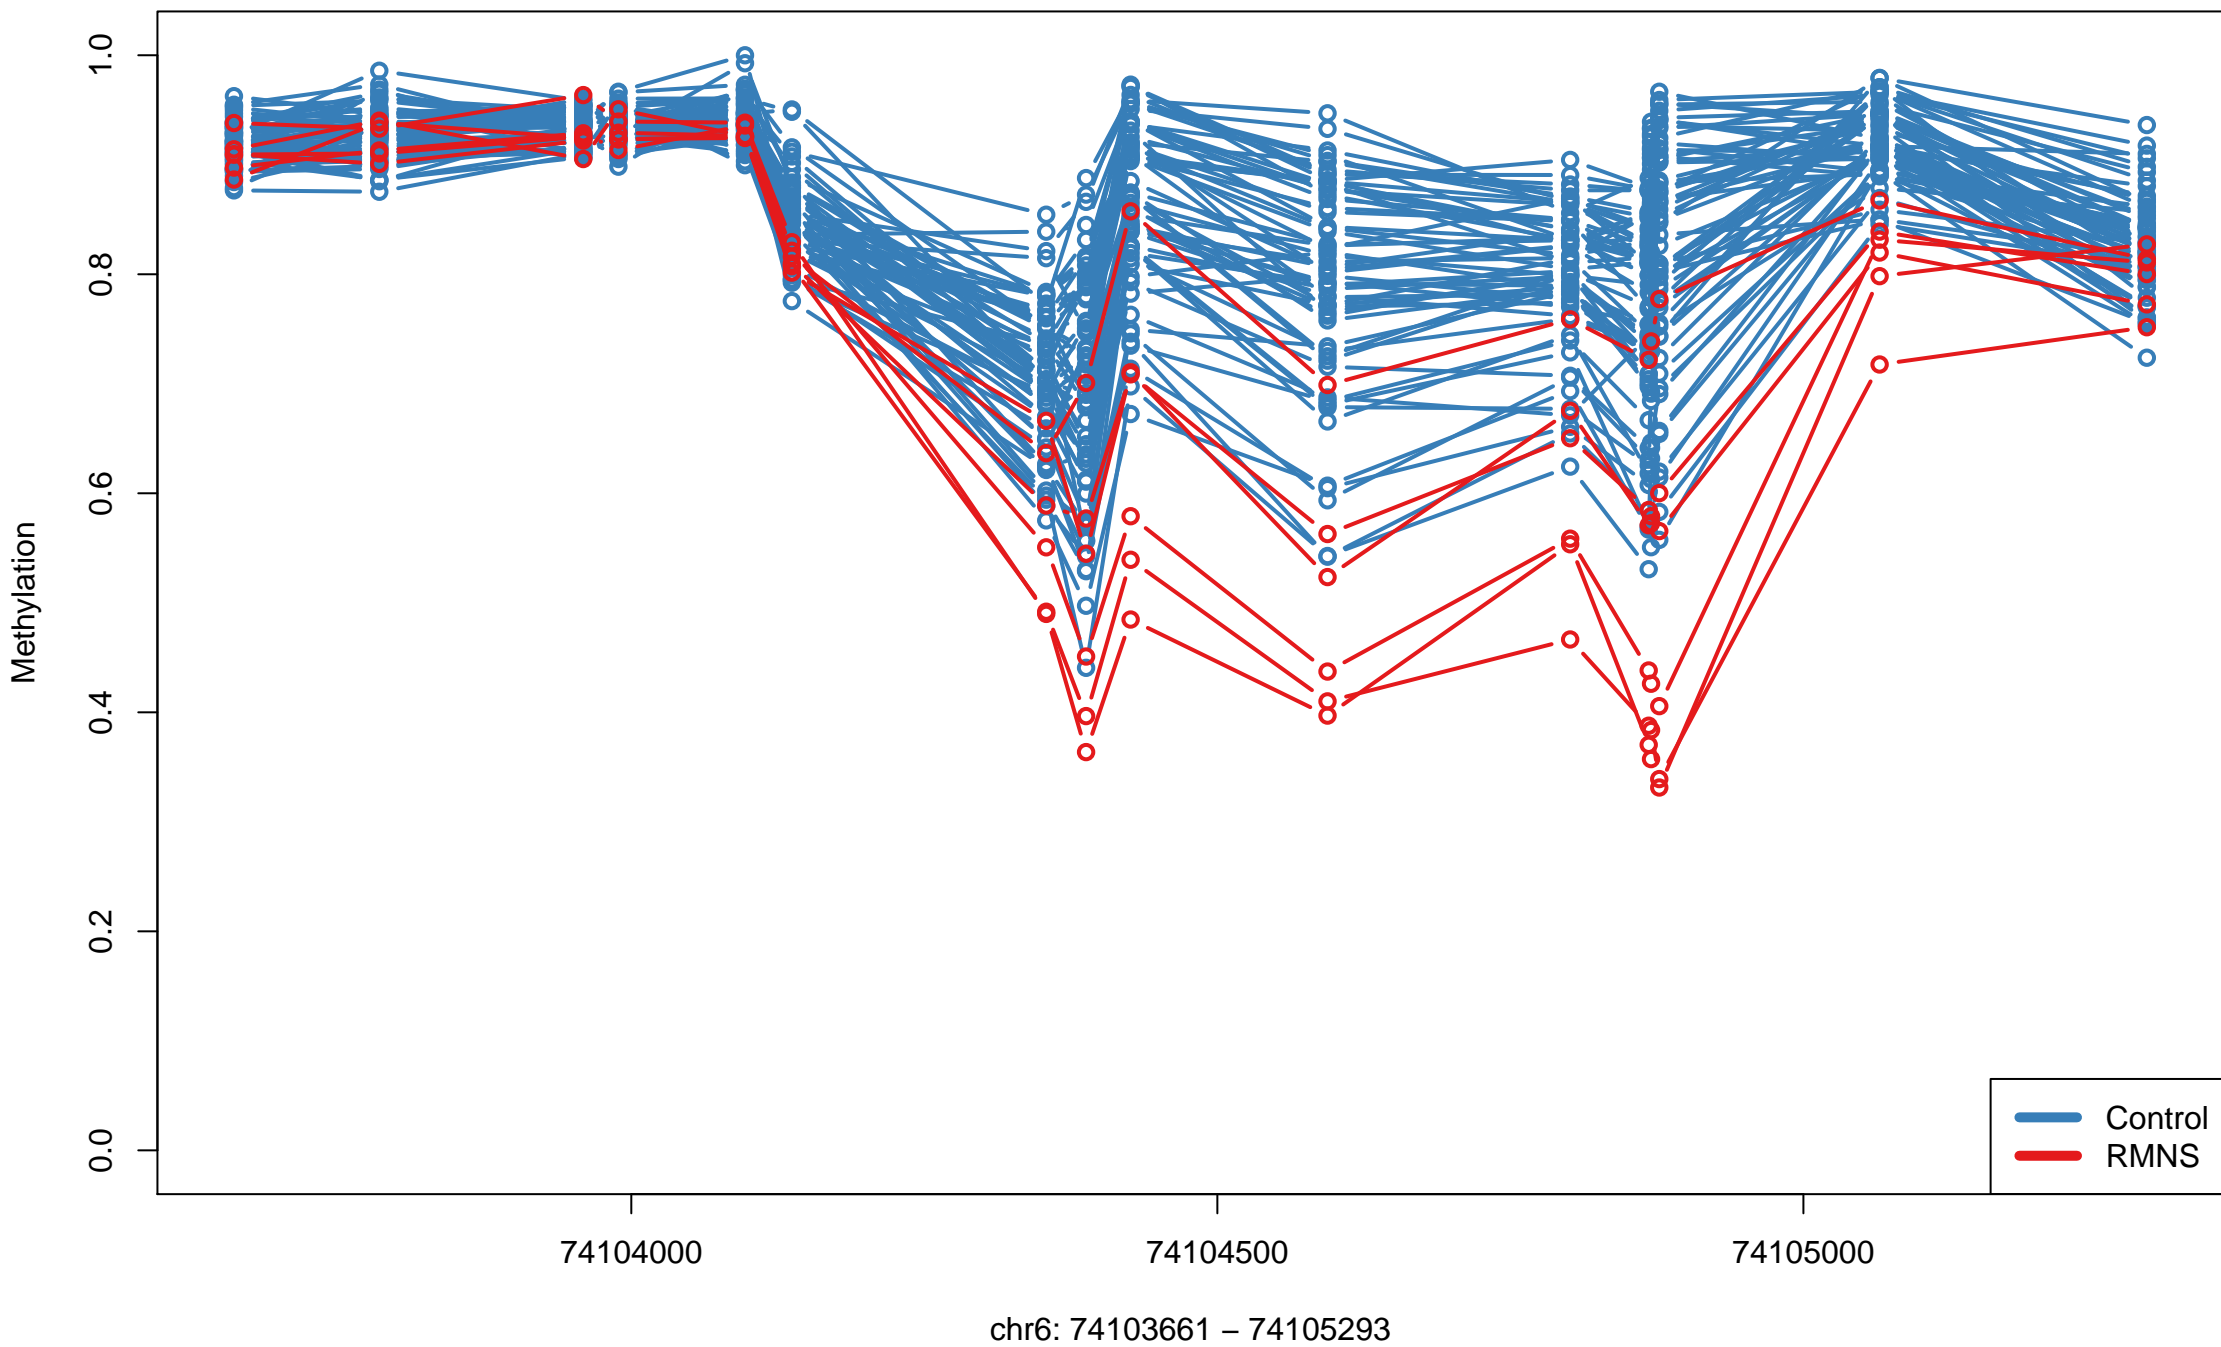

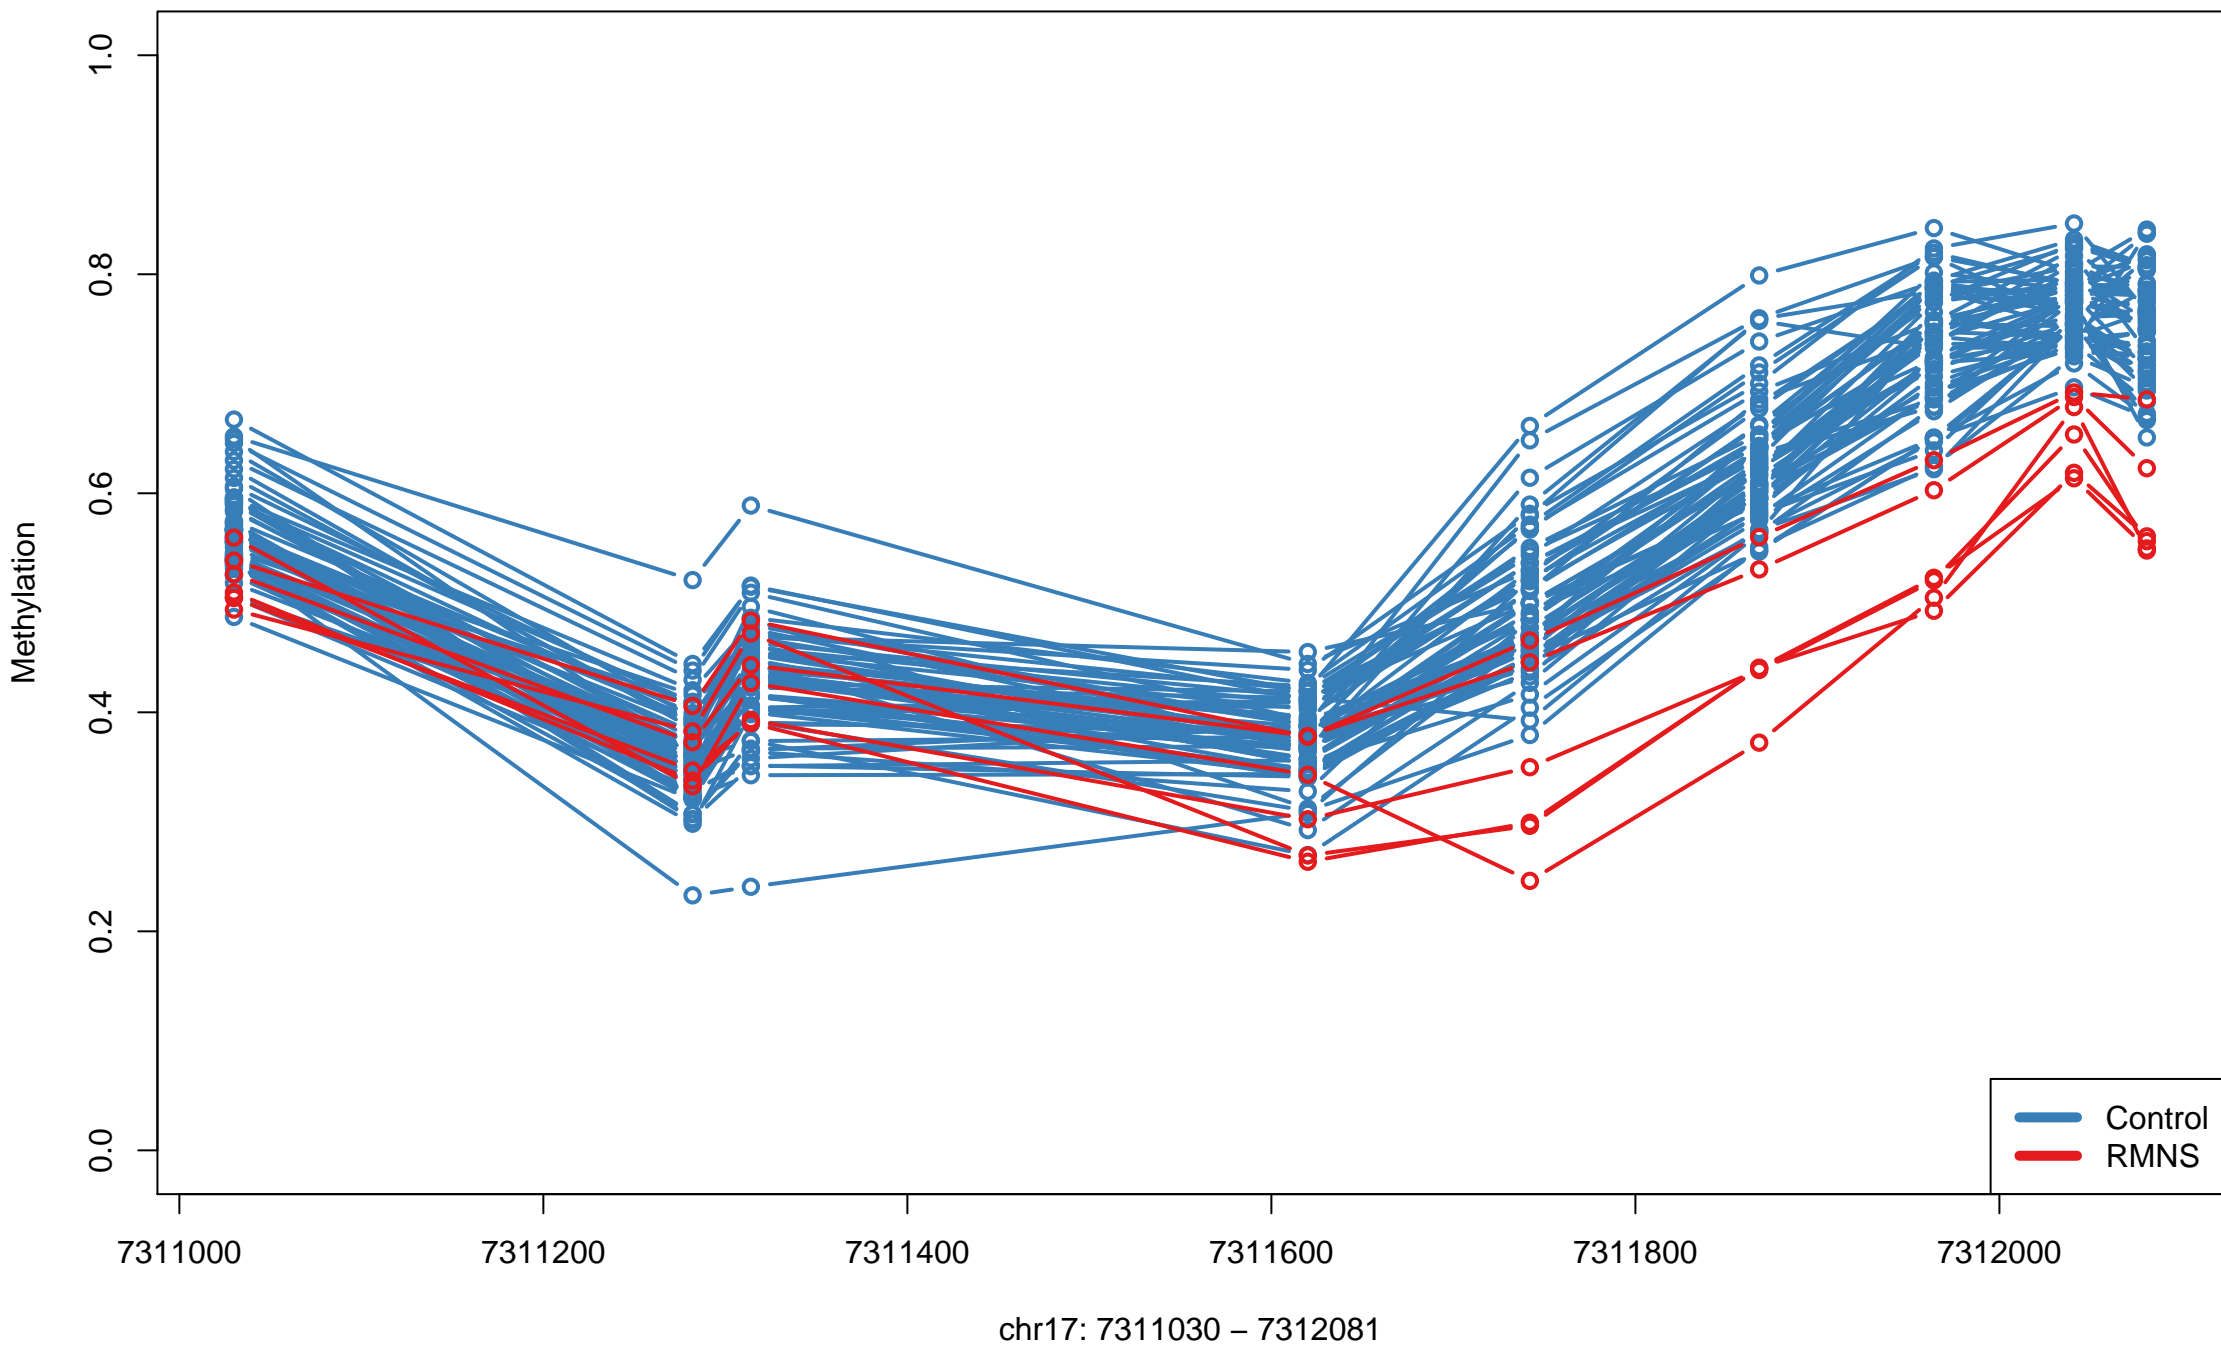

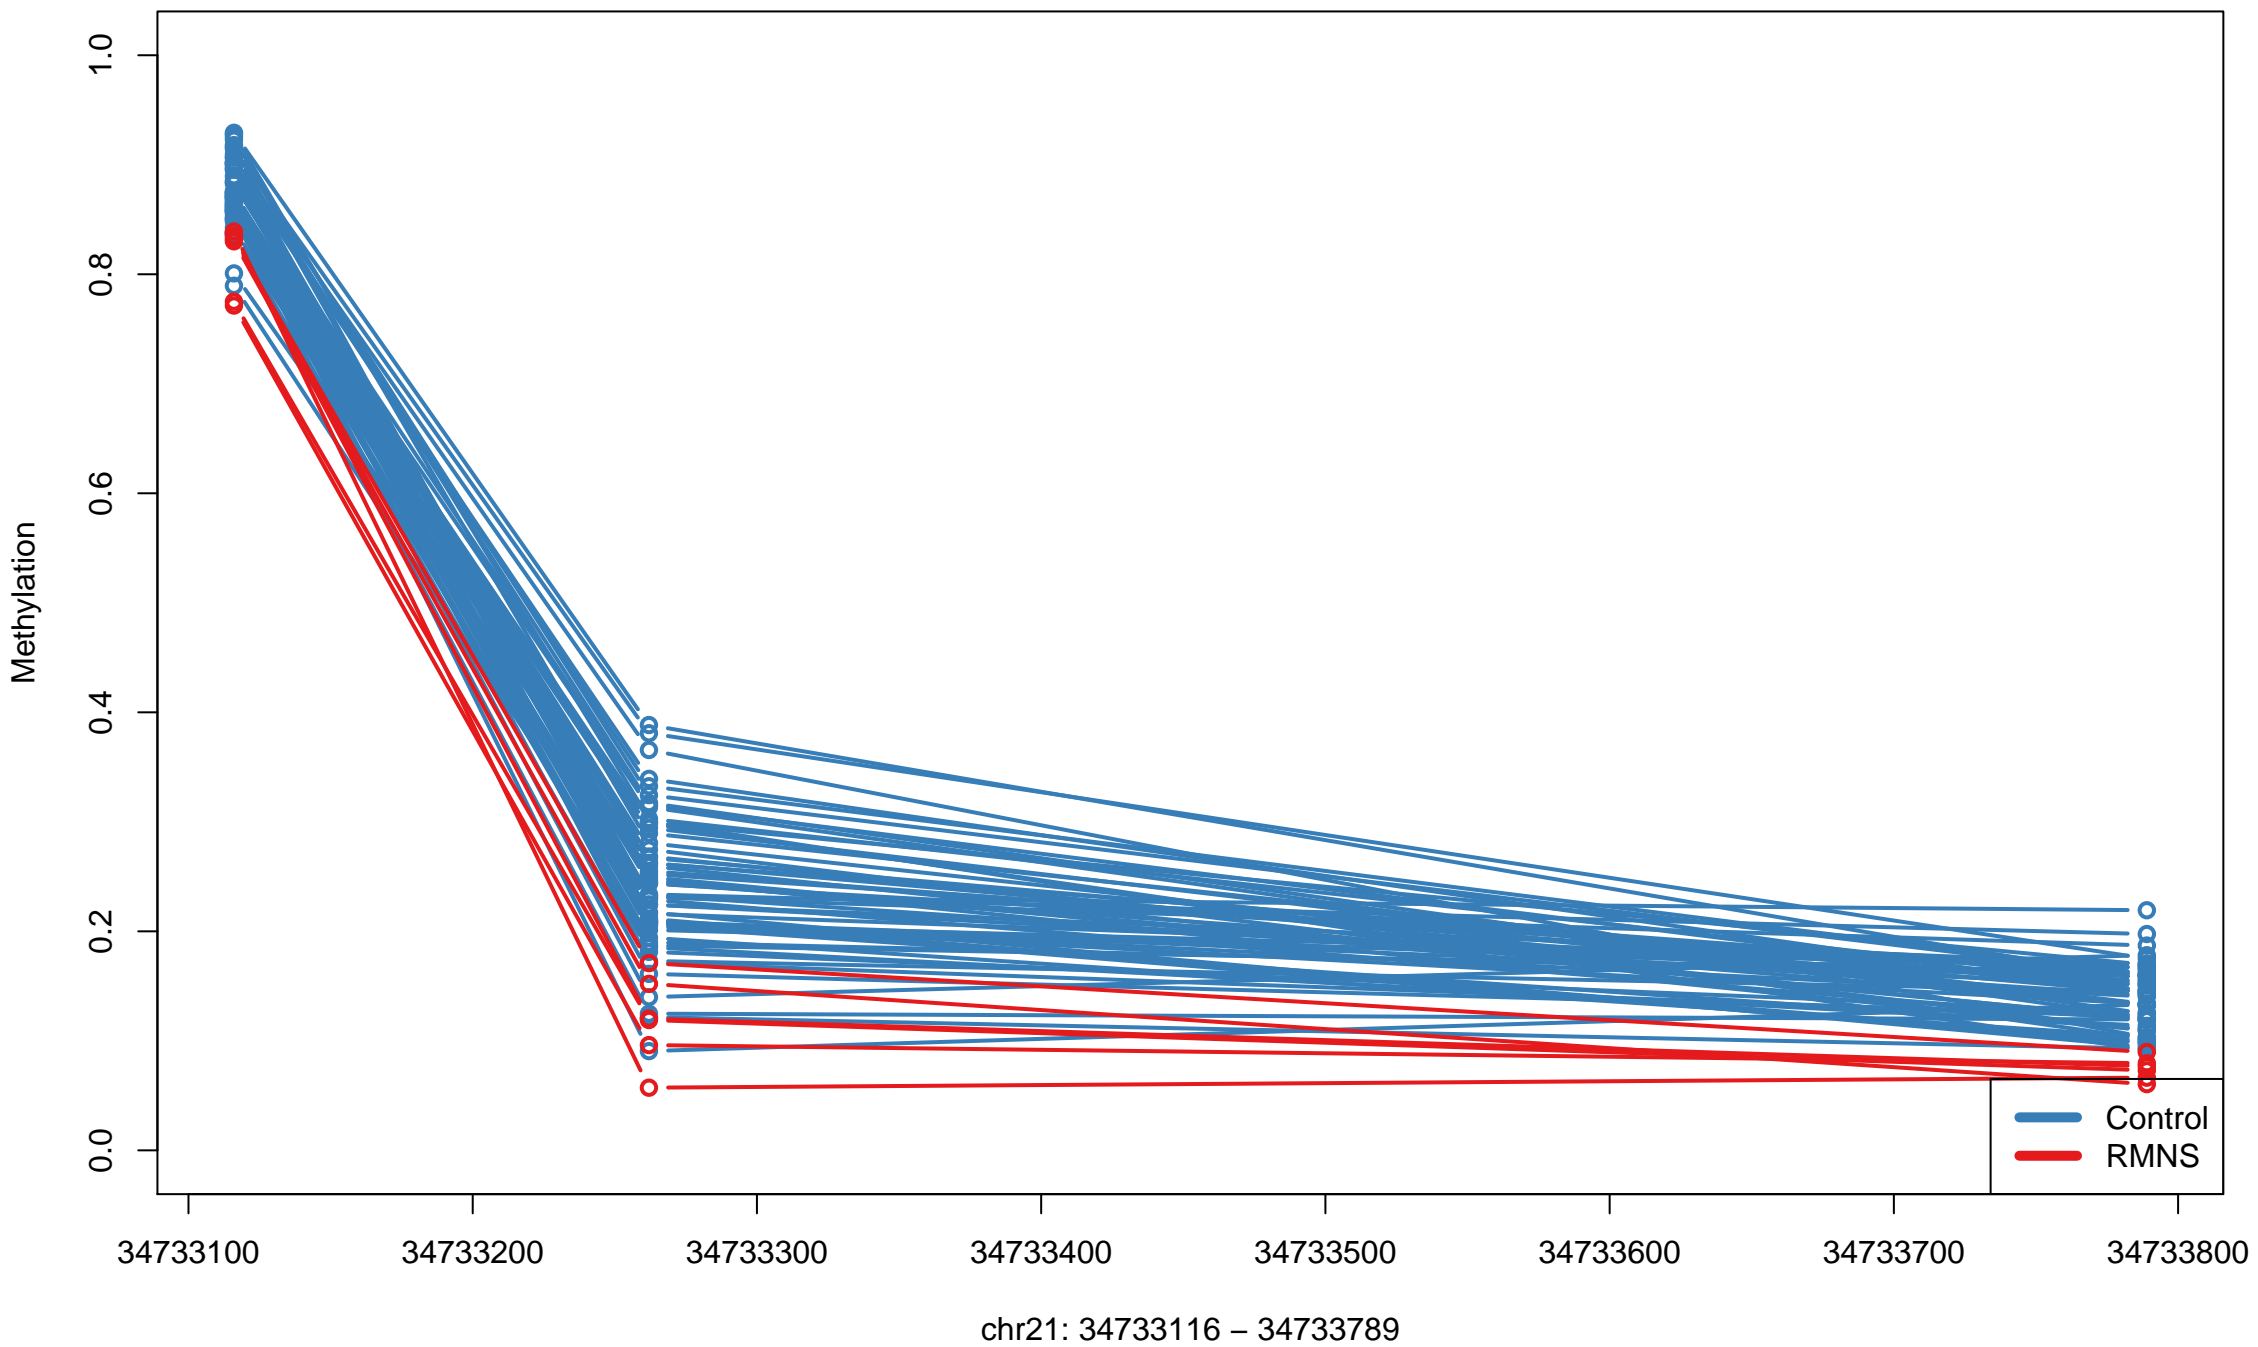

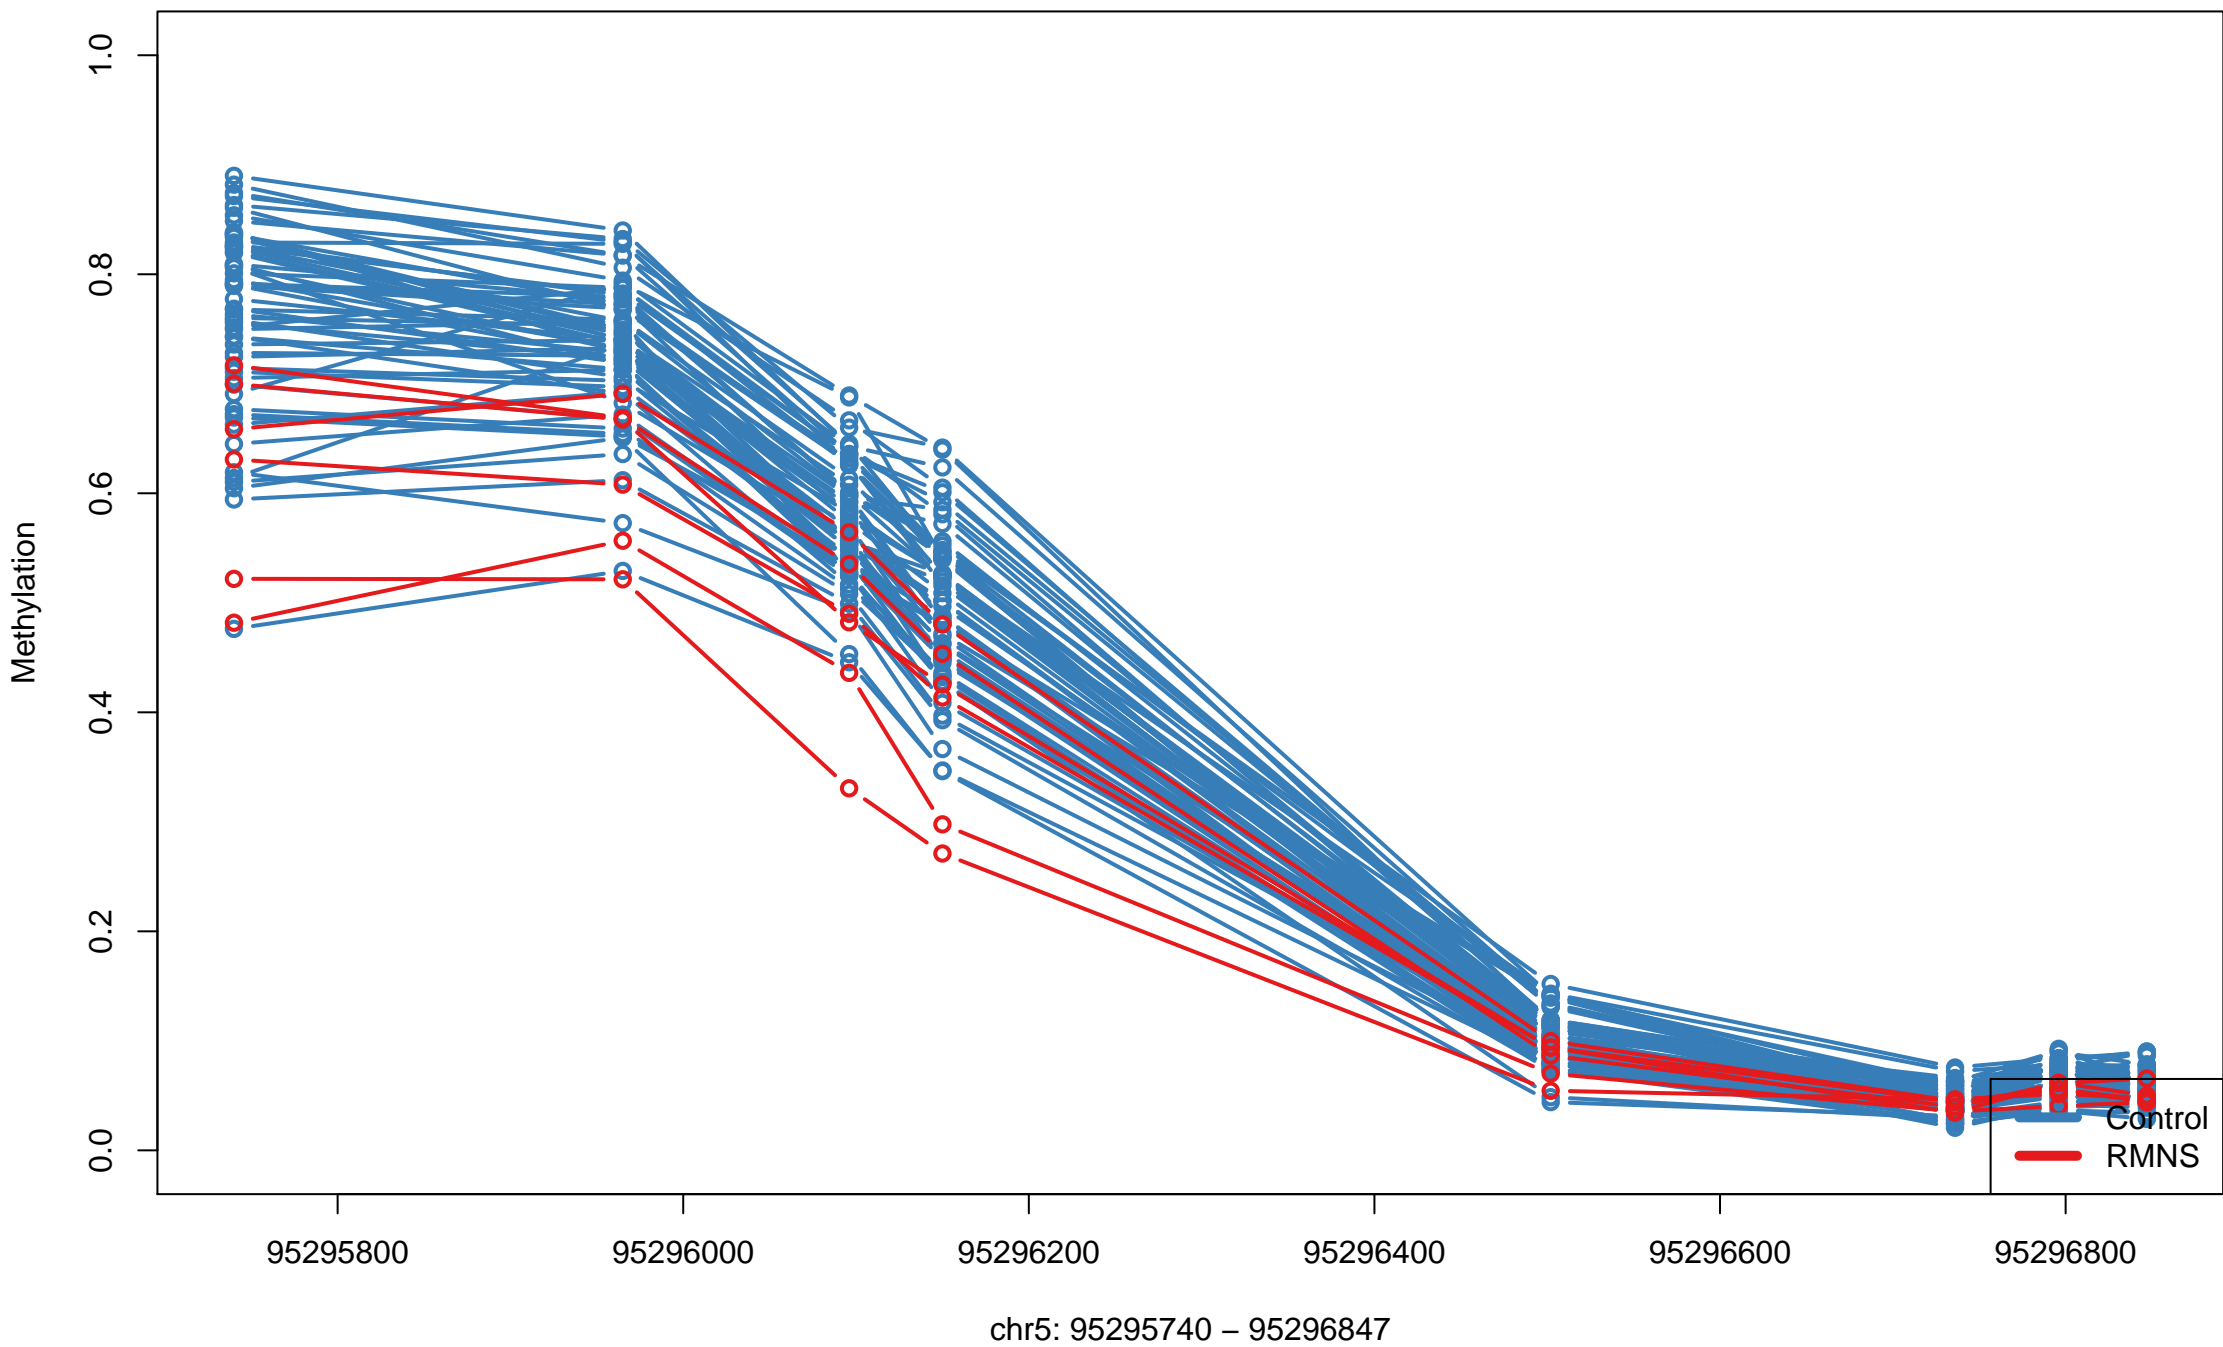

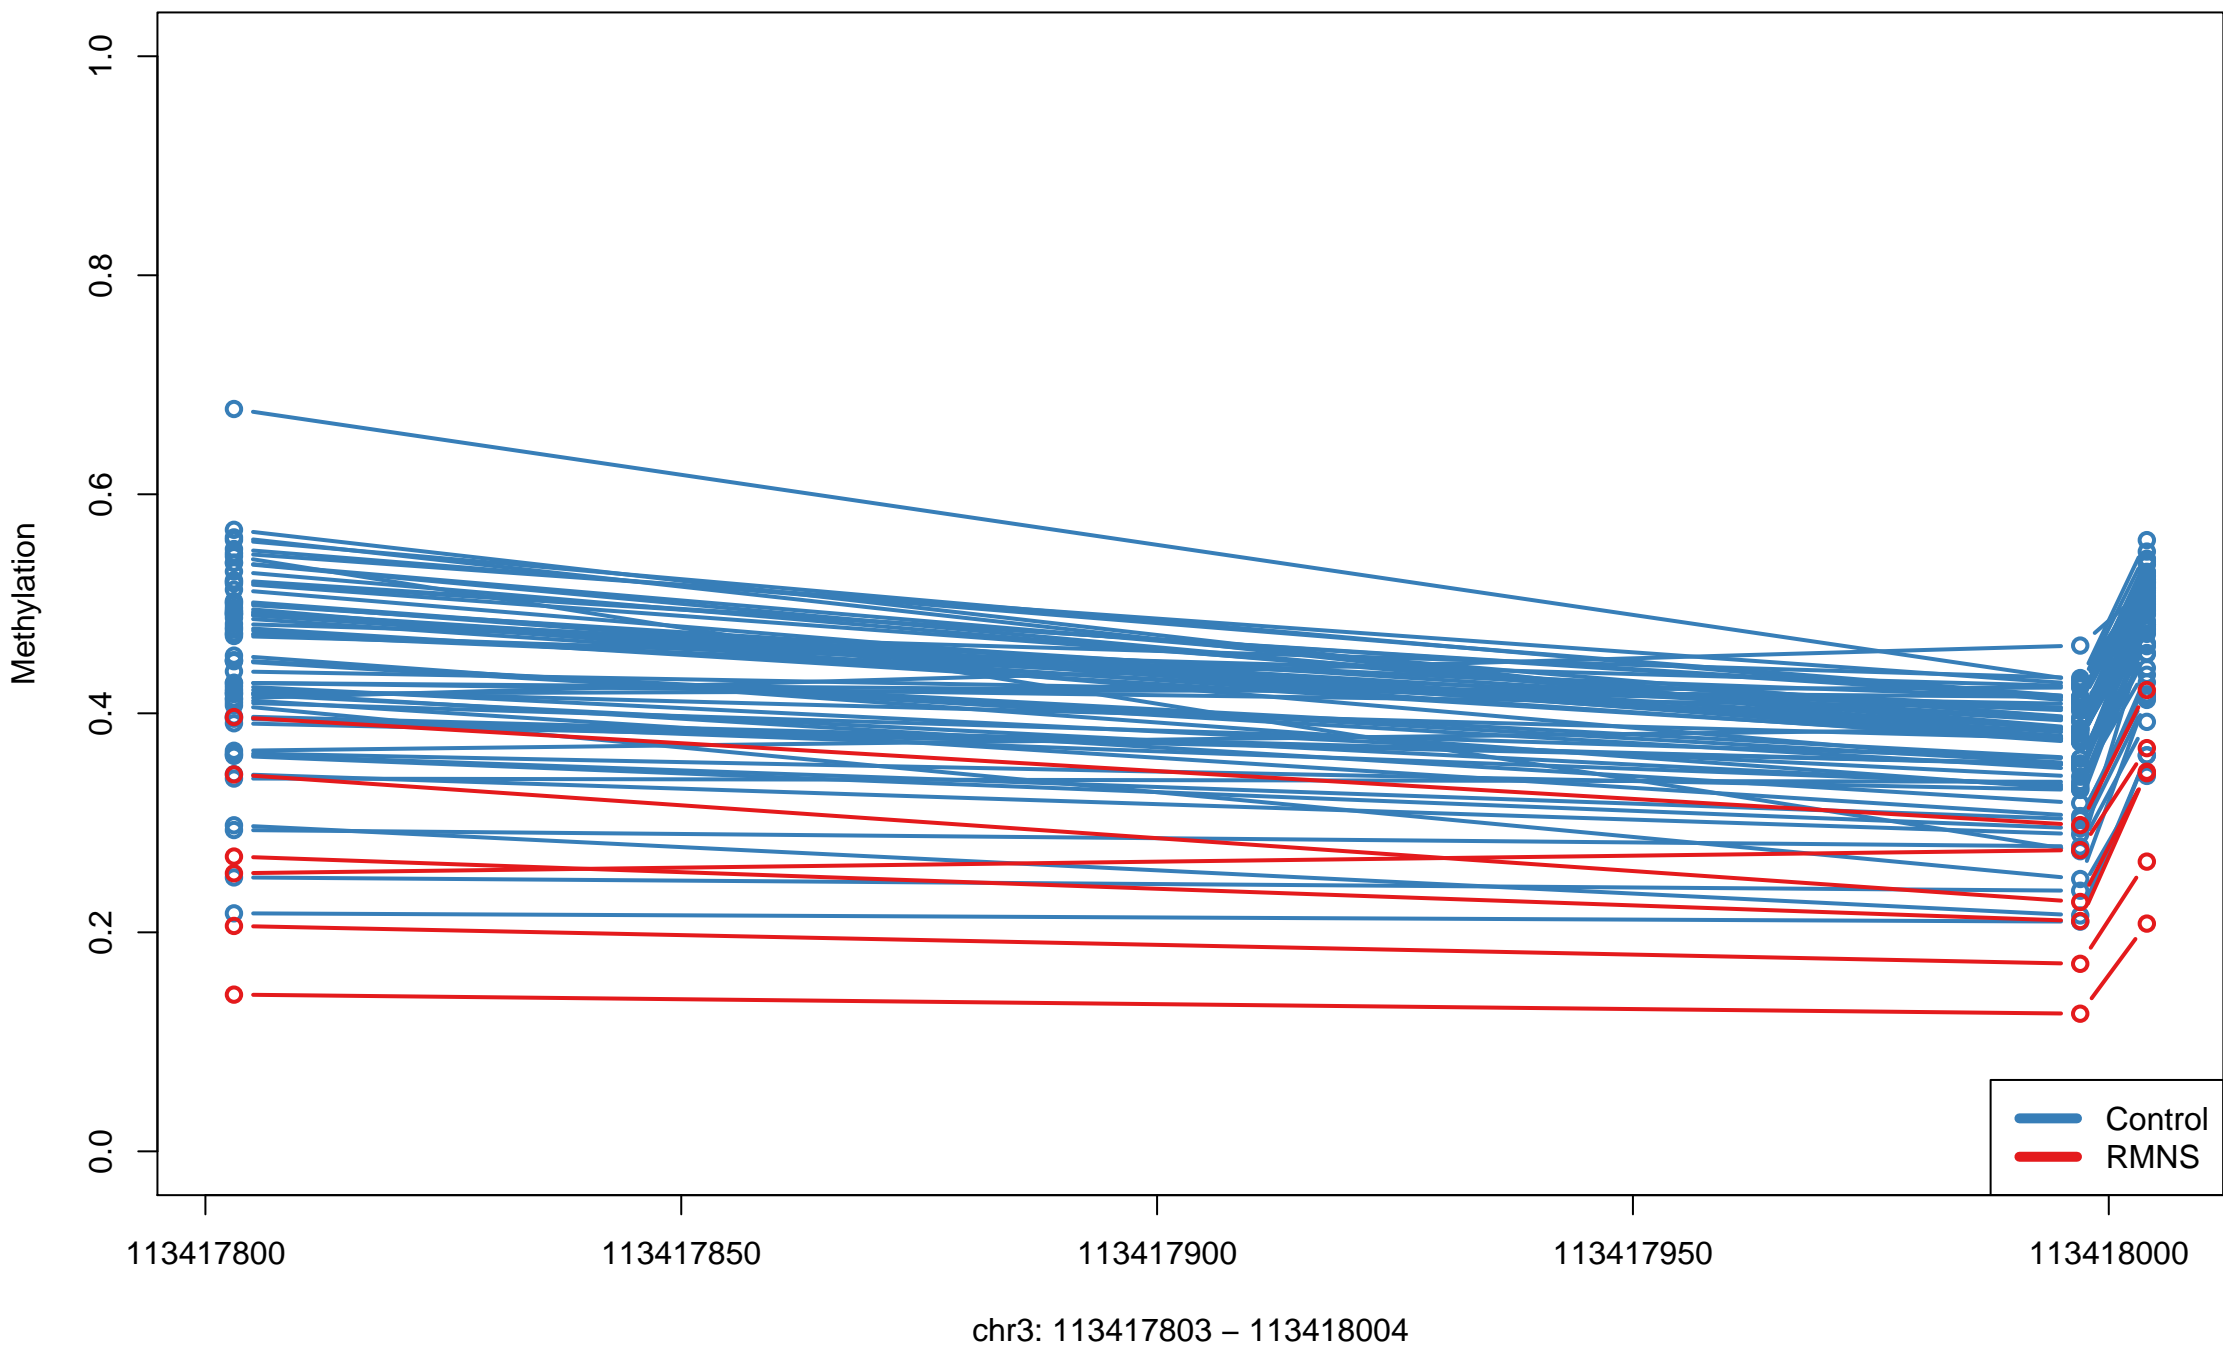

chr3: 113417803 – 113418004



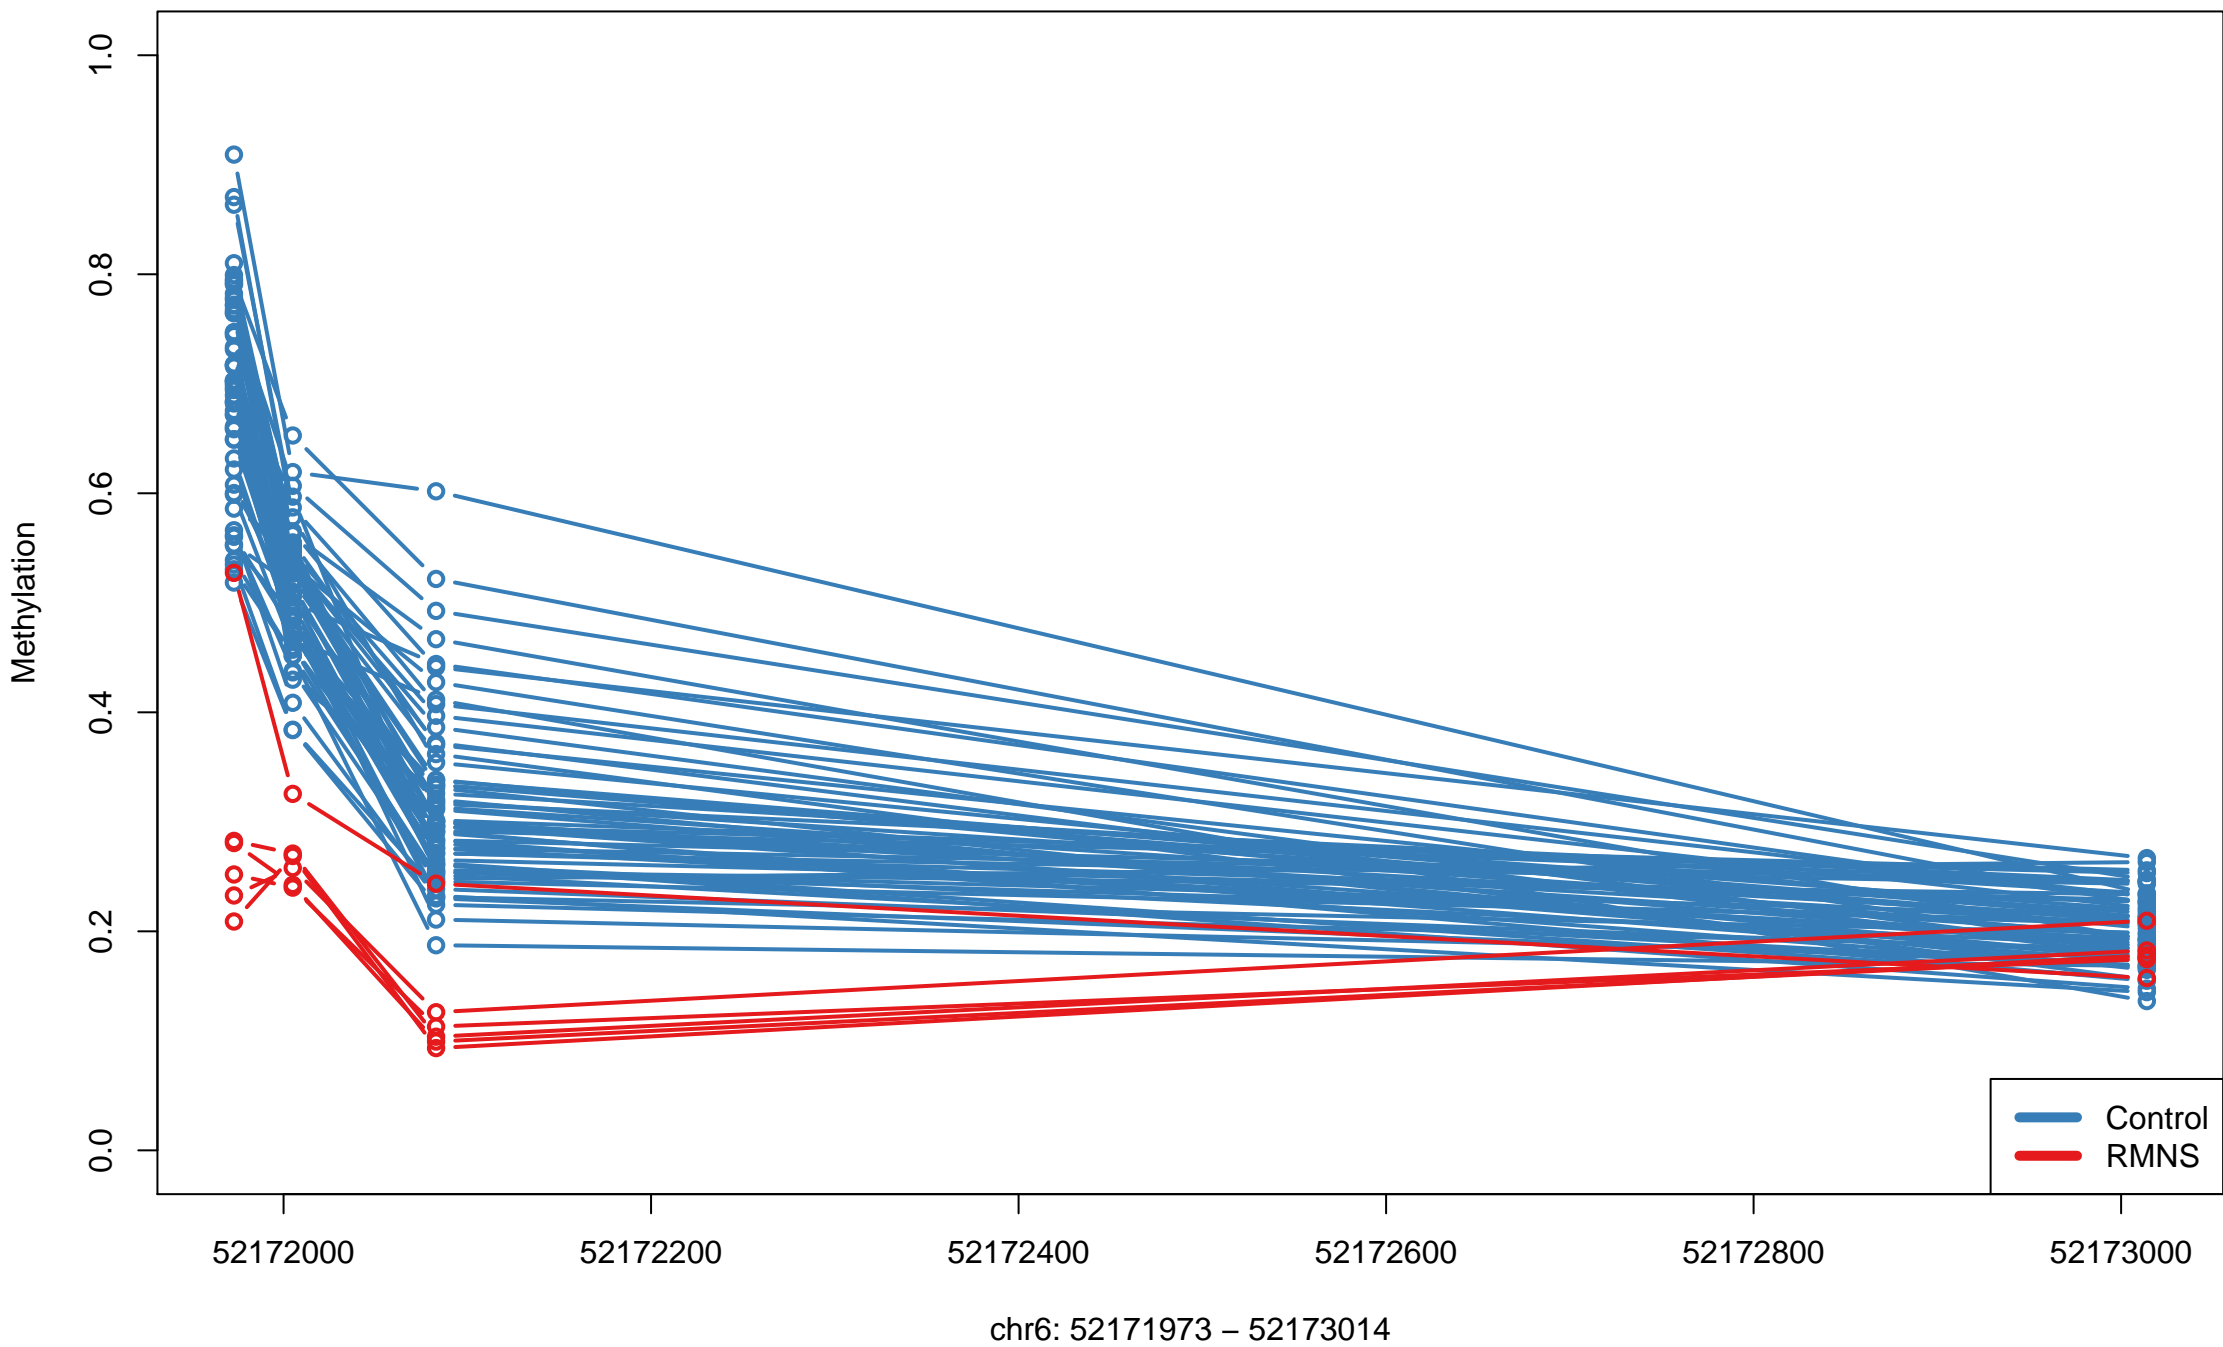

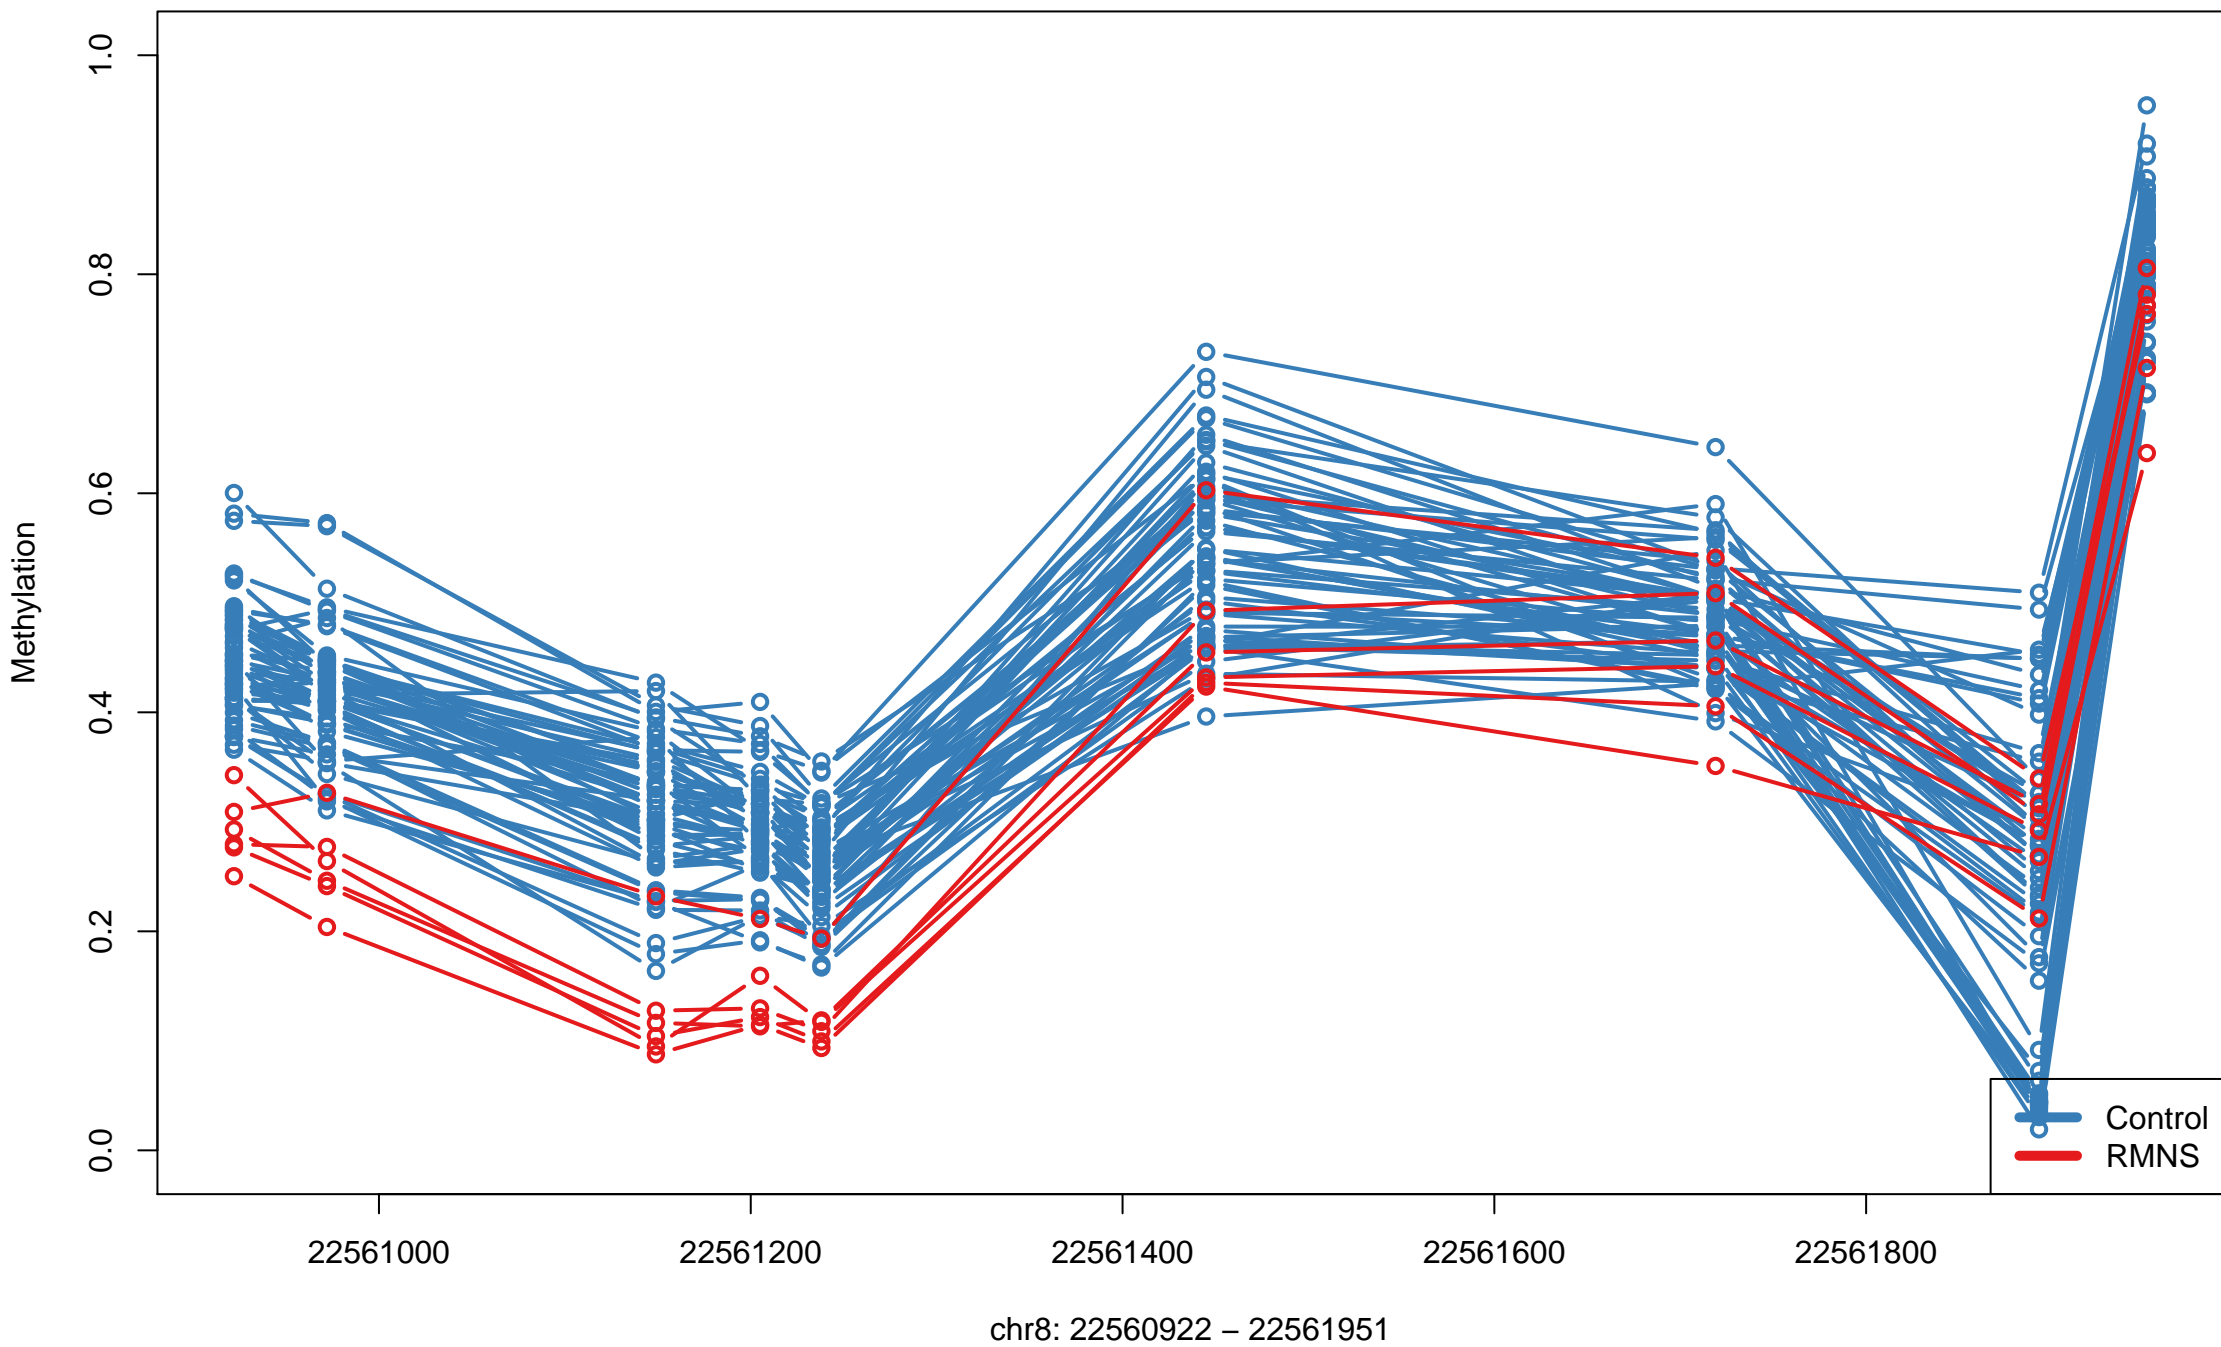

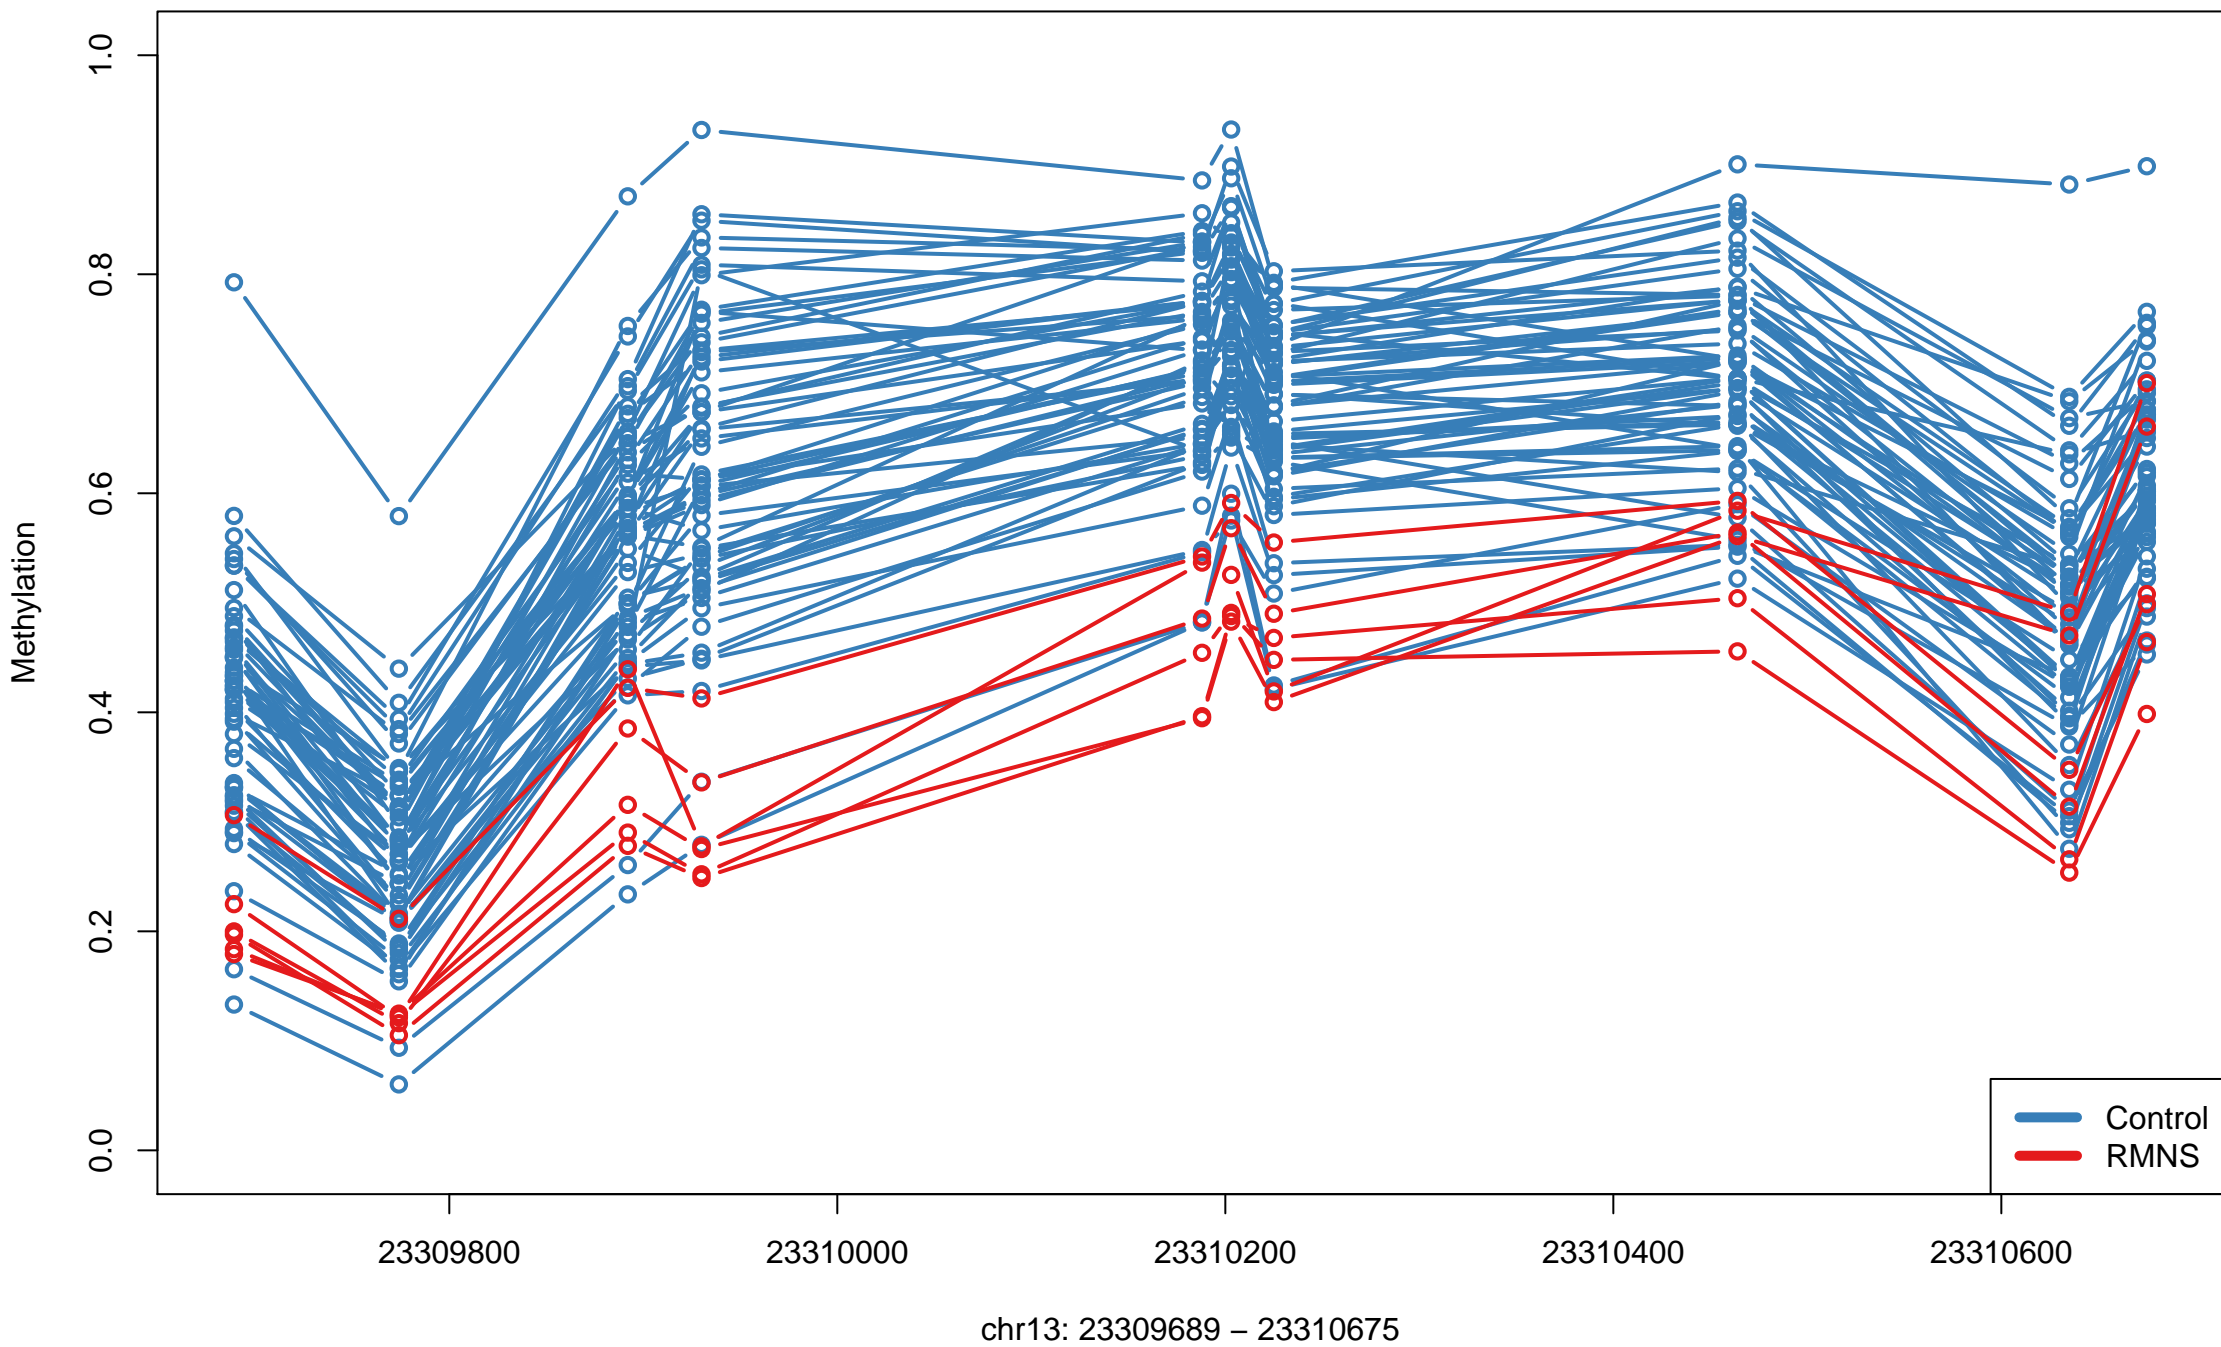

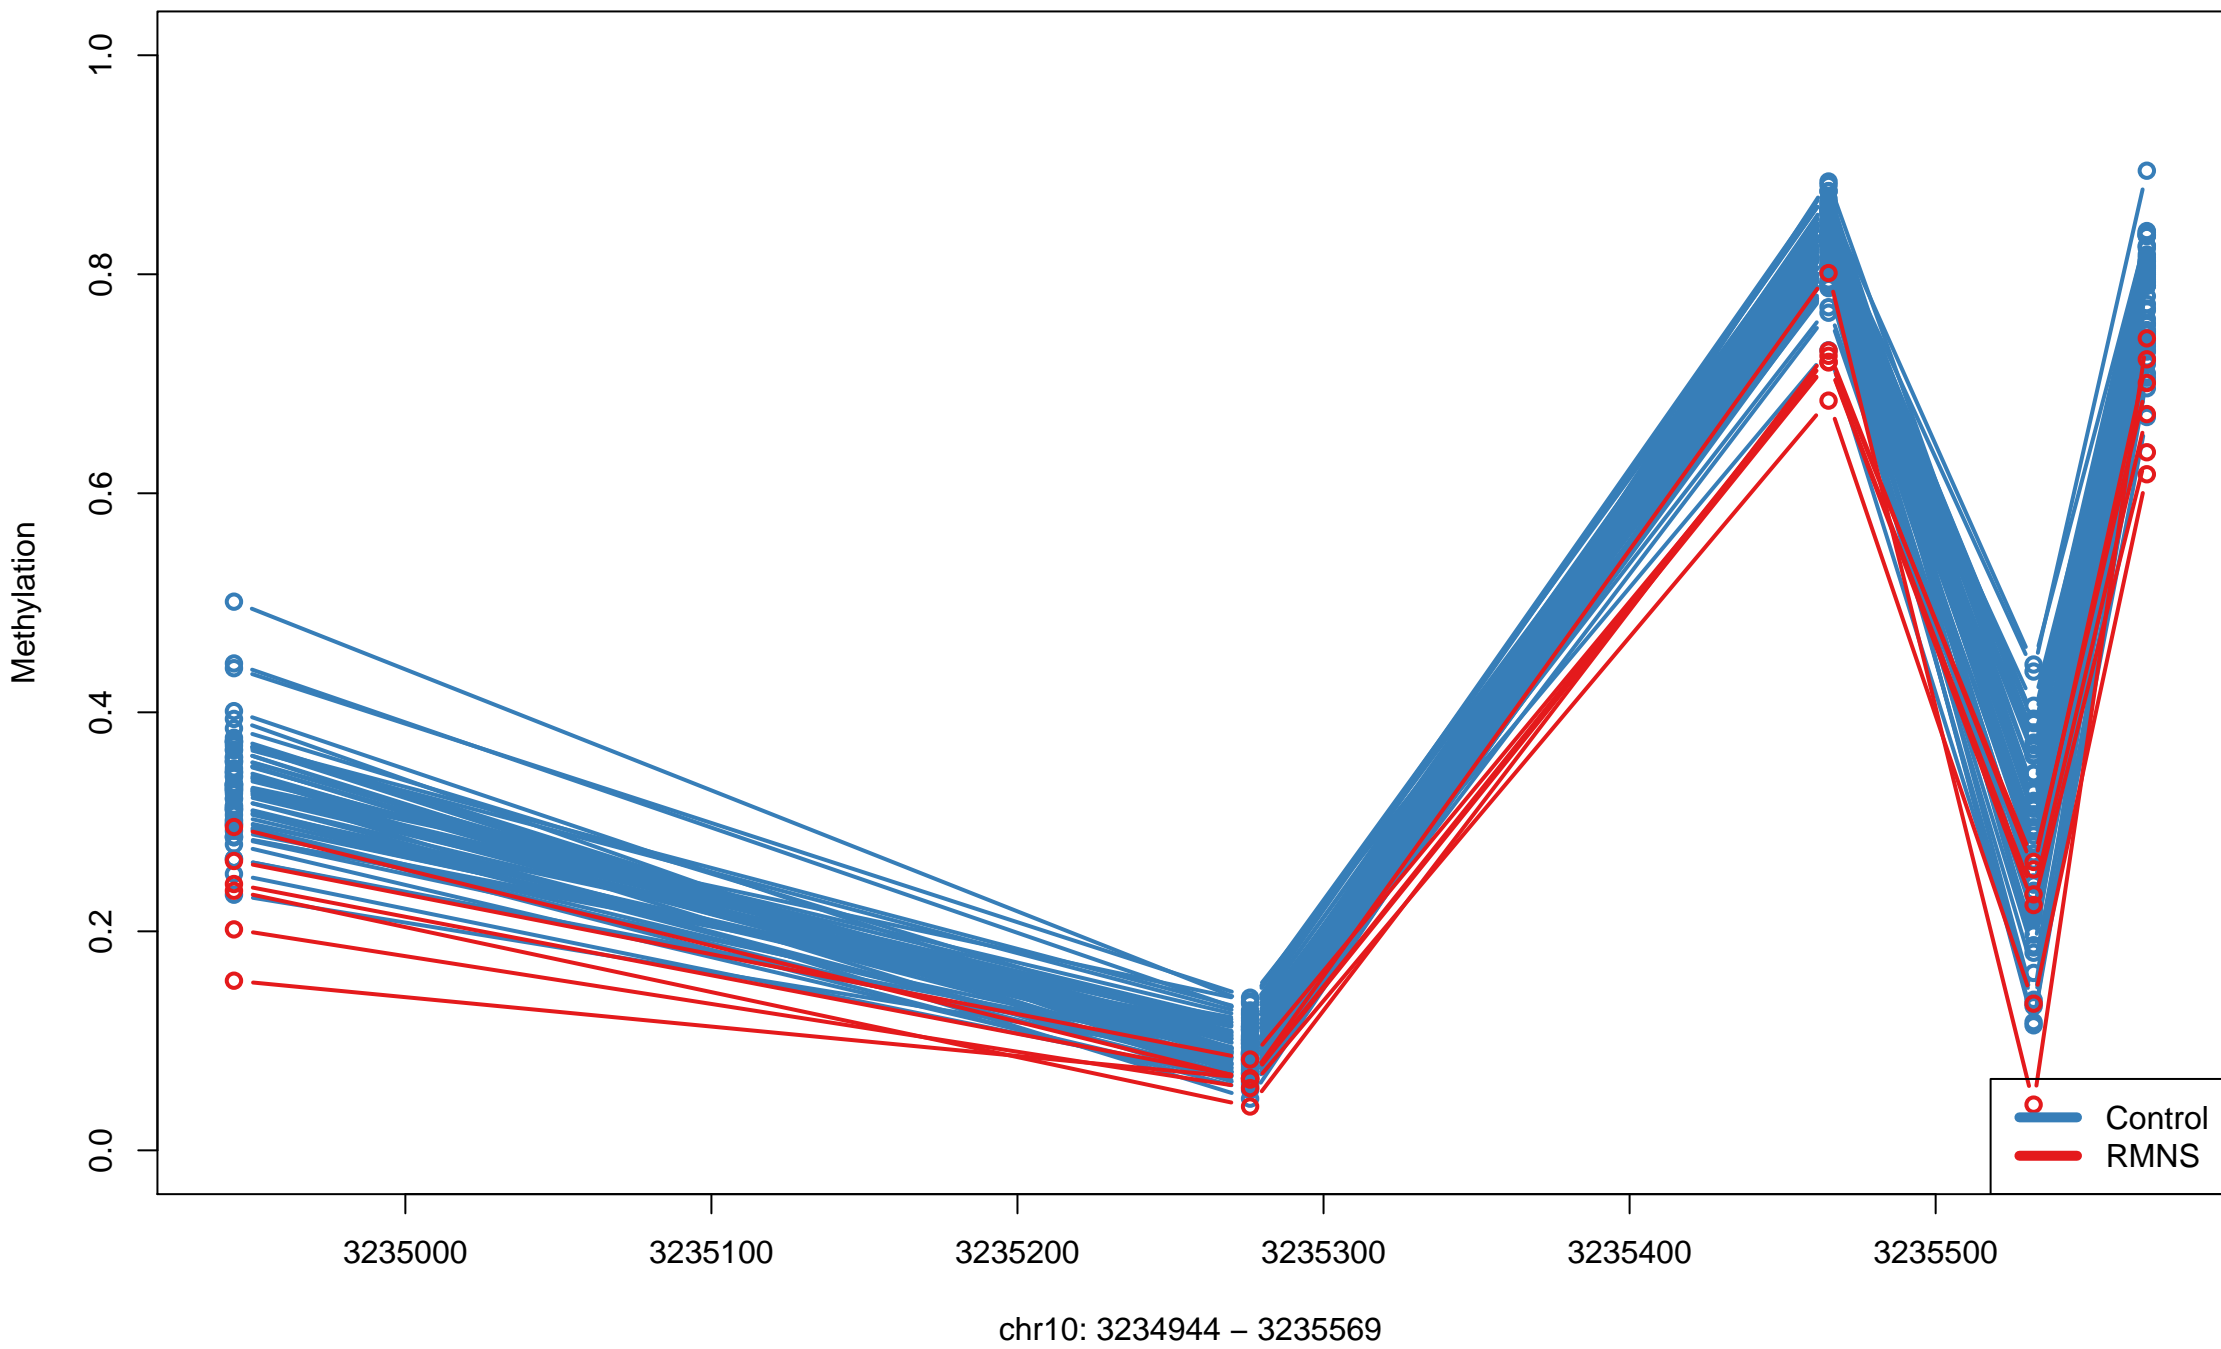

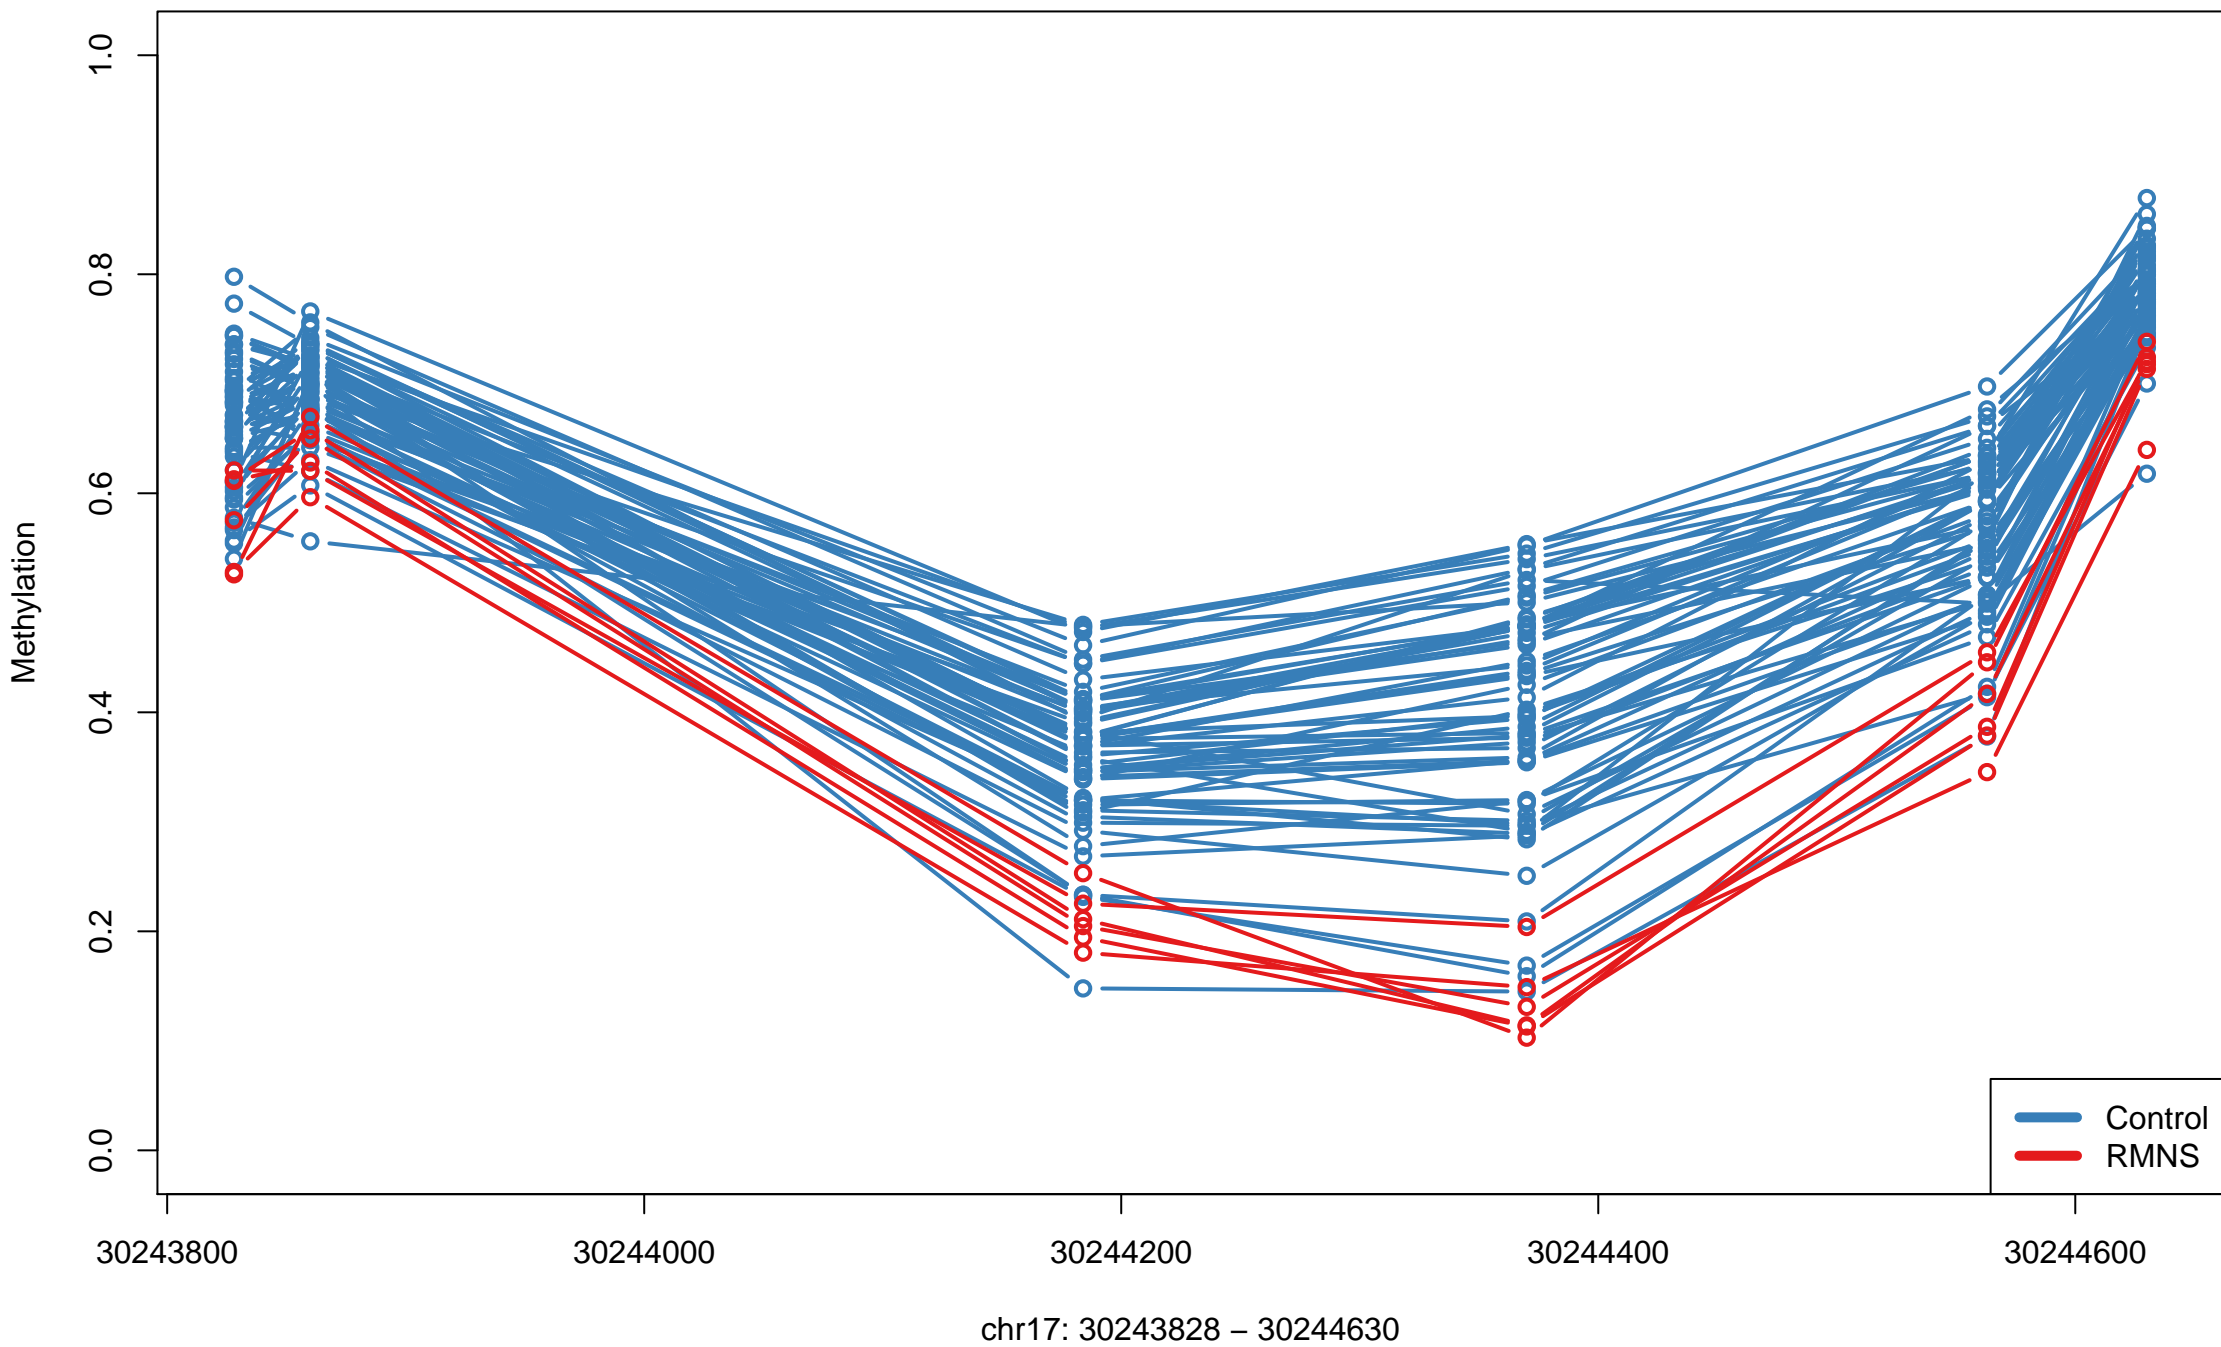

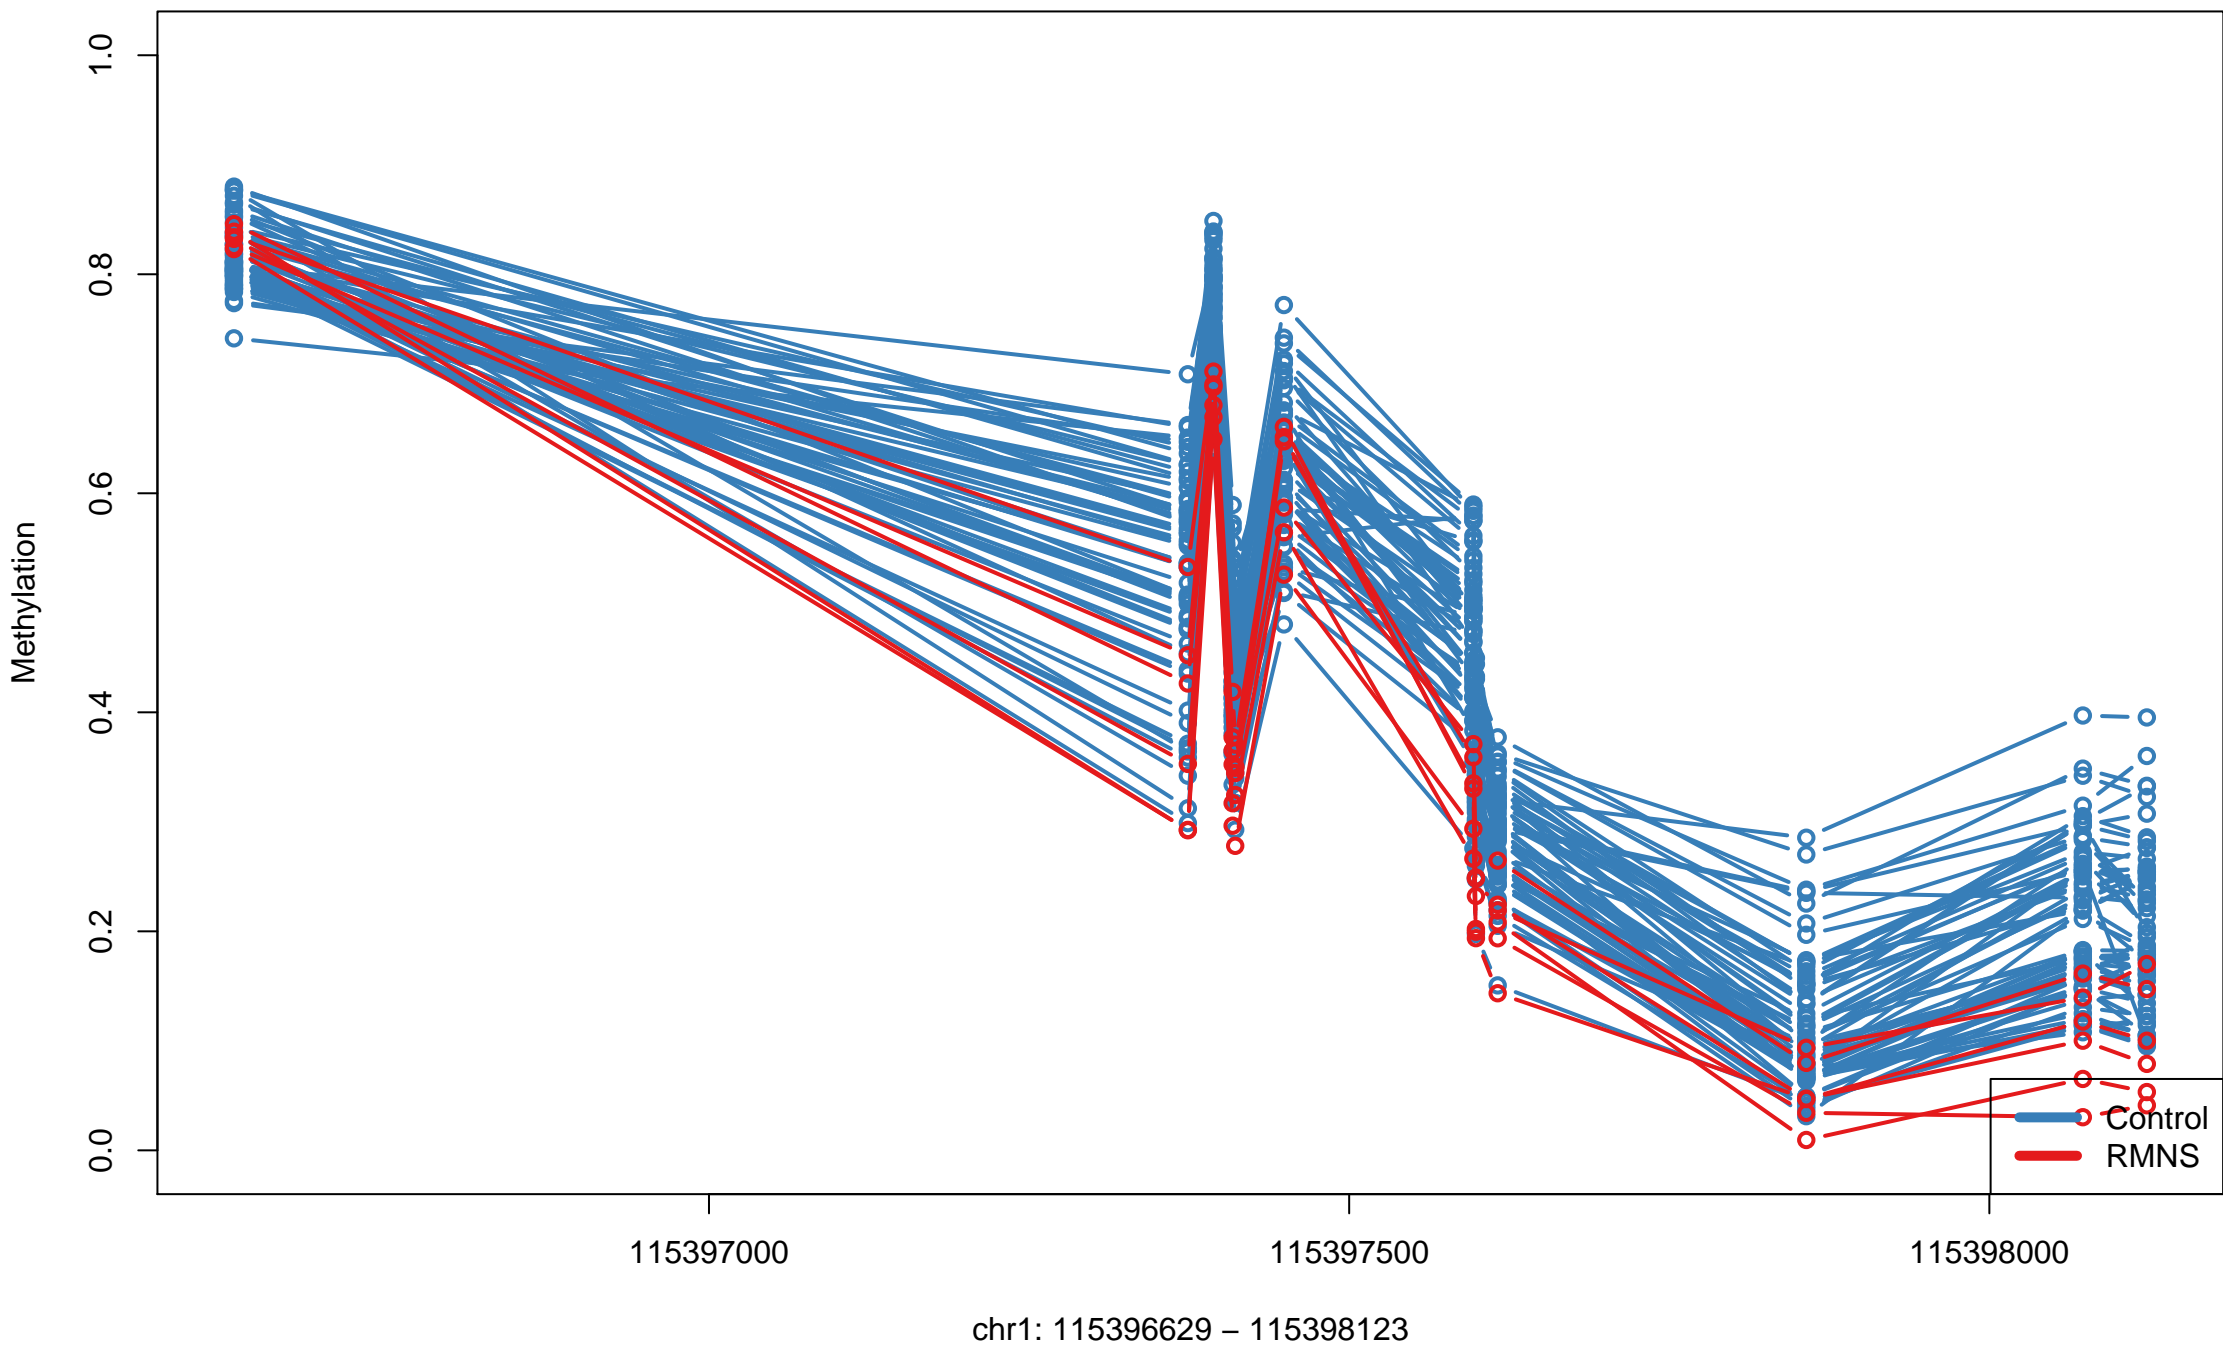

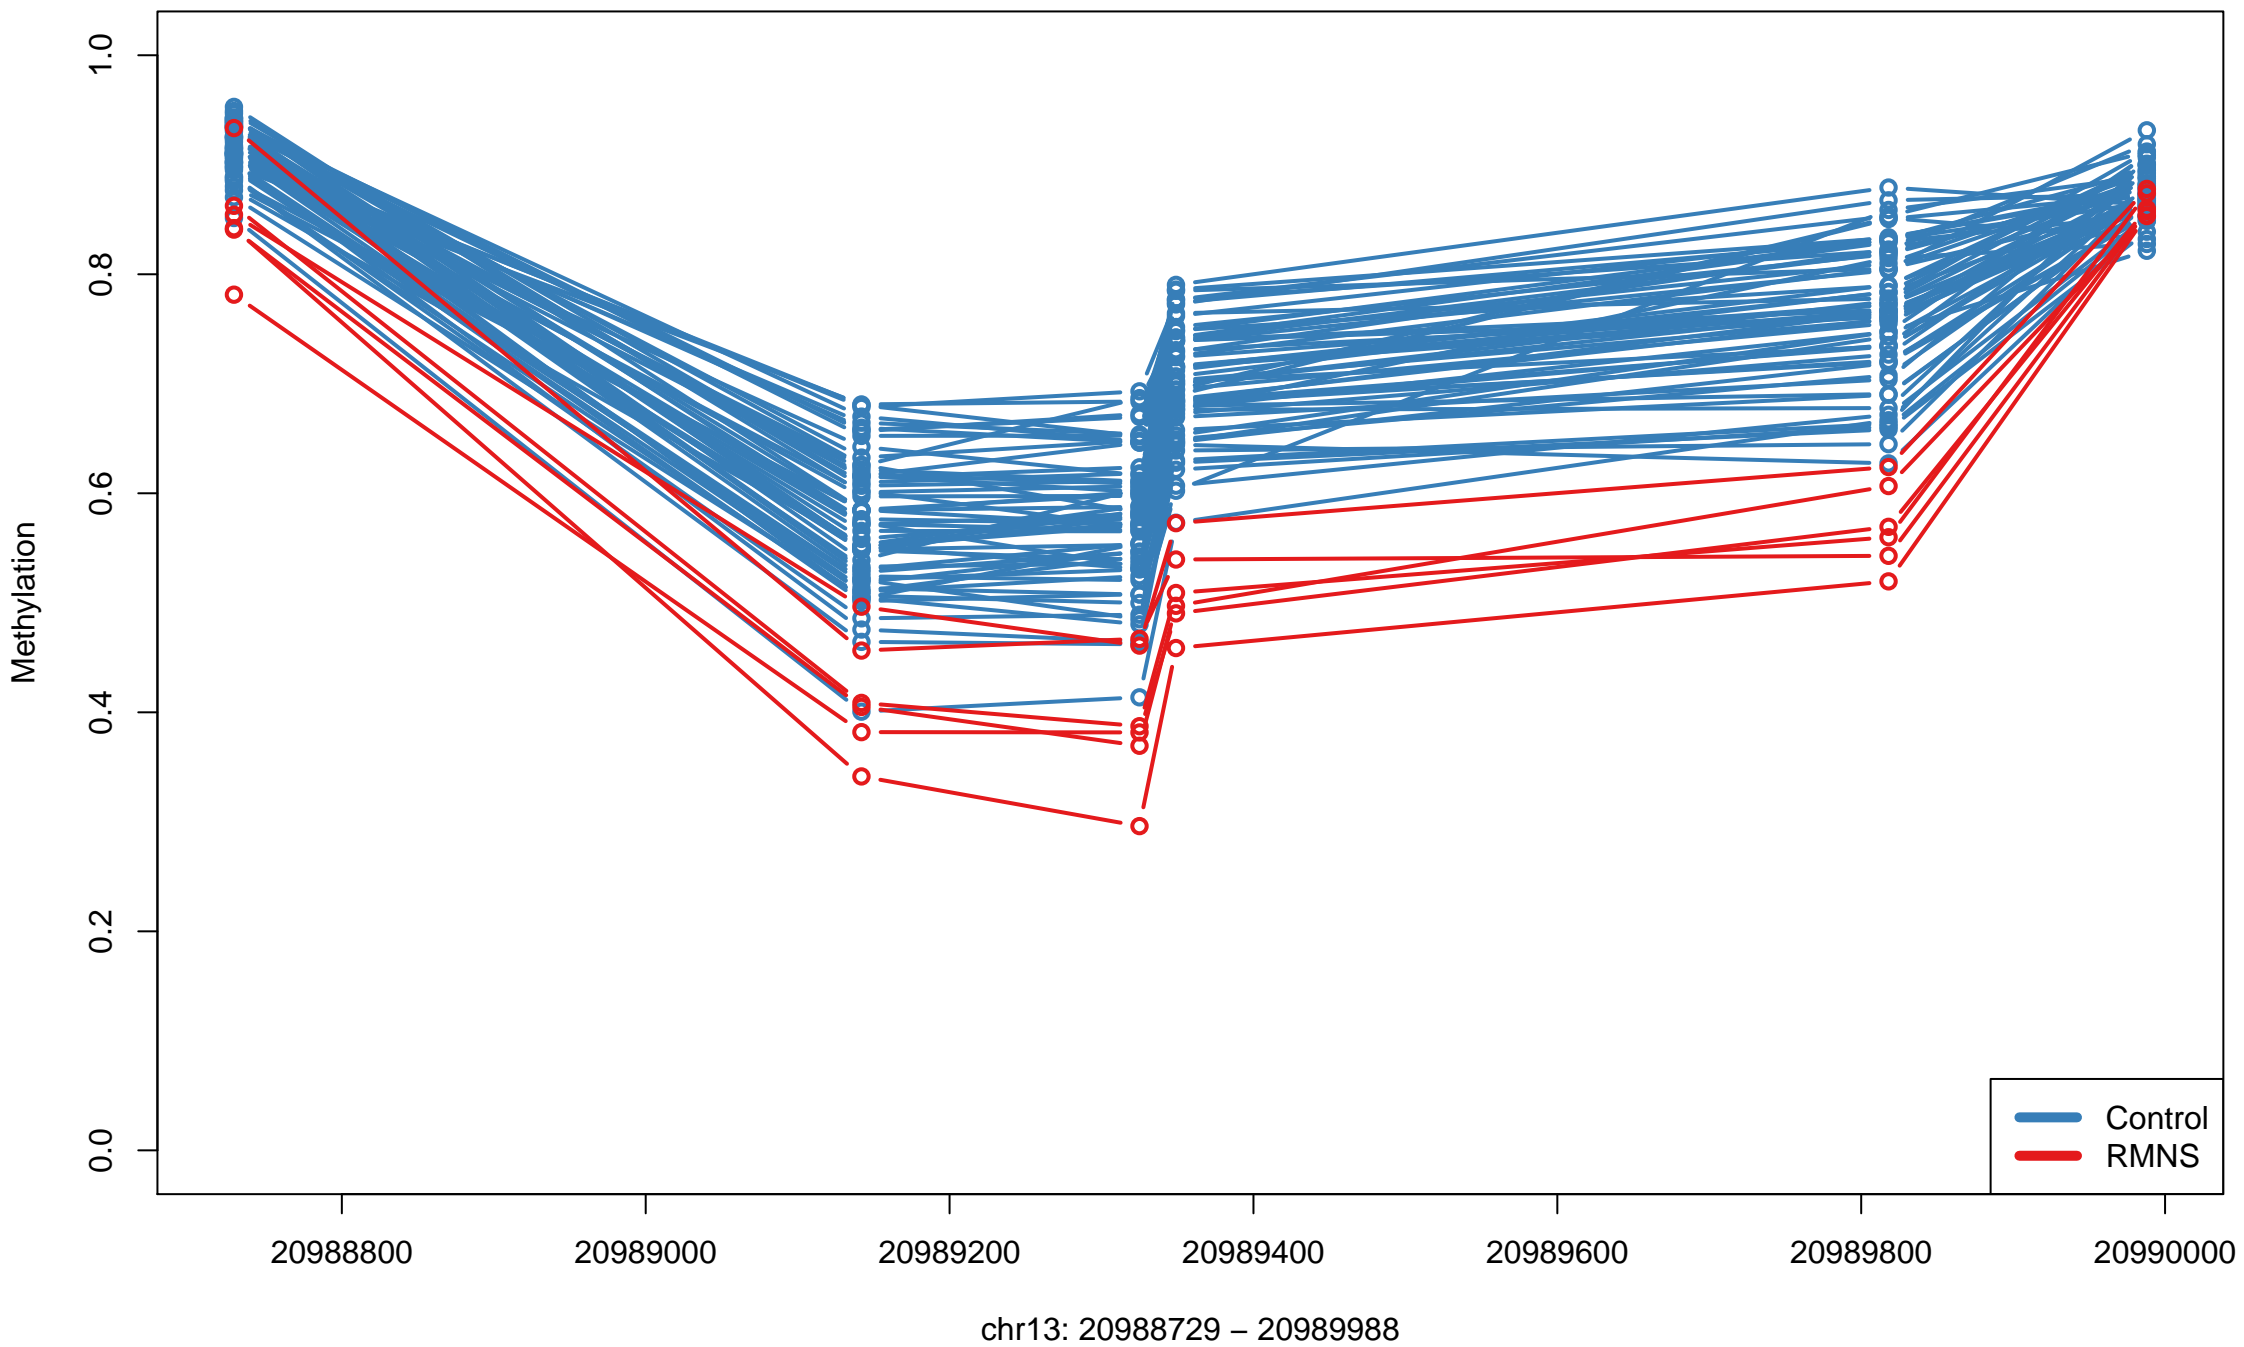



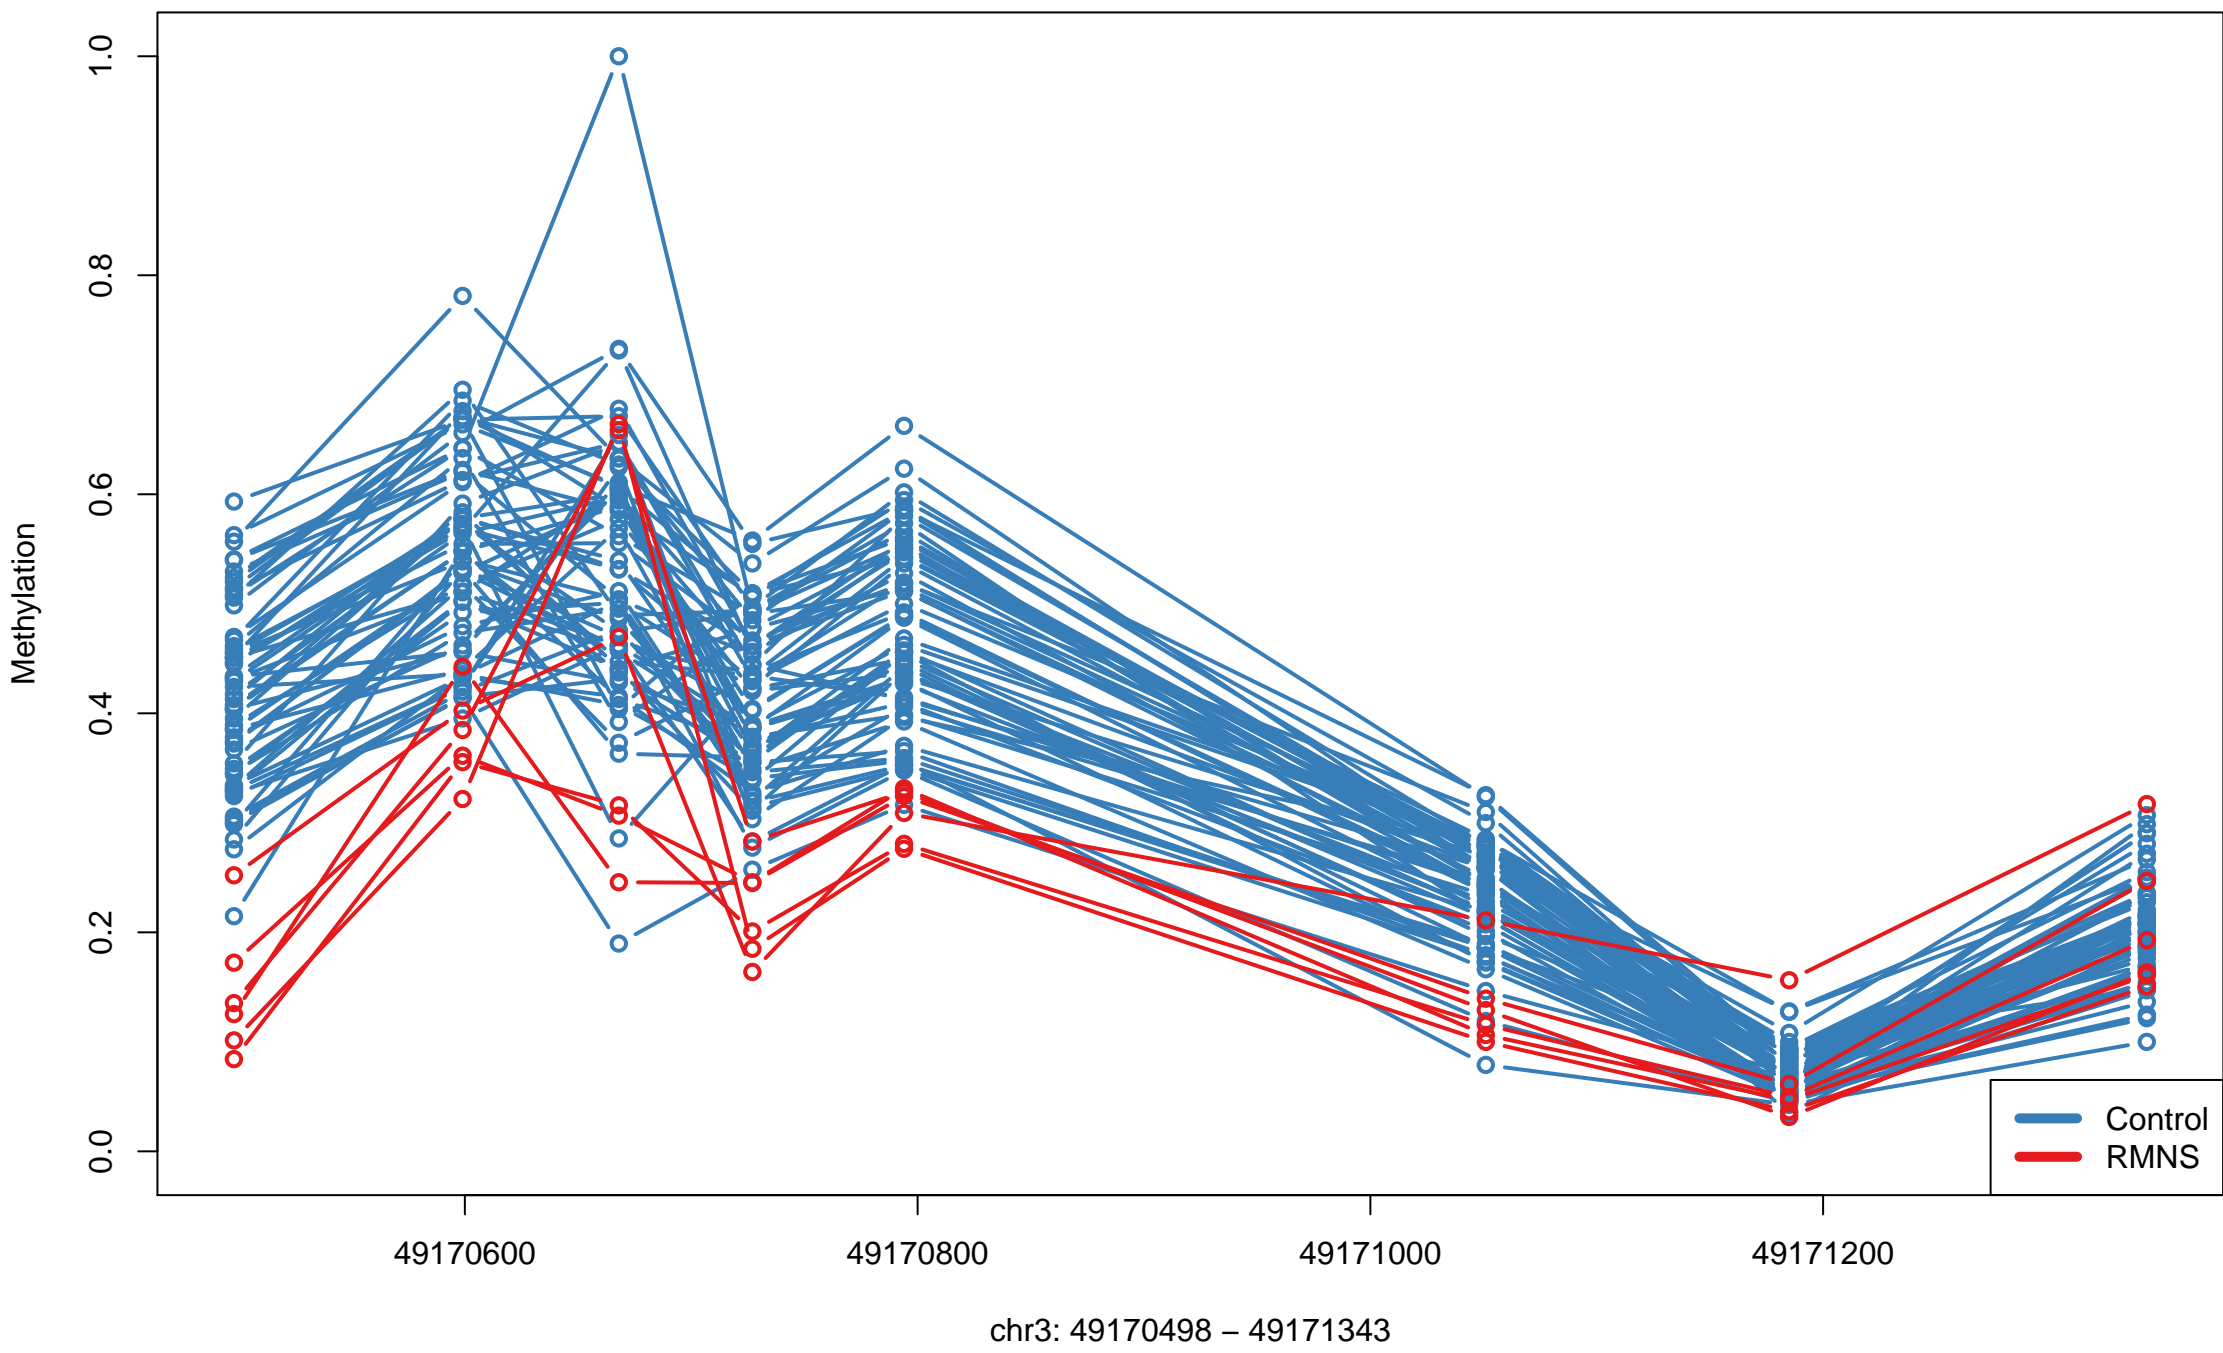



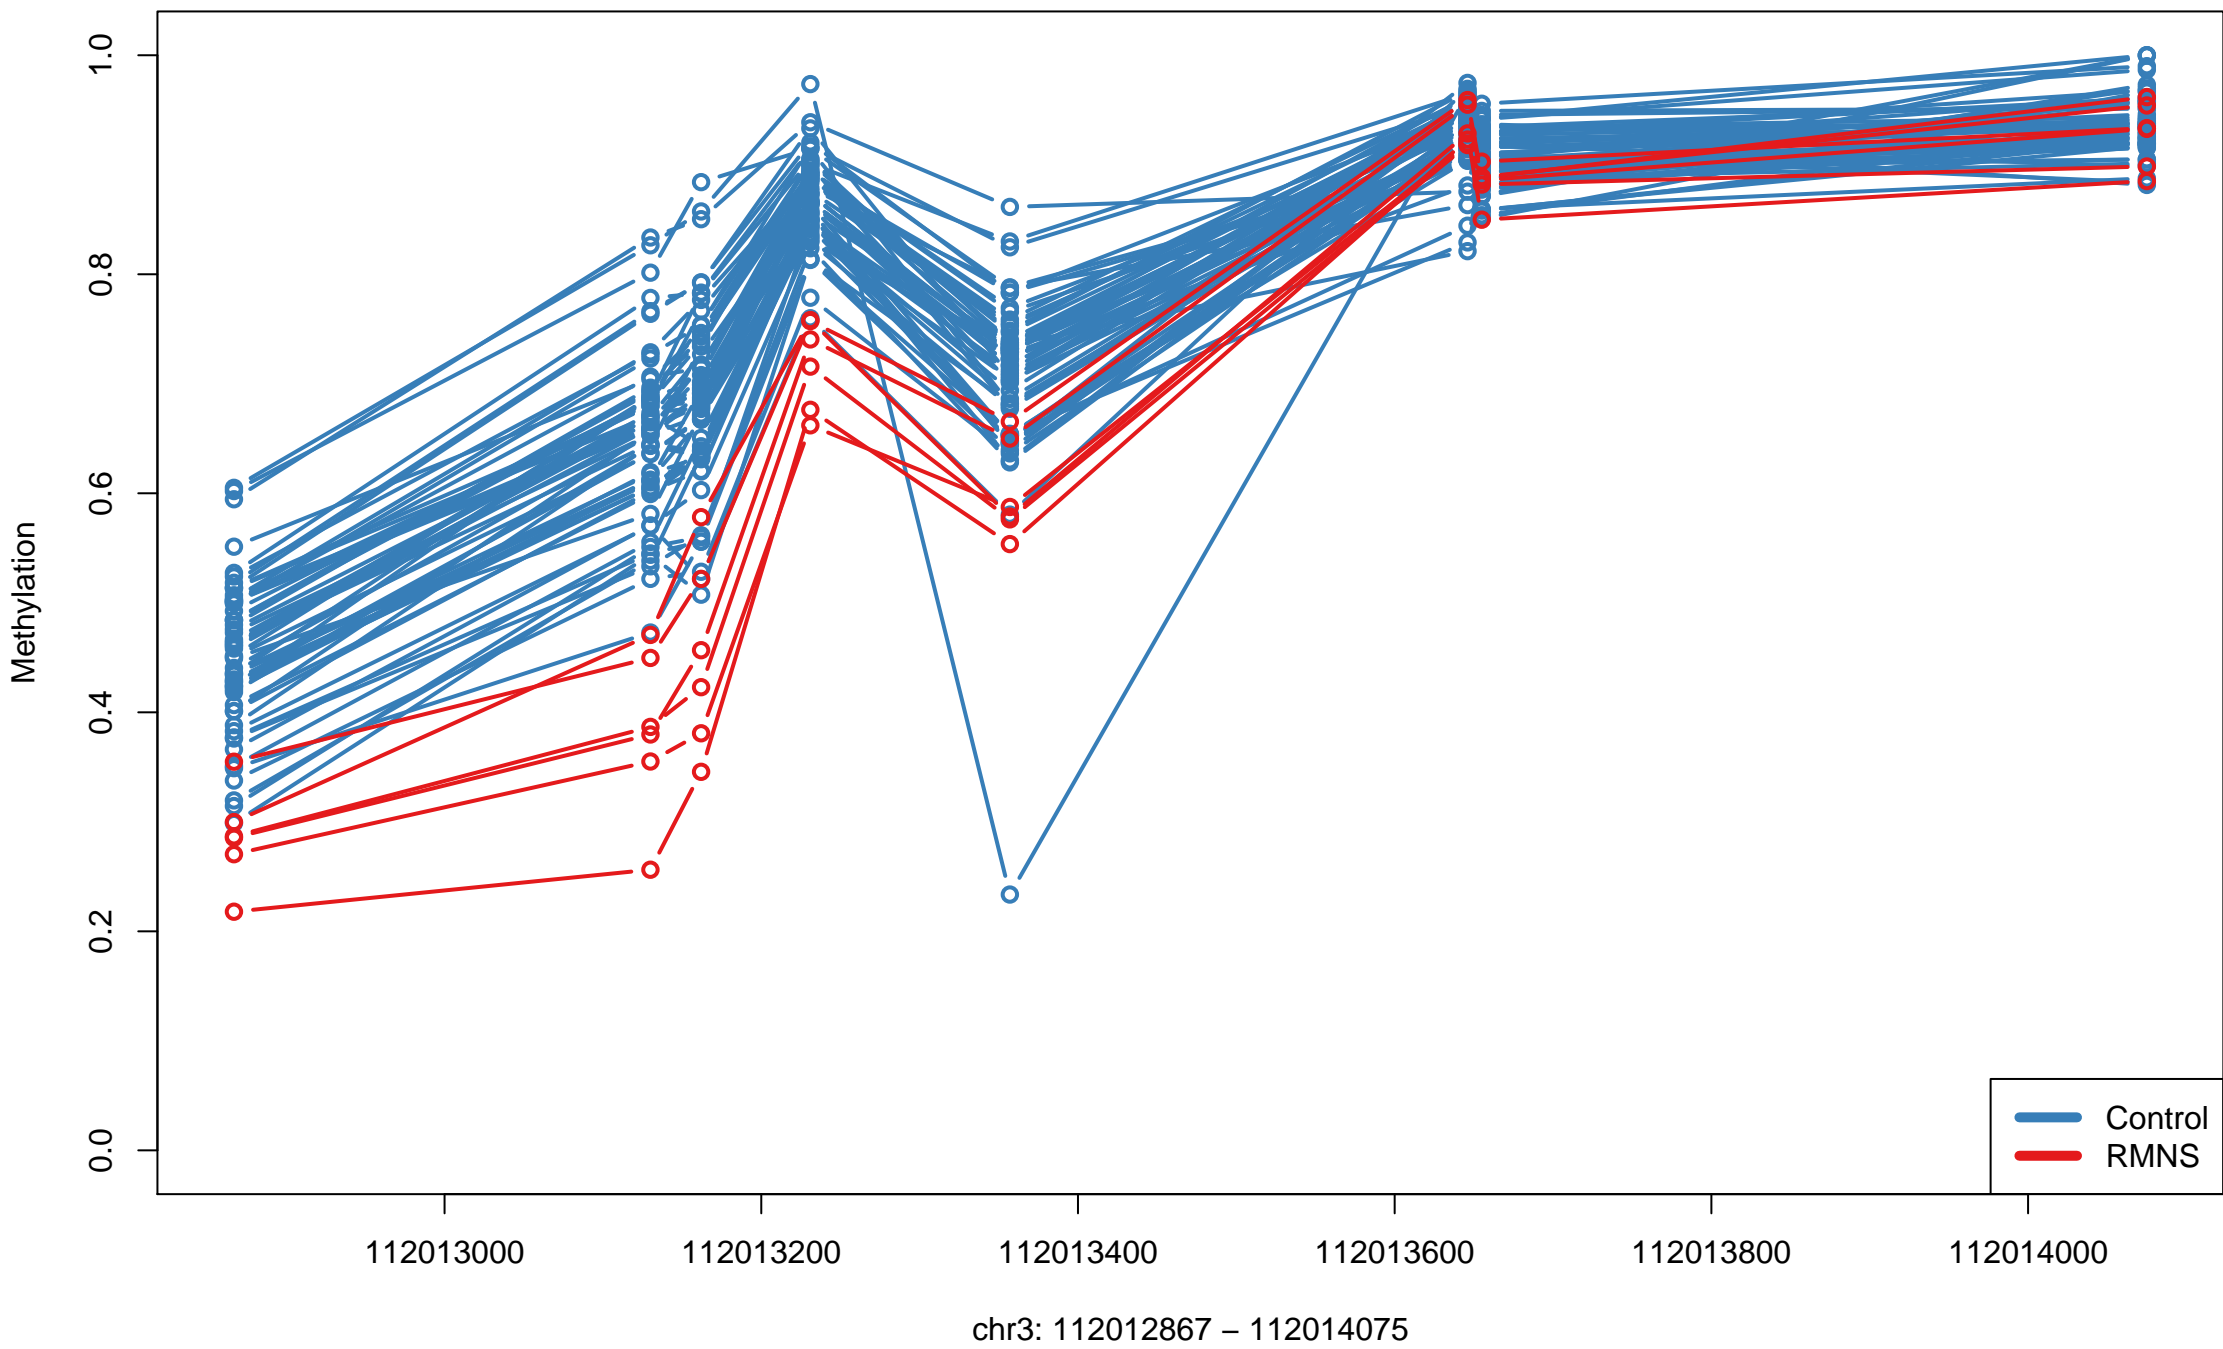

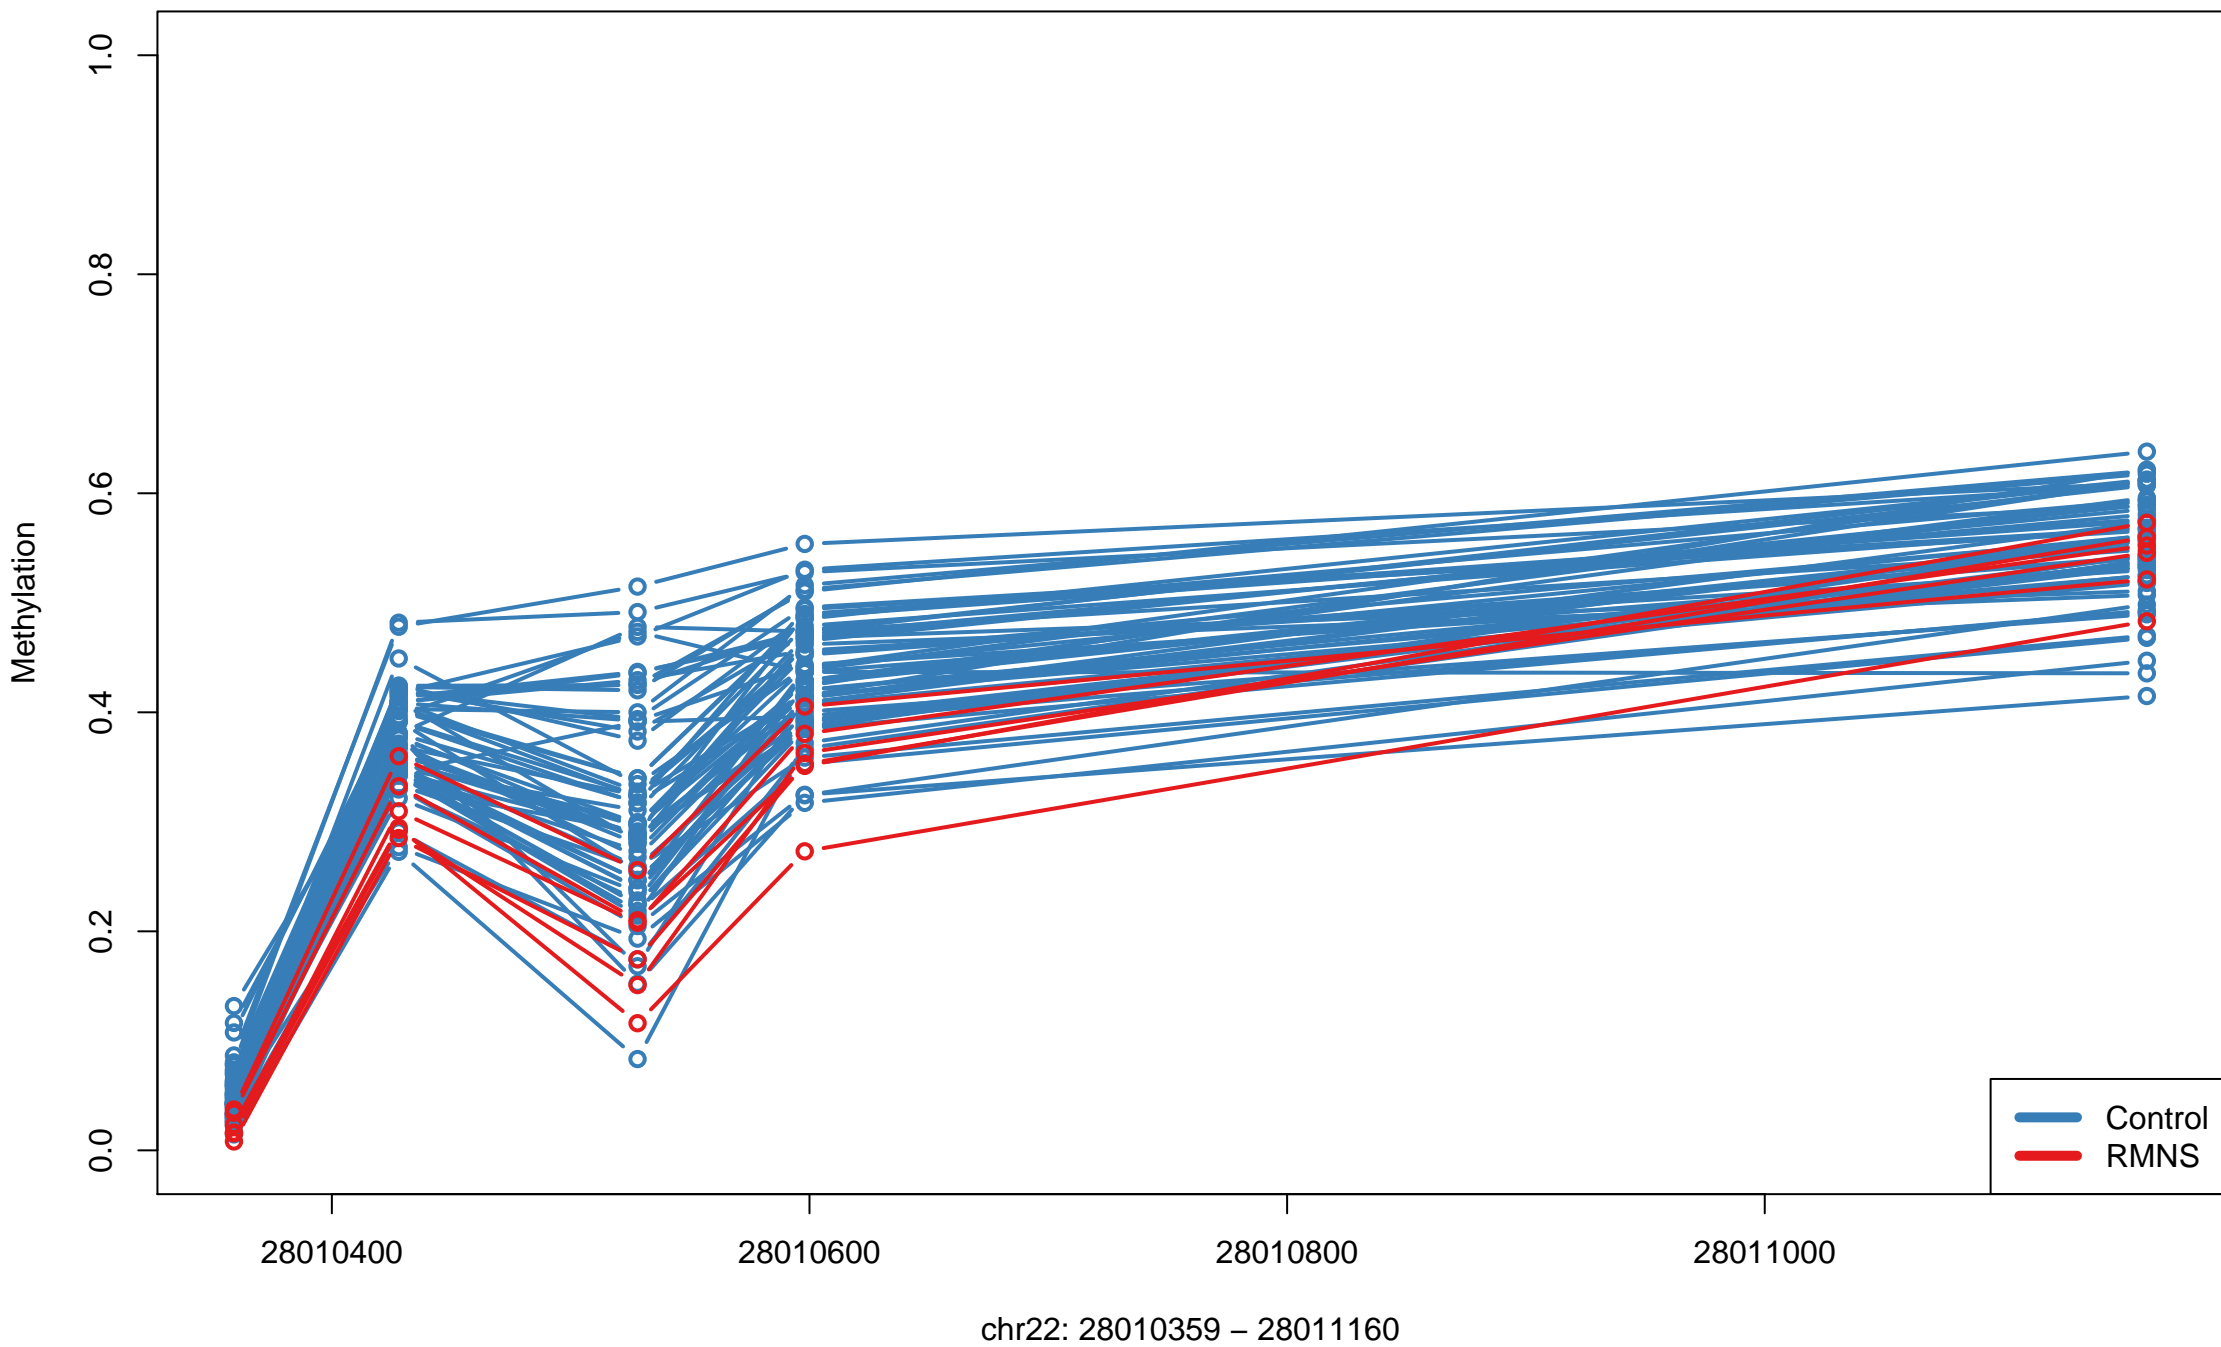

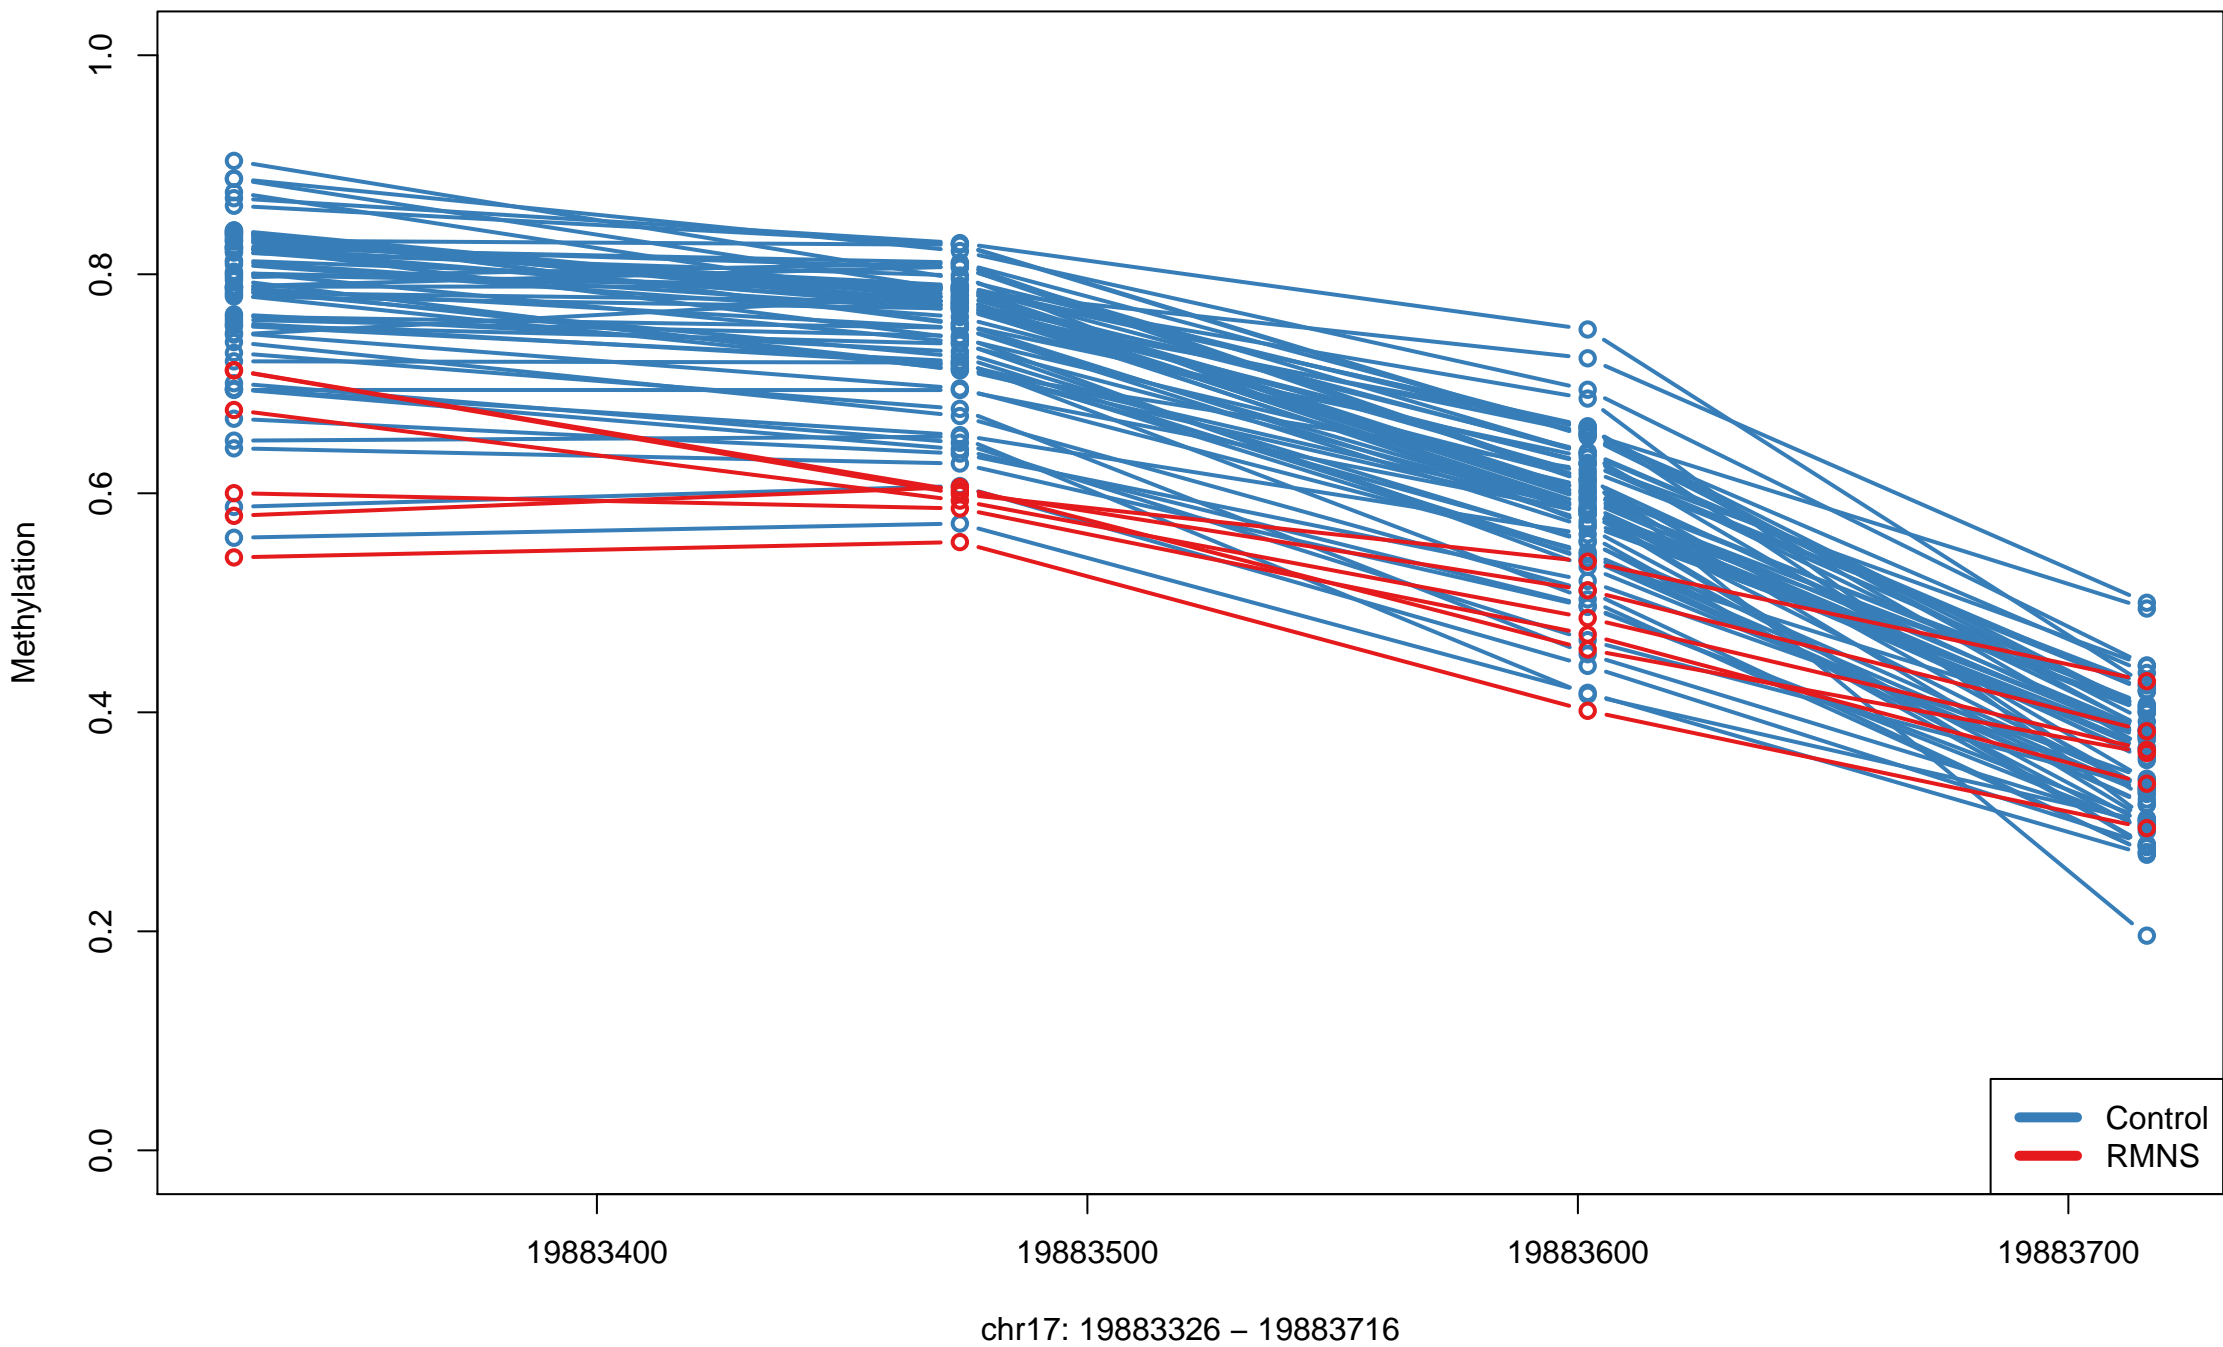

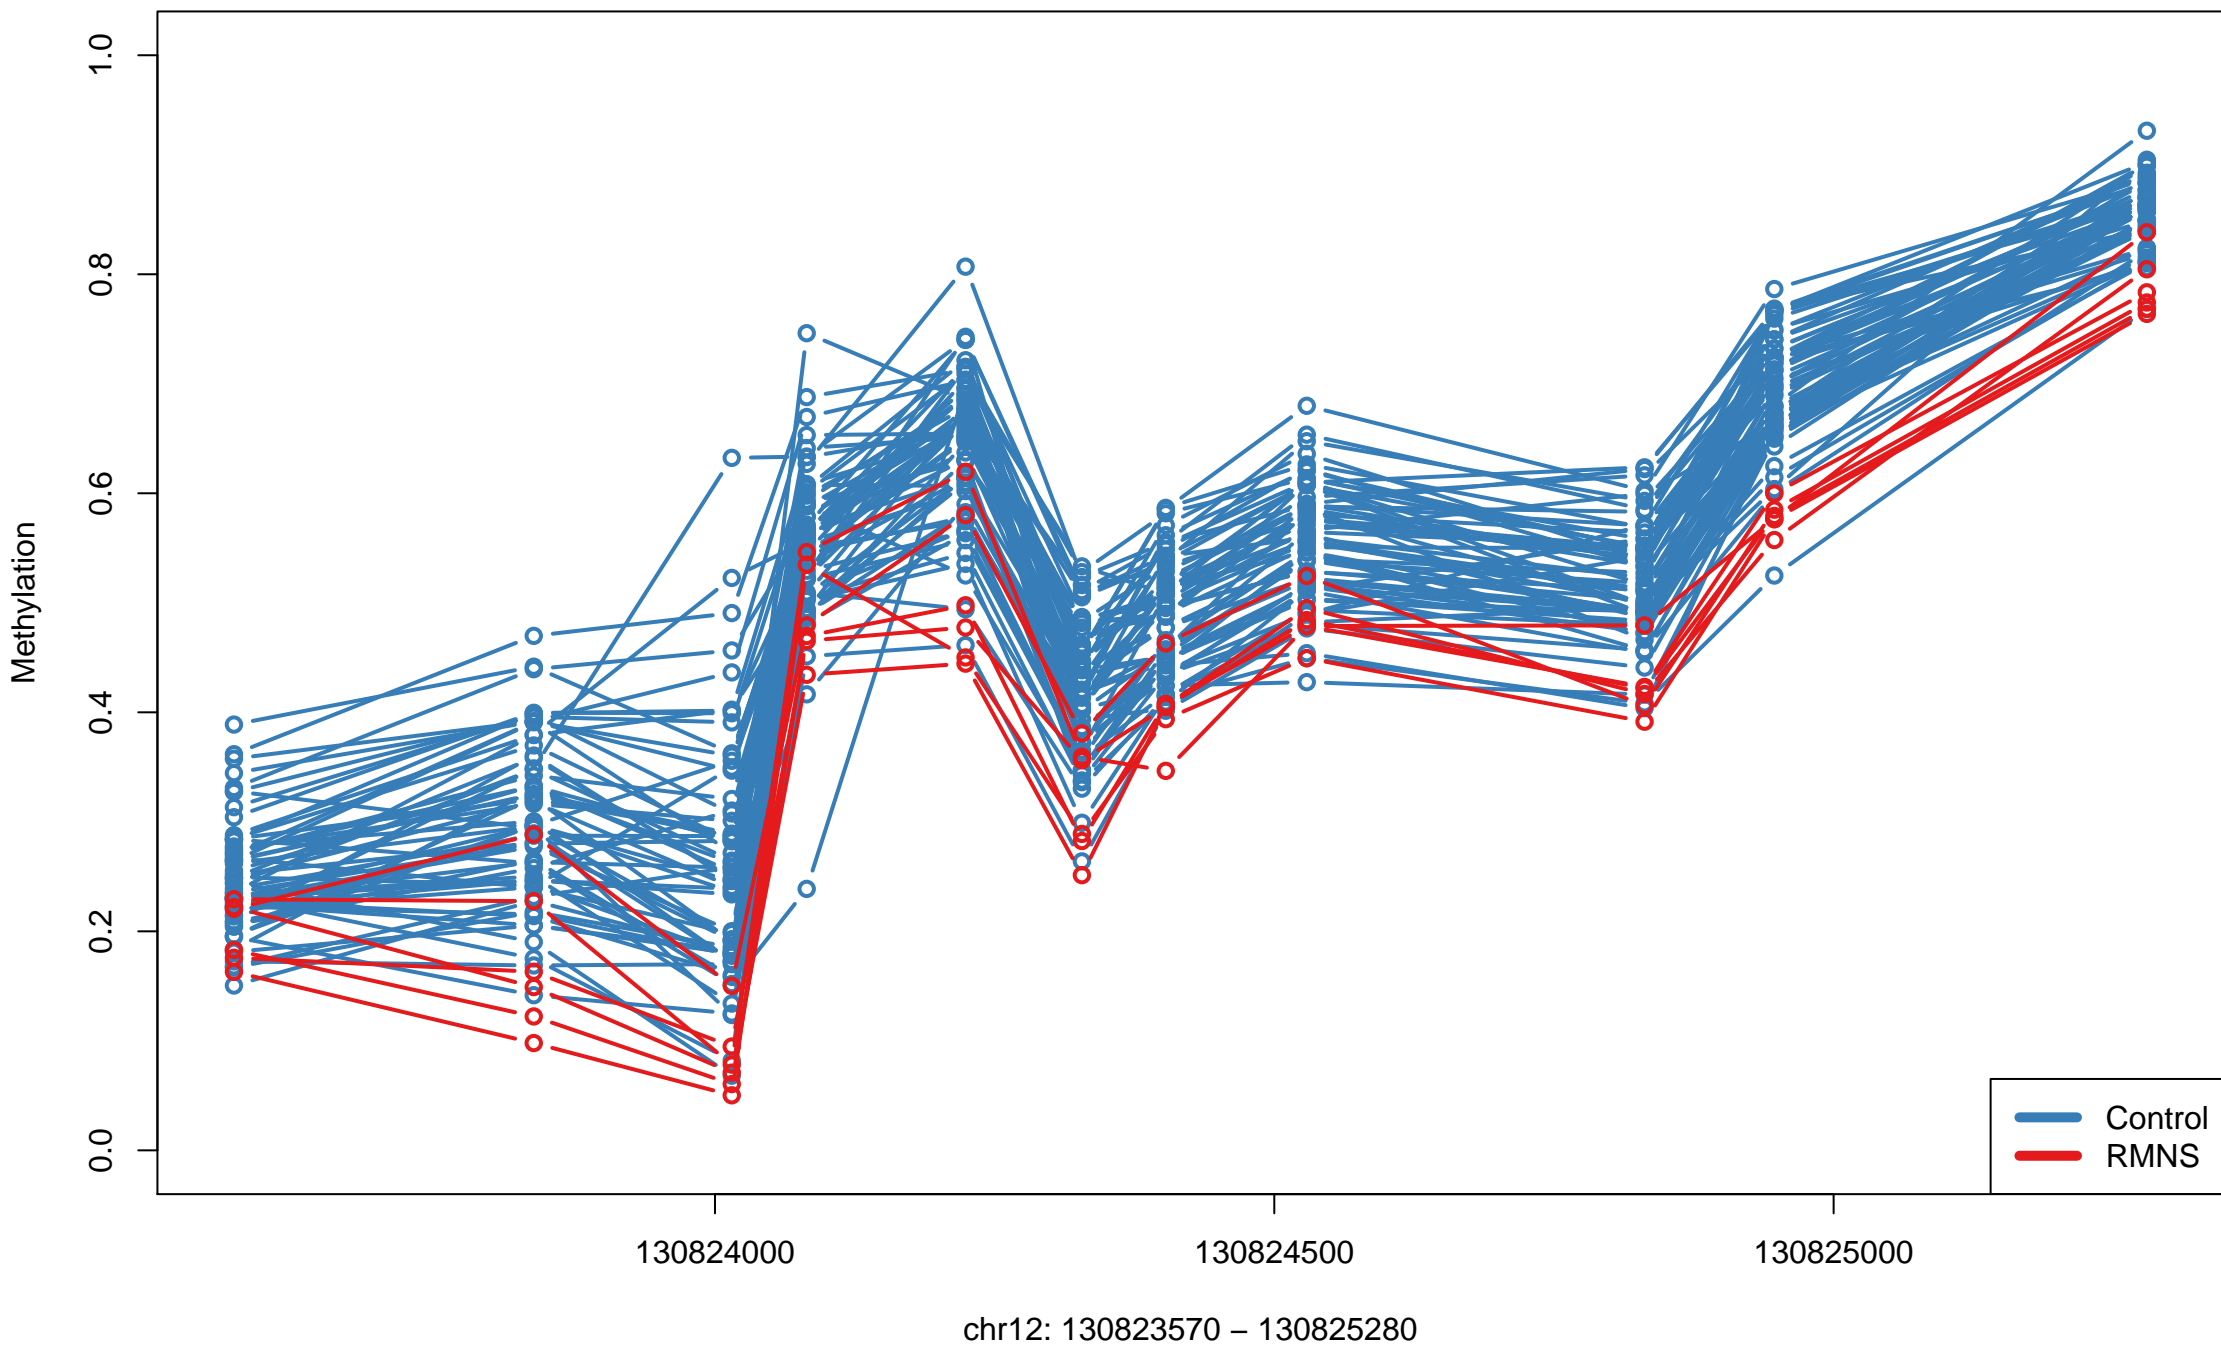

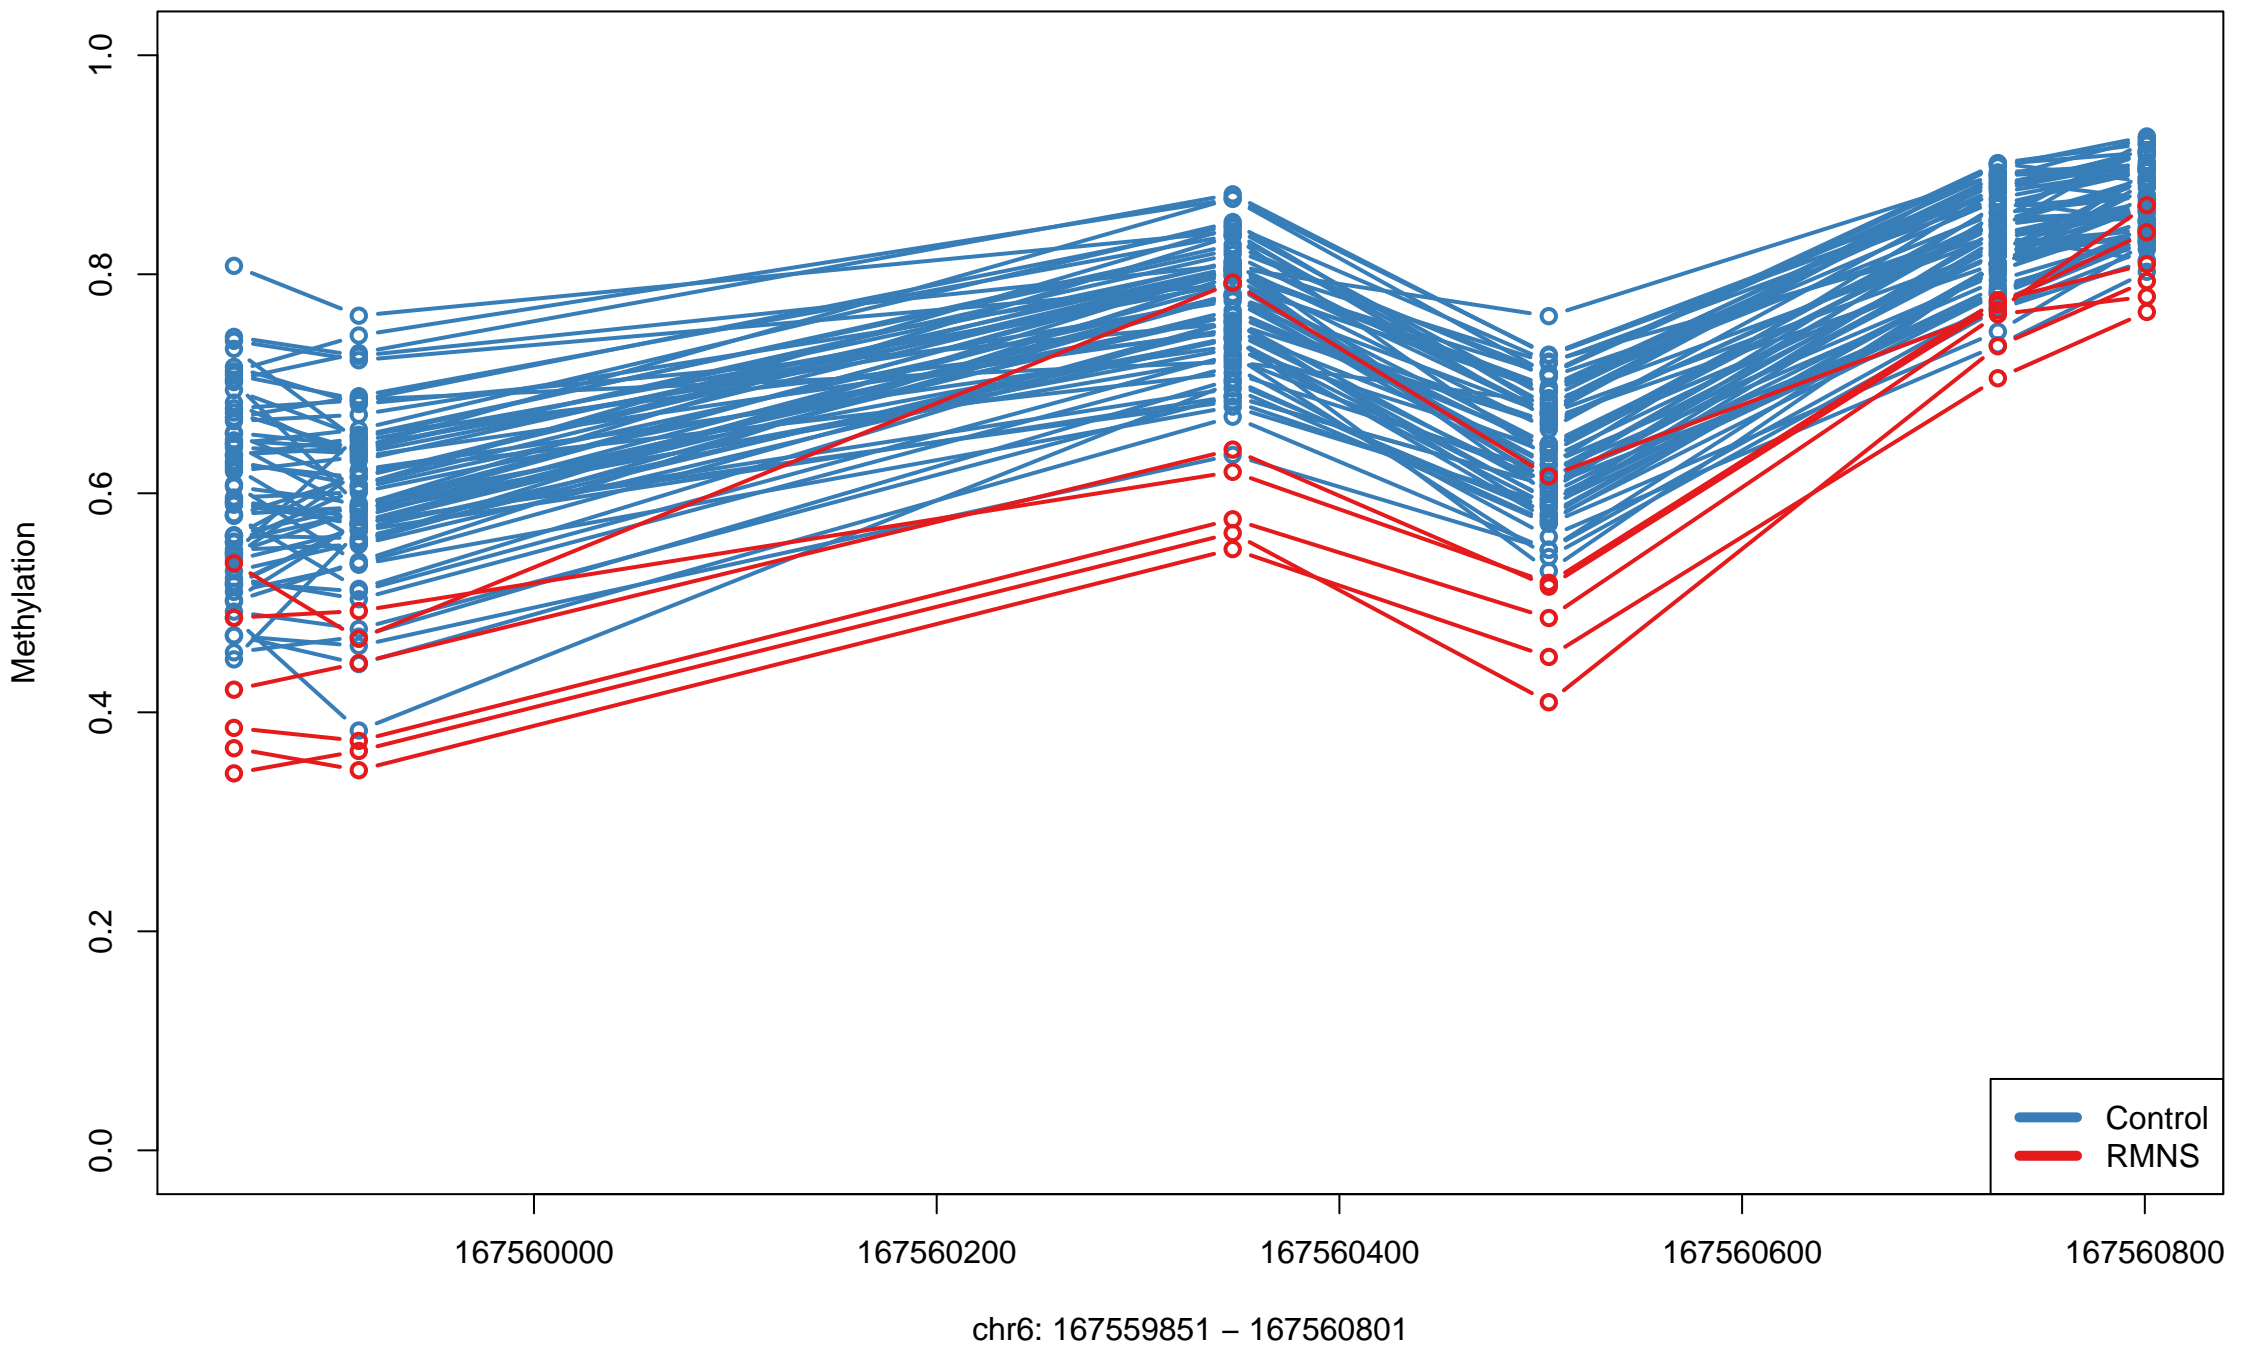

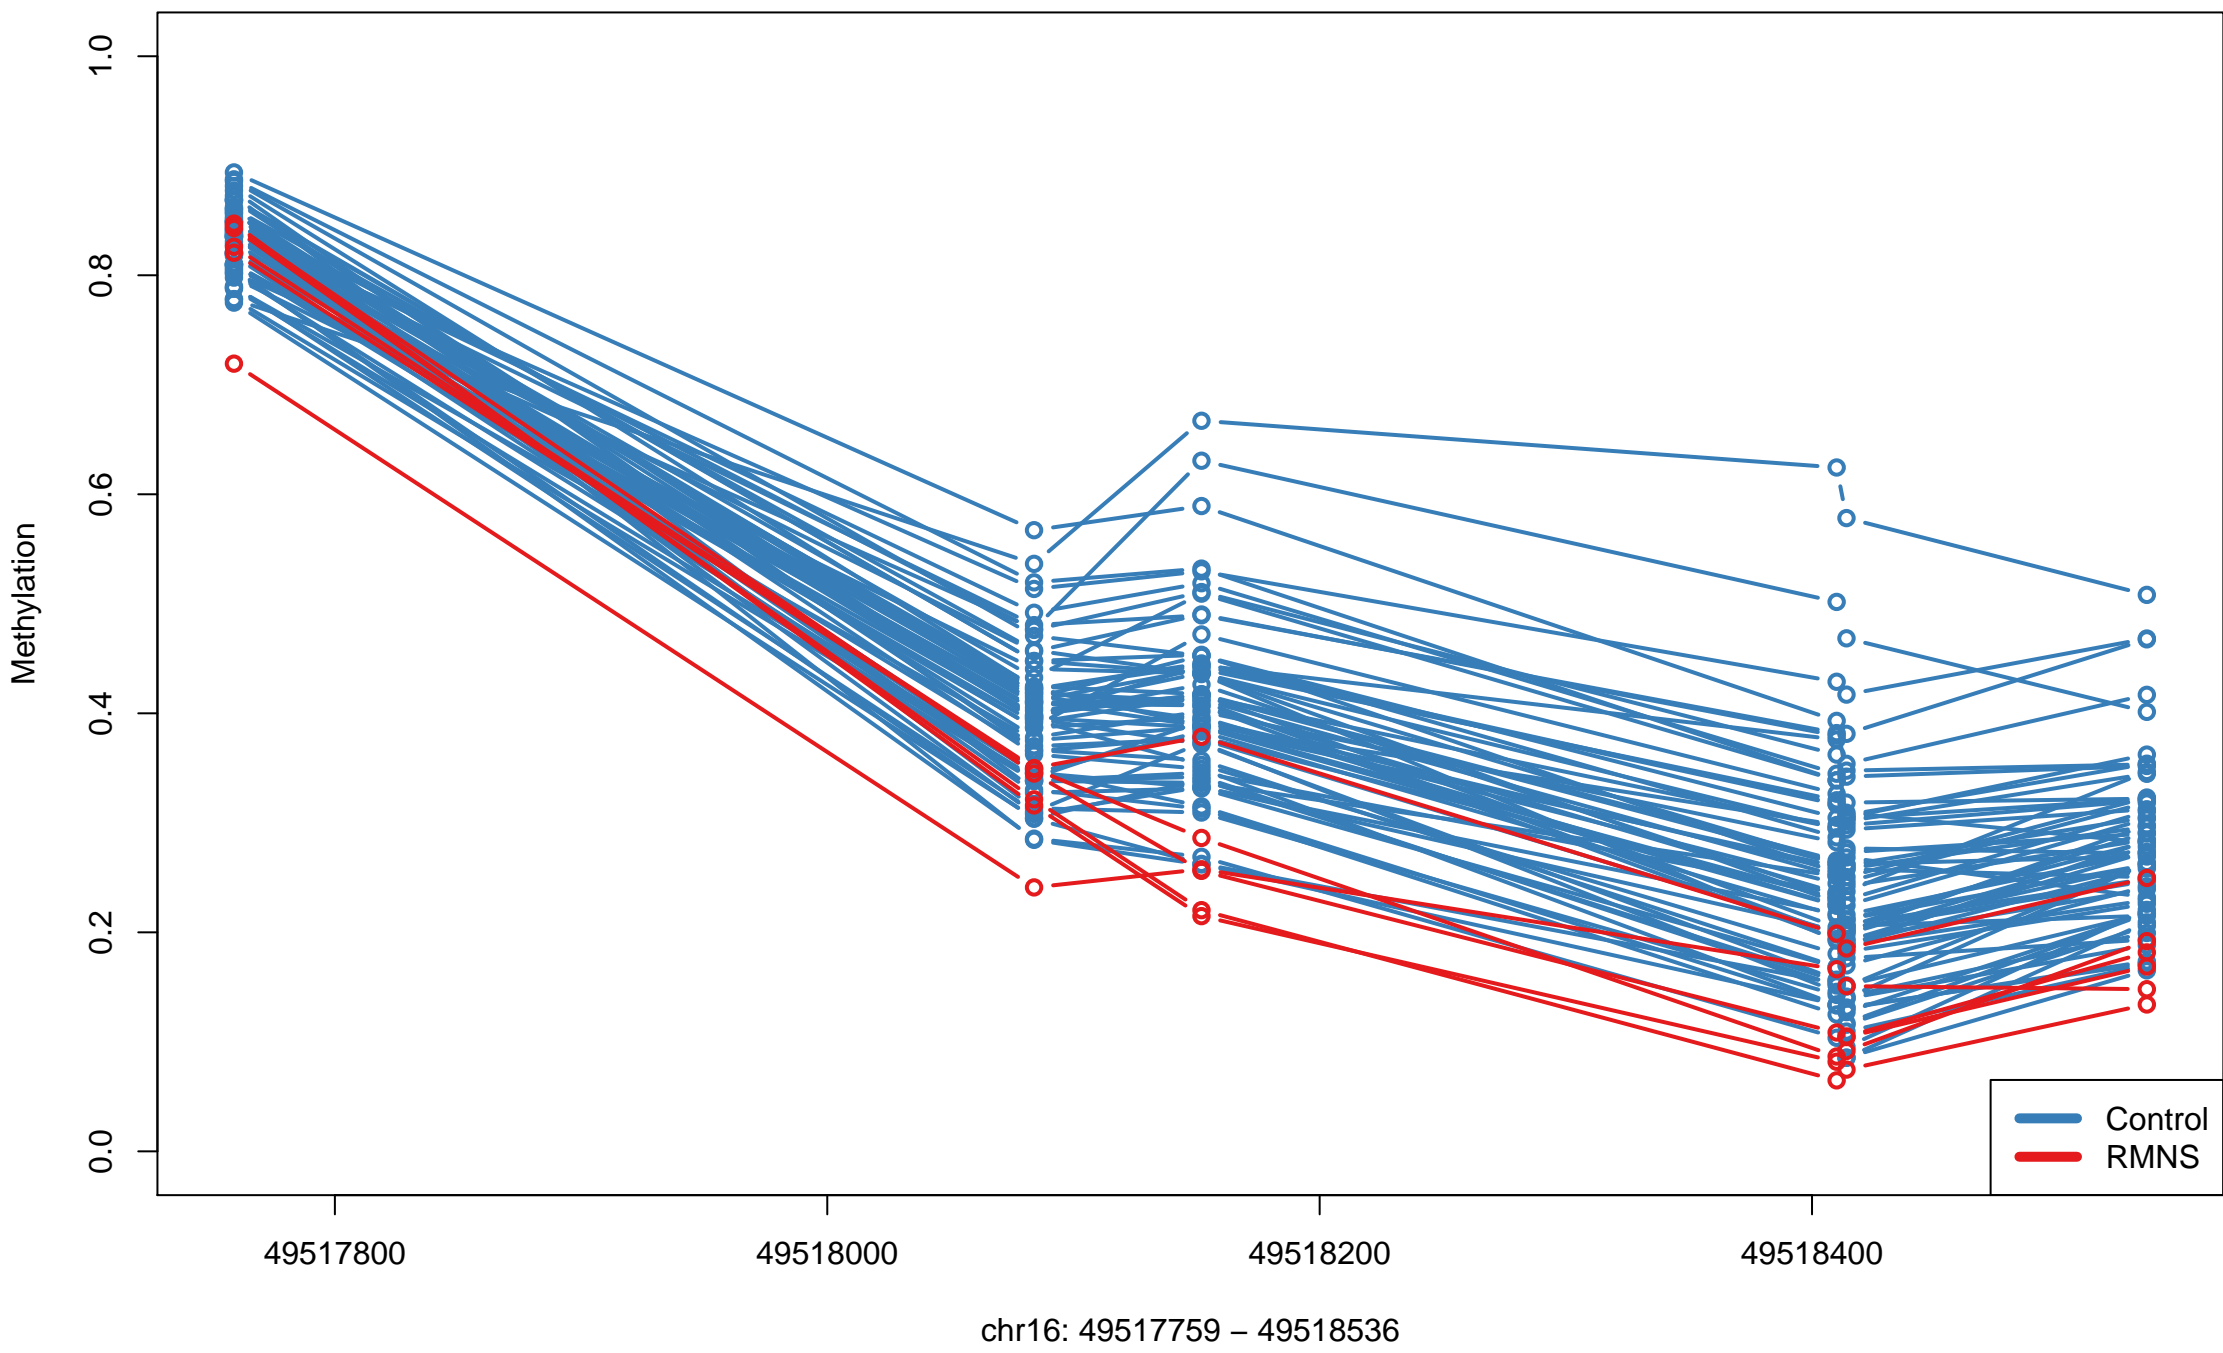

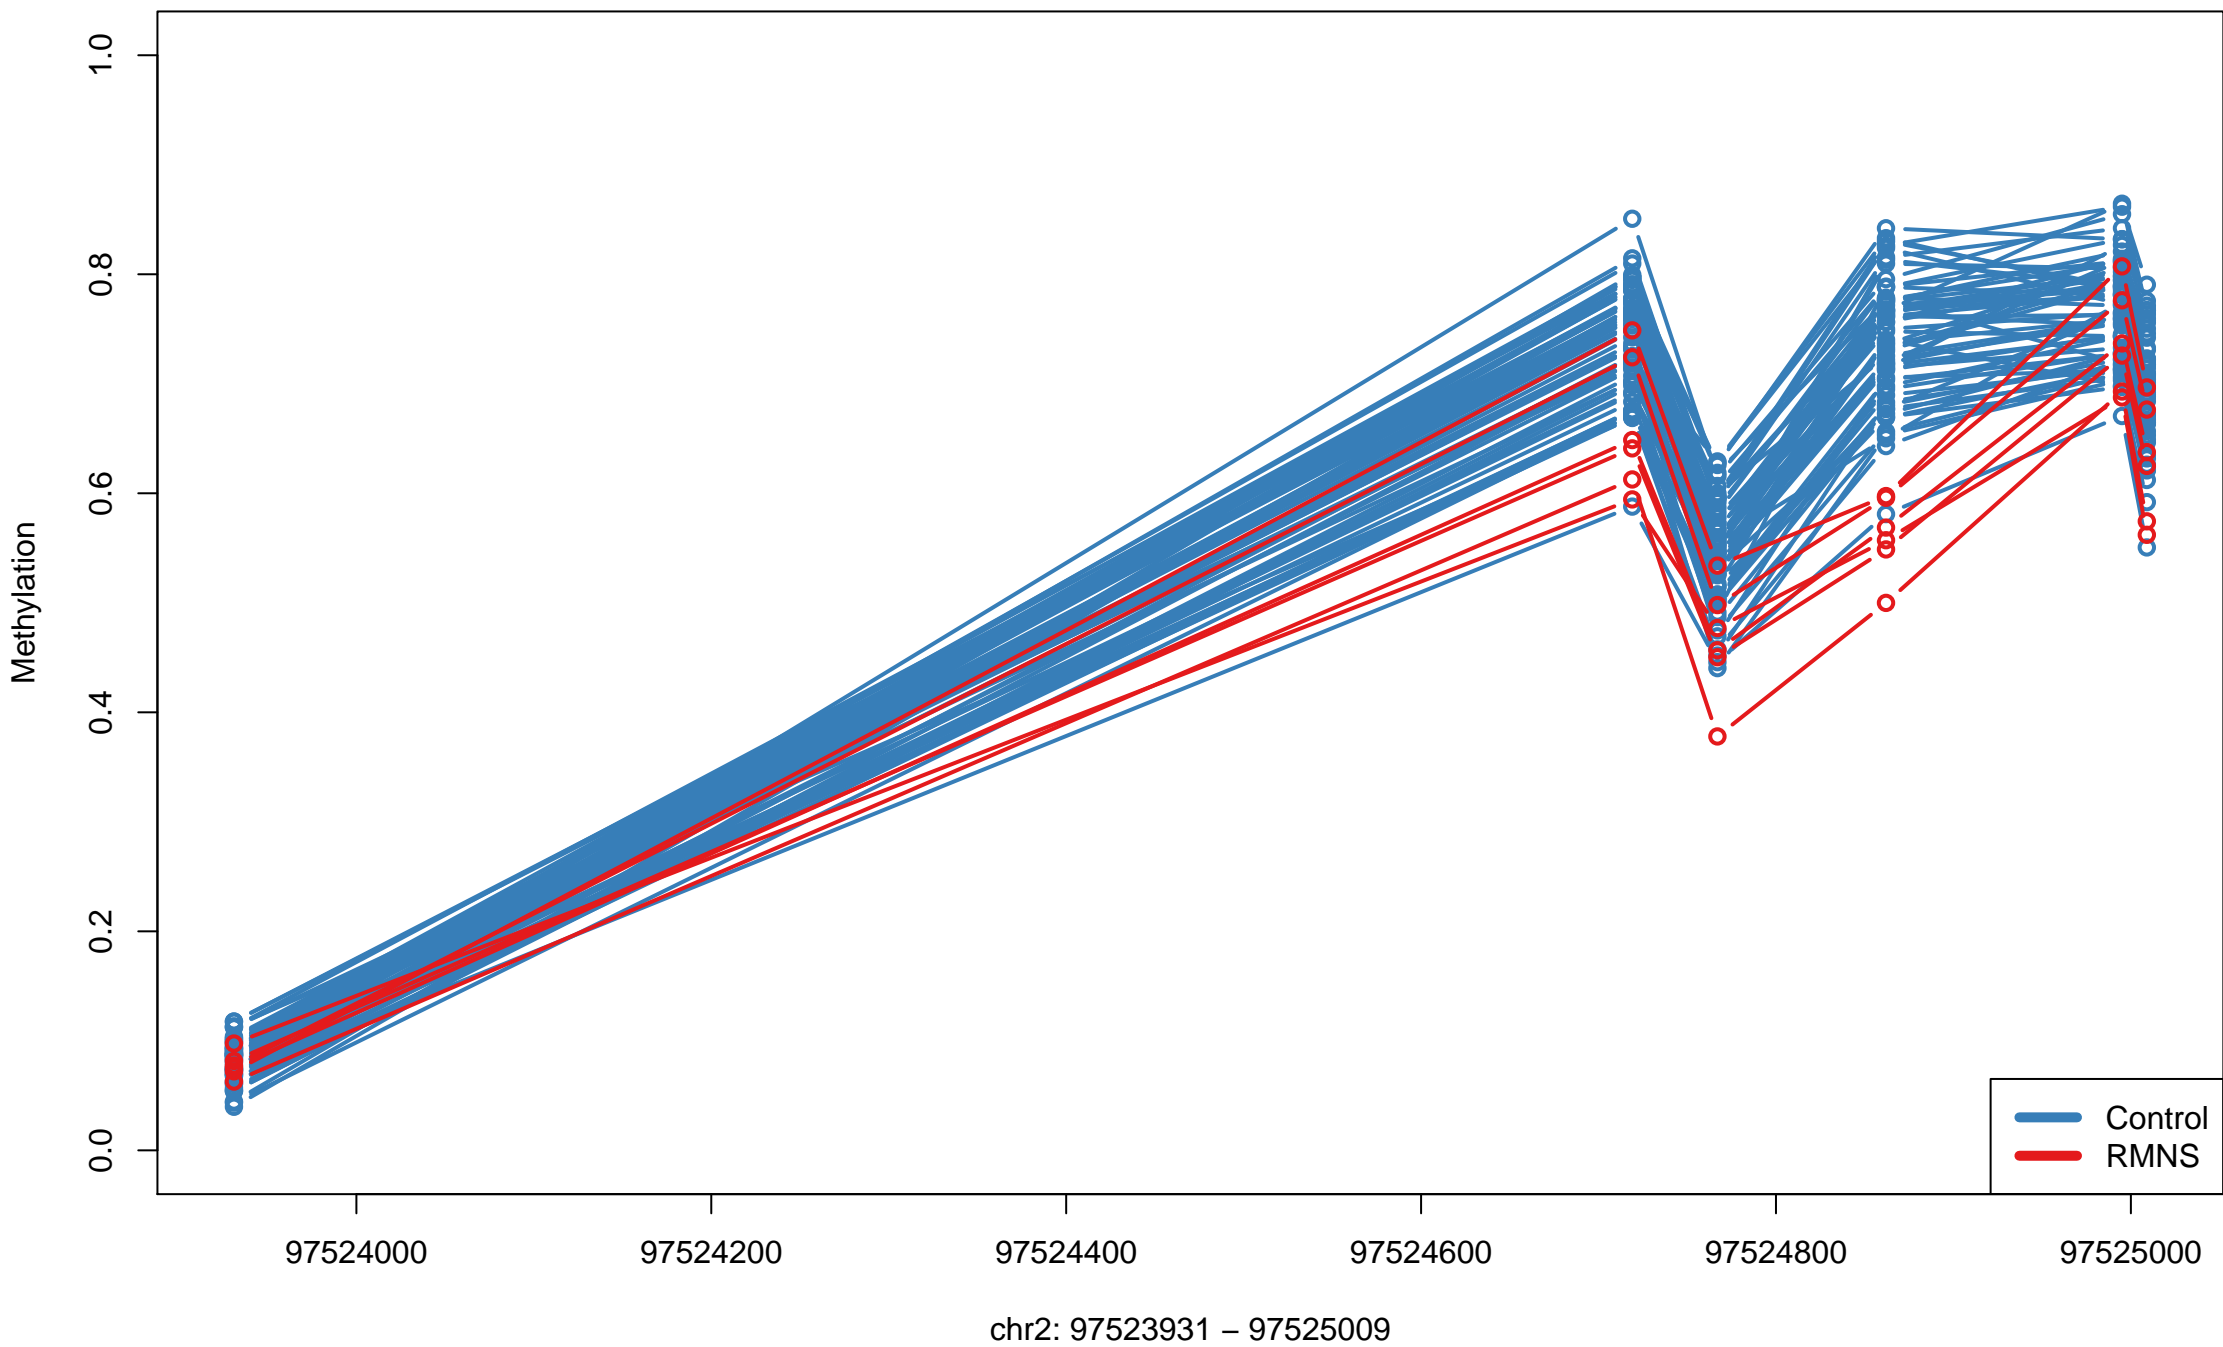

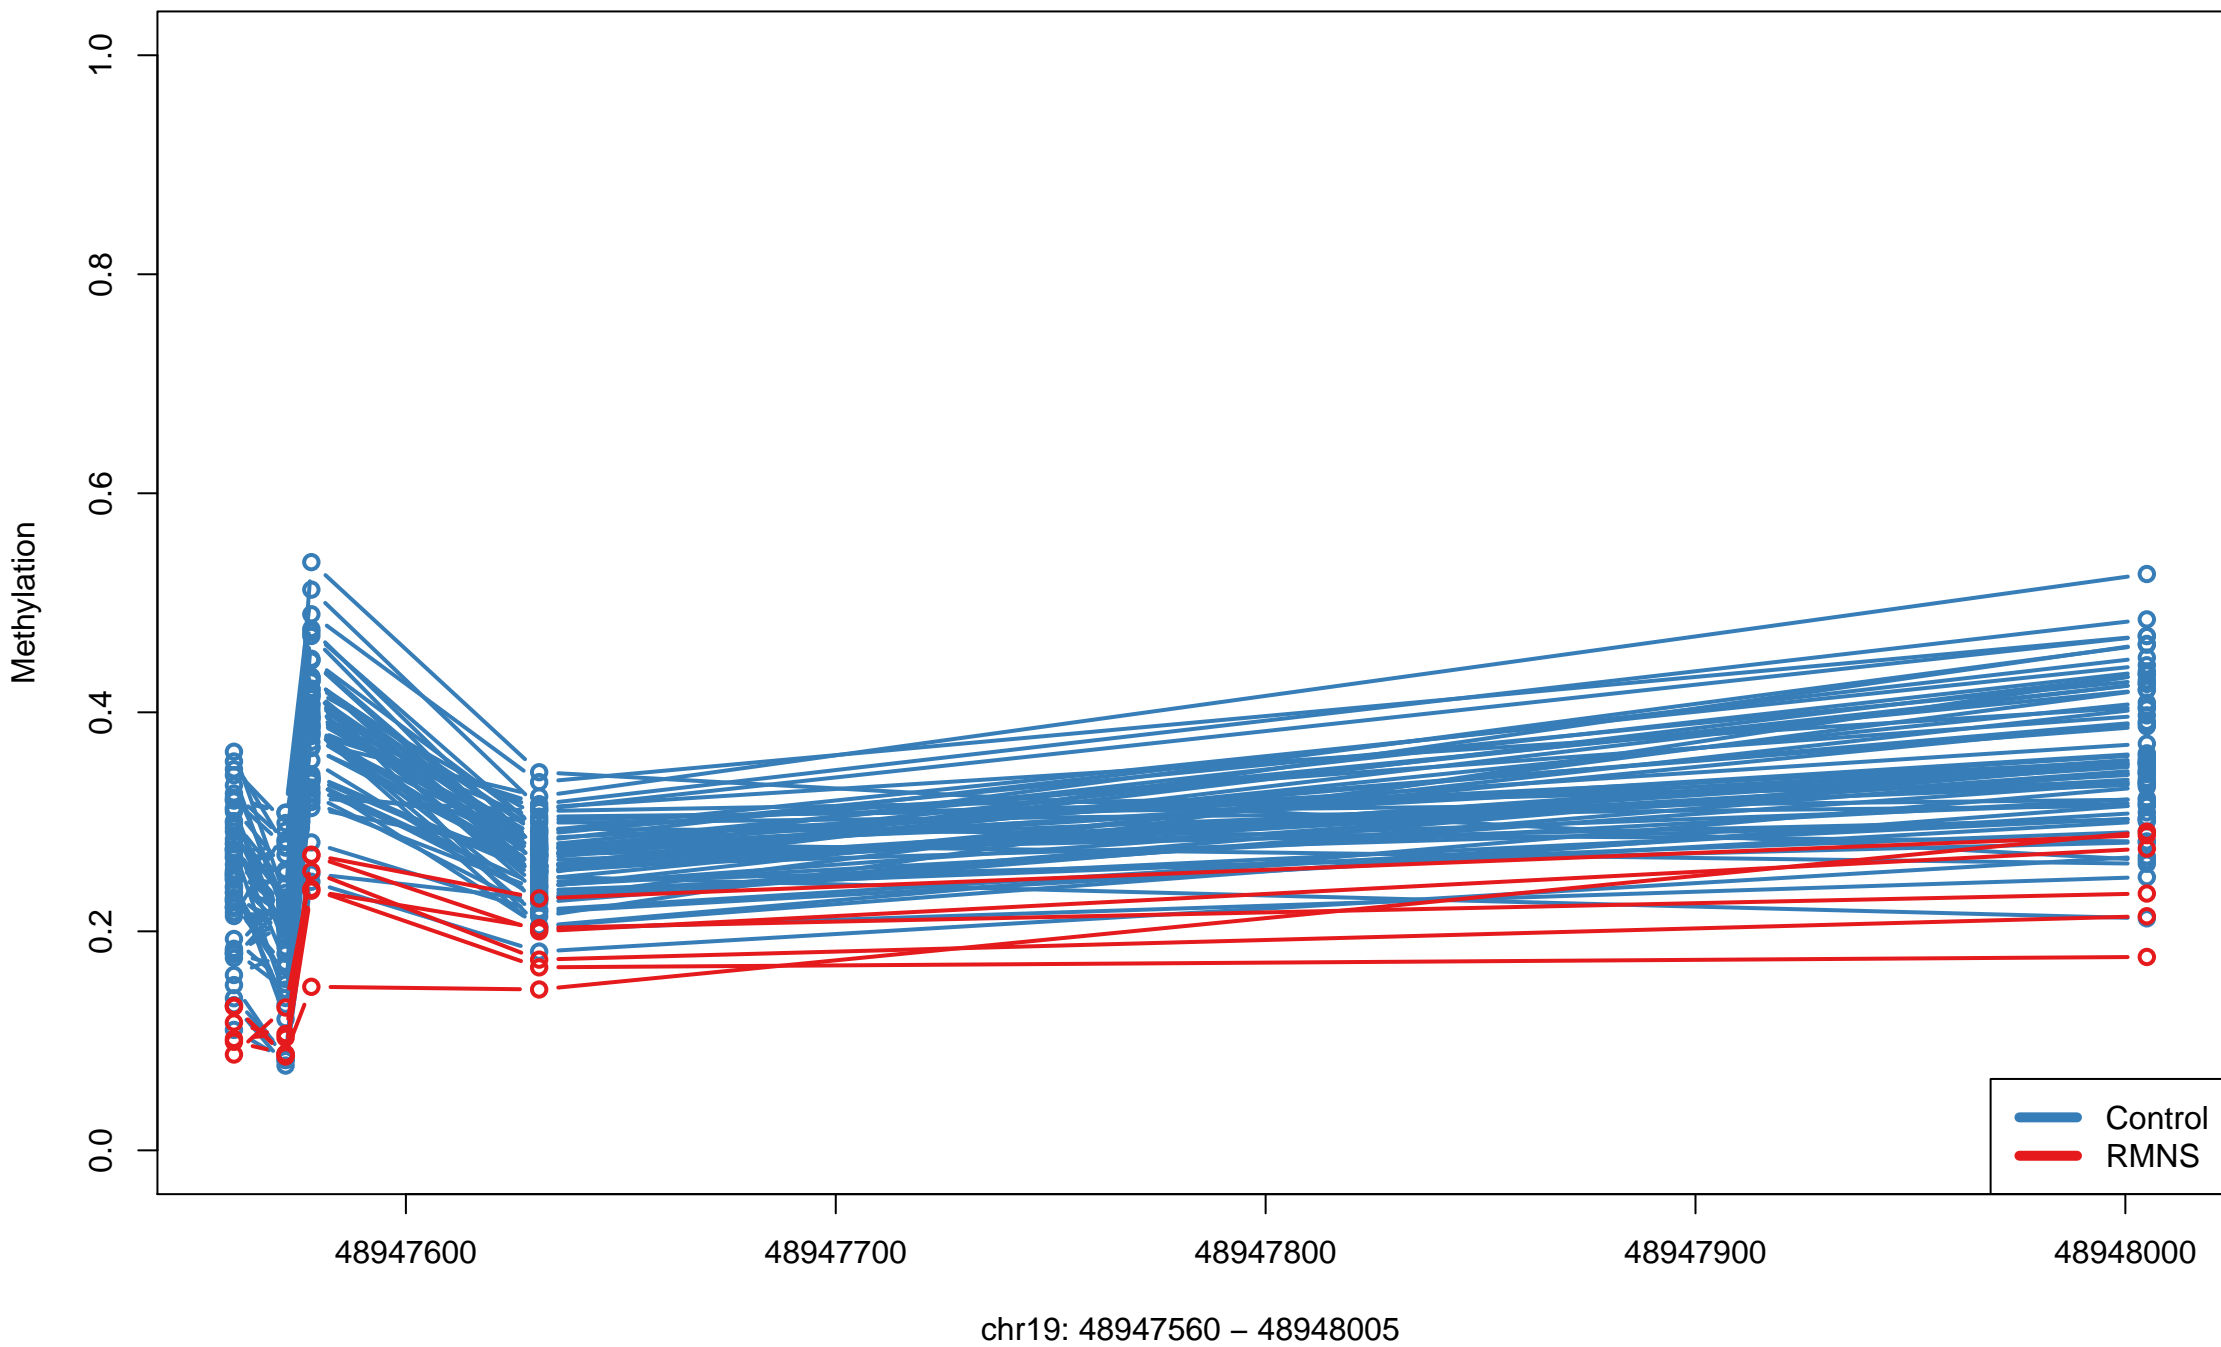



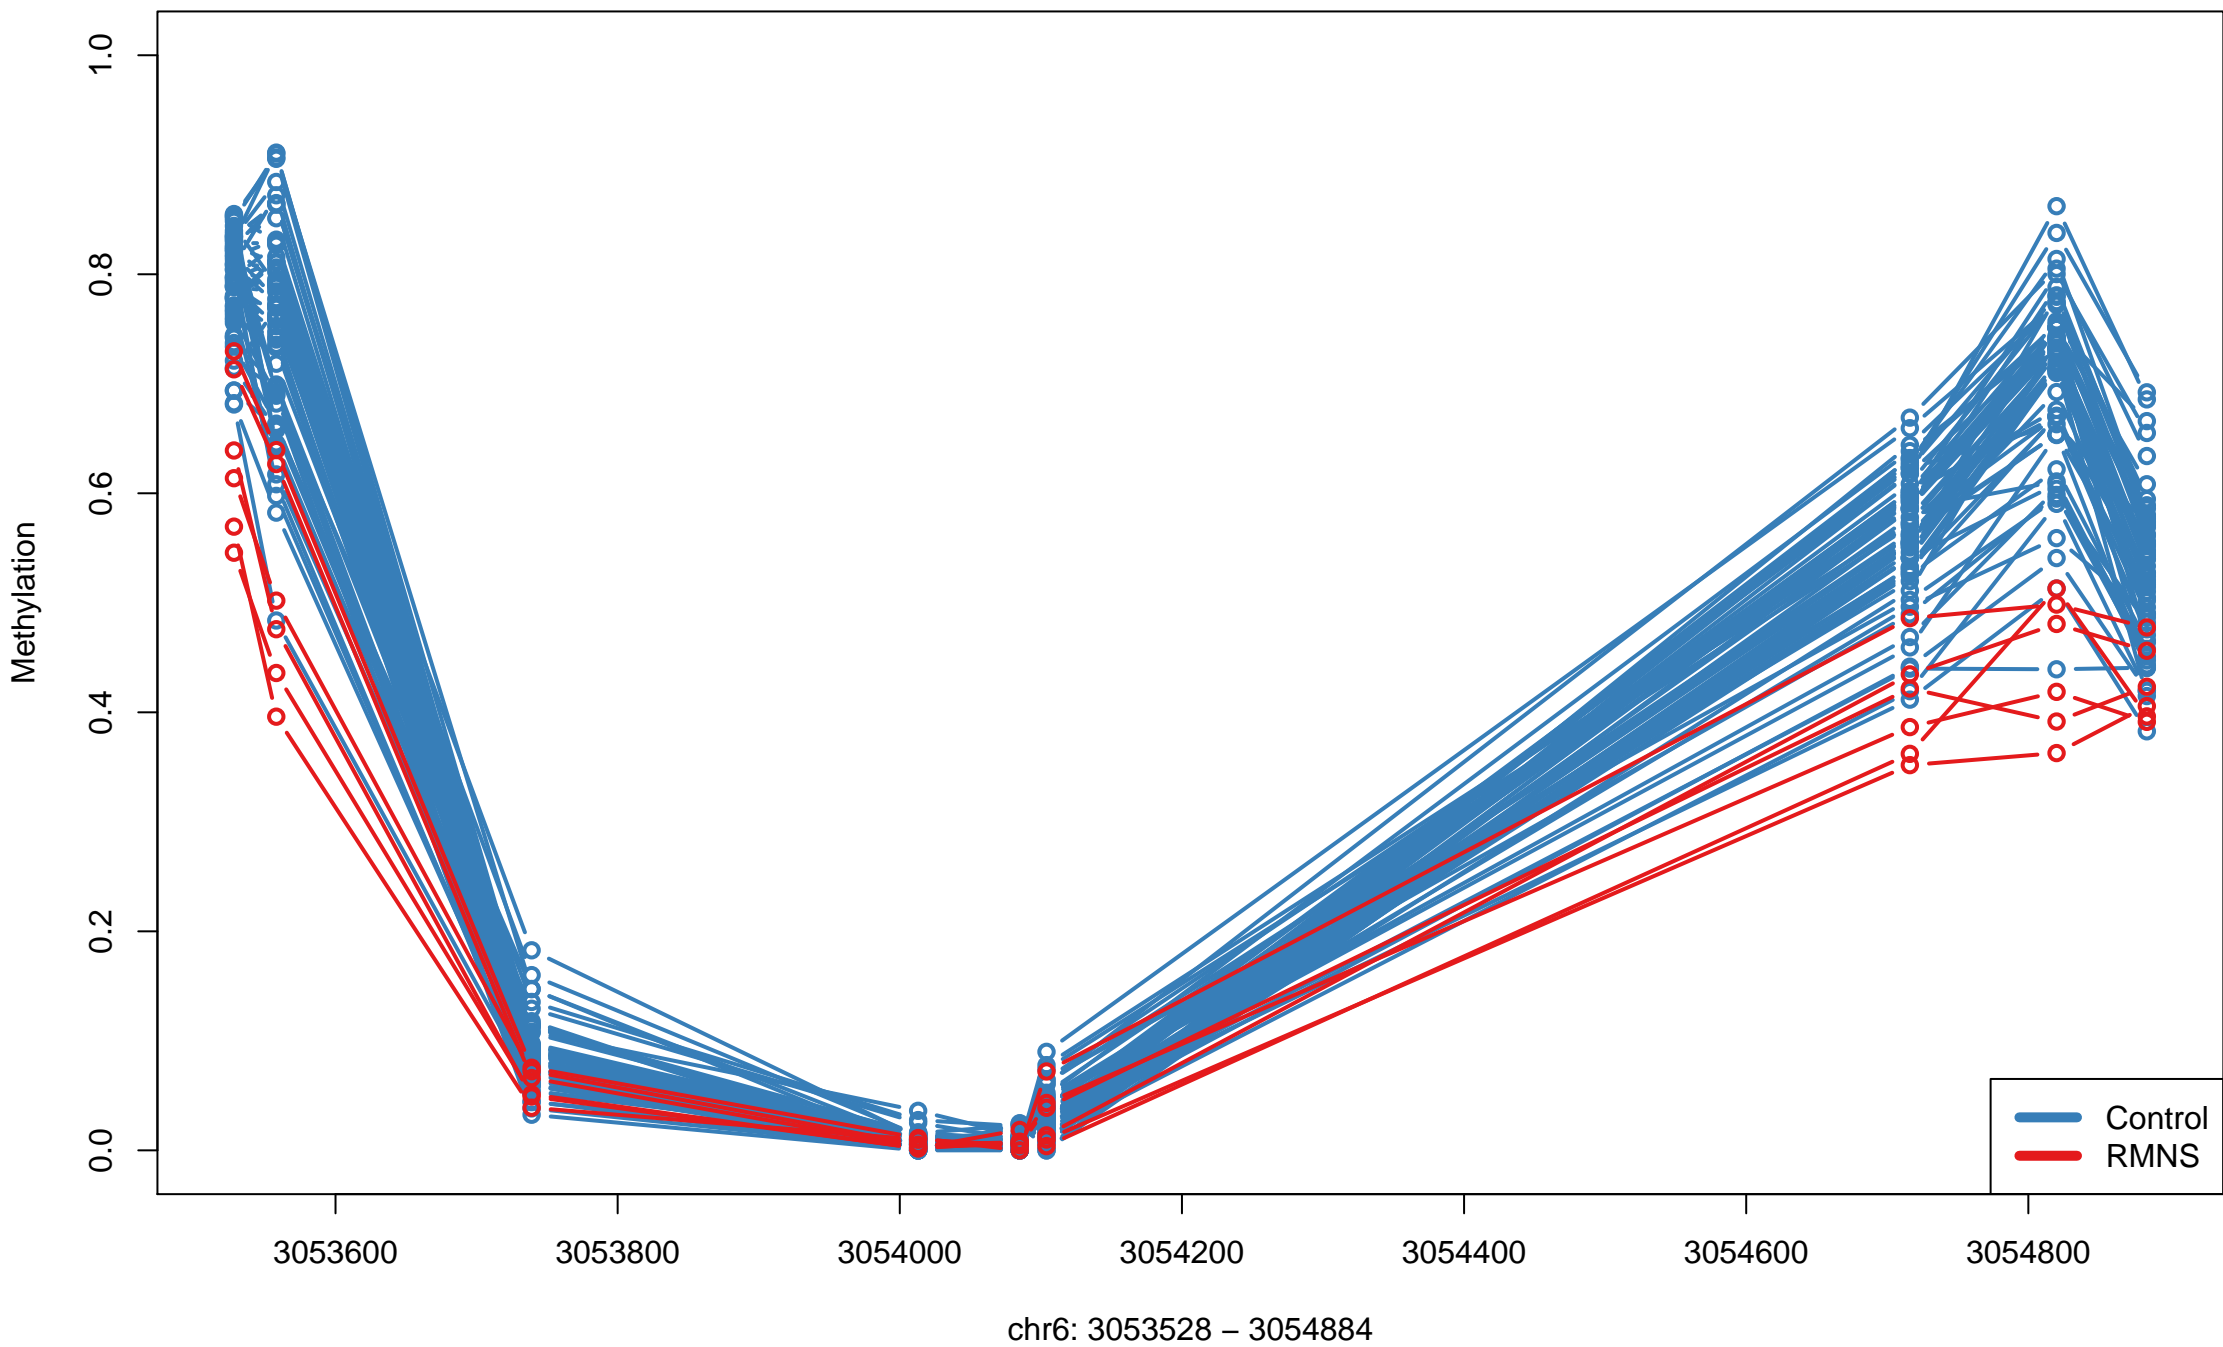

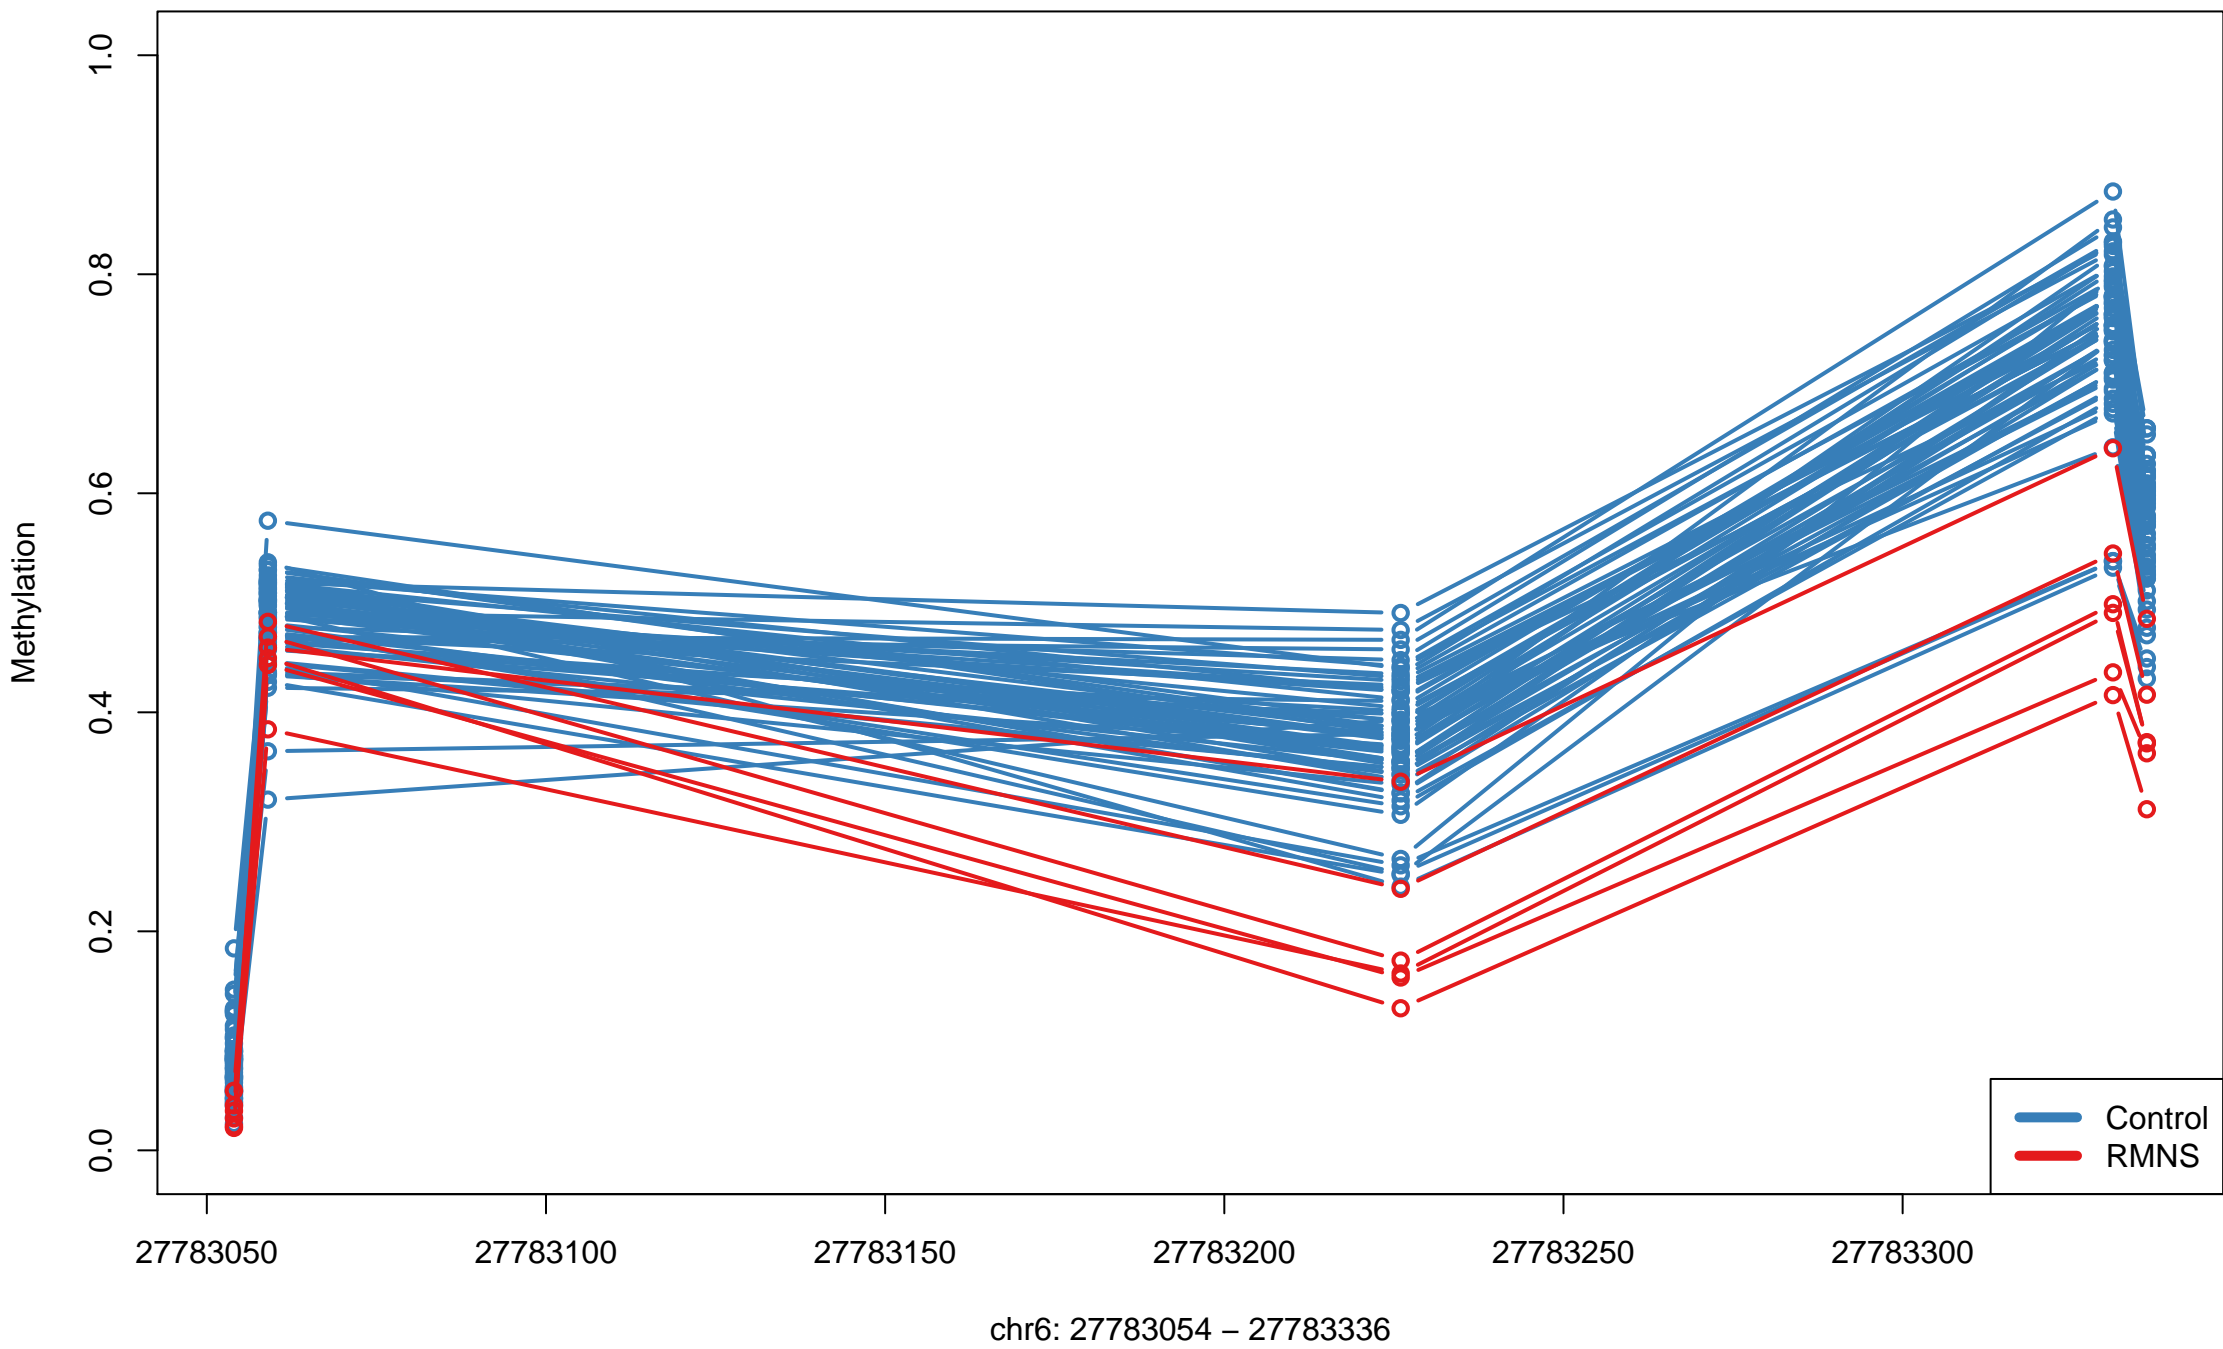

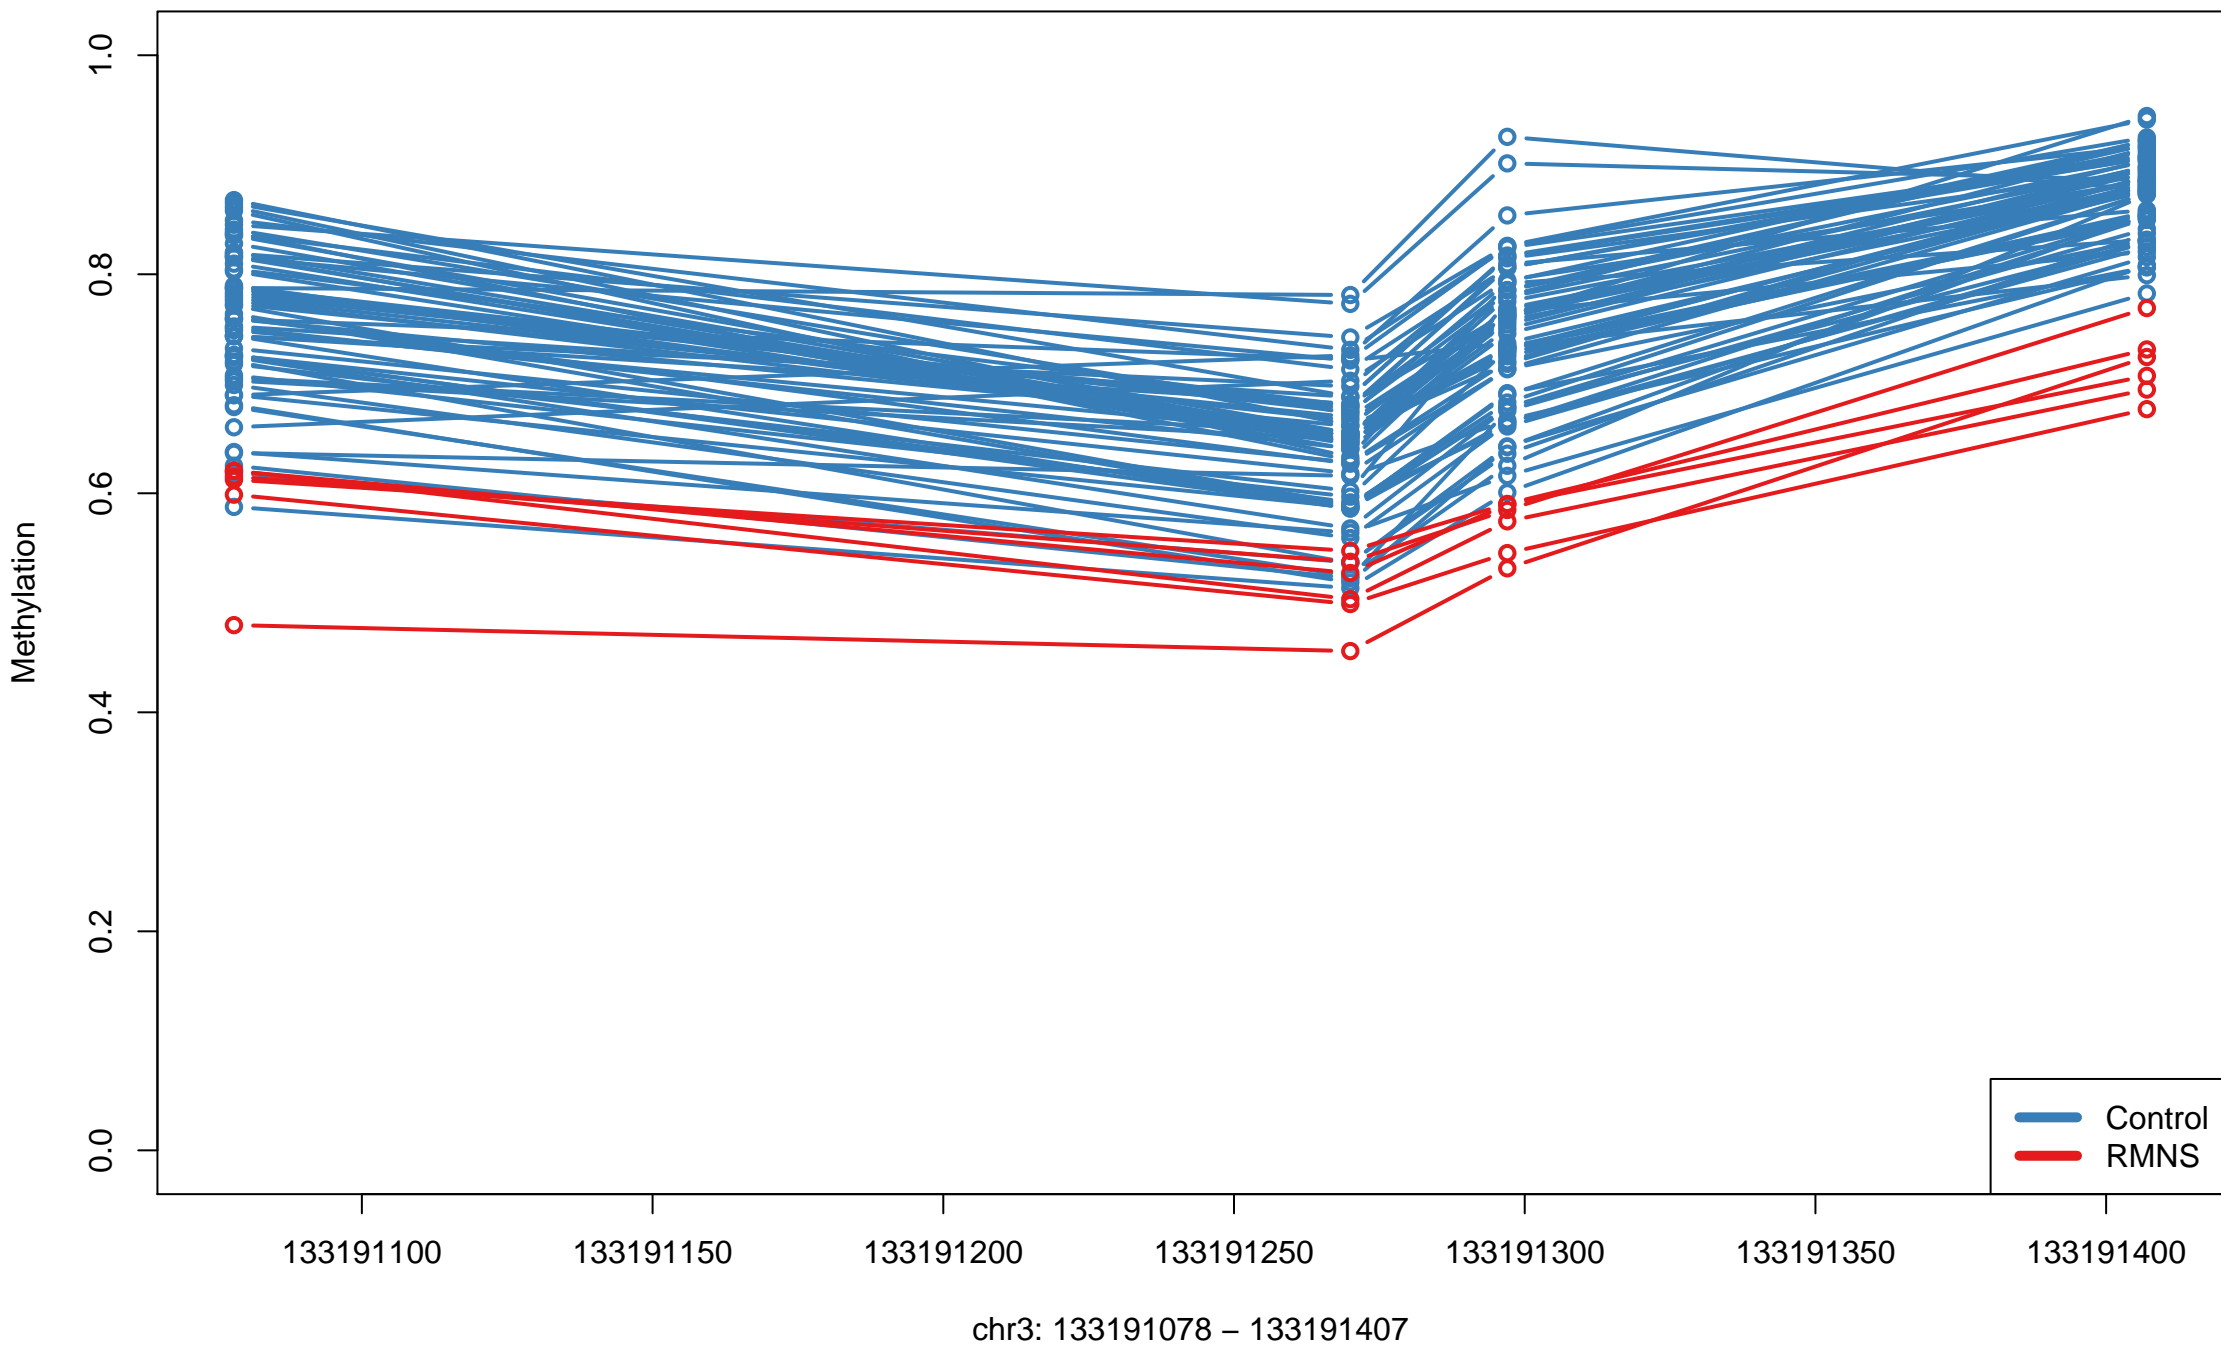

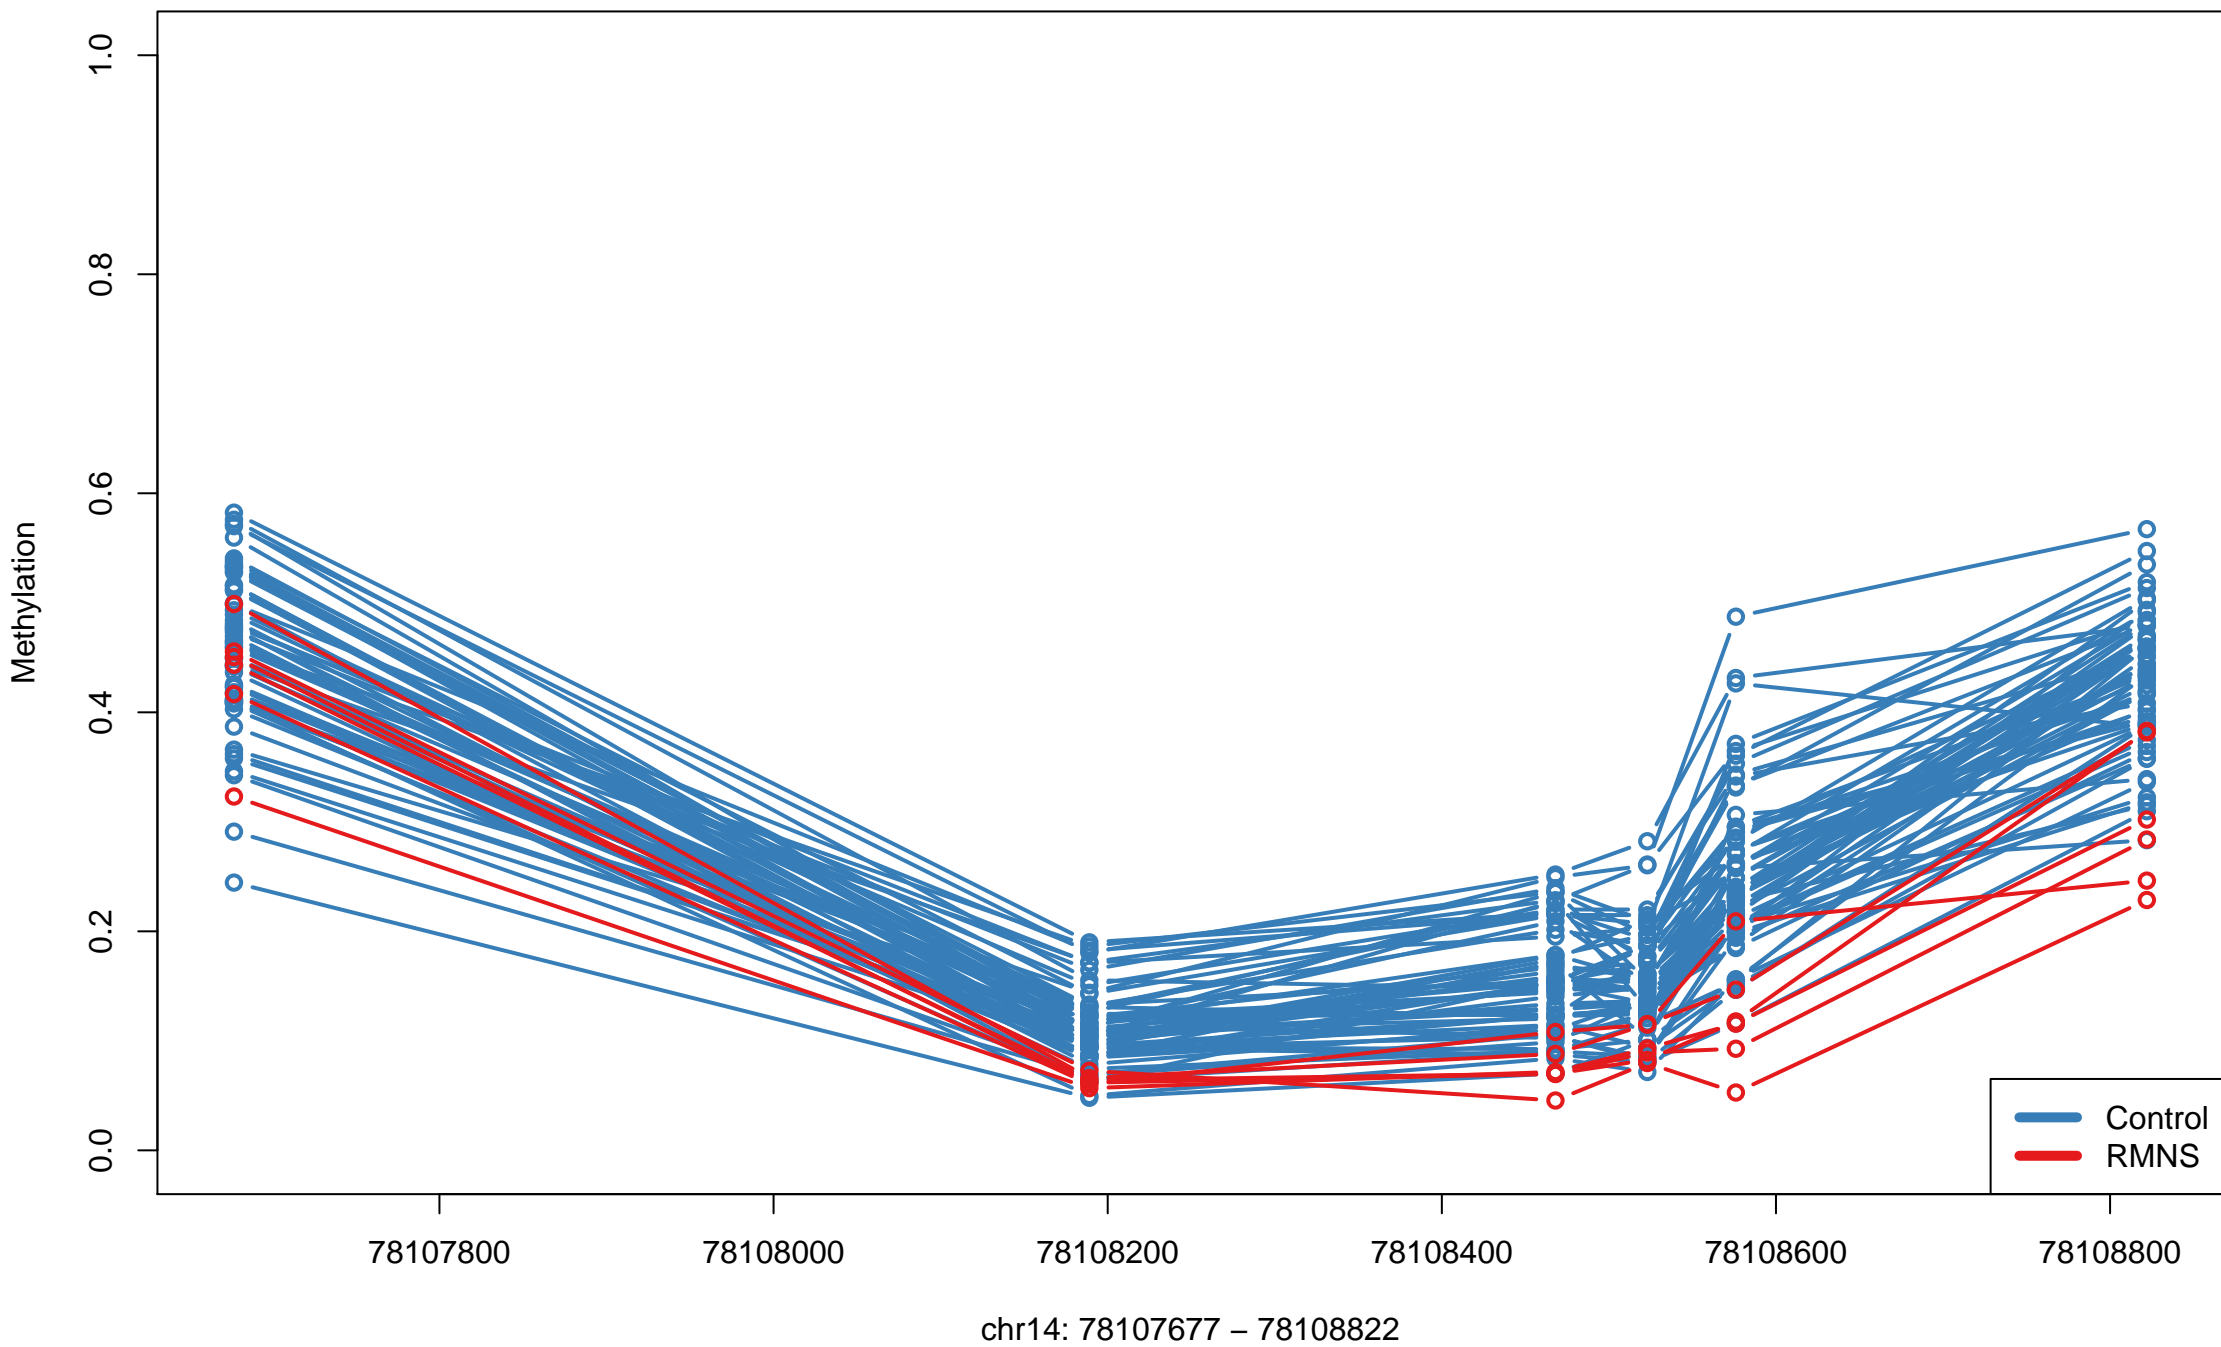

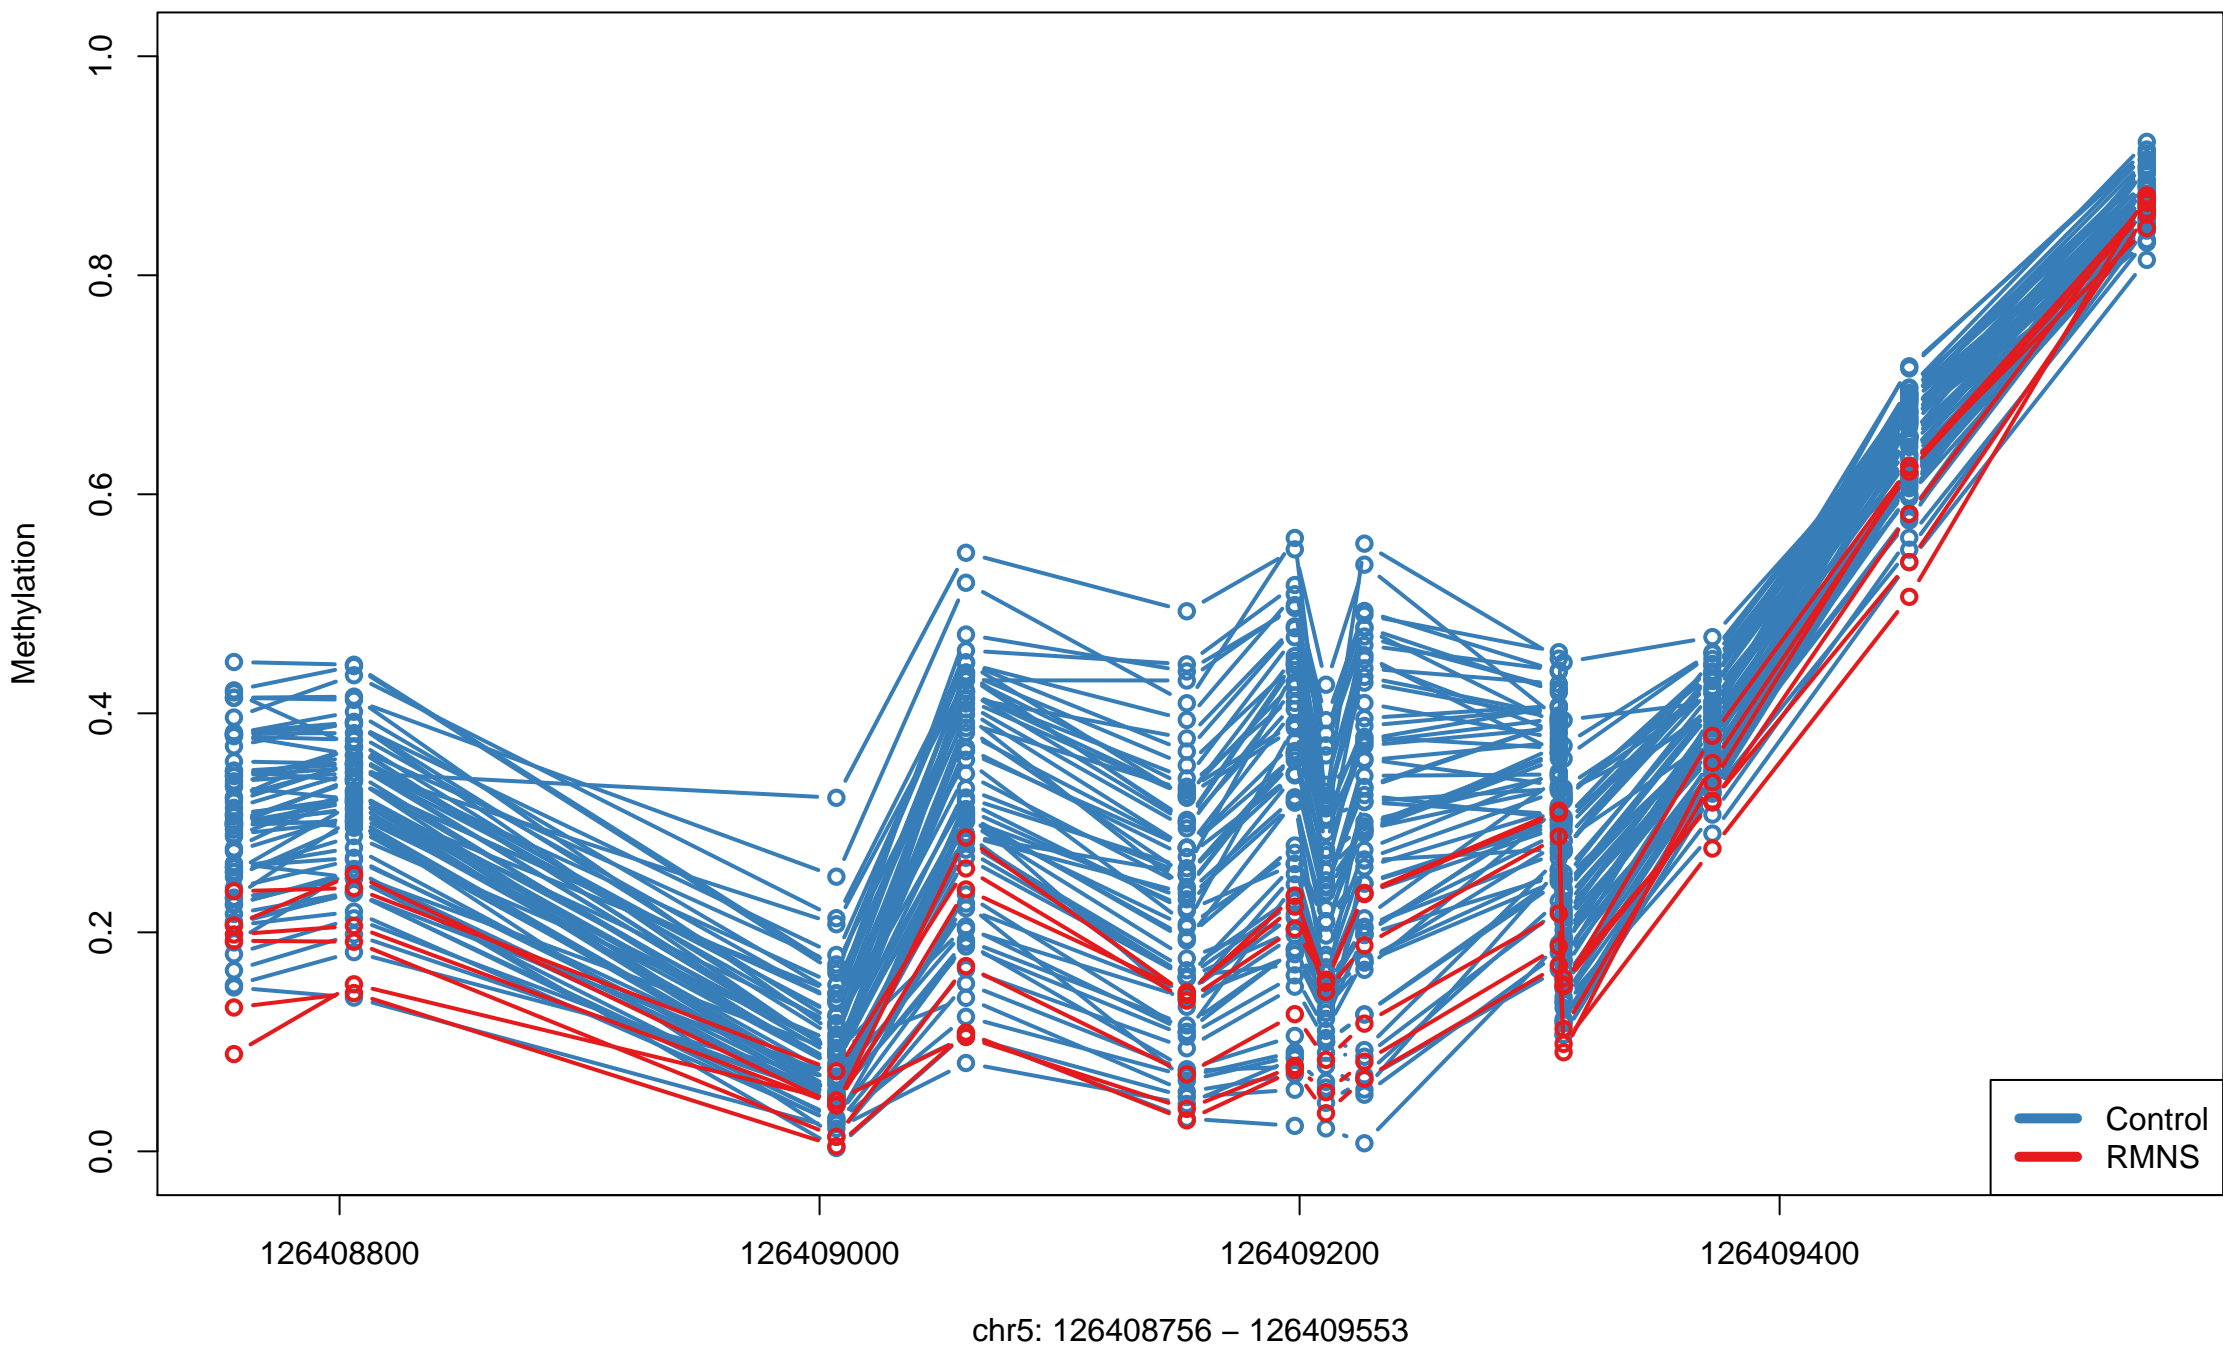

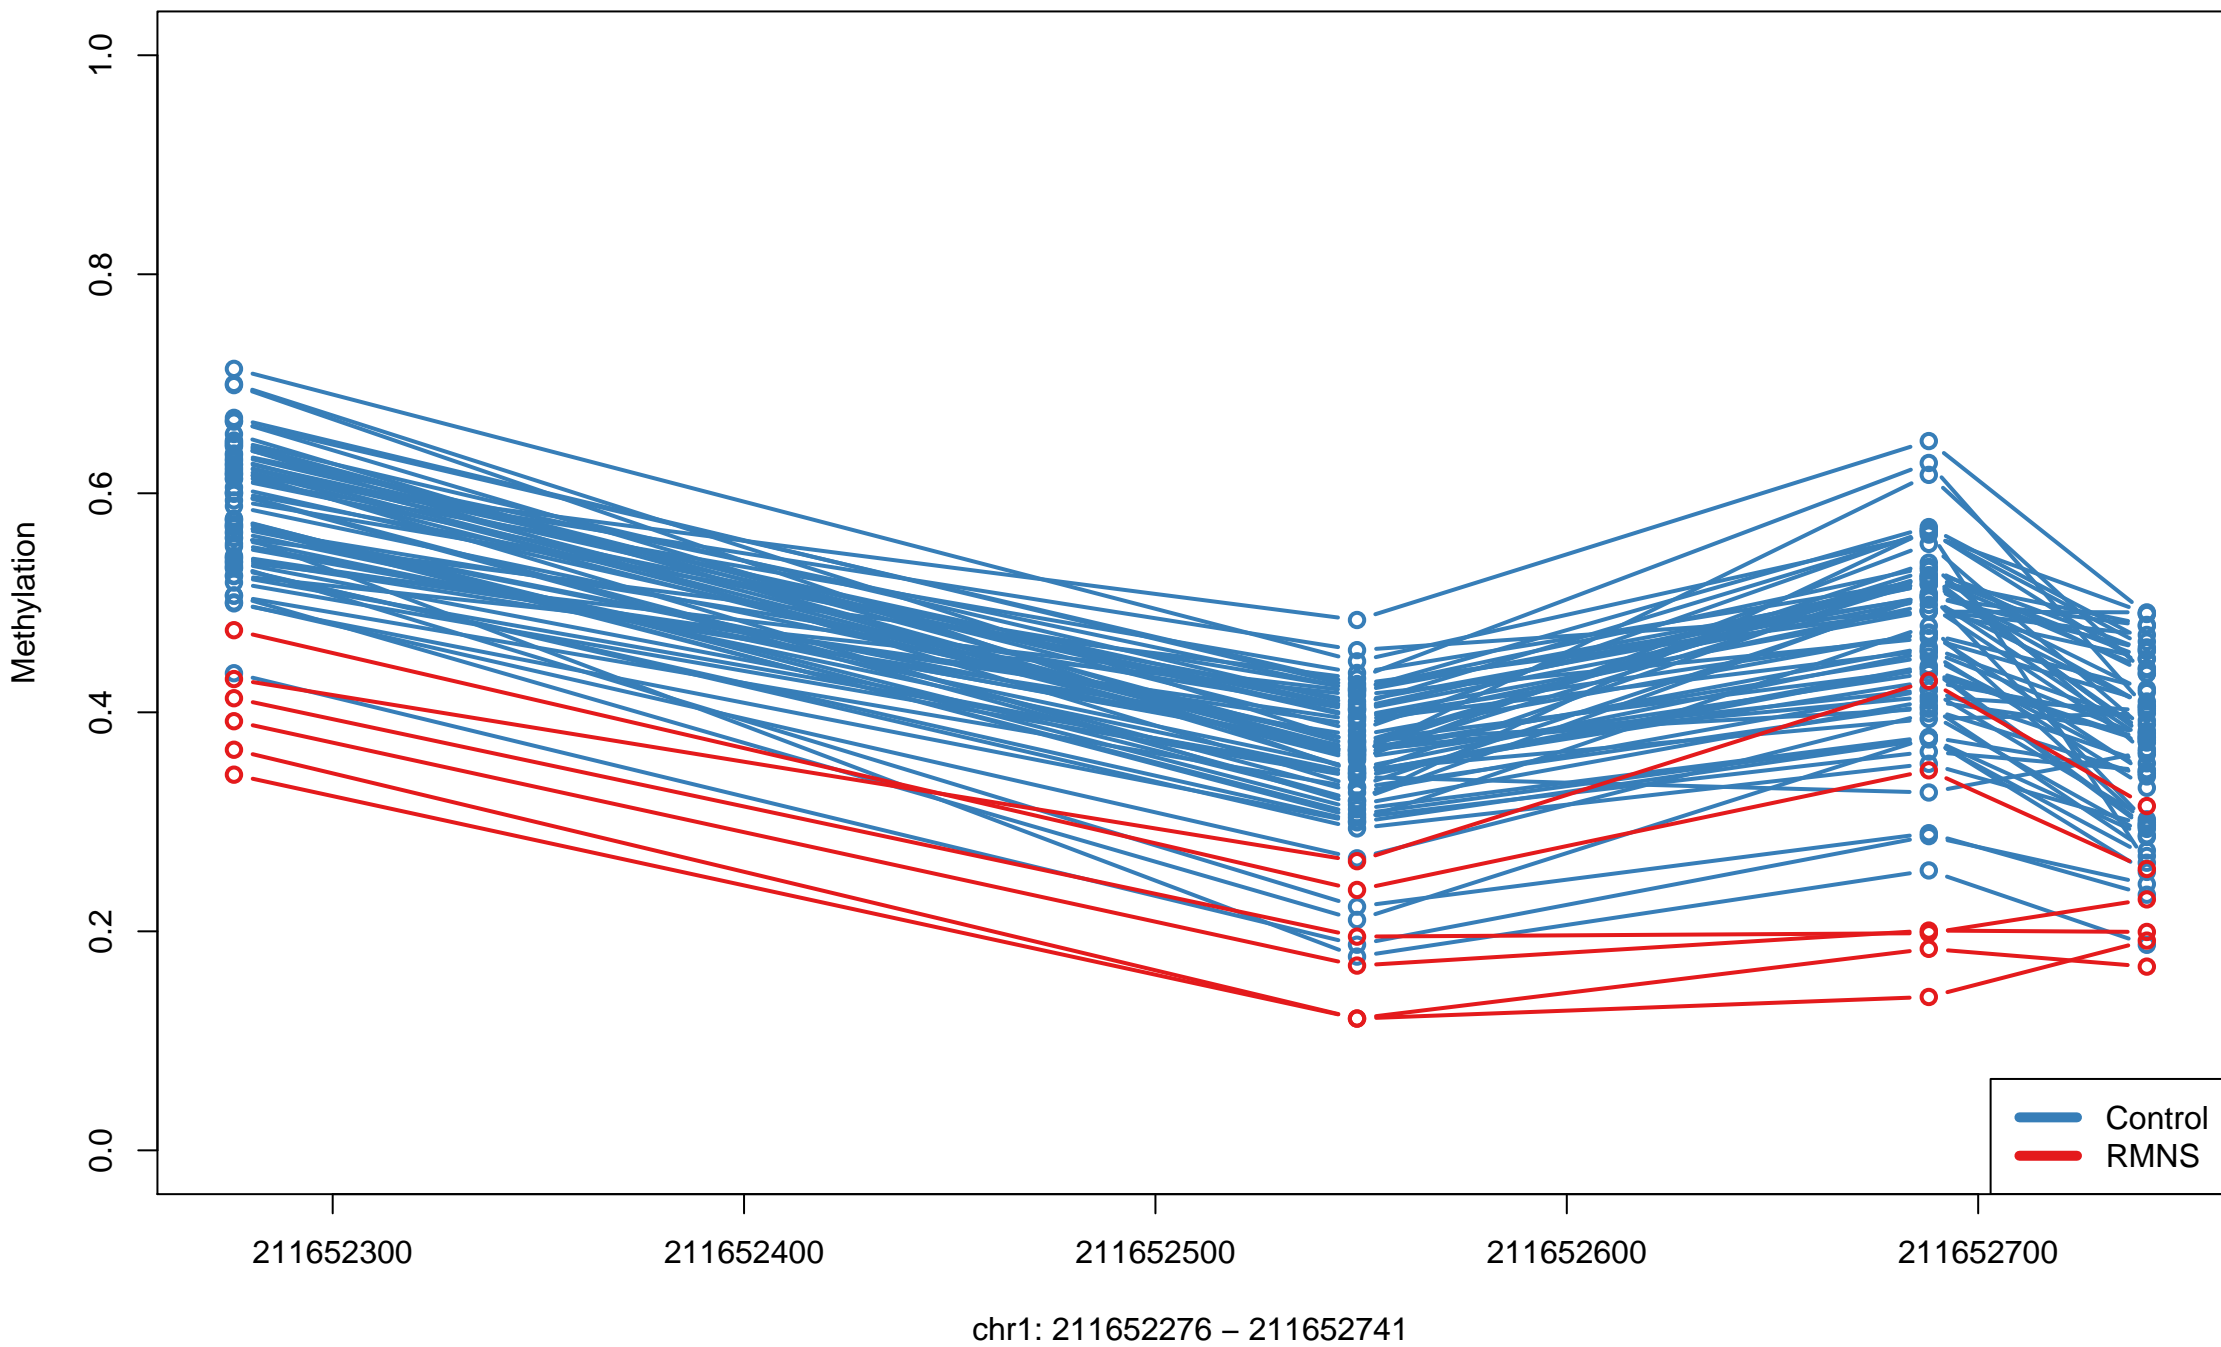

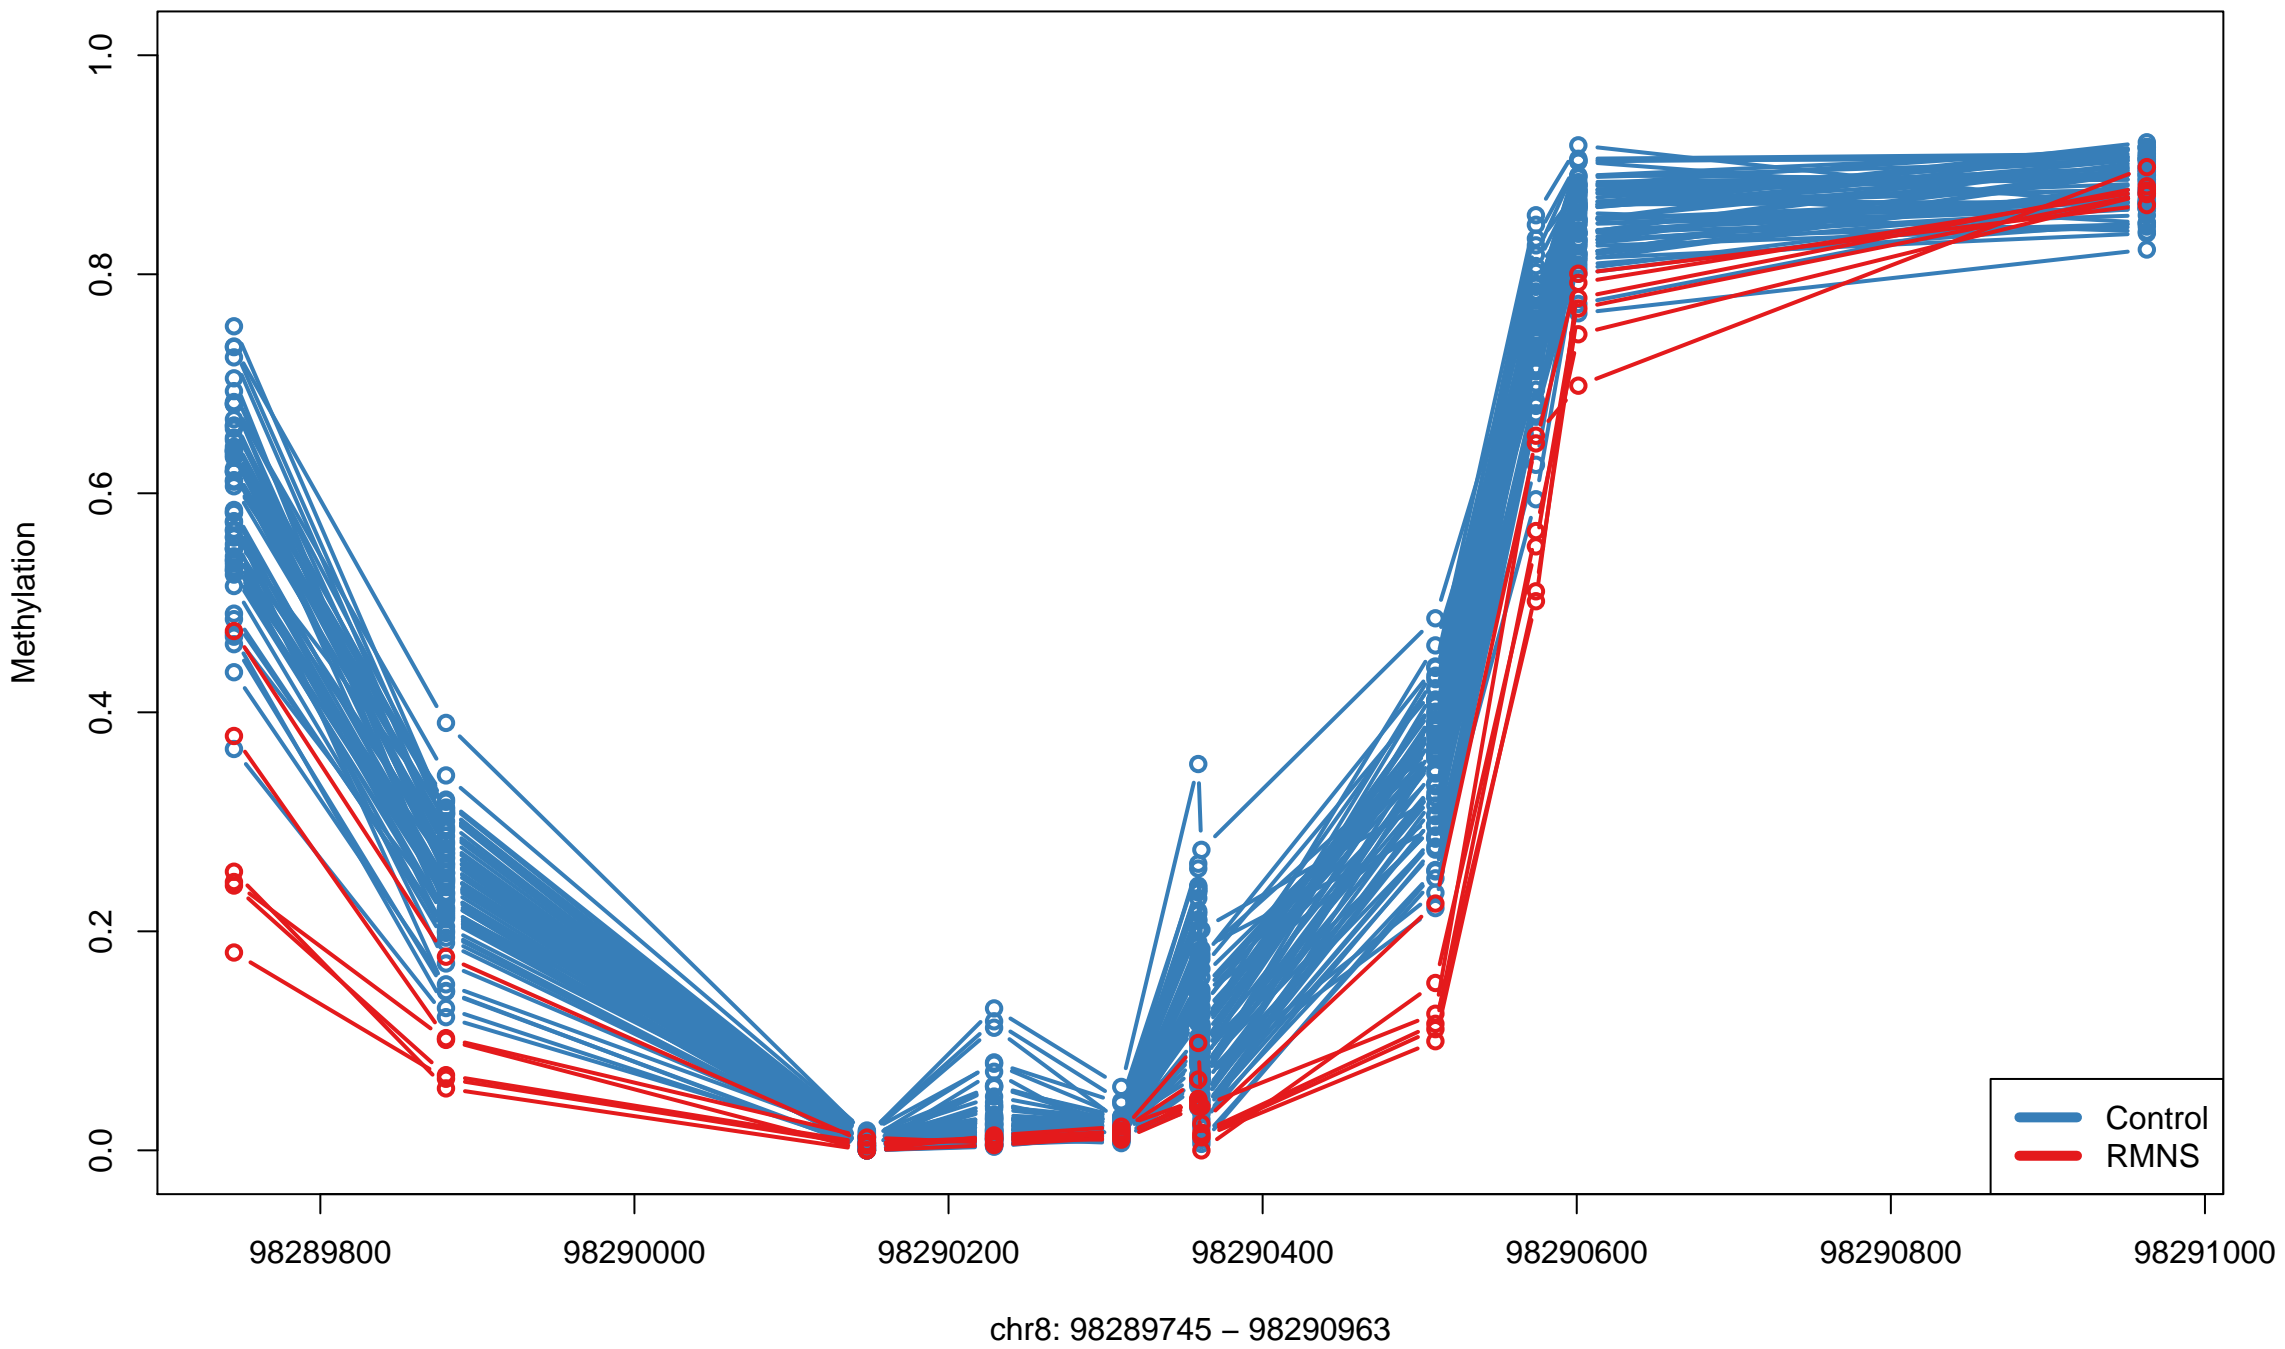

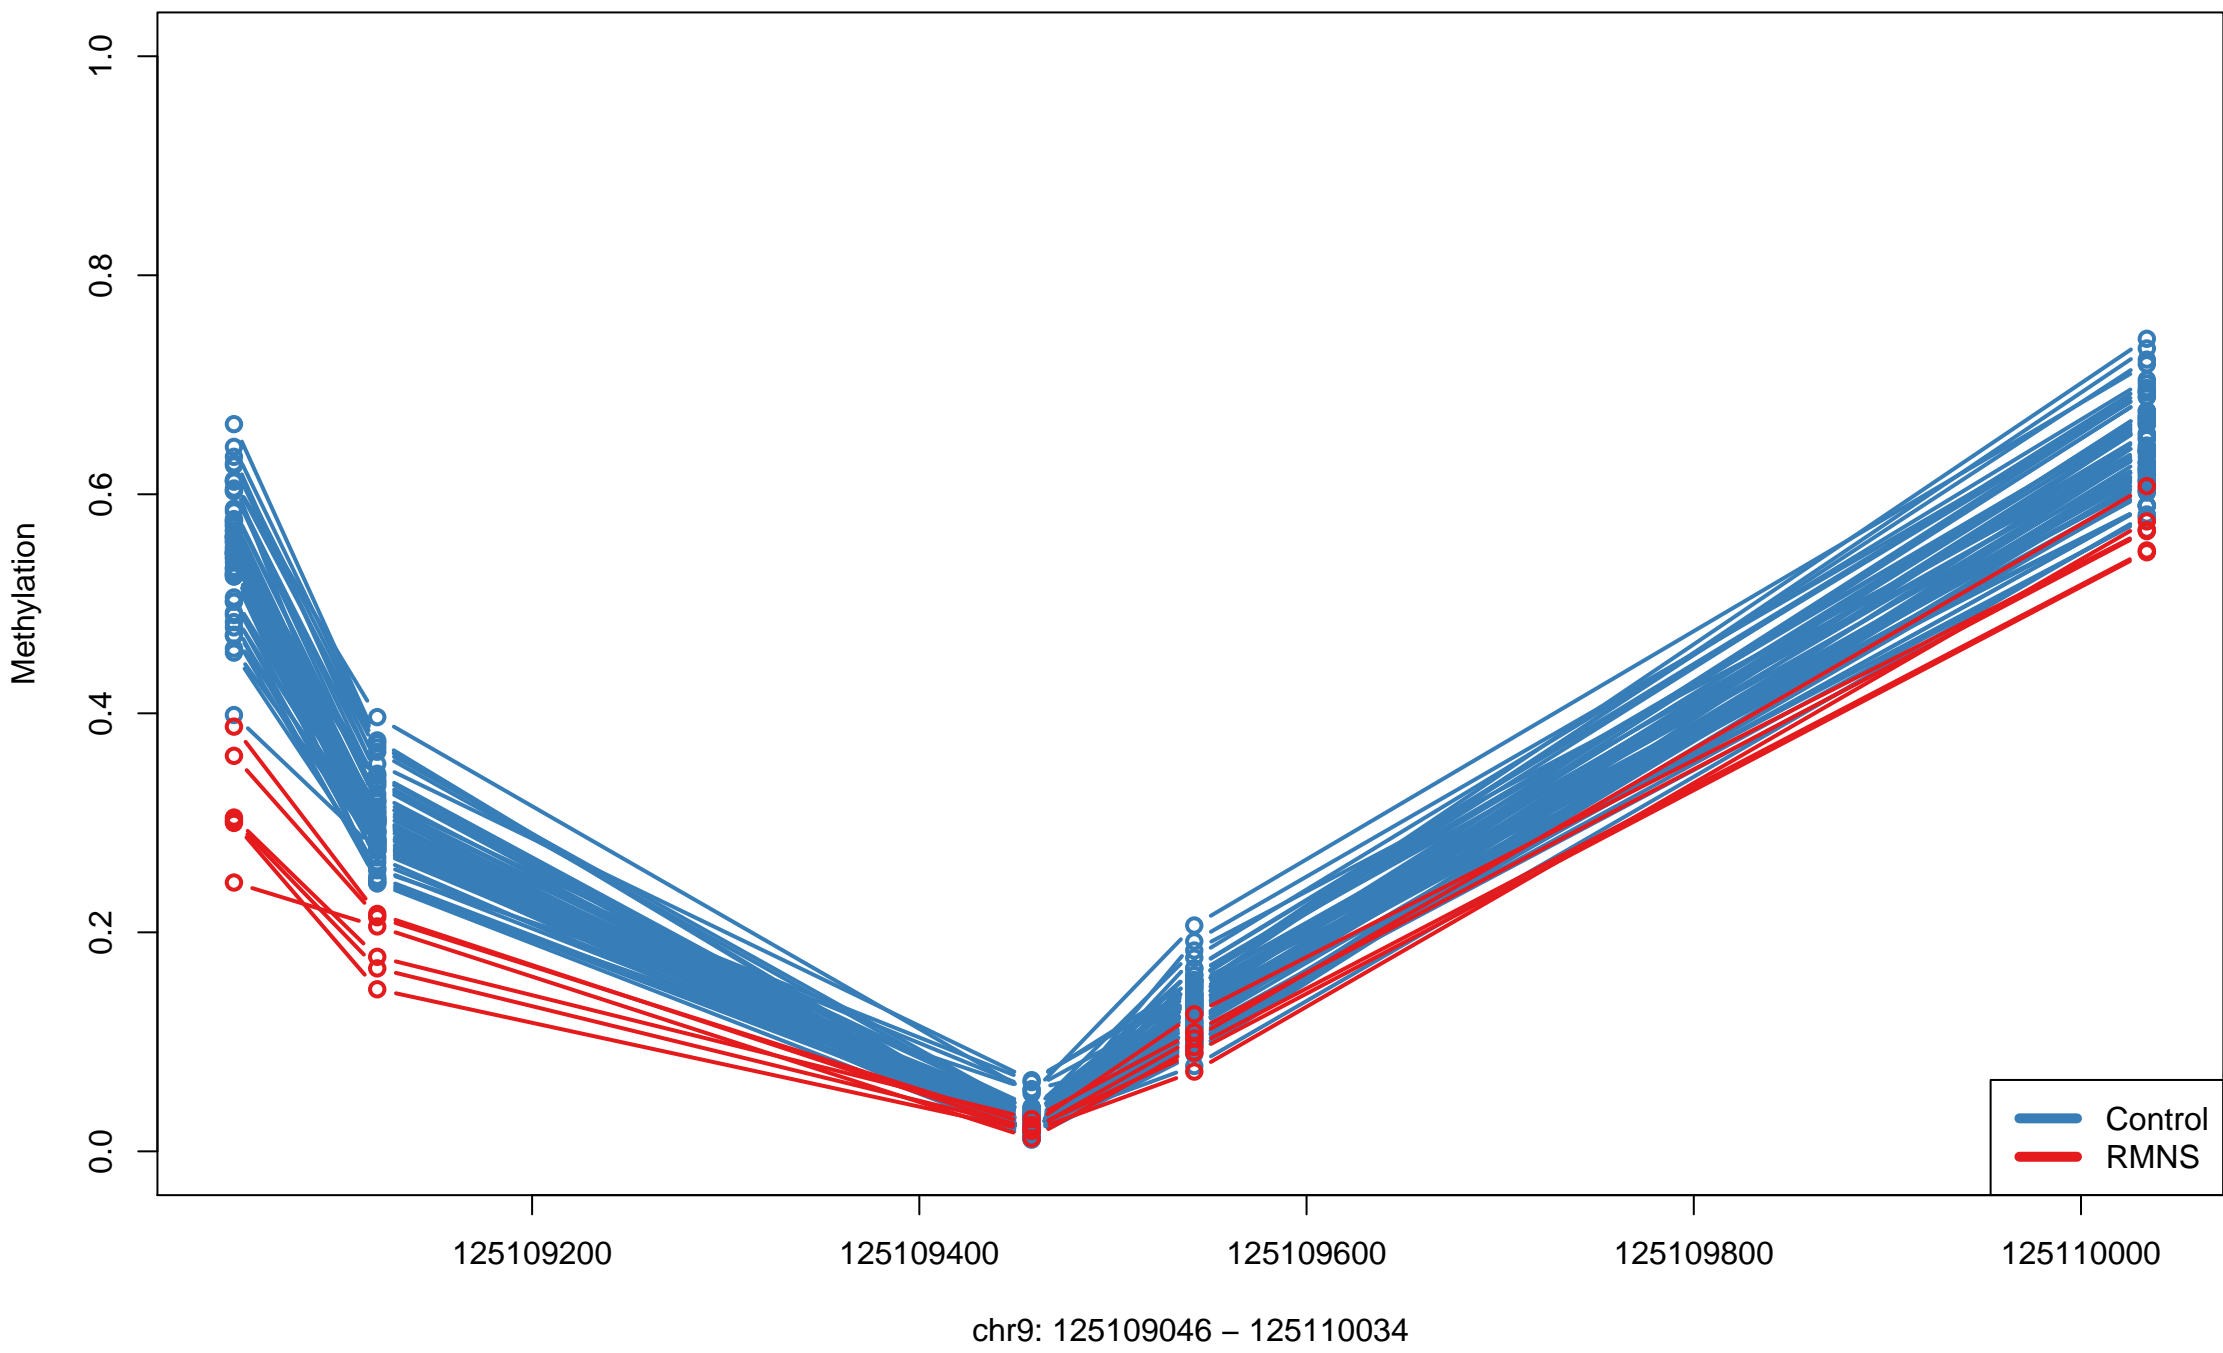



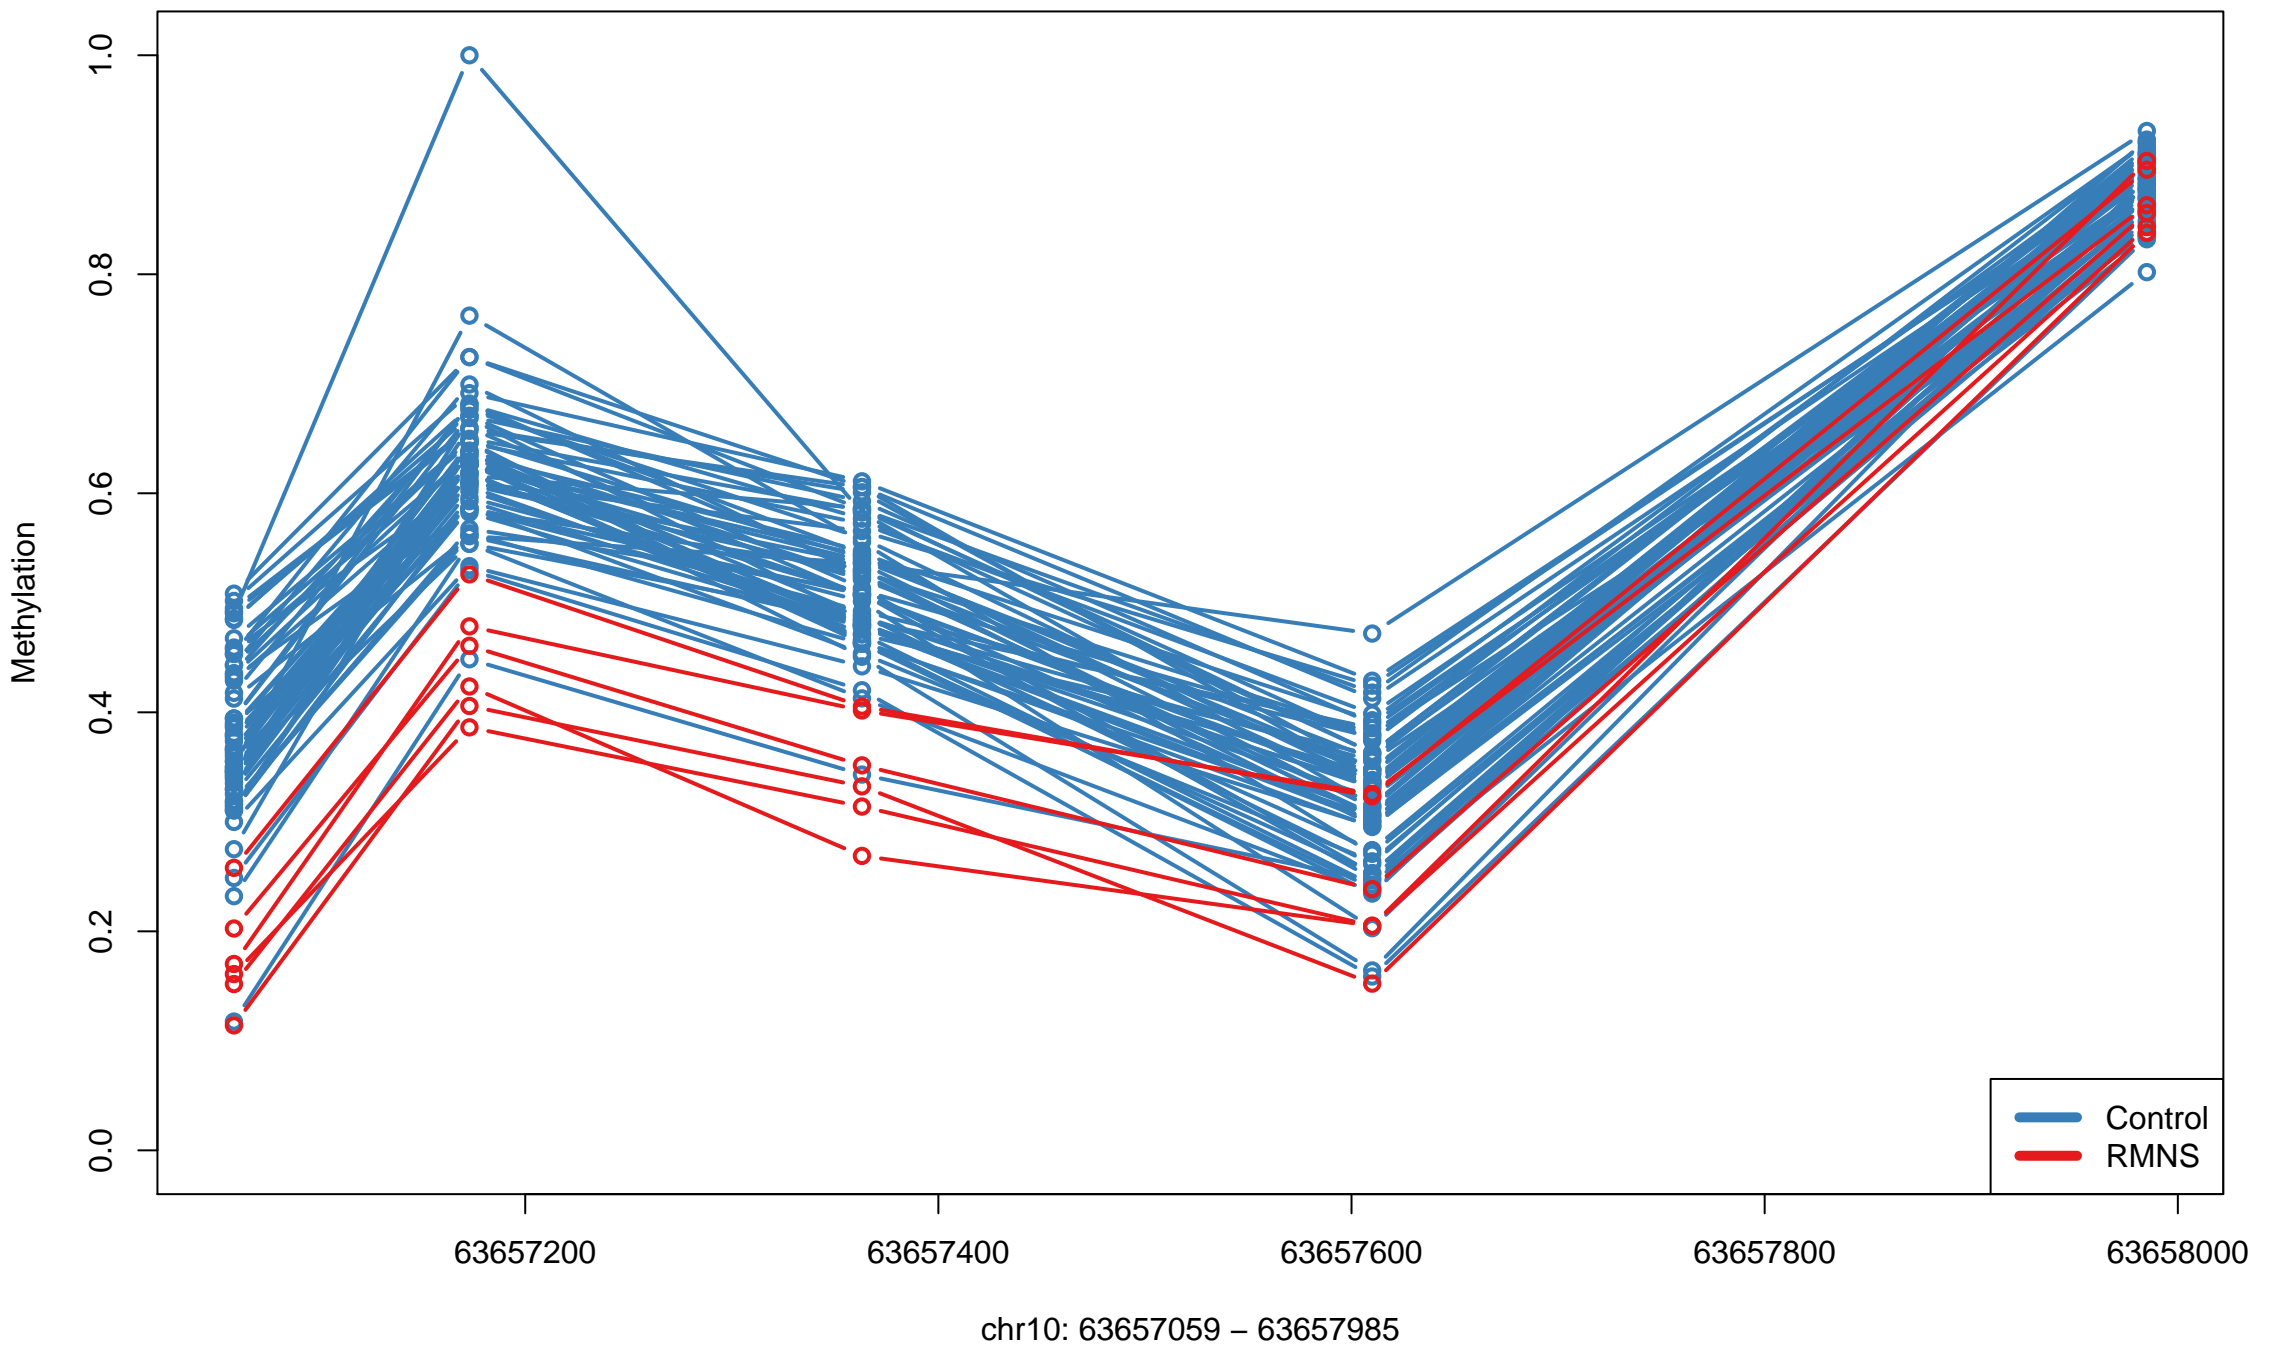

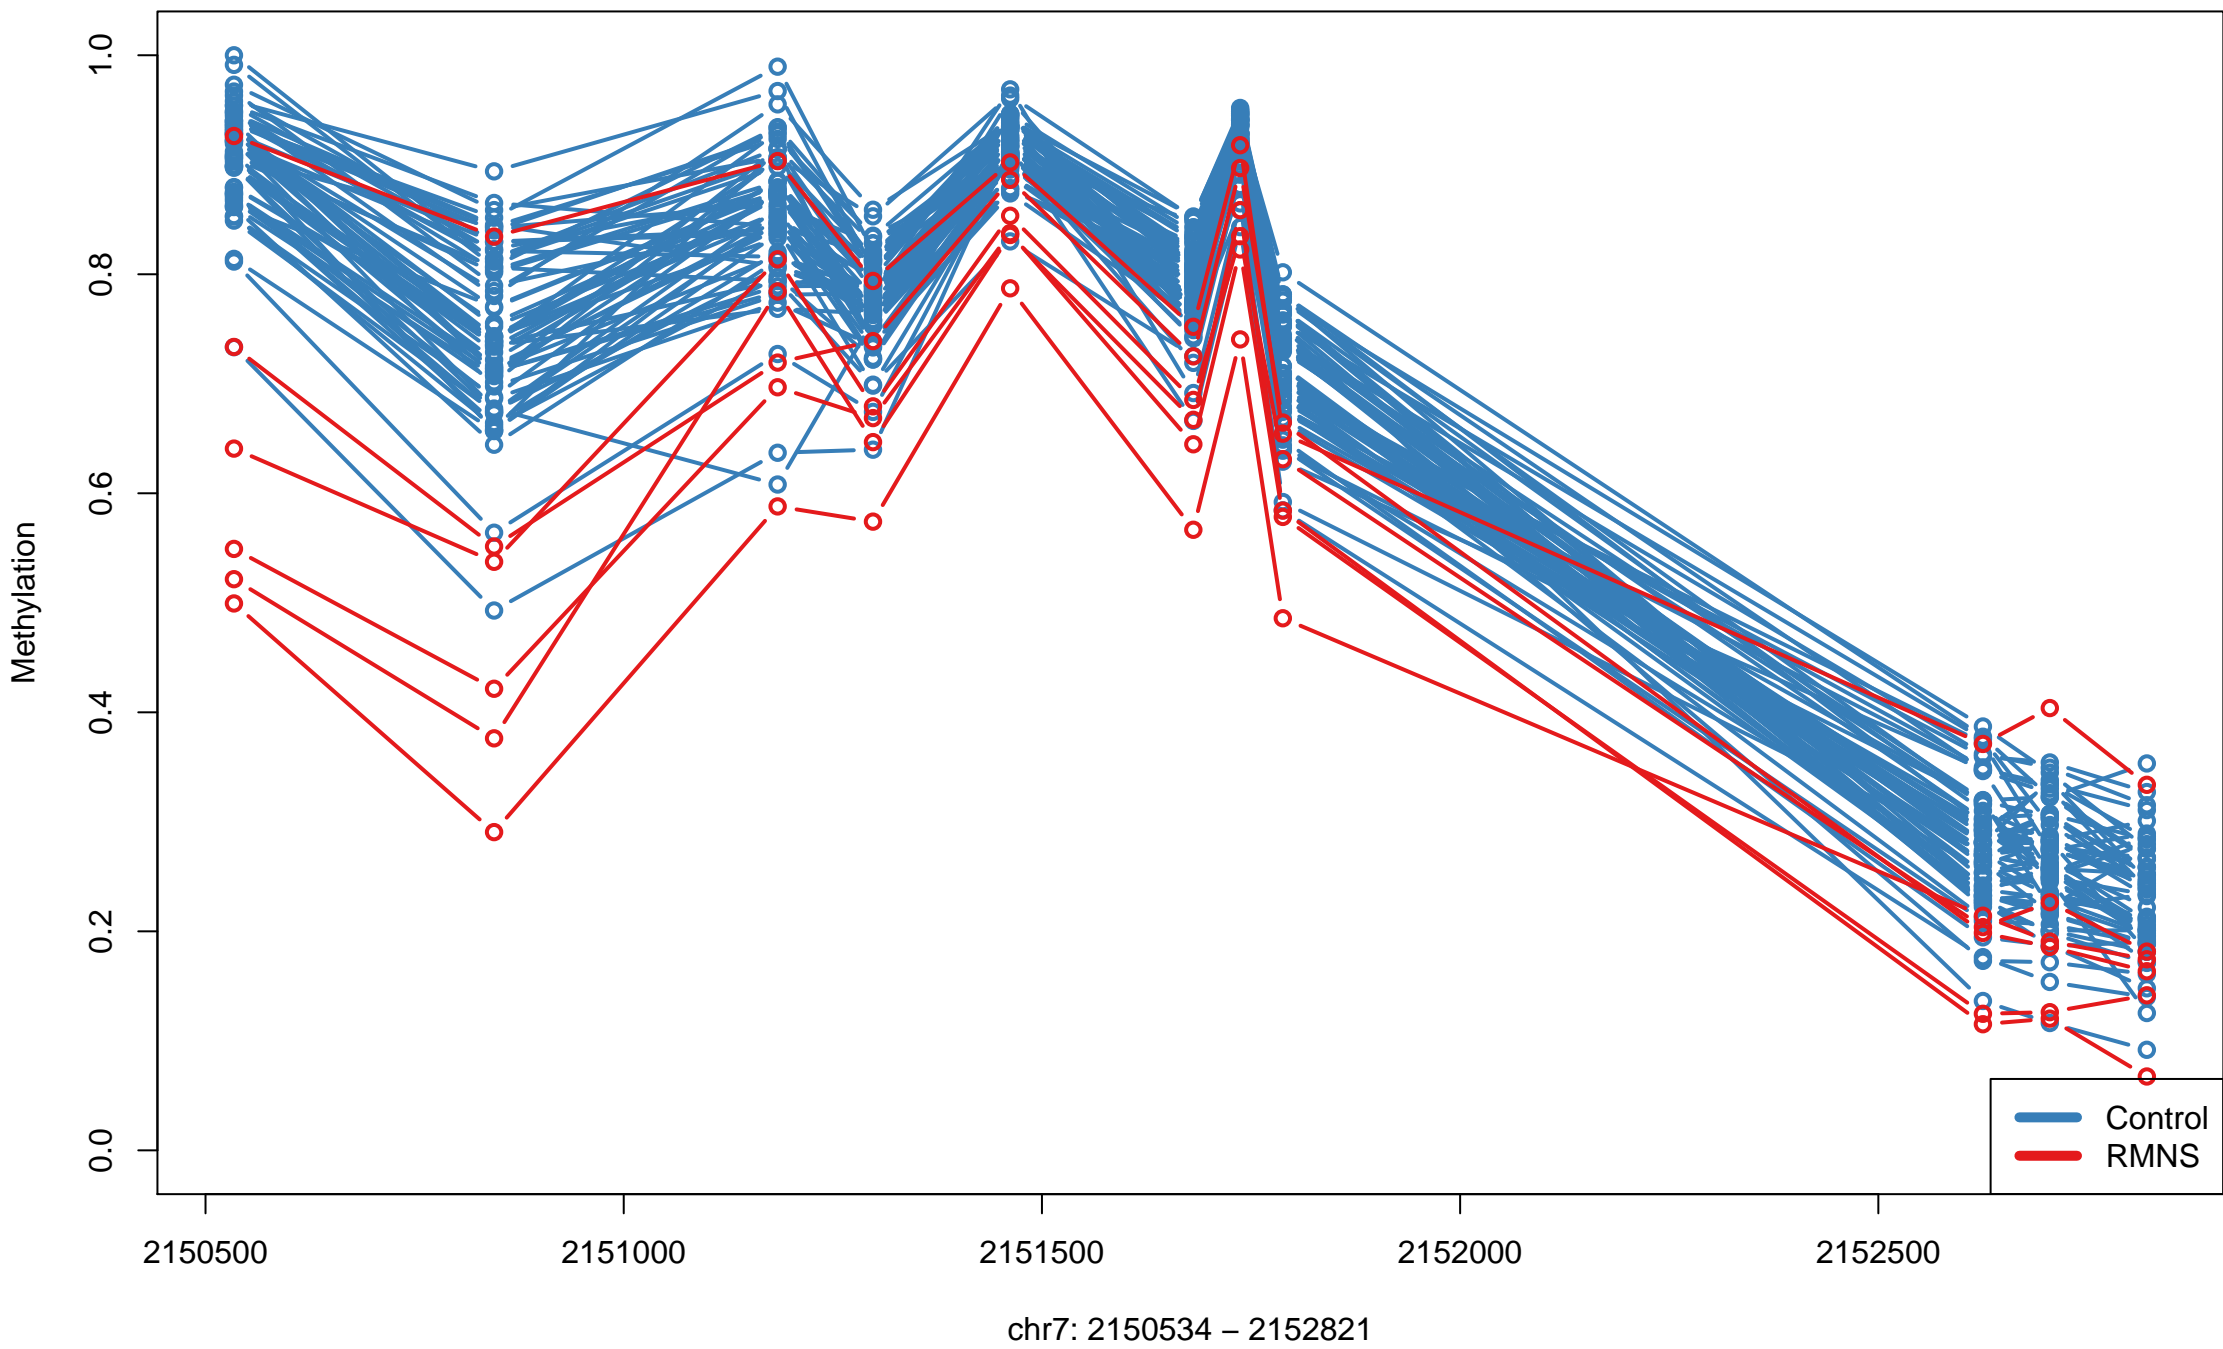

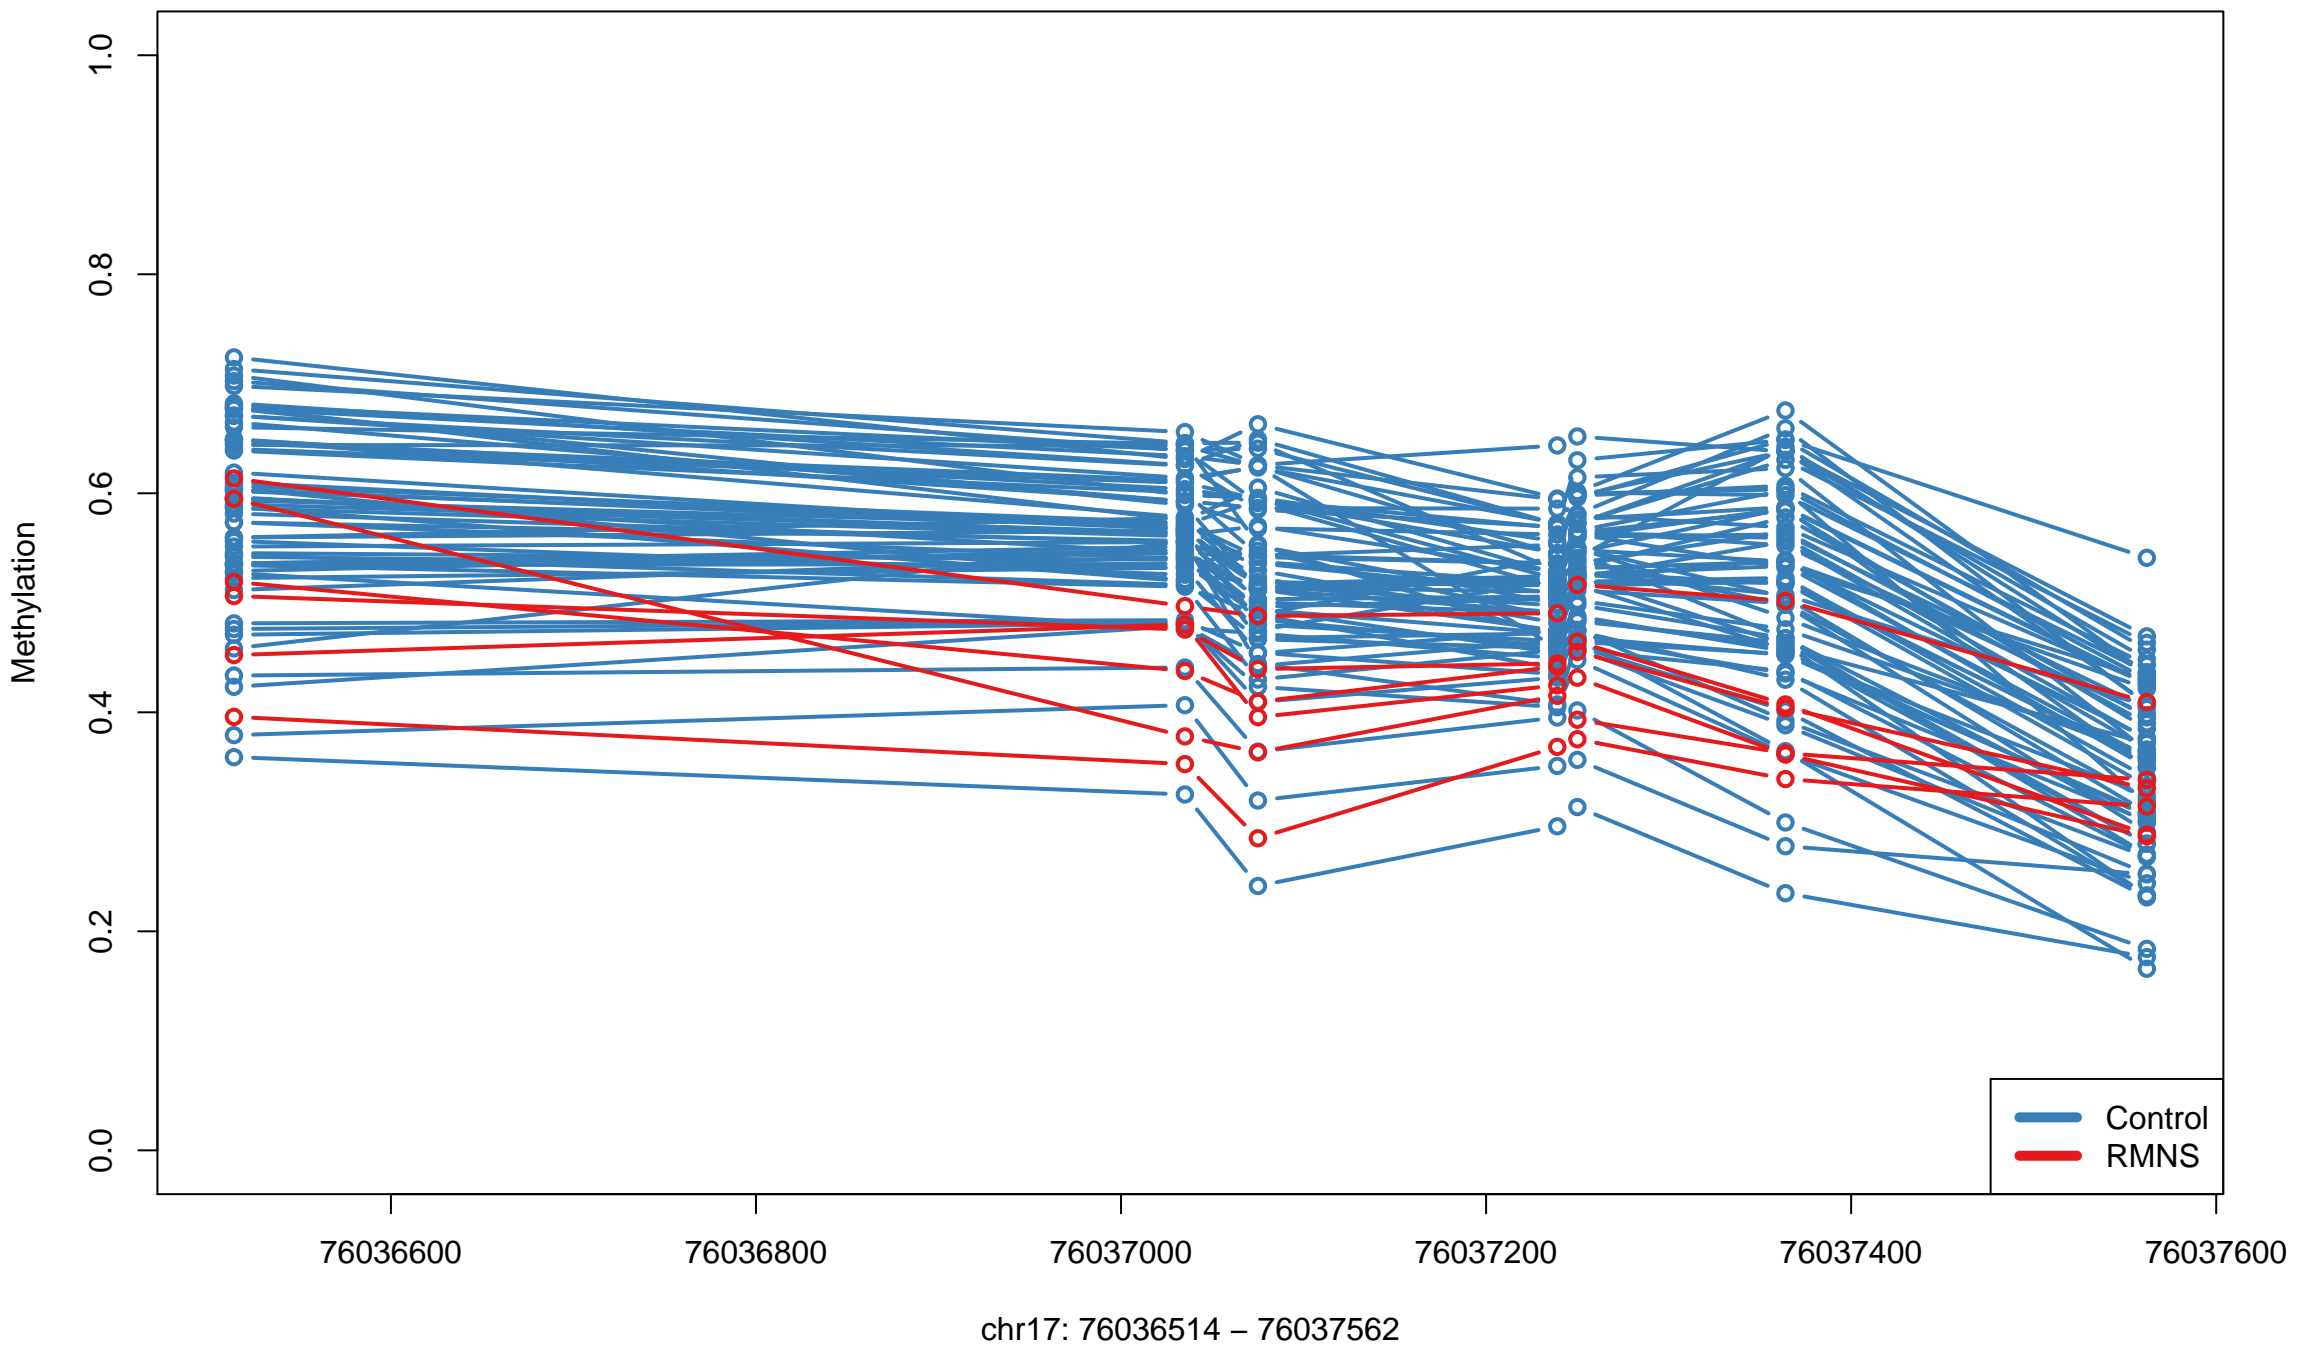

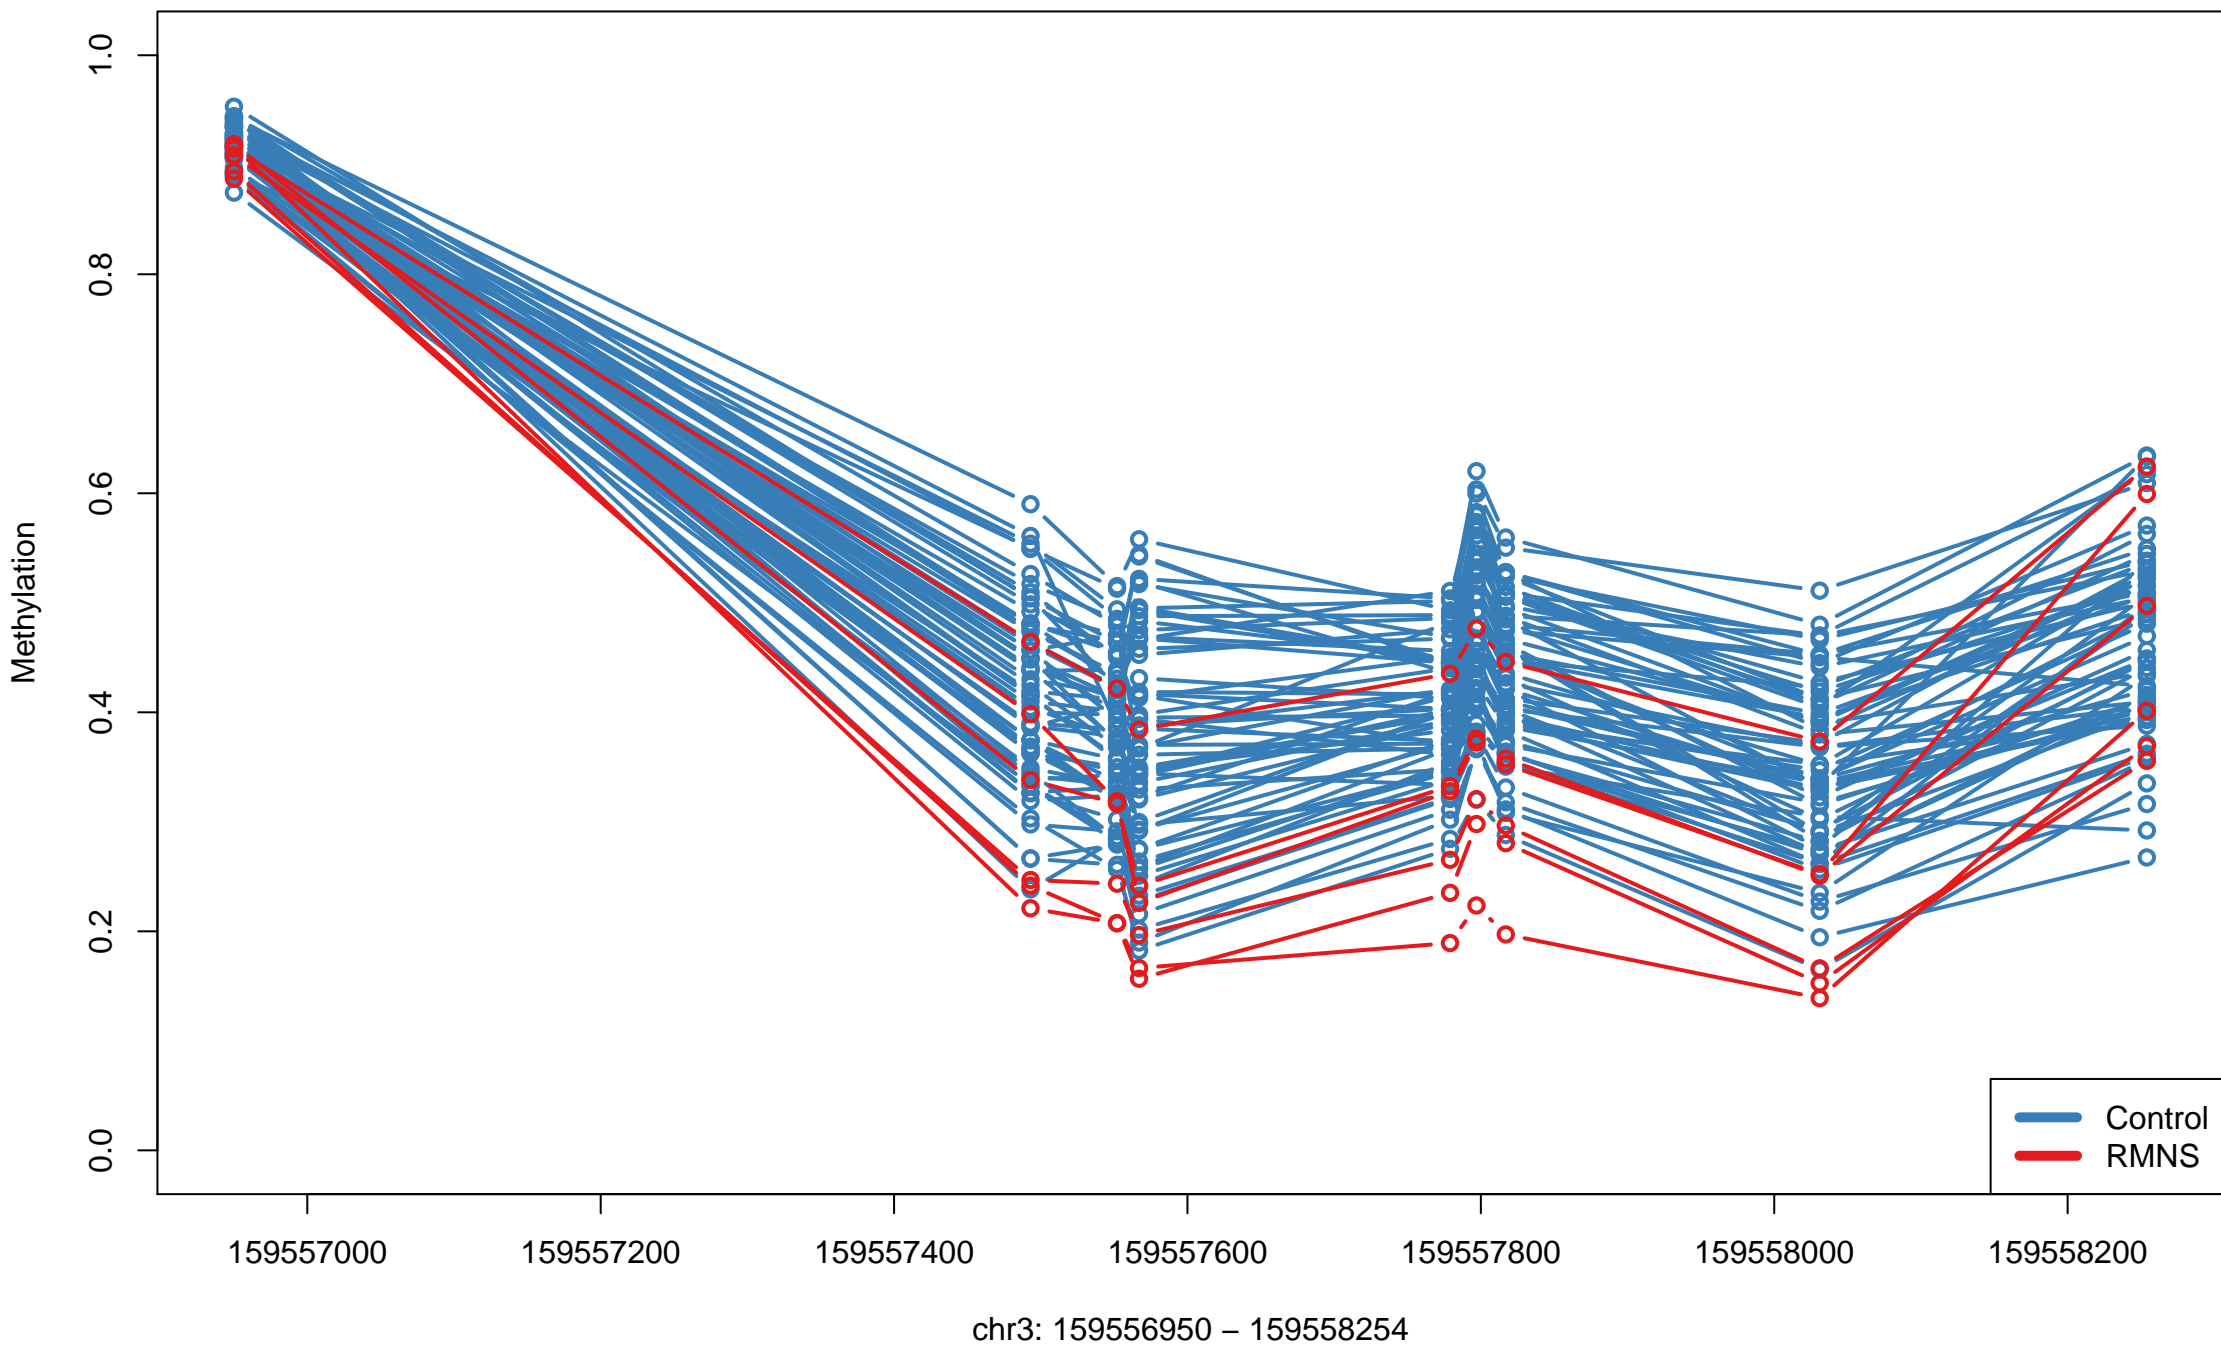

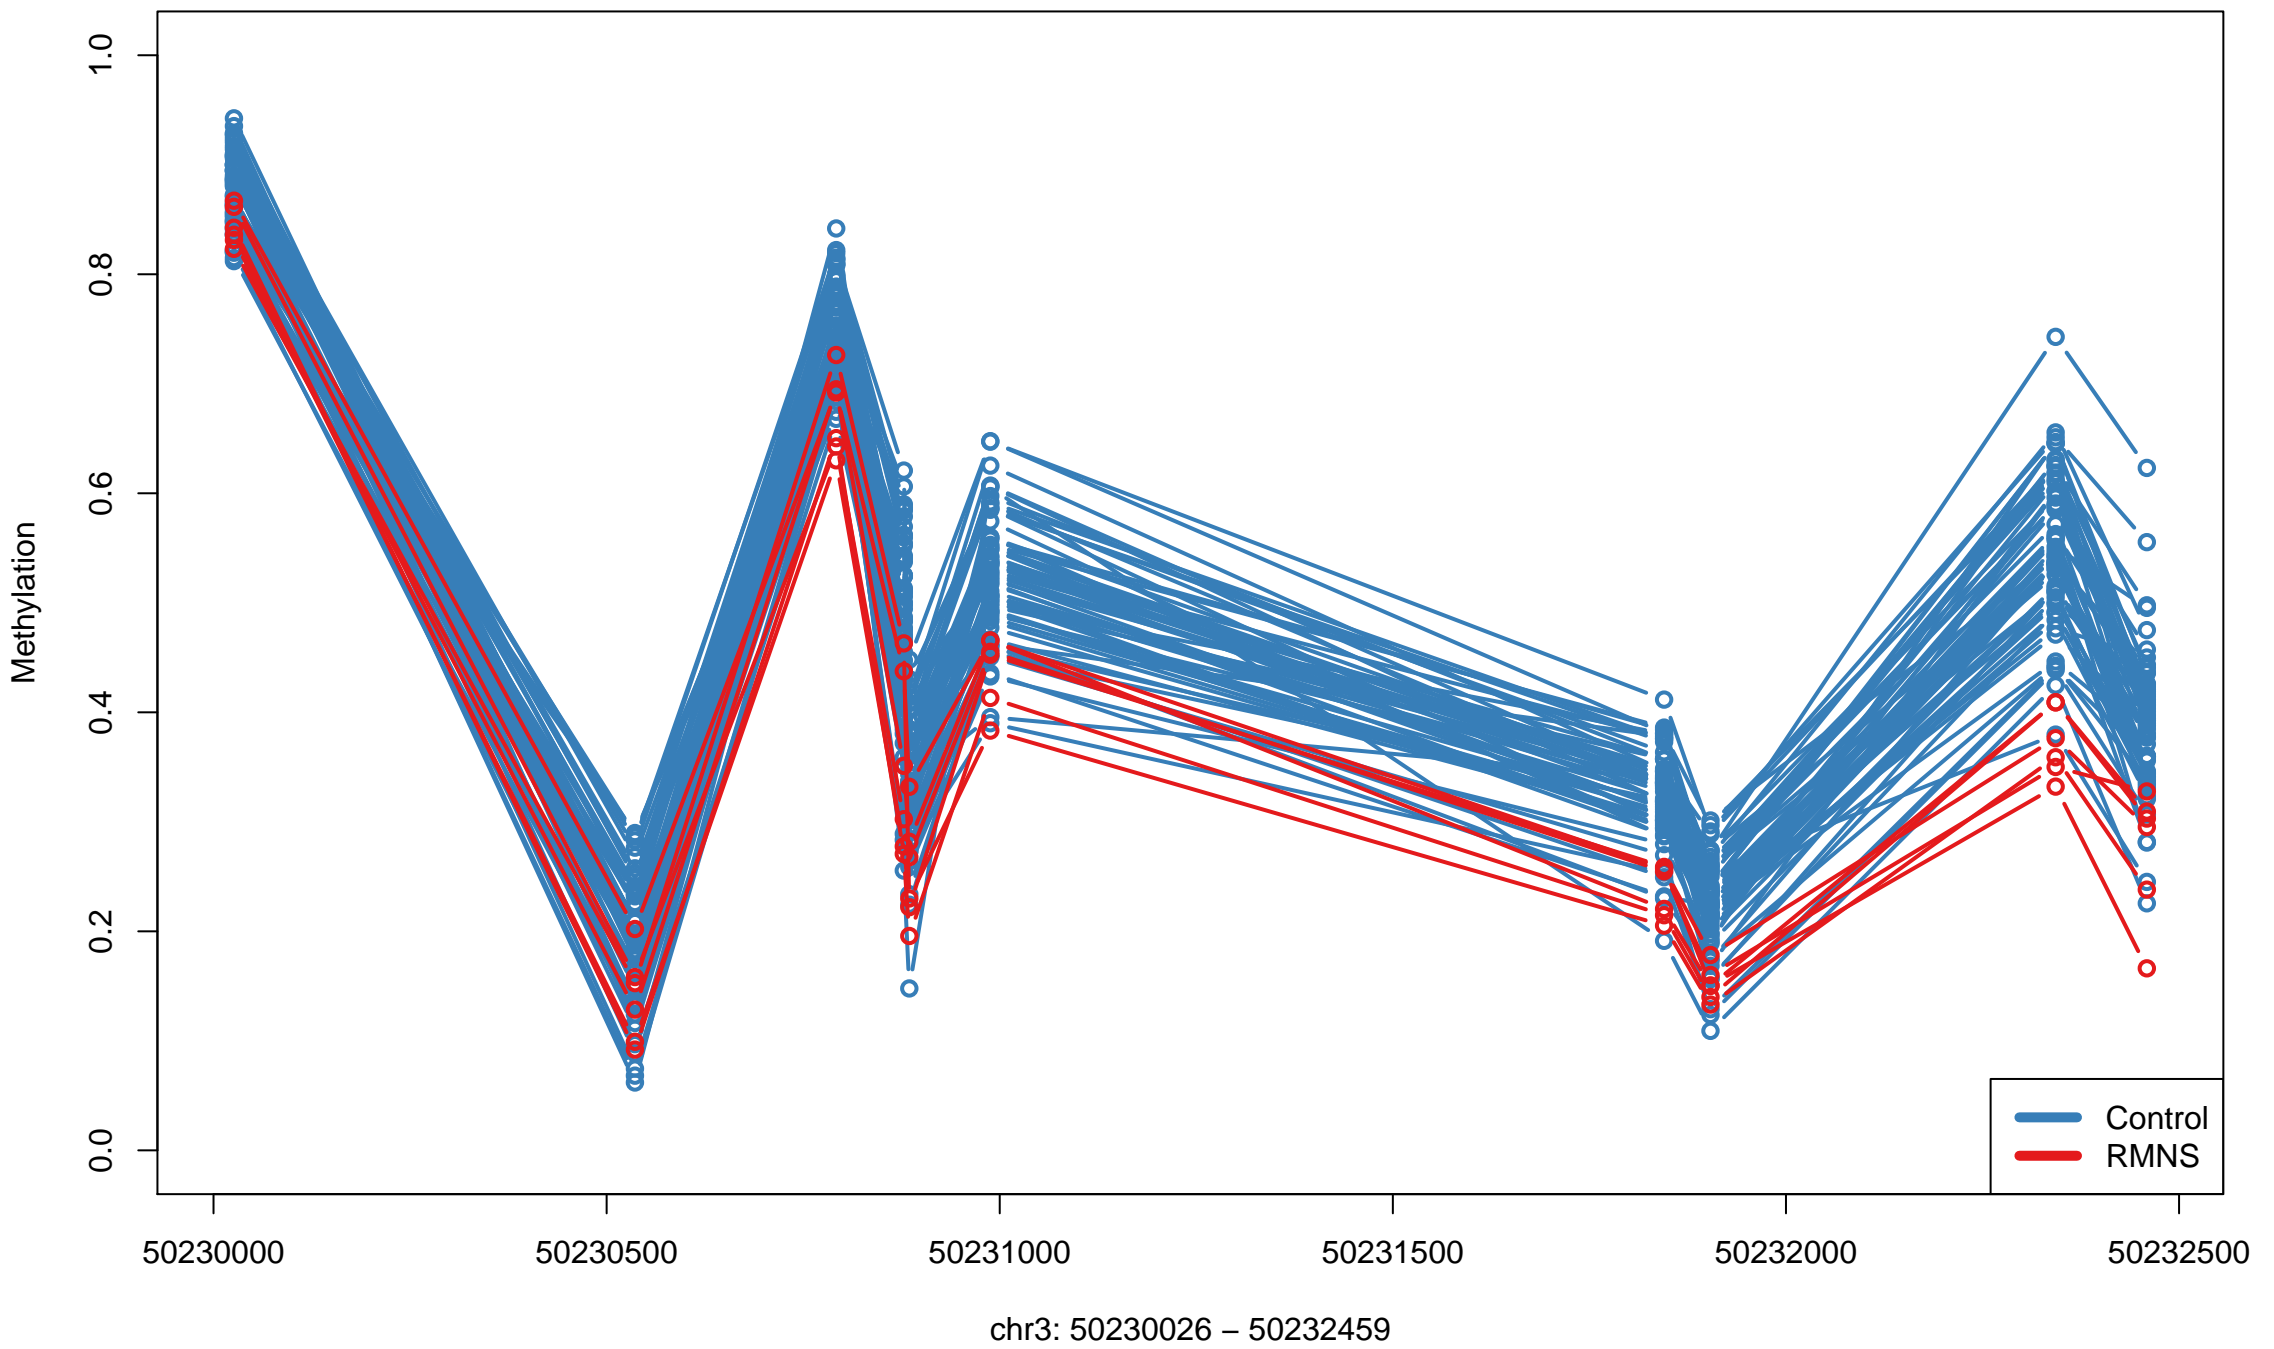

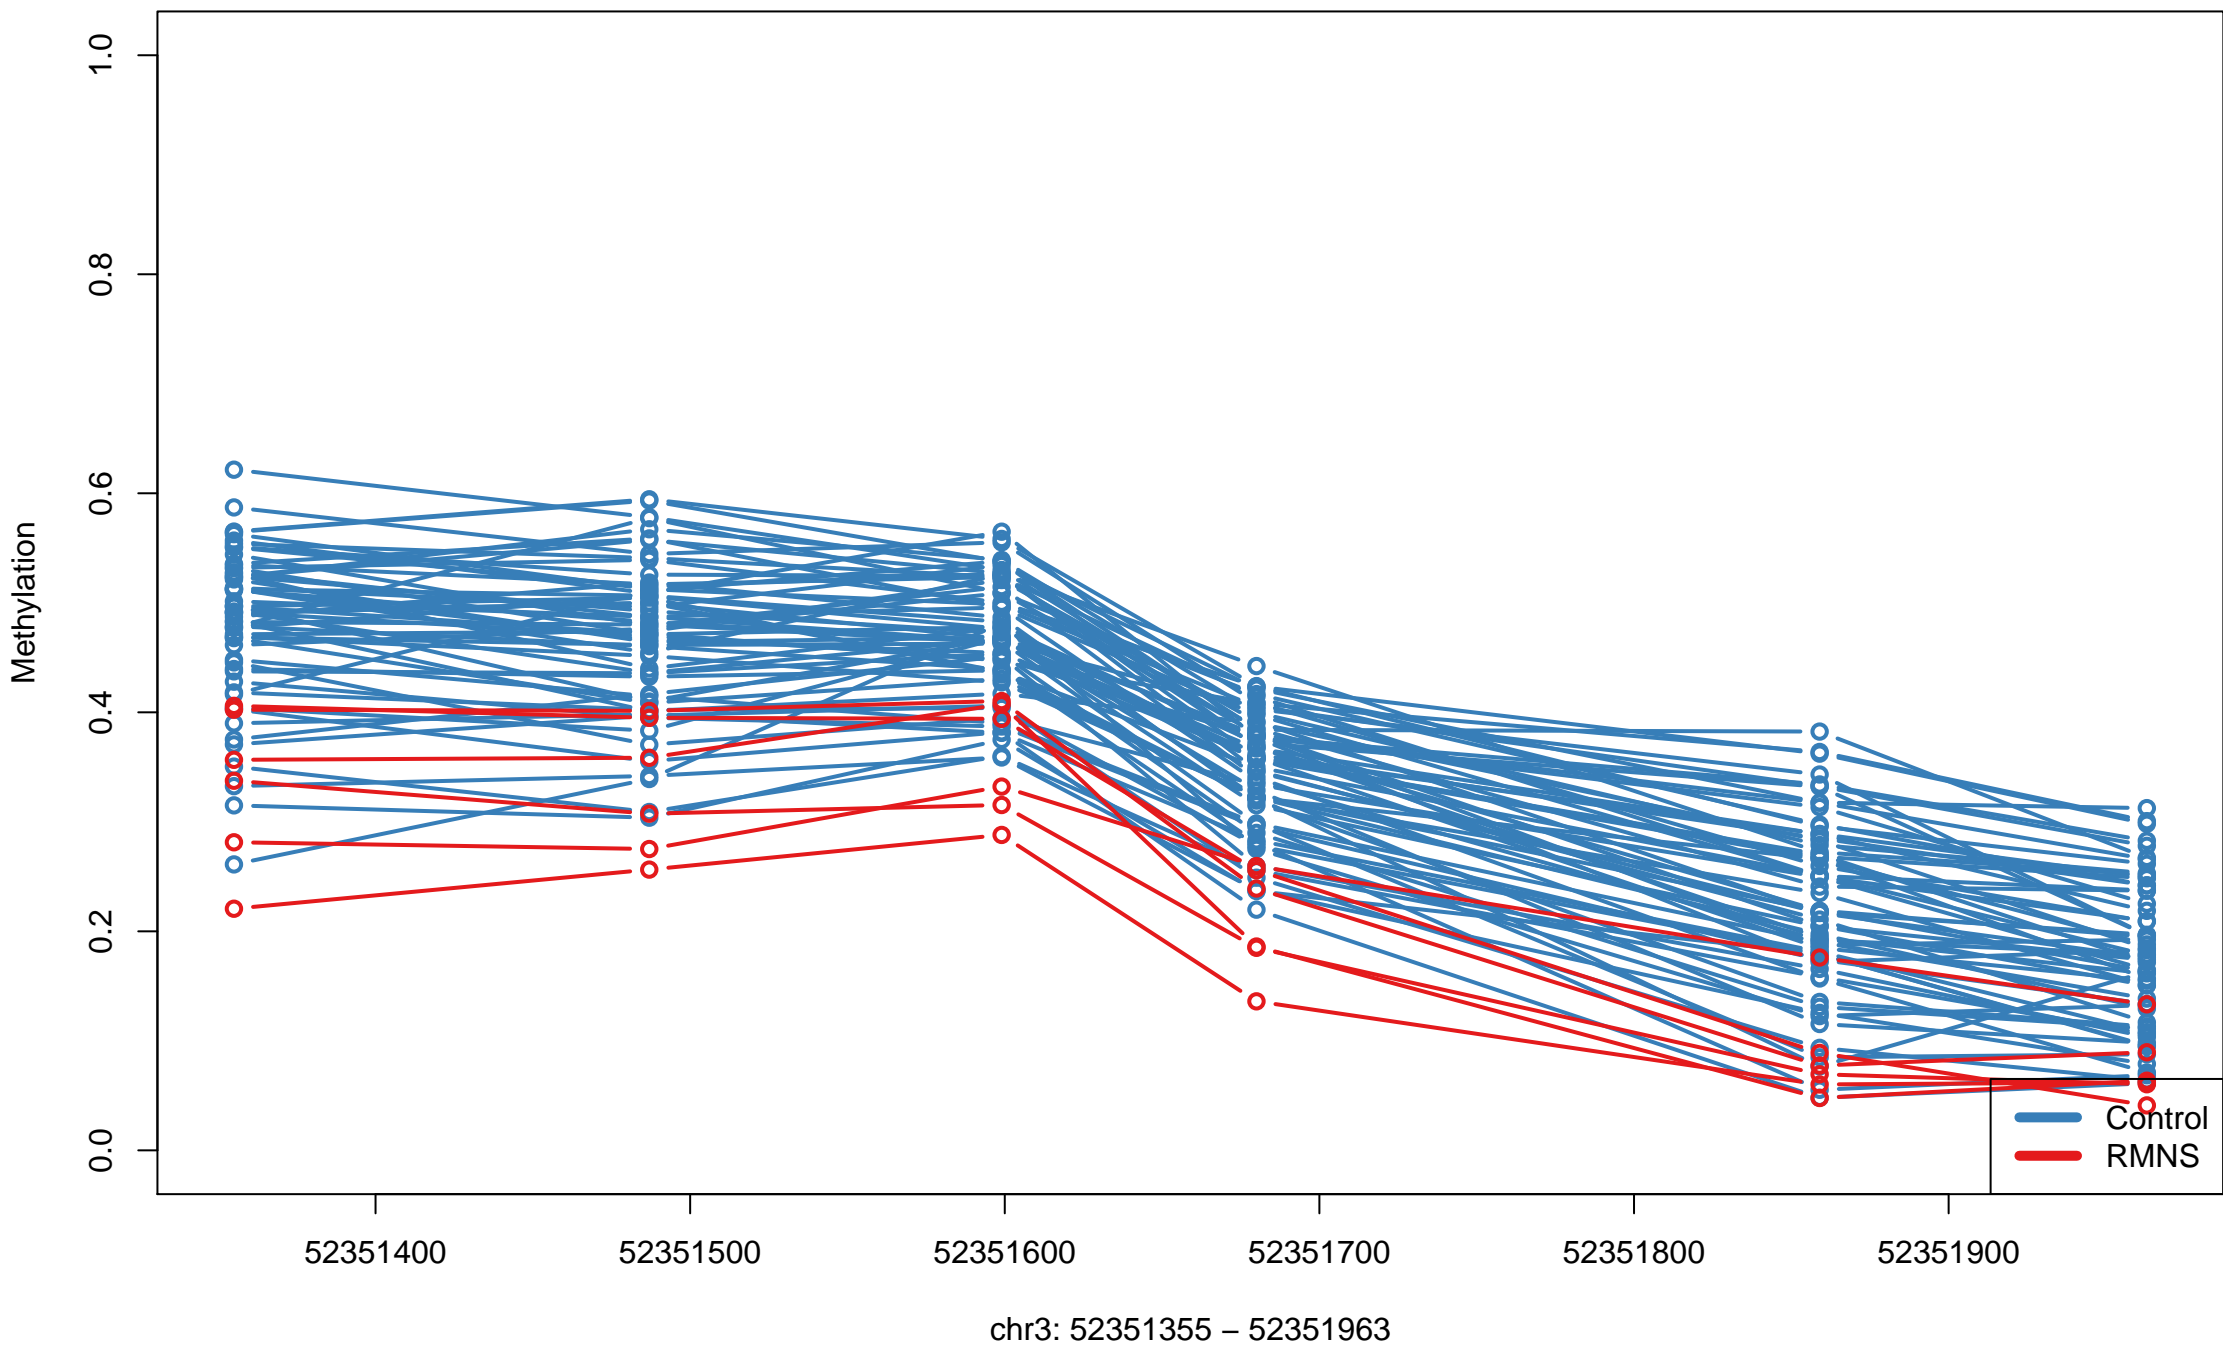

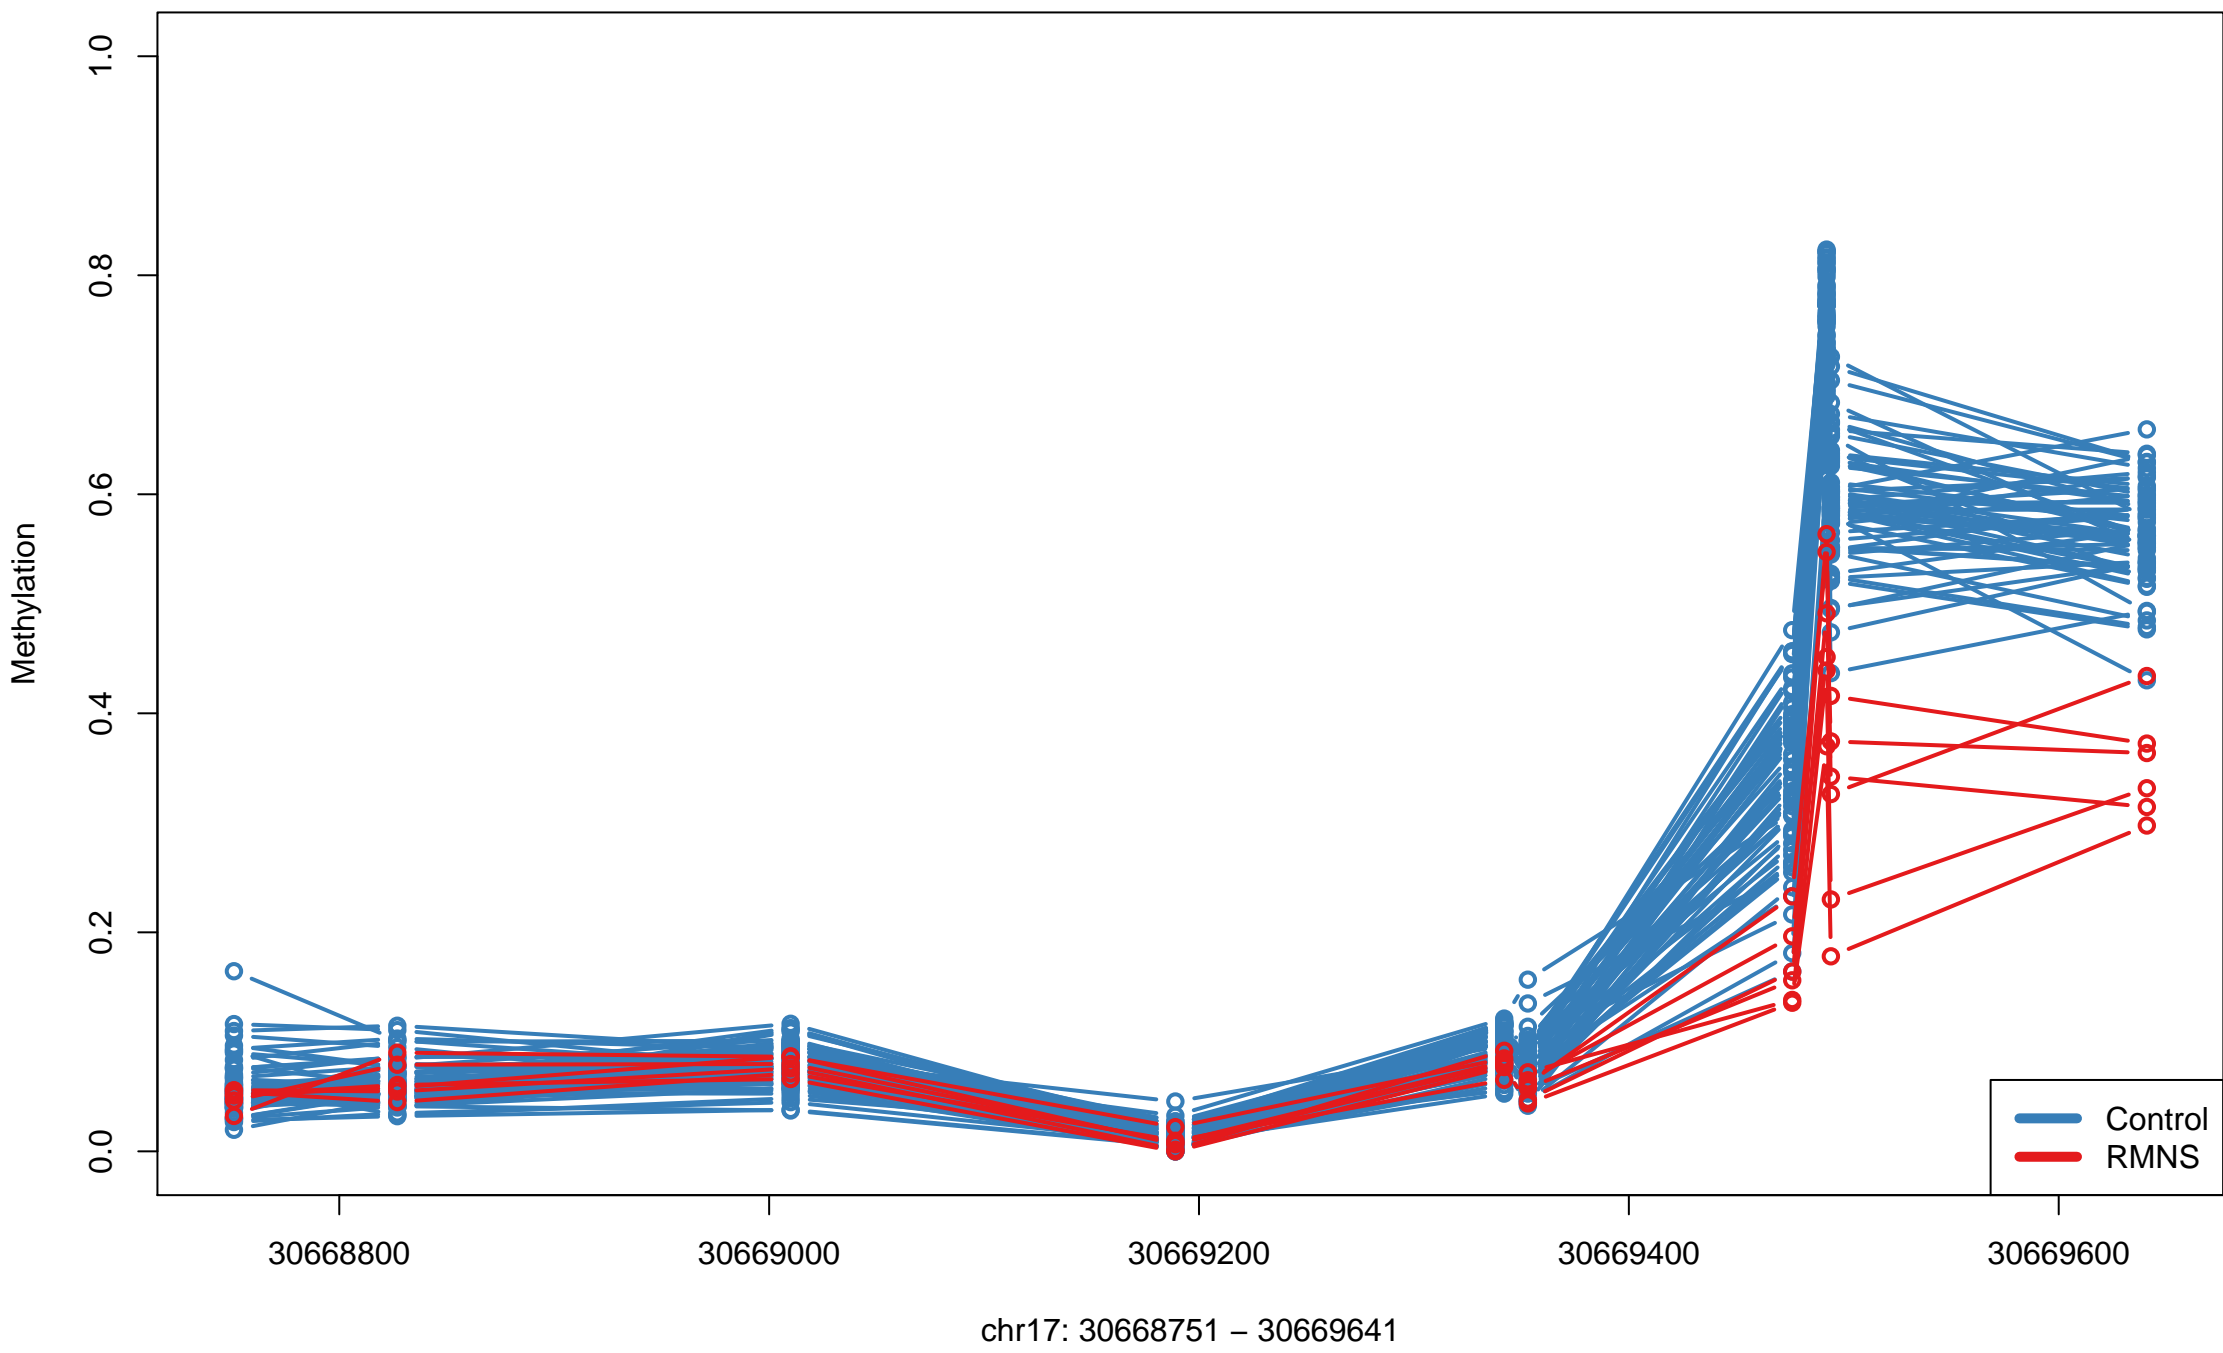

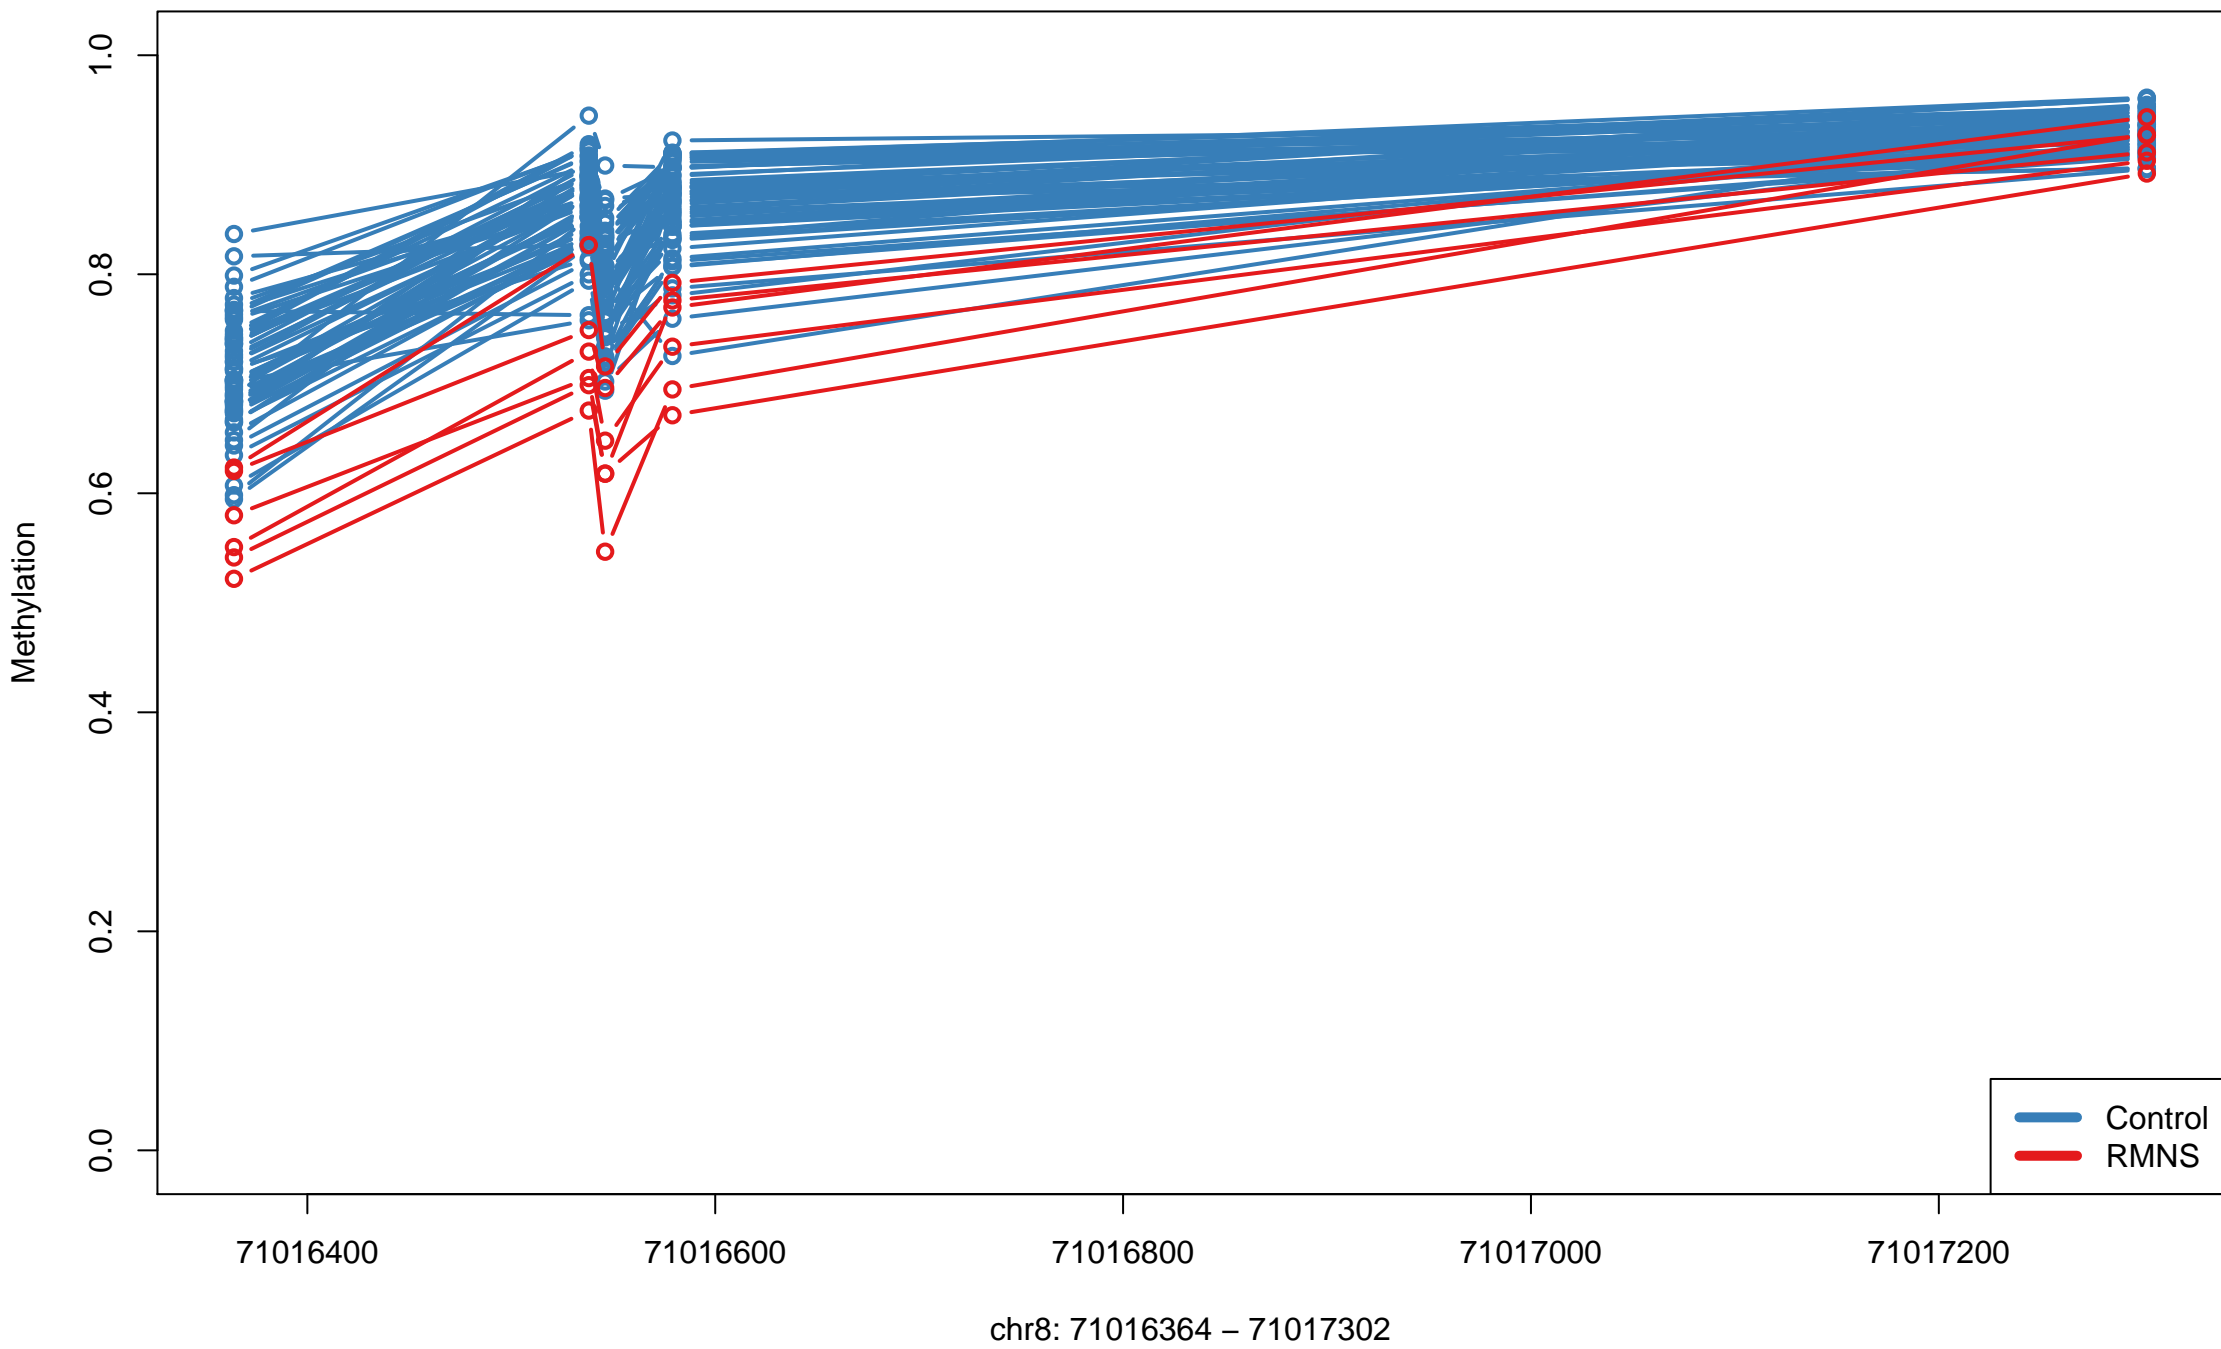



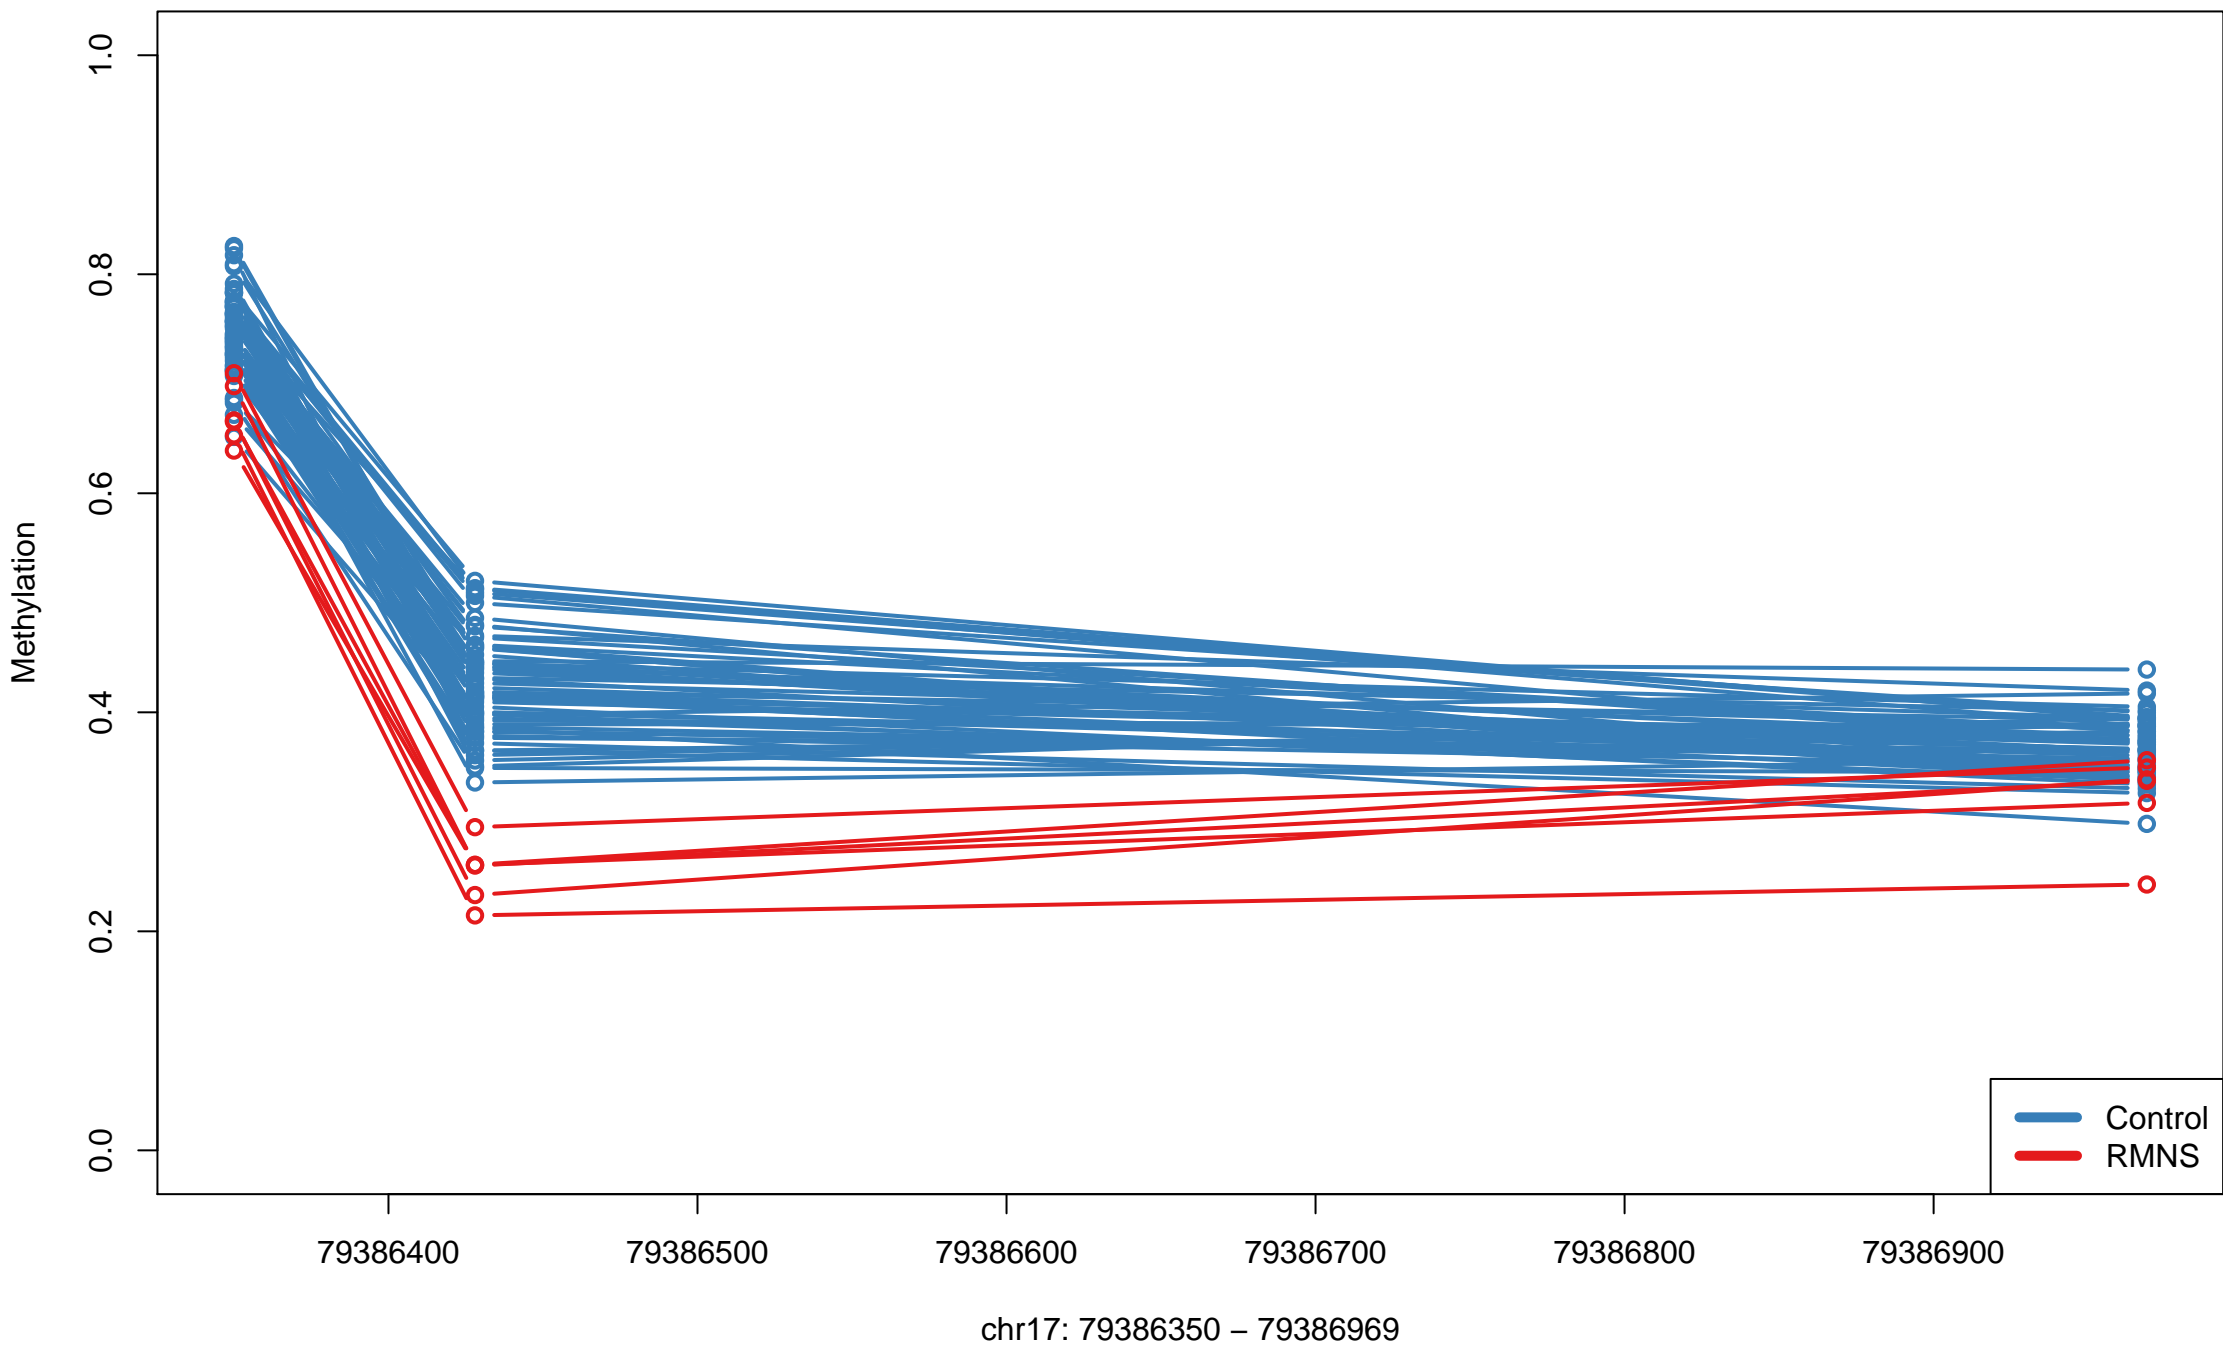

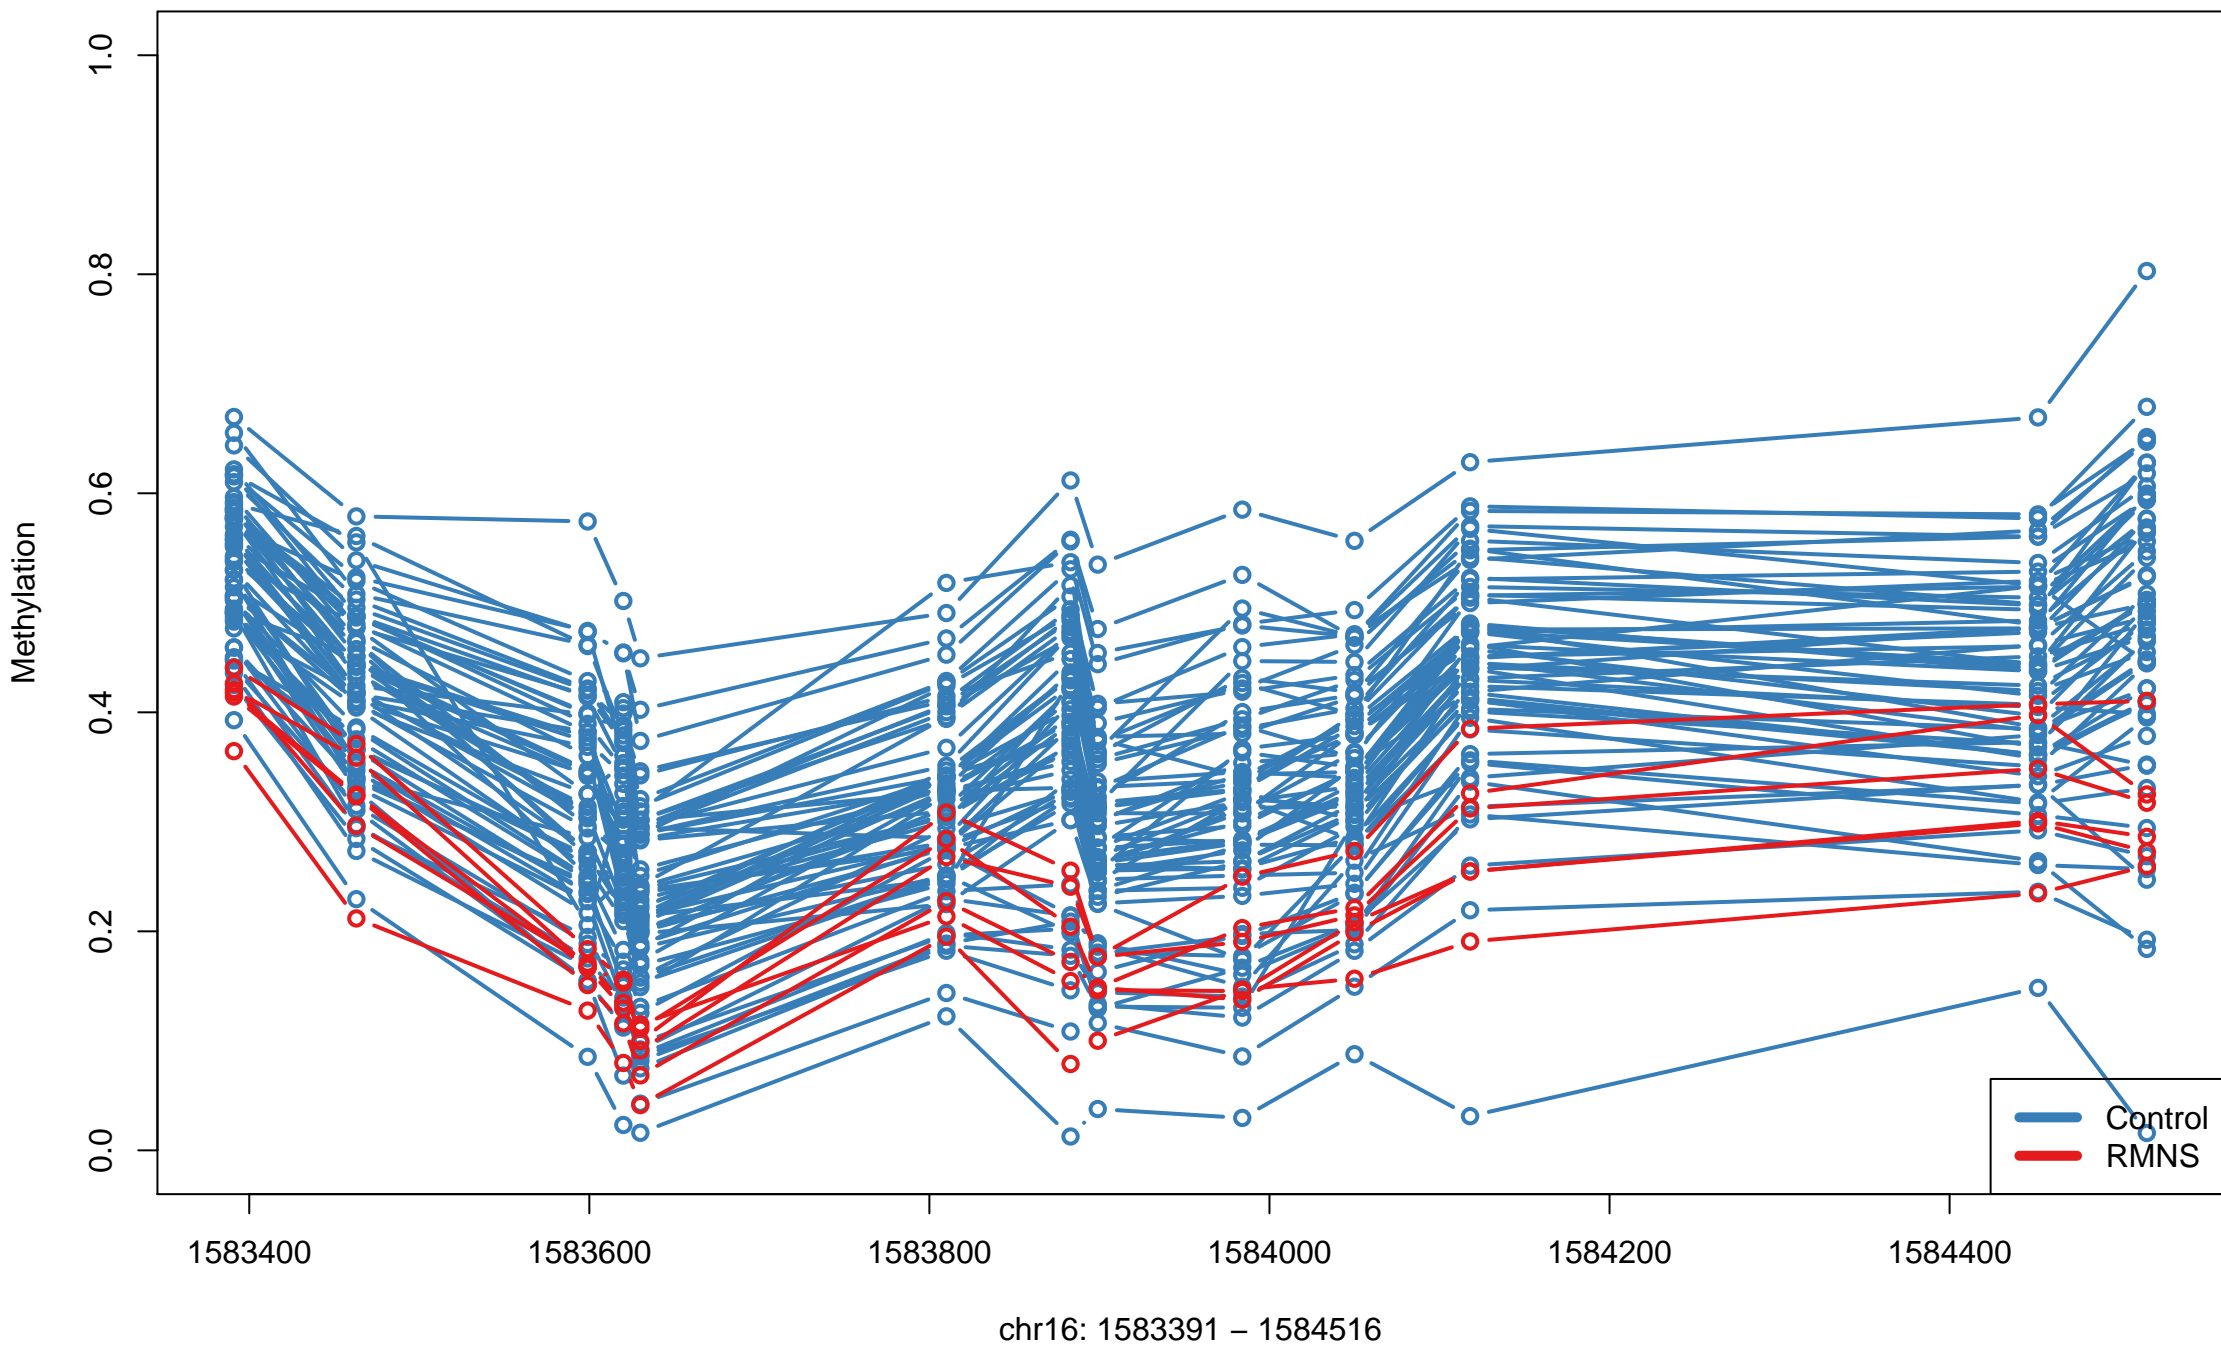

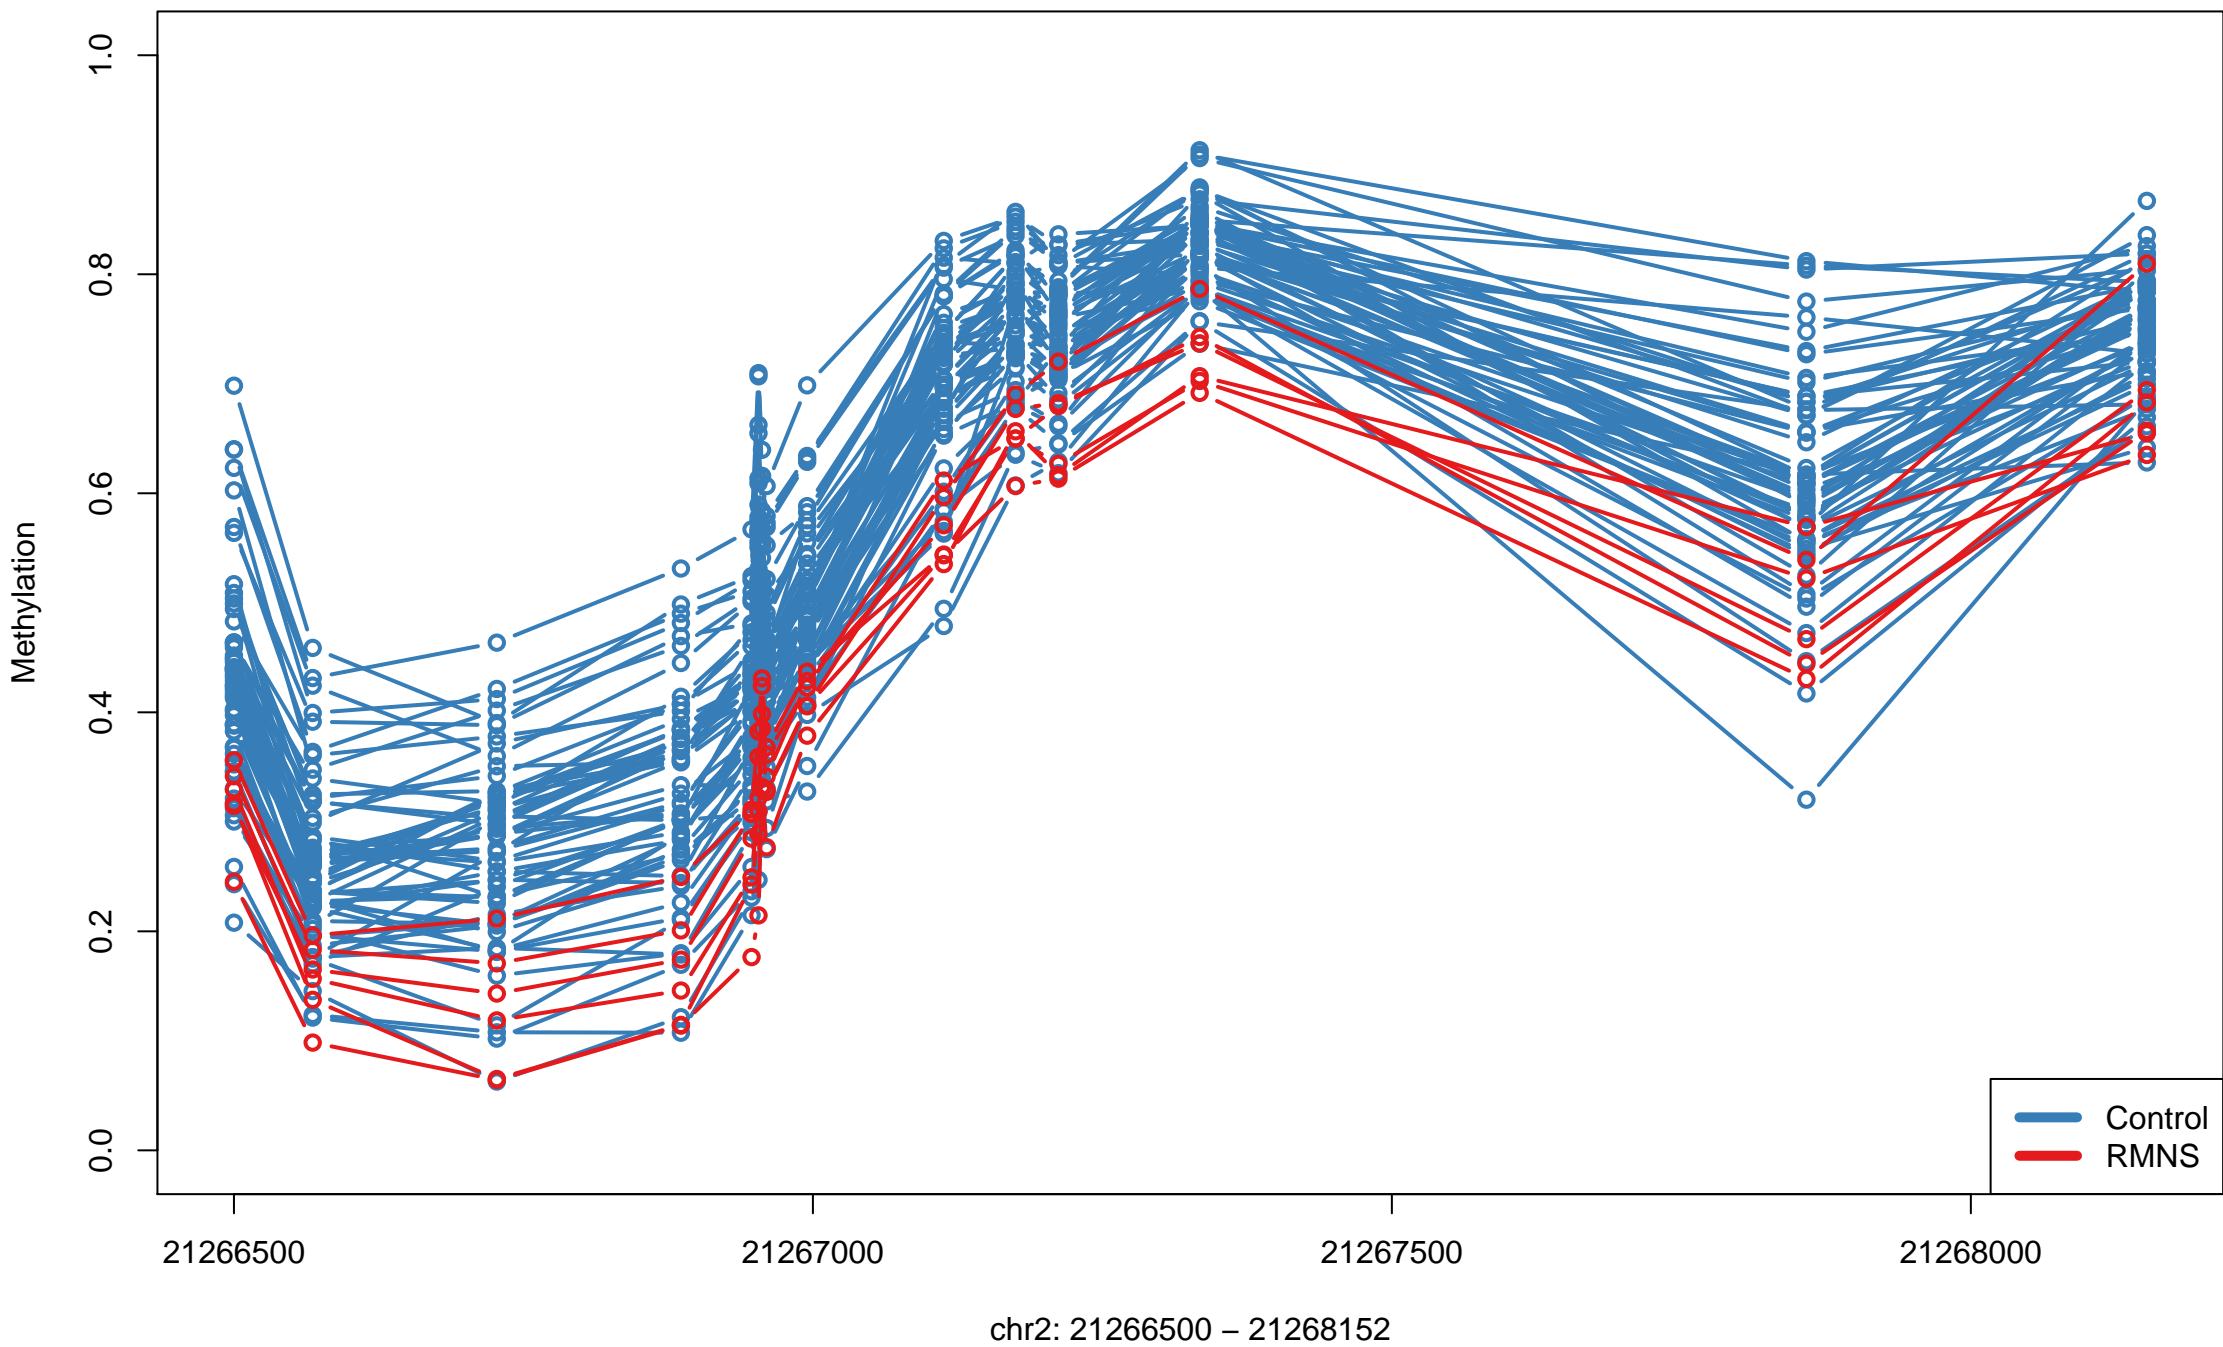

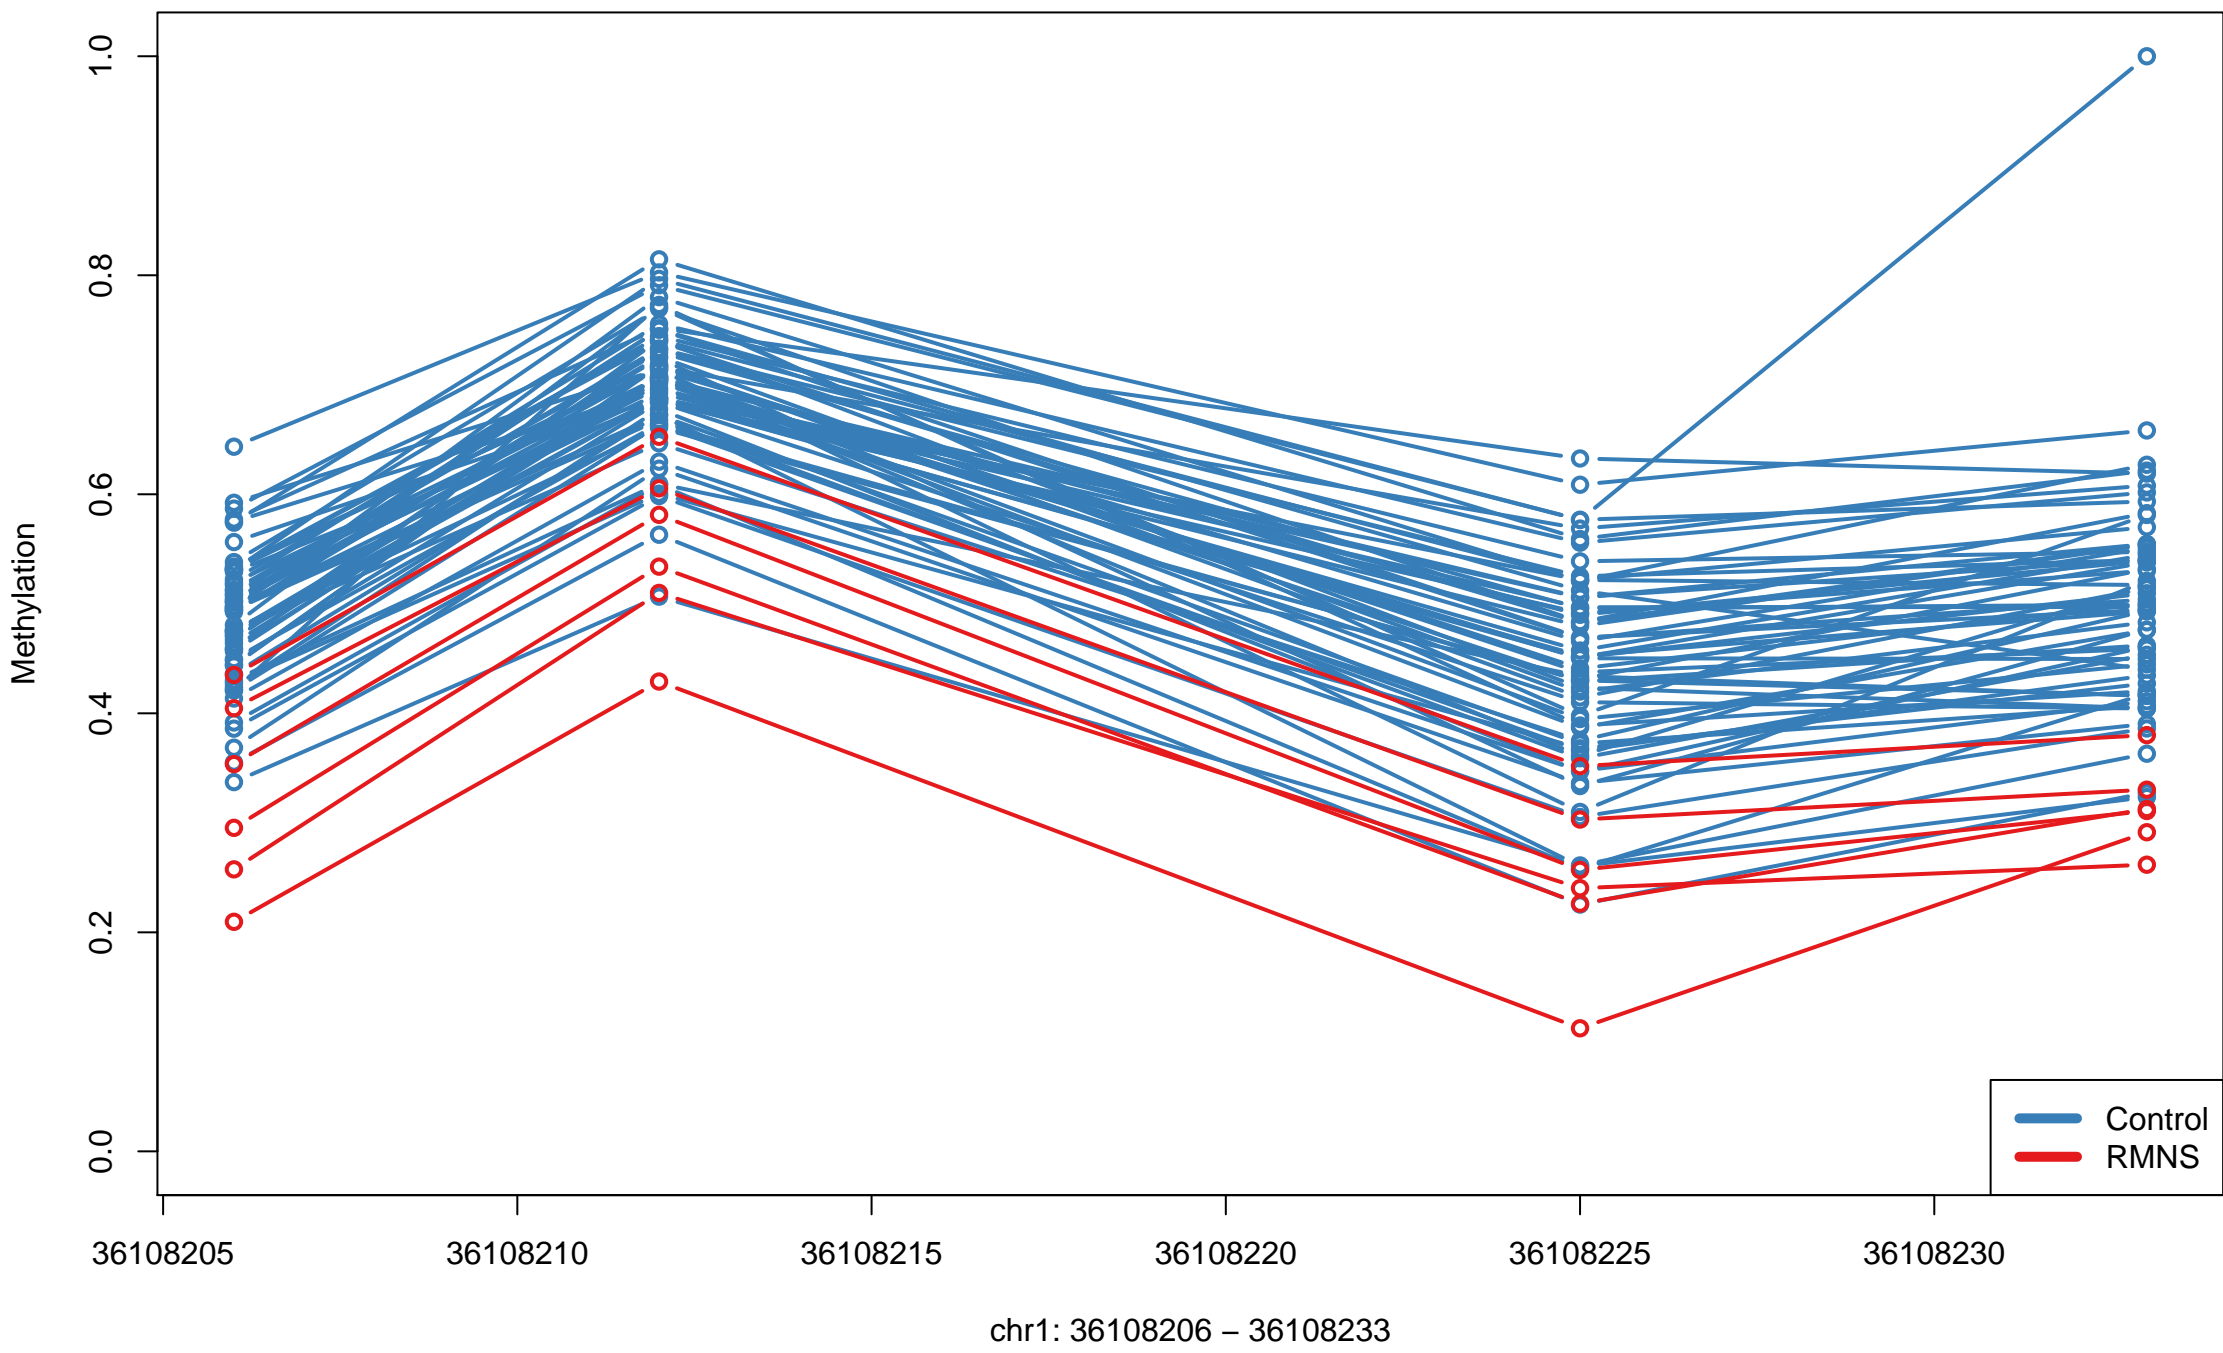

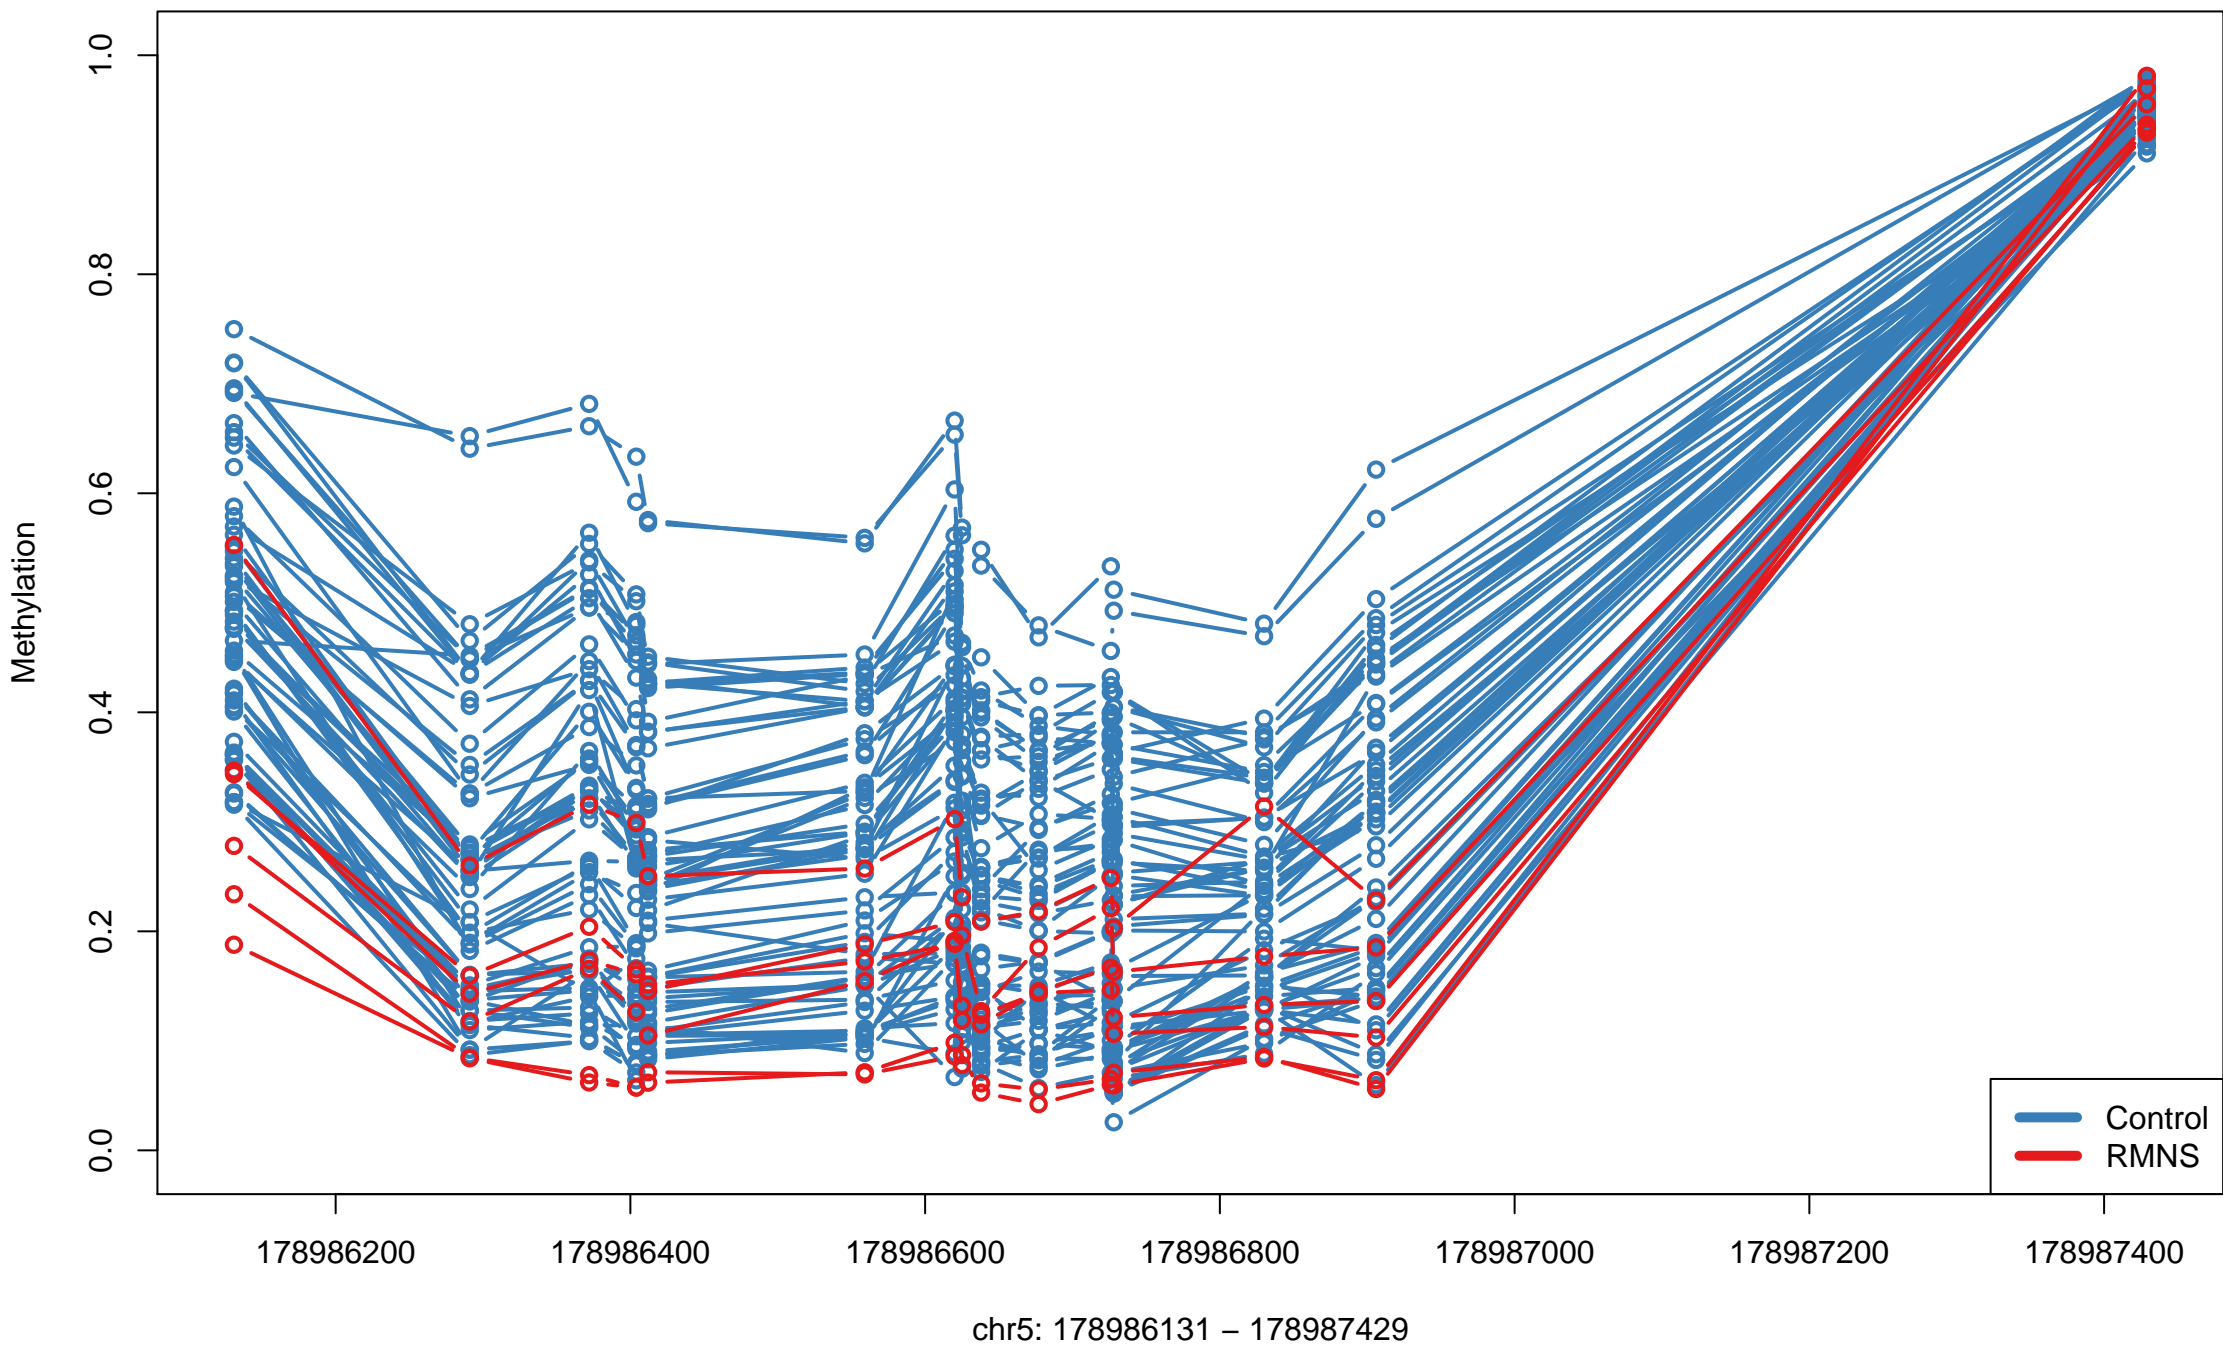

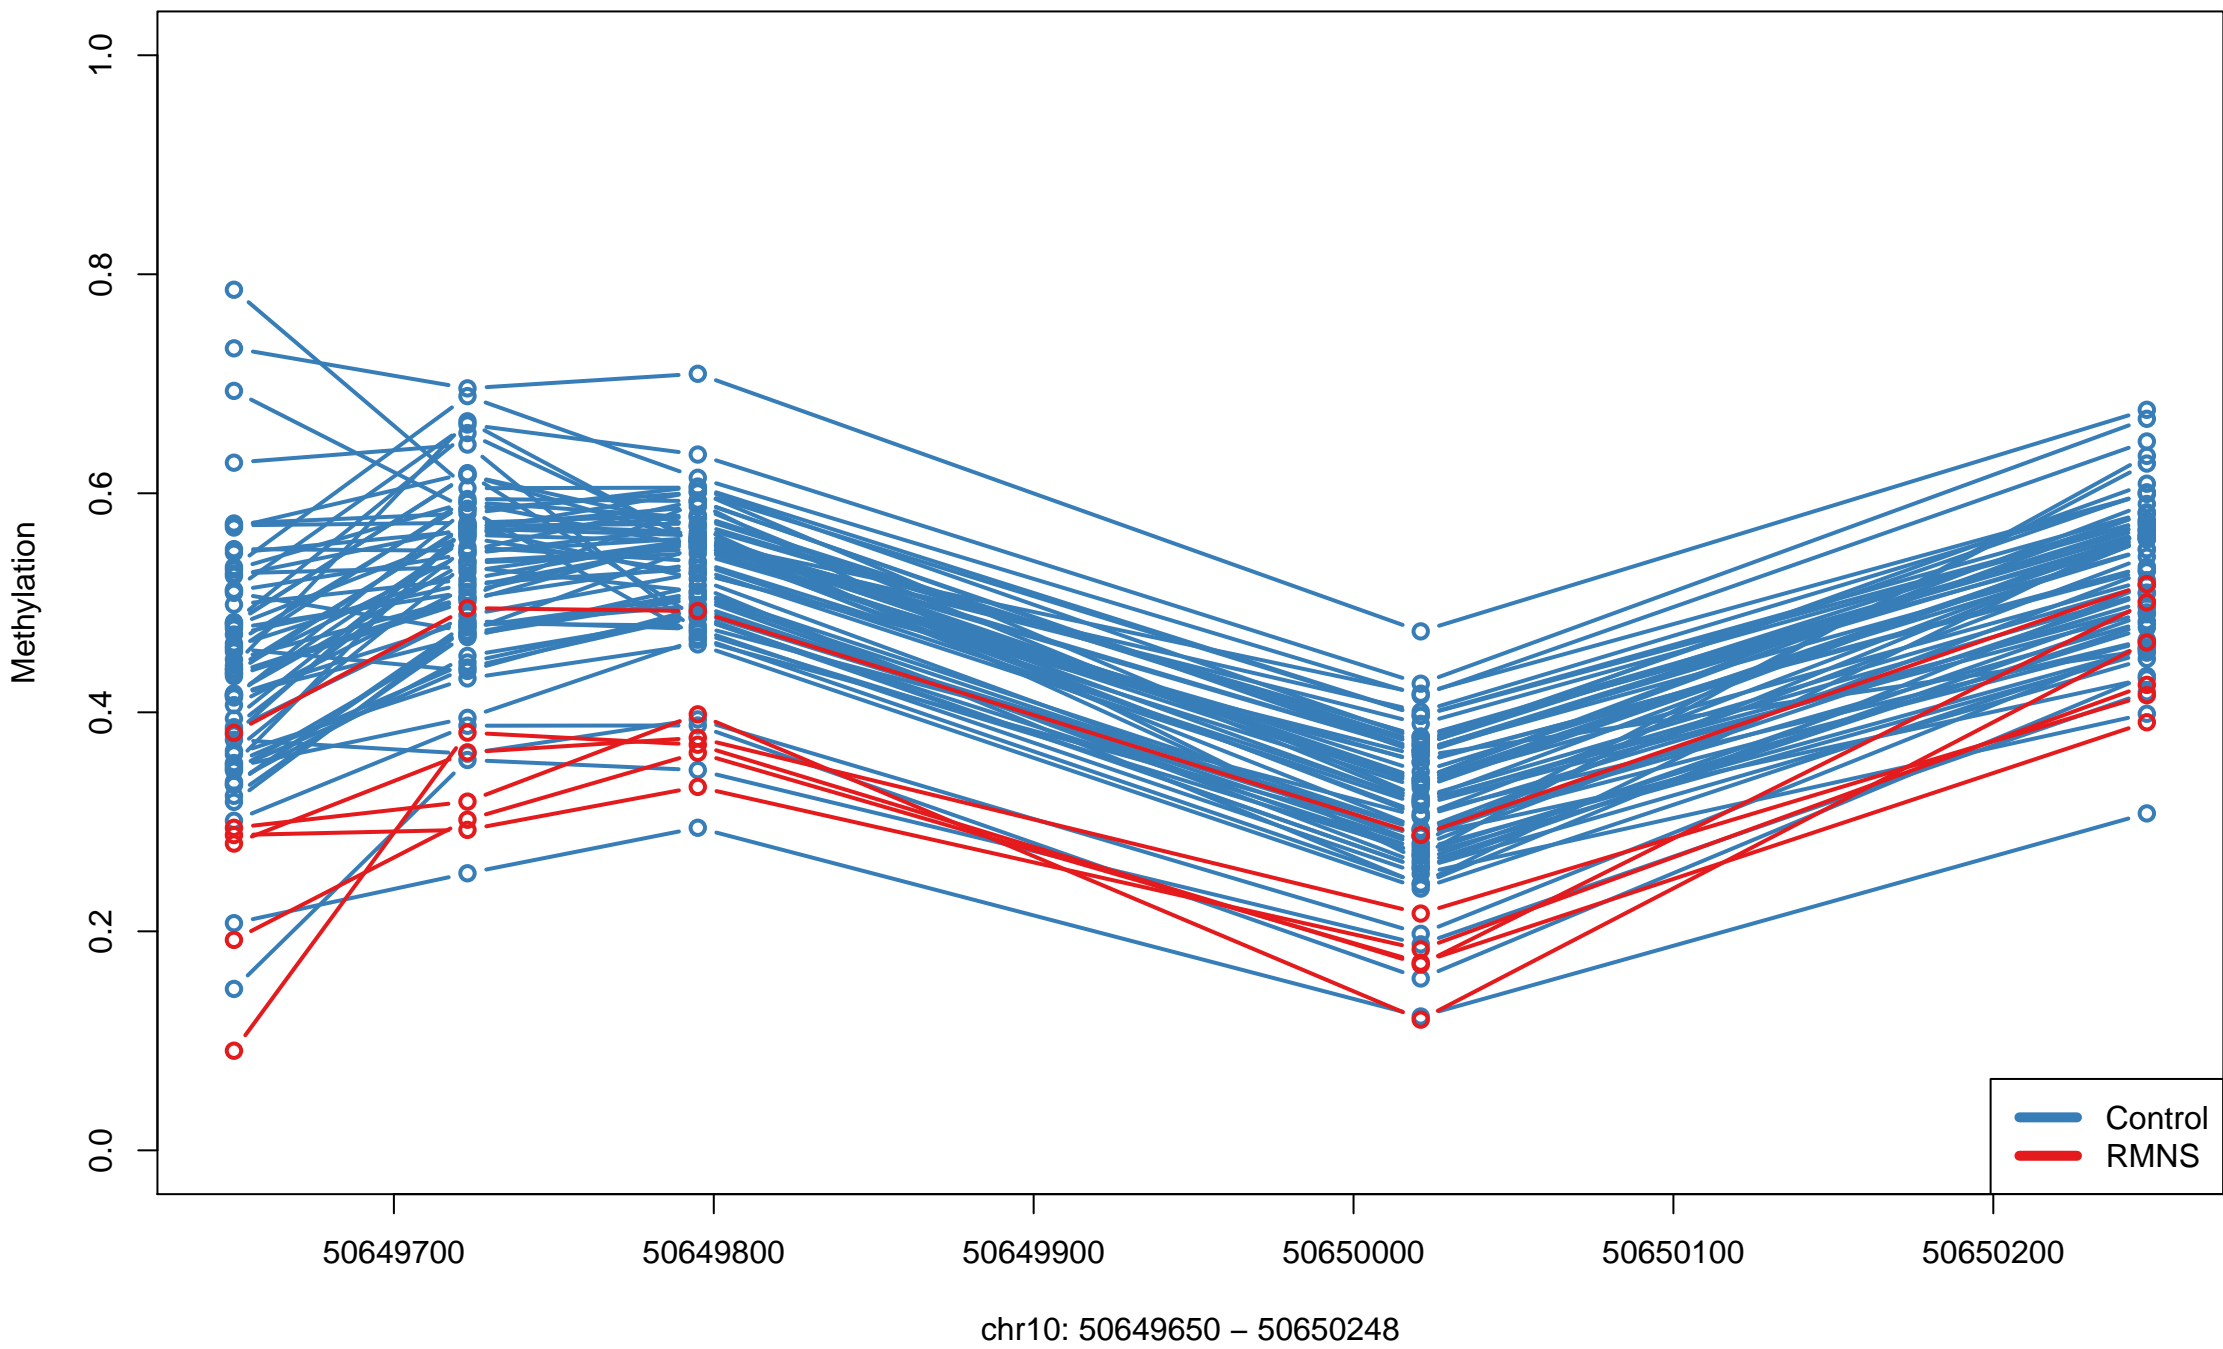



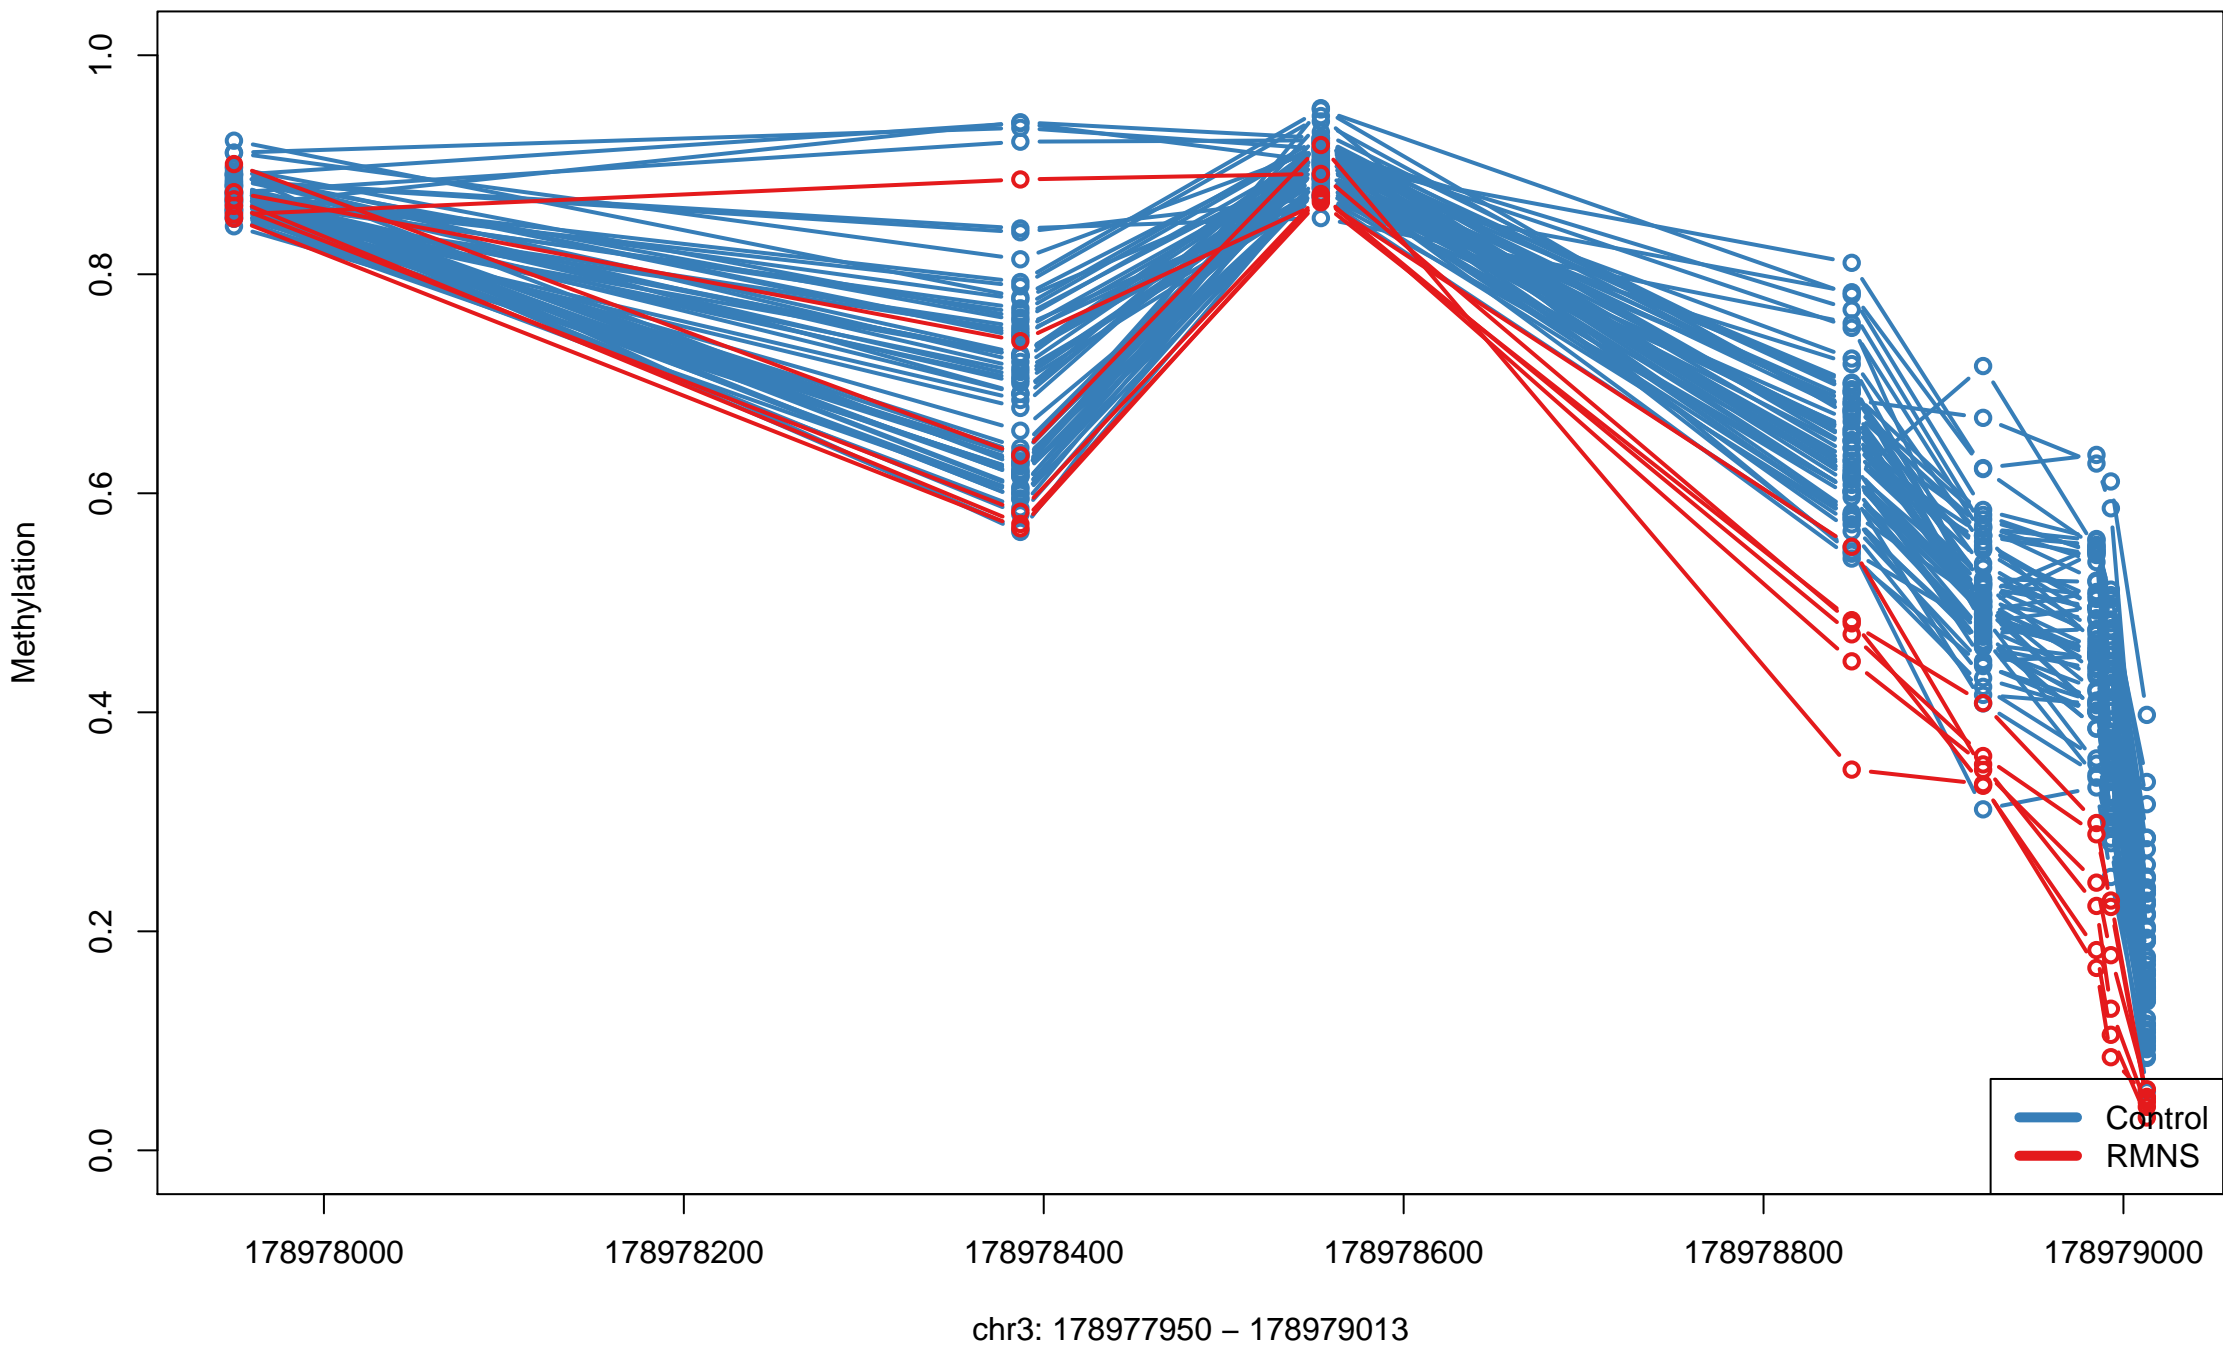

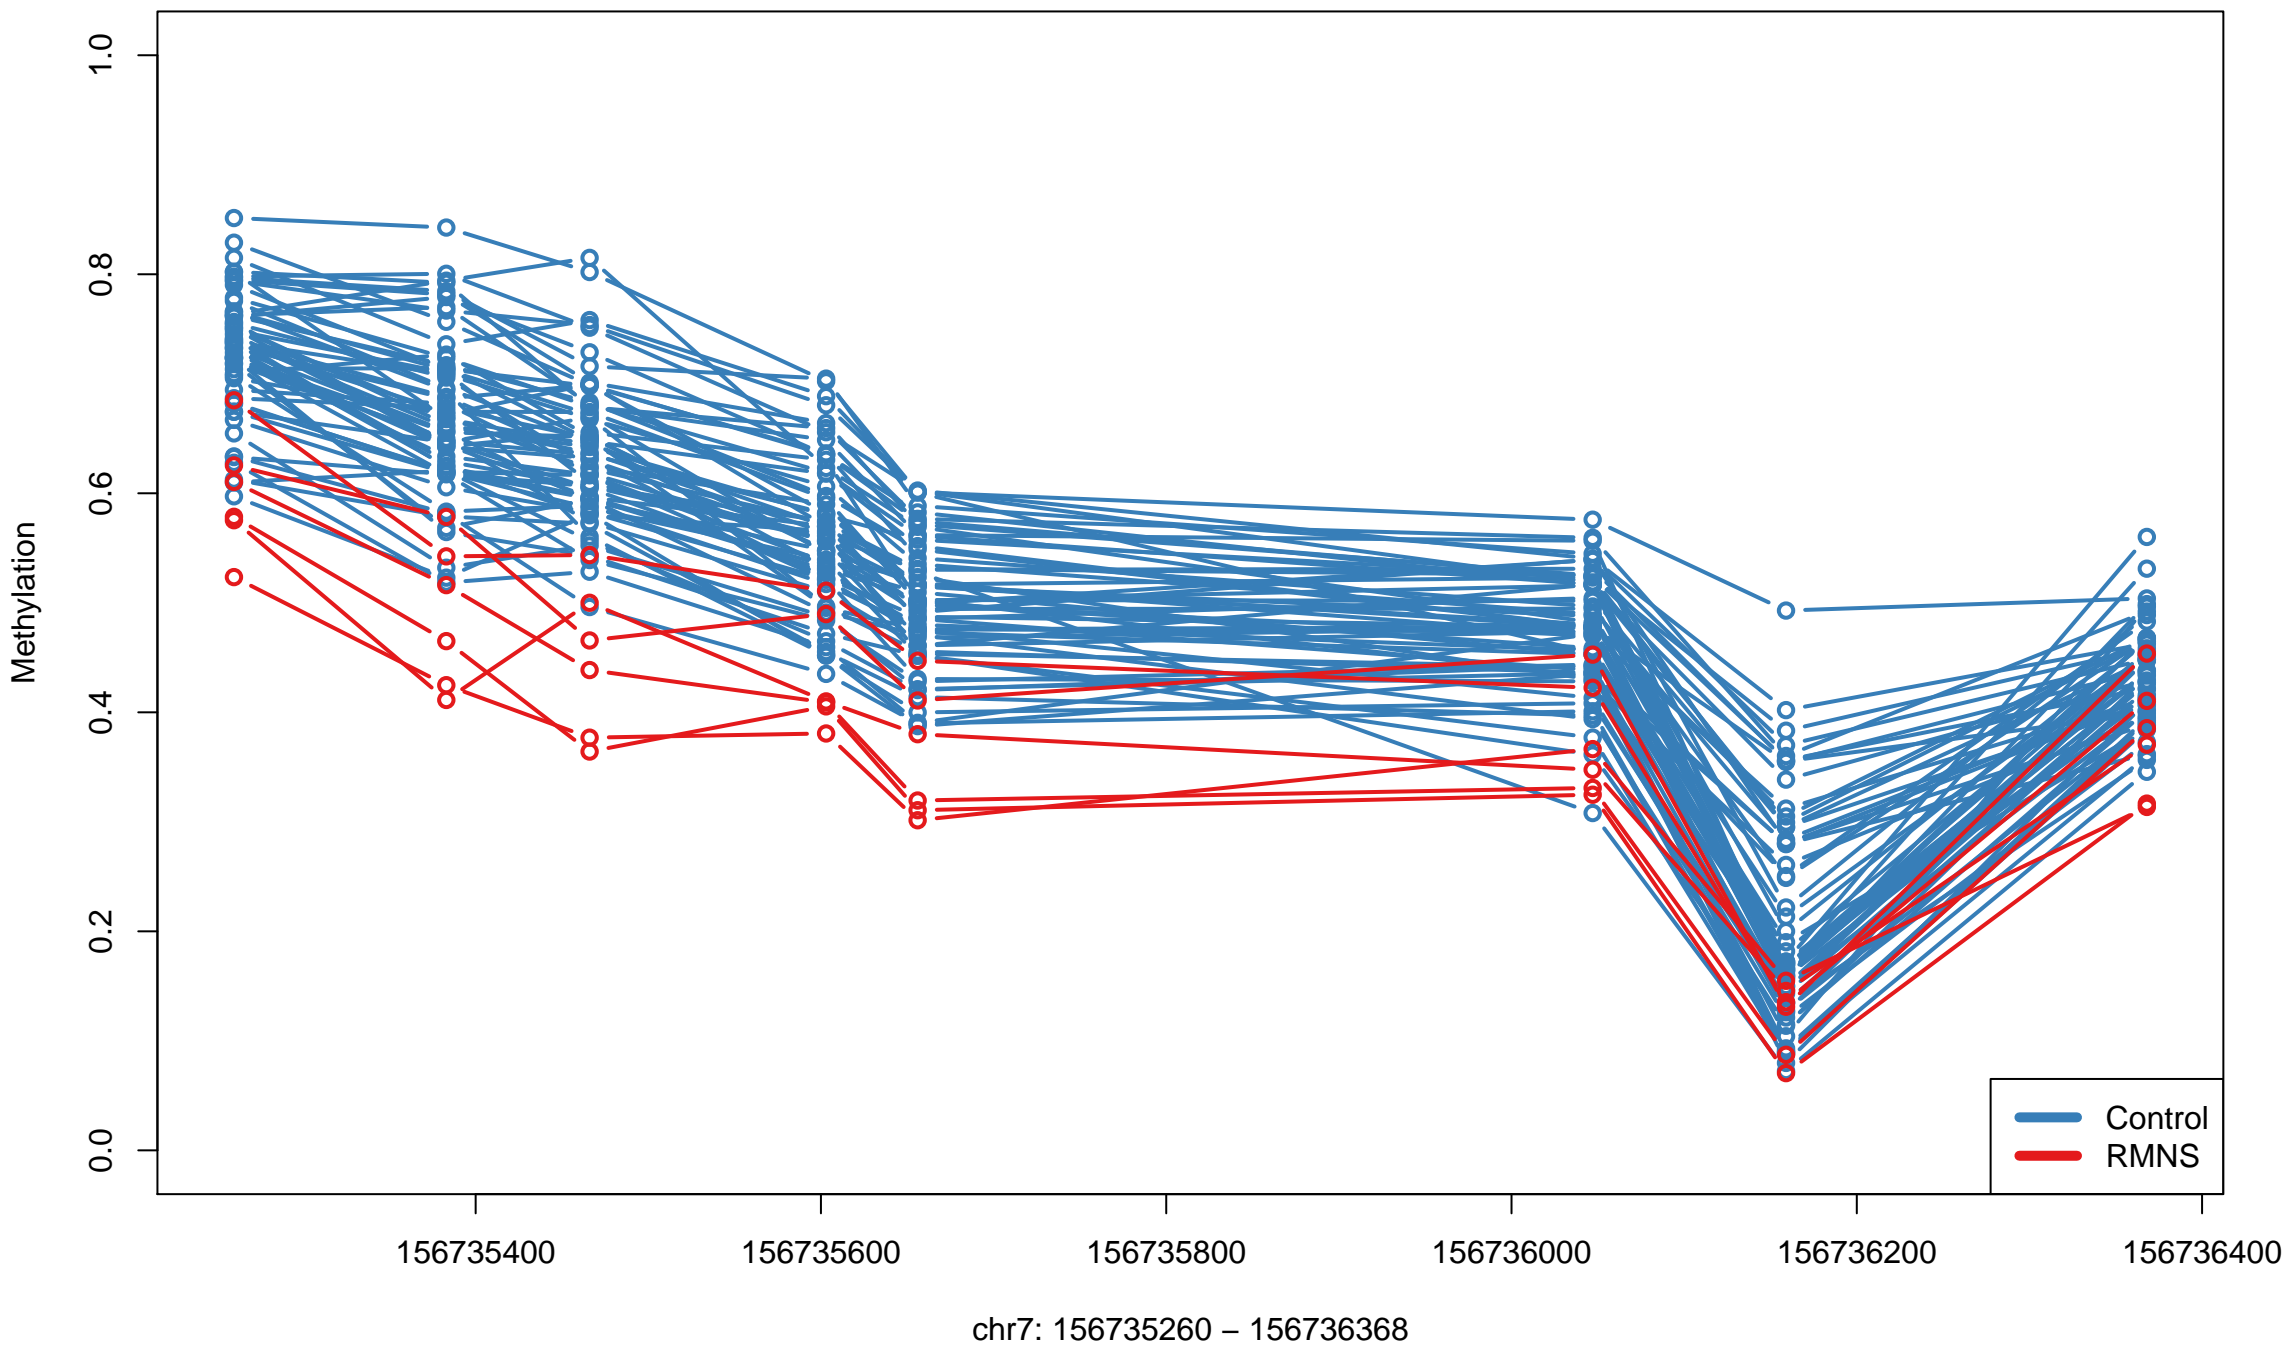



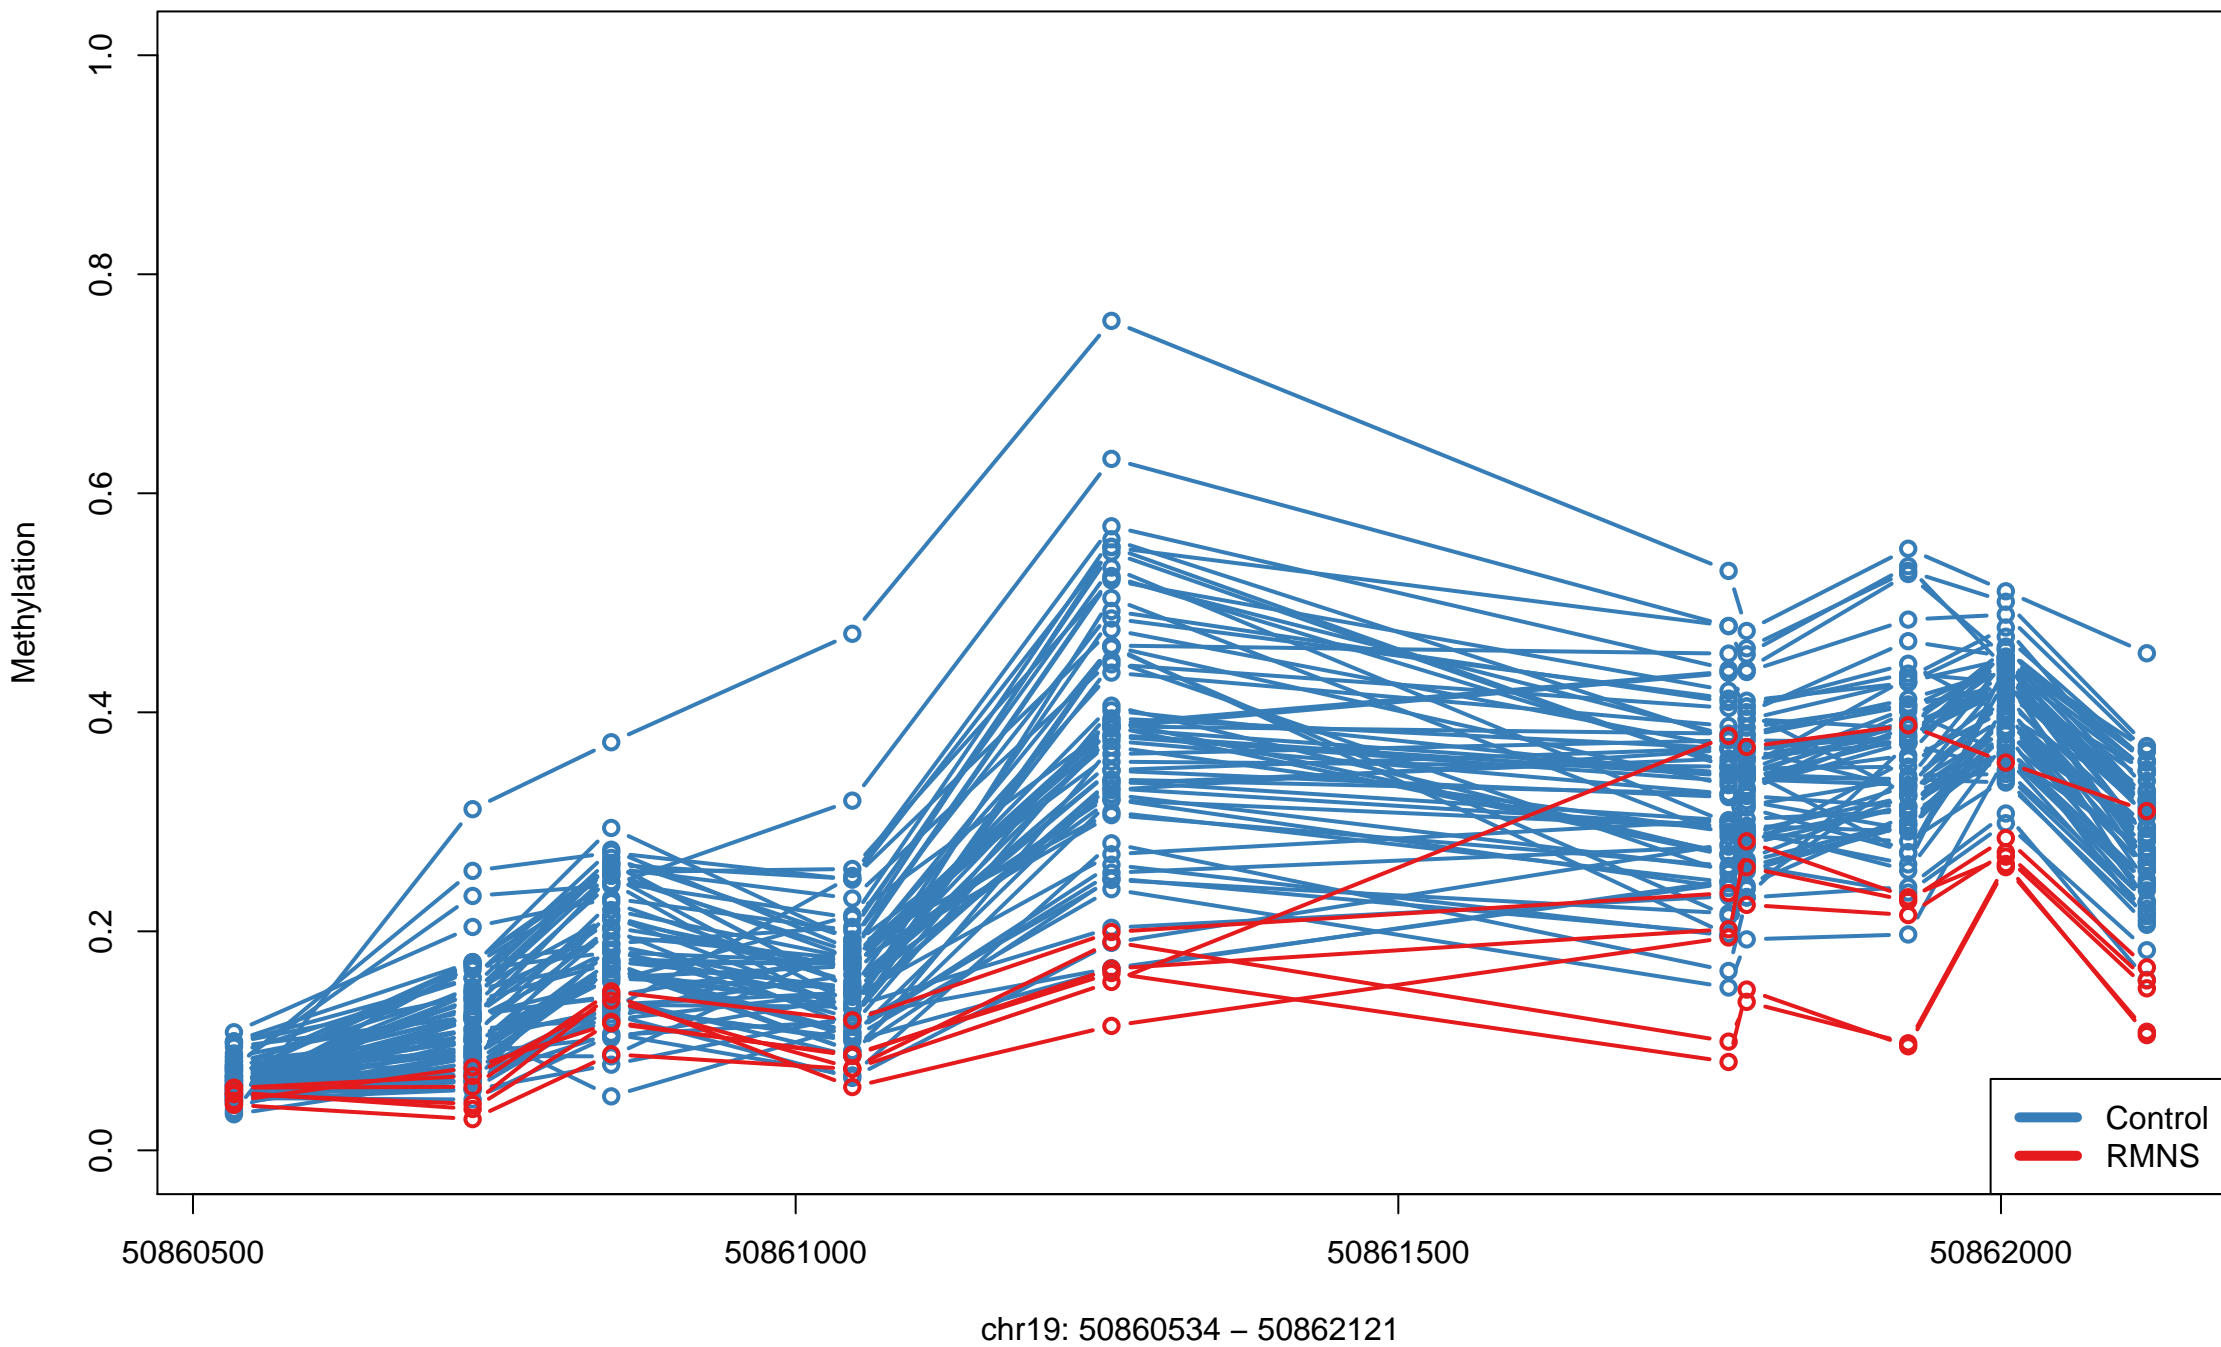

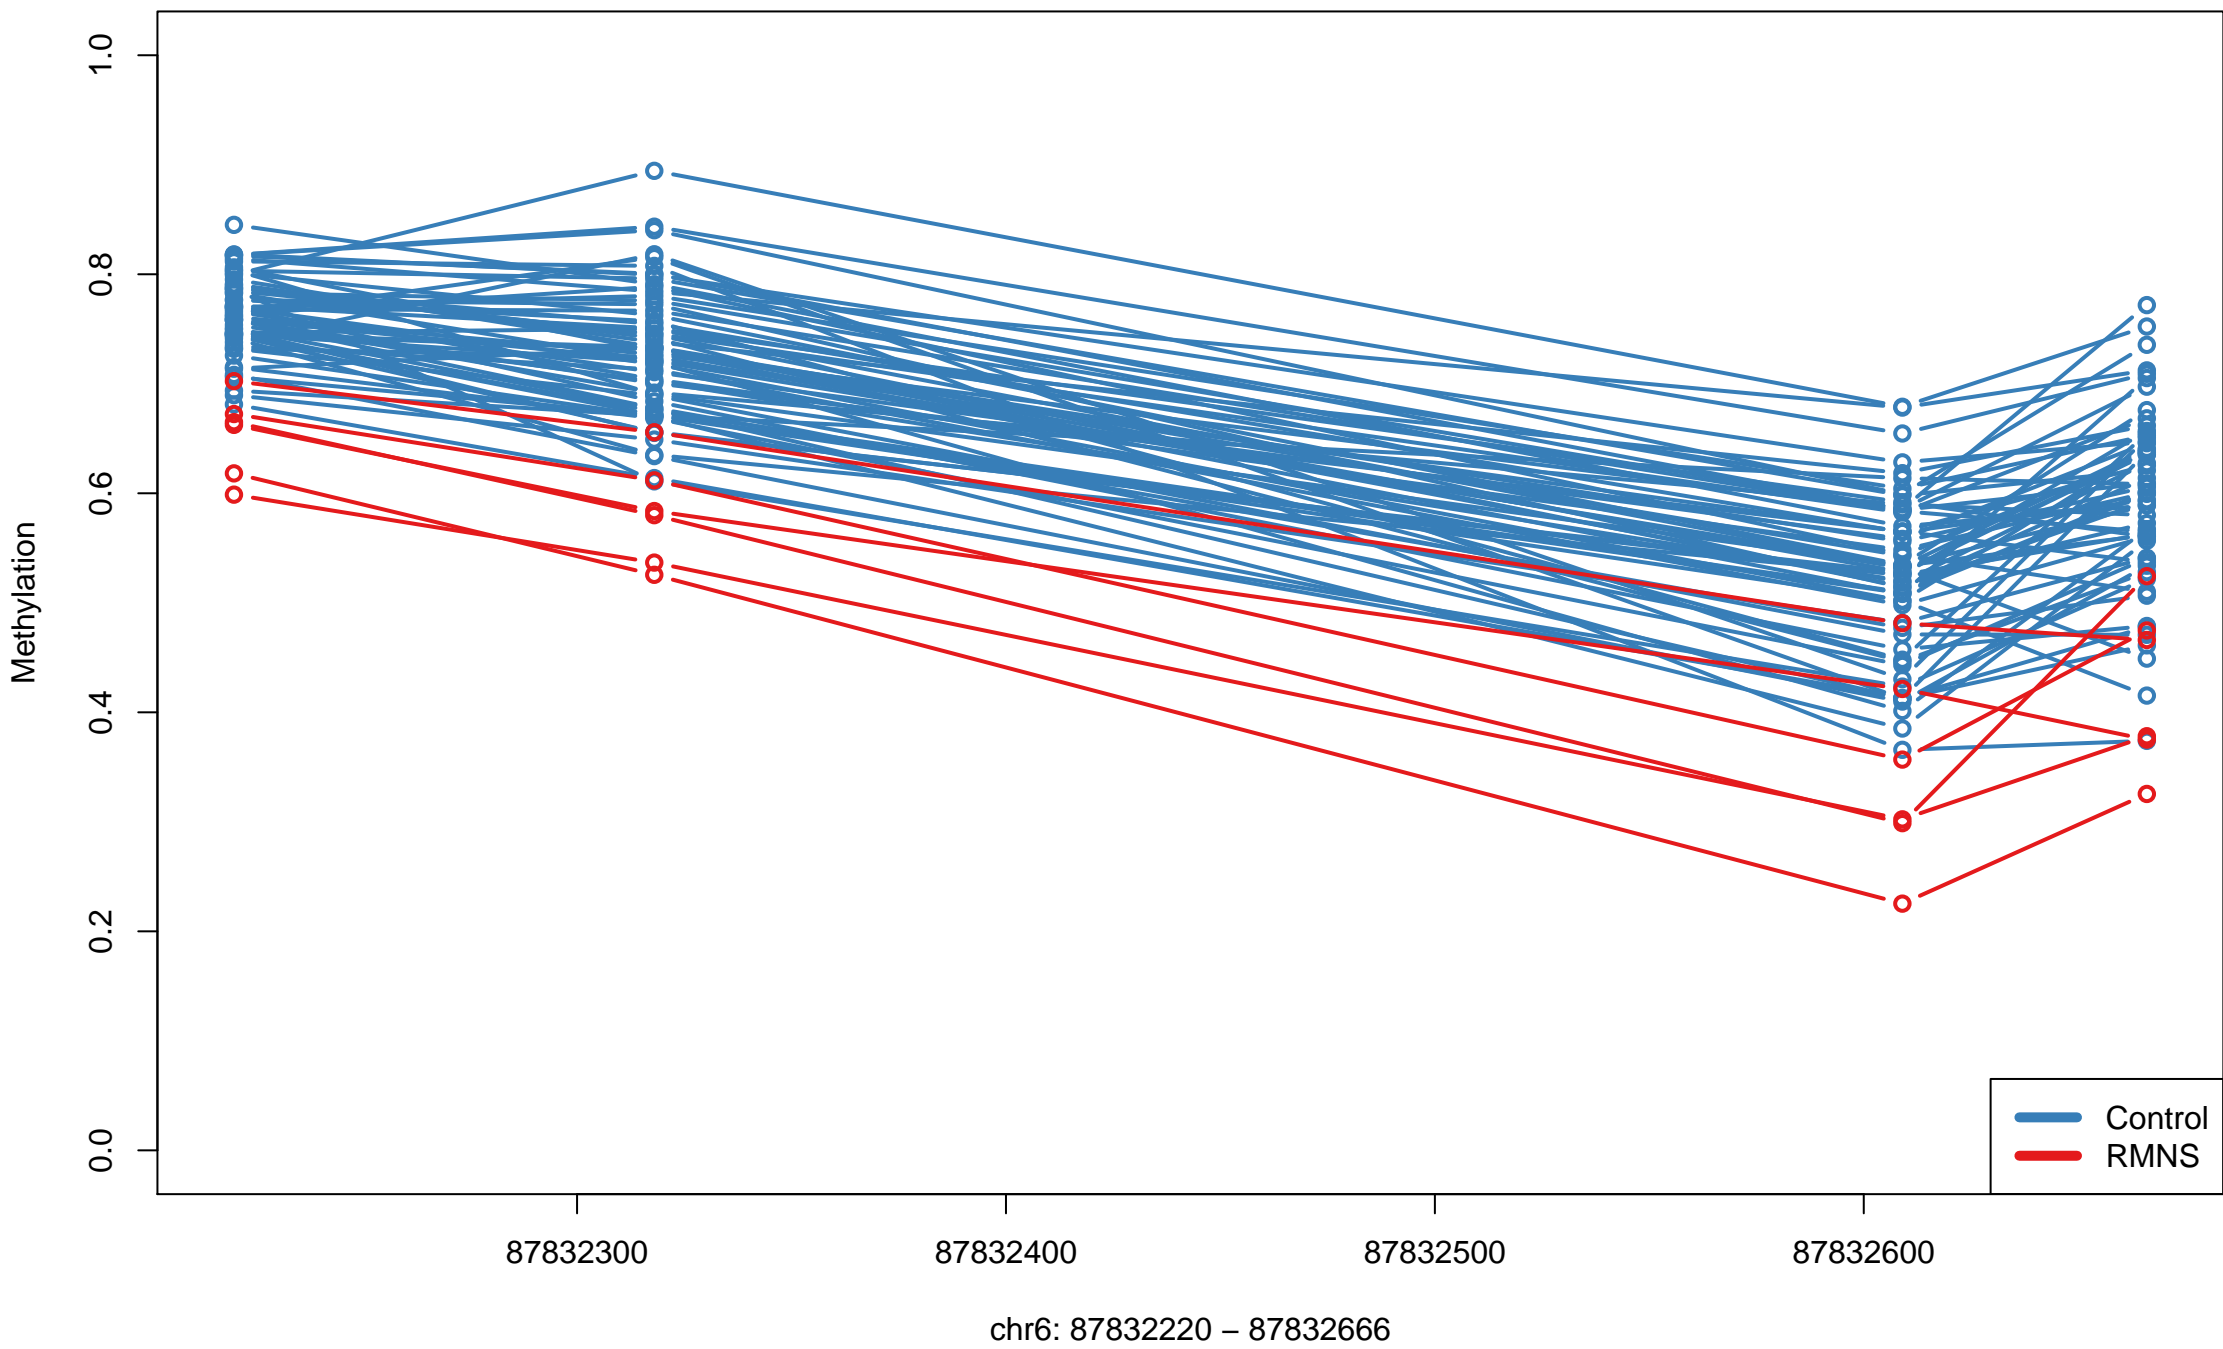

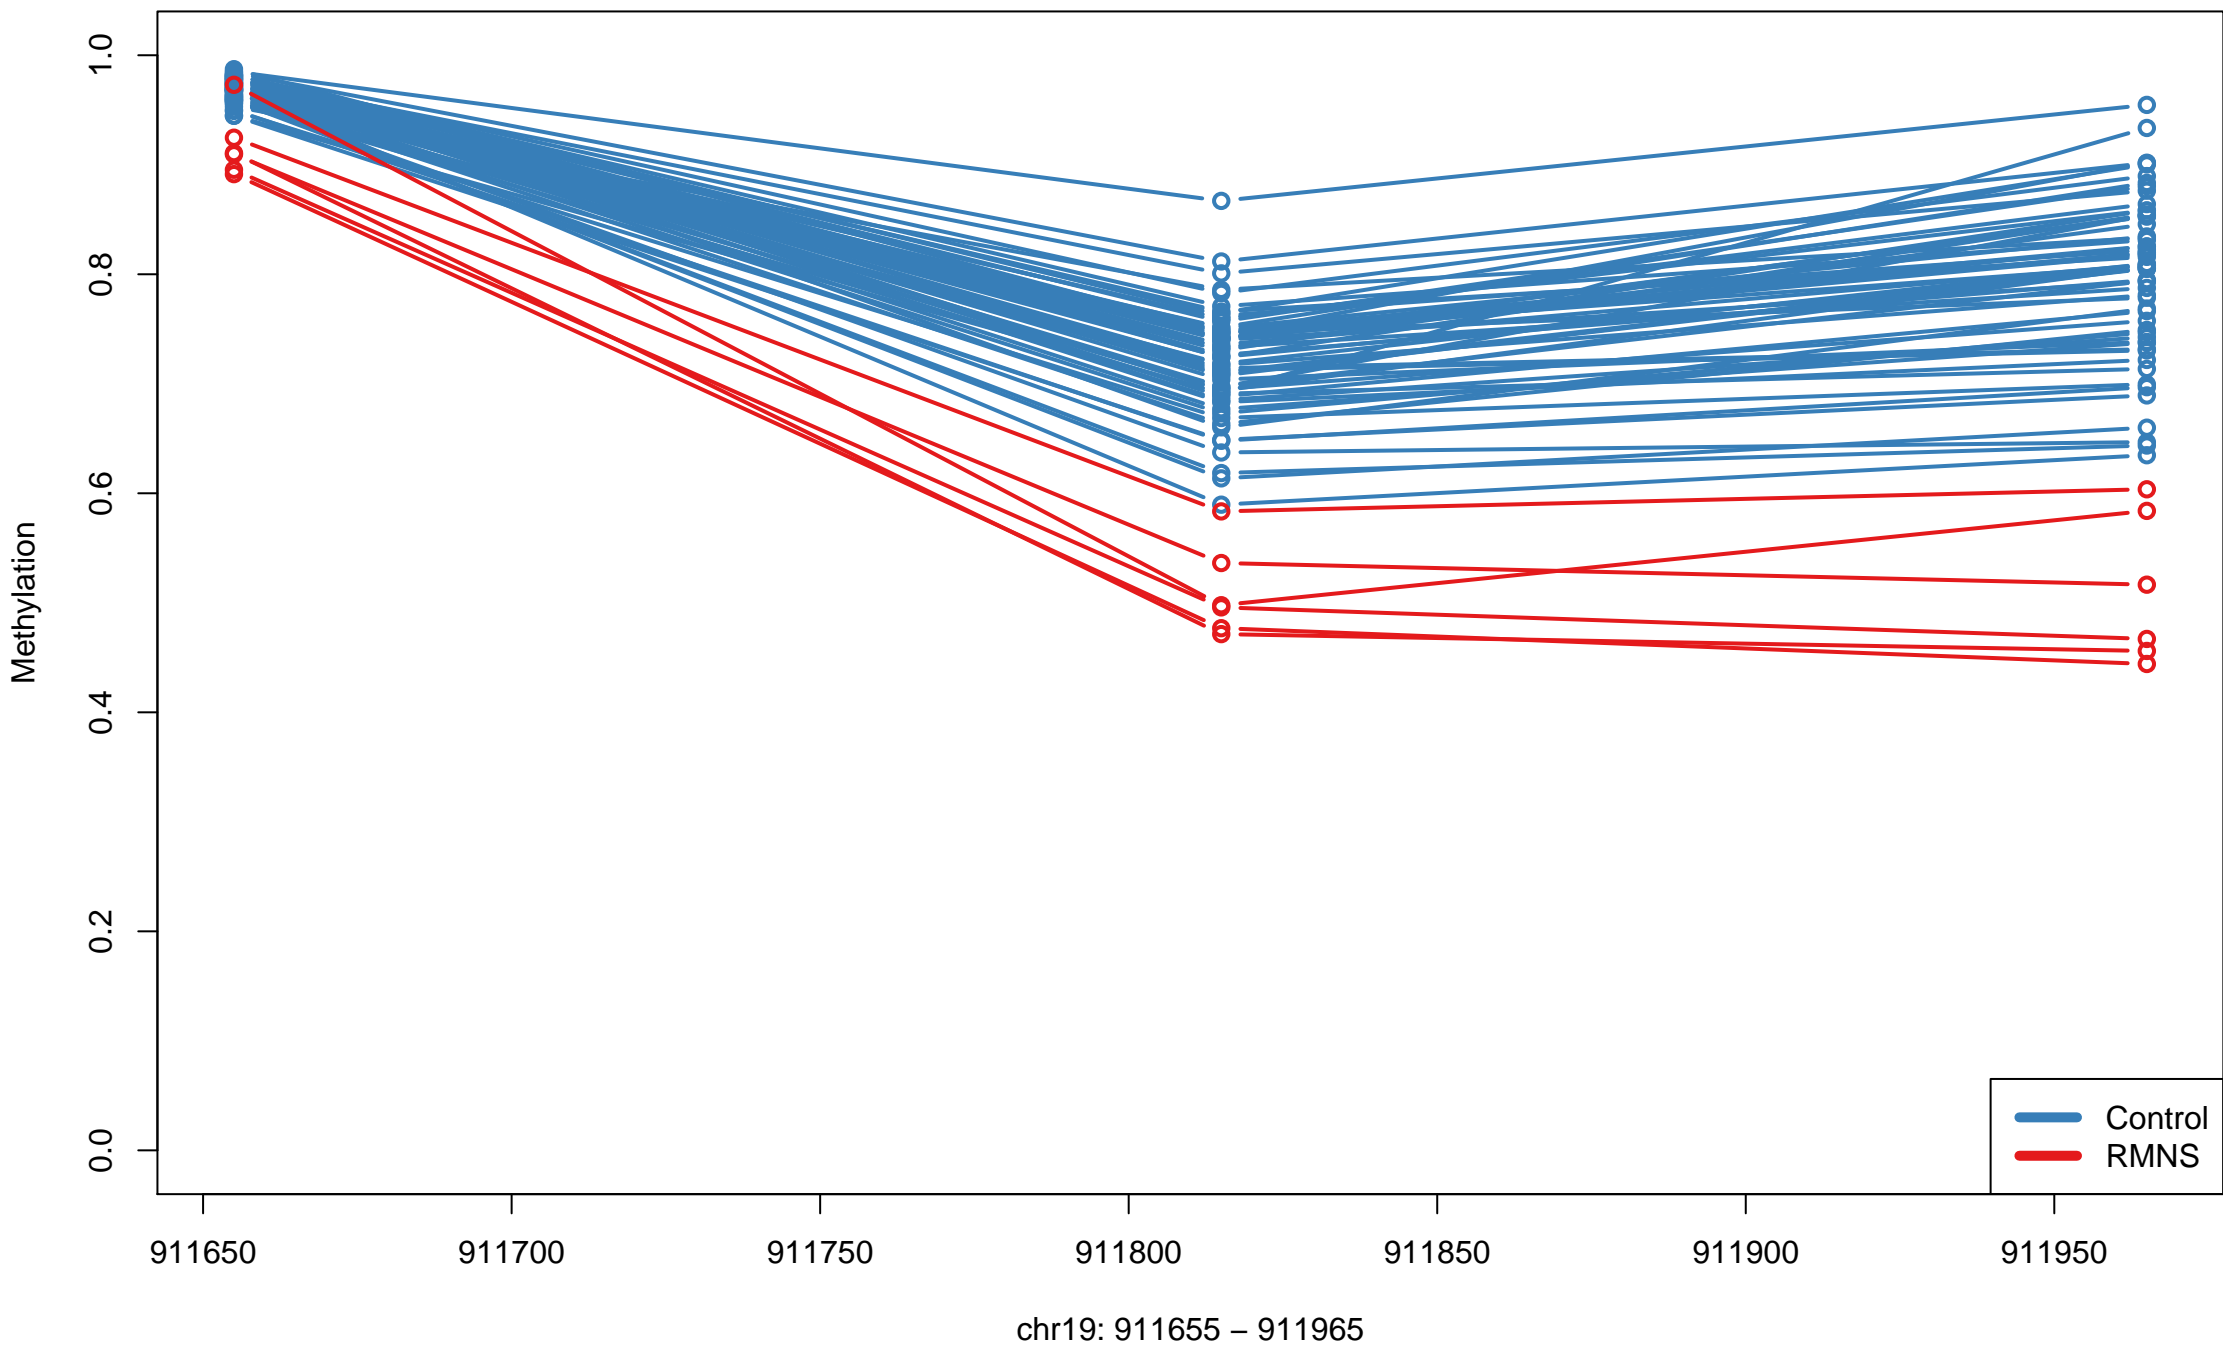

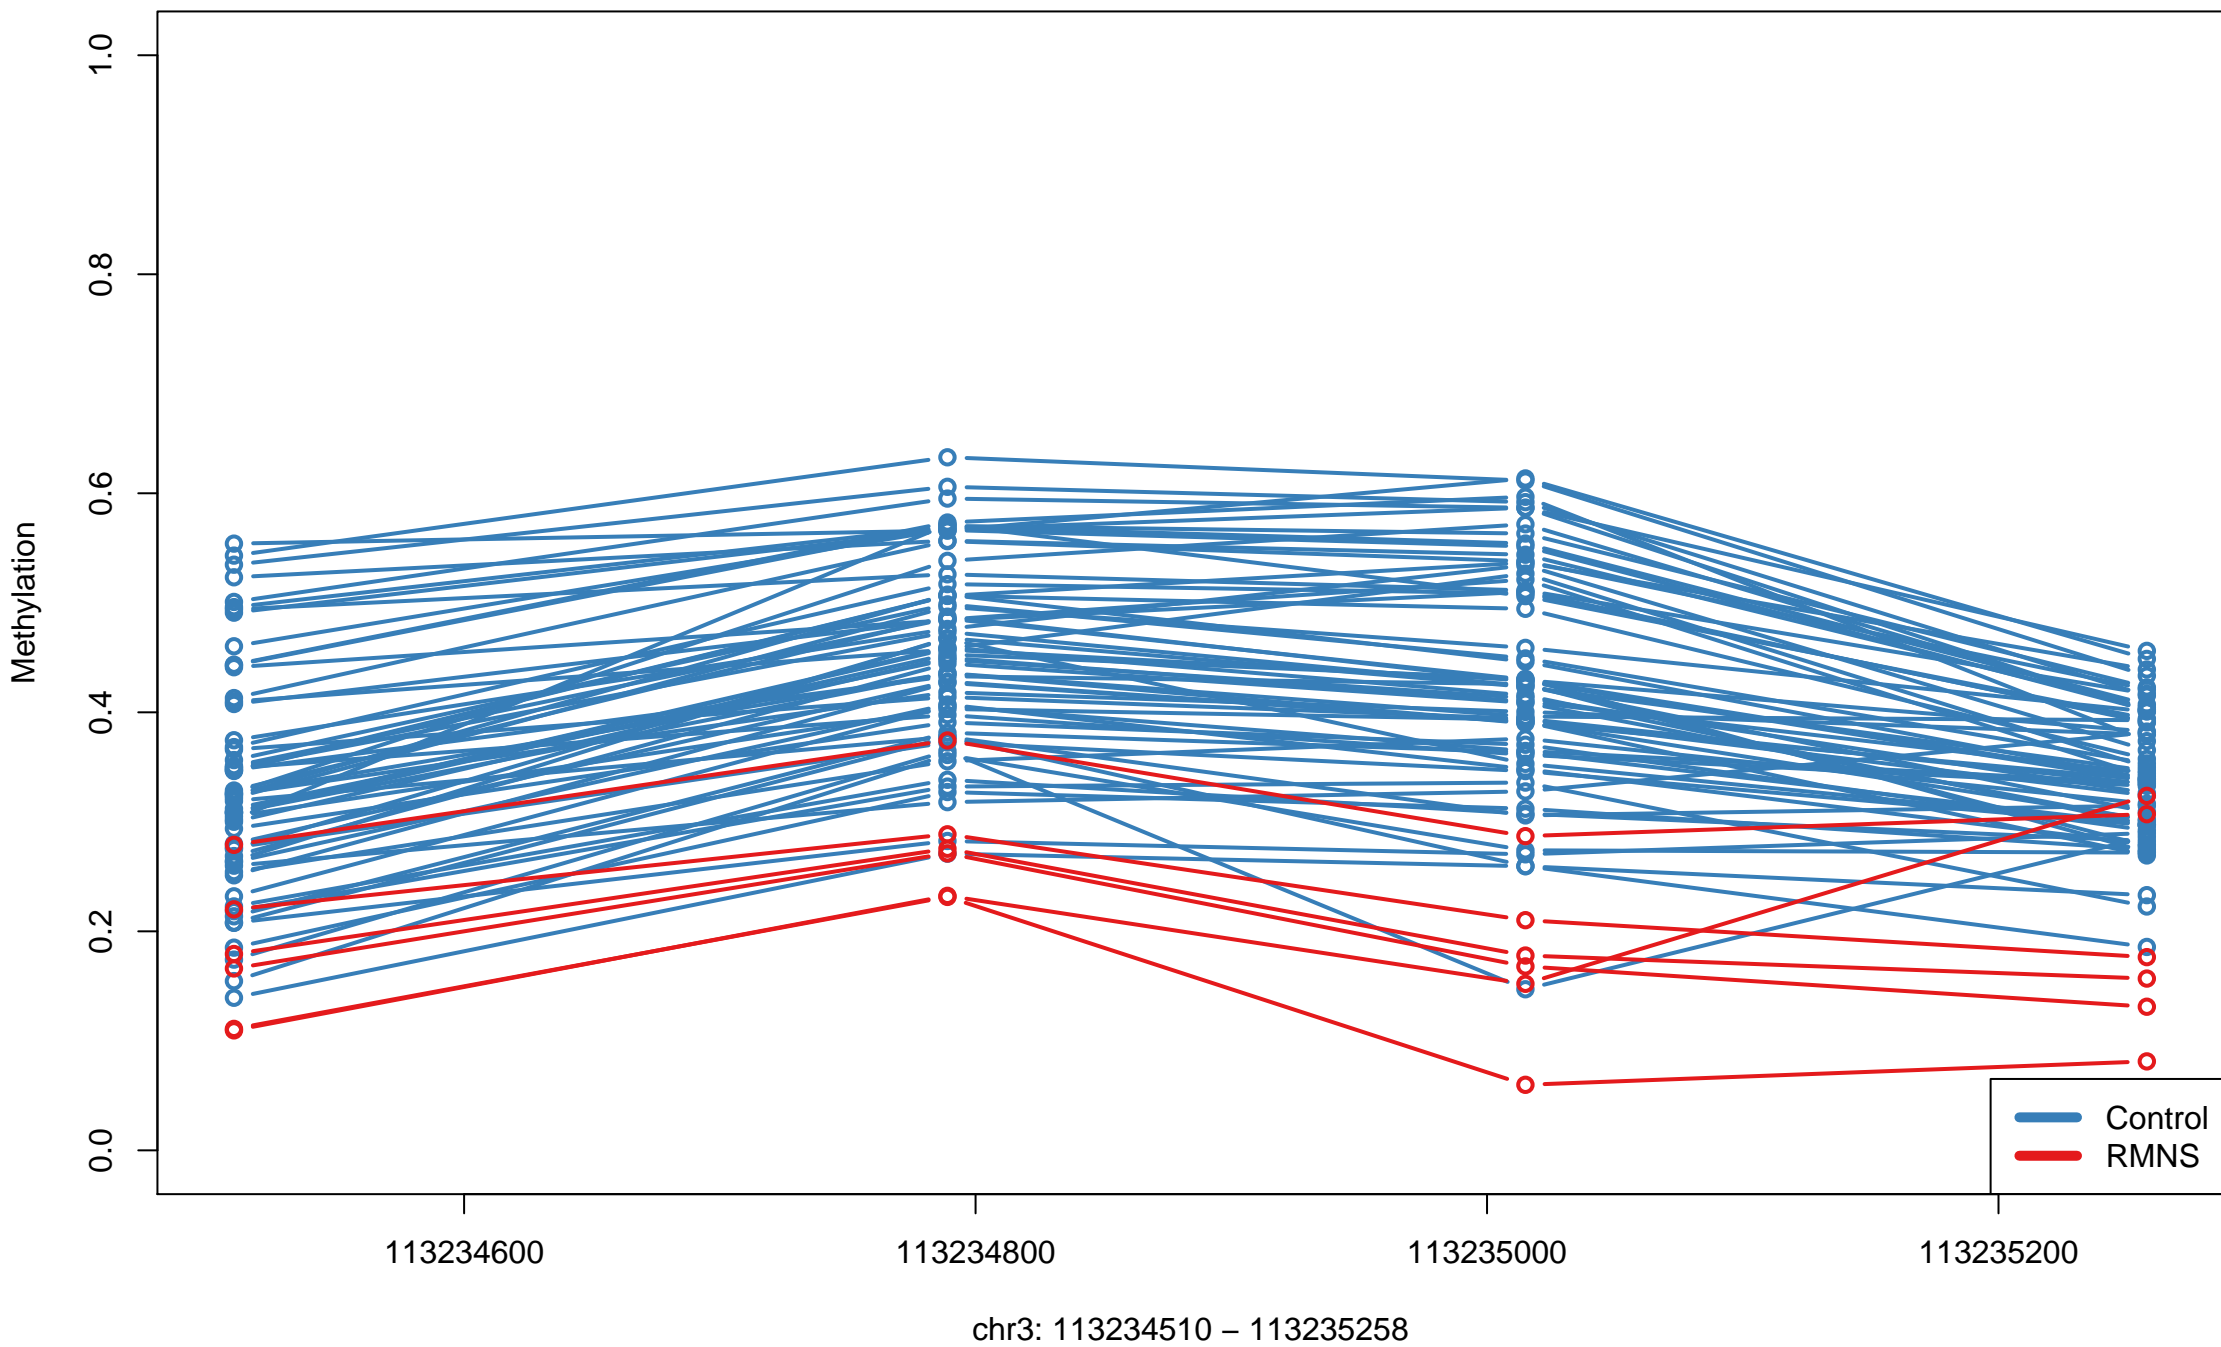

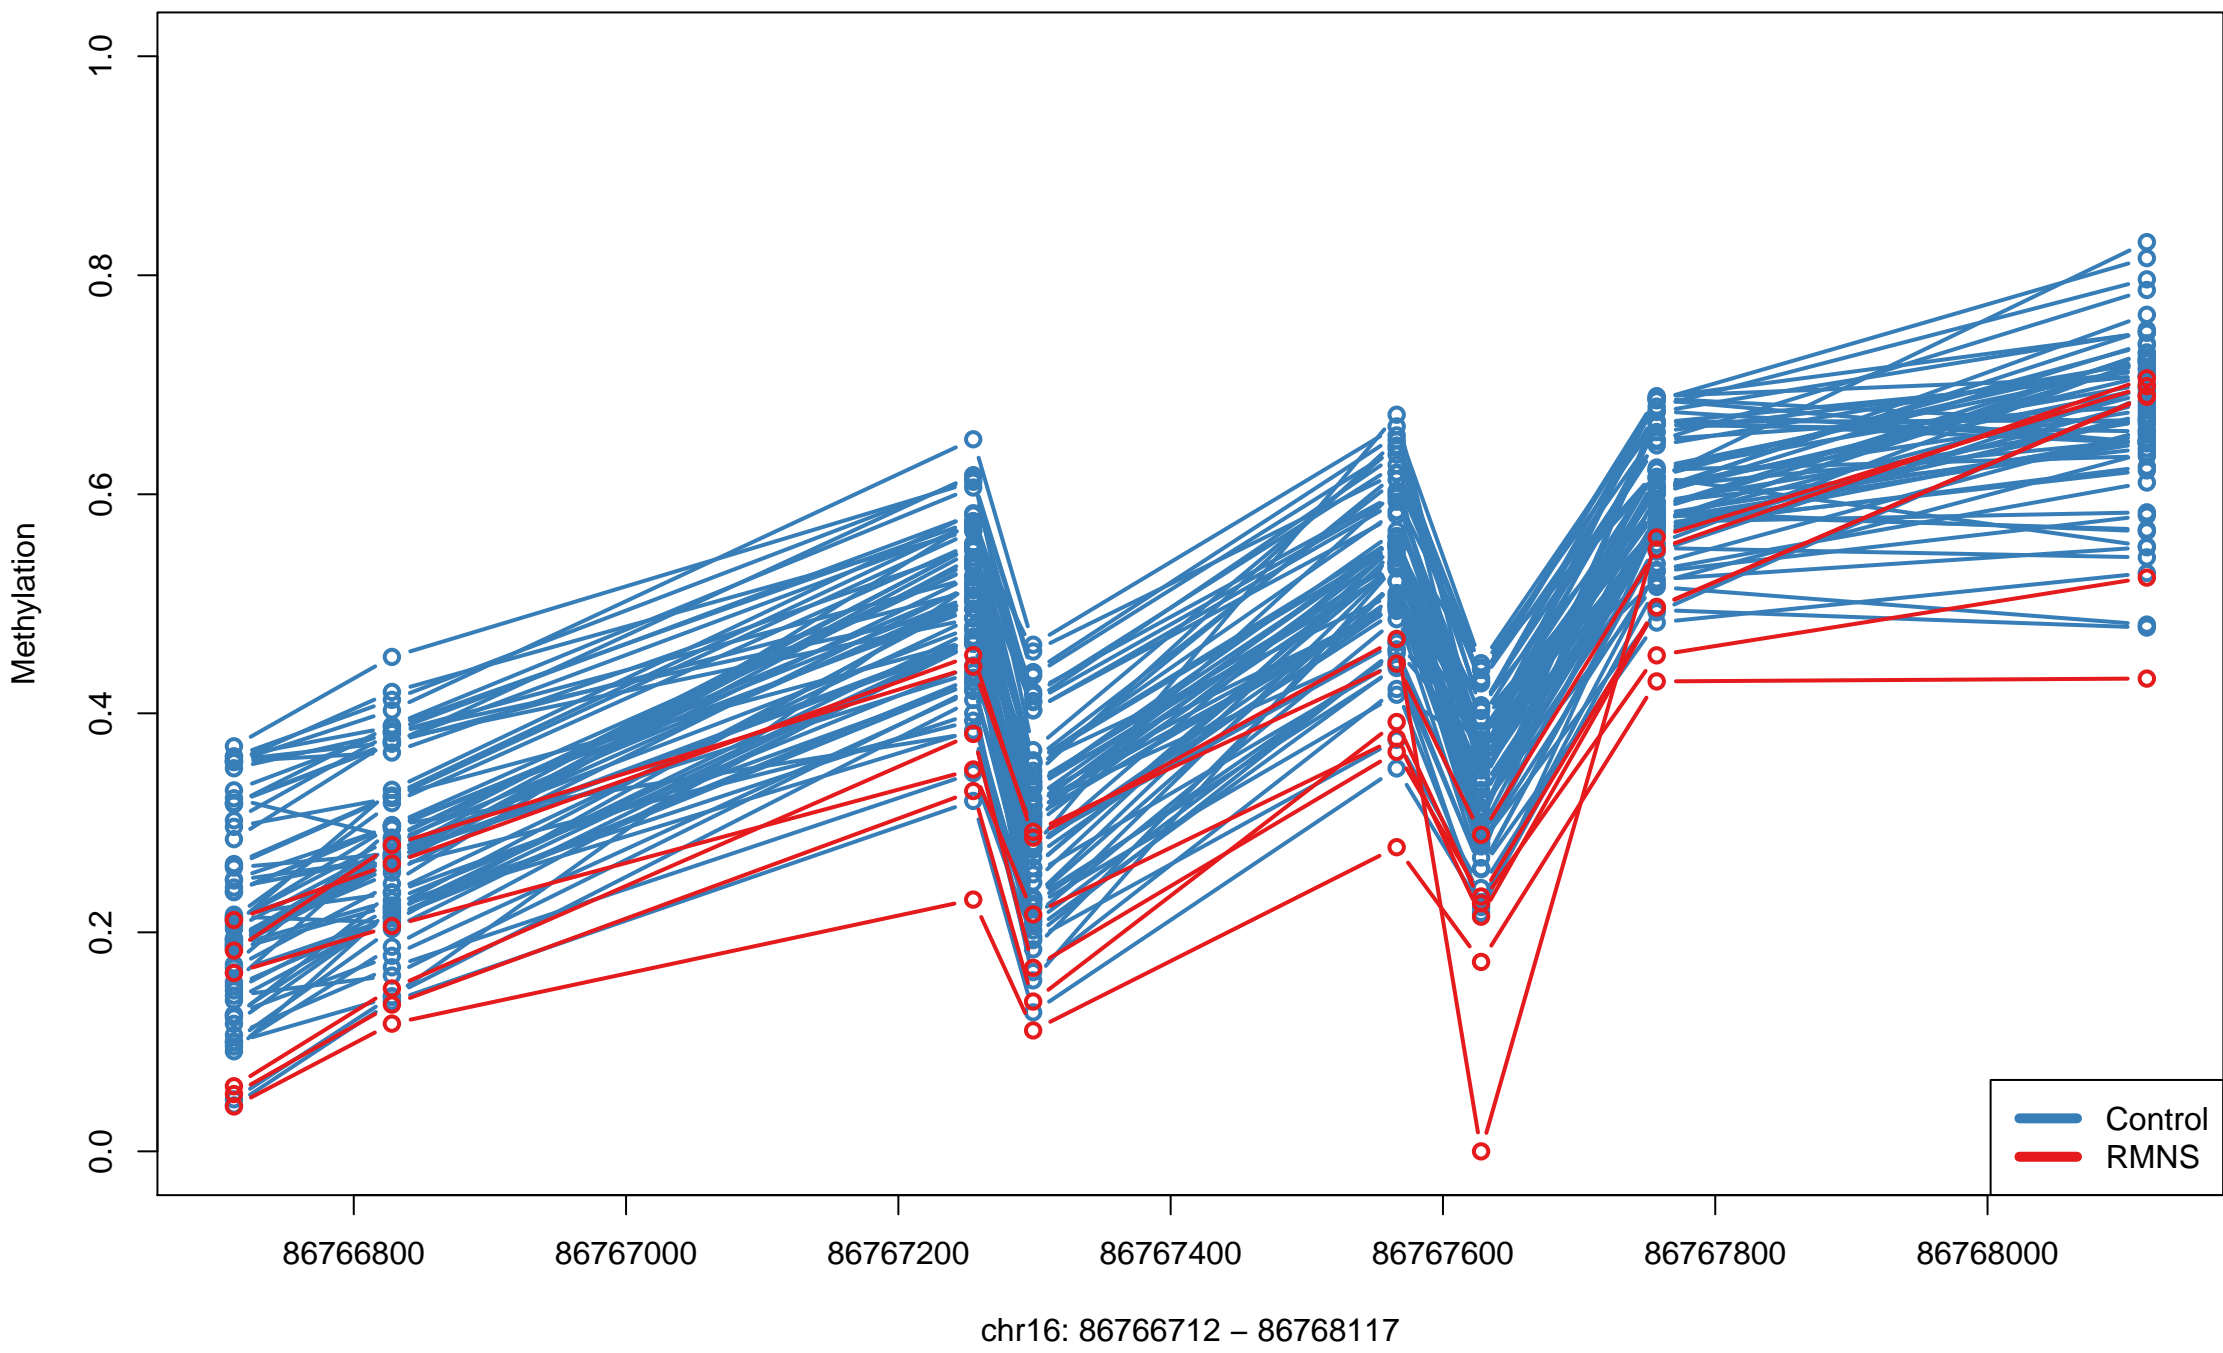

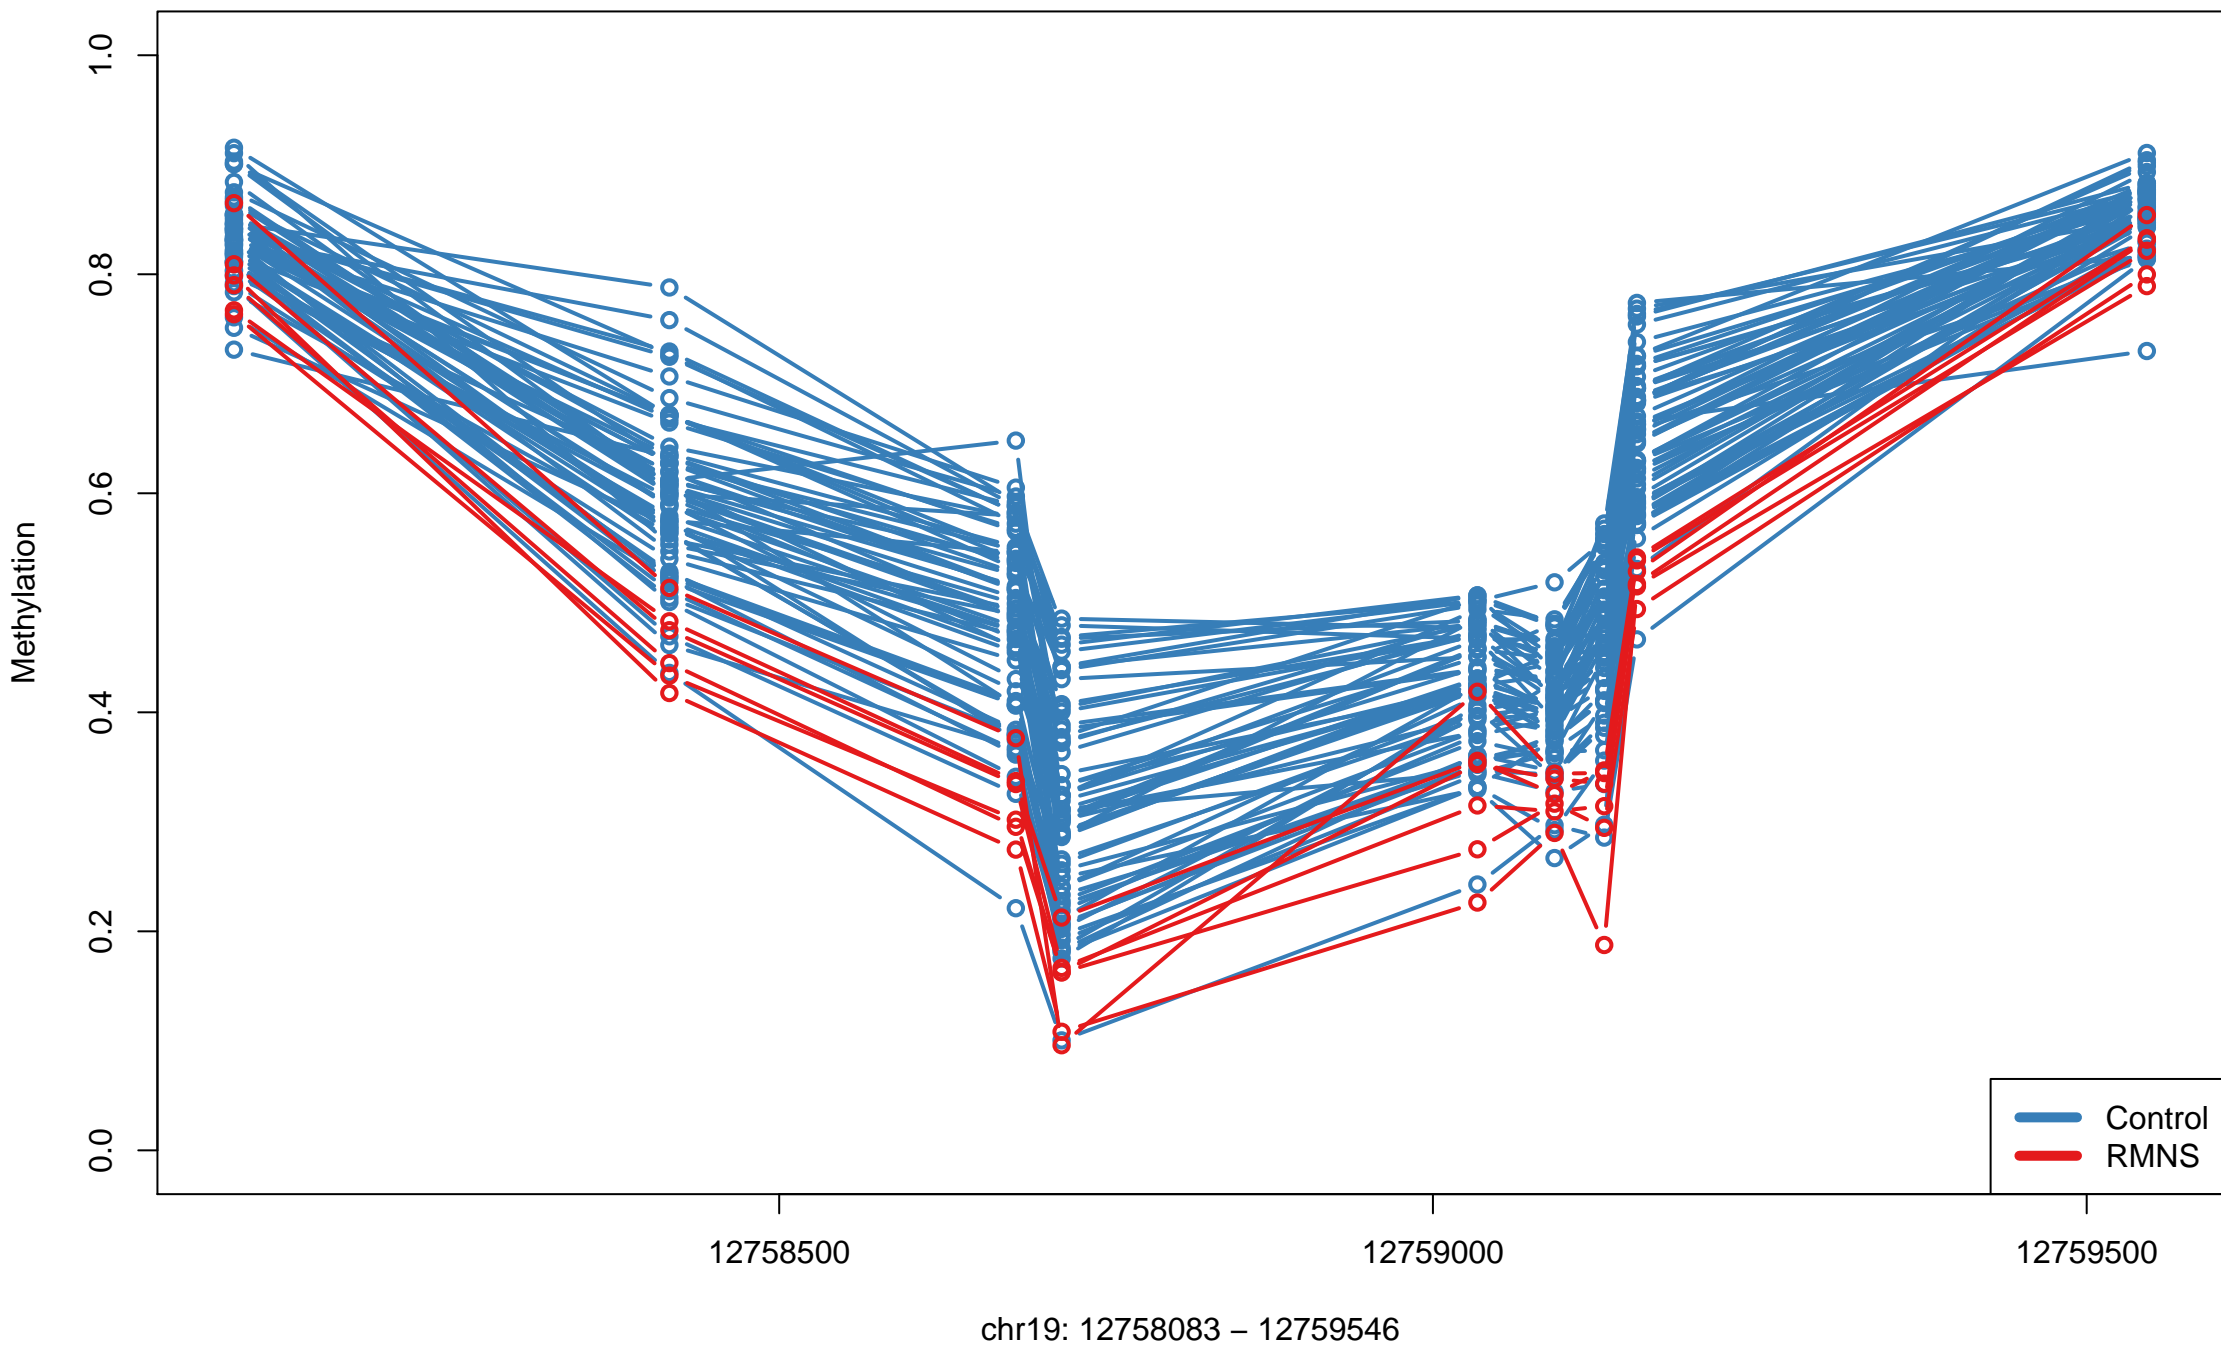

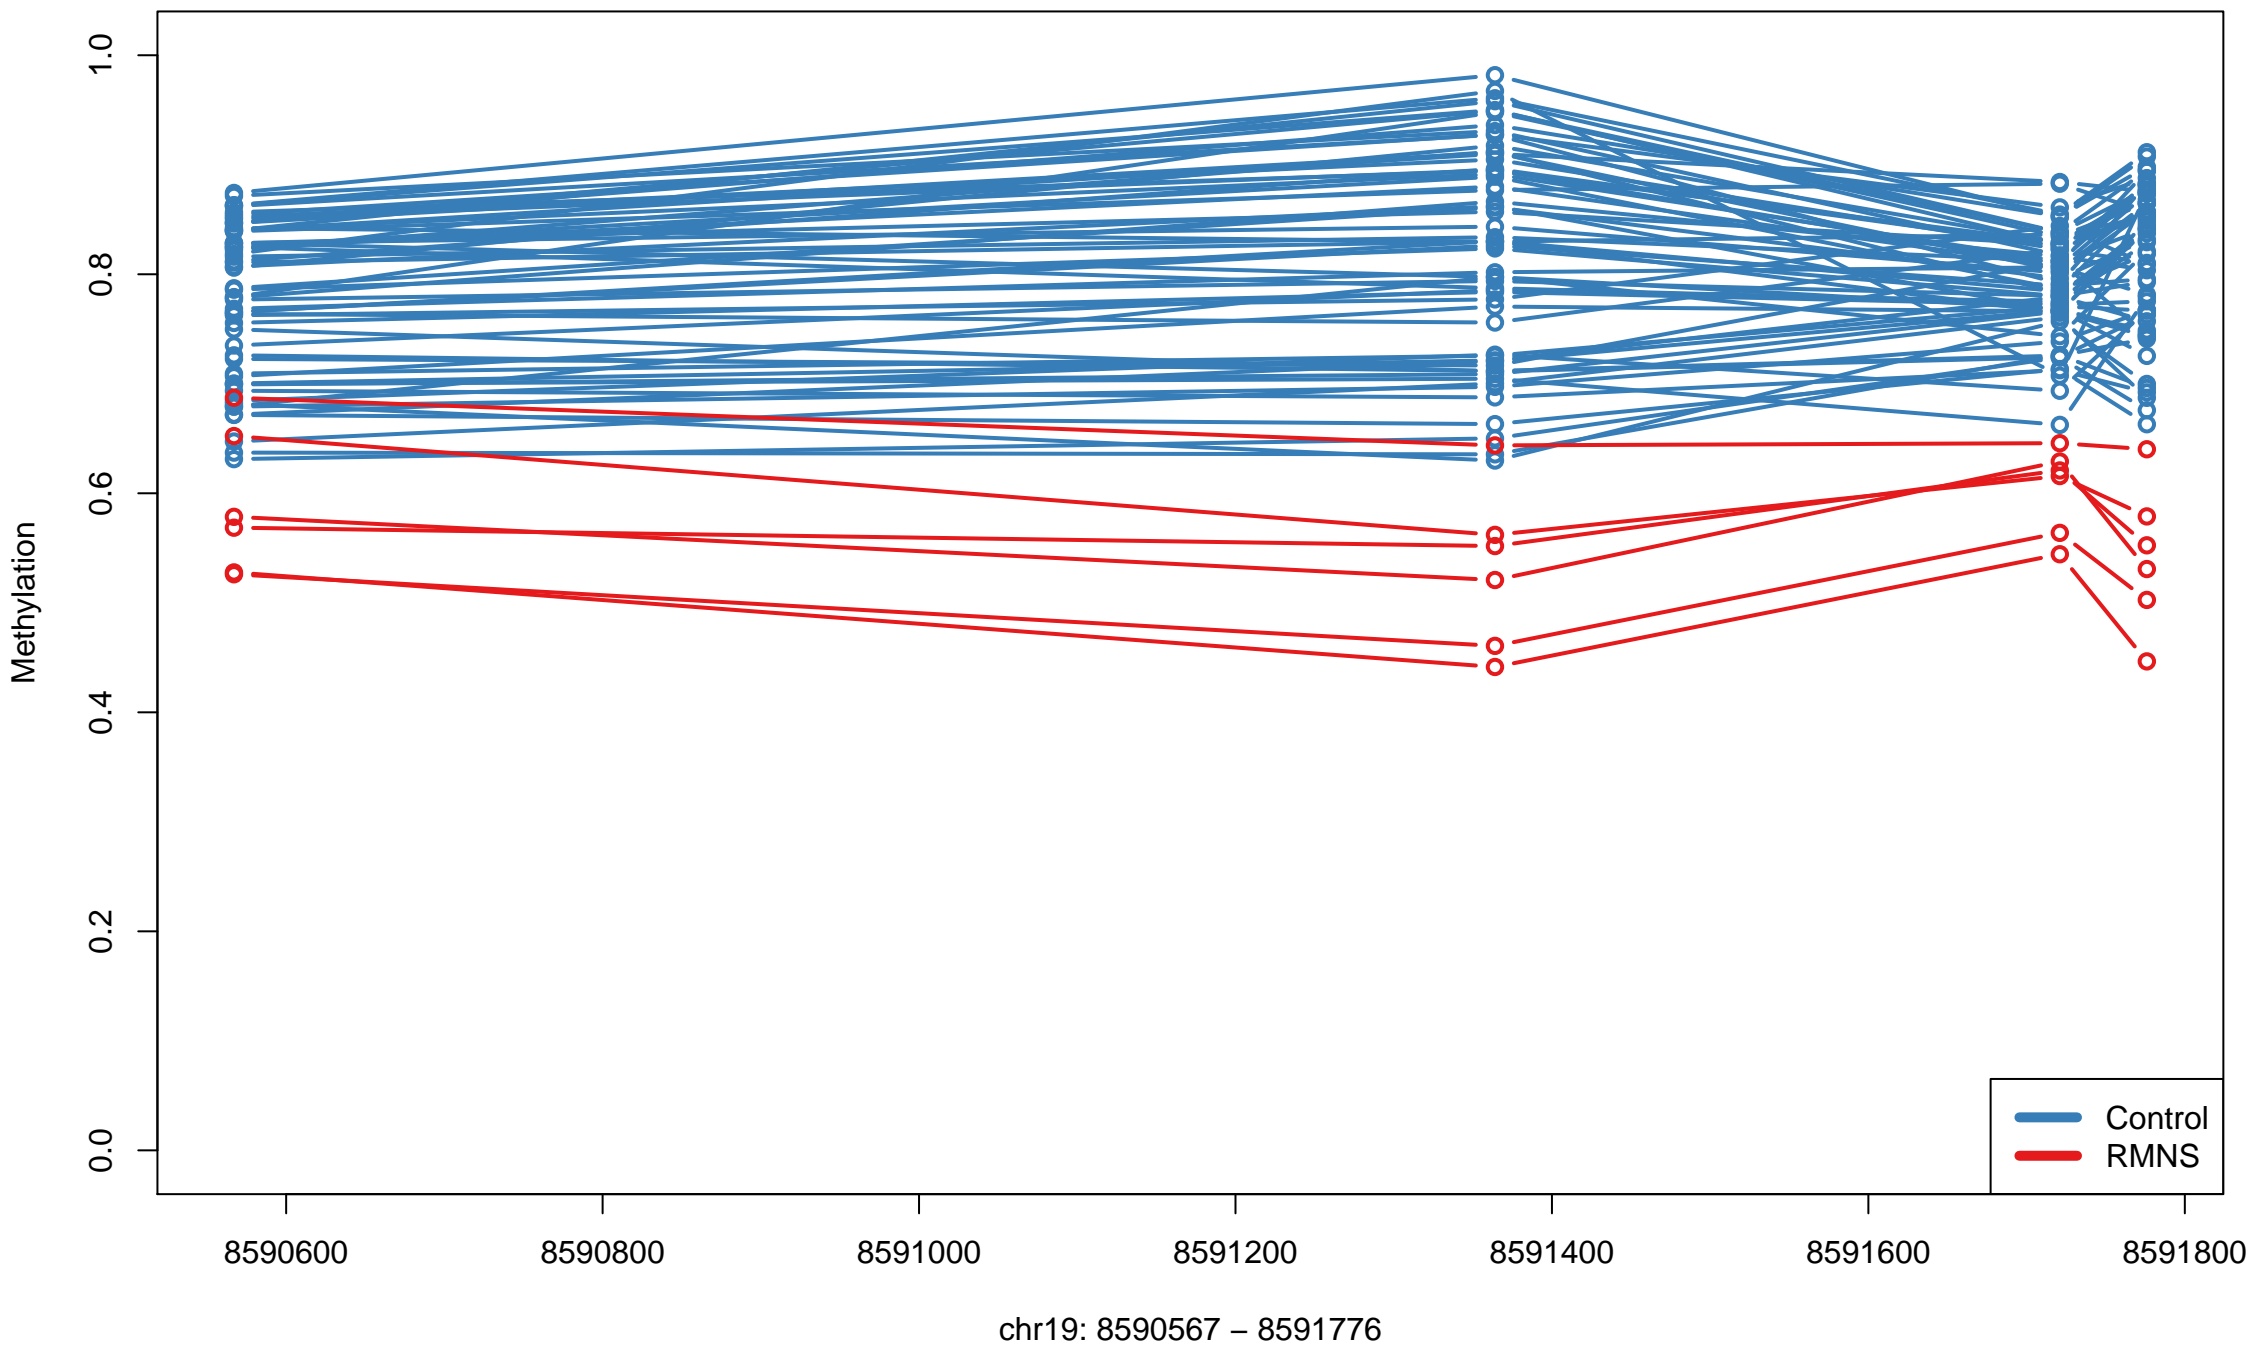

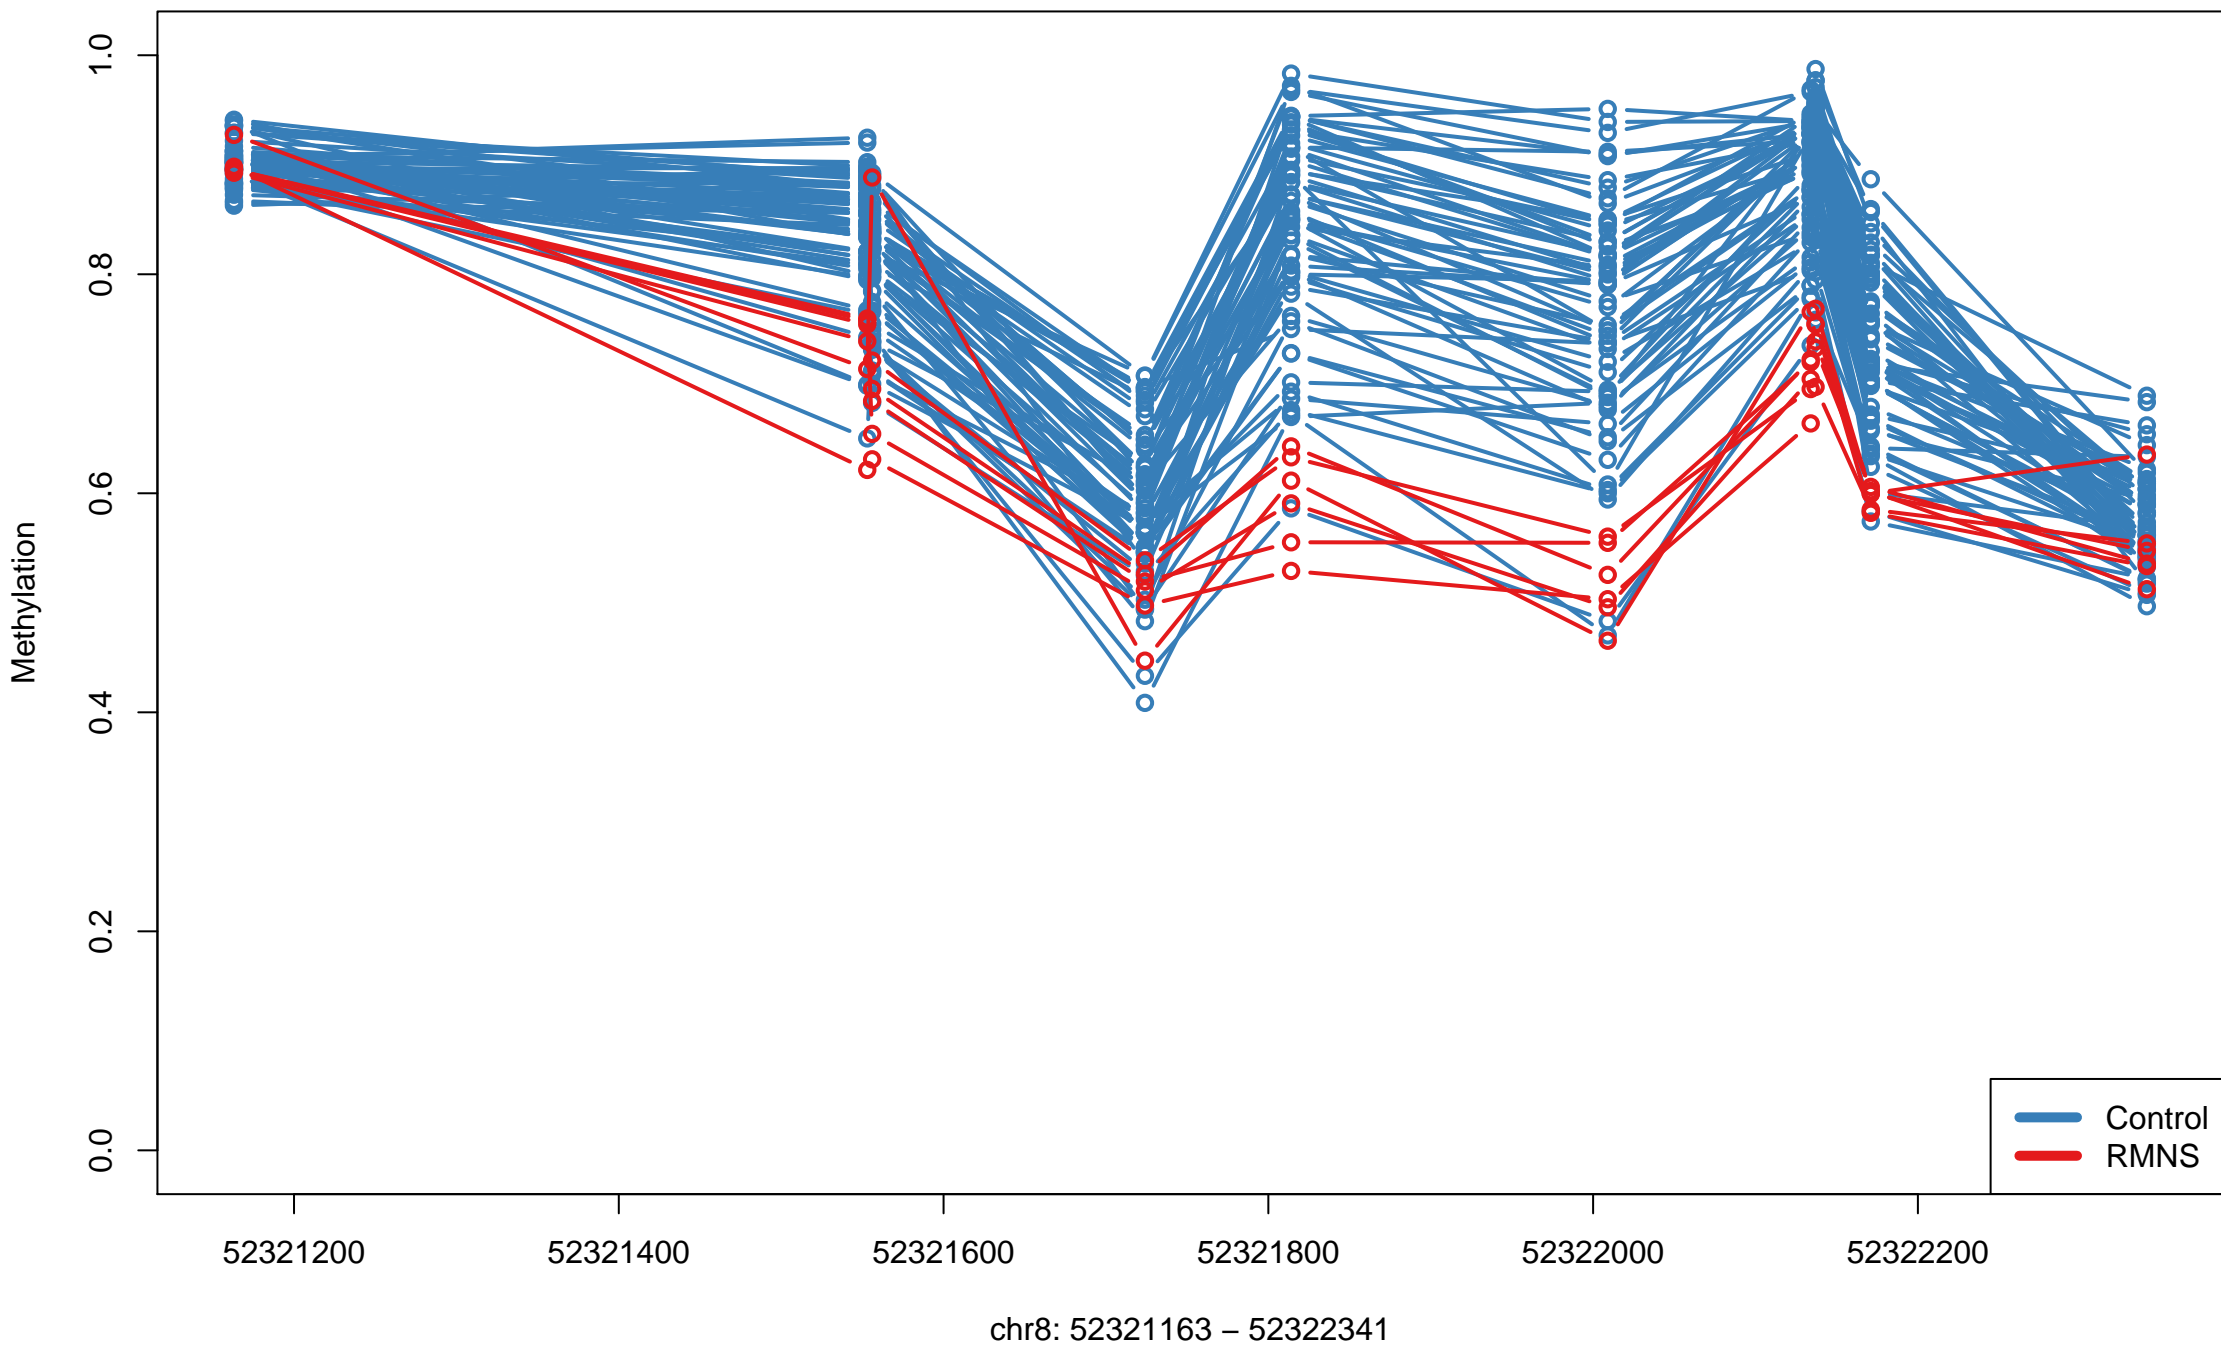



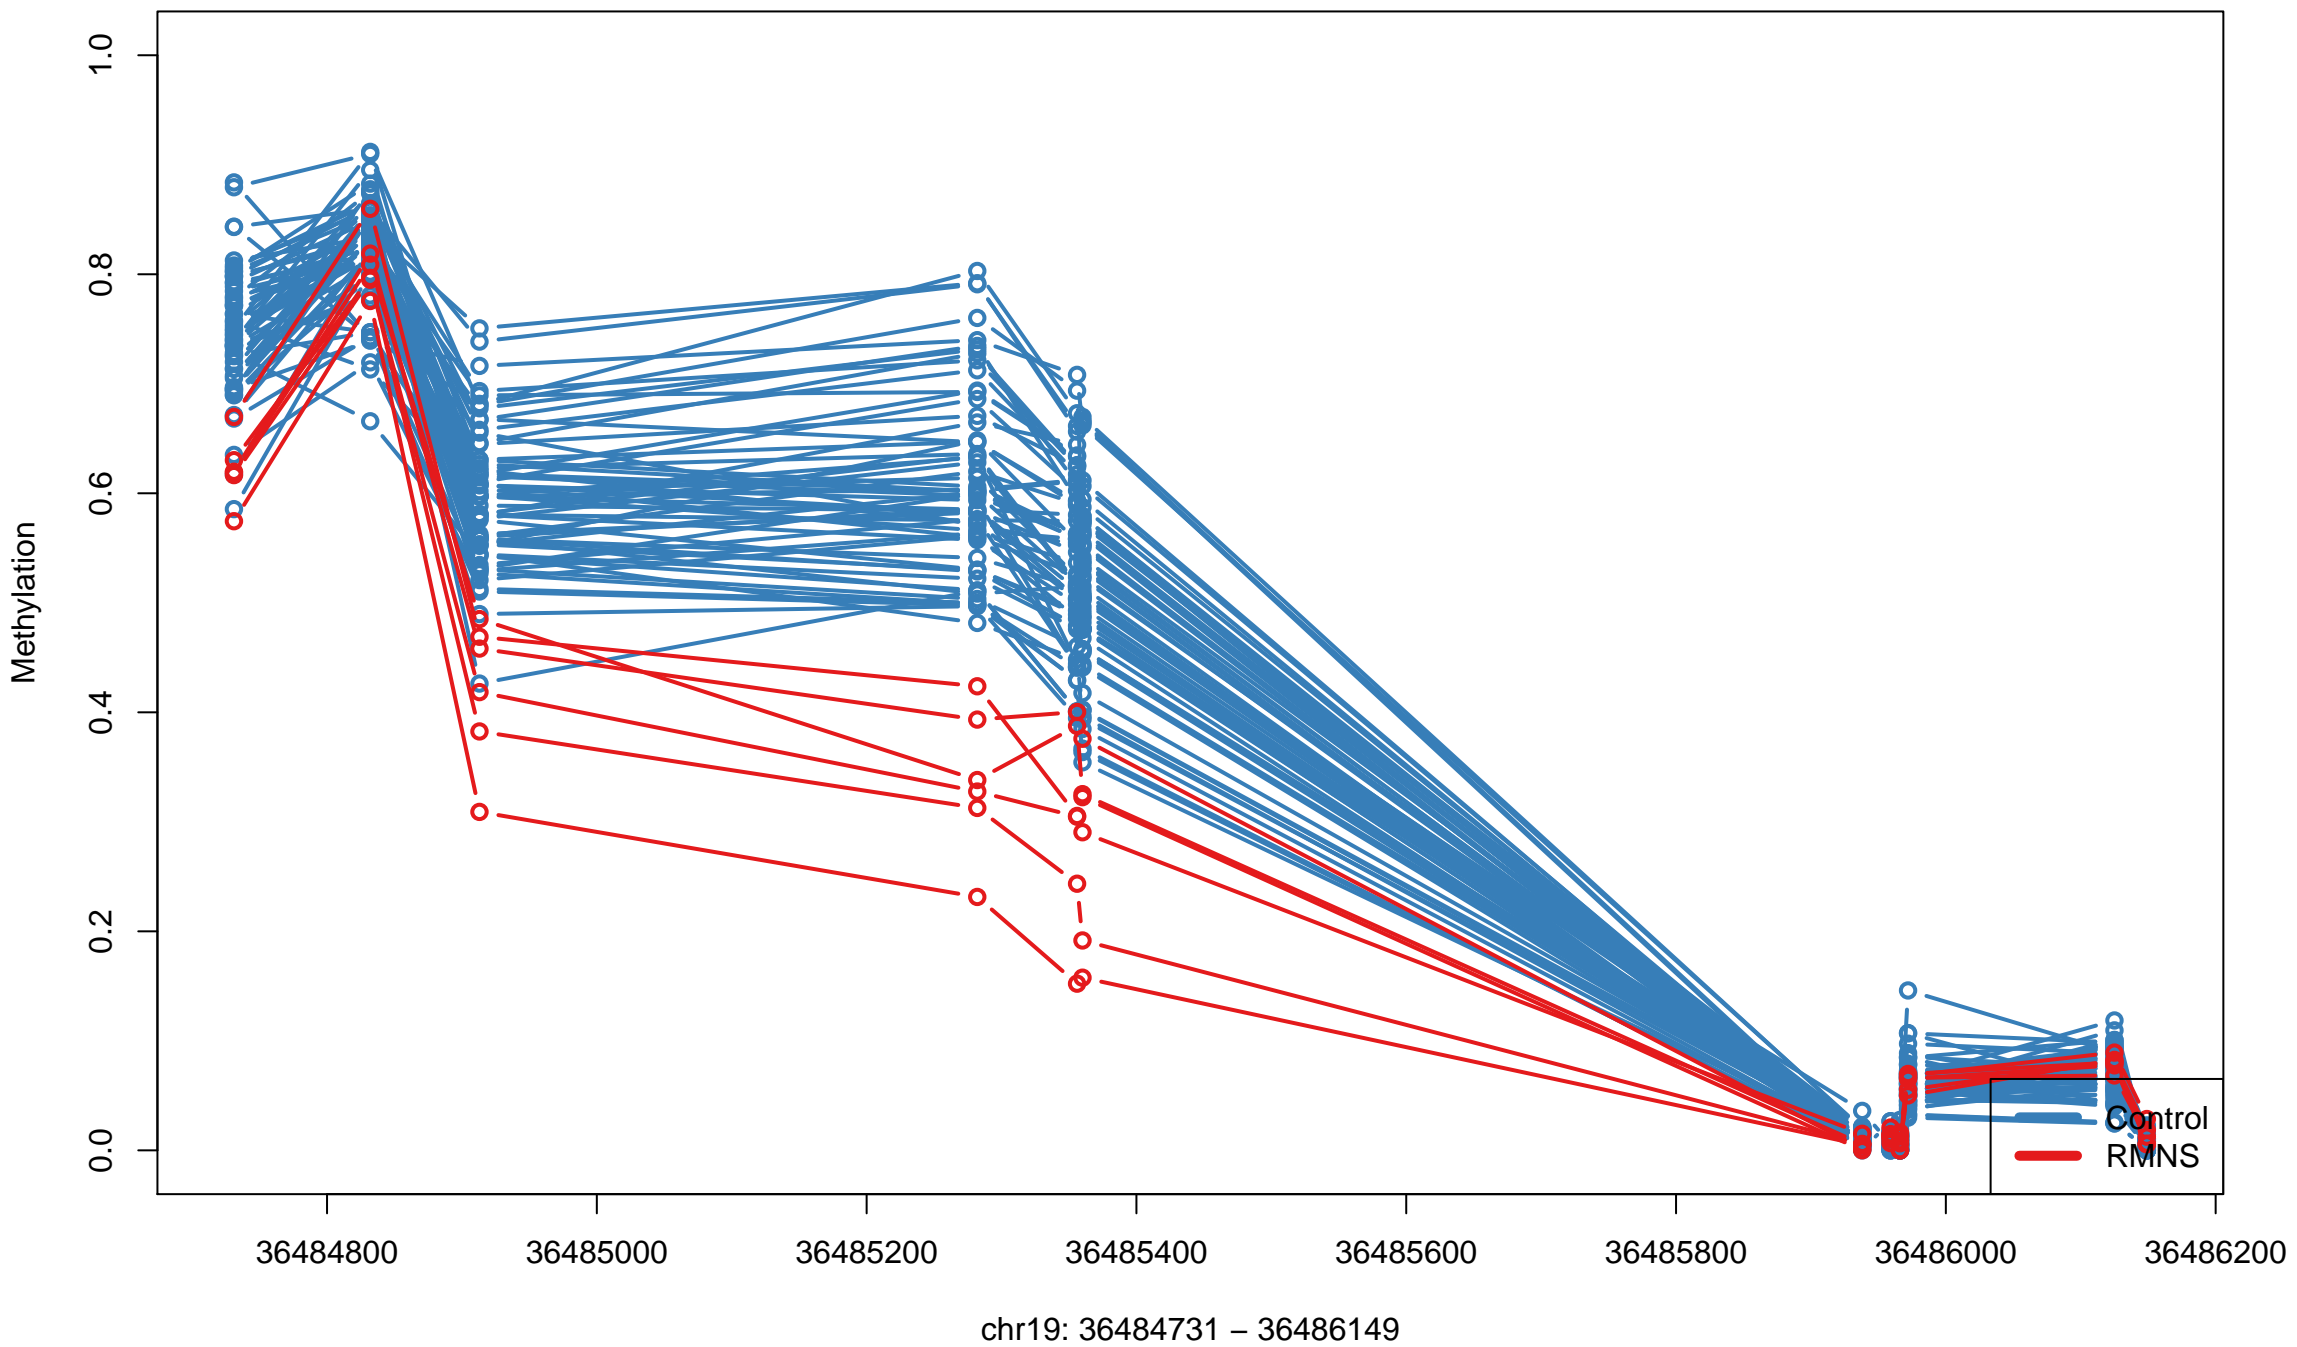

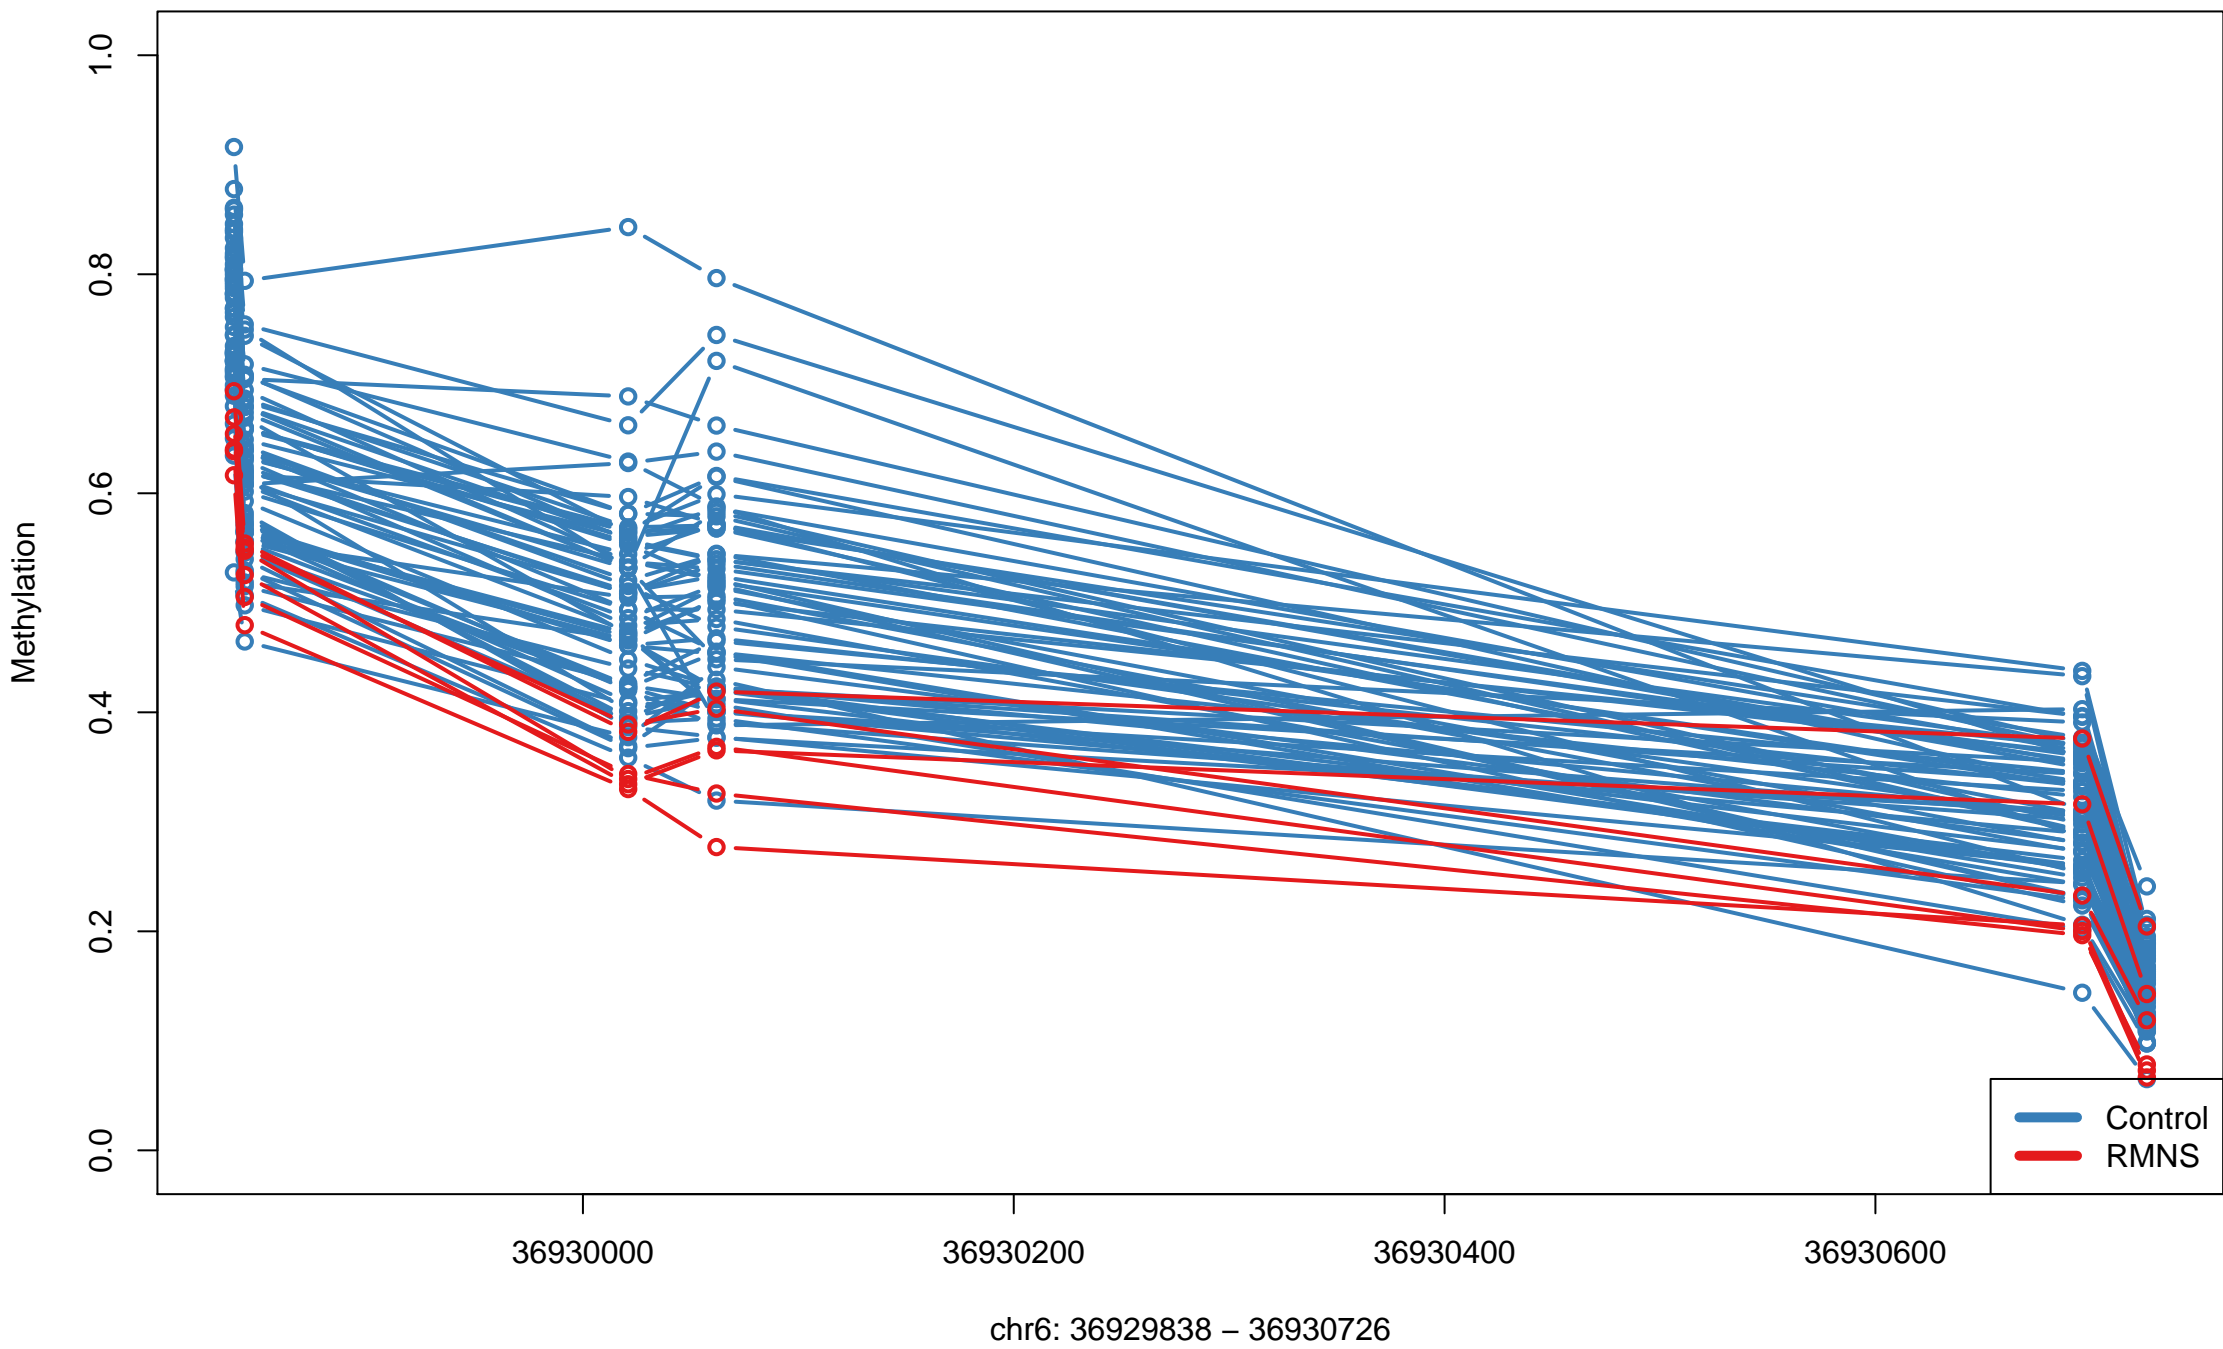

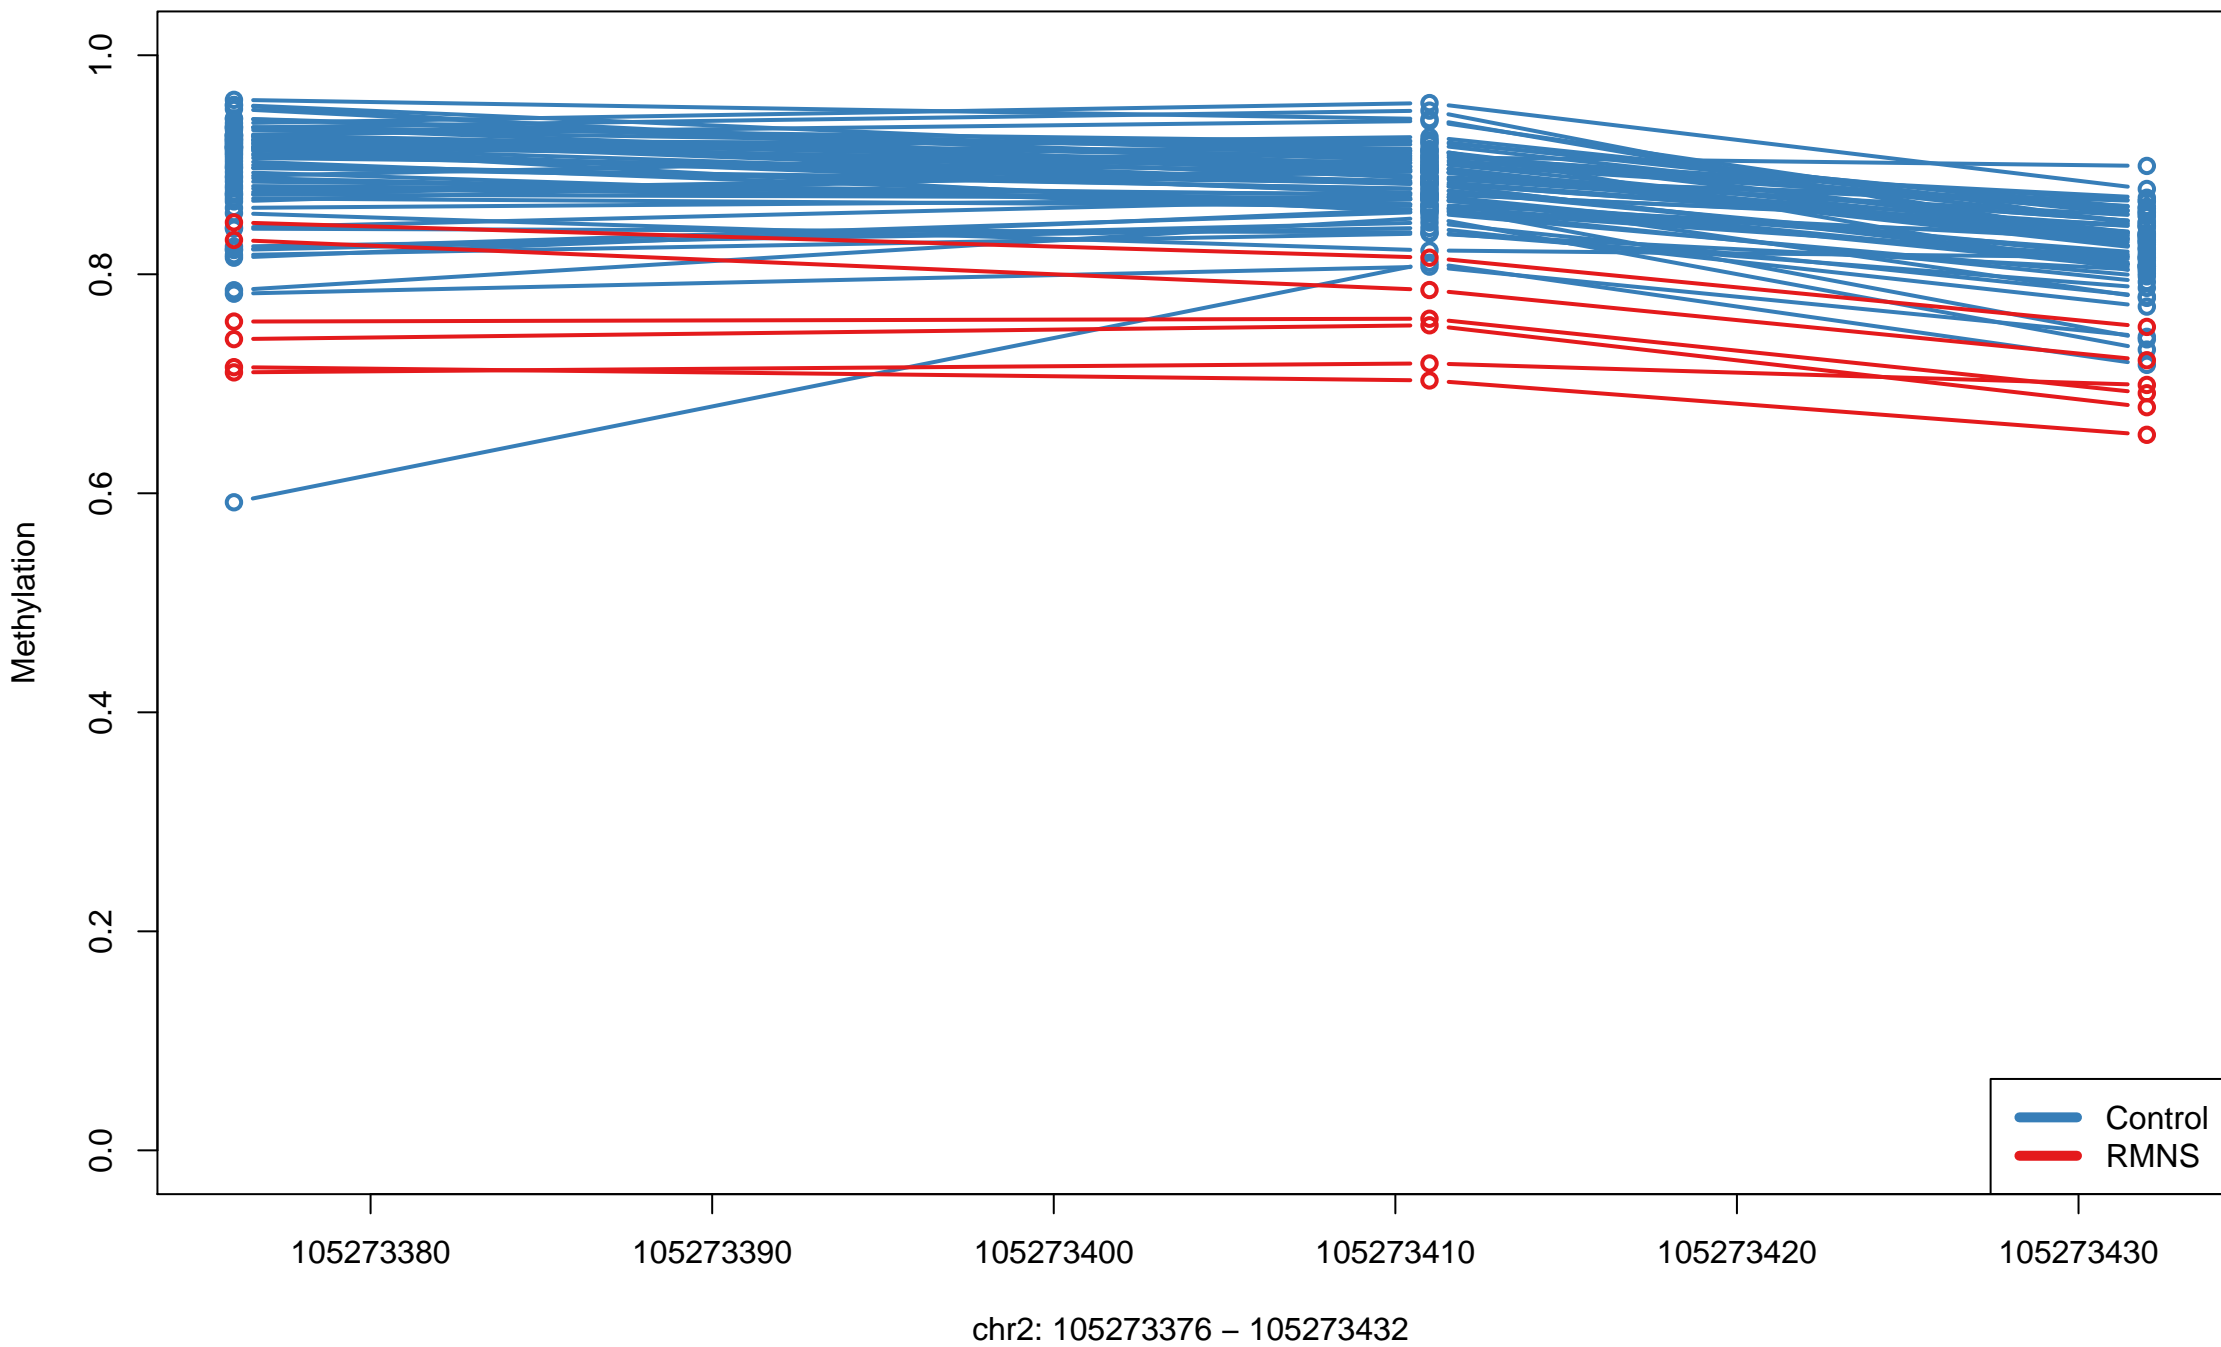

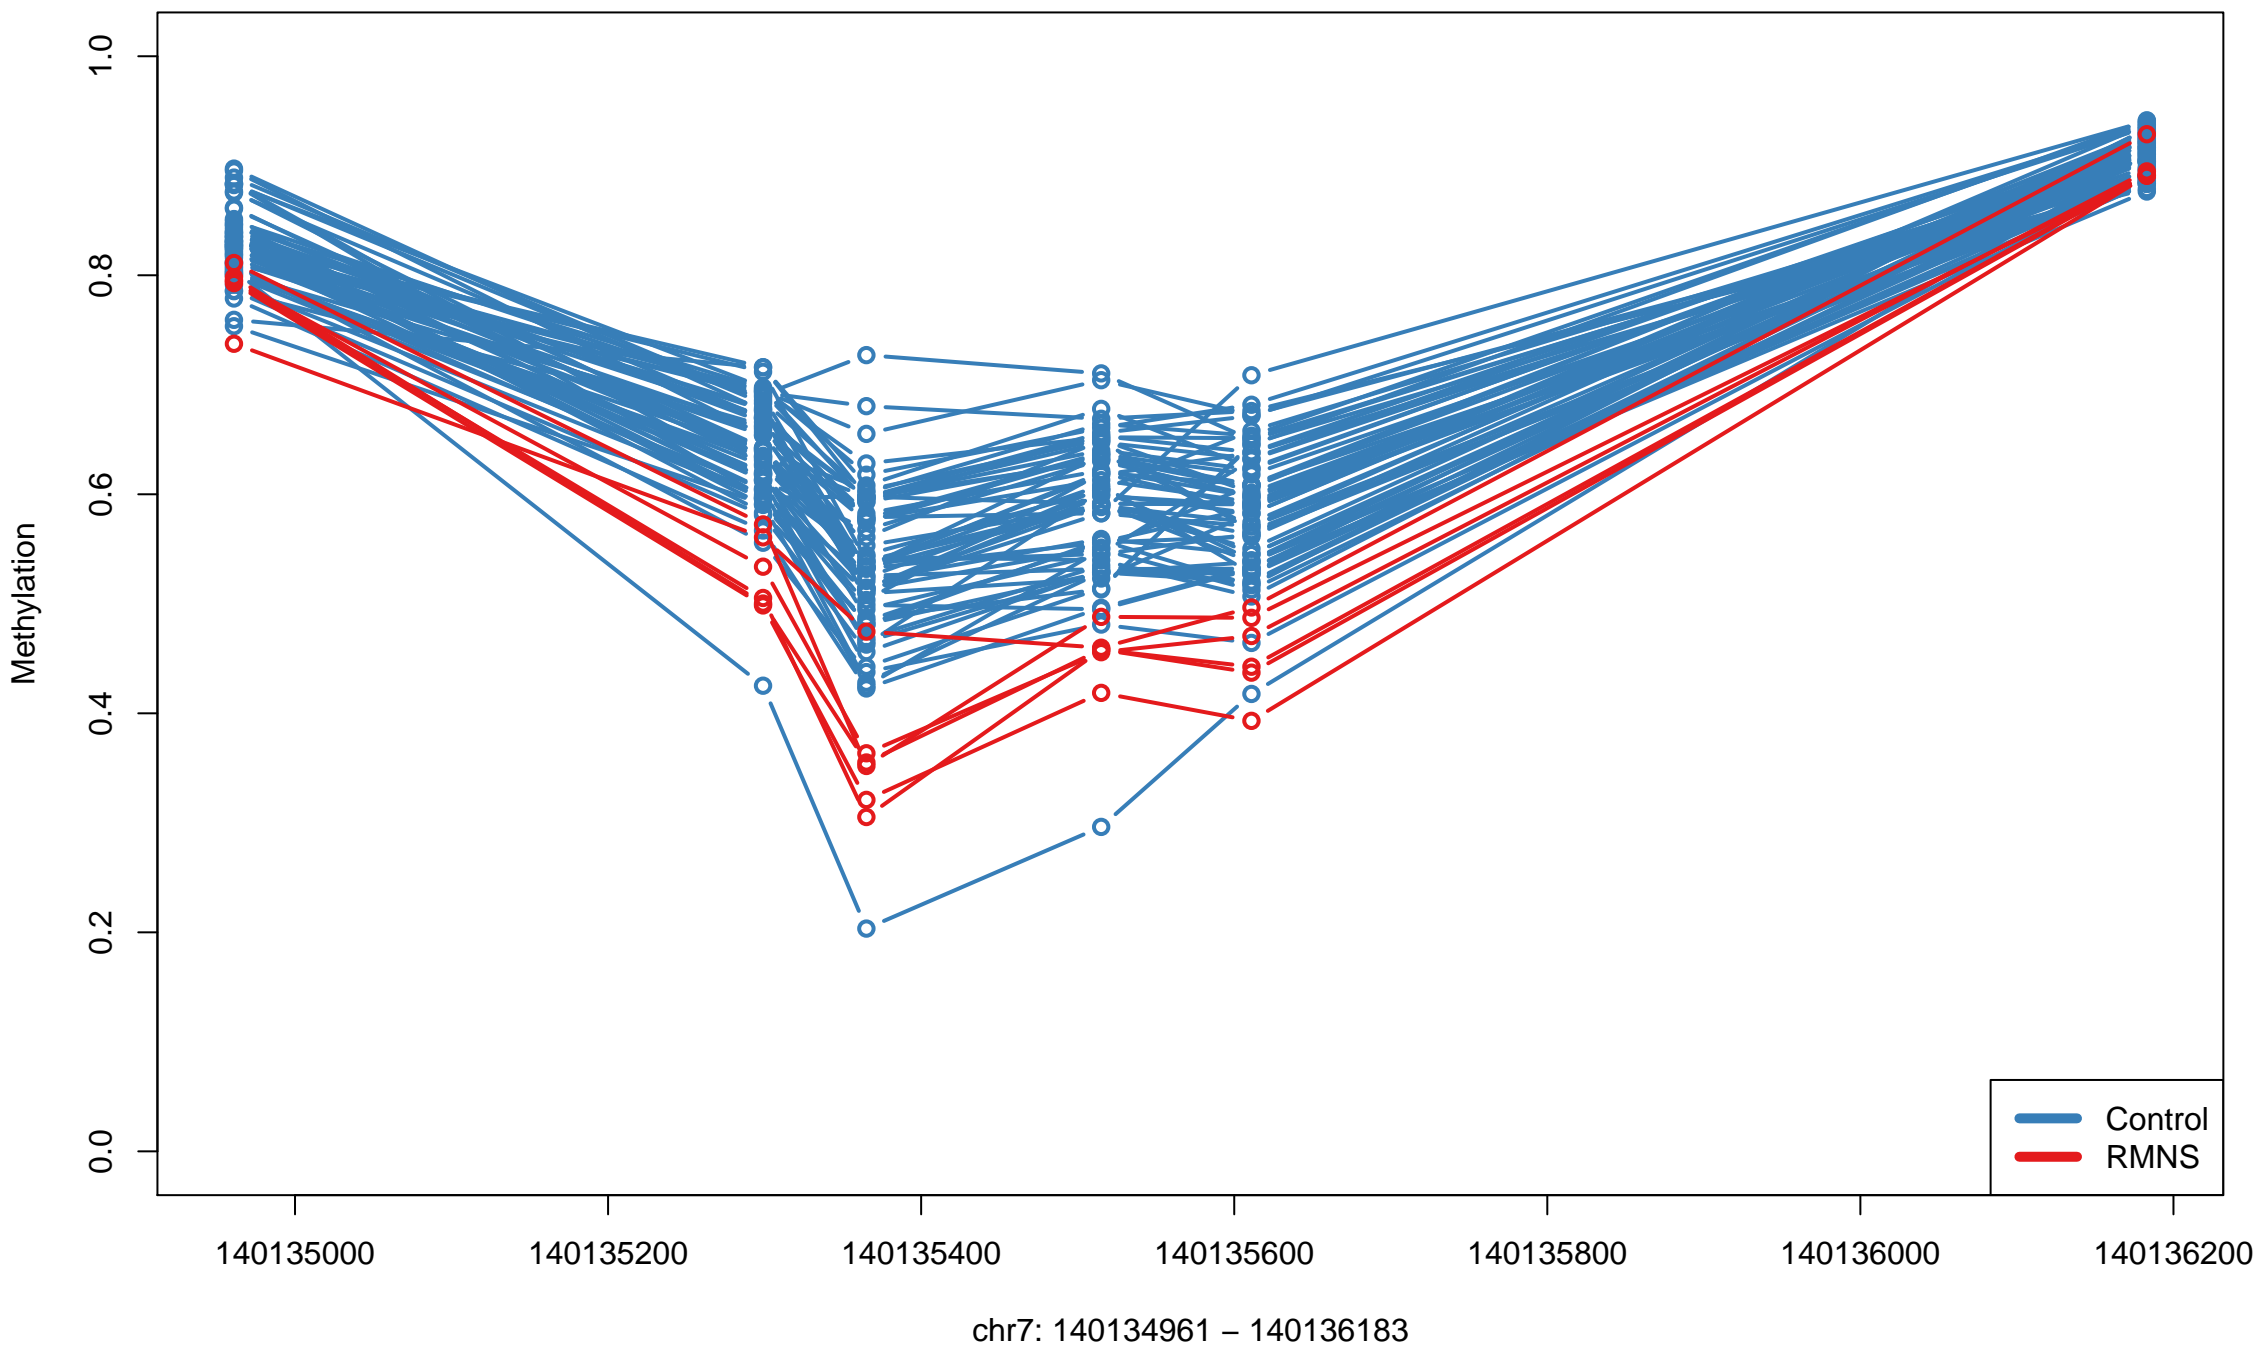

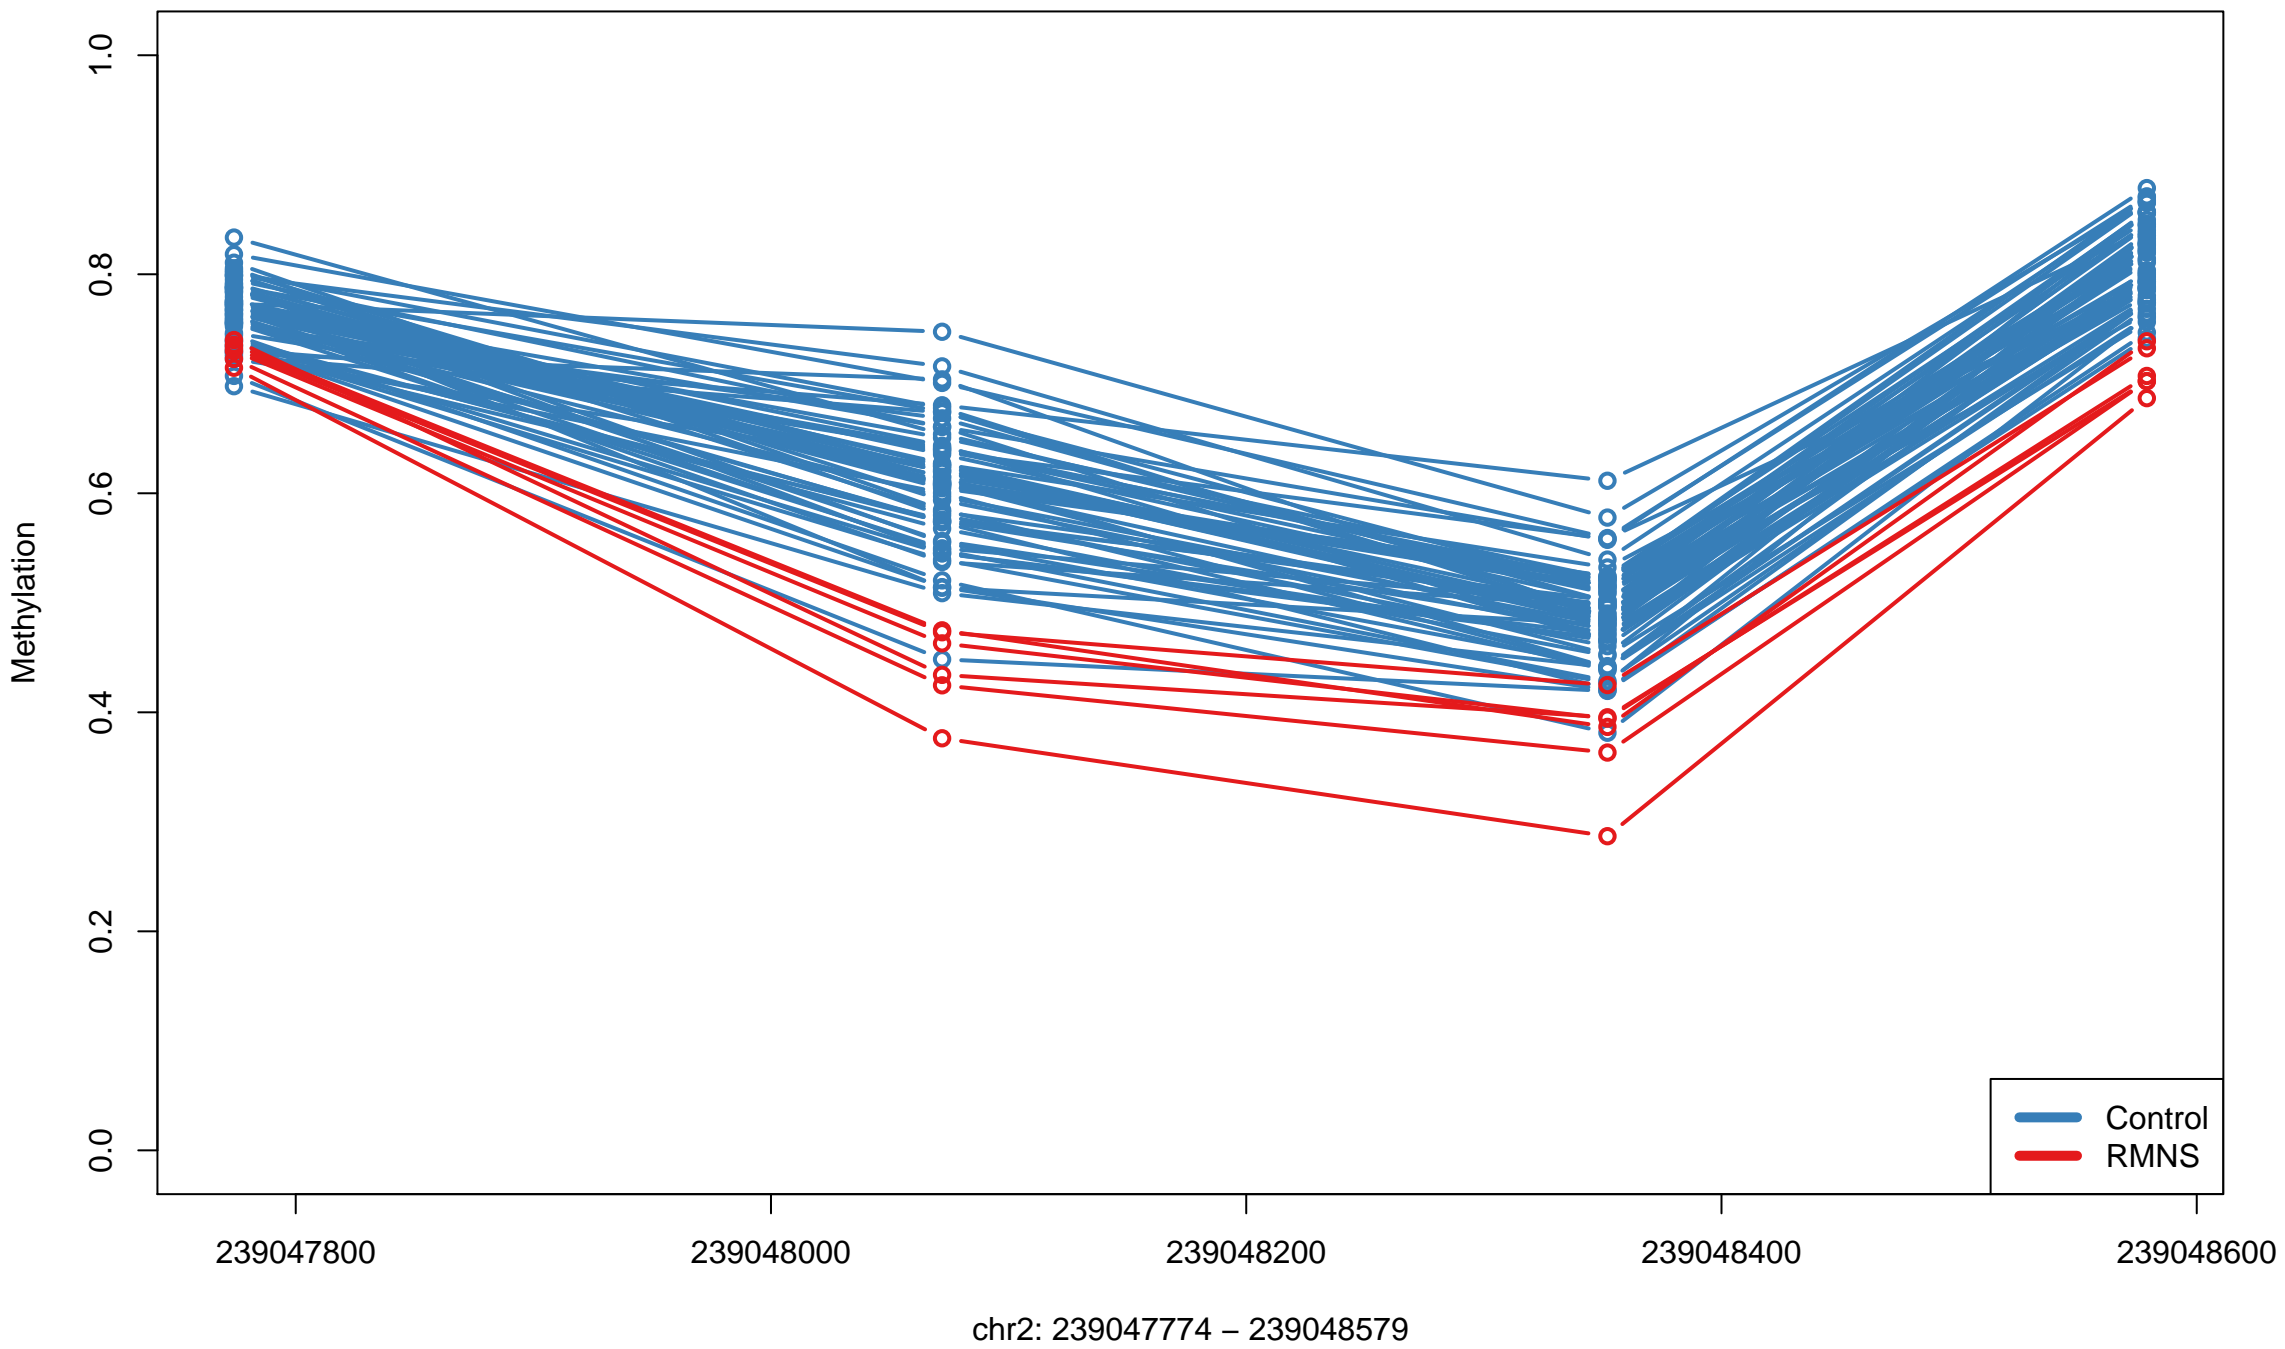

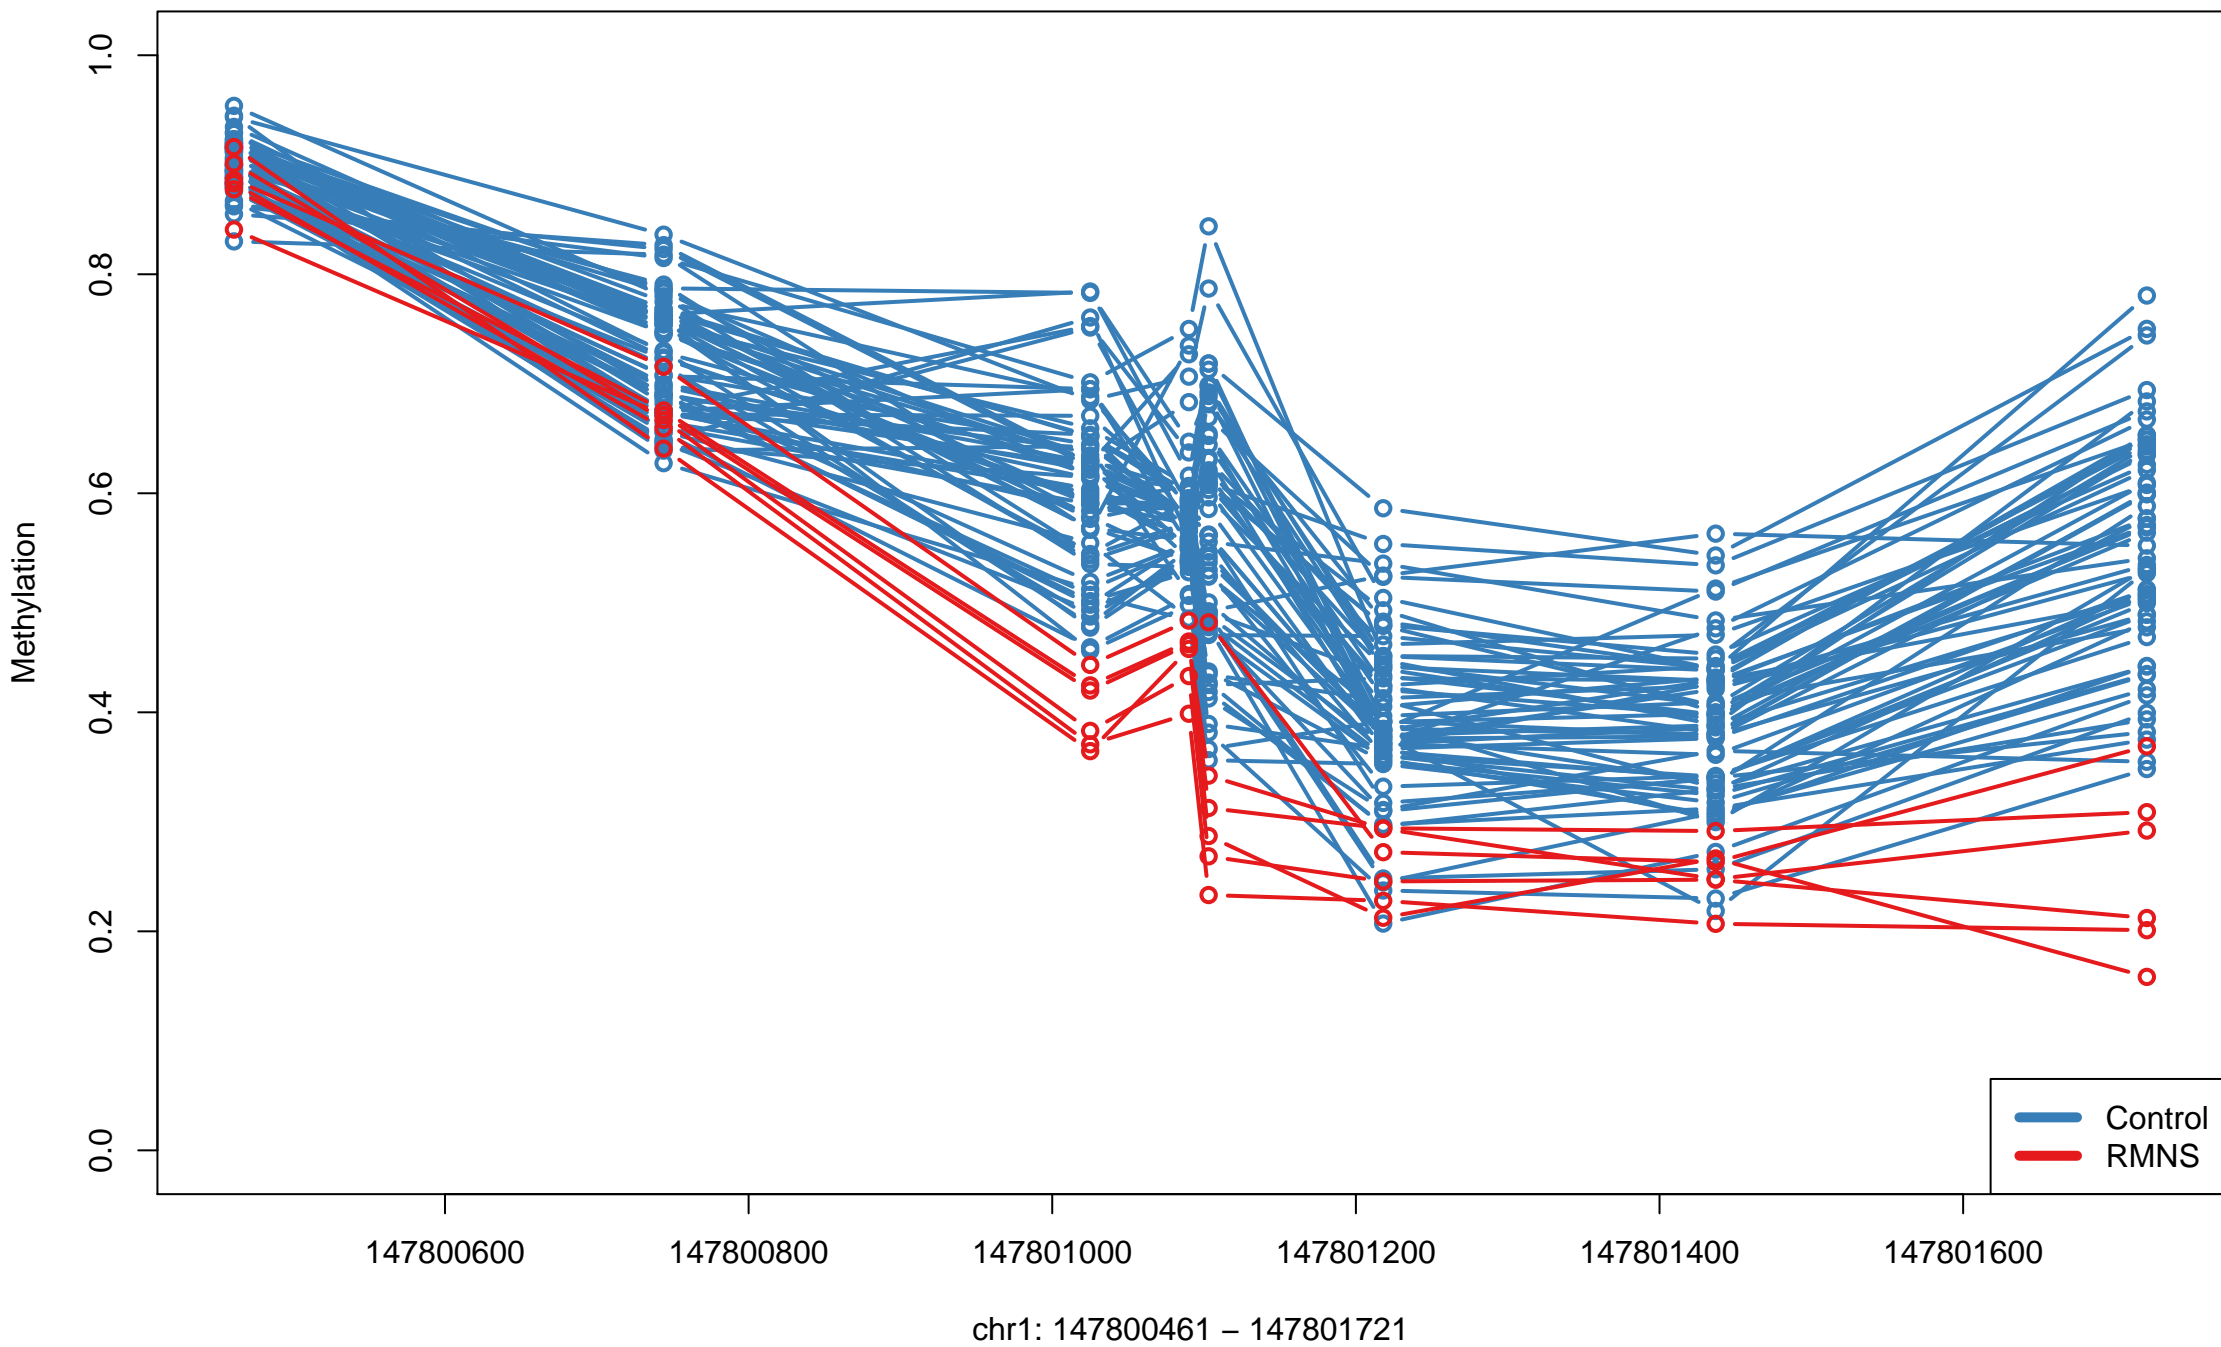

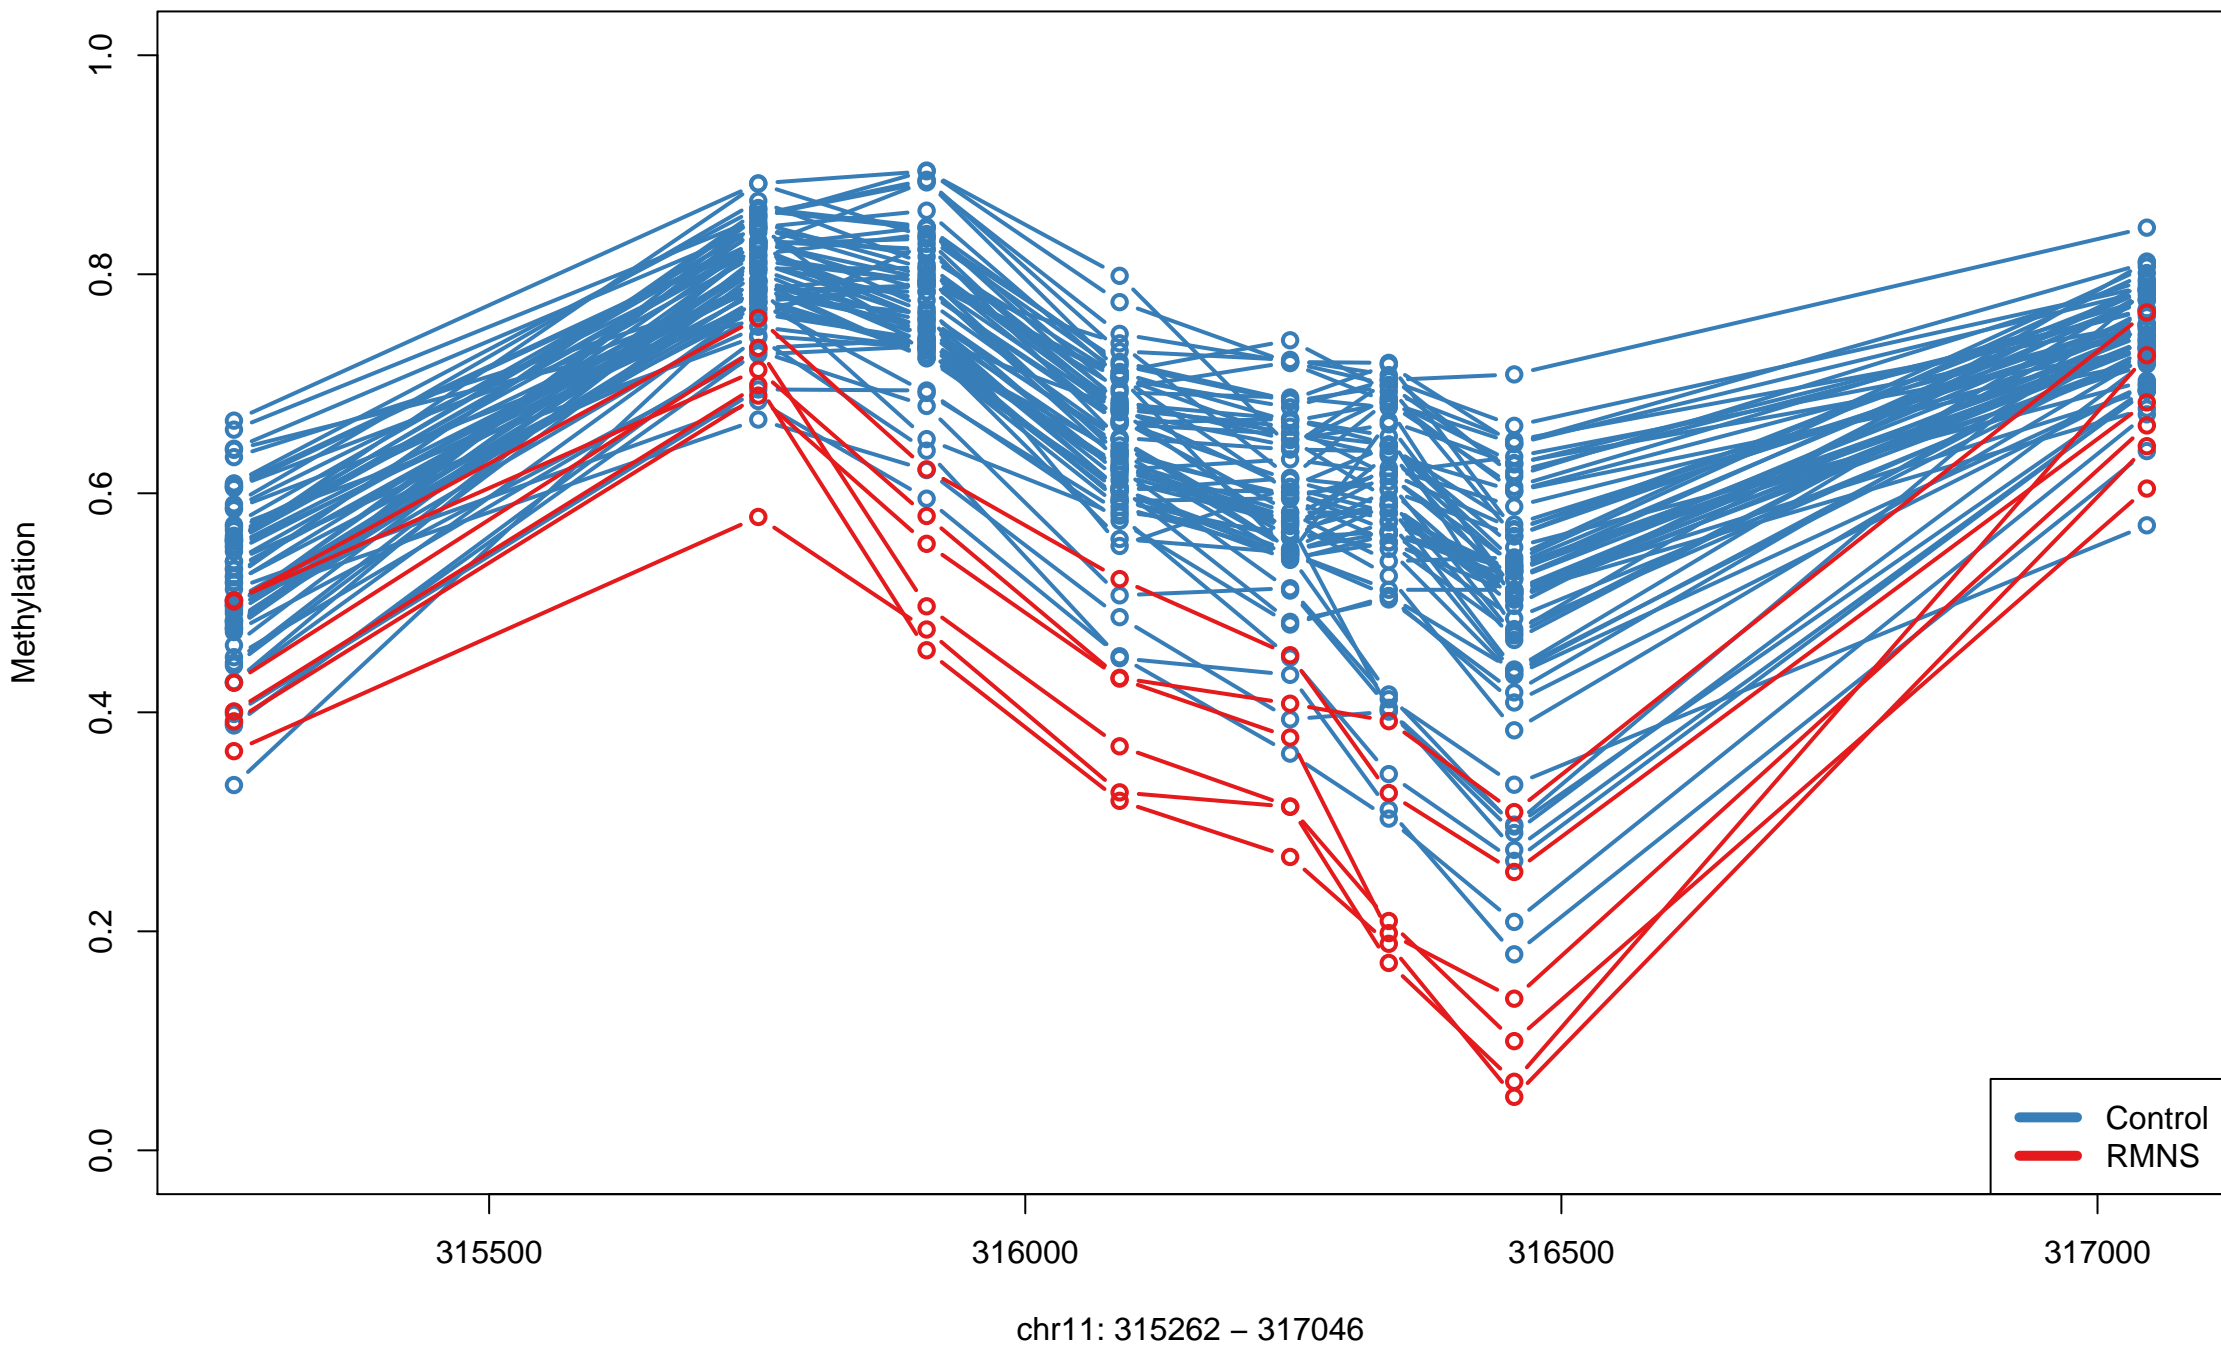

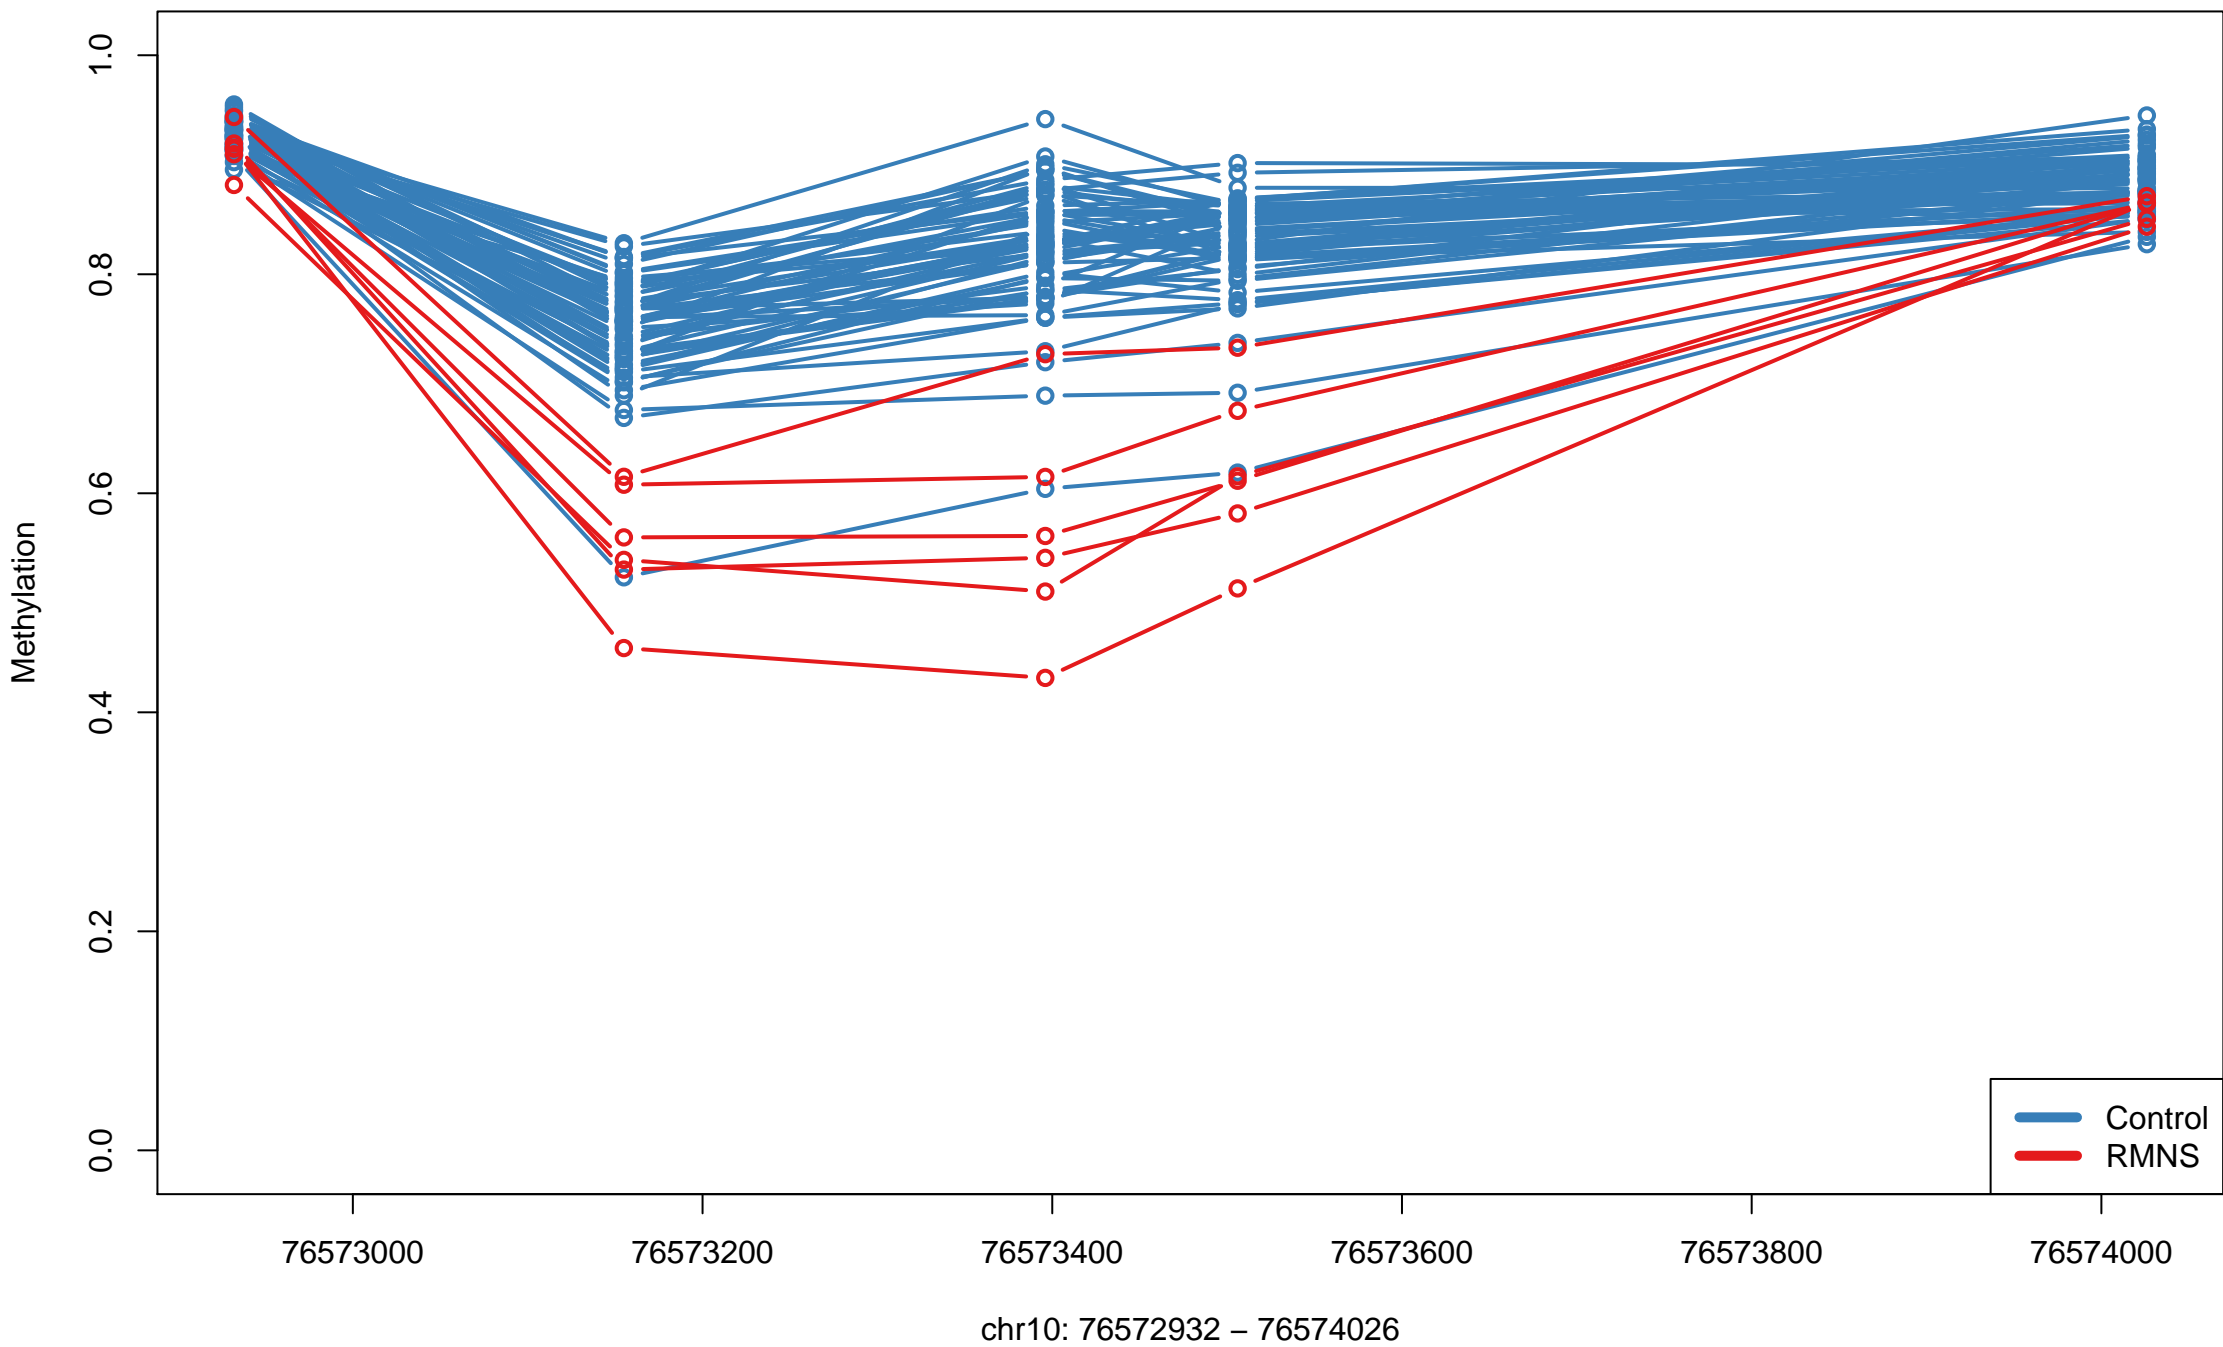



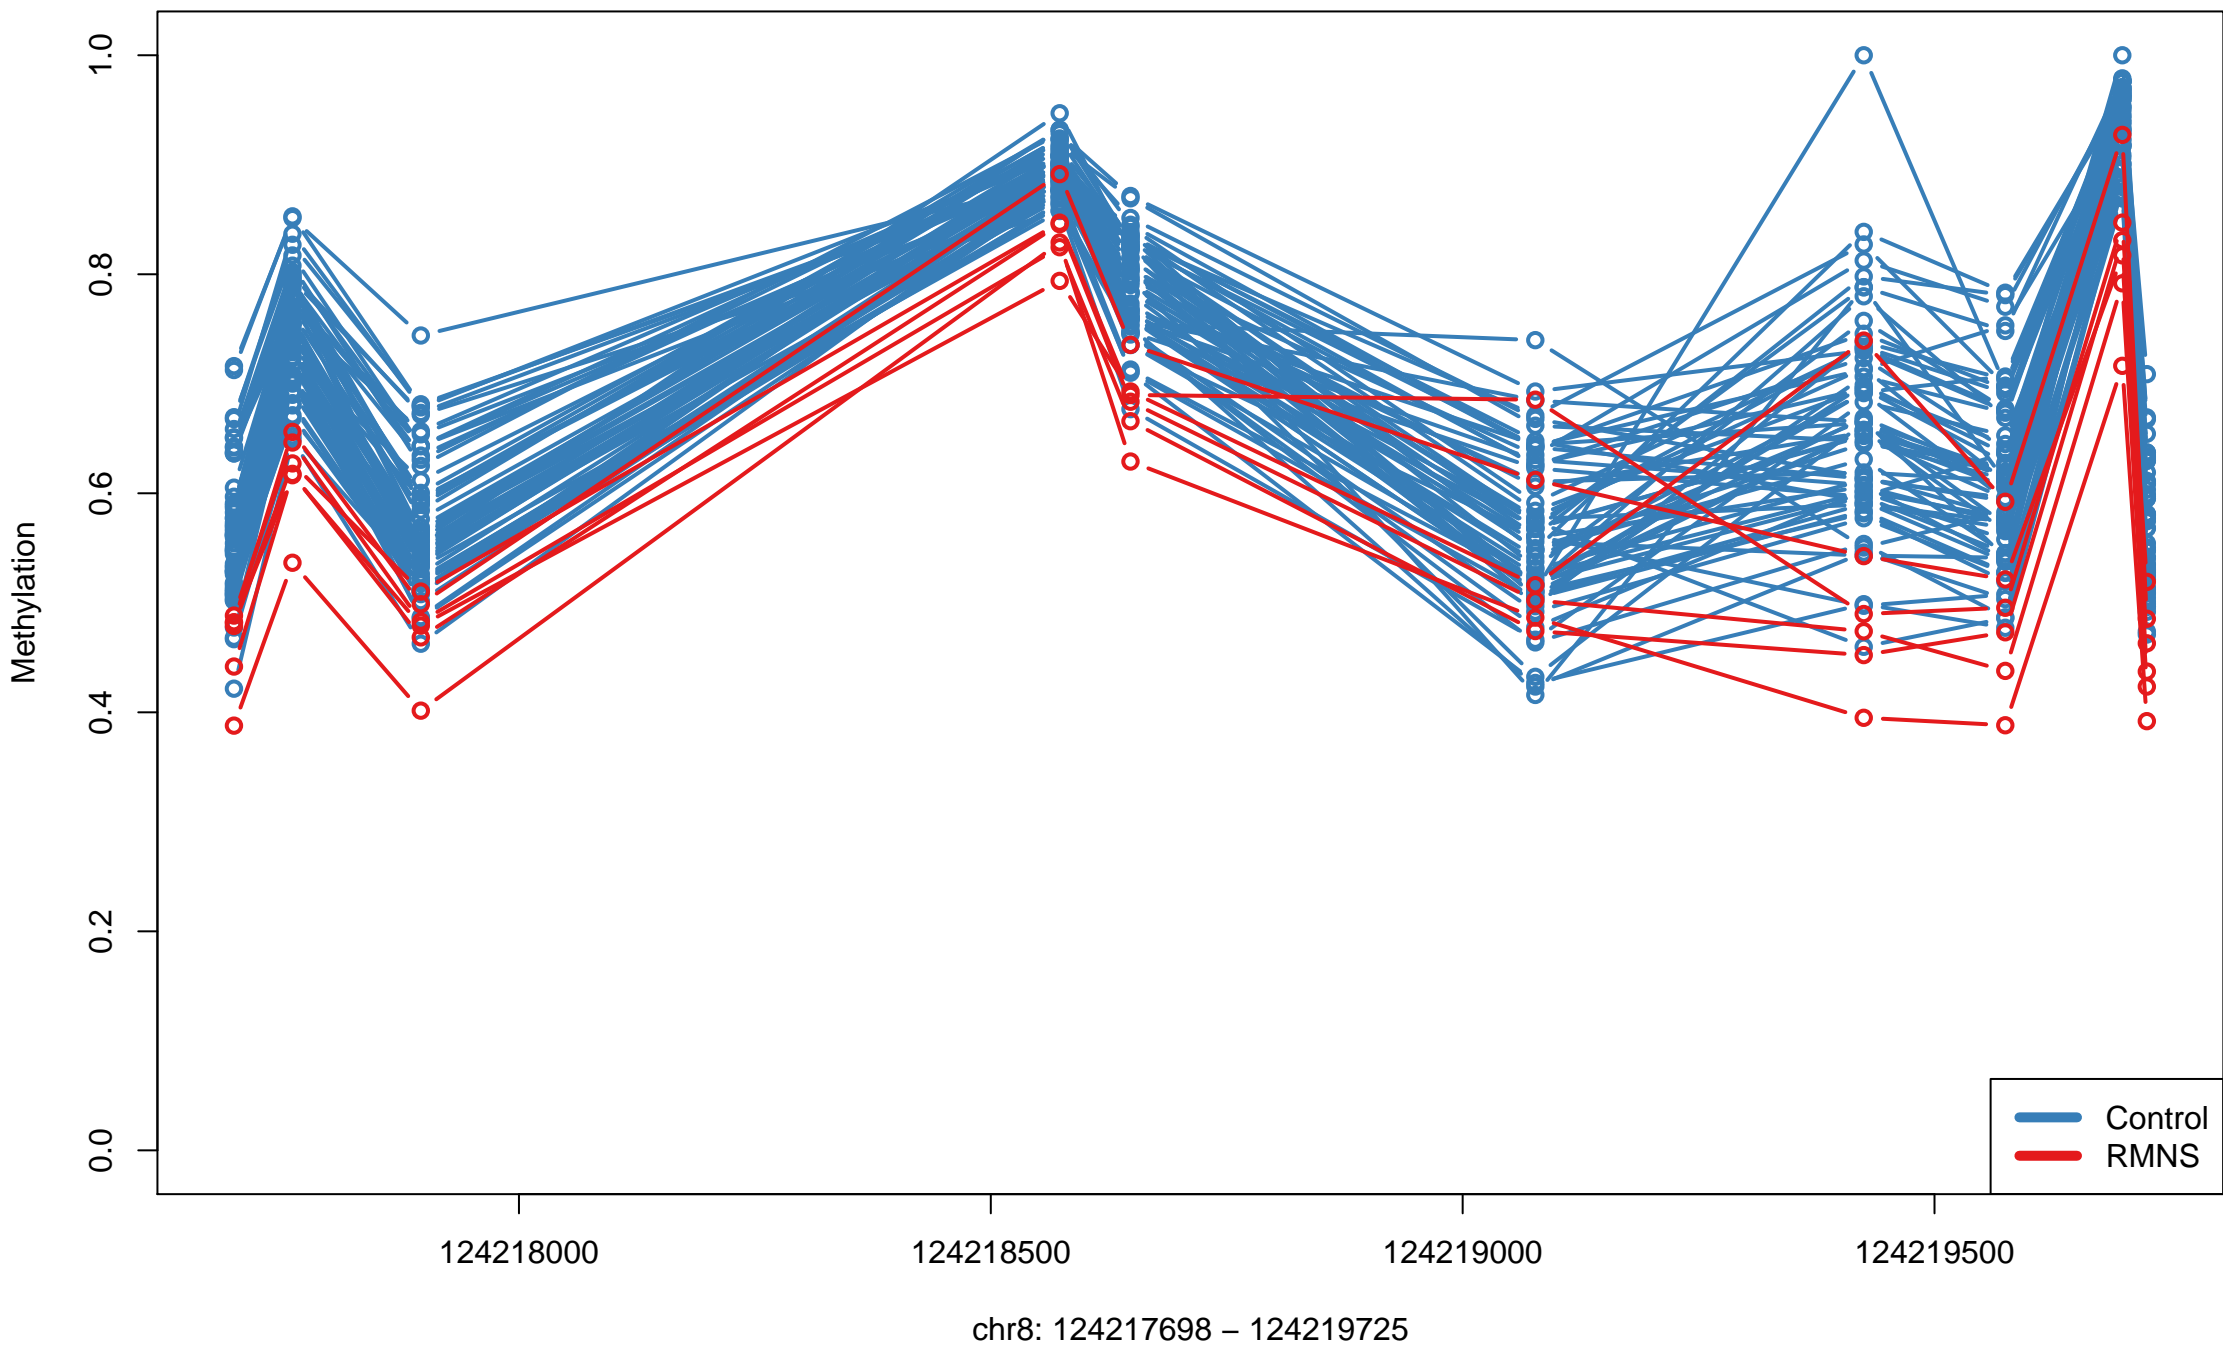

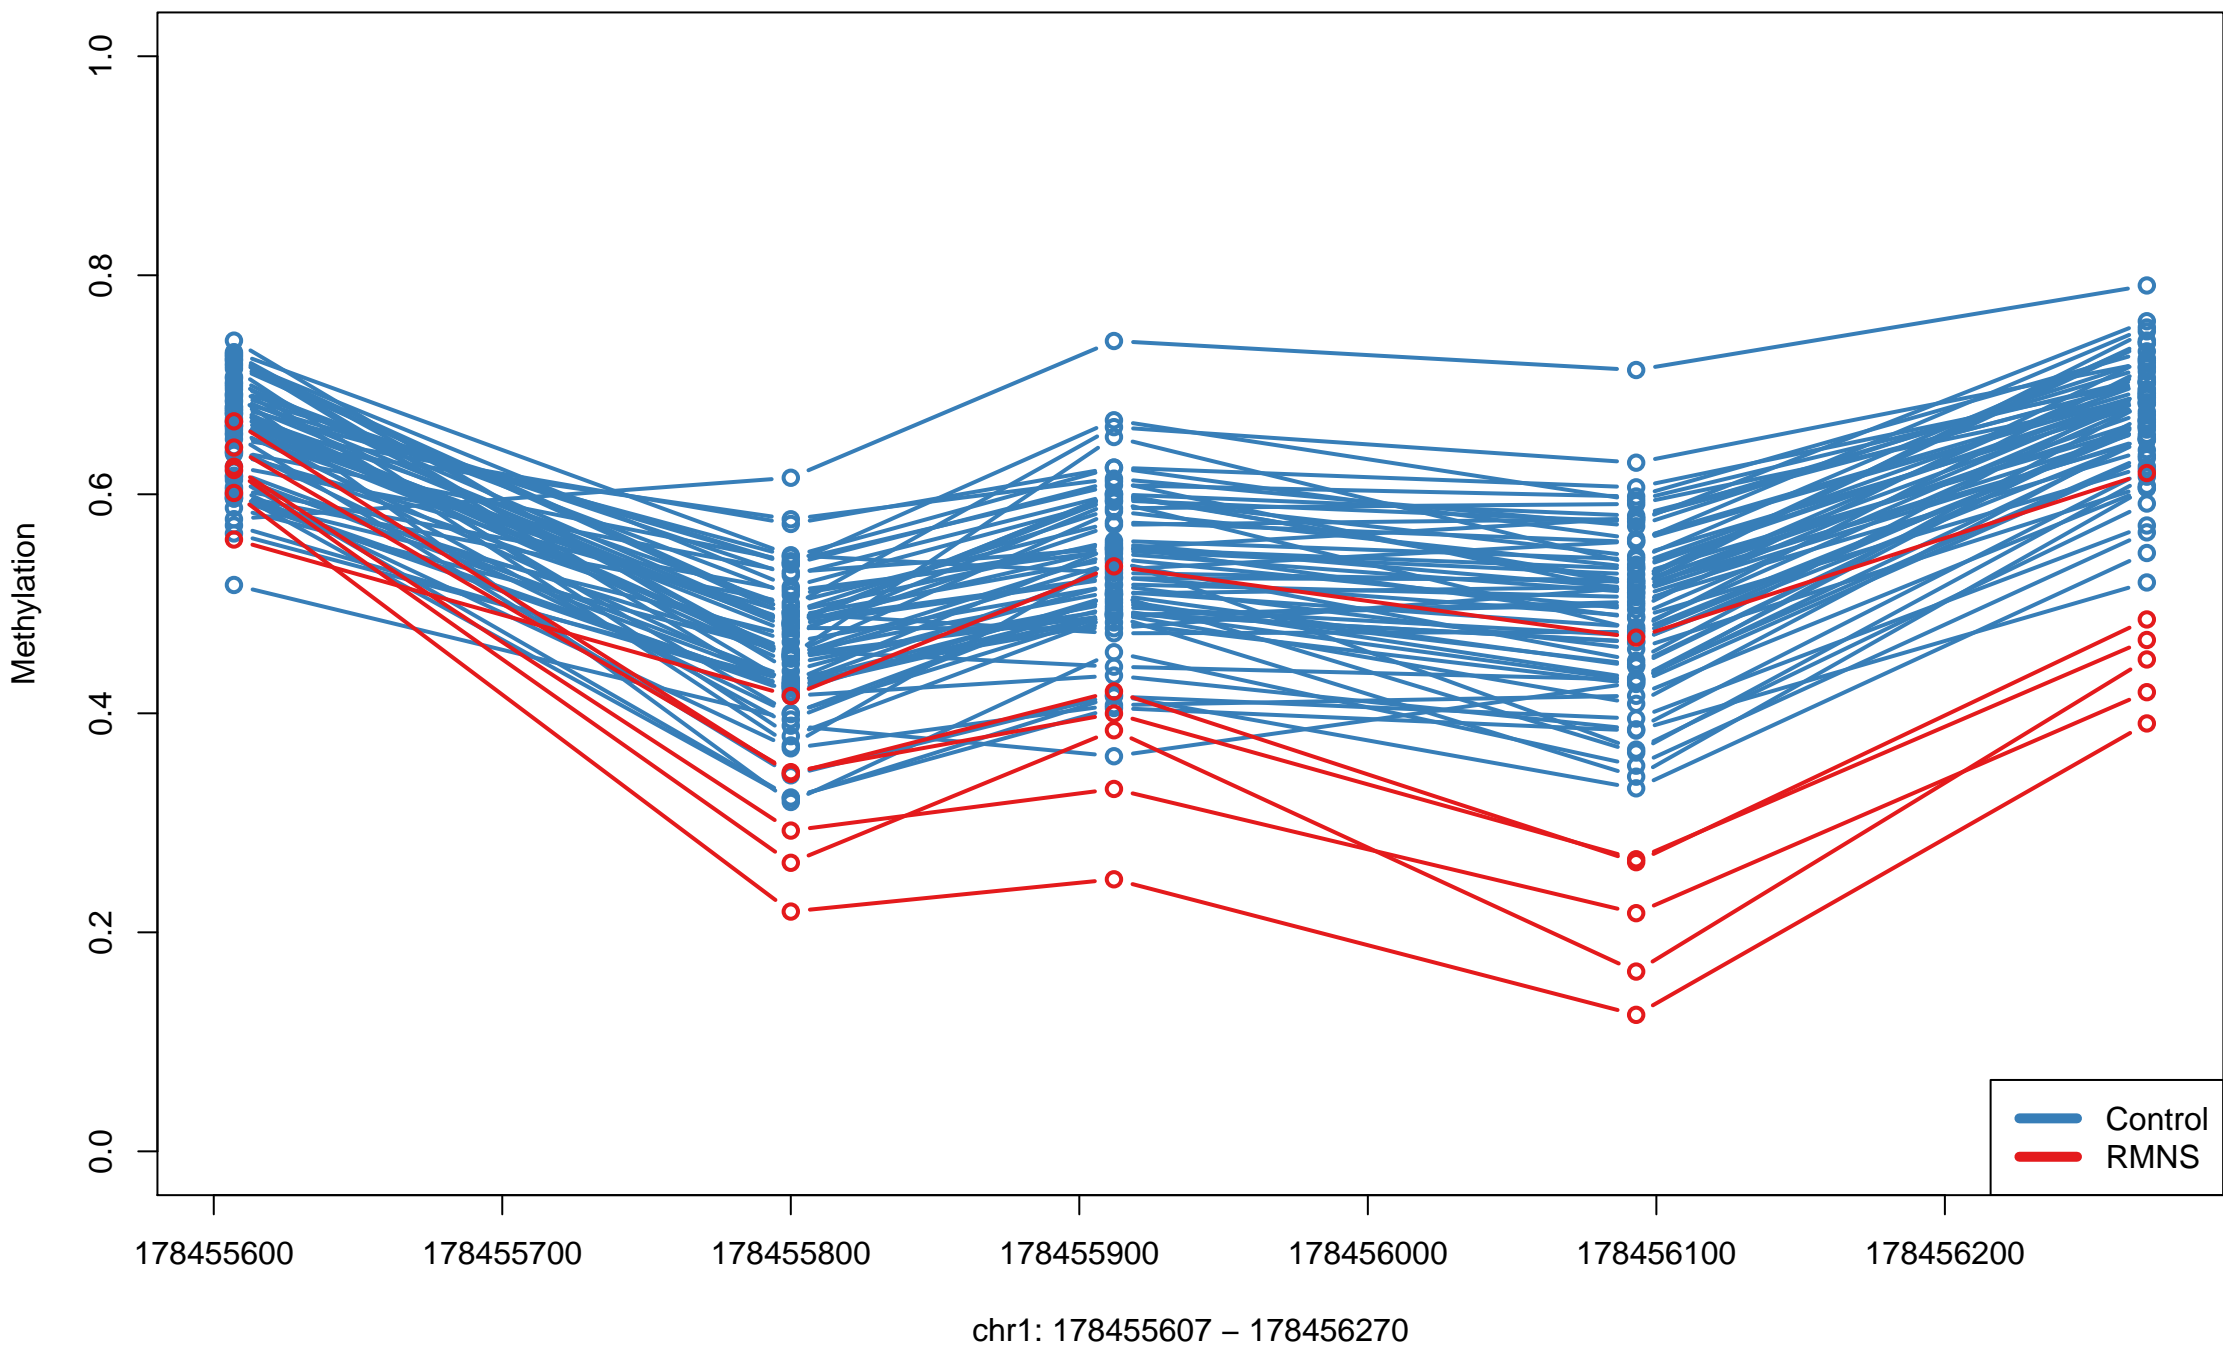

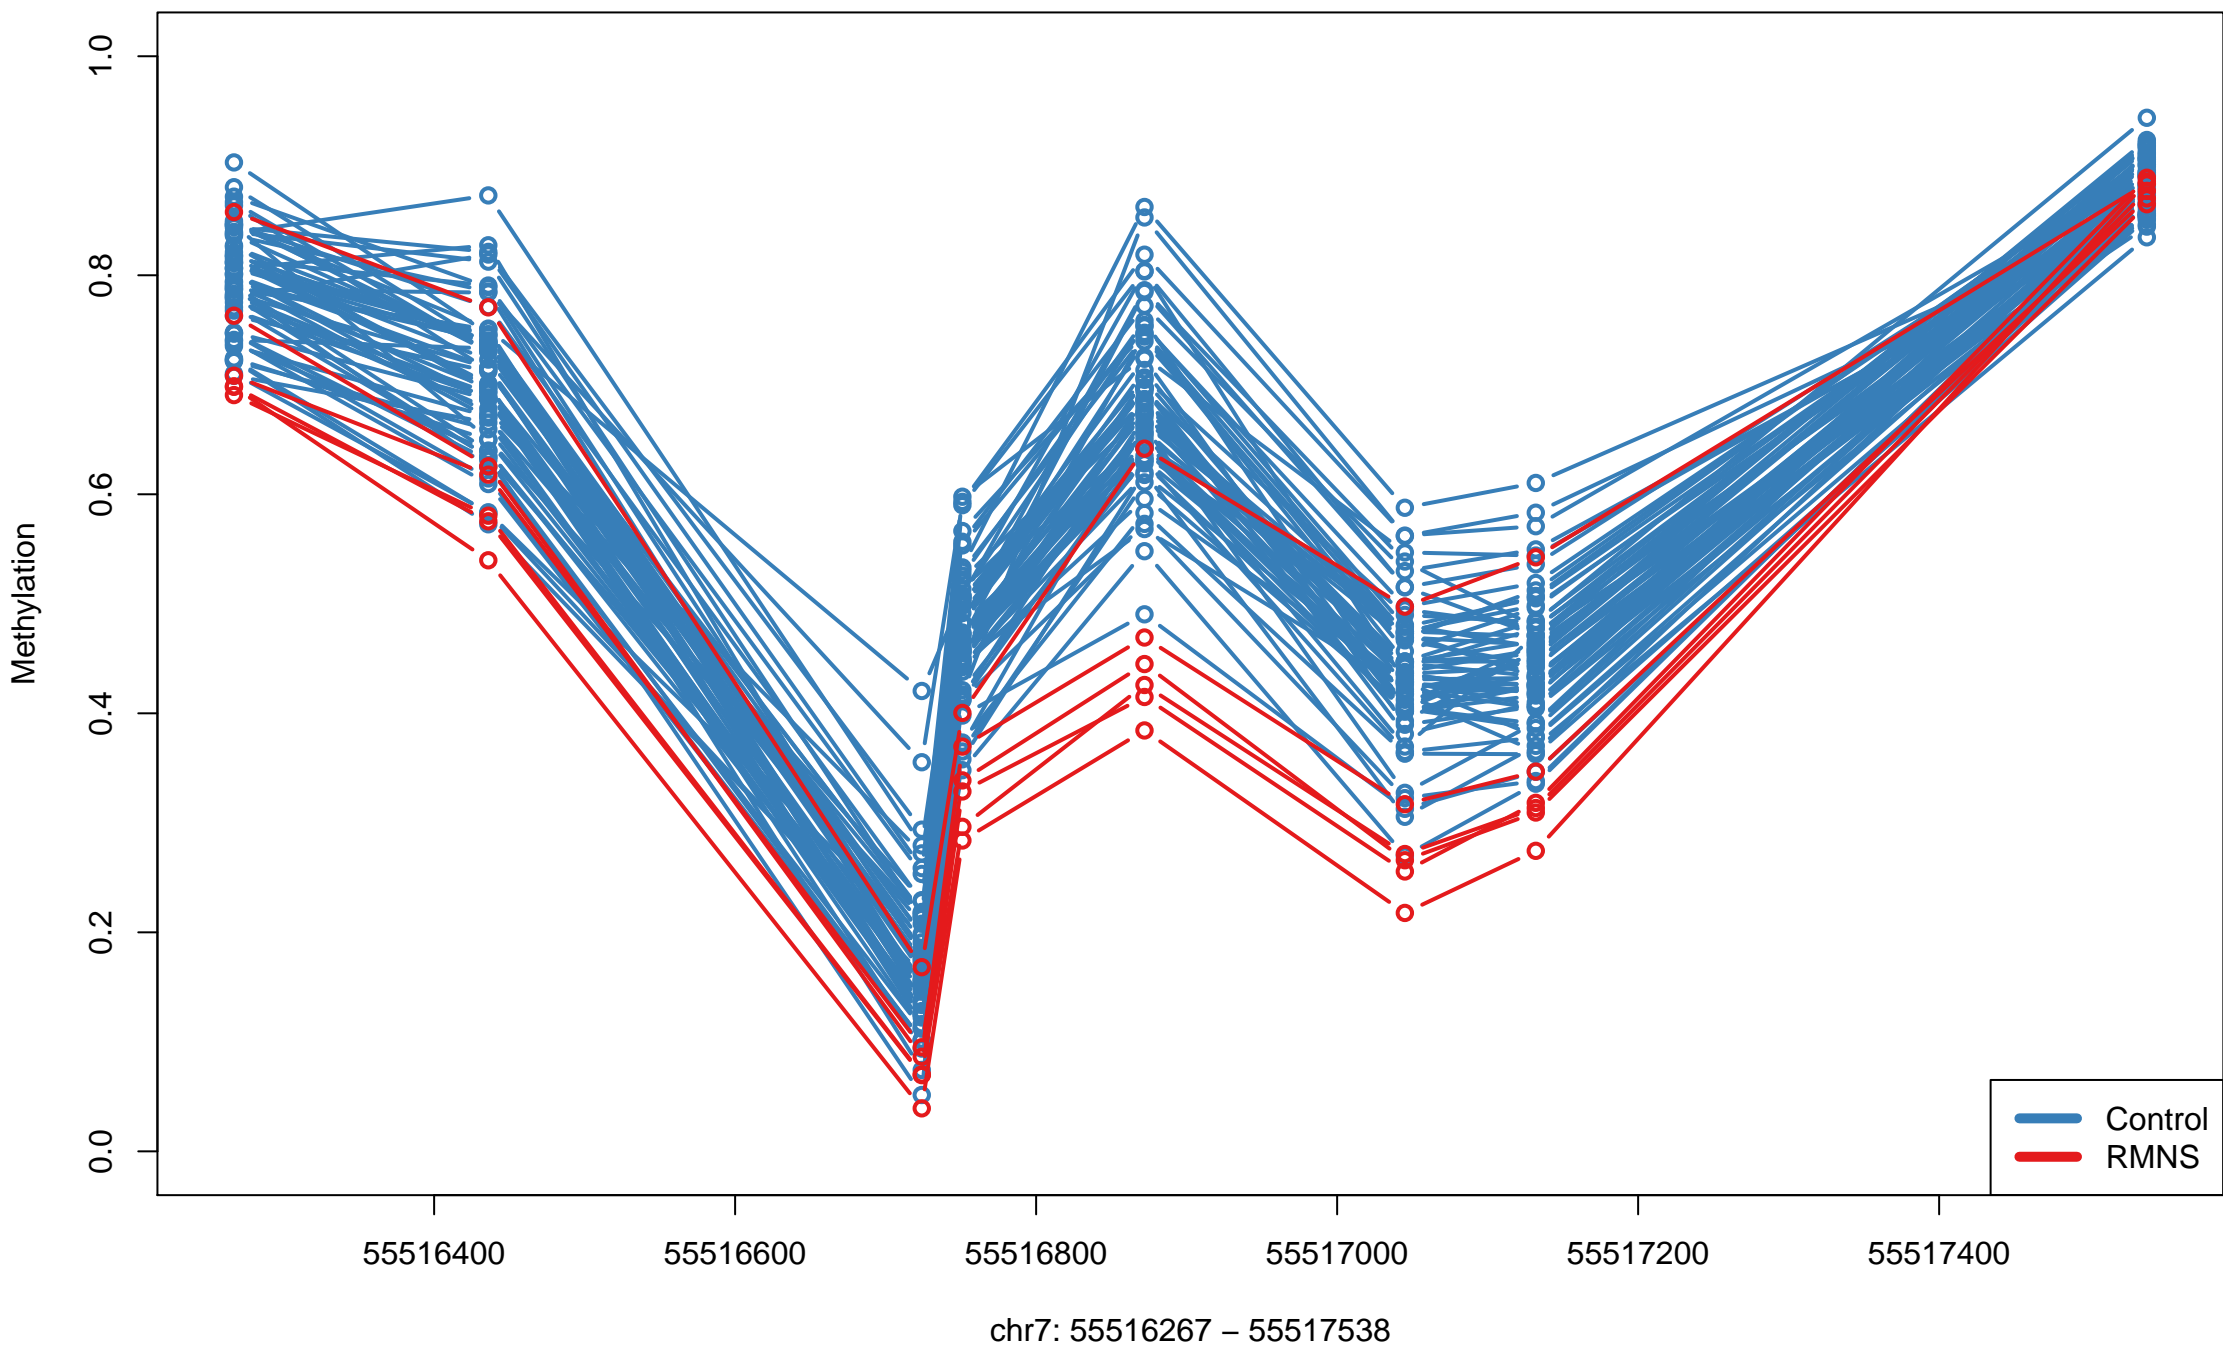

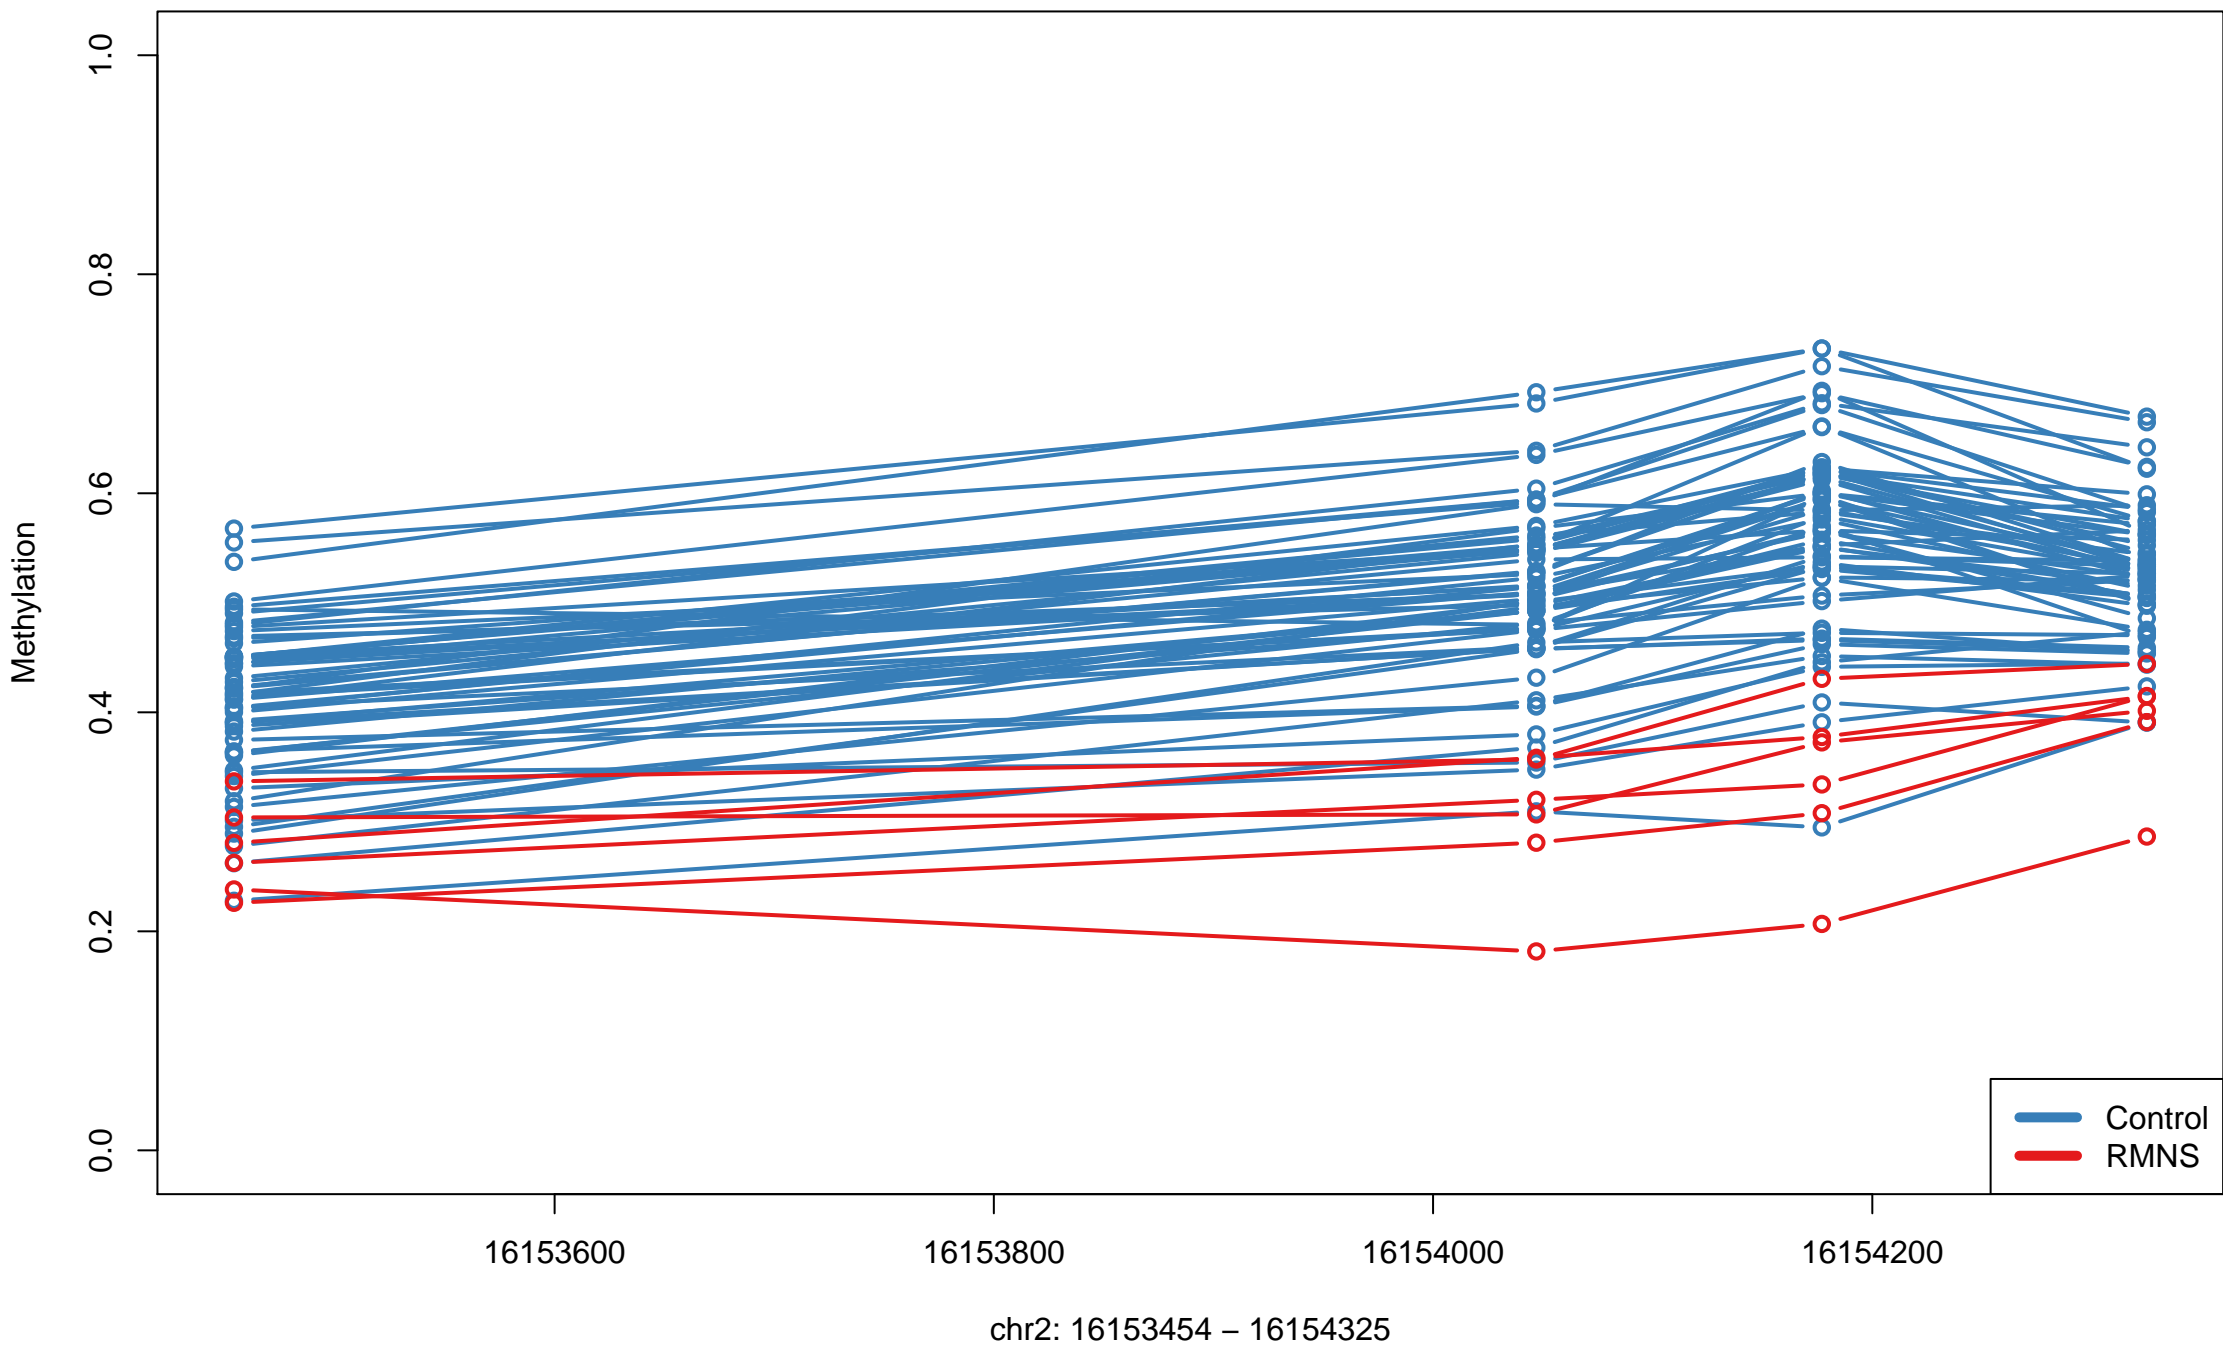

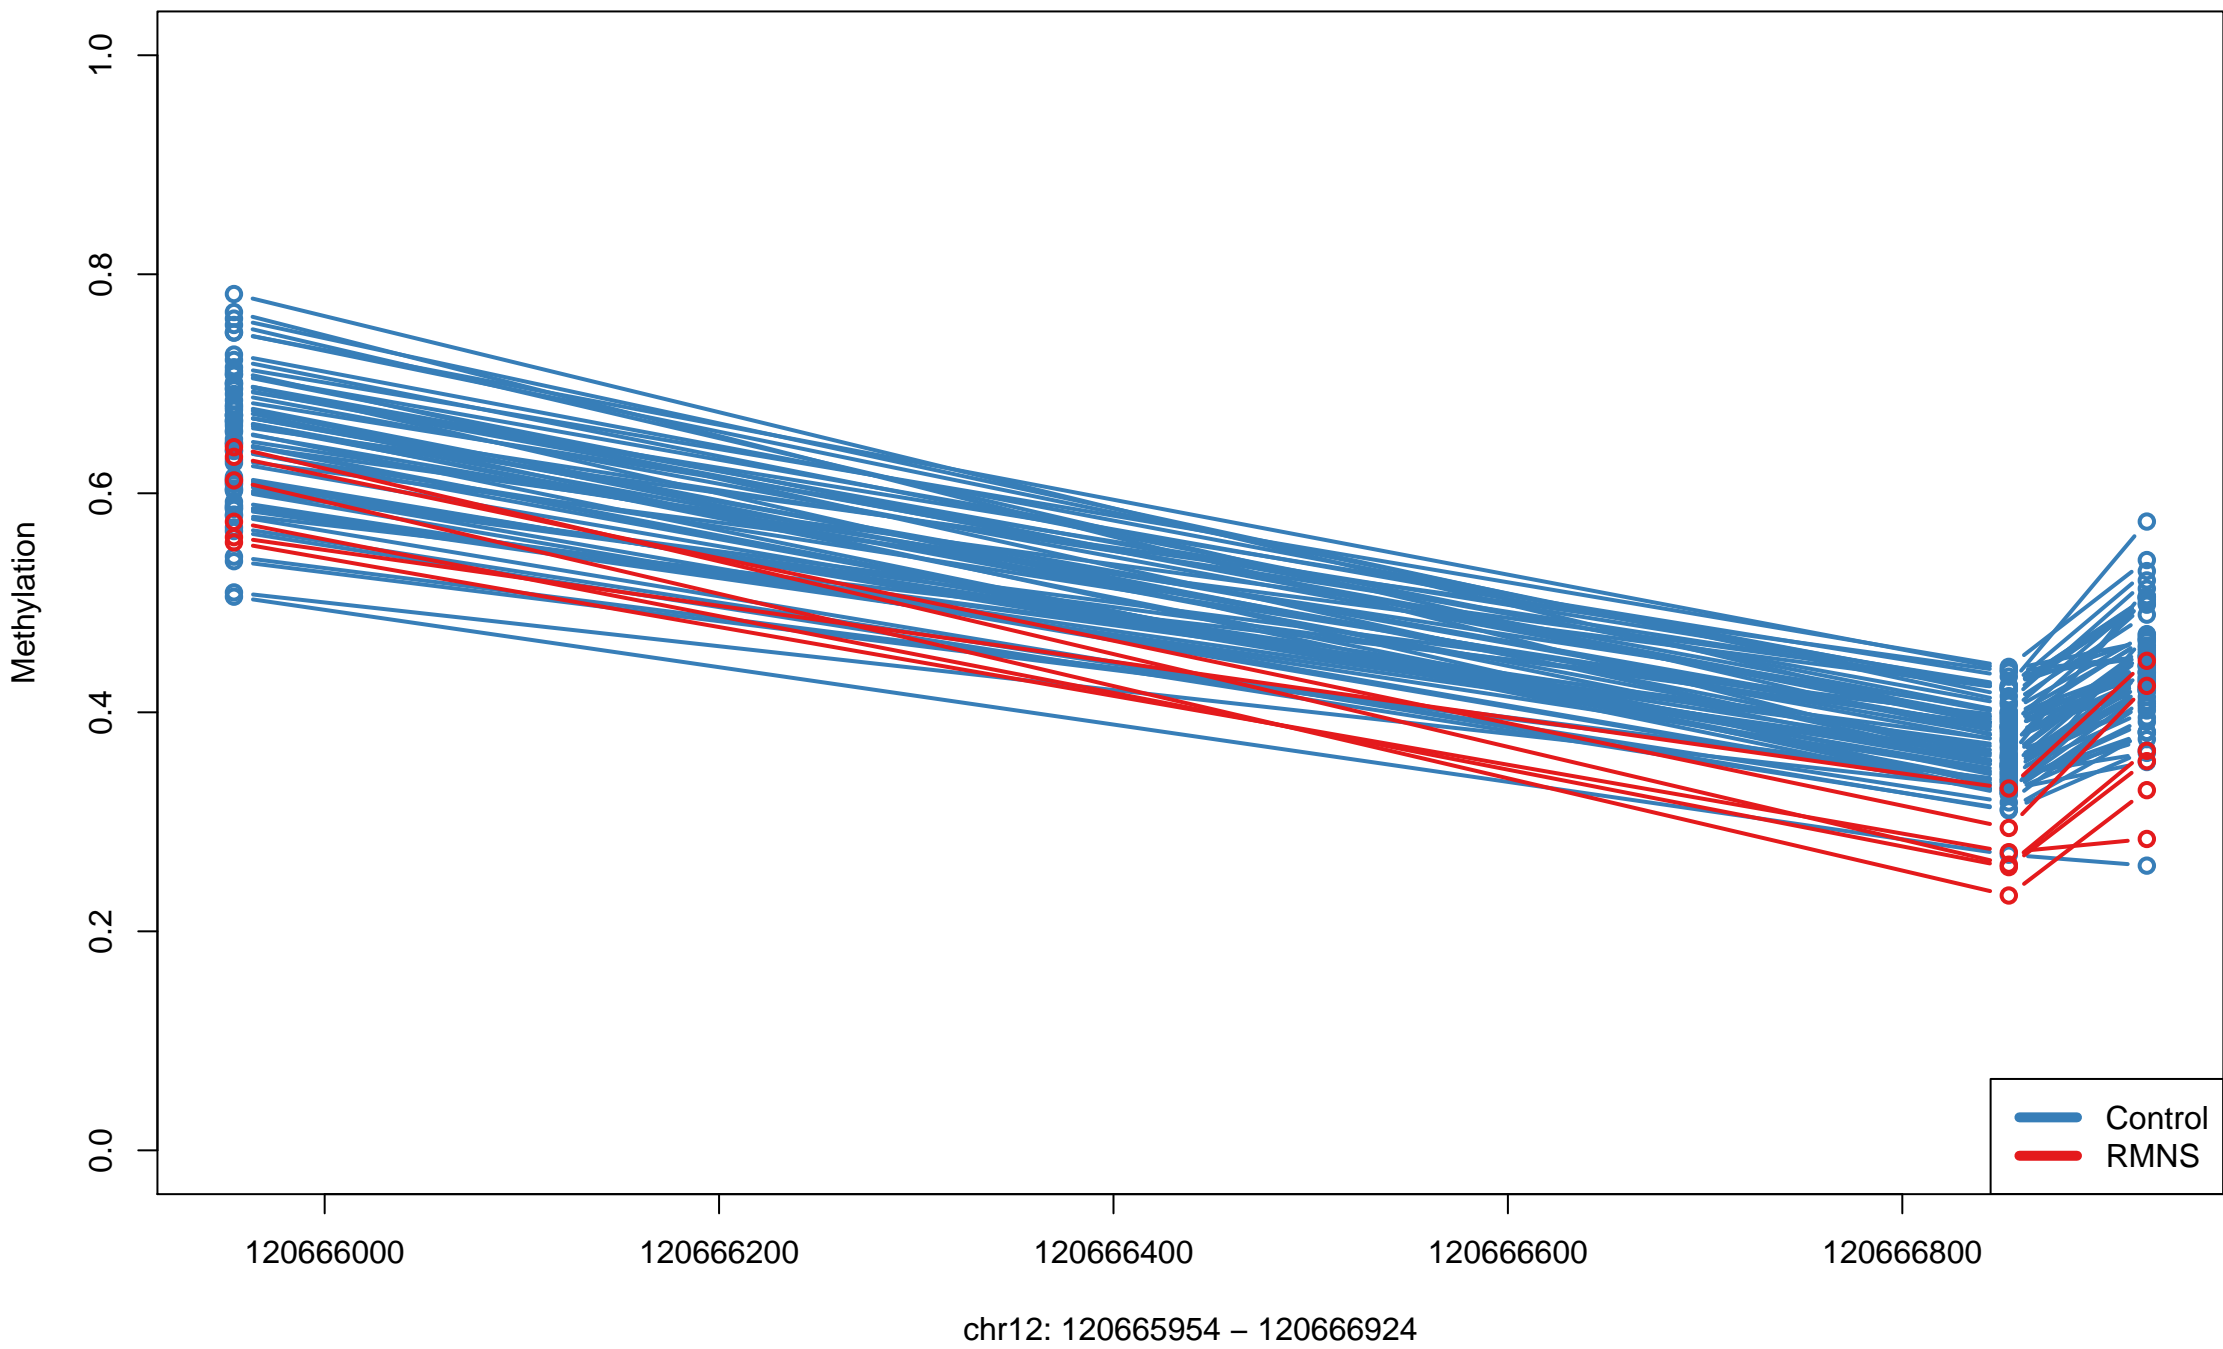

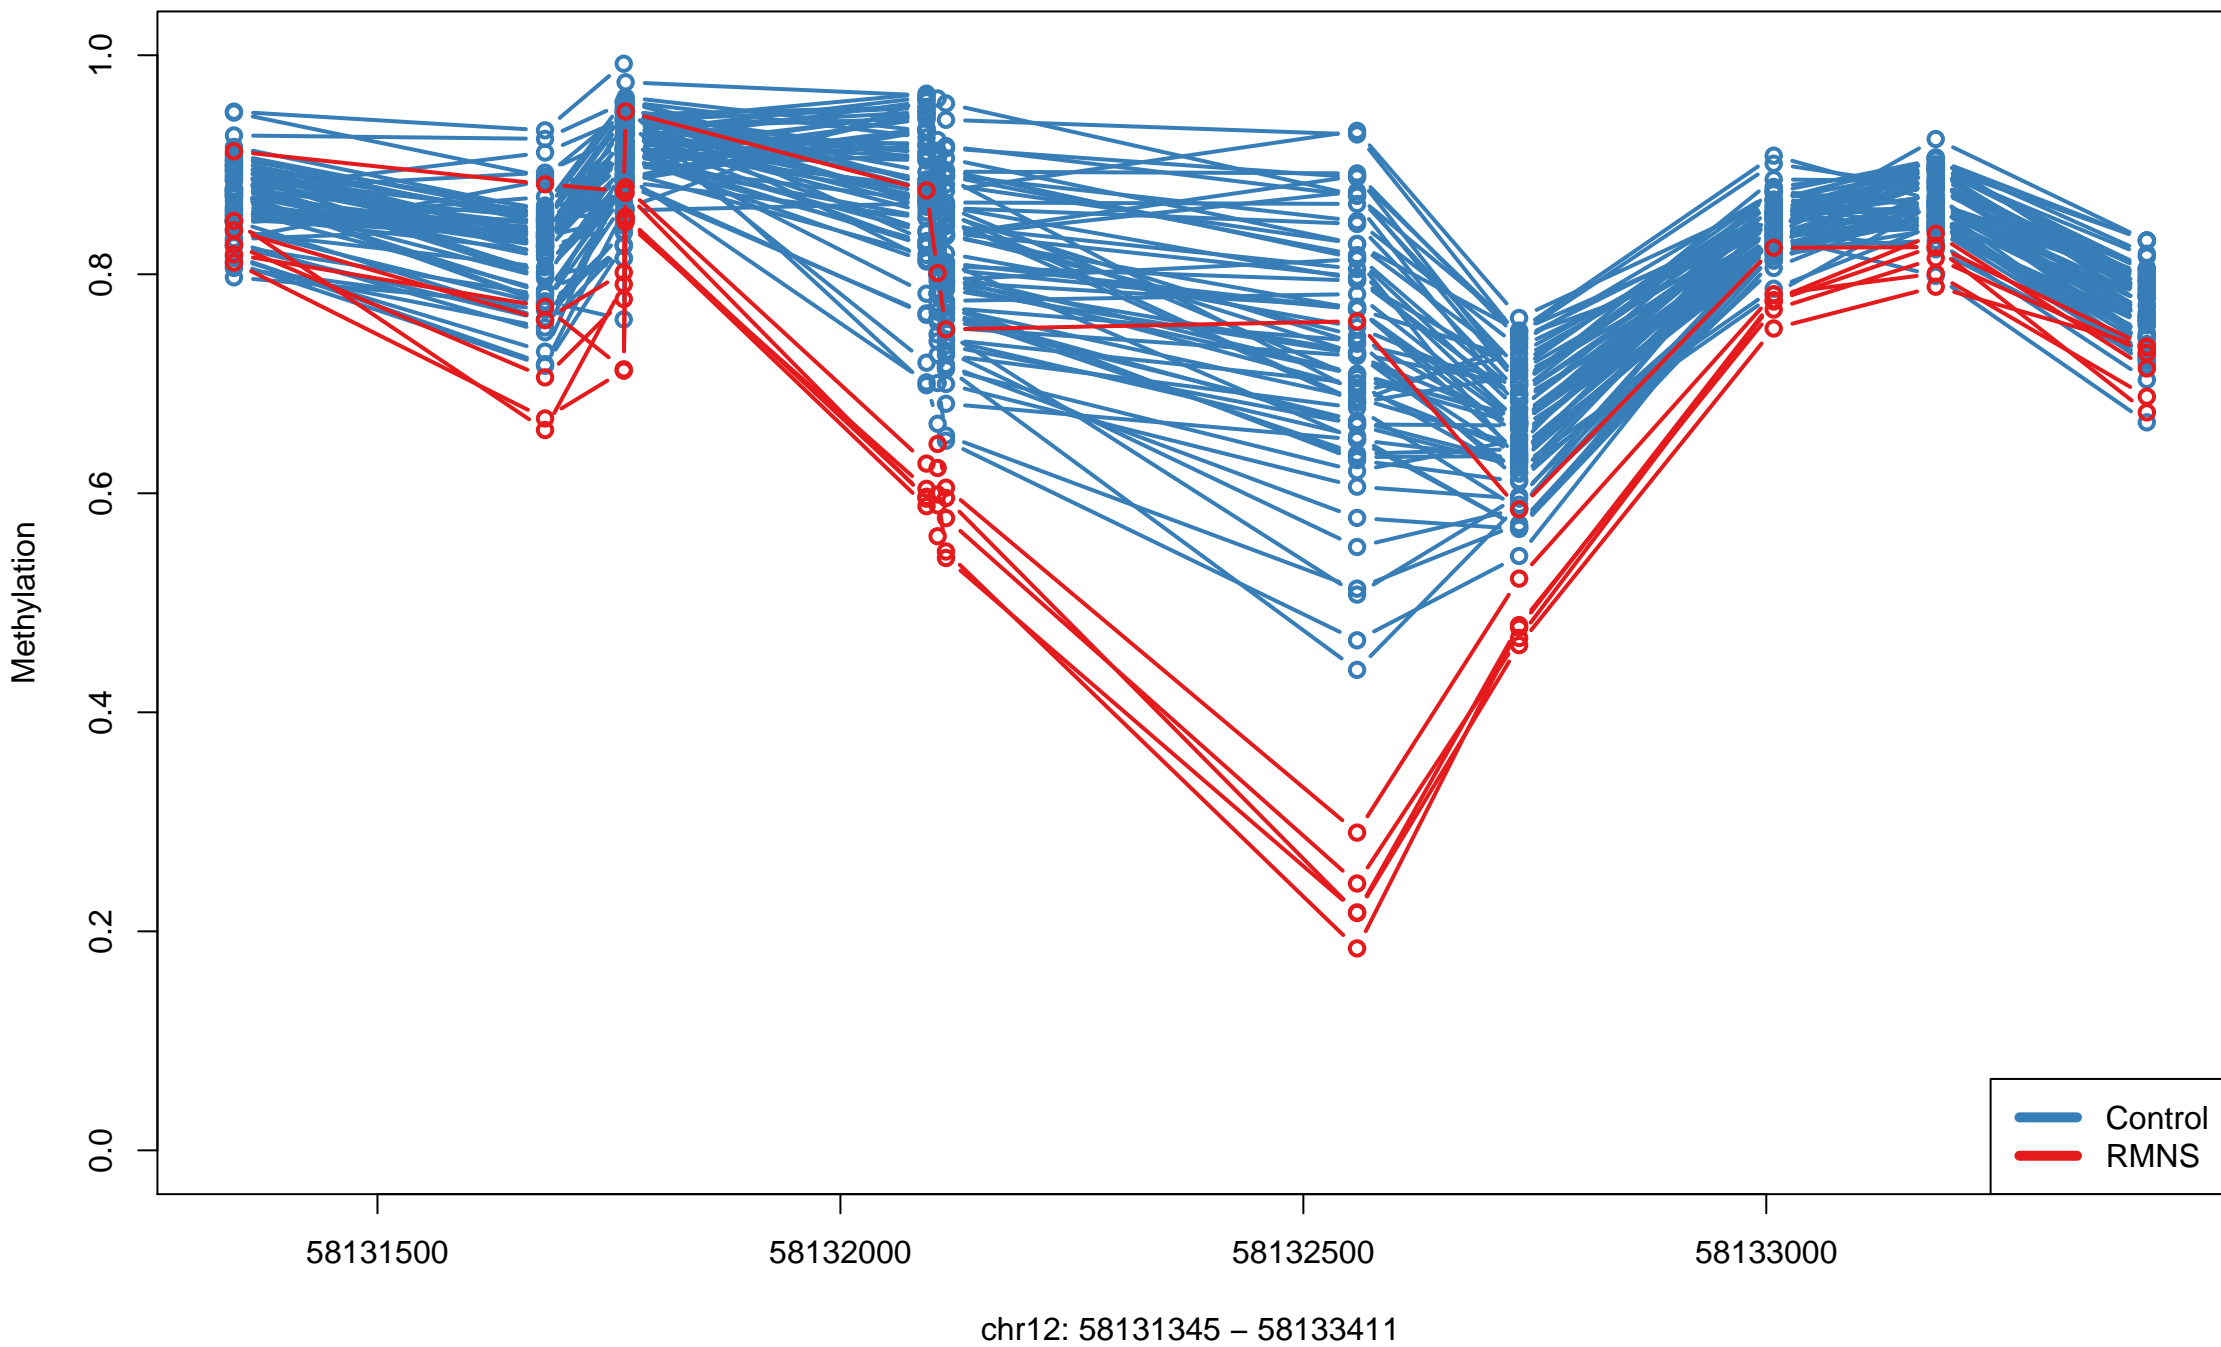

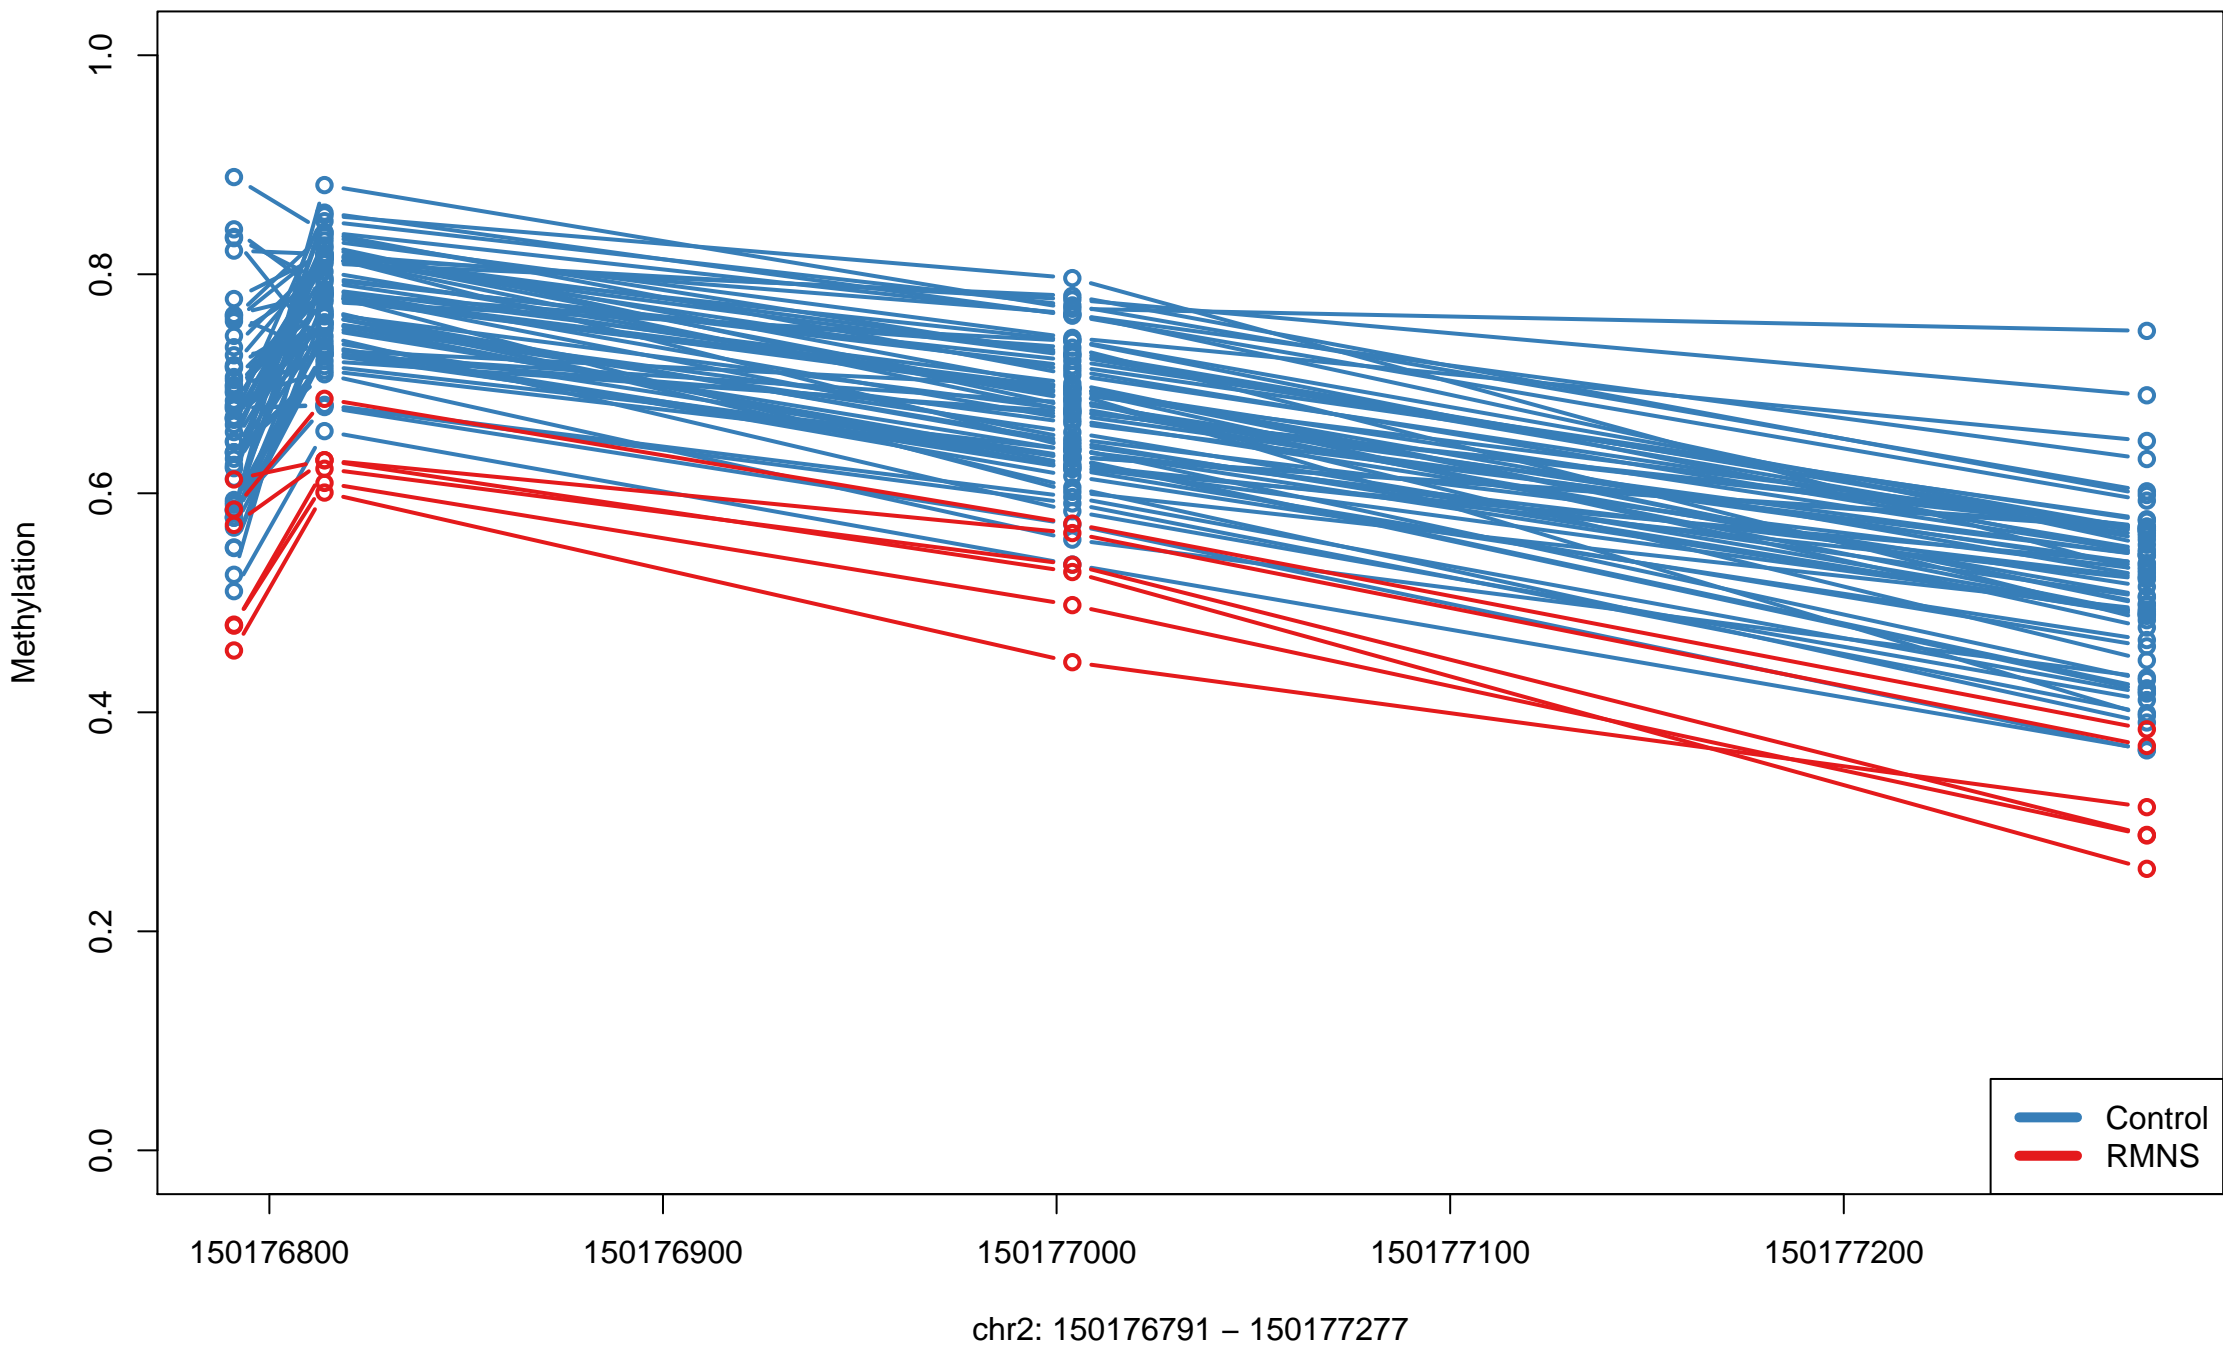



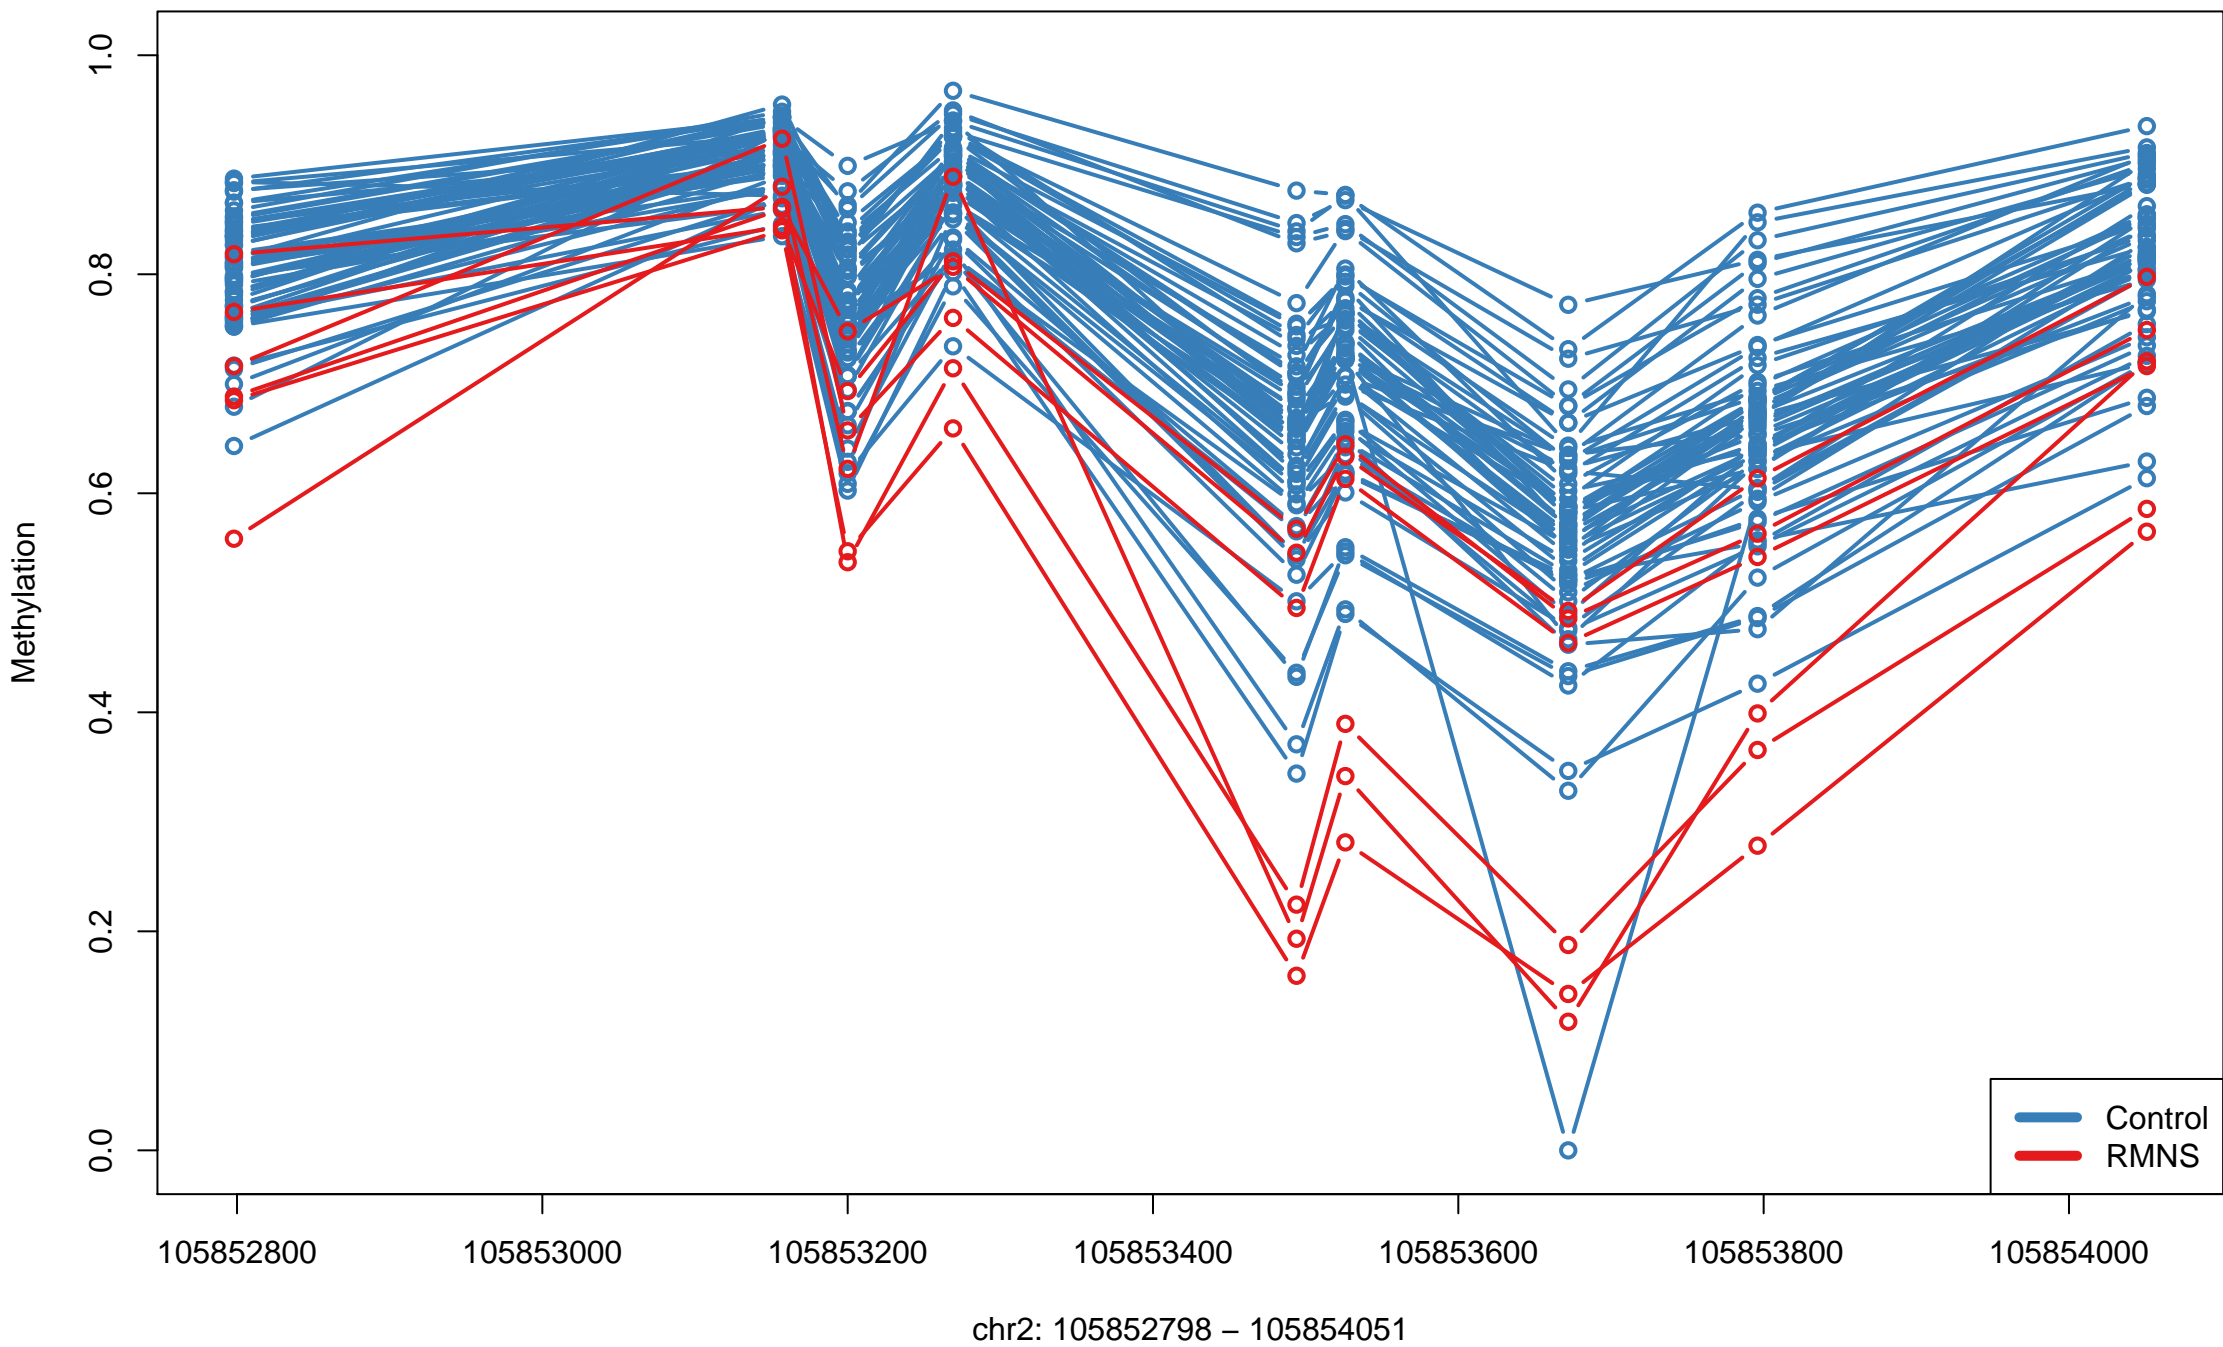



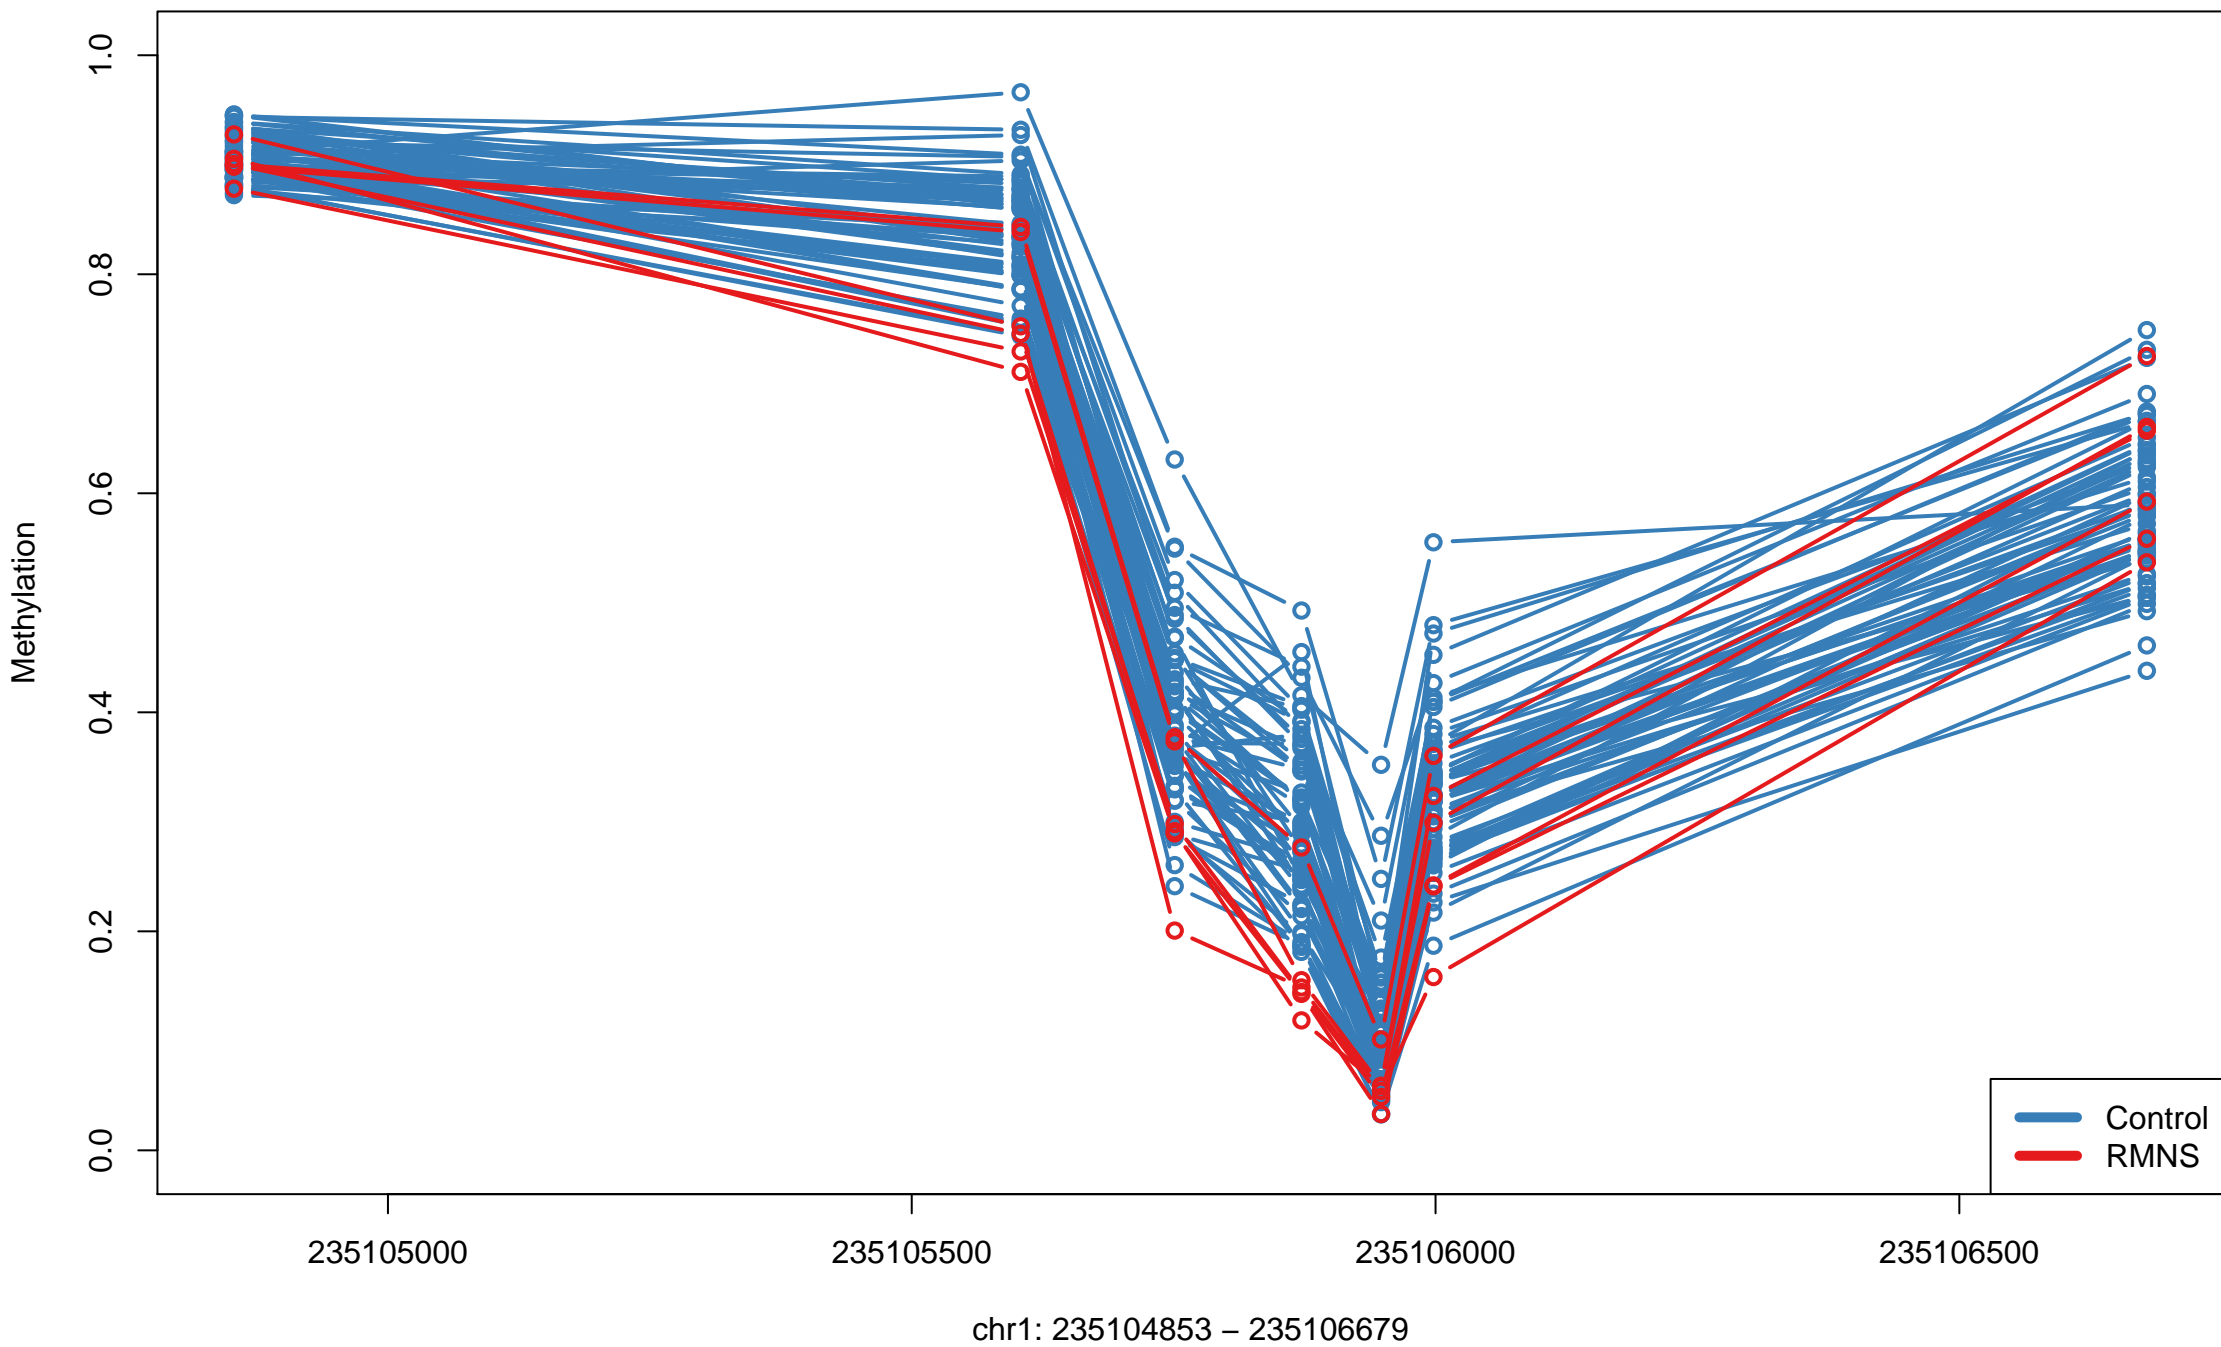

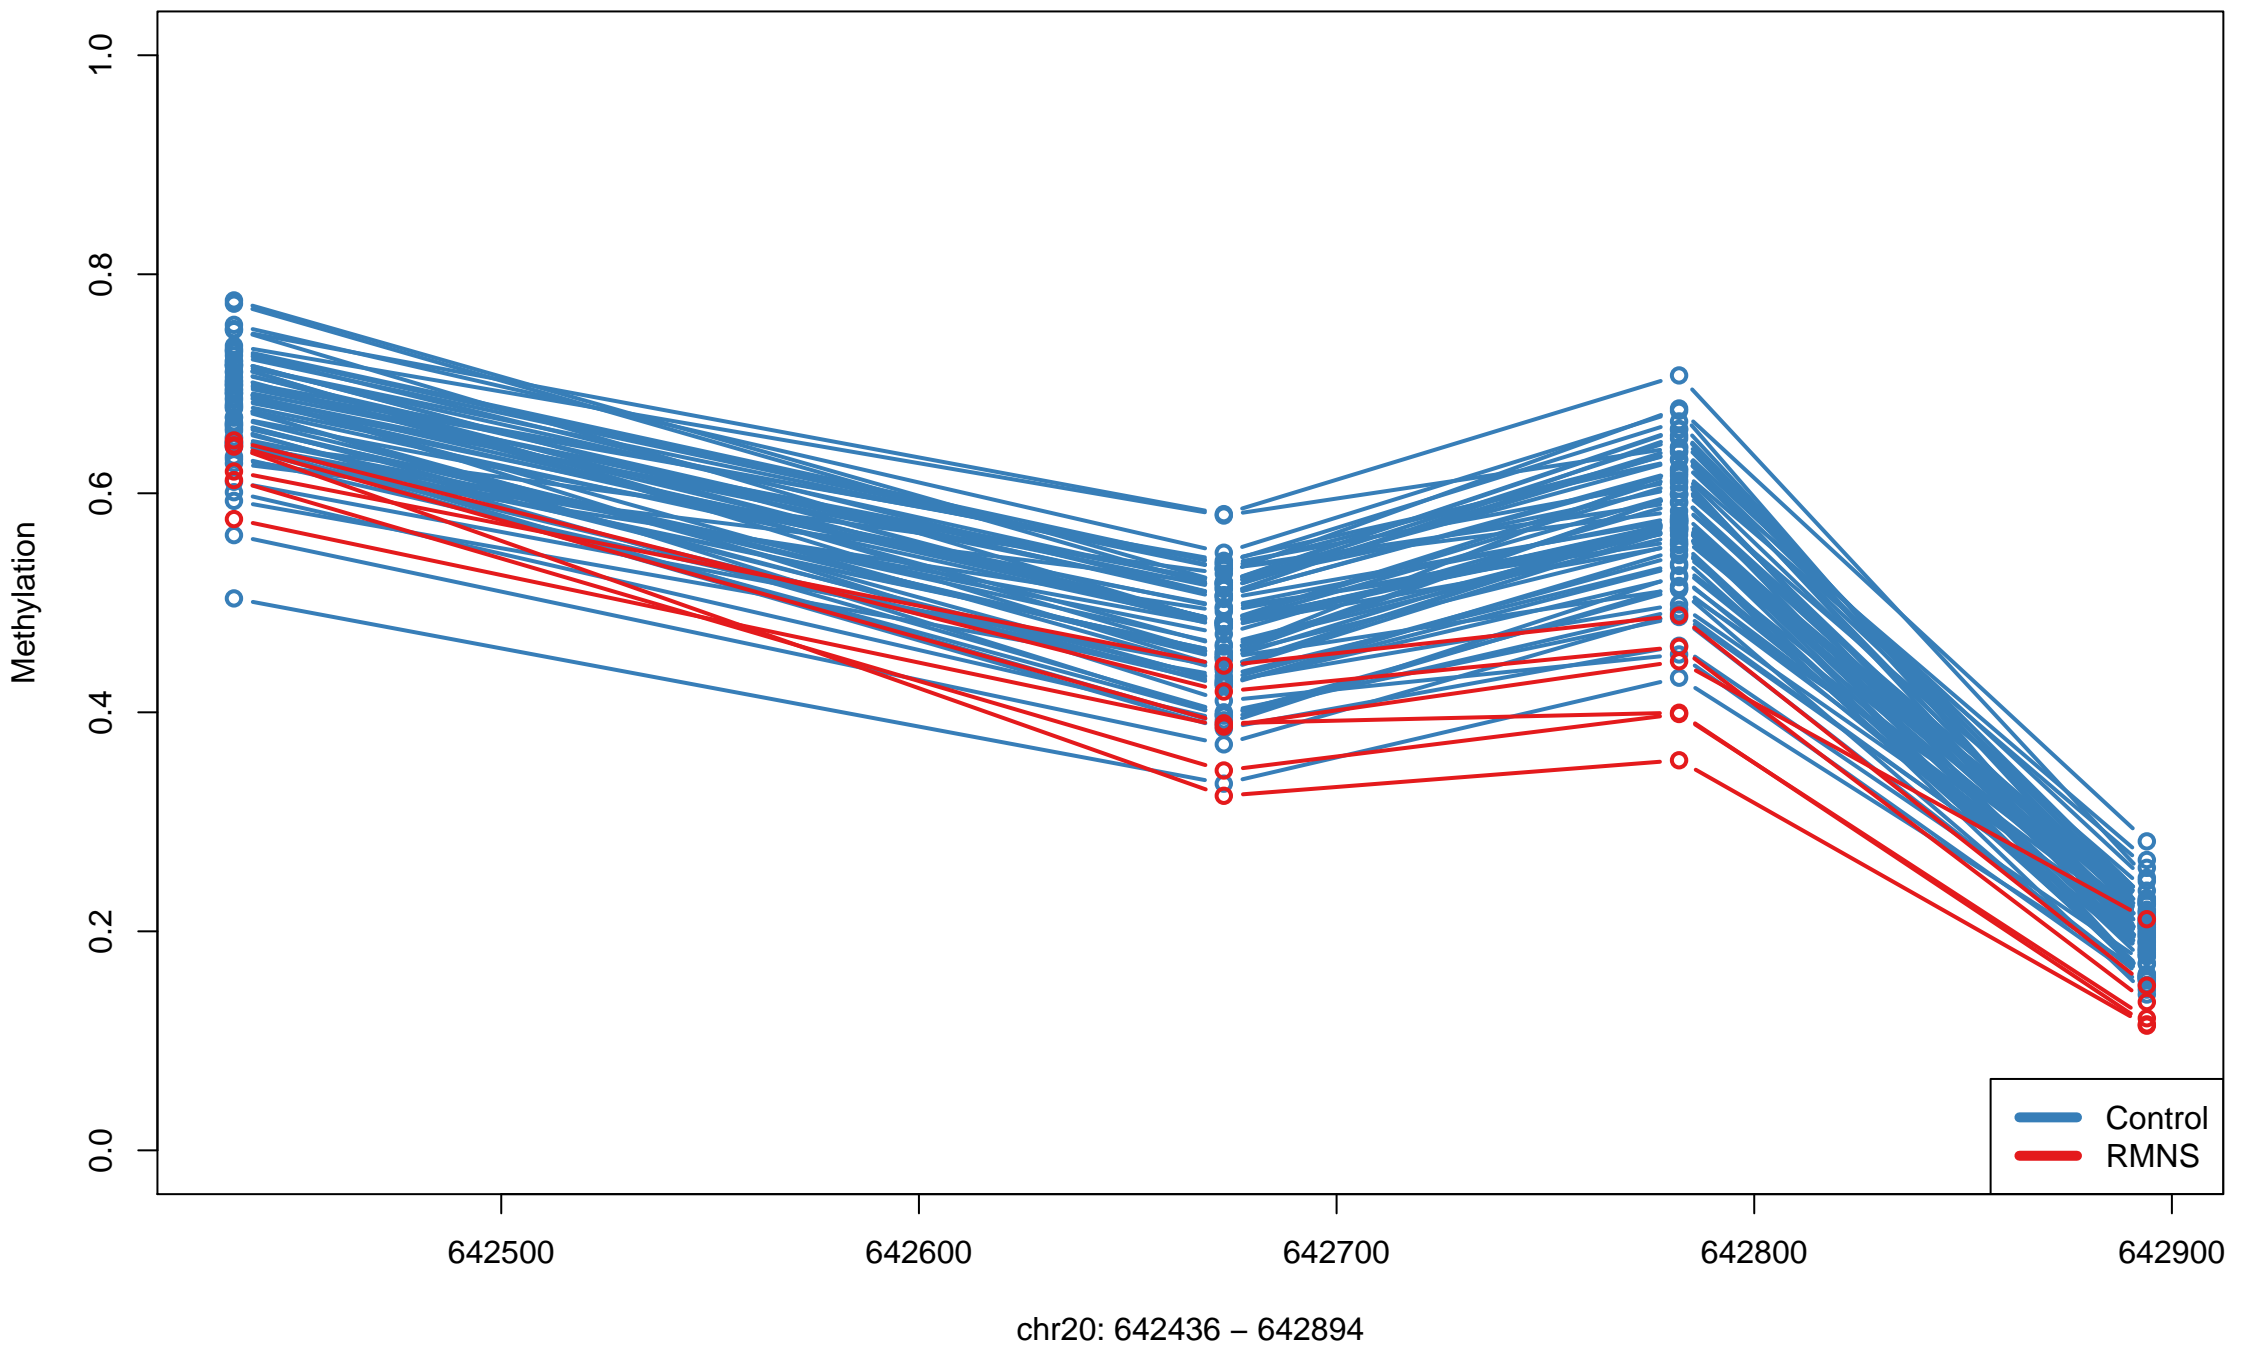

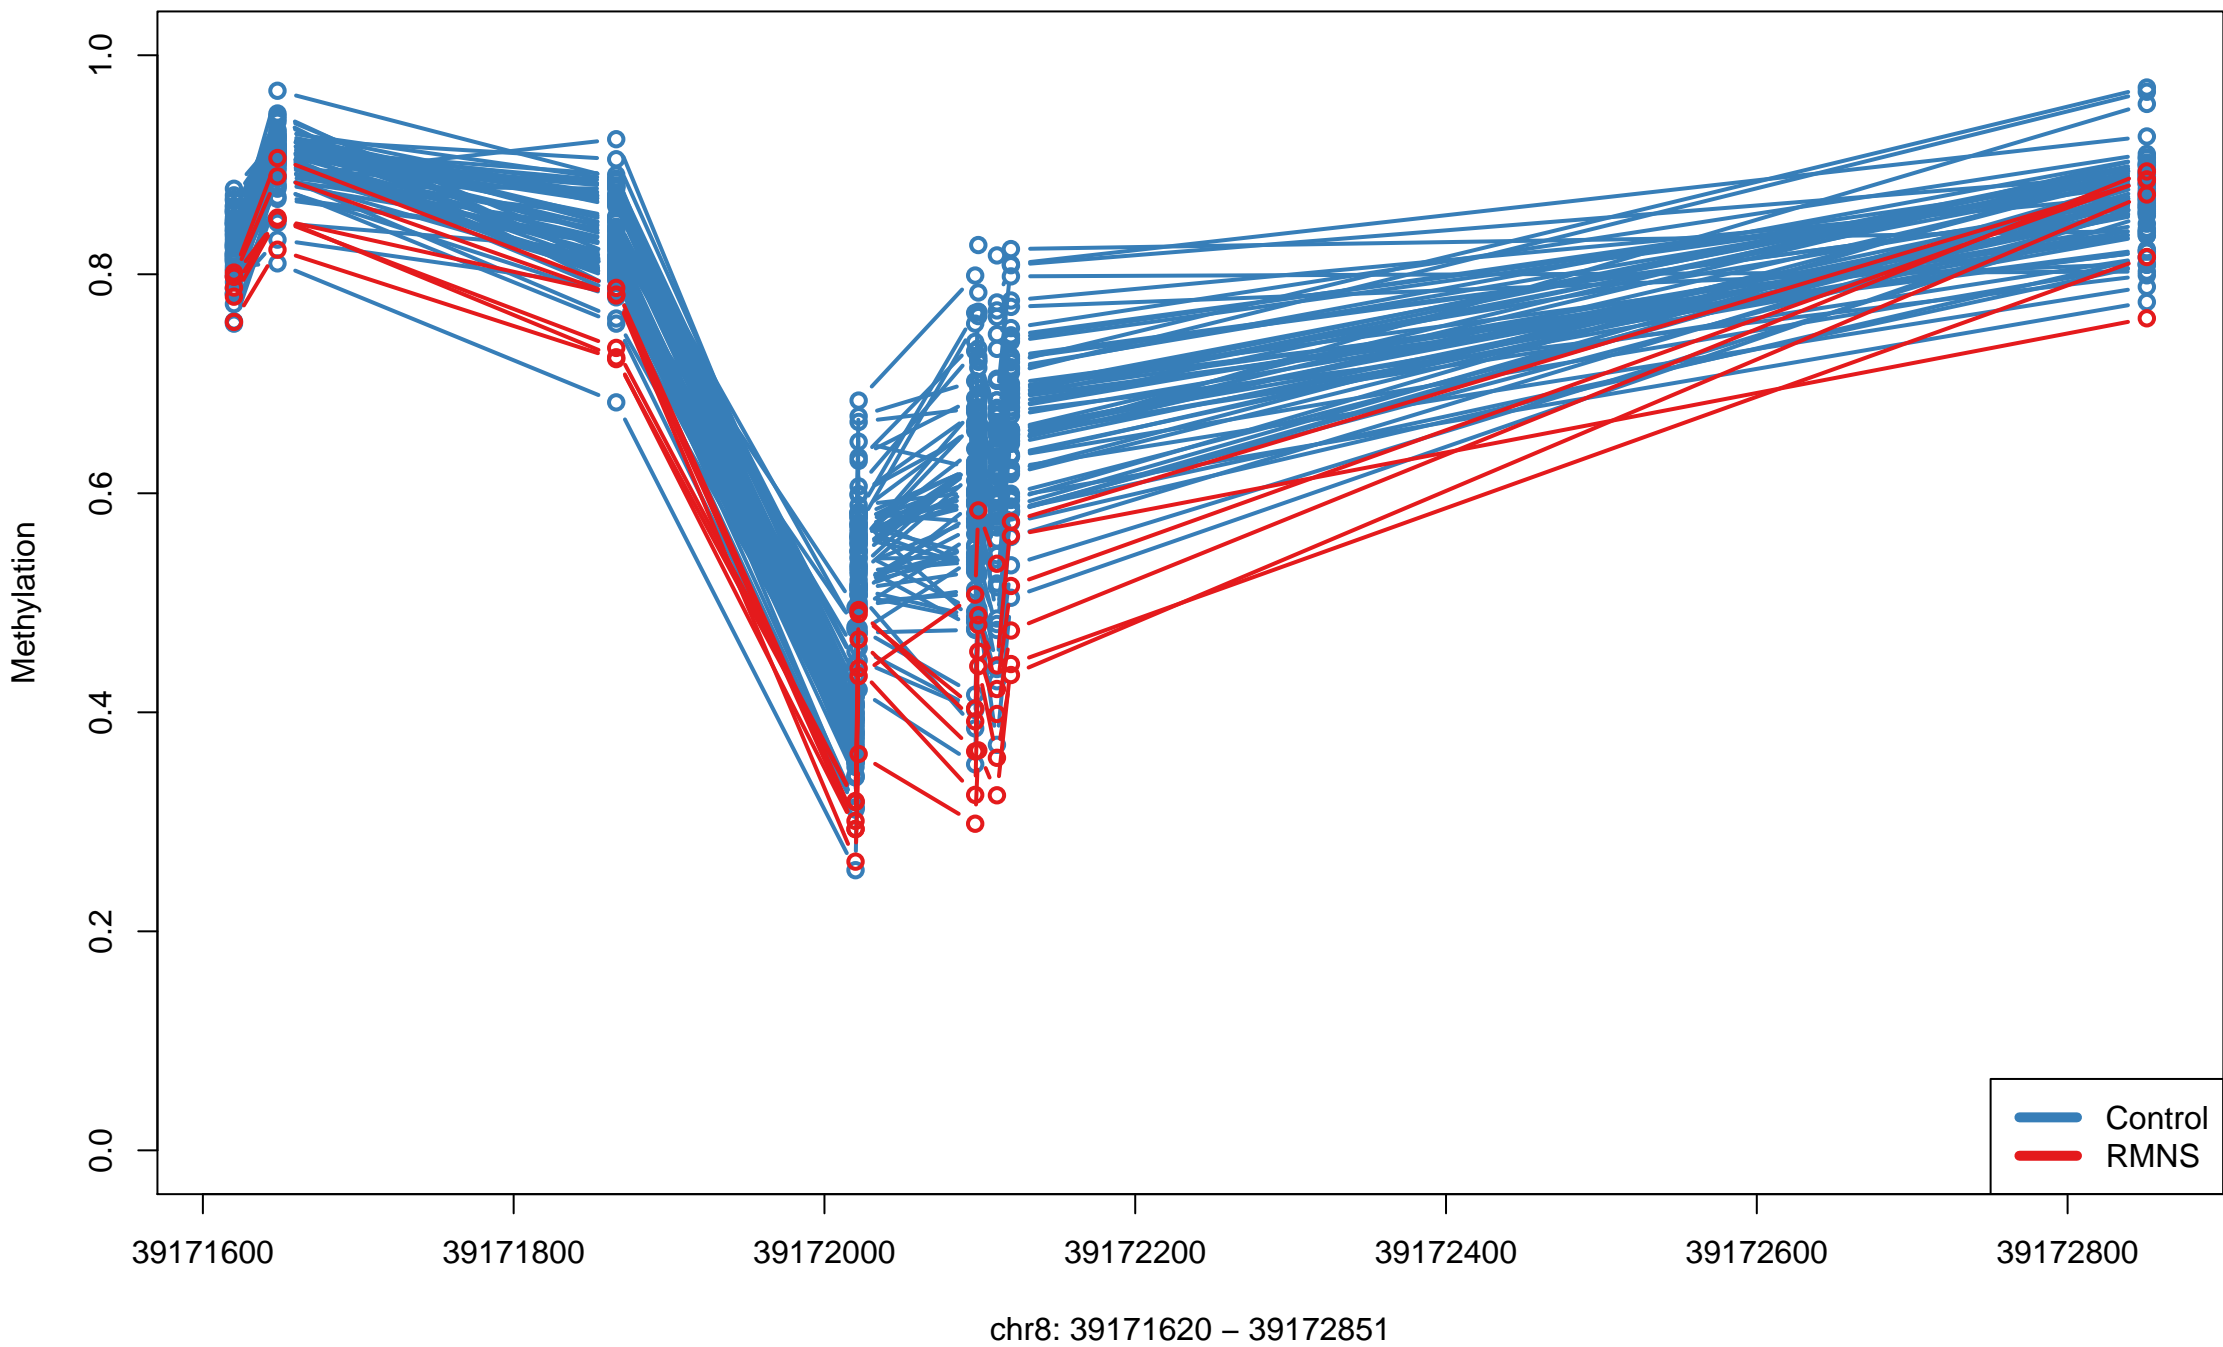

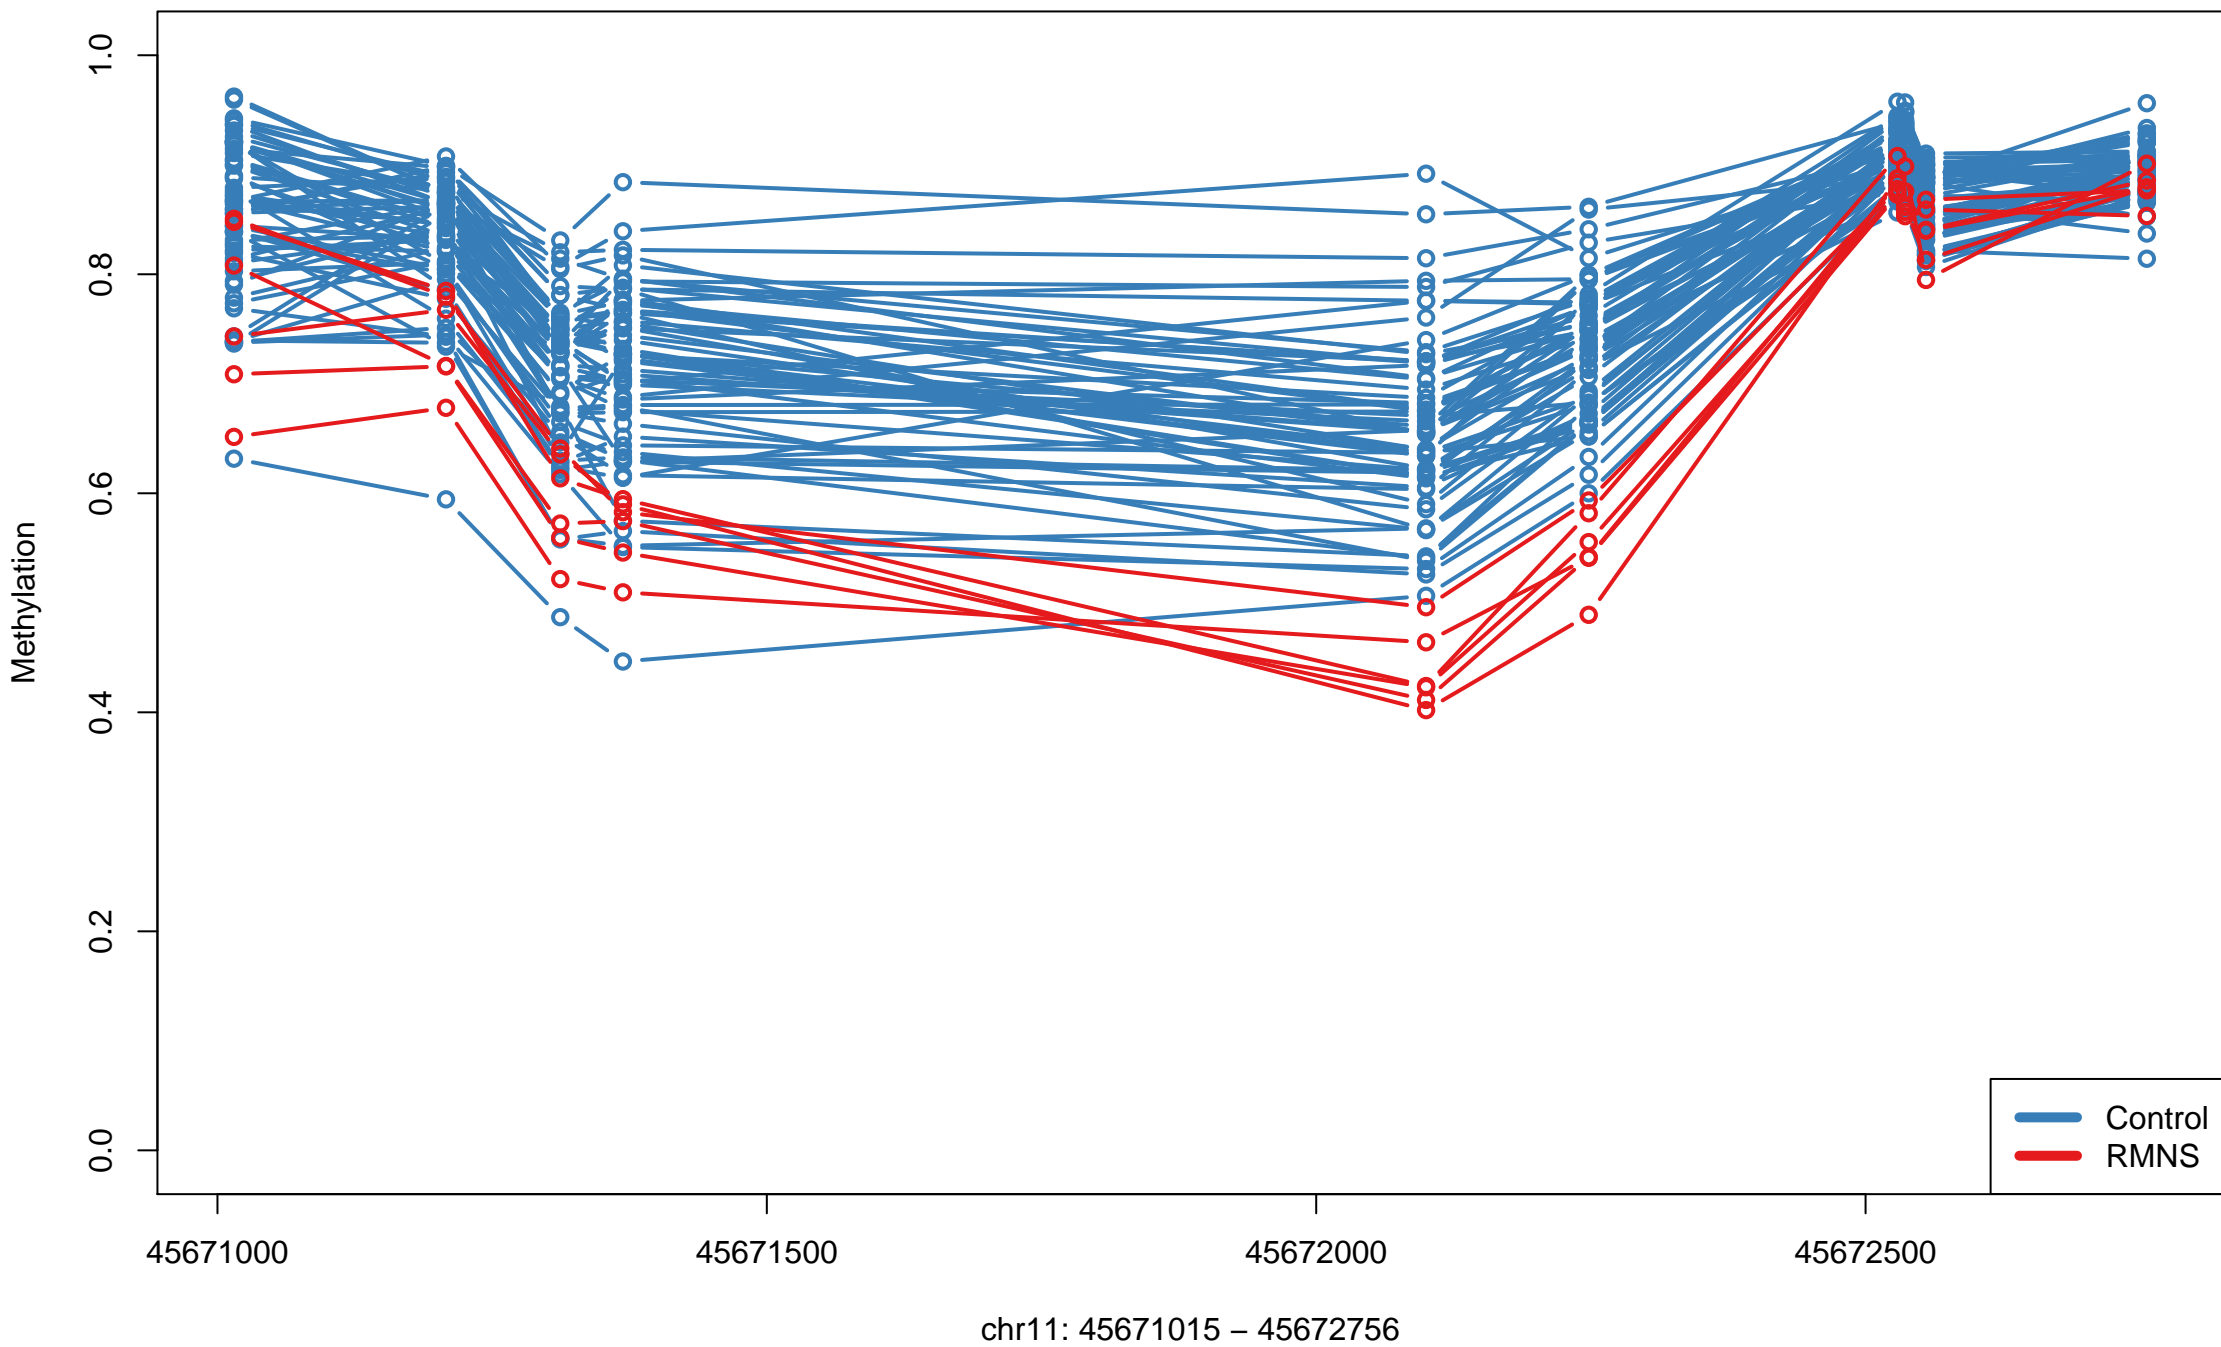

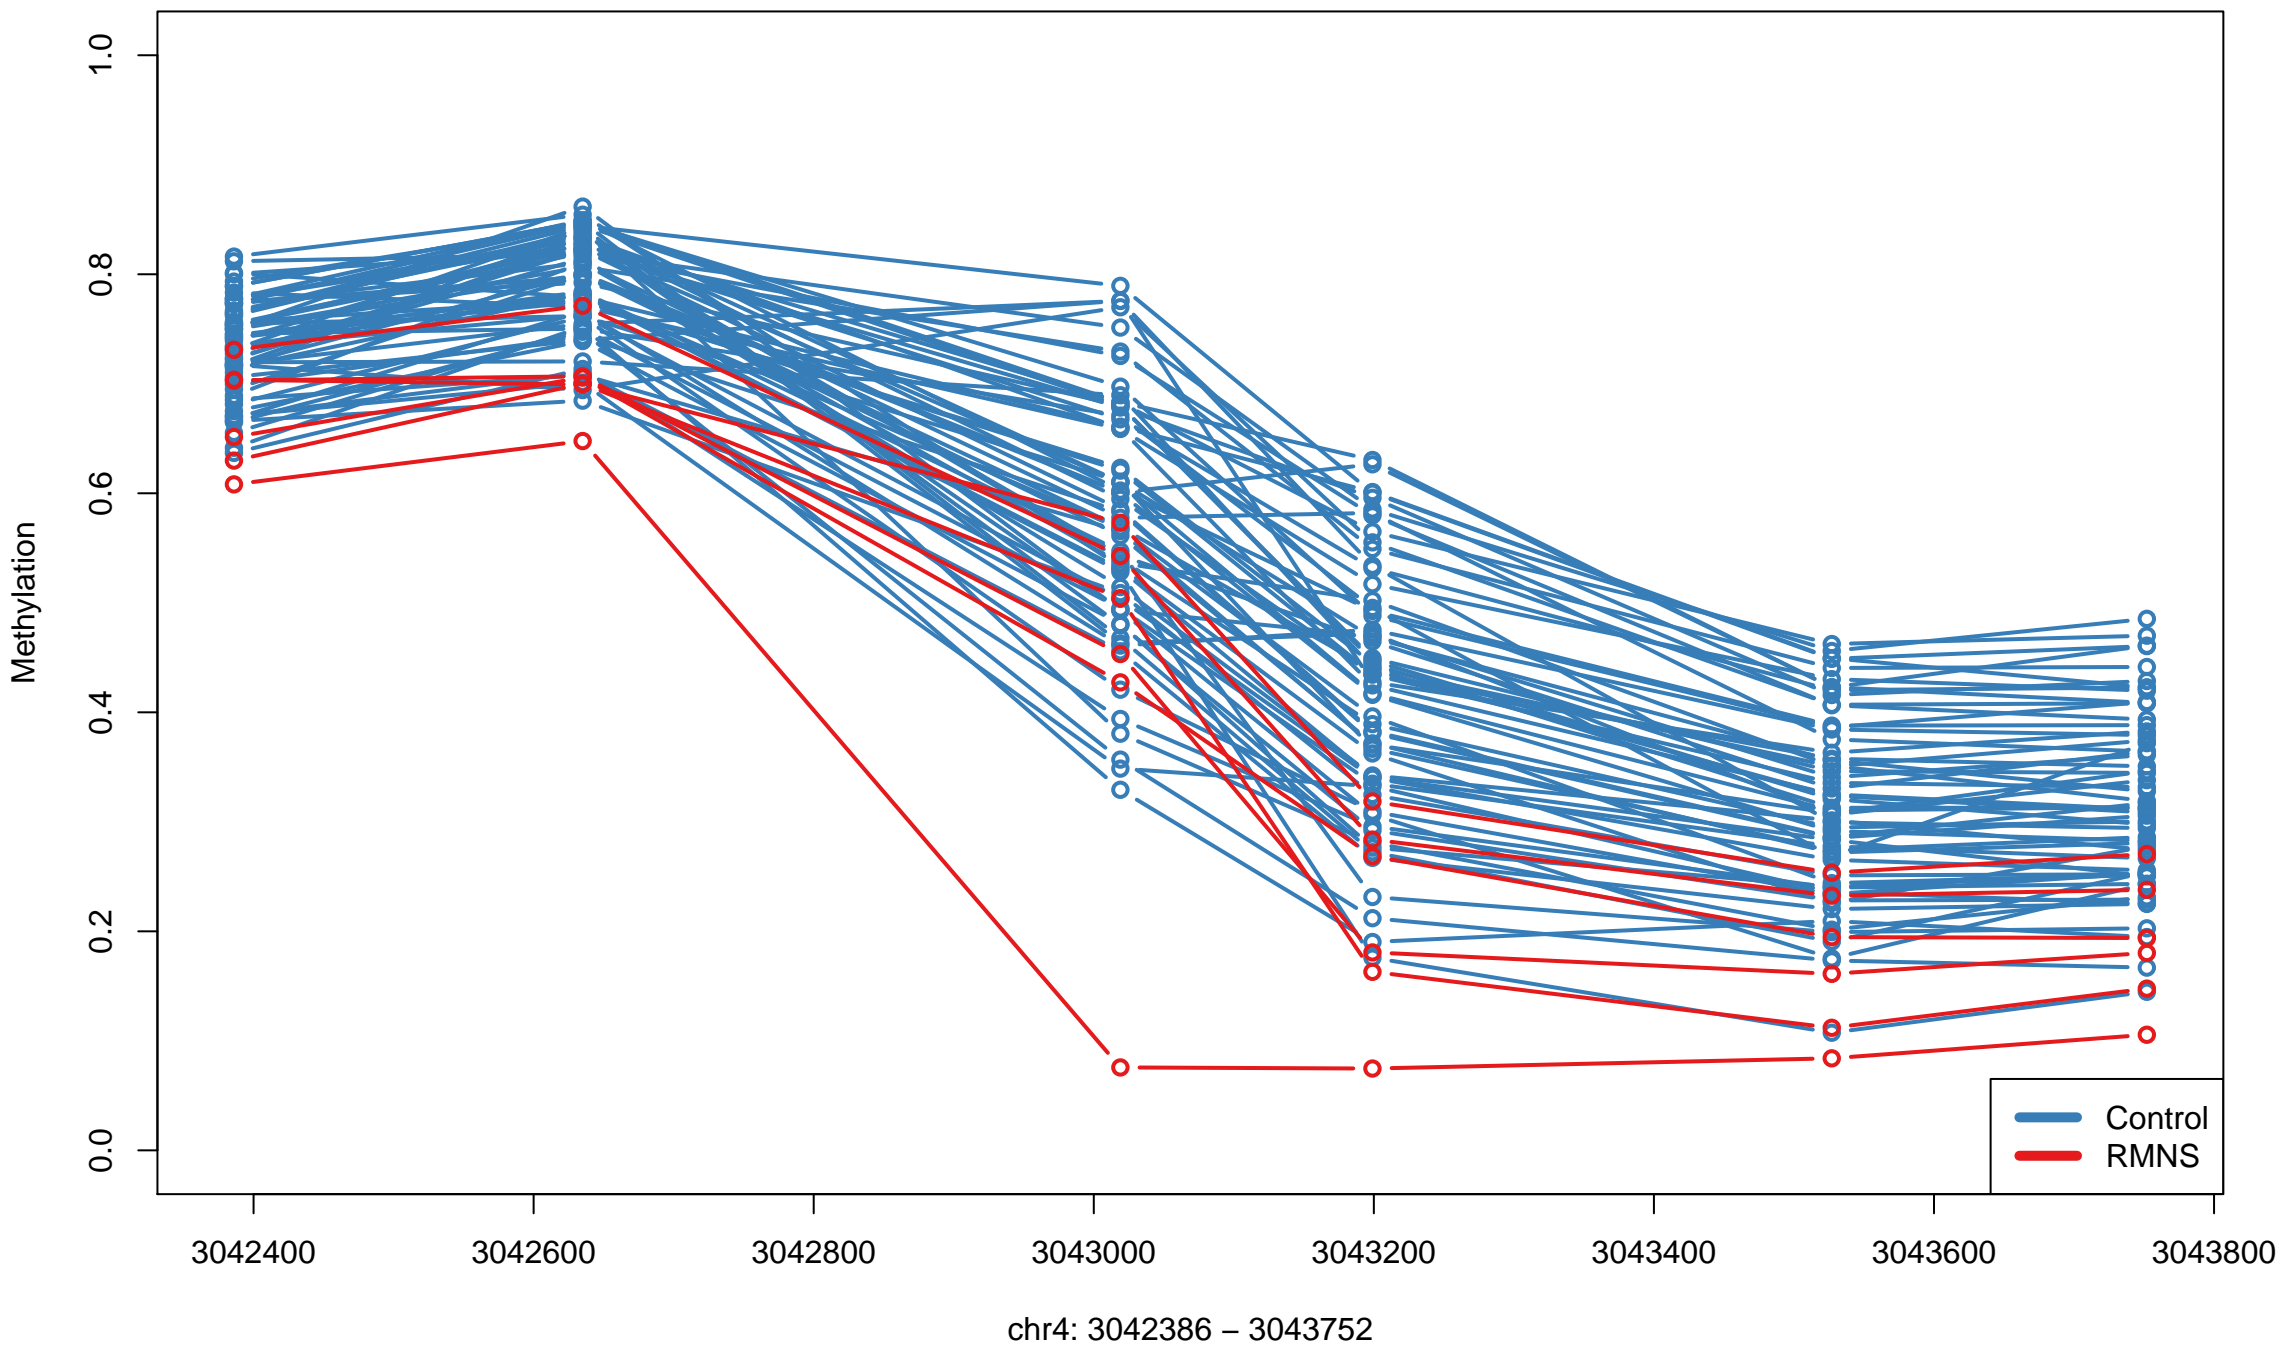

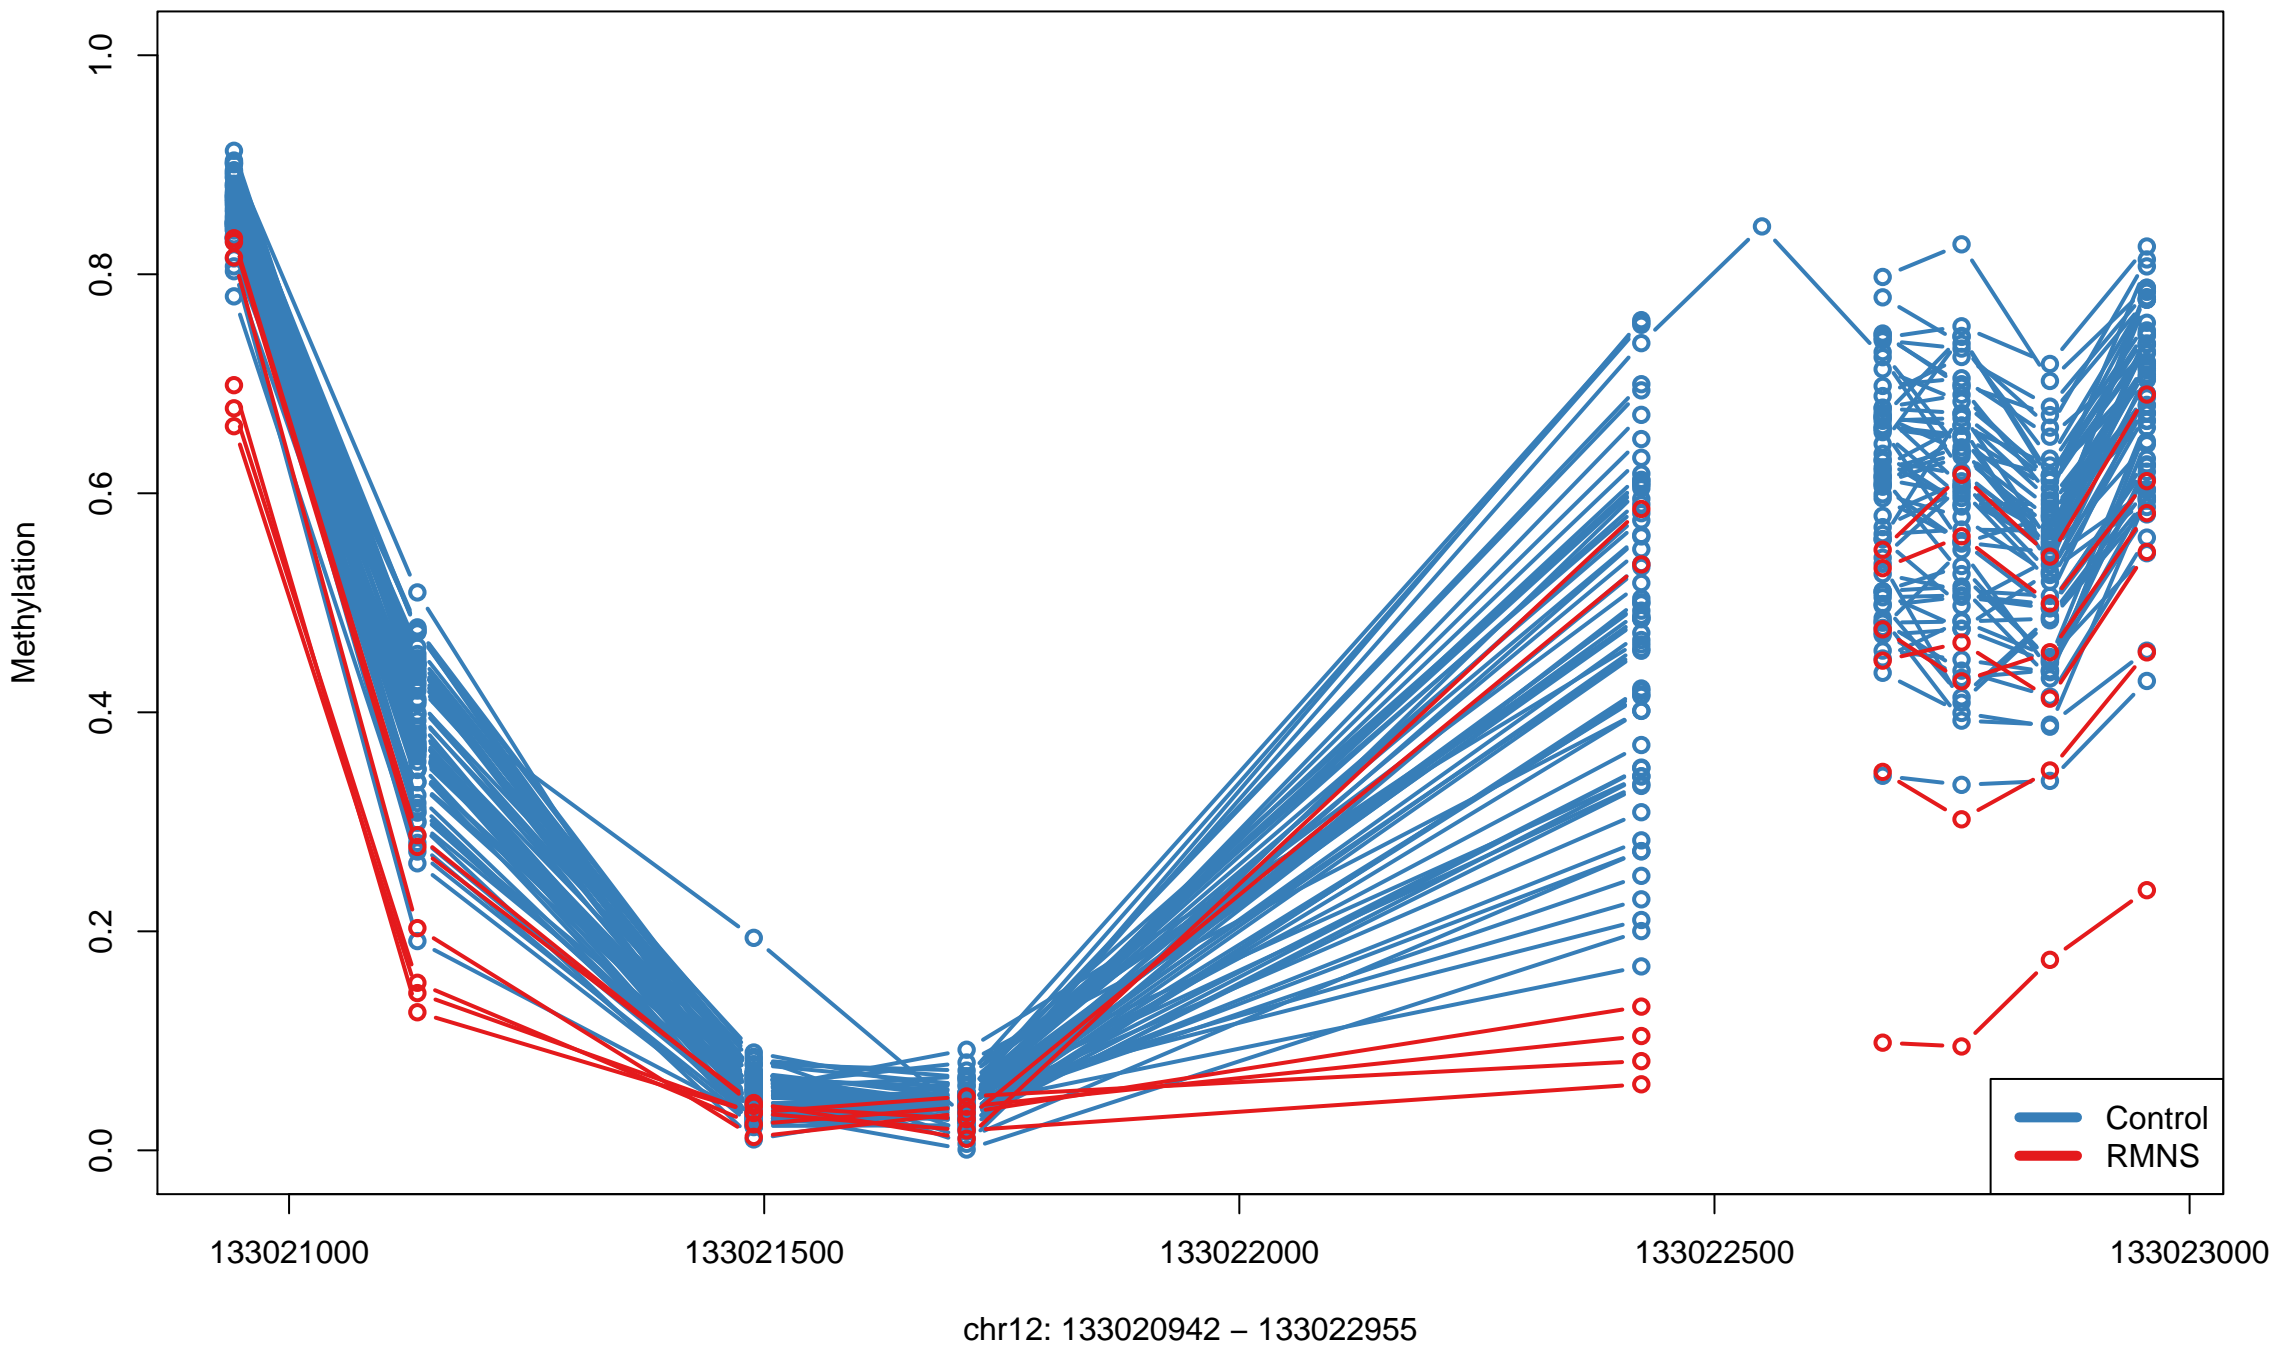

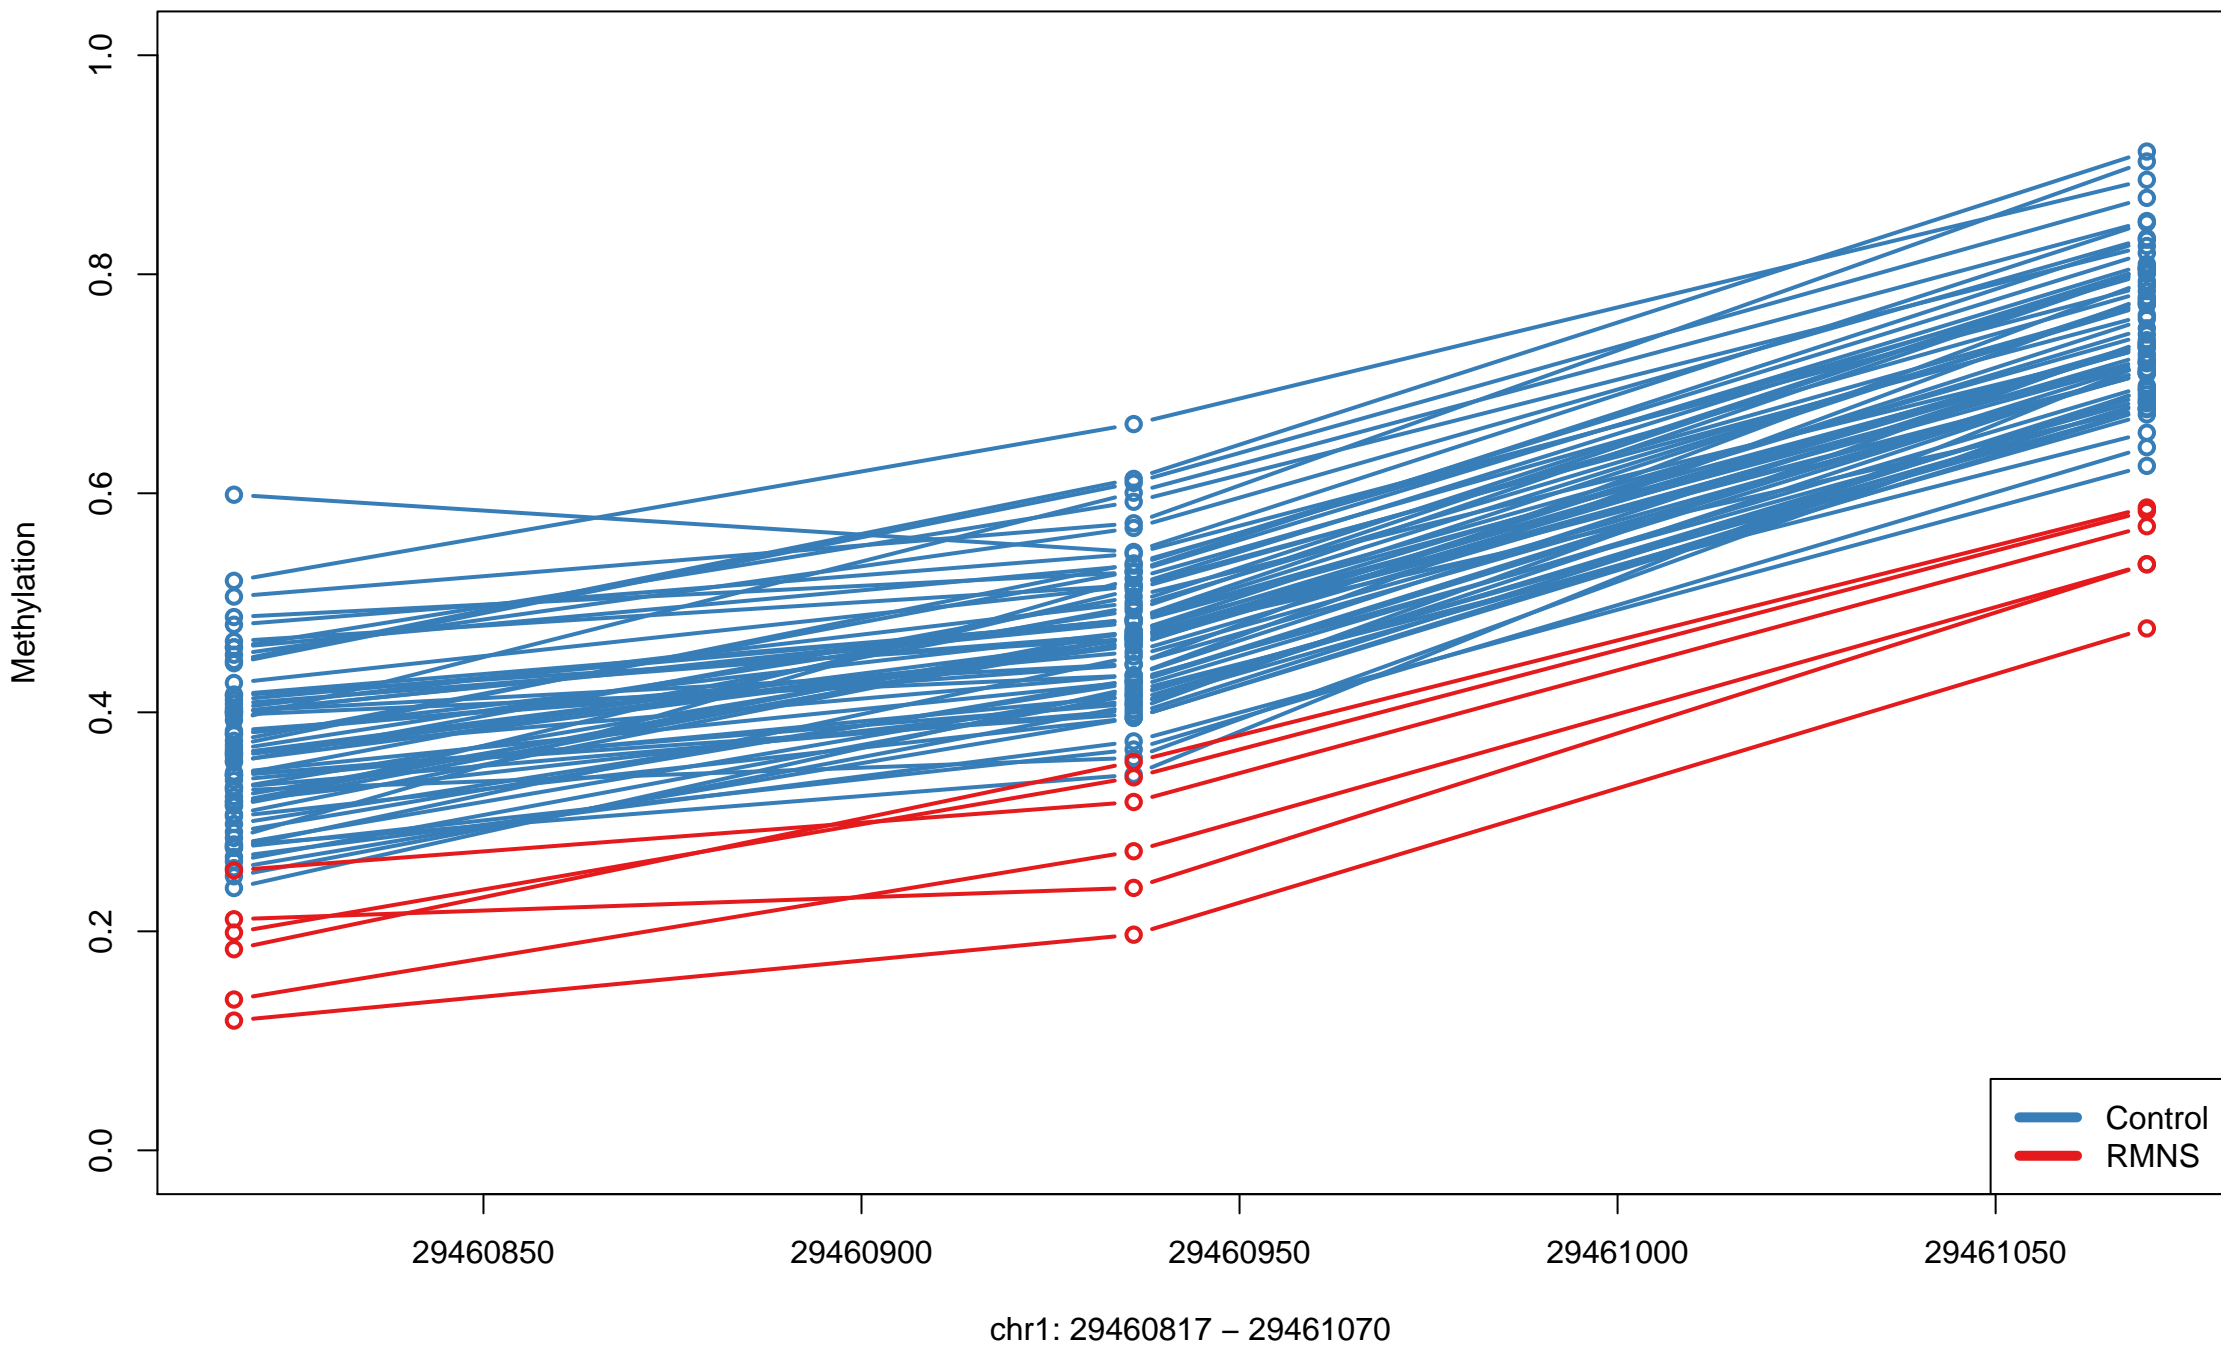

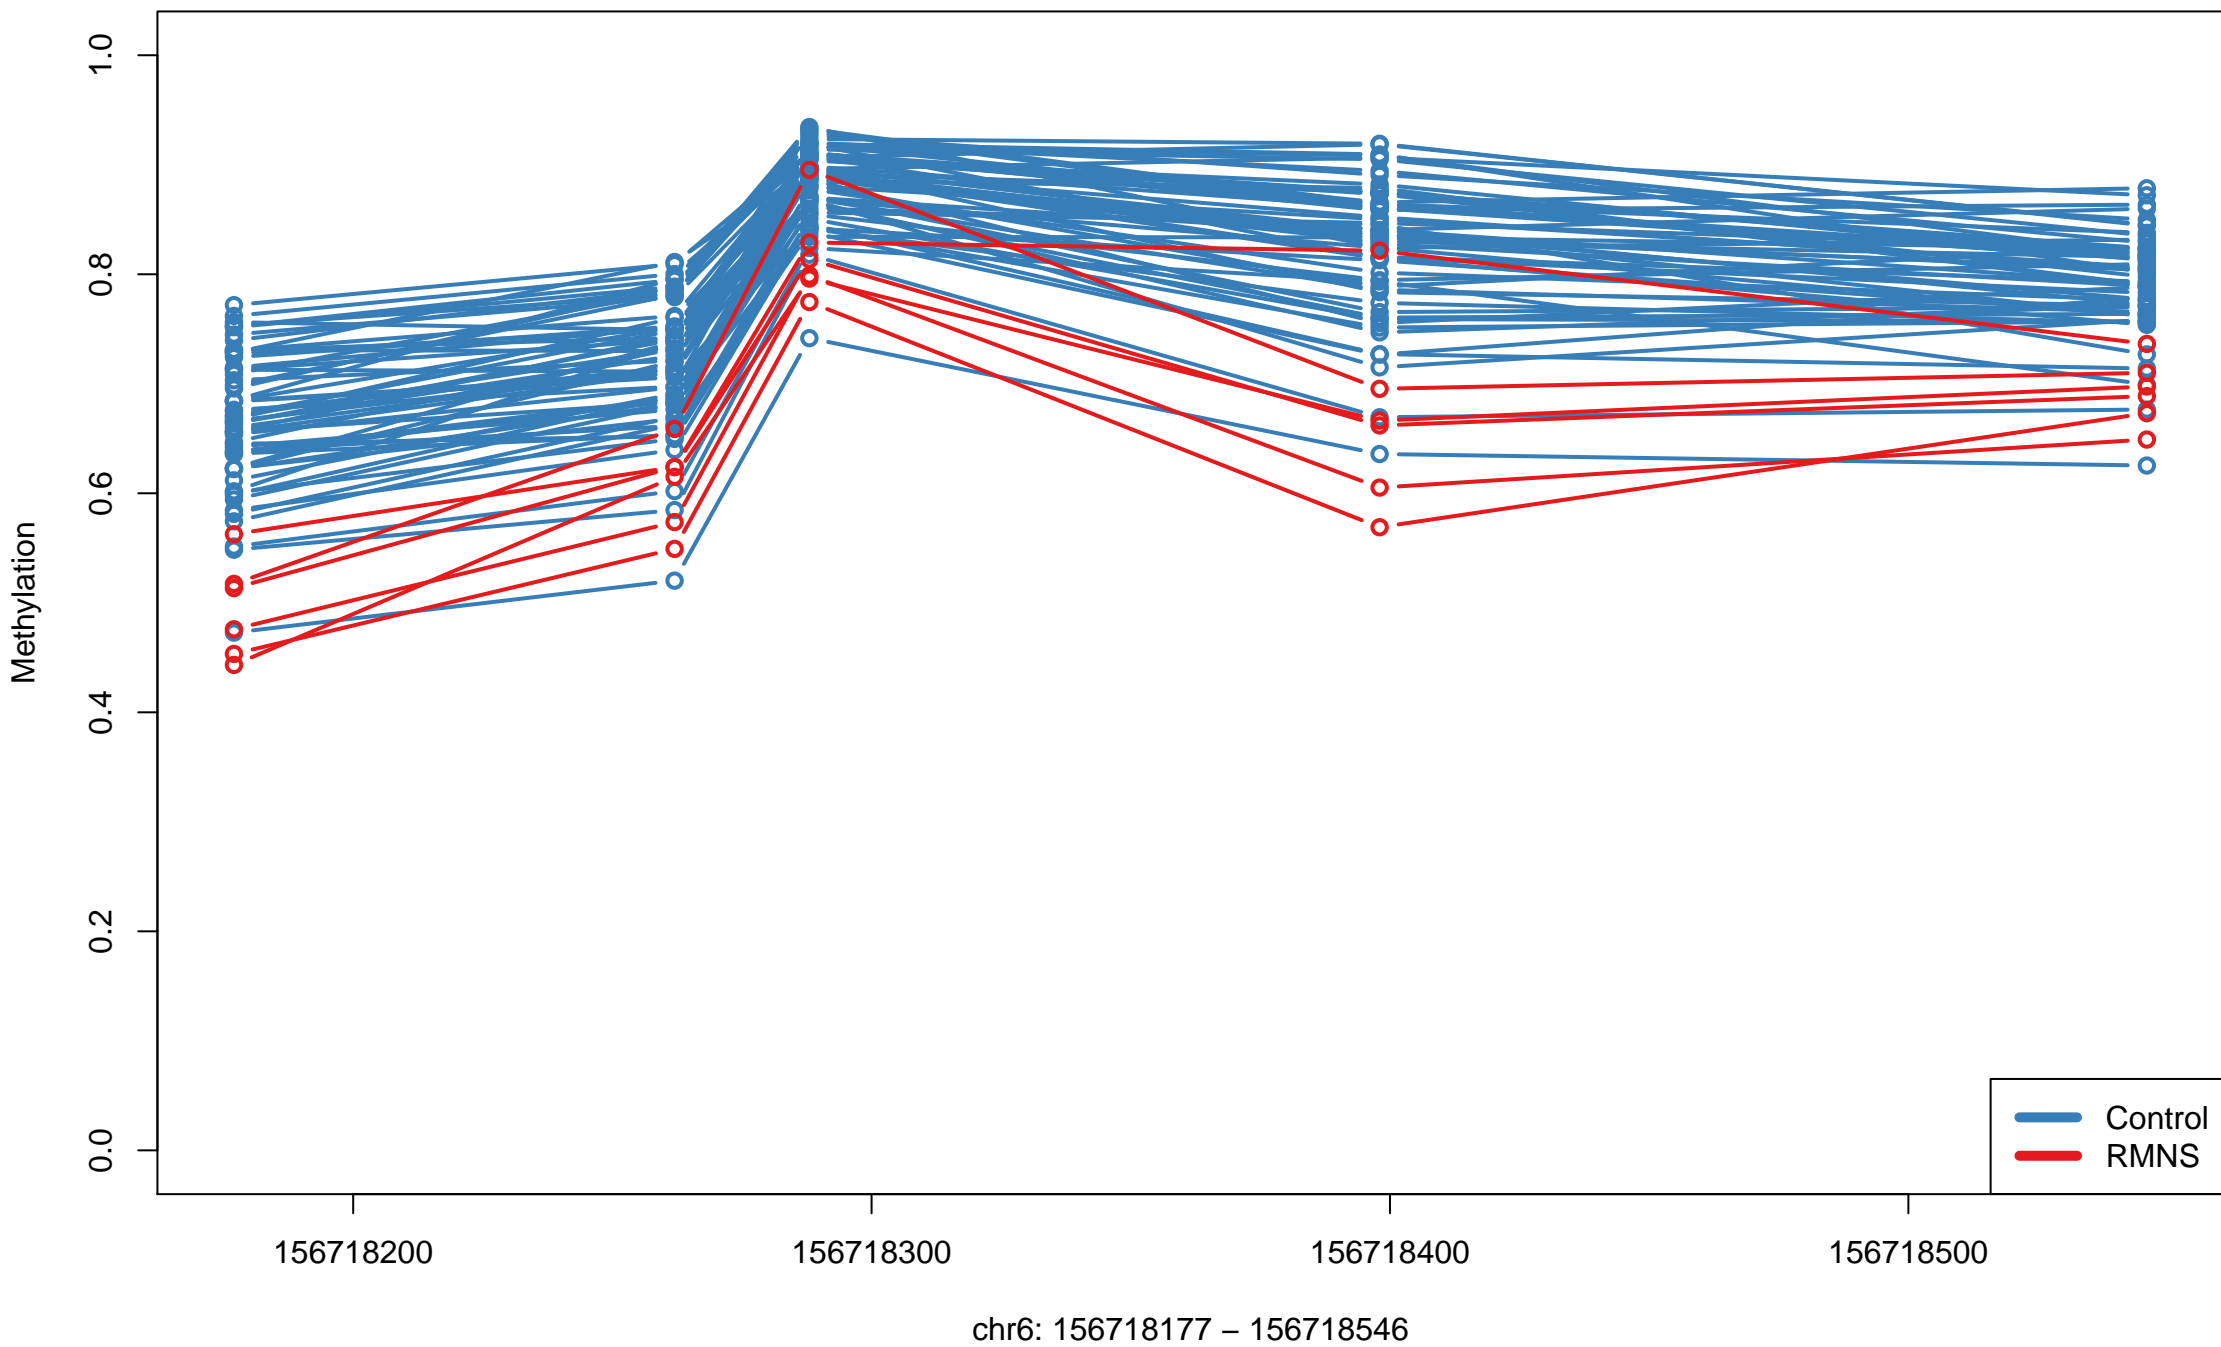



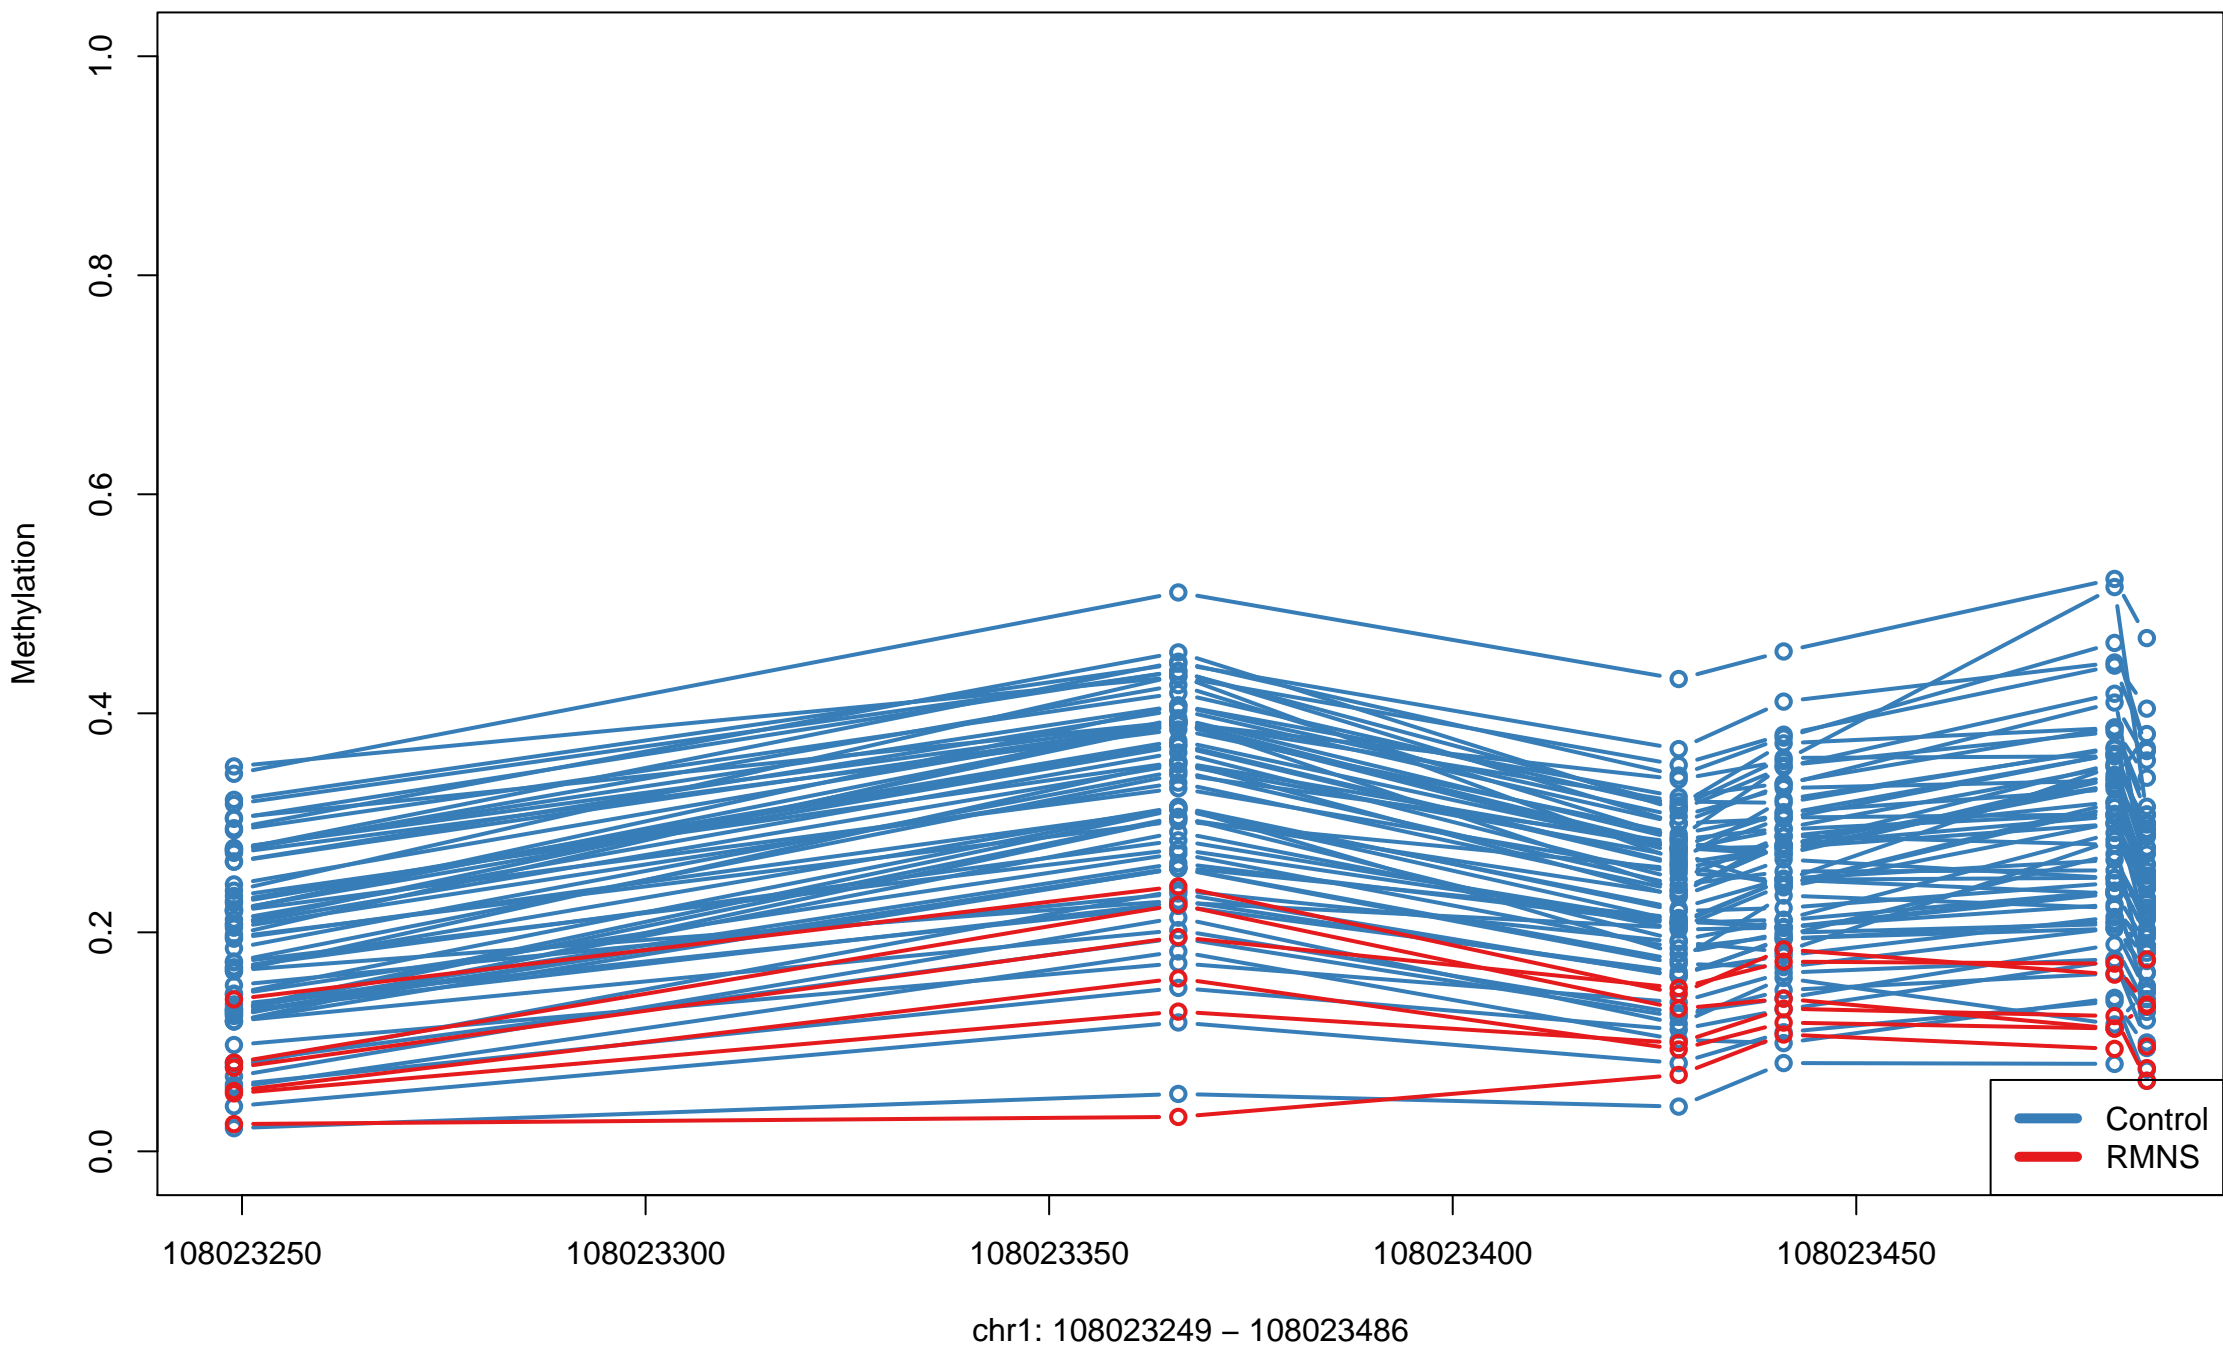

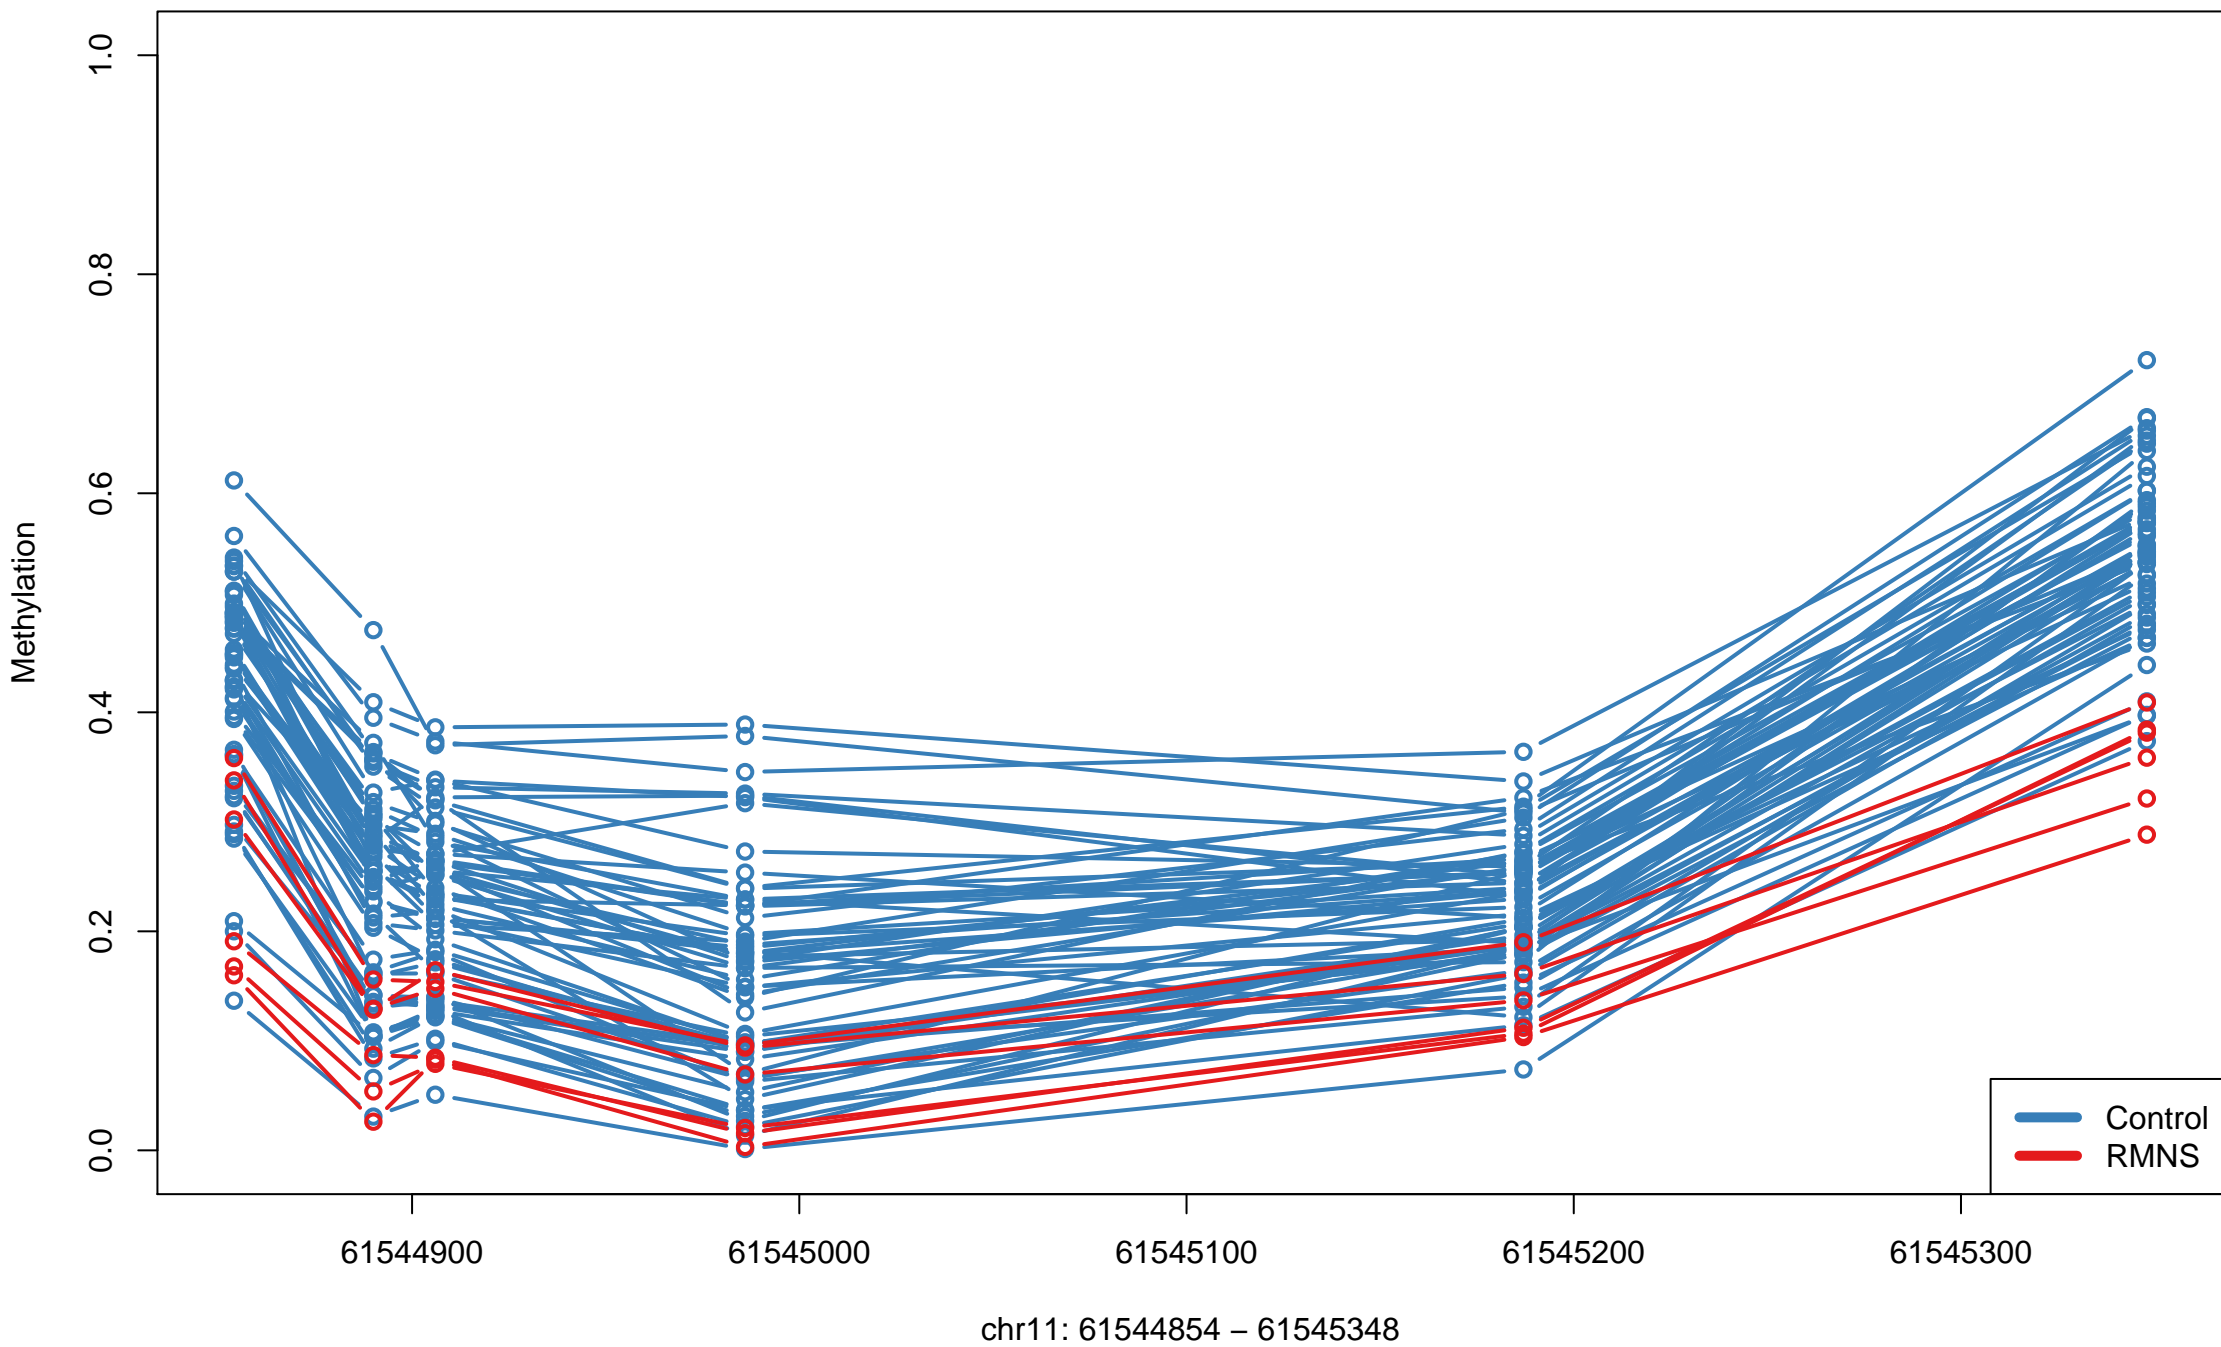

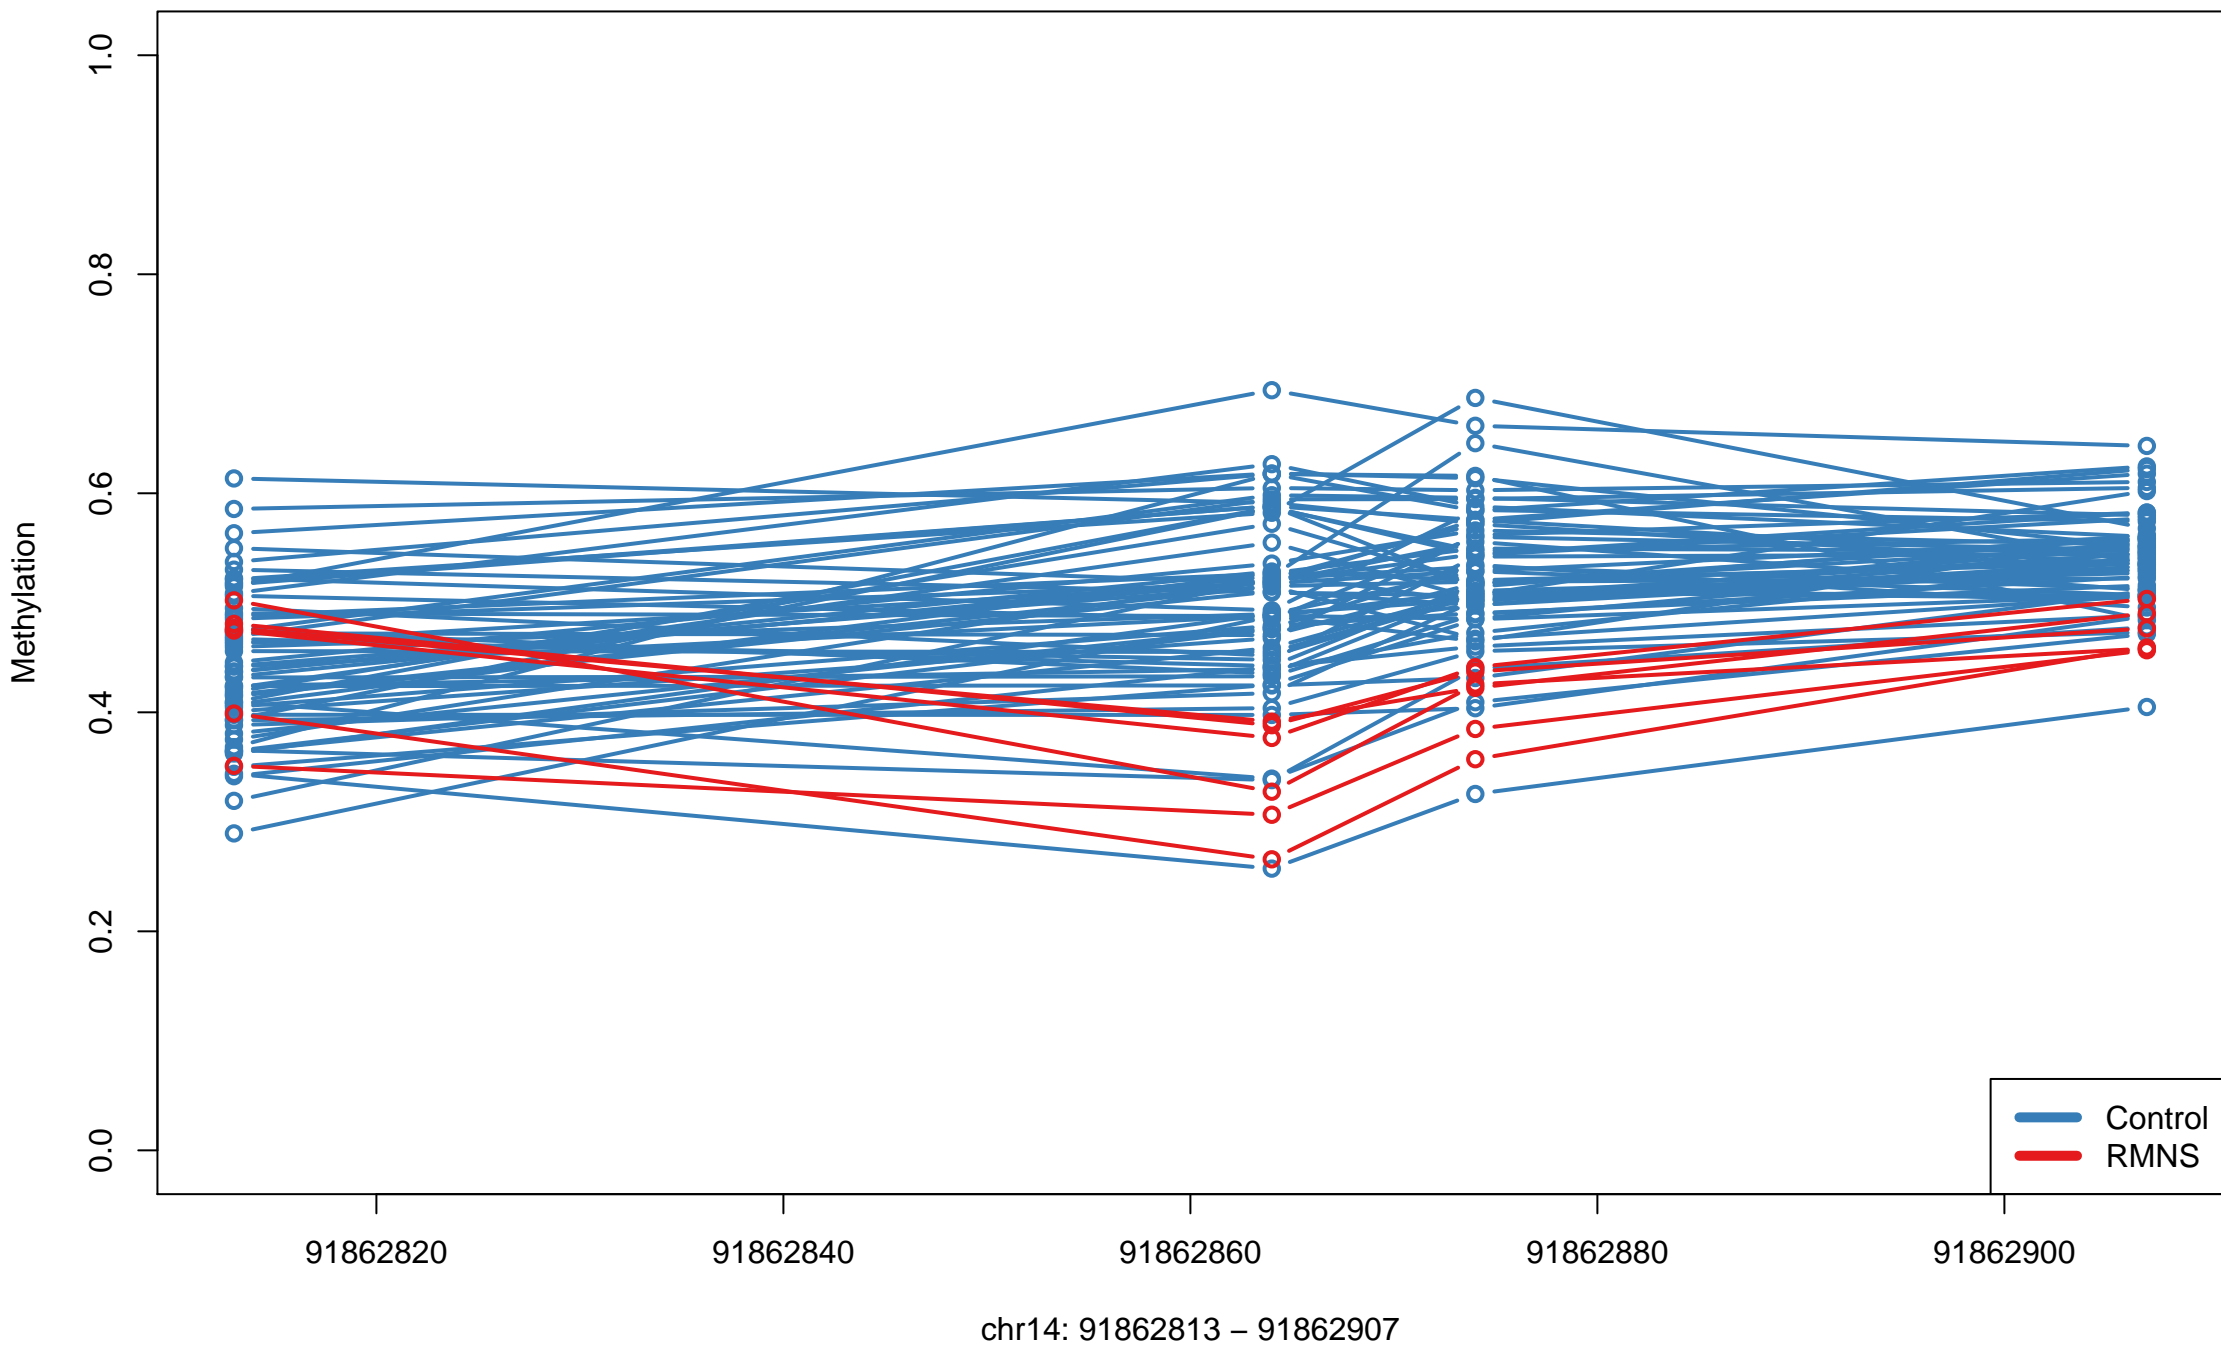

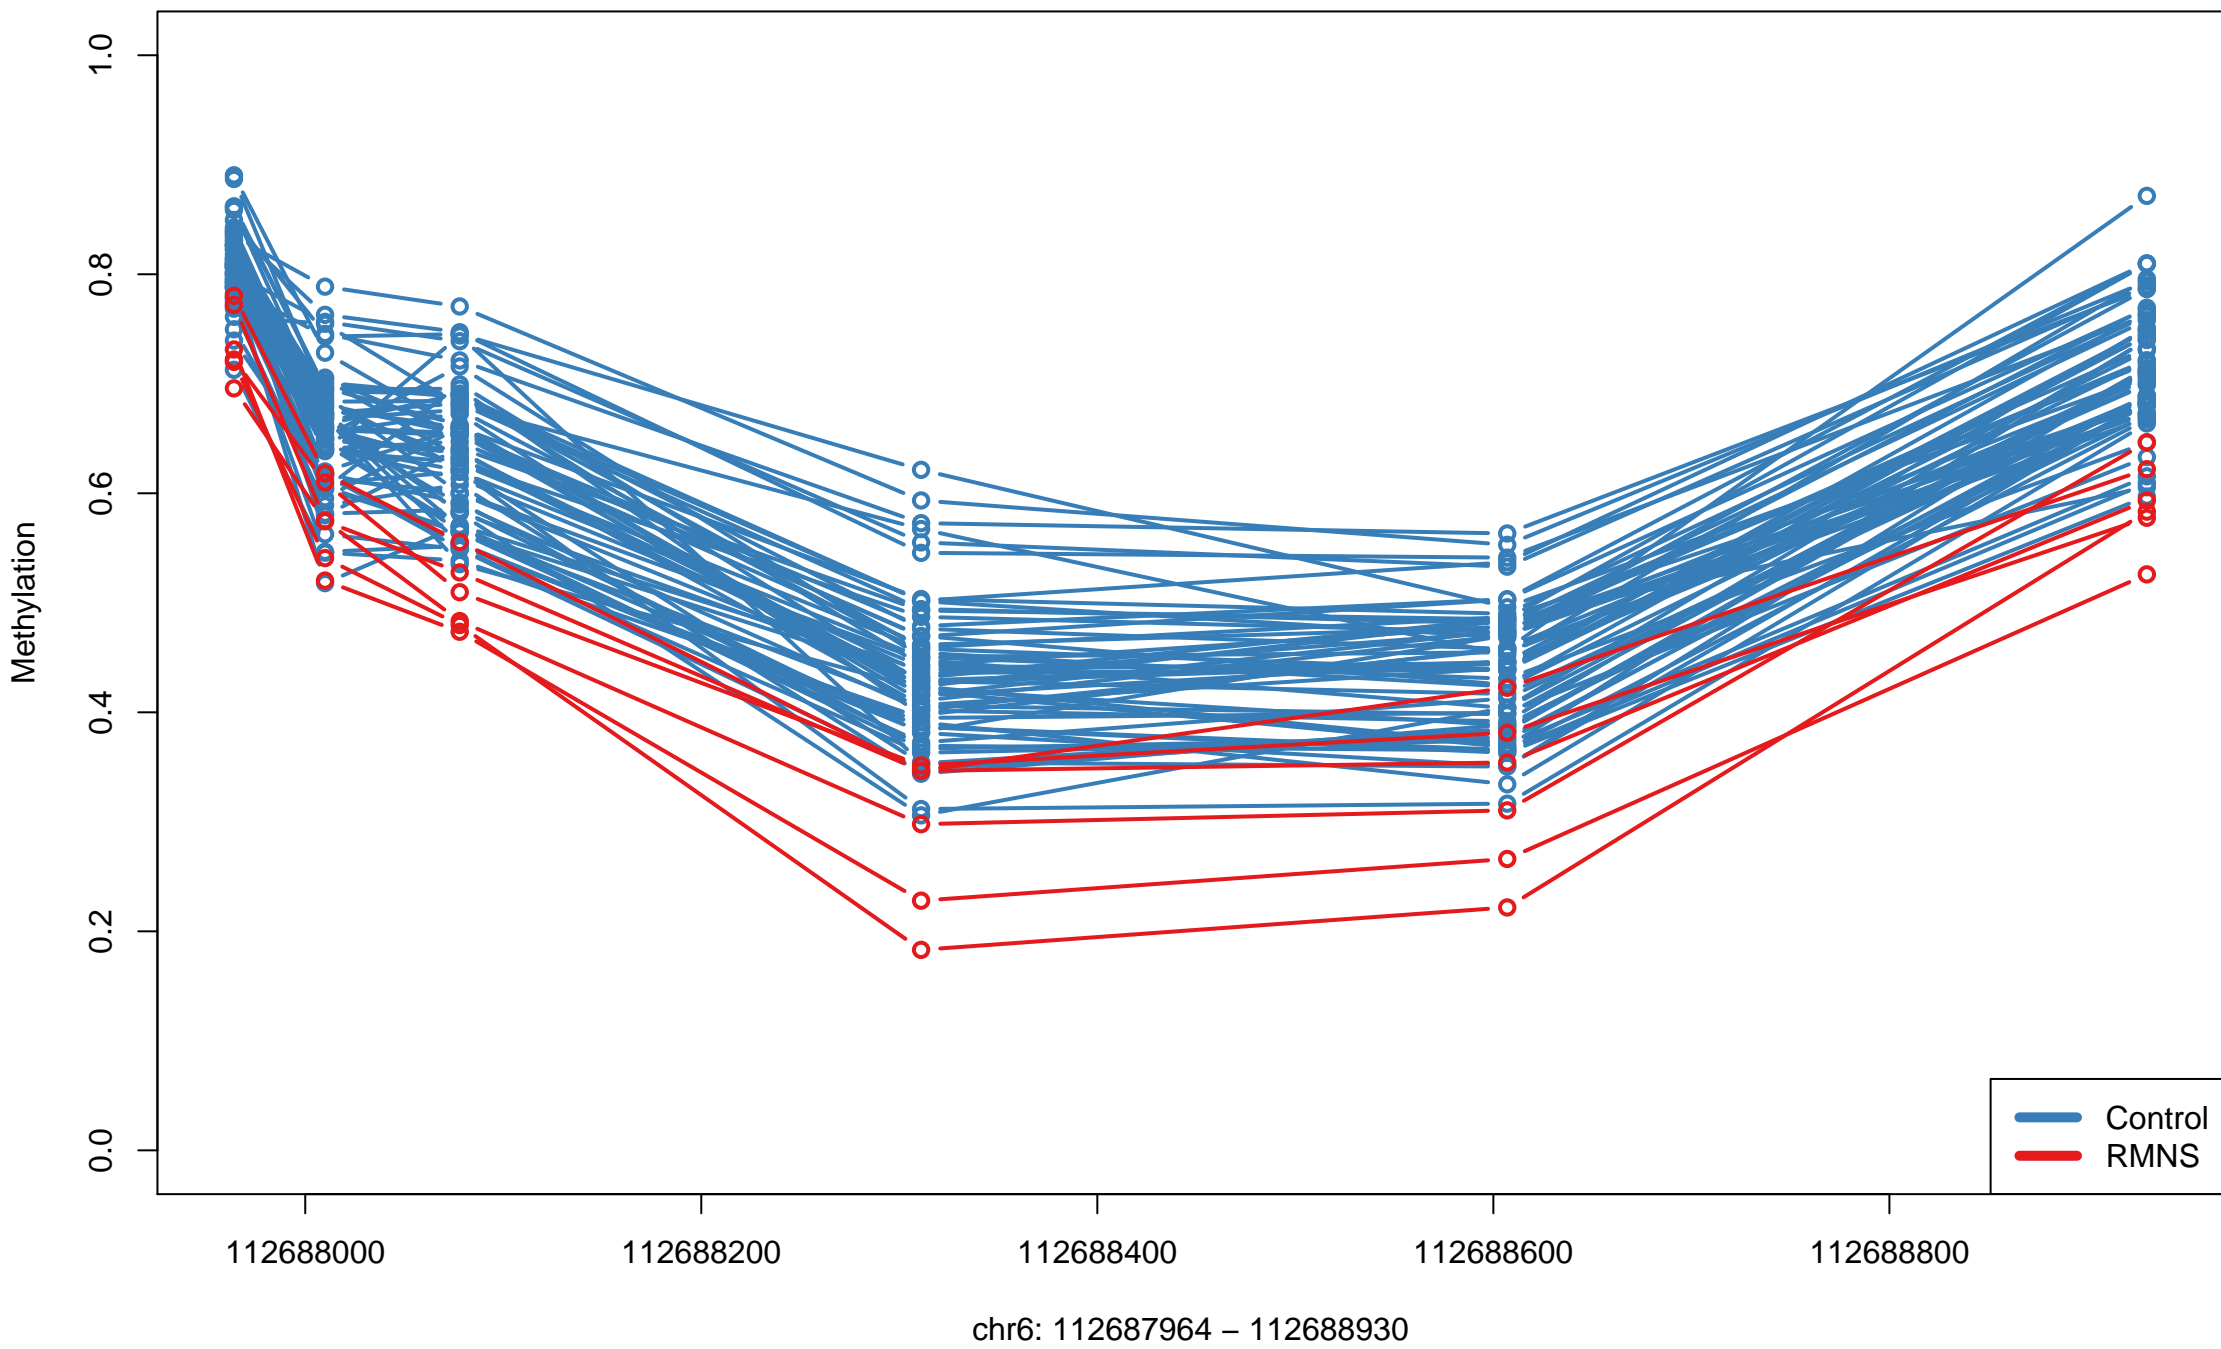

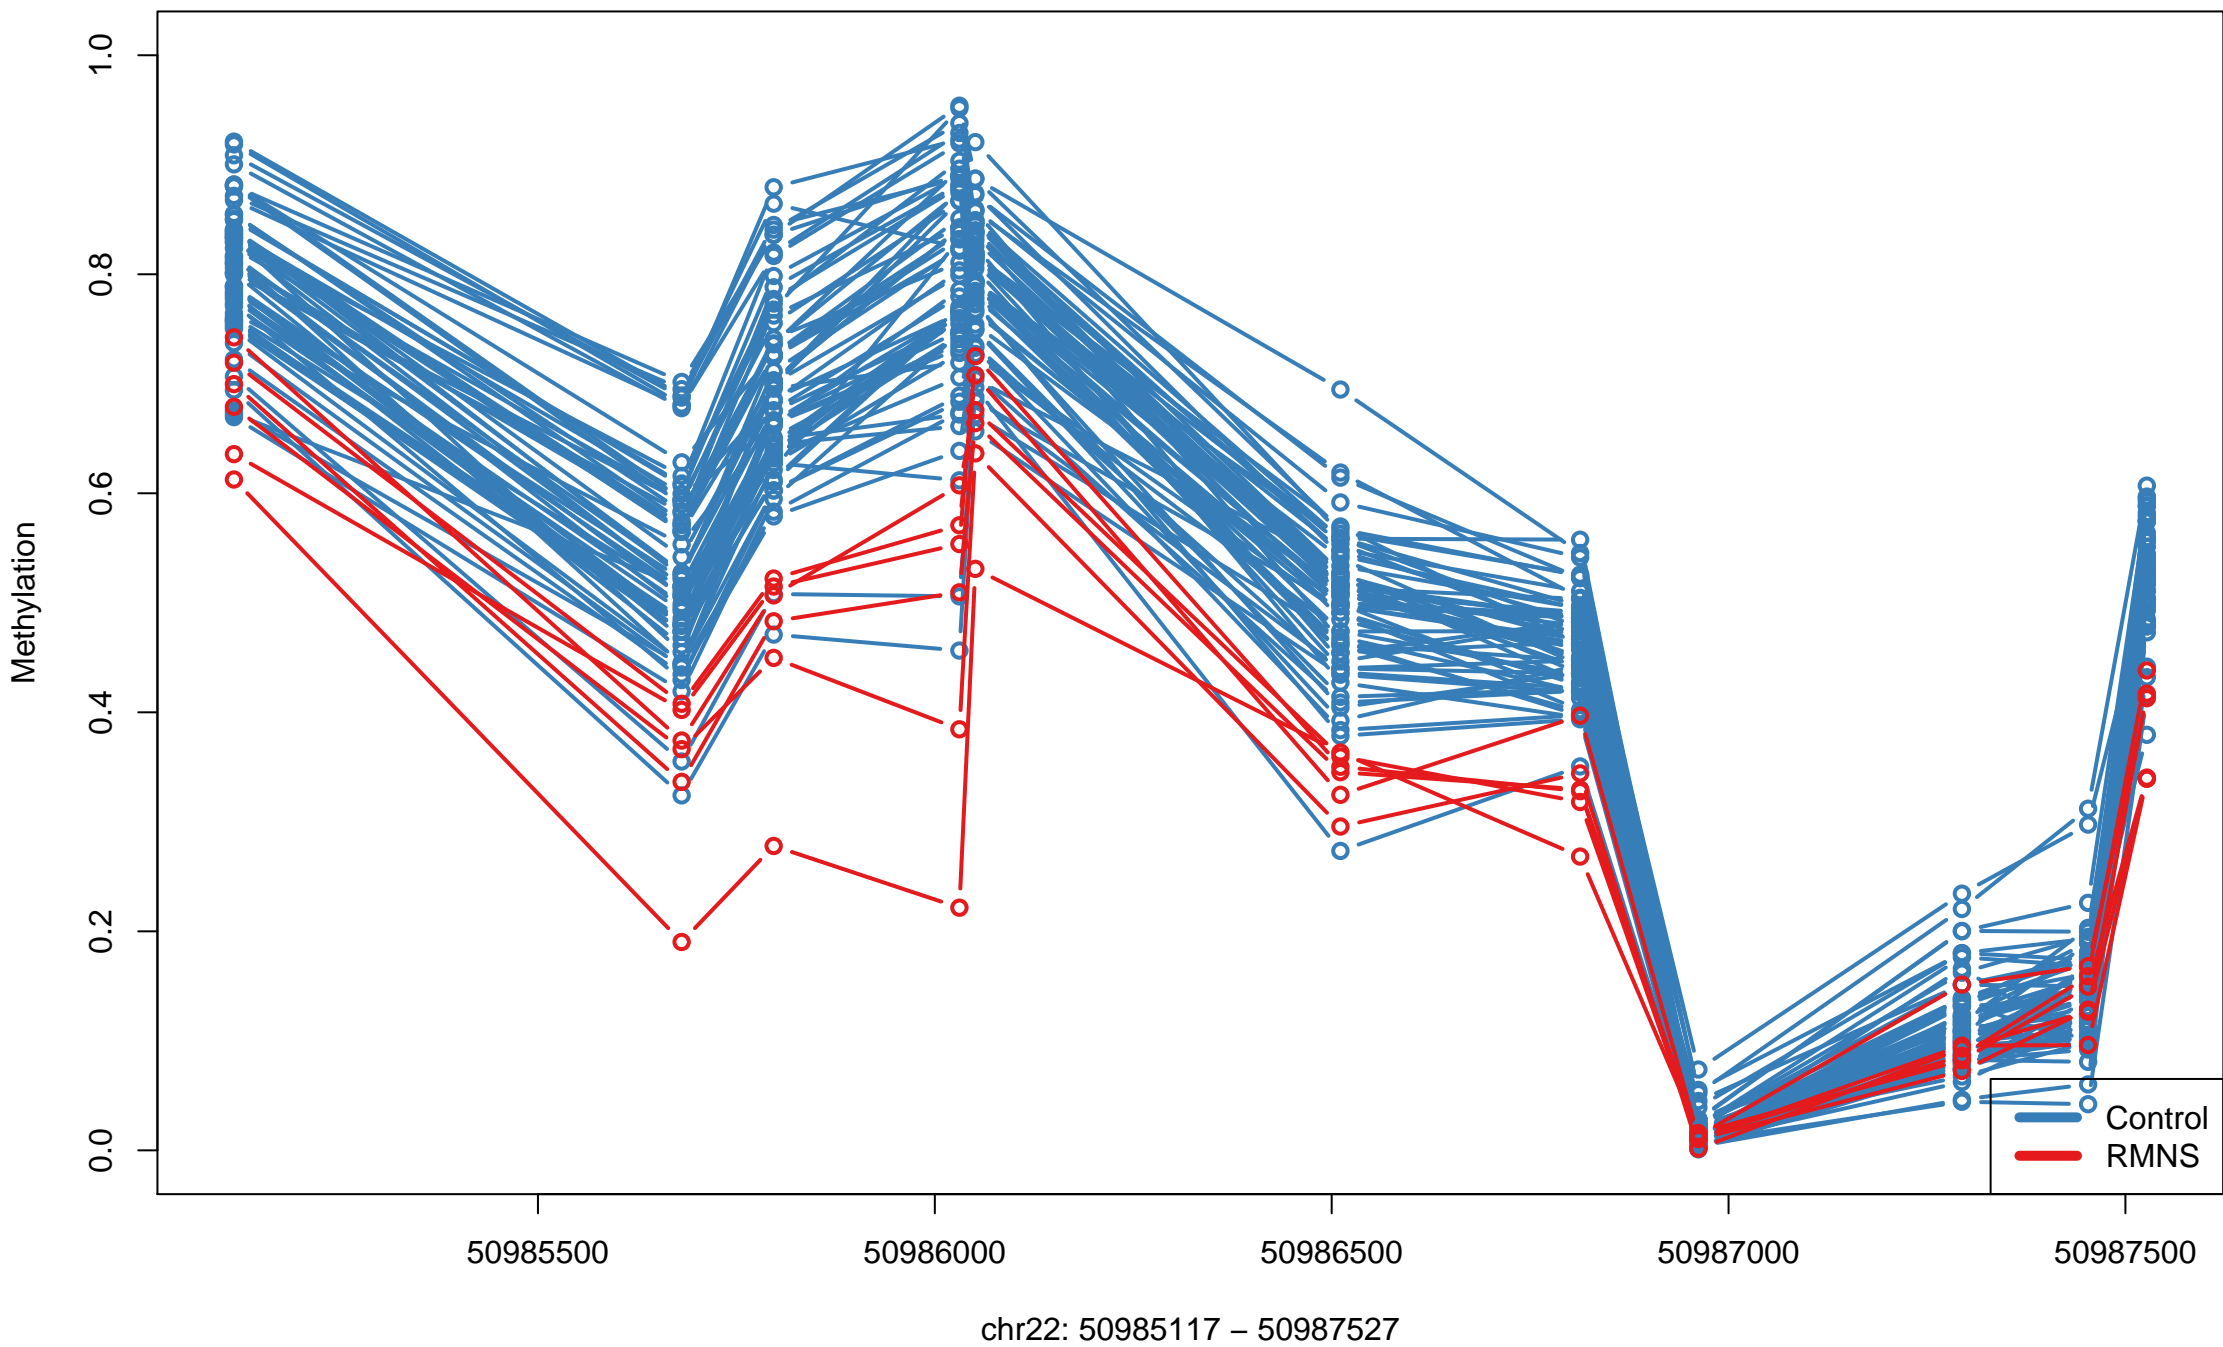

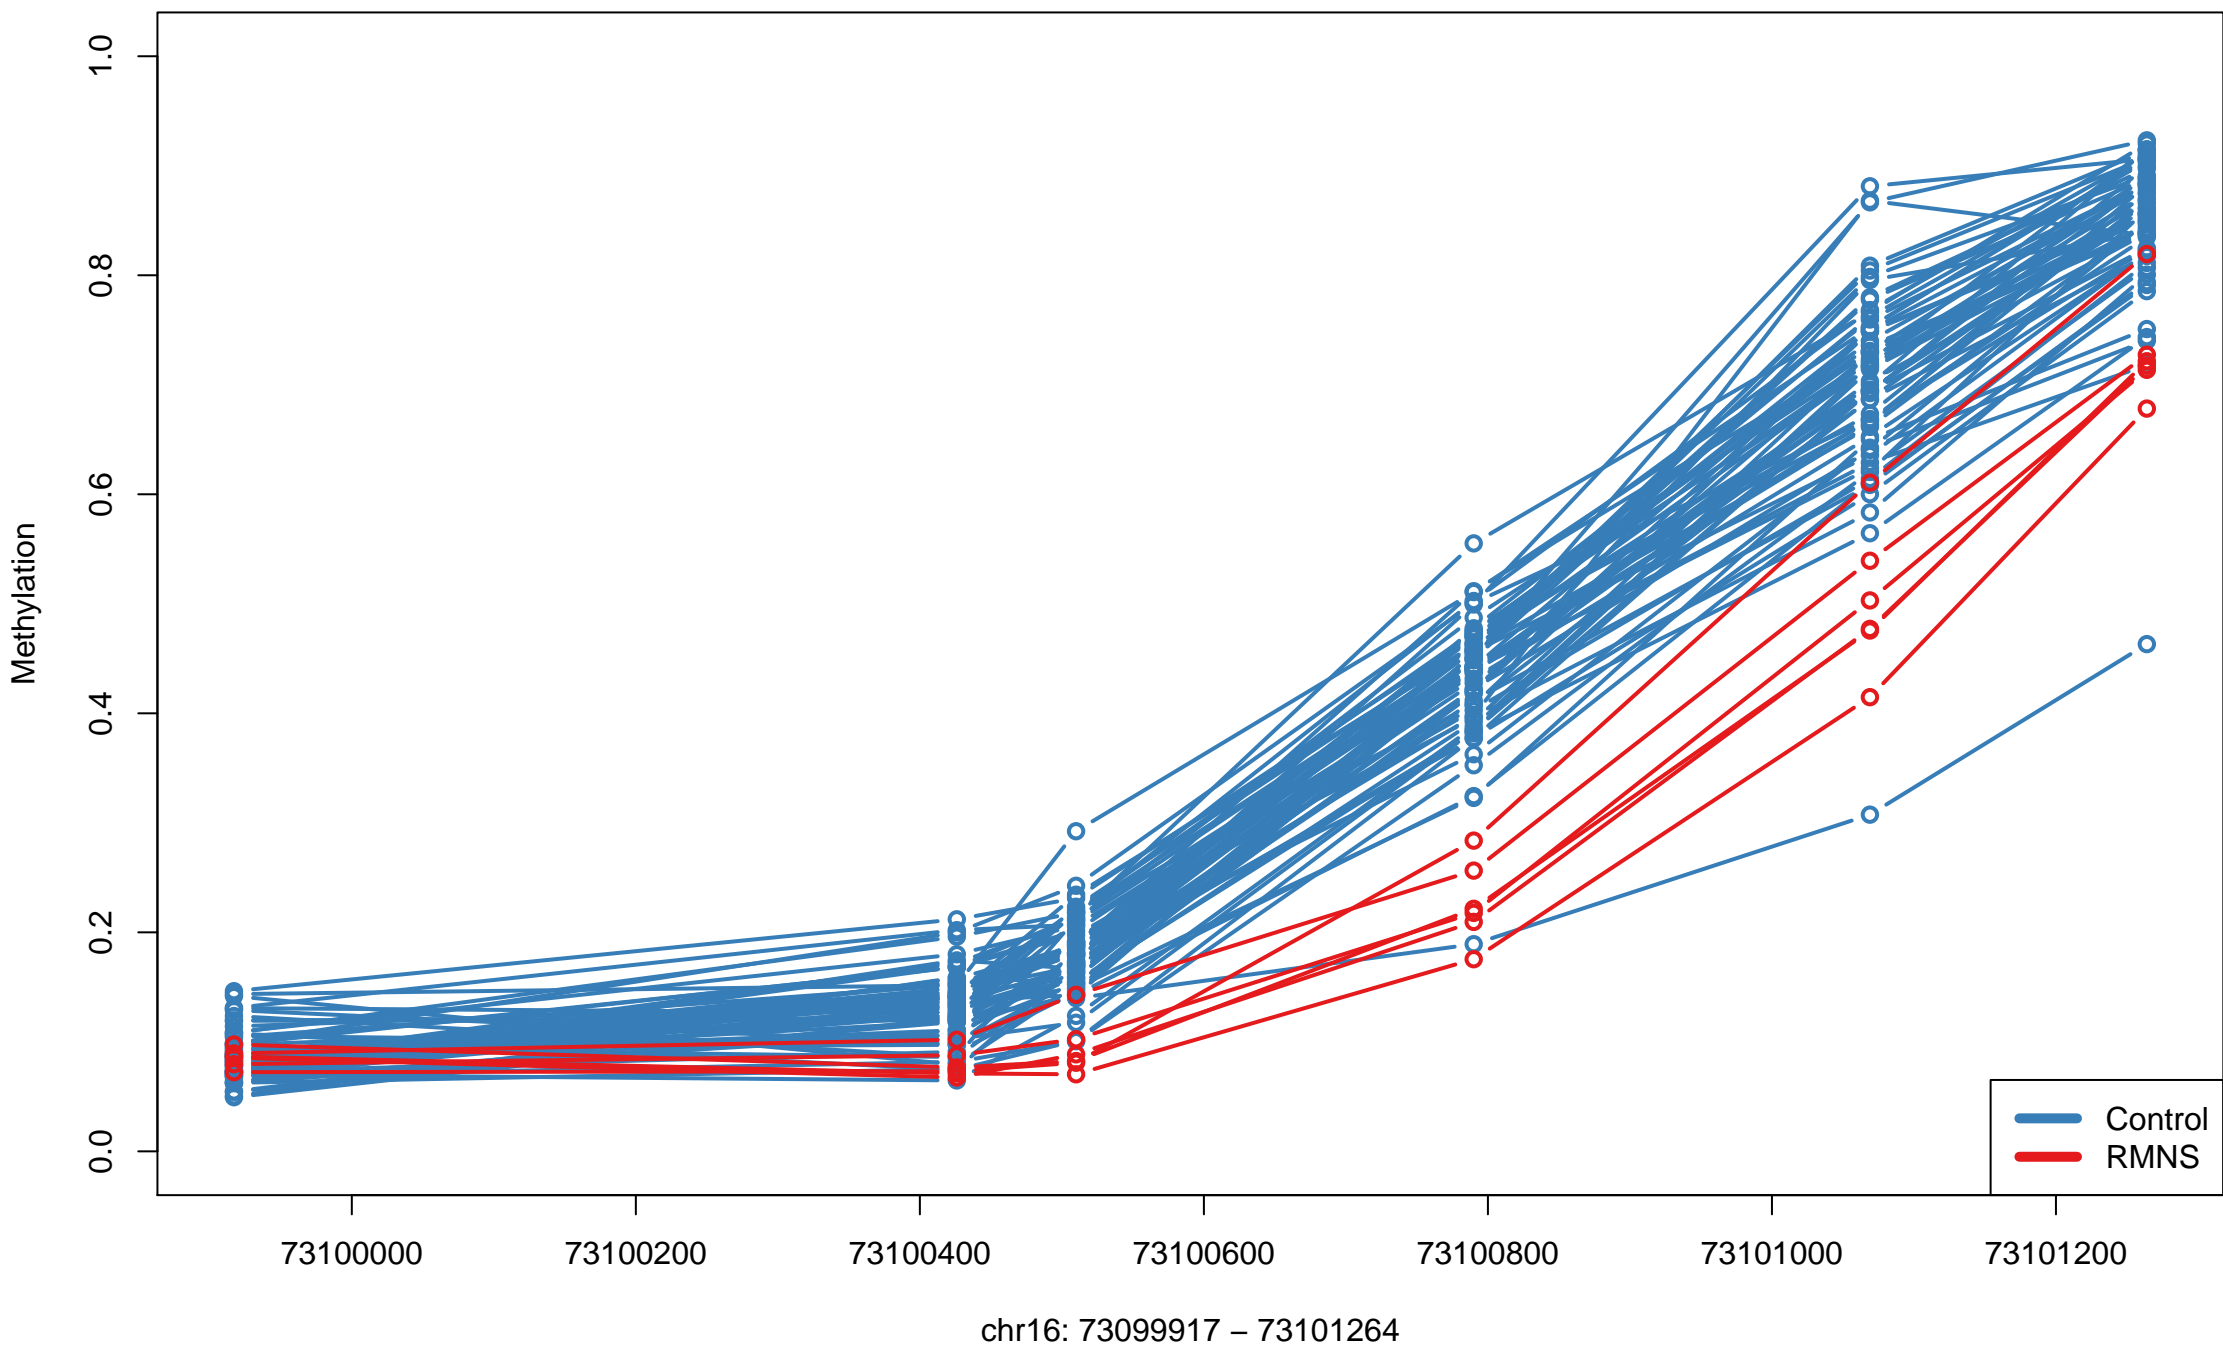

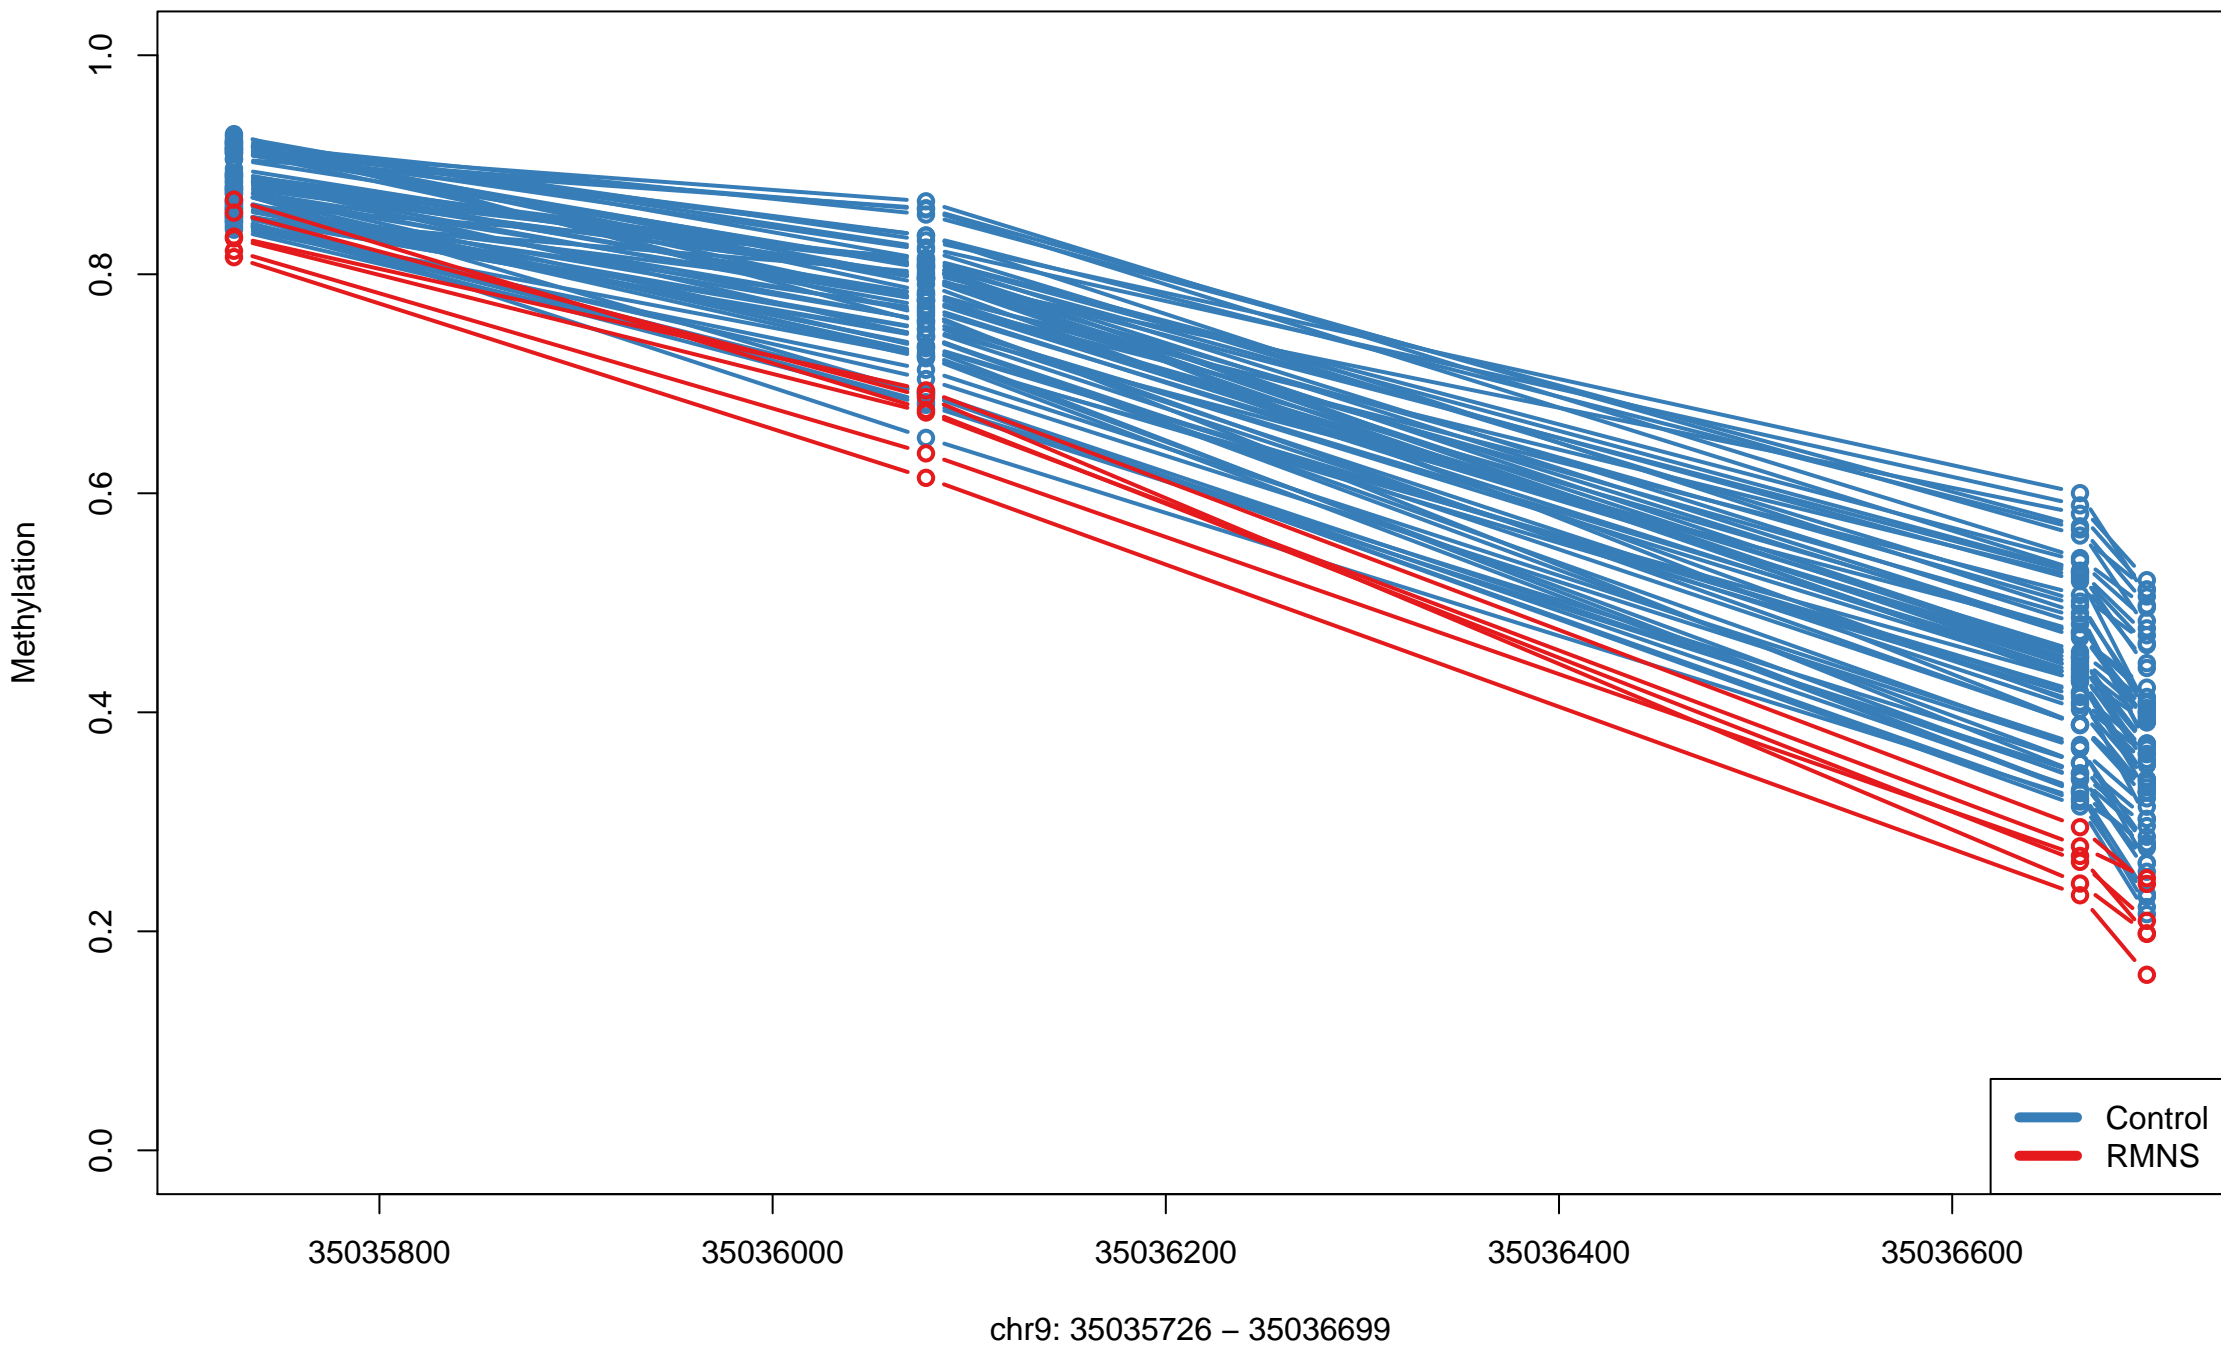



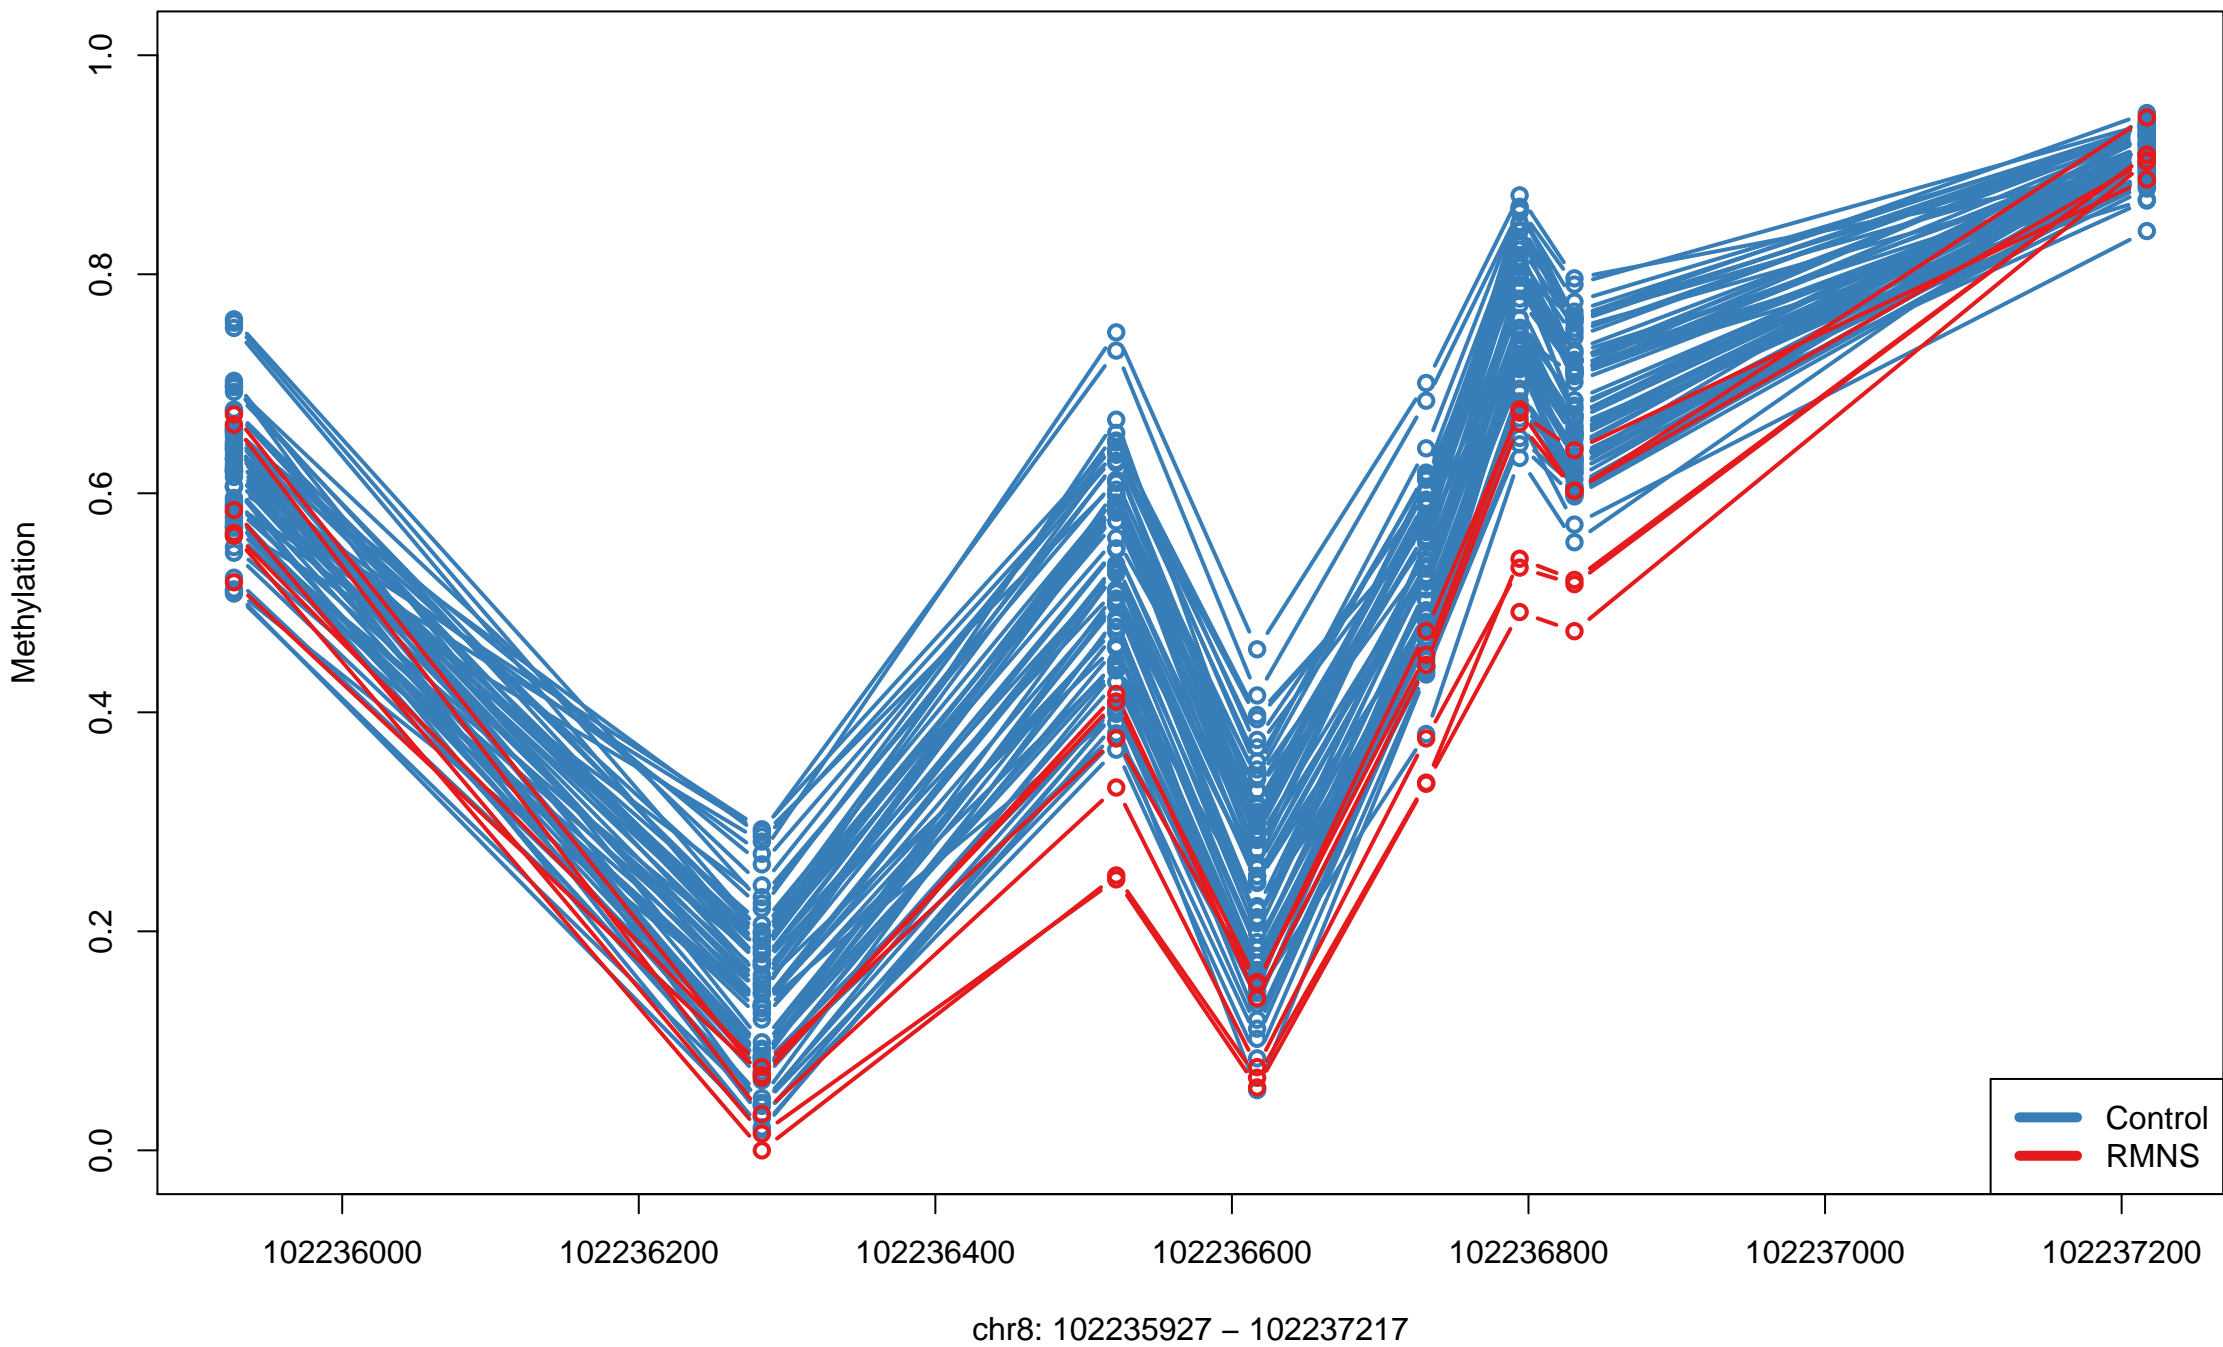



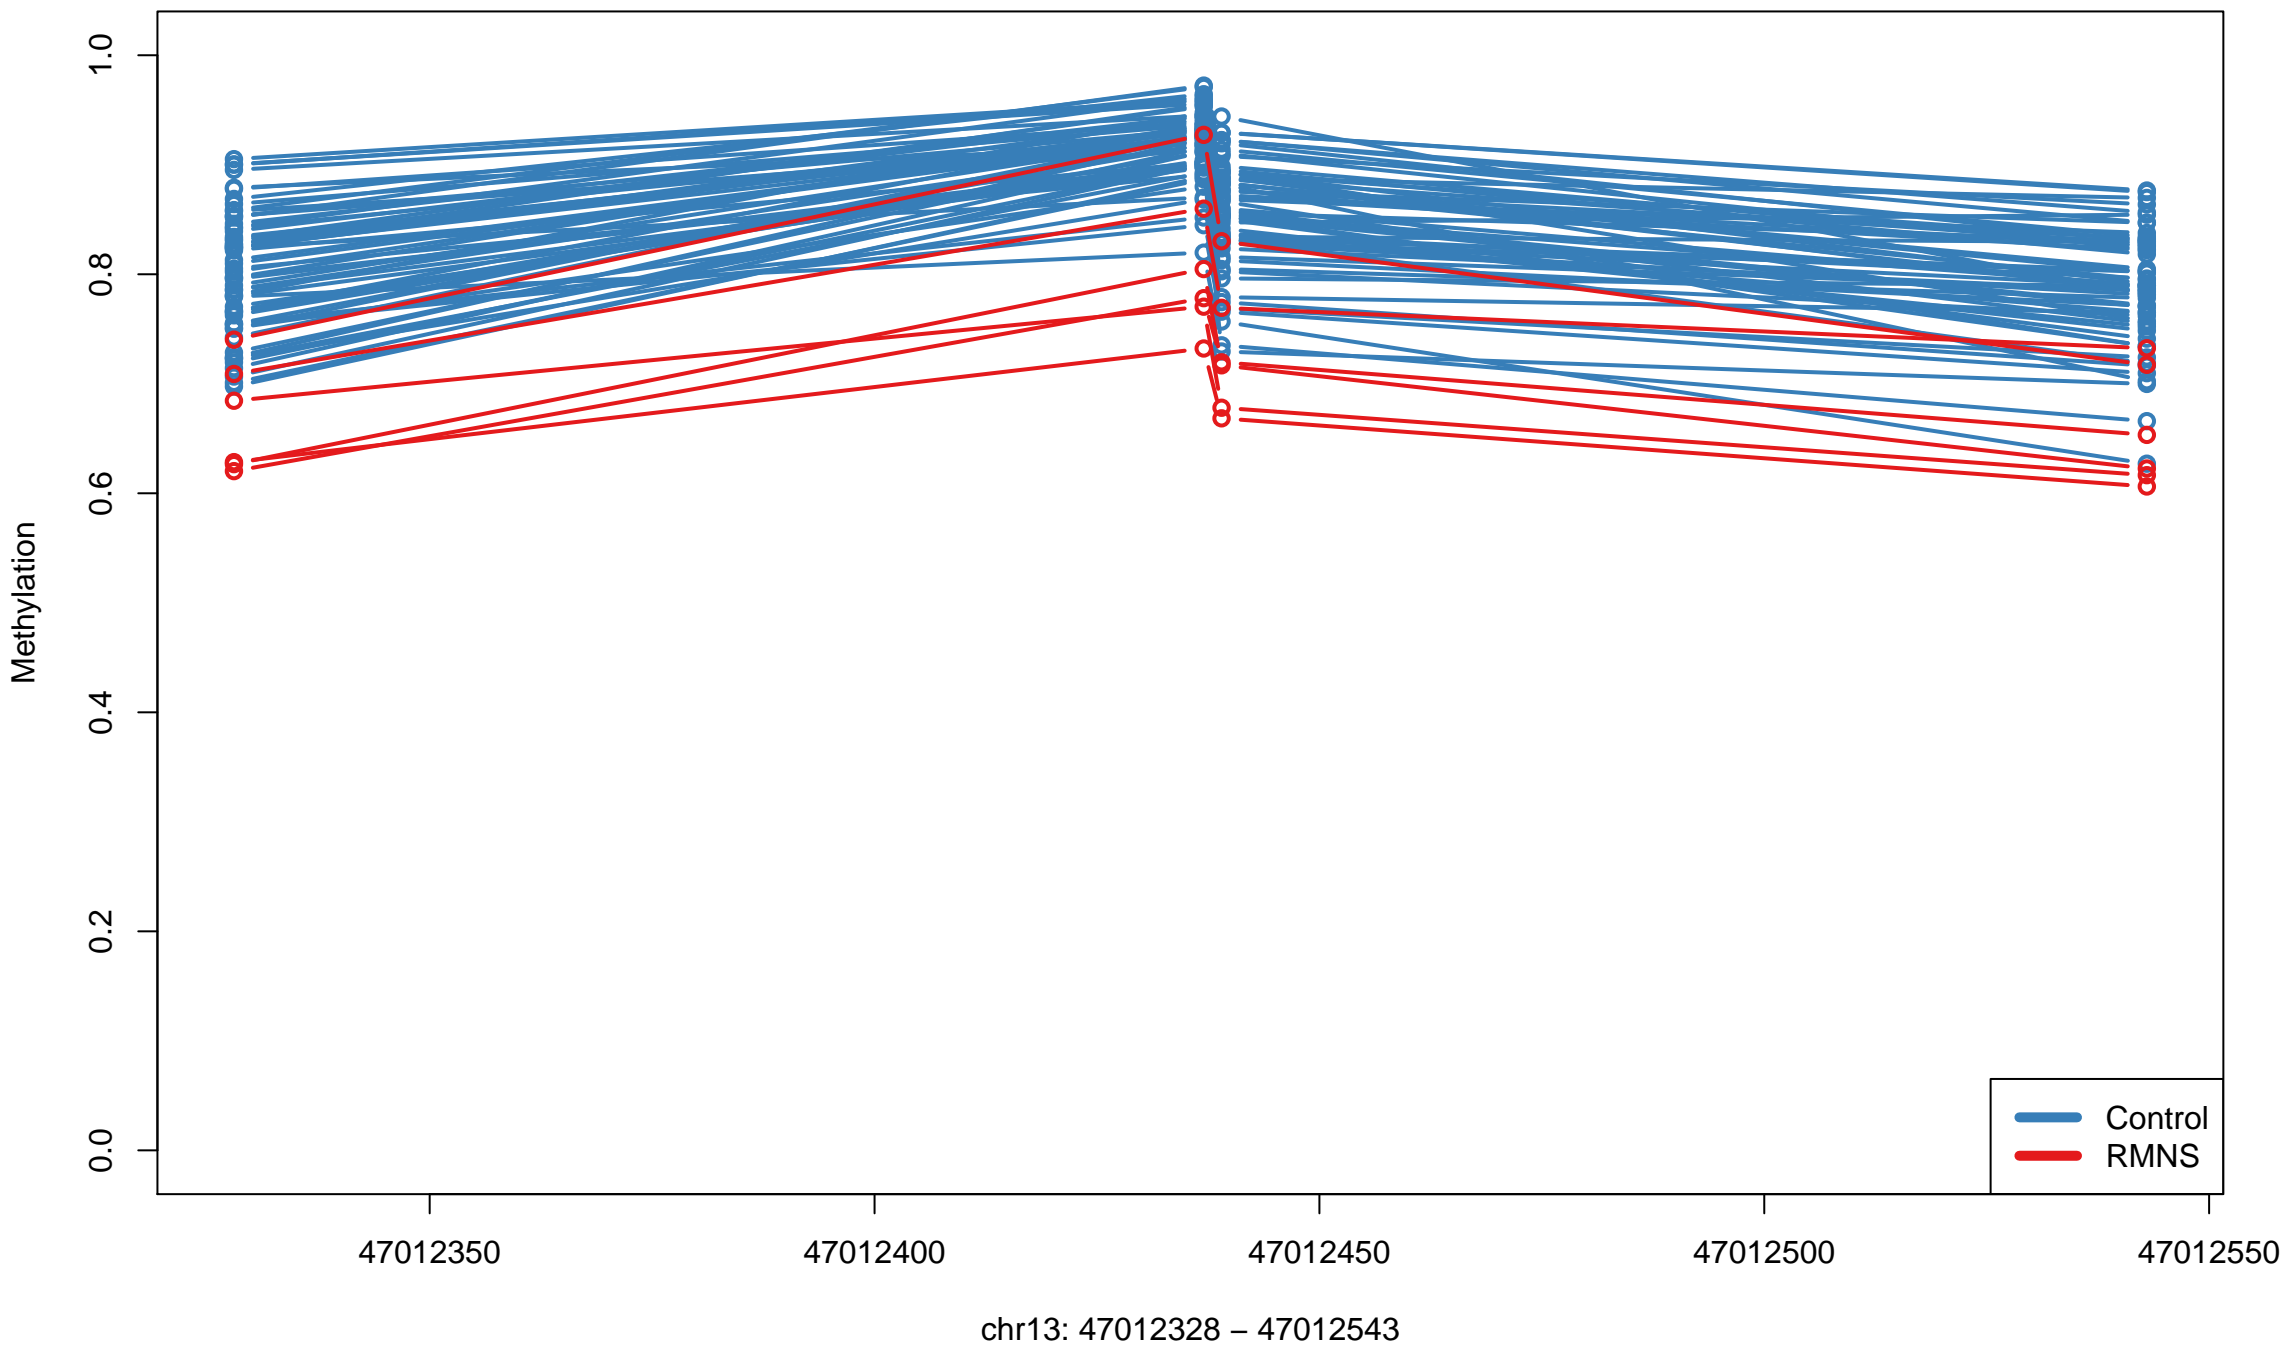

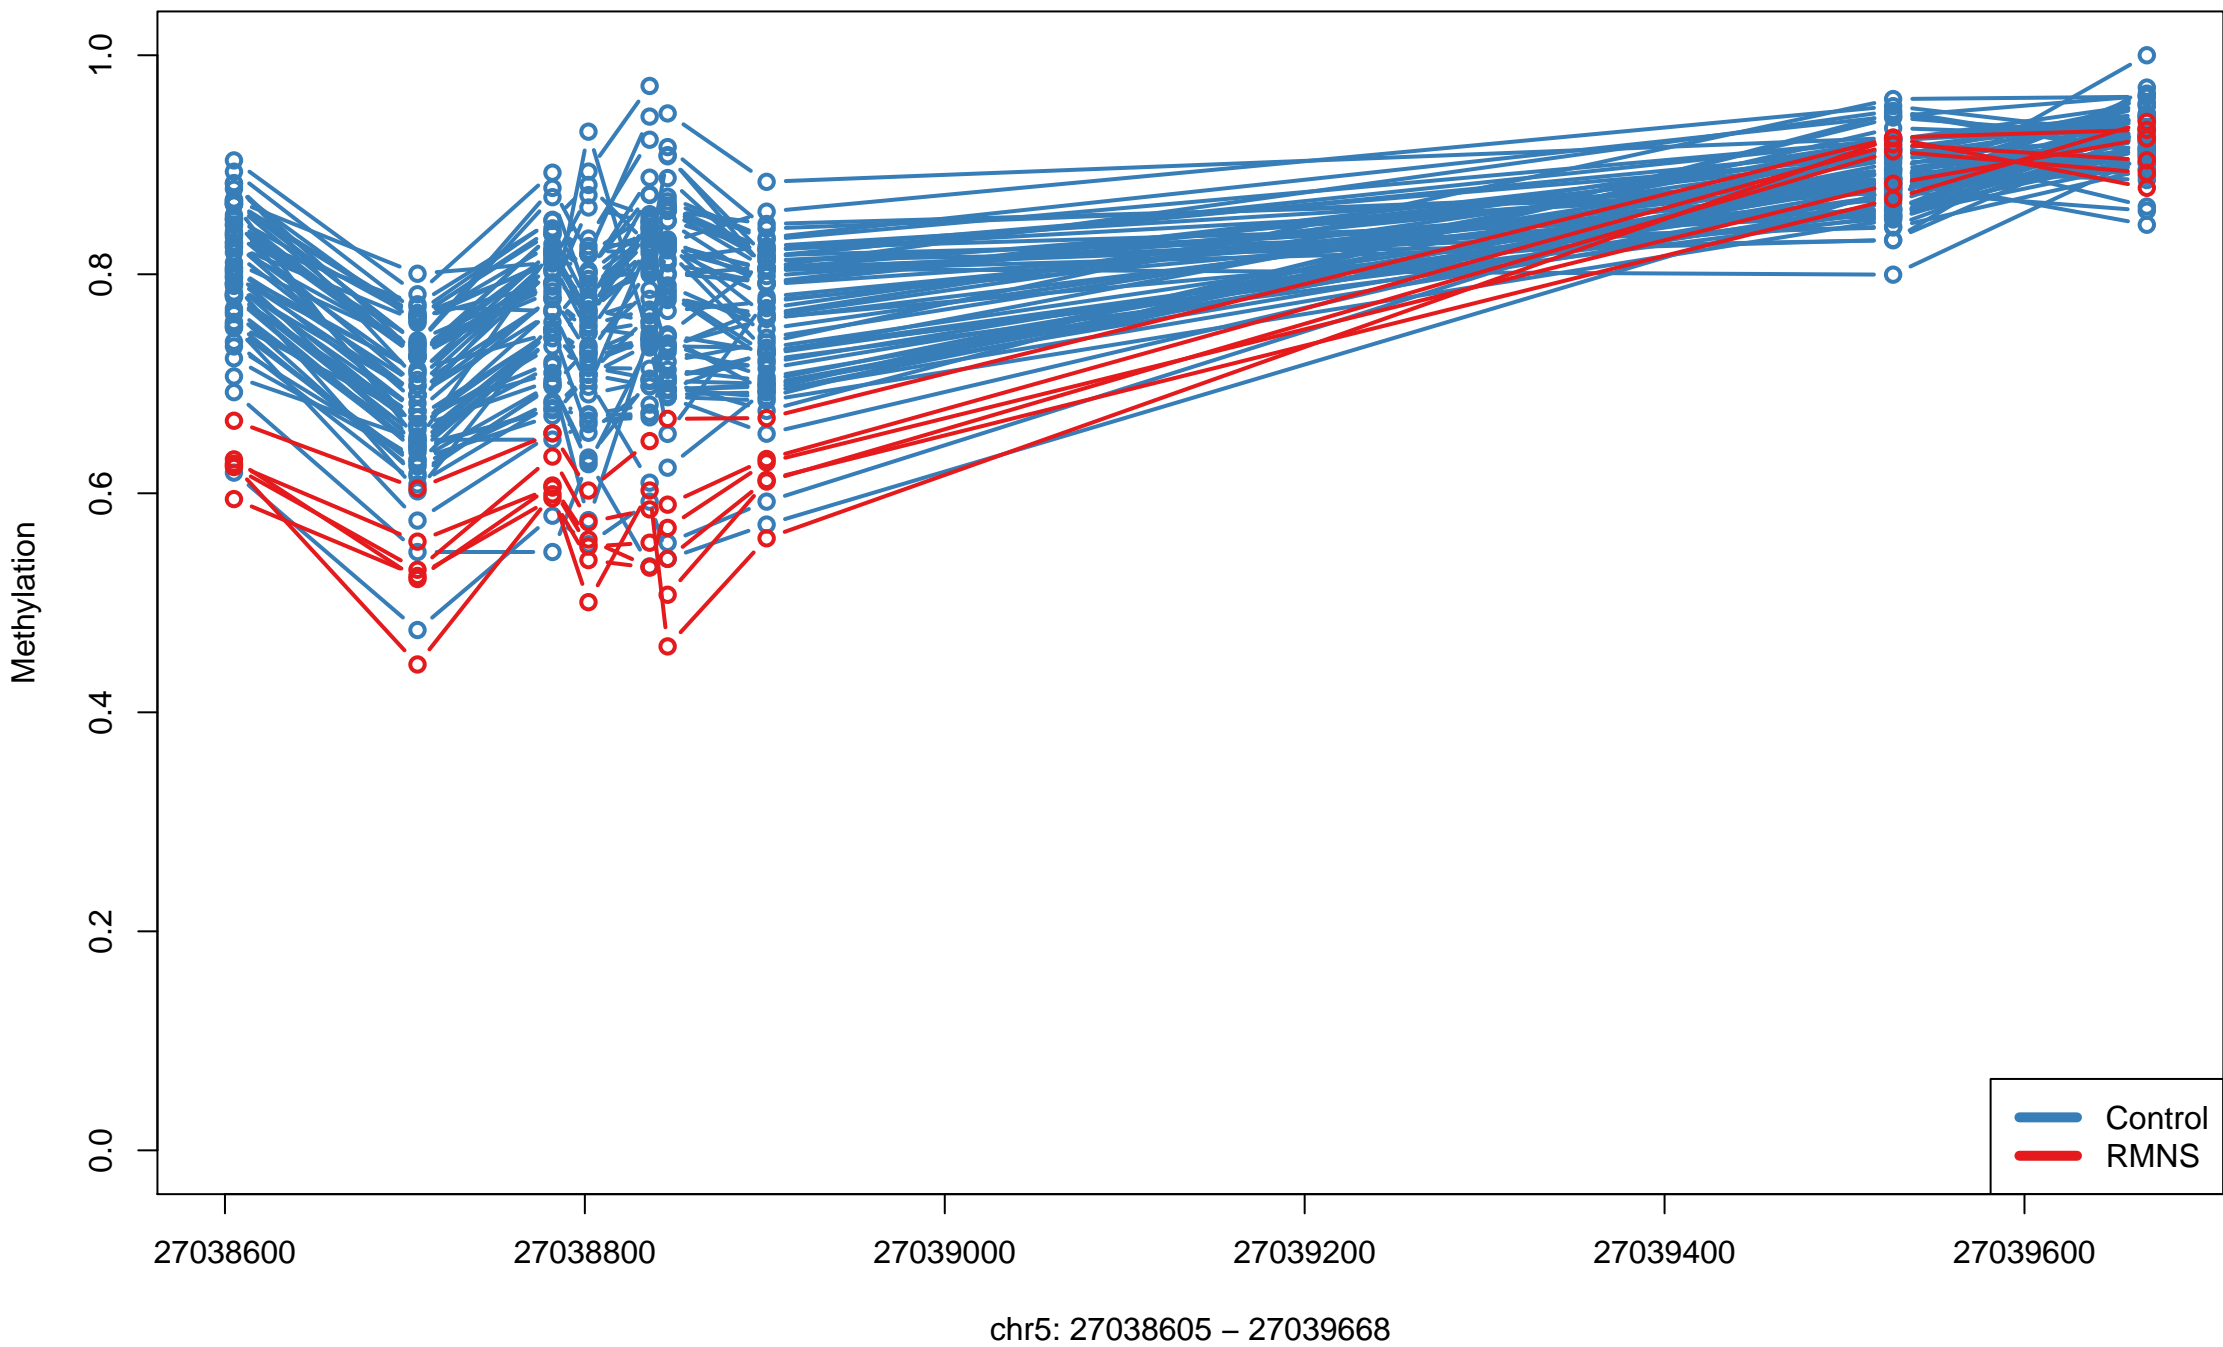

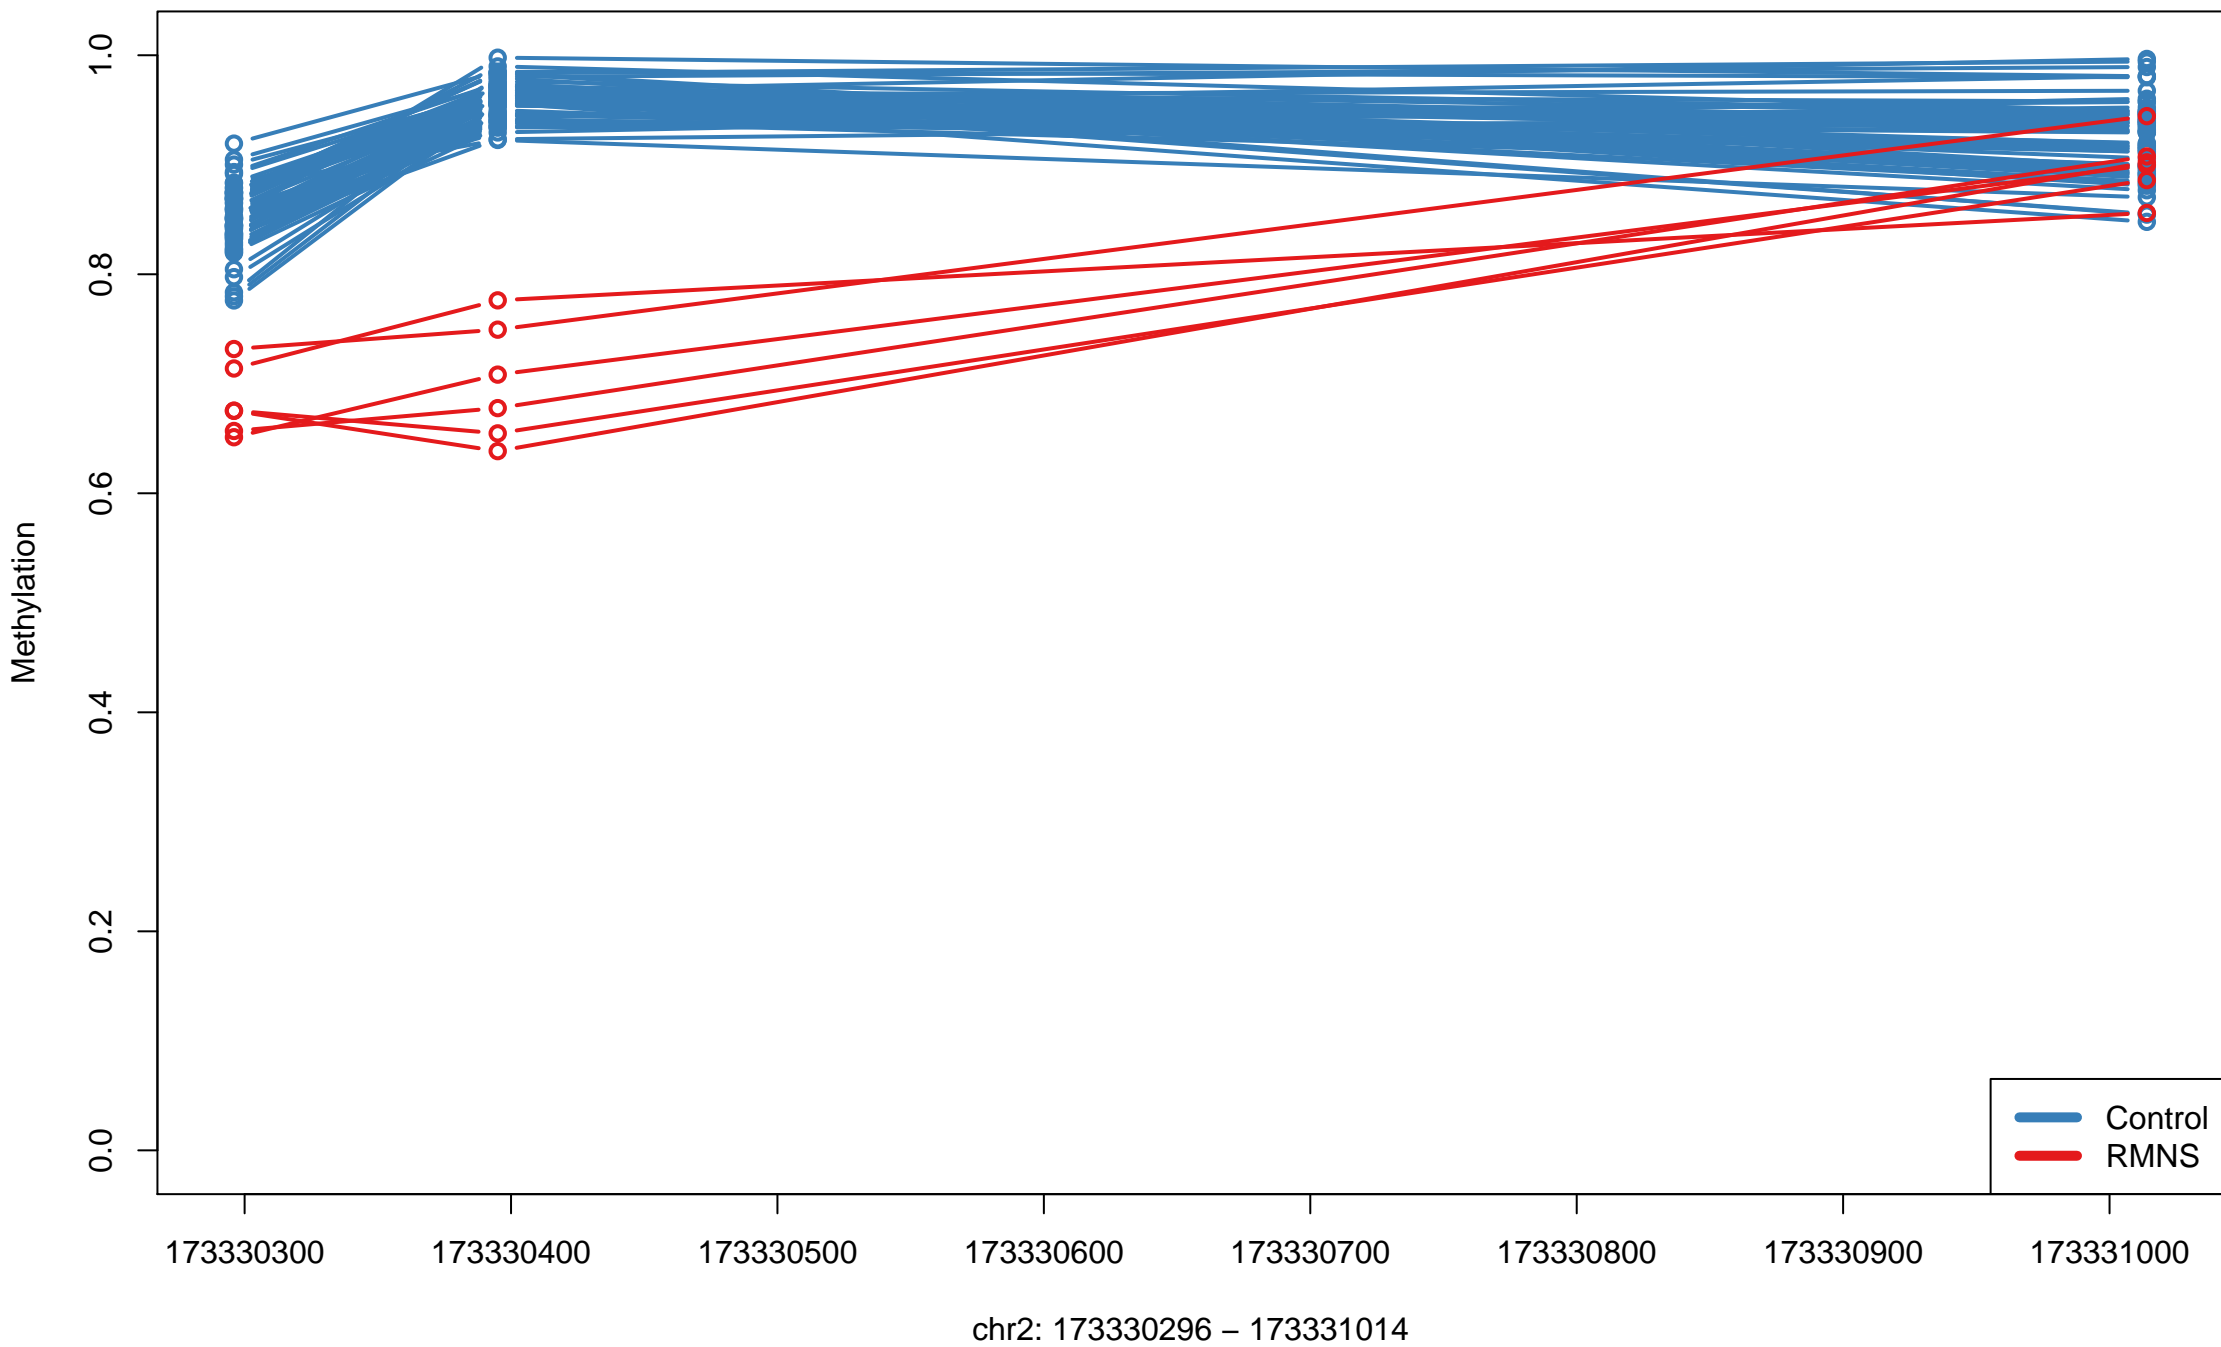

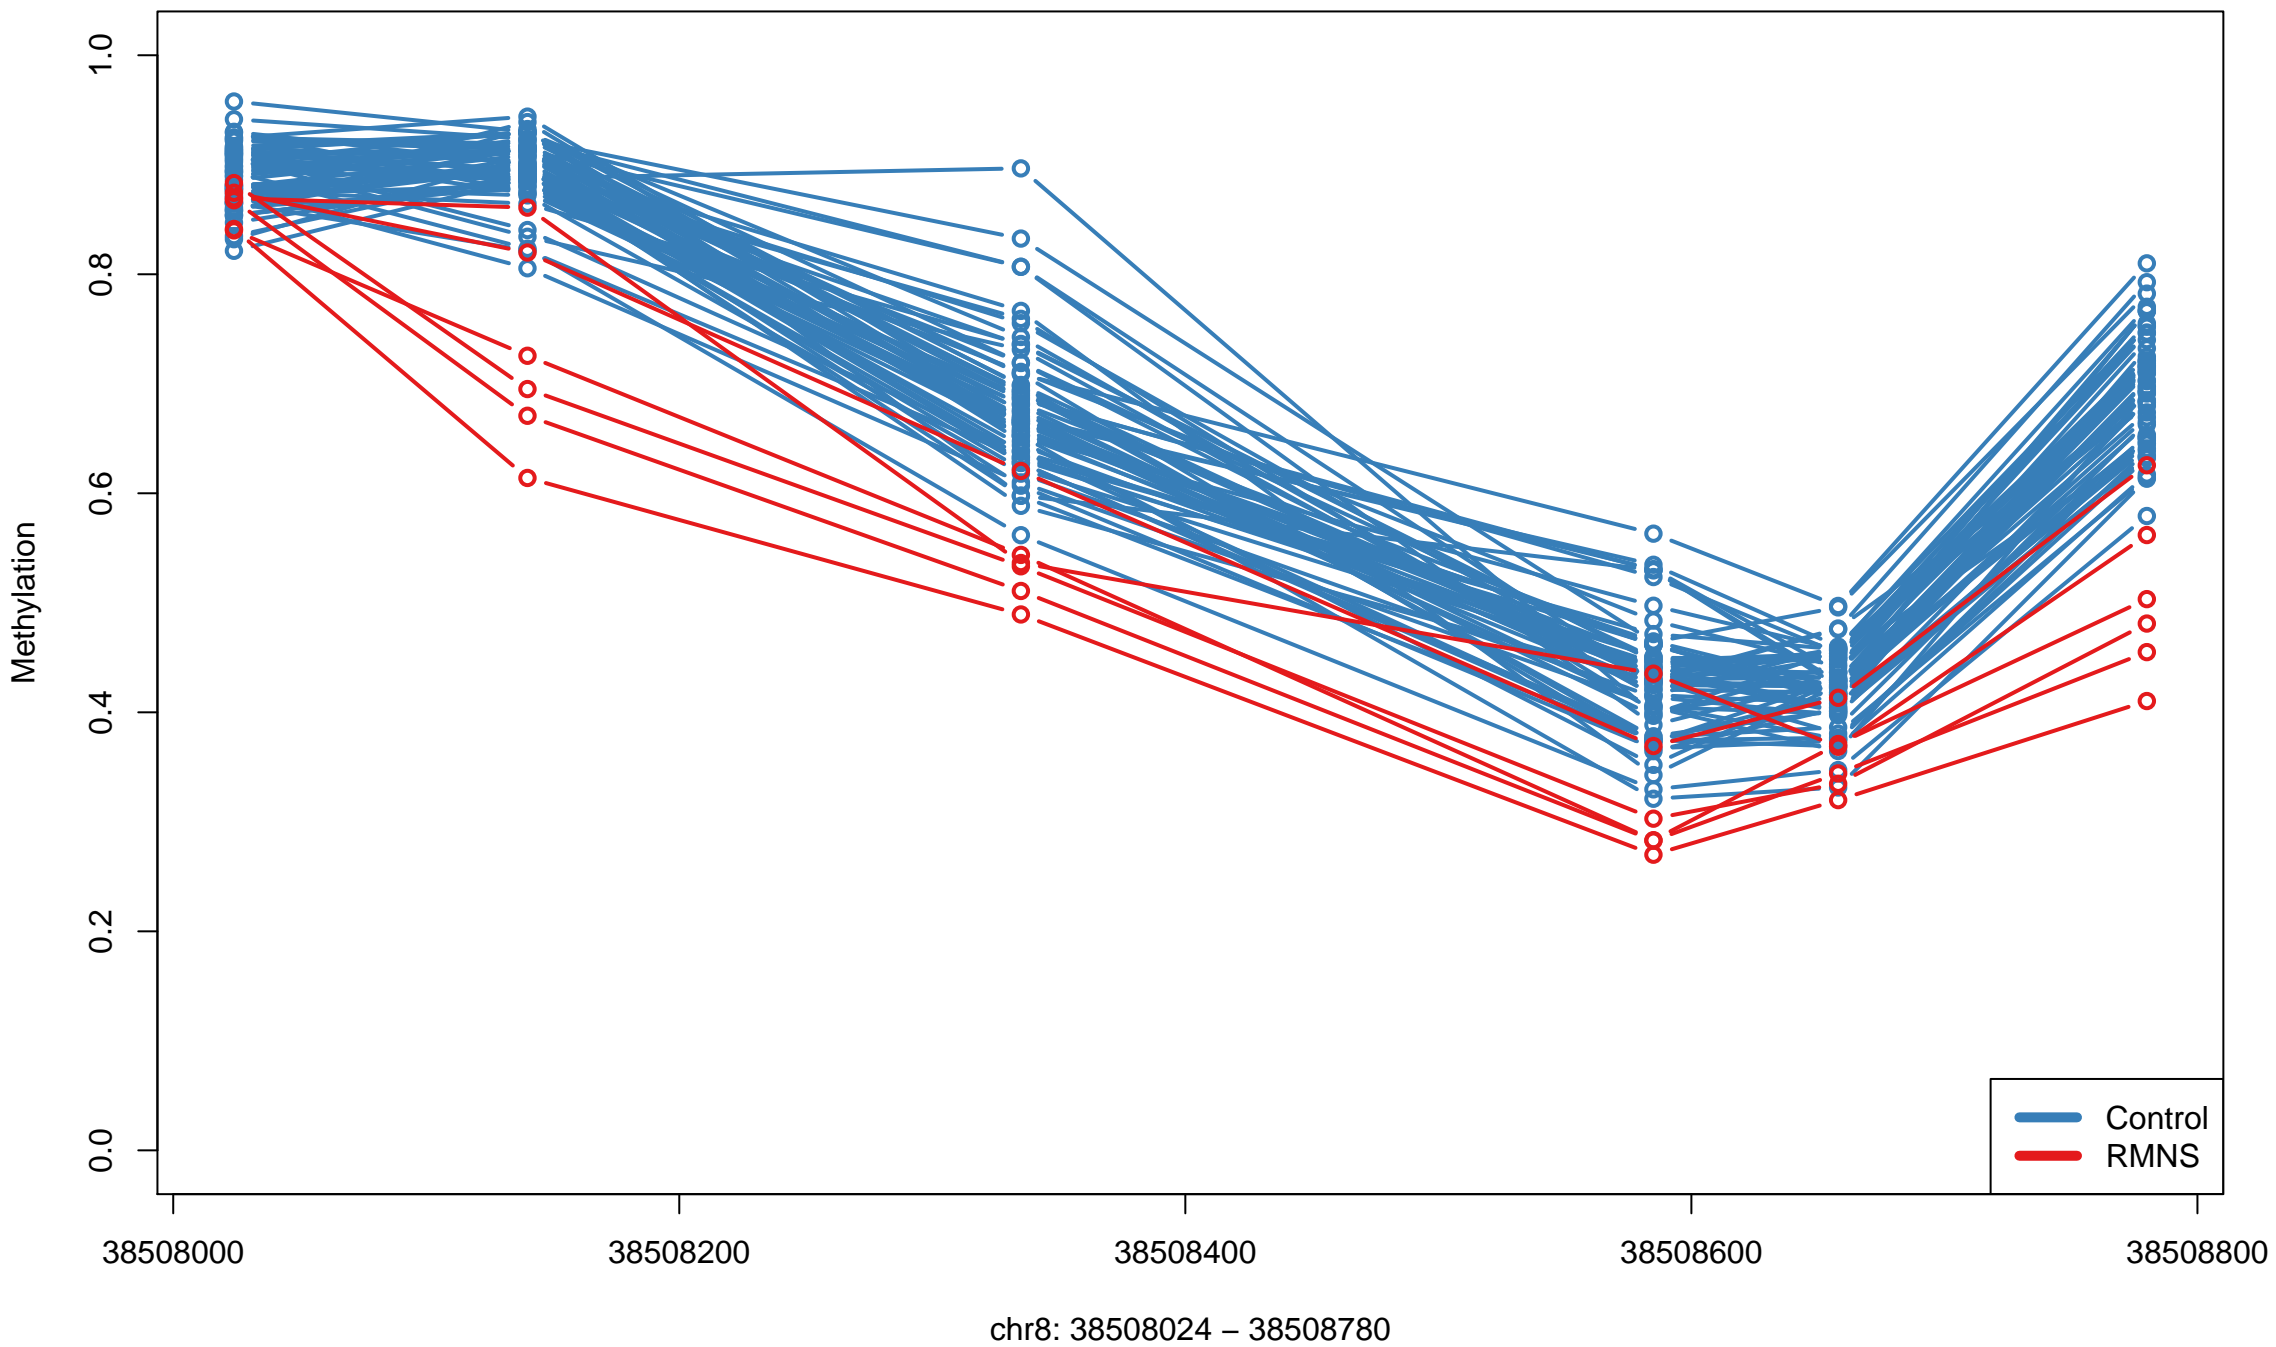

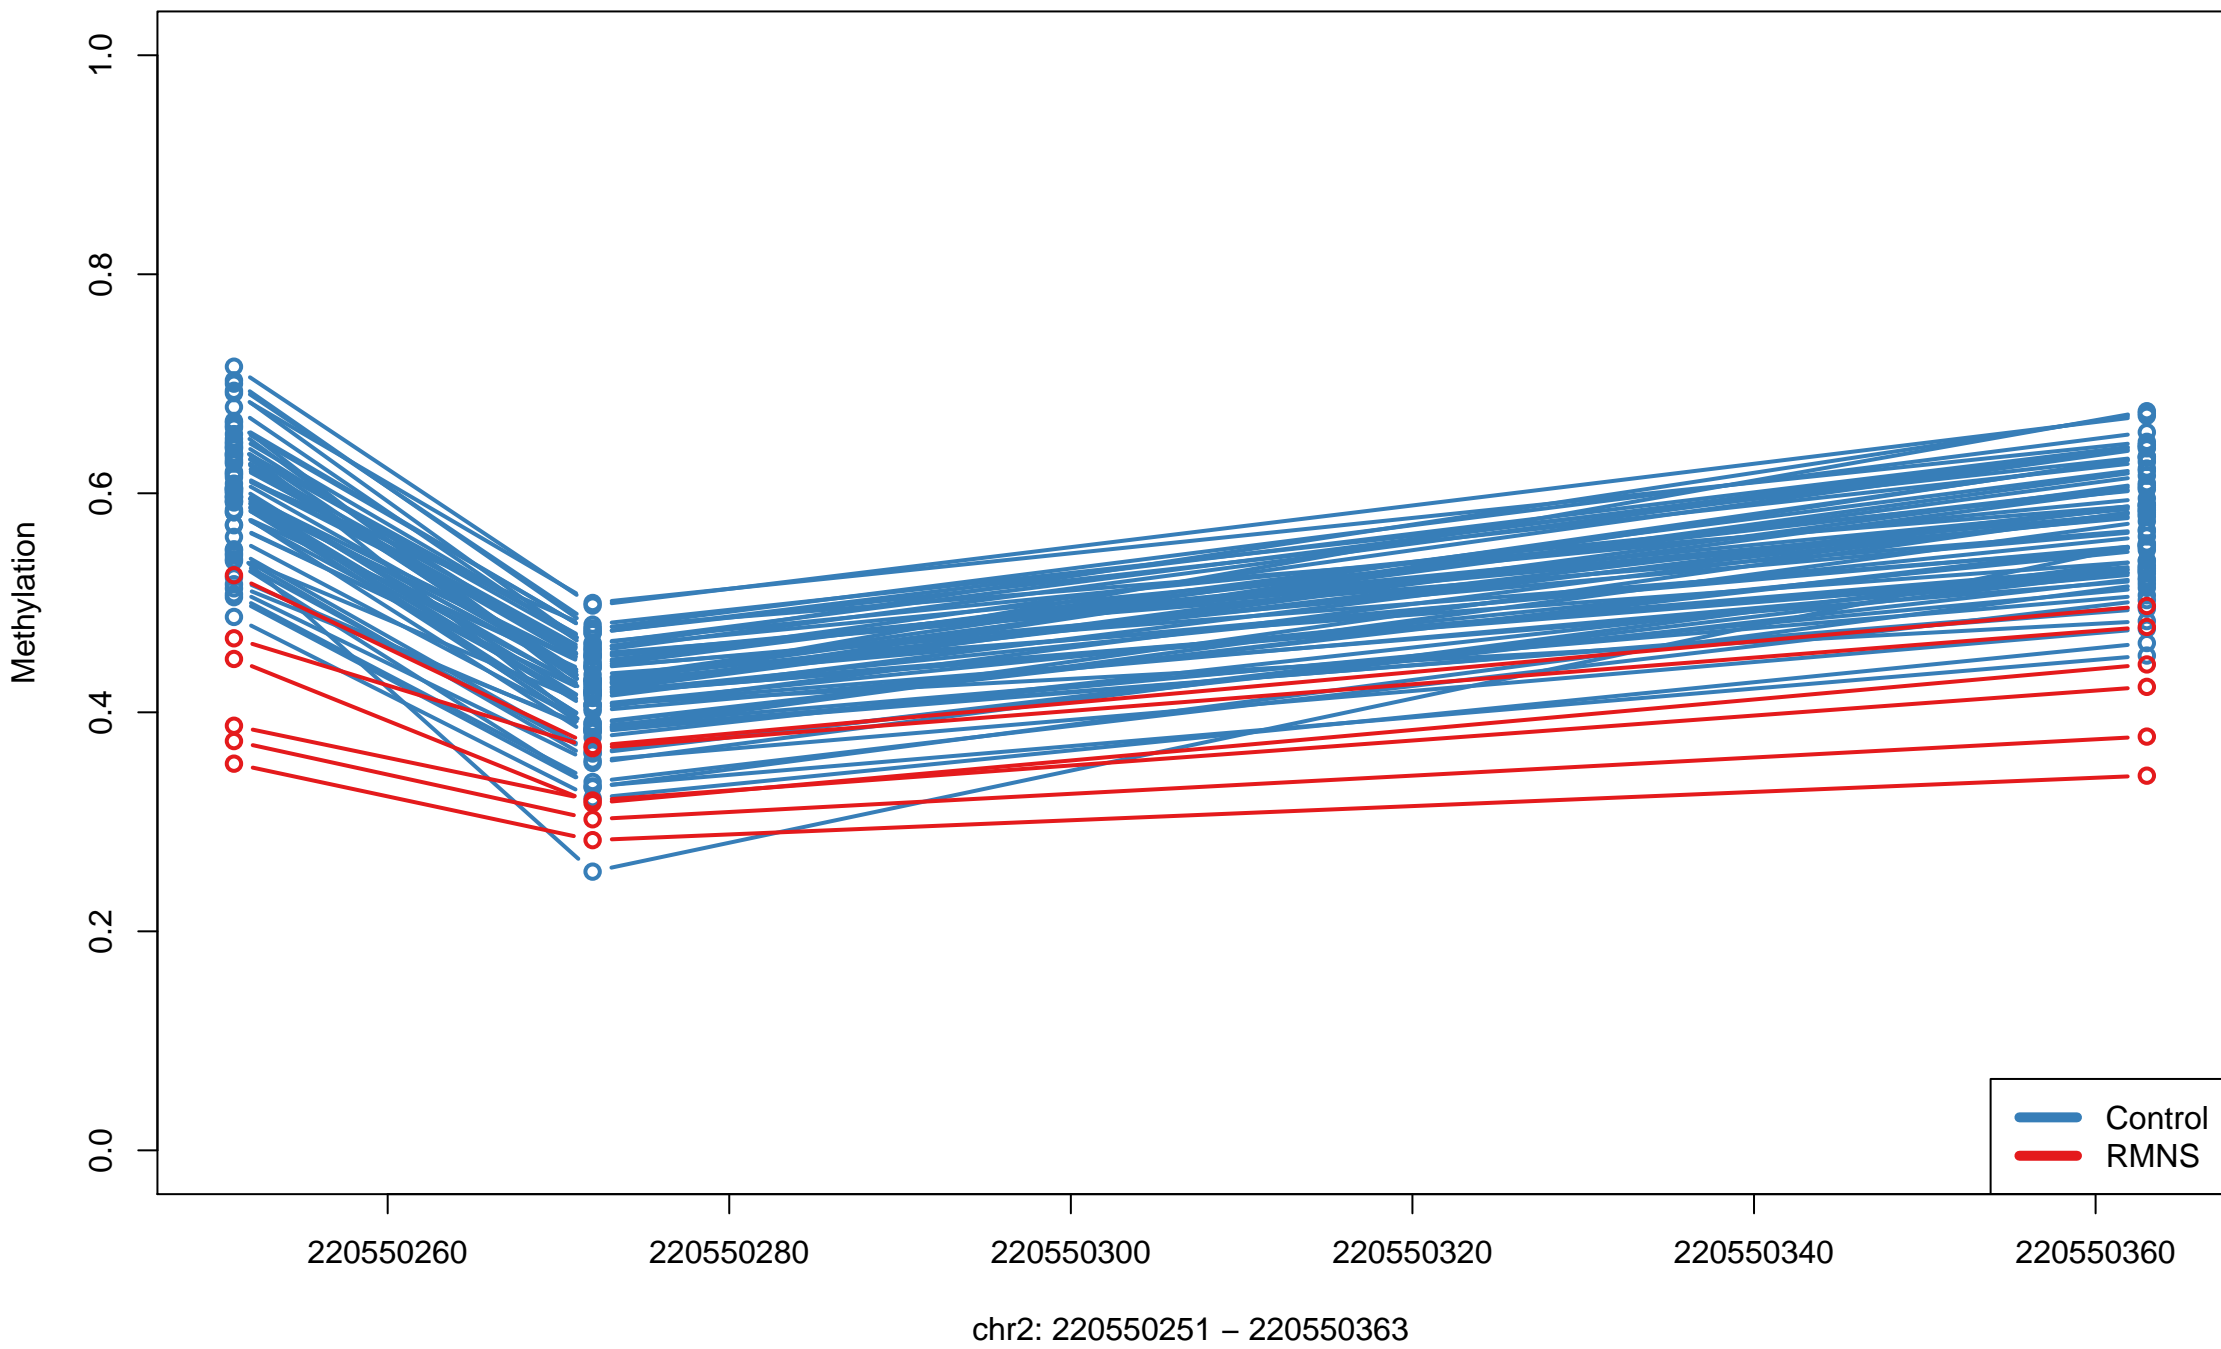

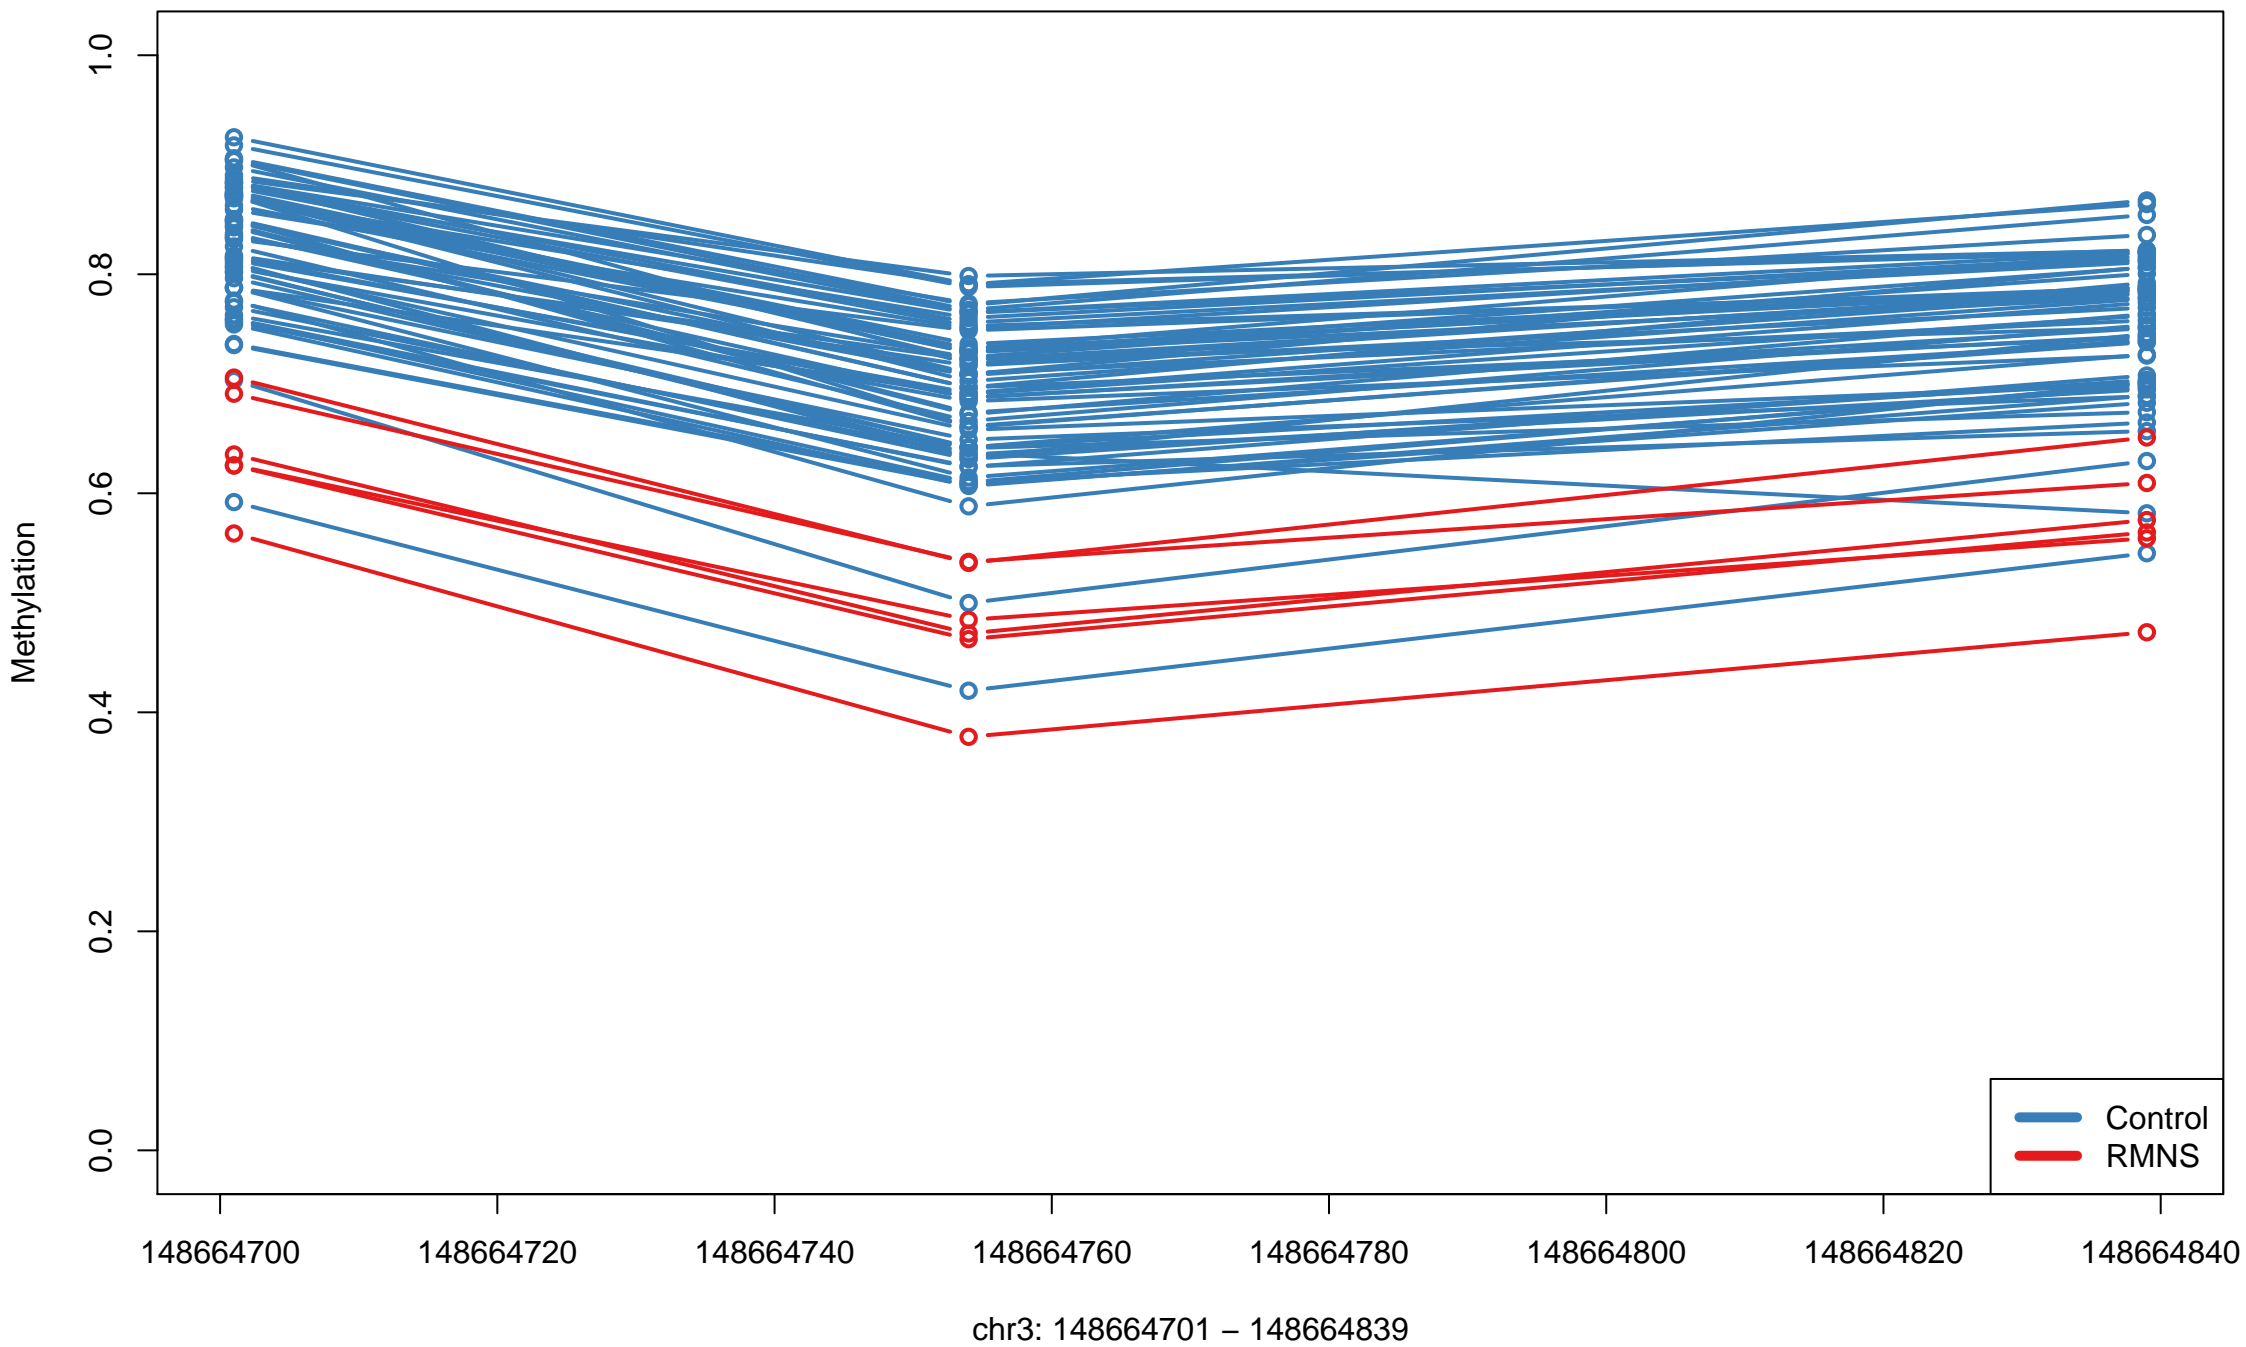

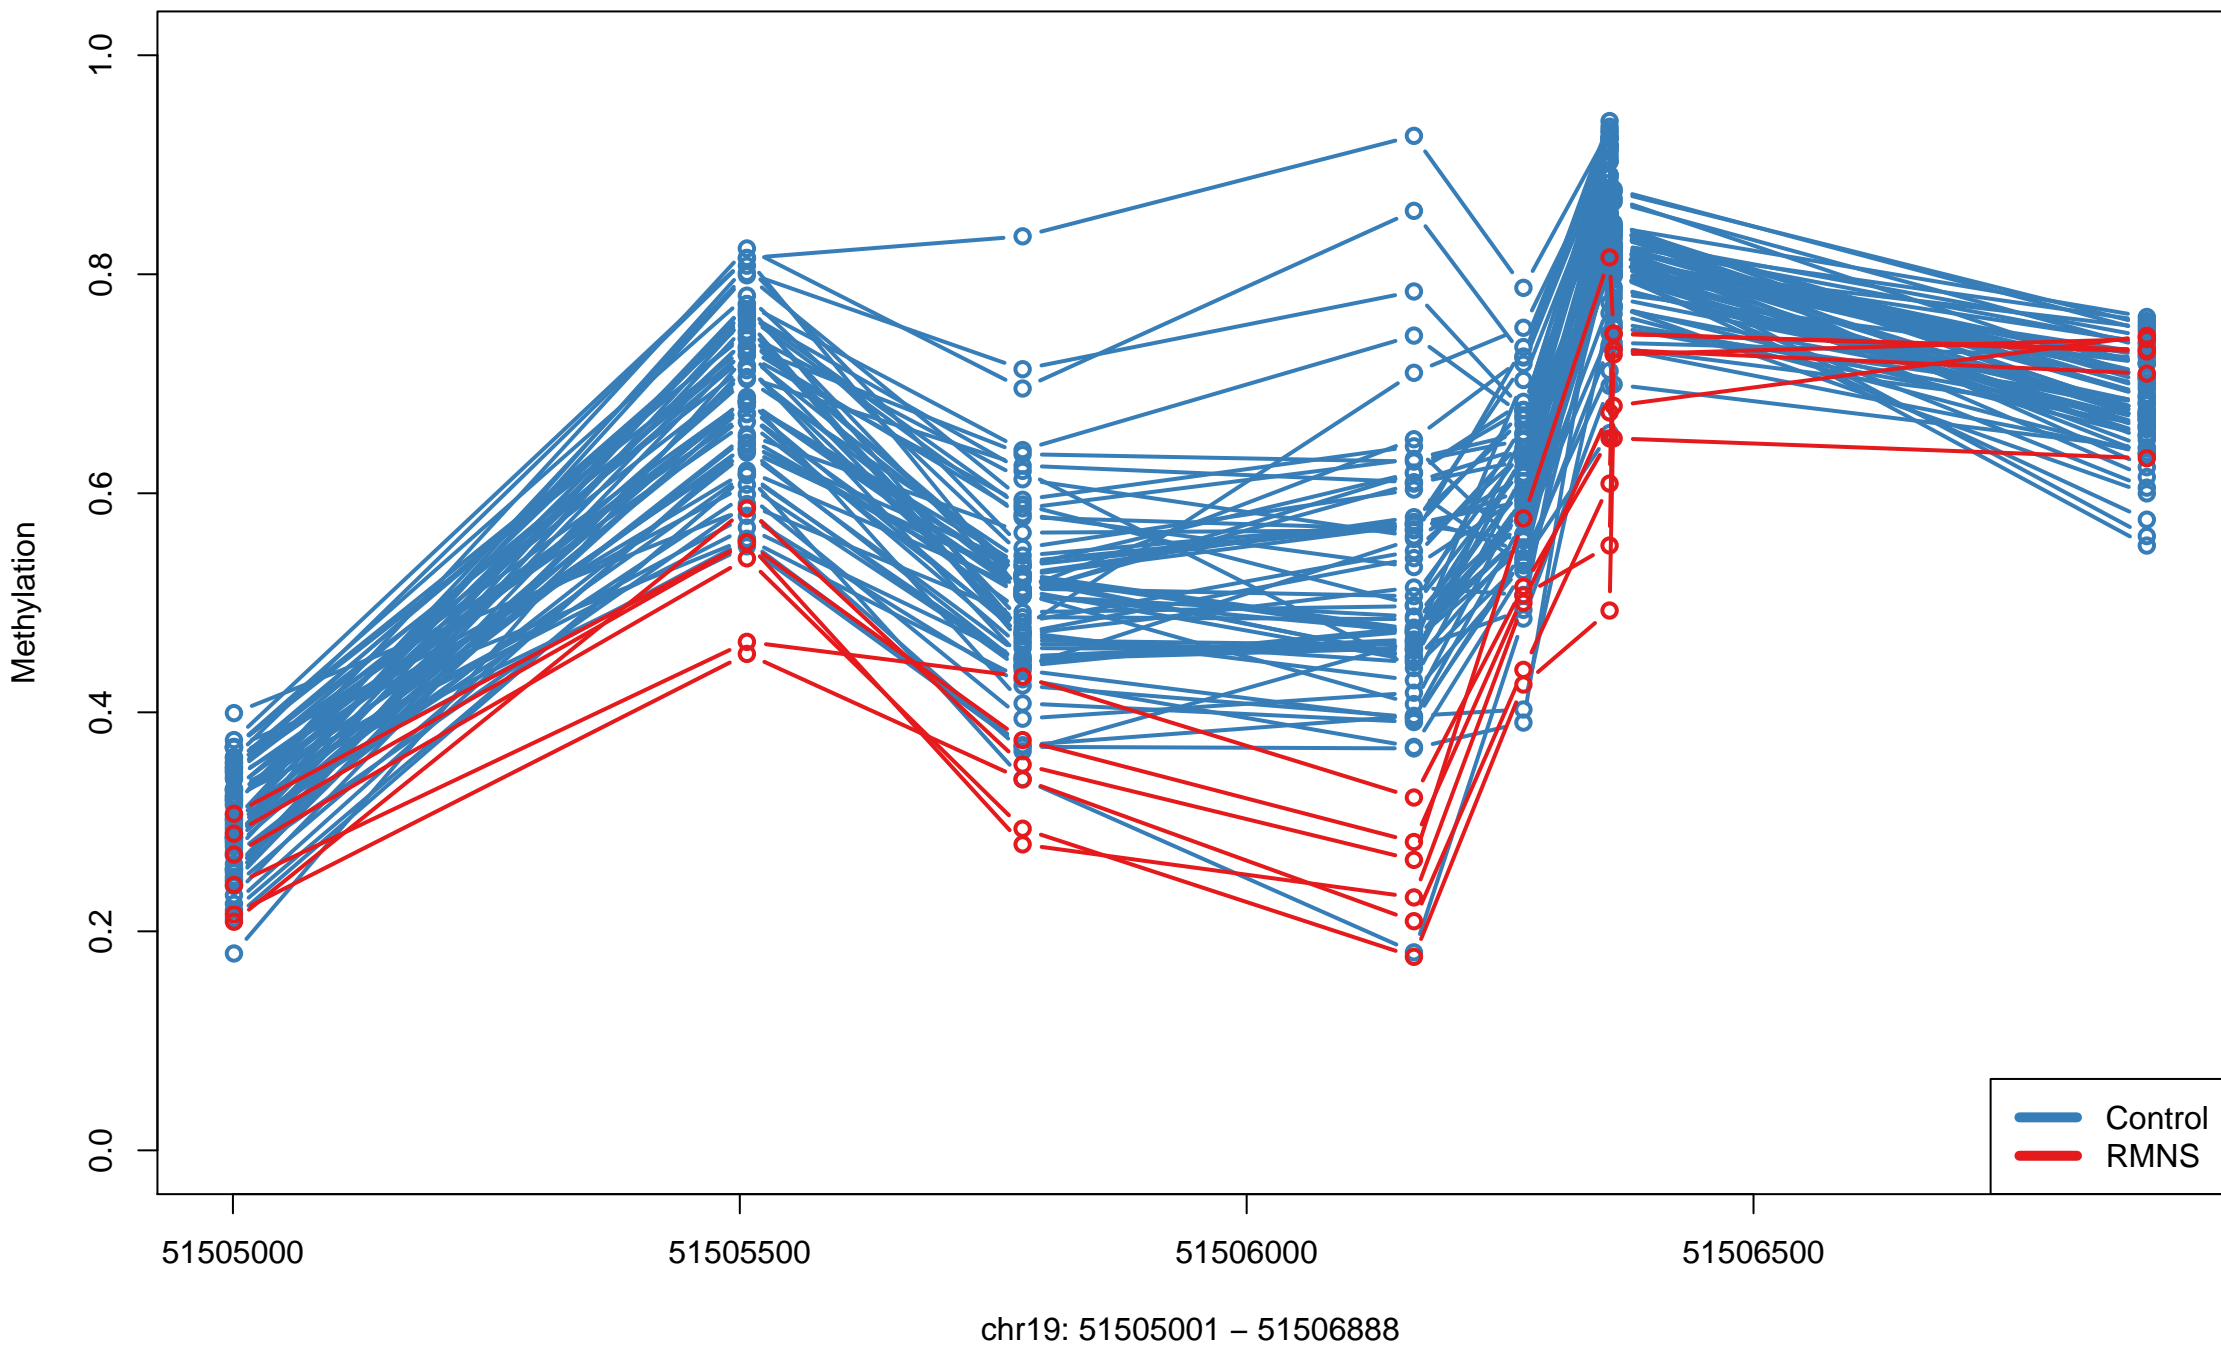

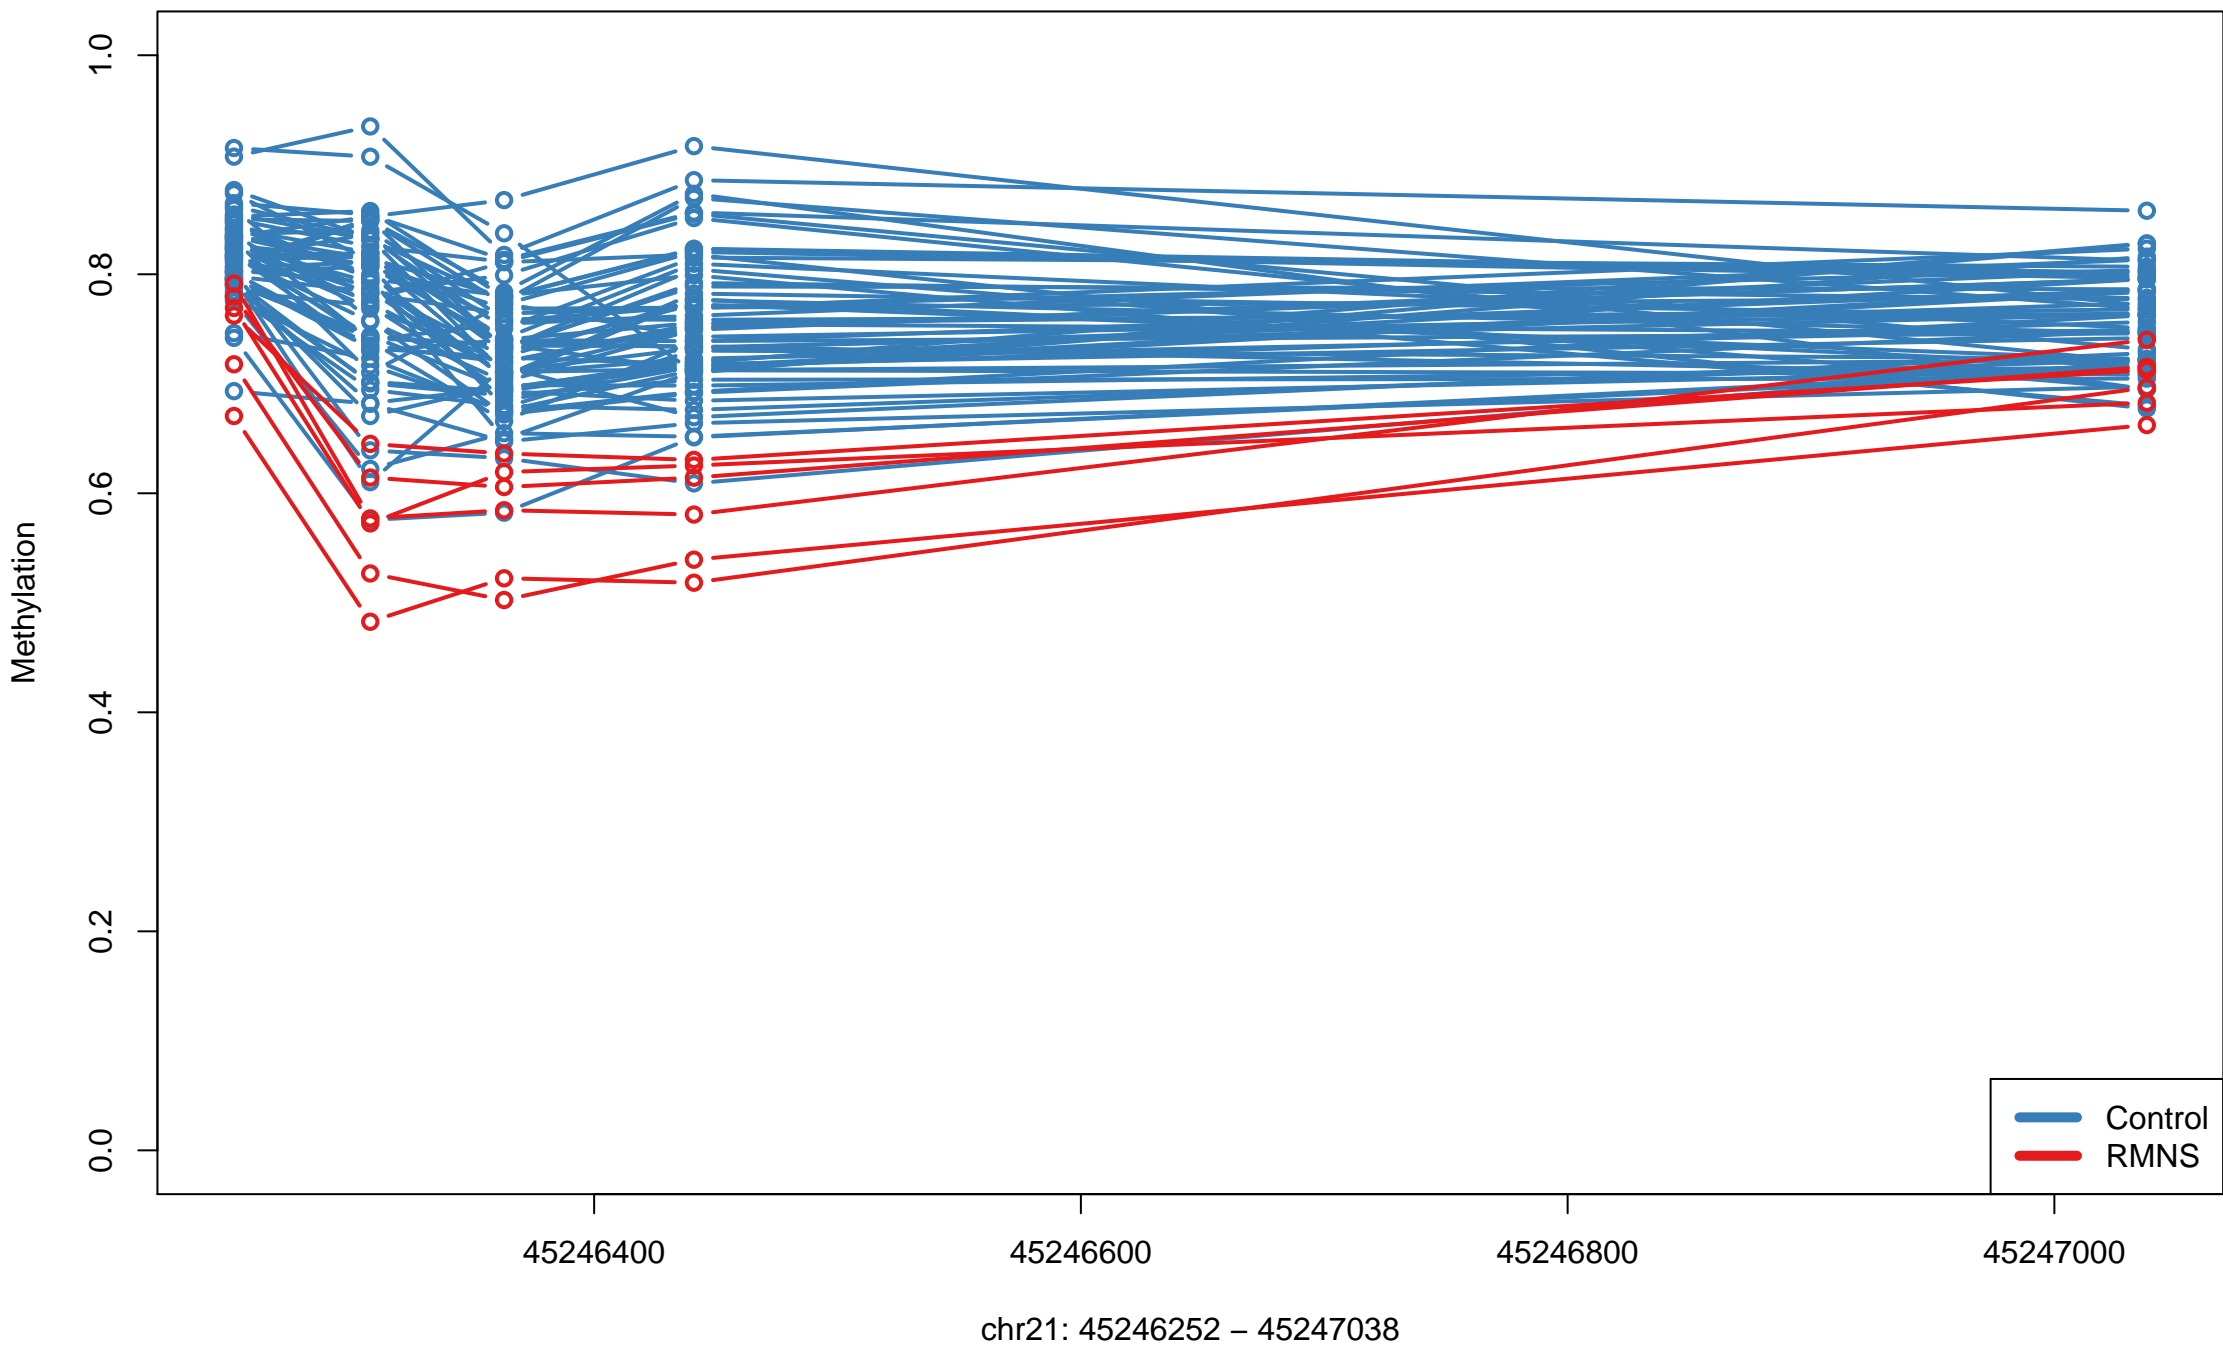



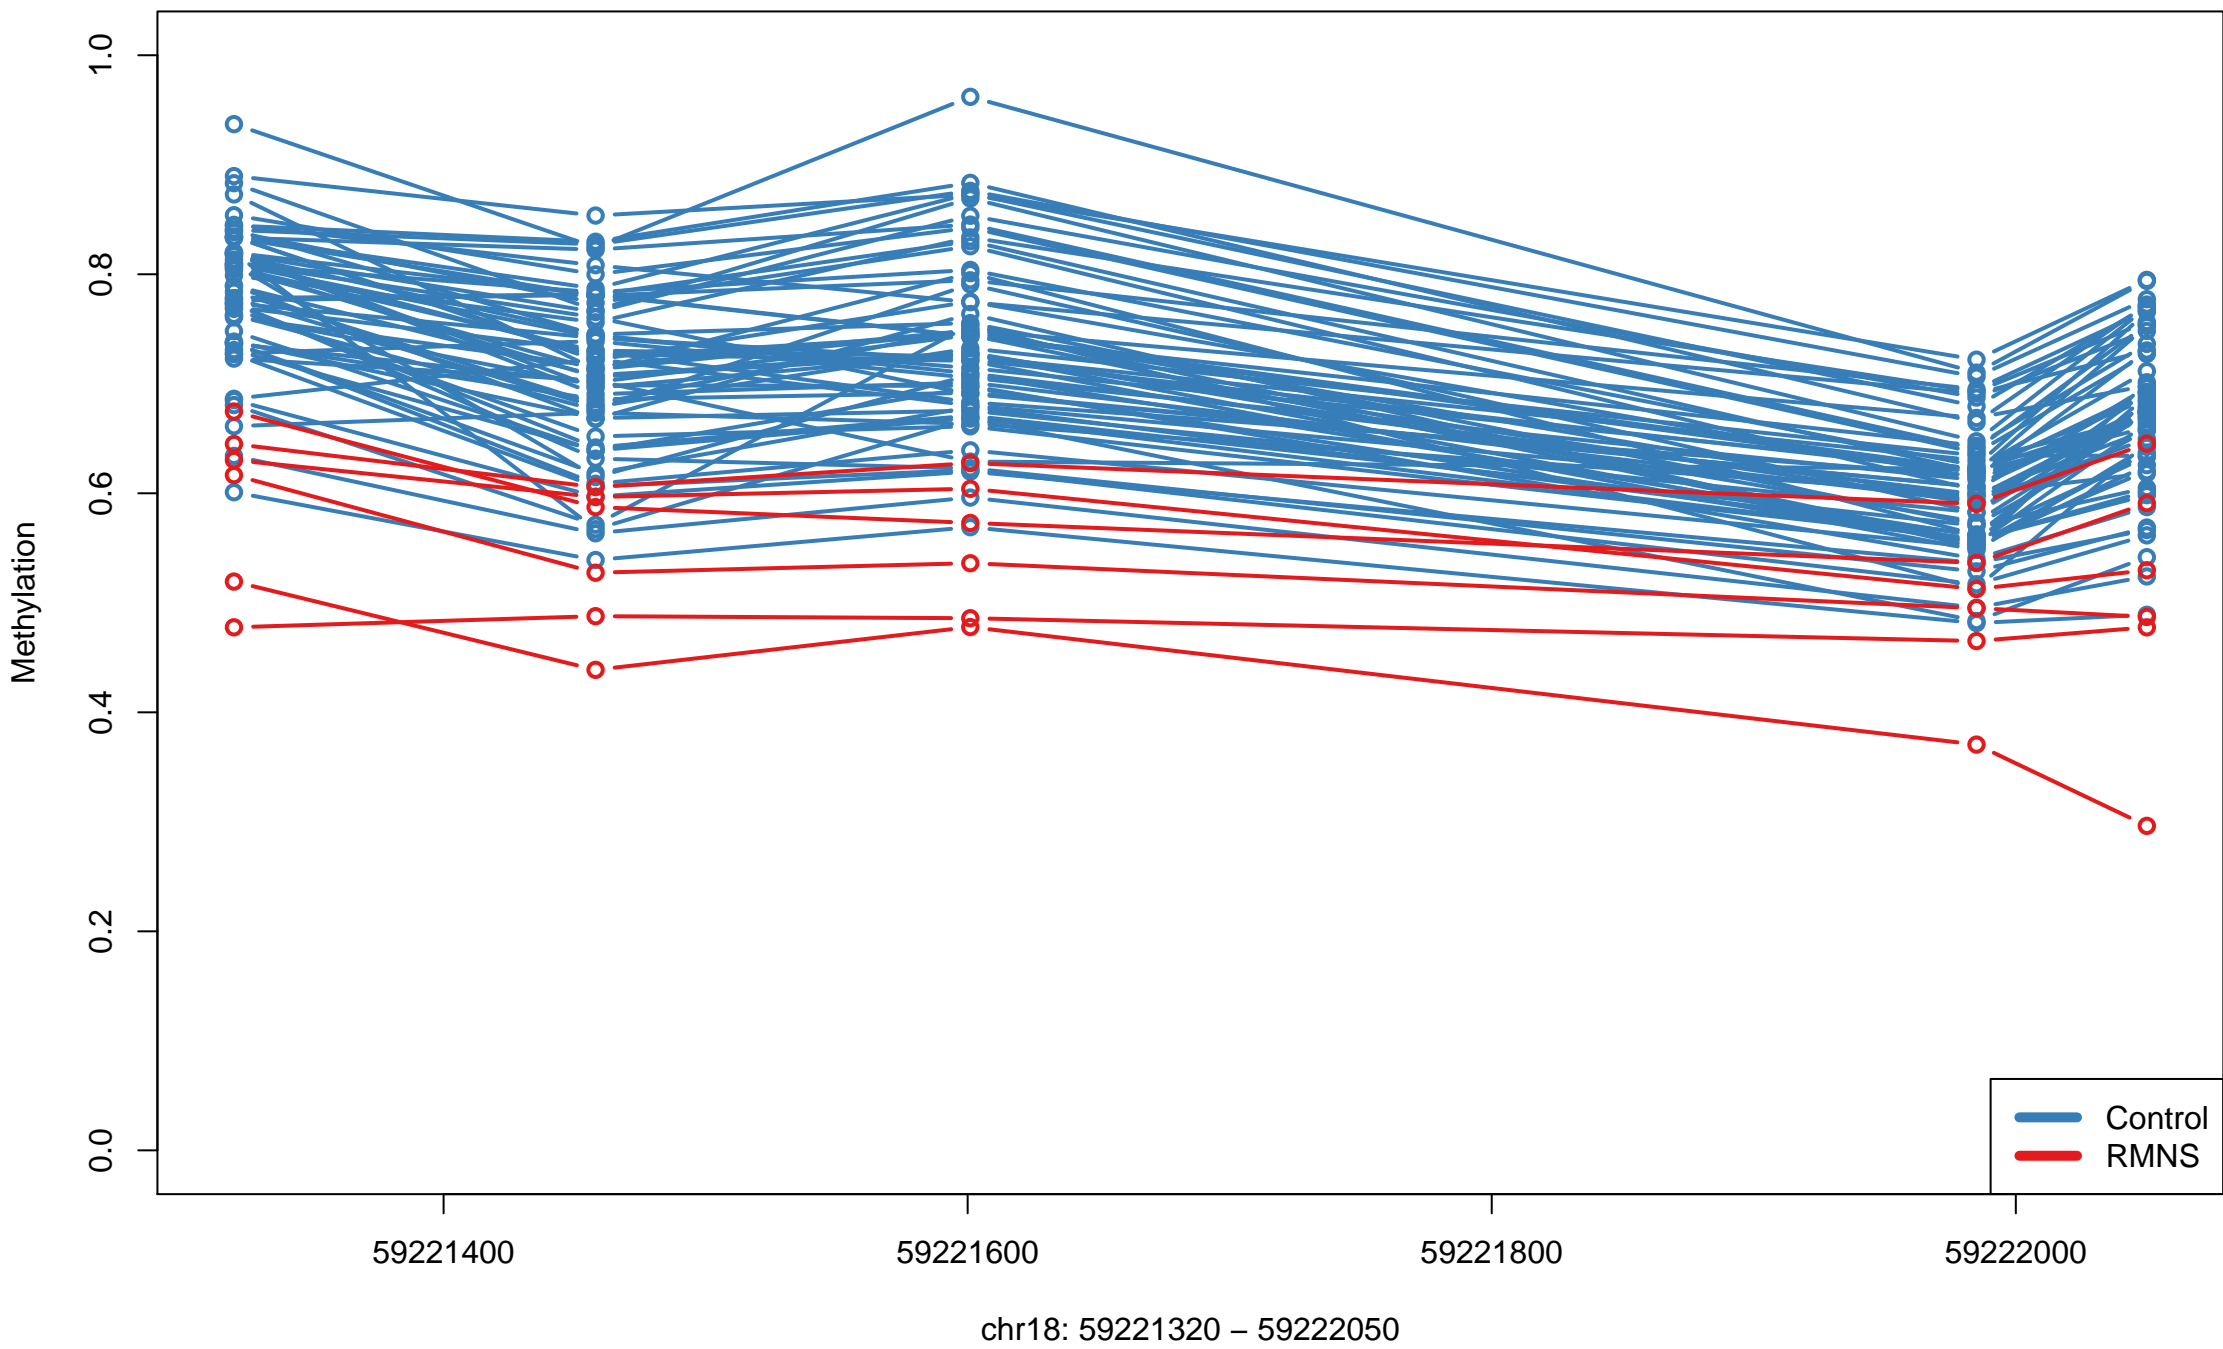

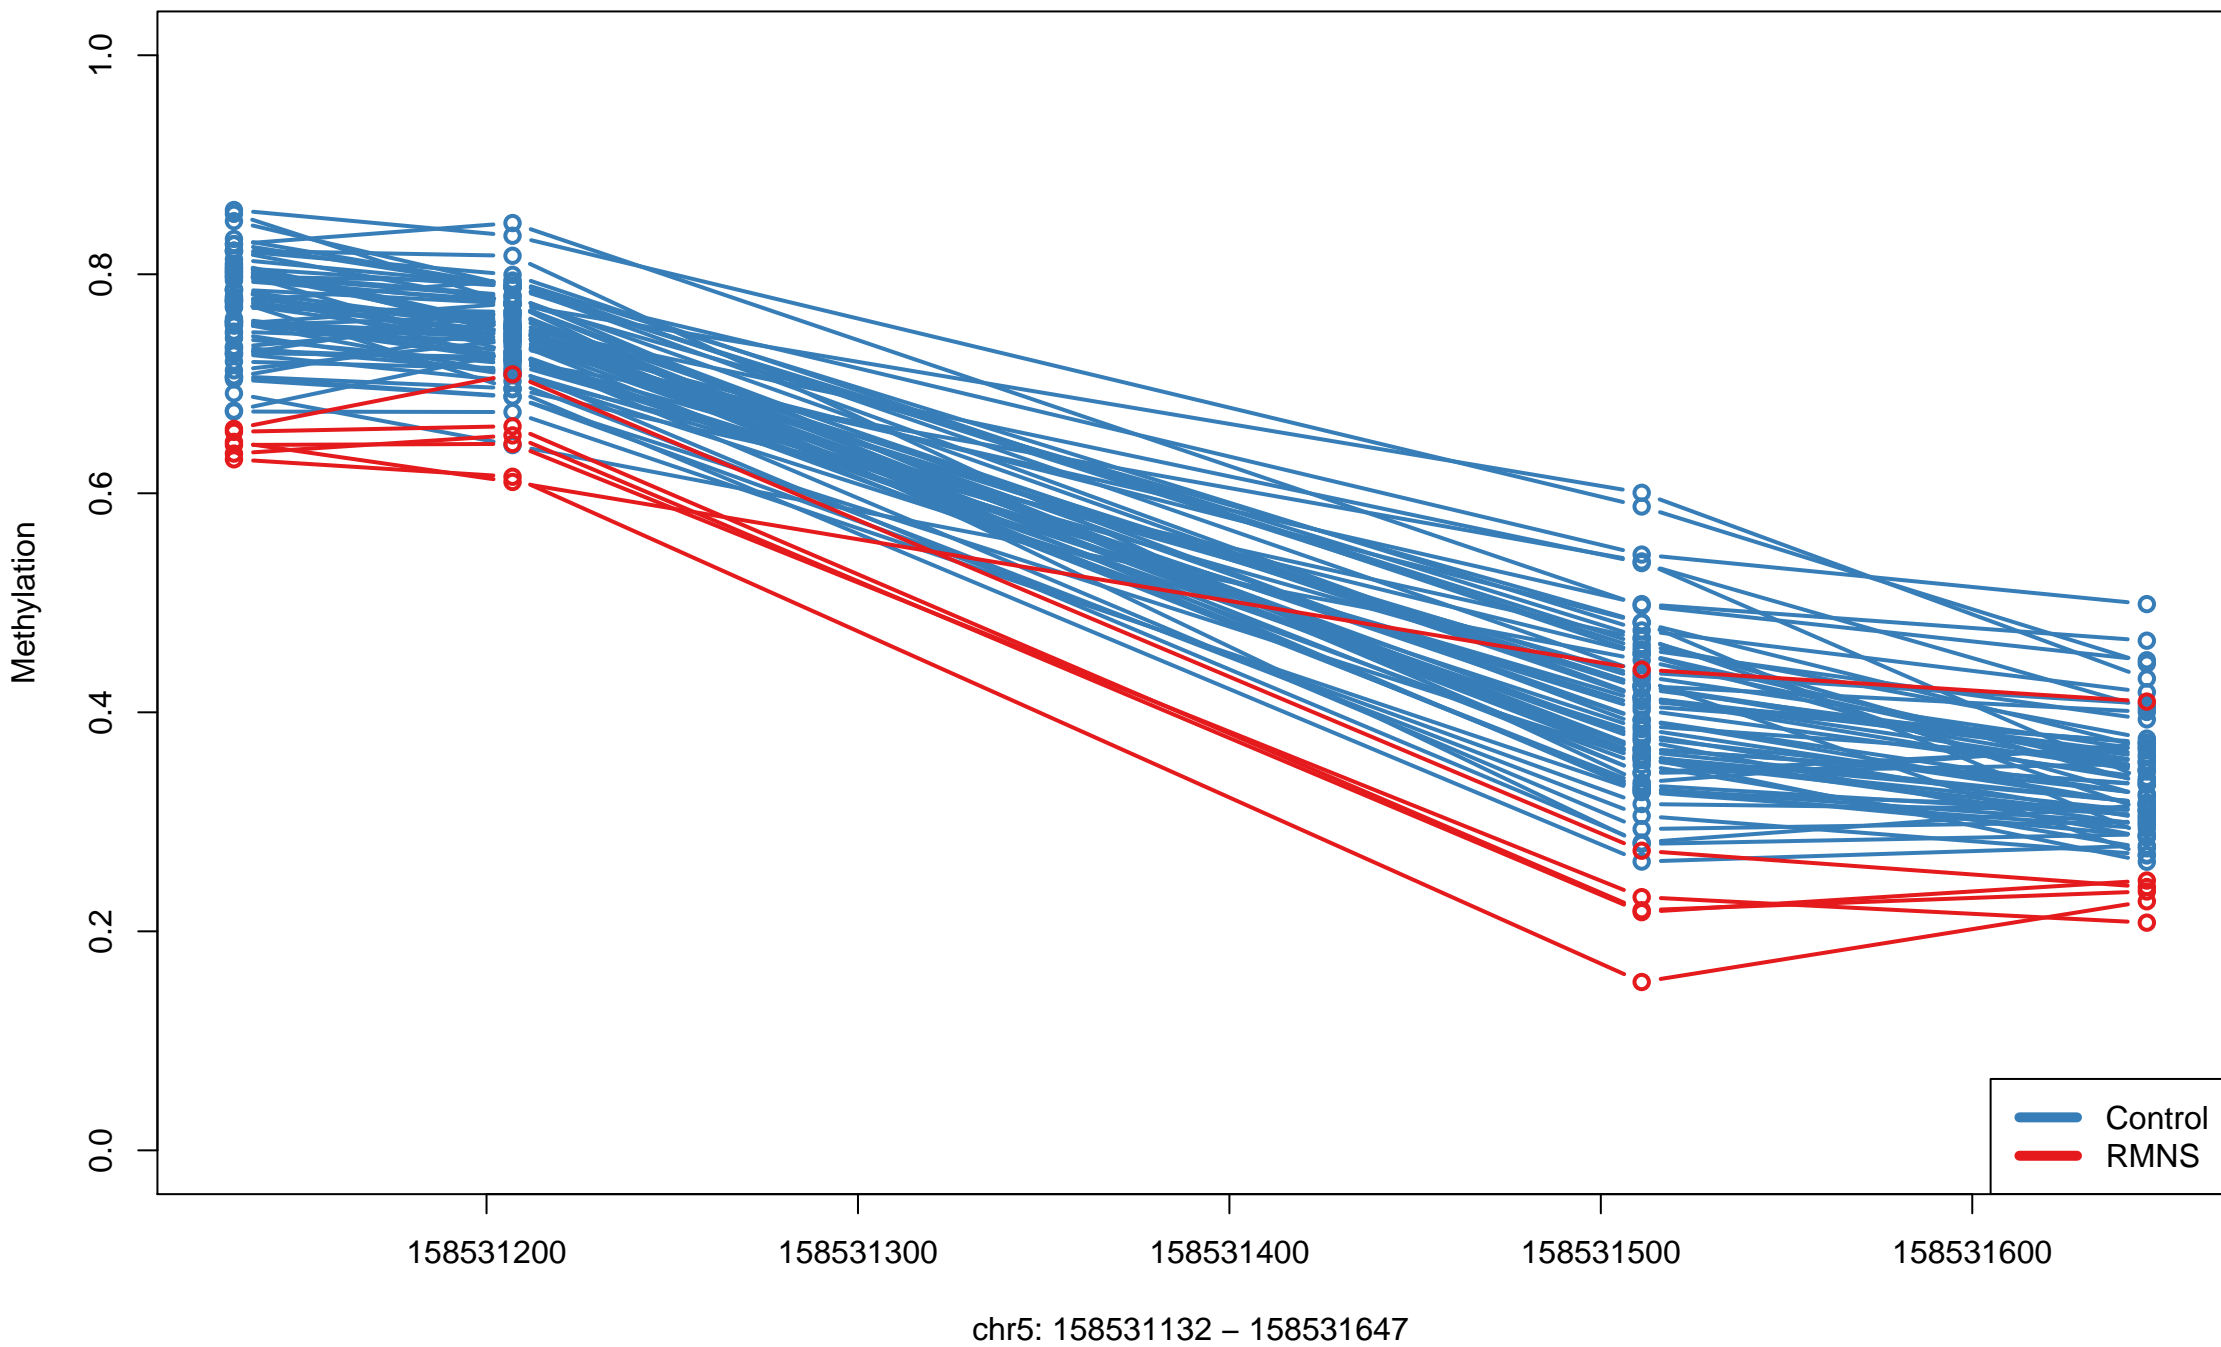

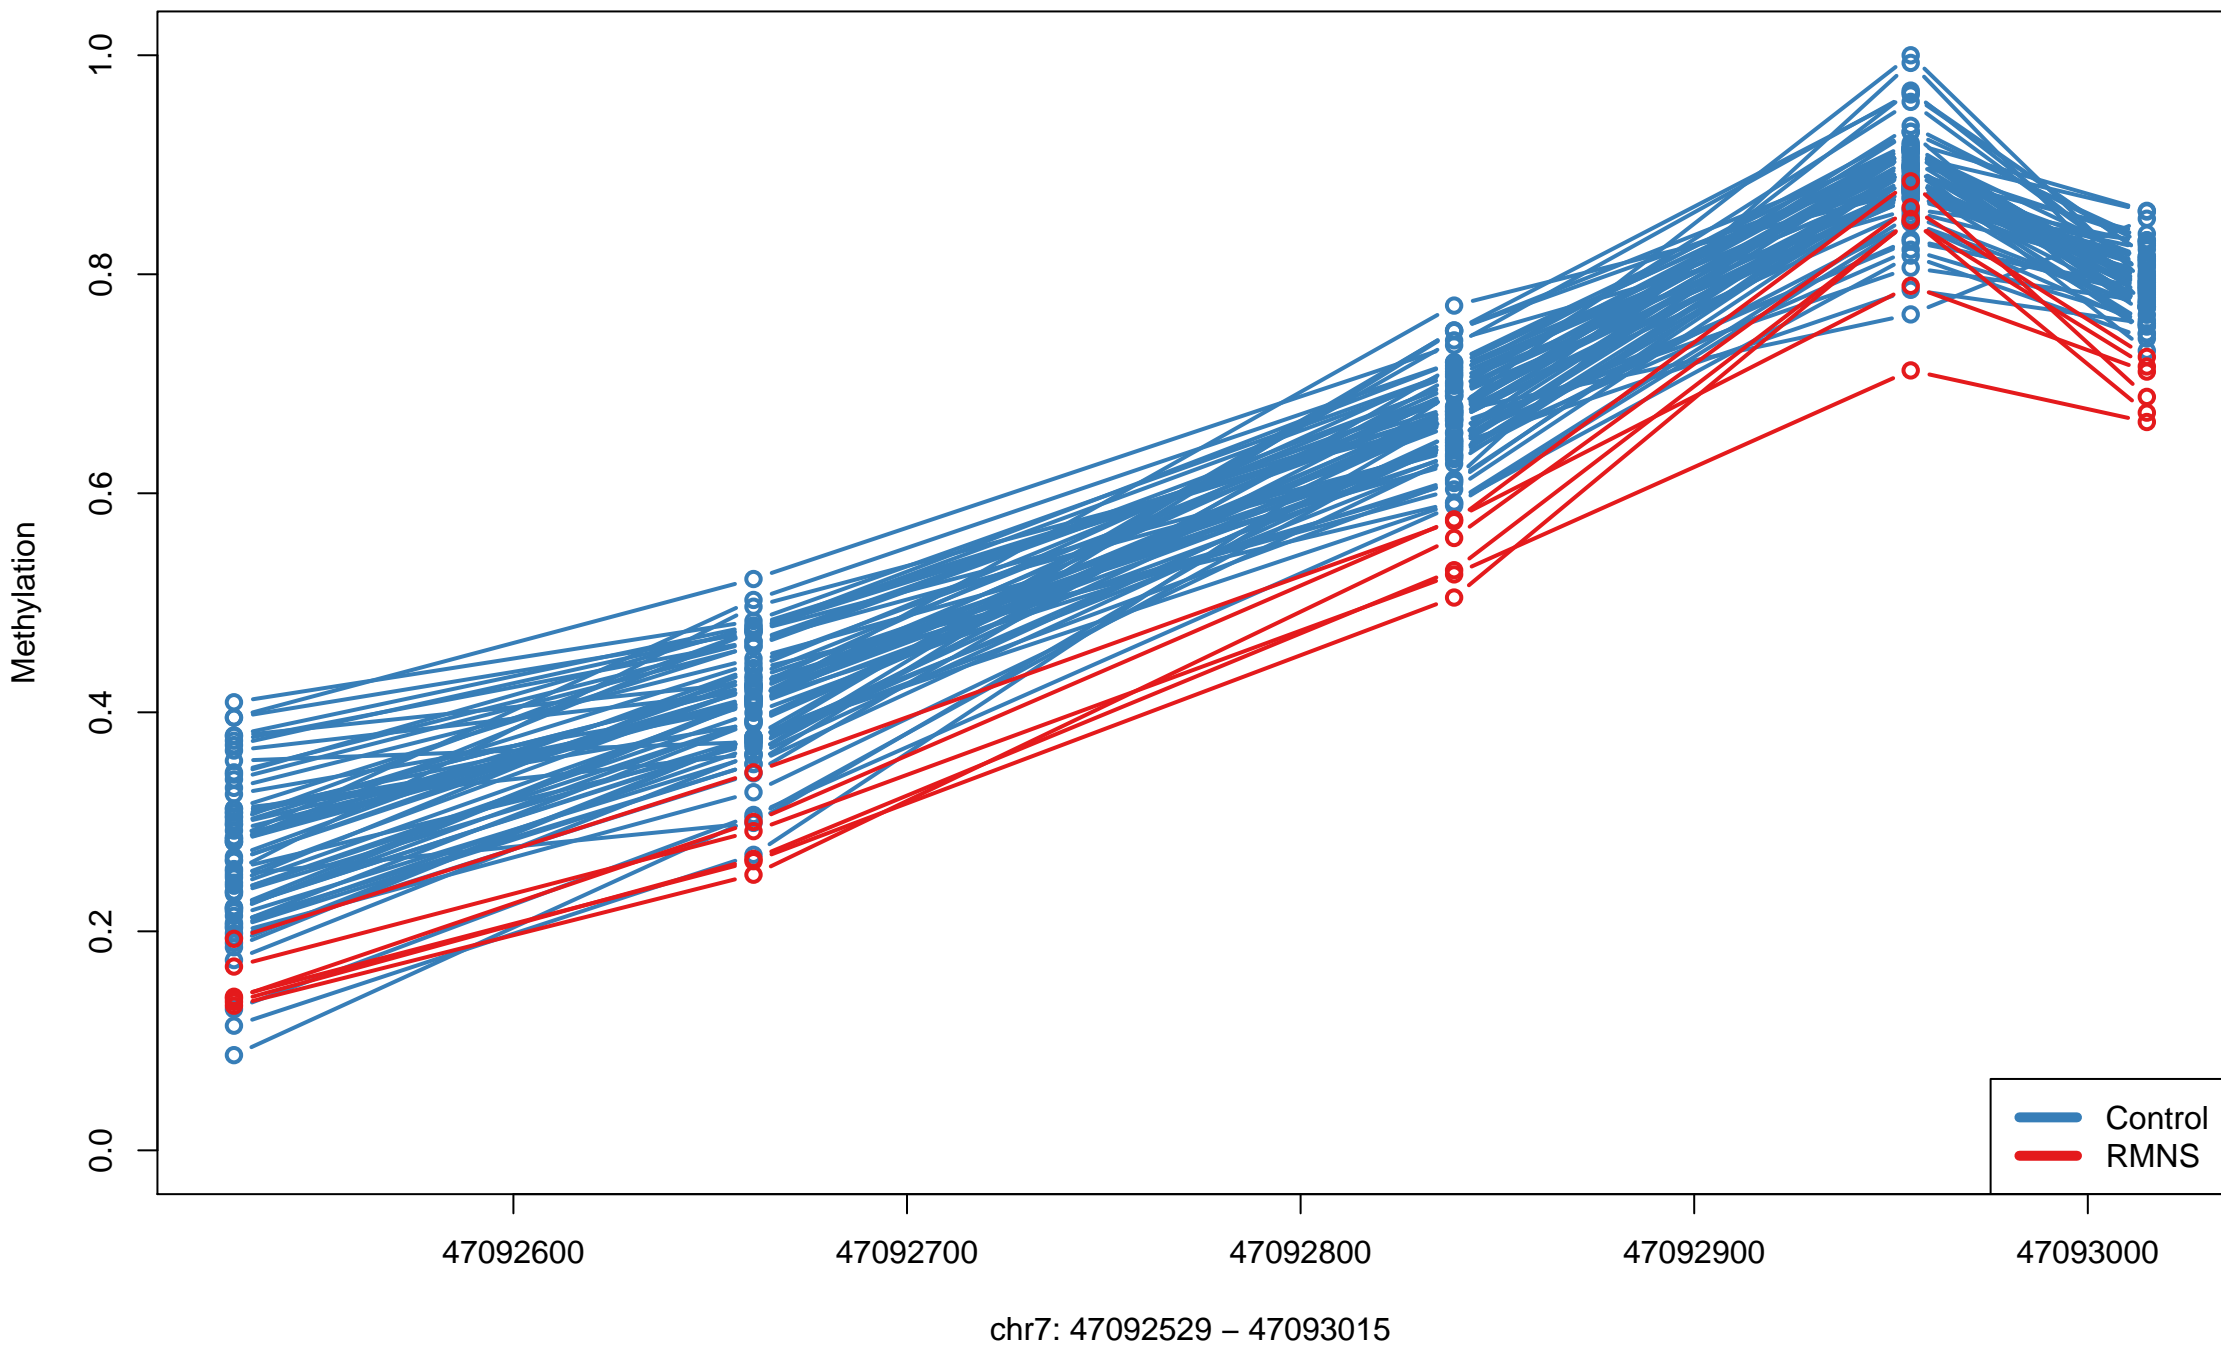

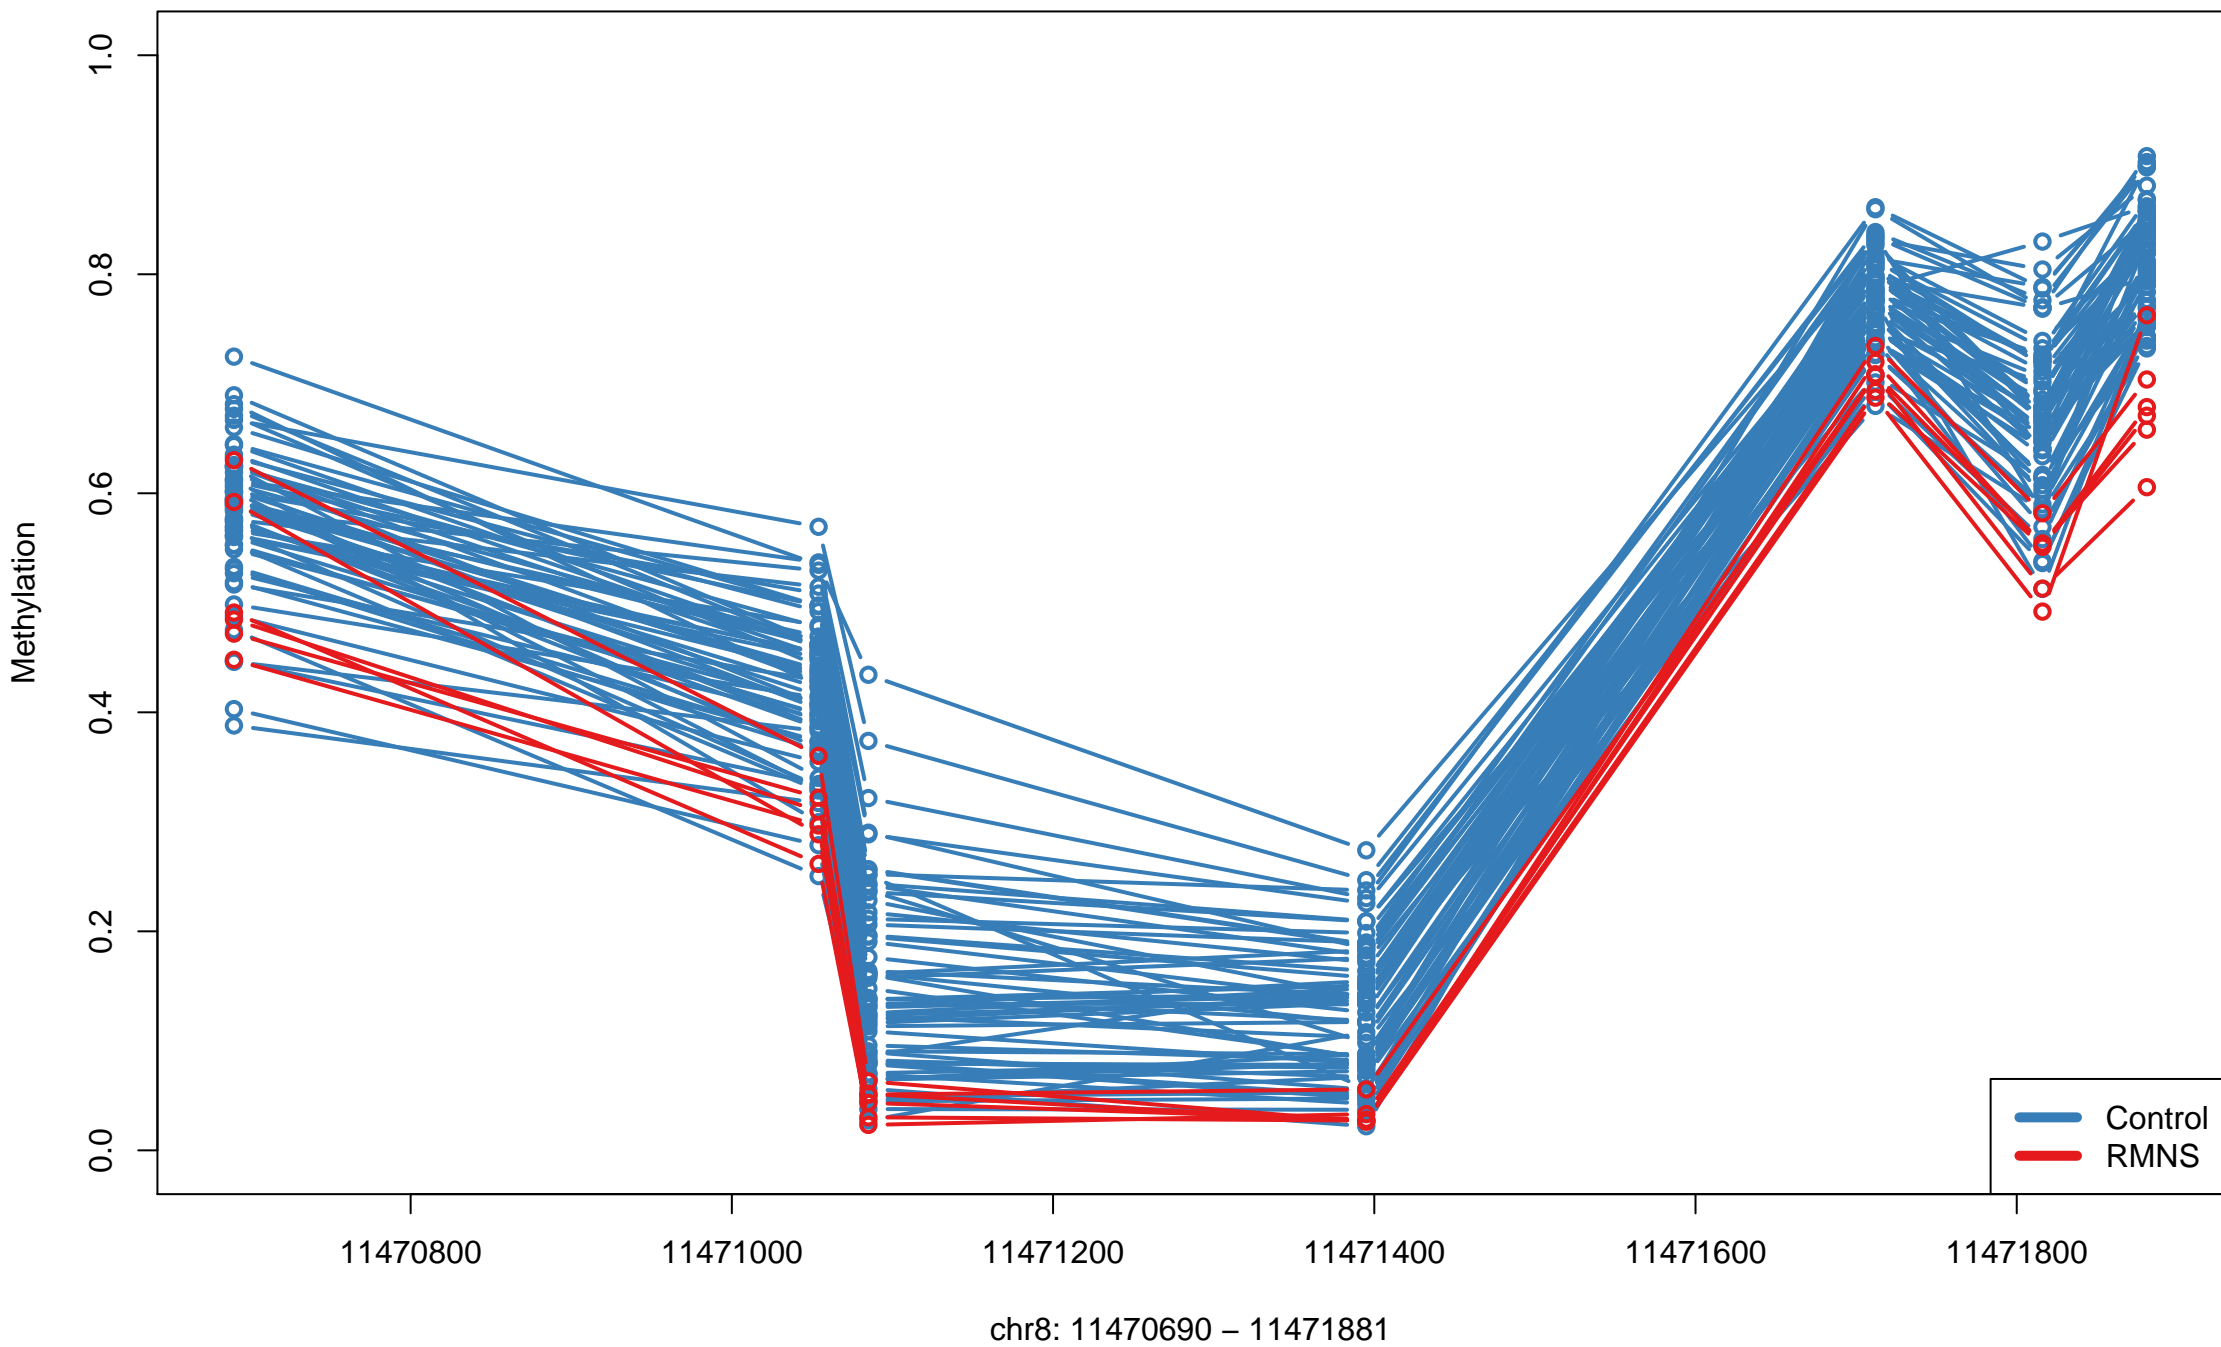

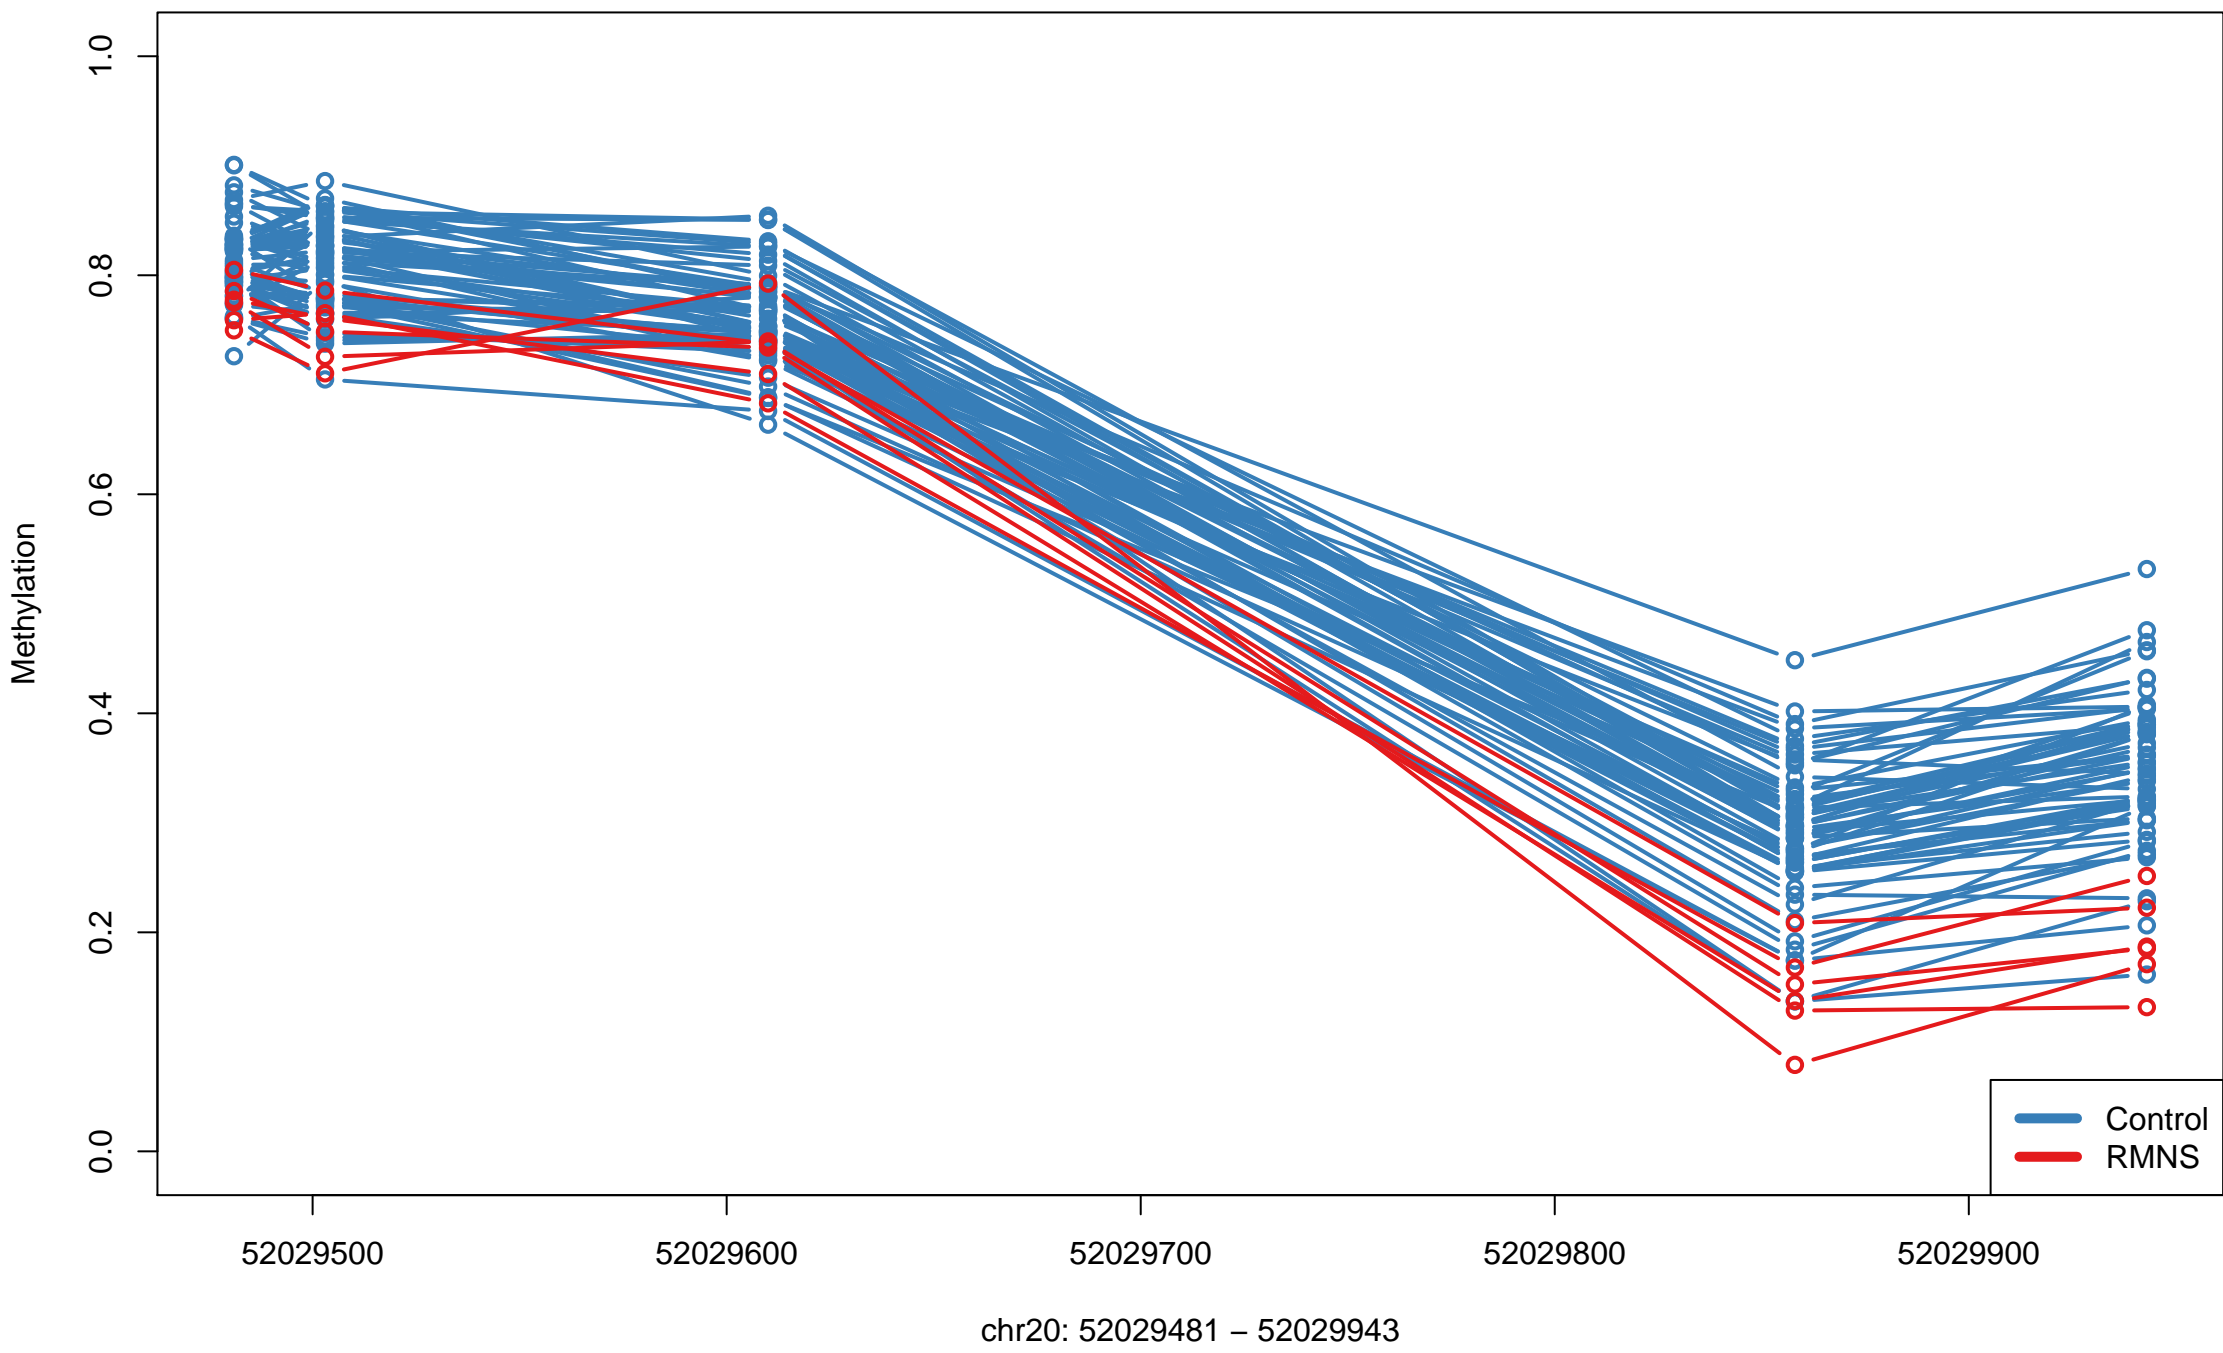

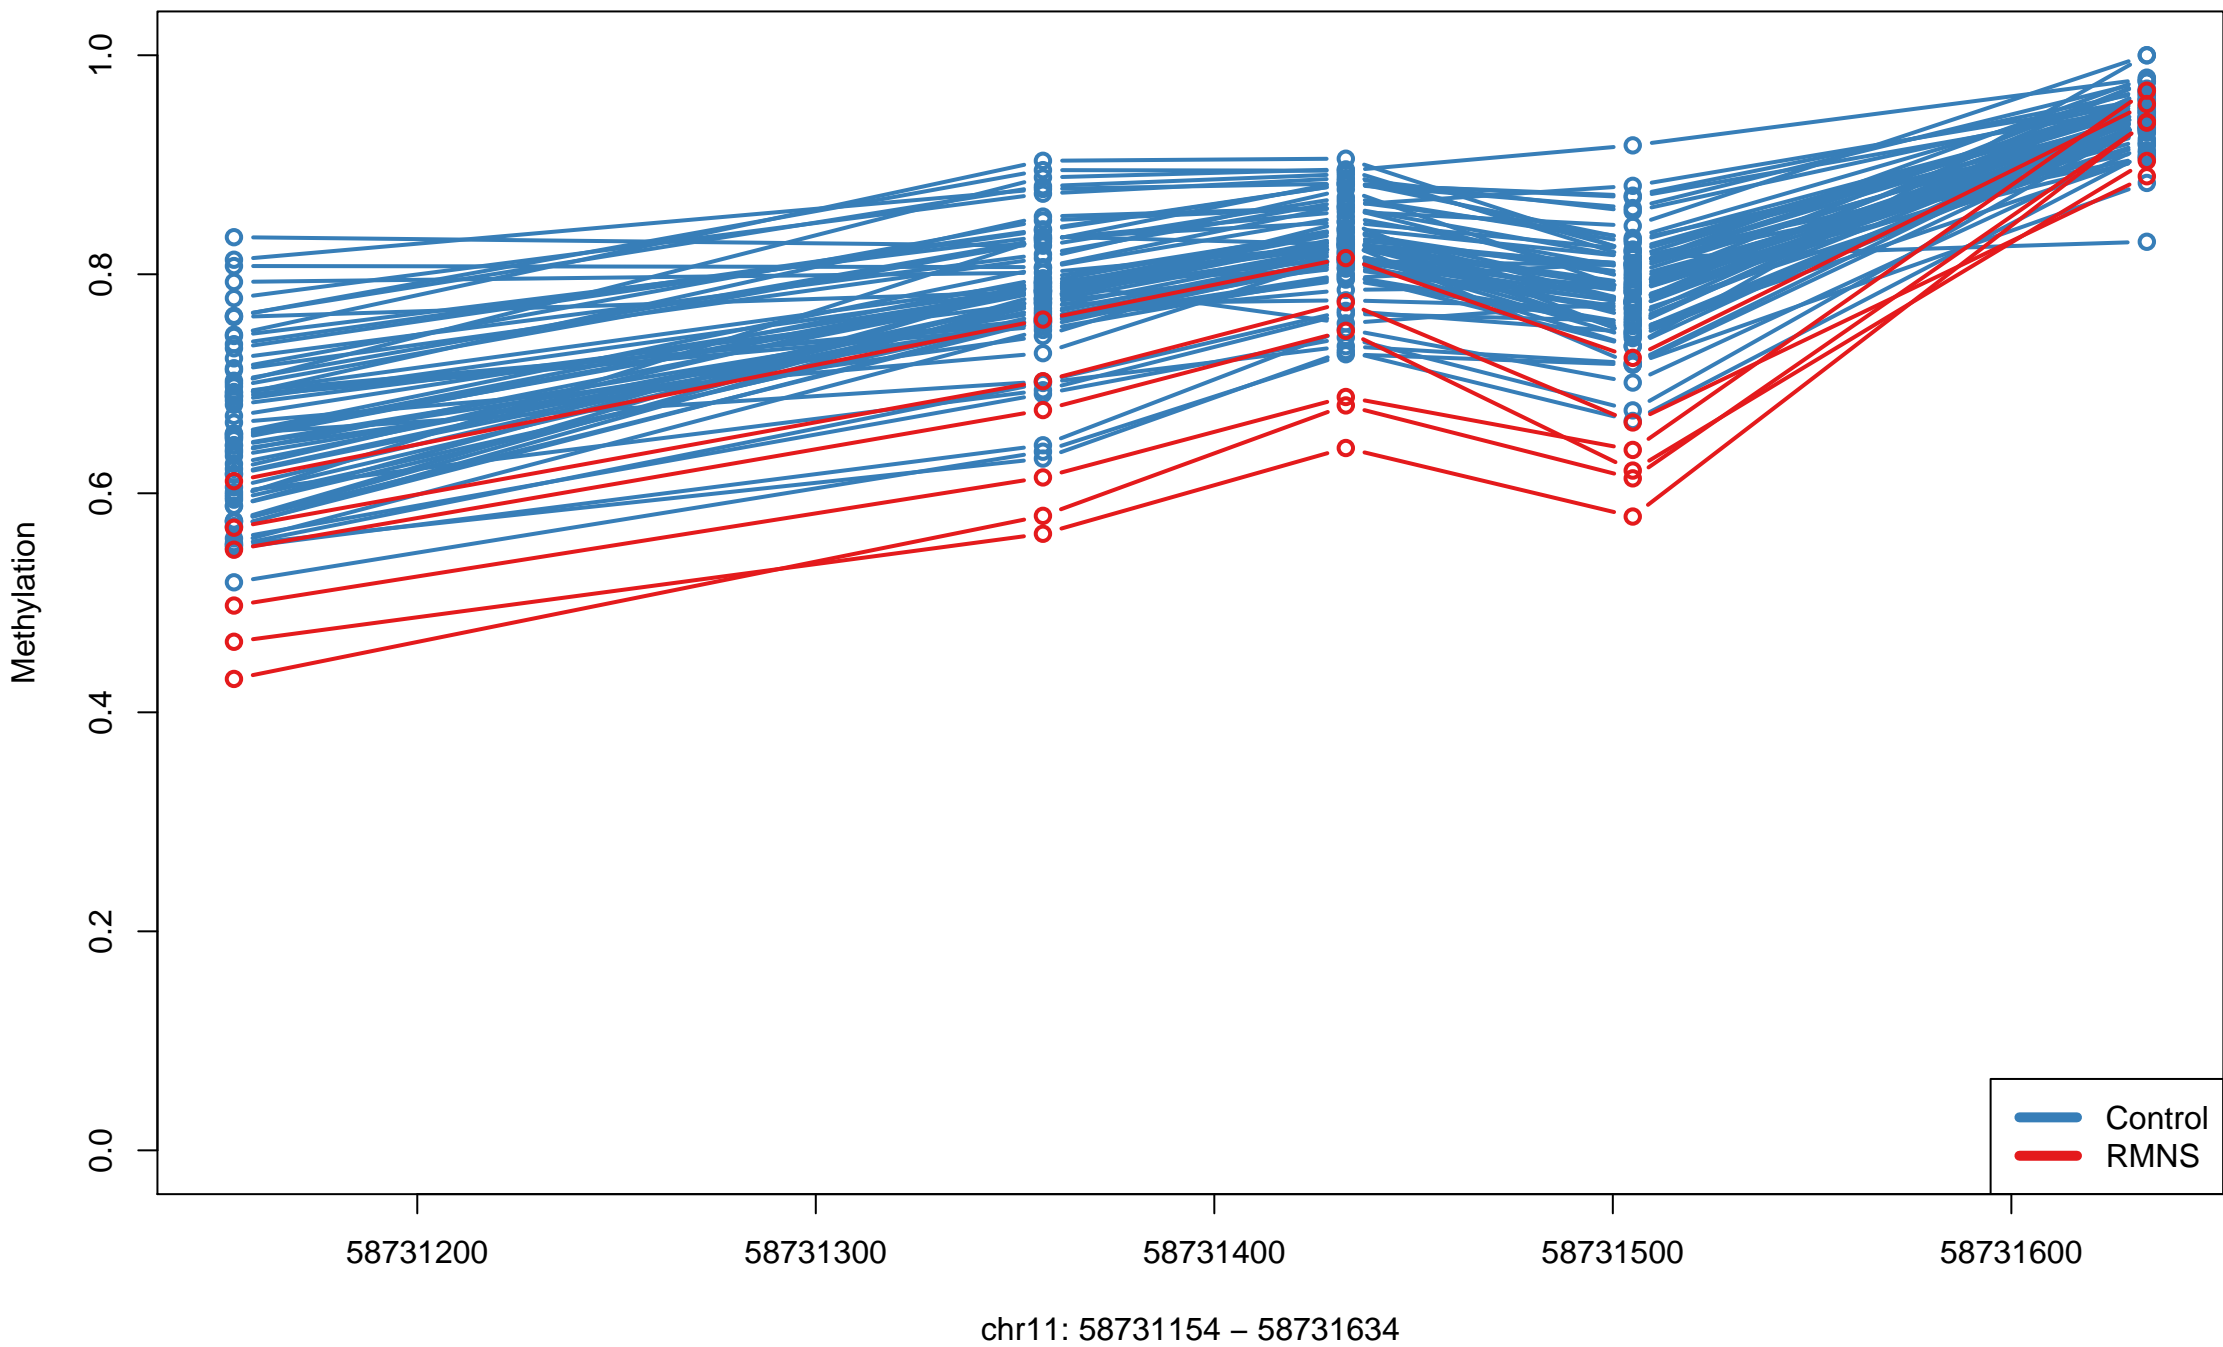

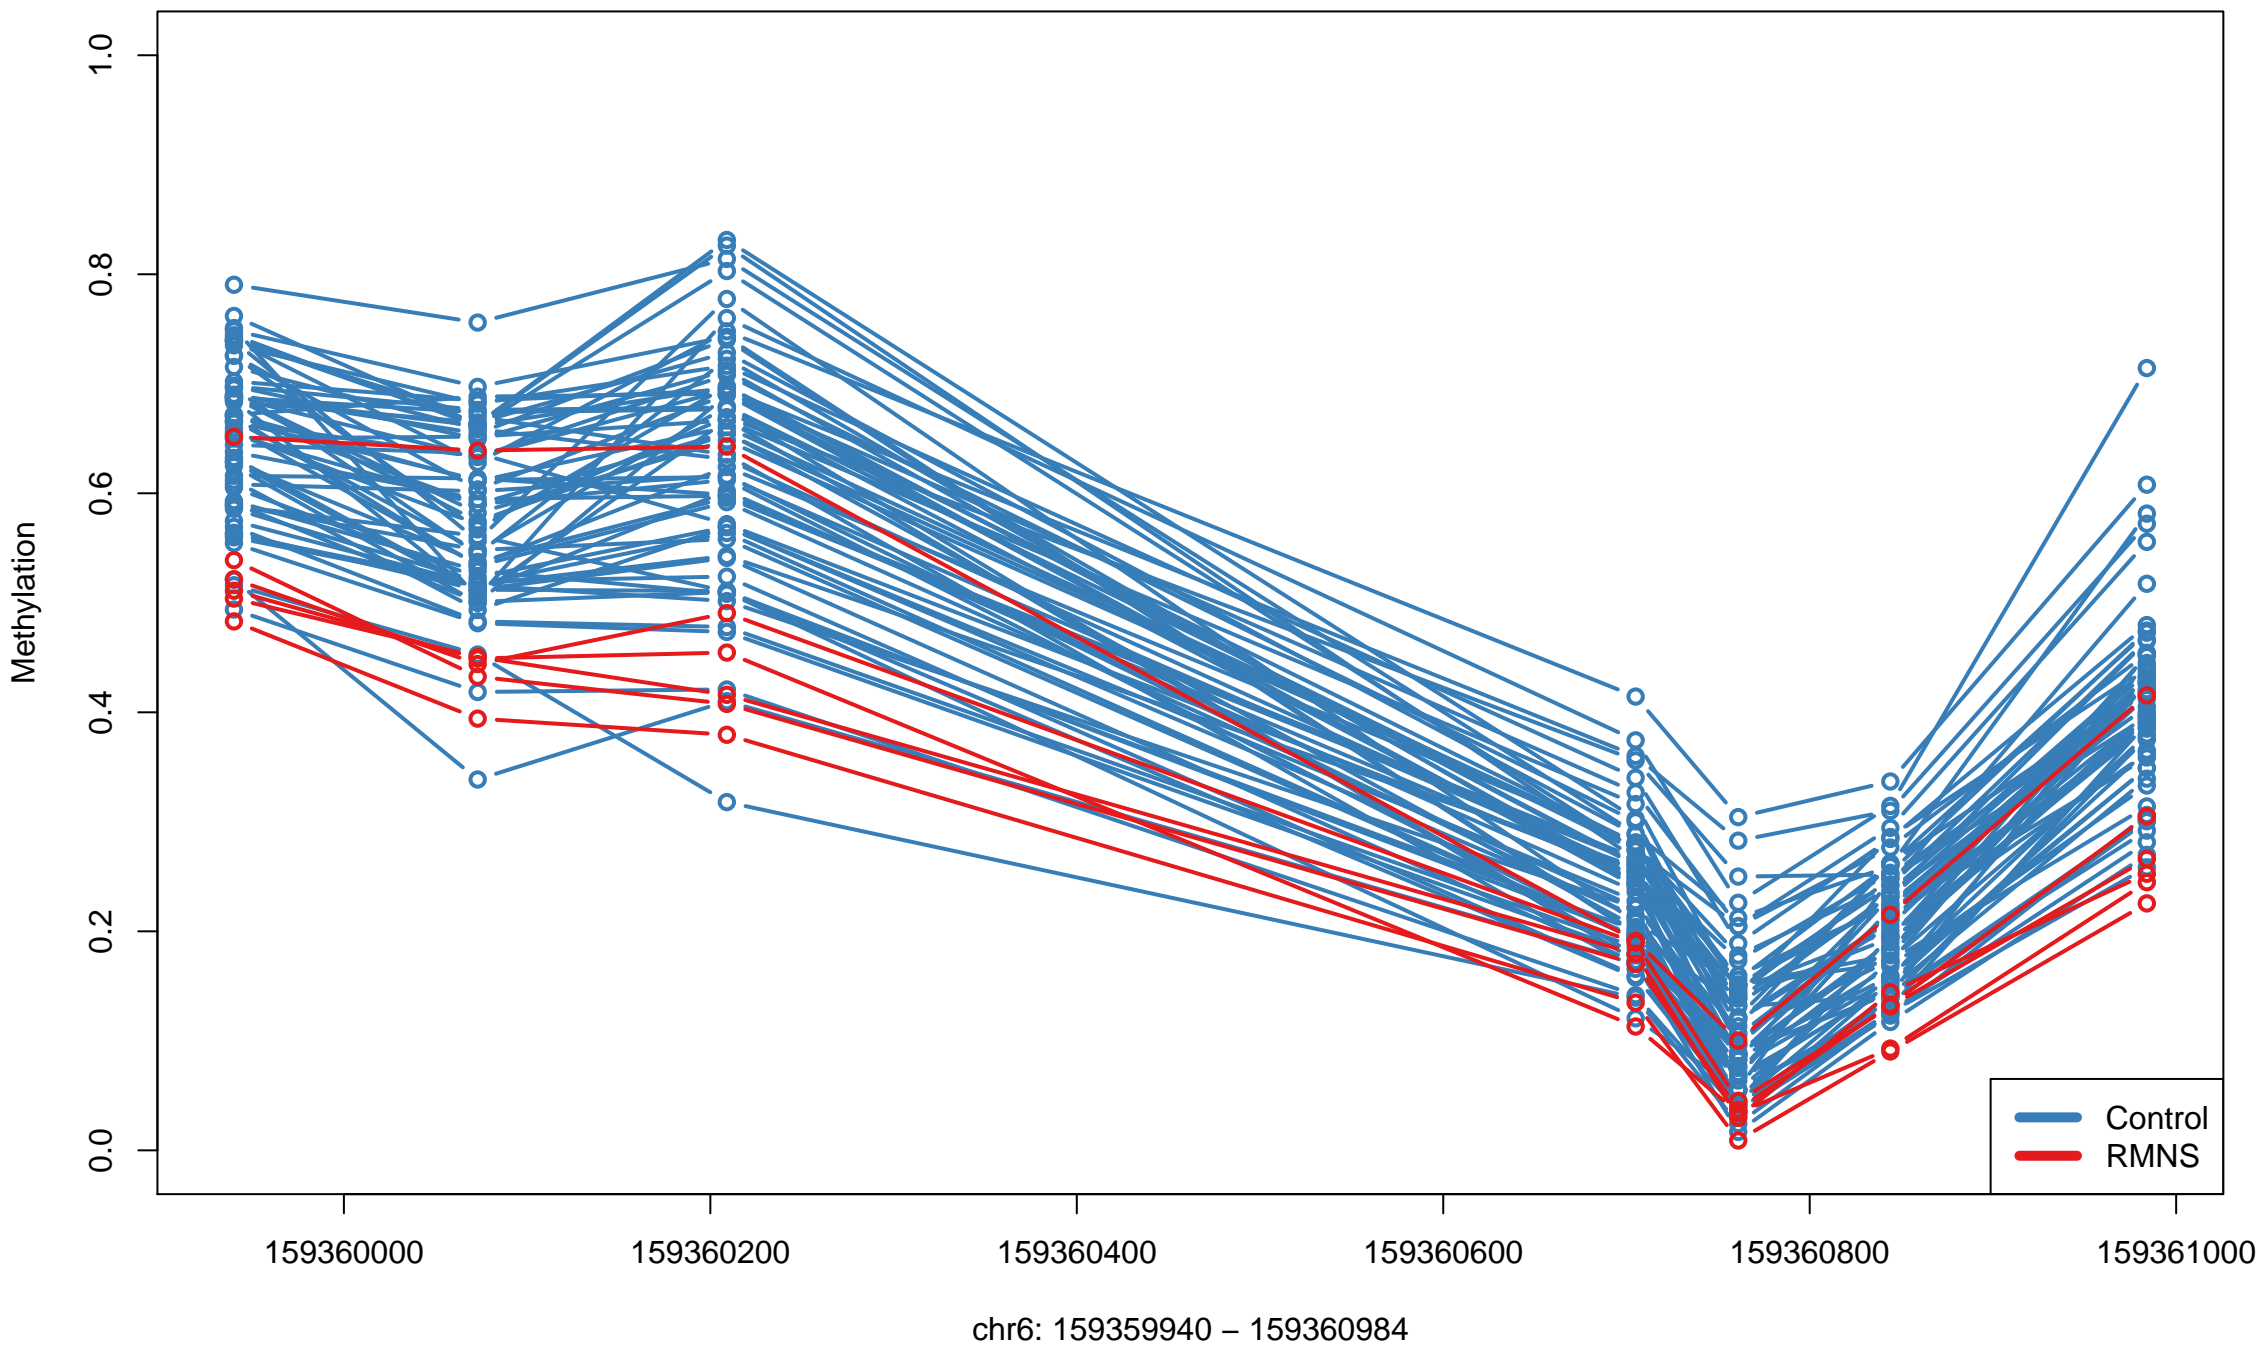

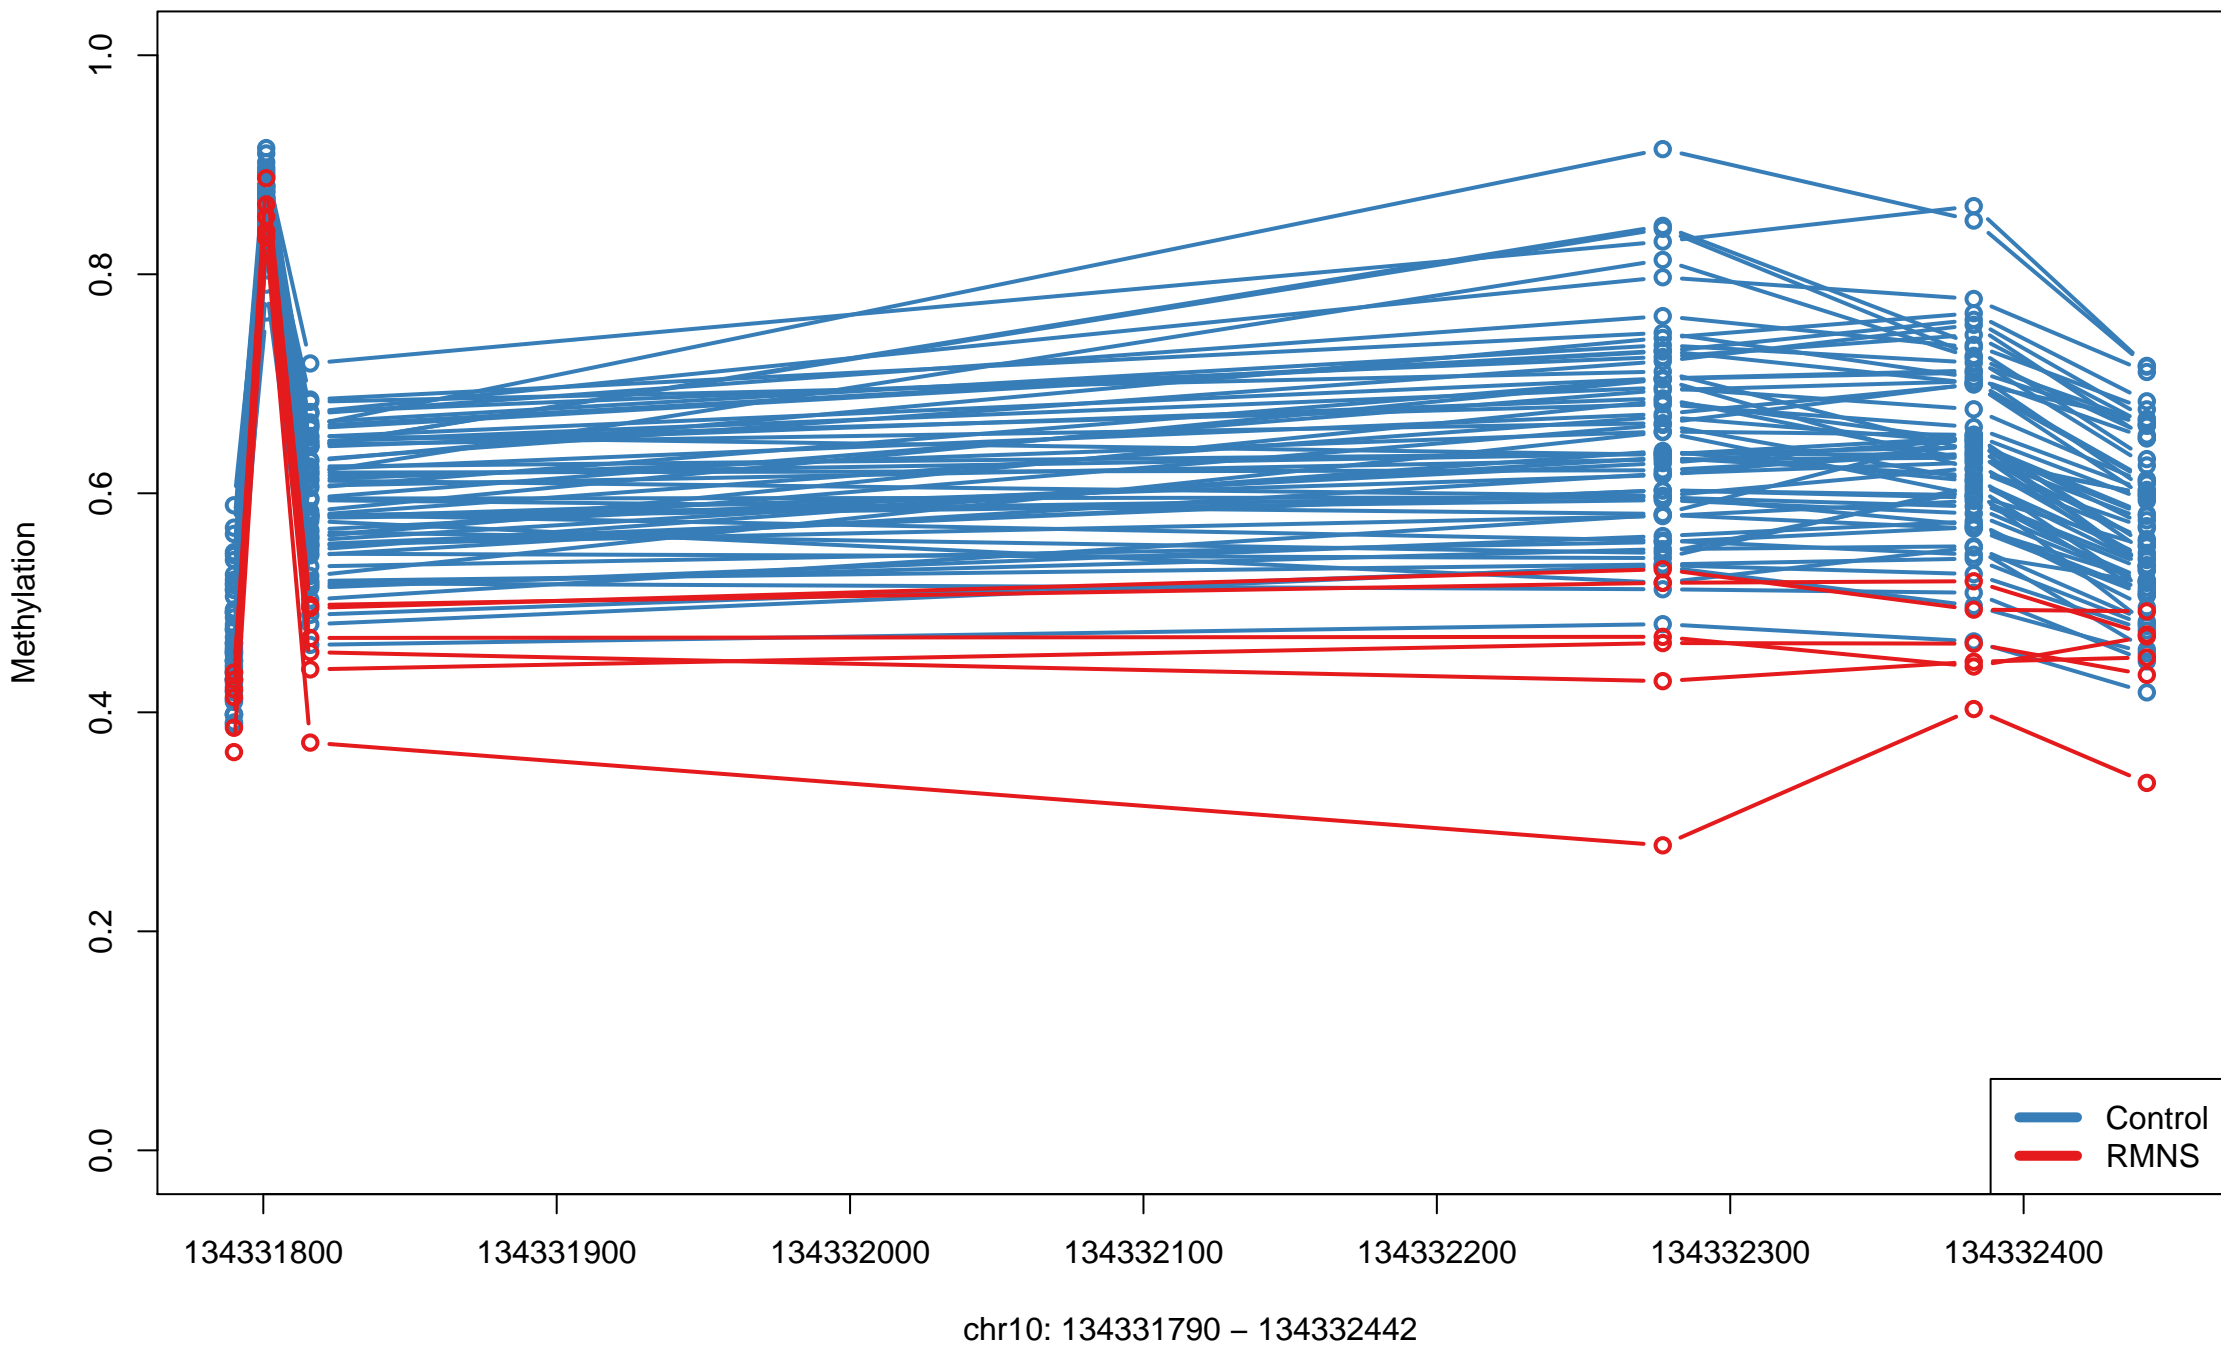



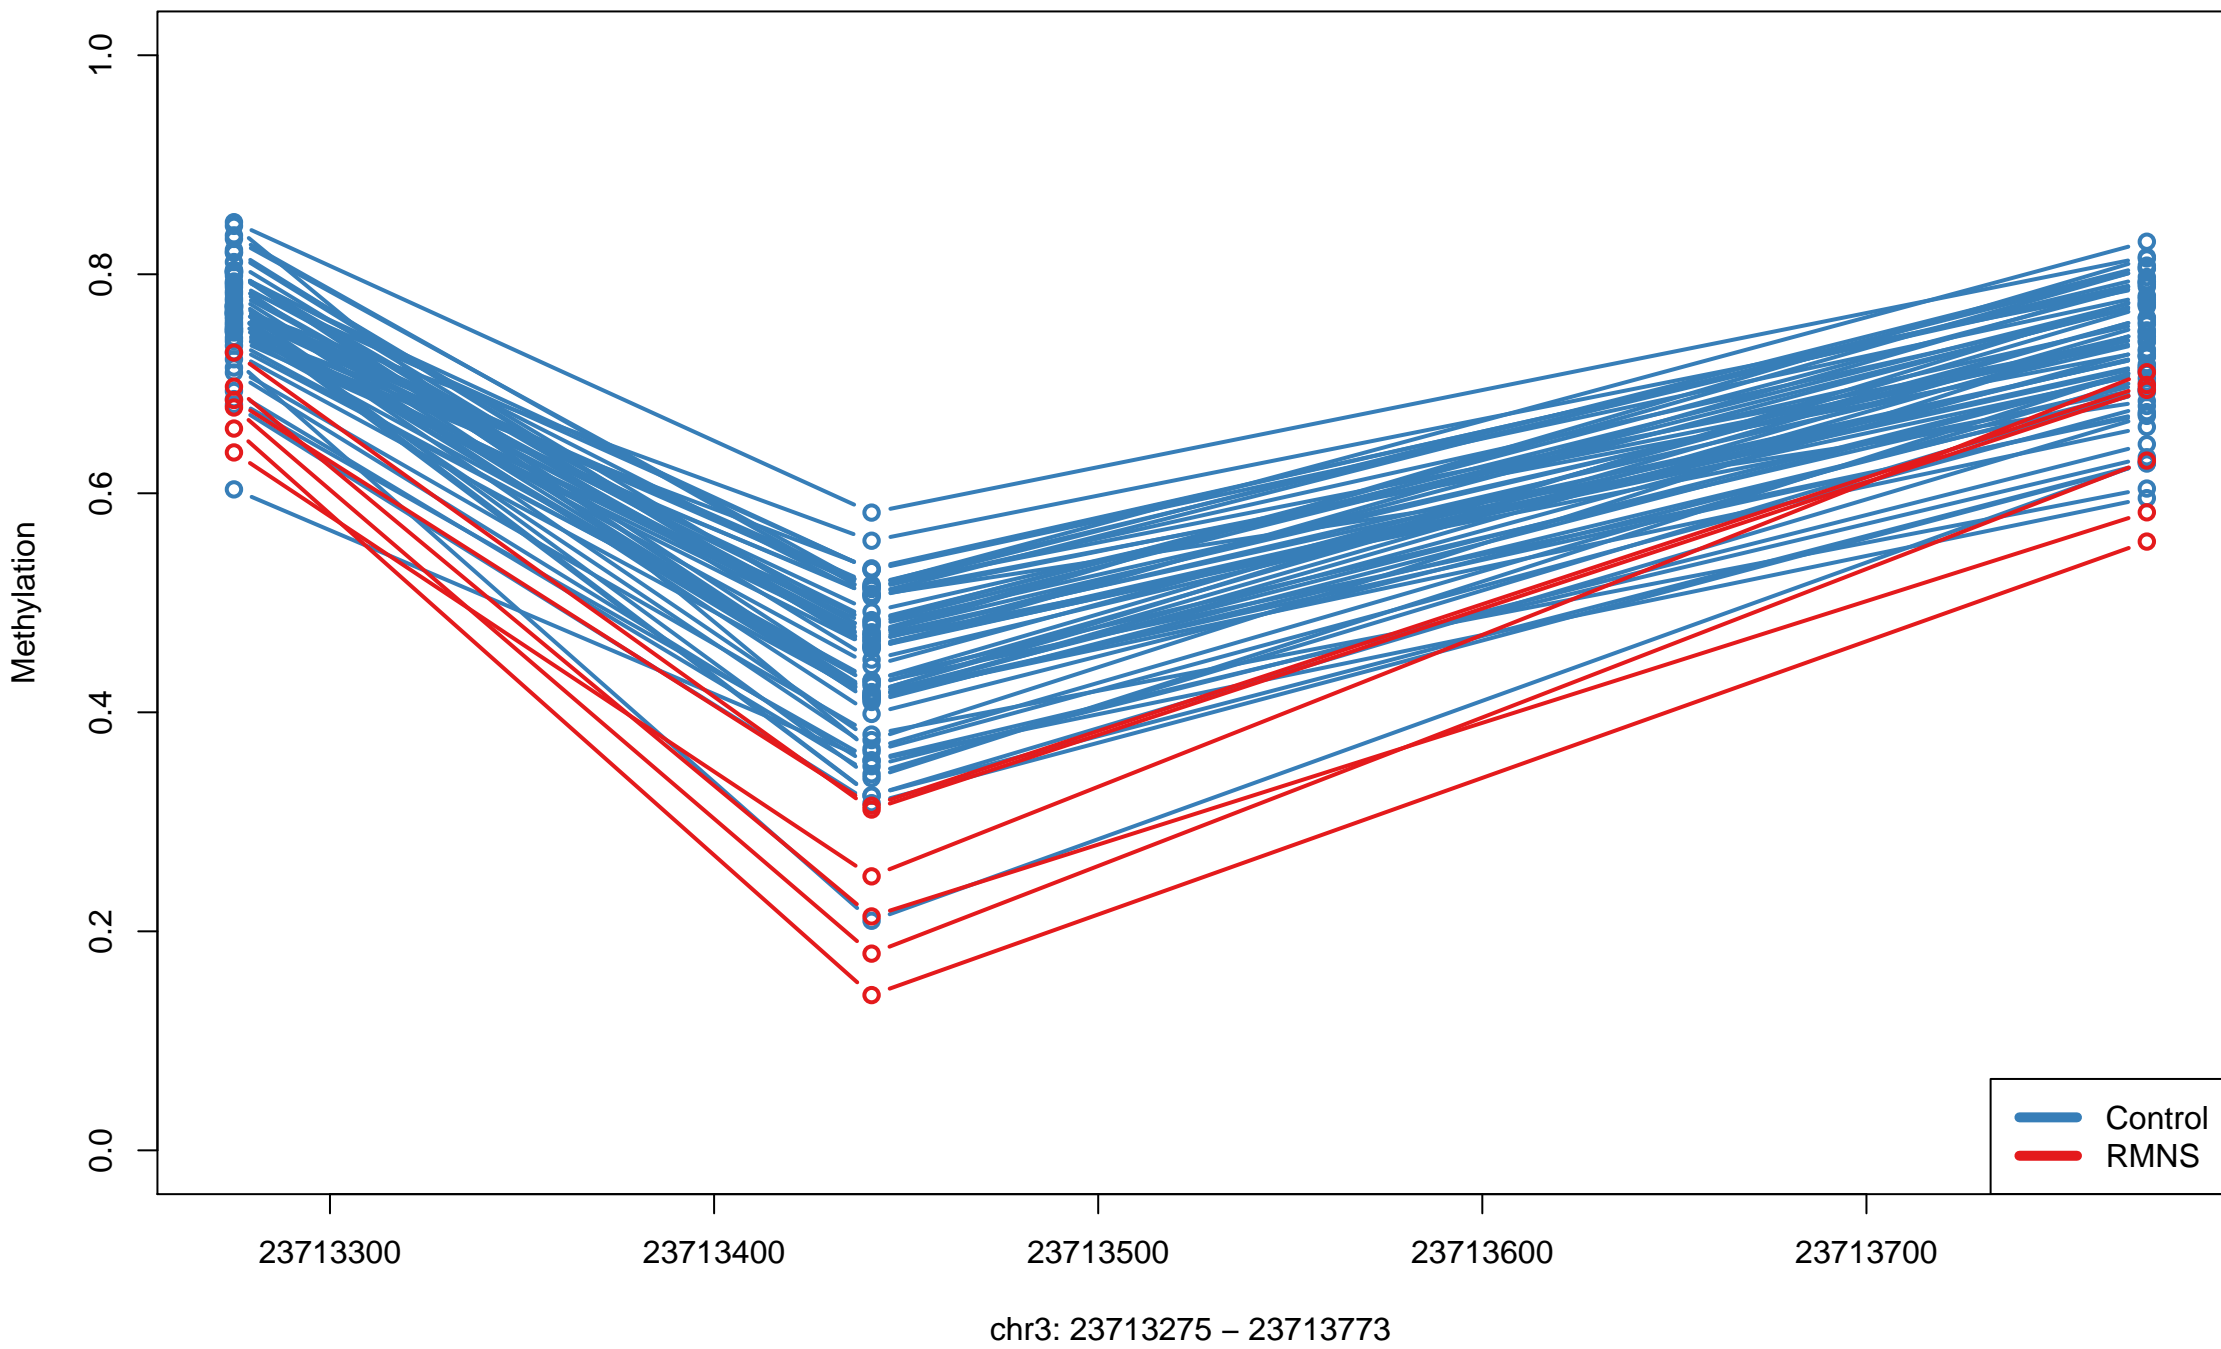

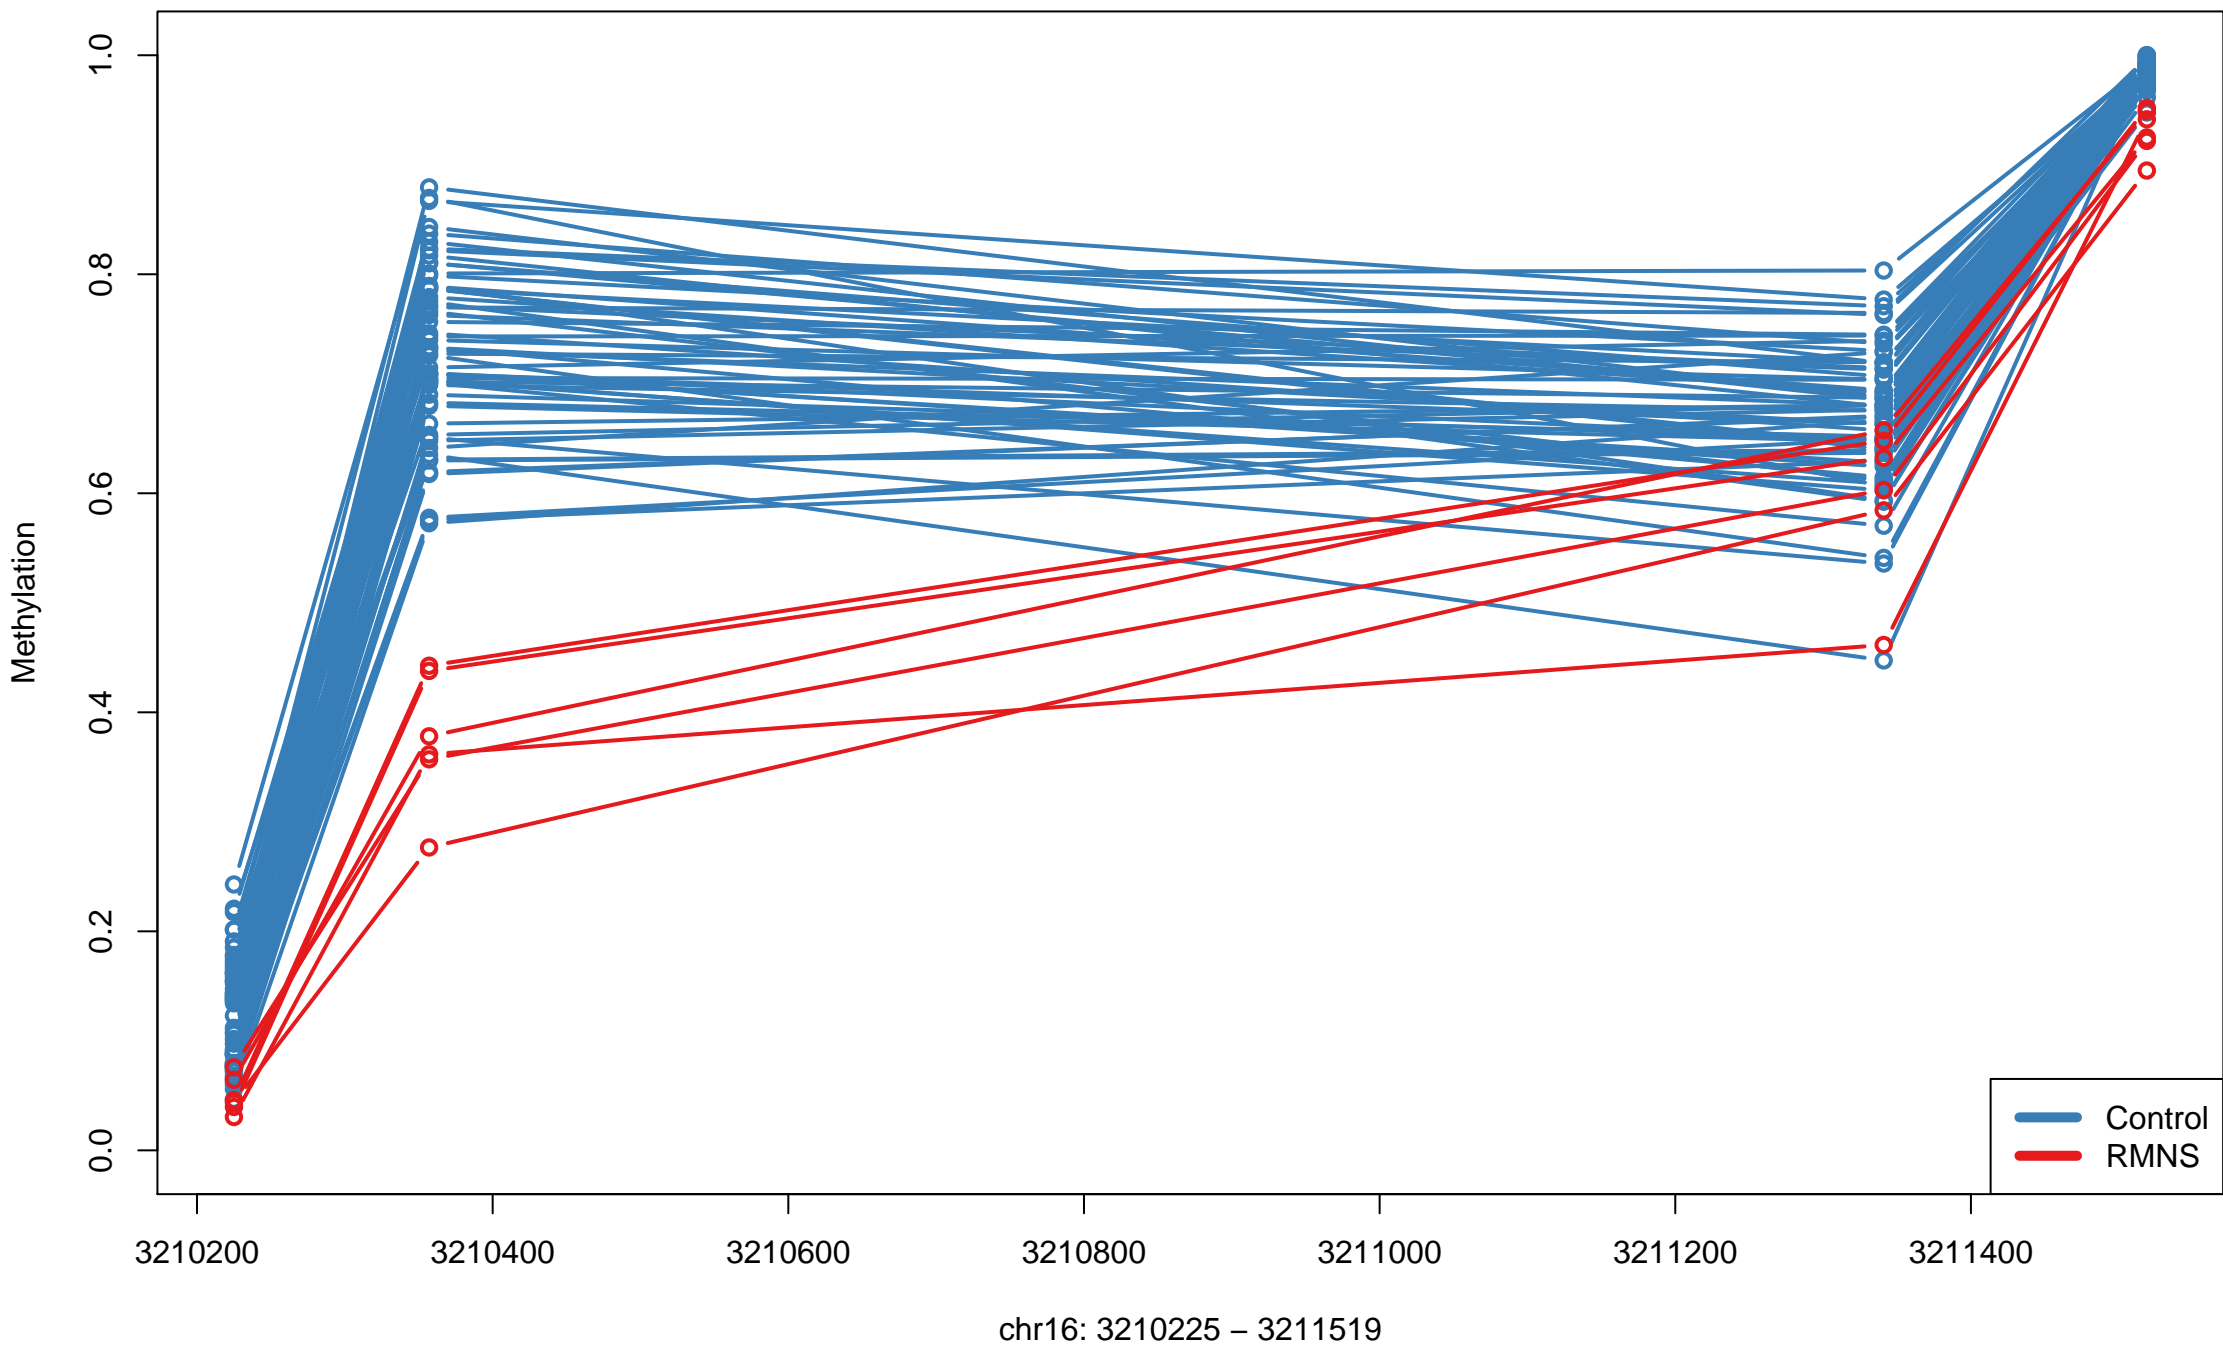

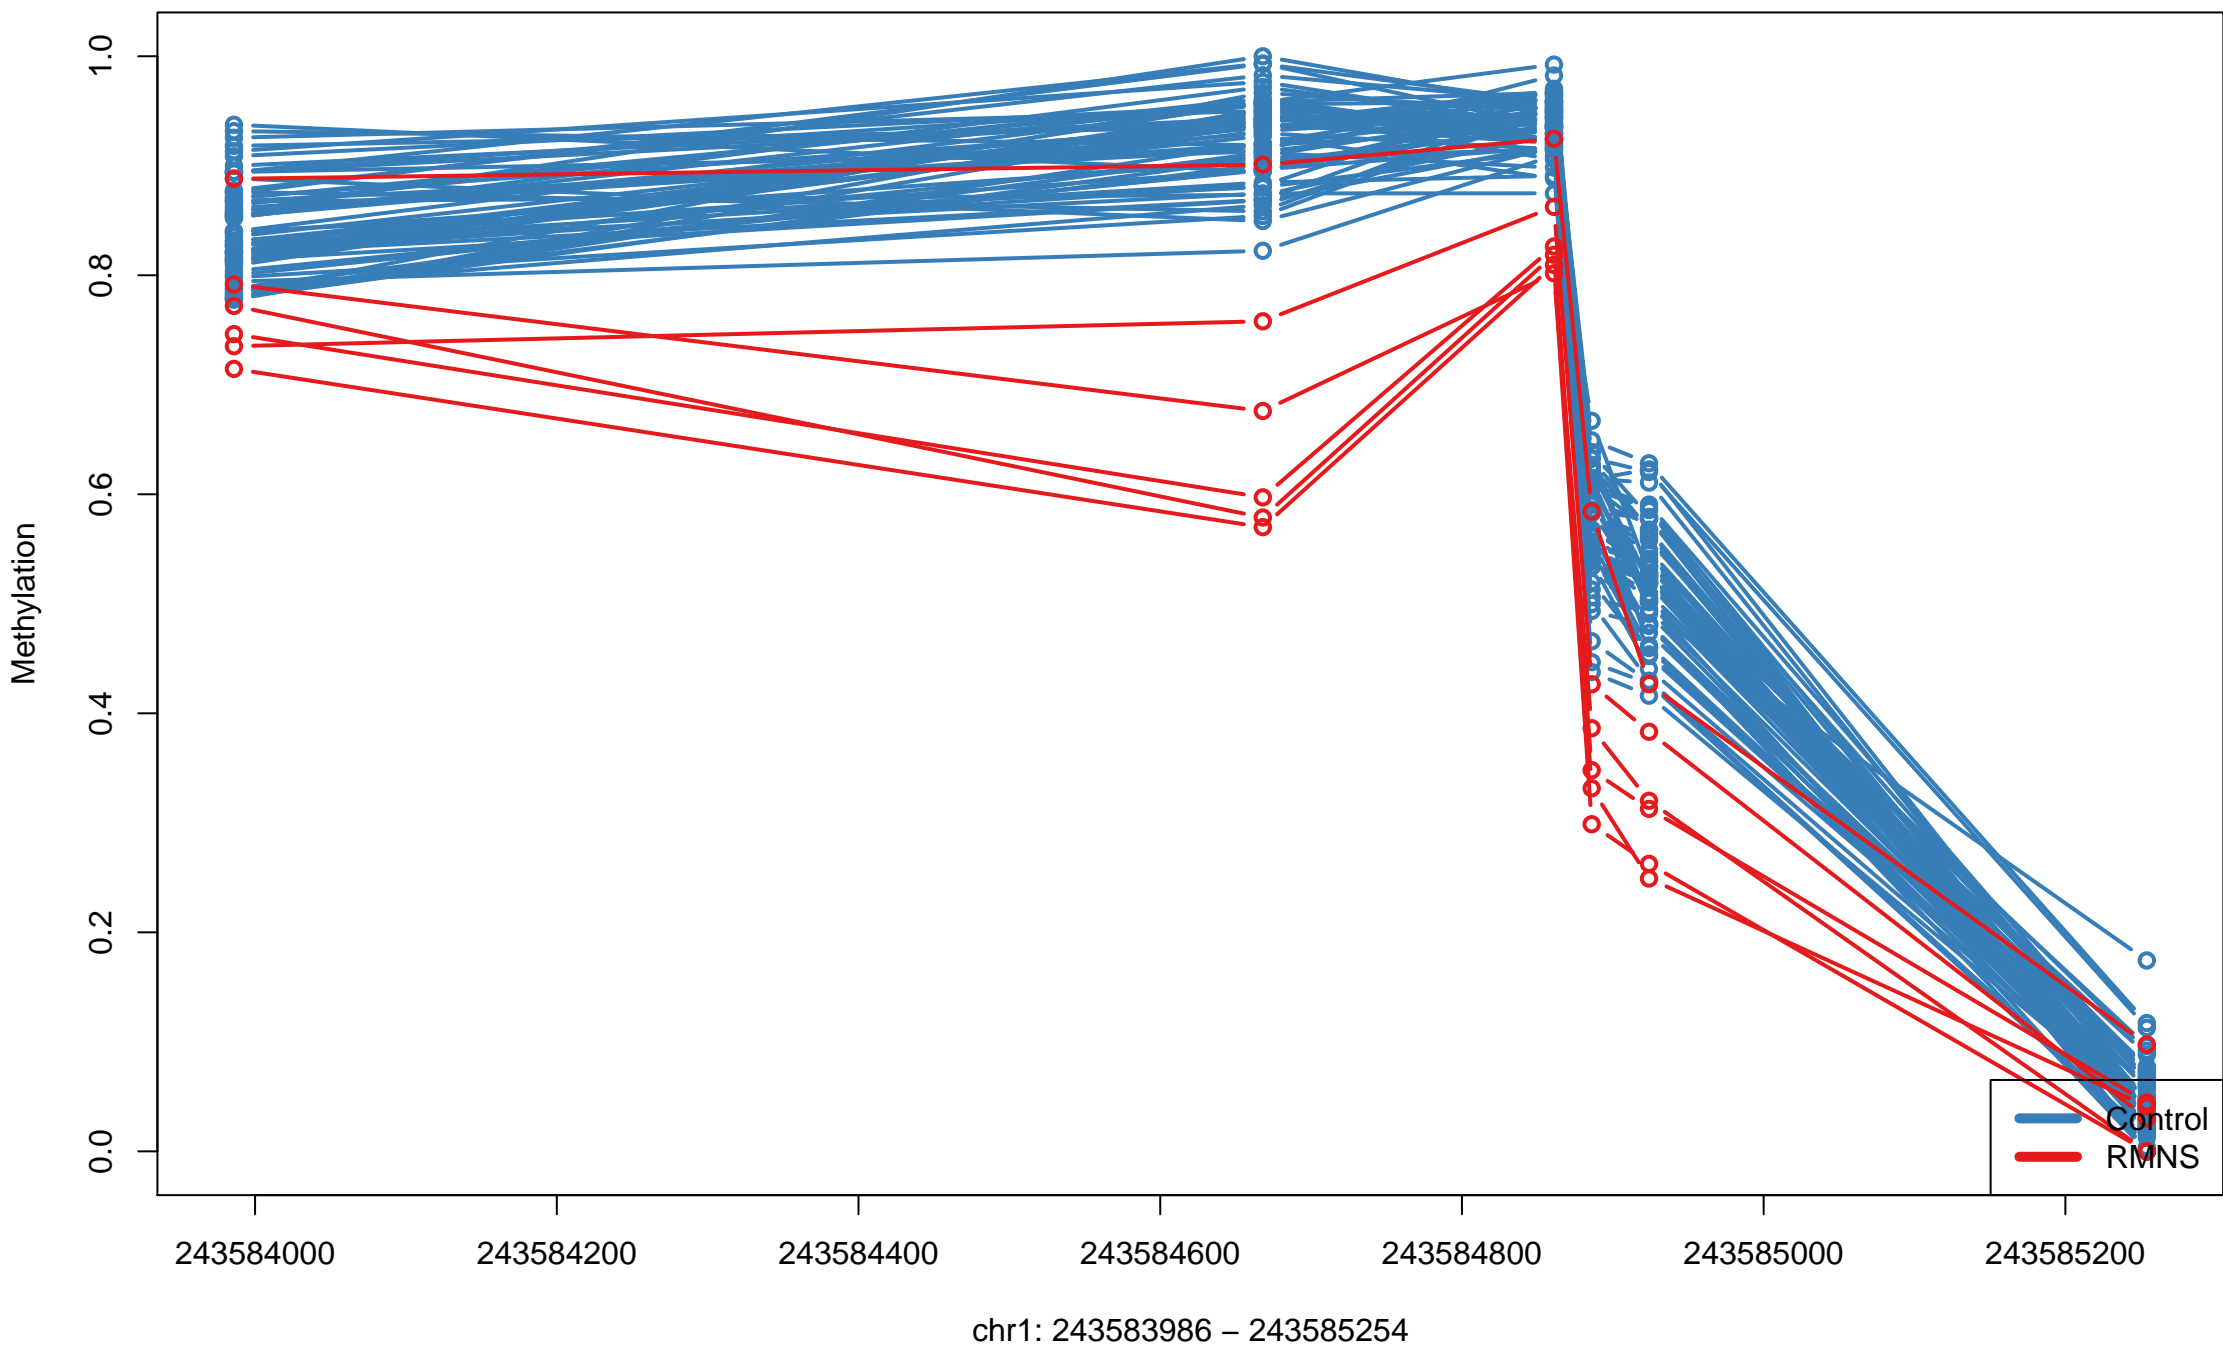

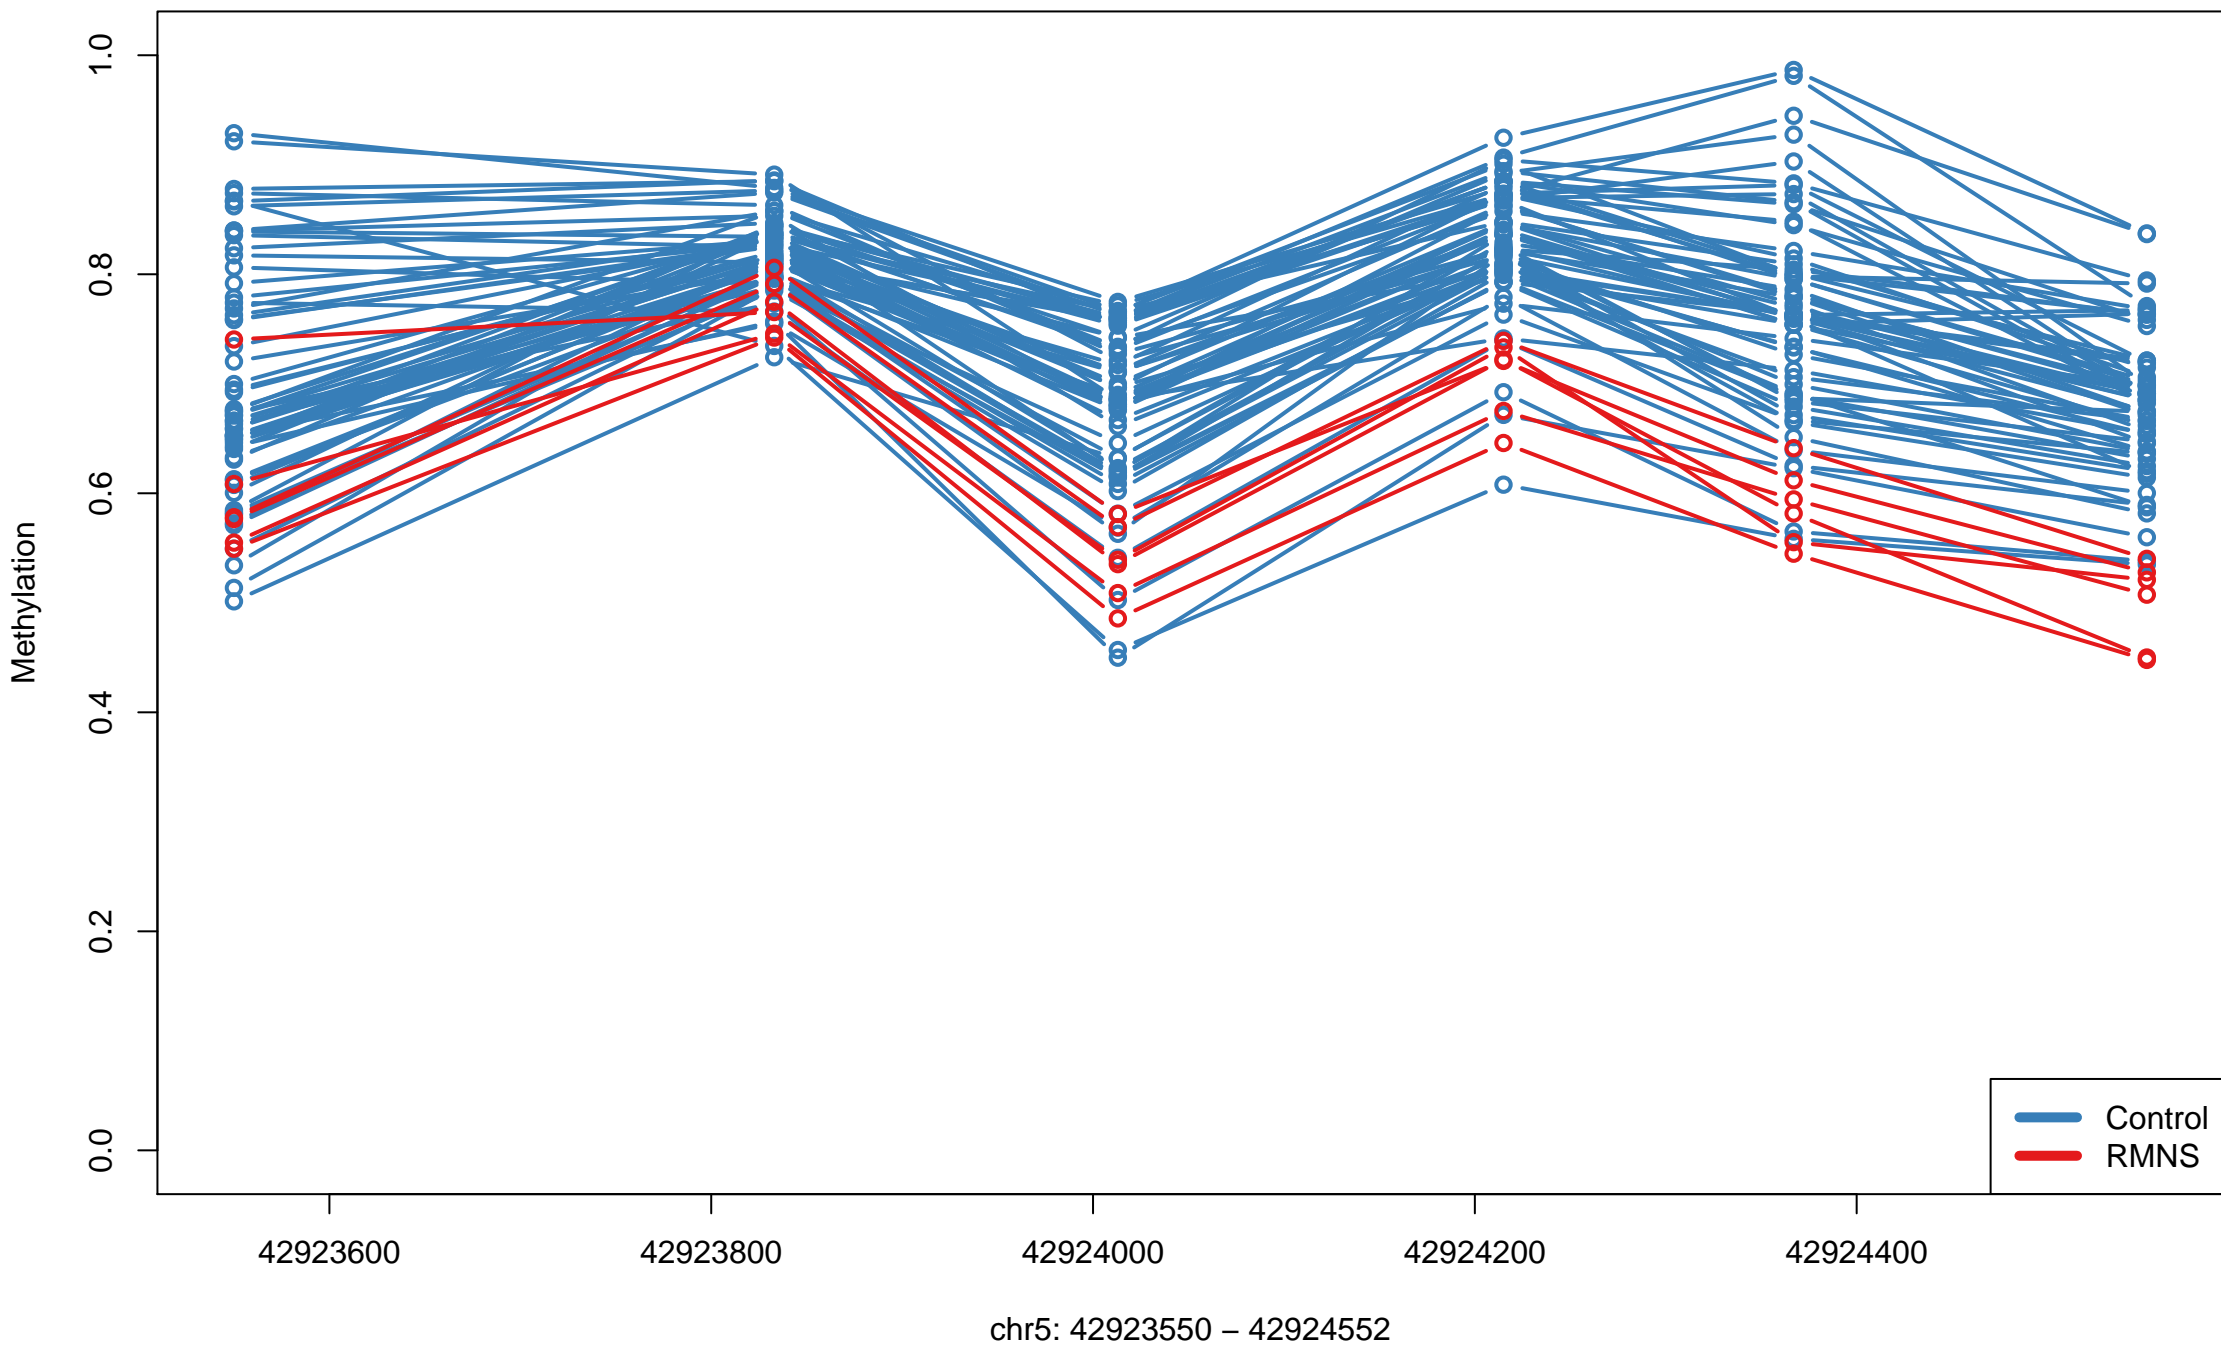

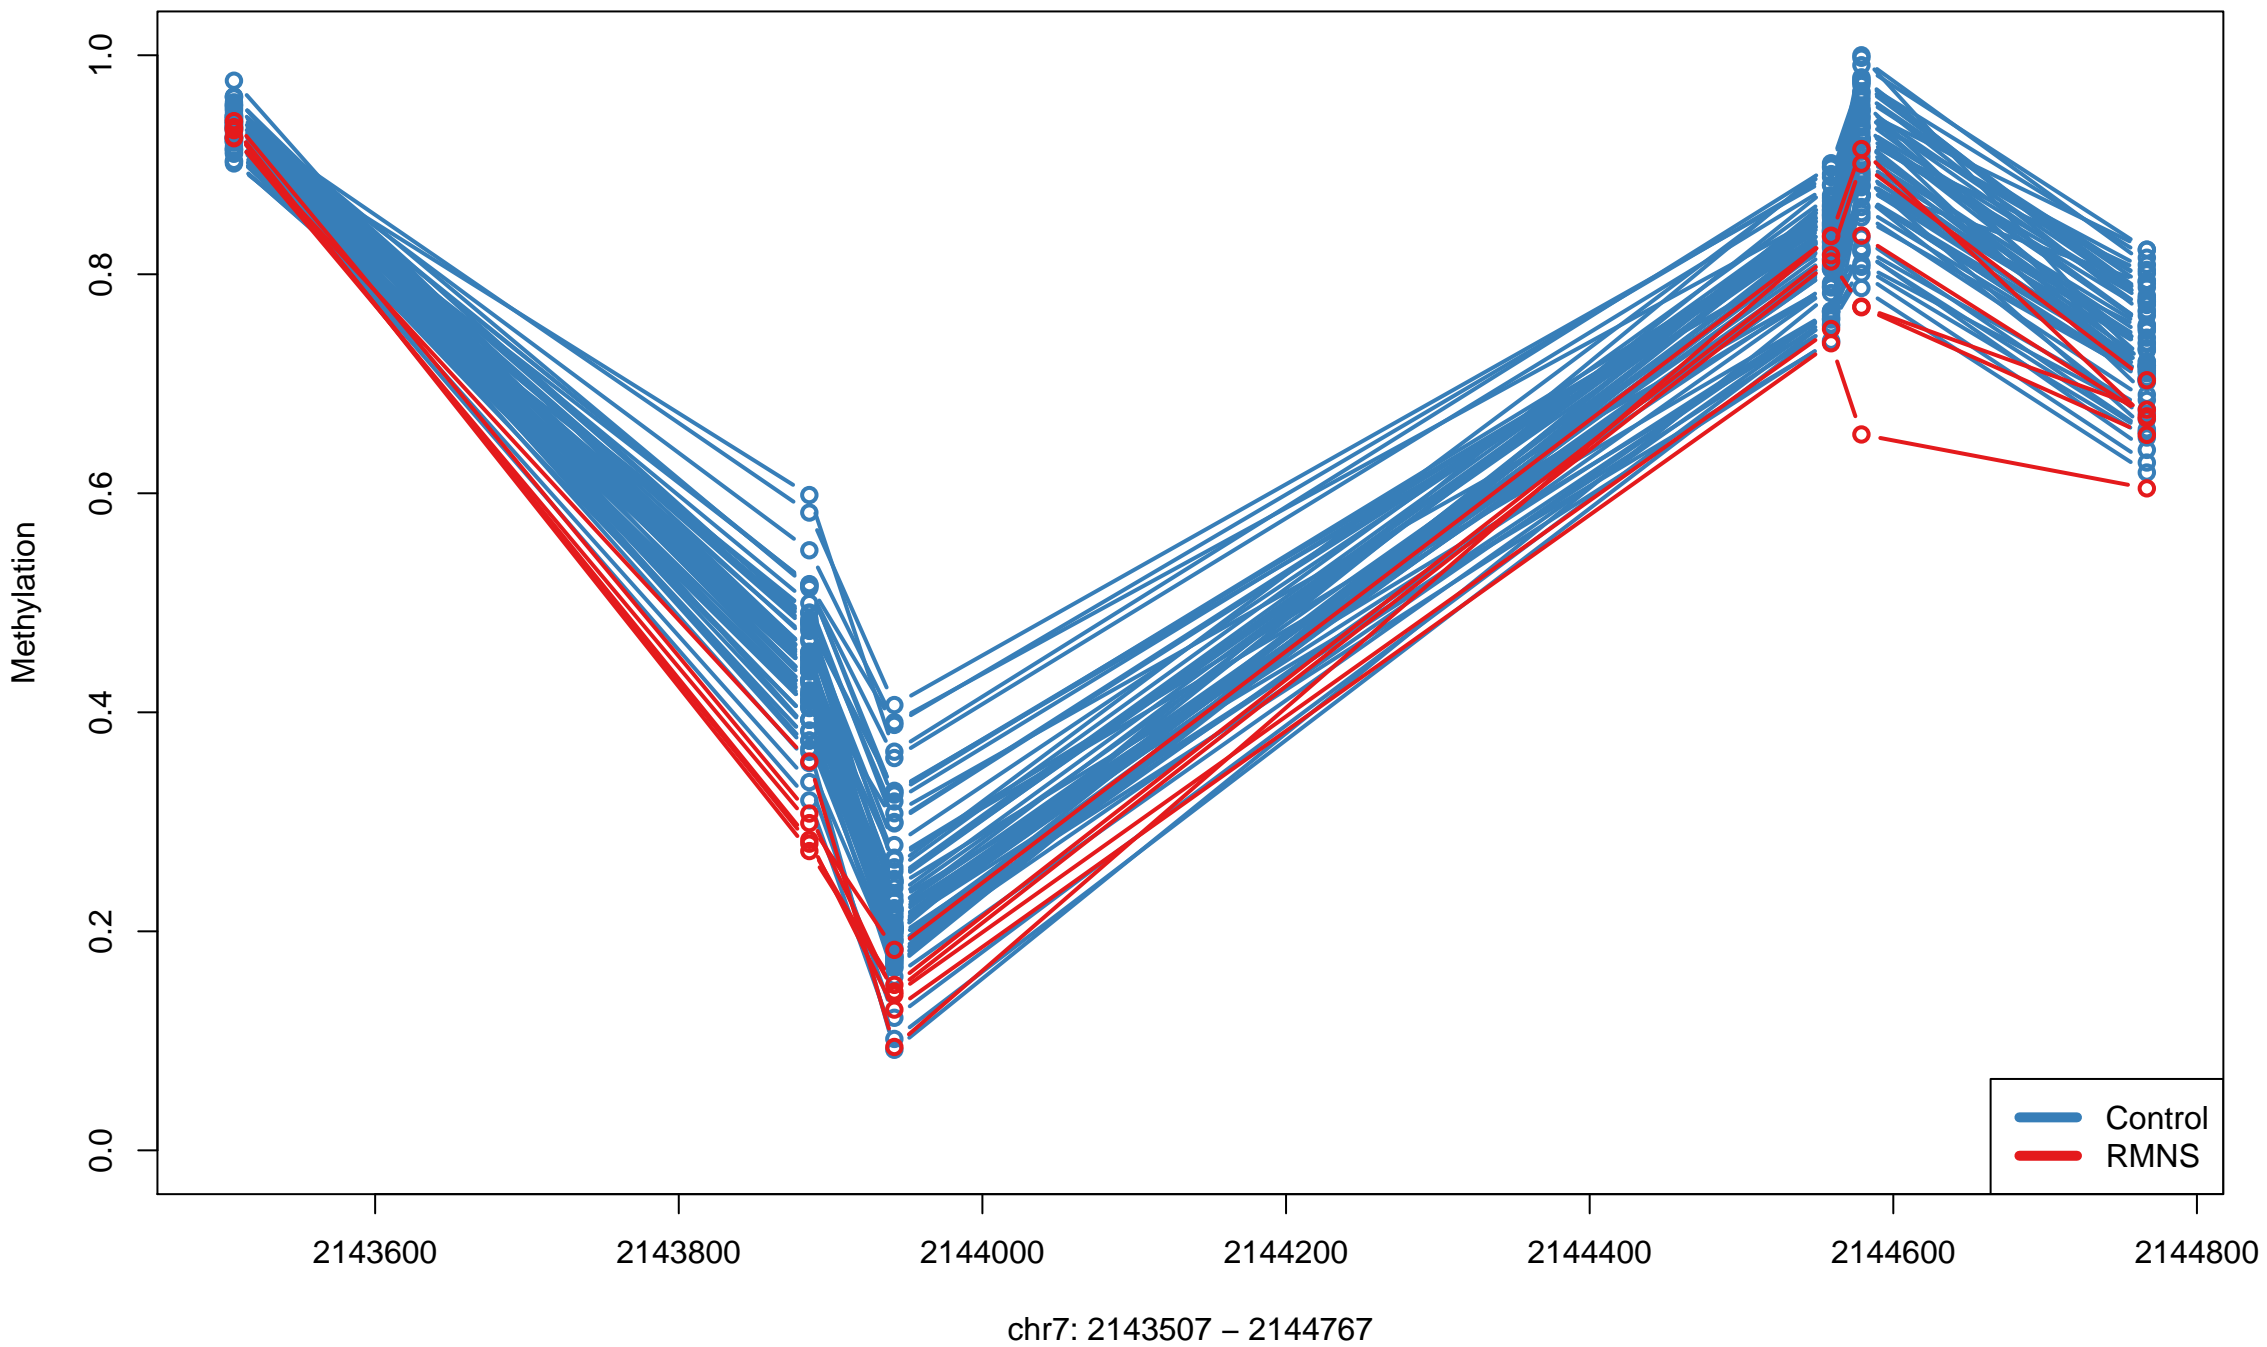

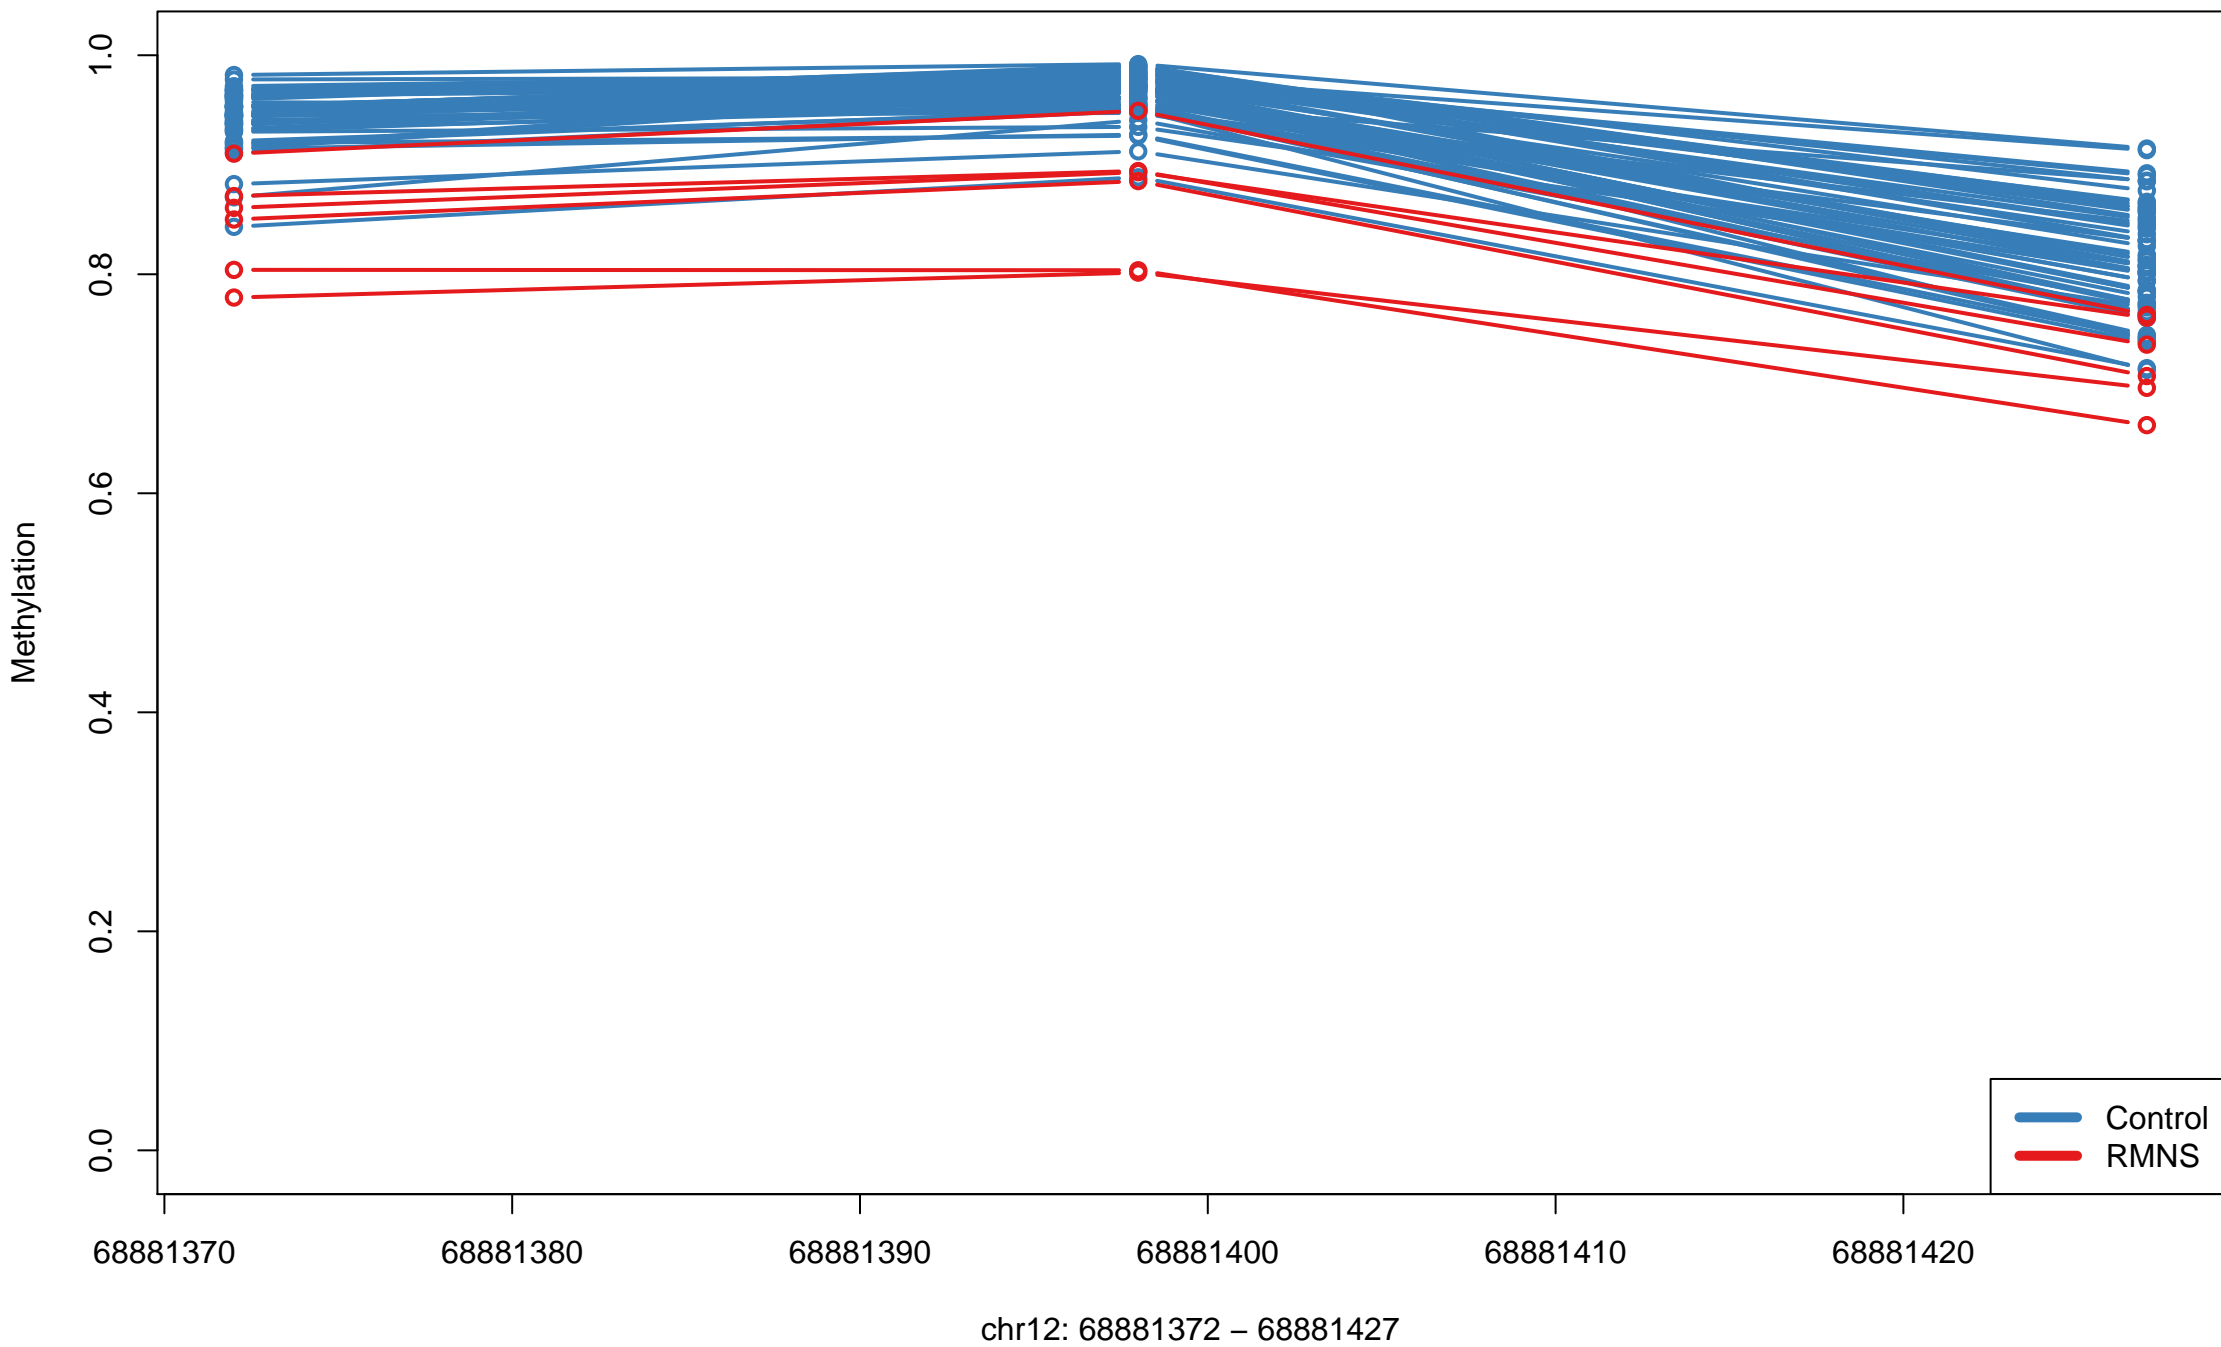

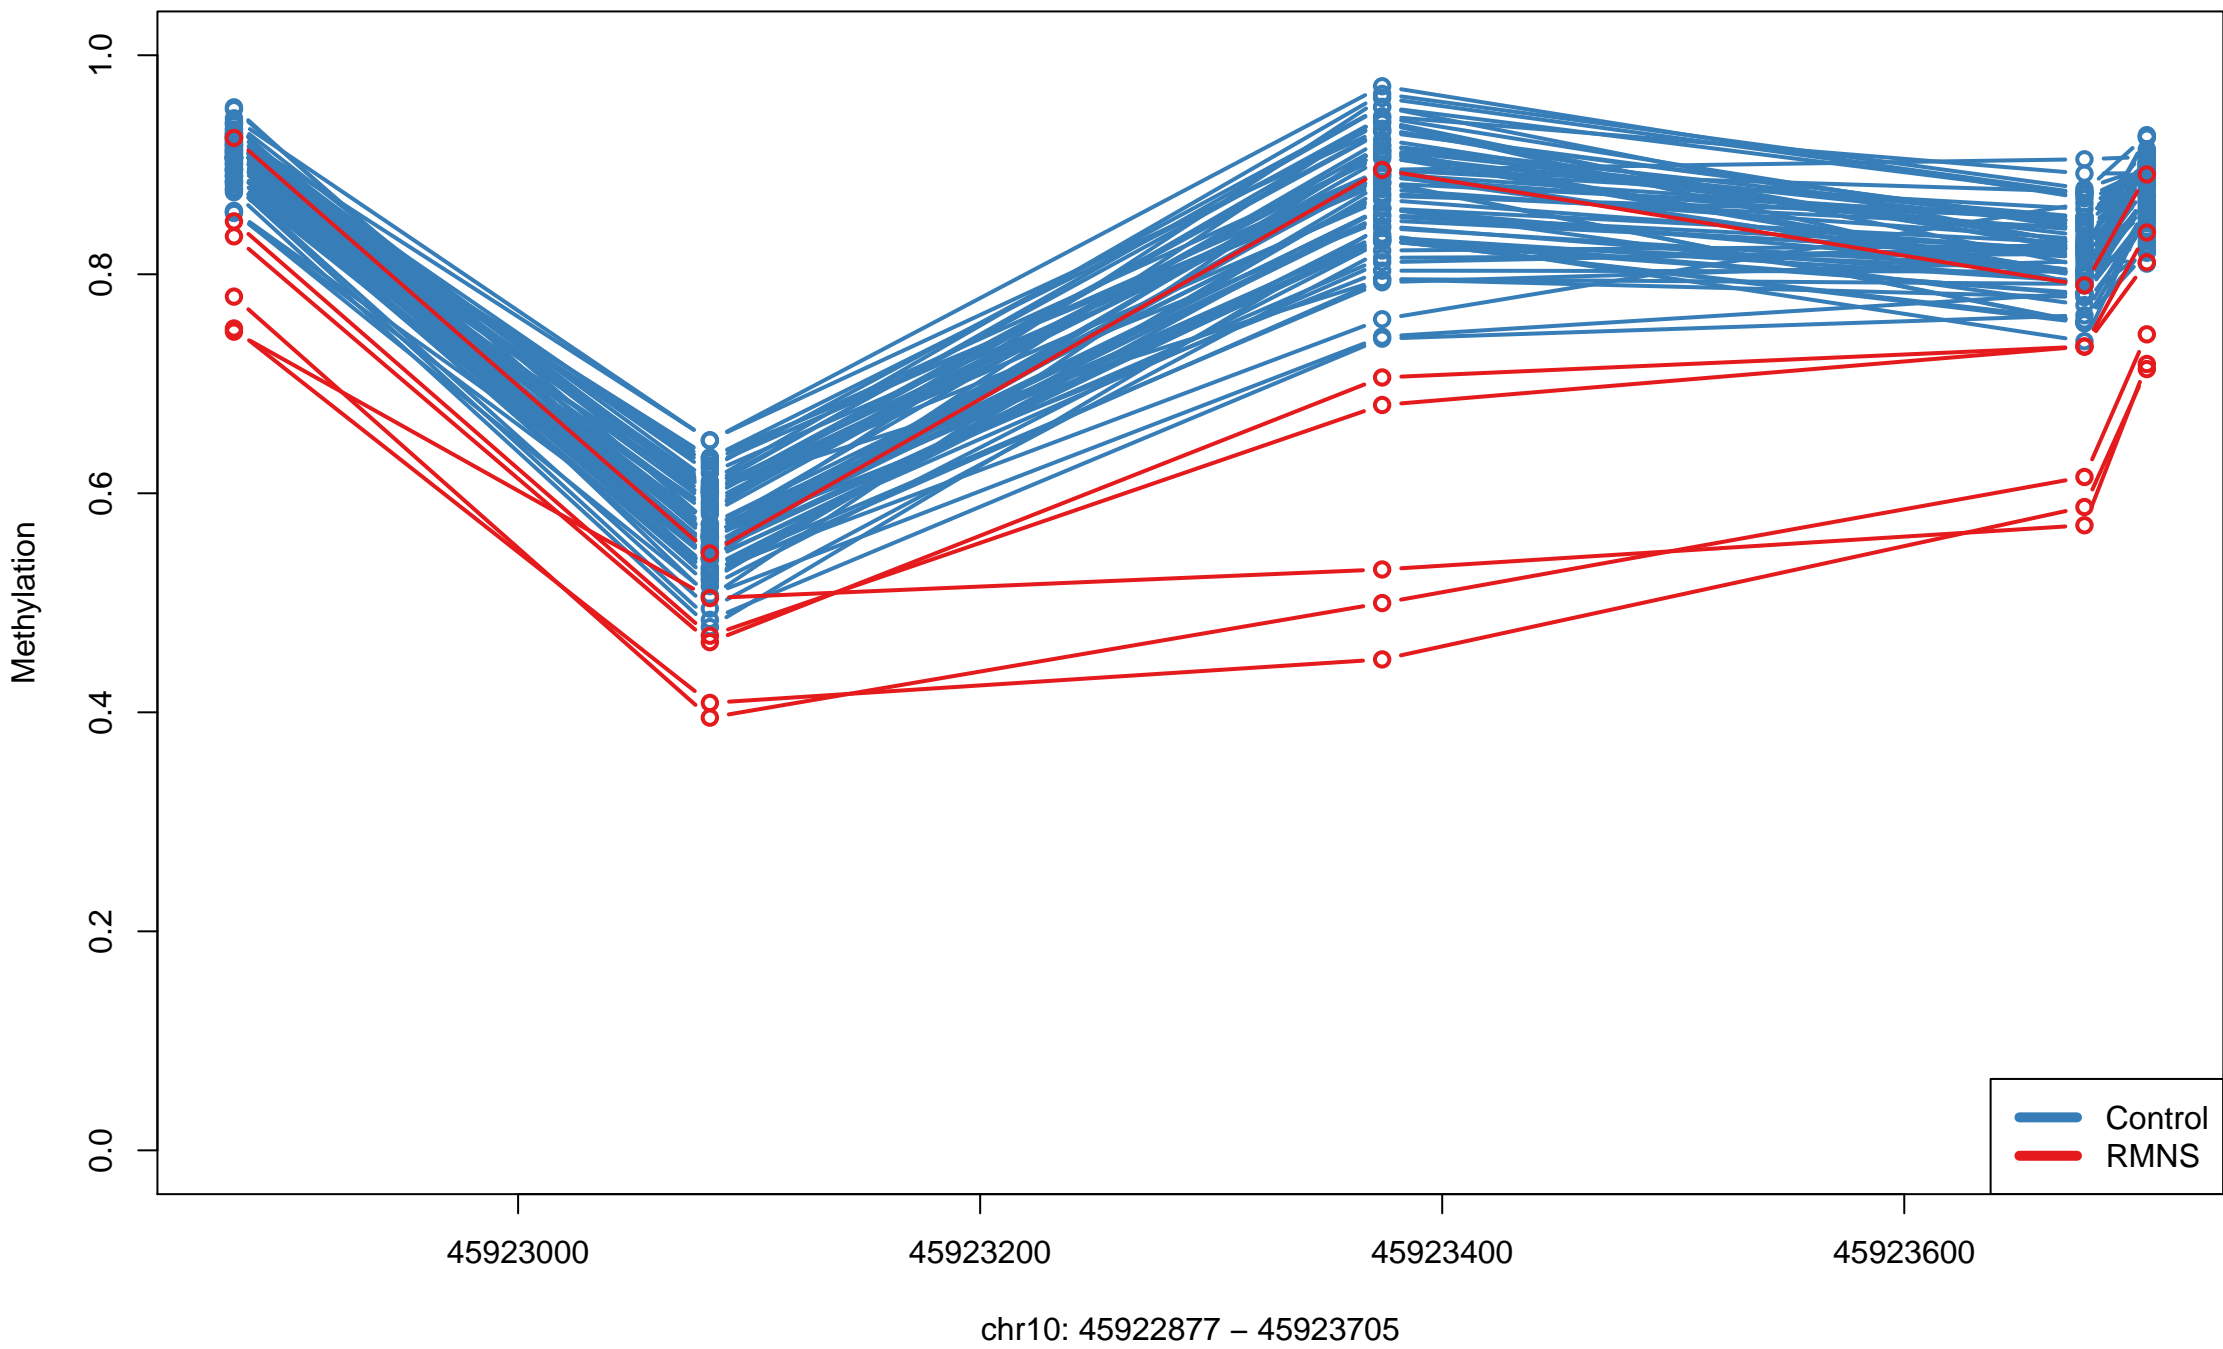

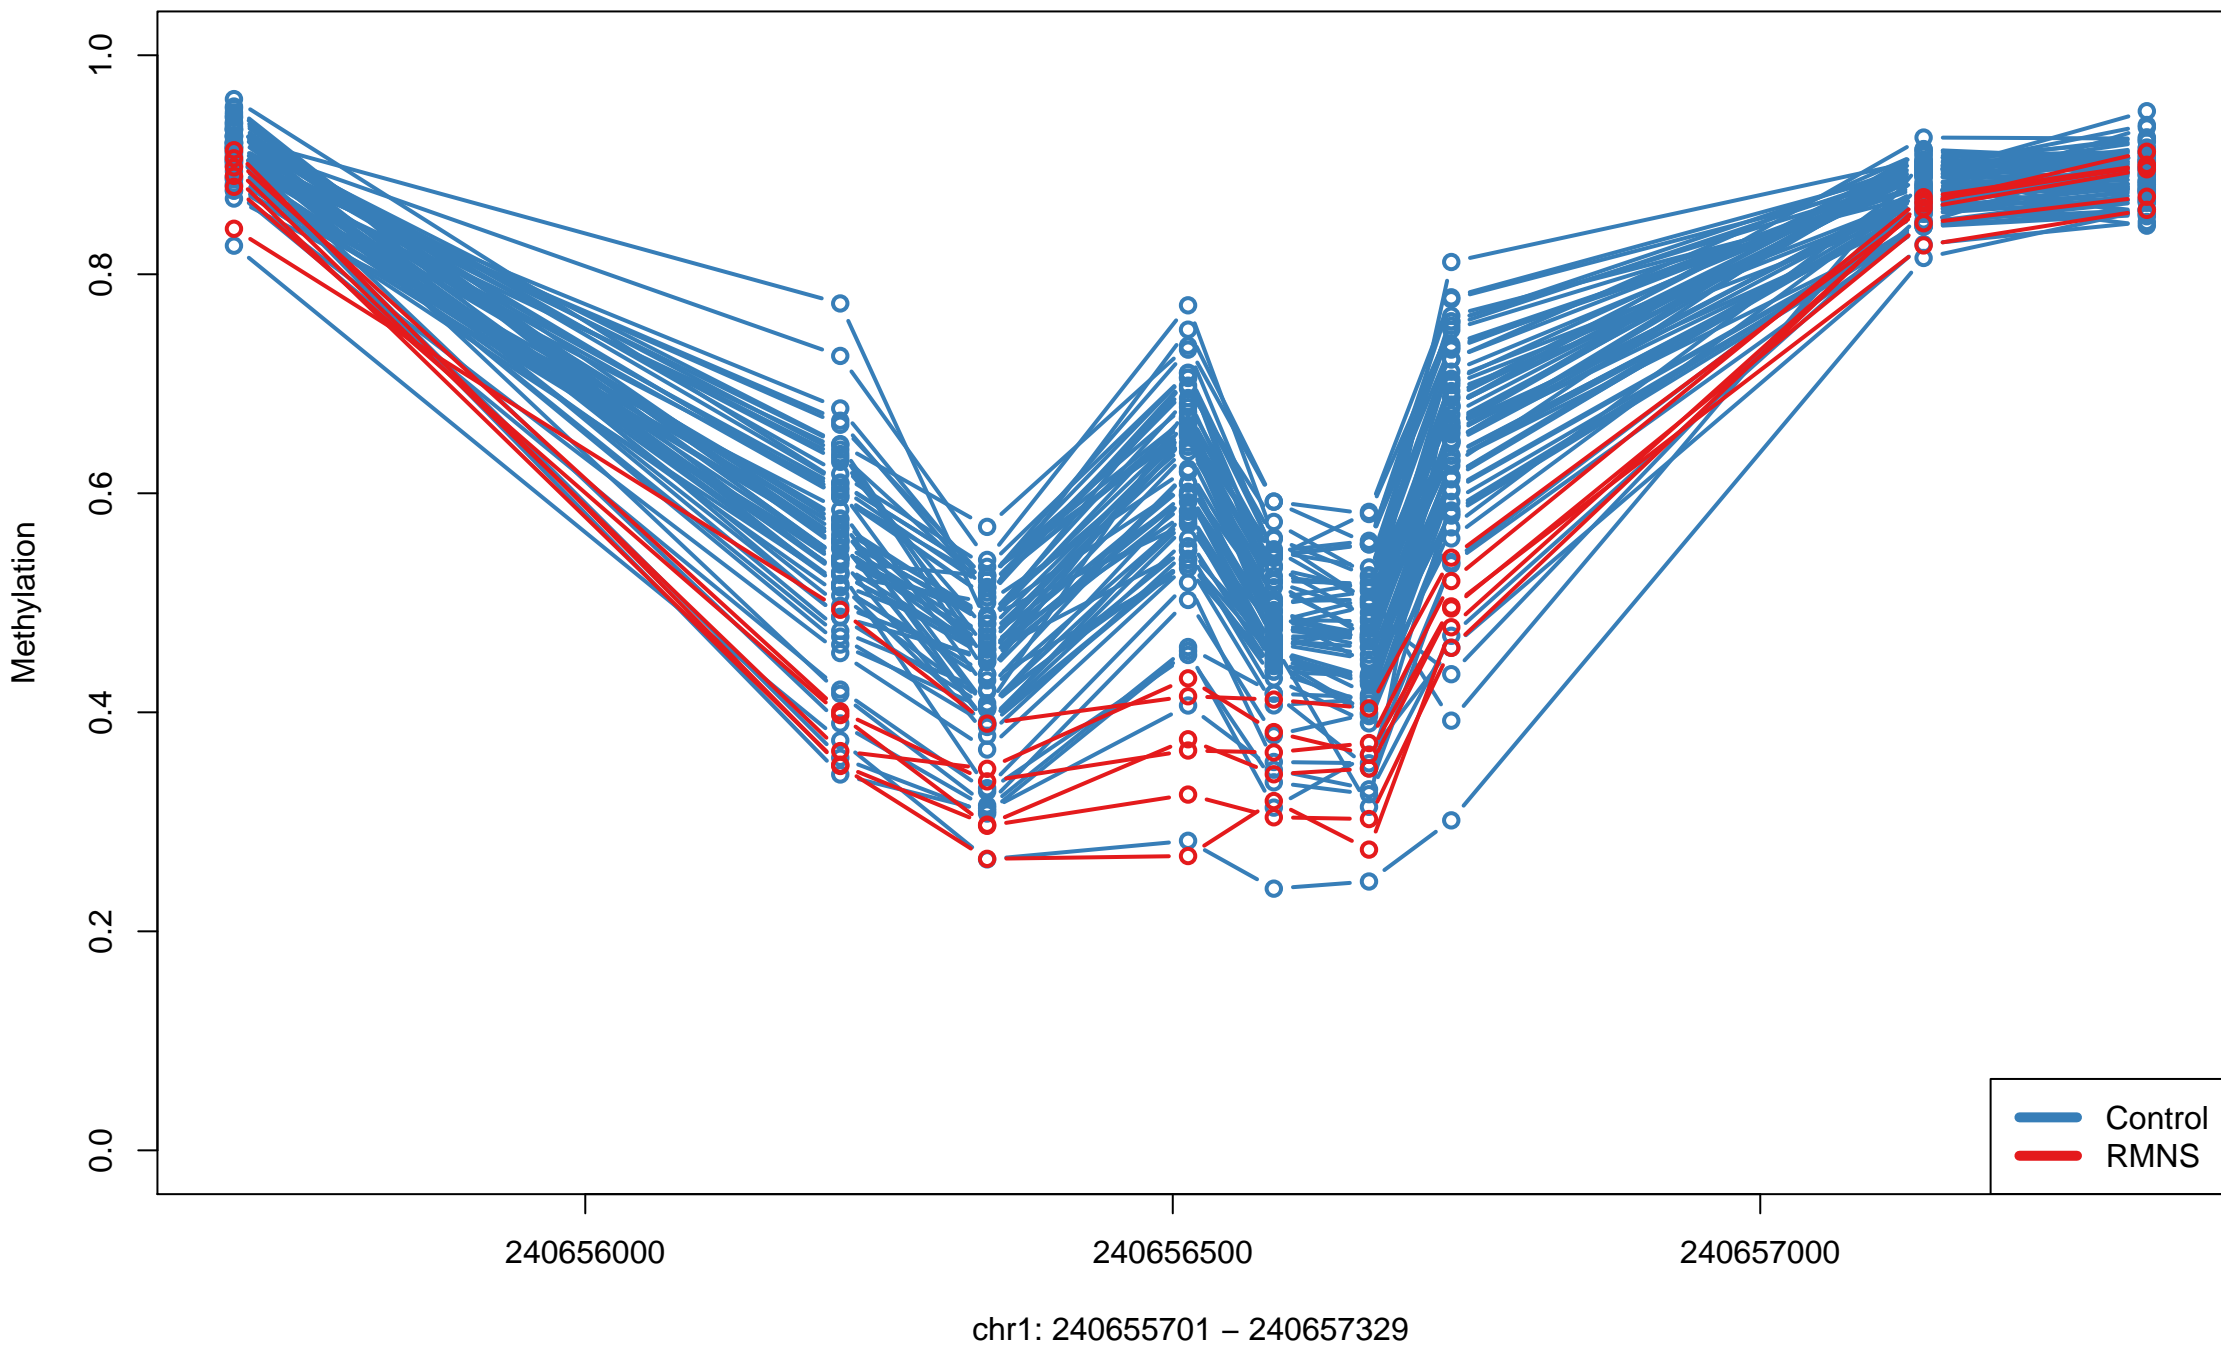



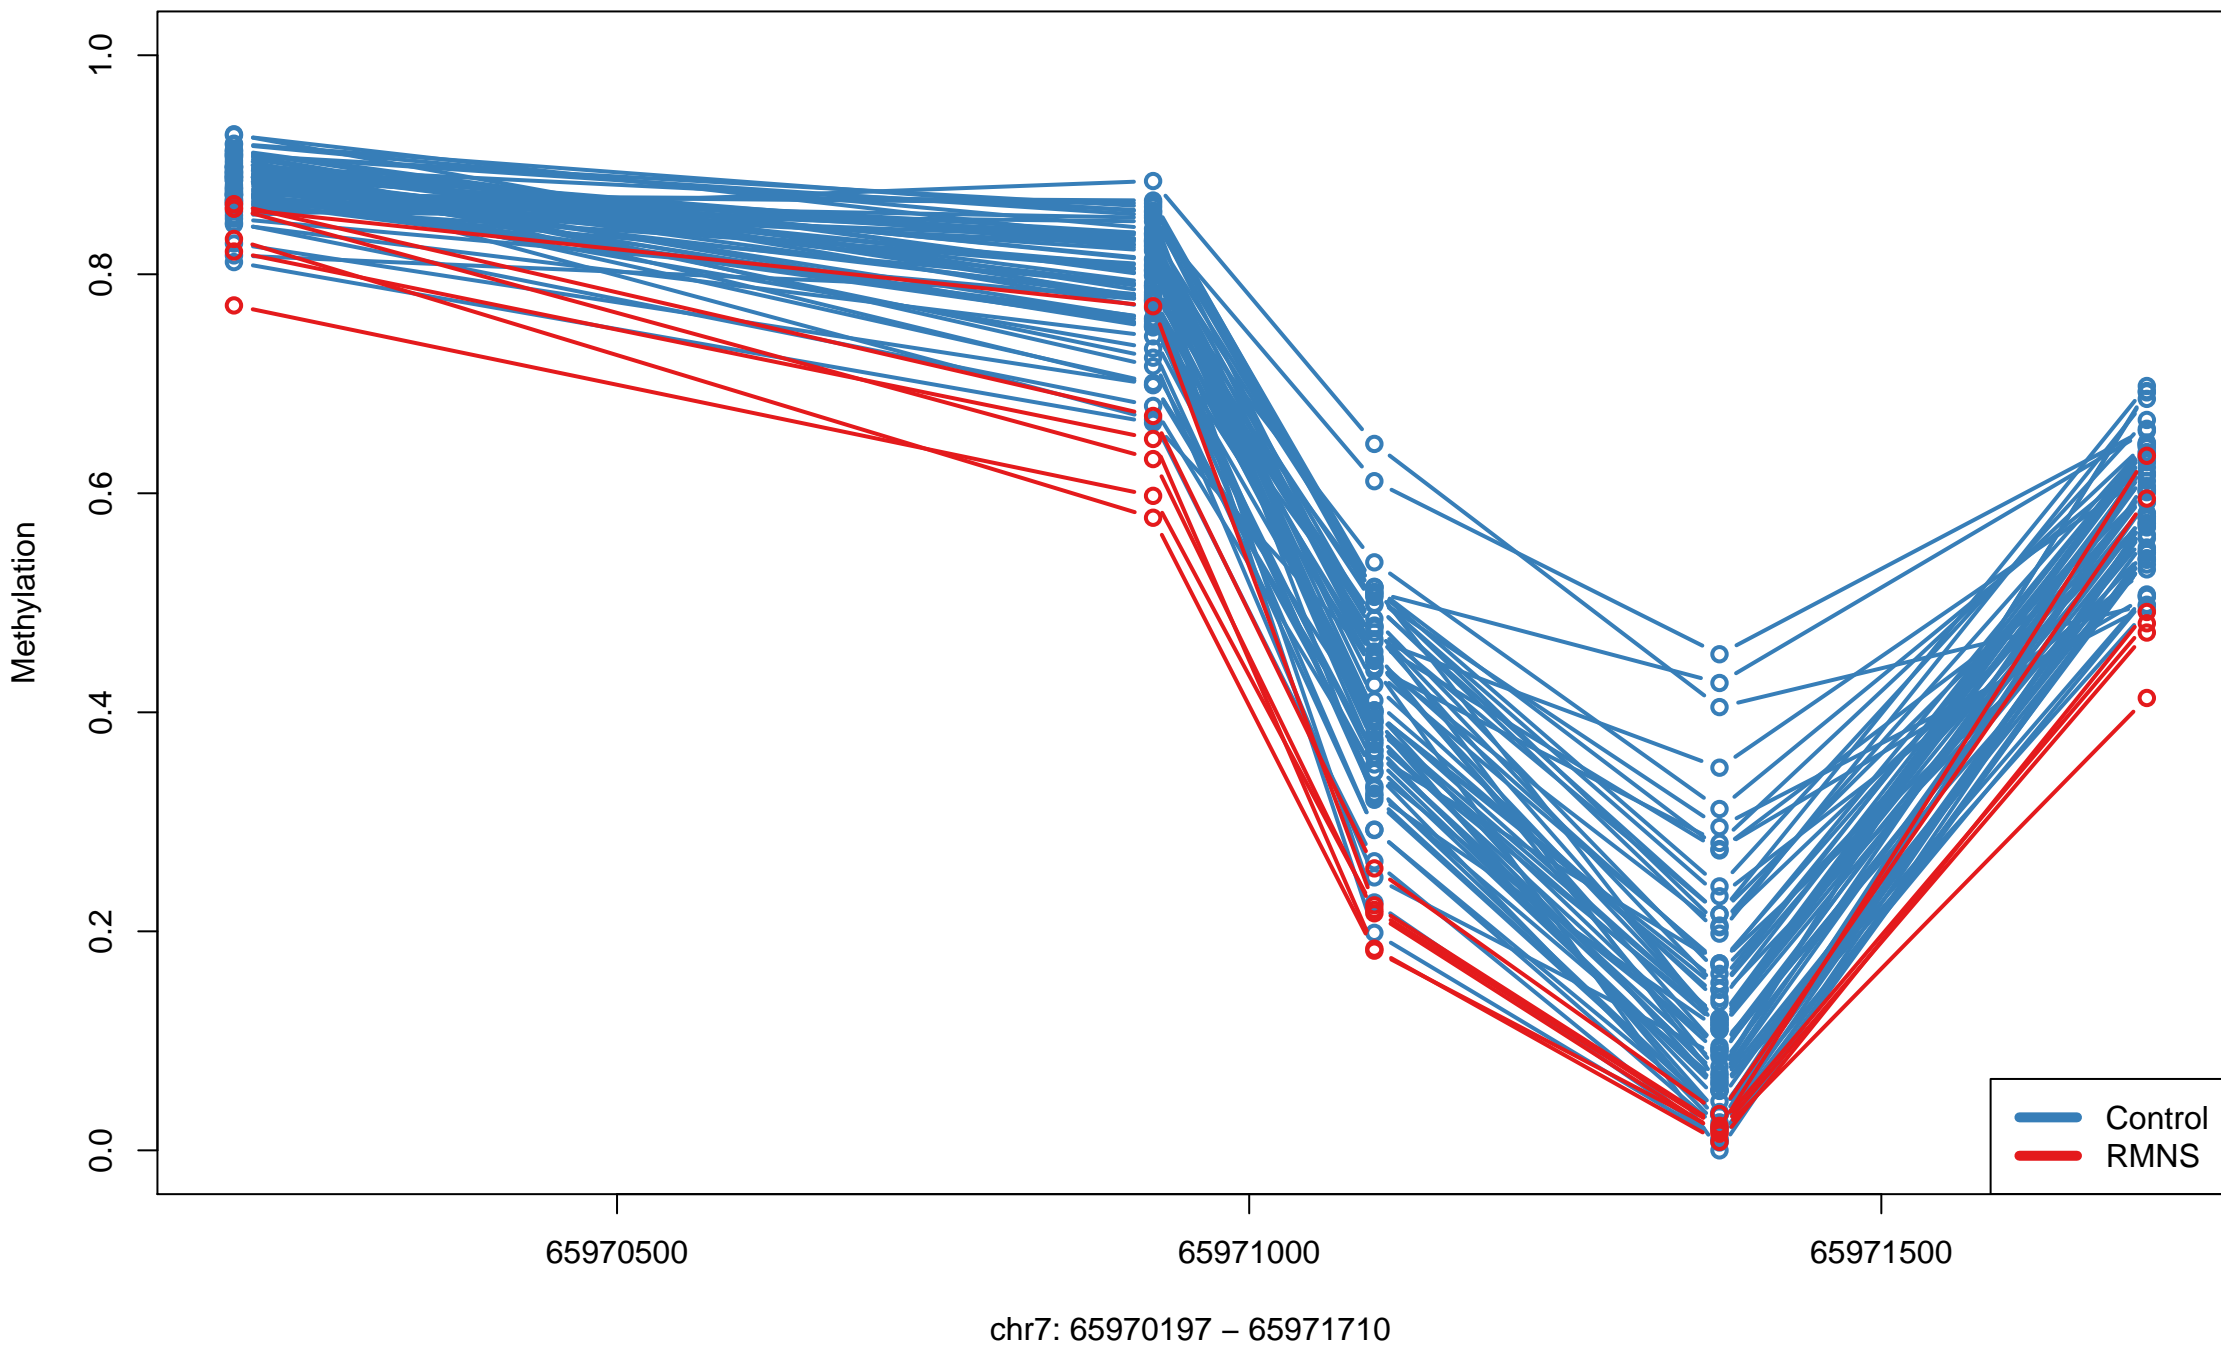

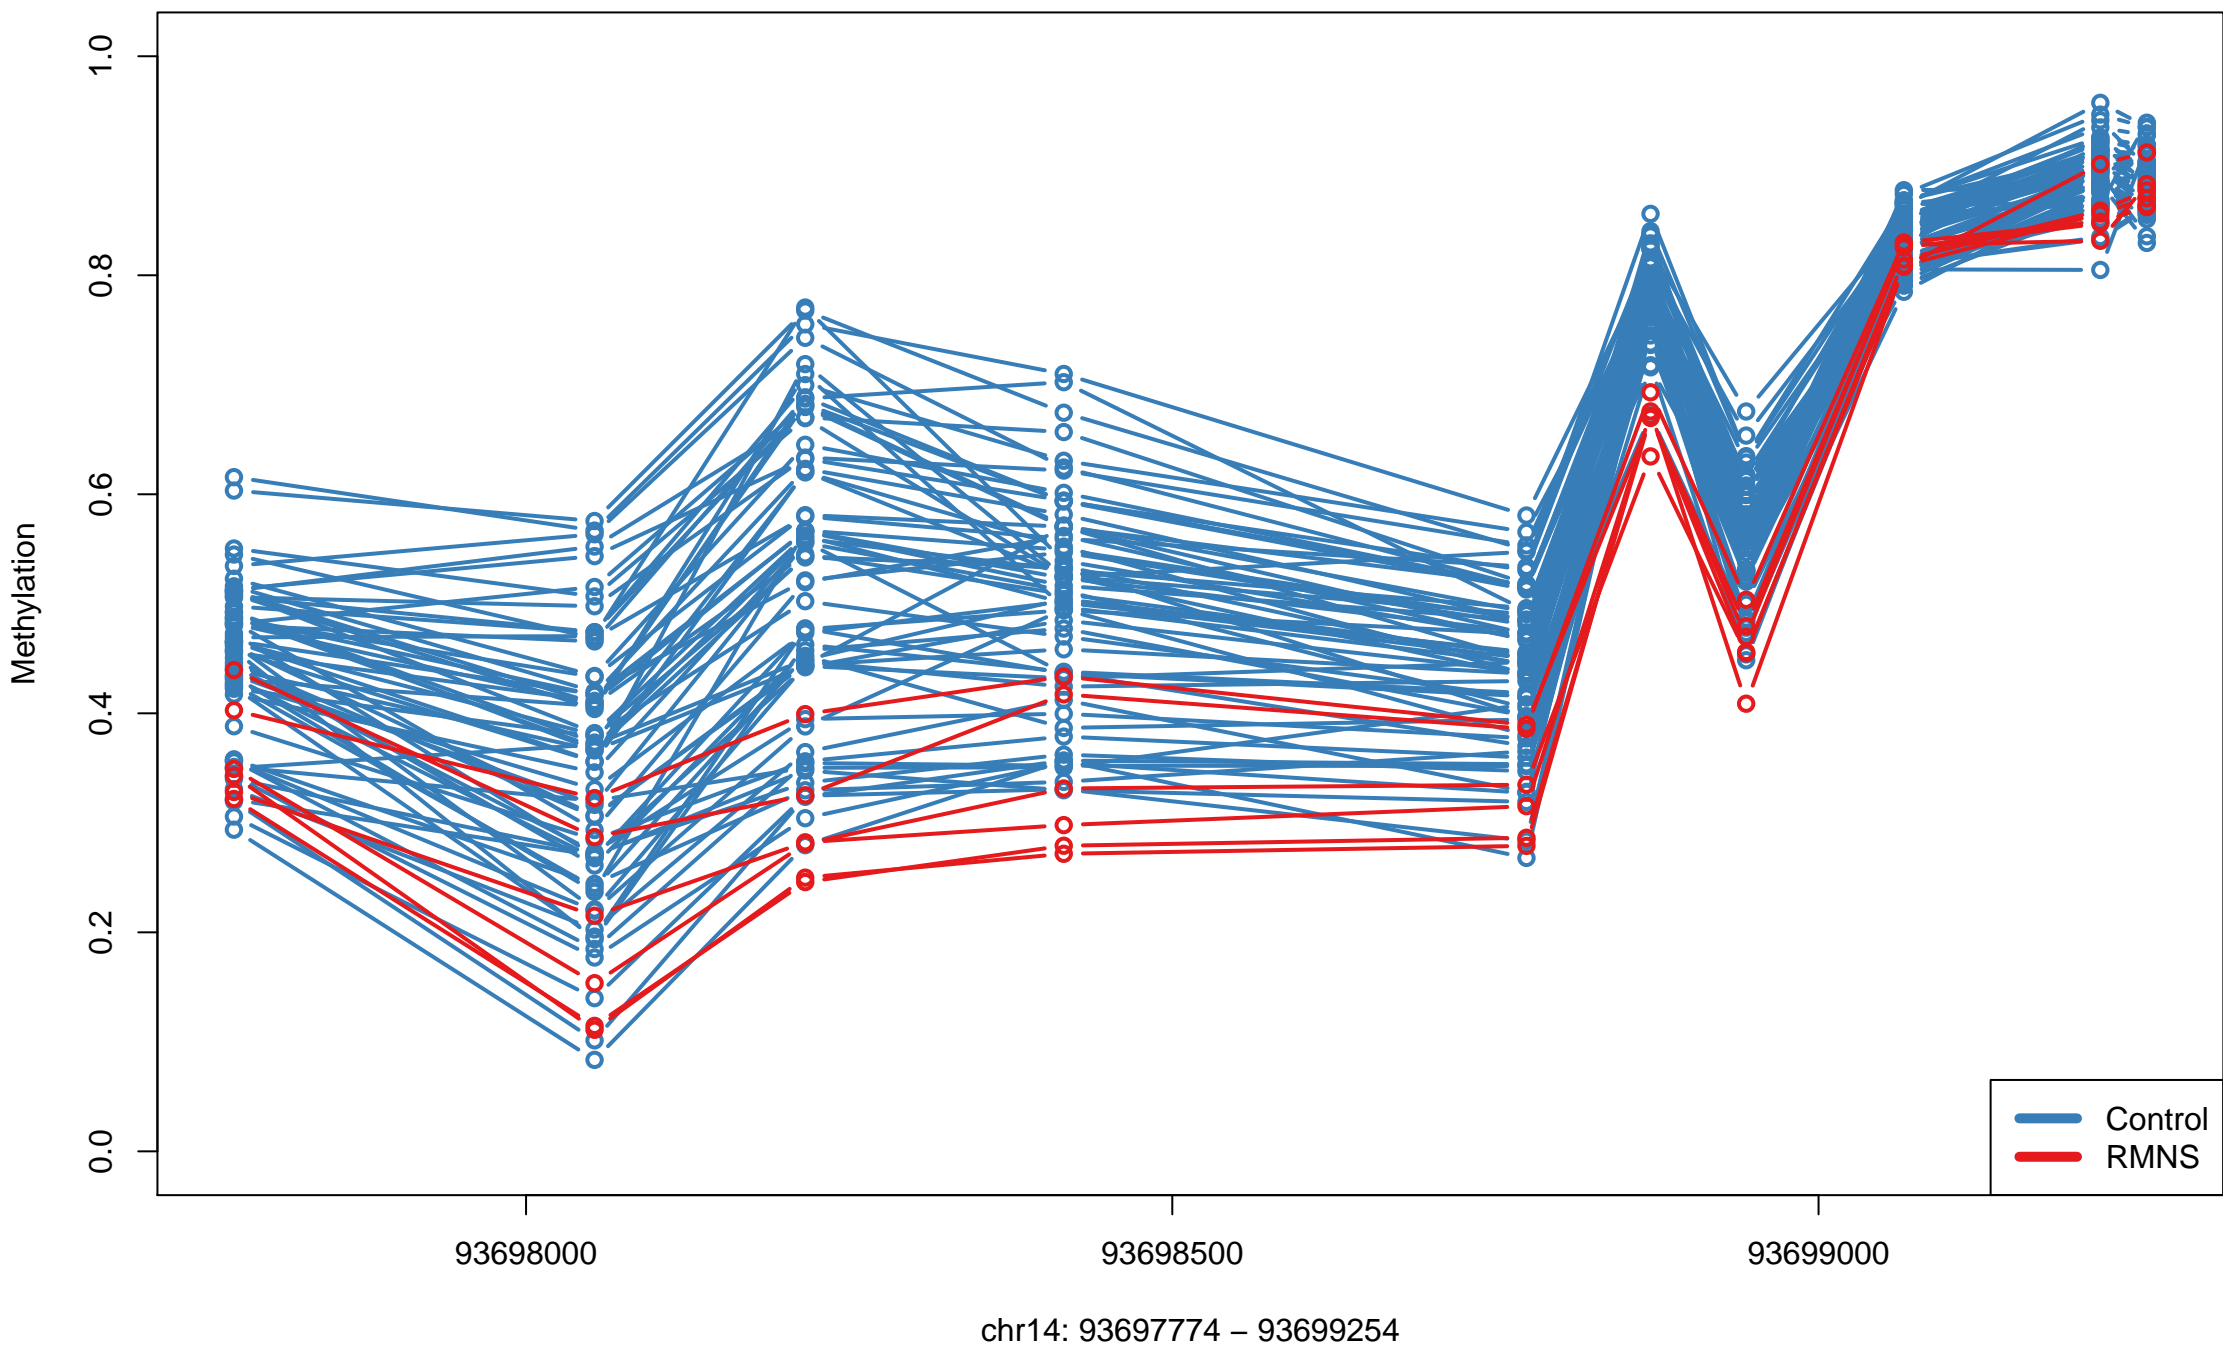

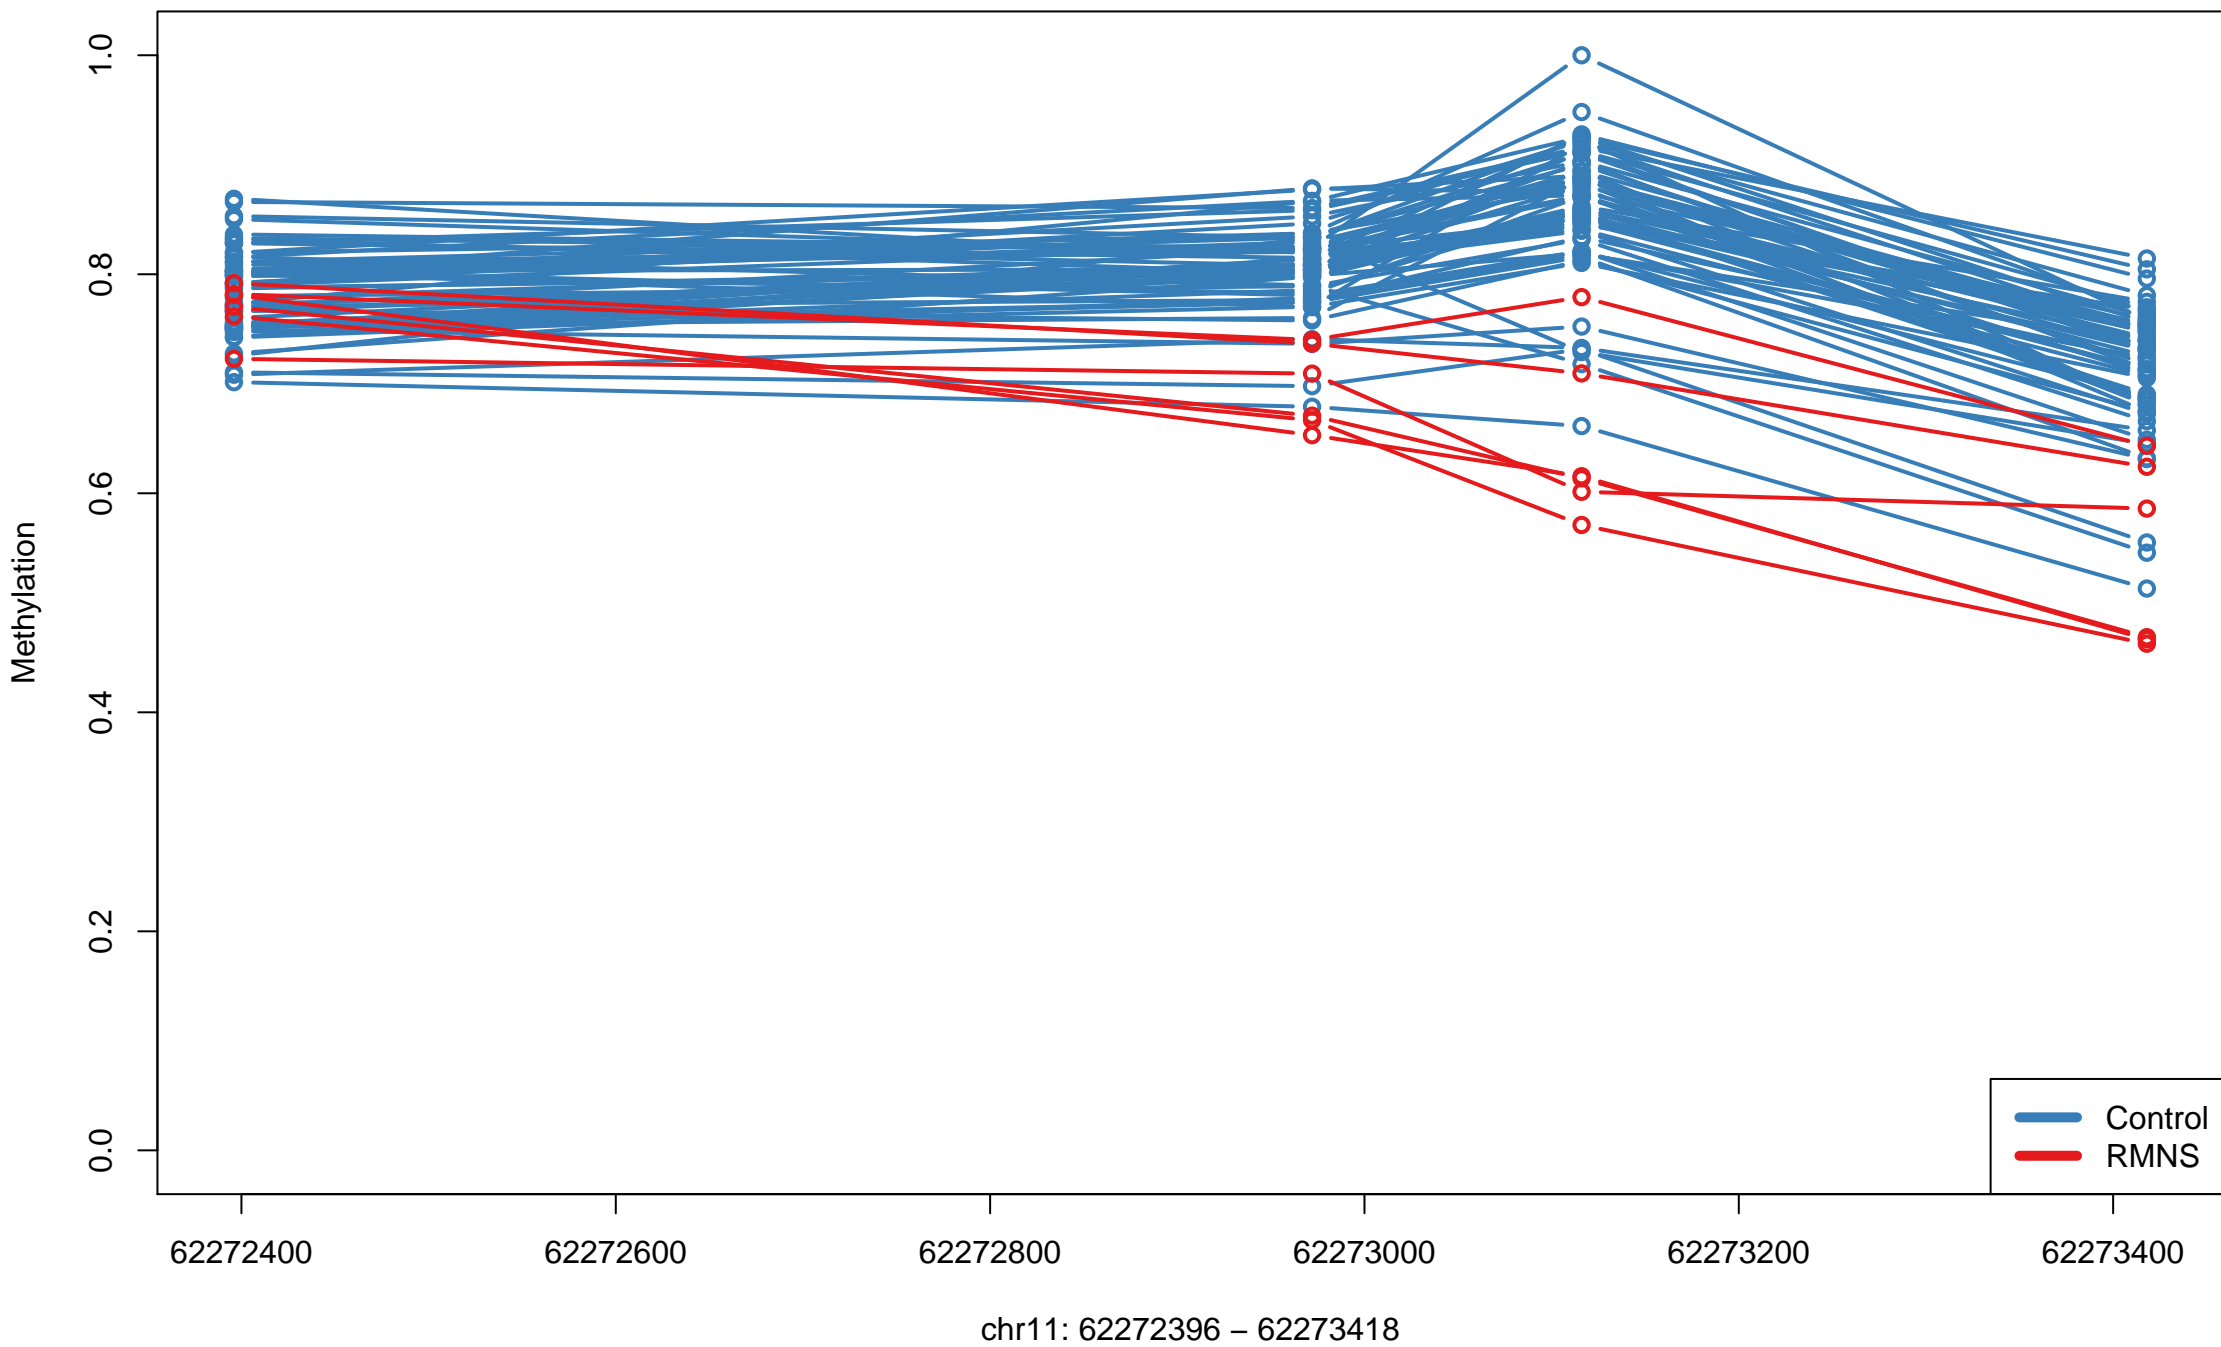

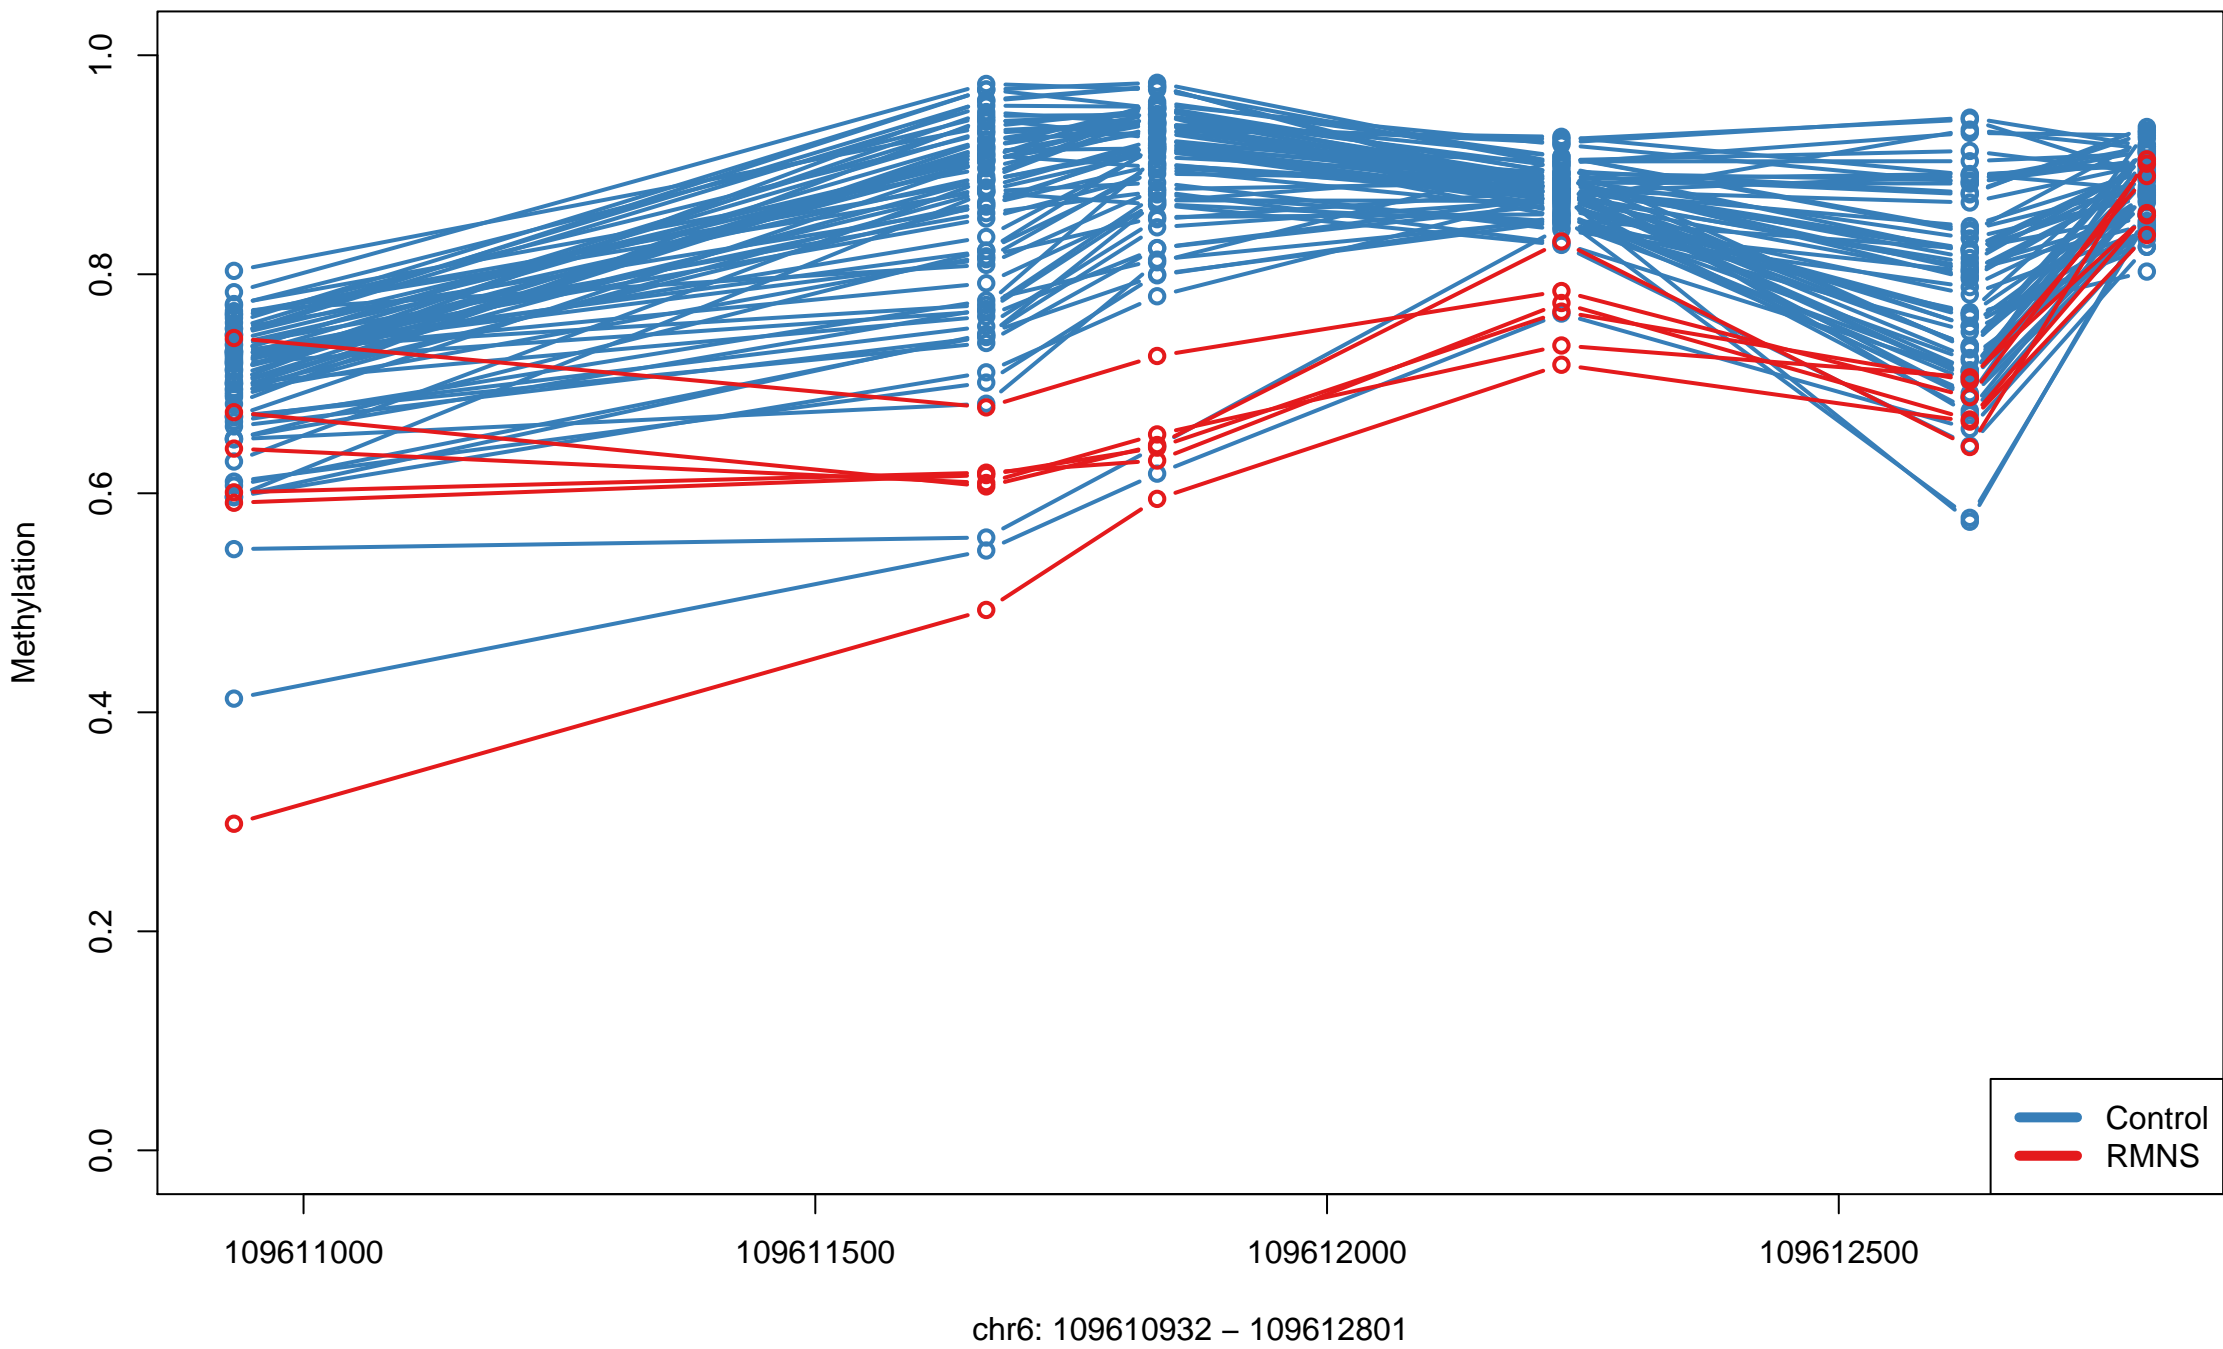

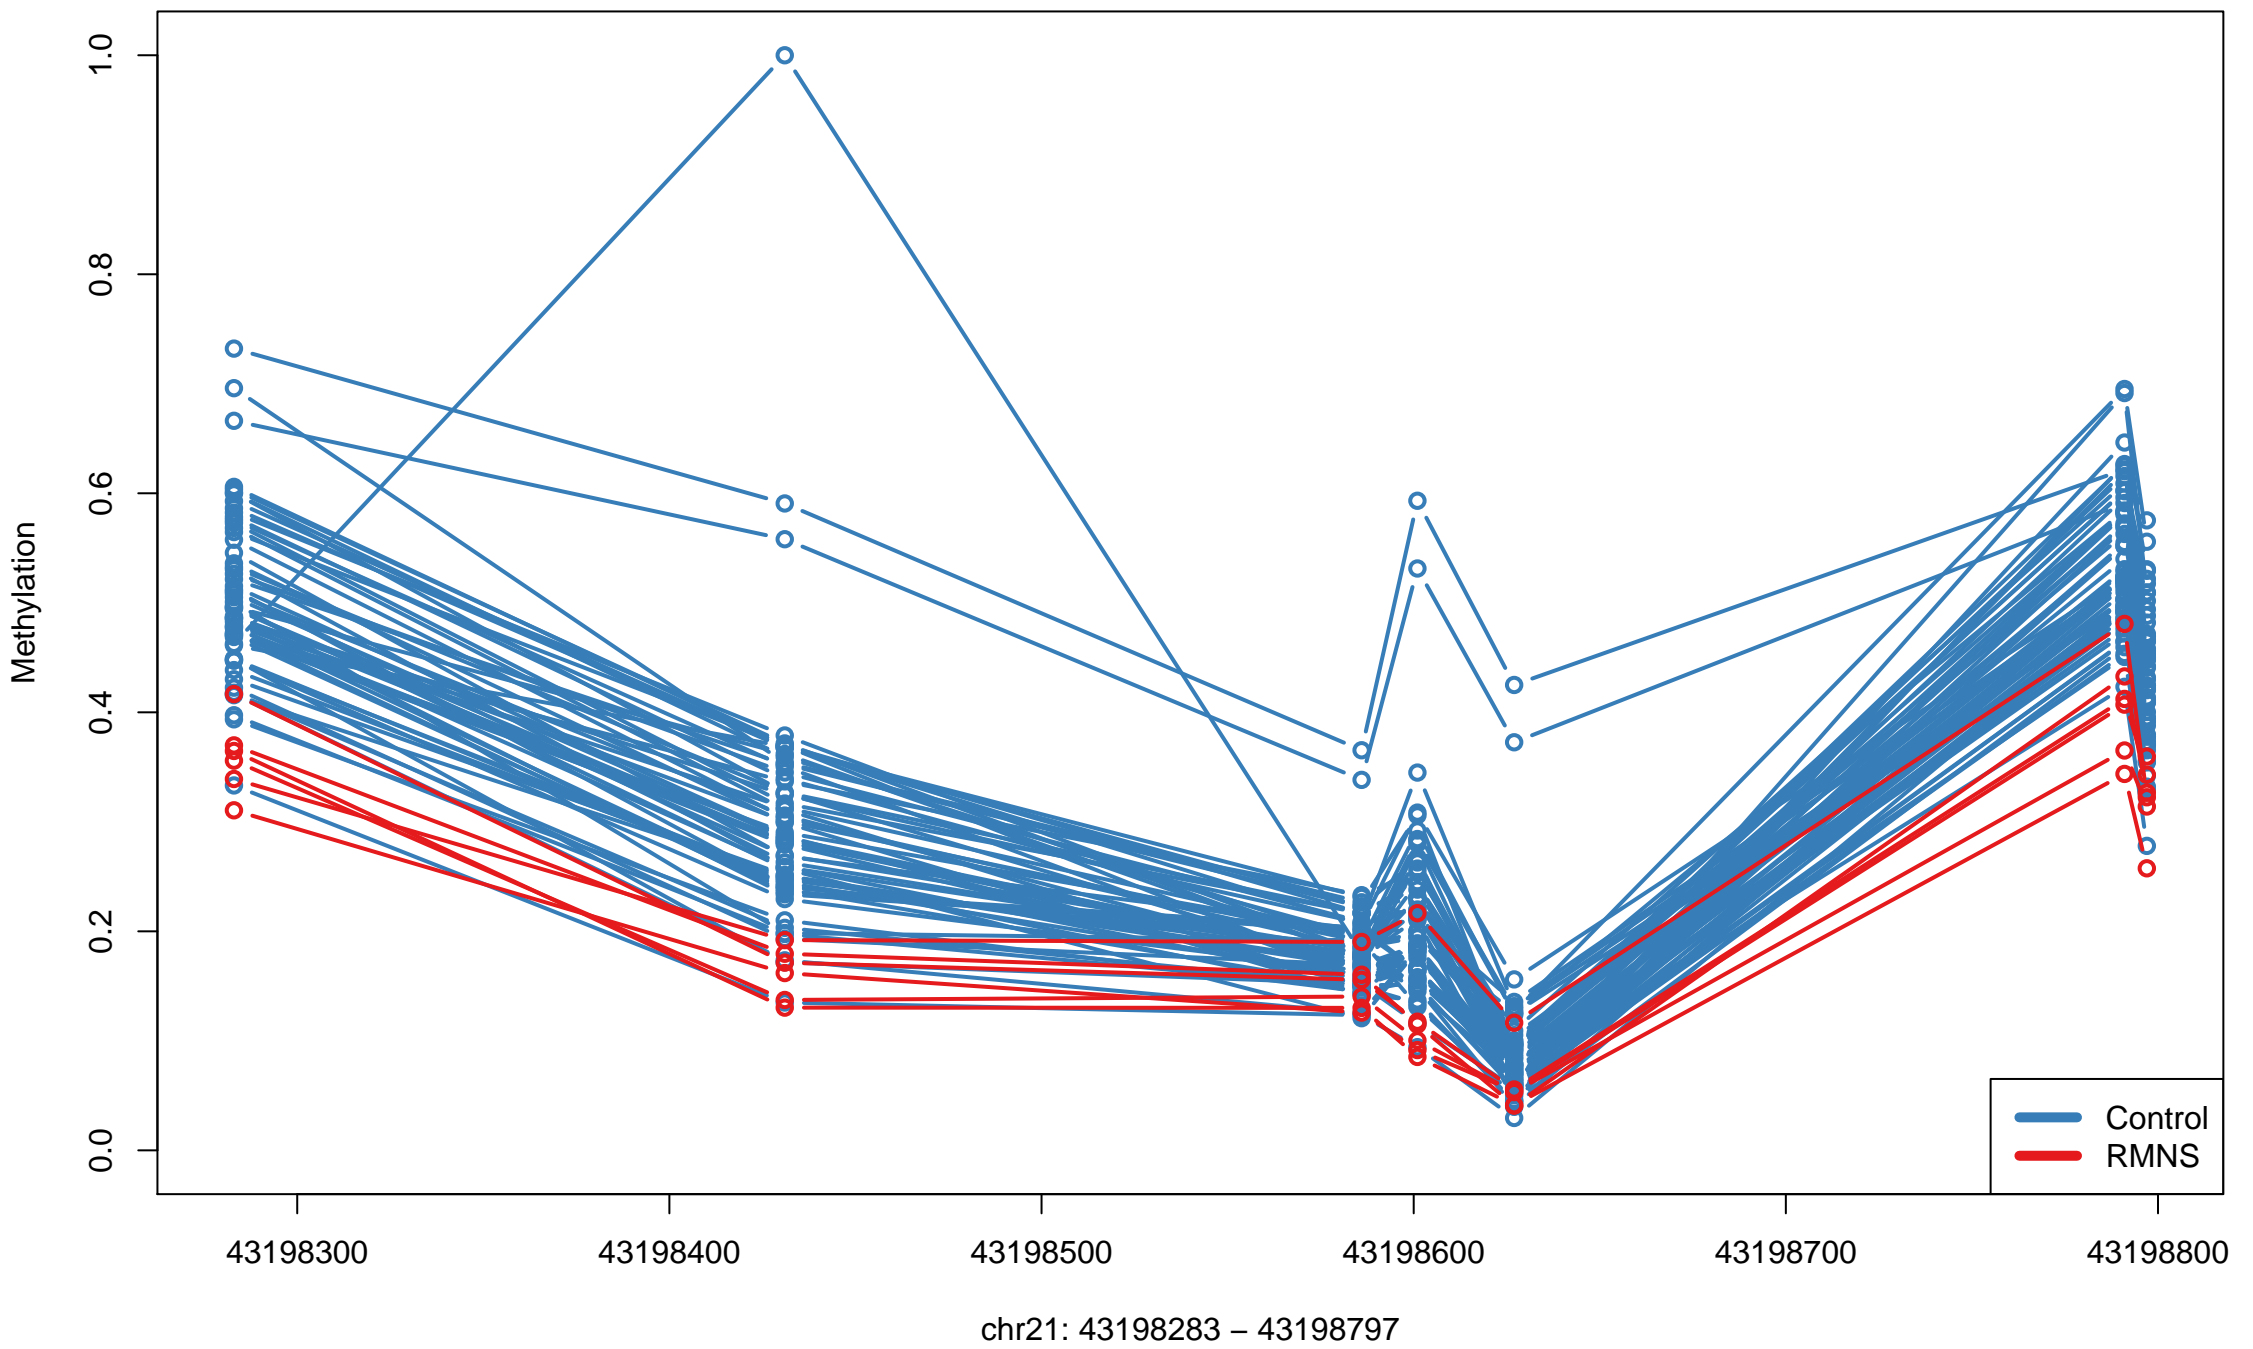

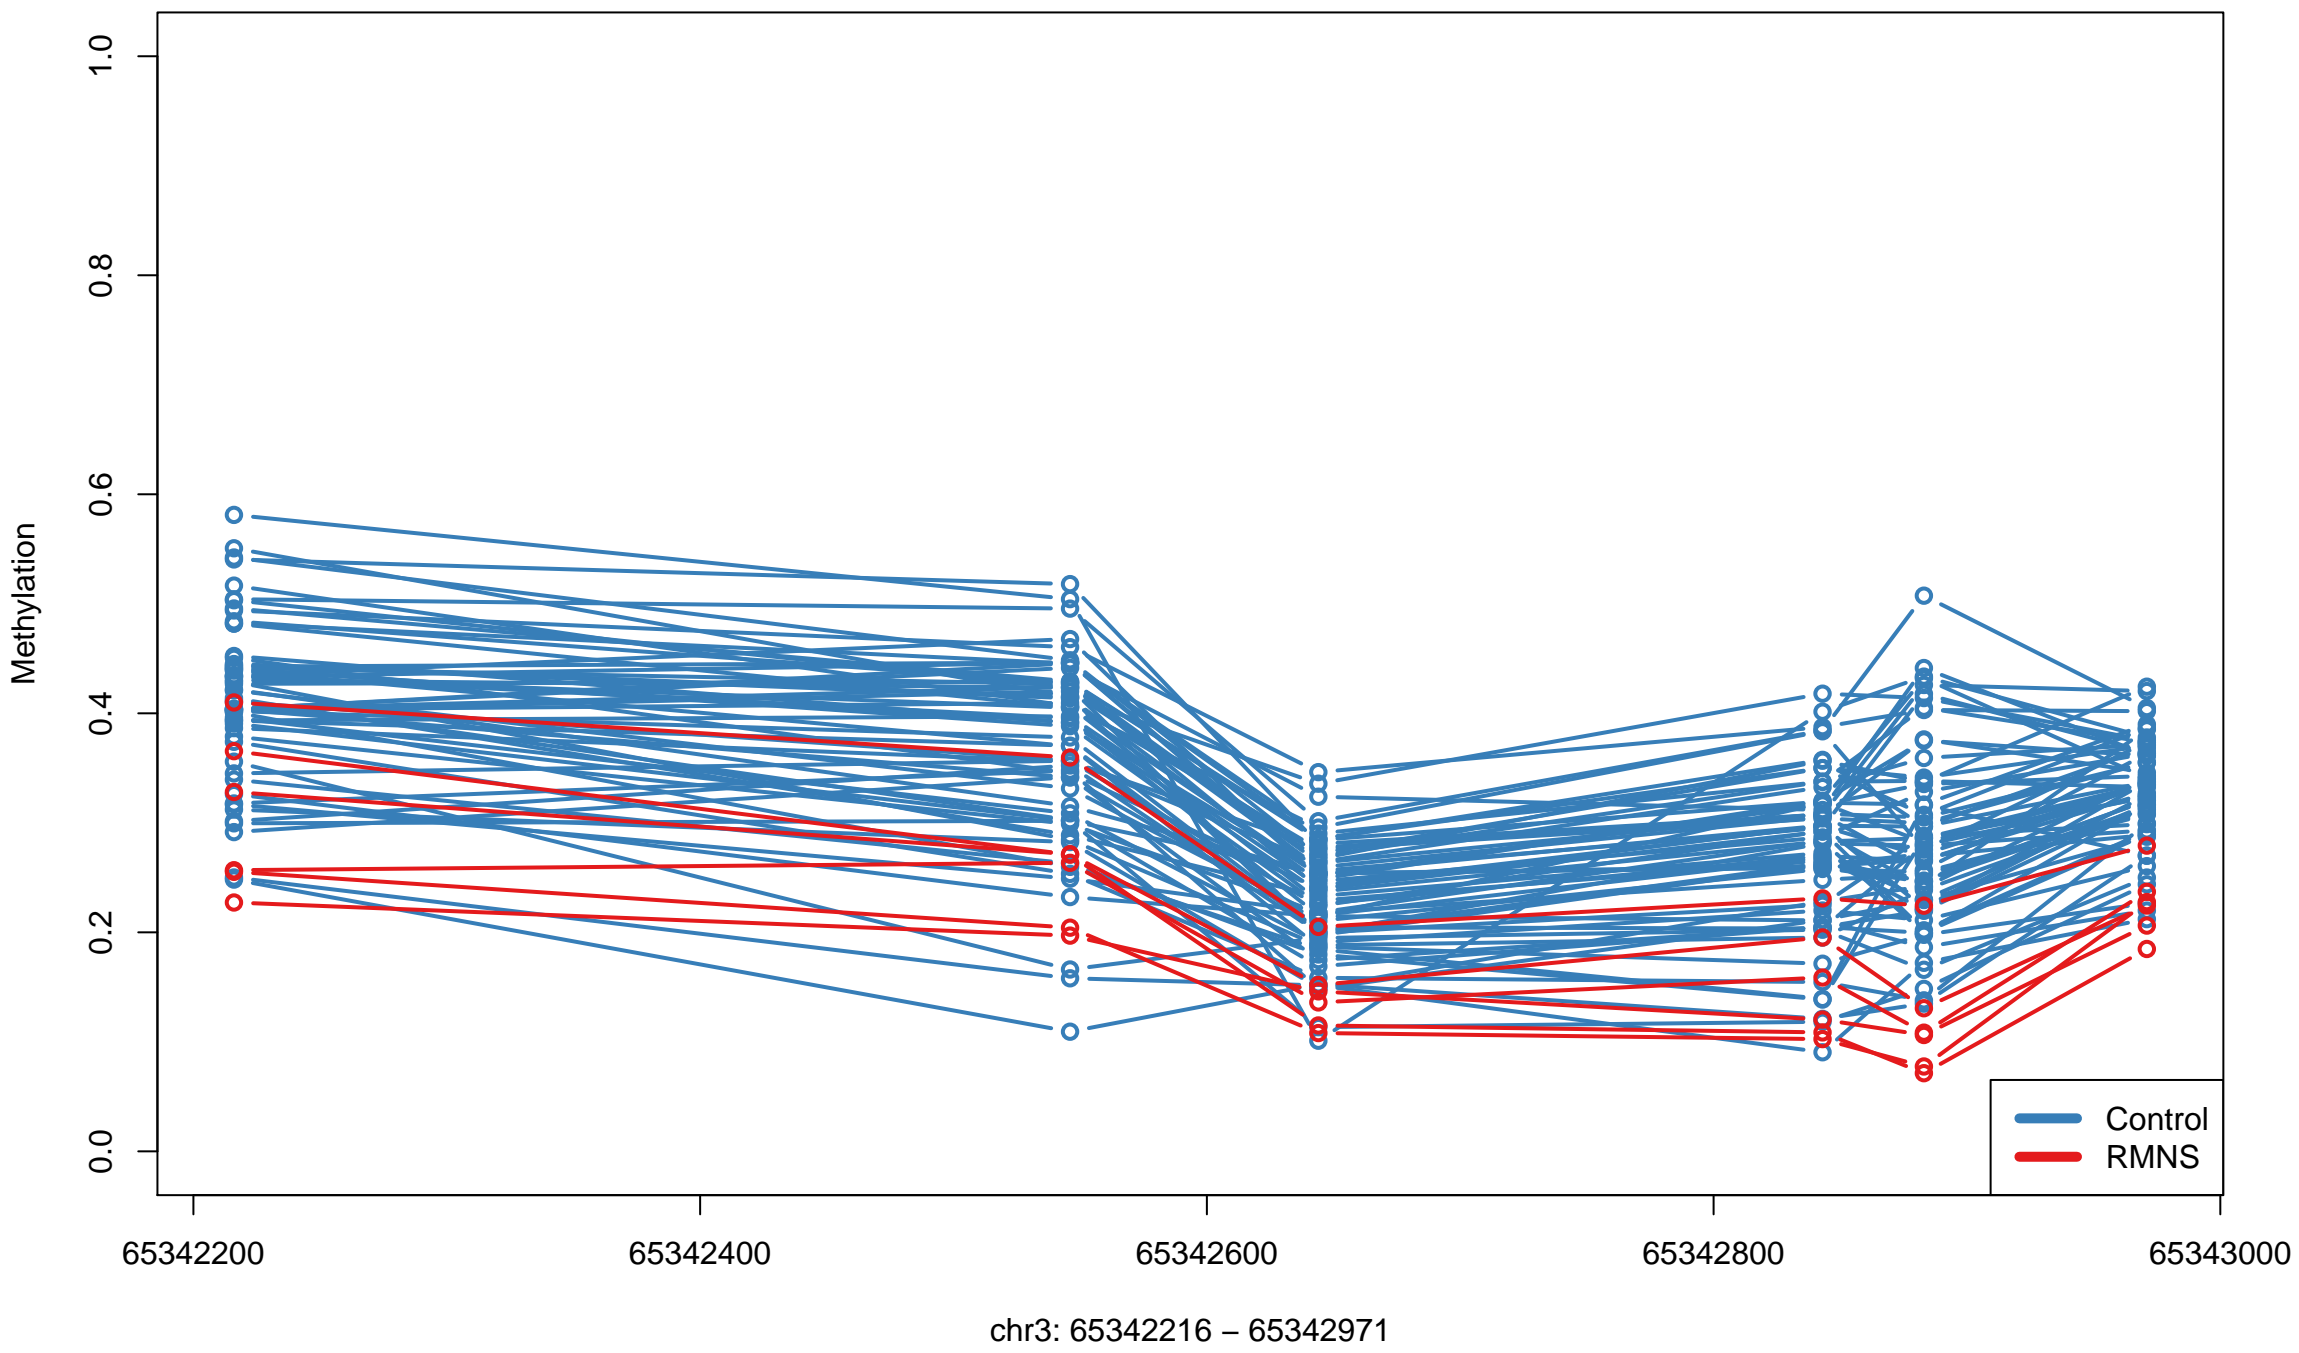

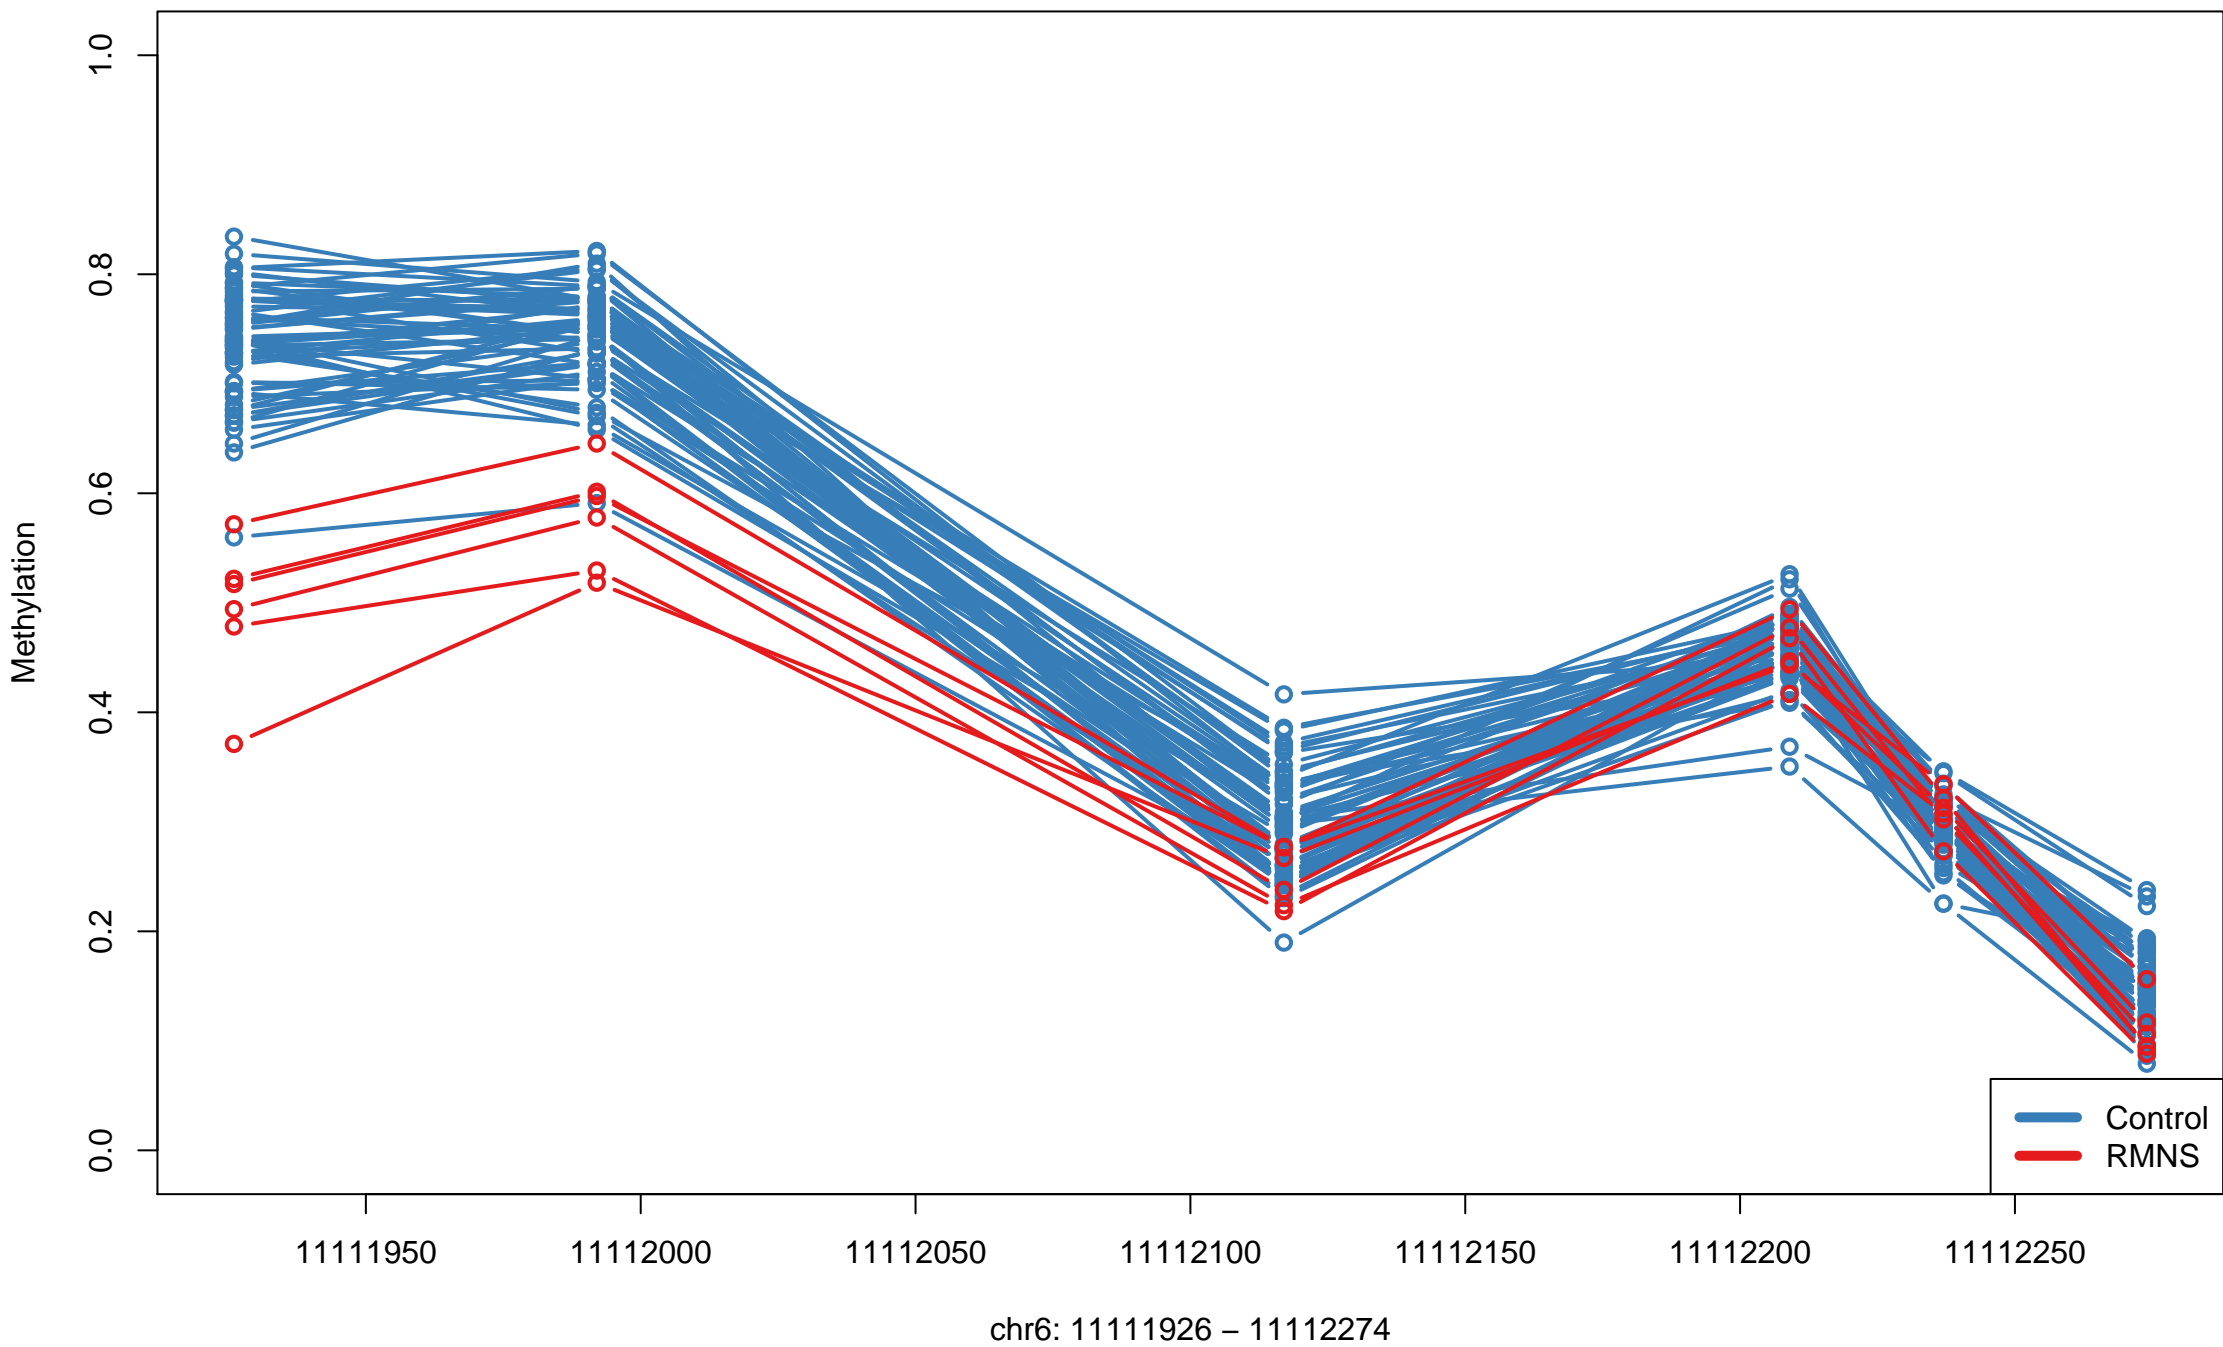

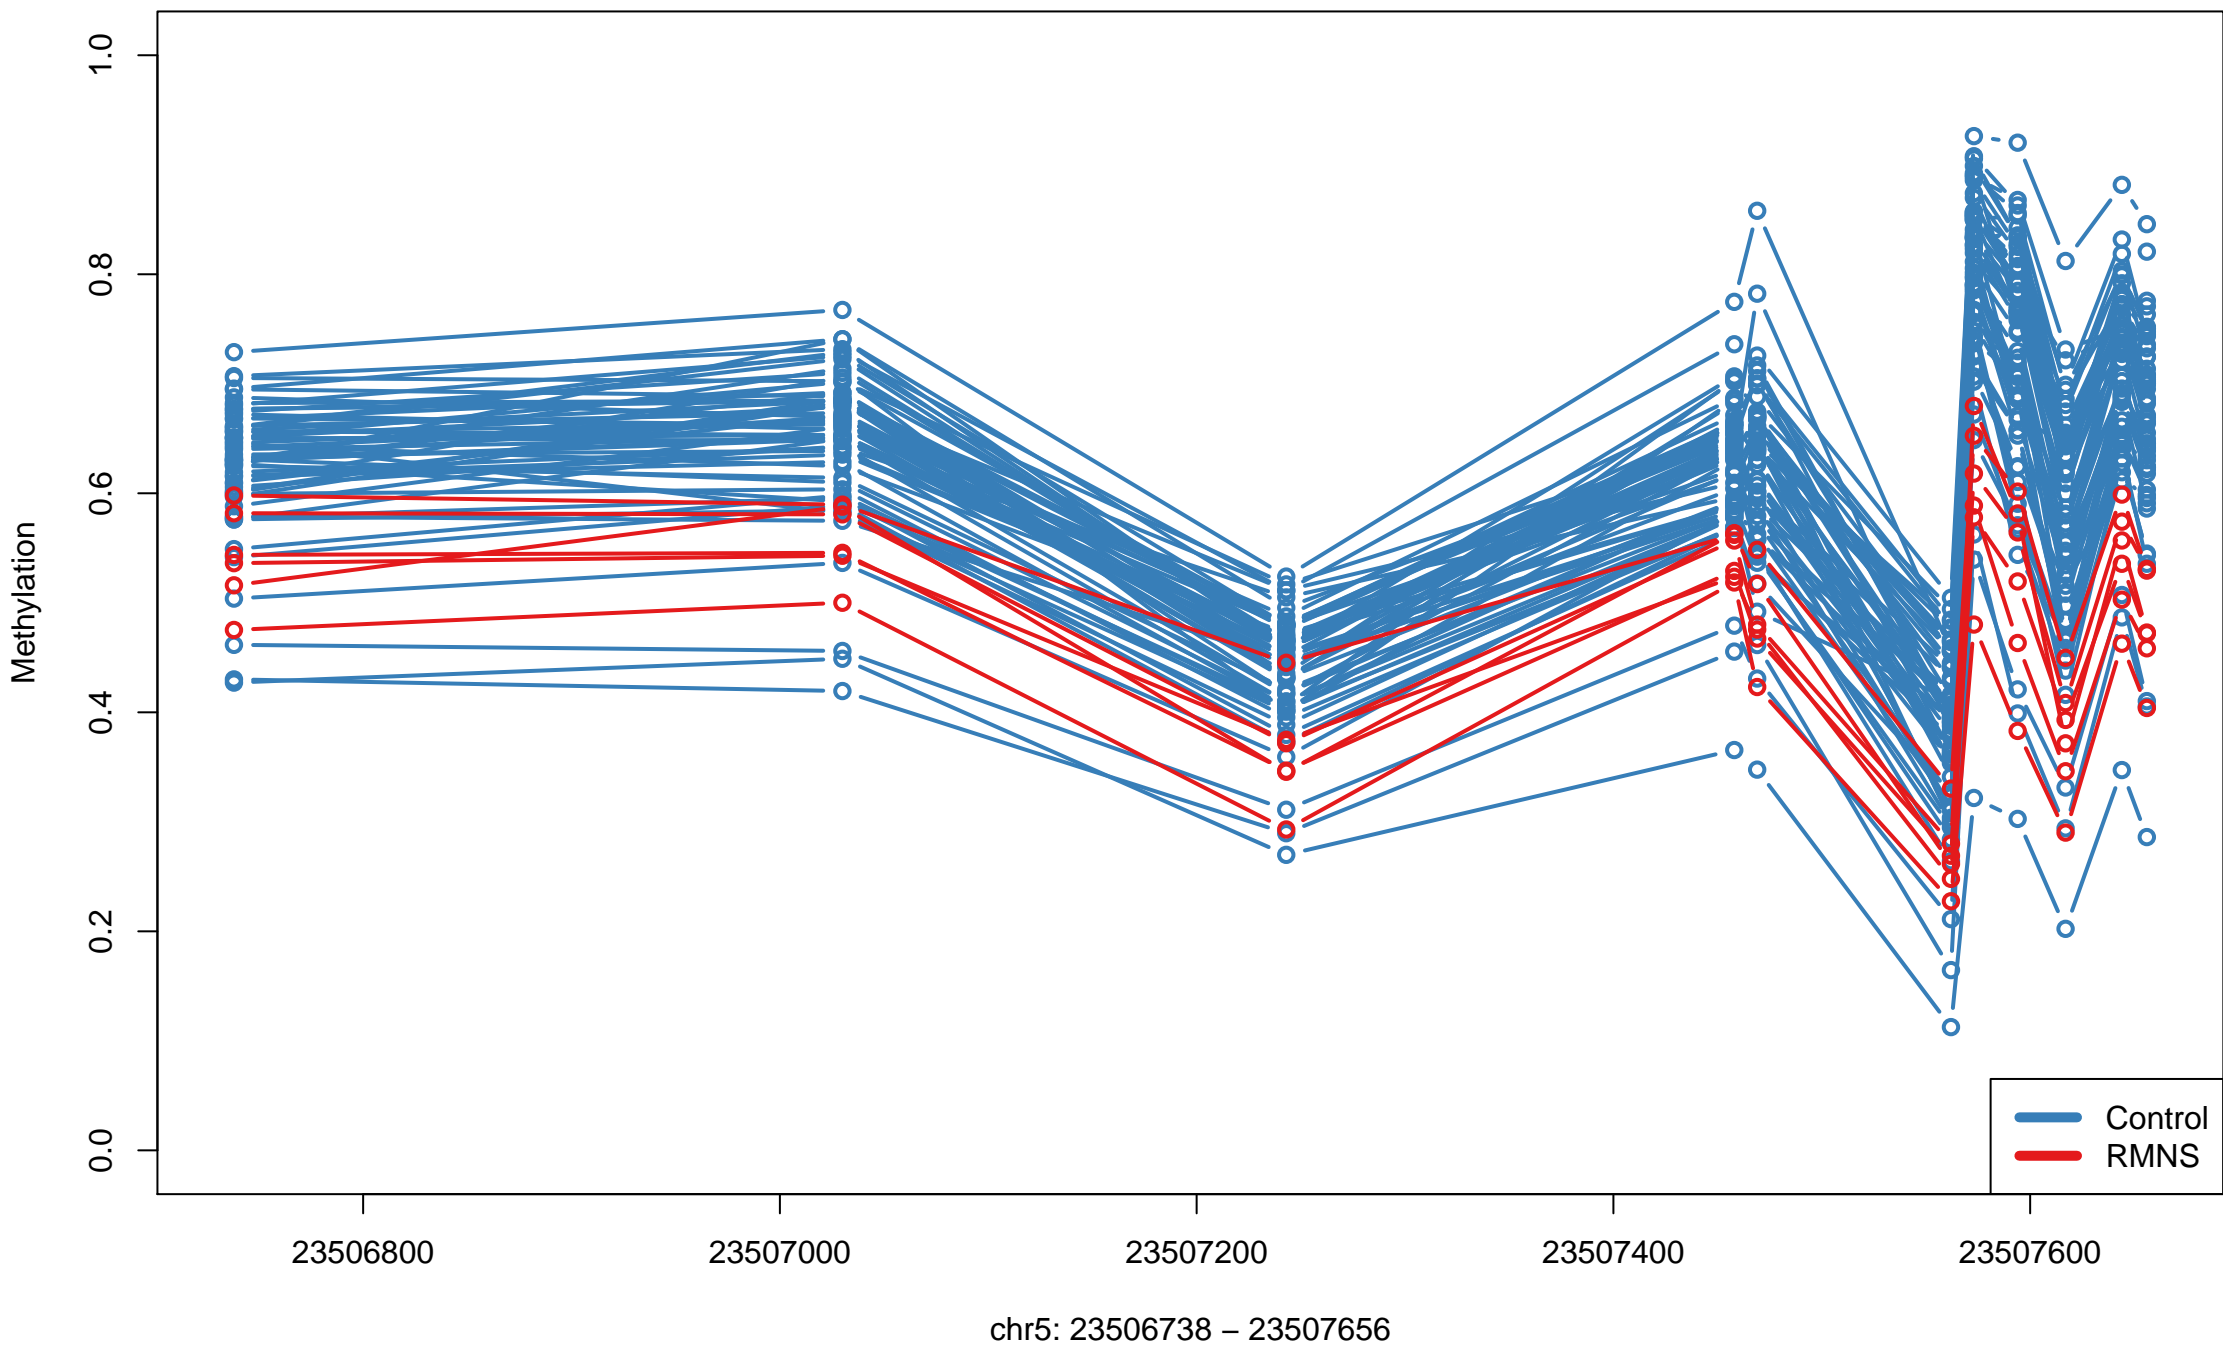



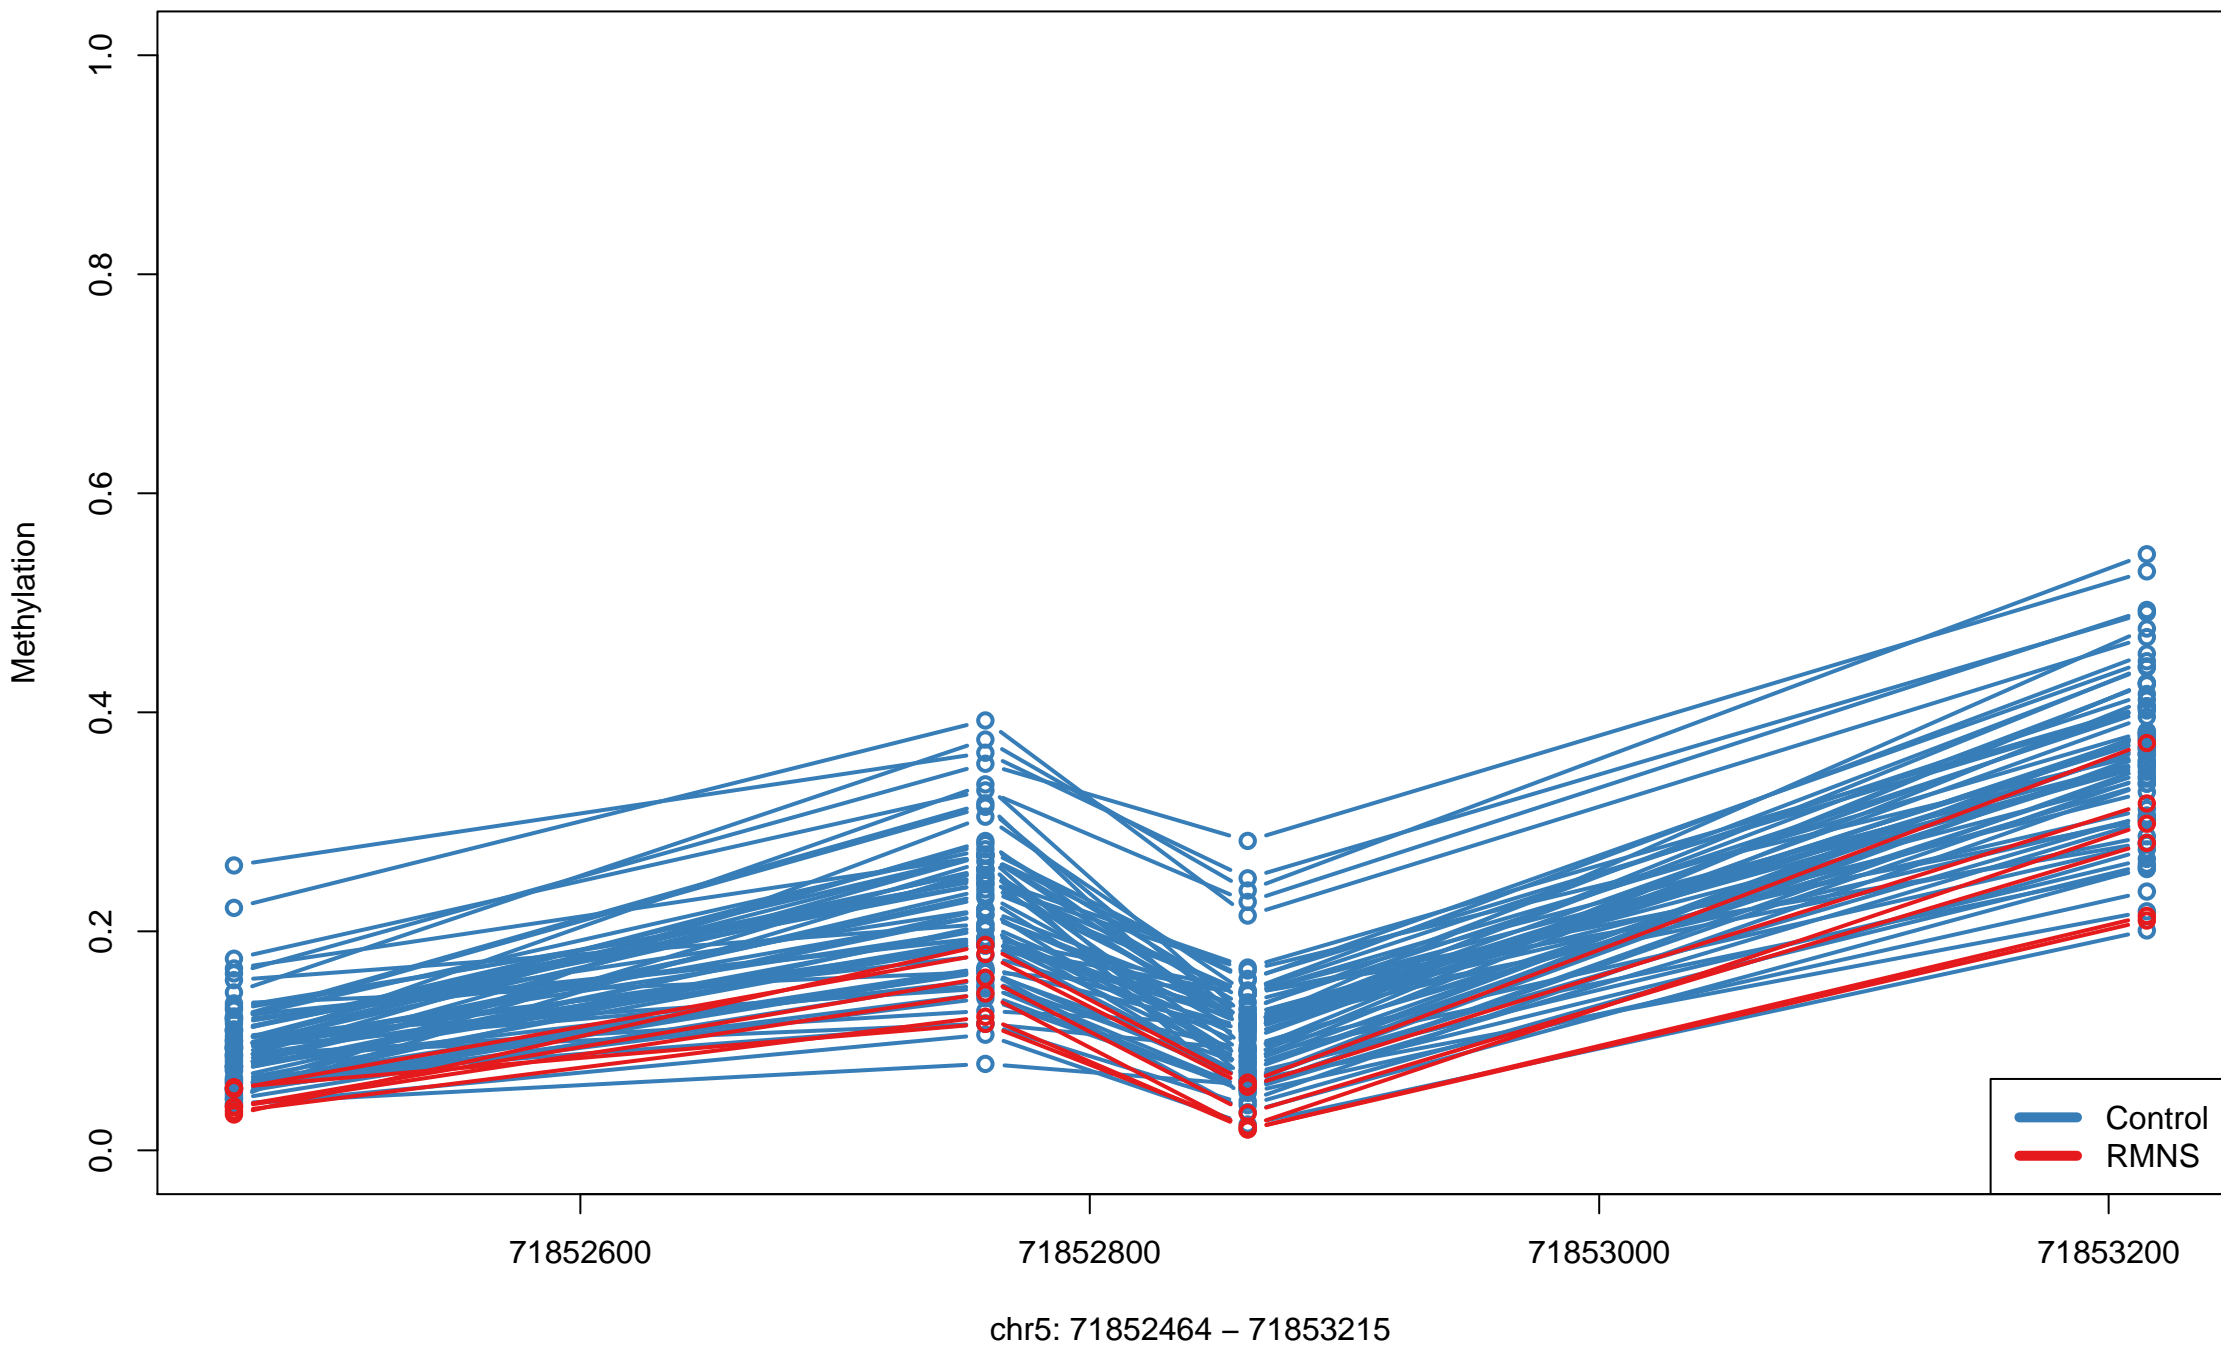



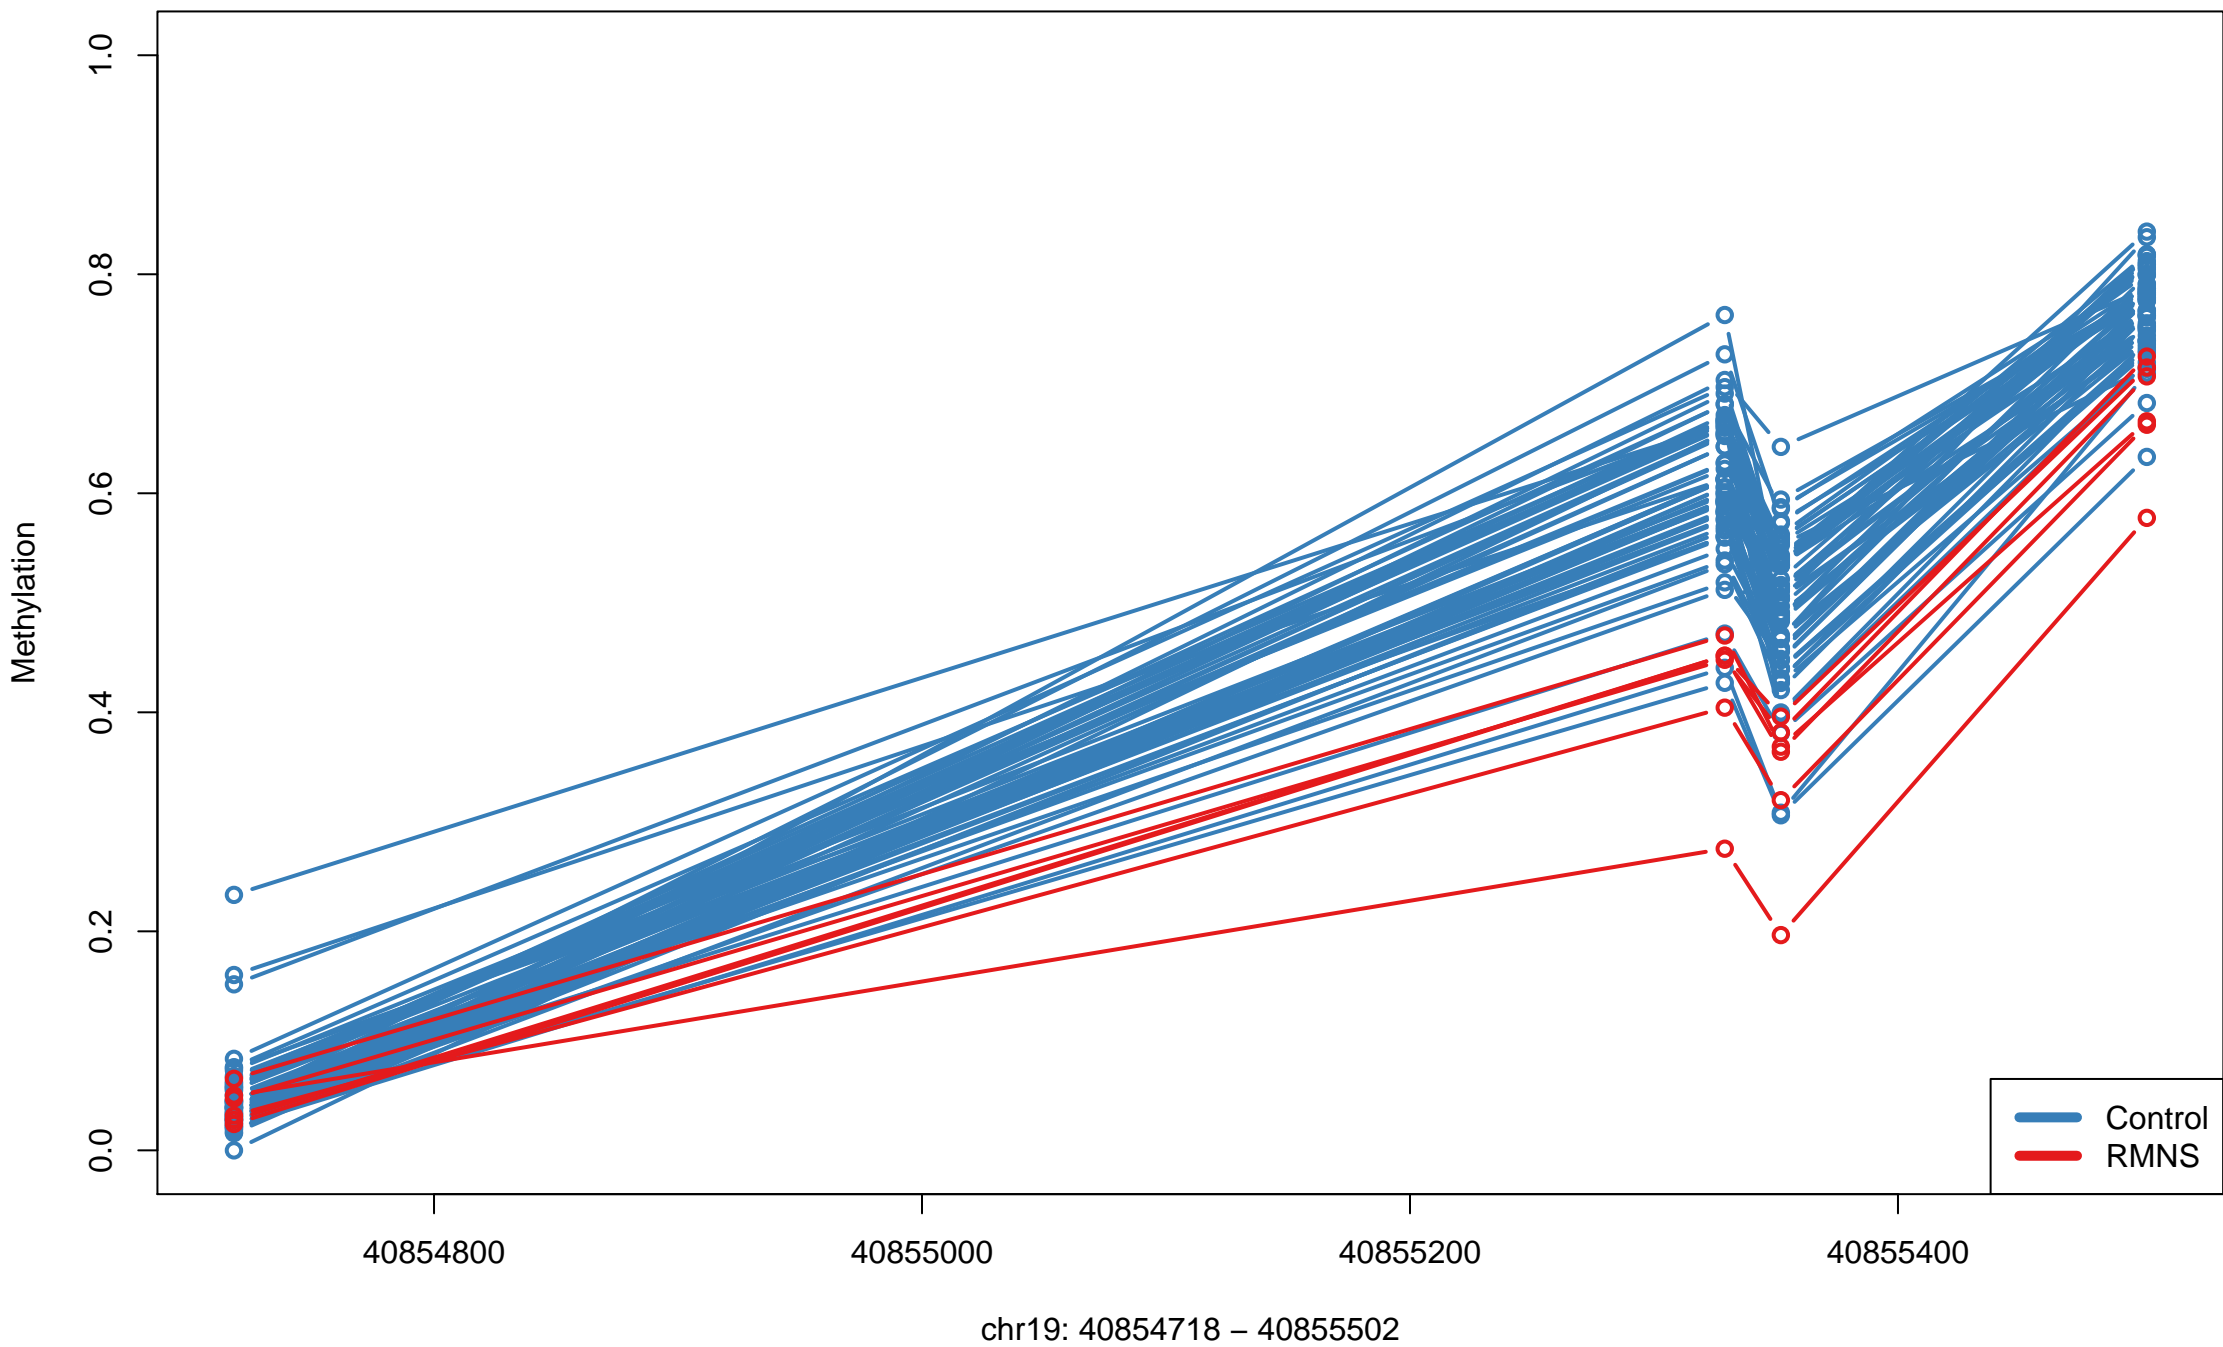

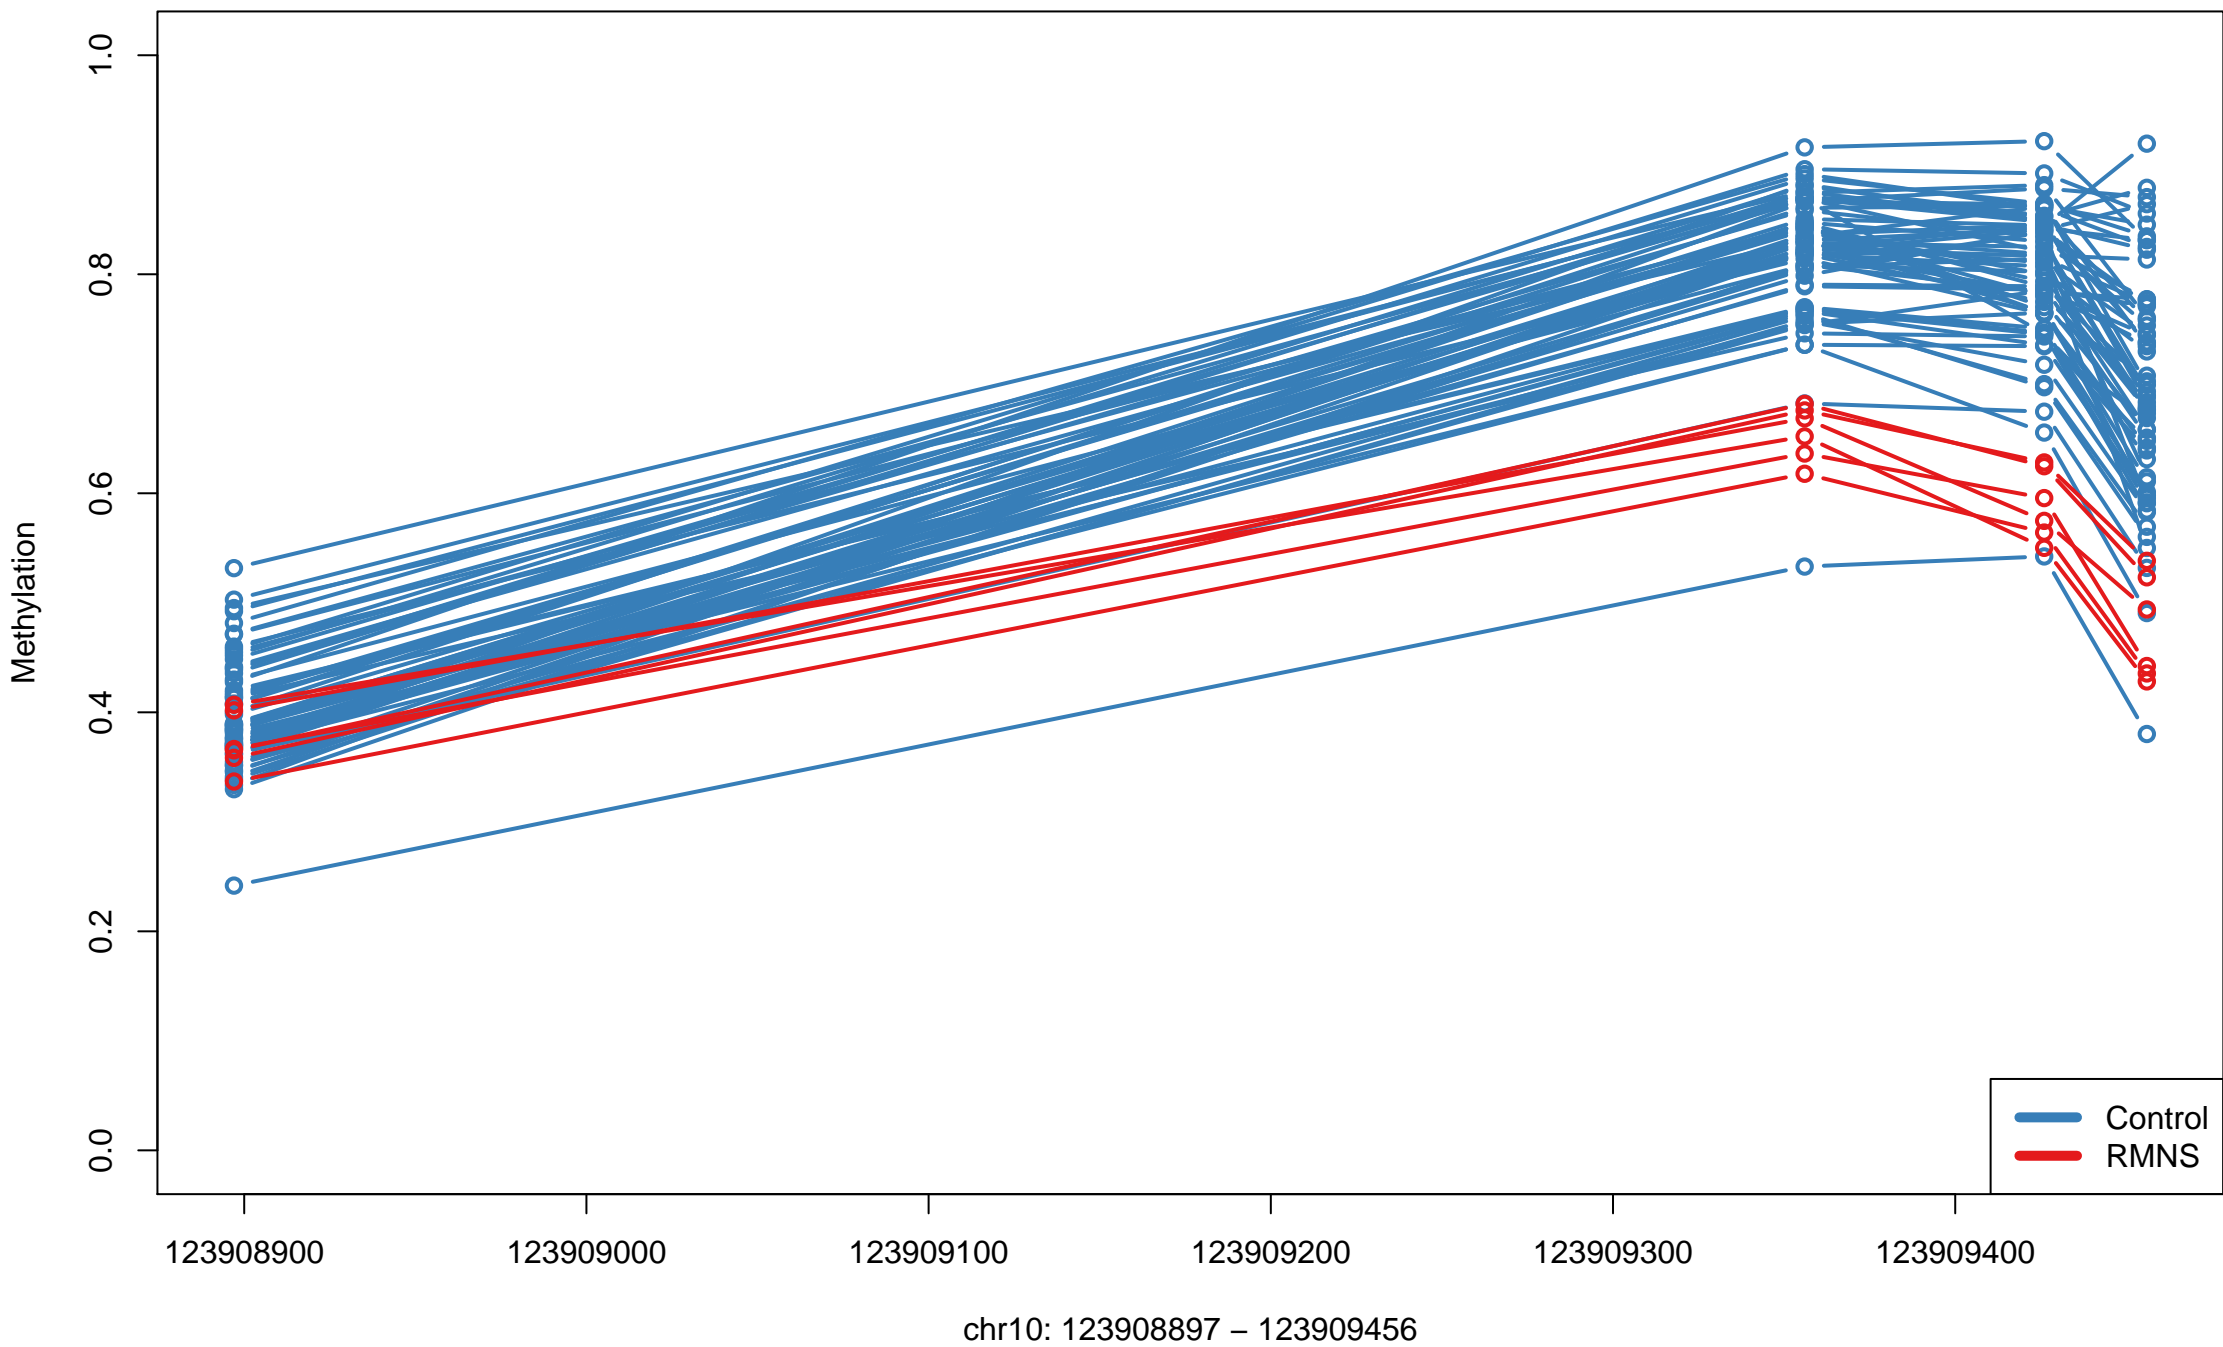

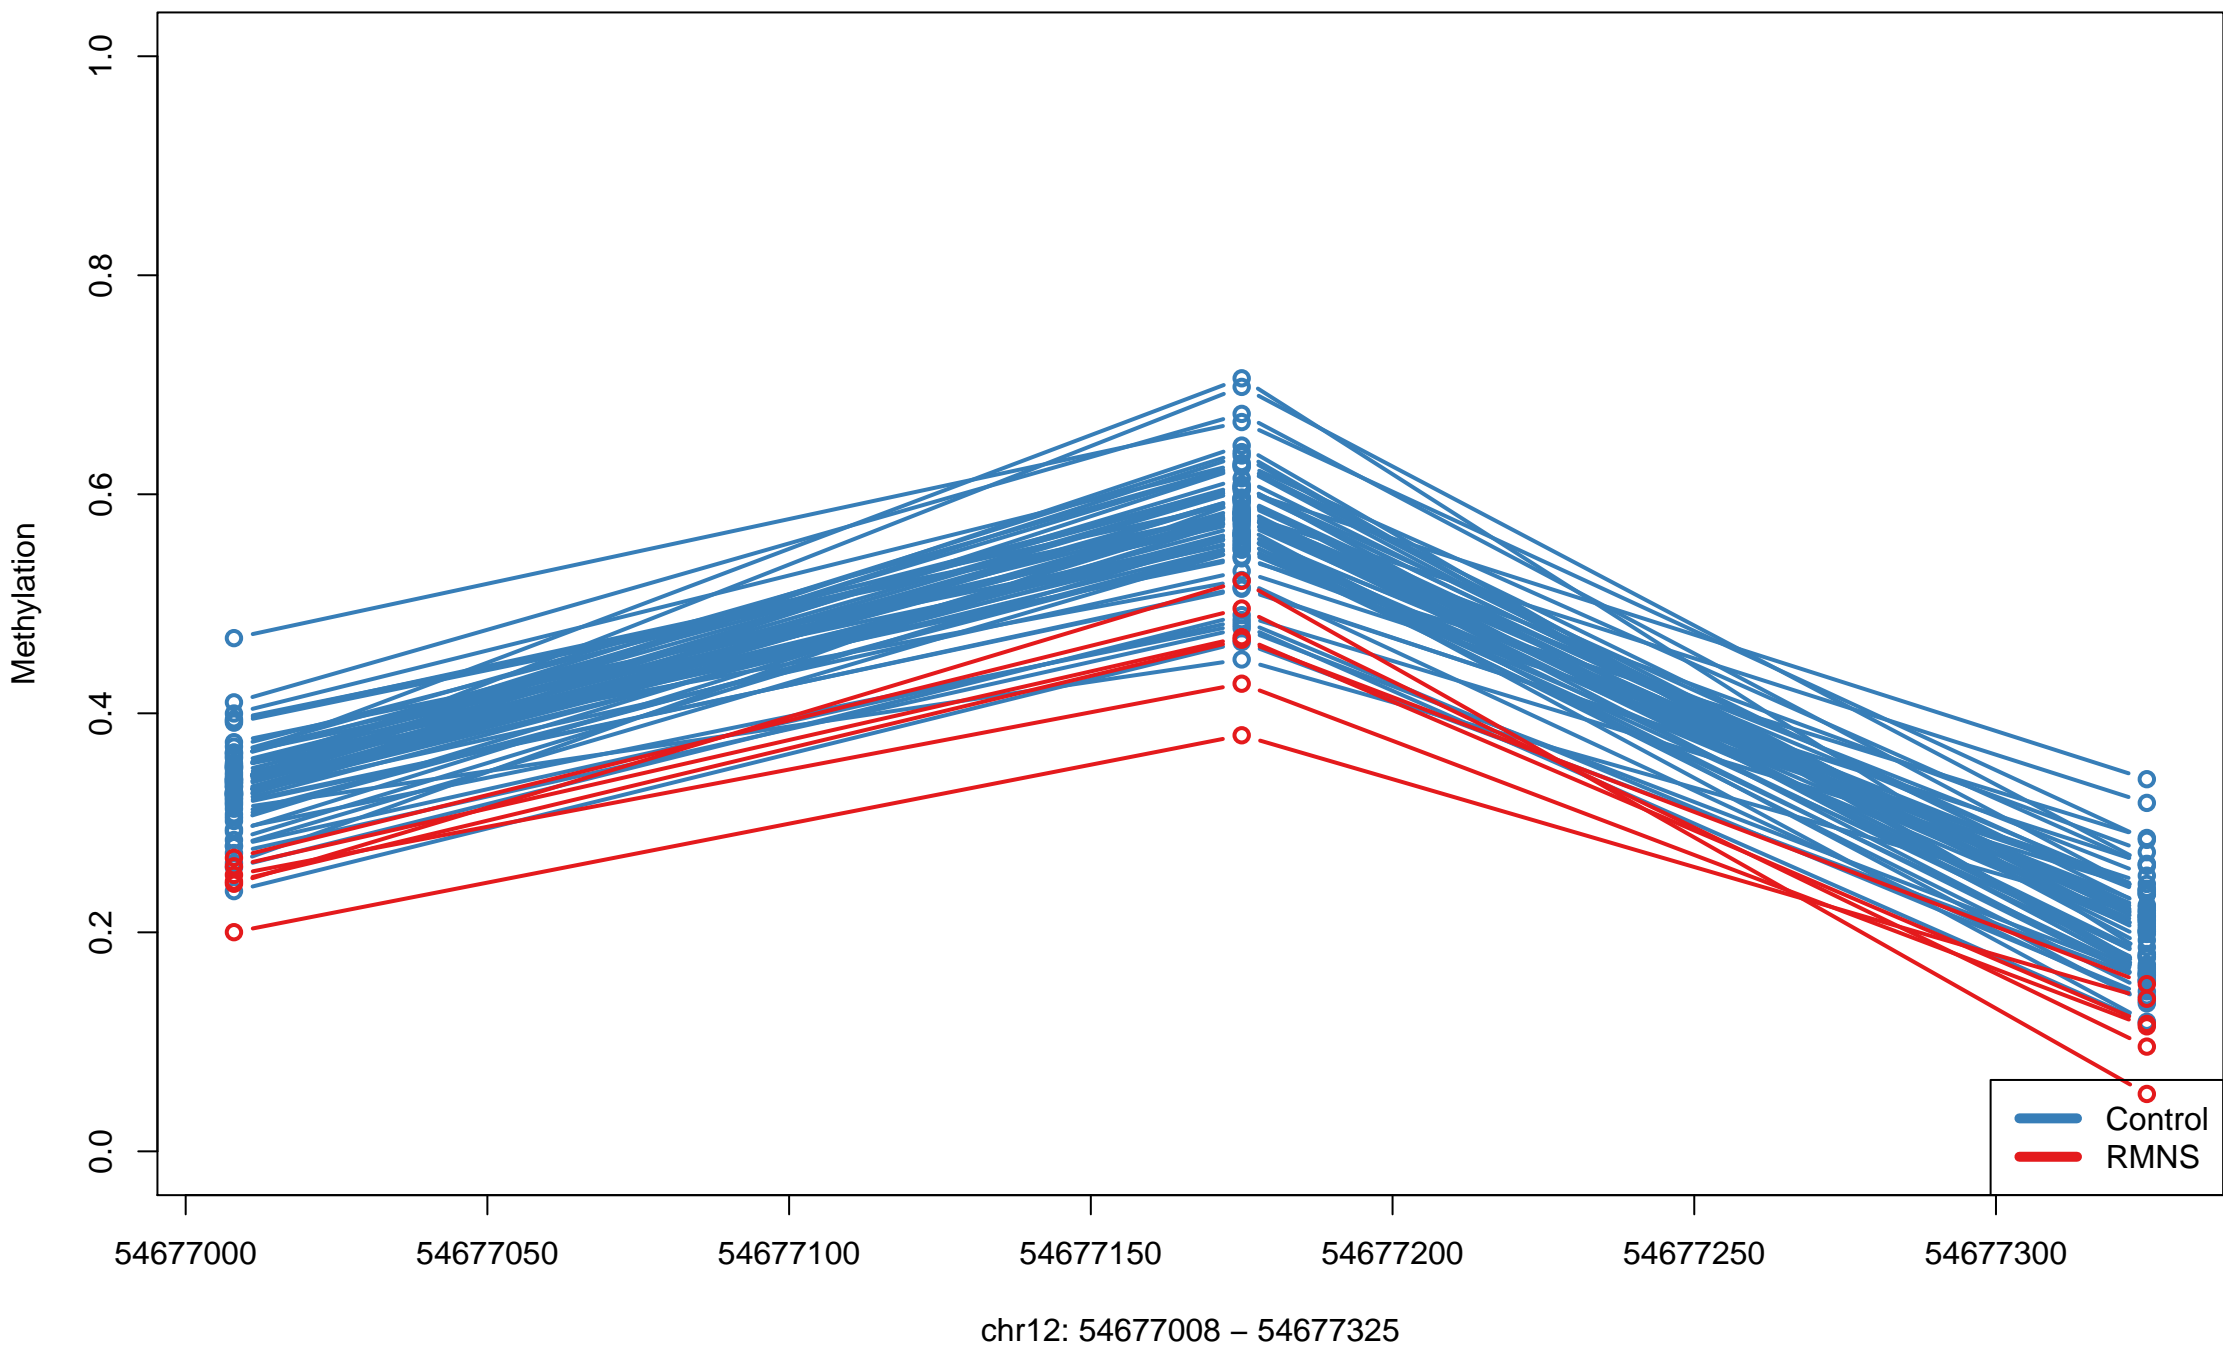

chr12: 54677008 - 54677325

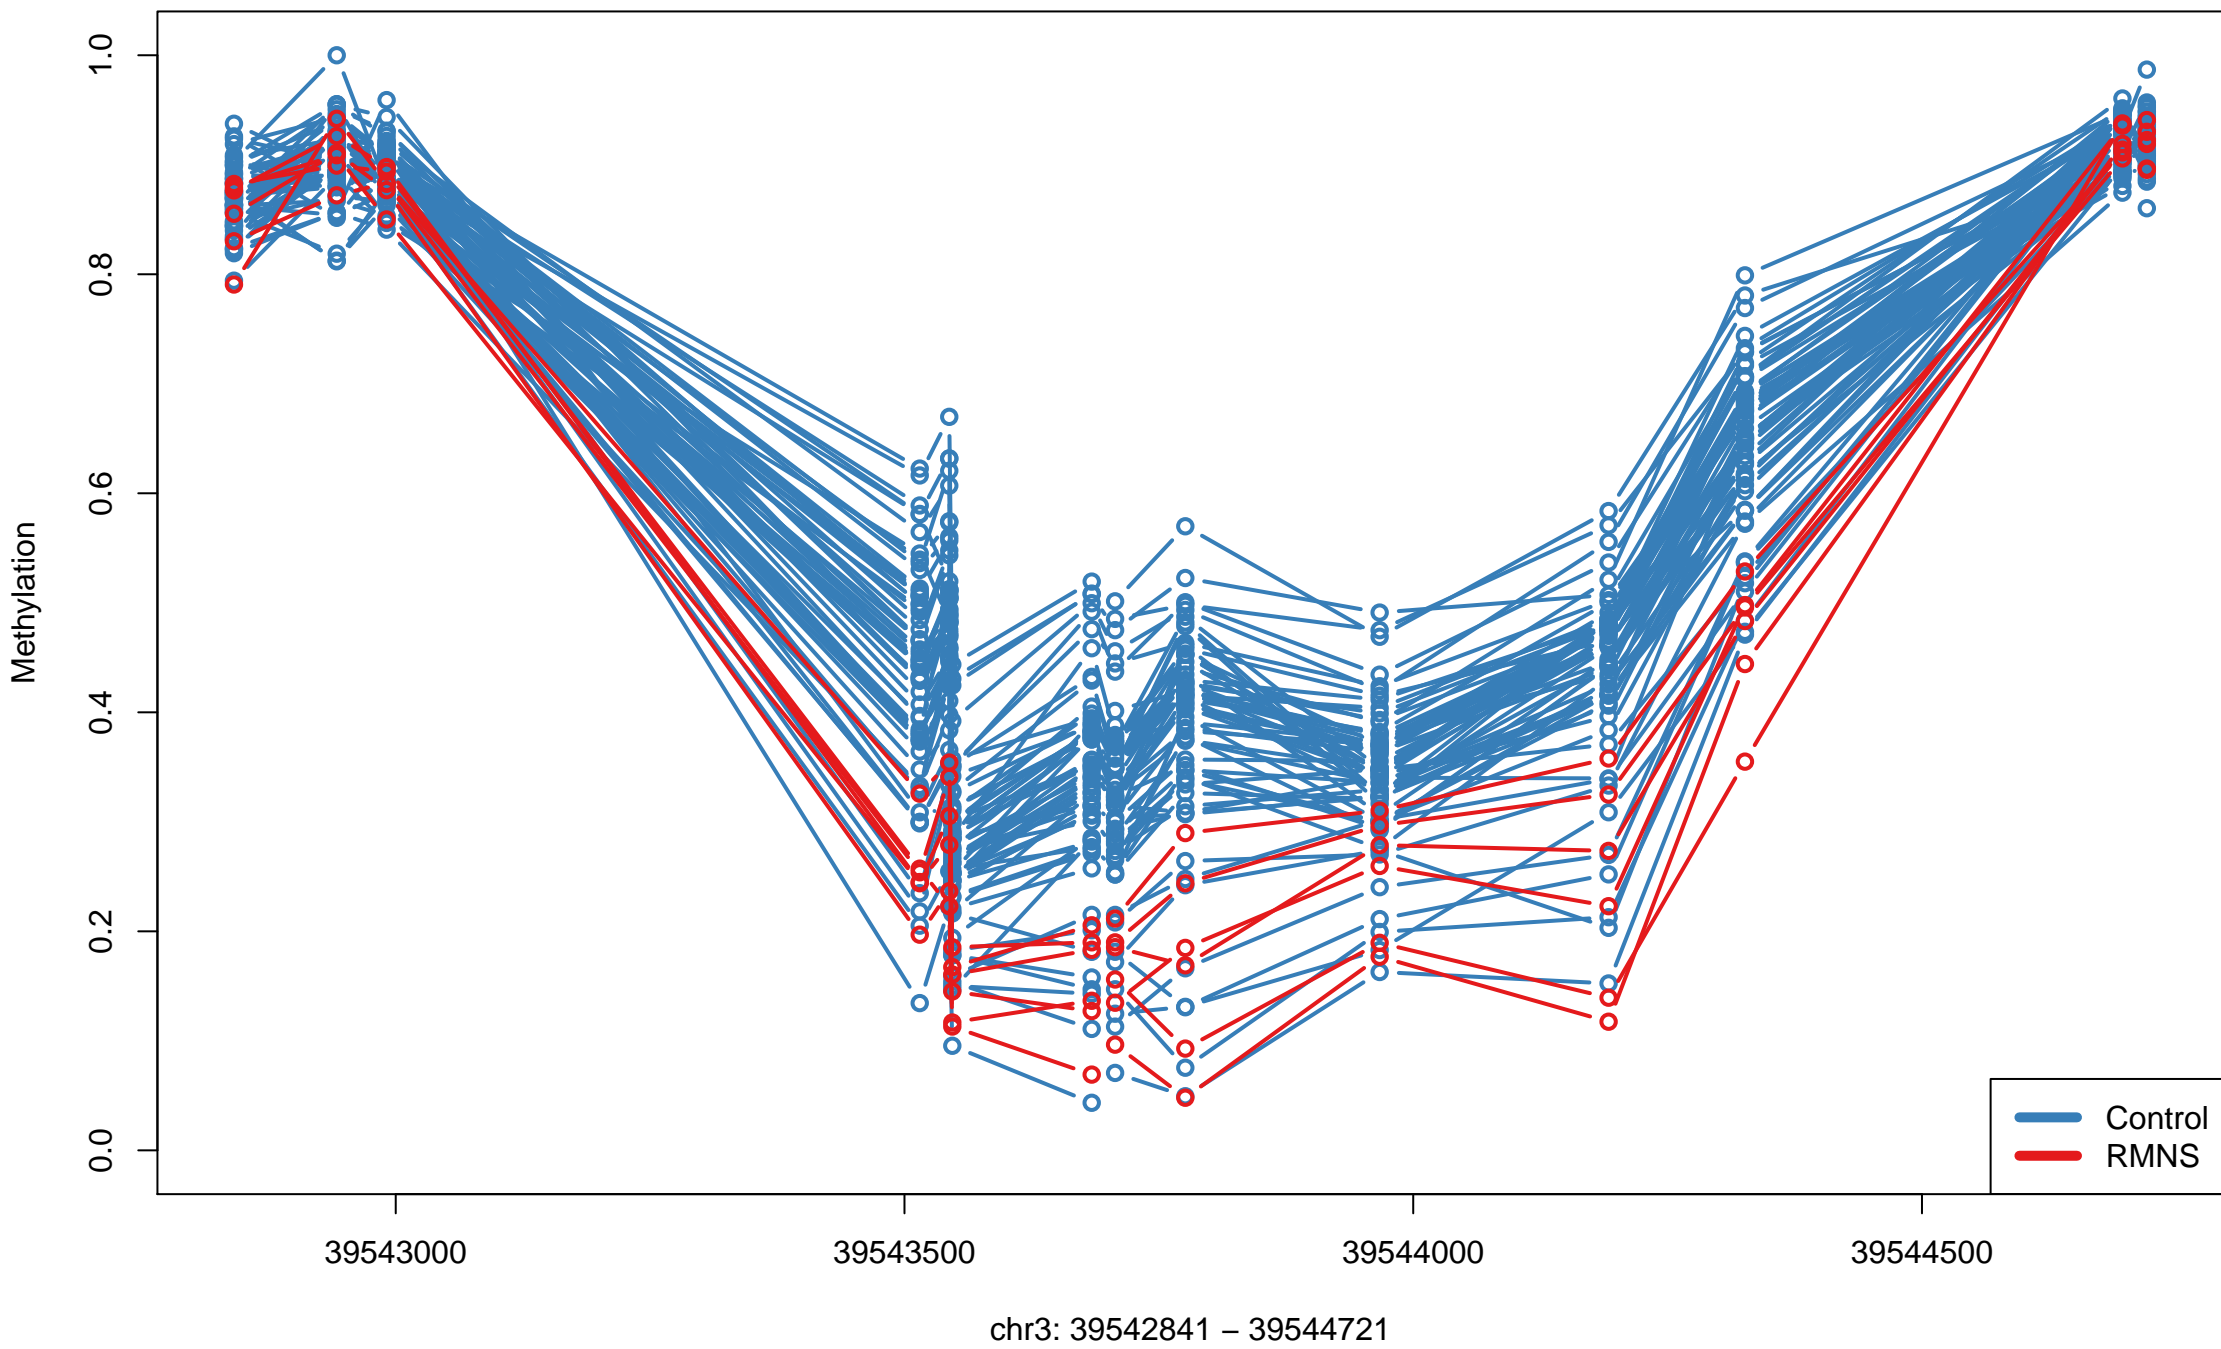

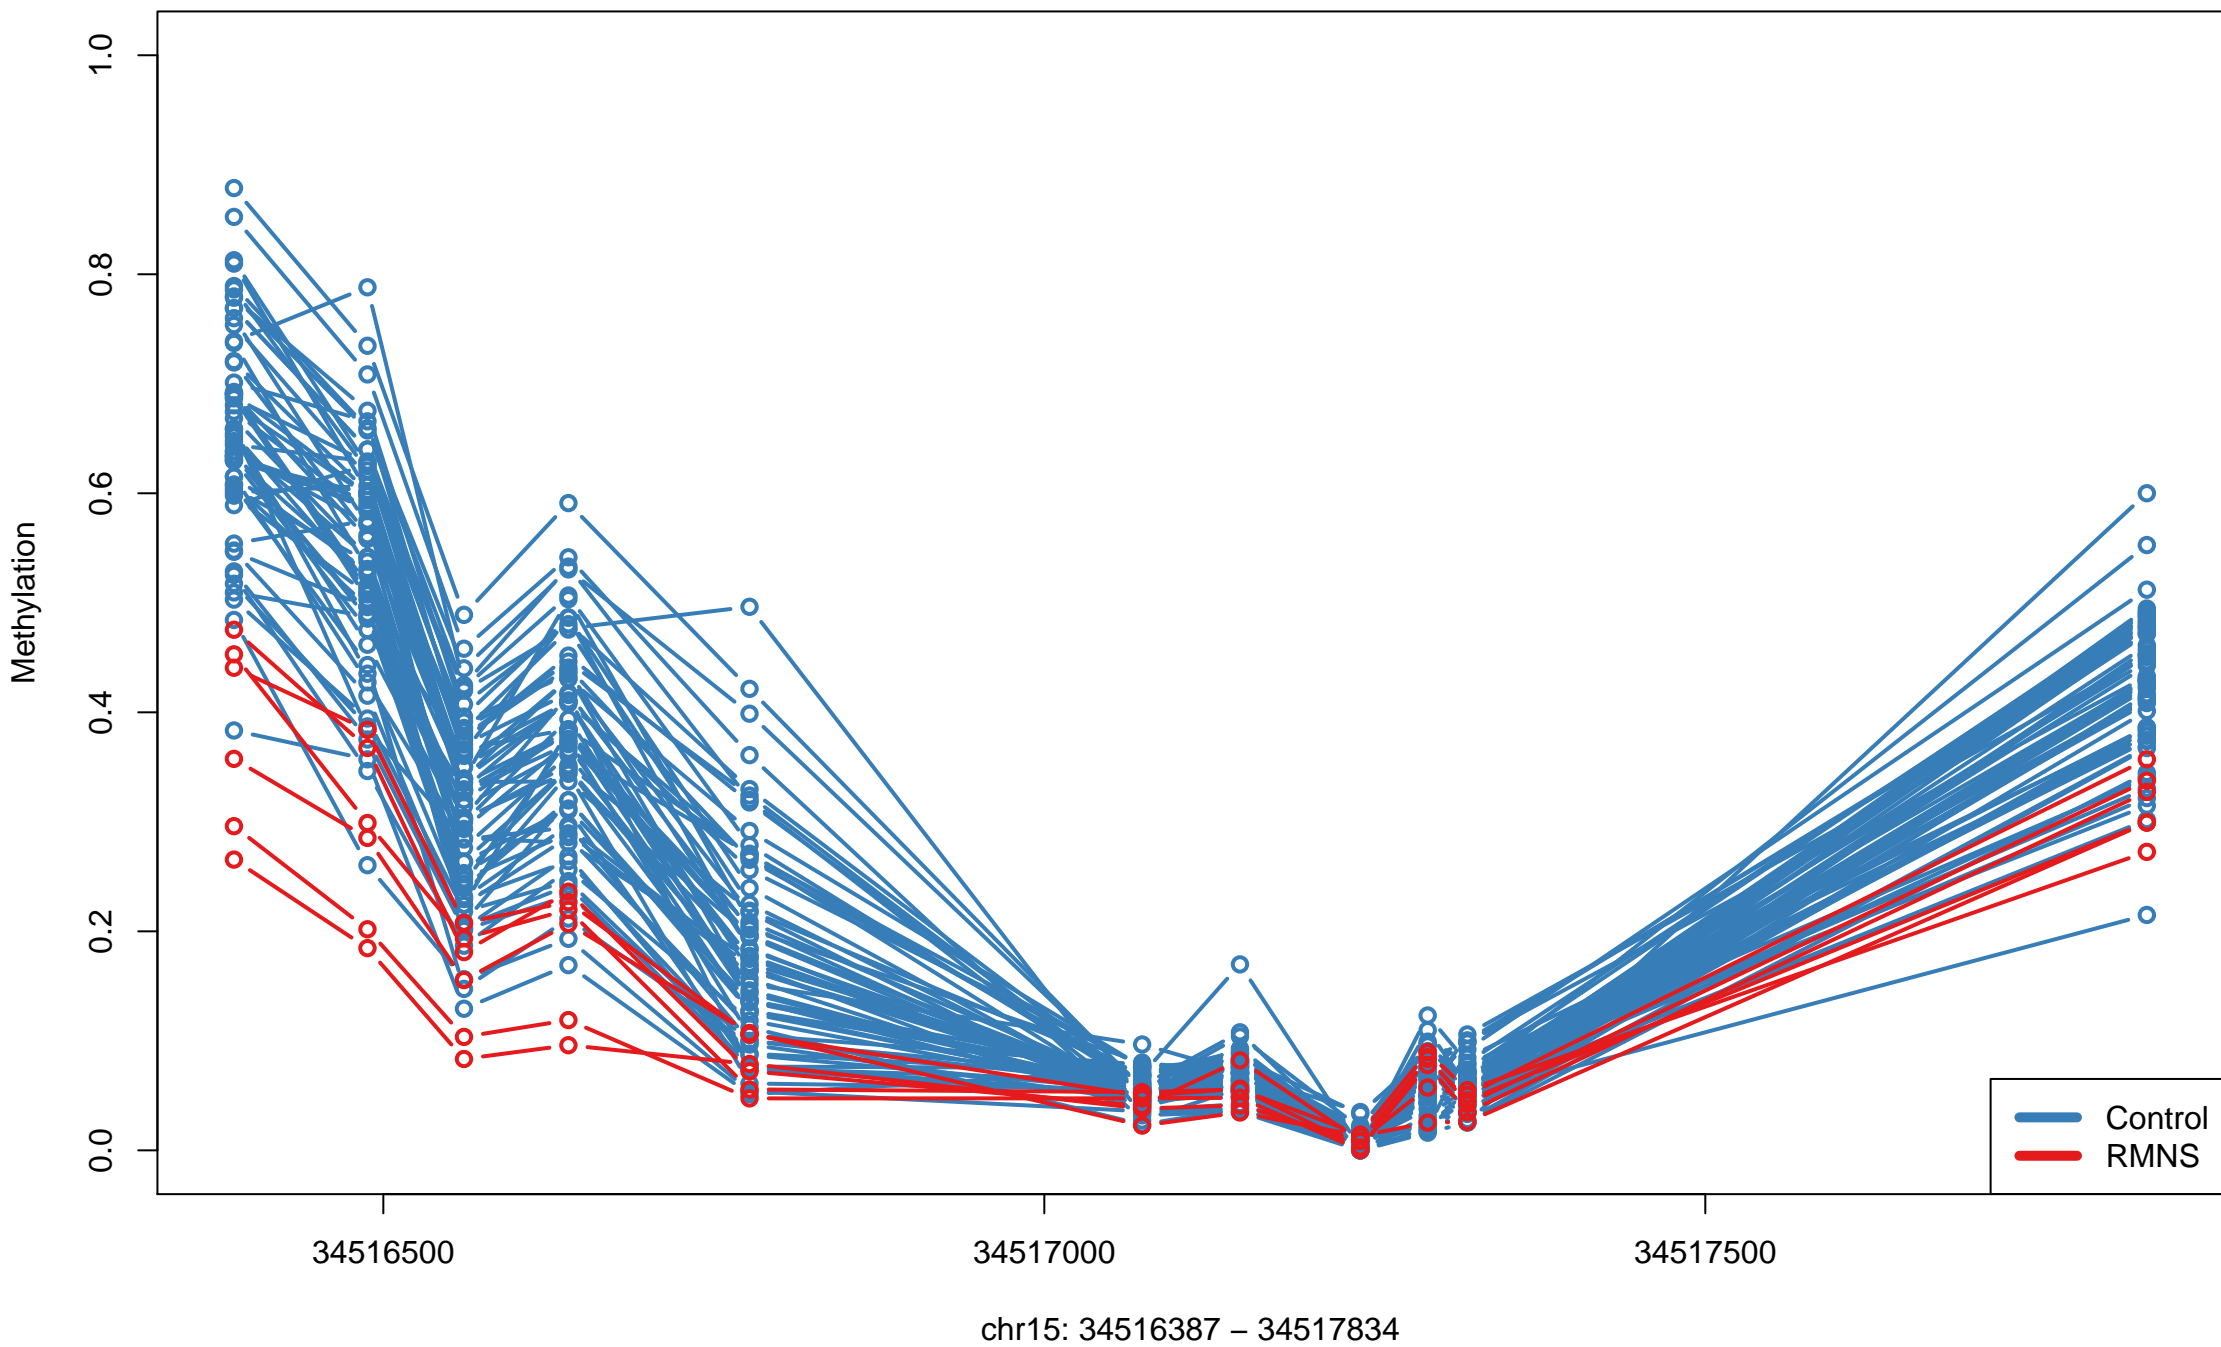

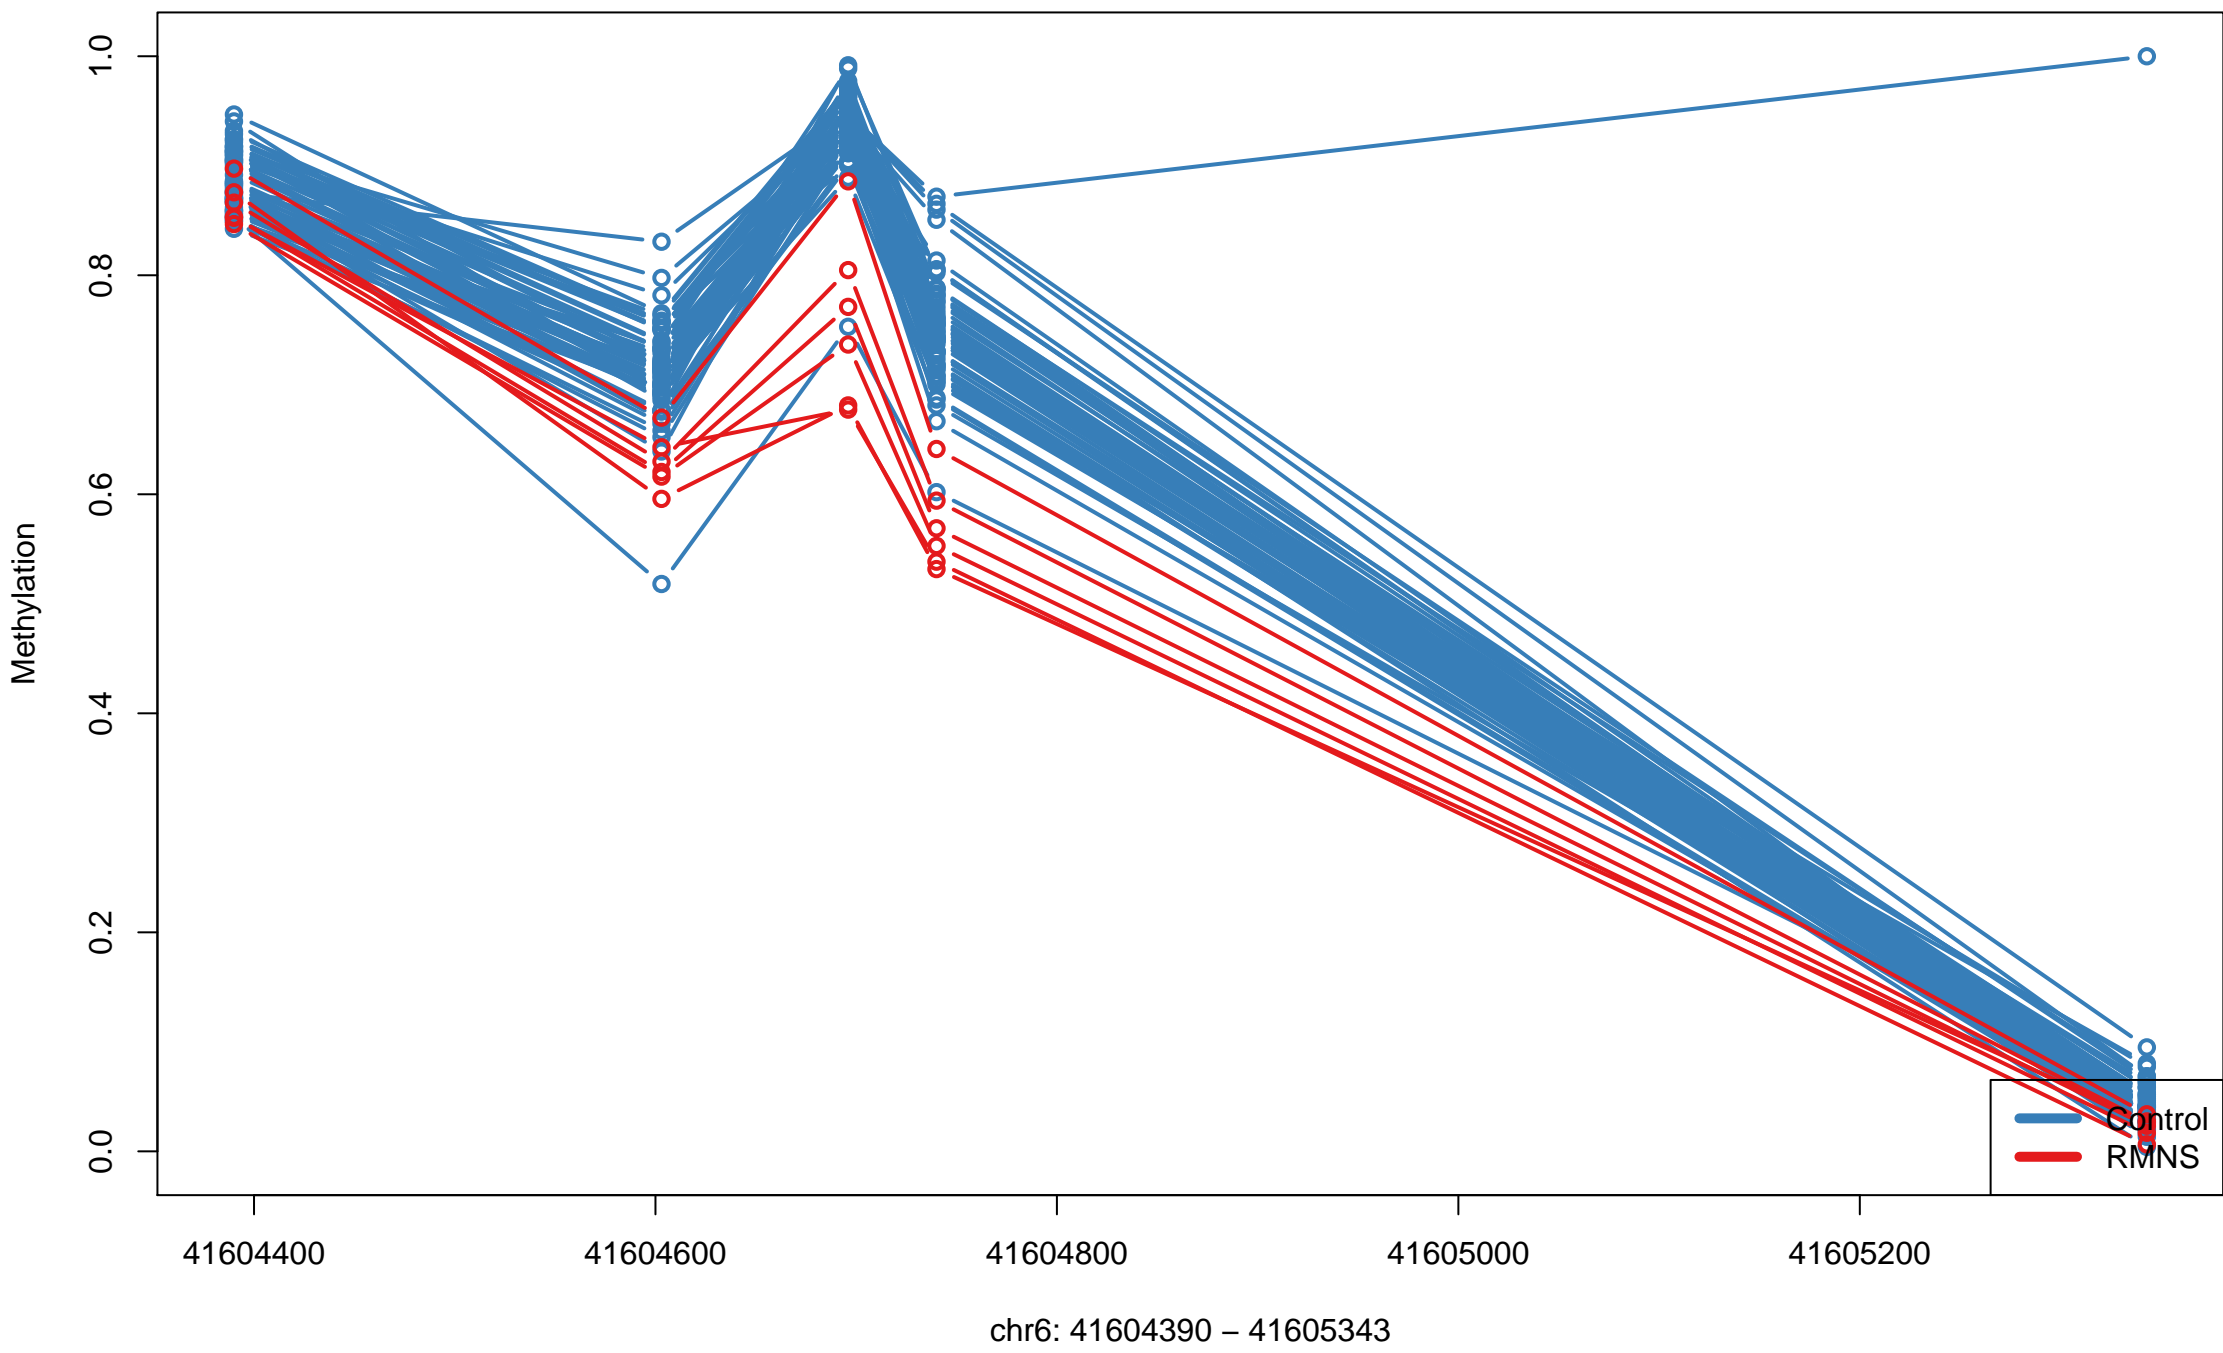



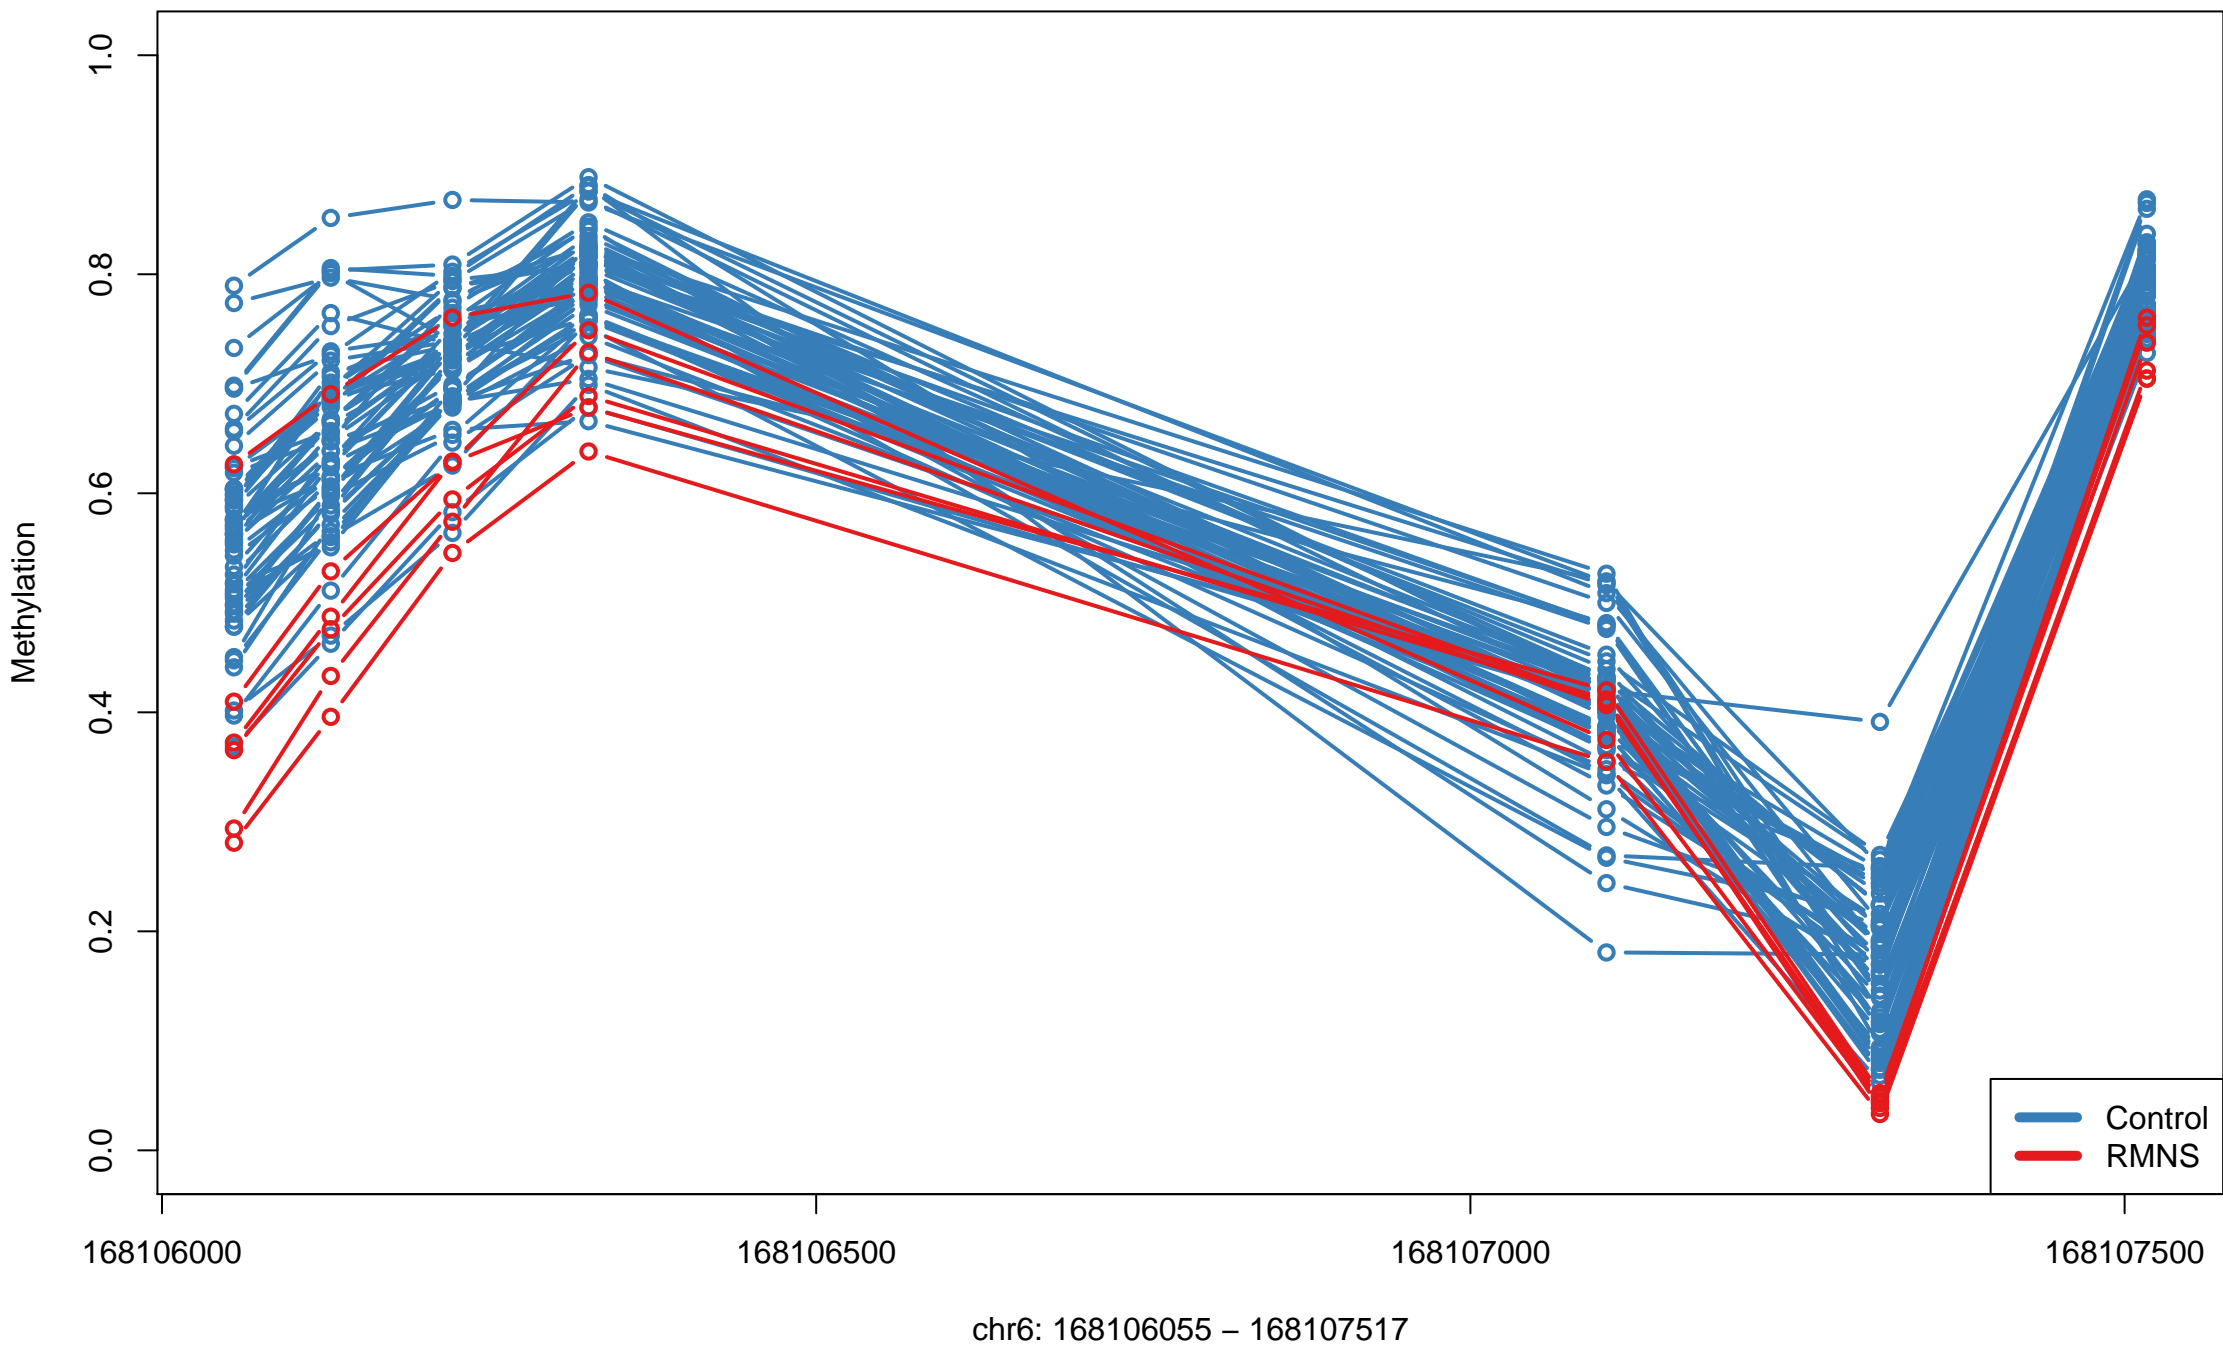

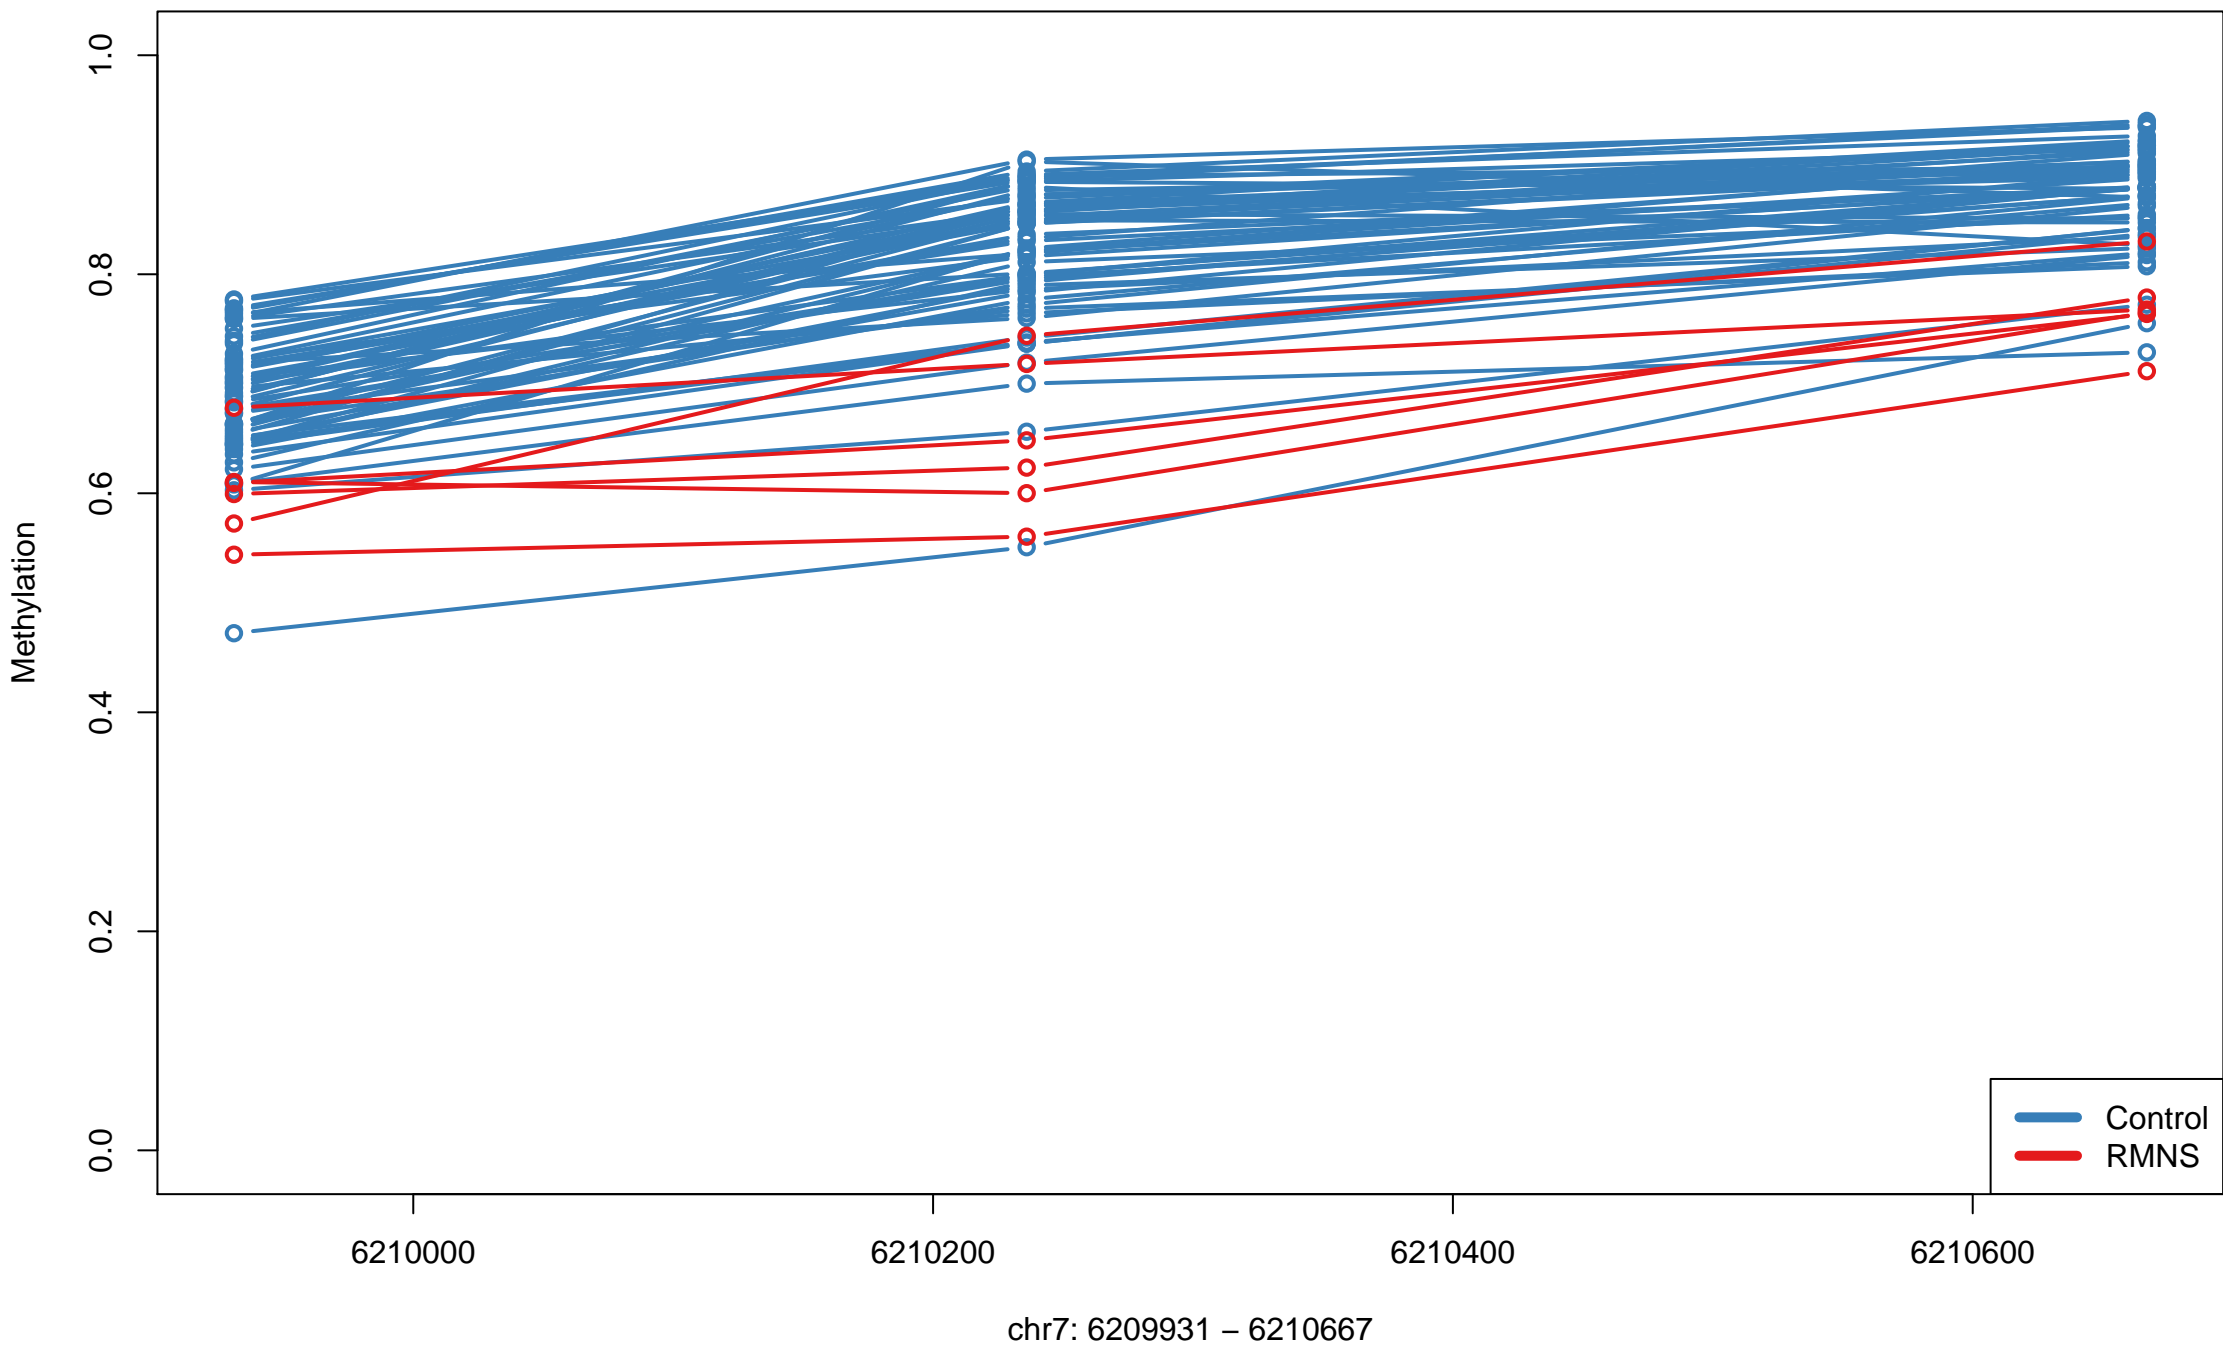

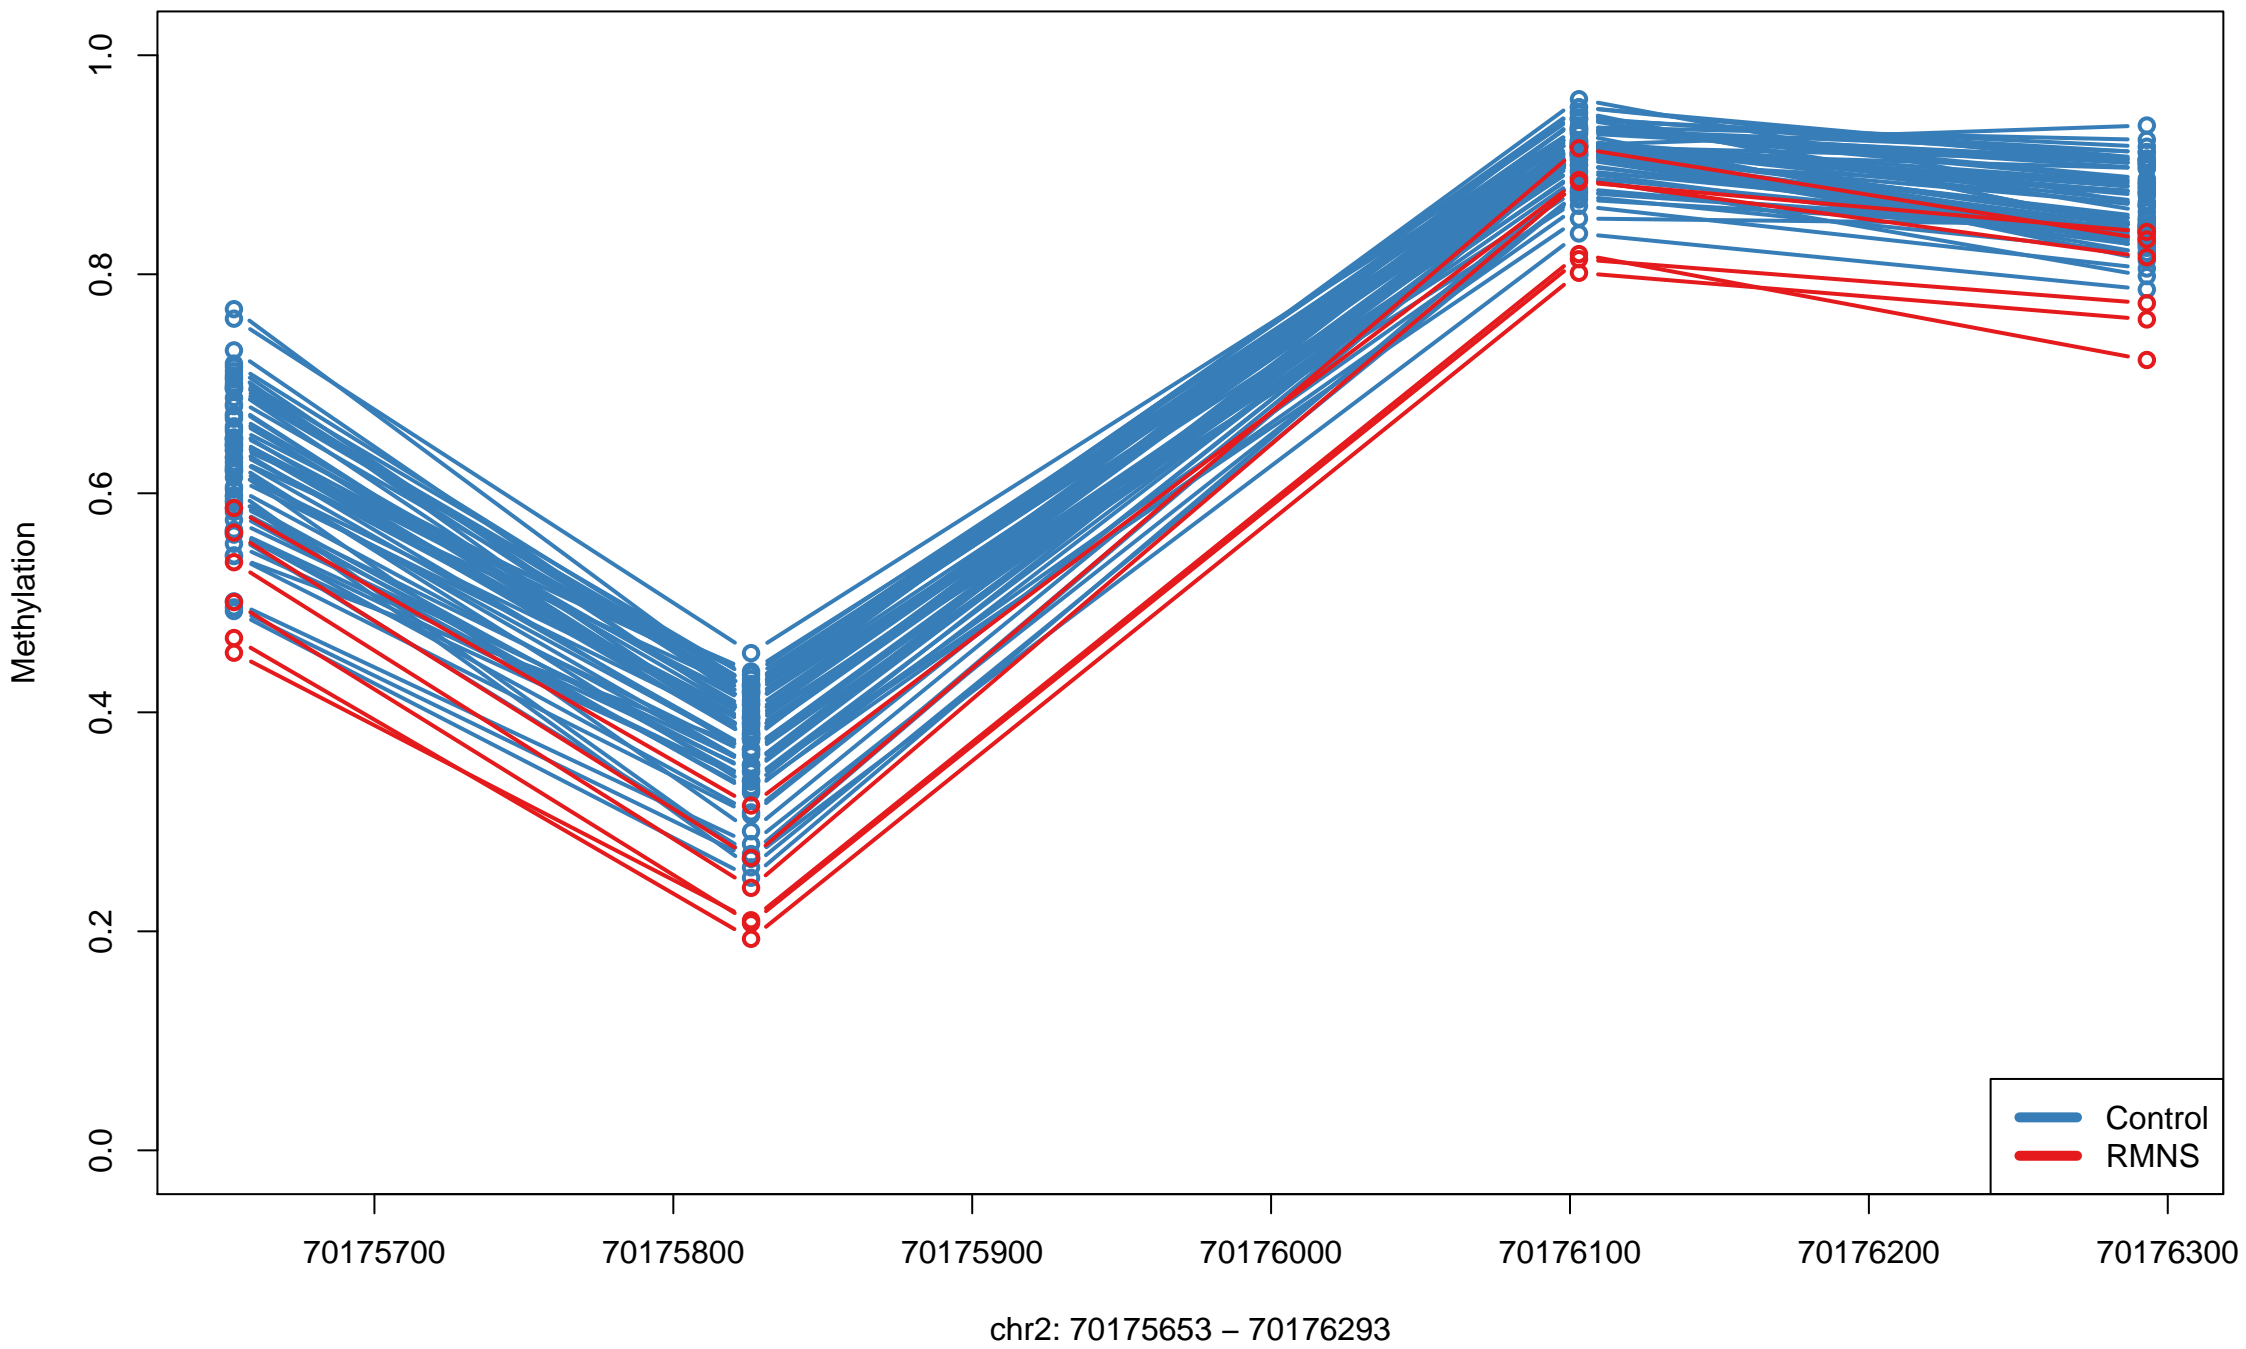

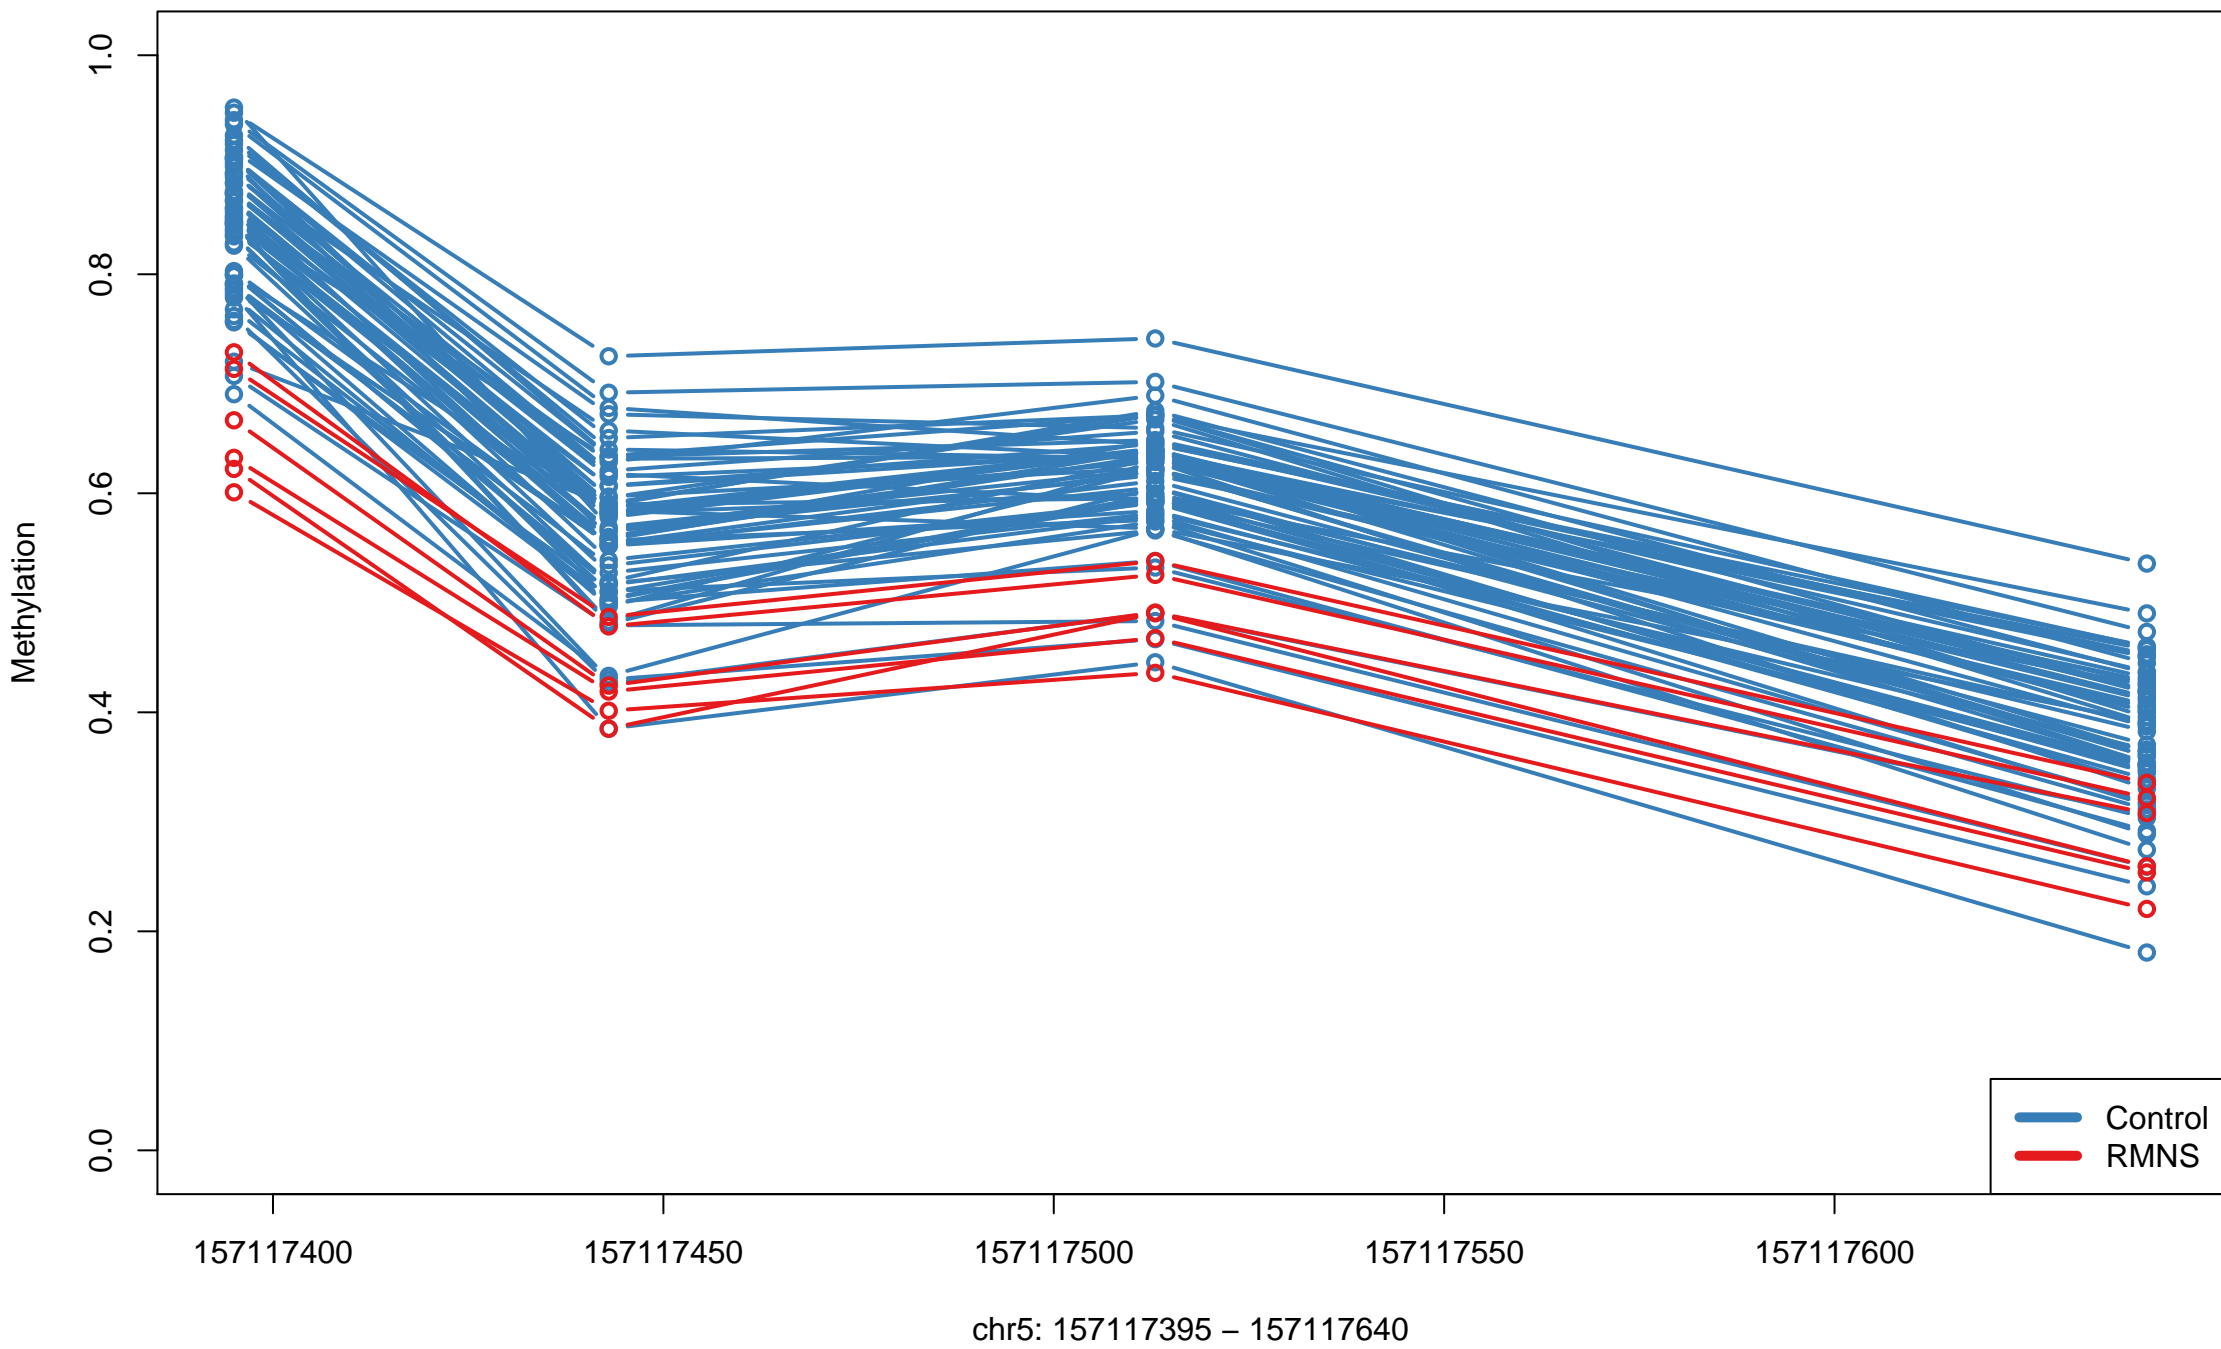

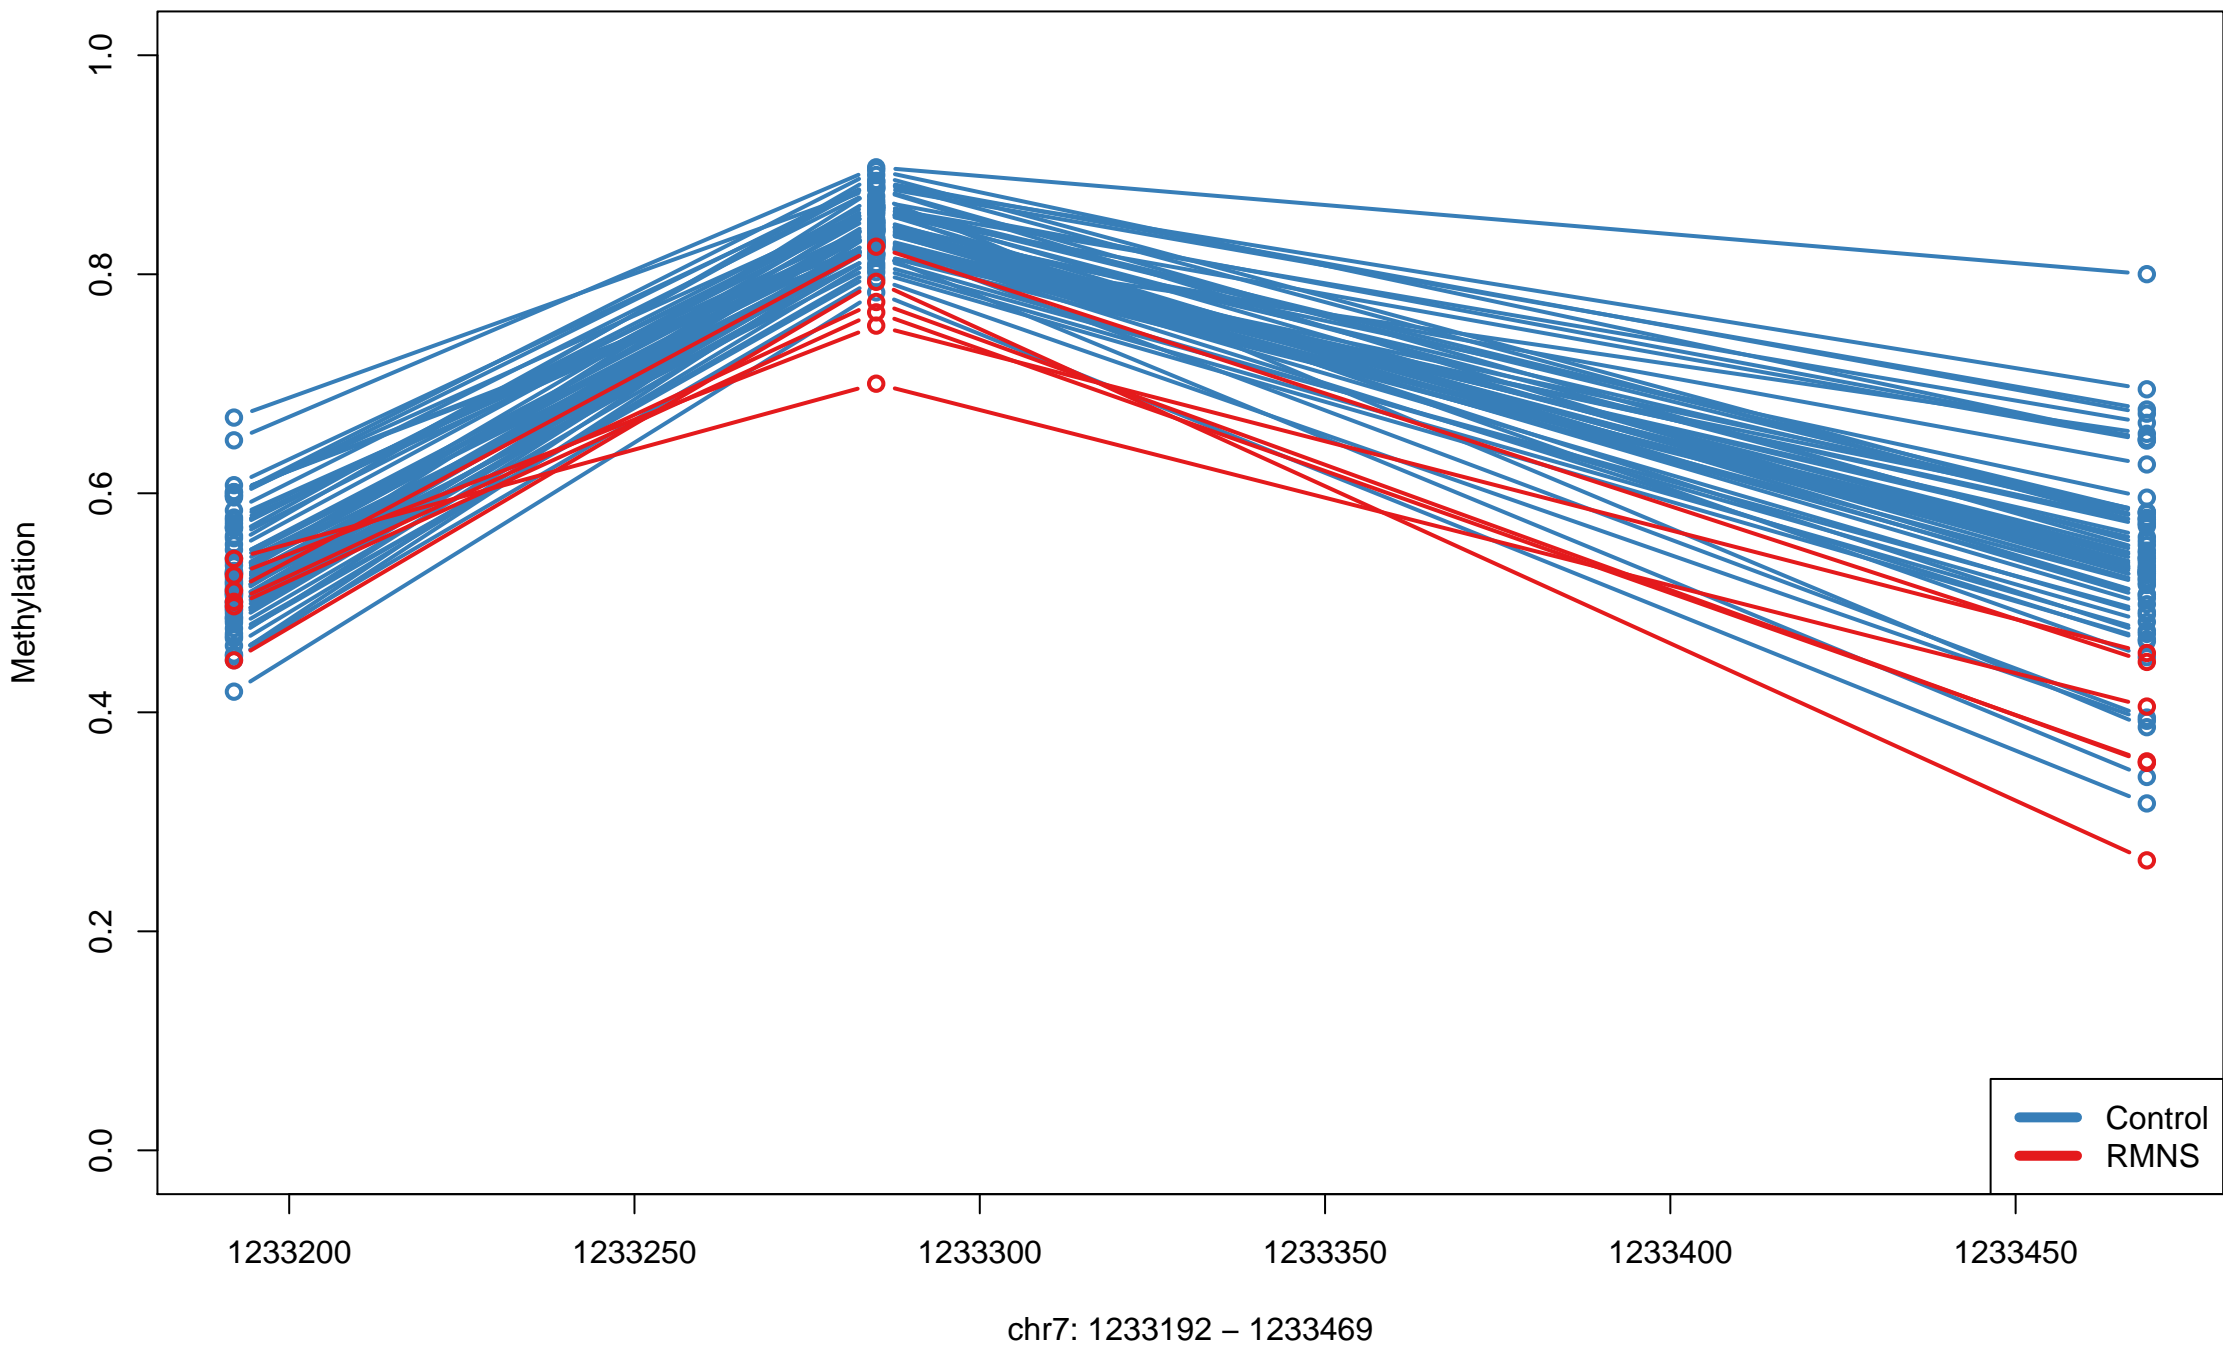

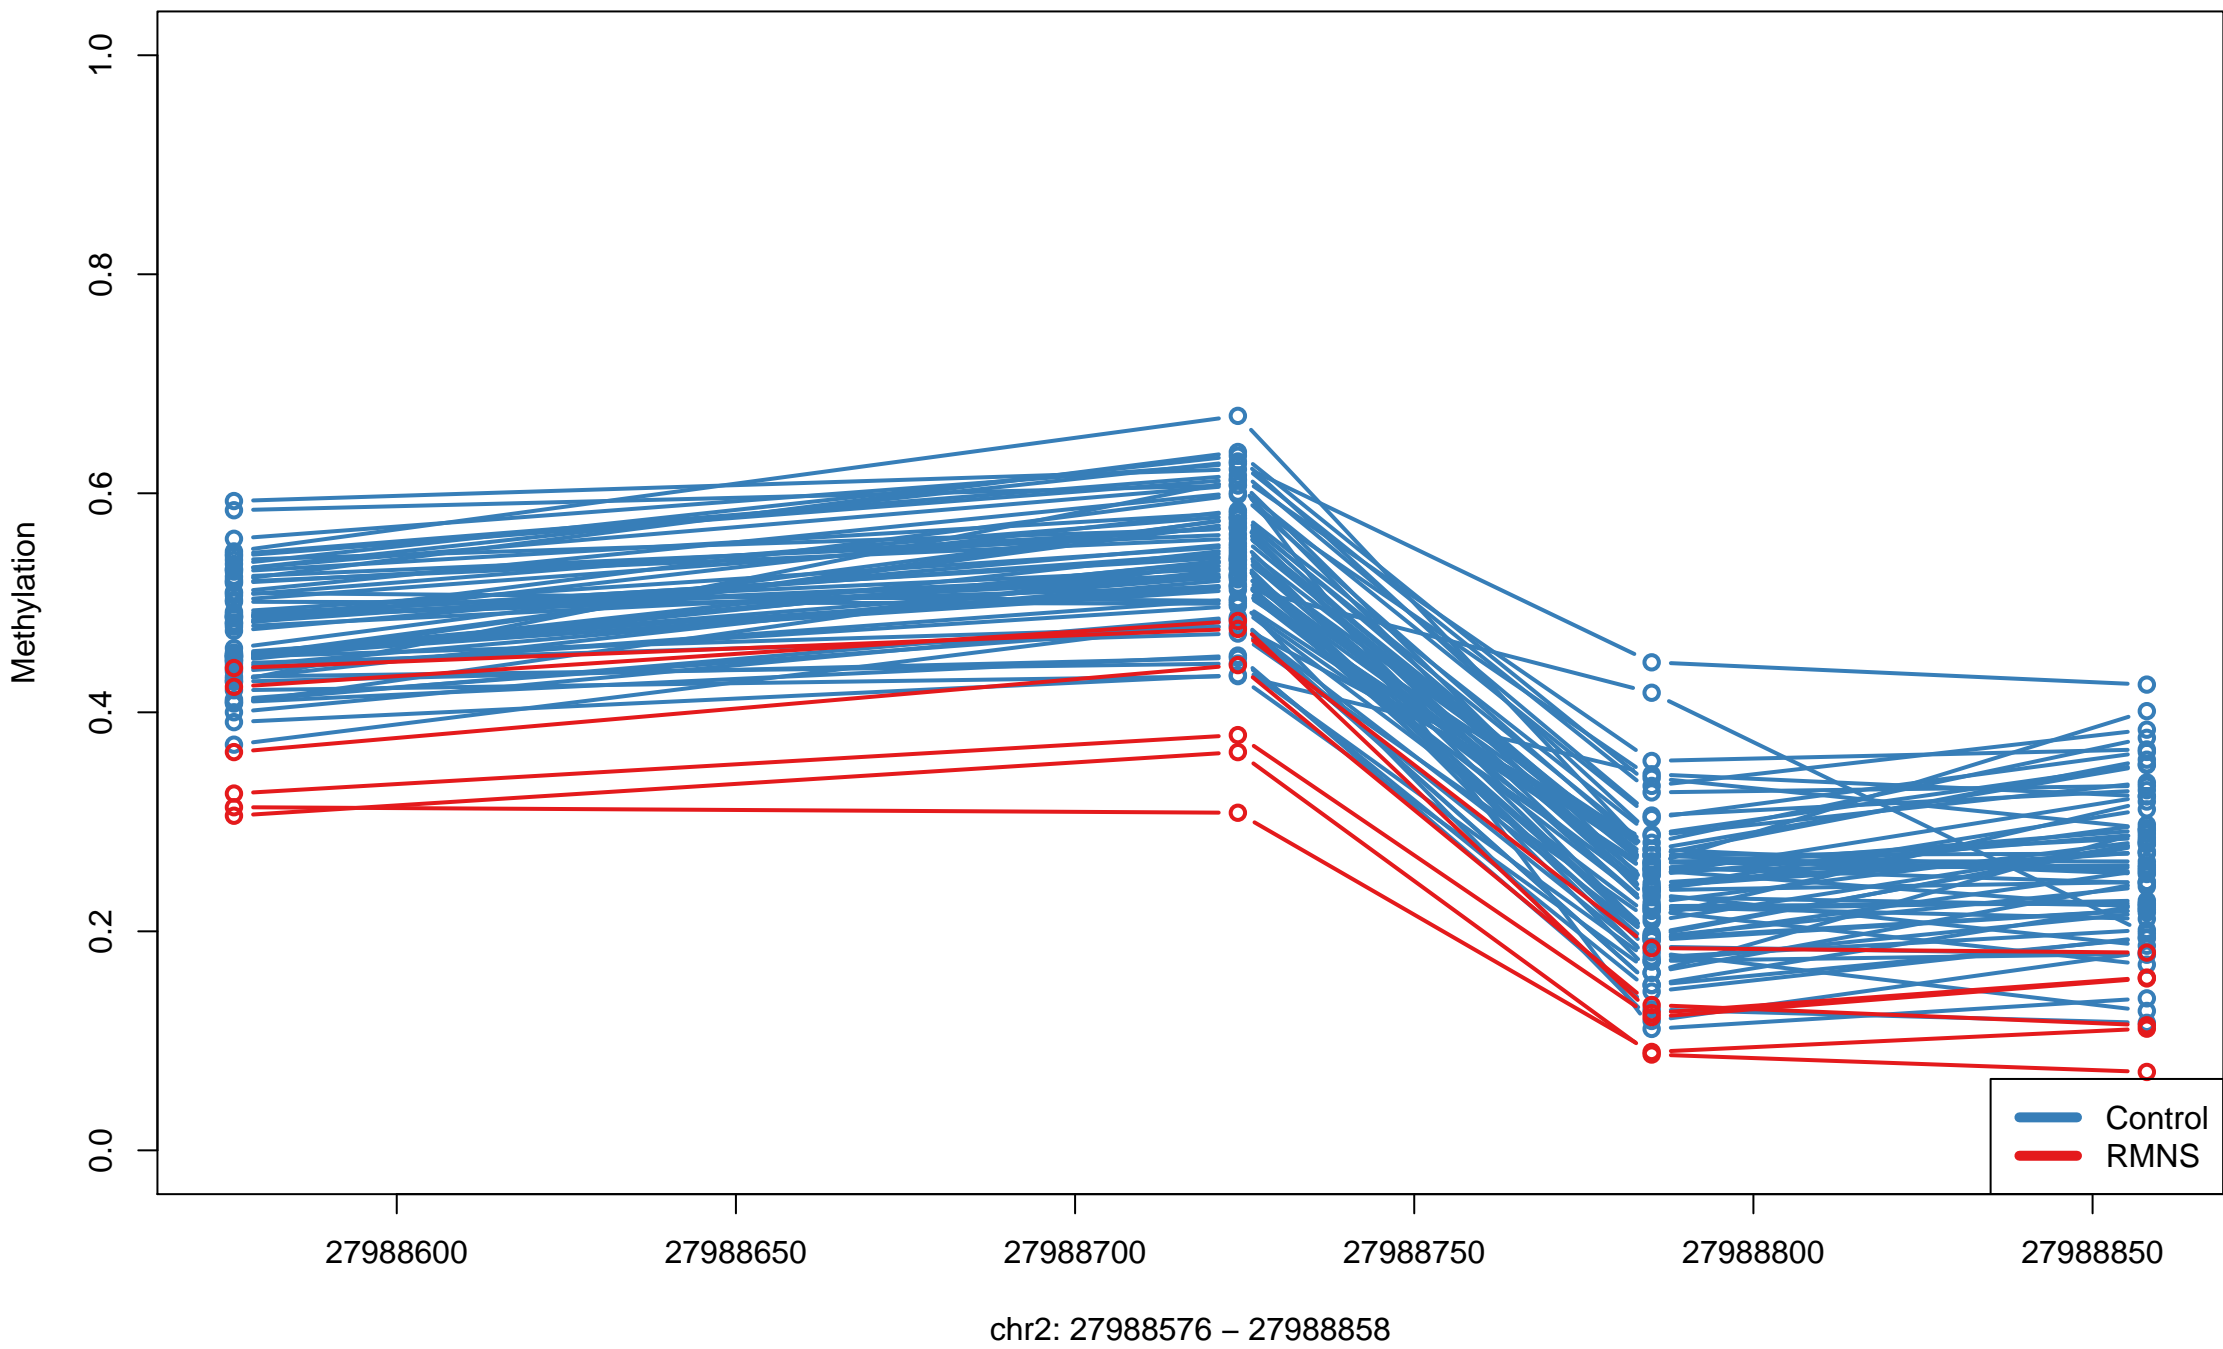

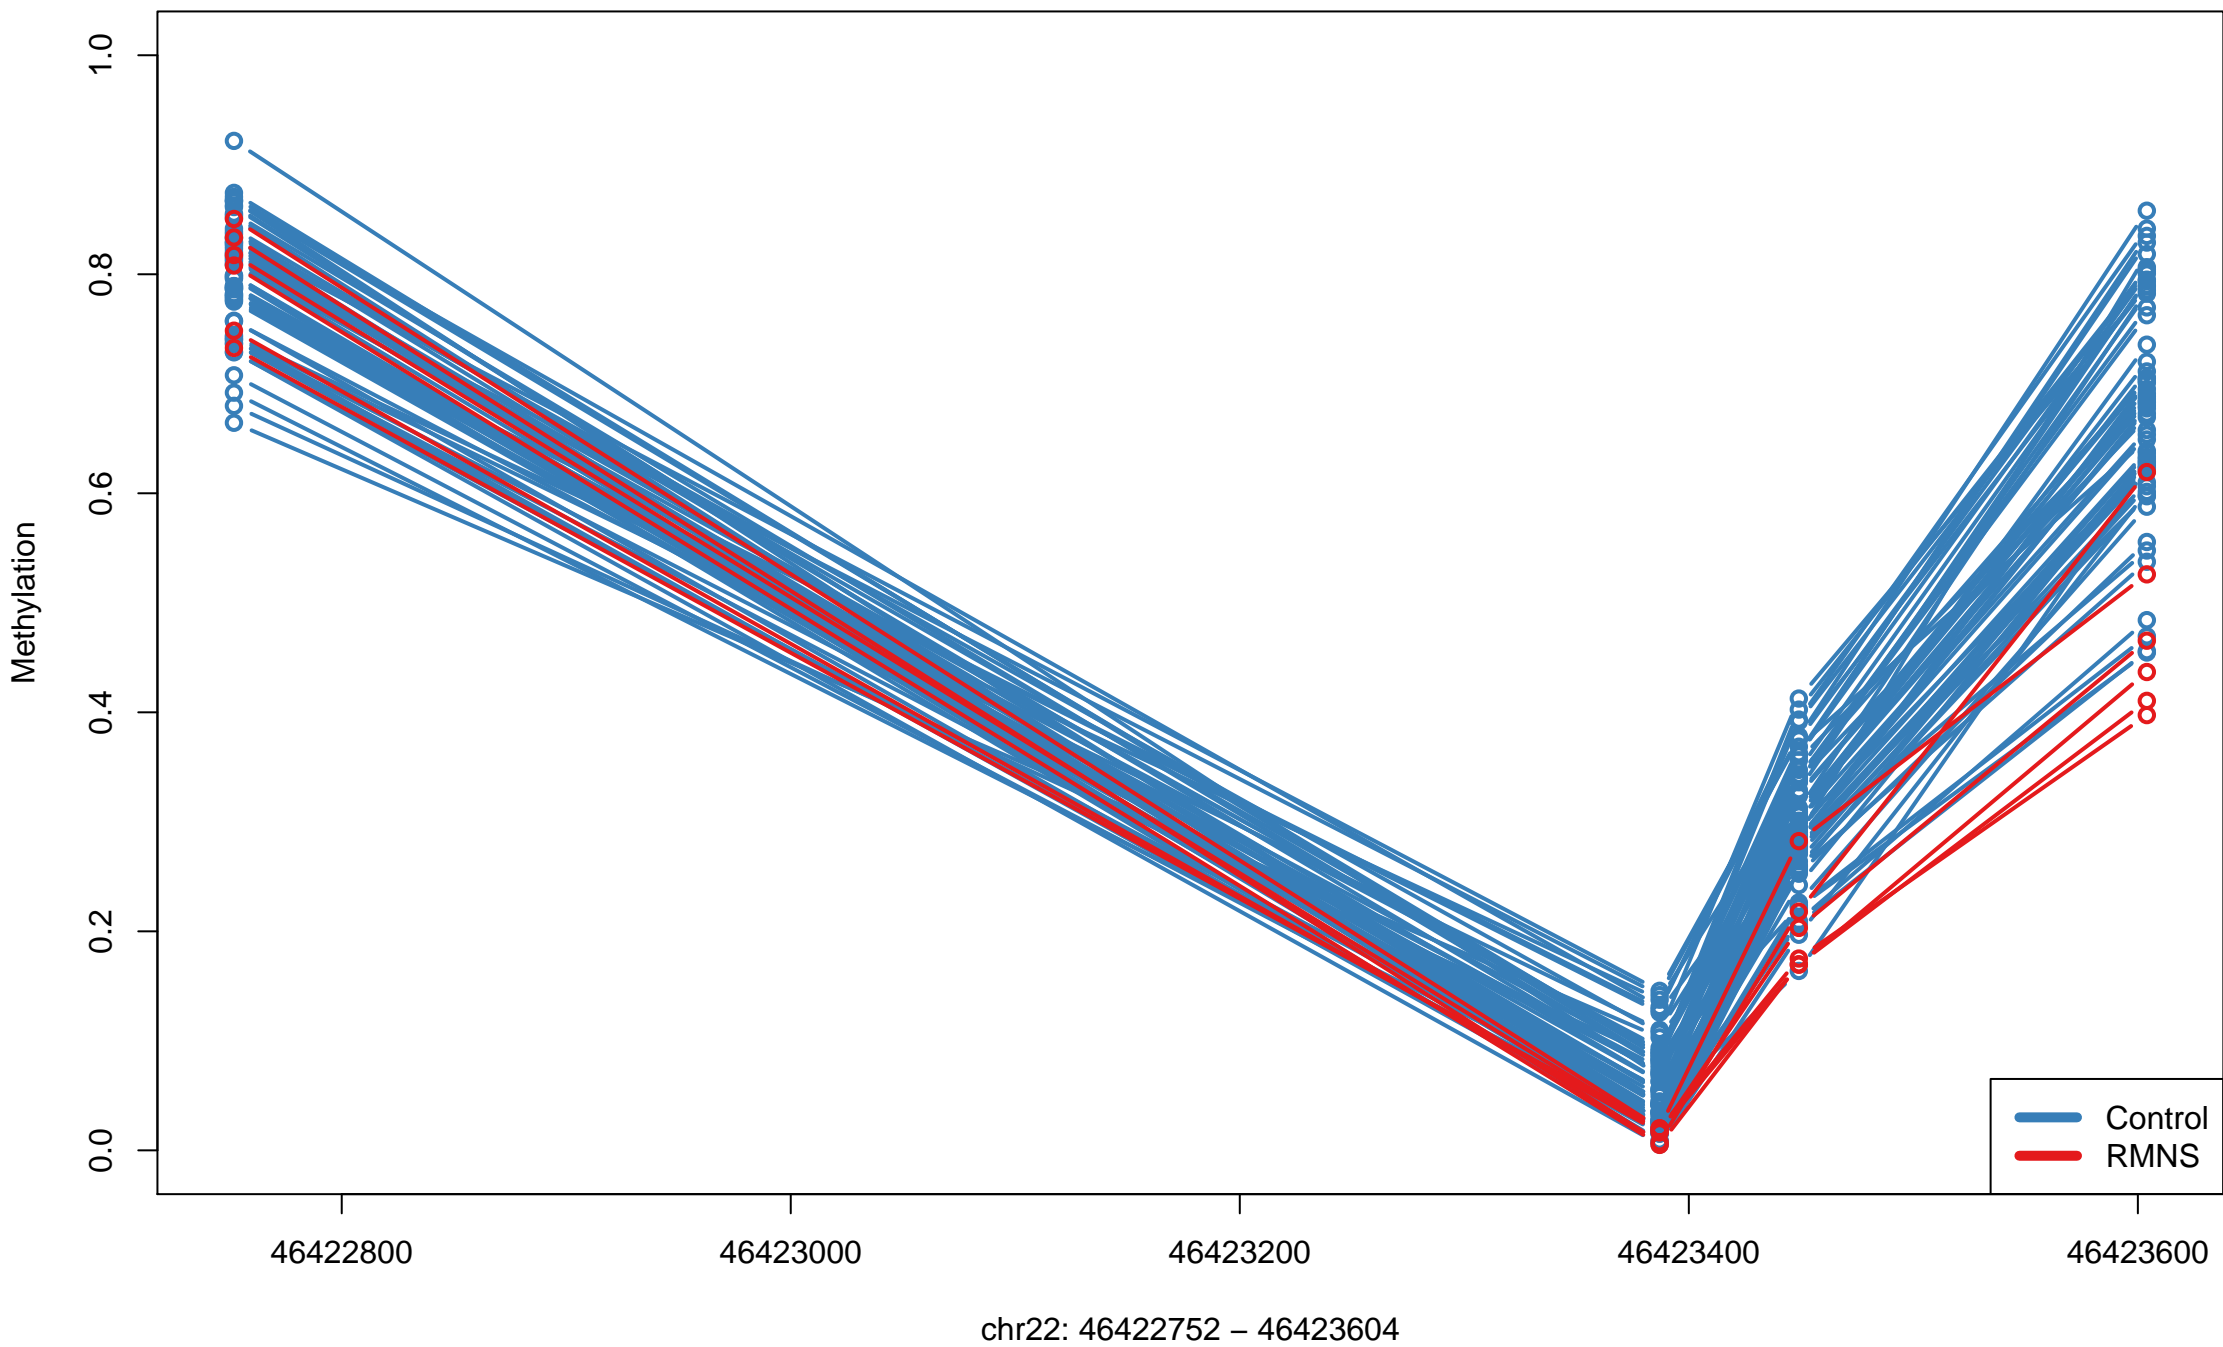

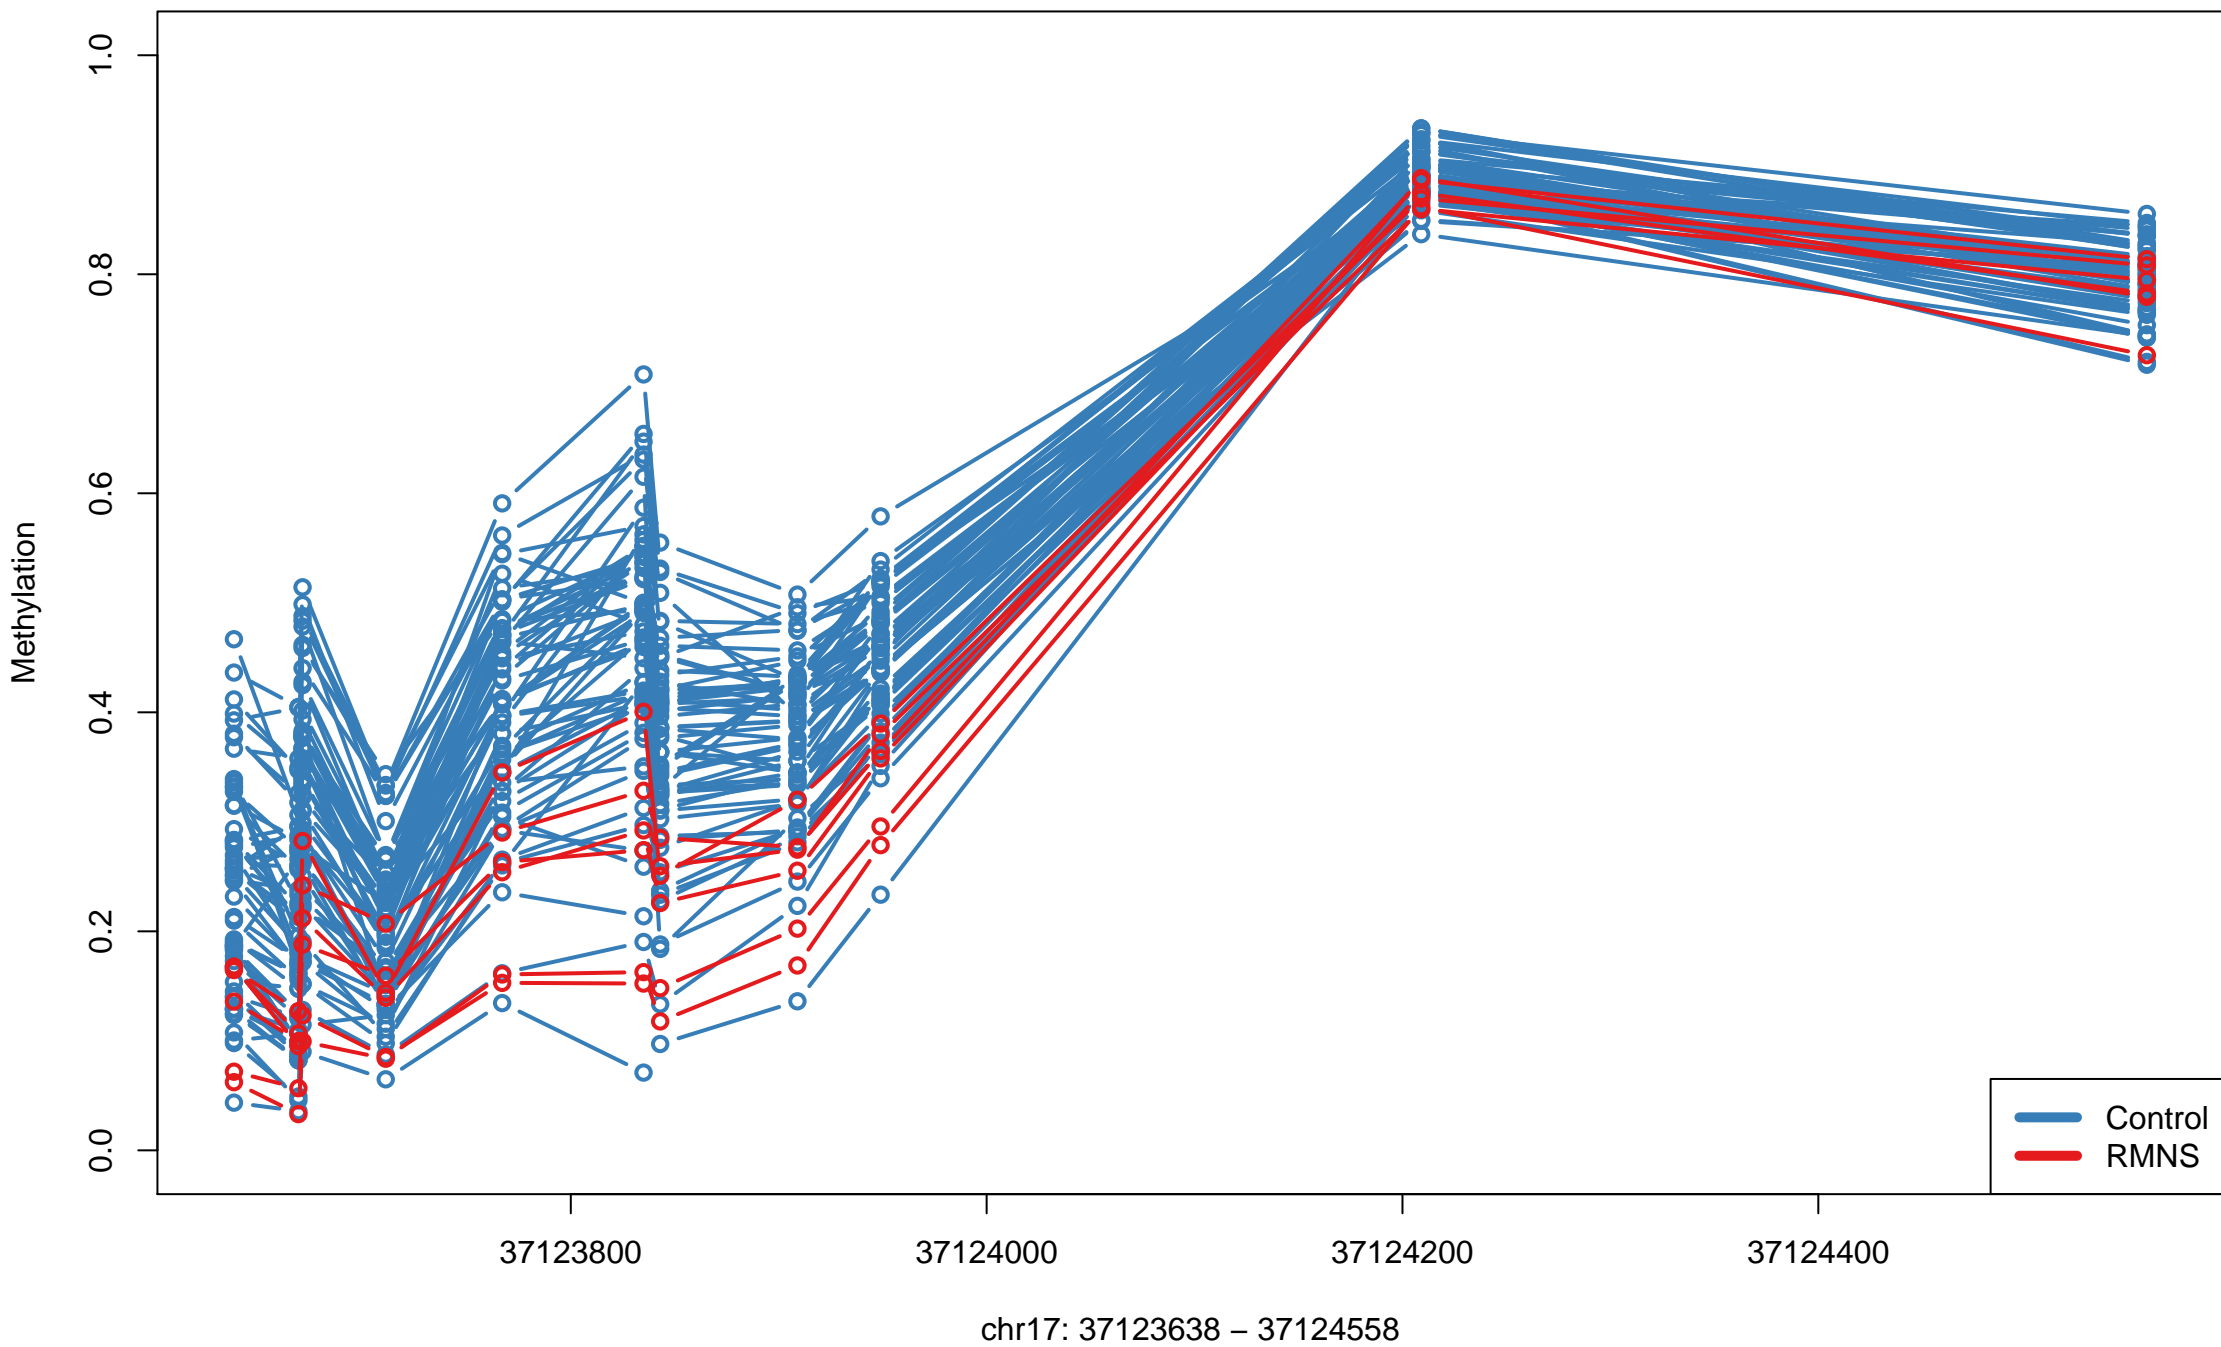



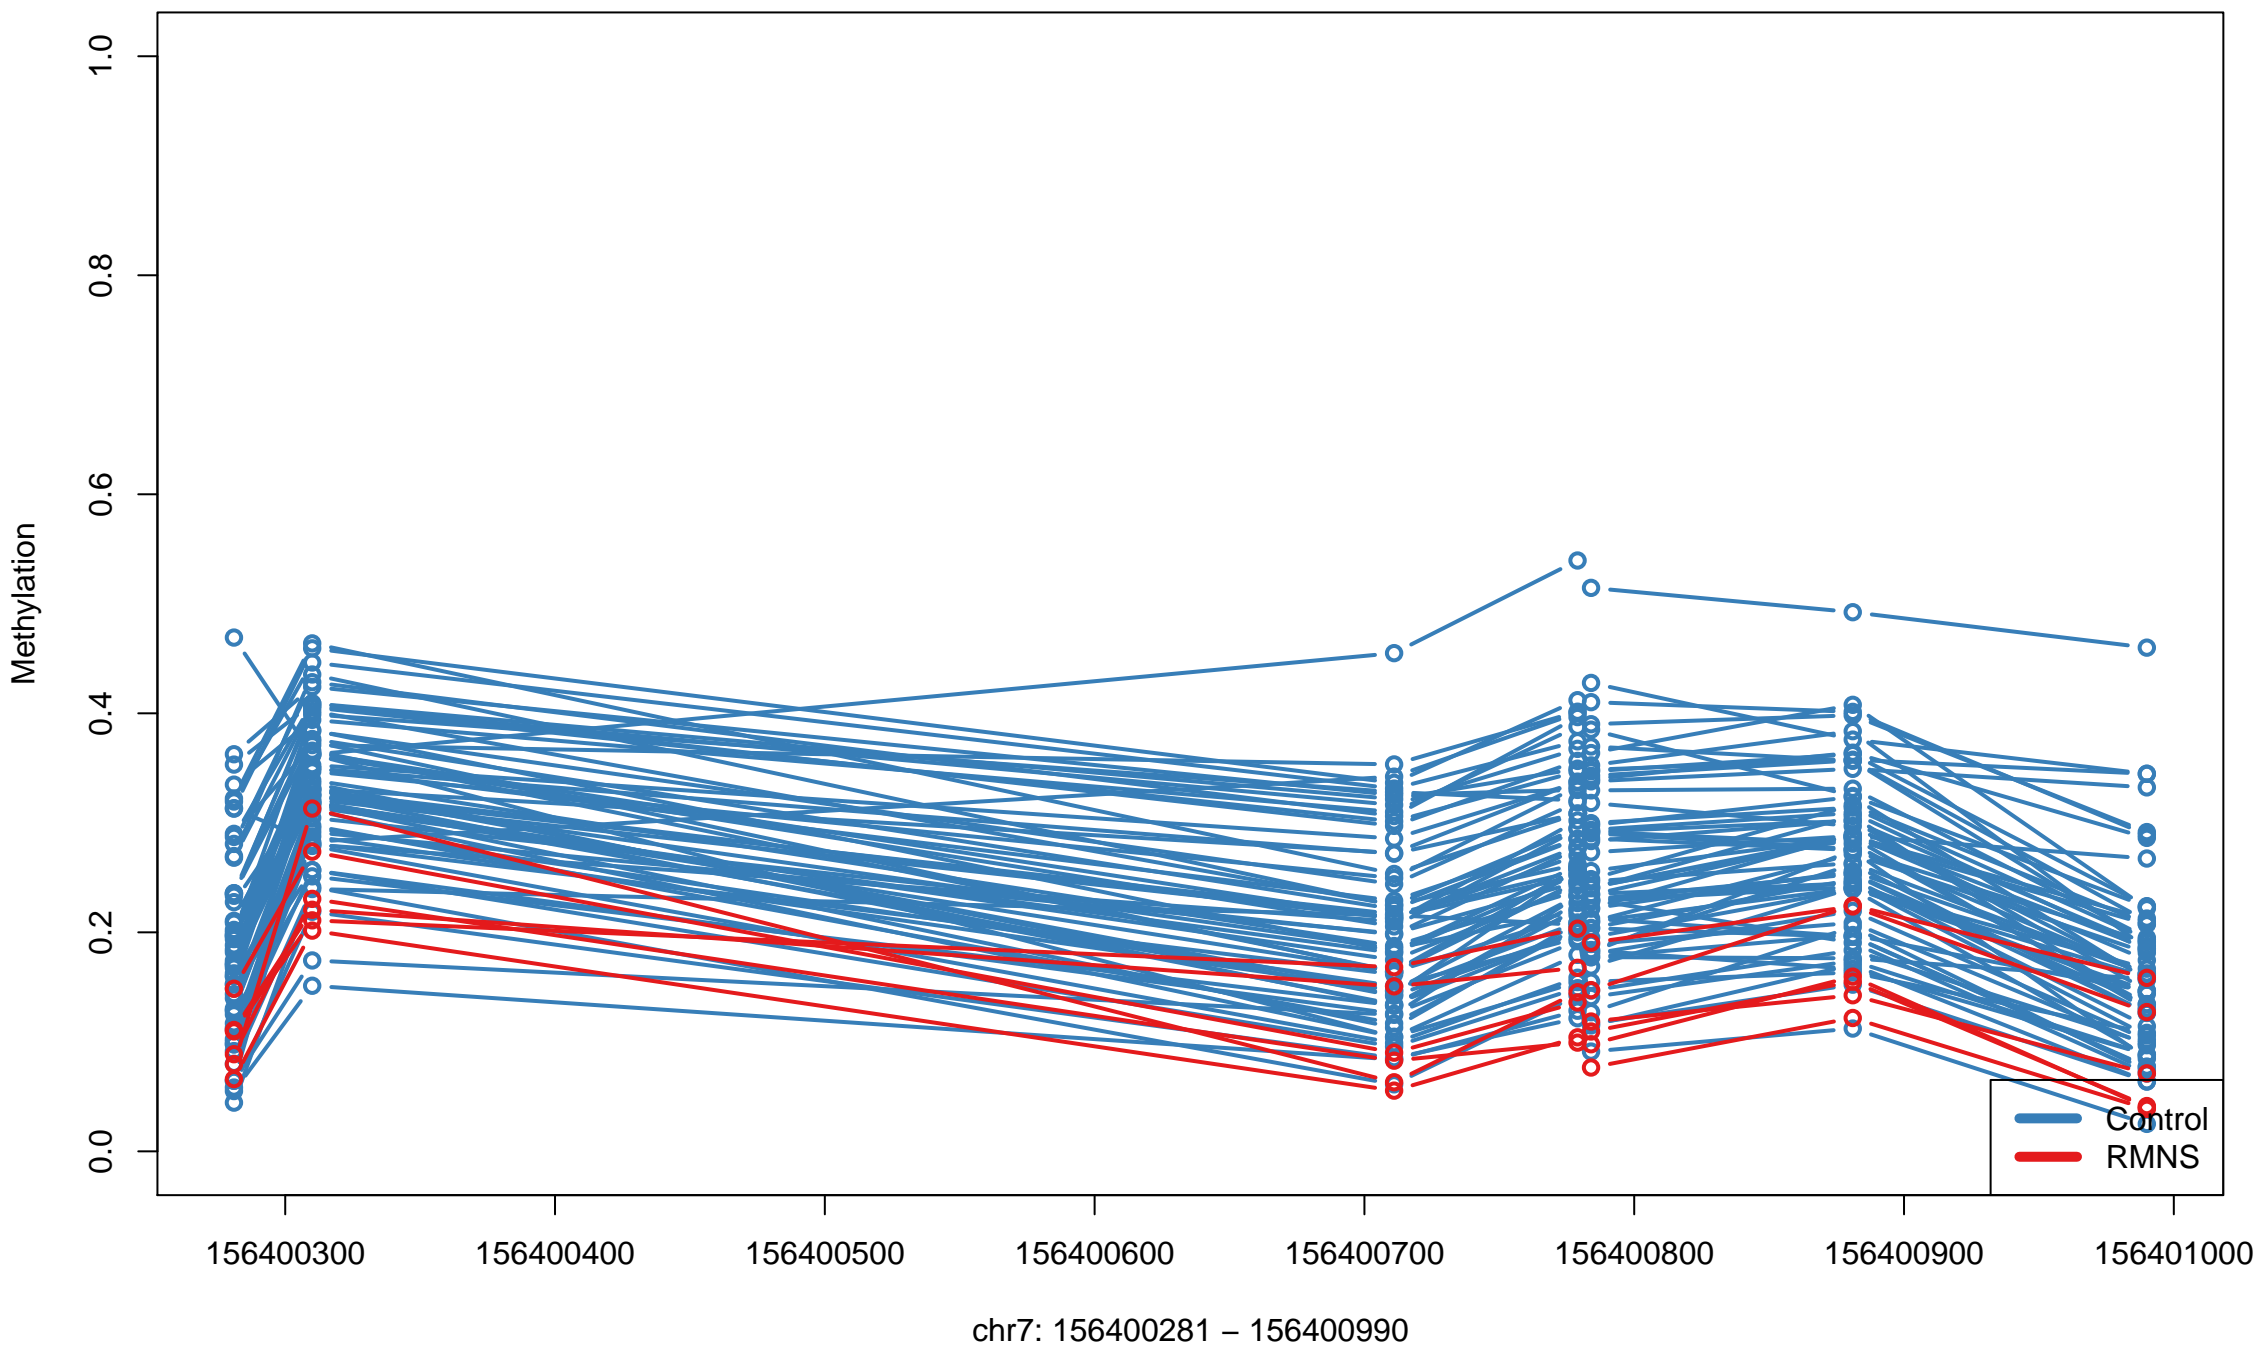

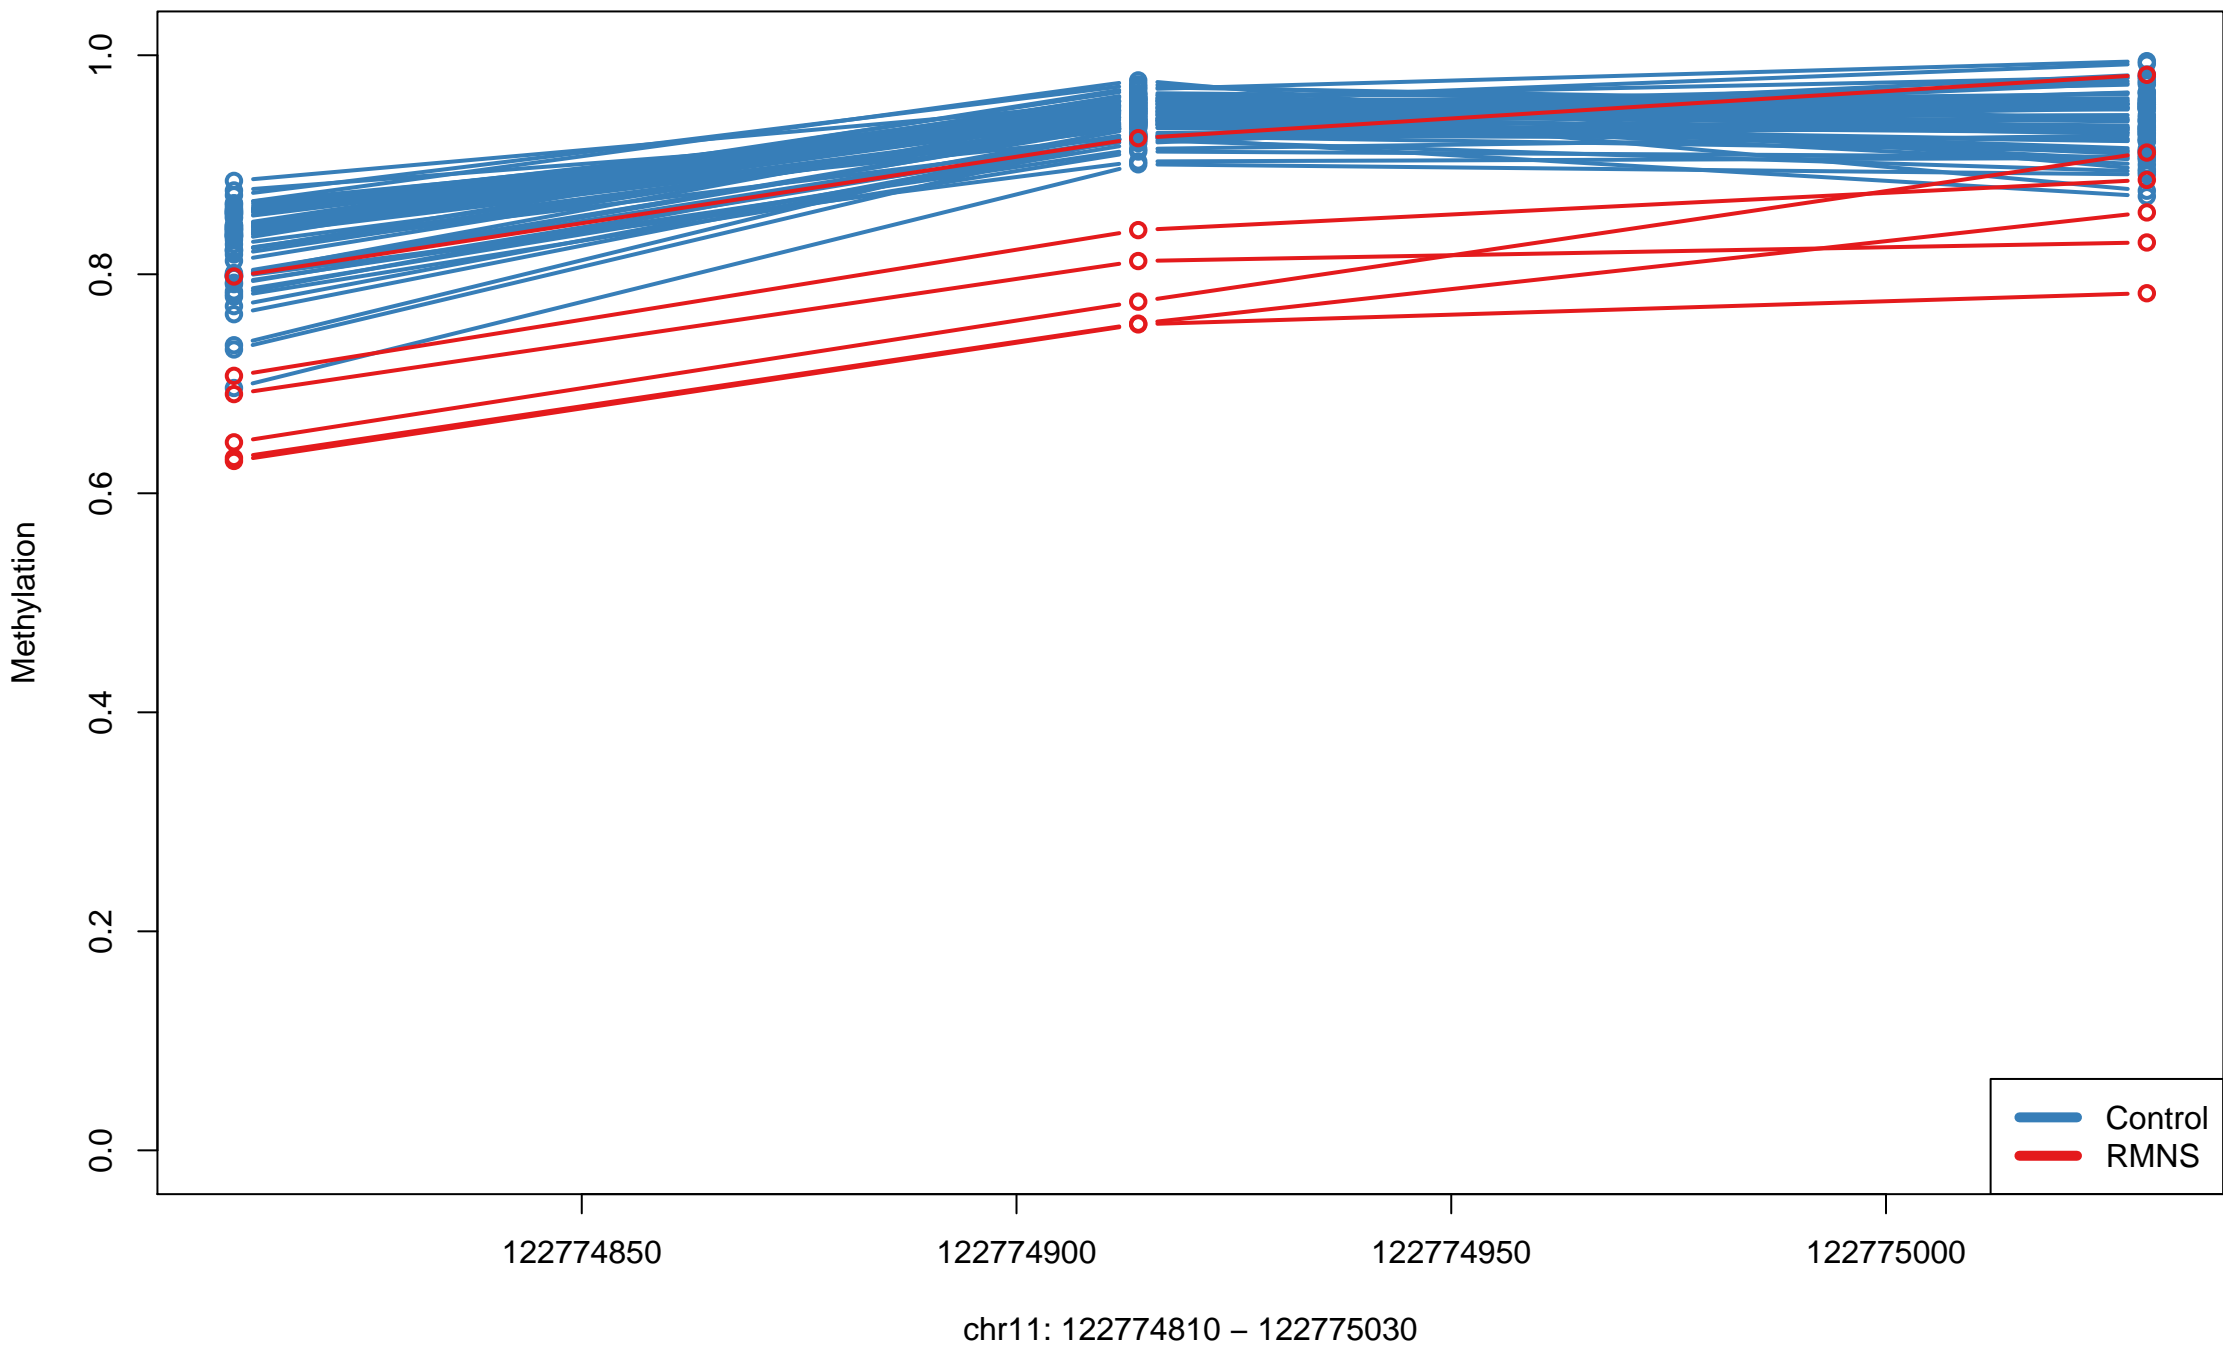

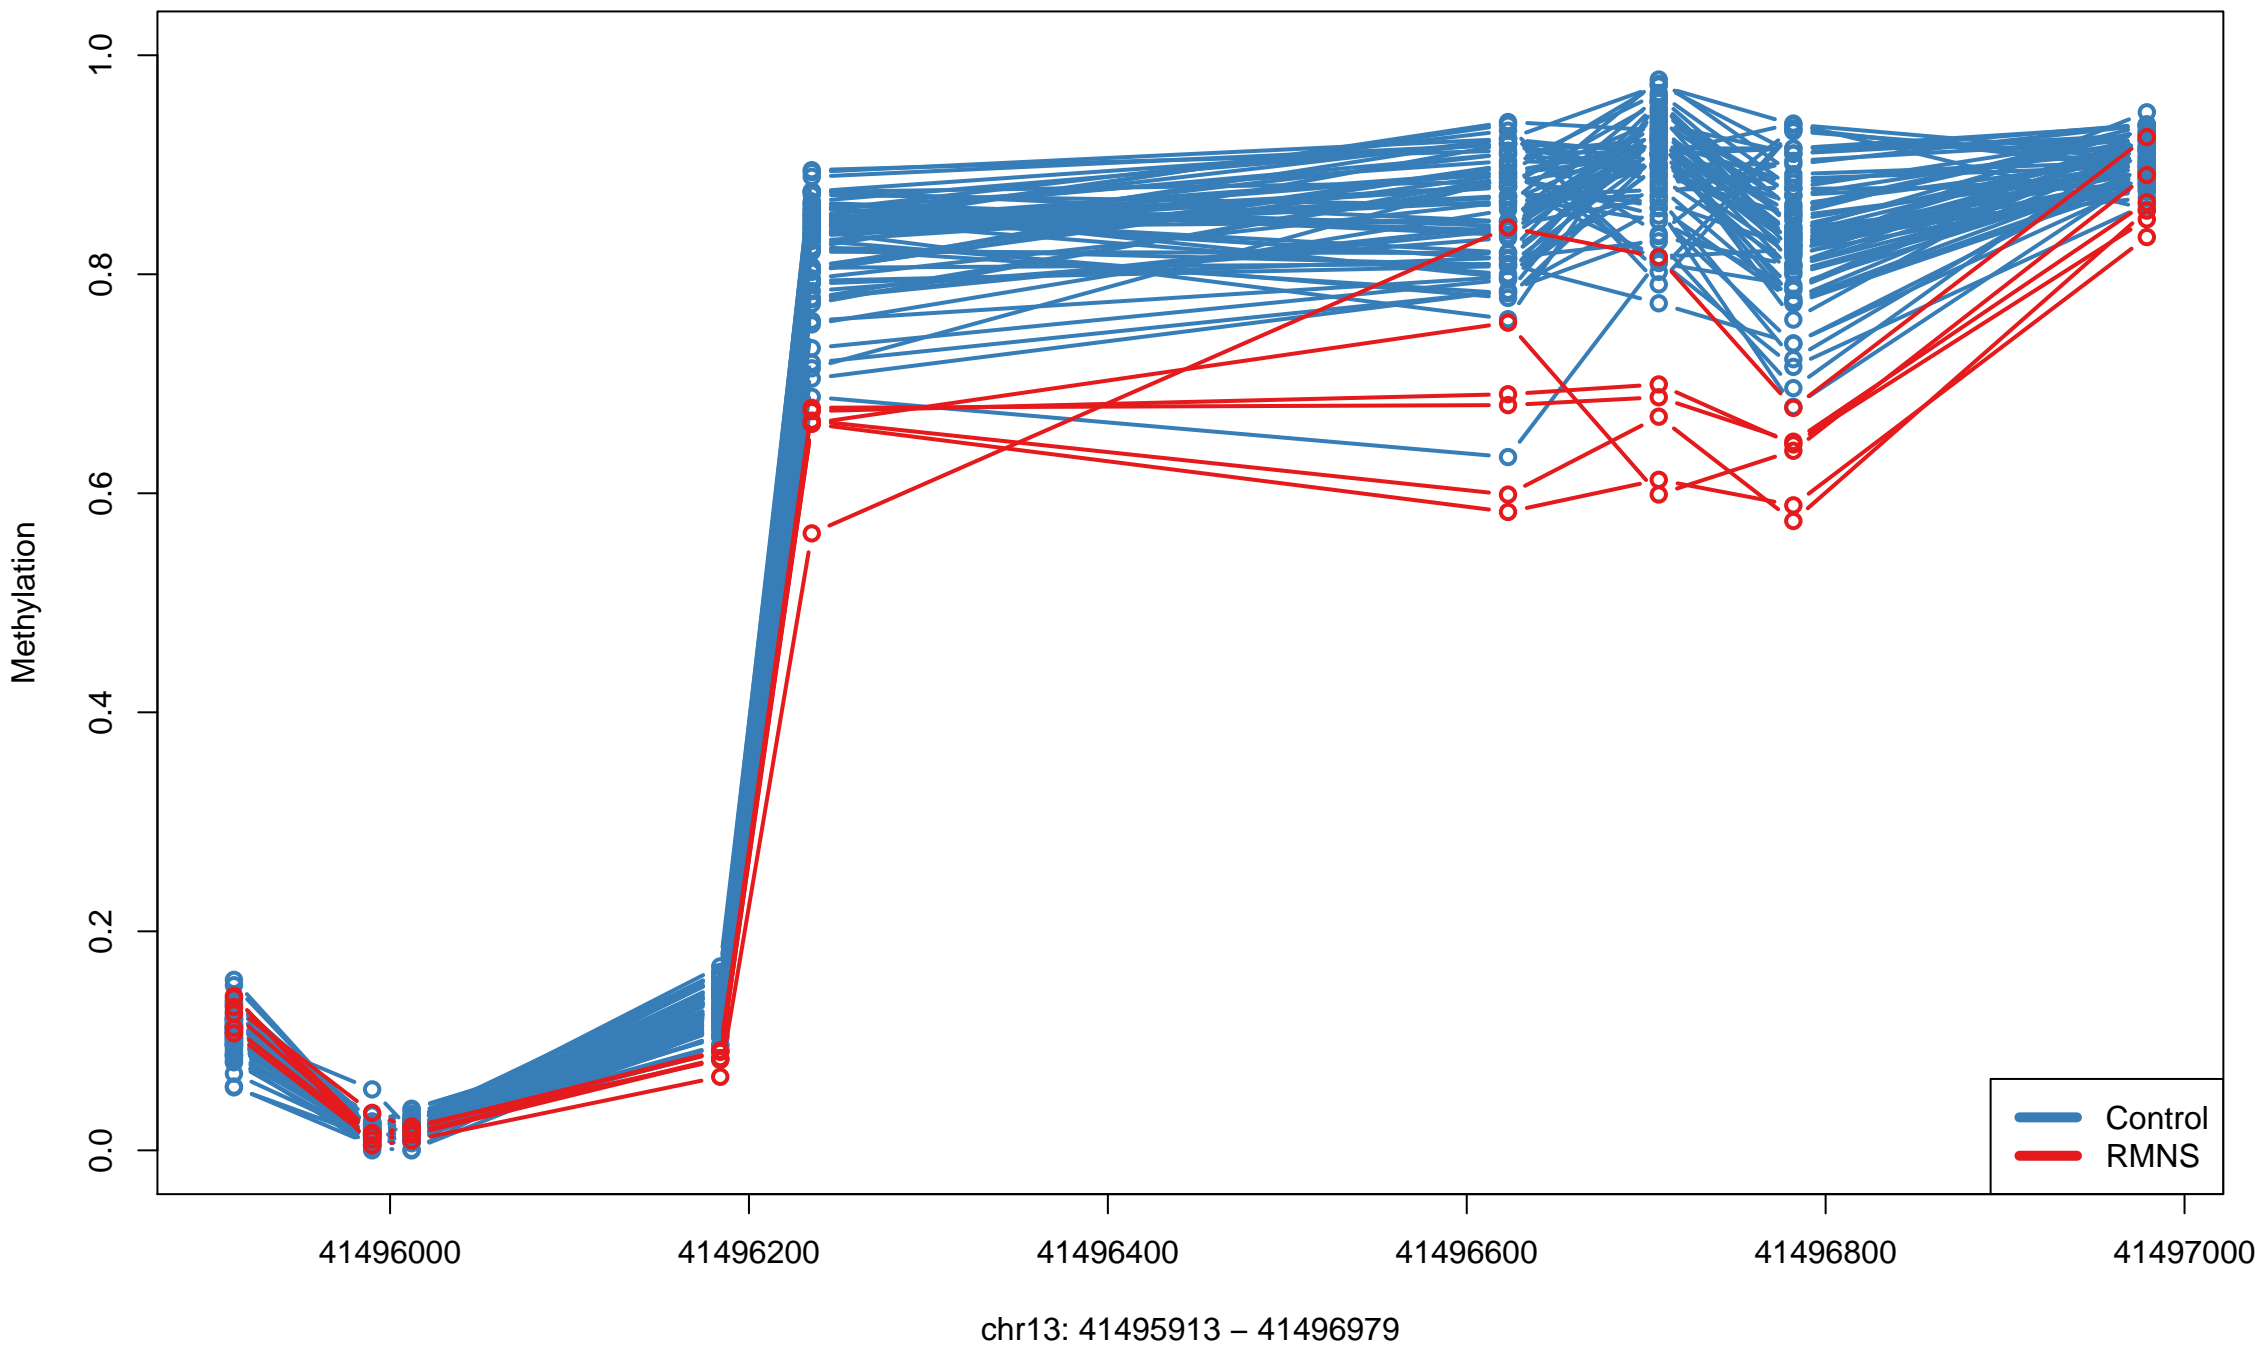

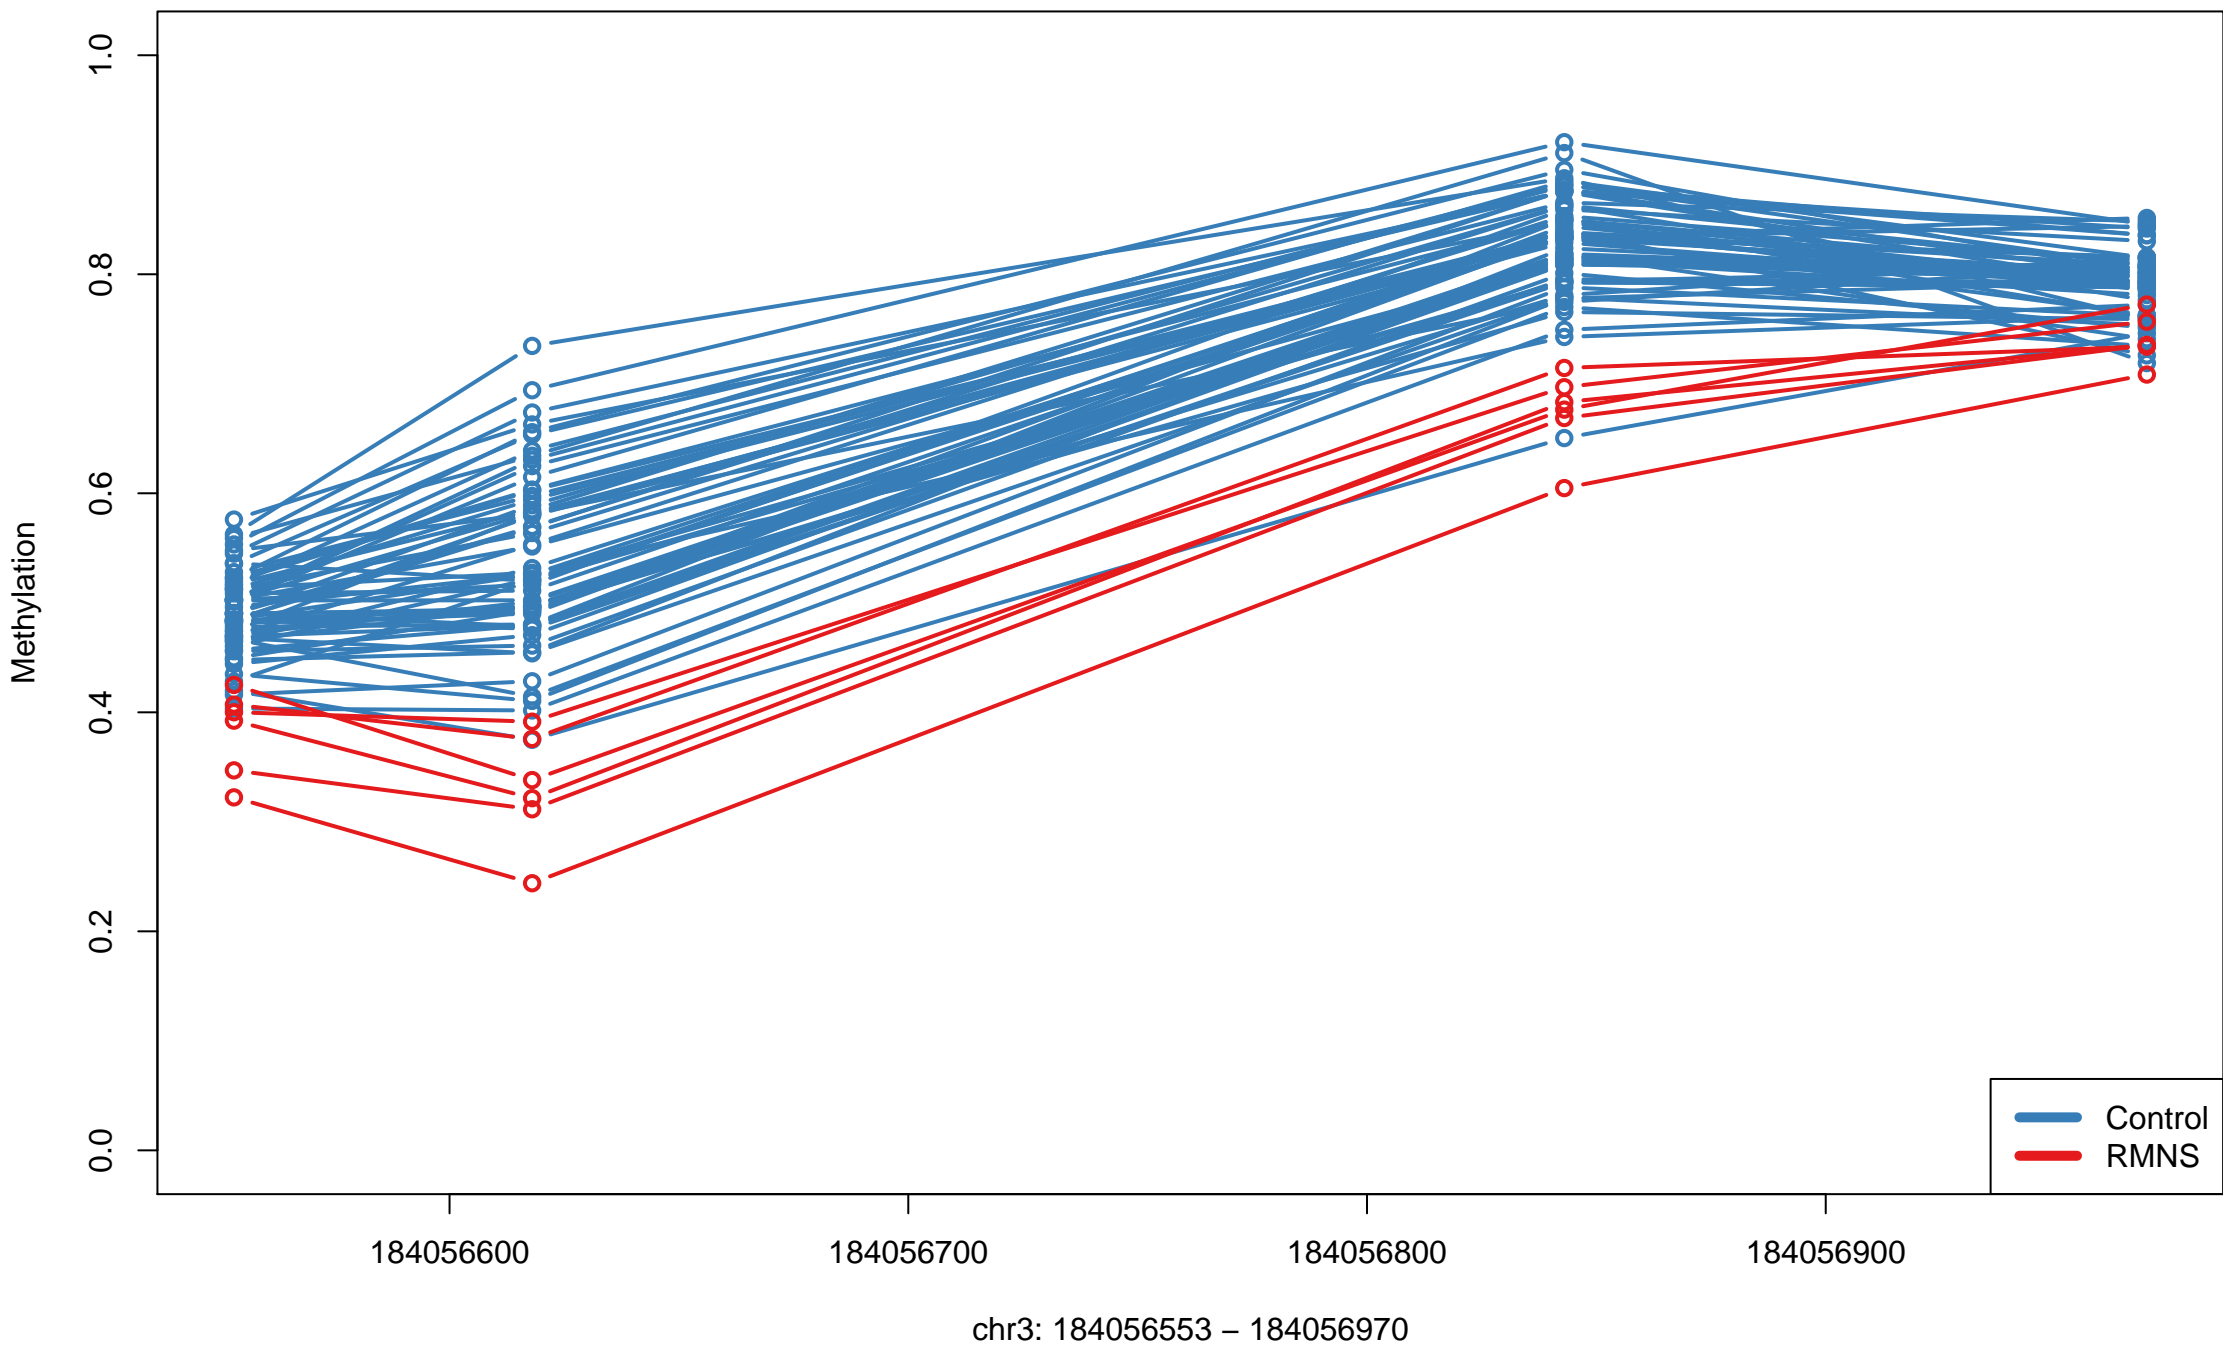

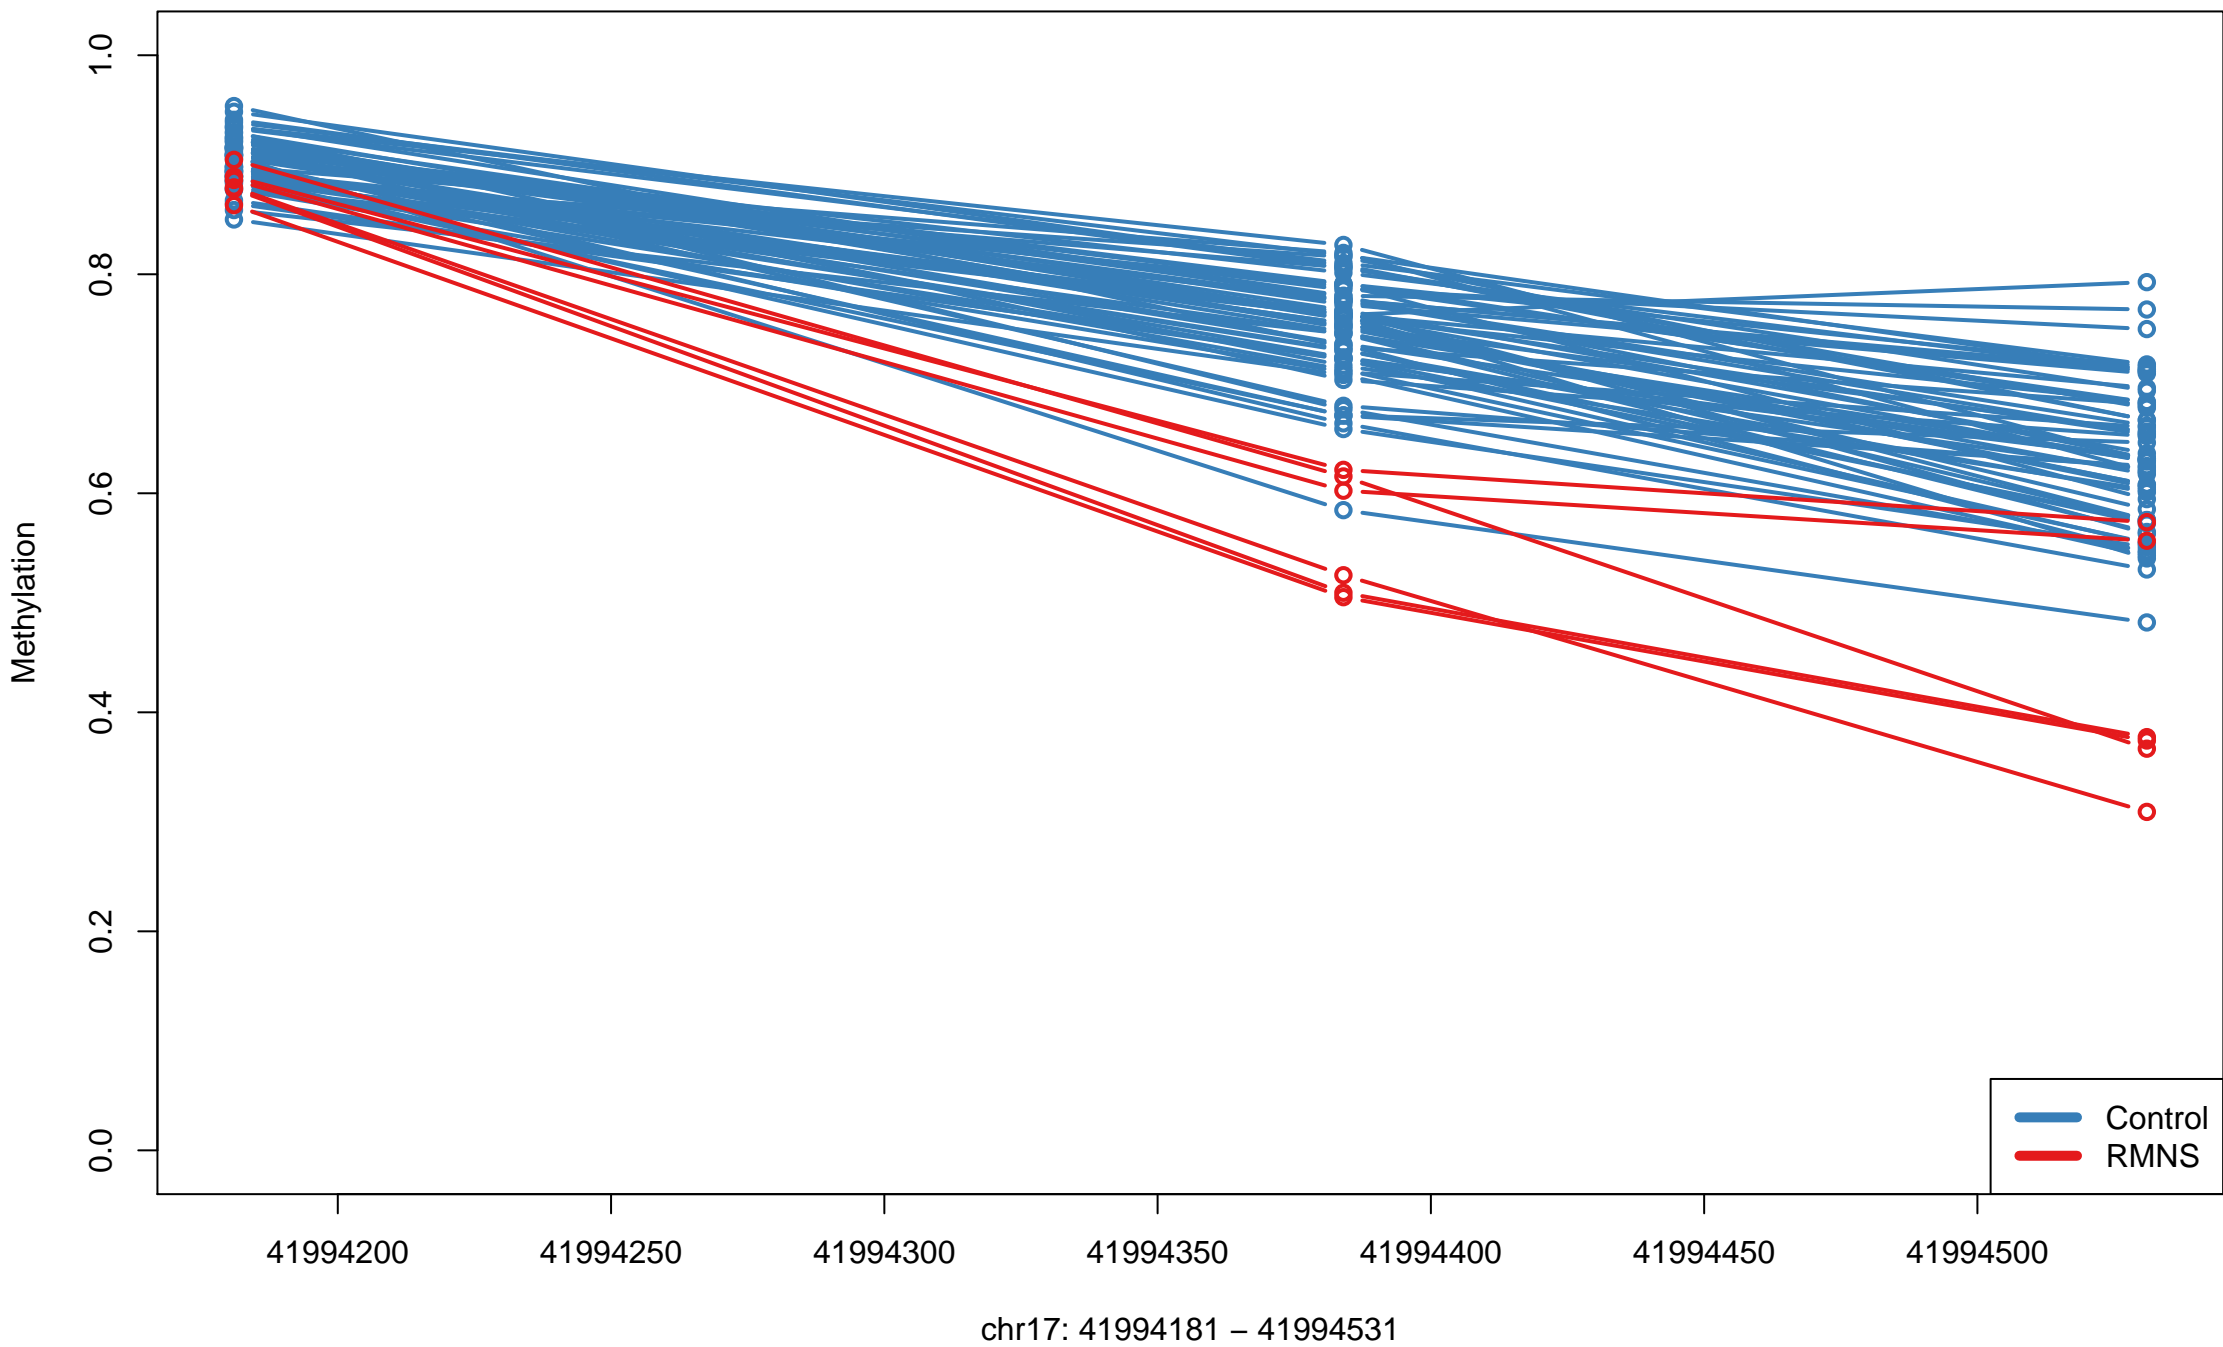

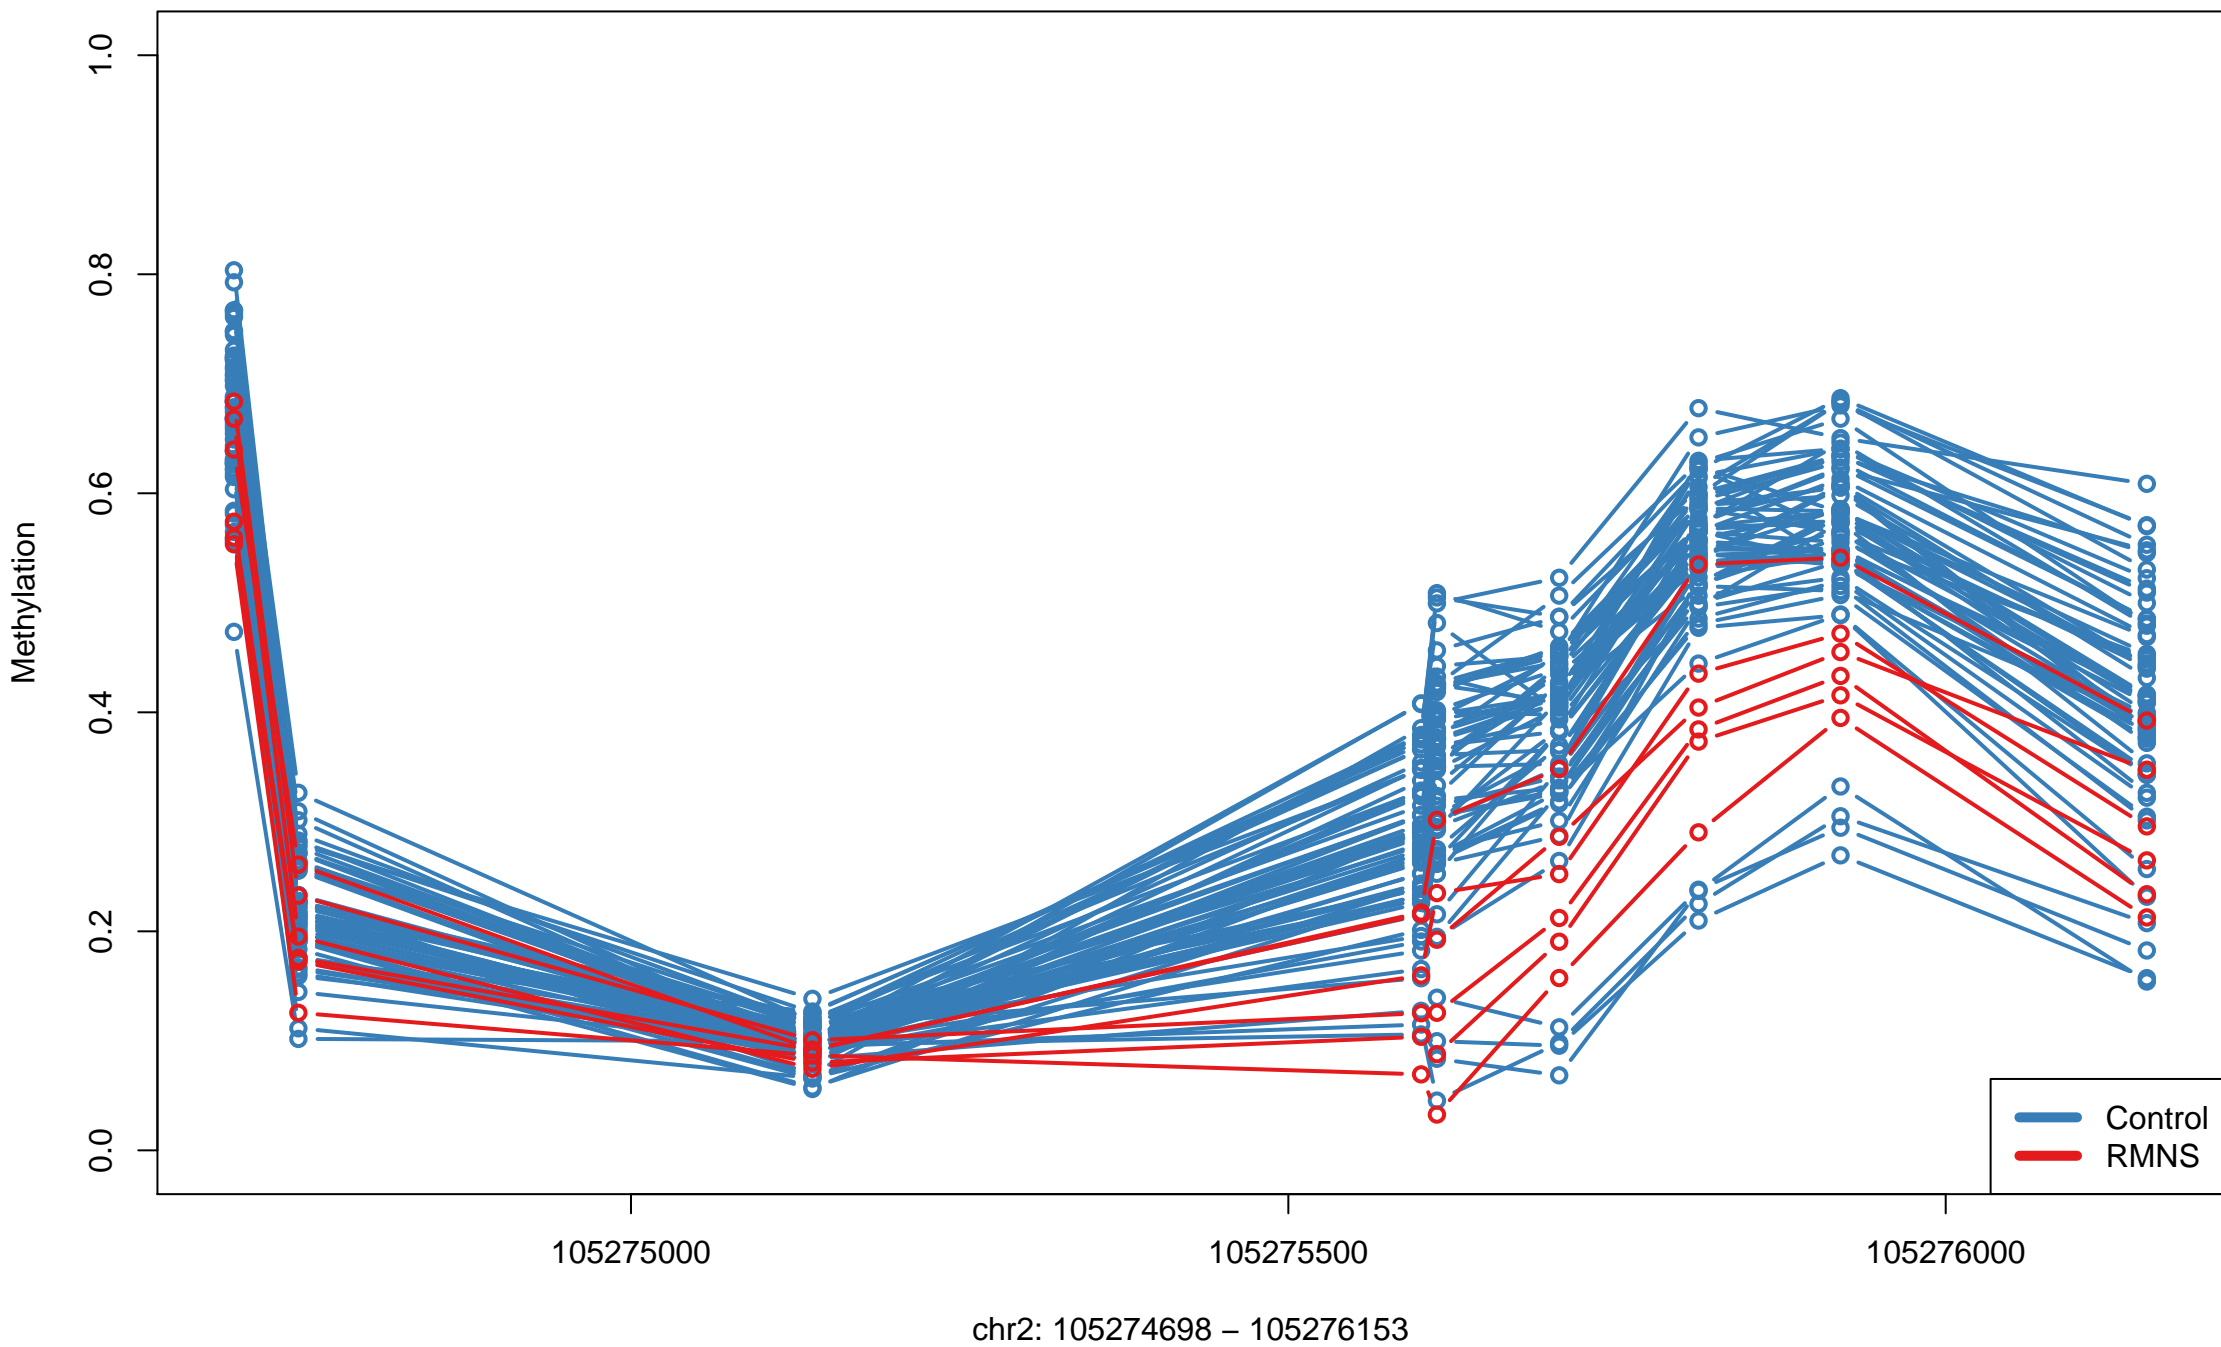

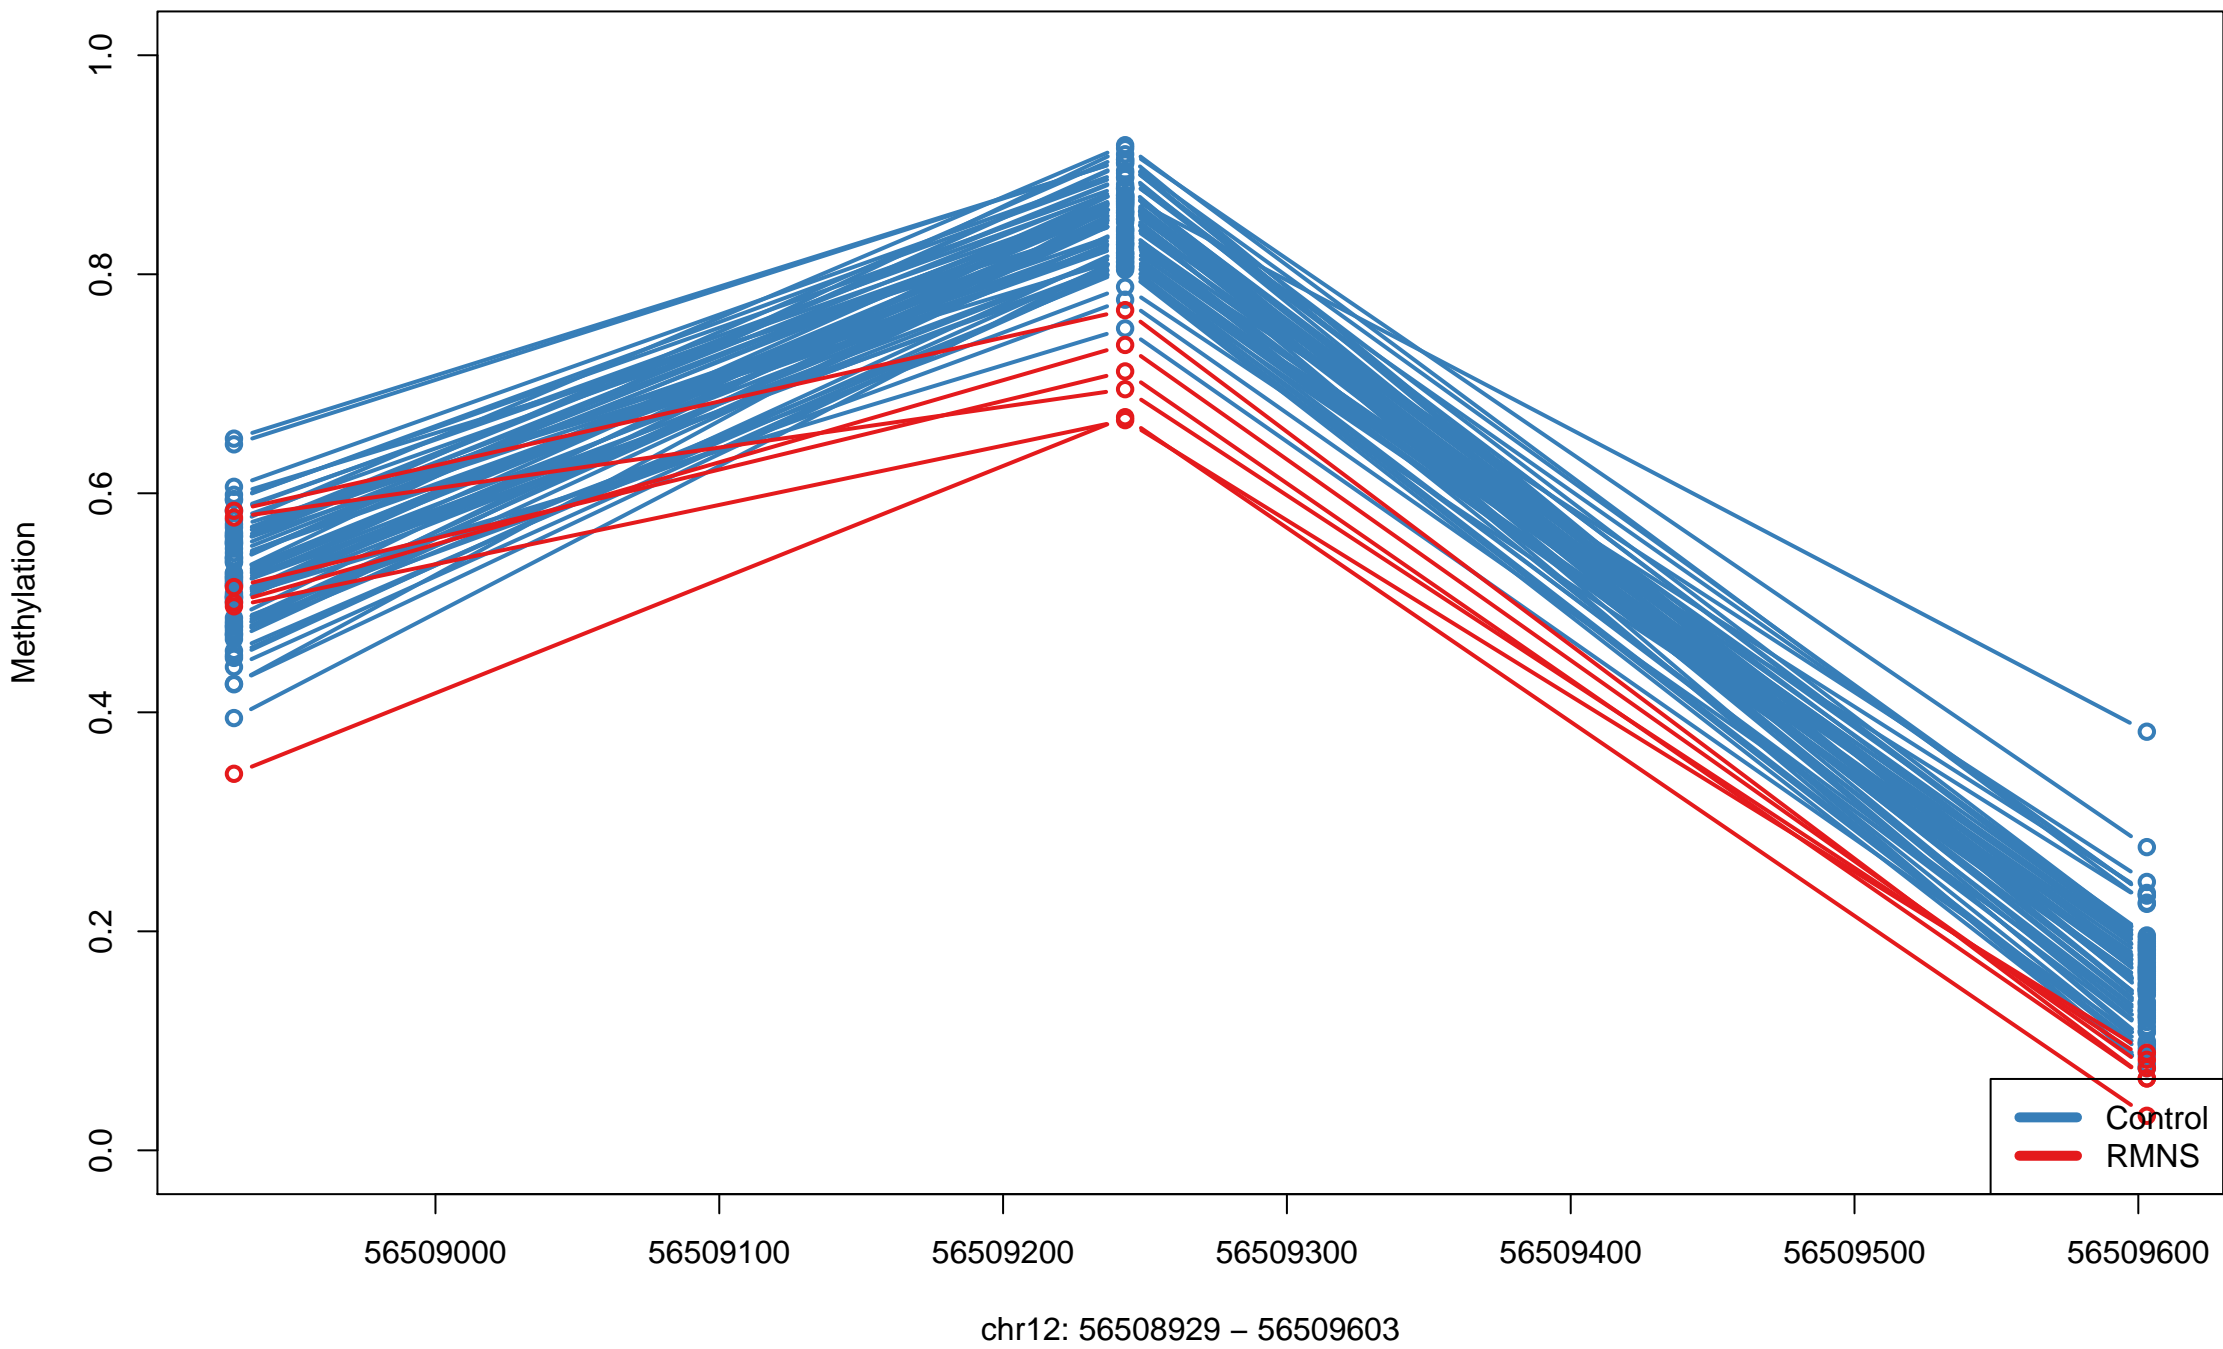

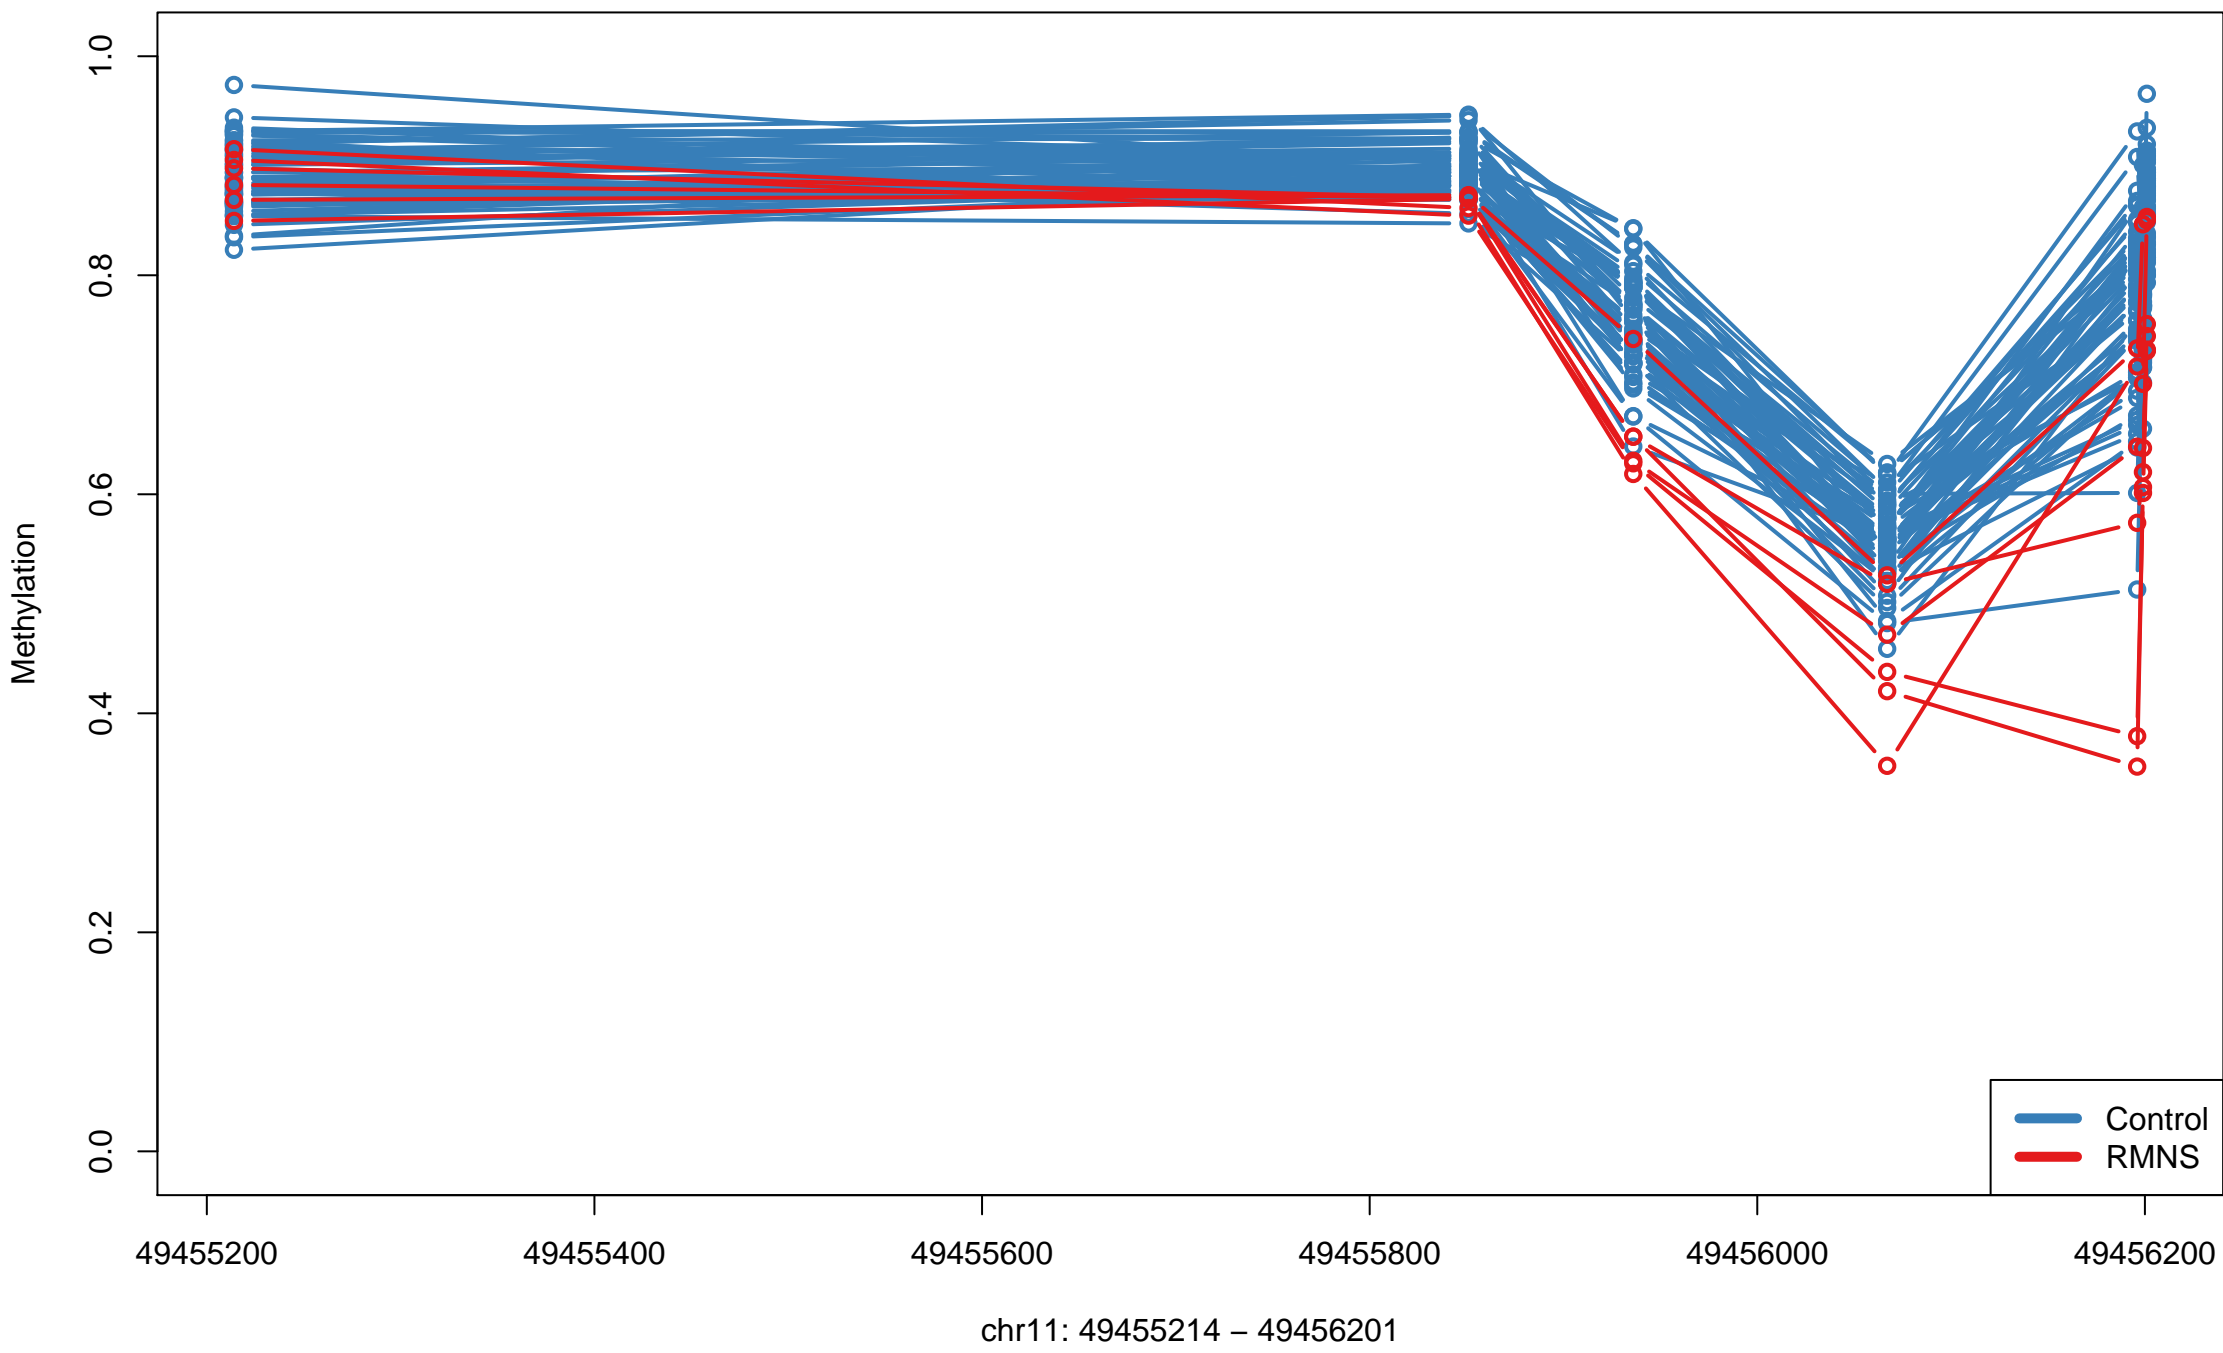



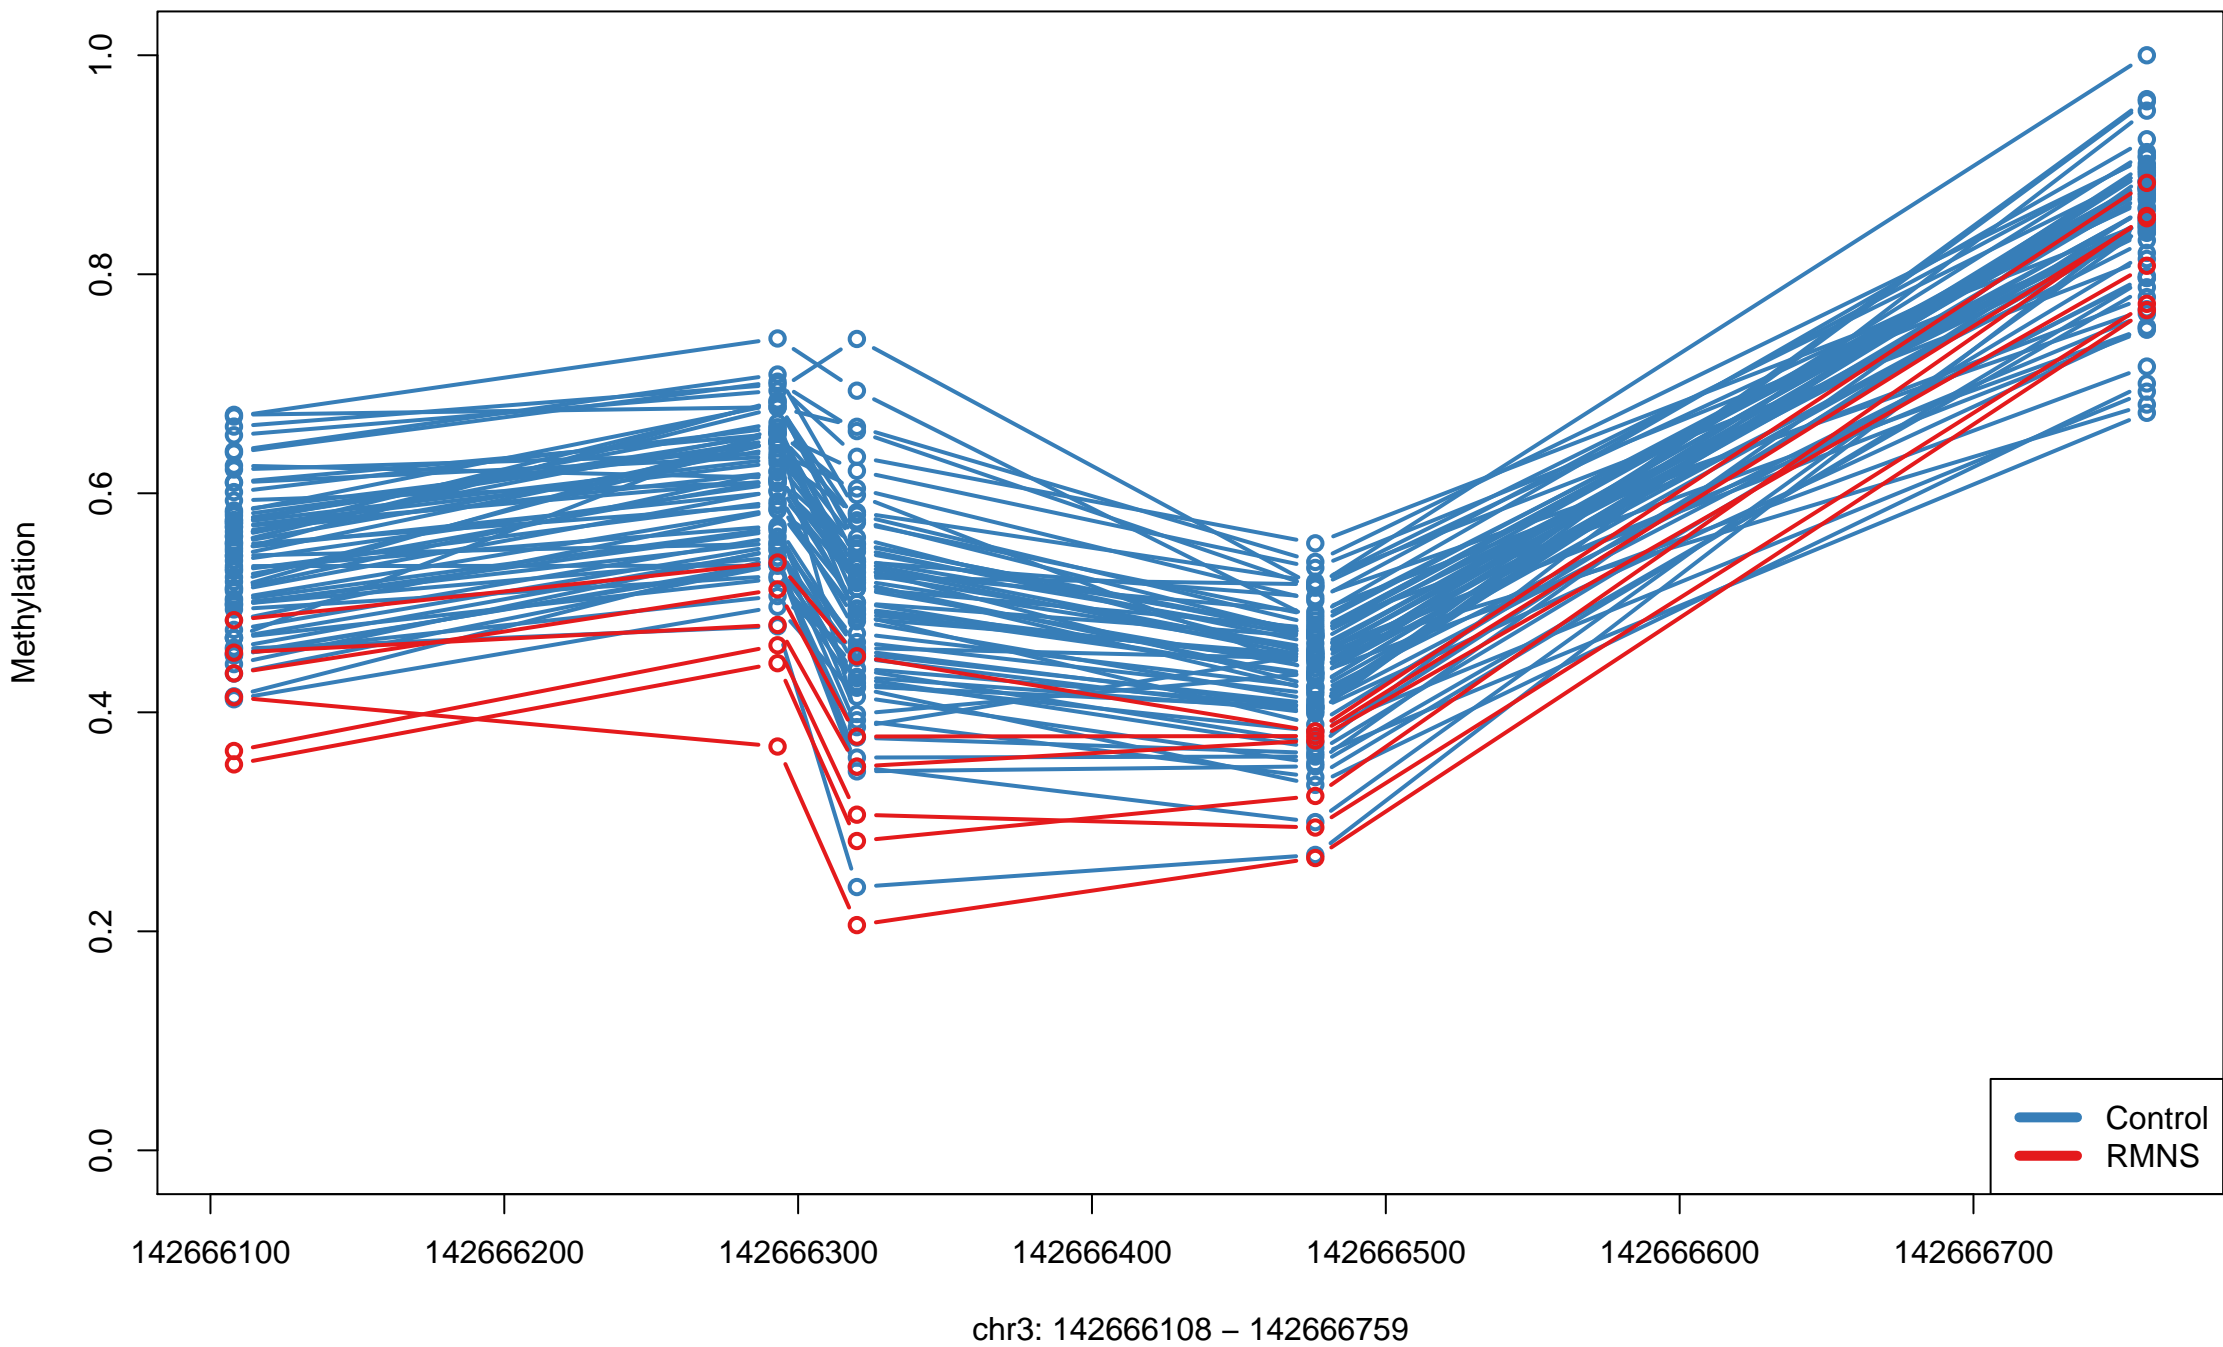

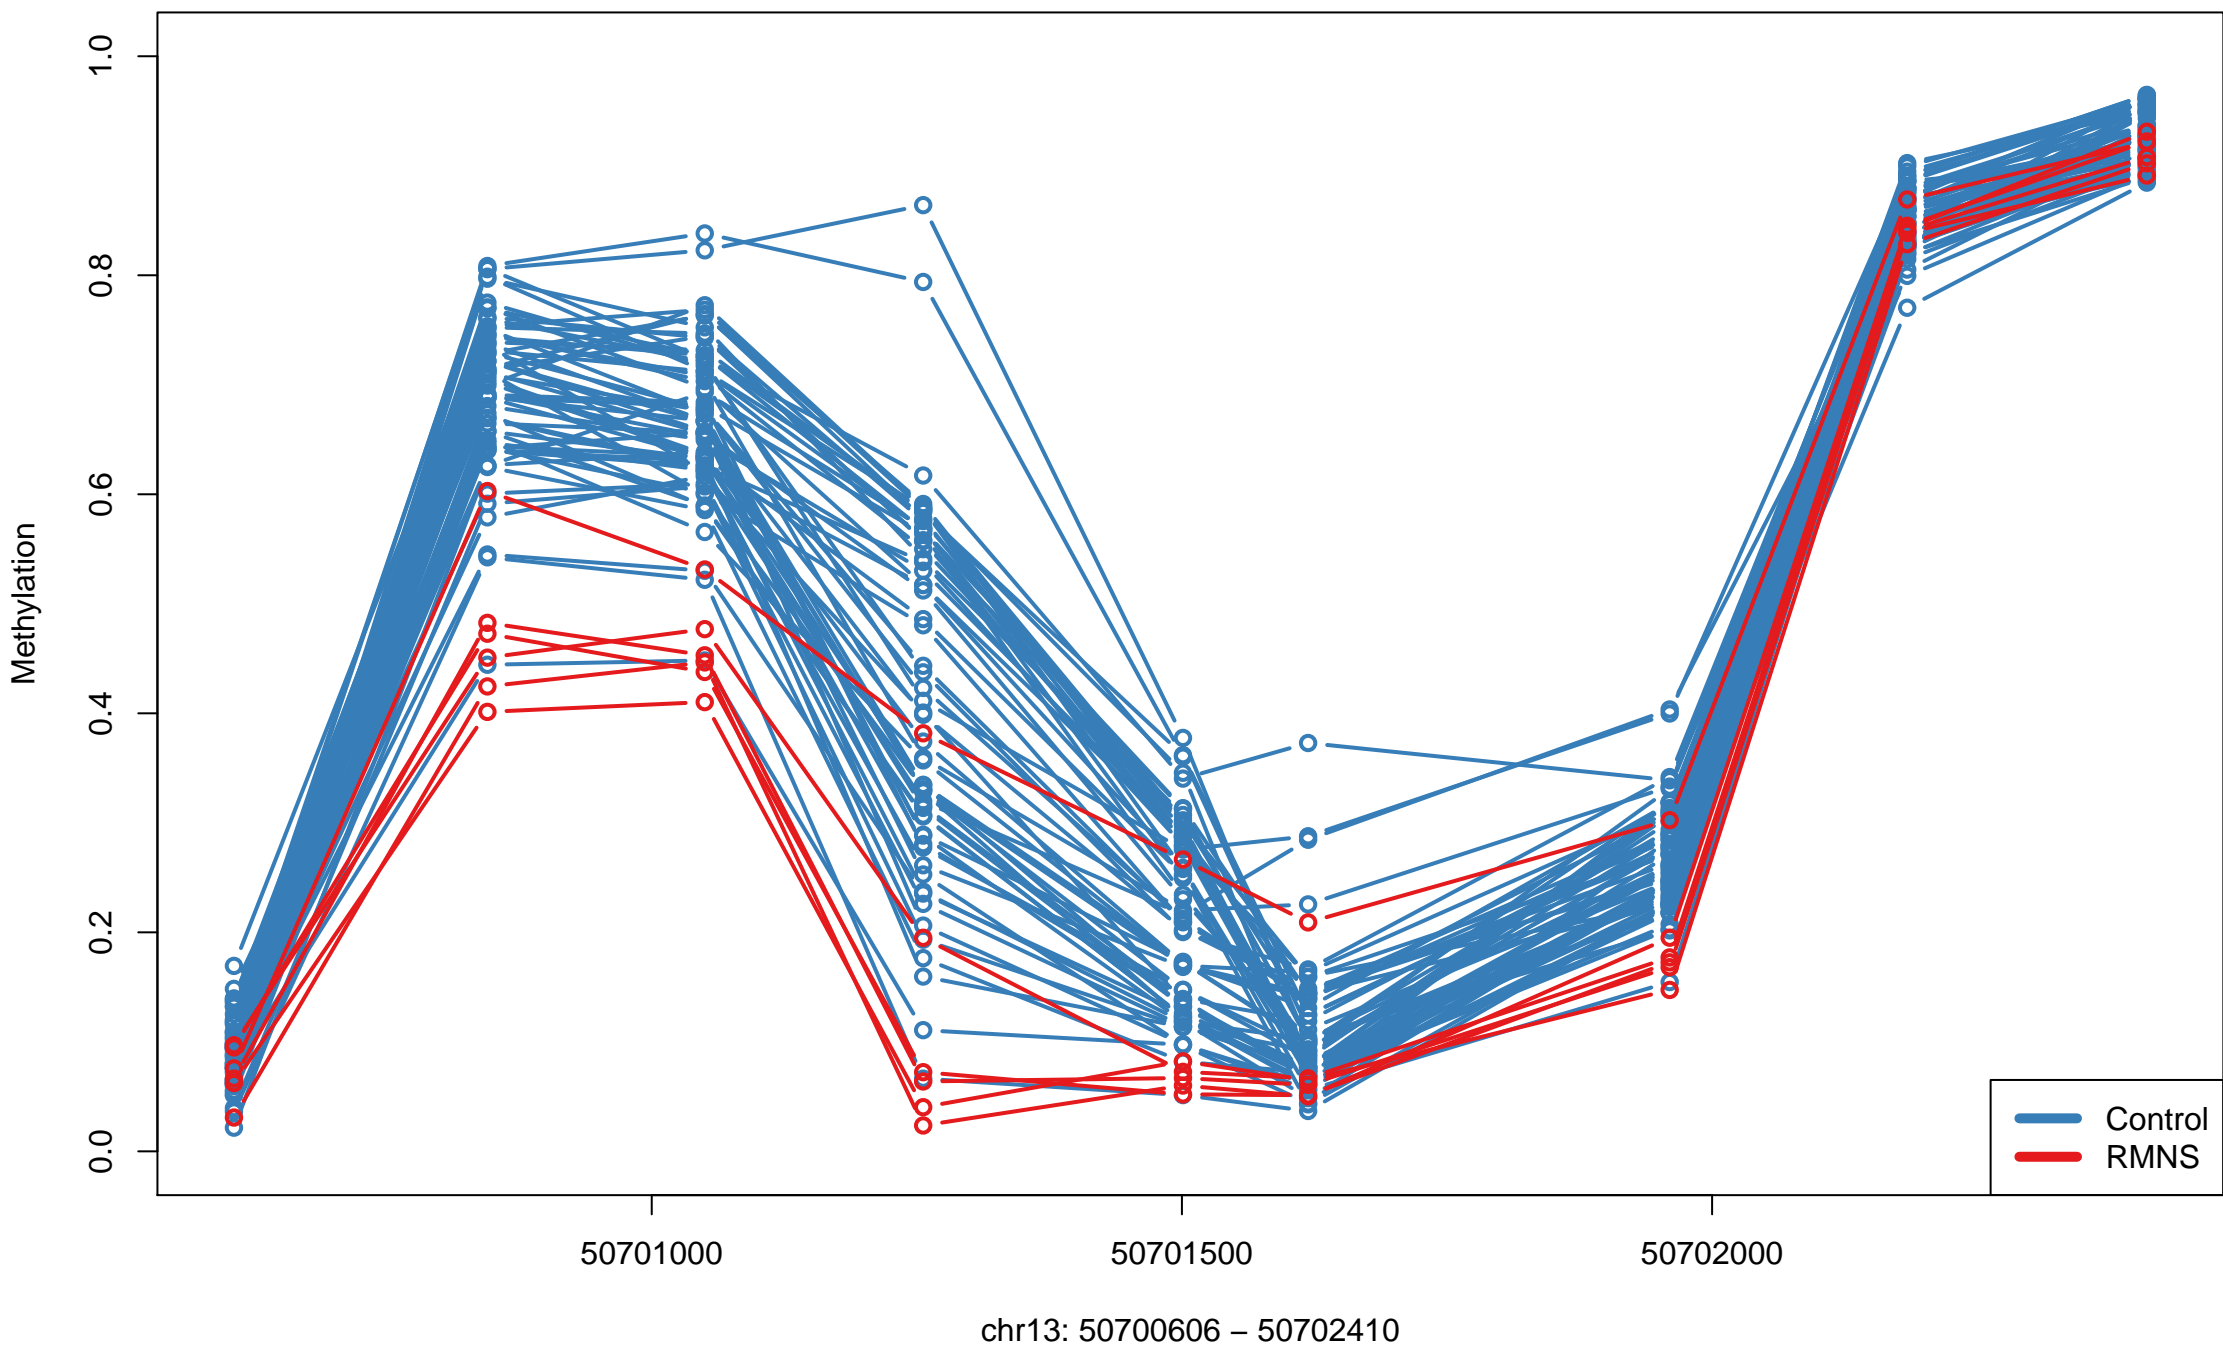

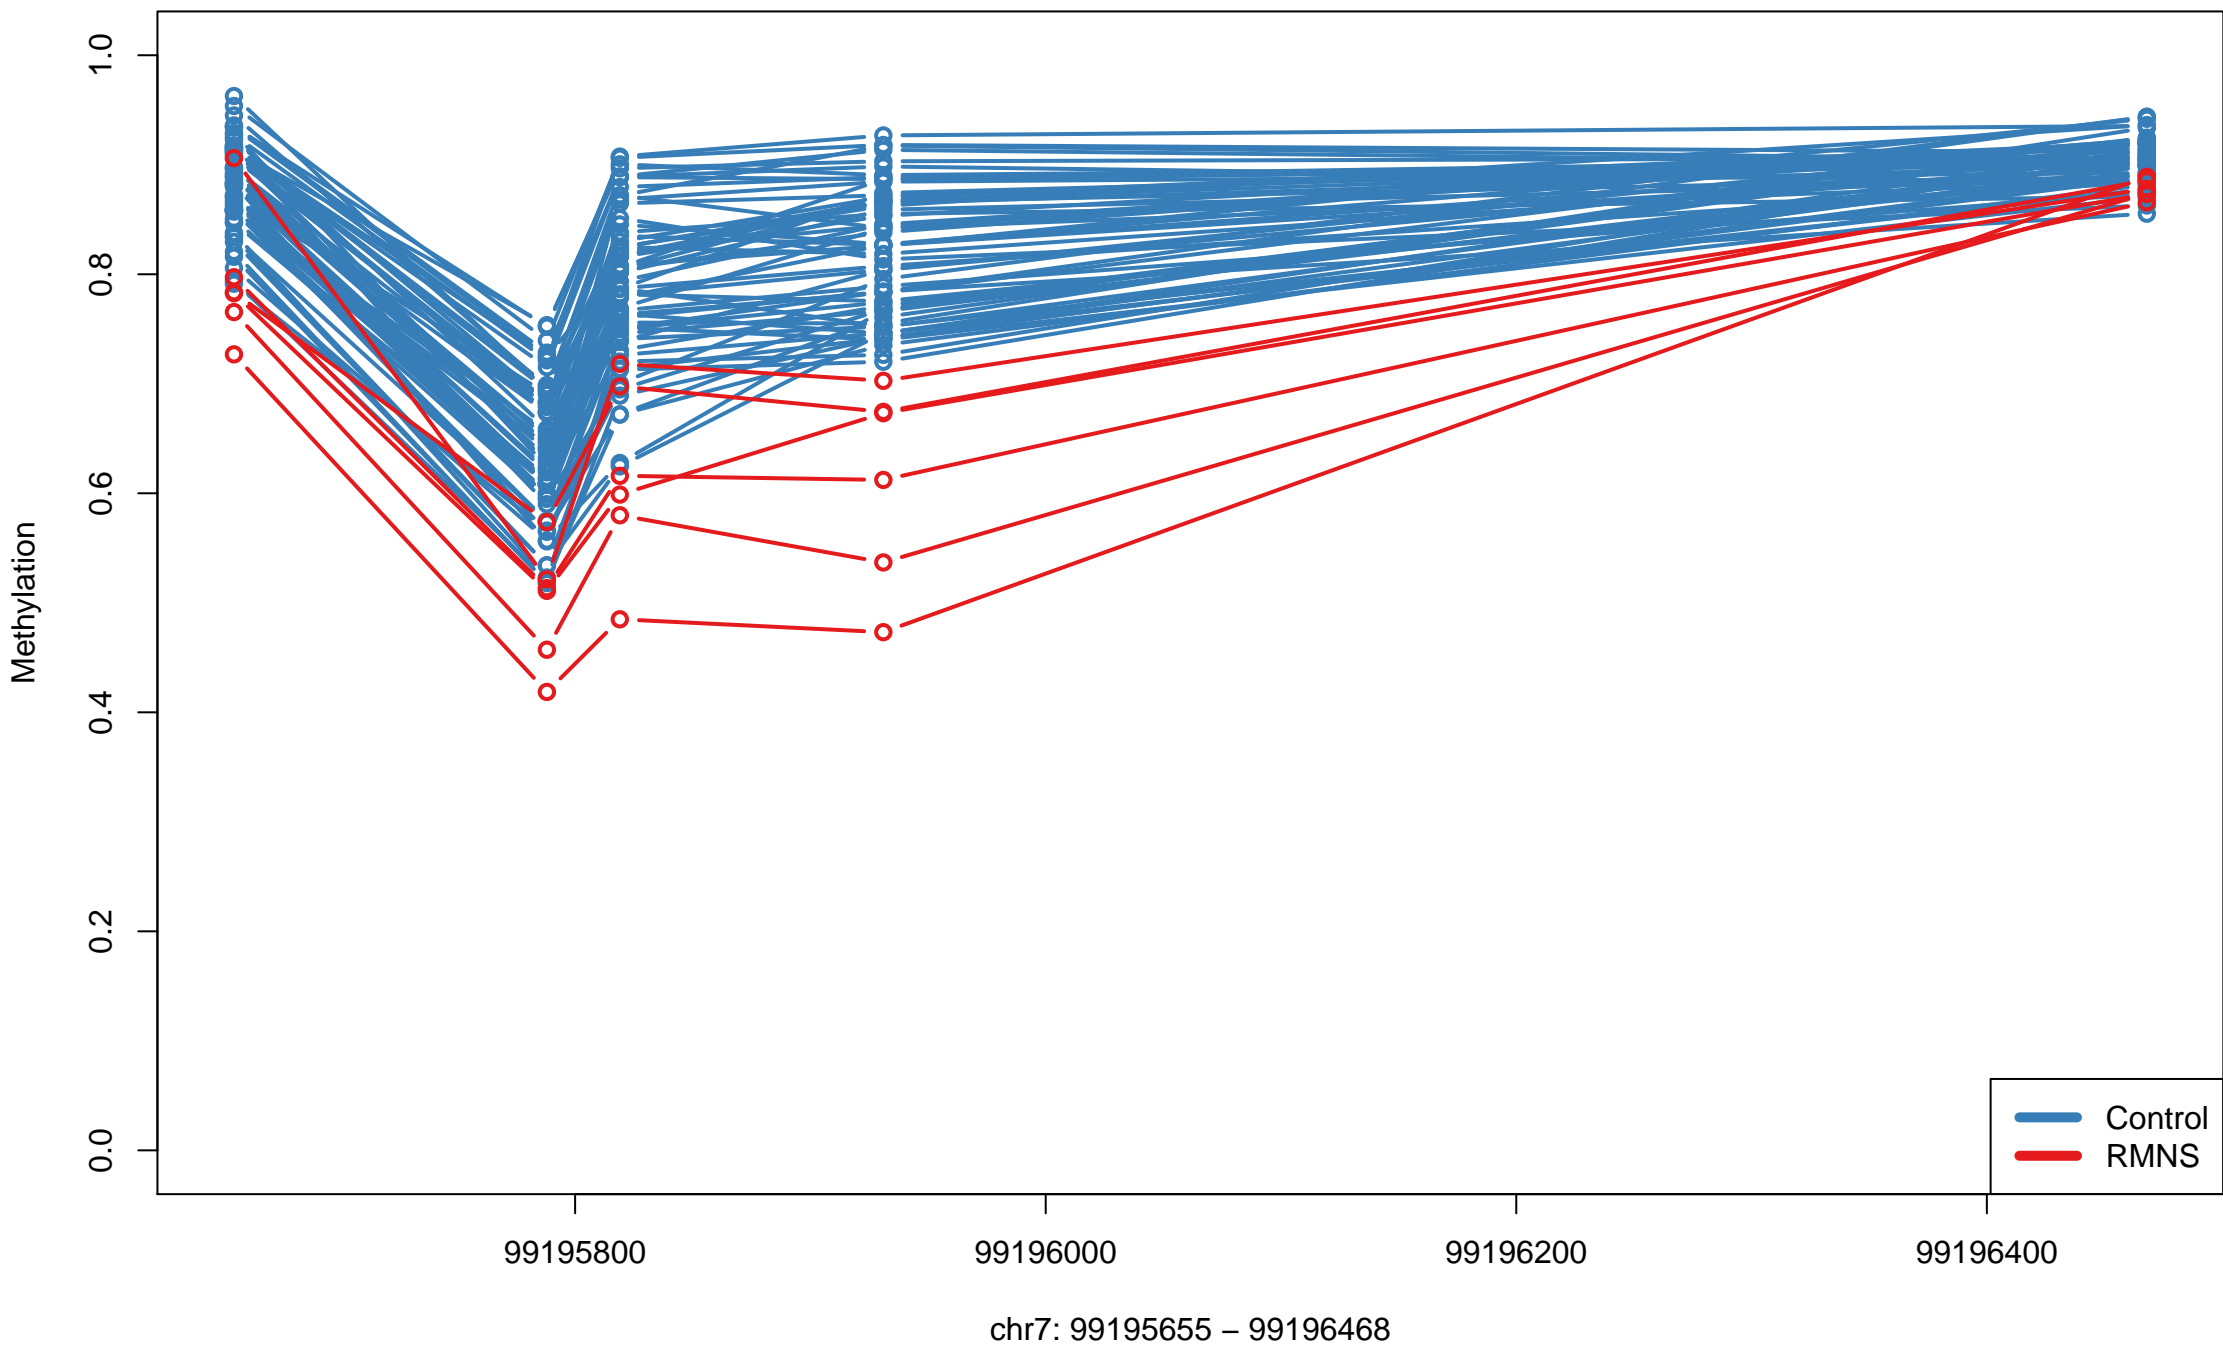

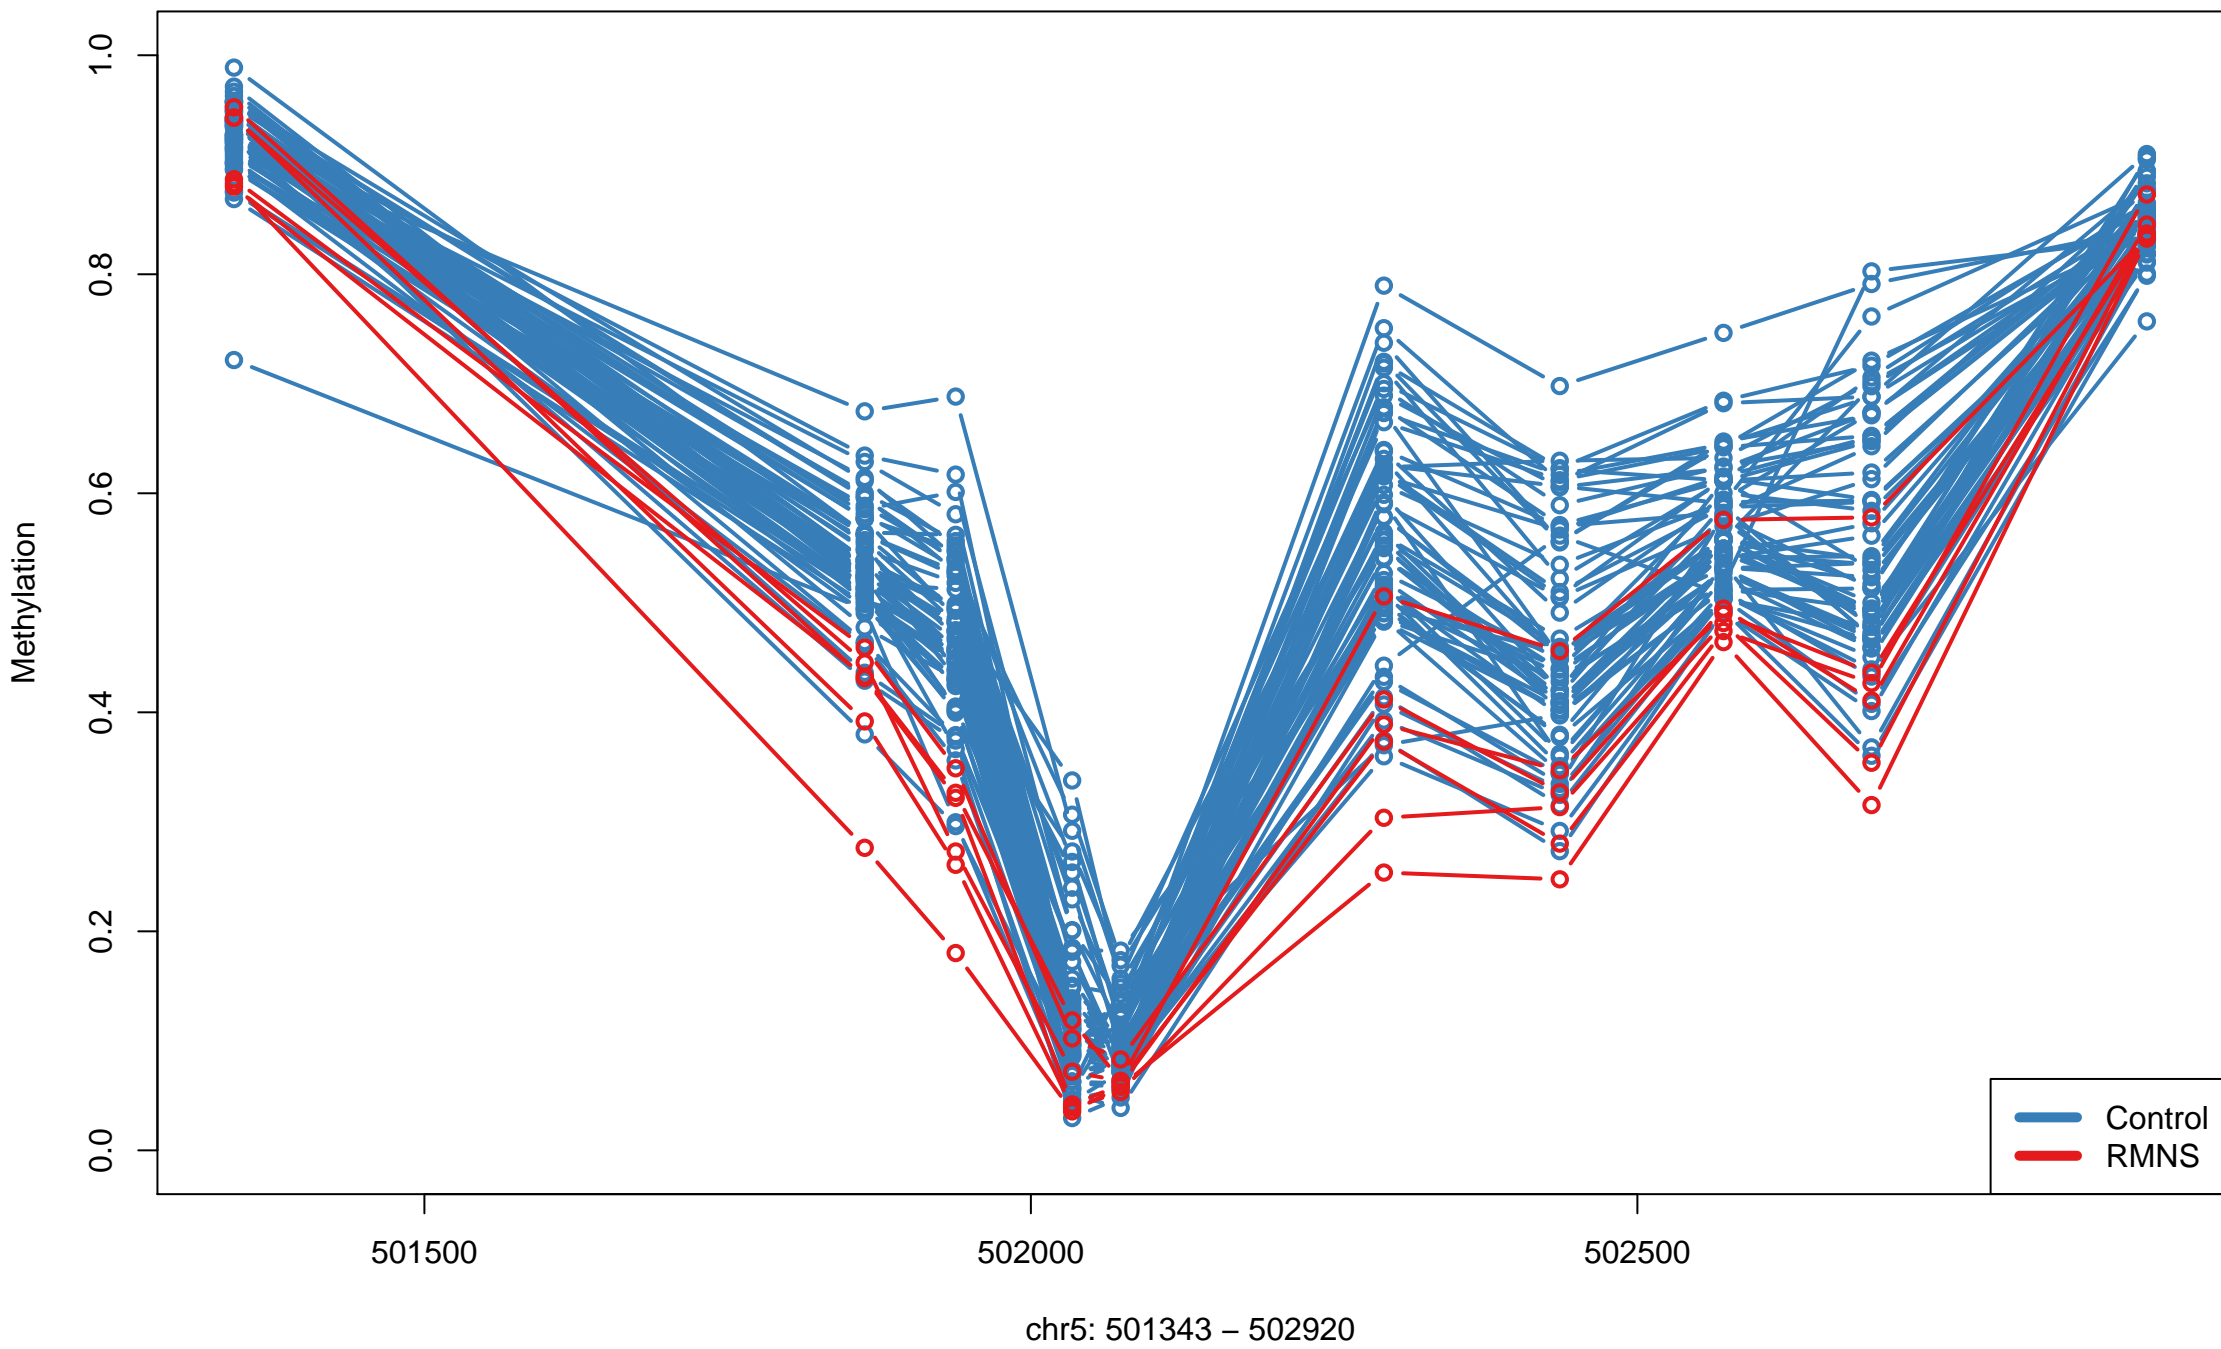

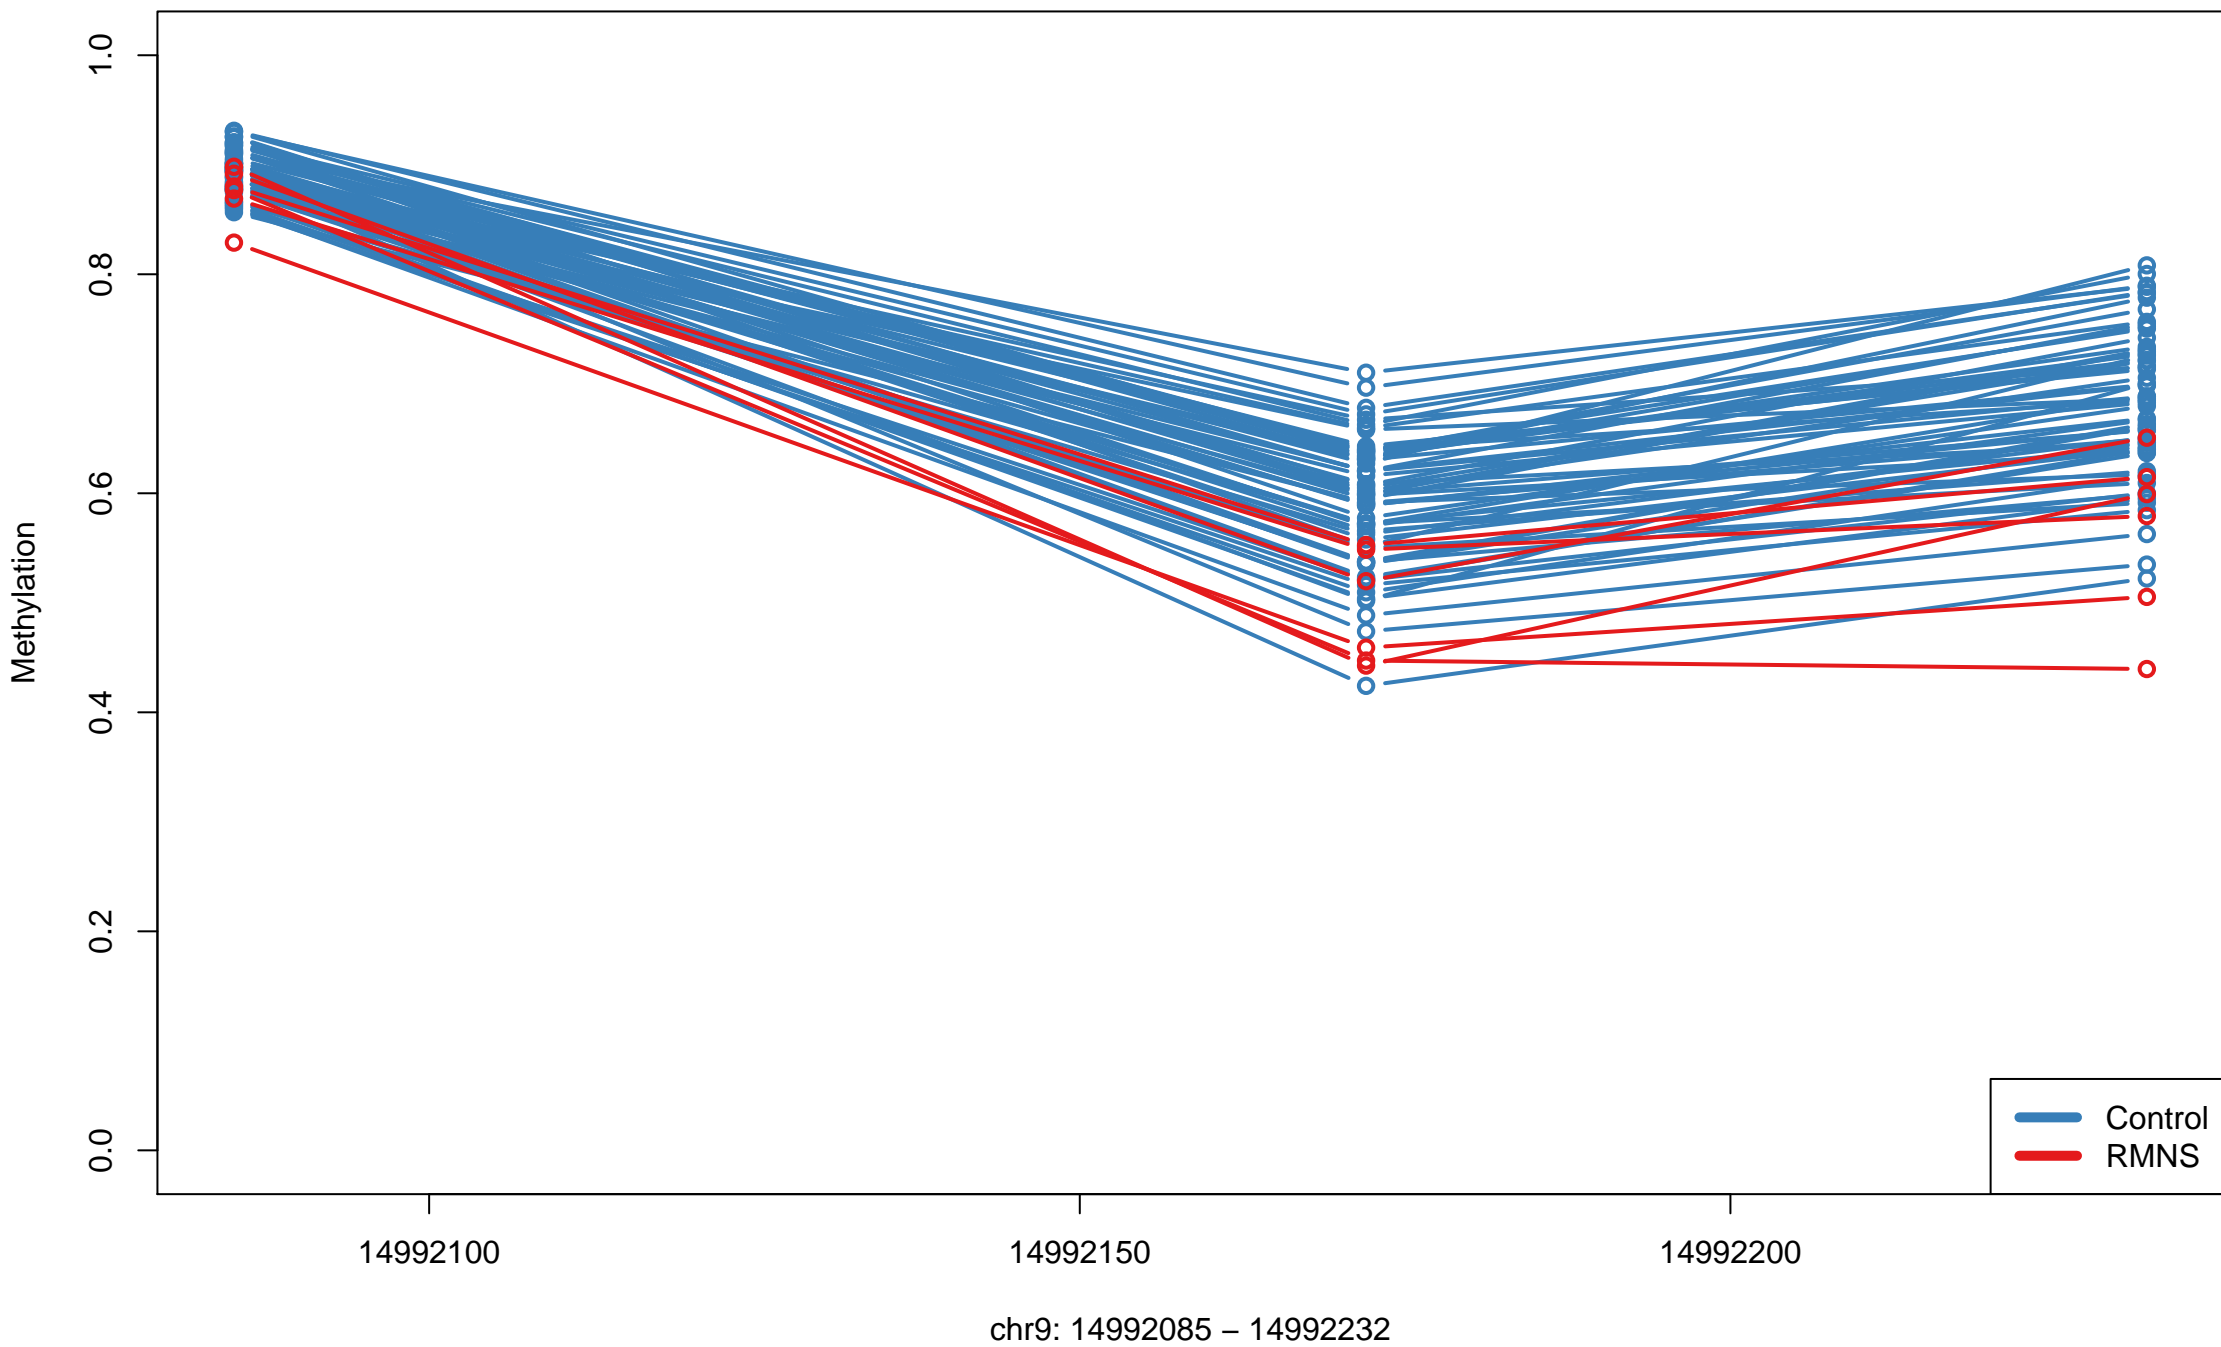

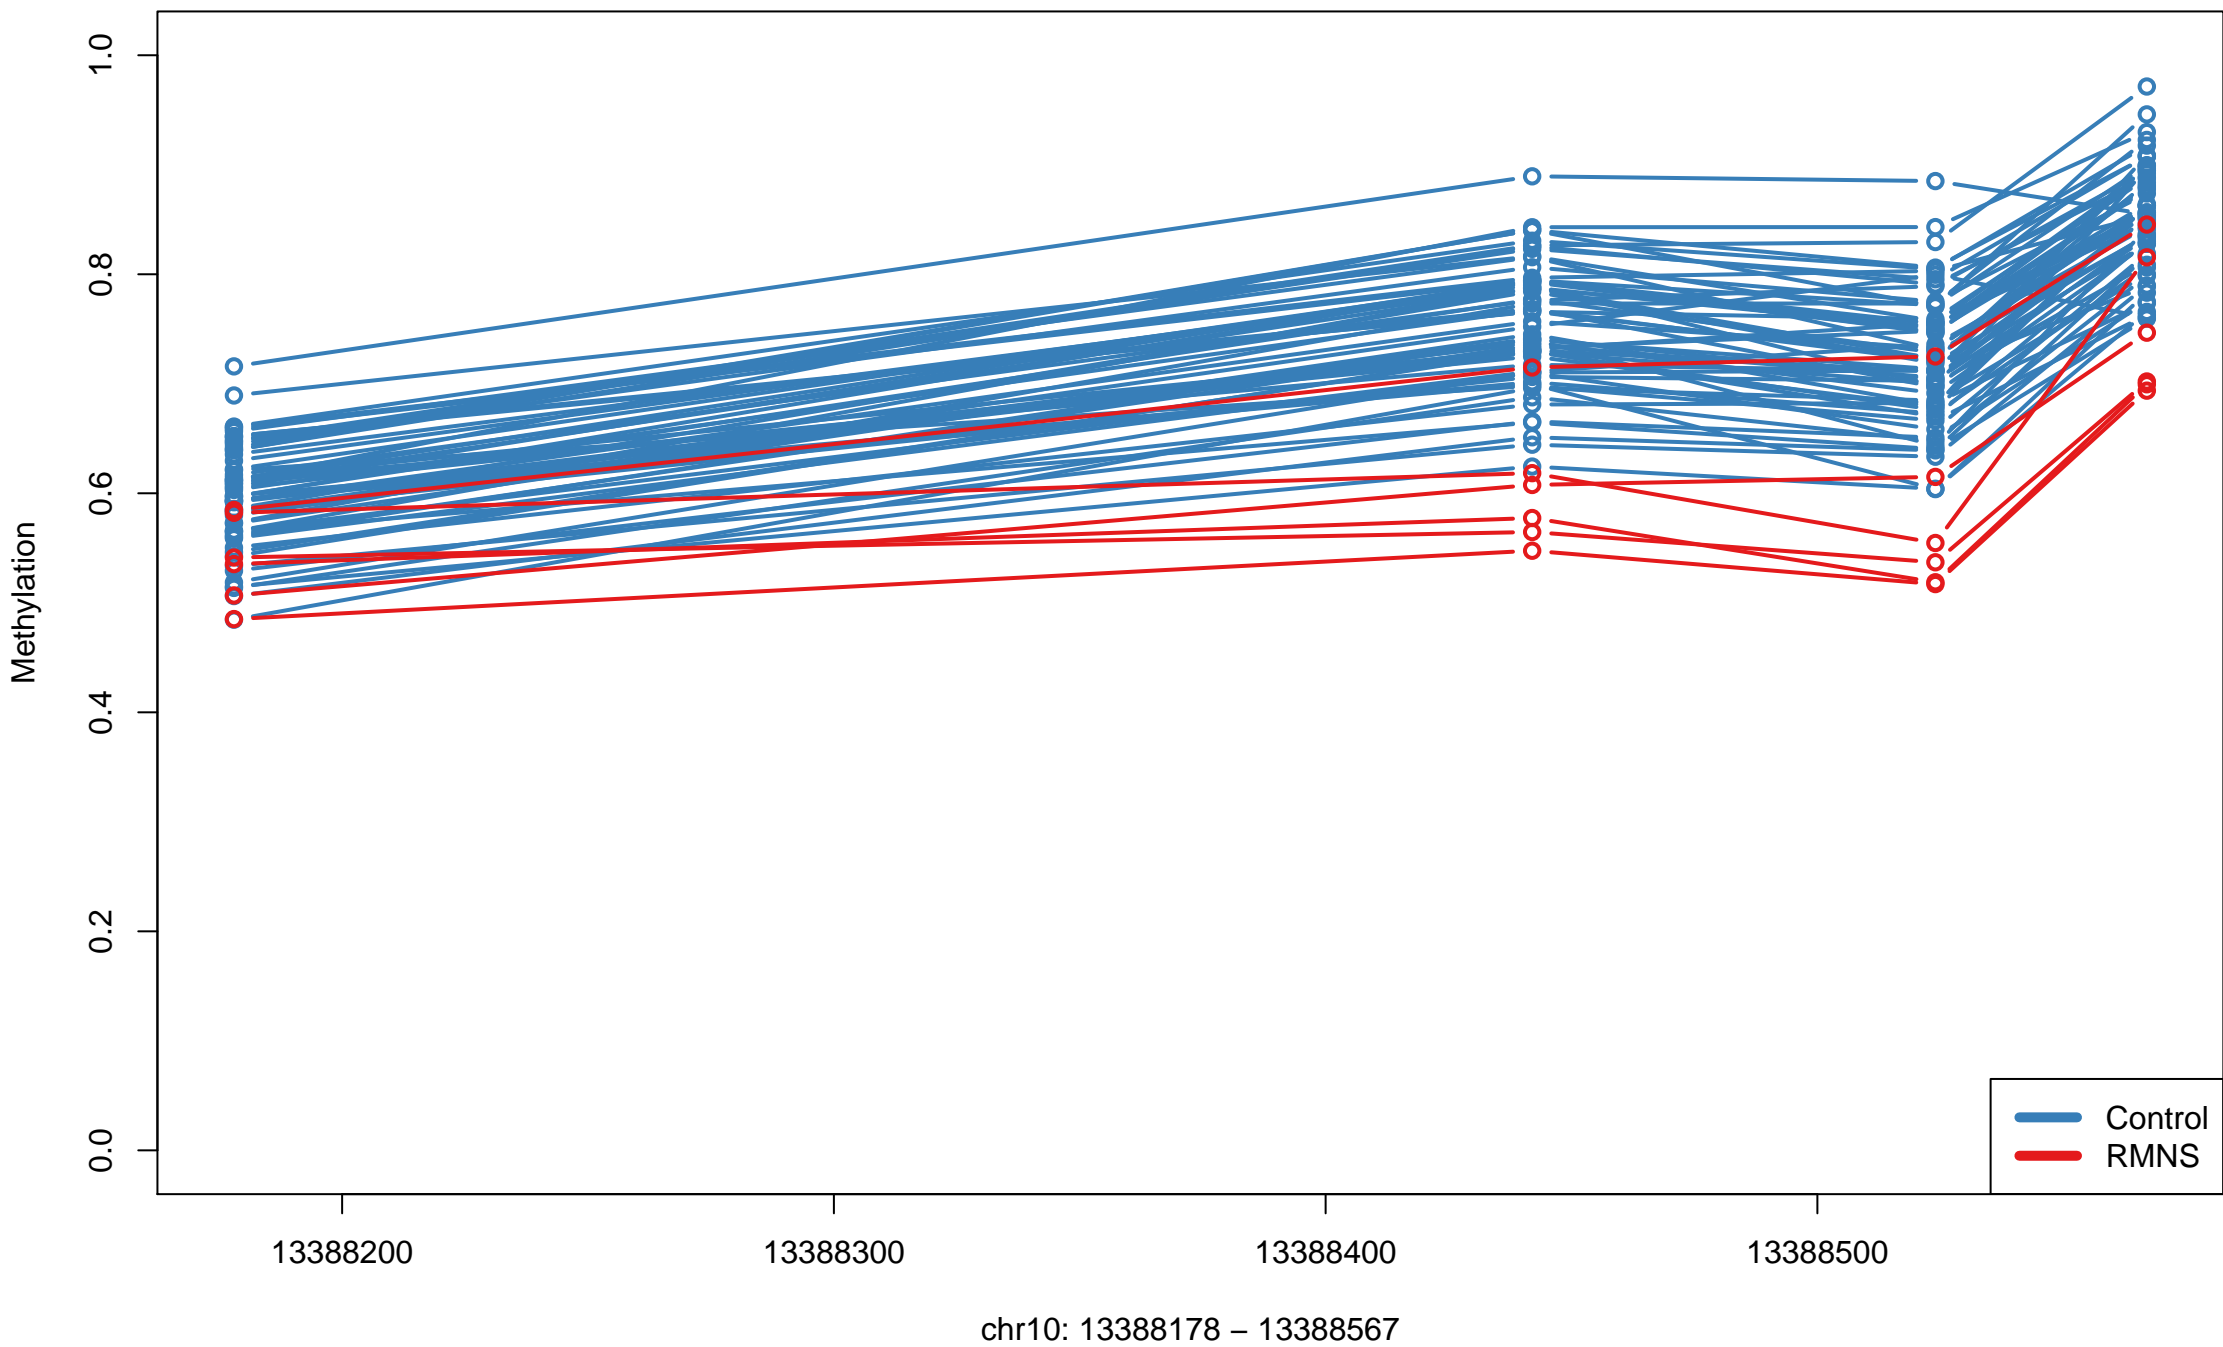



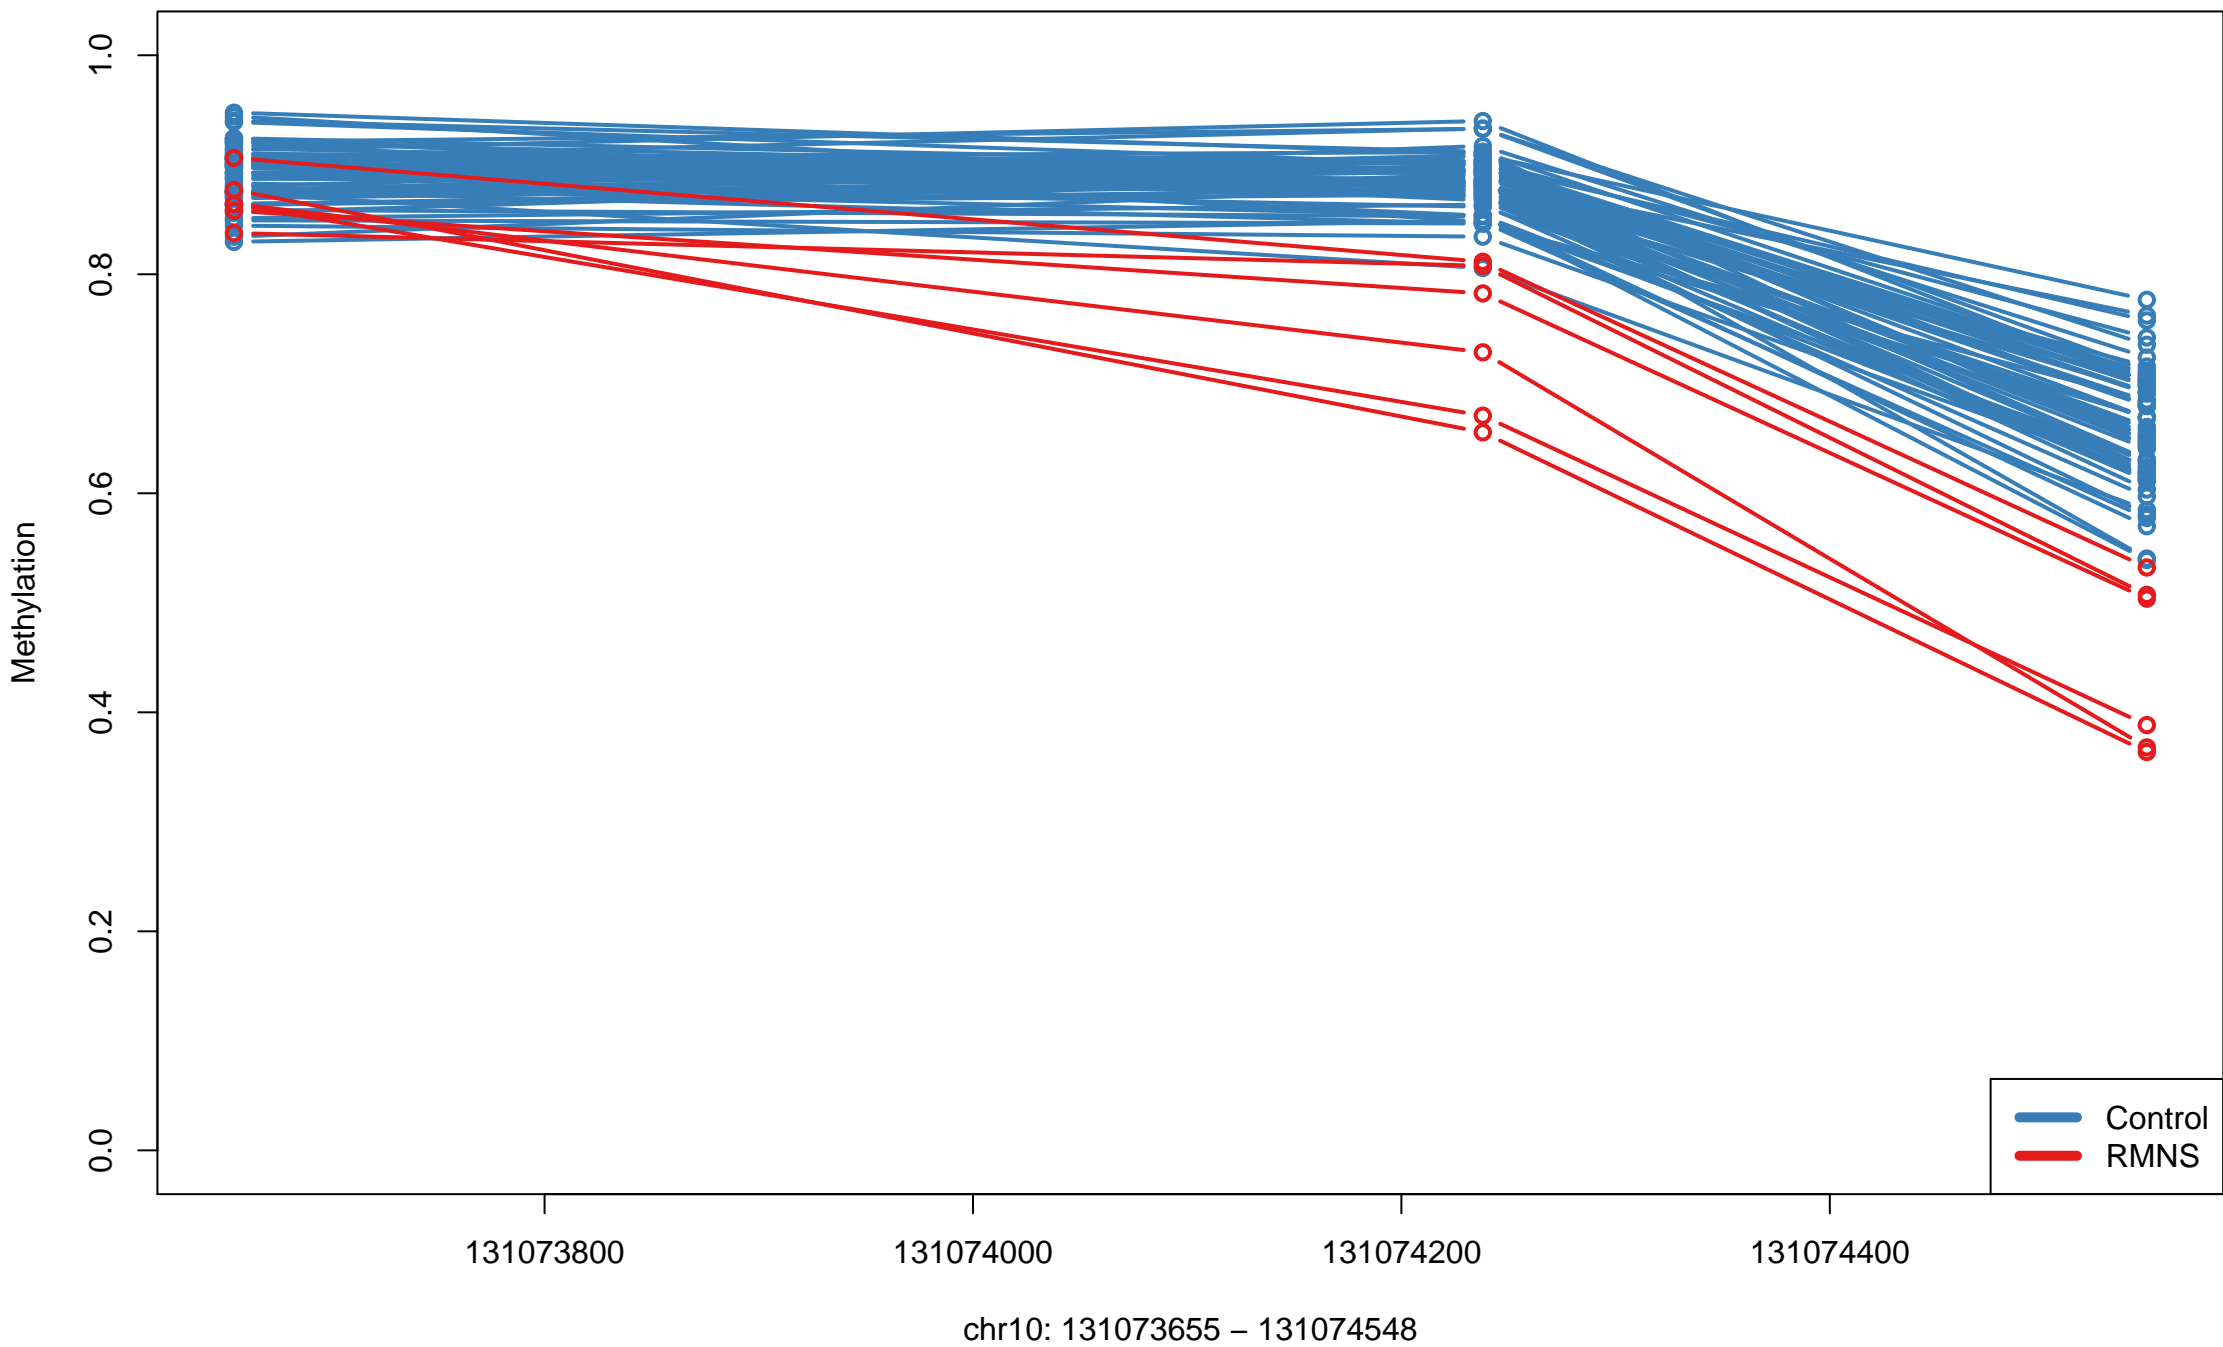



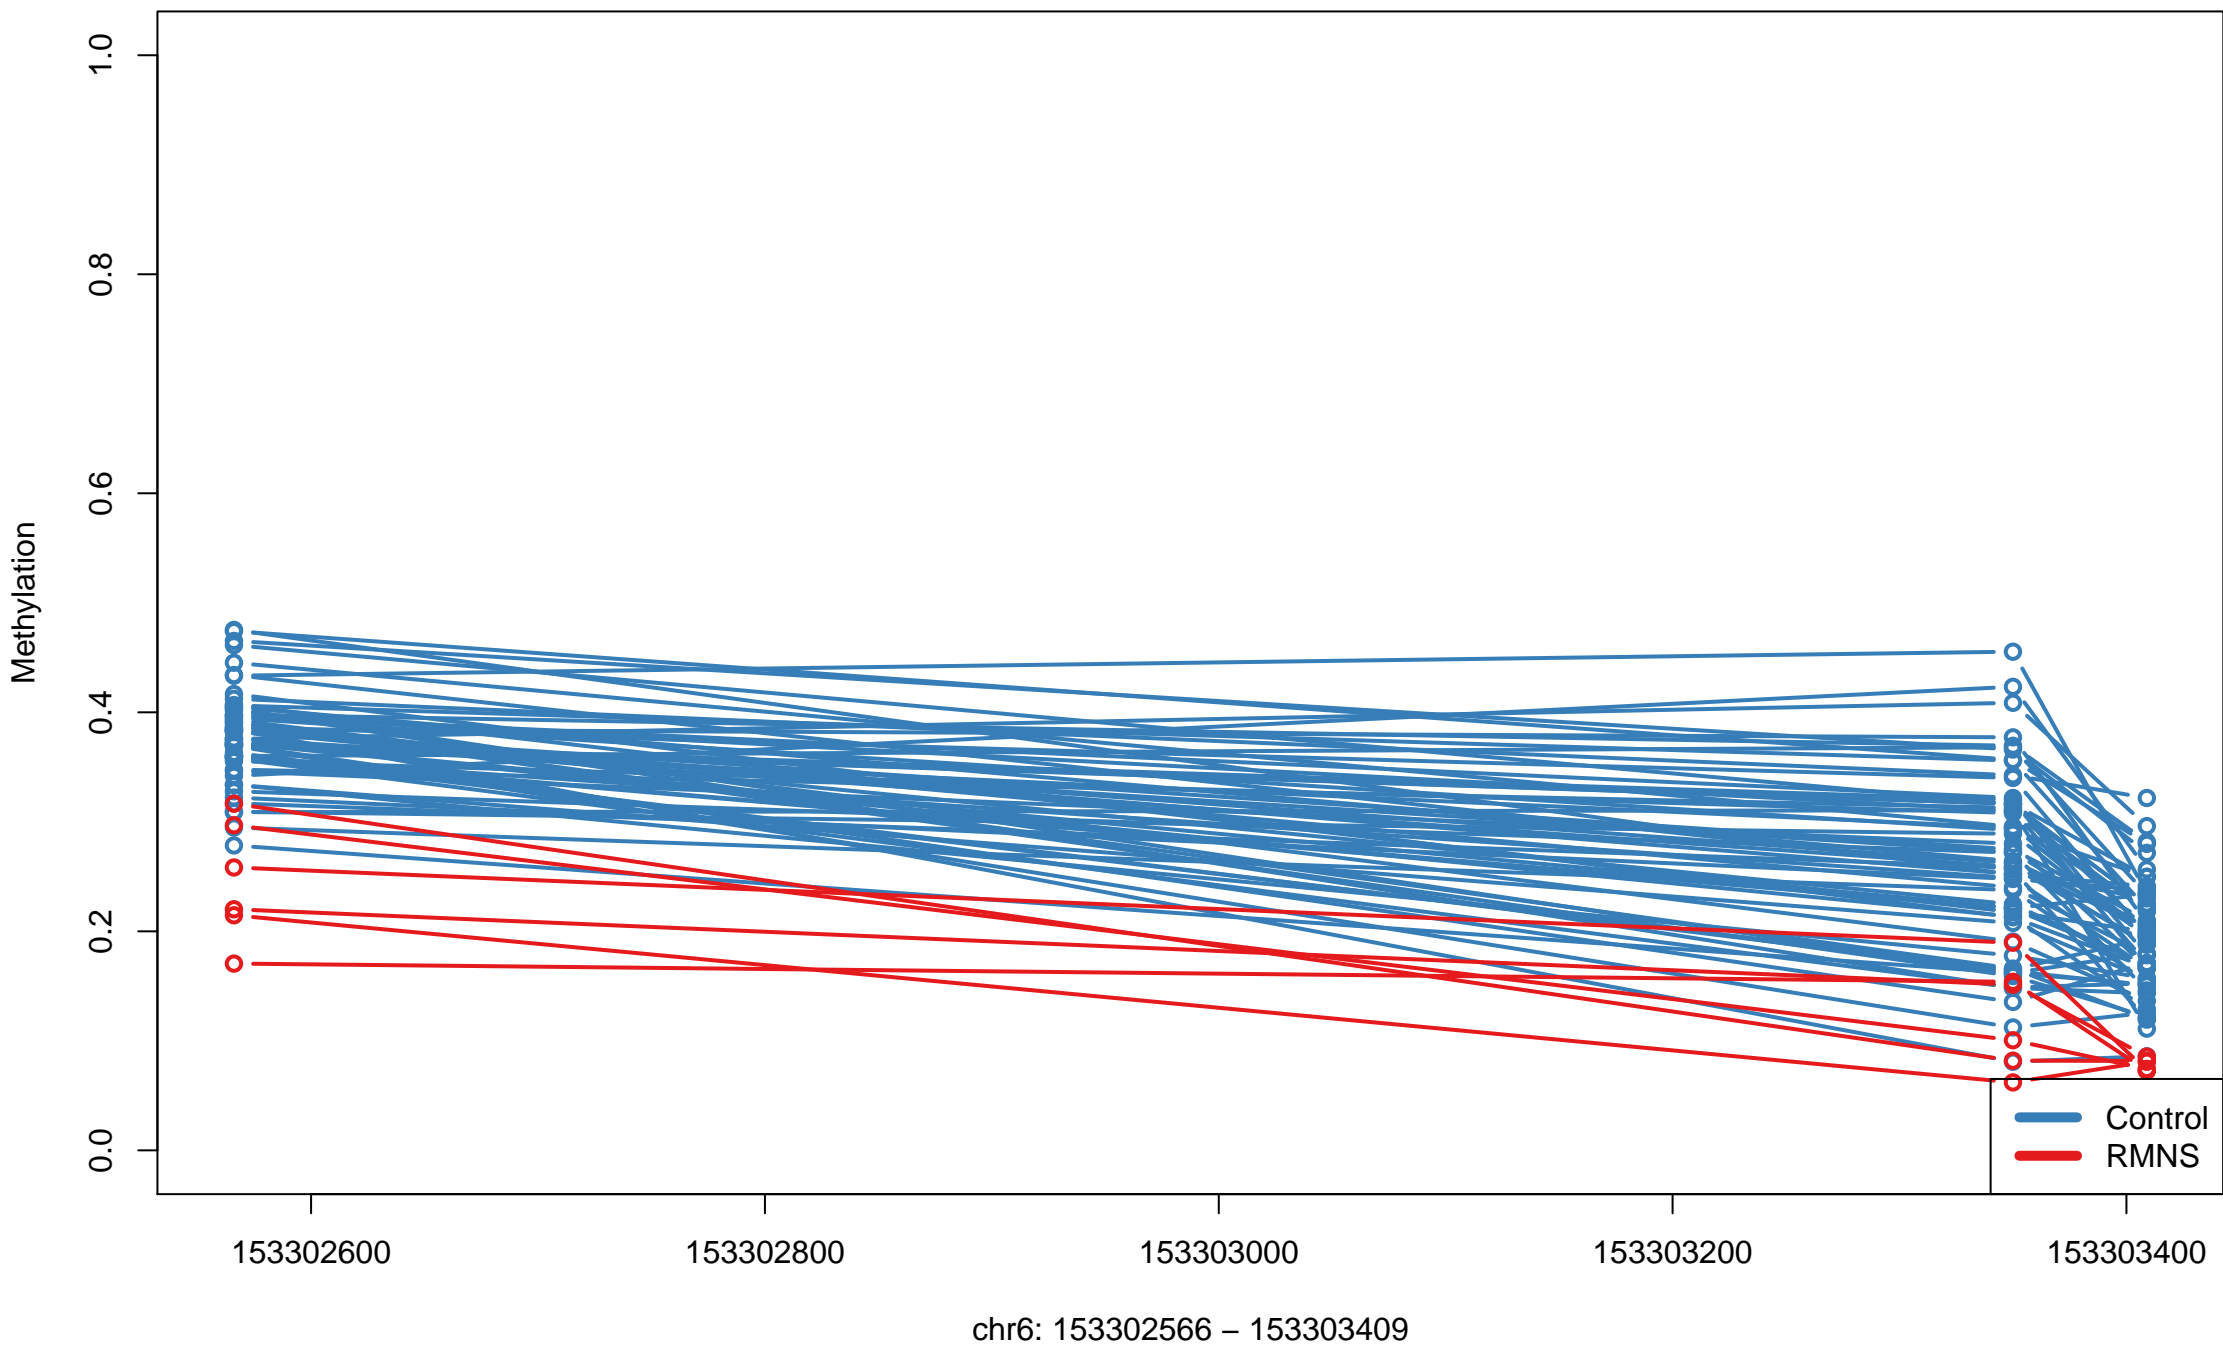

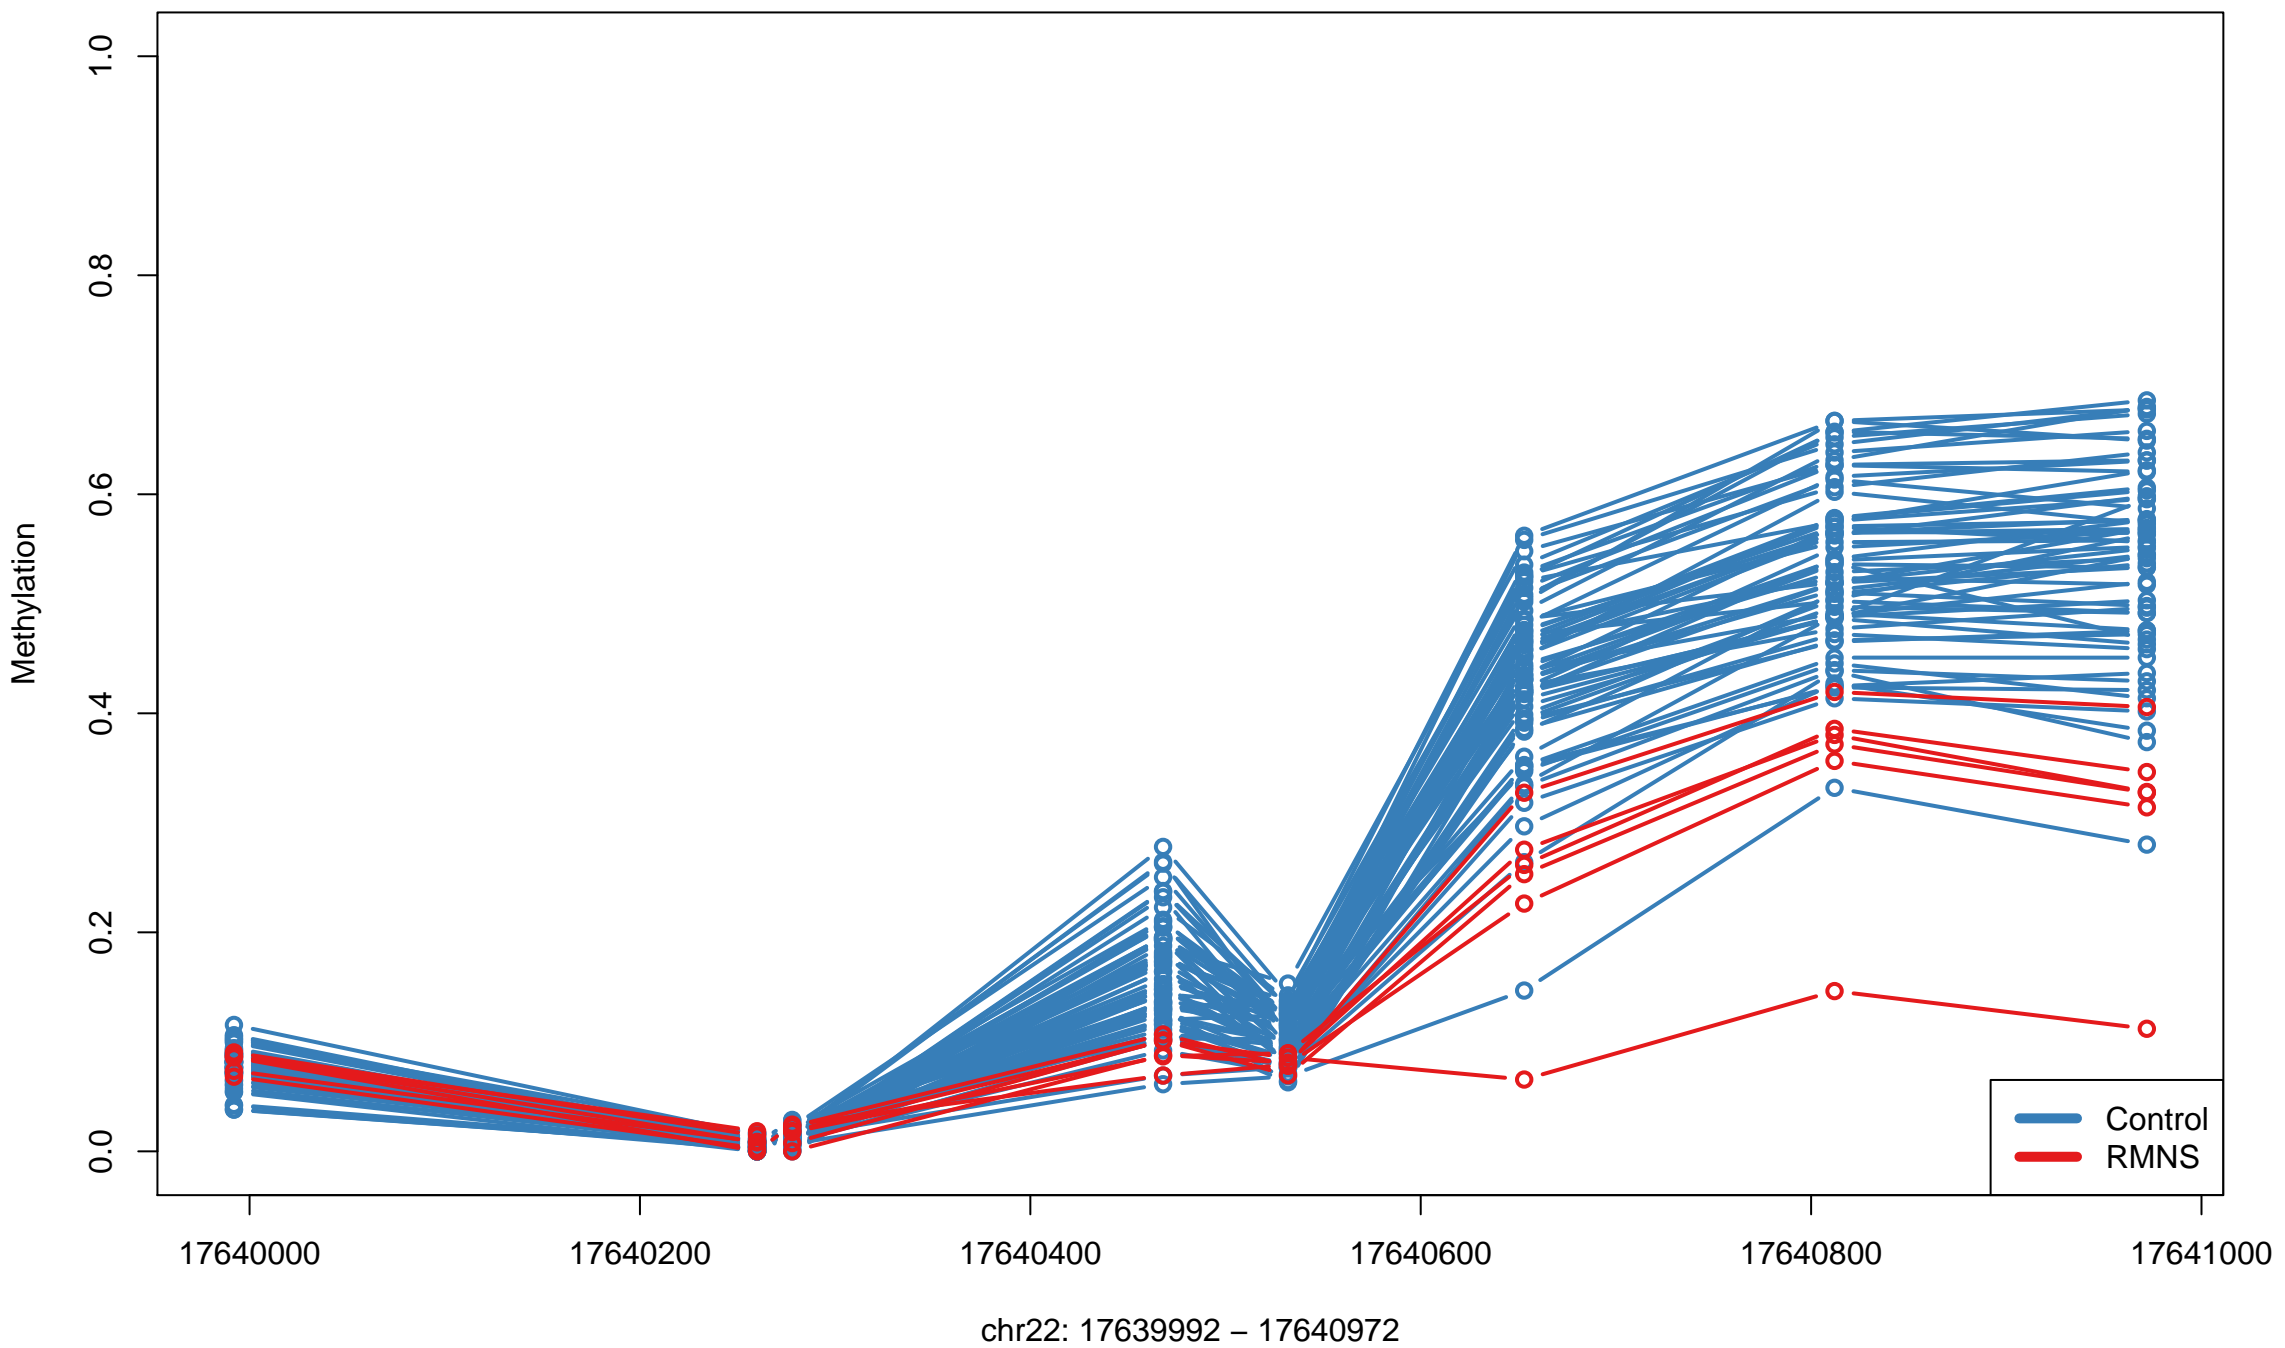

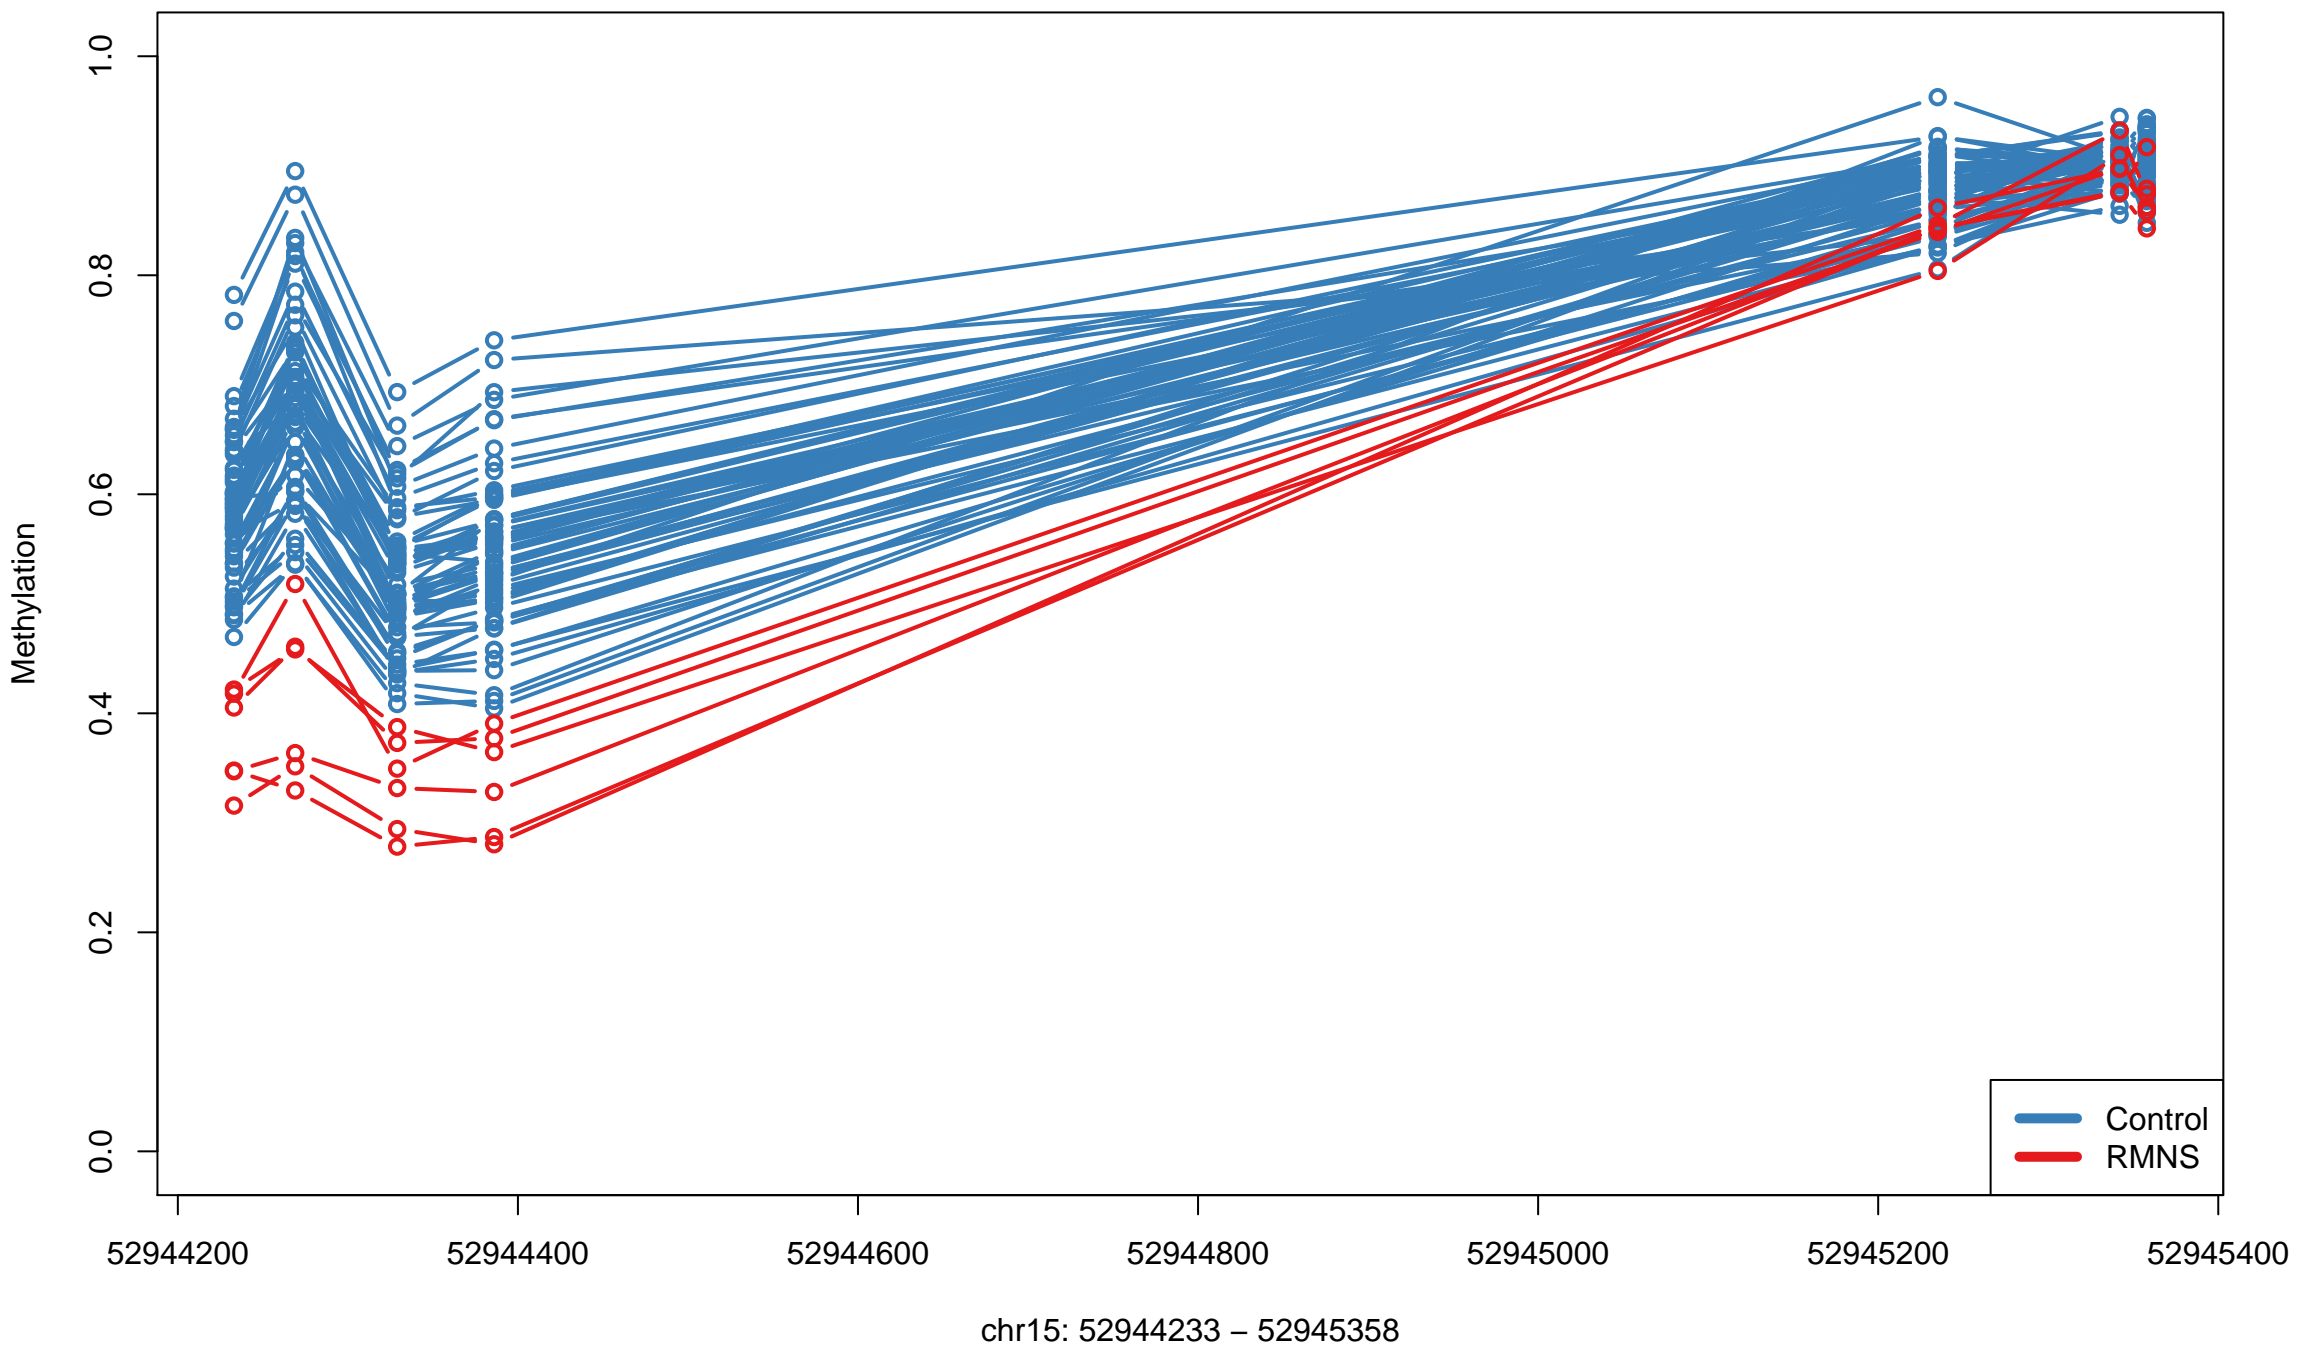

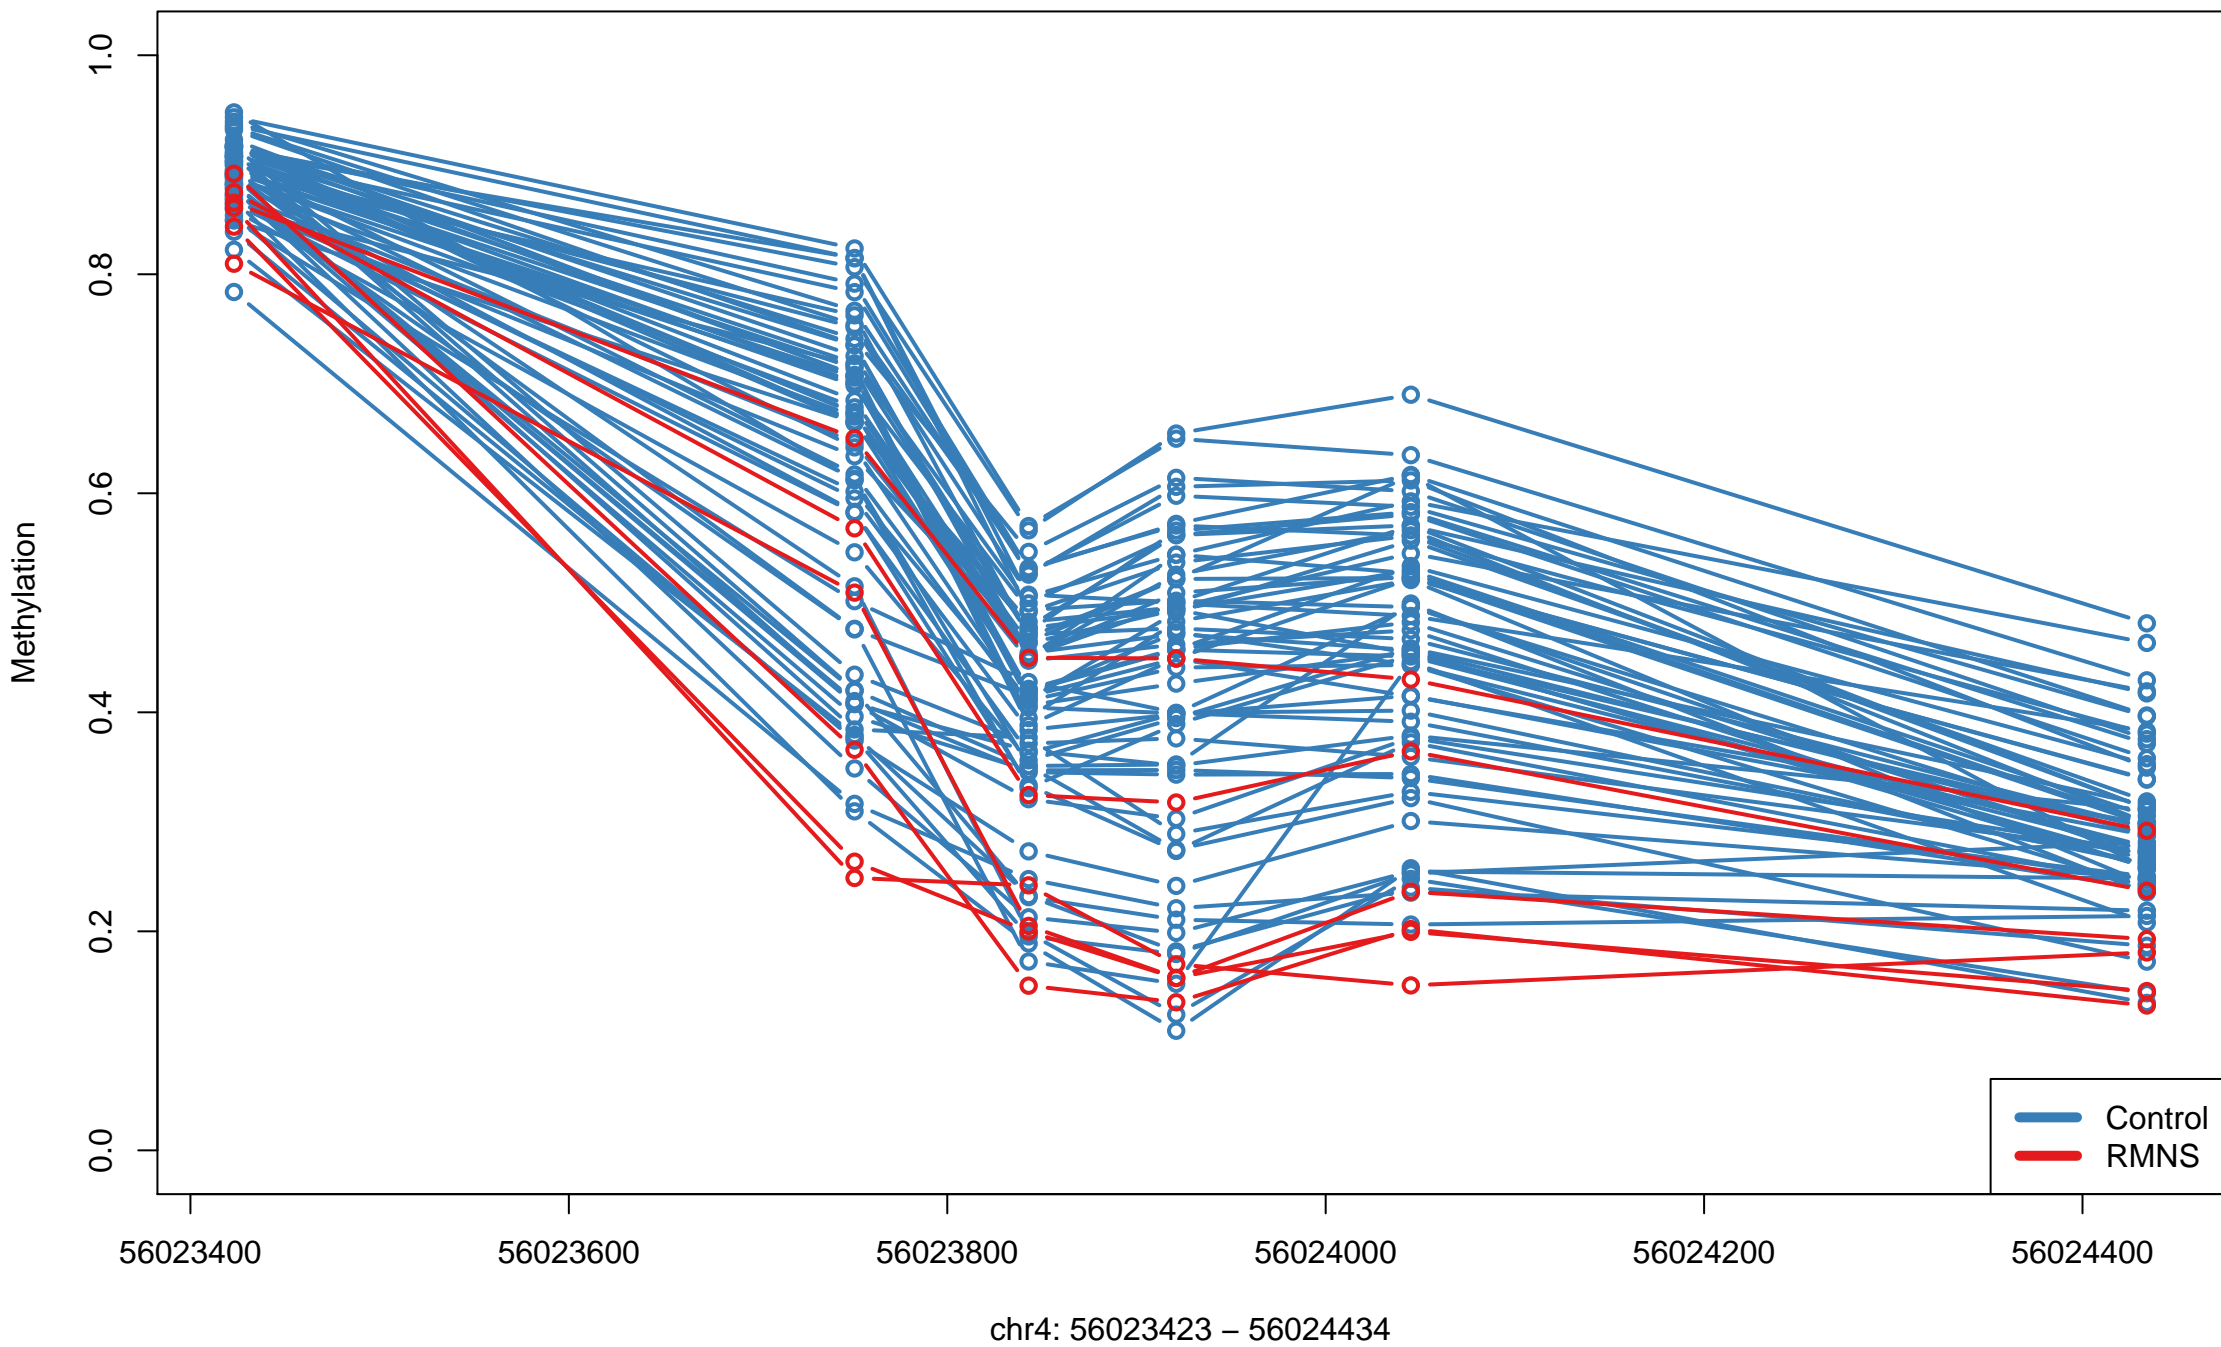

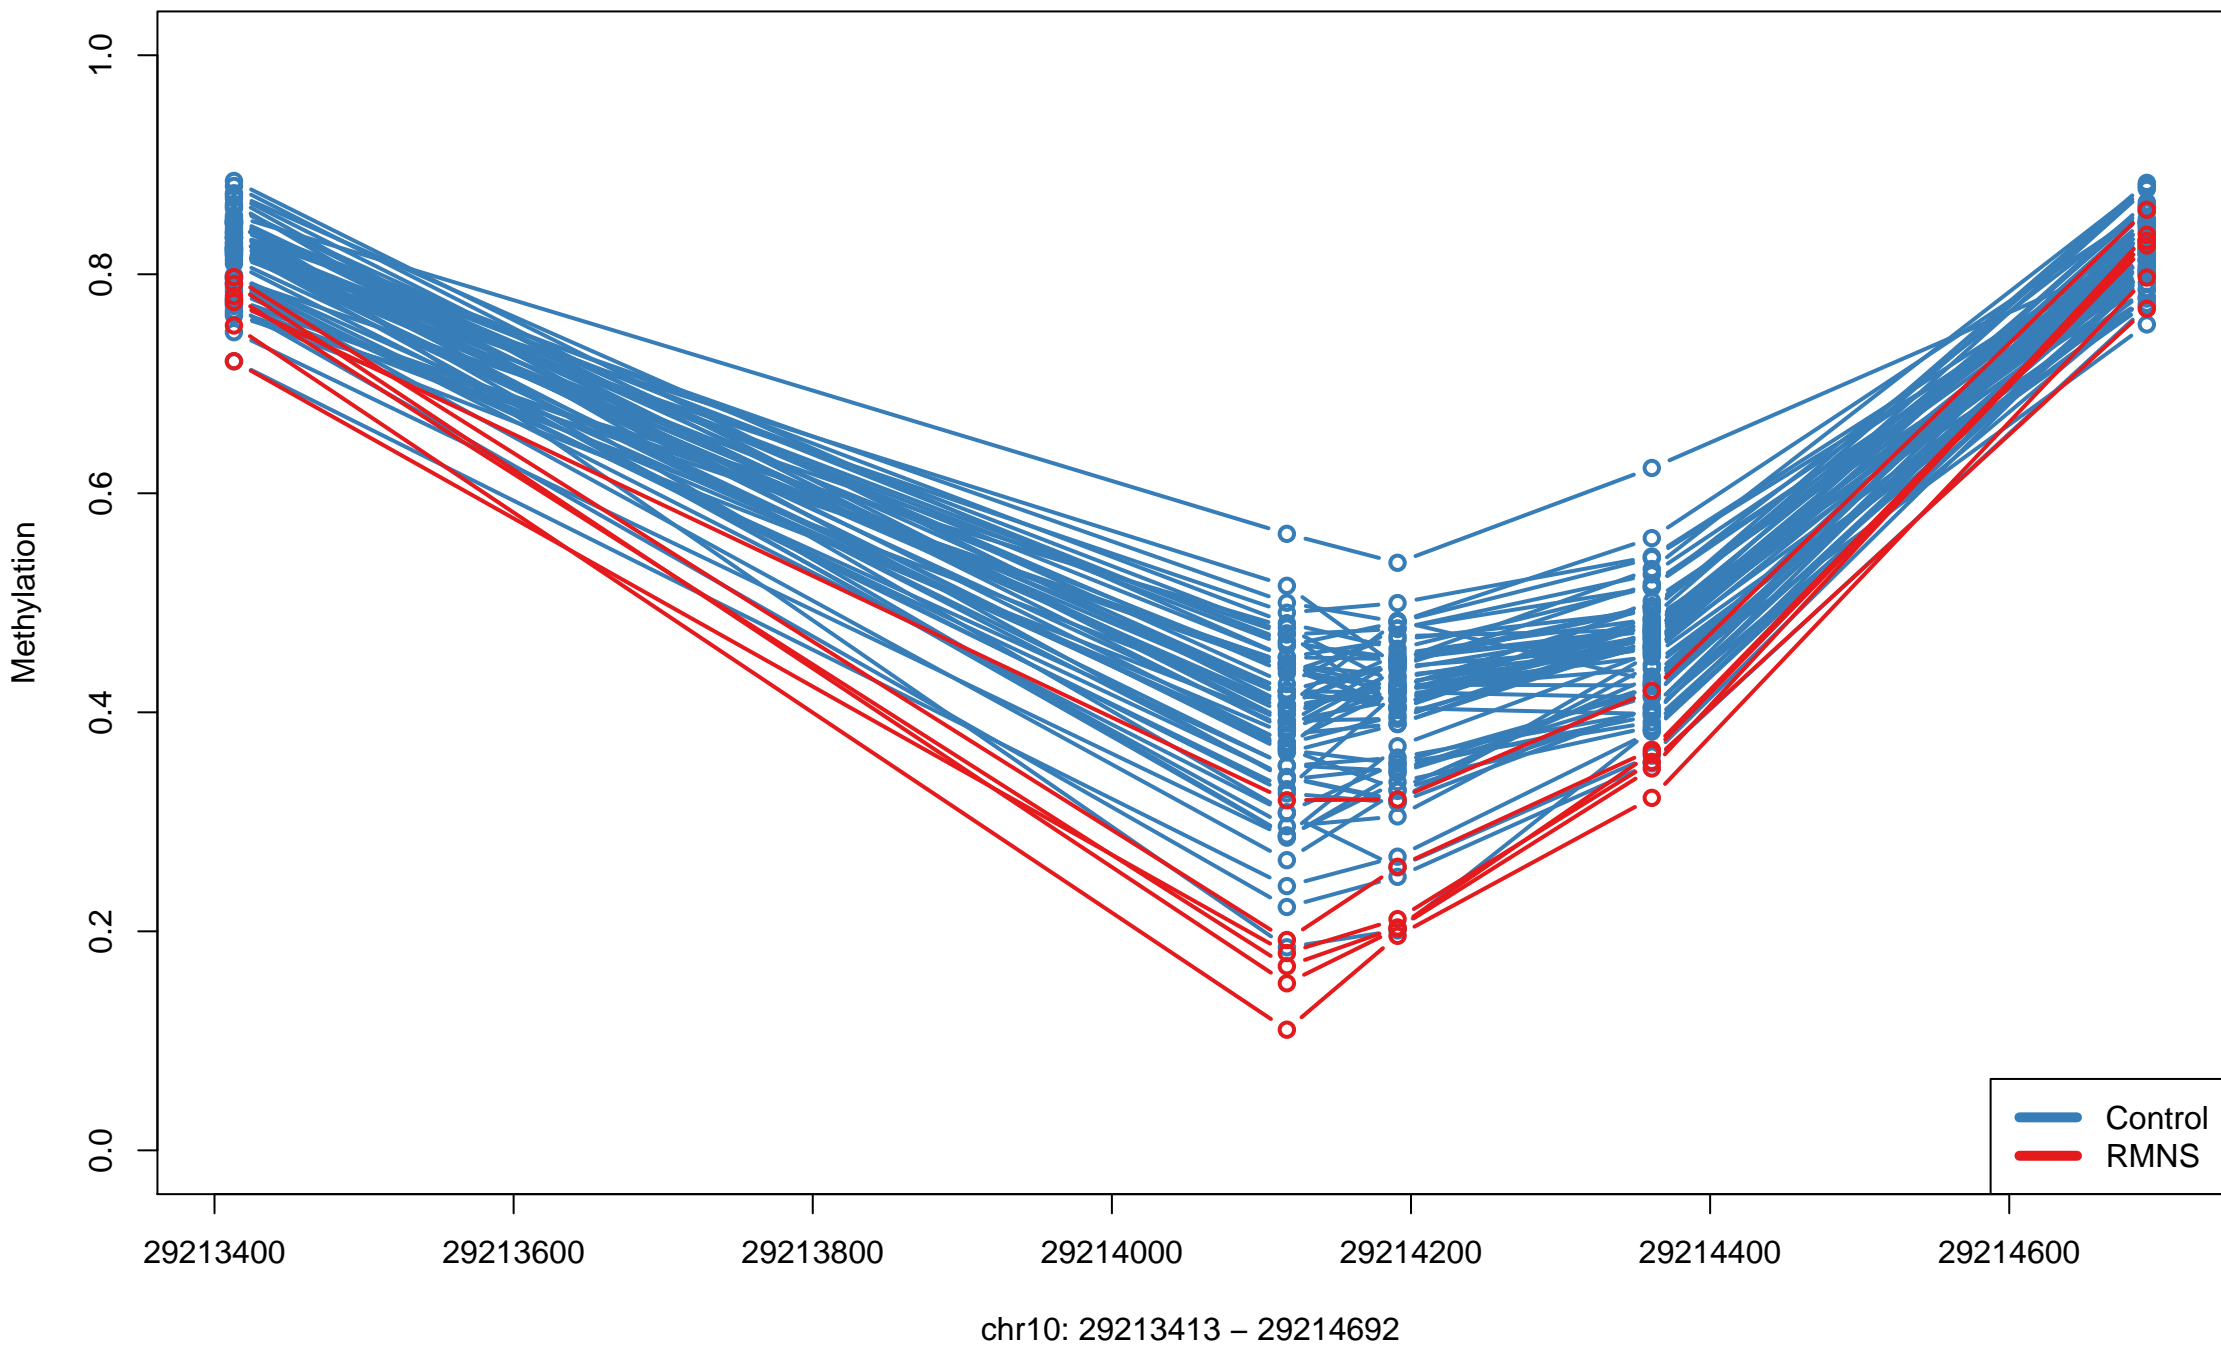

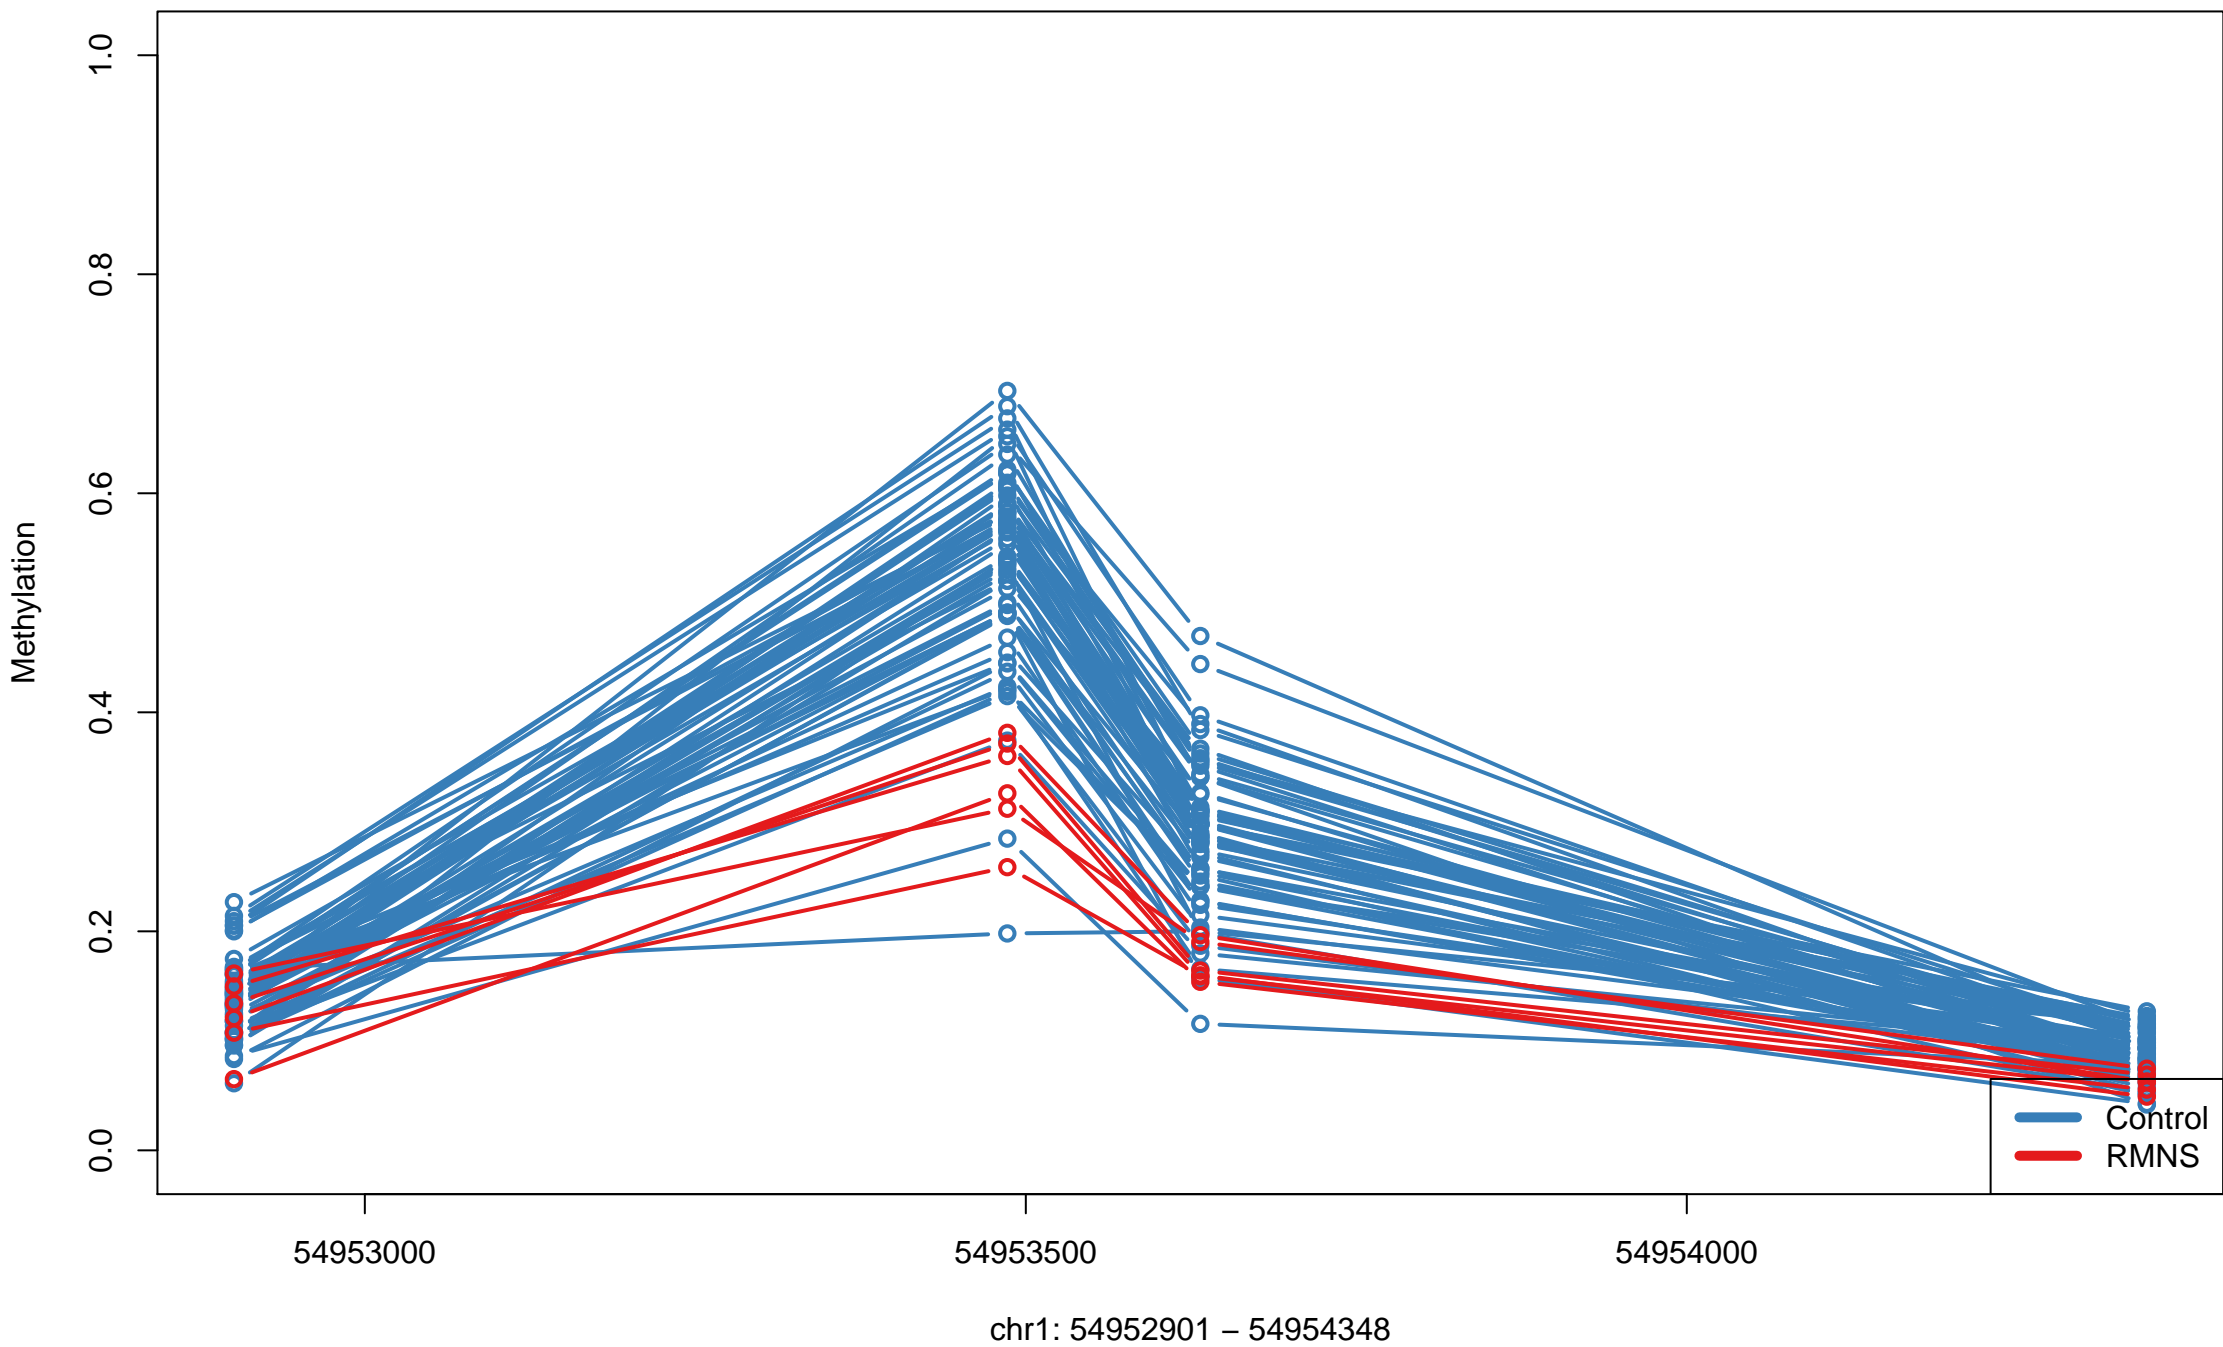

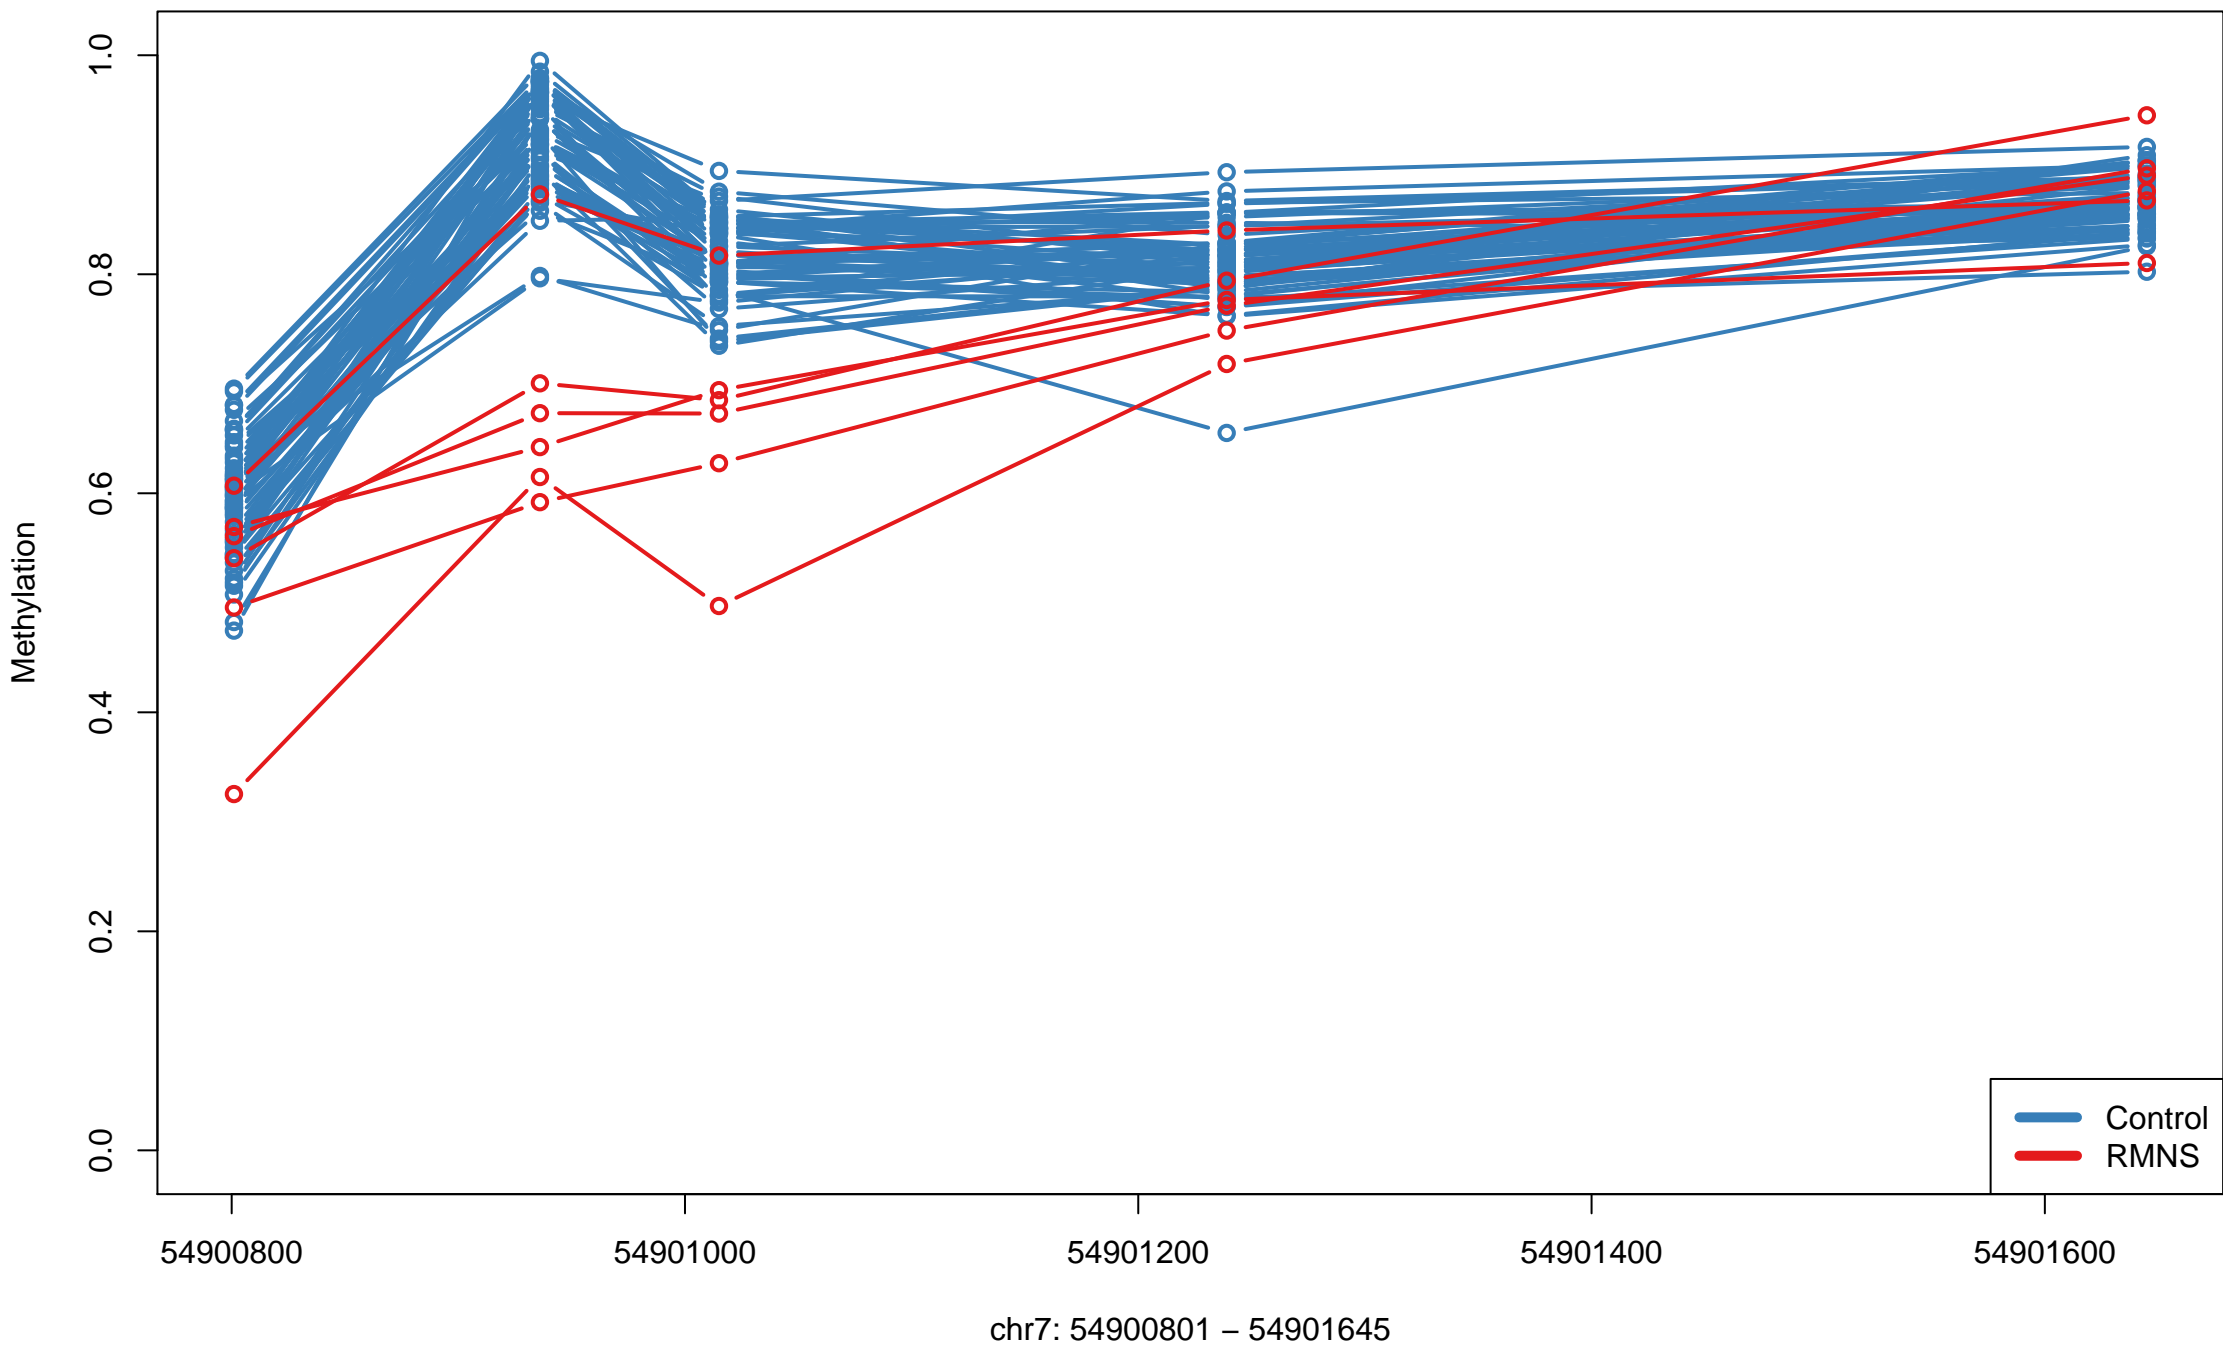

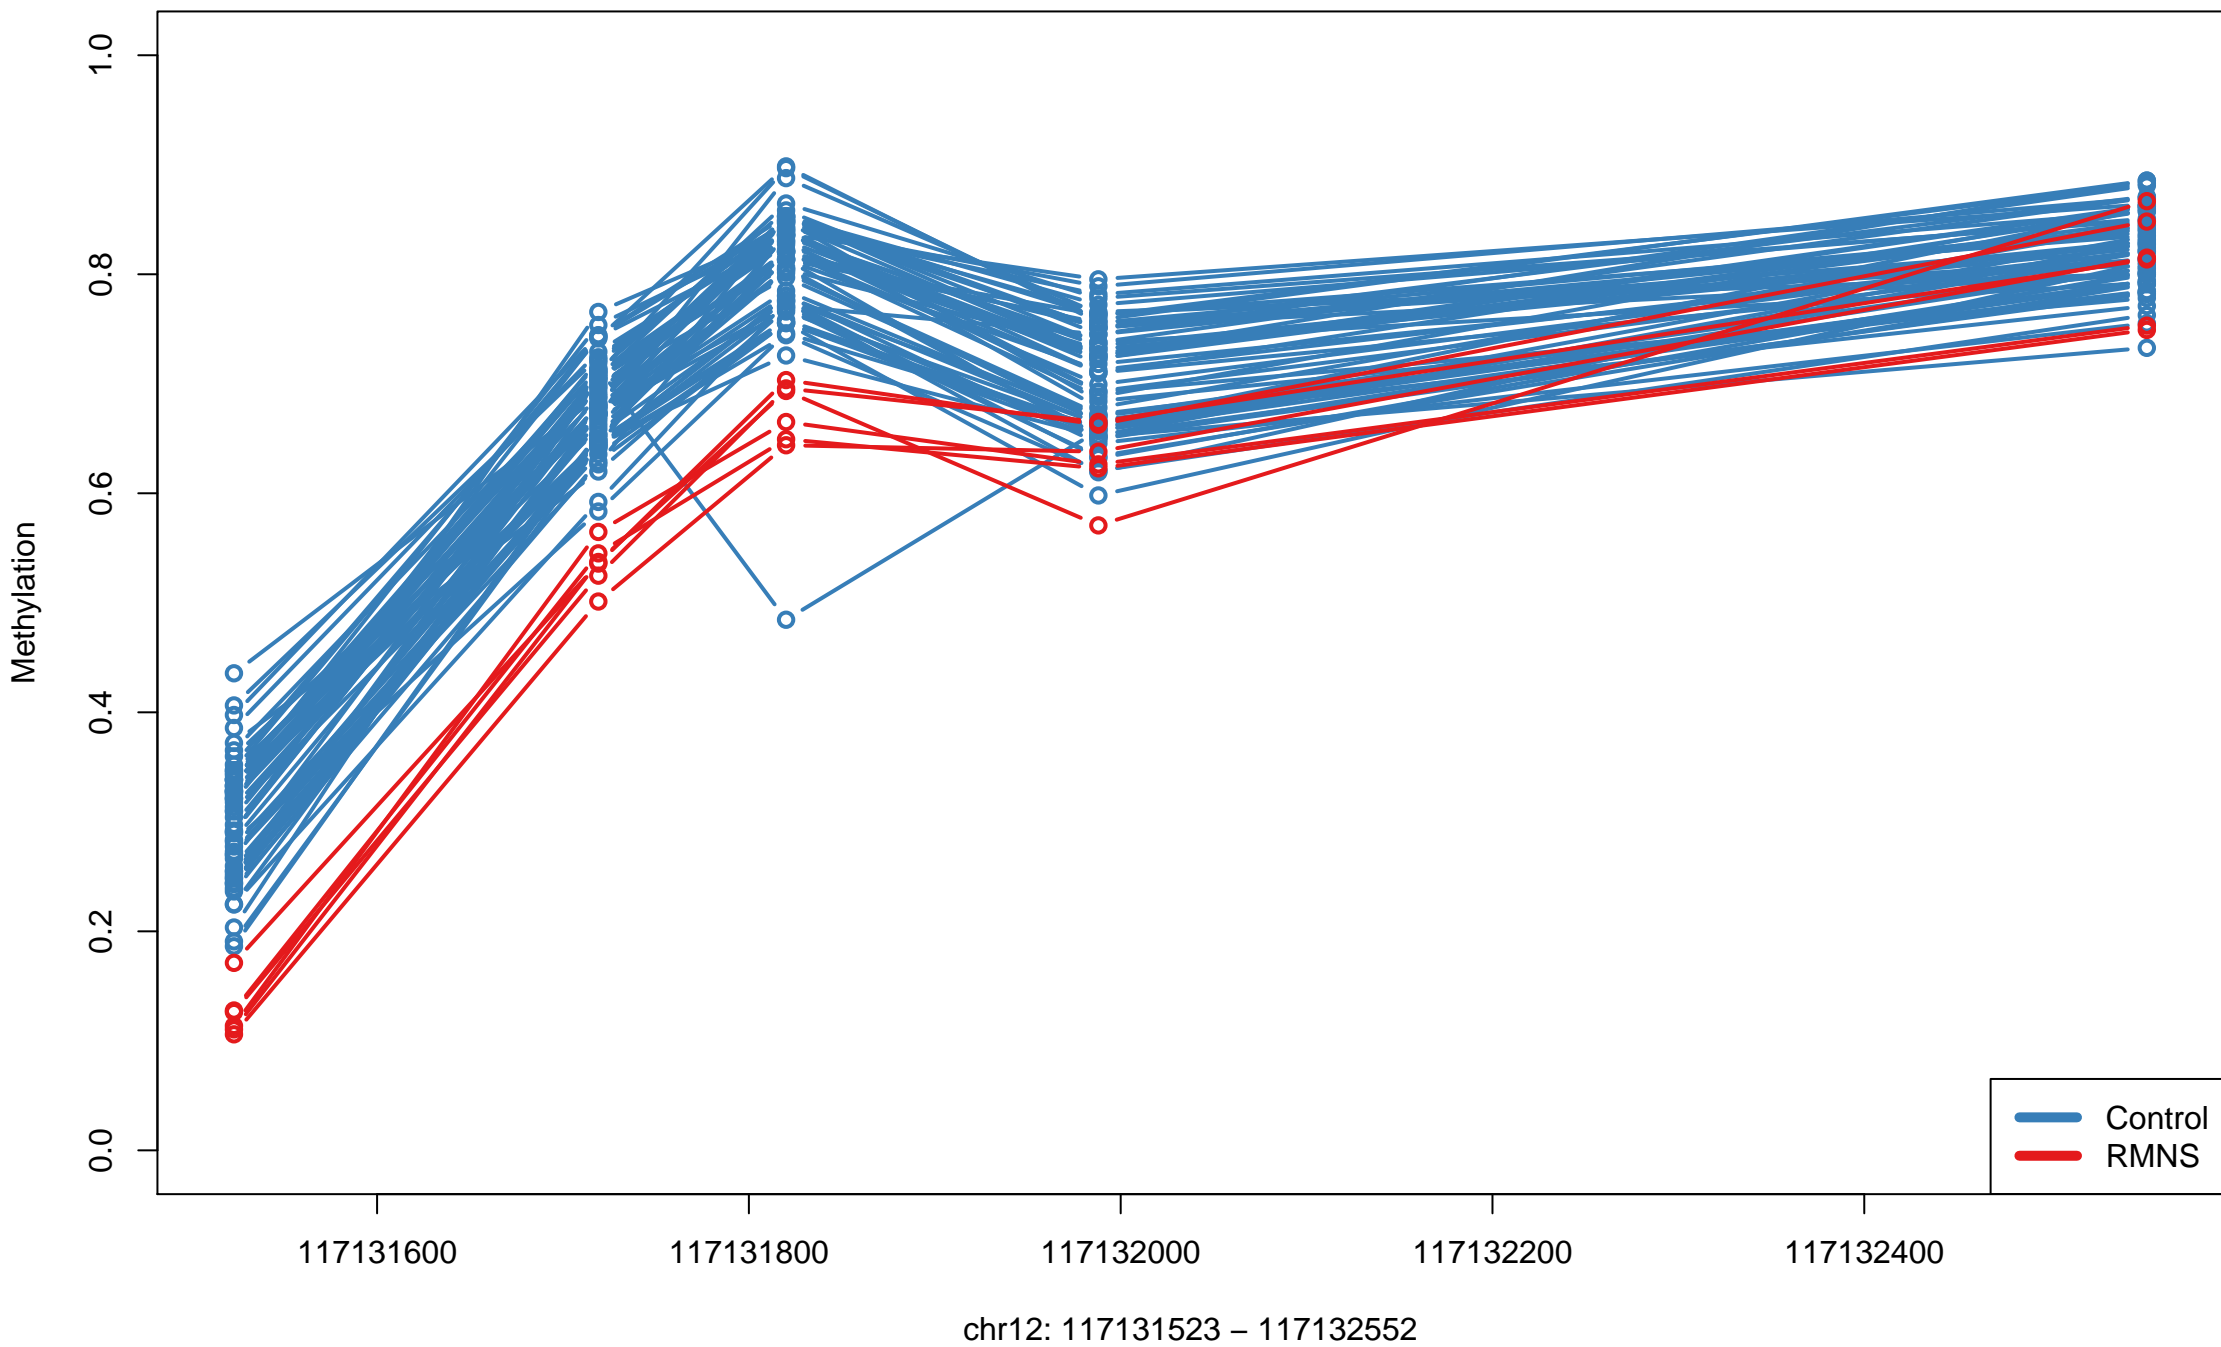



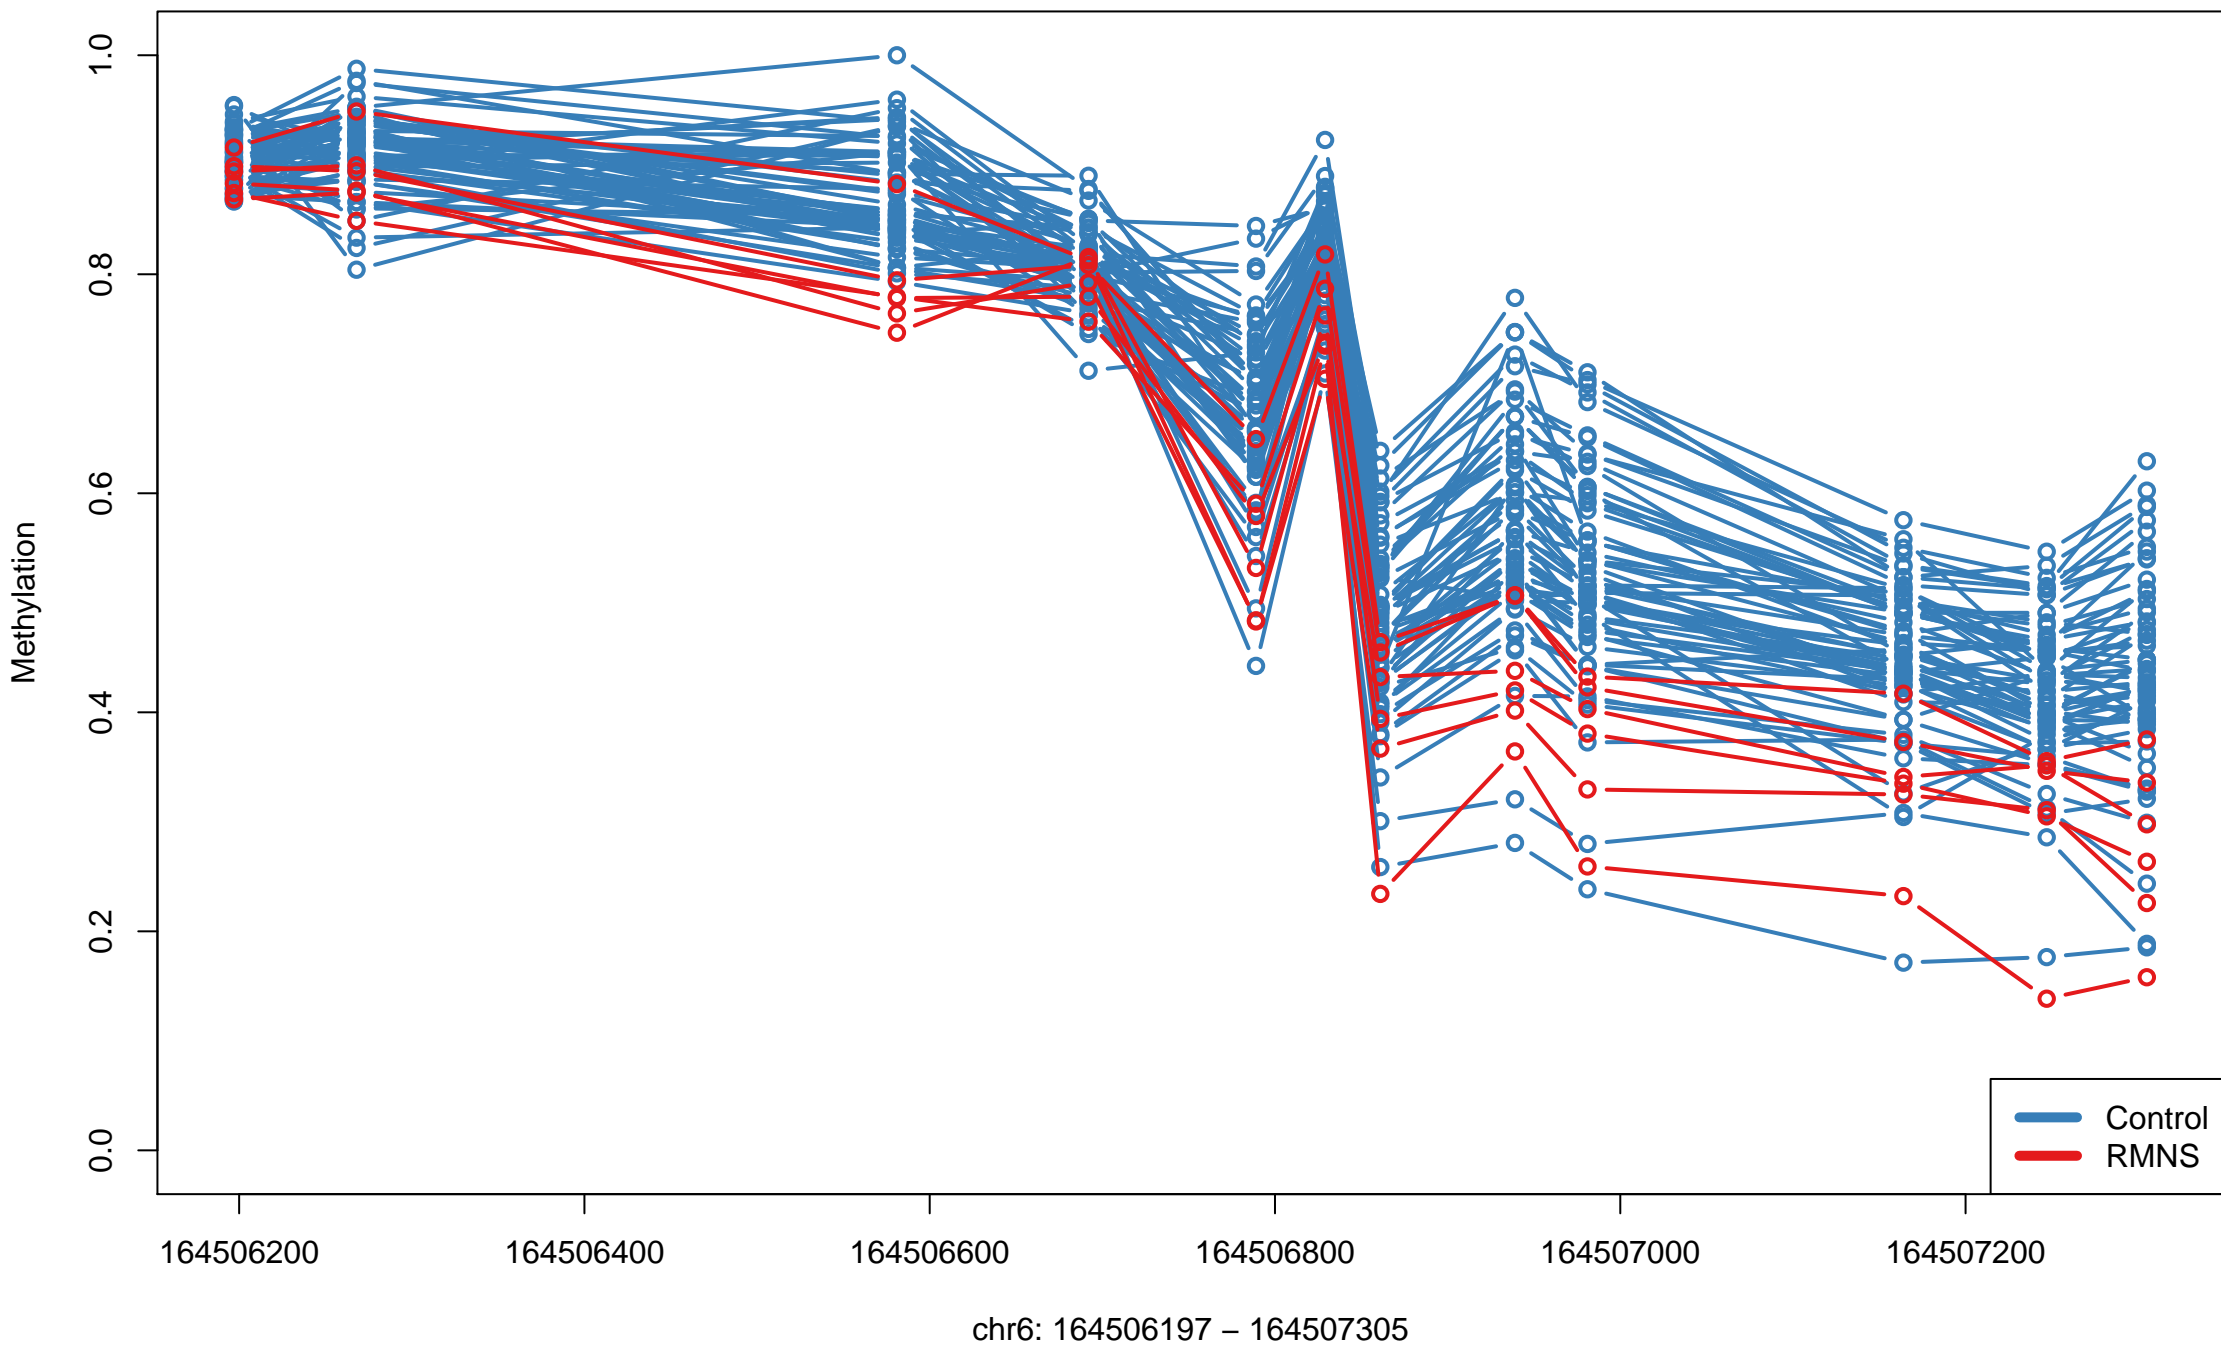

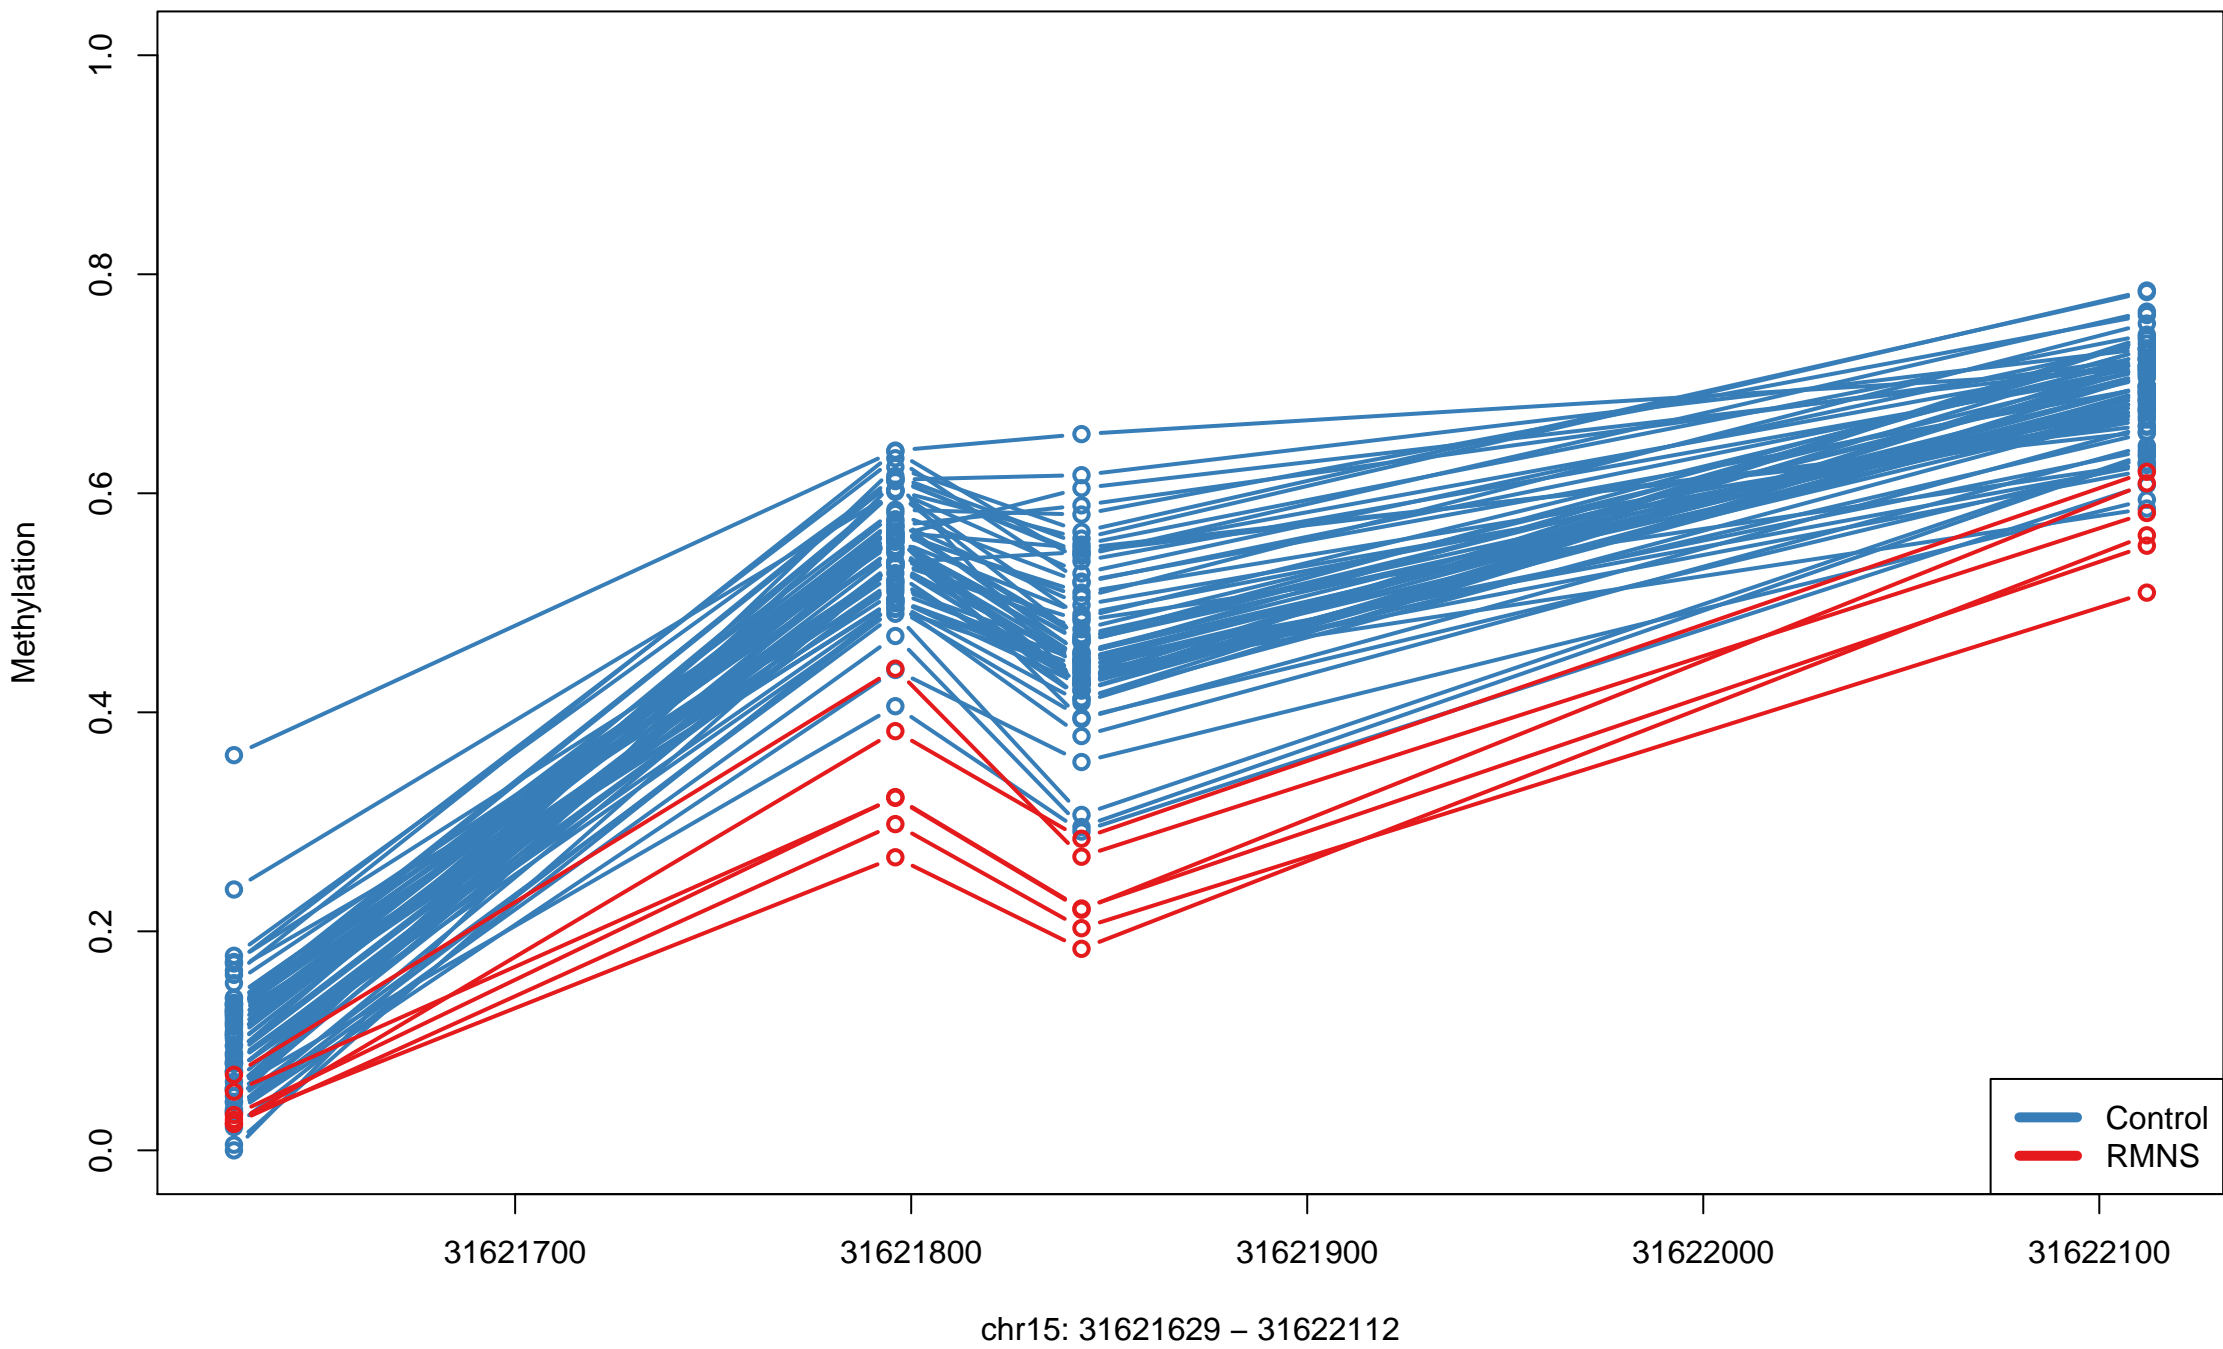

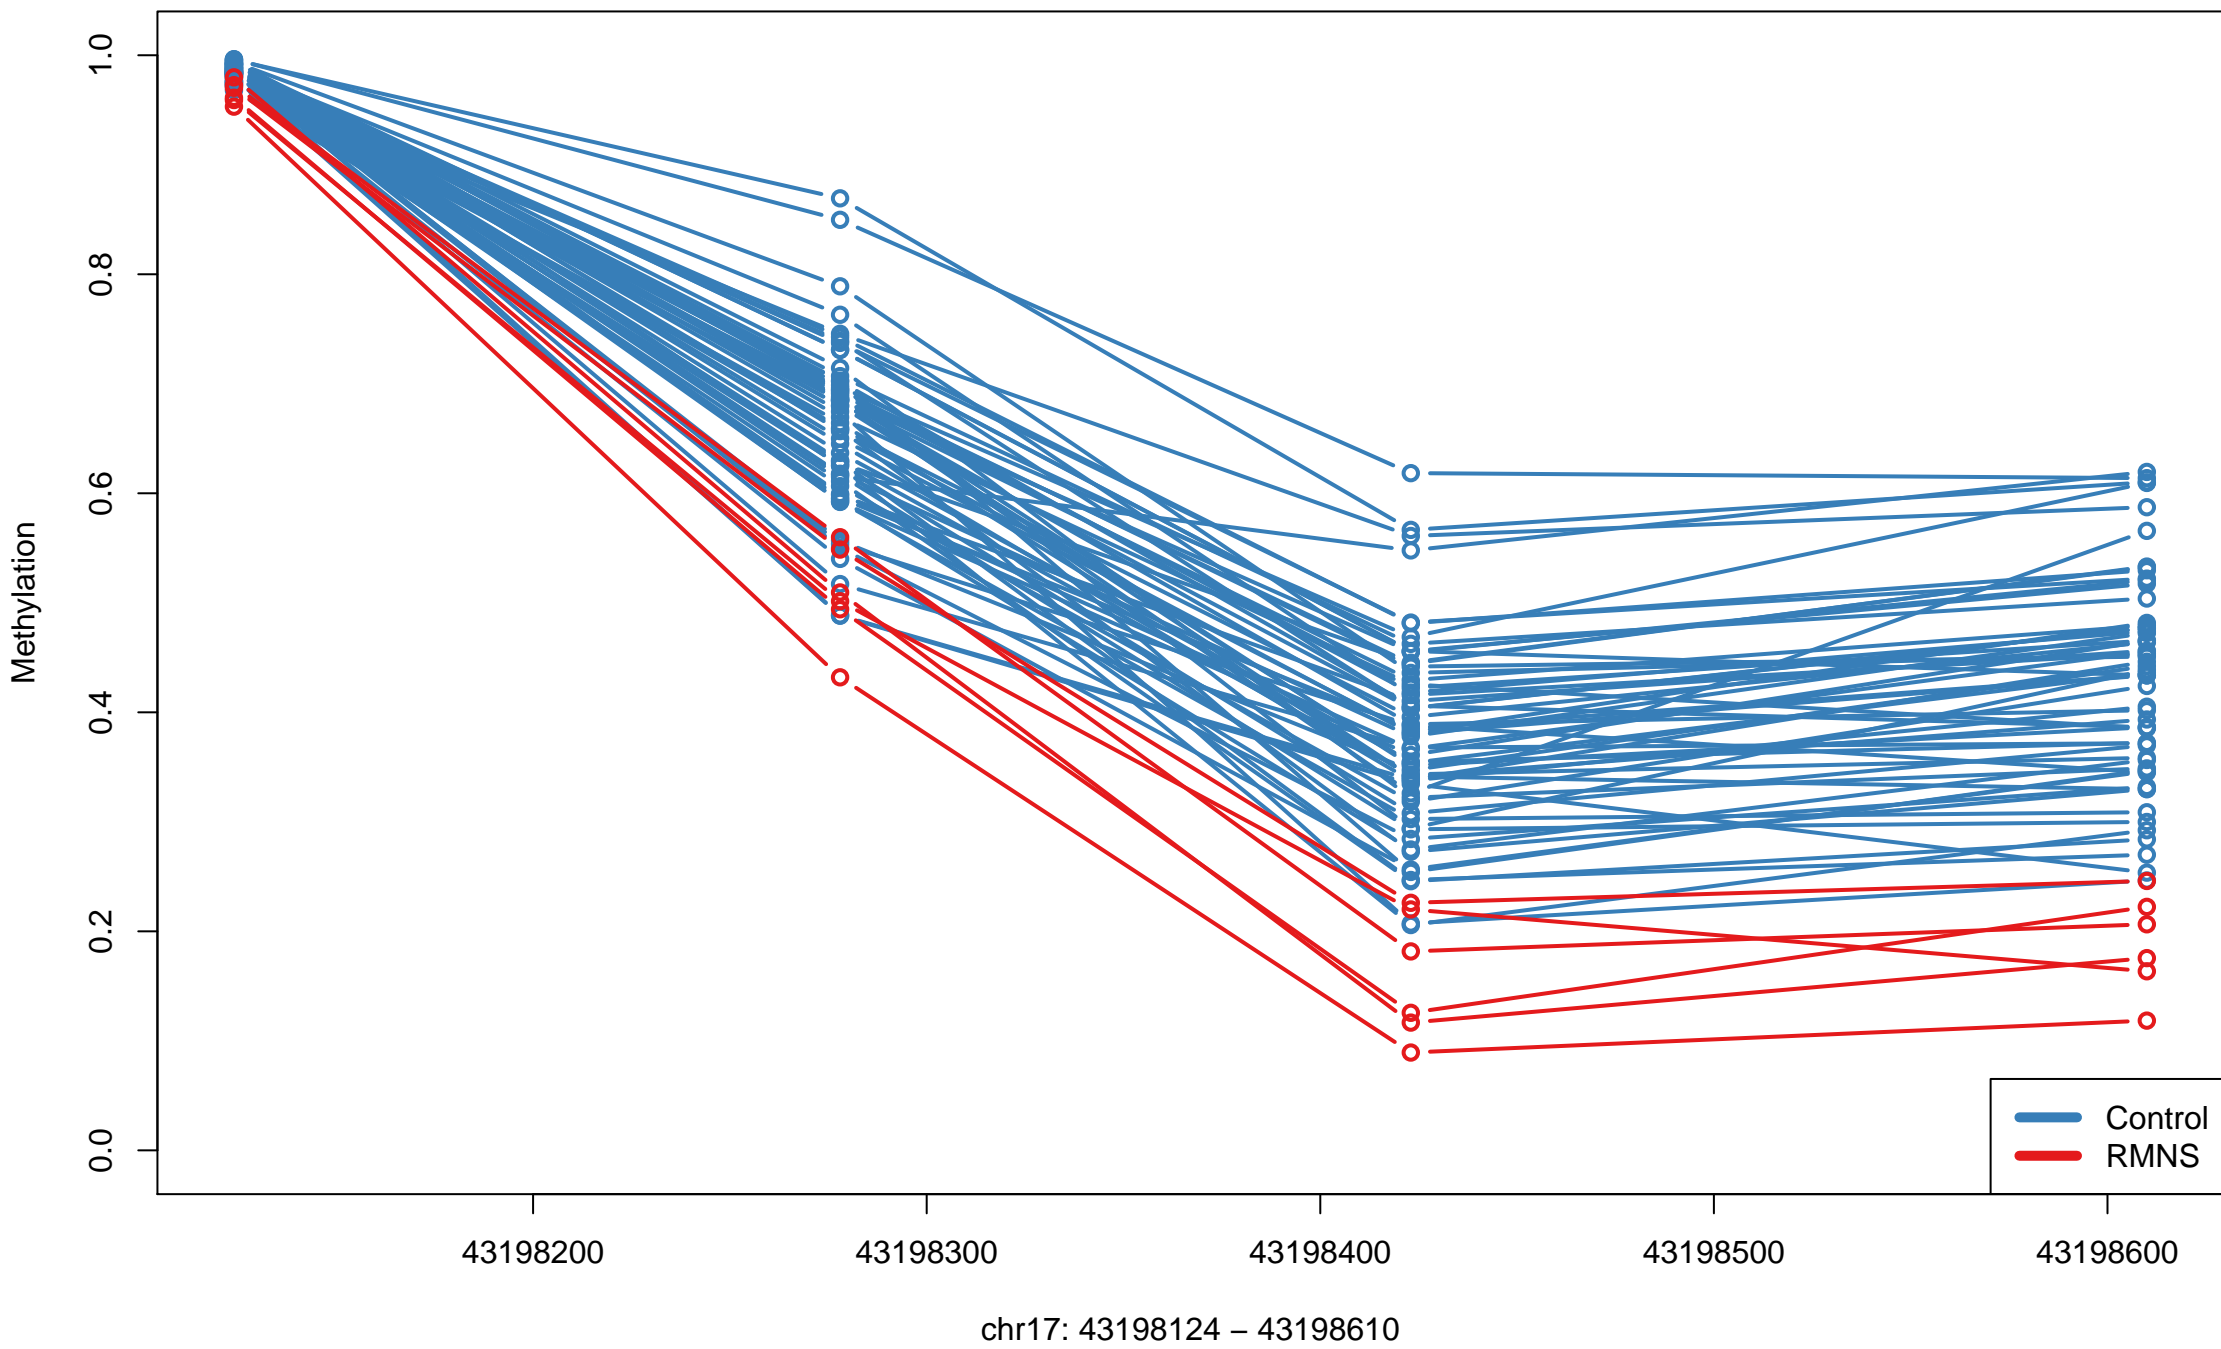

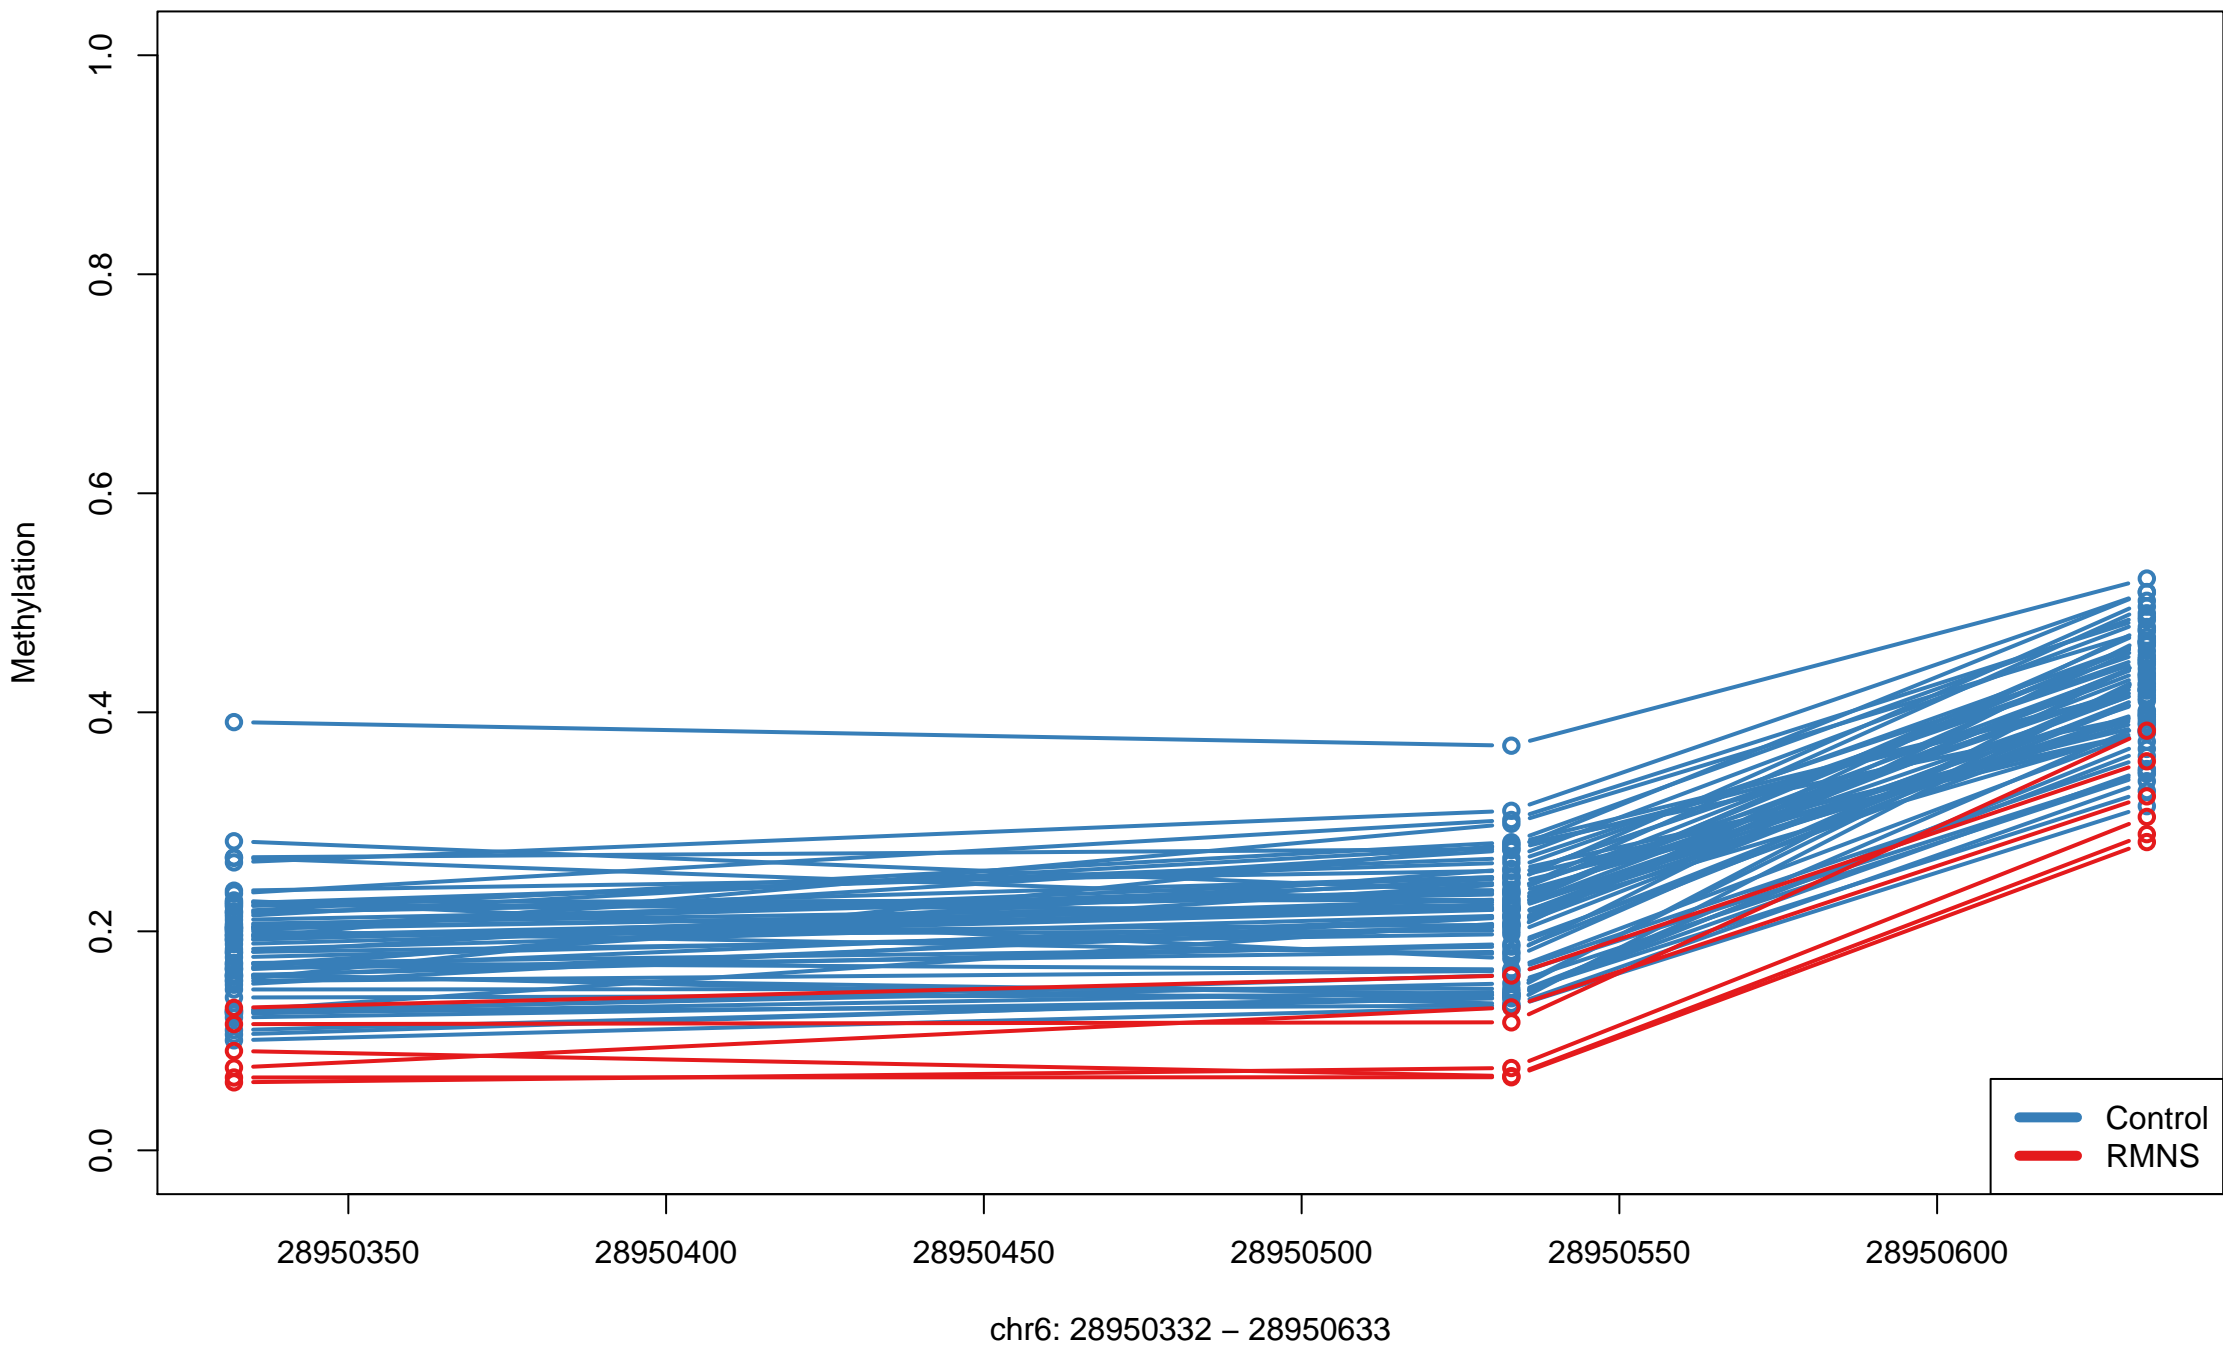

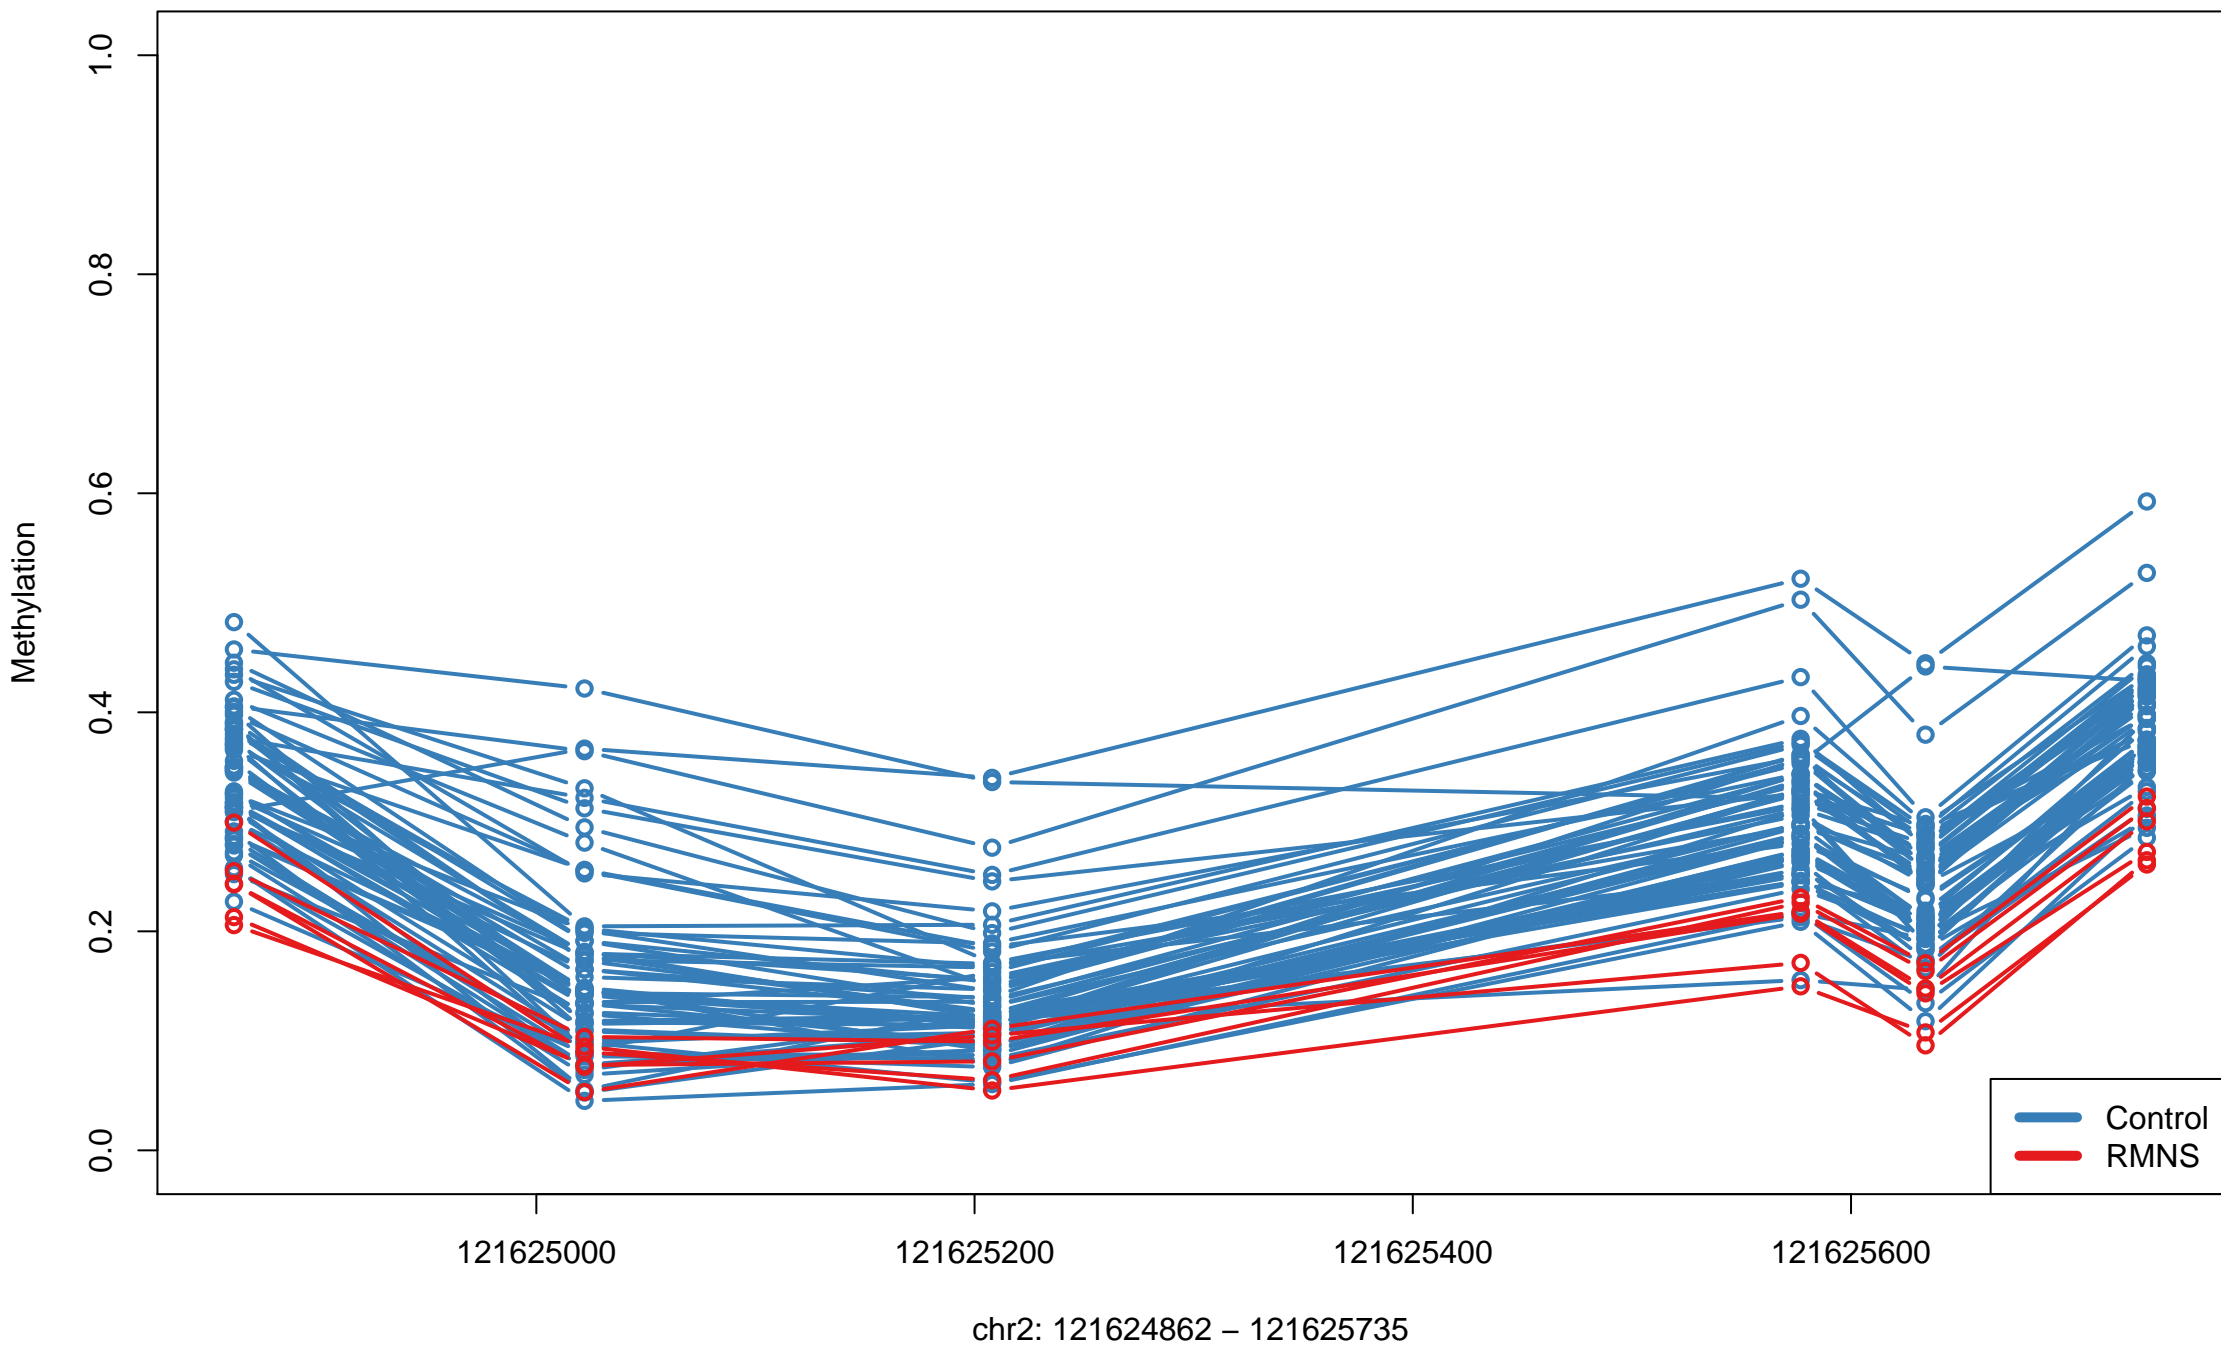

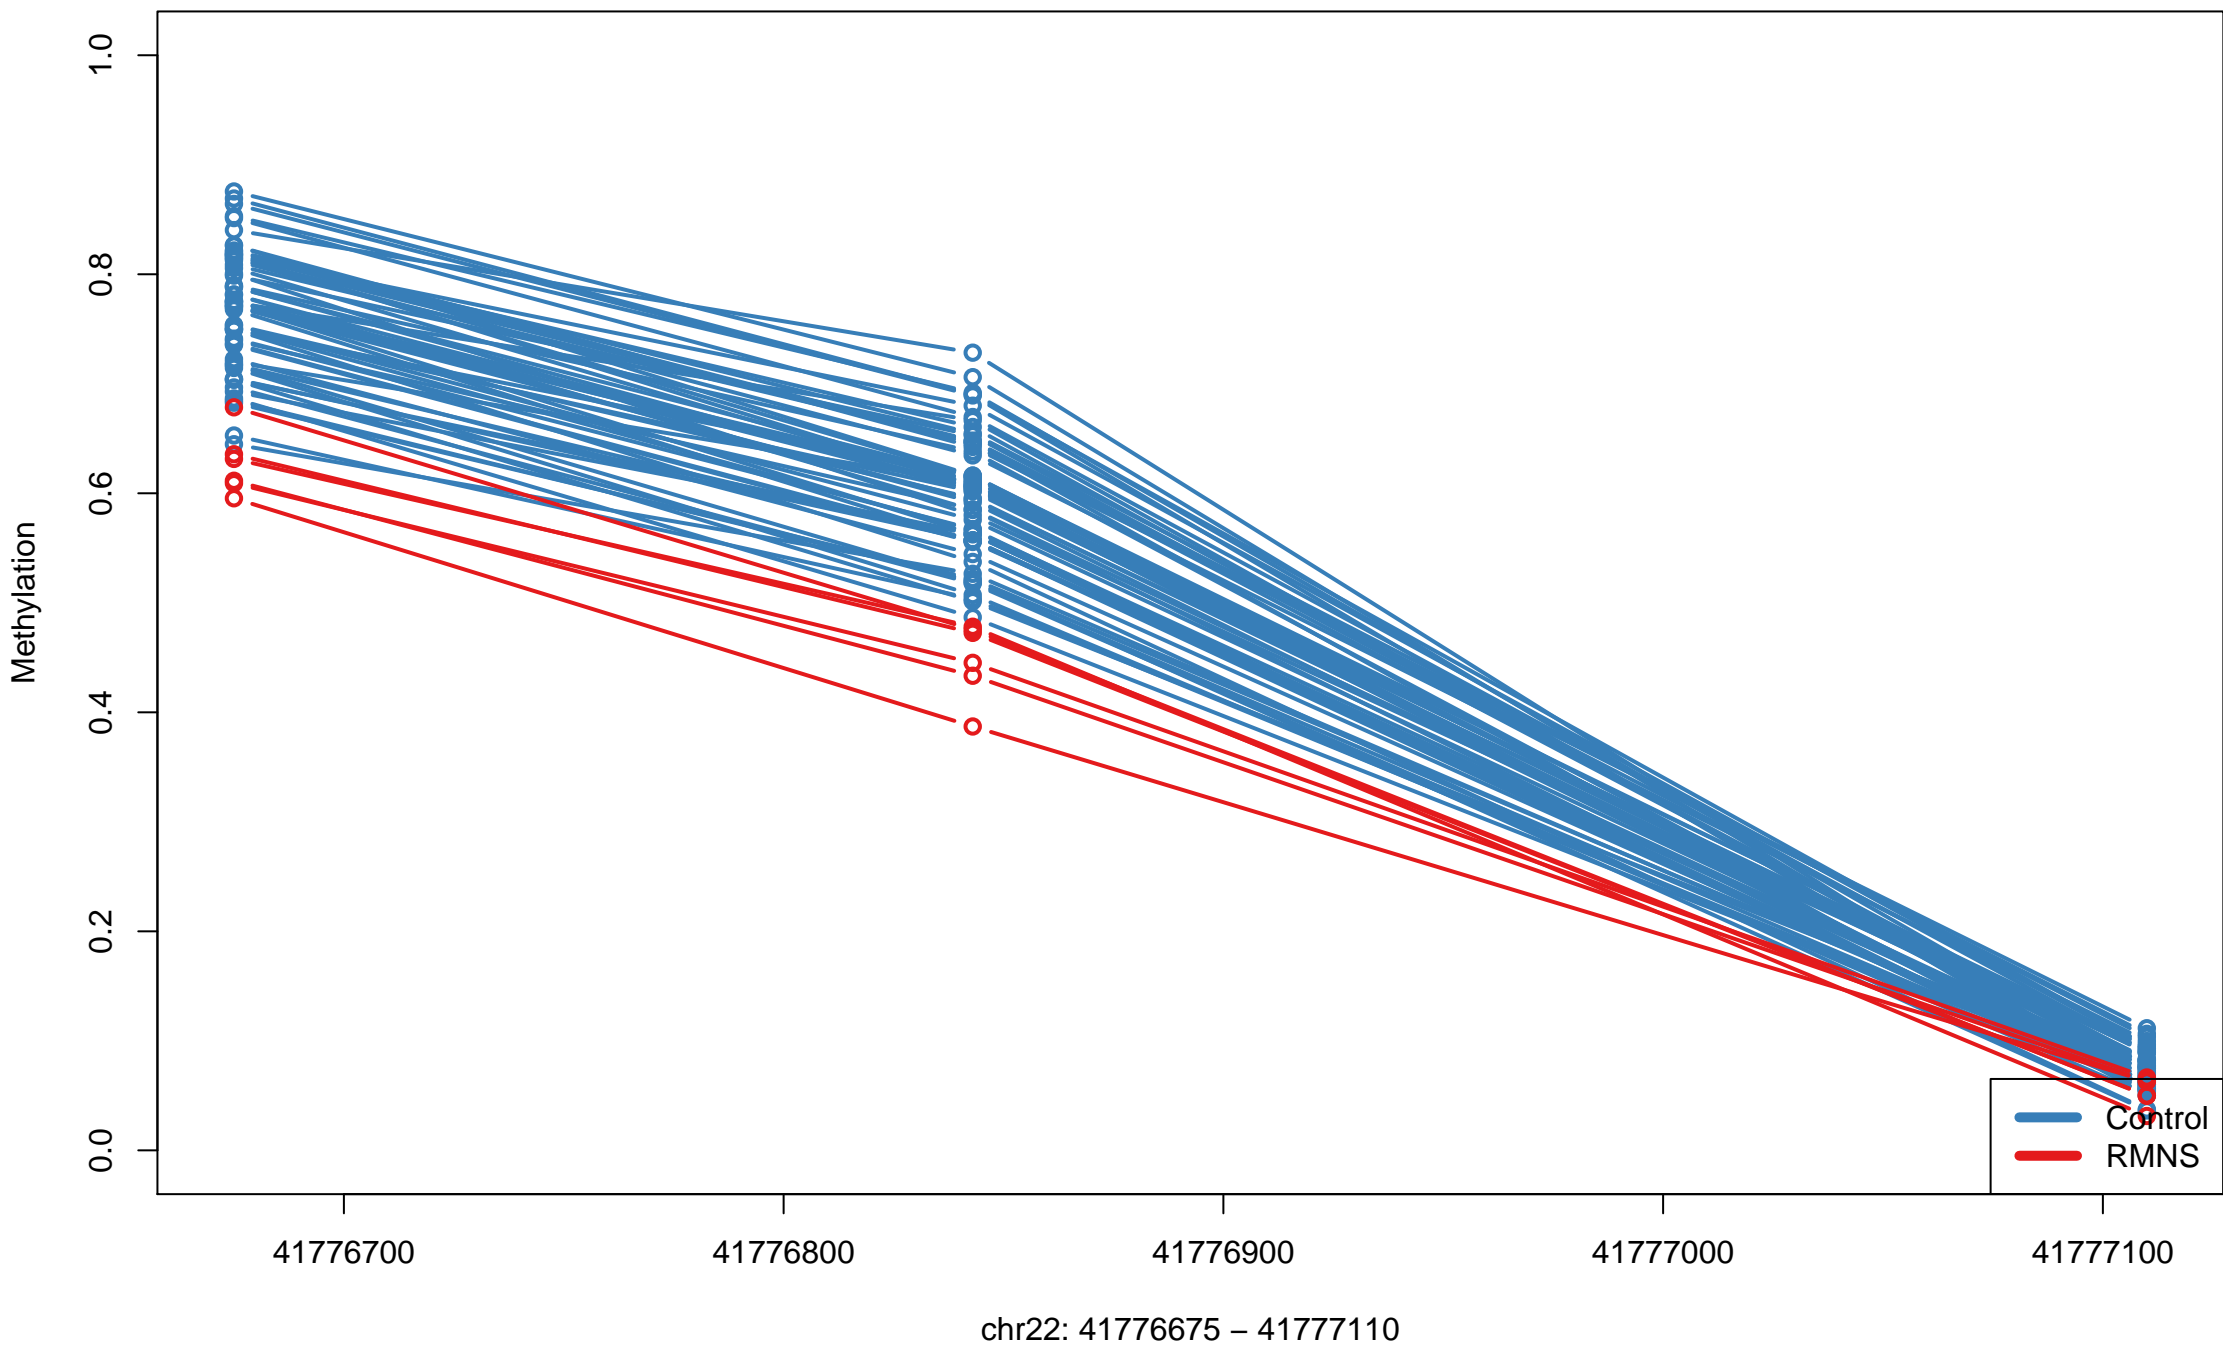

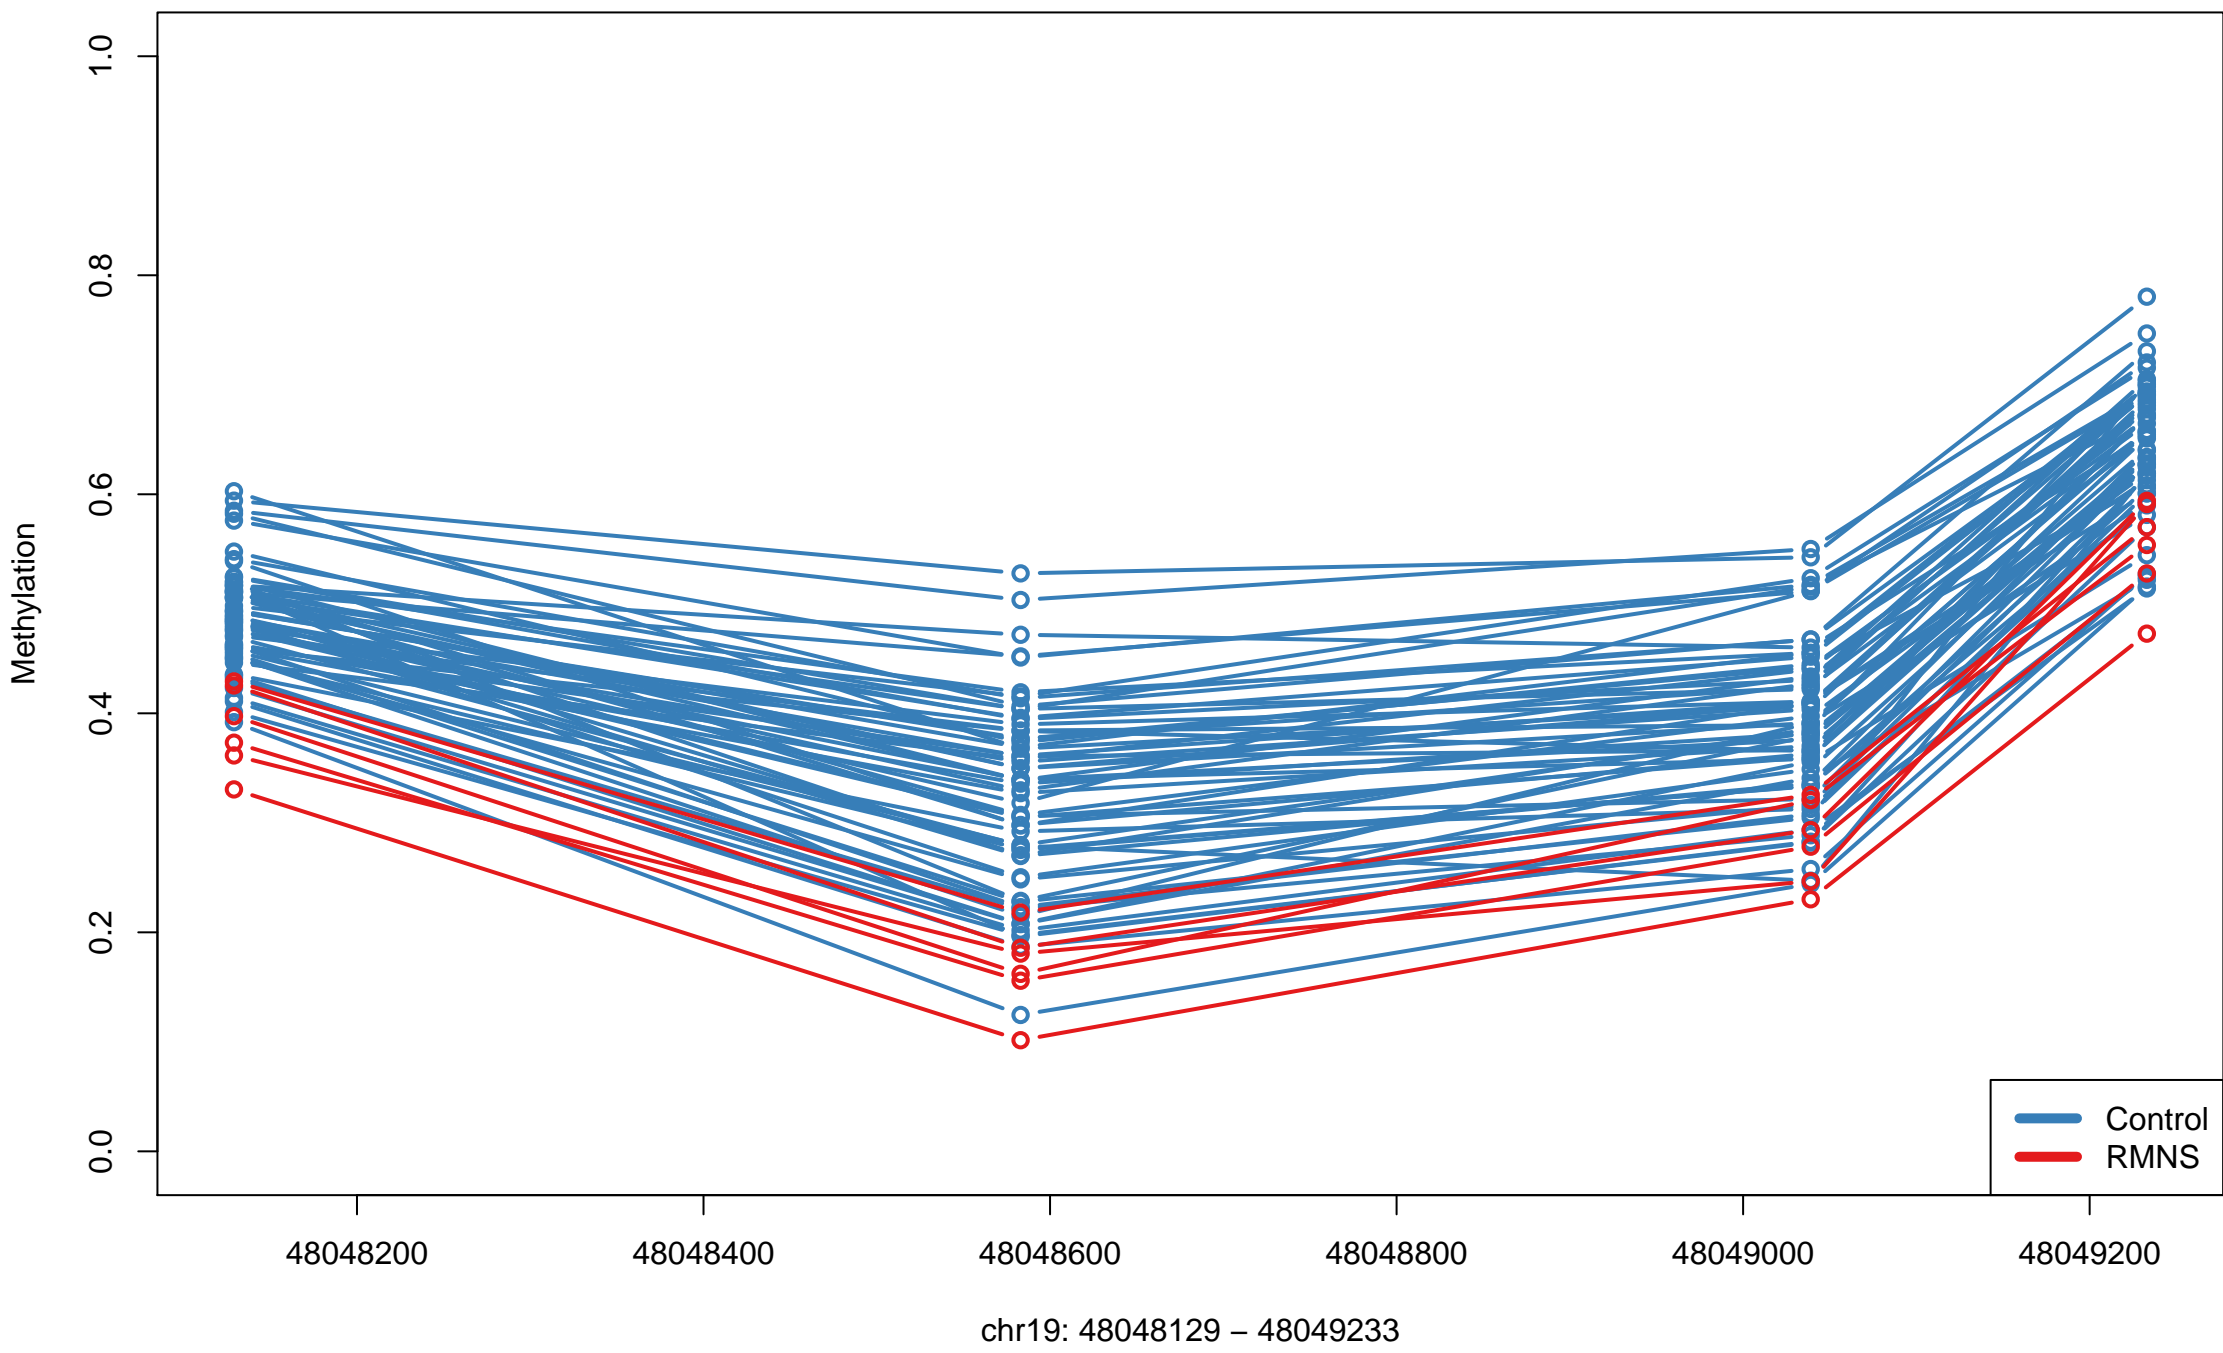

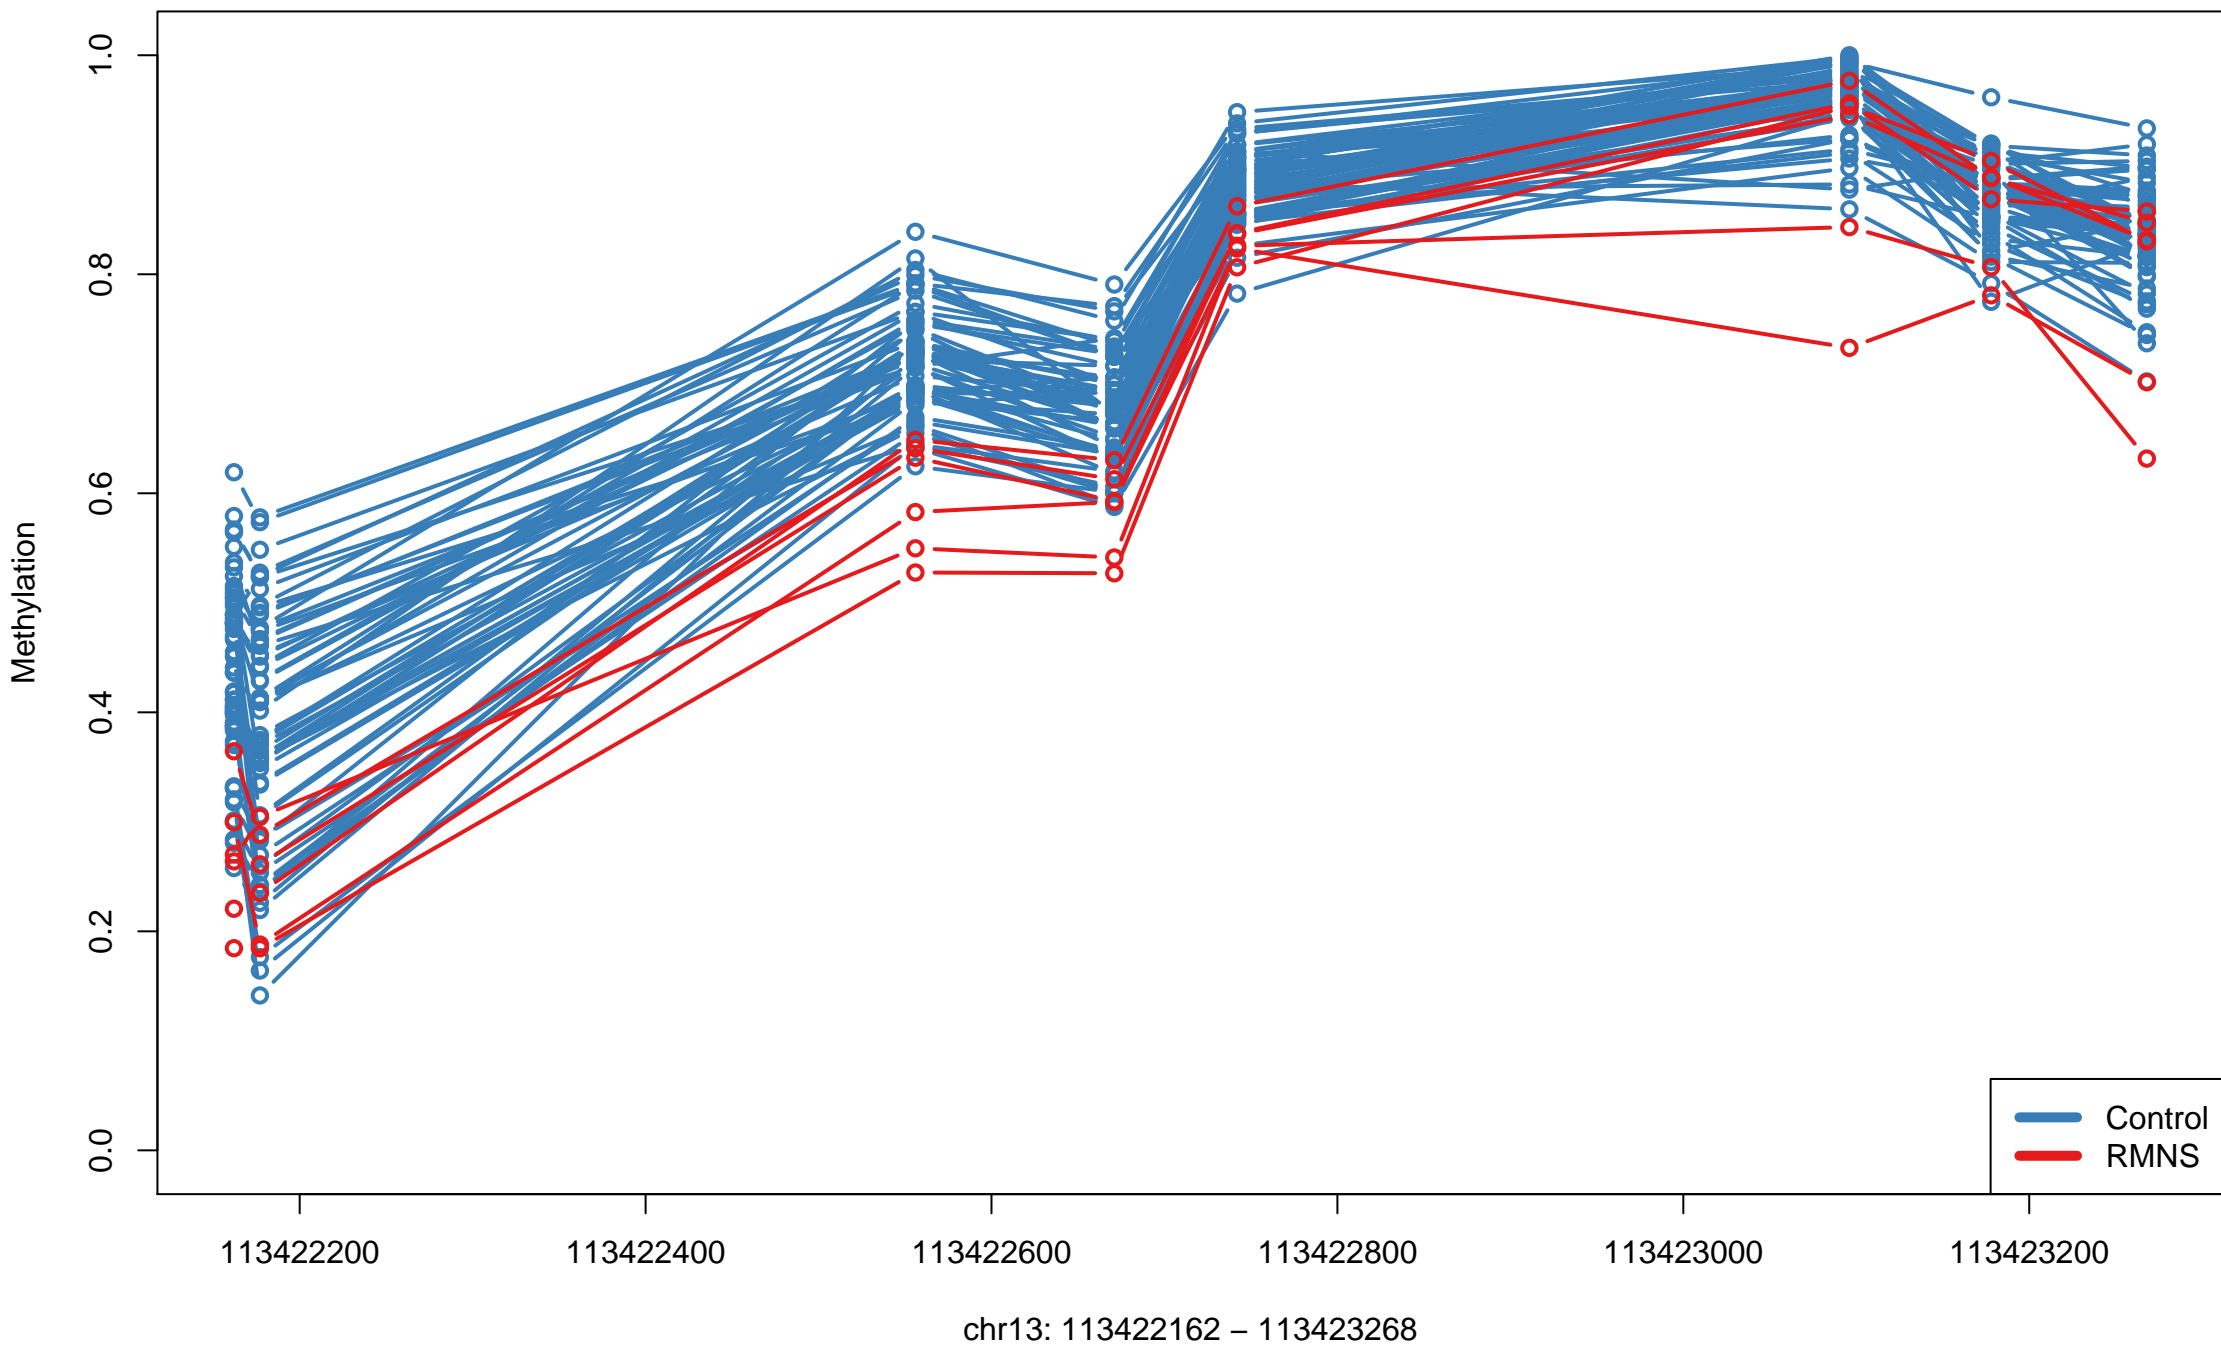



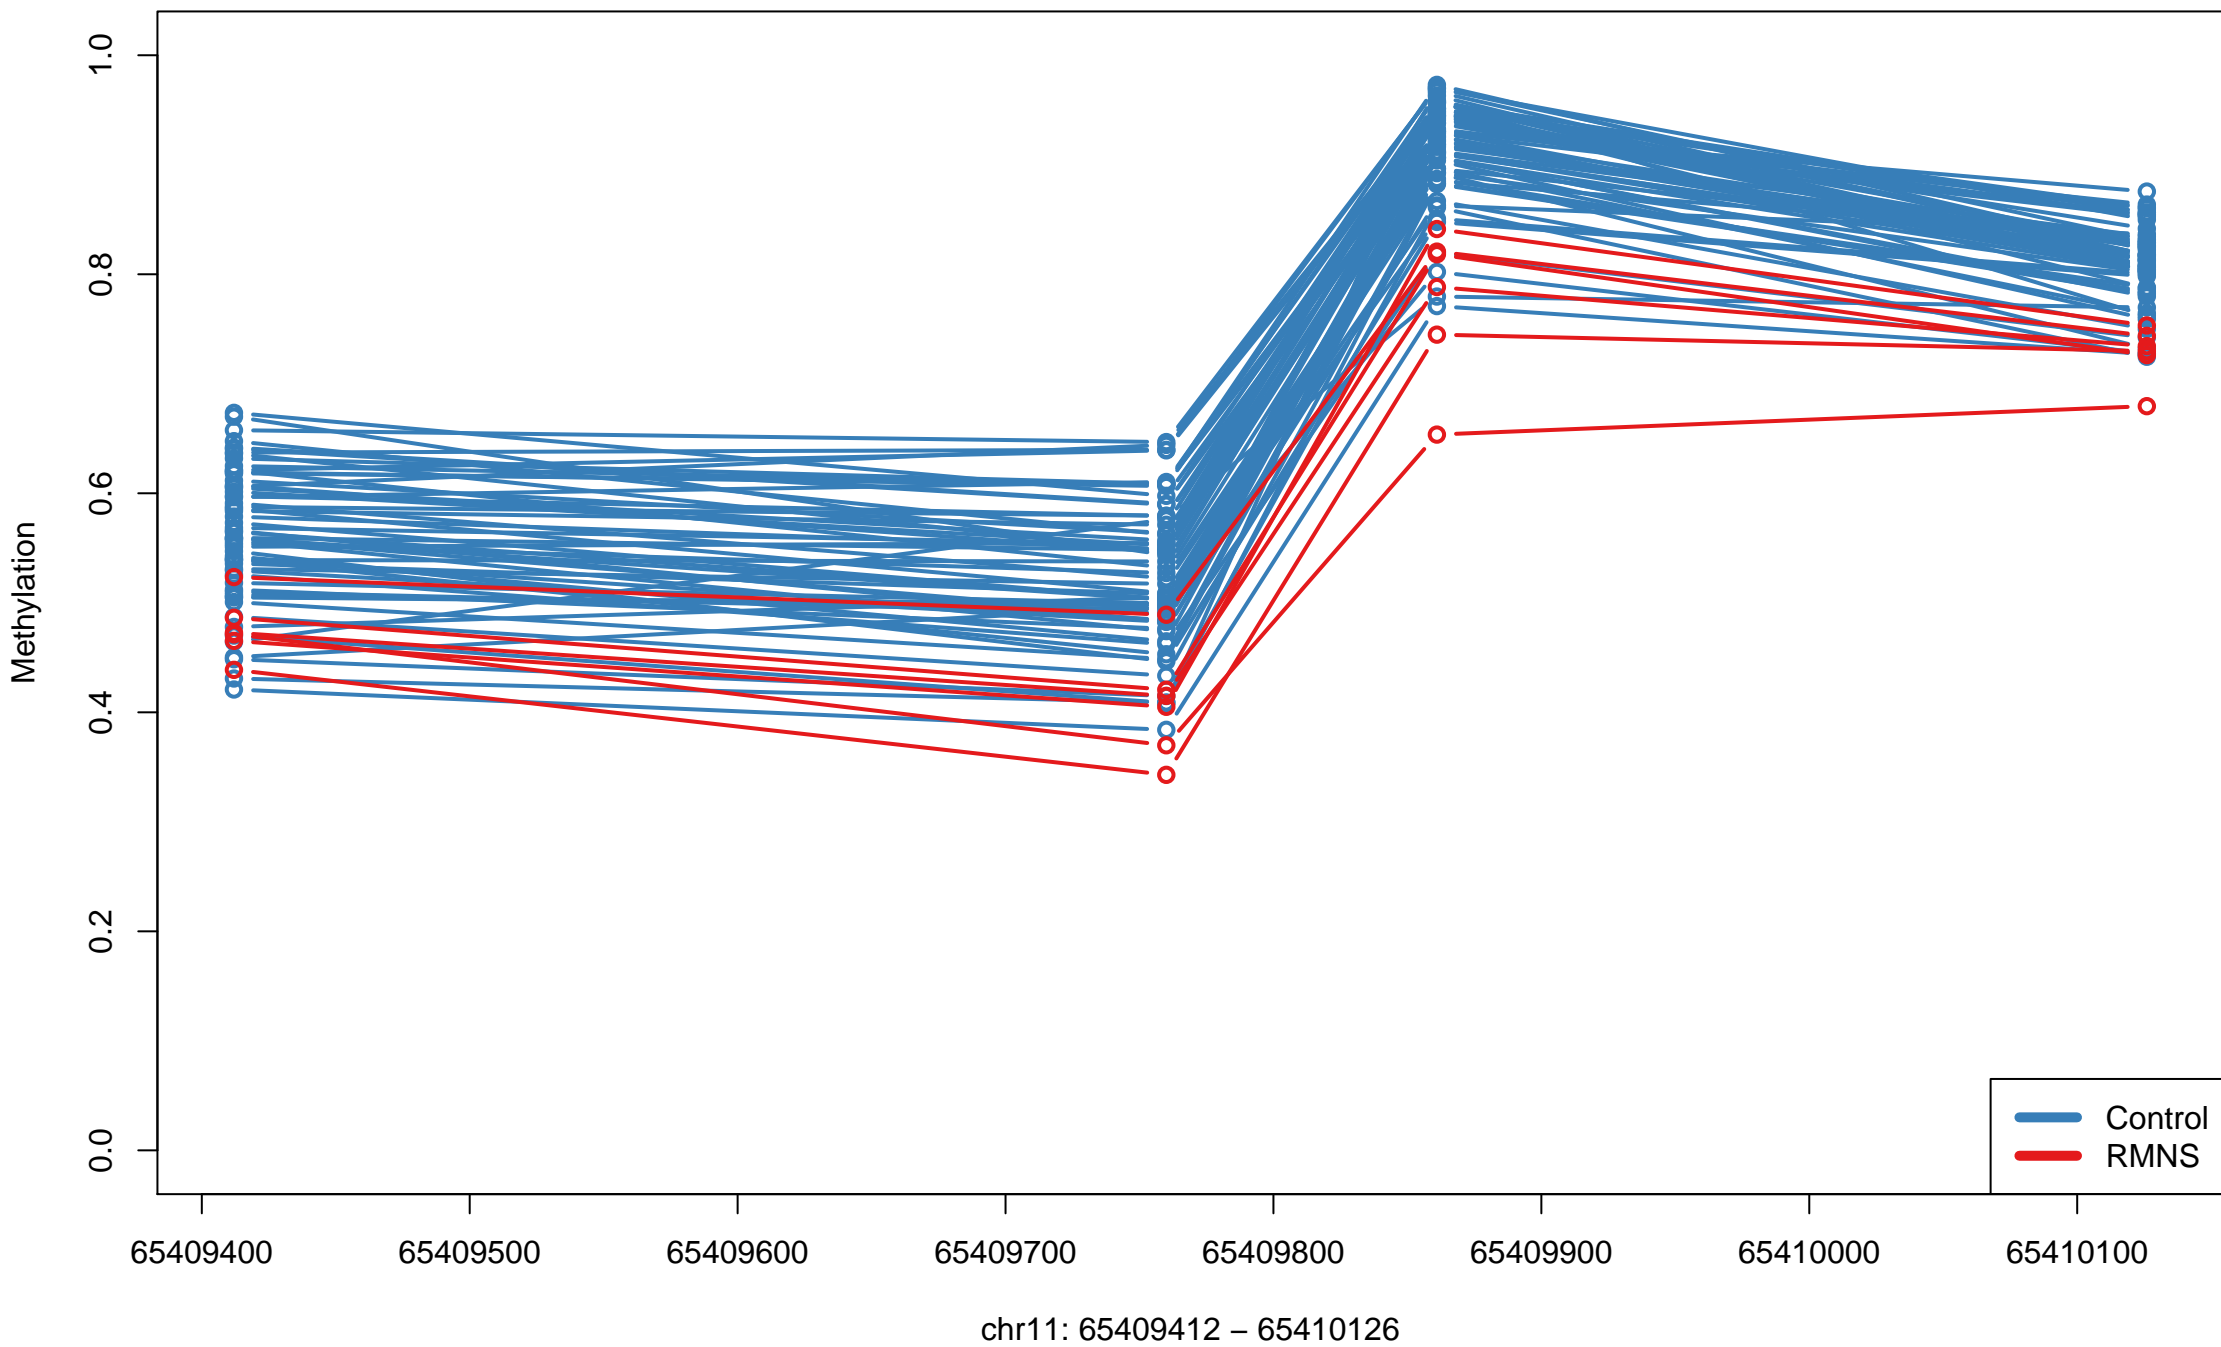

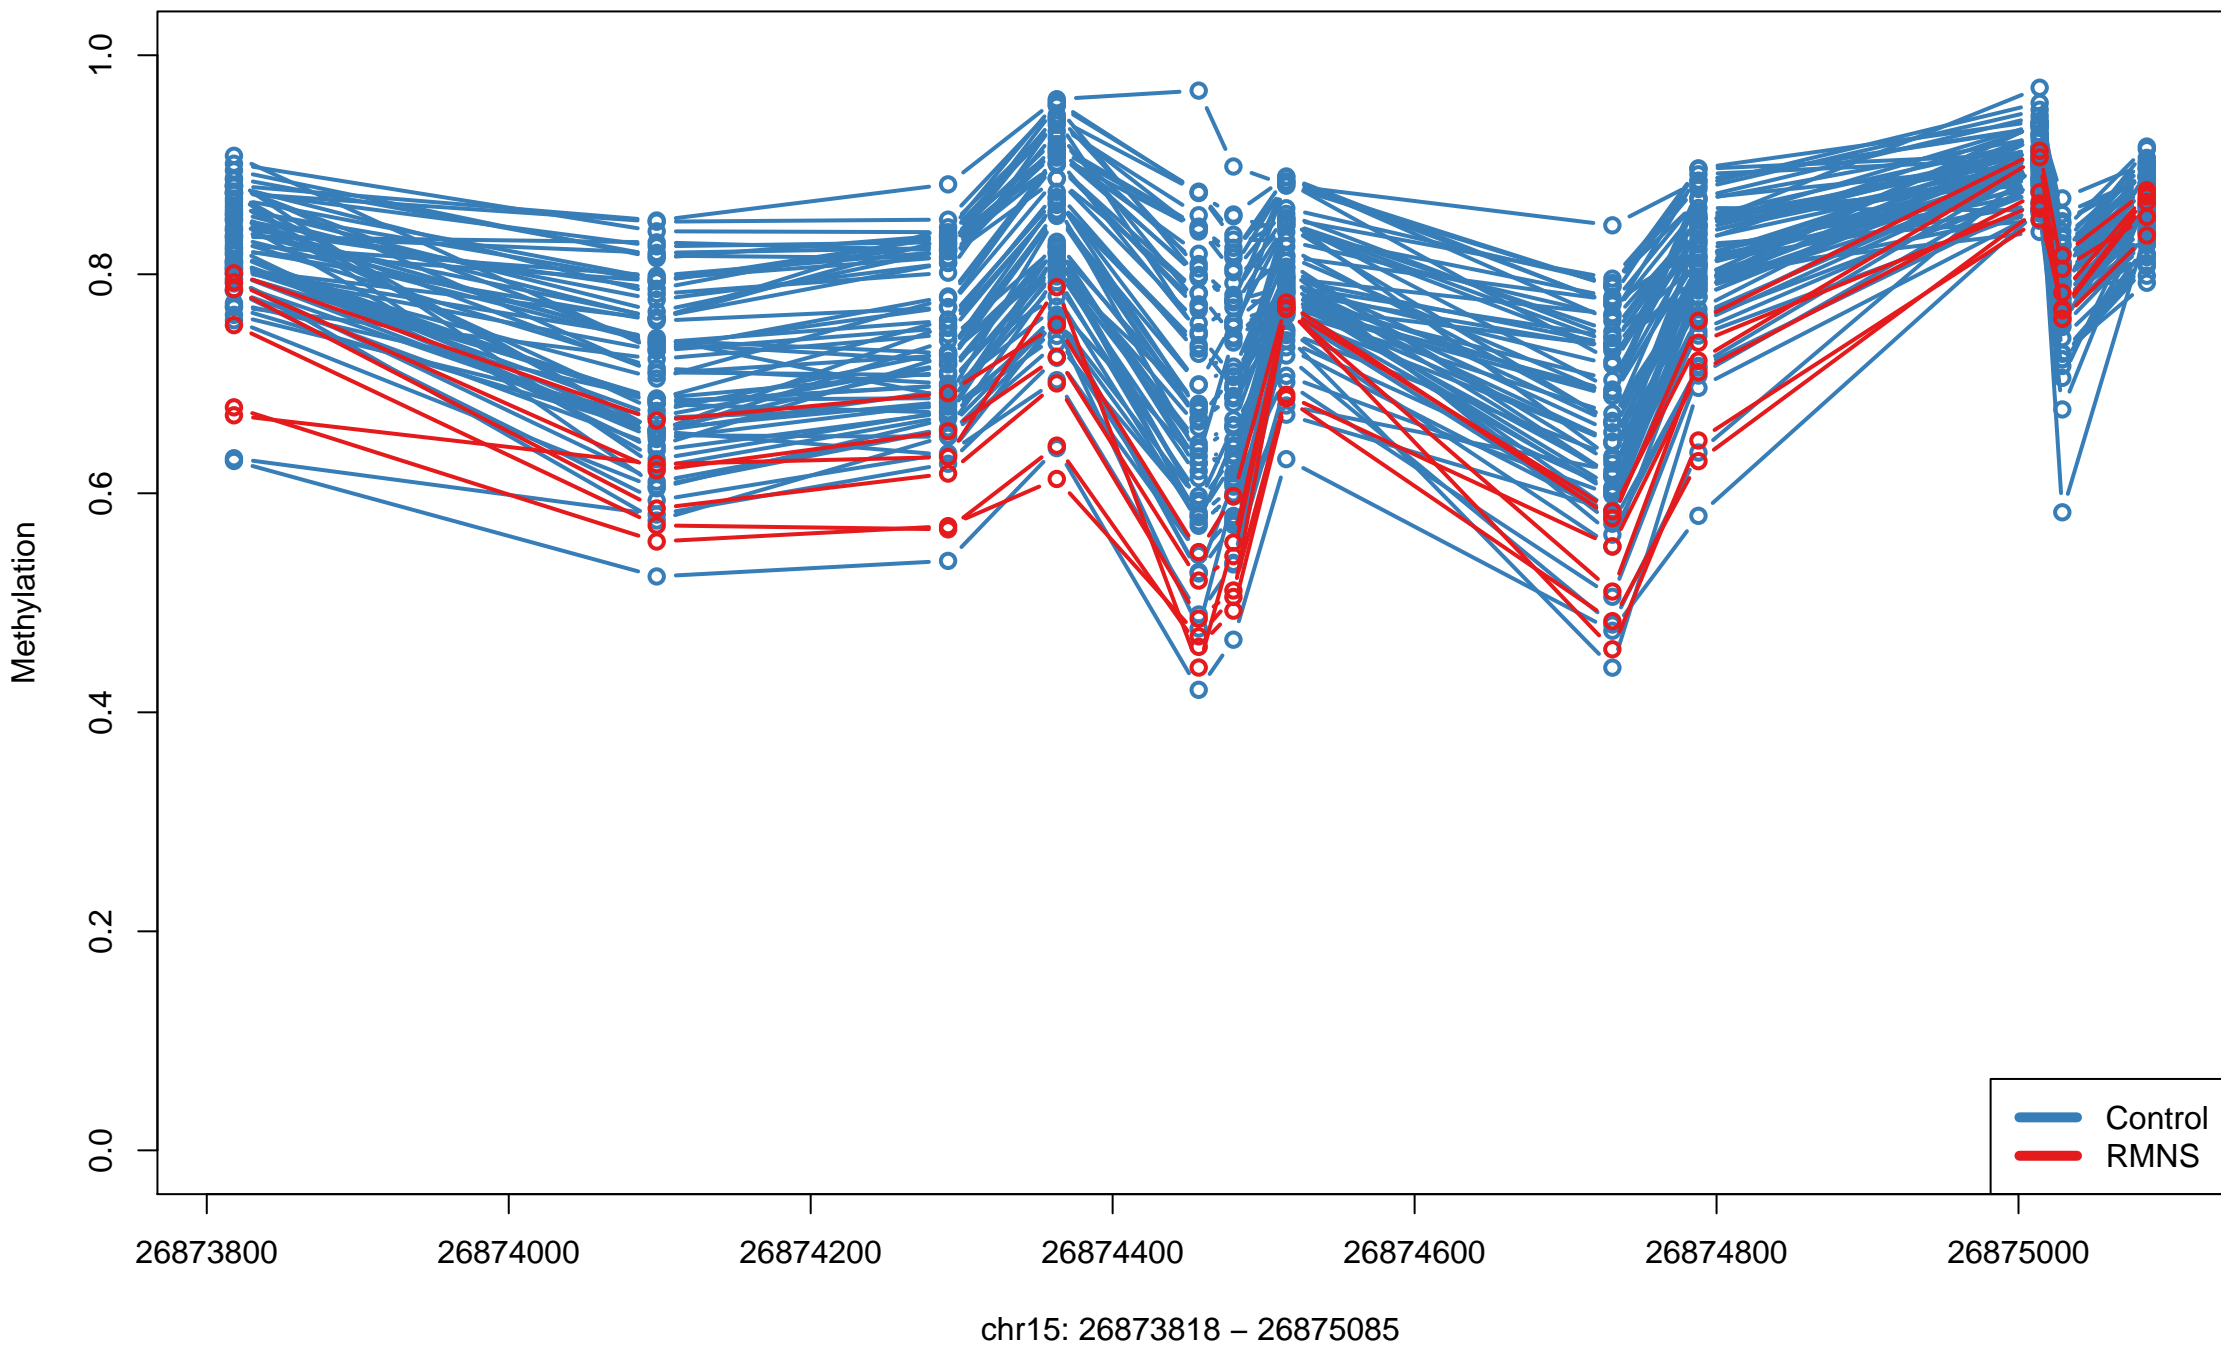

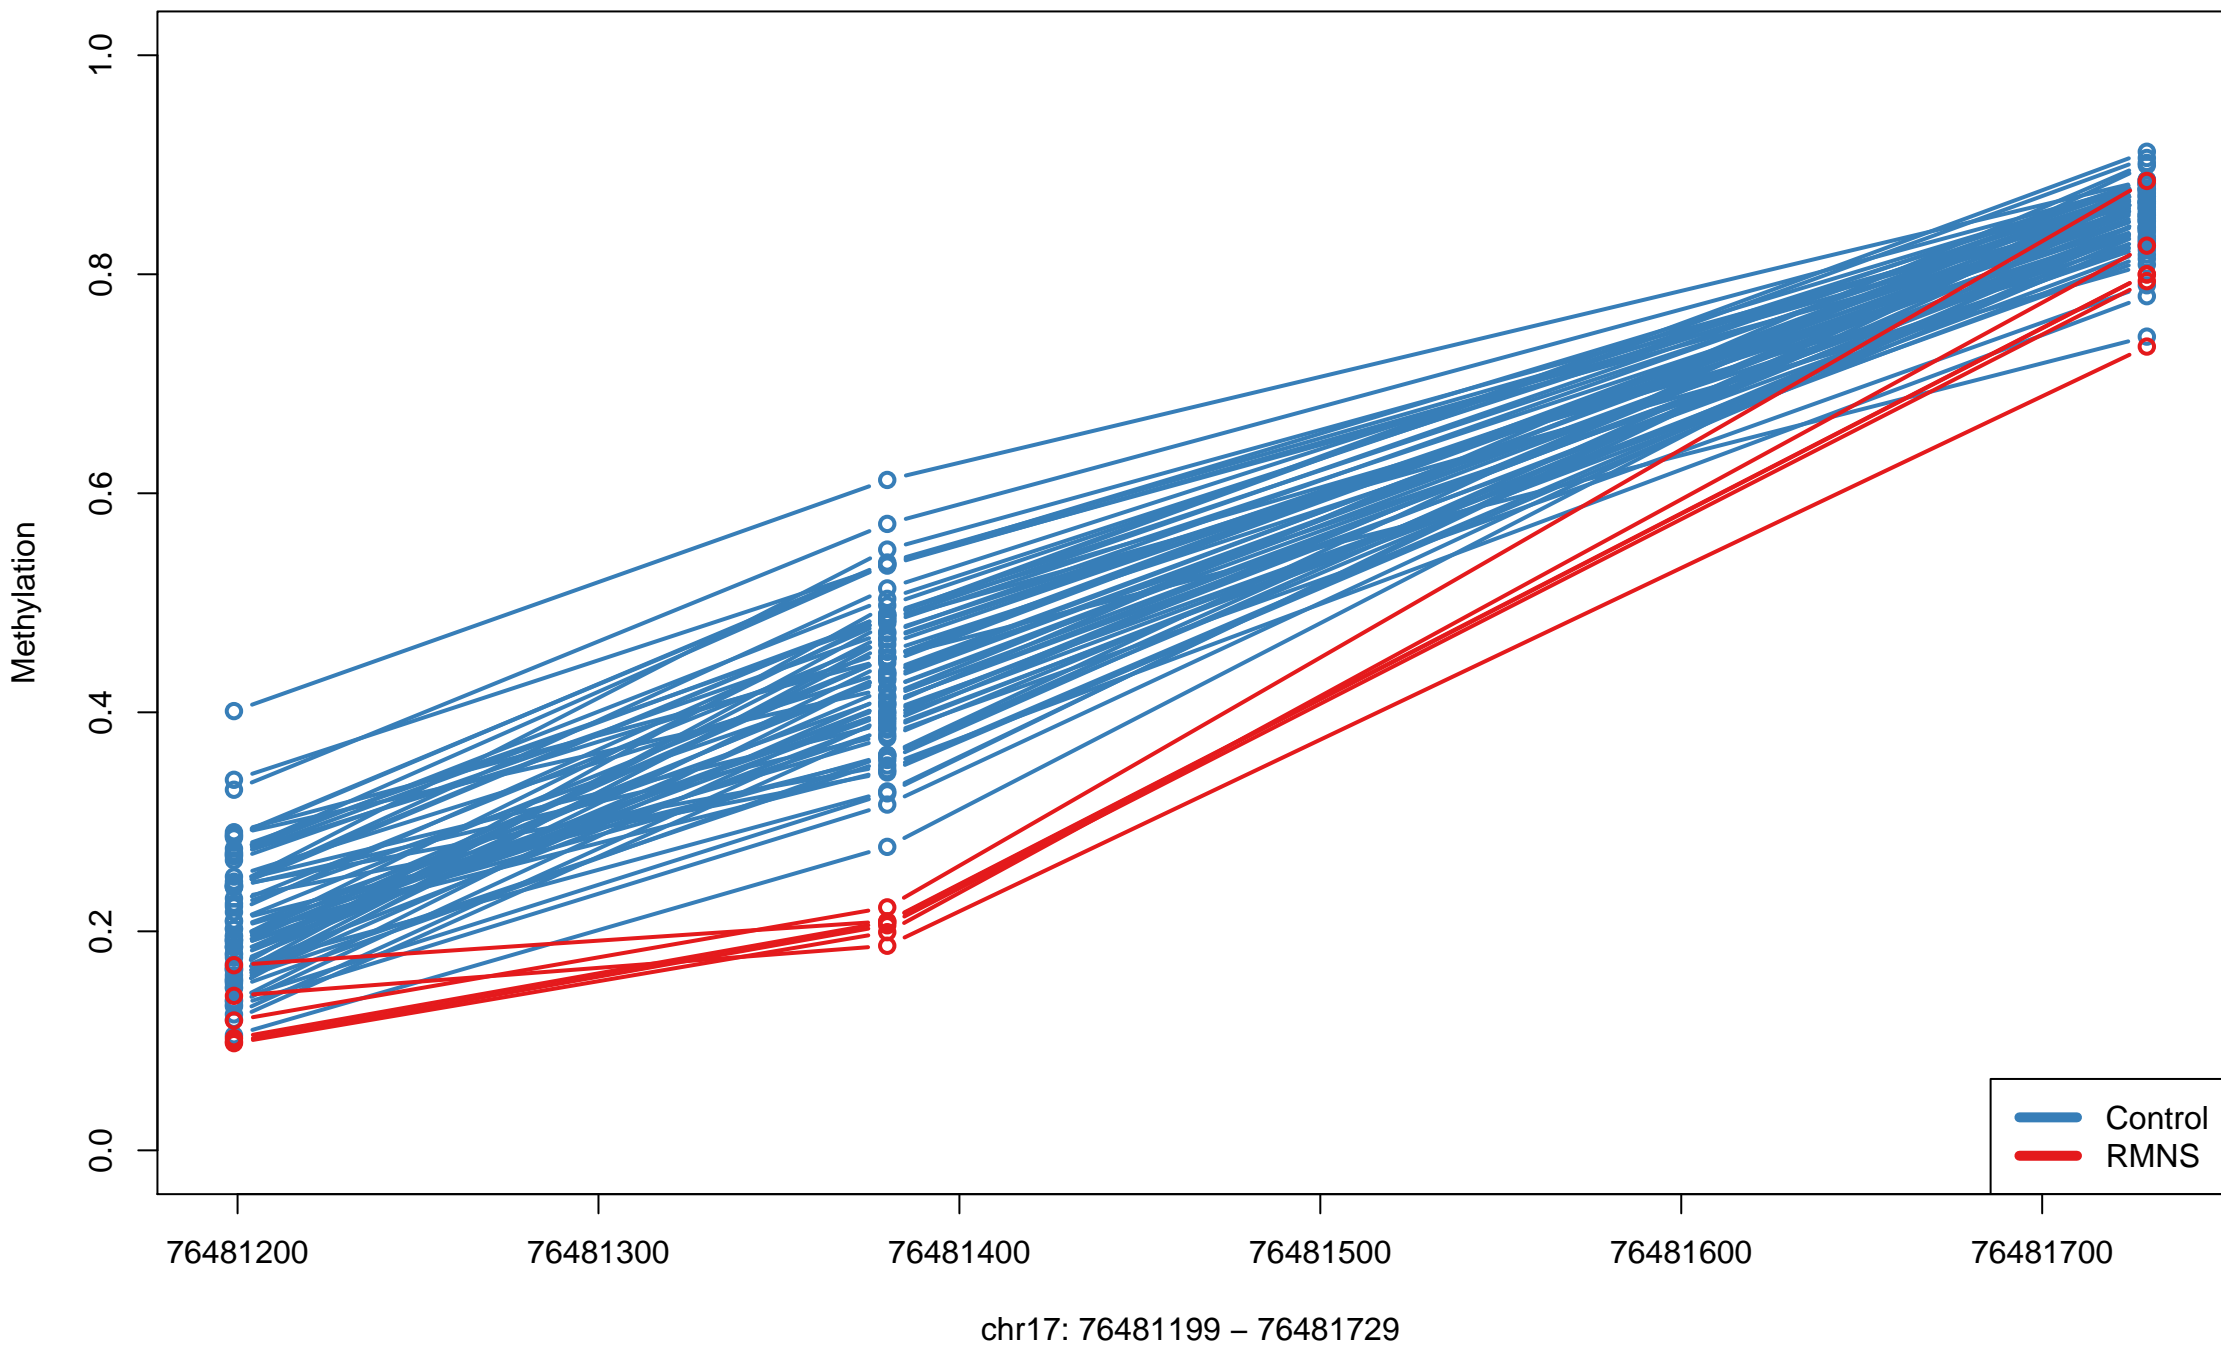

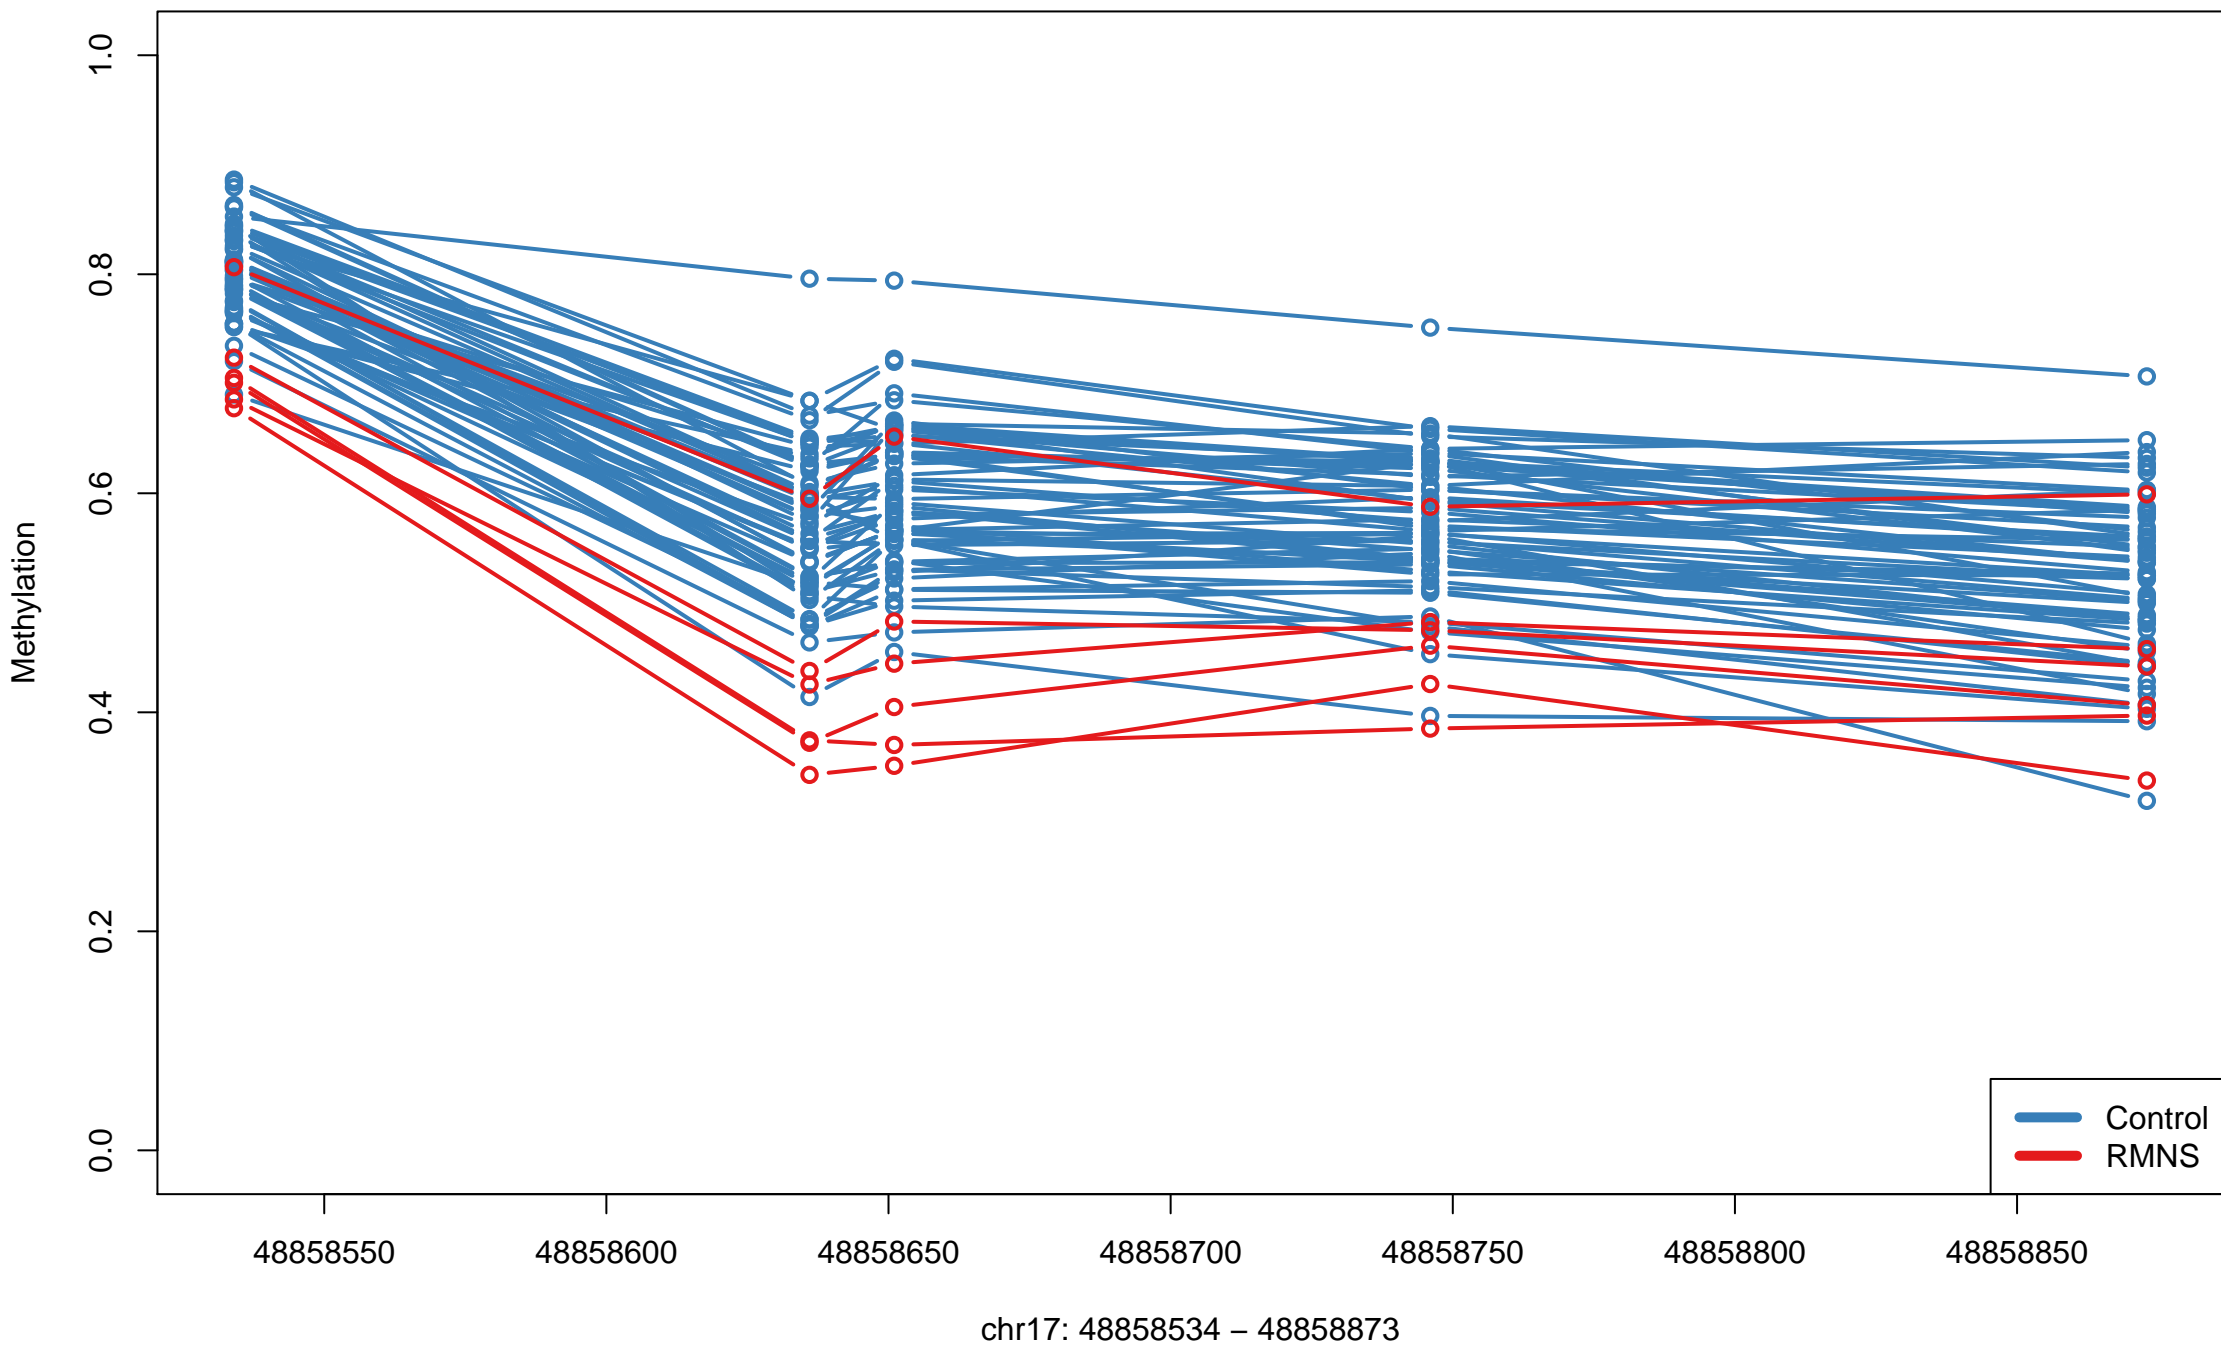

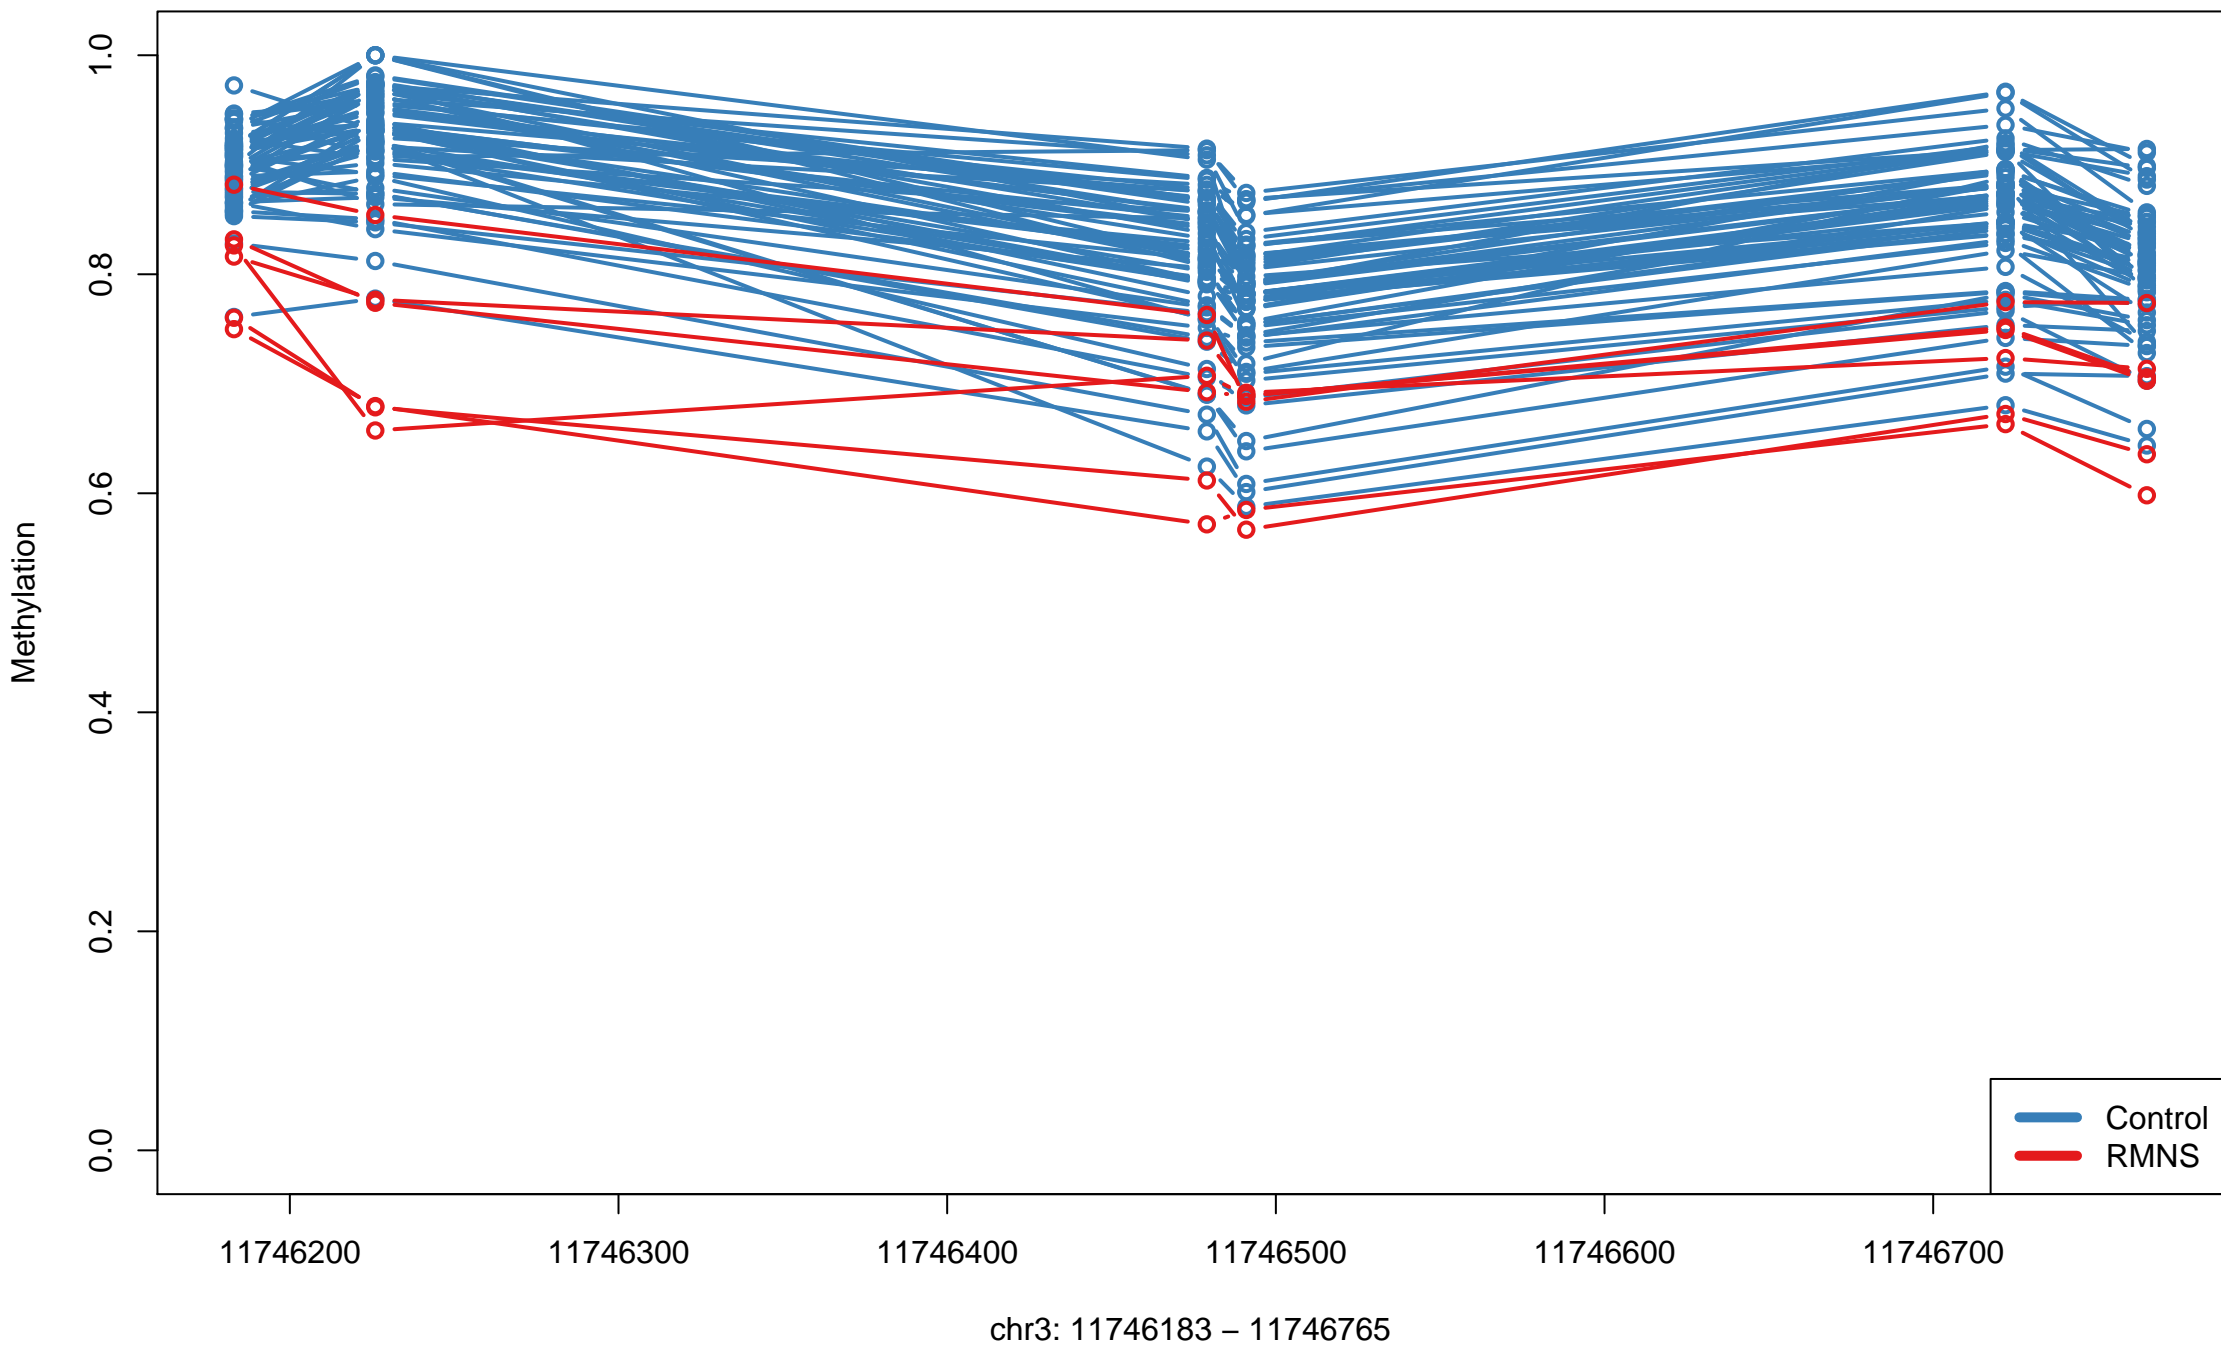

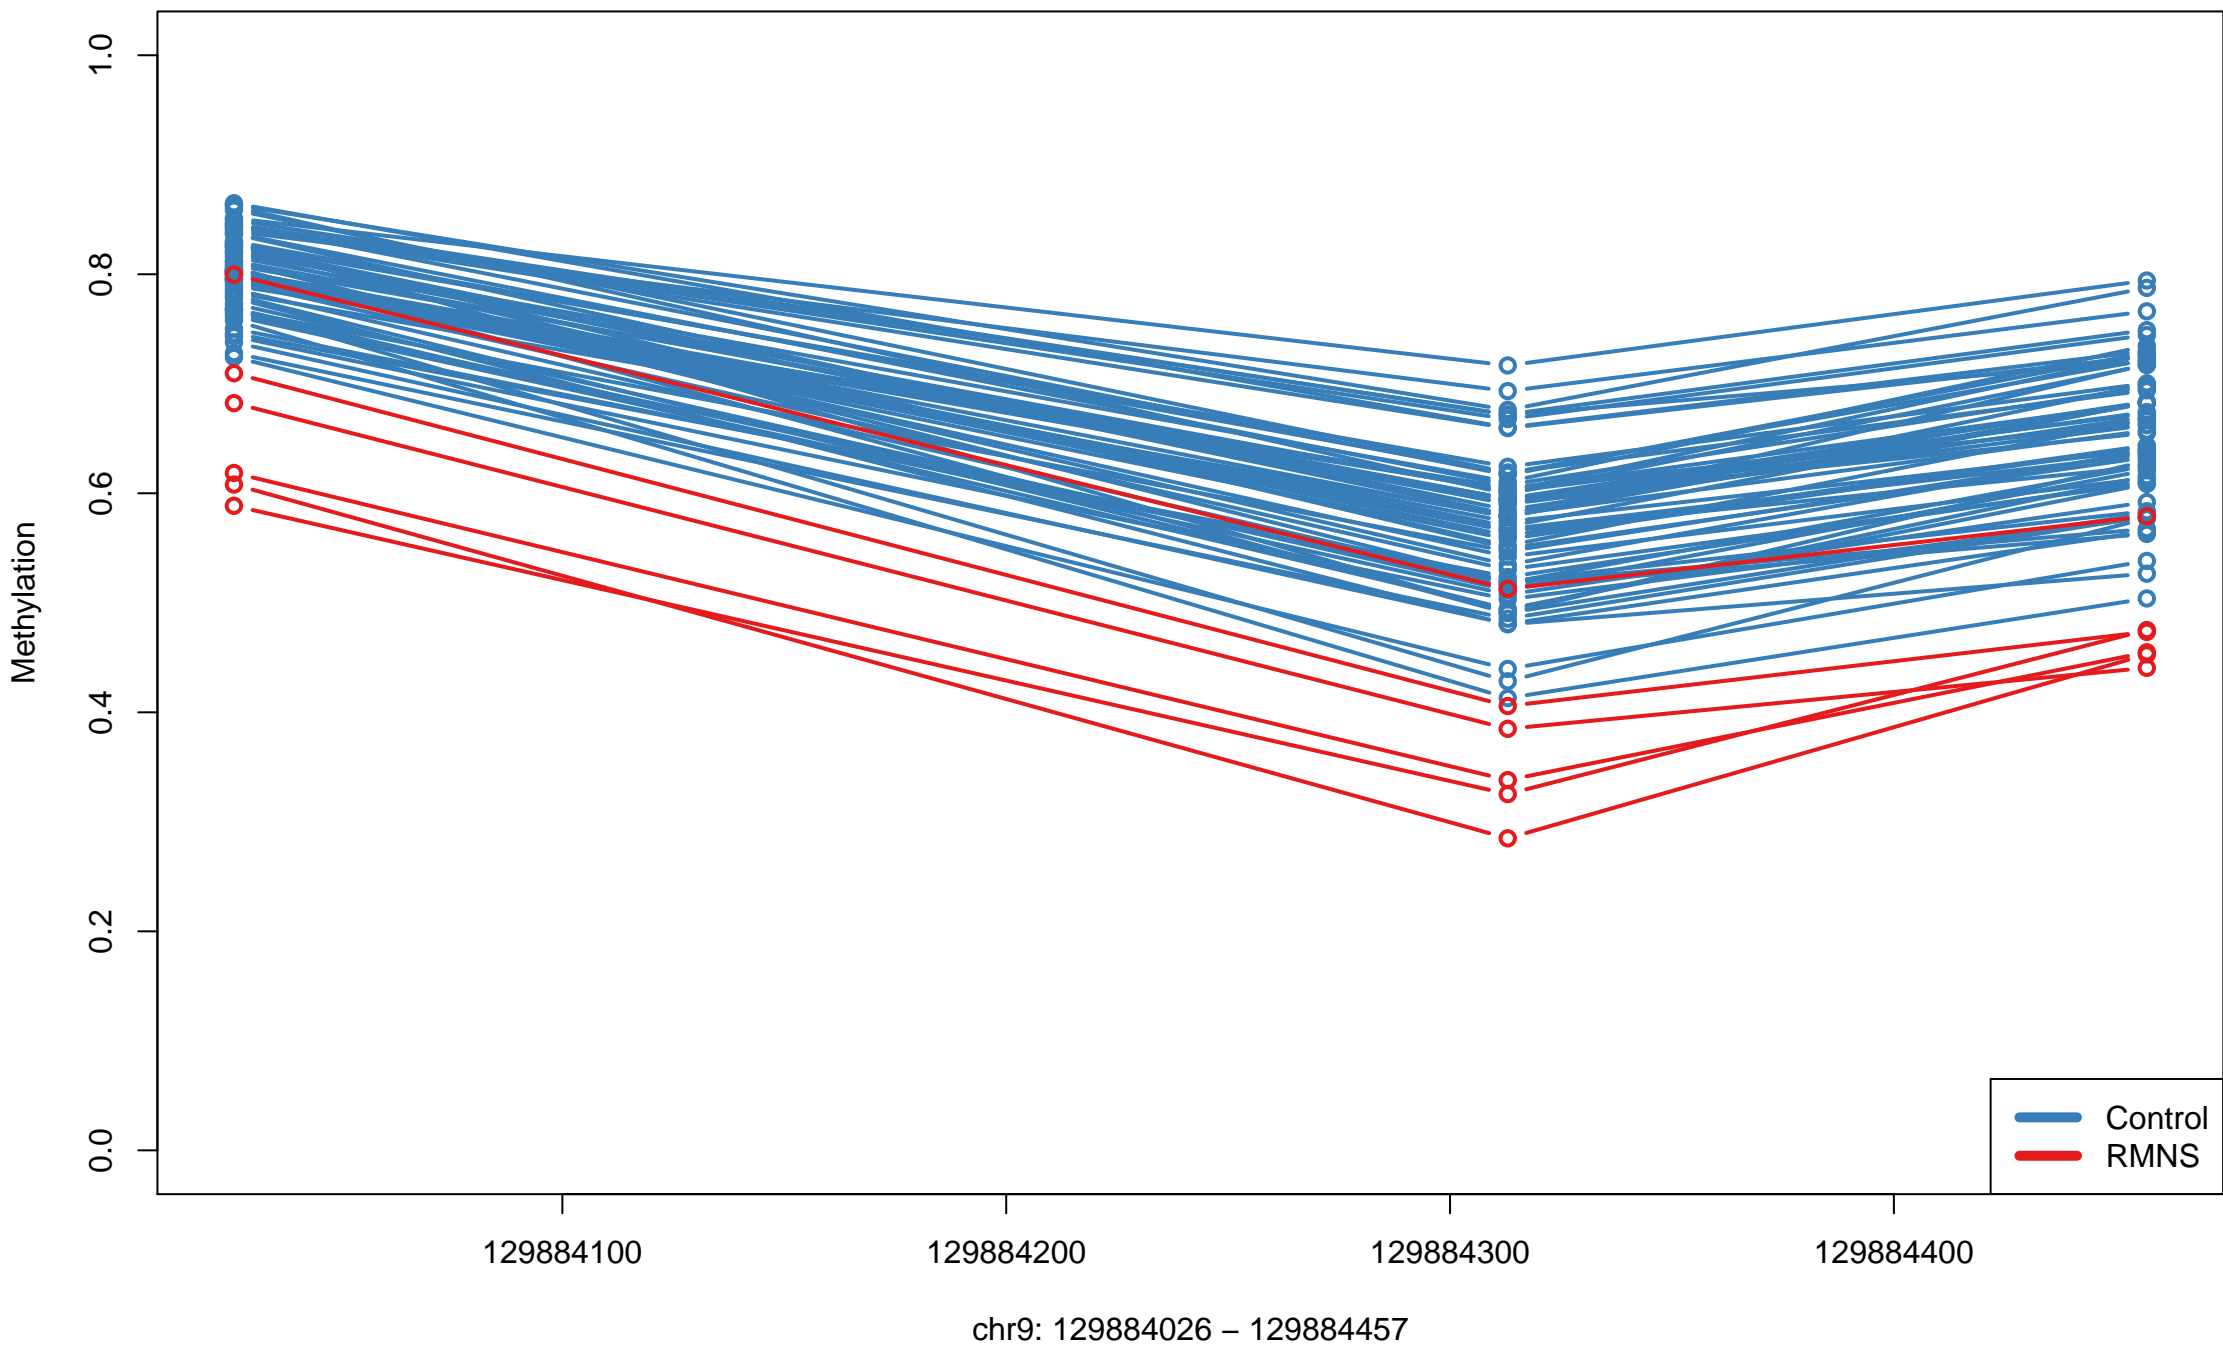

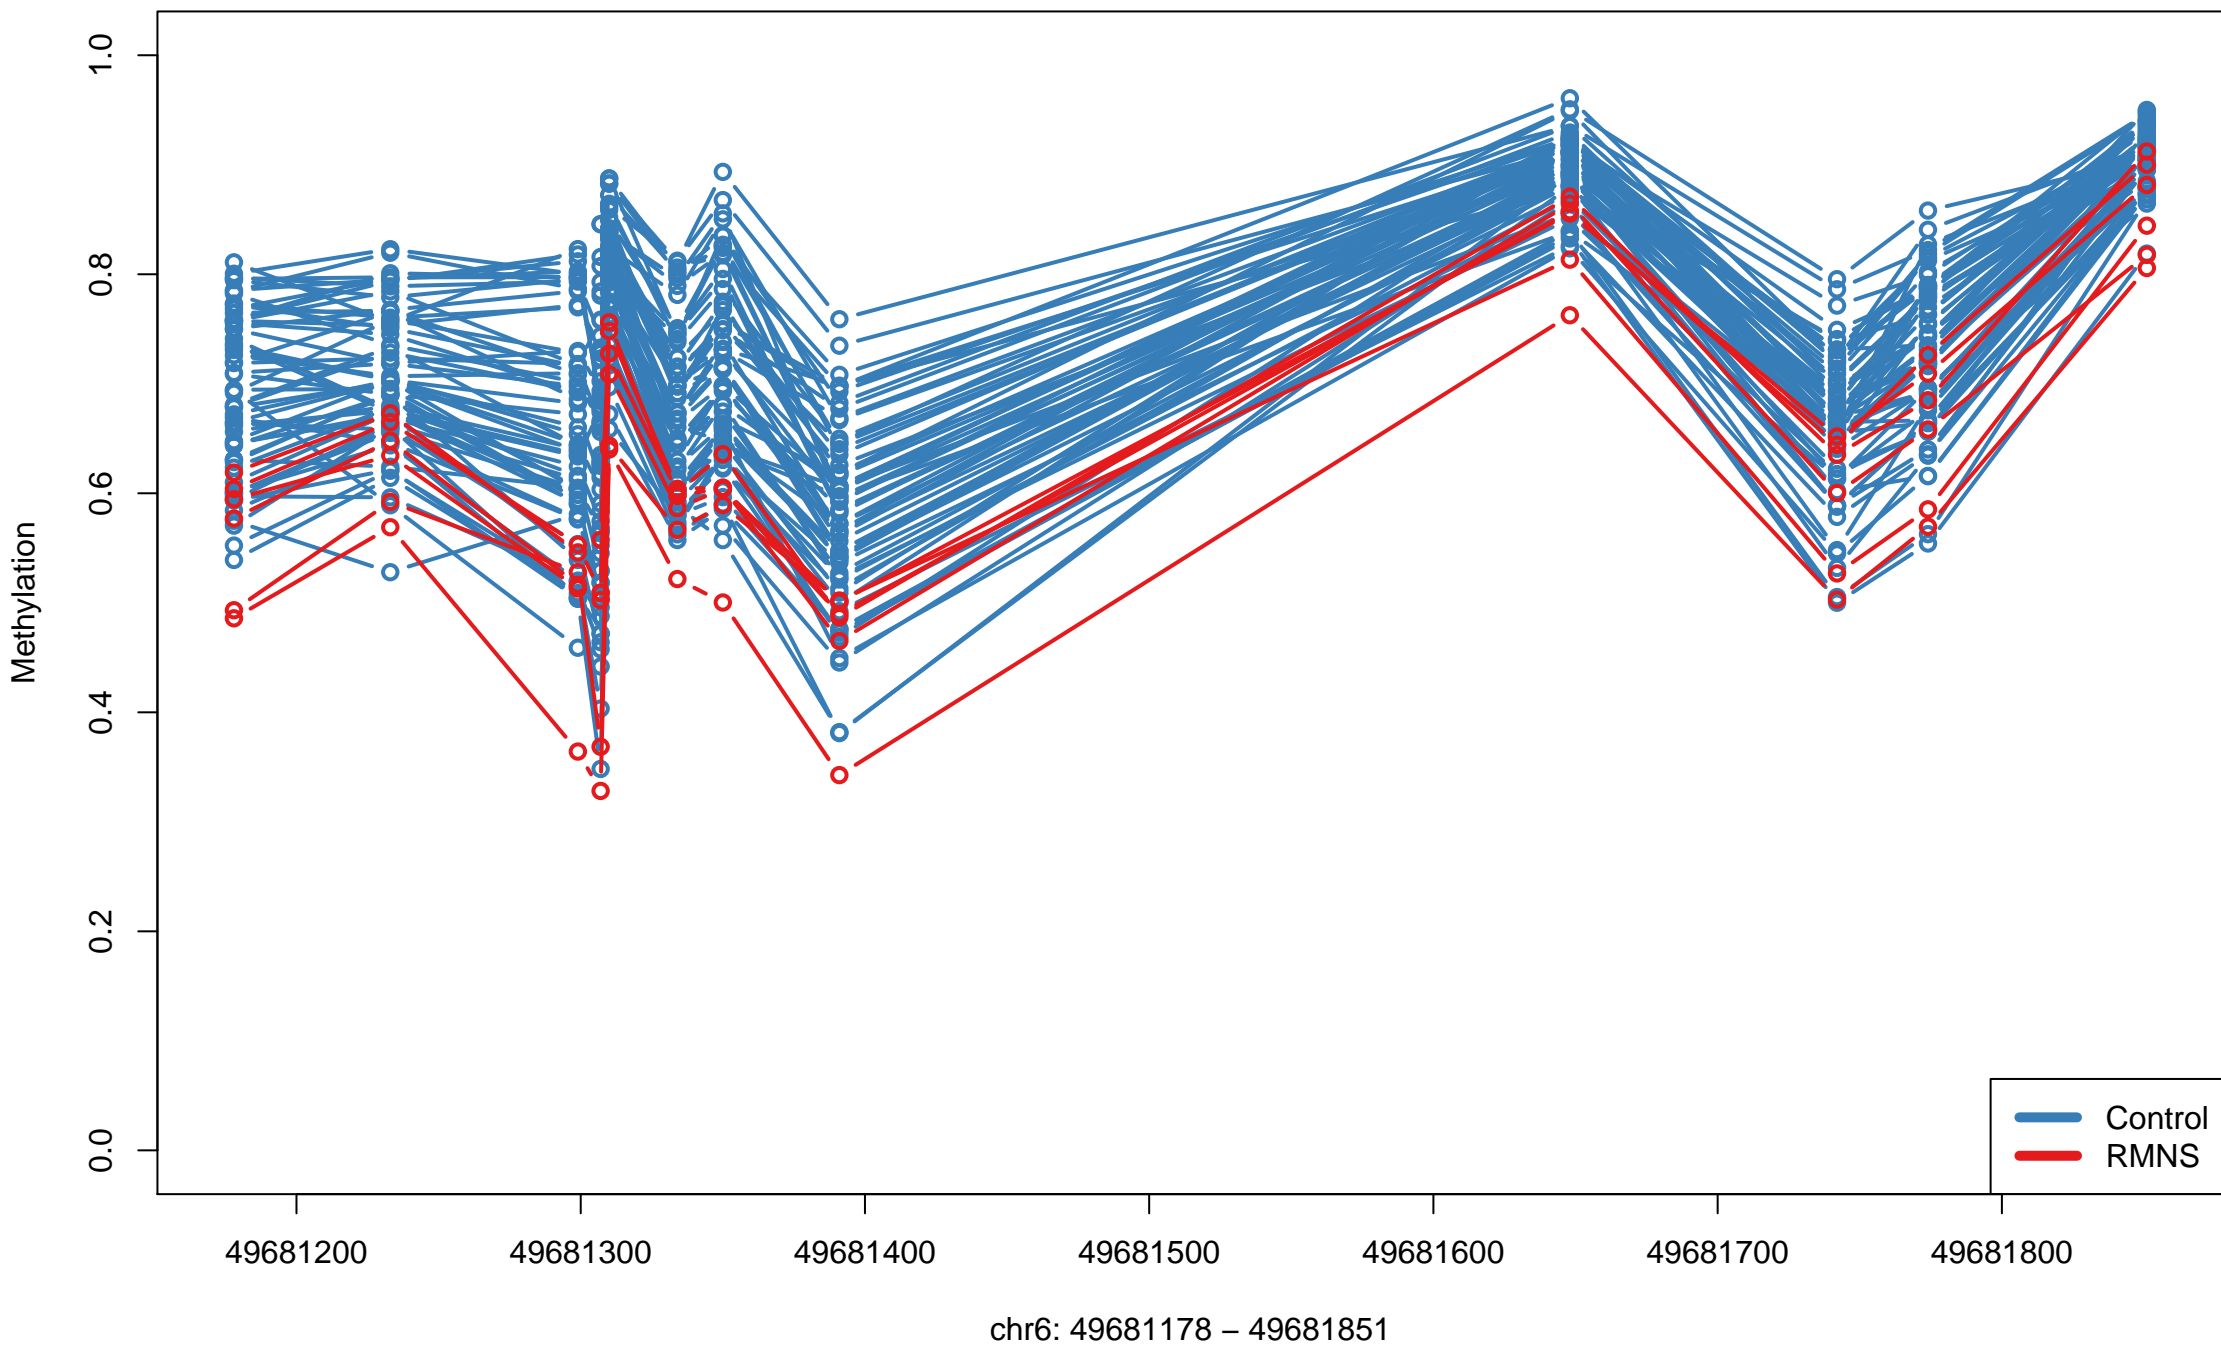

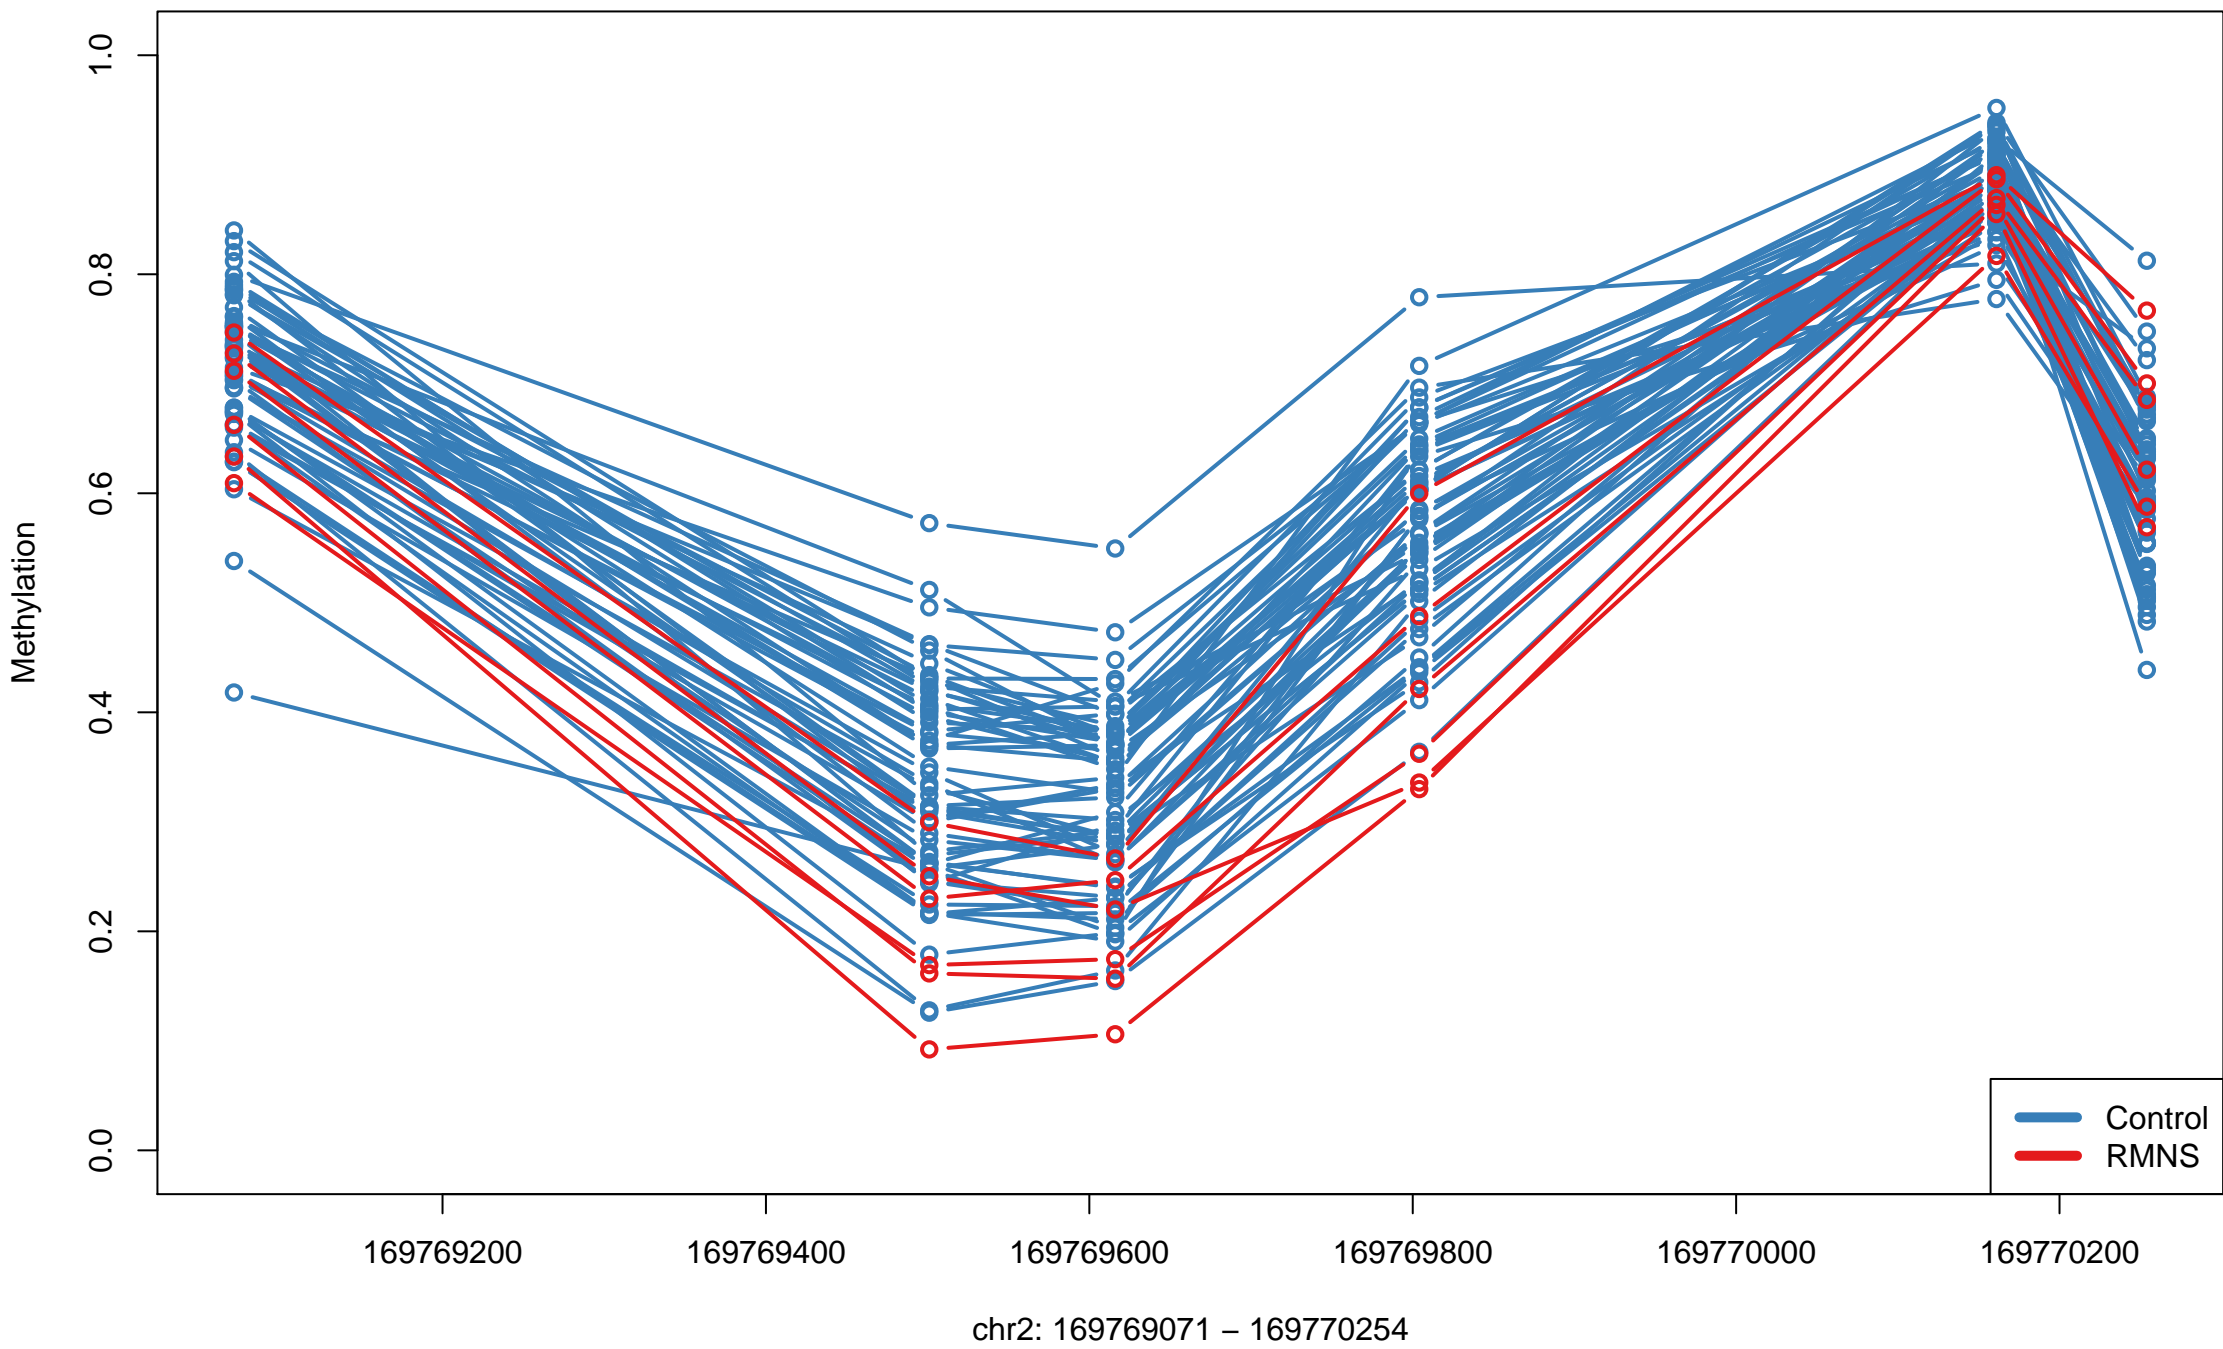



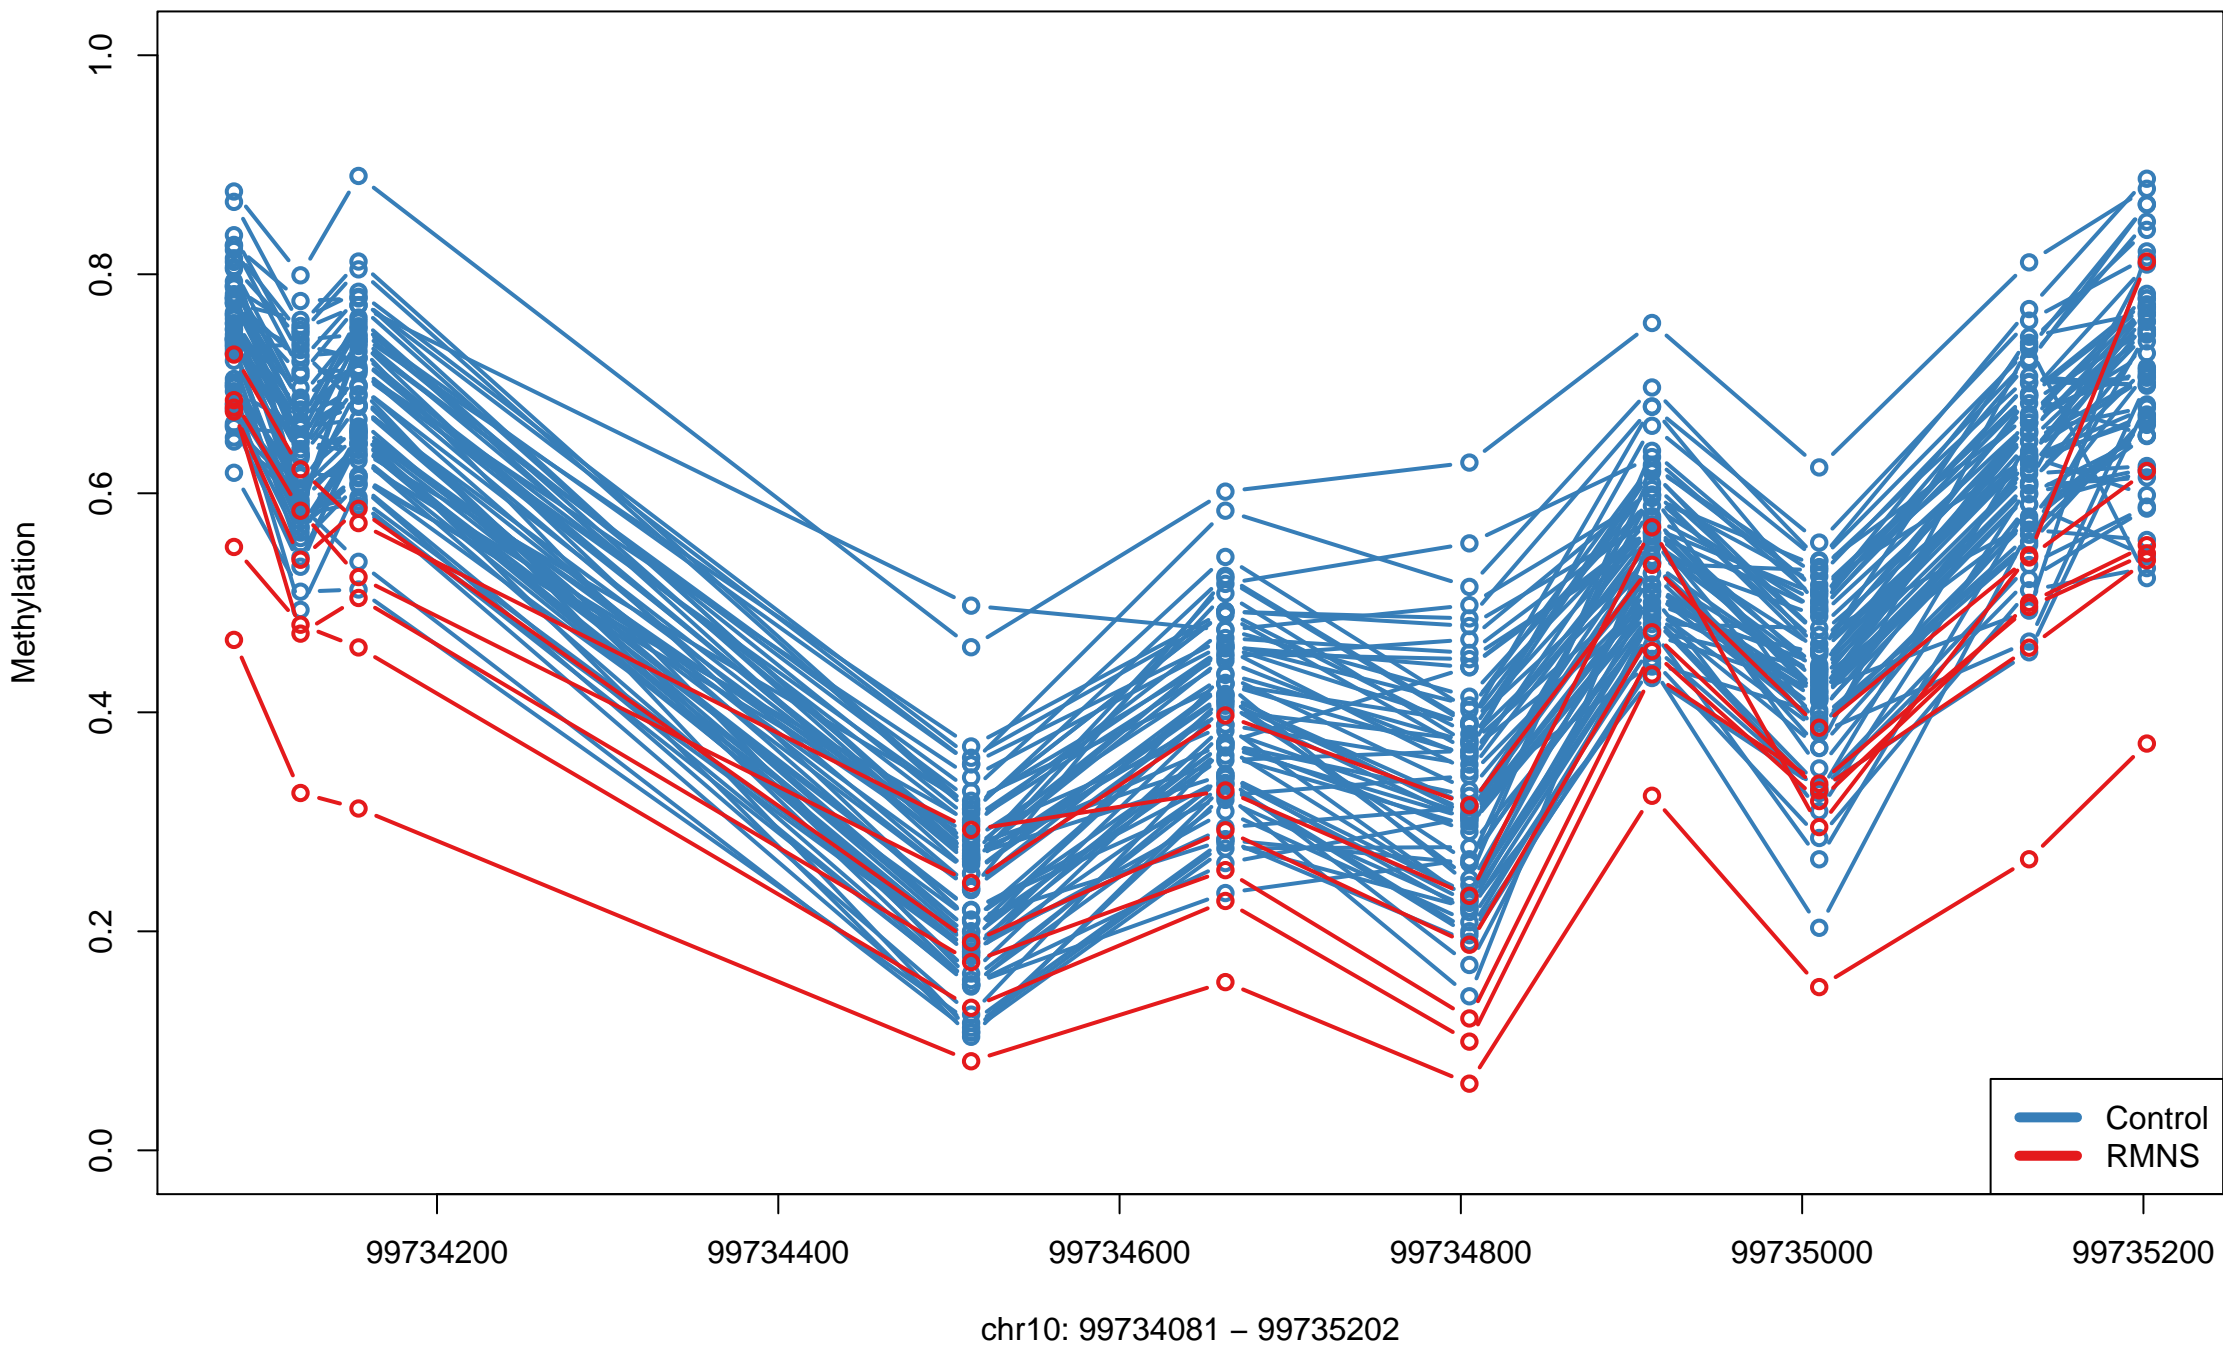

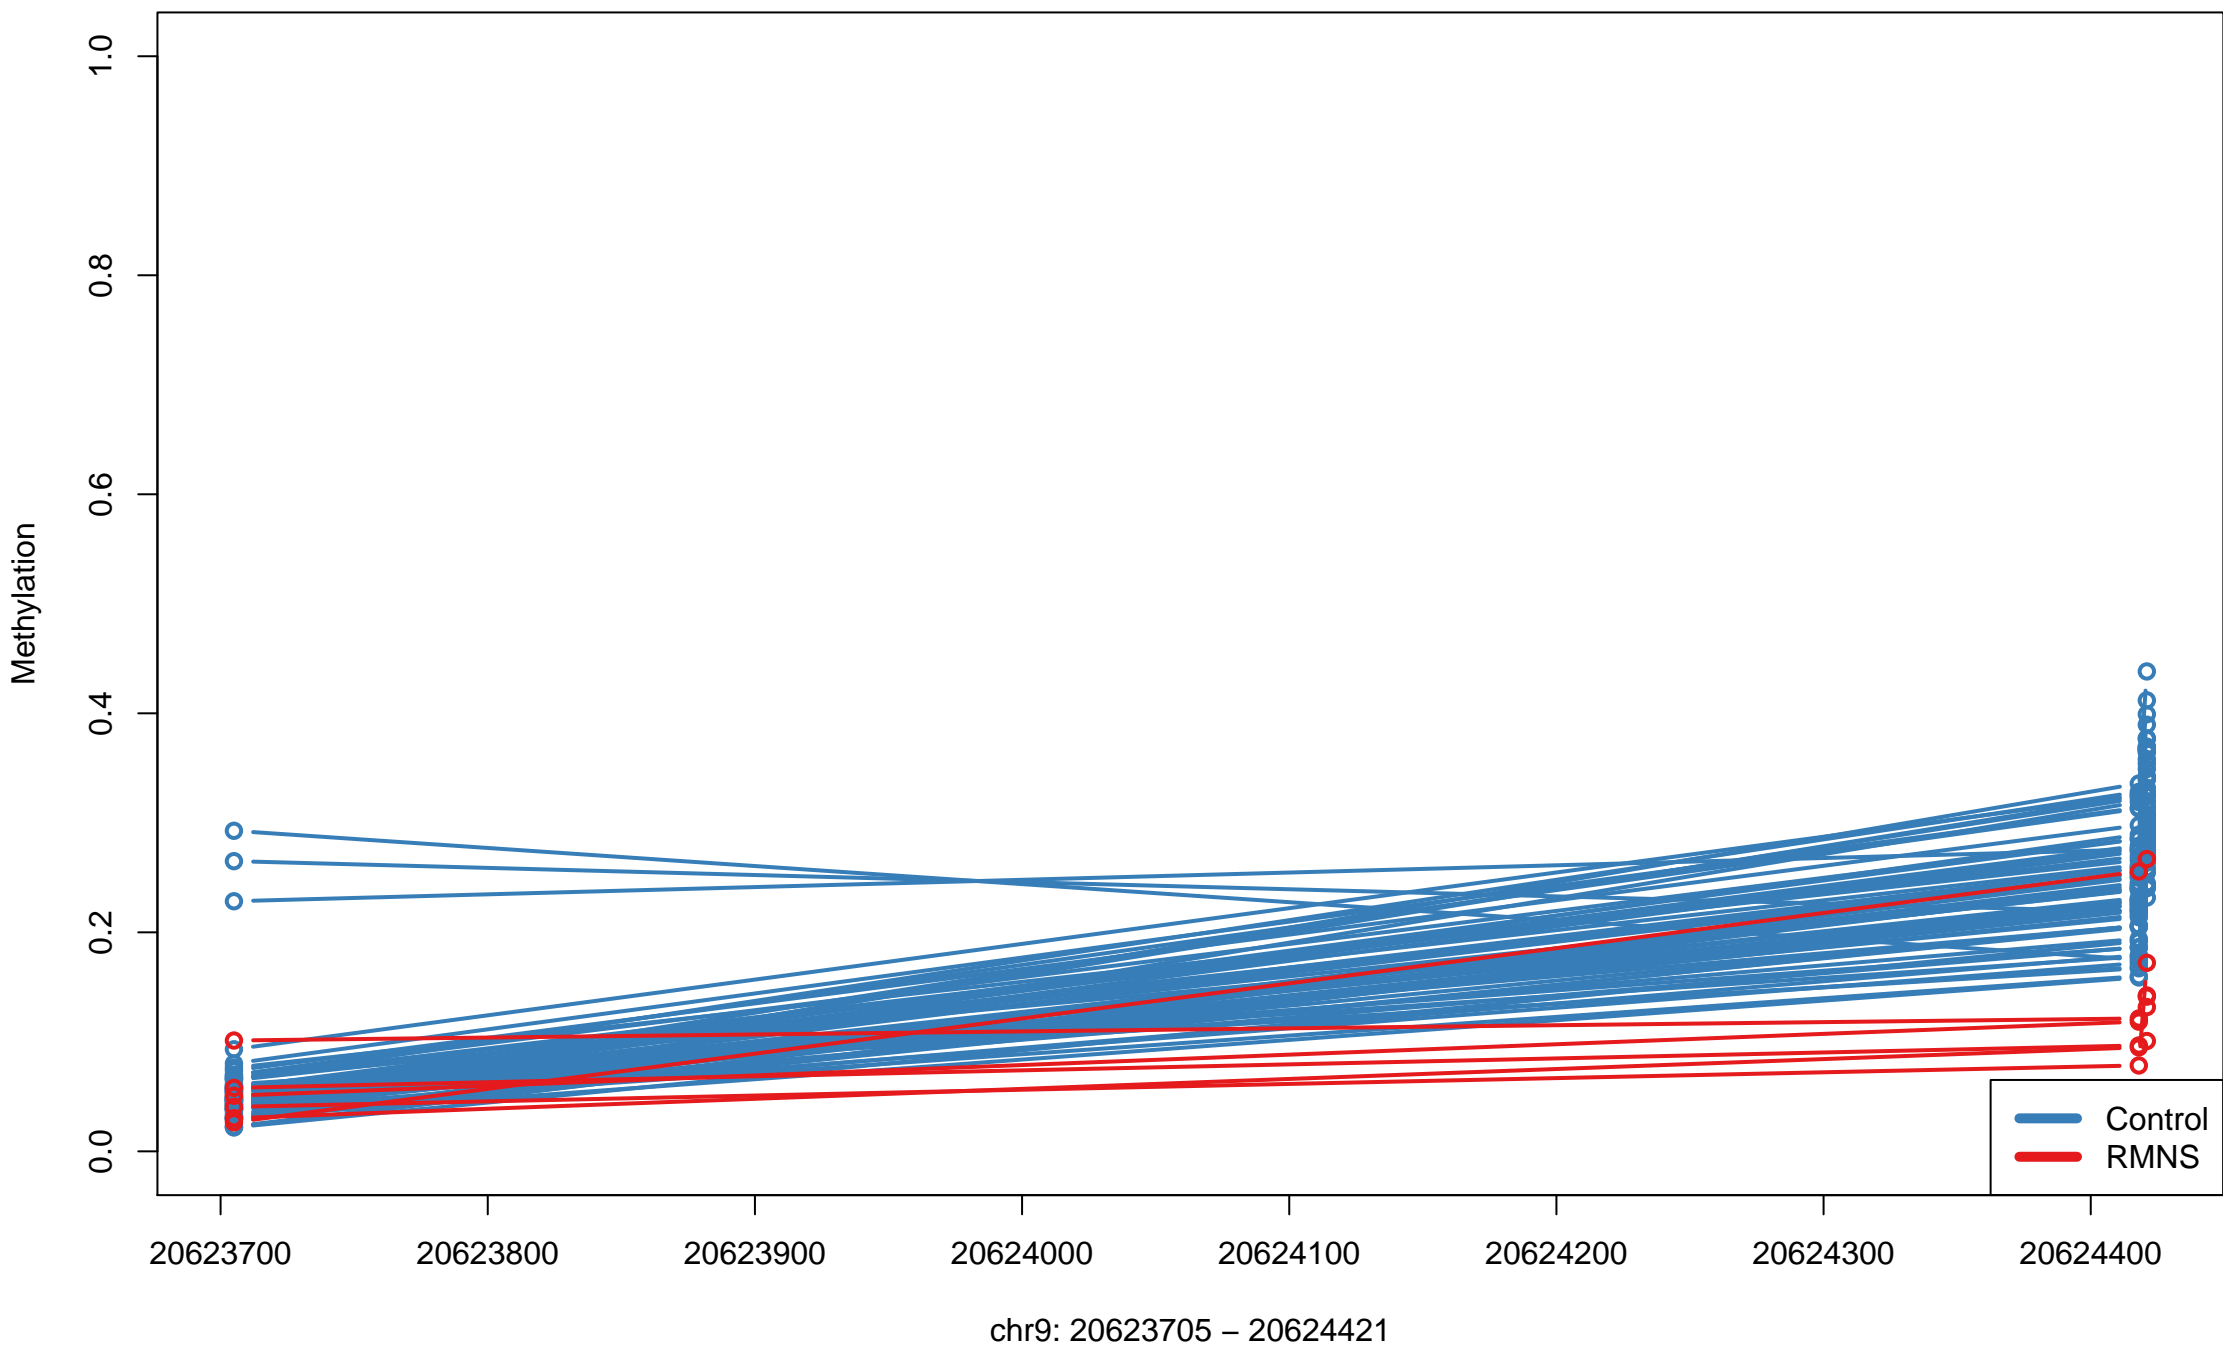

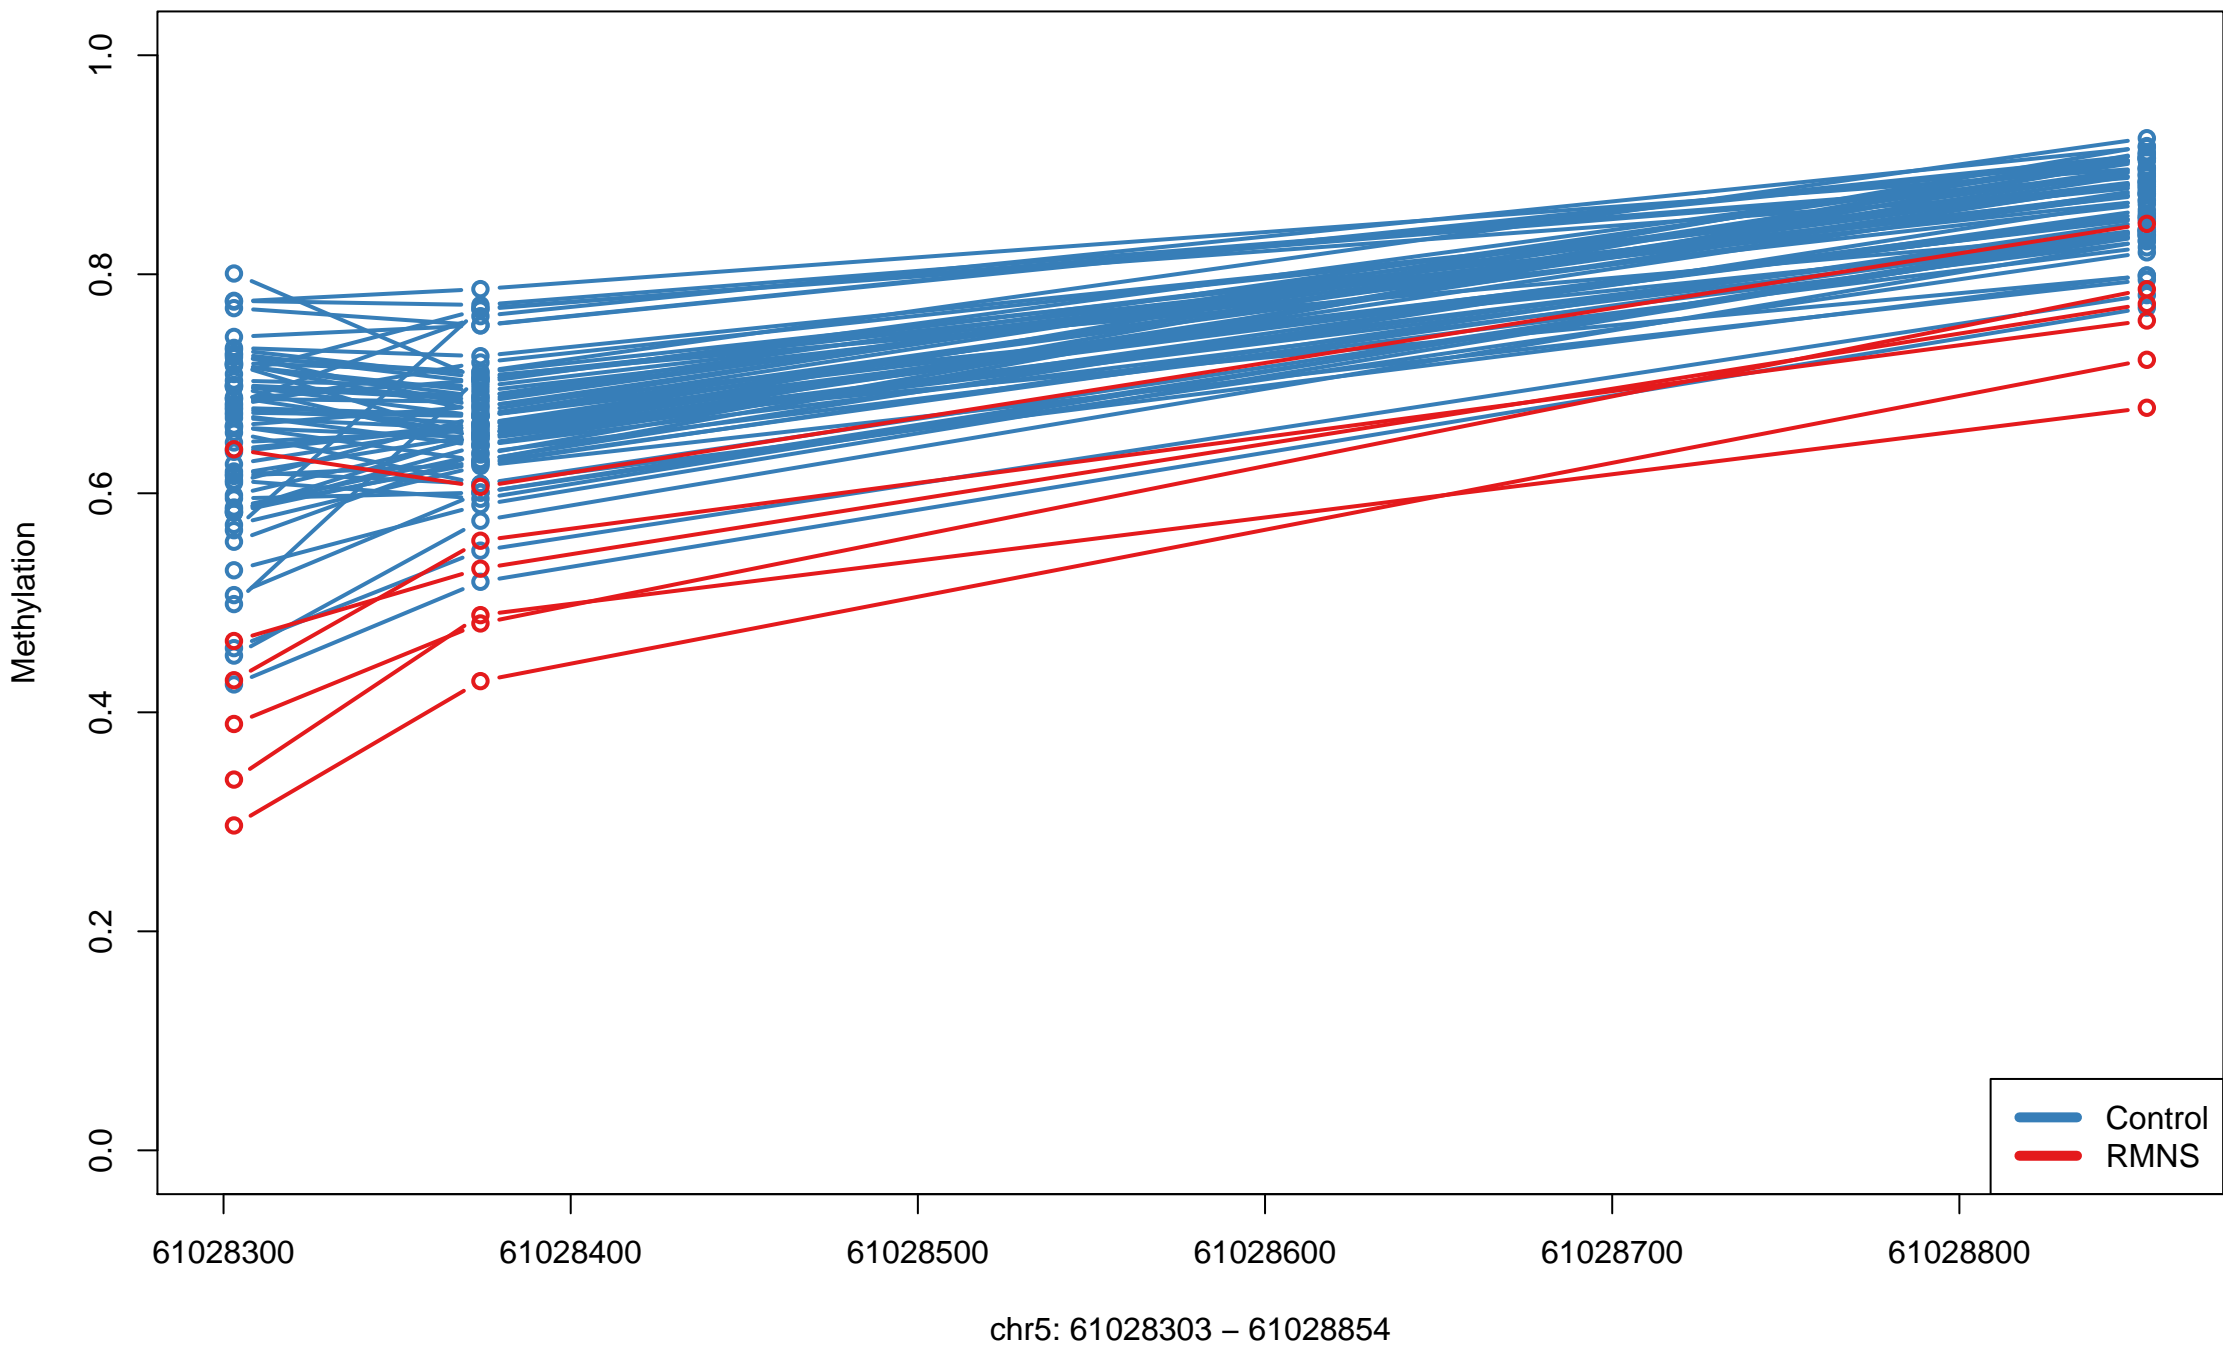

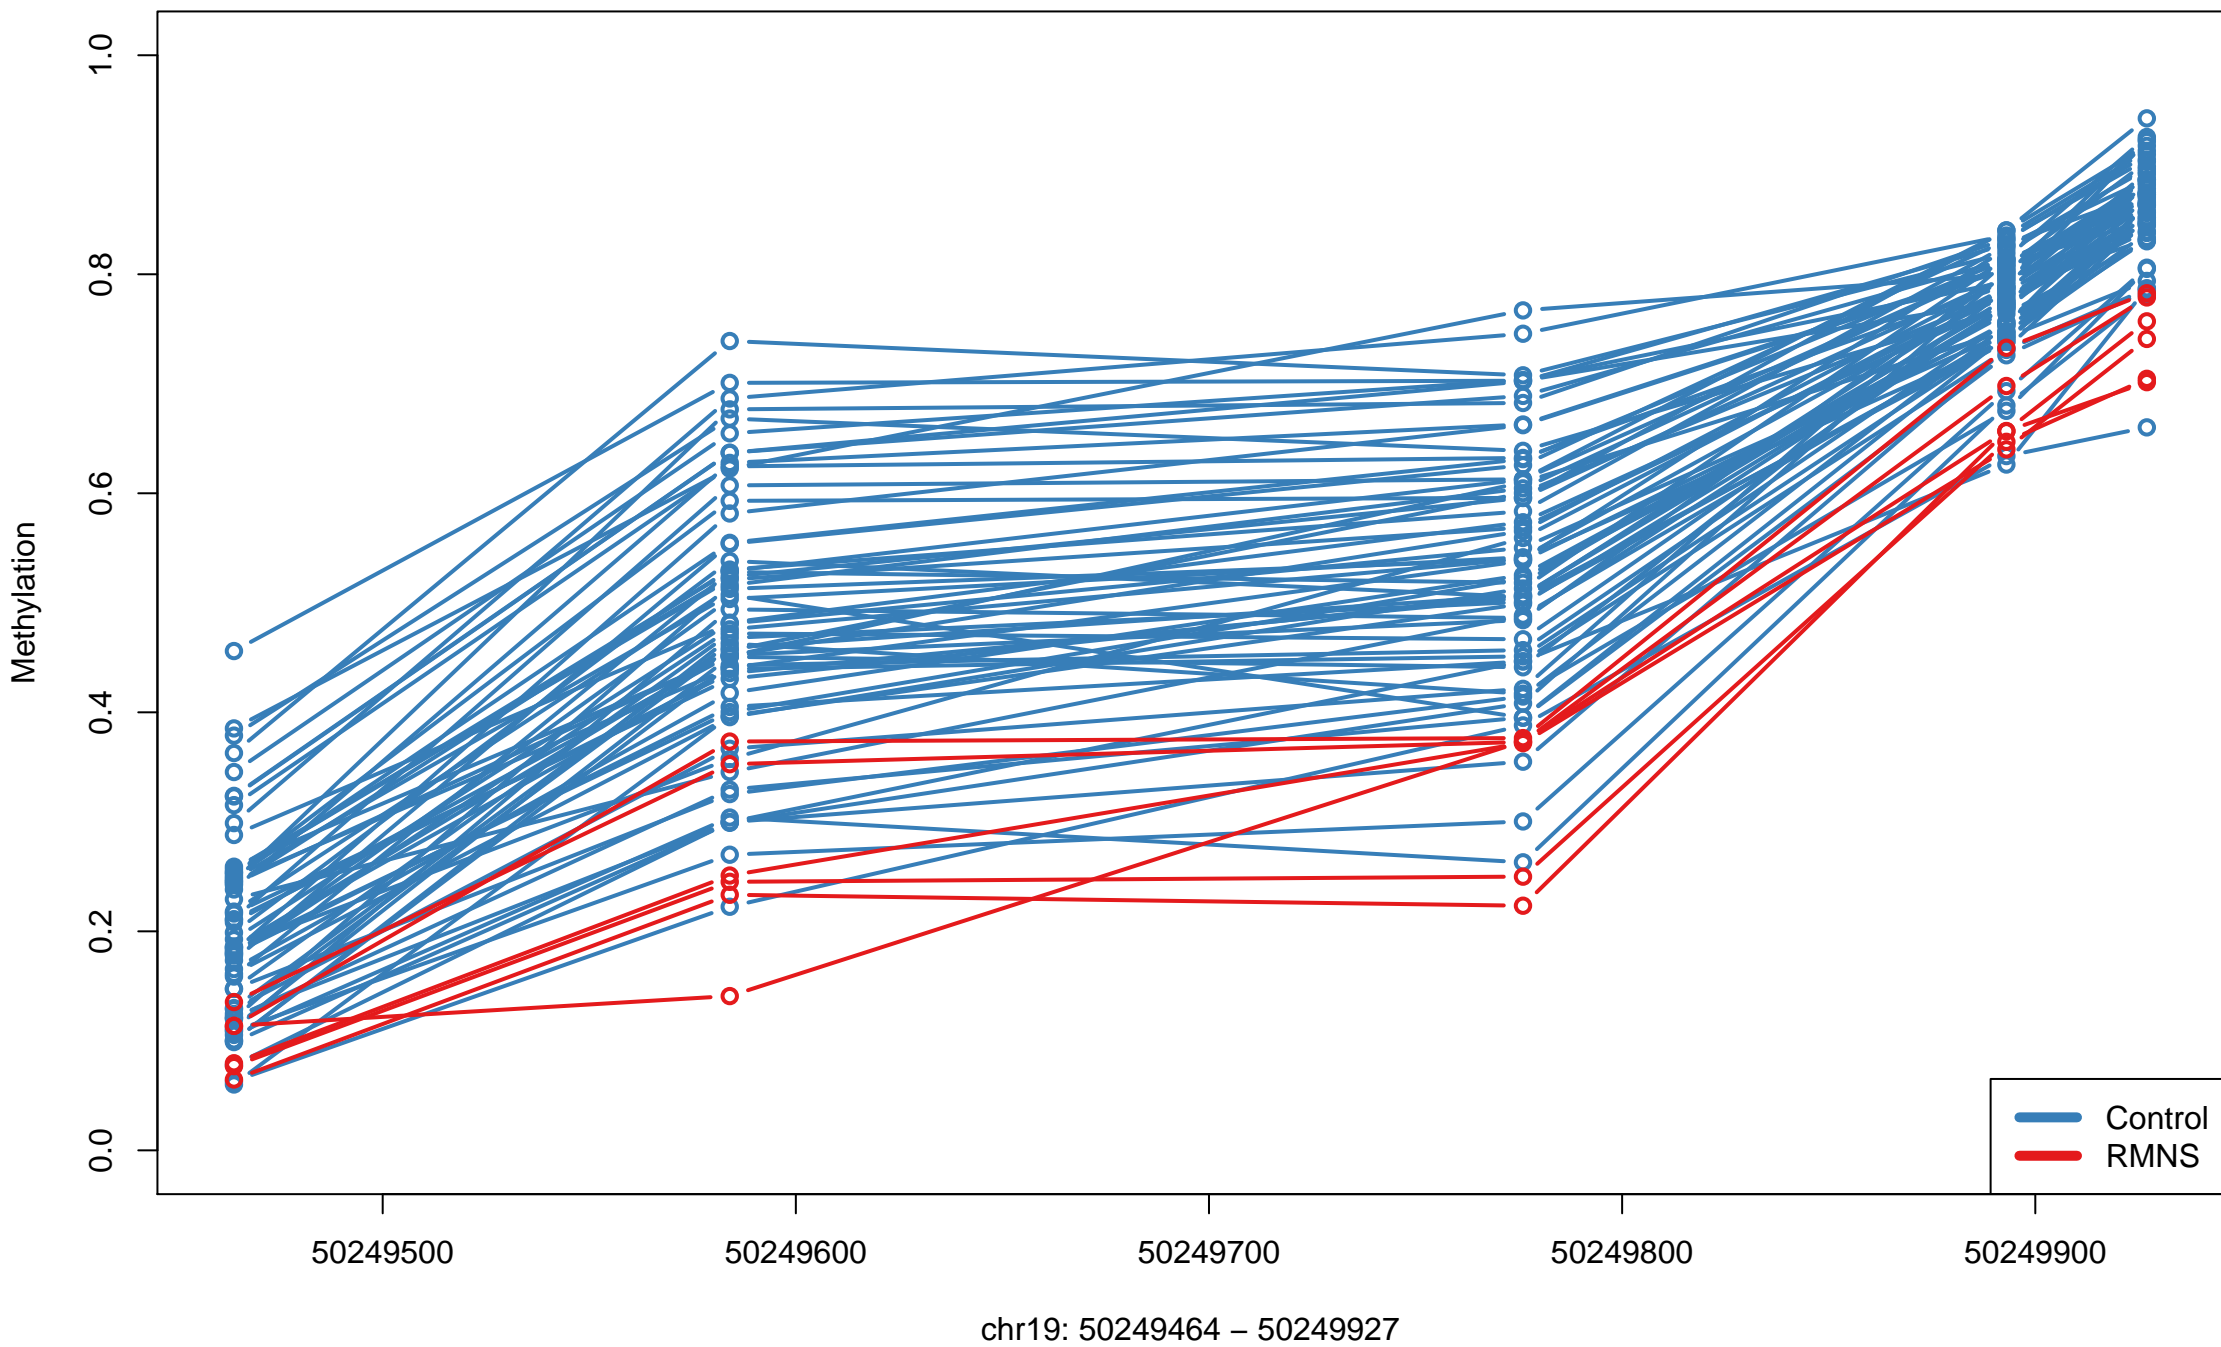

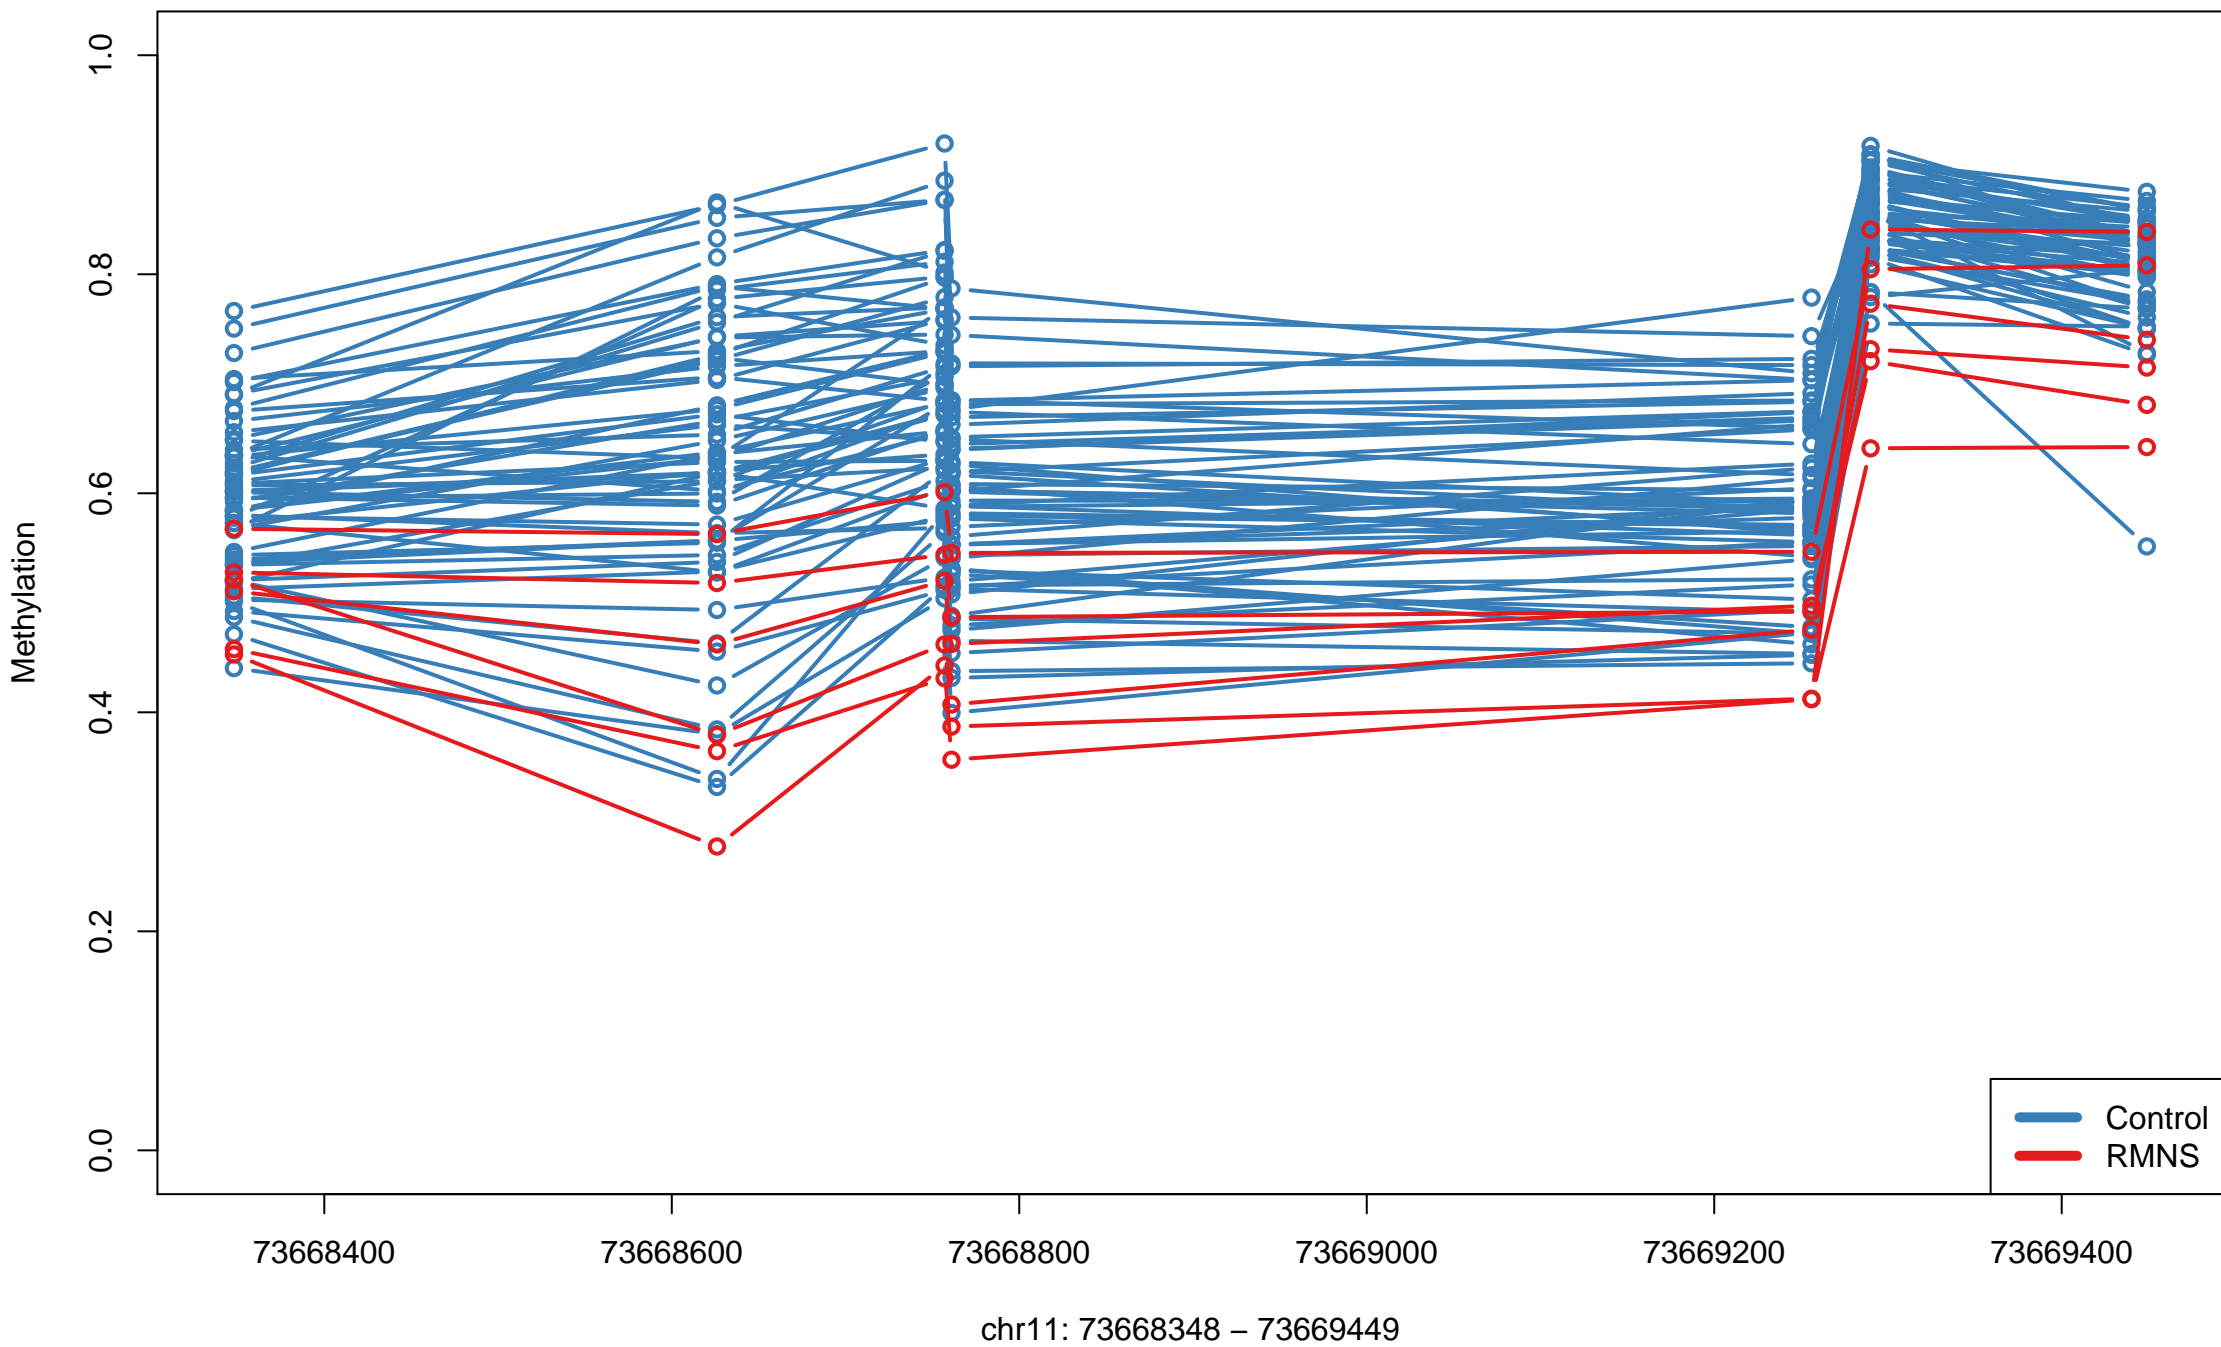

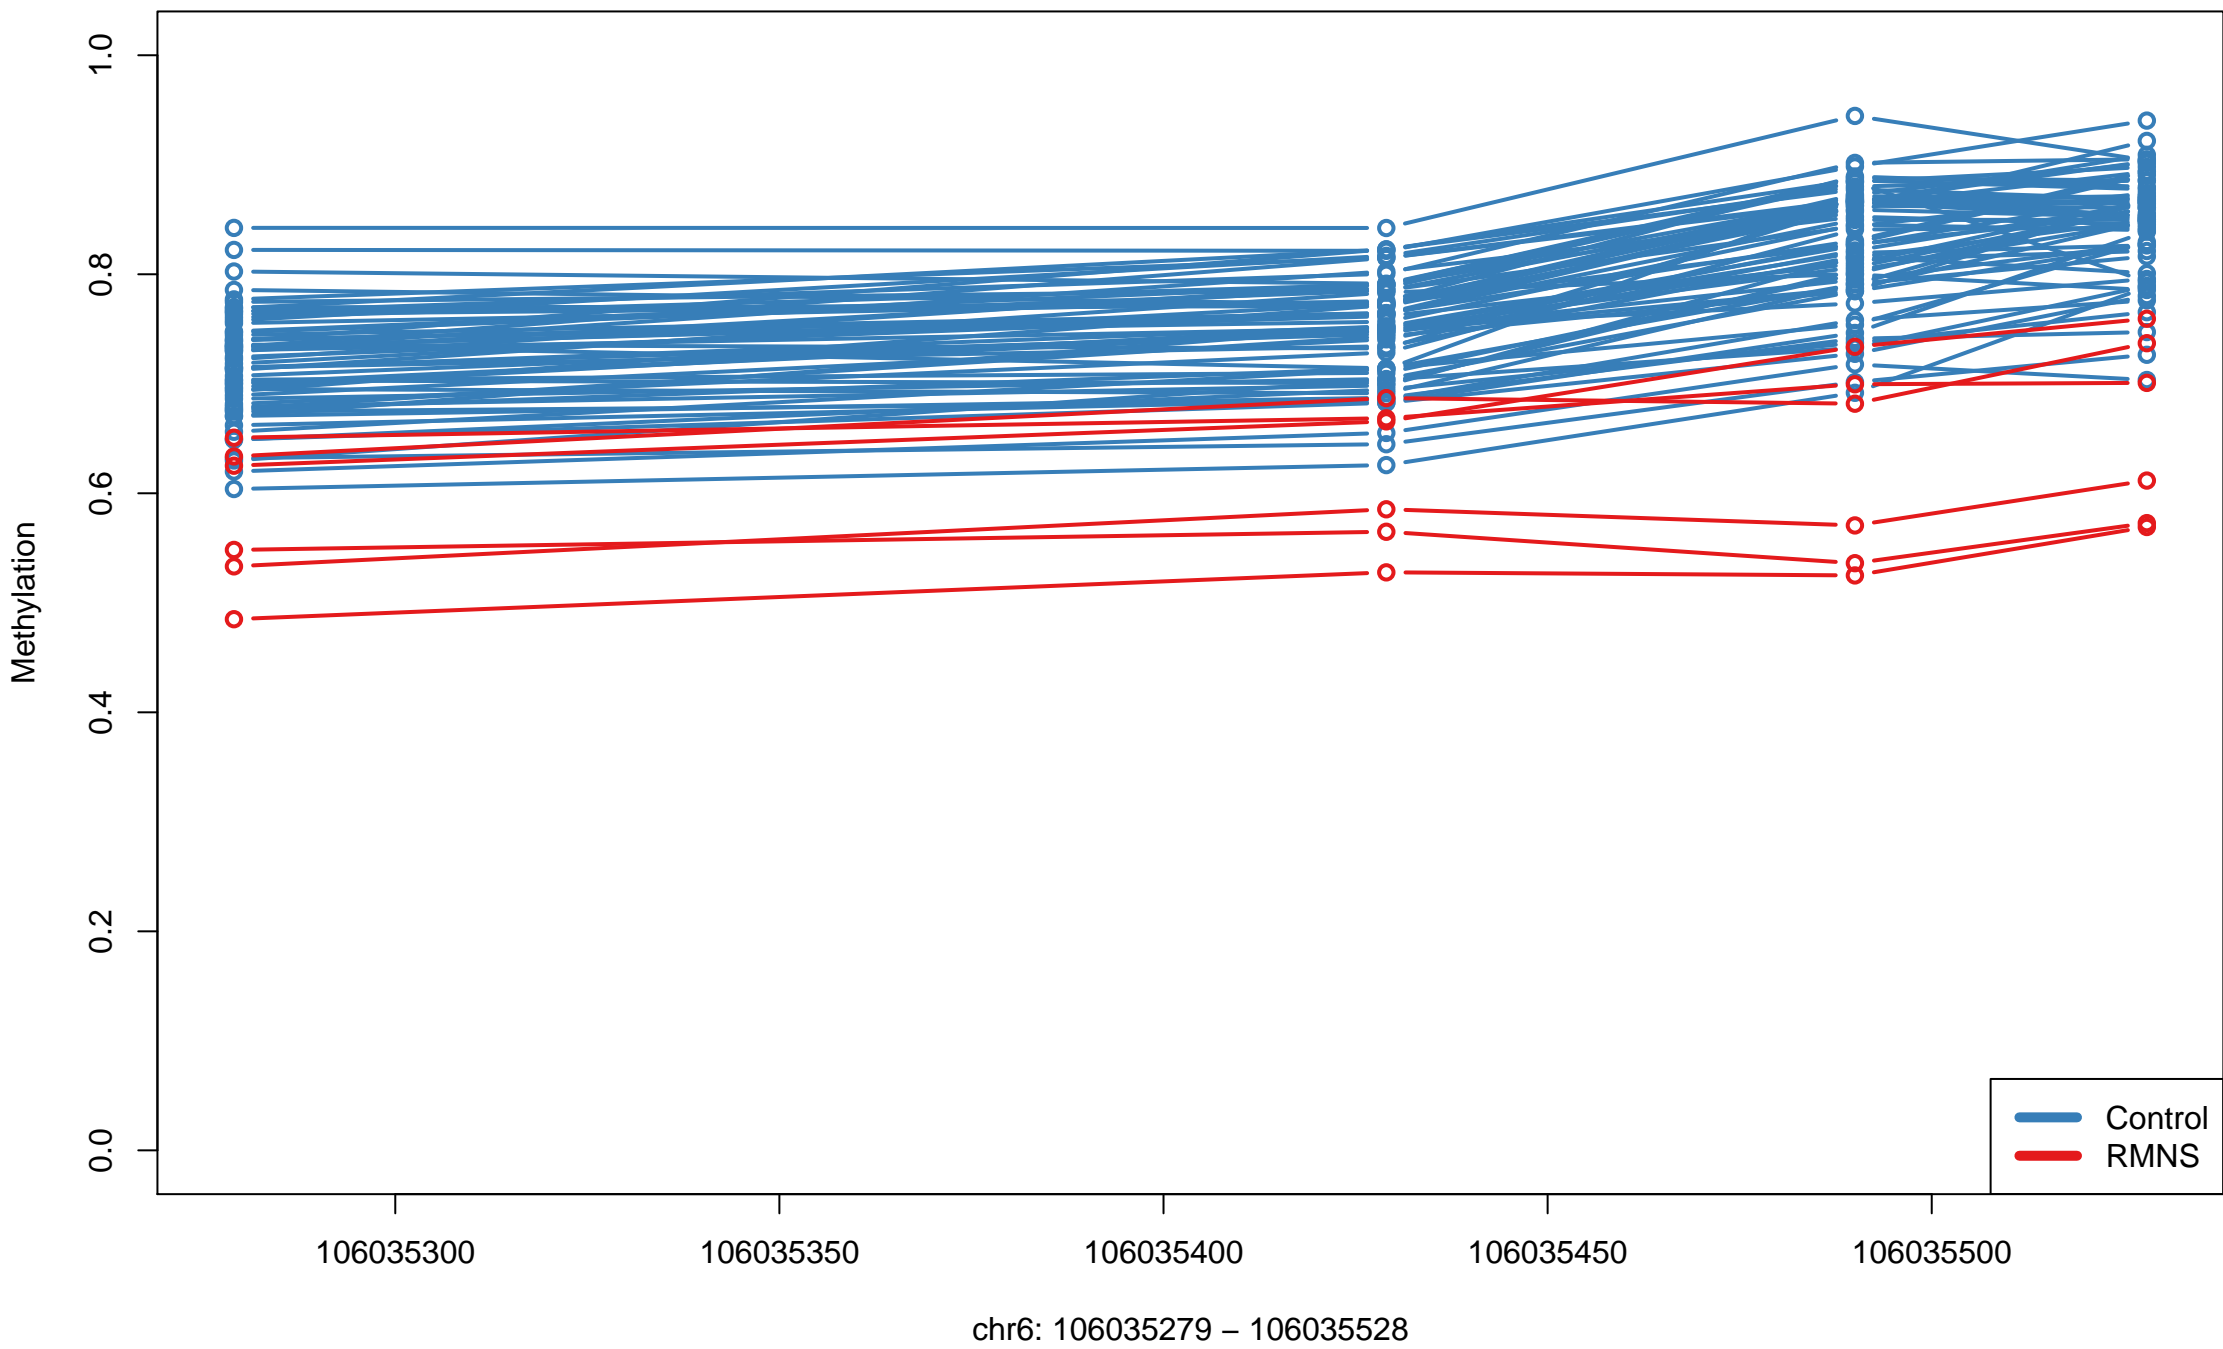

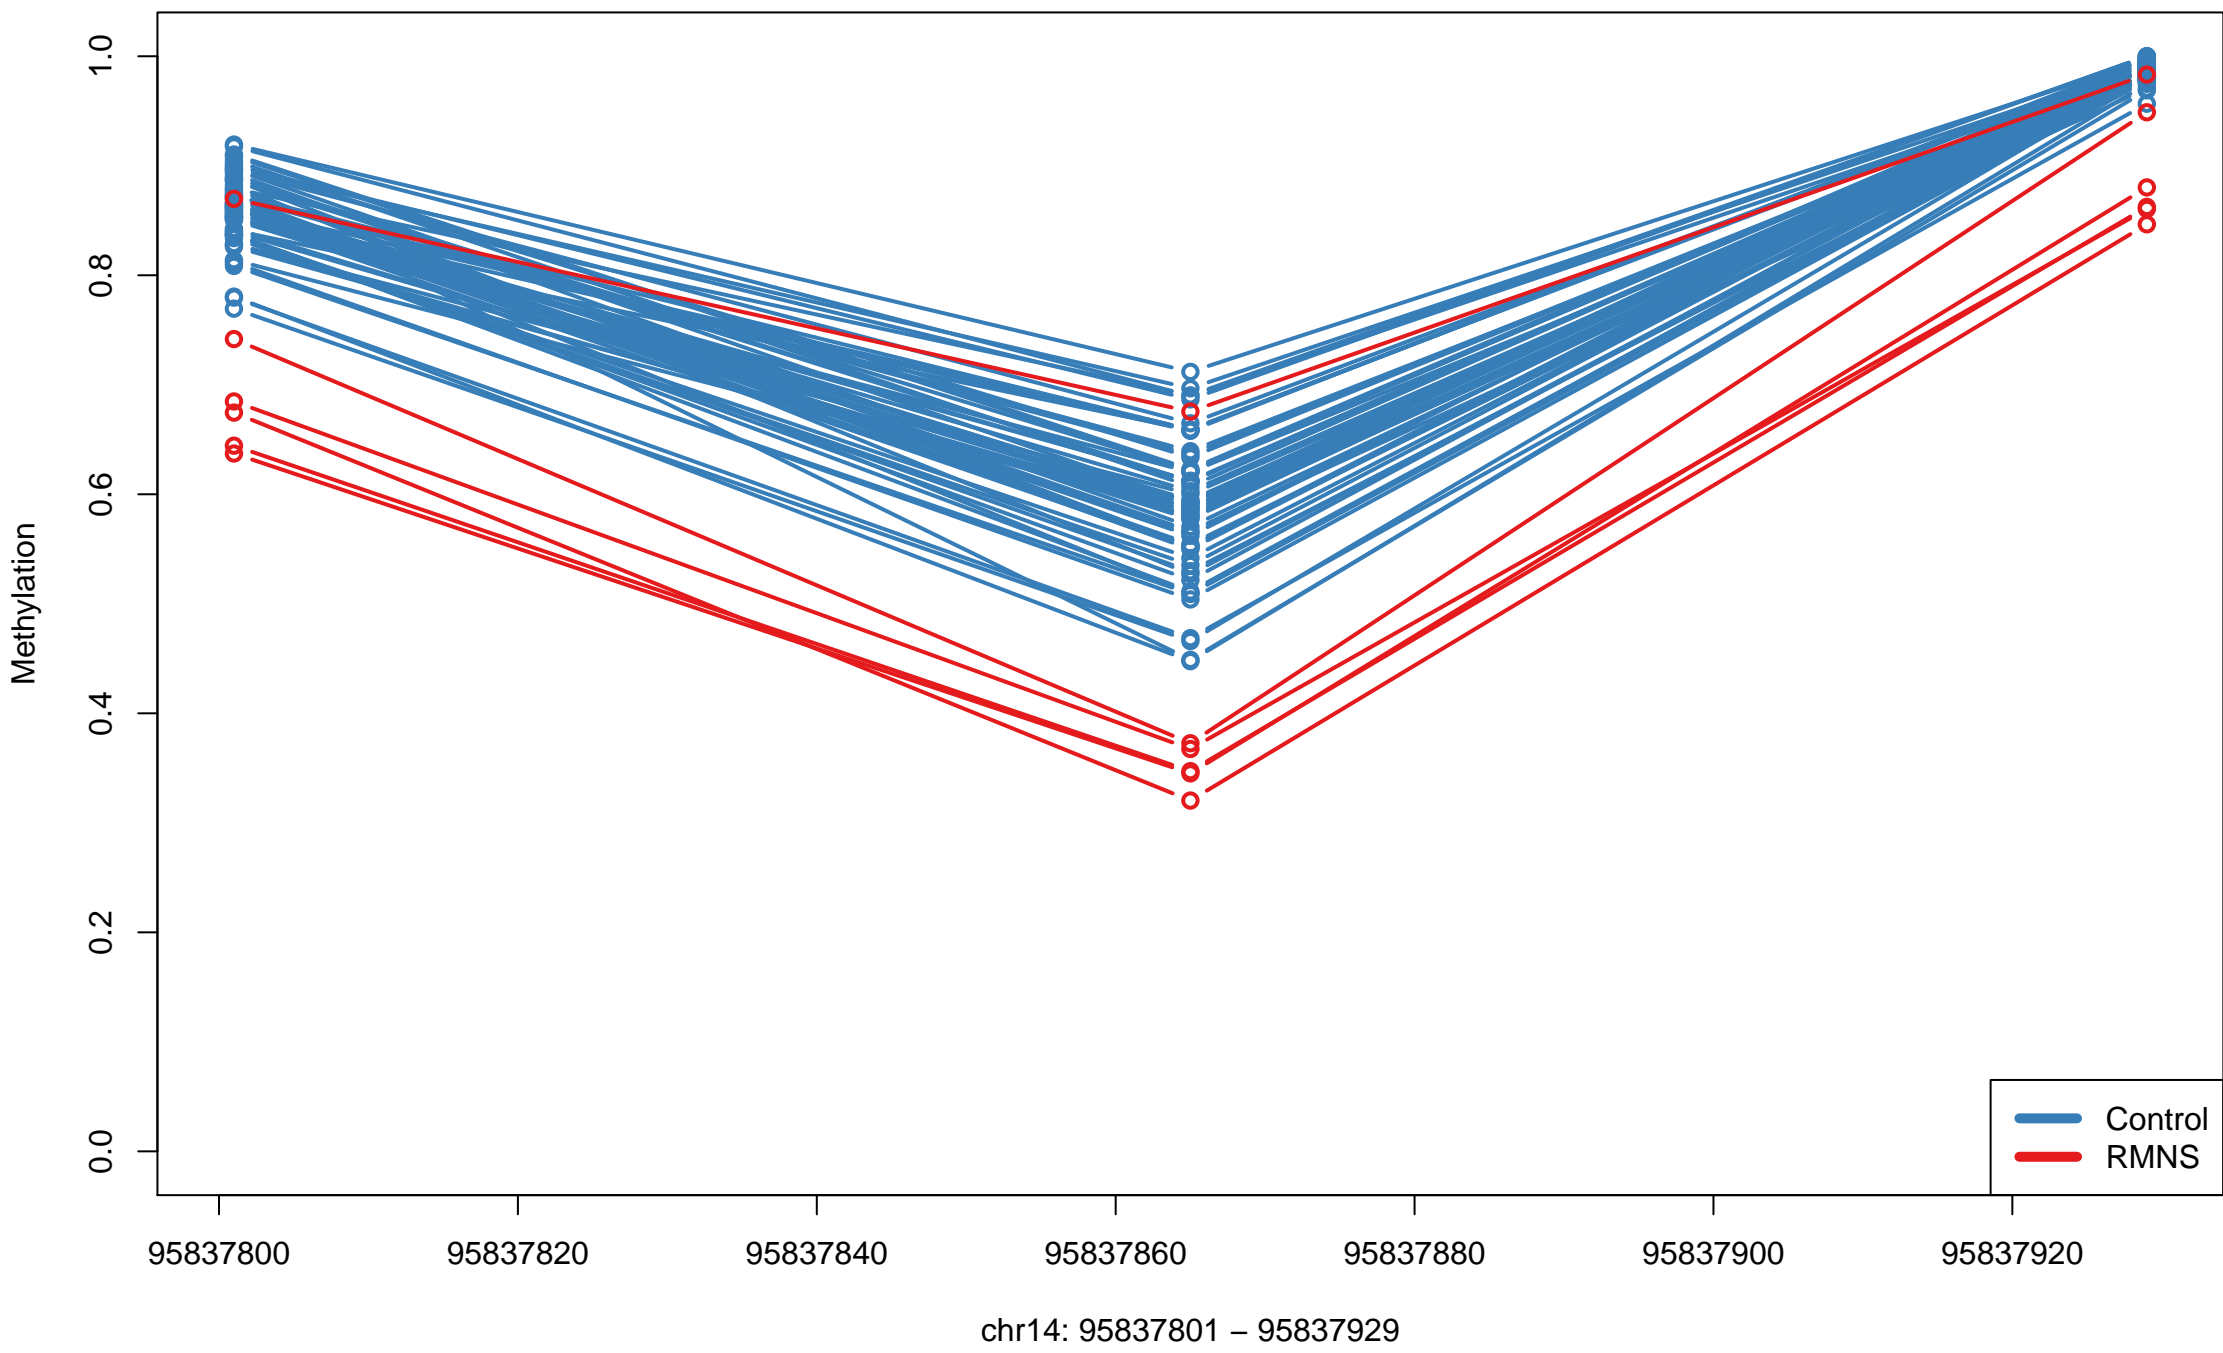

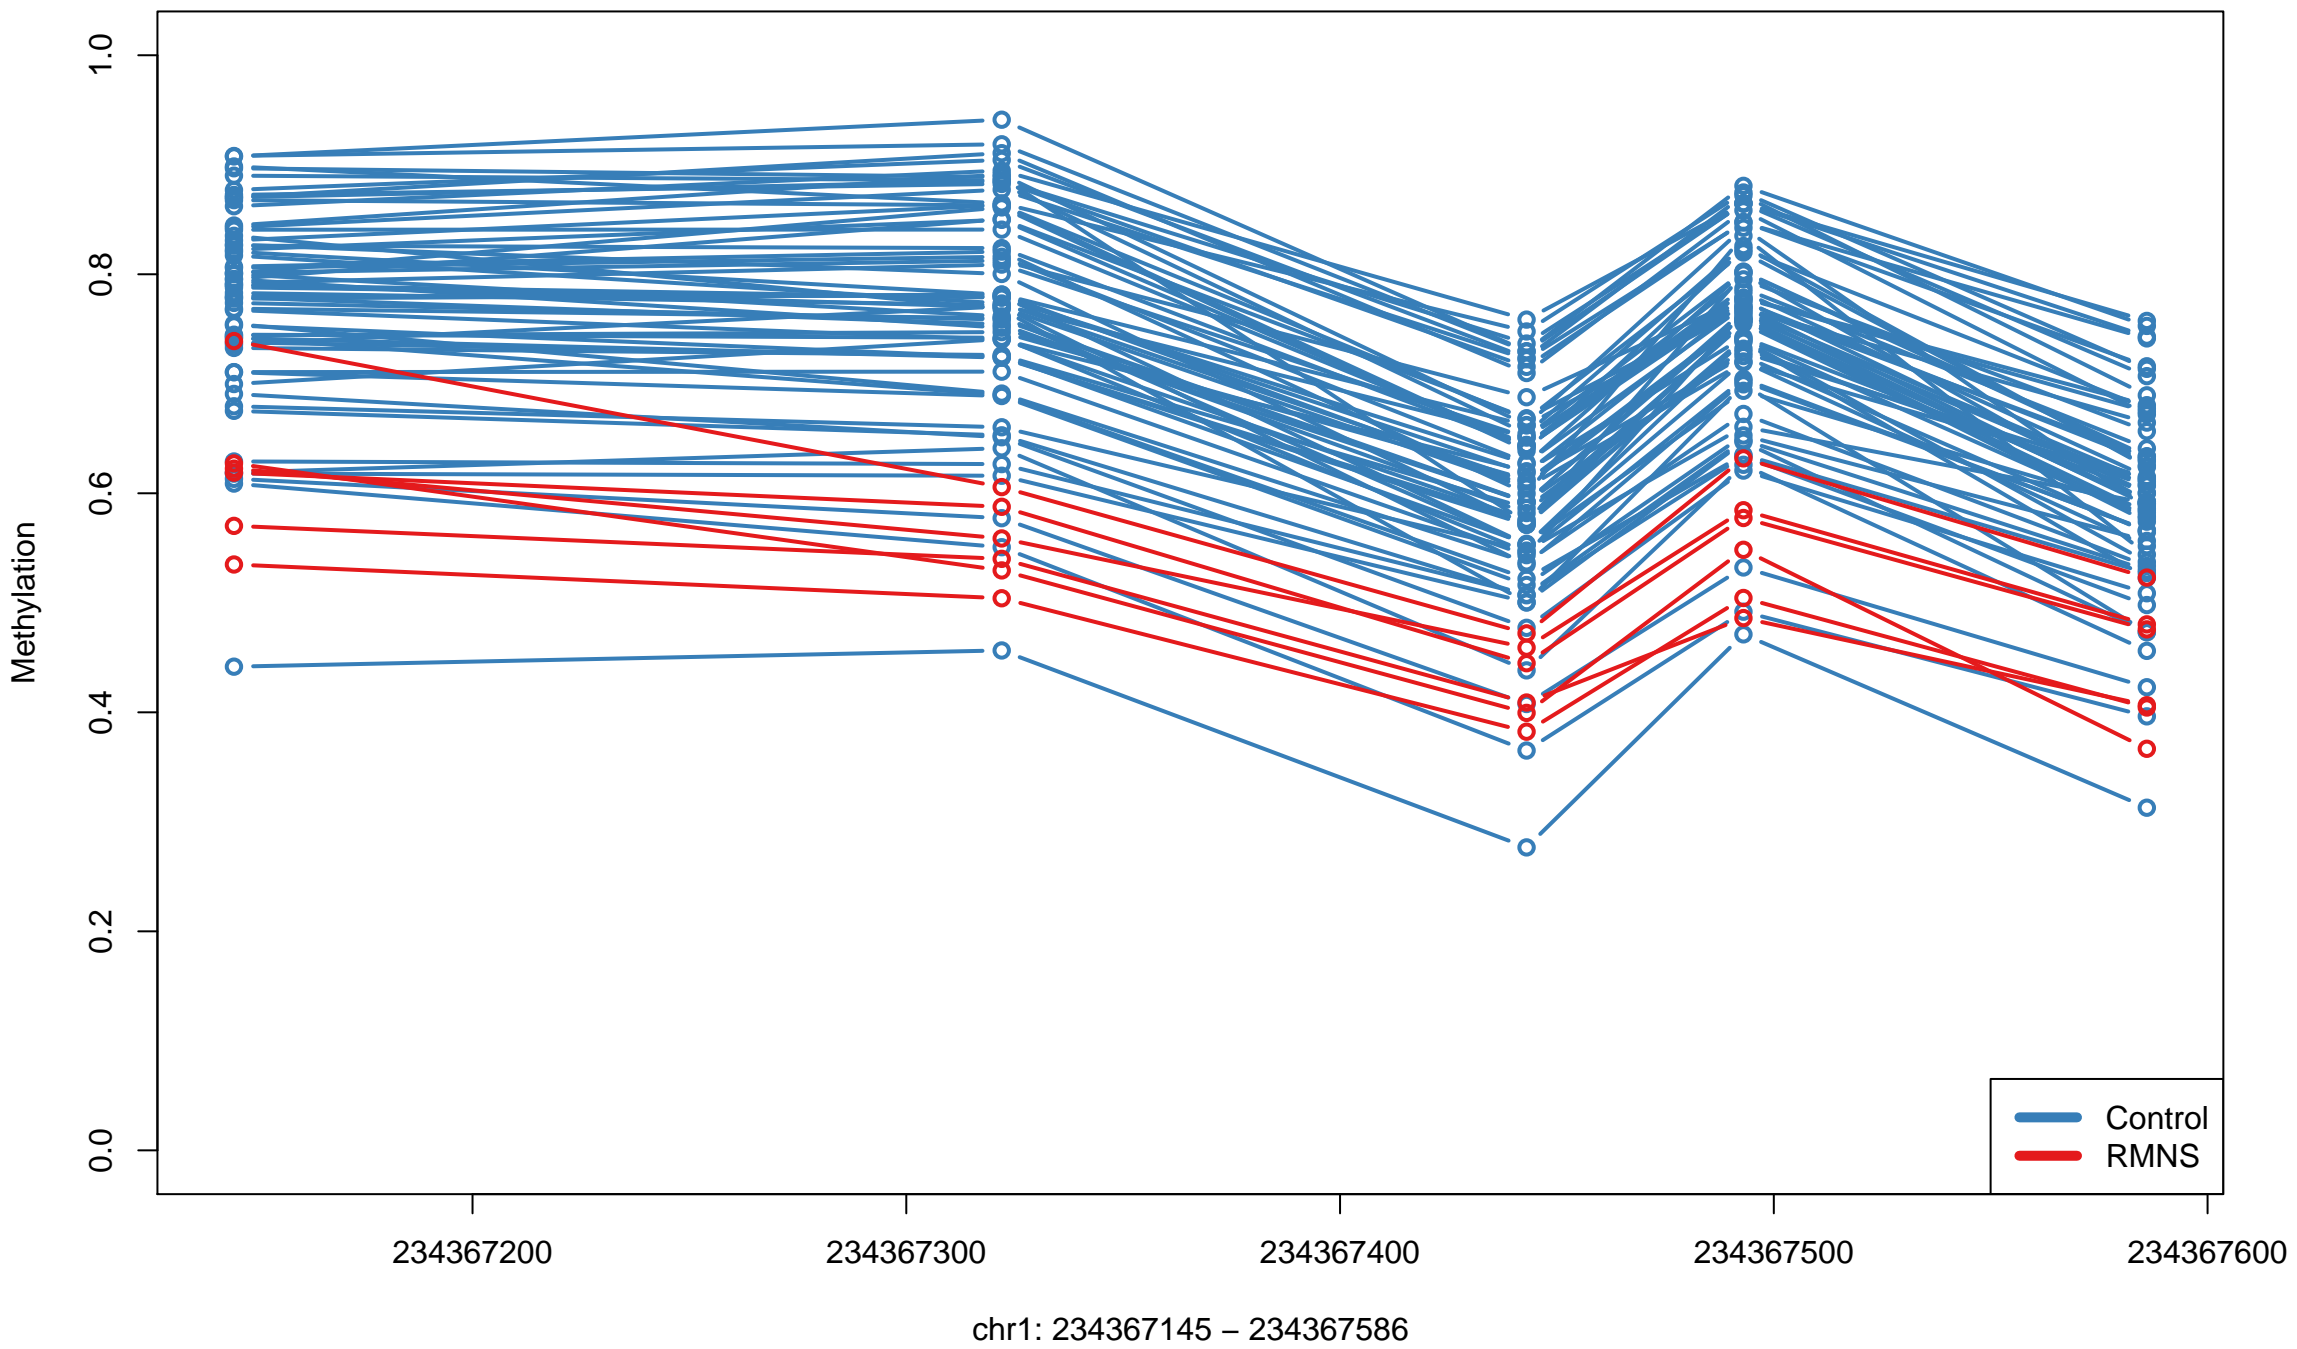



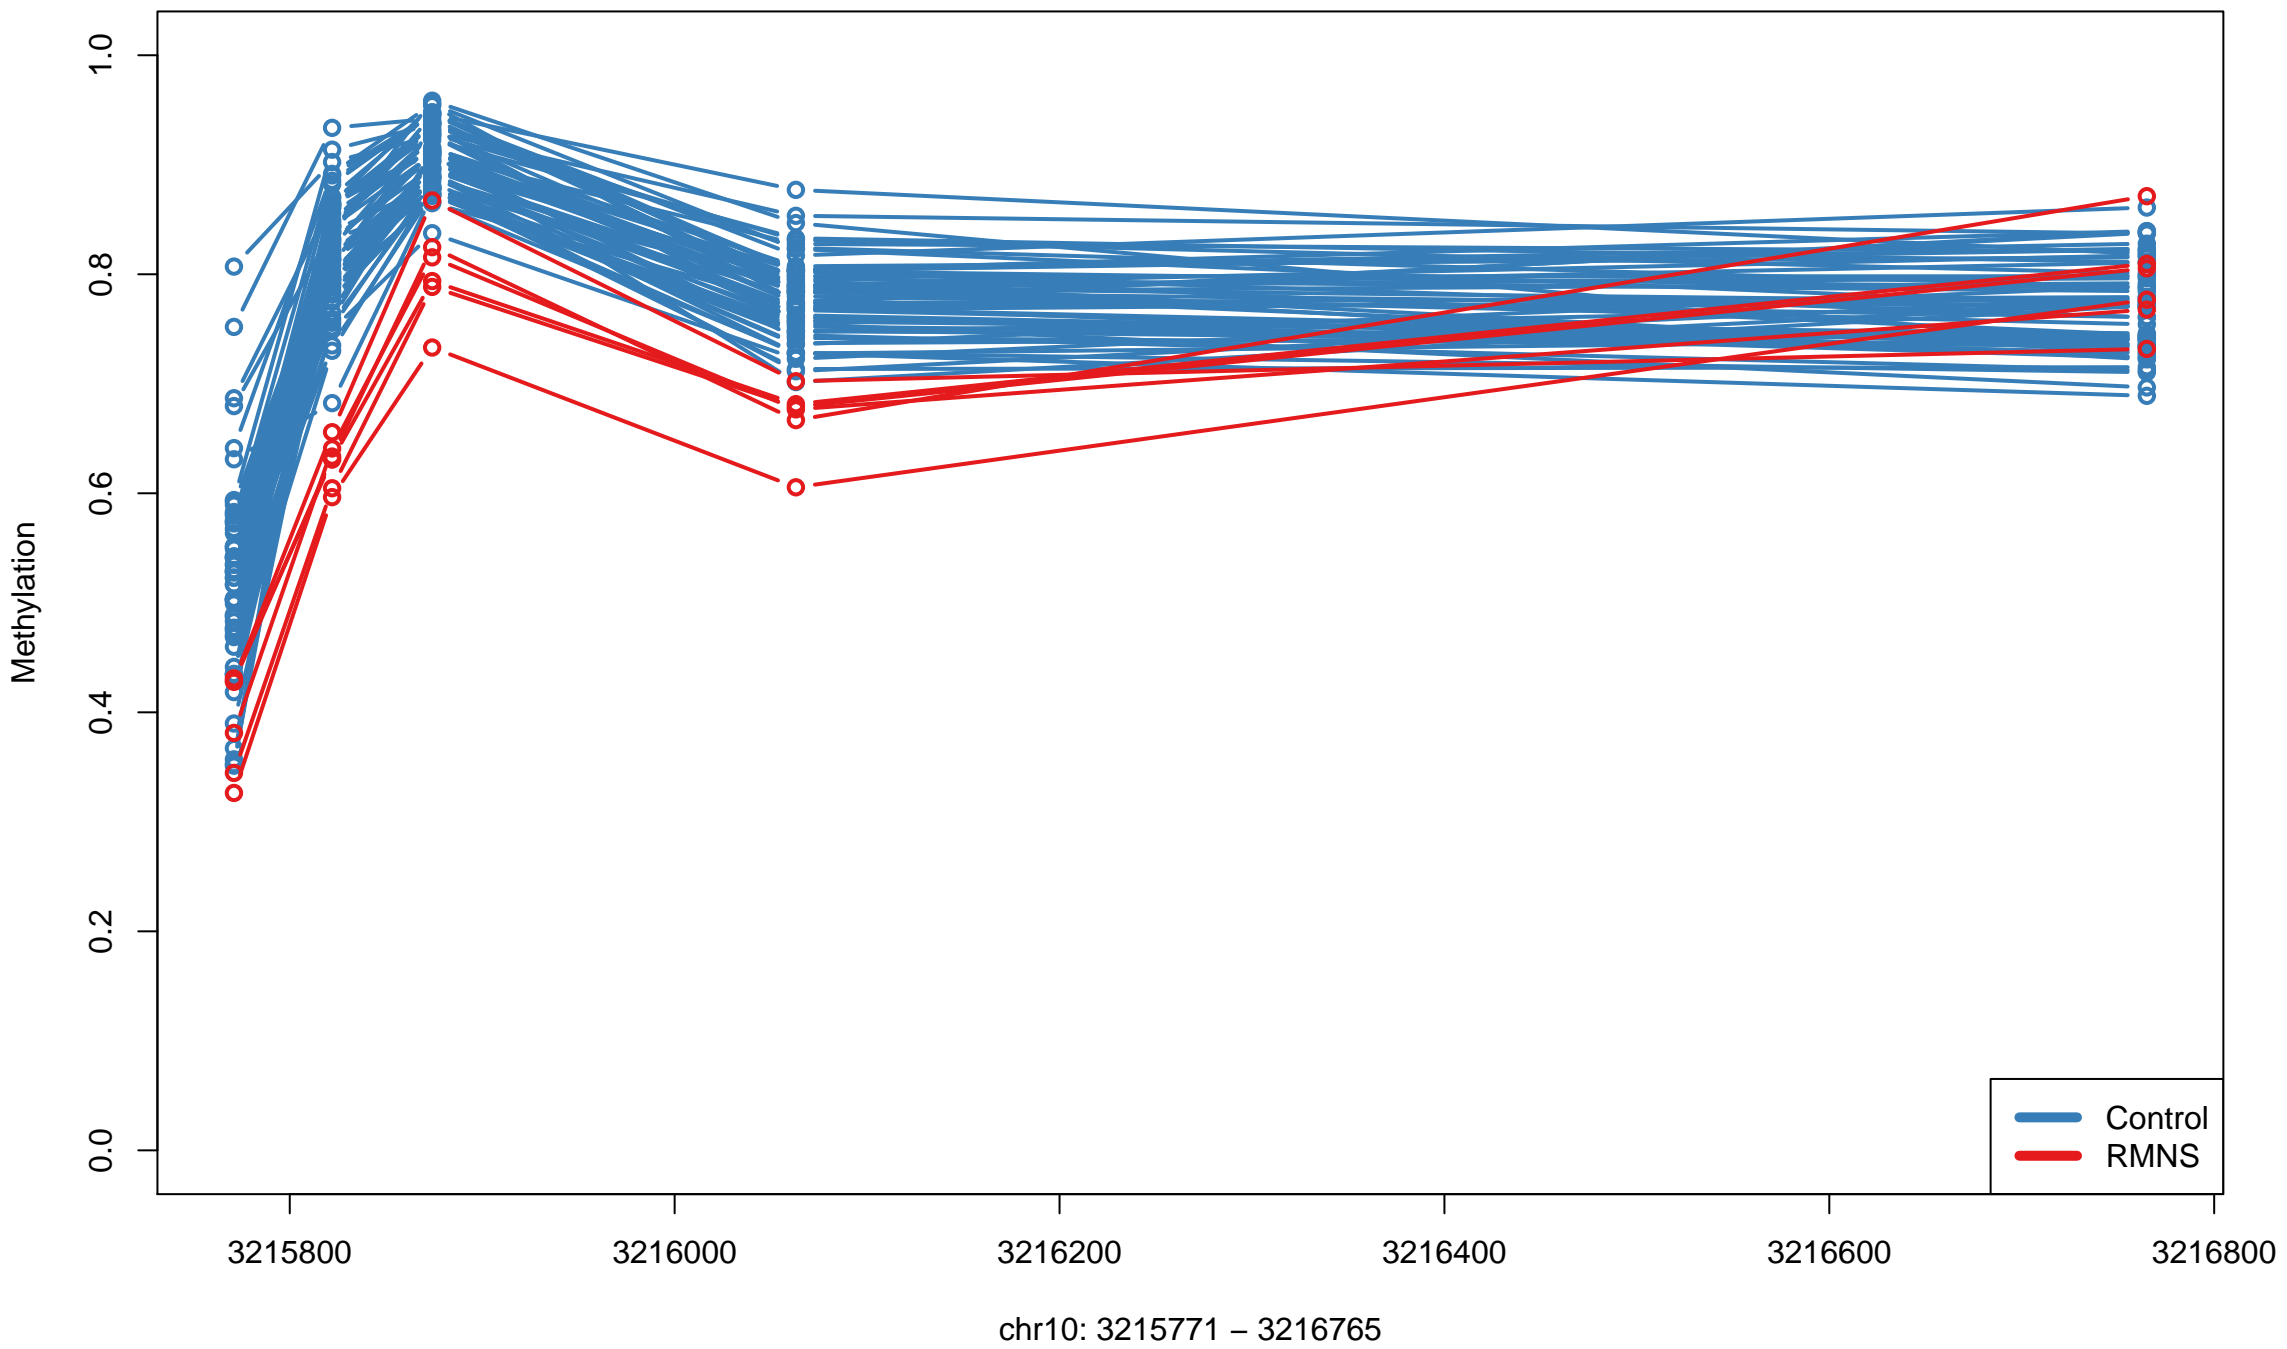

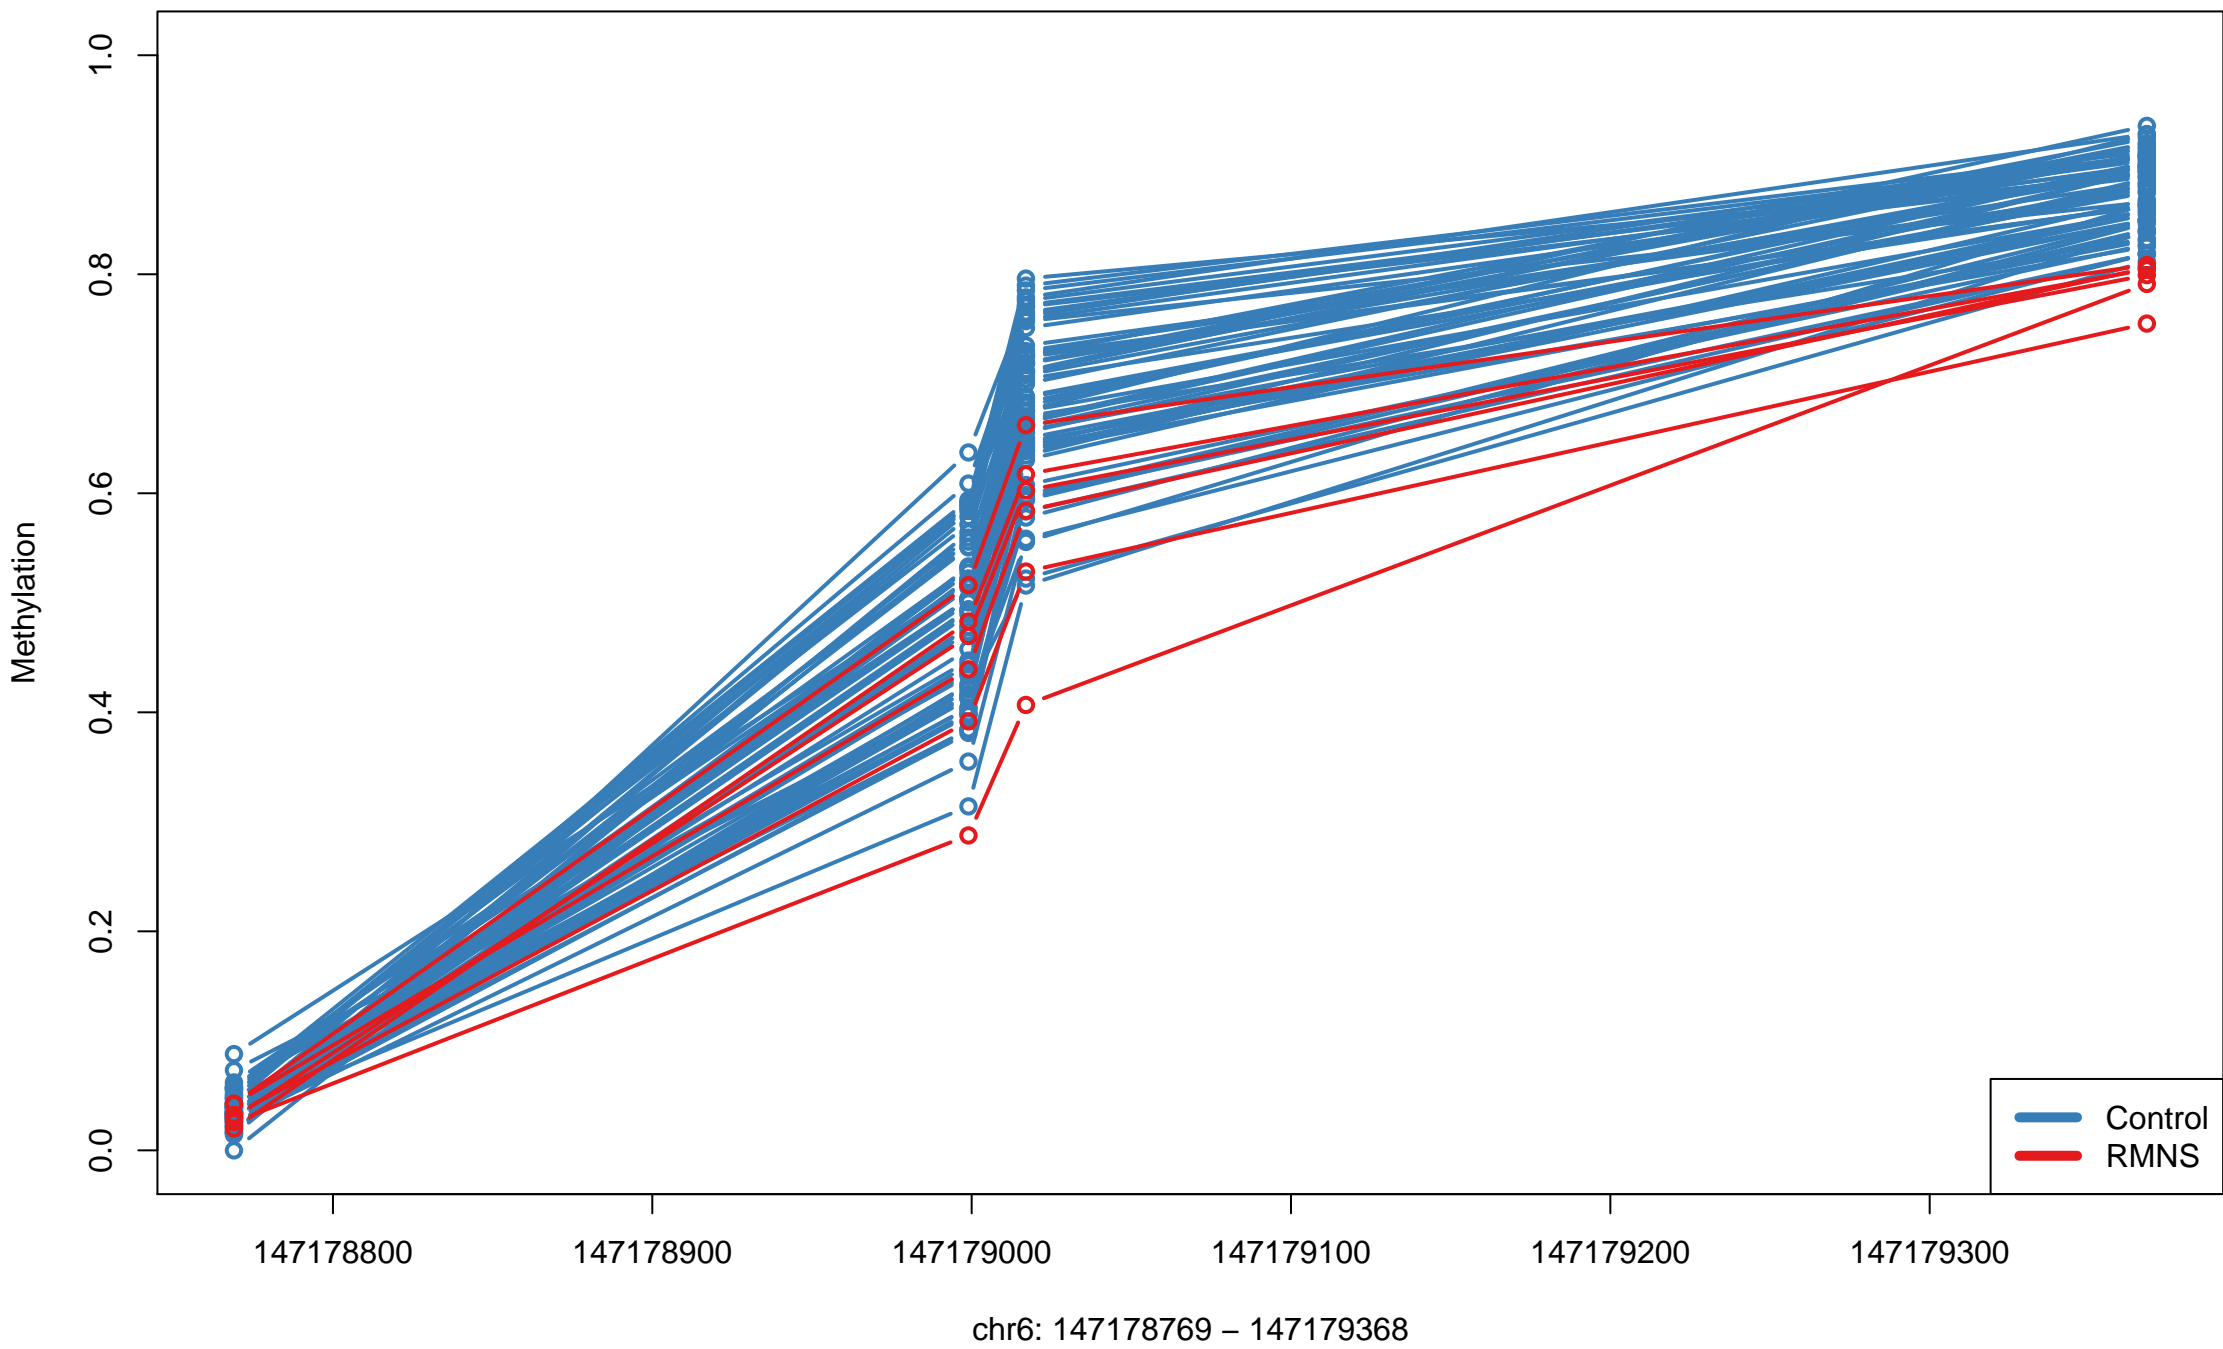

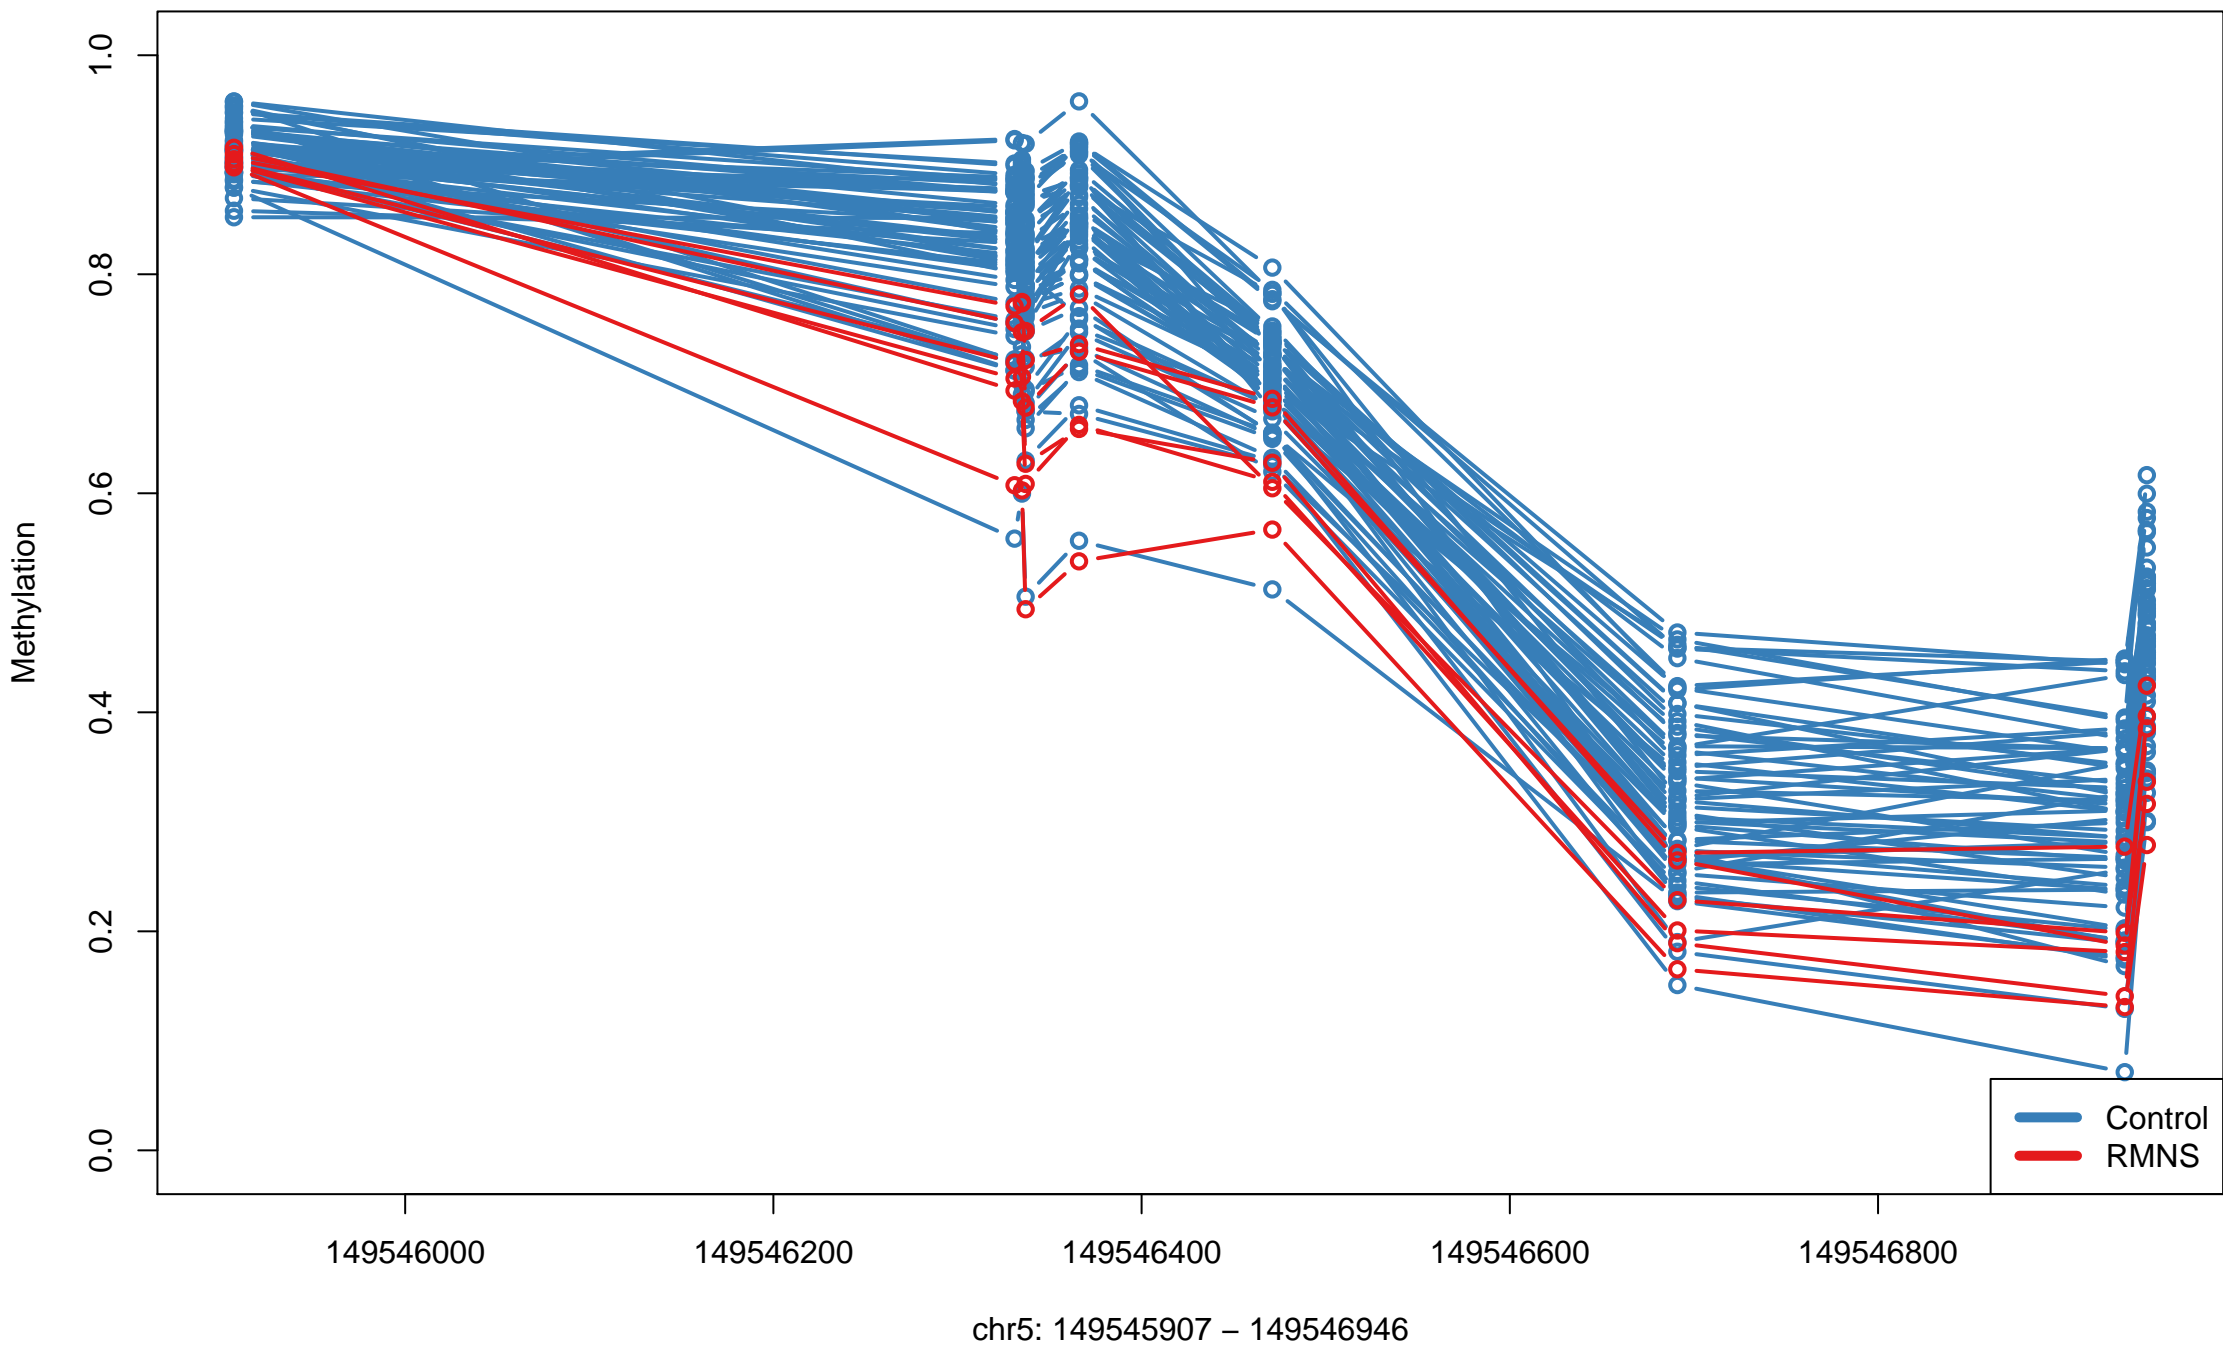

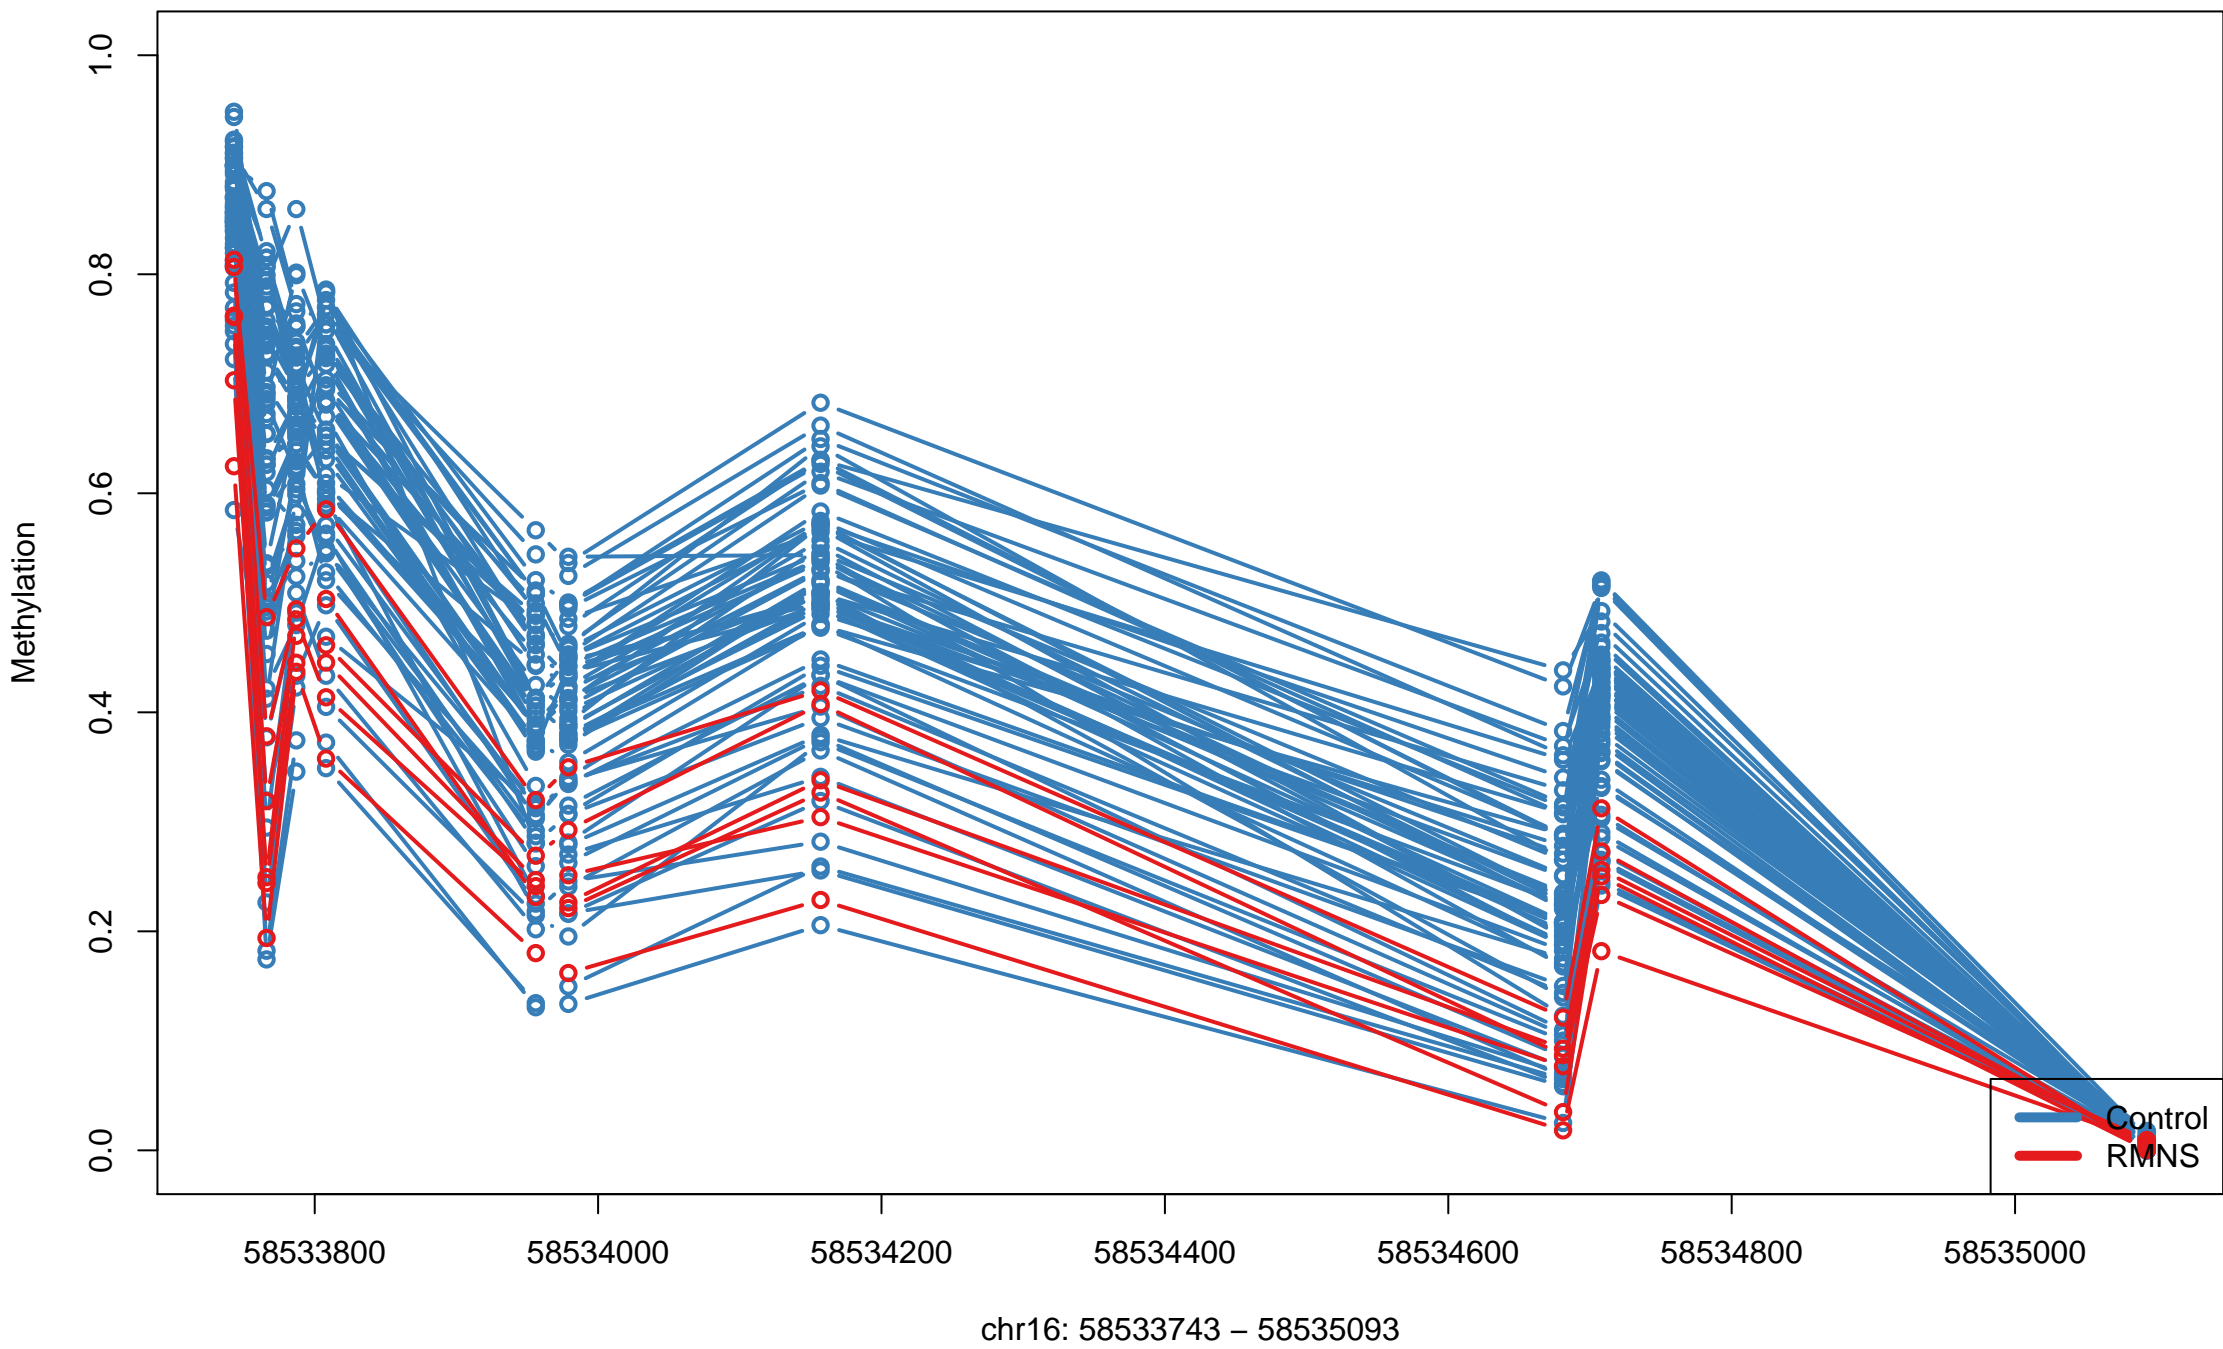

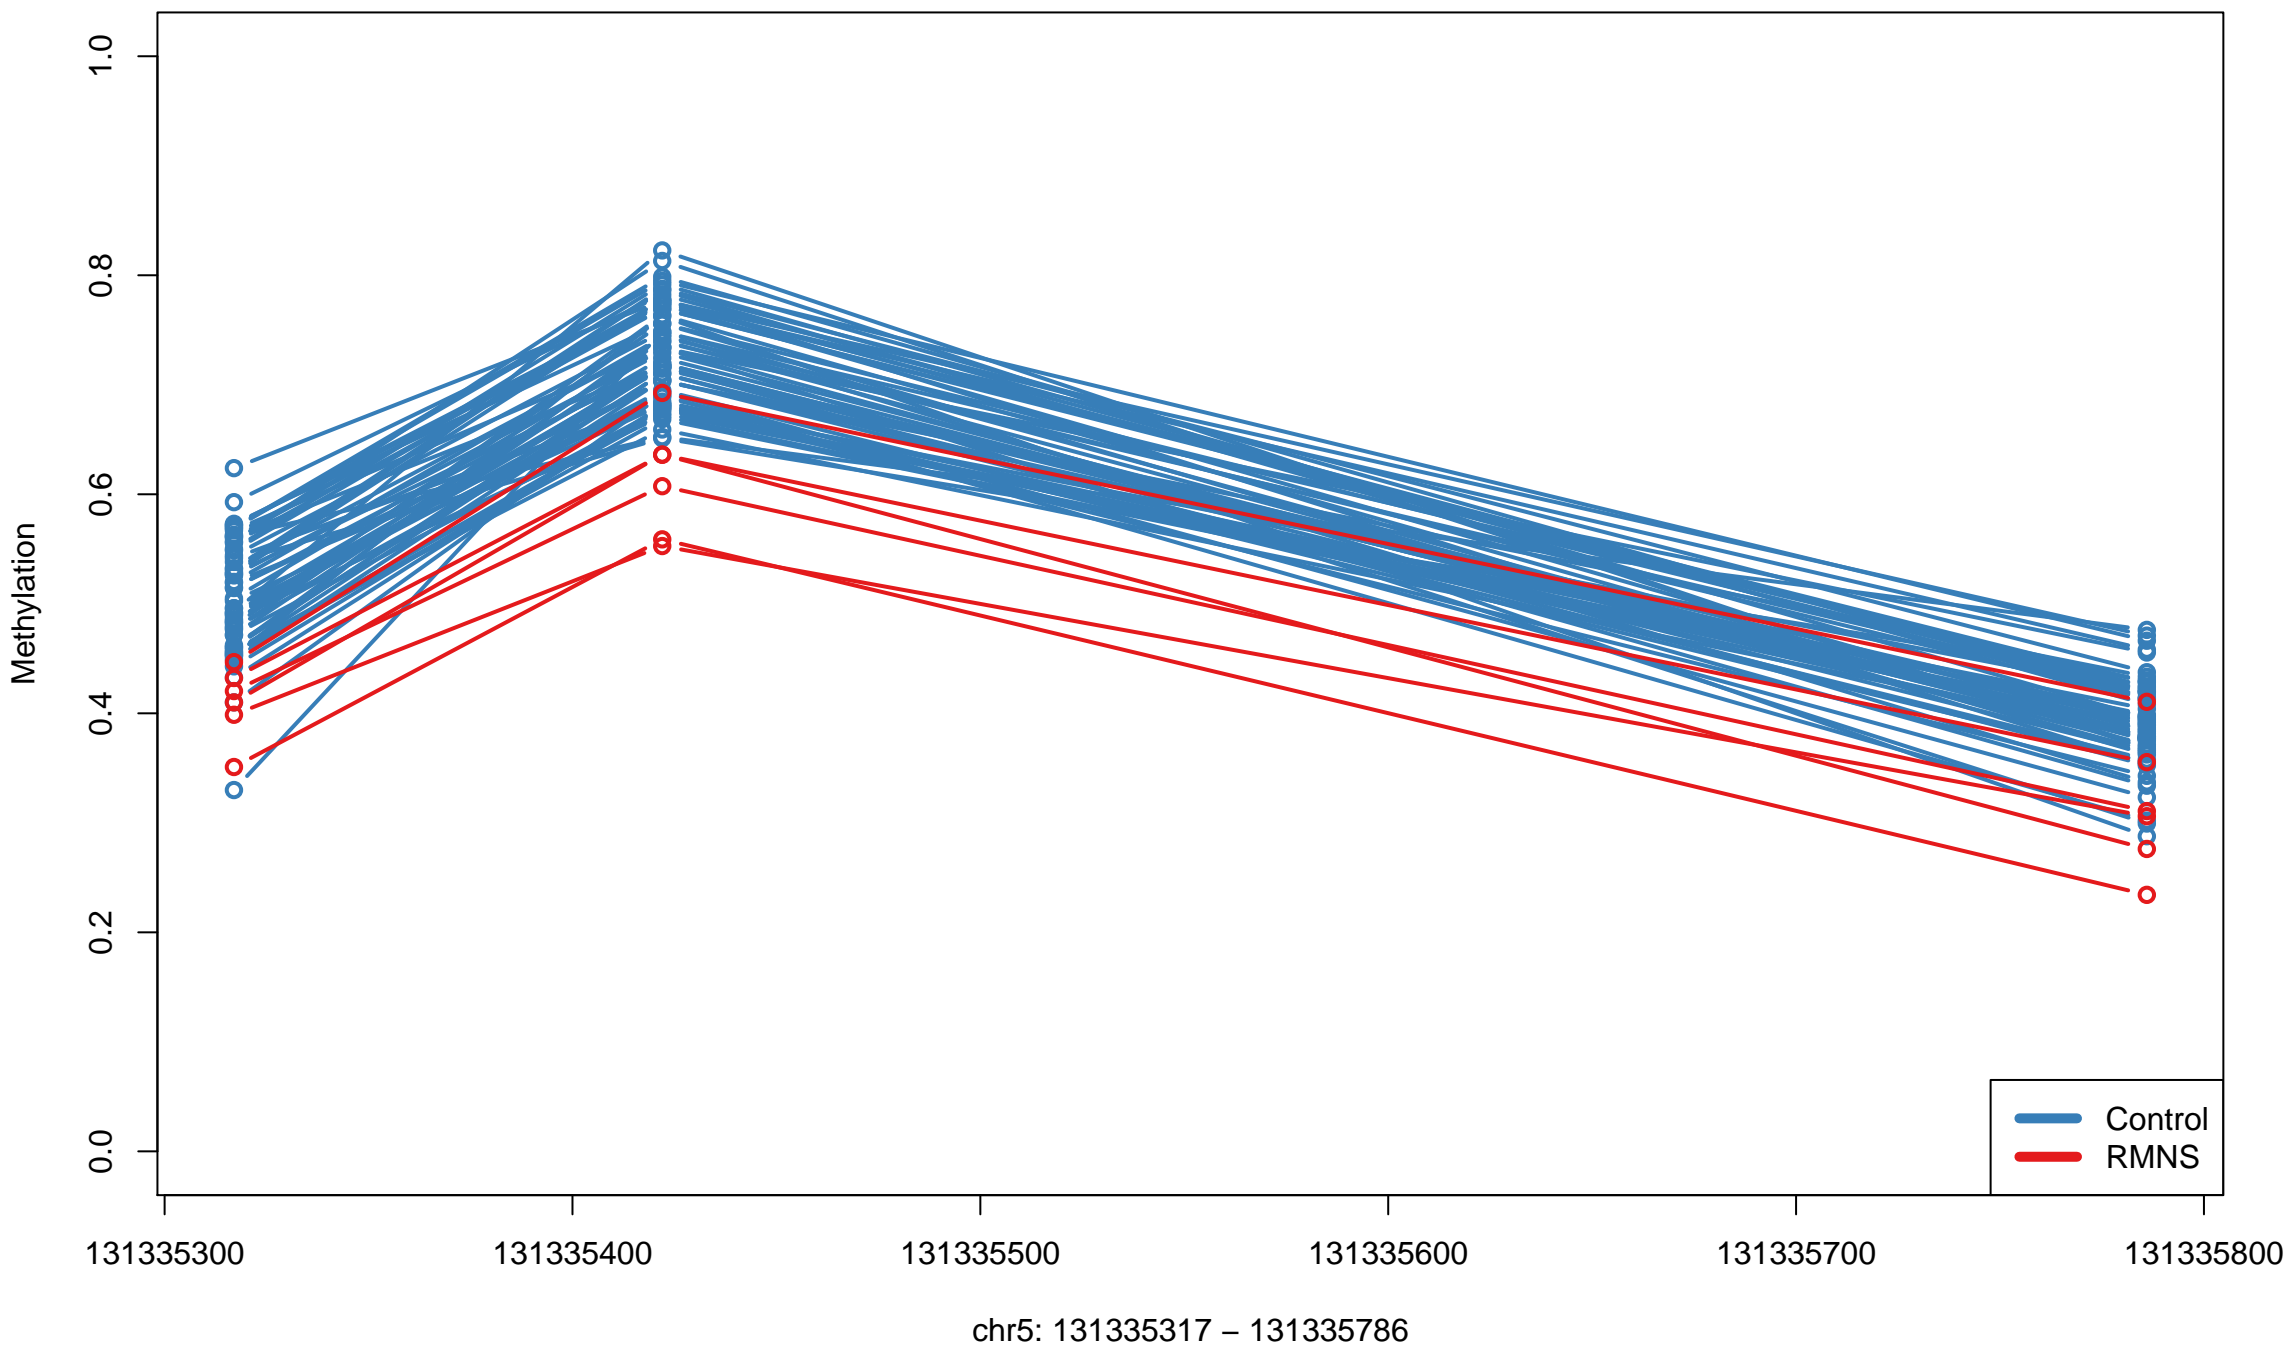

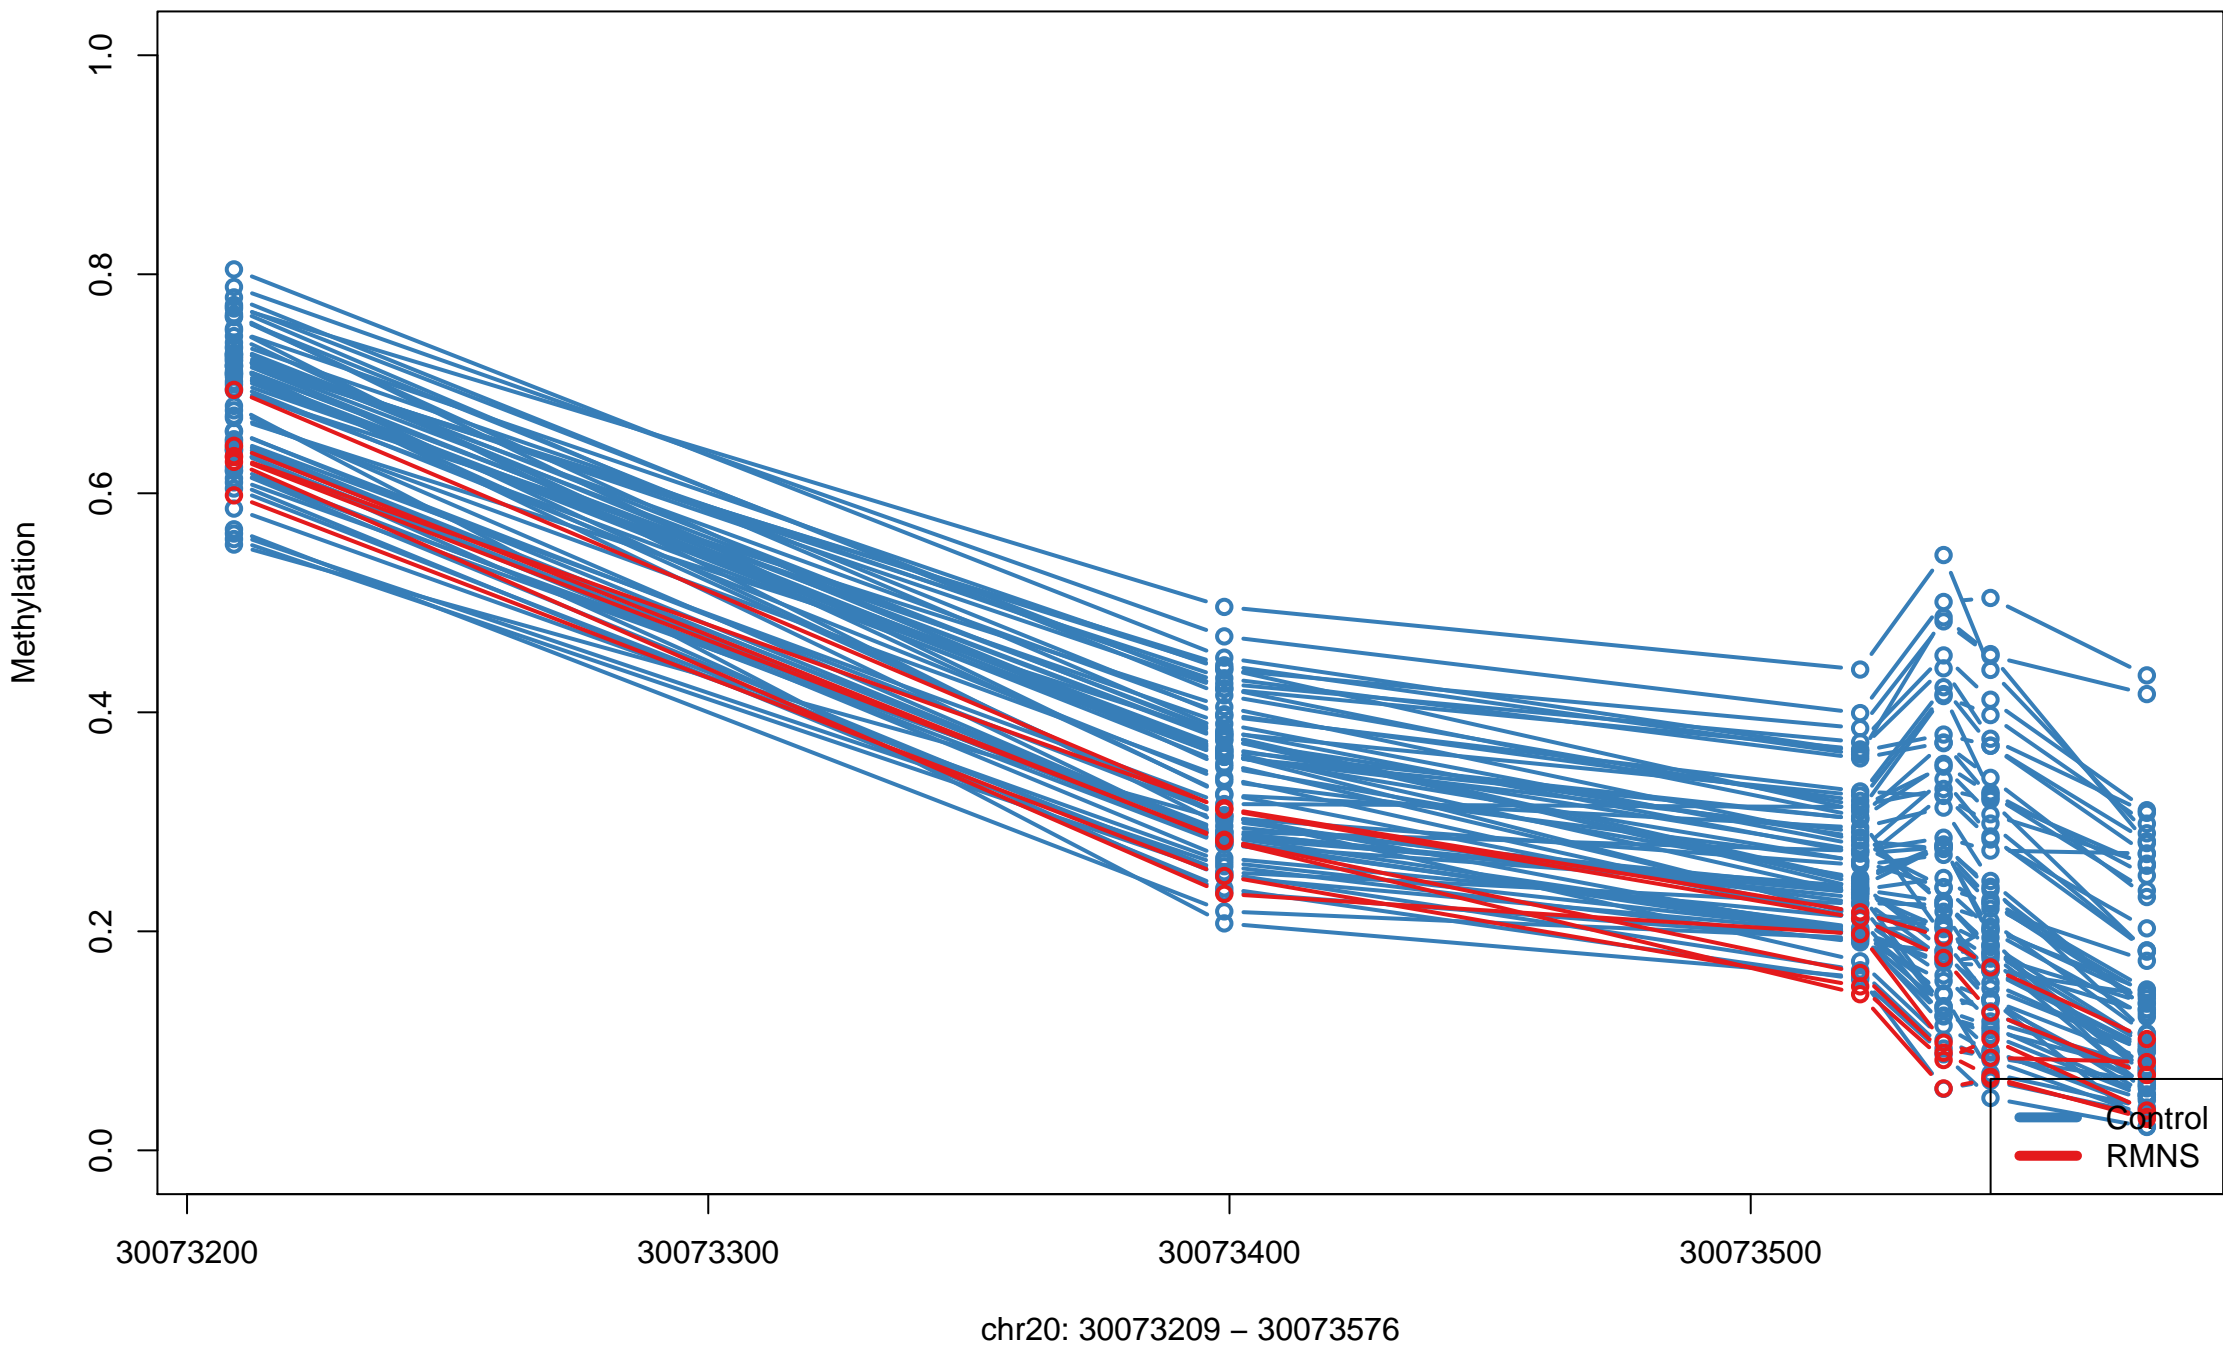

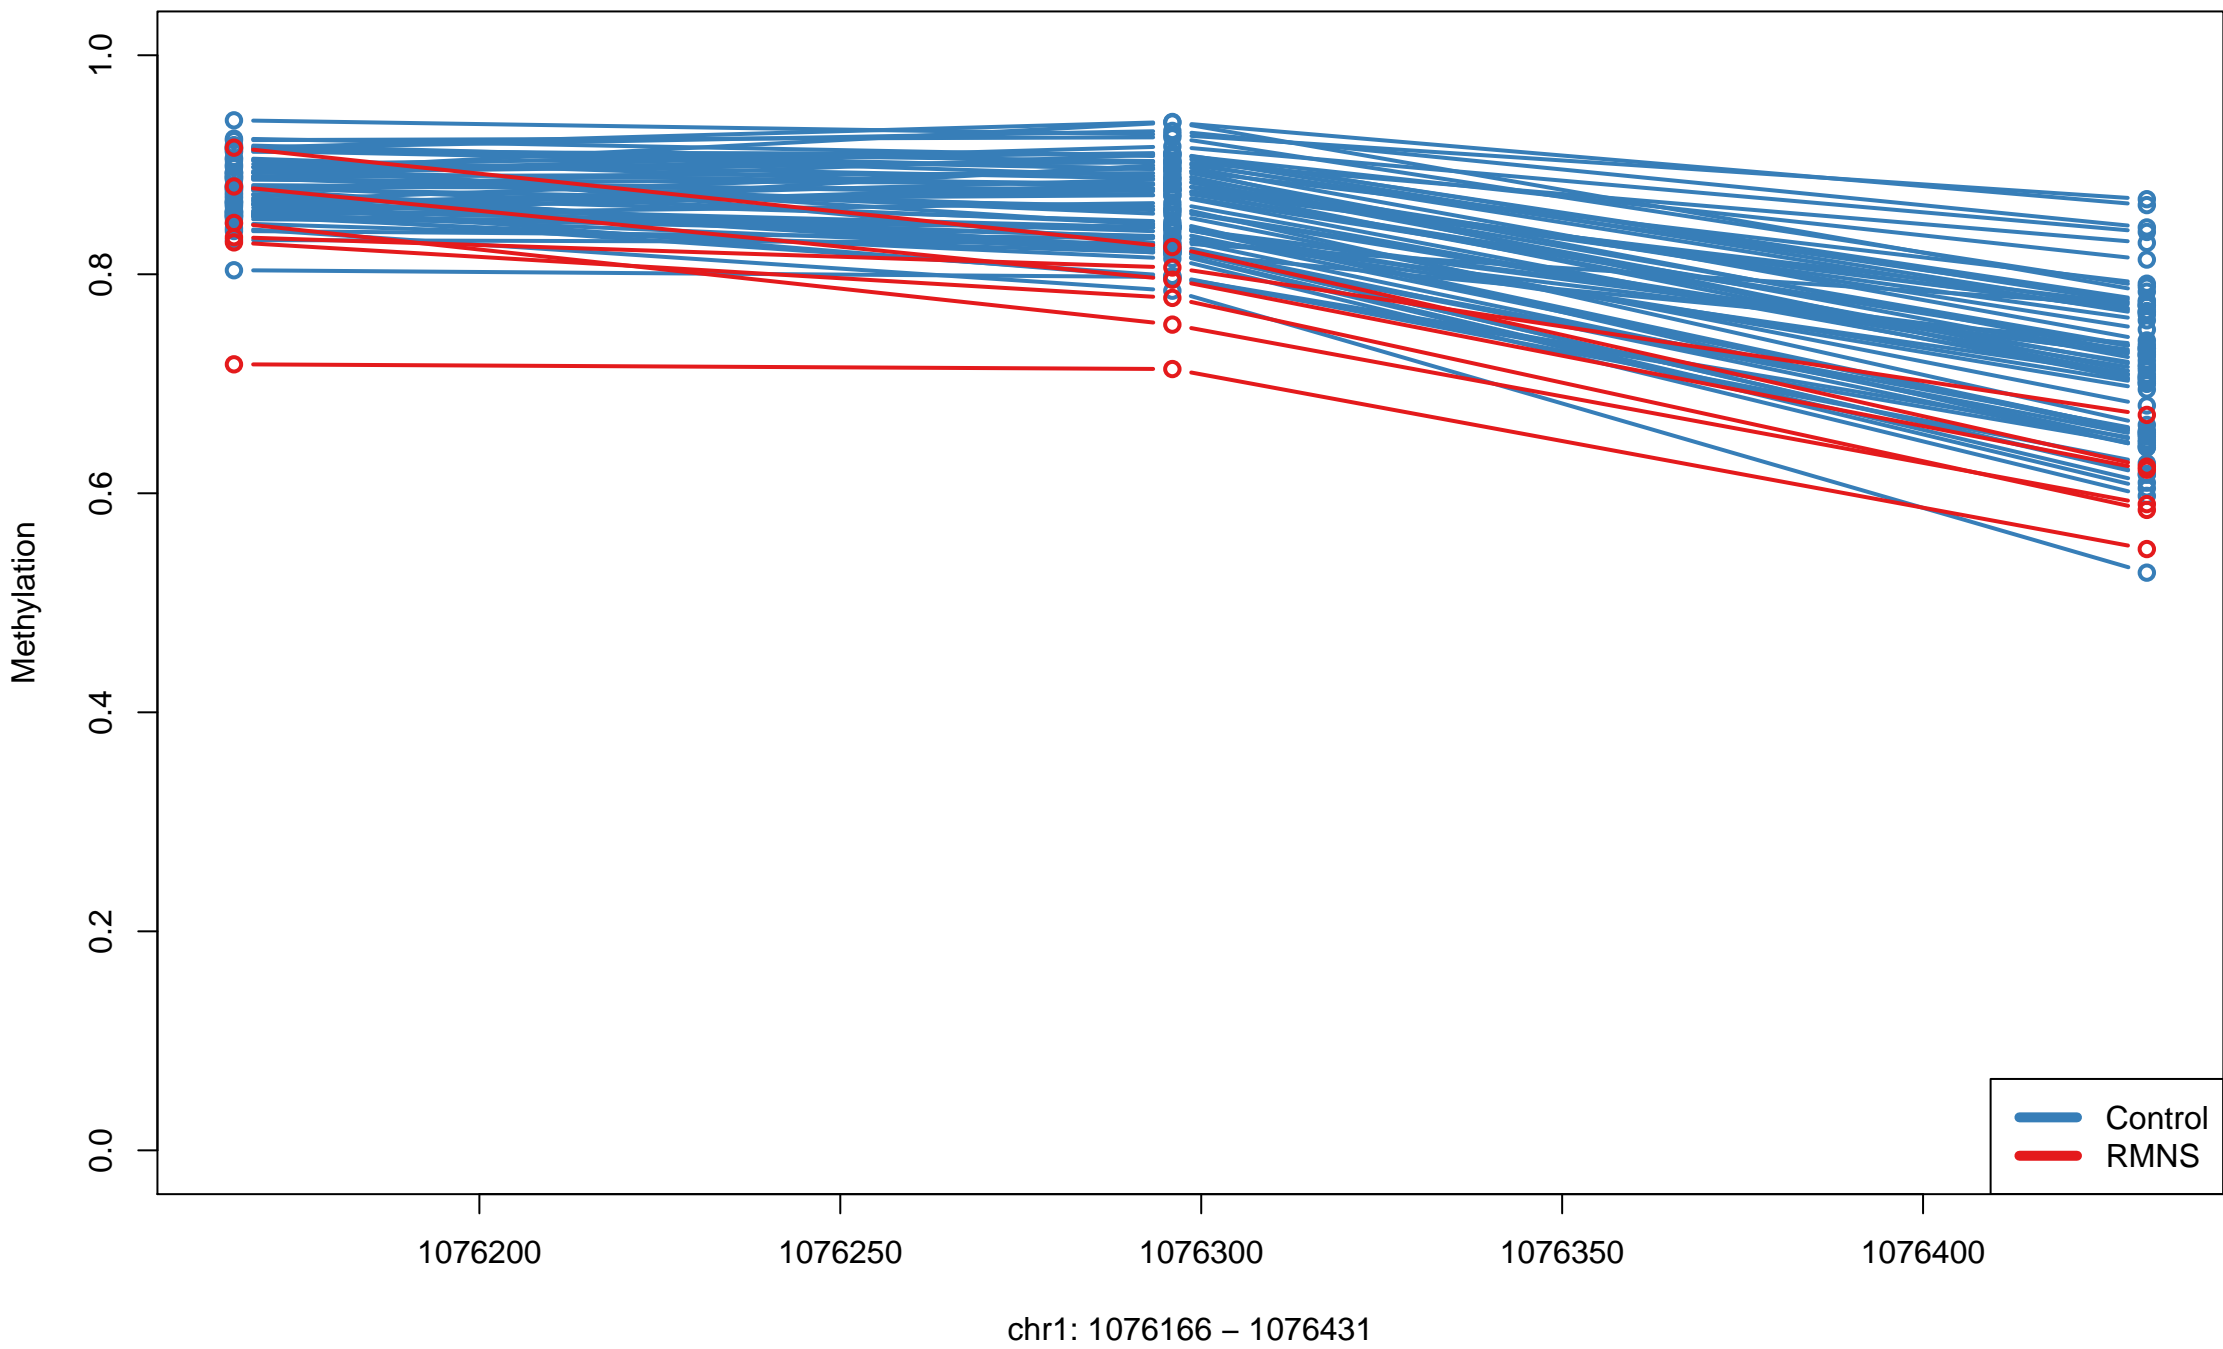

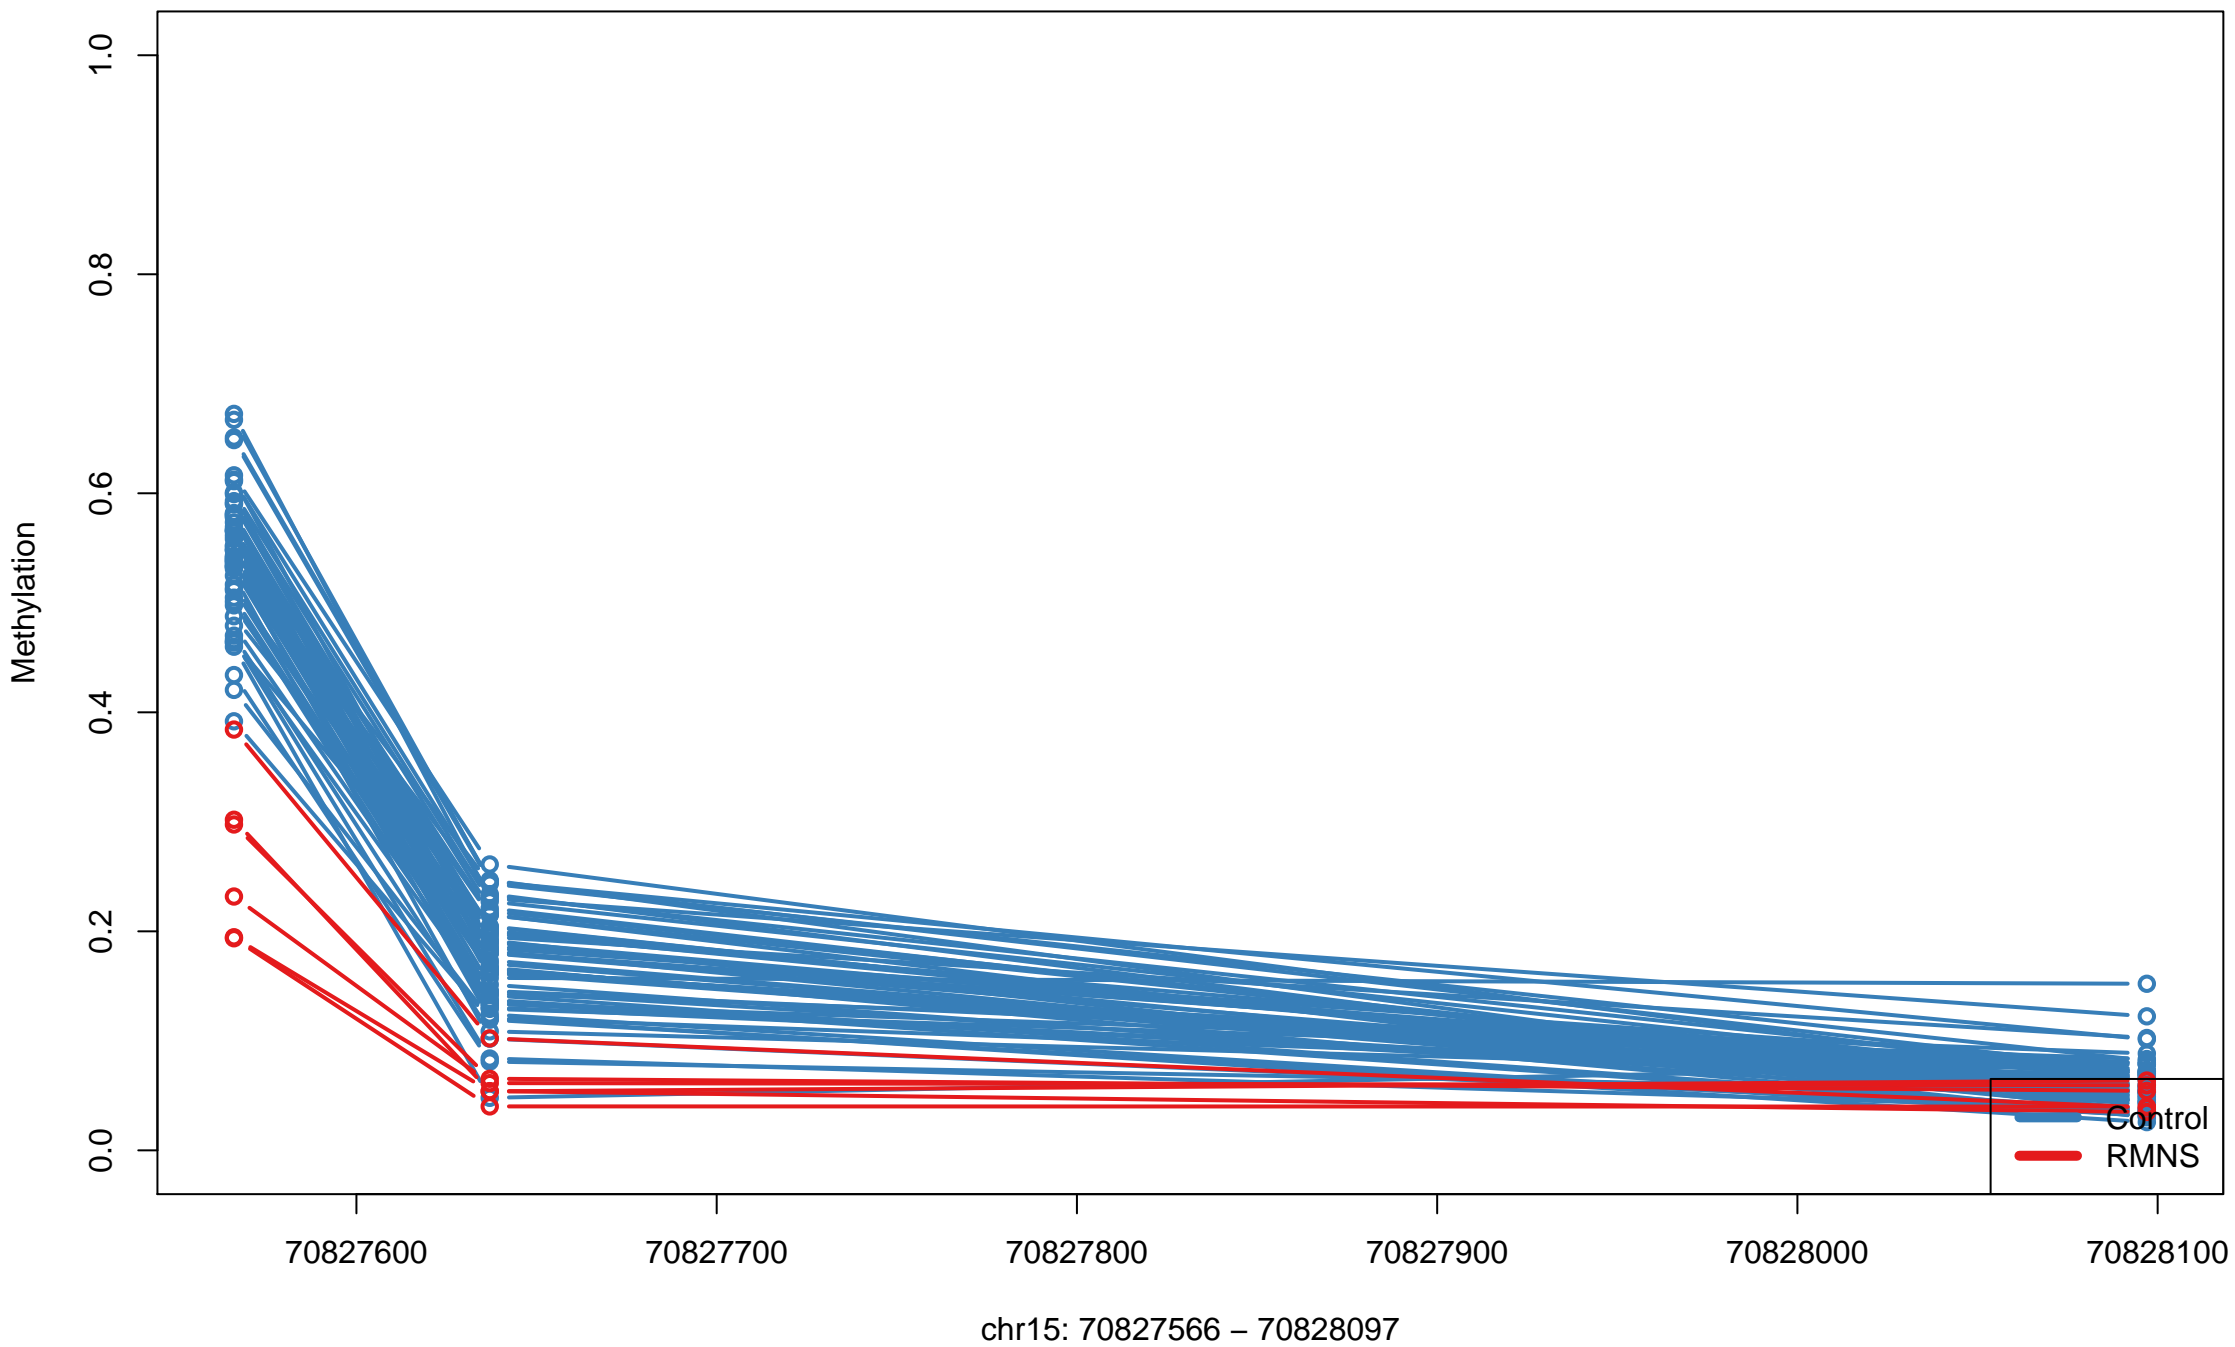



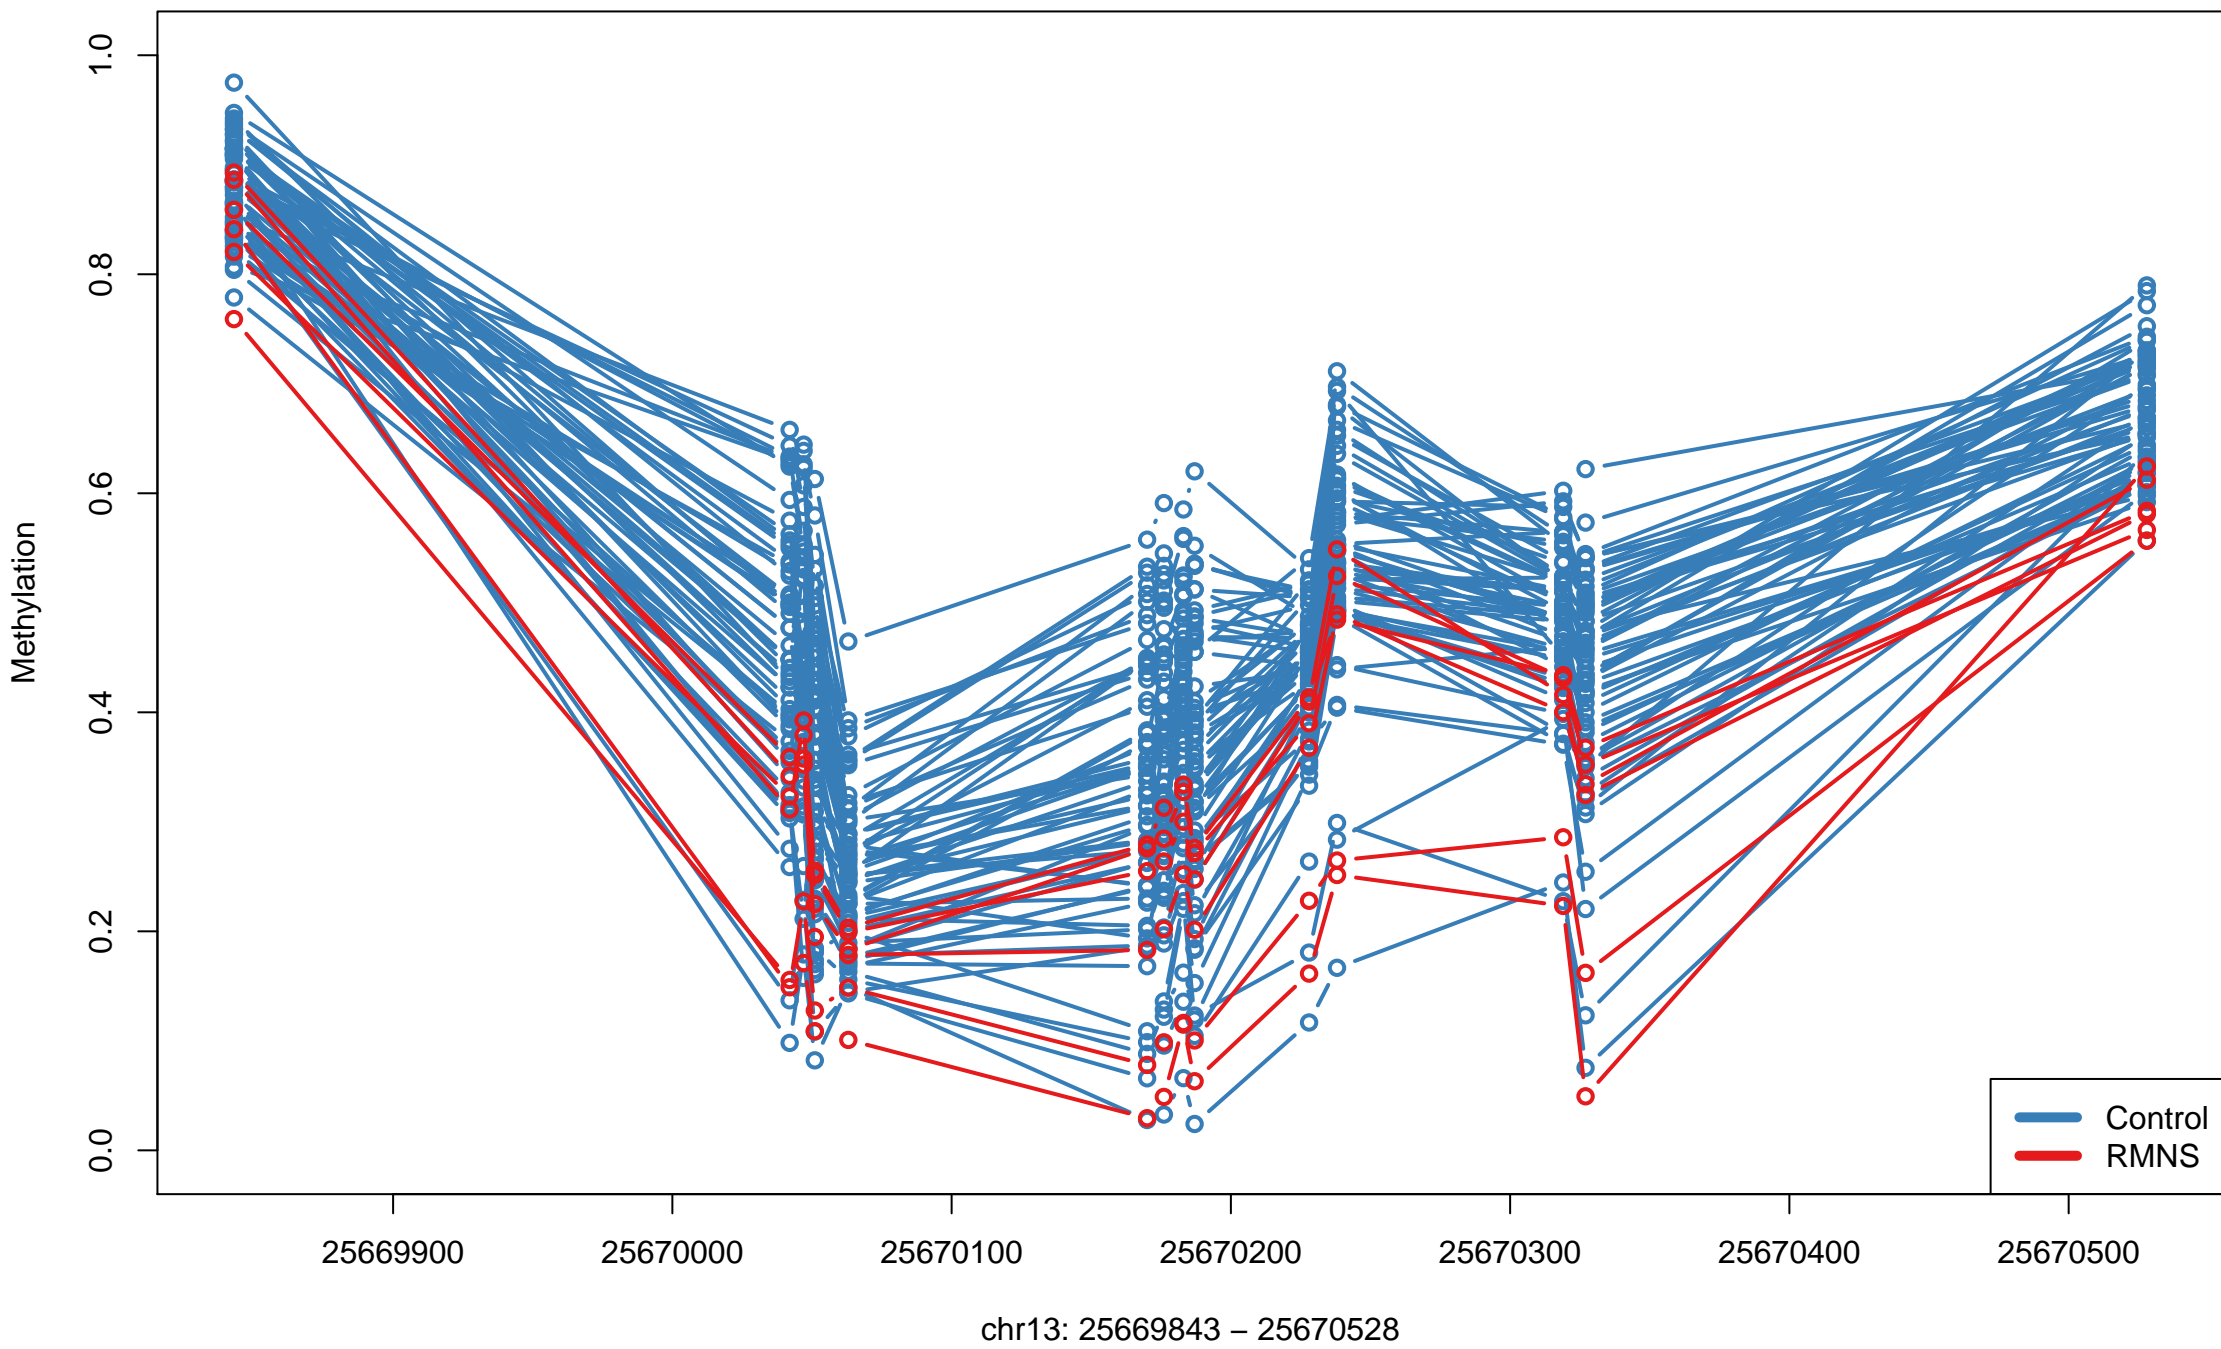

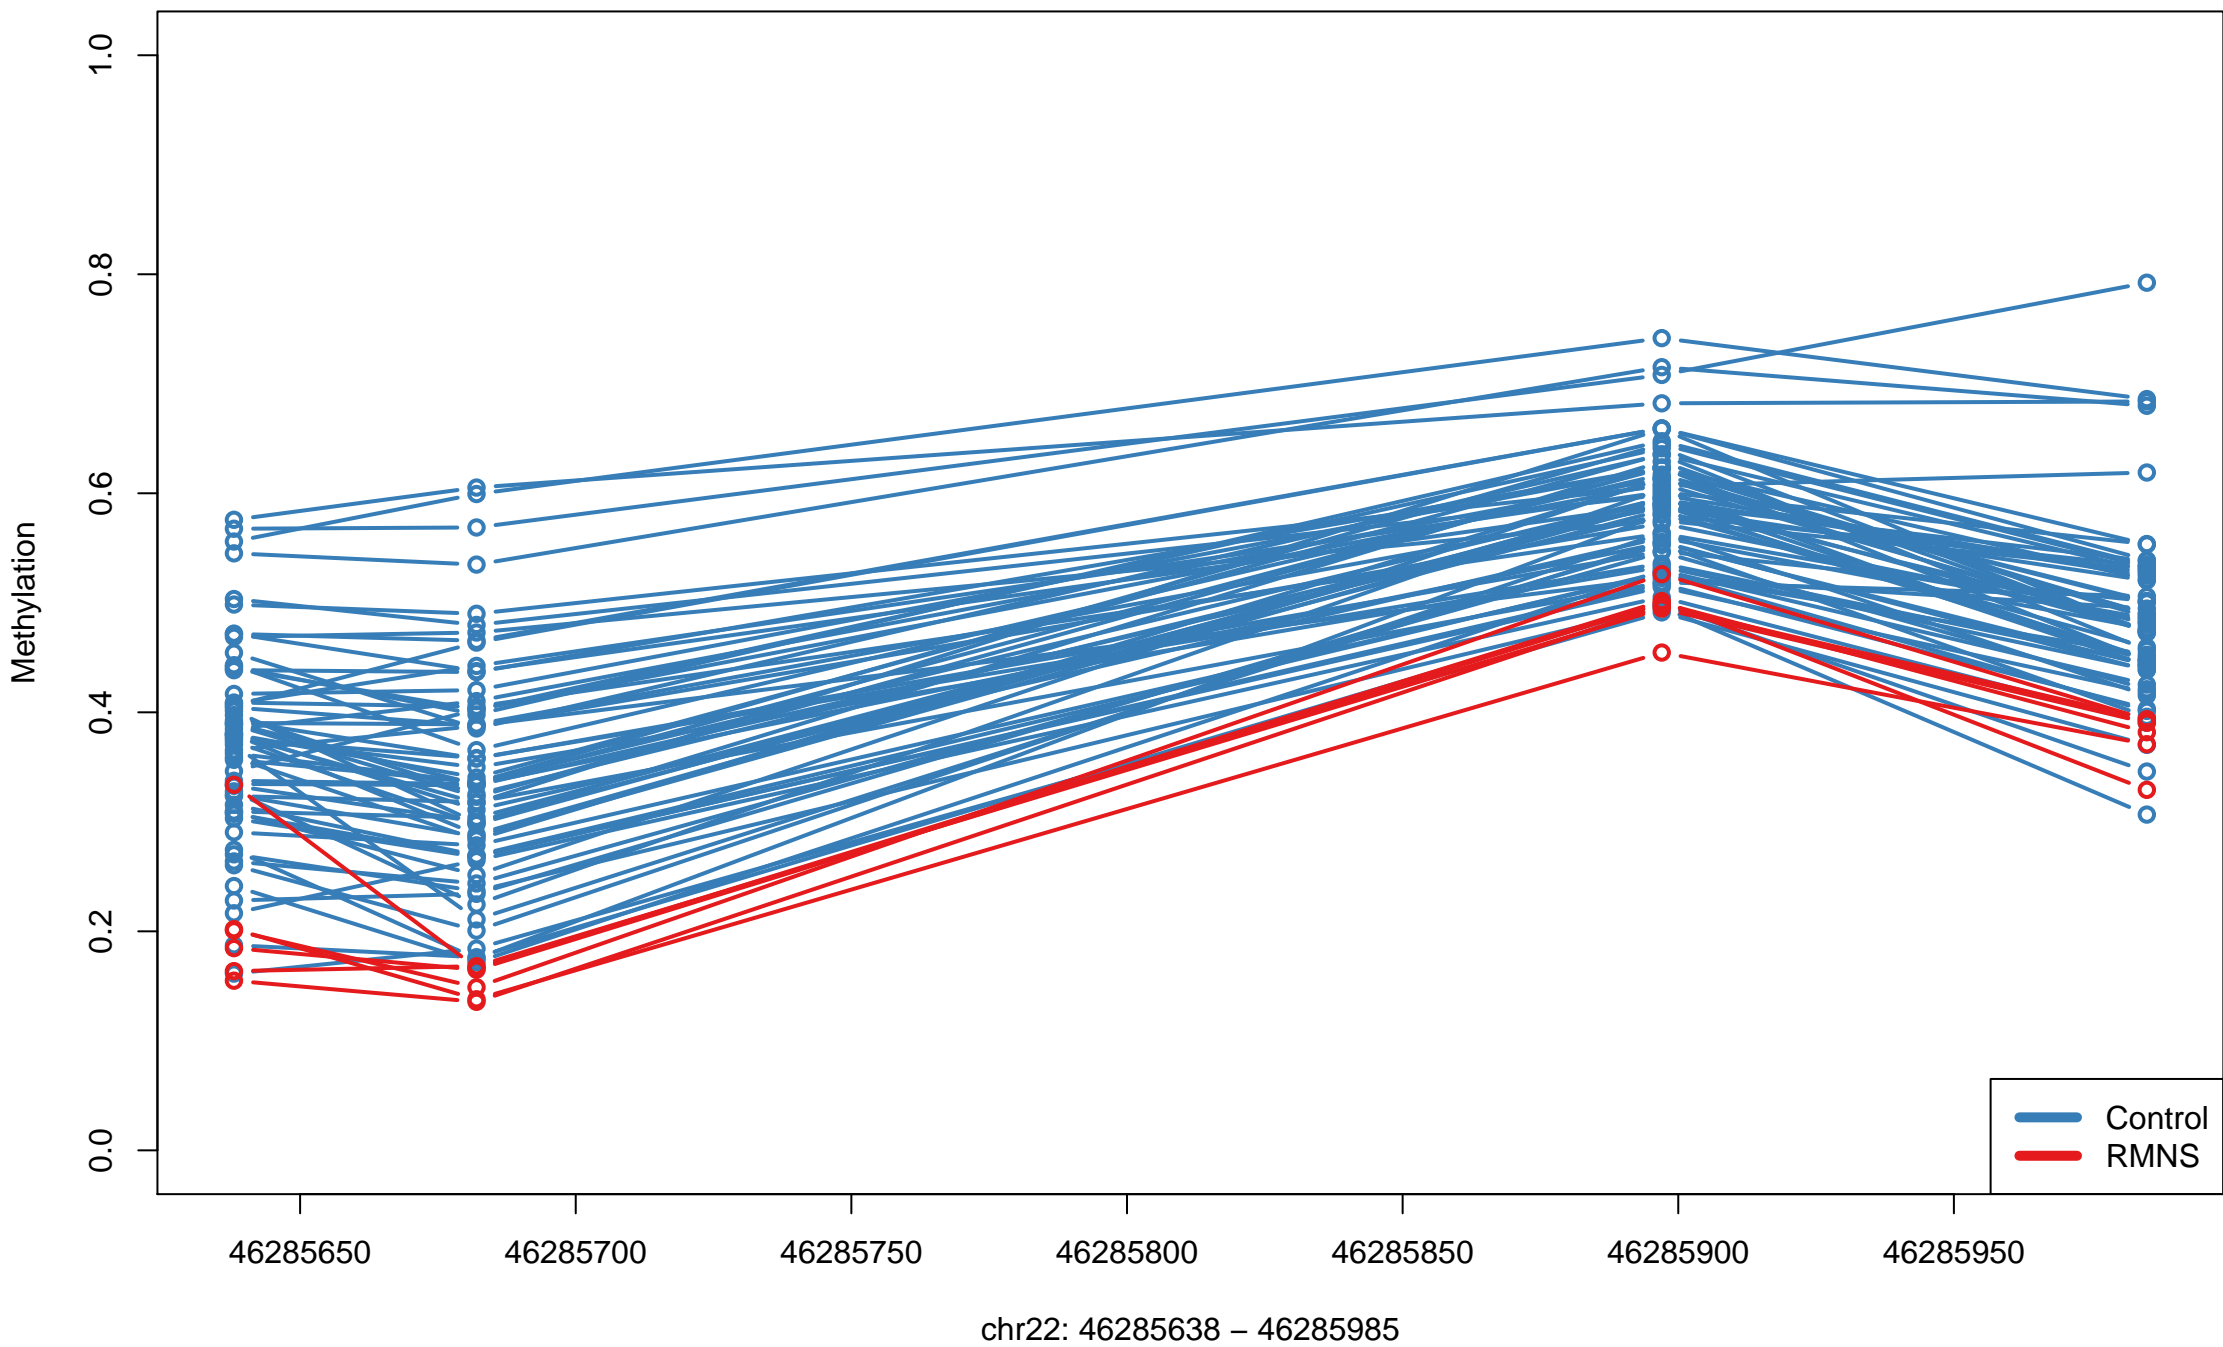

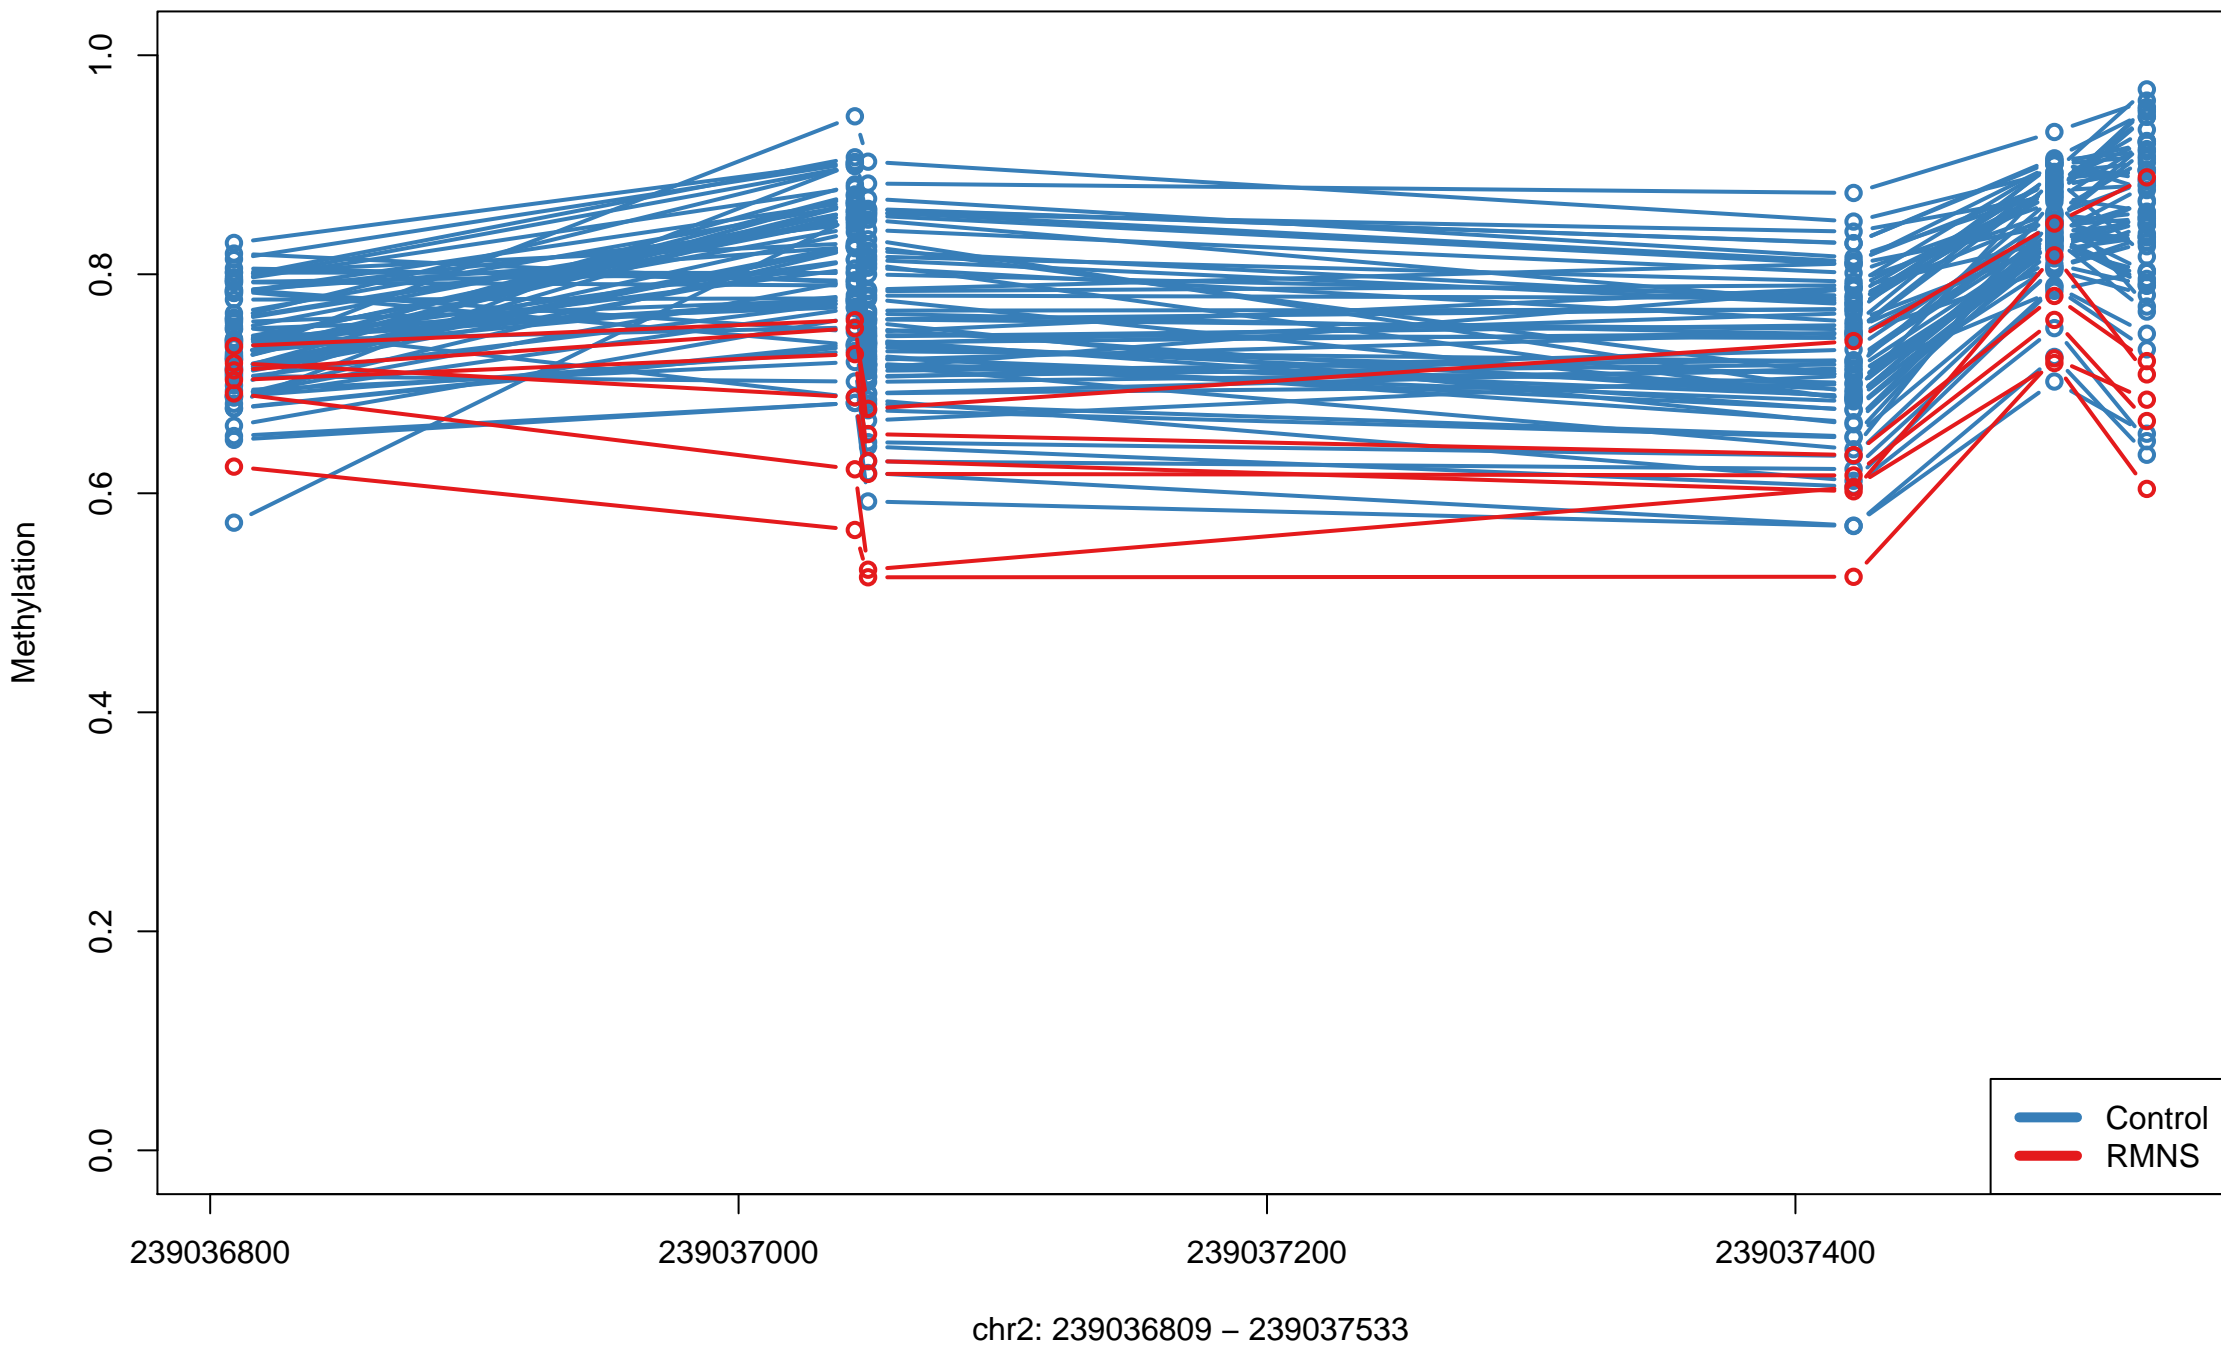

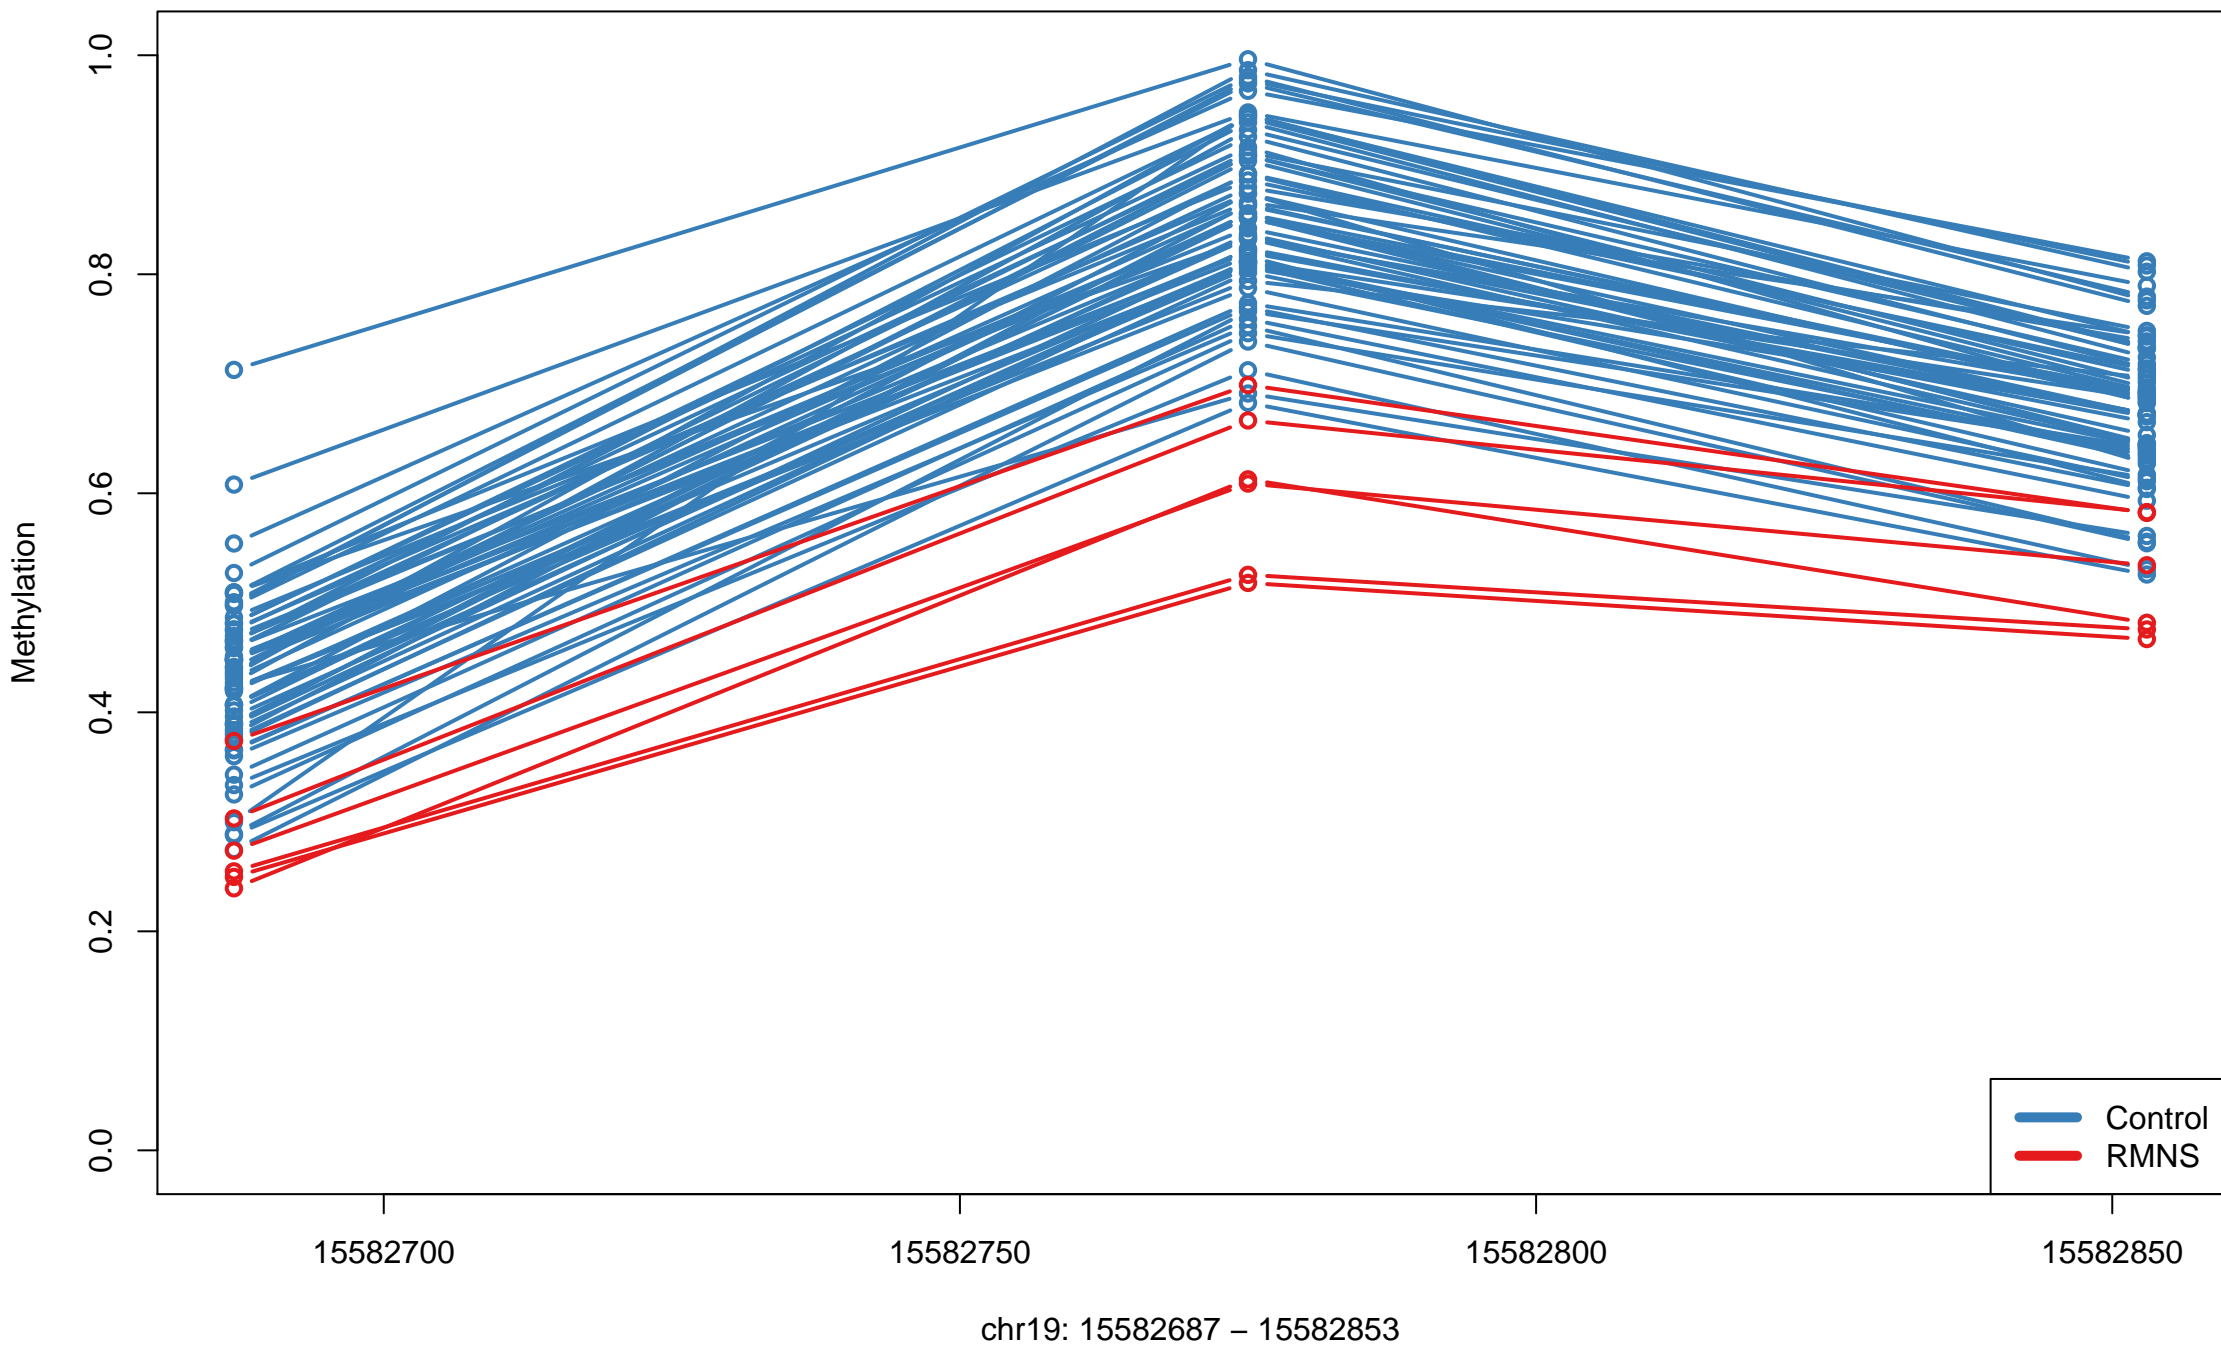

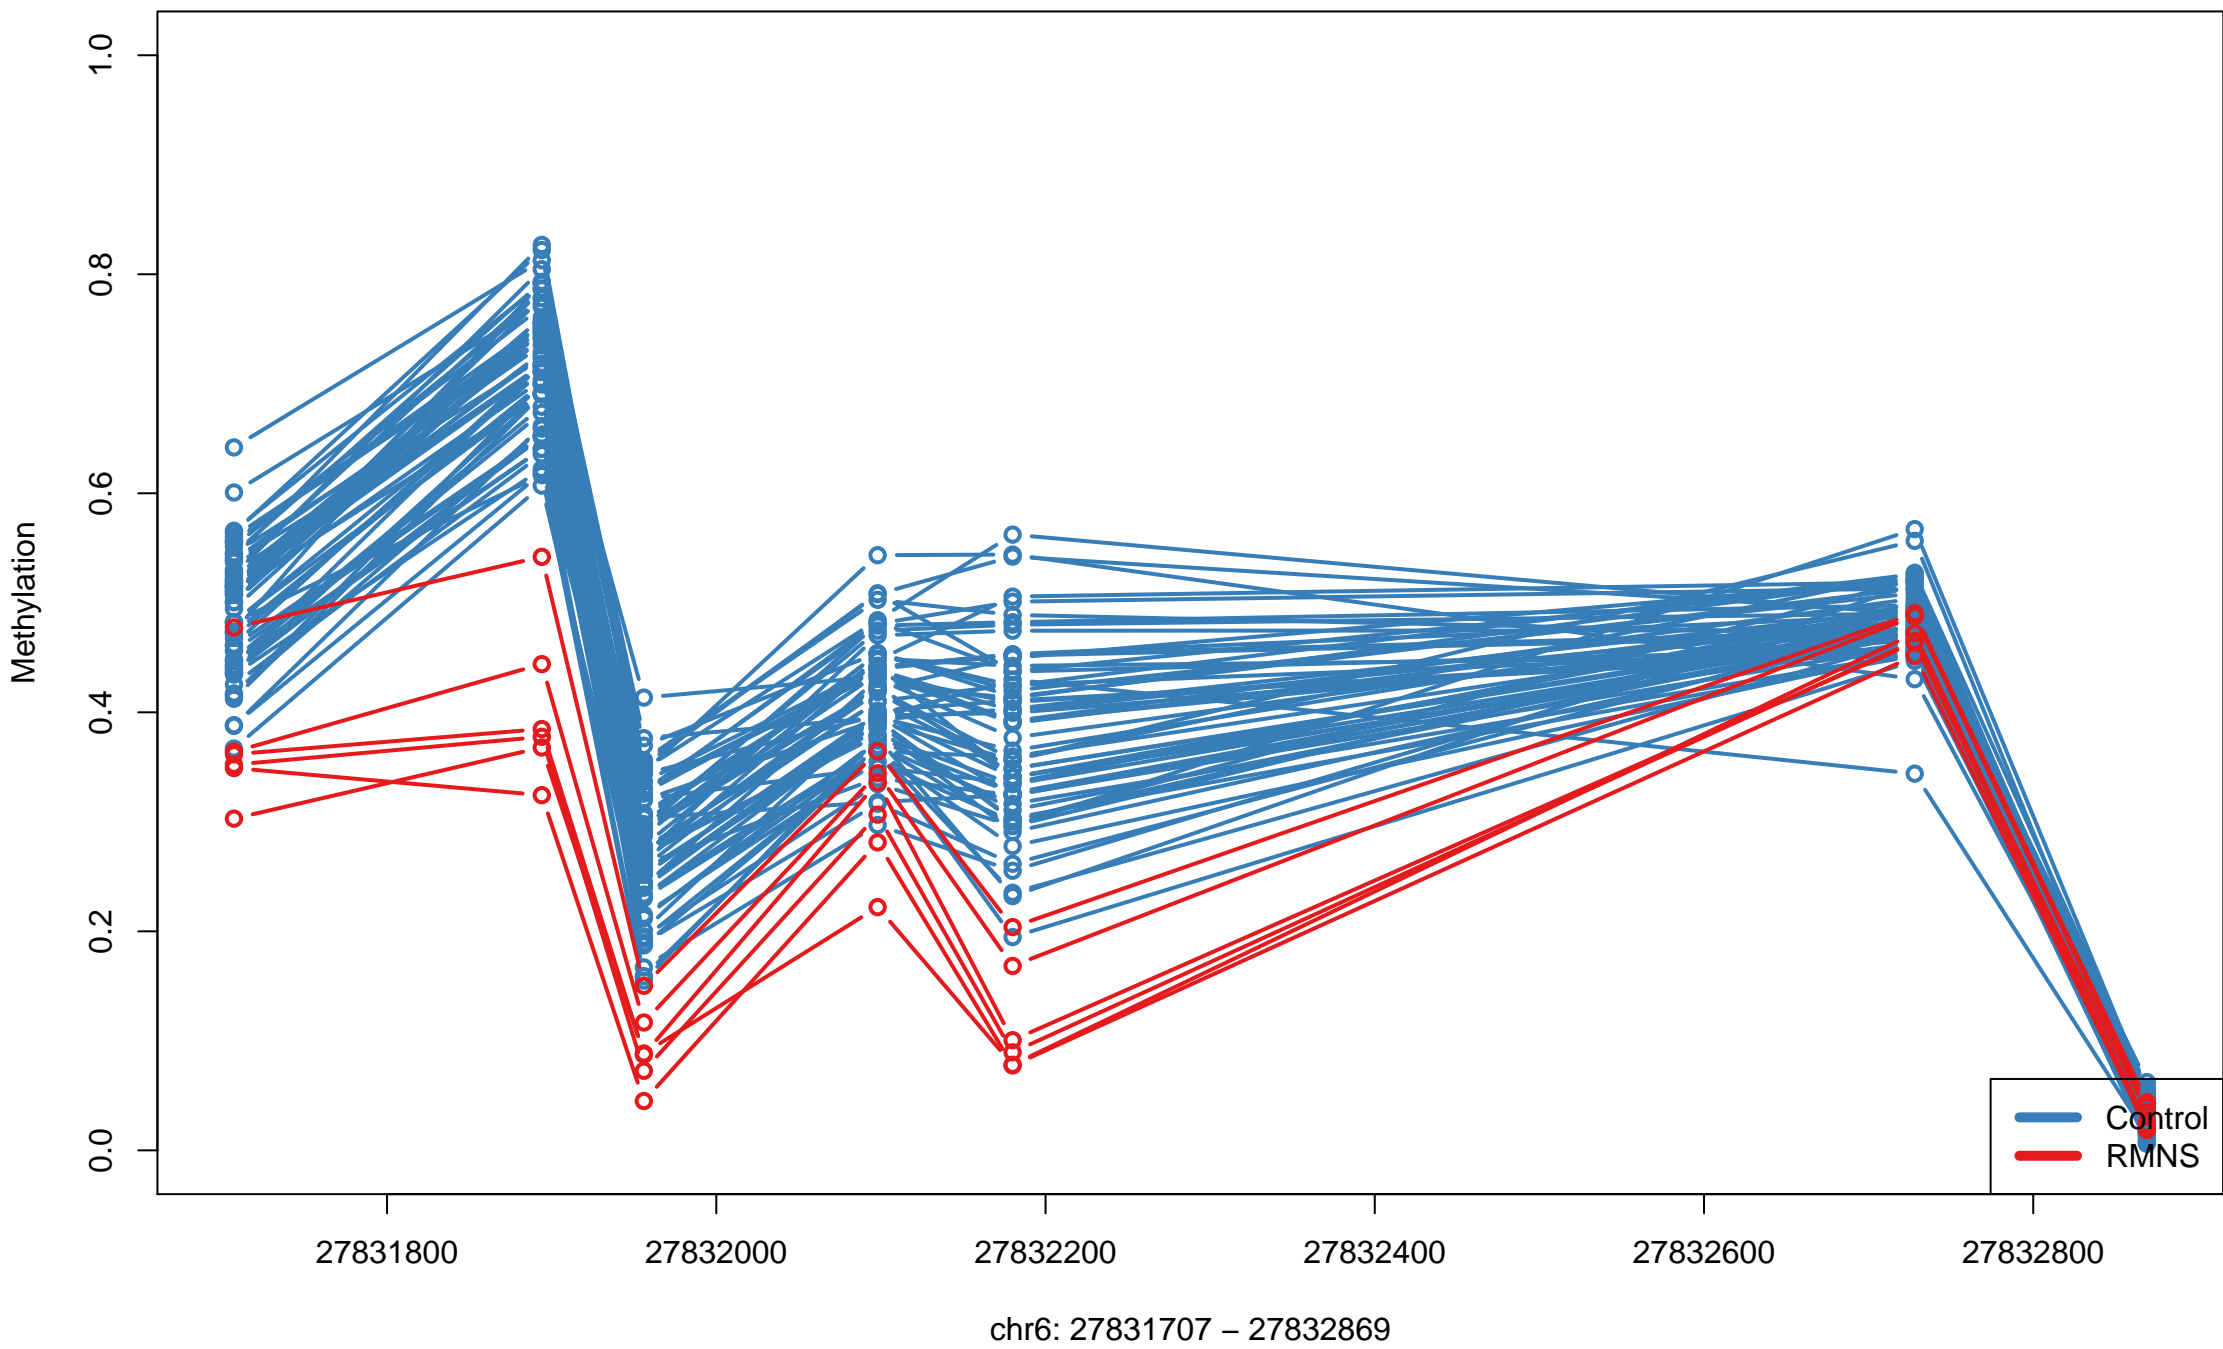

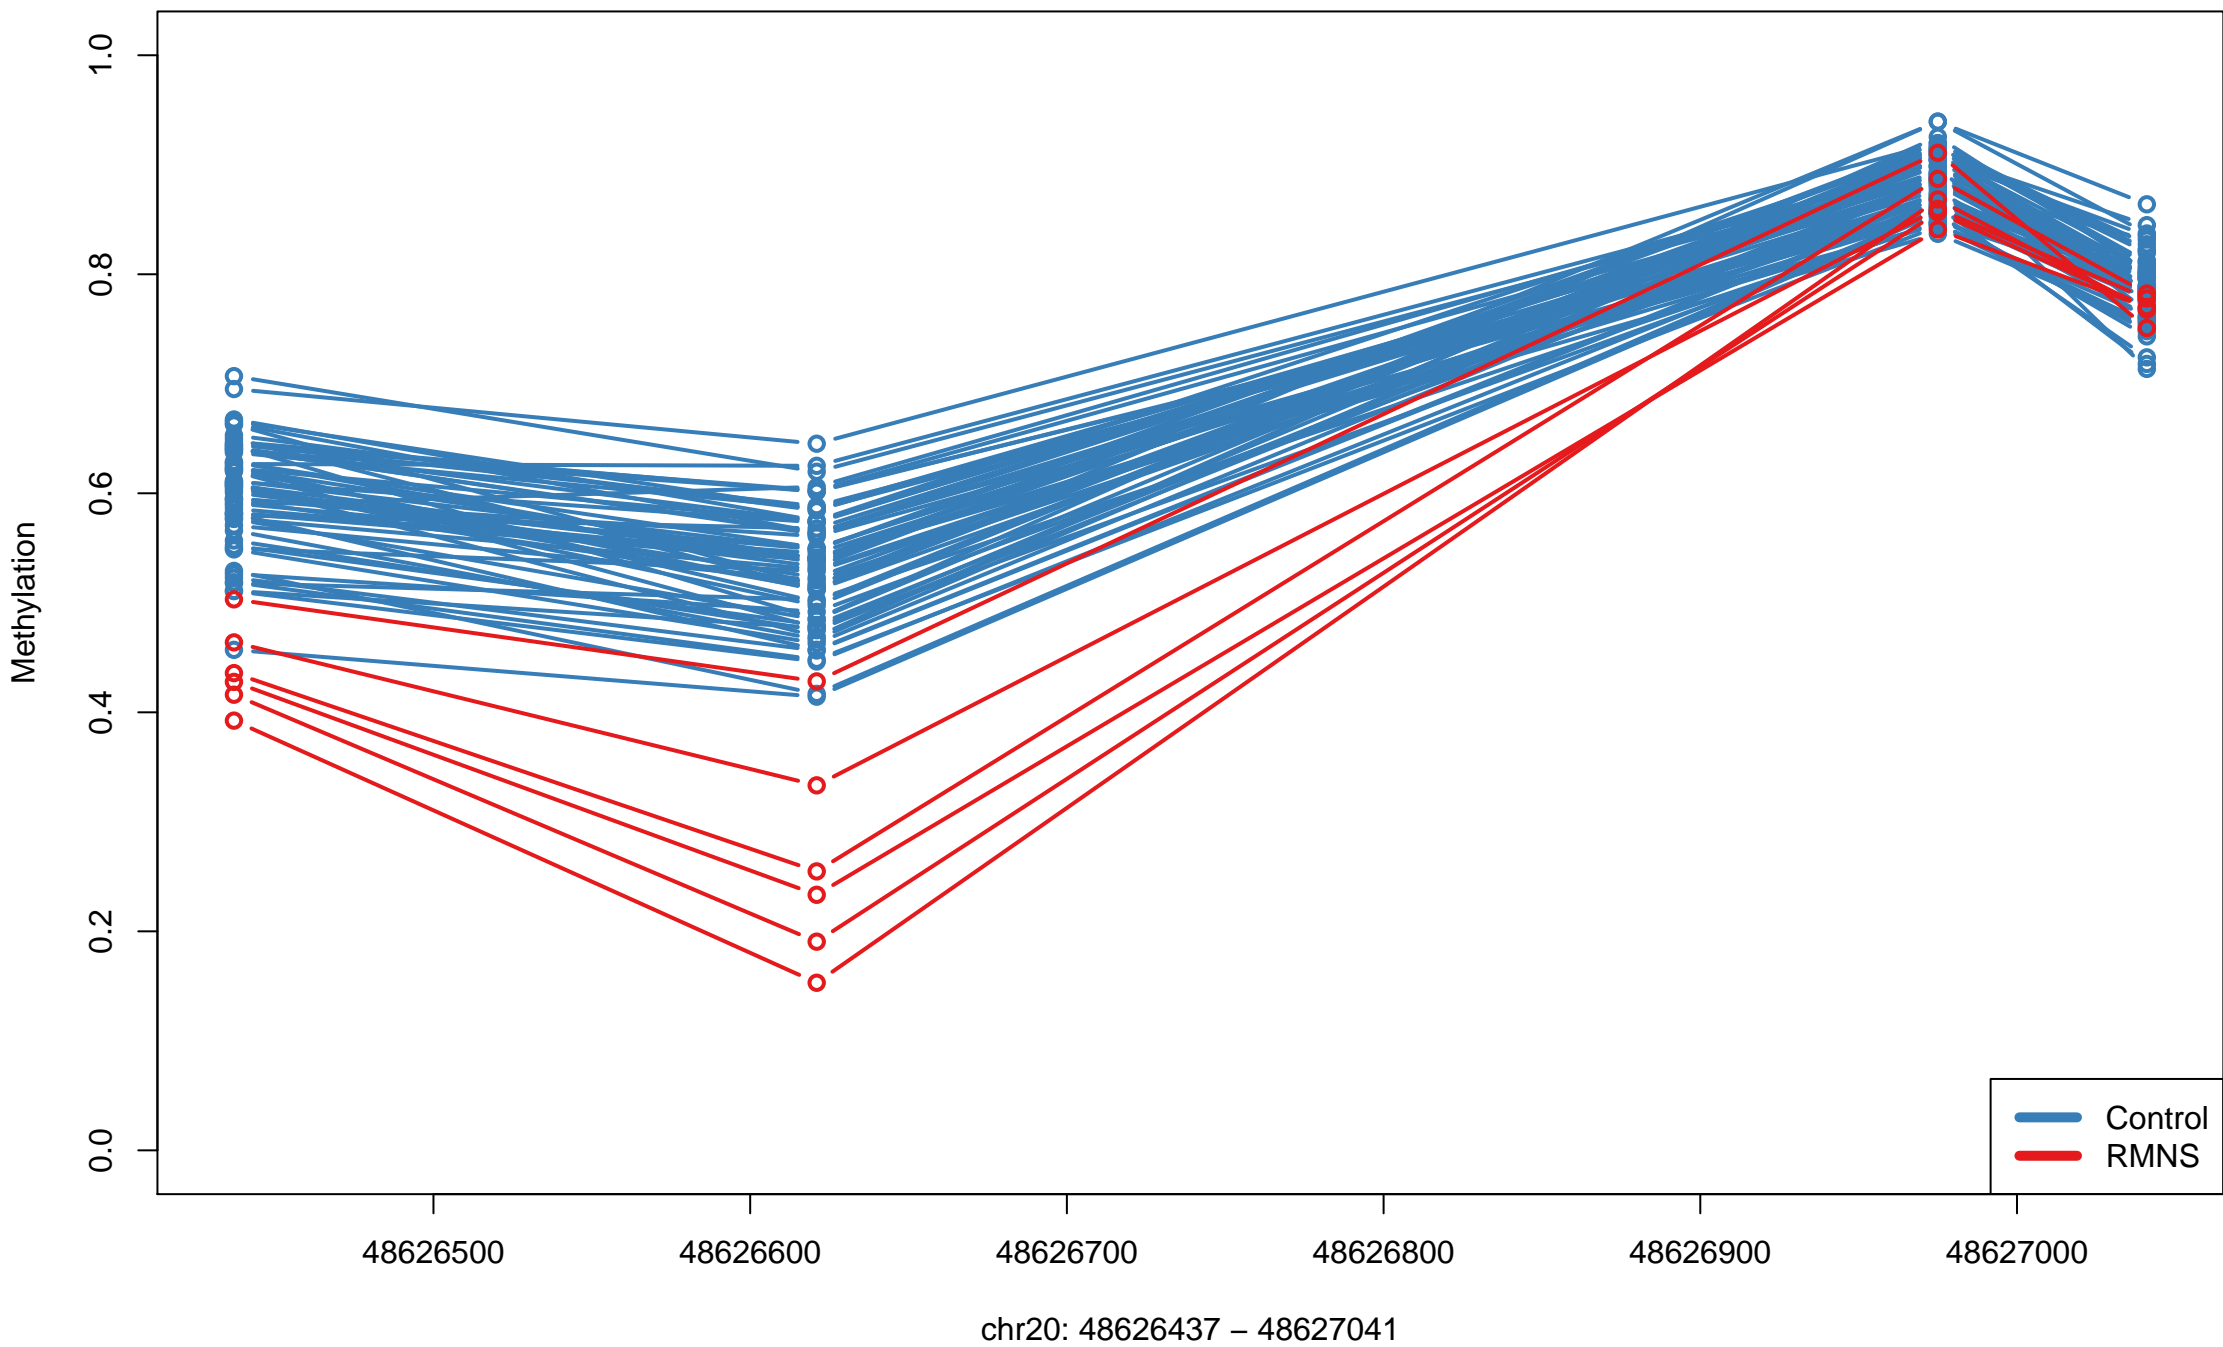

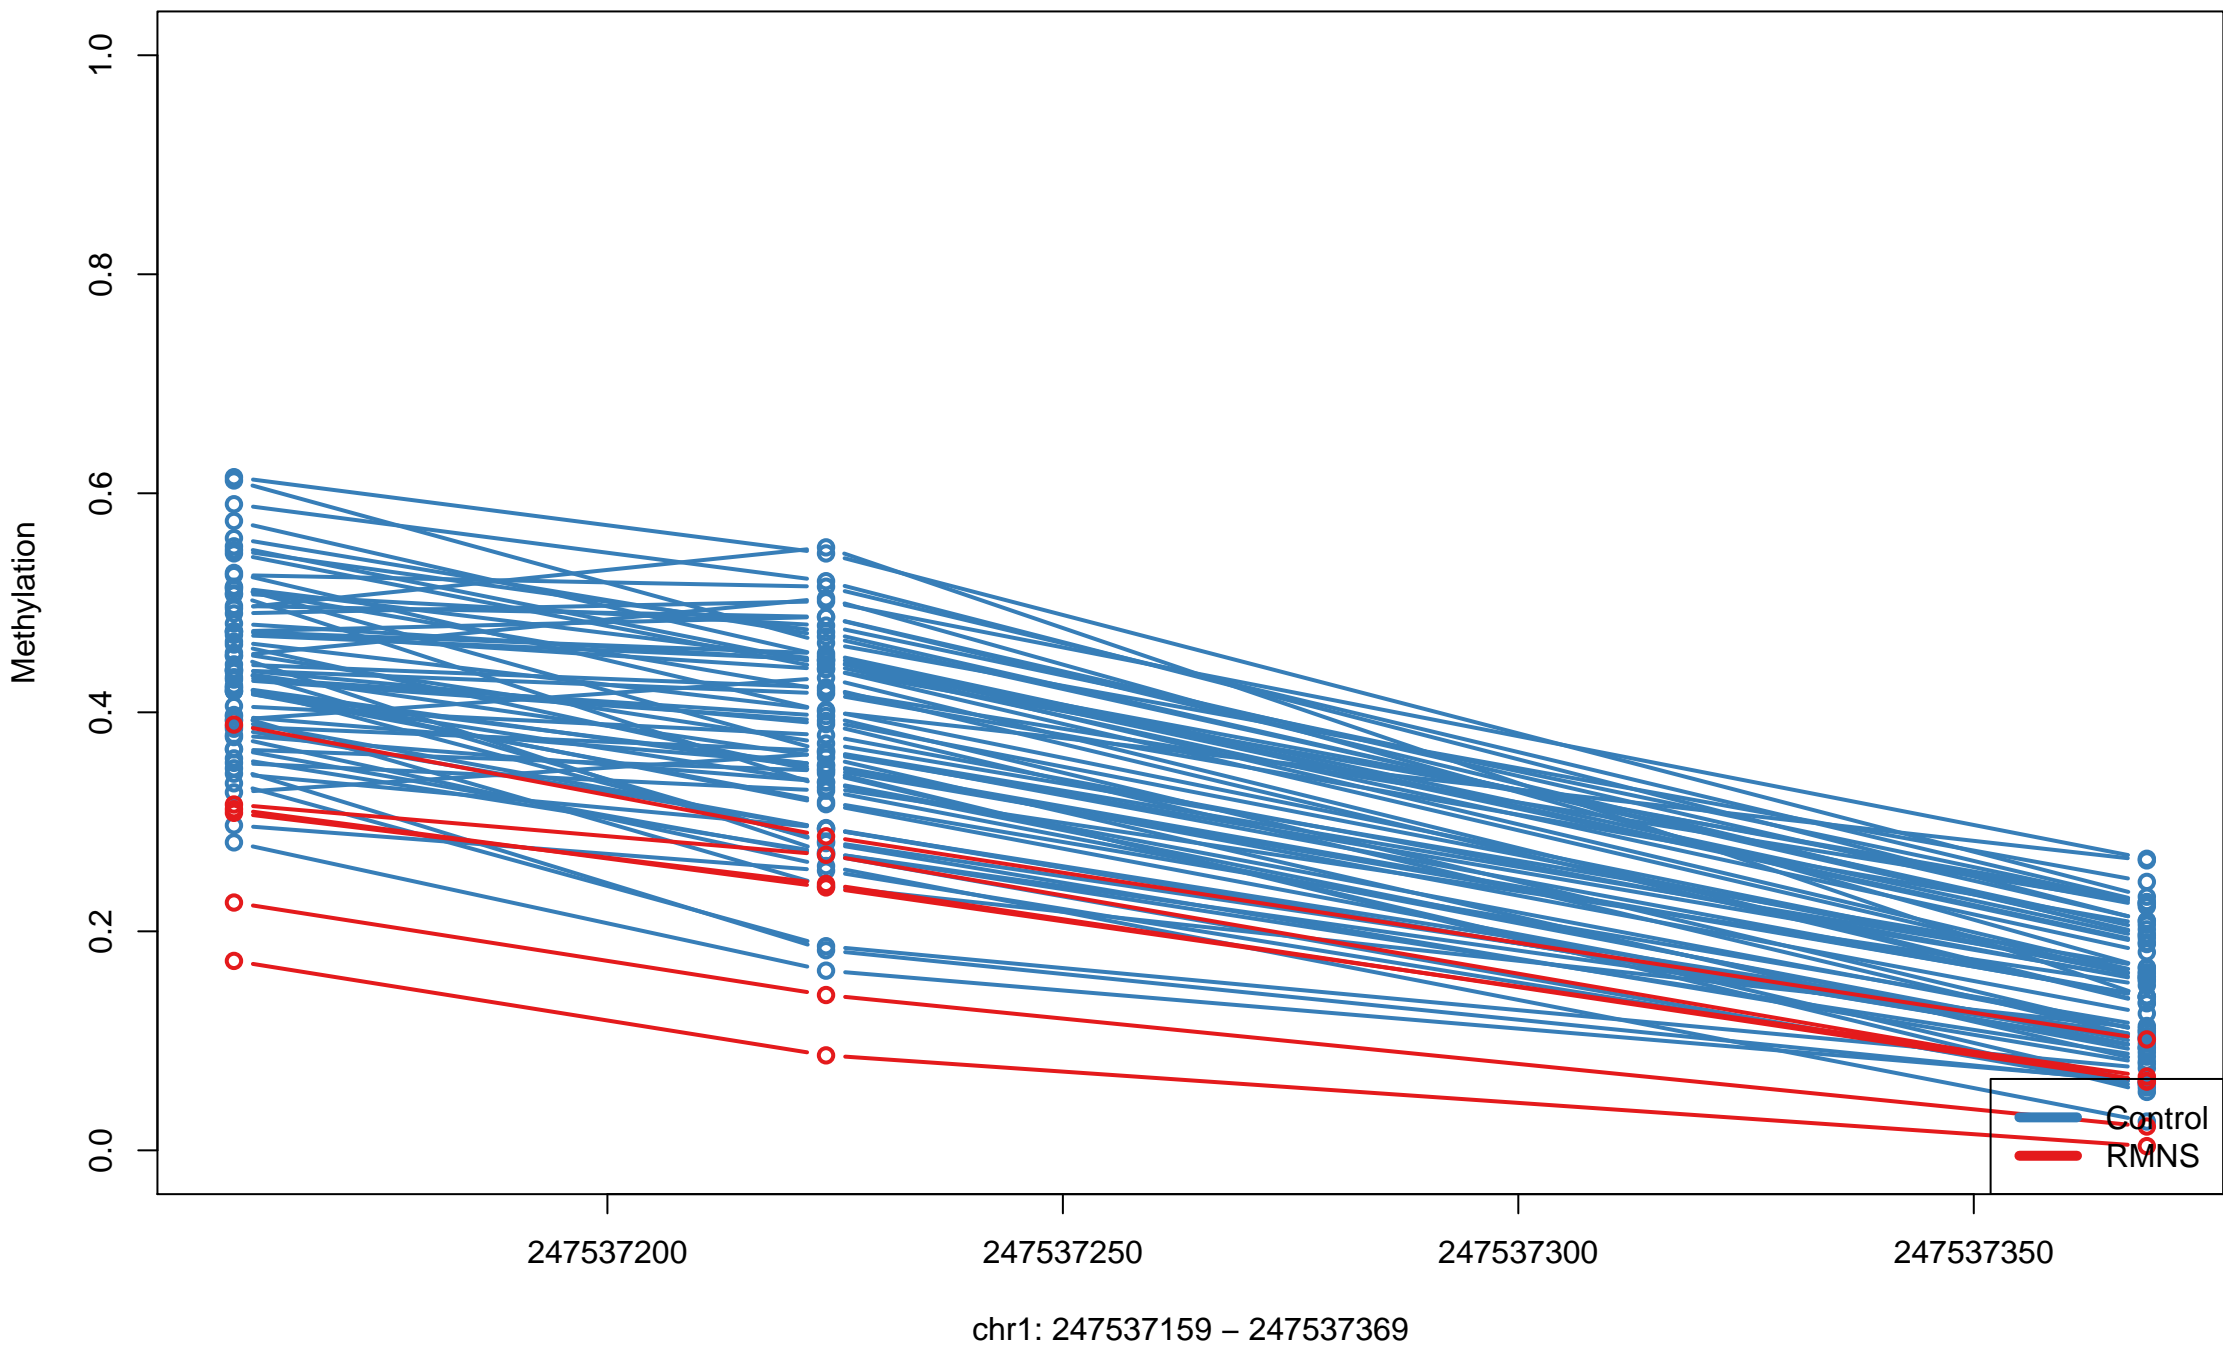

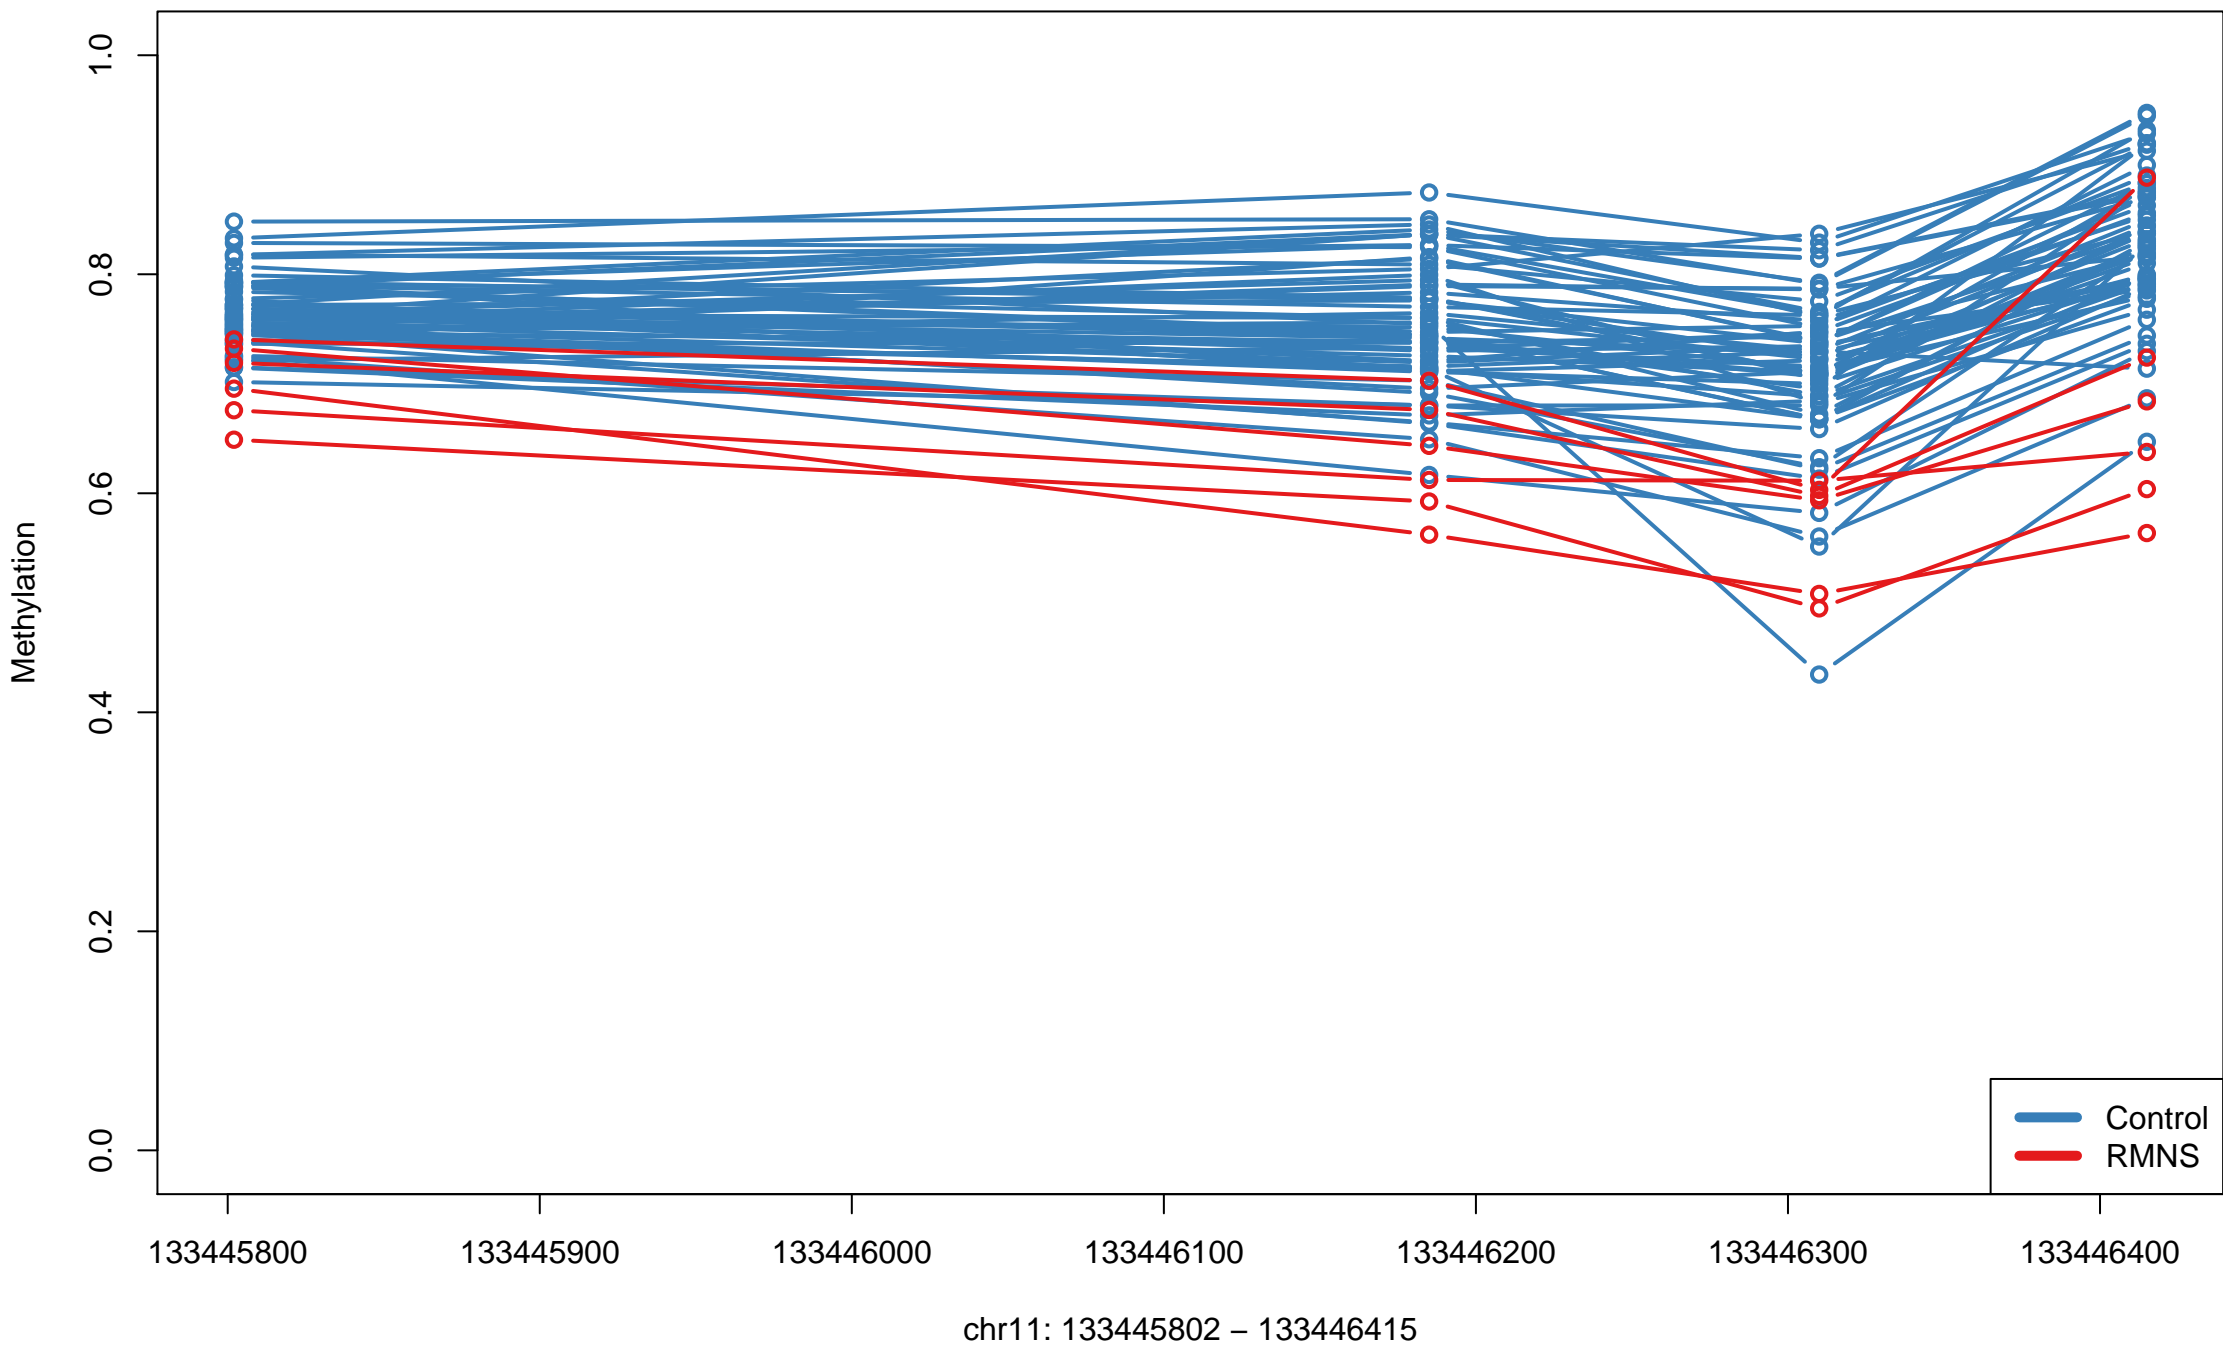



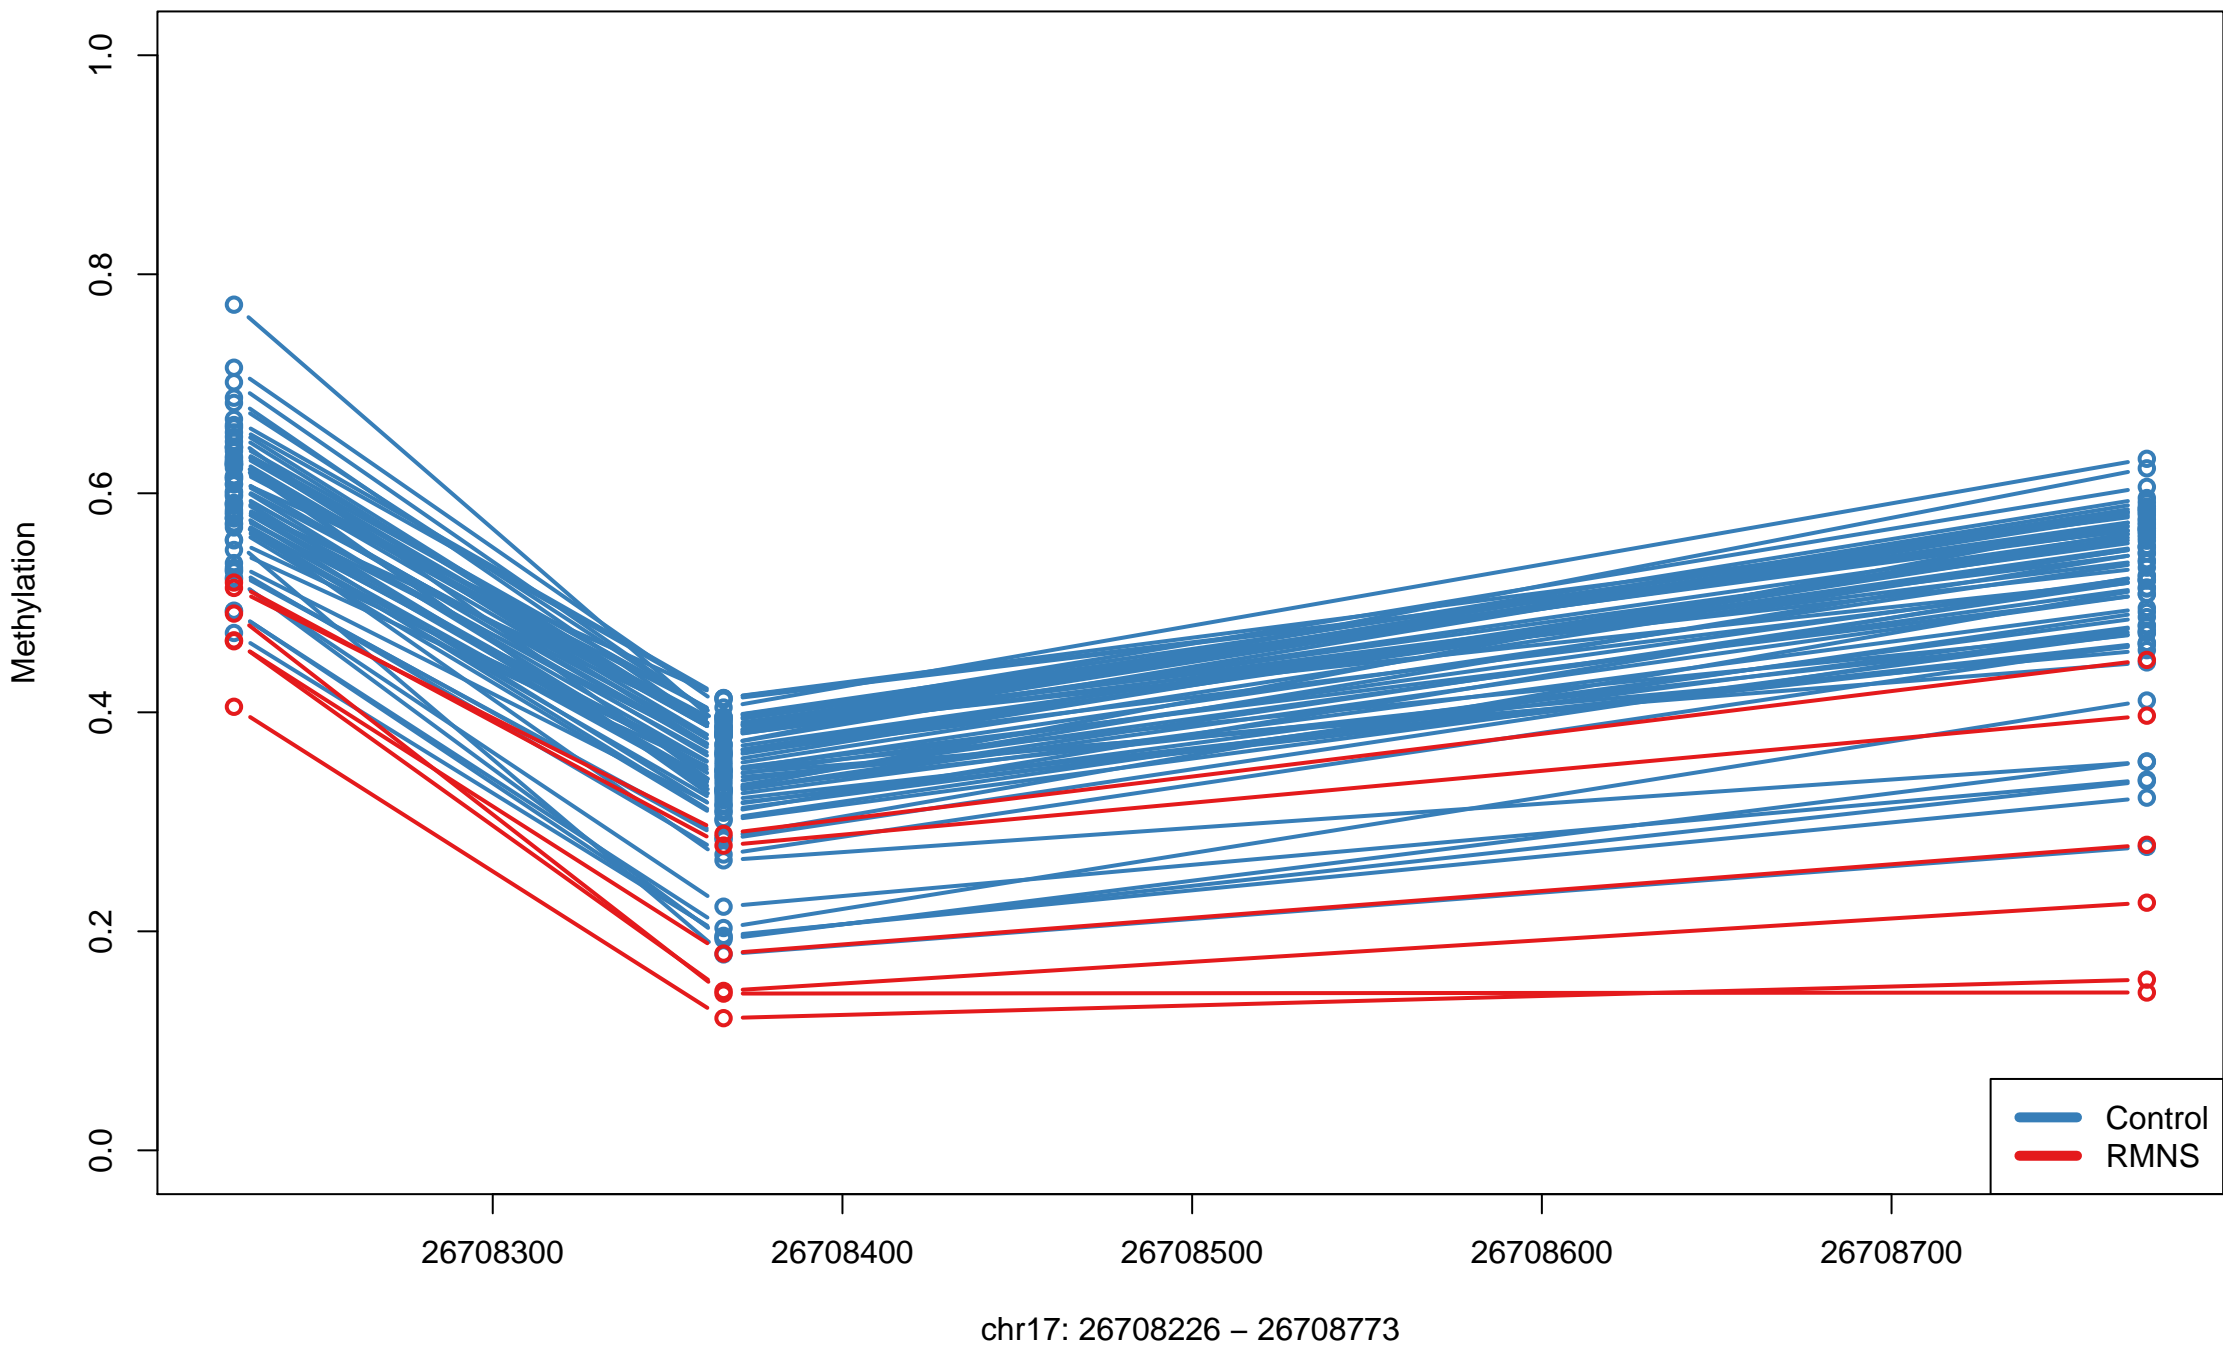

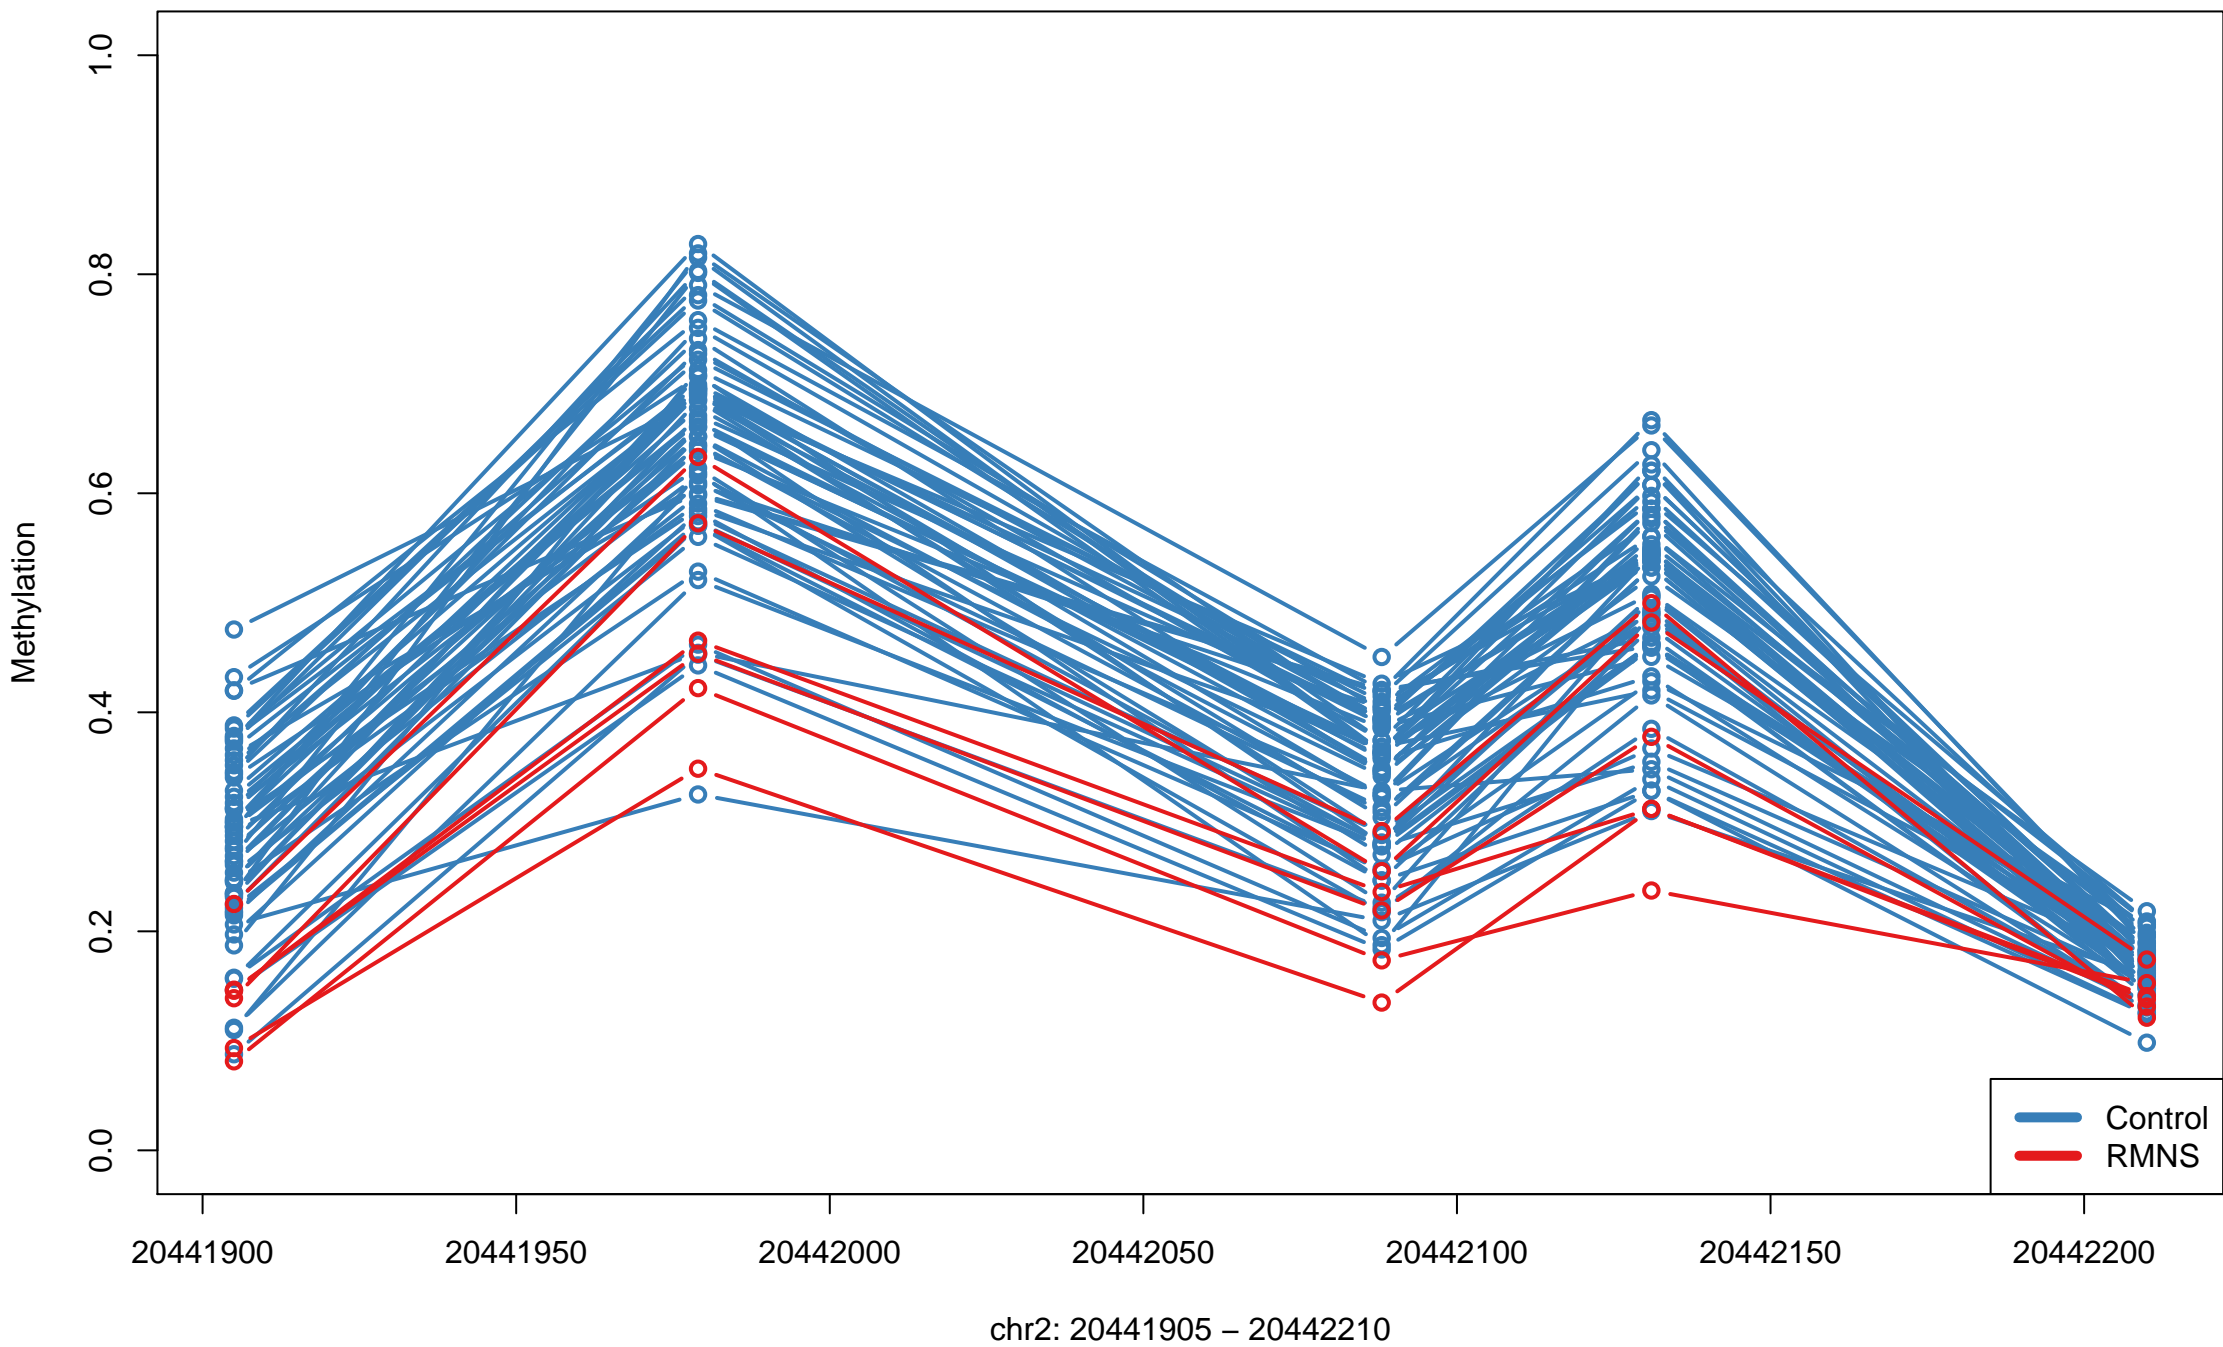

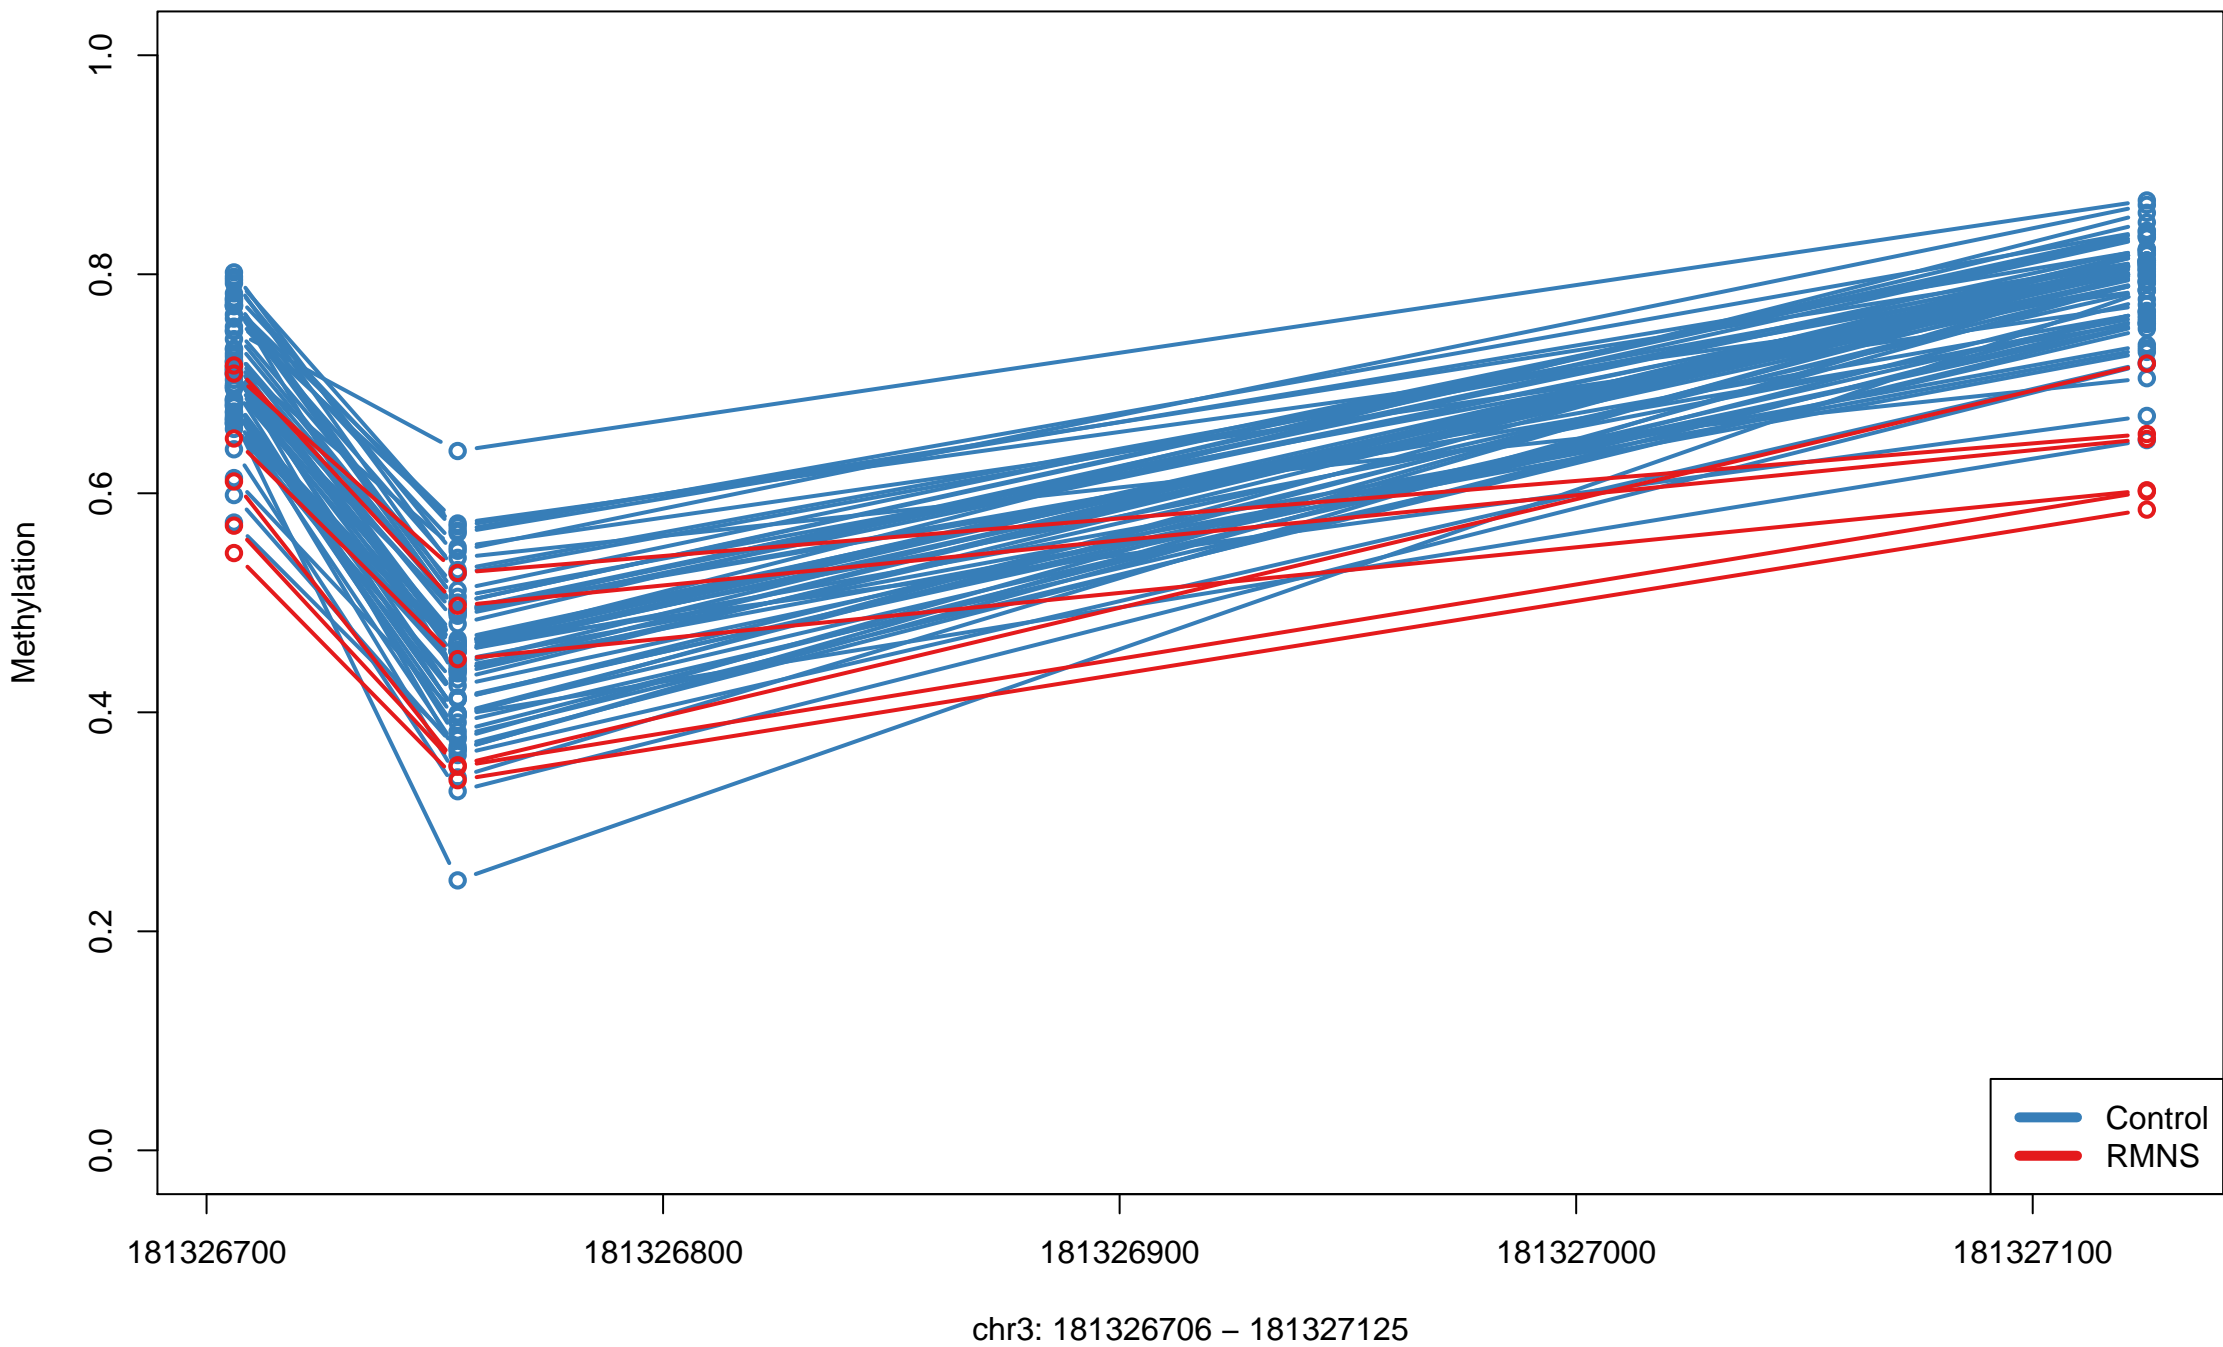

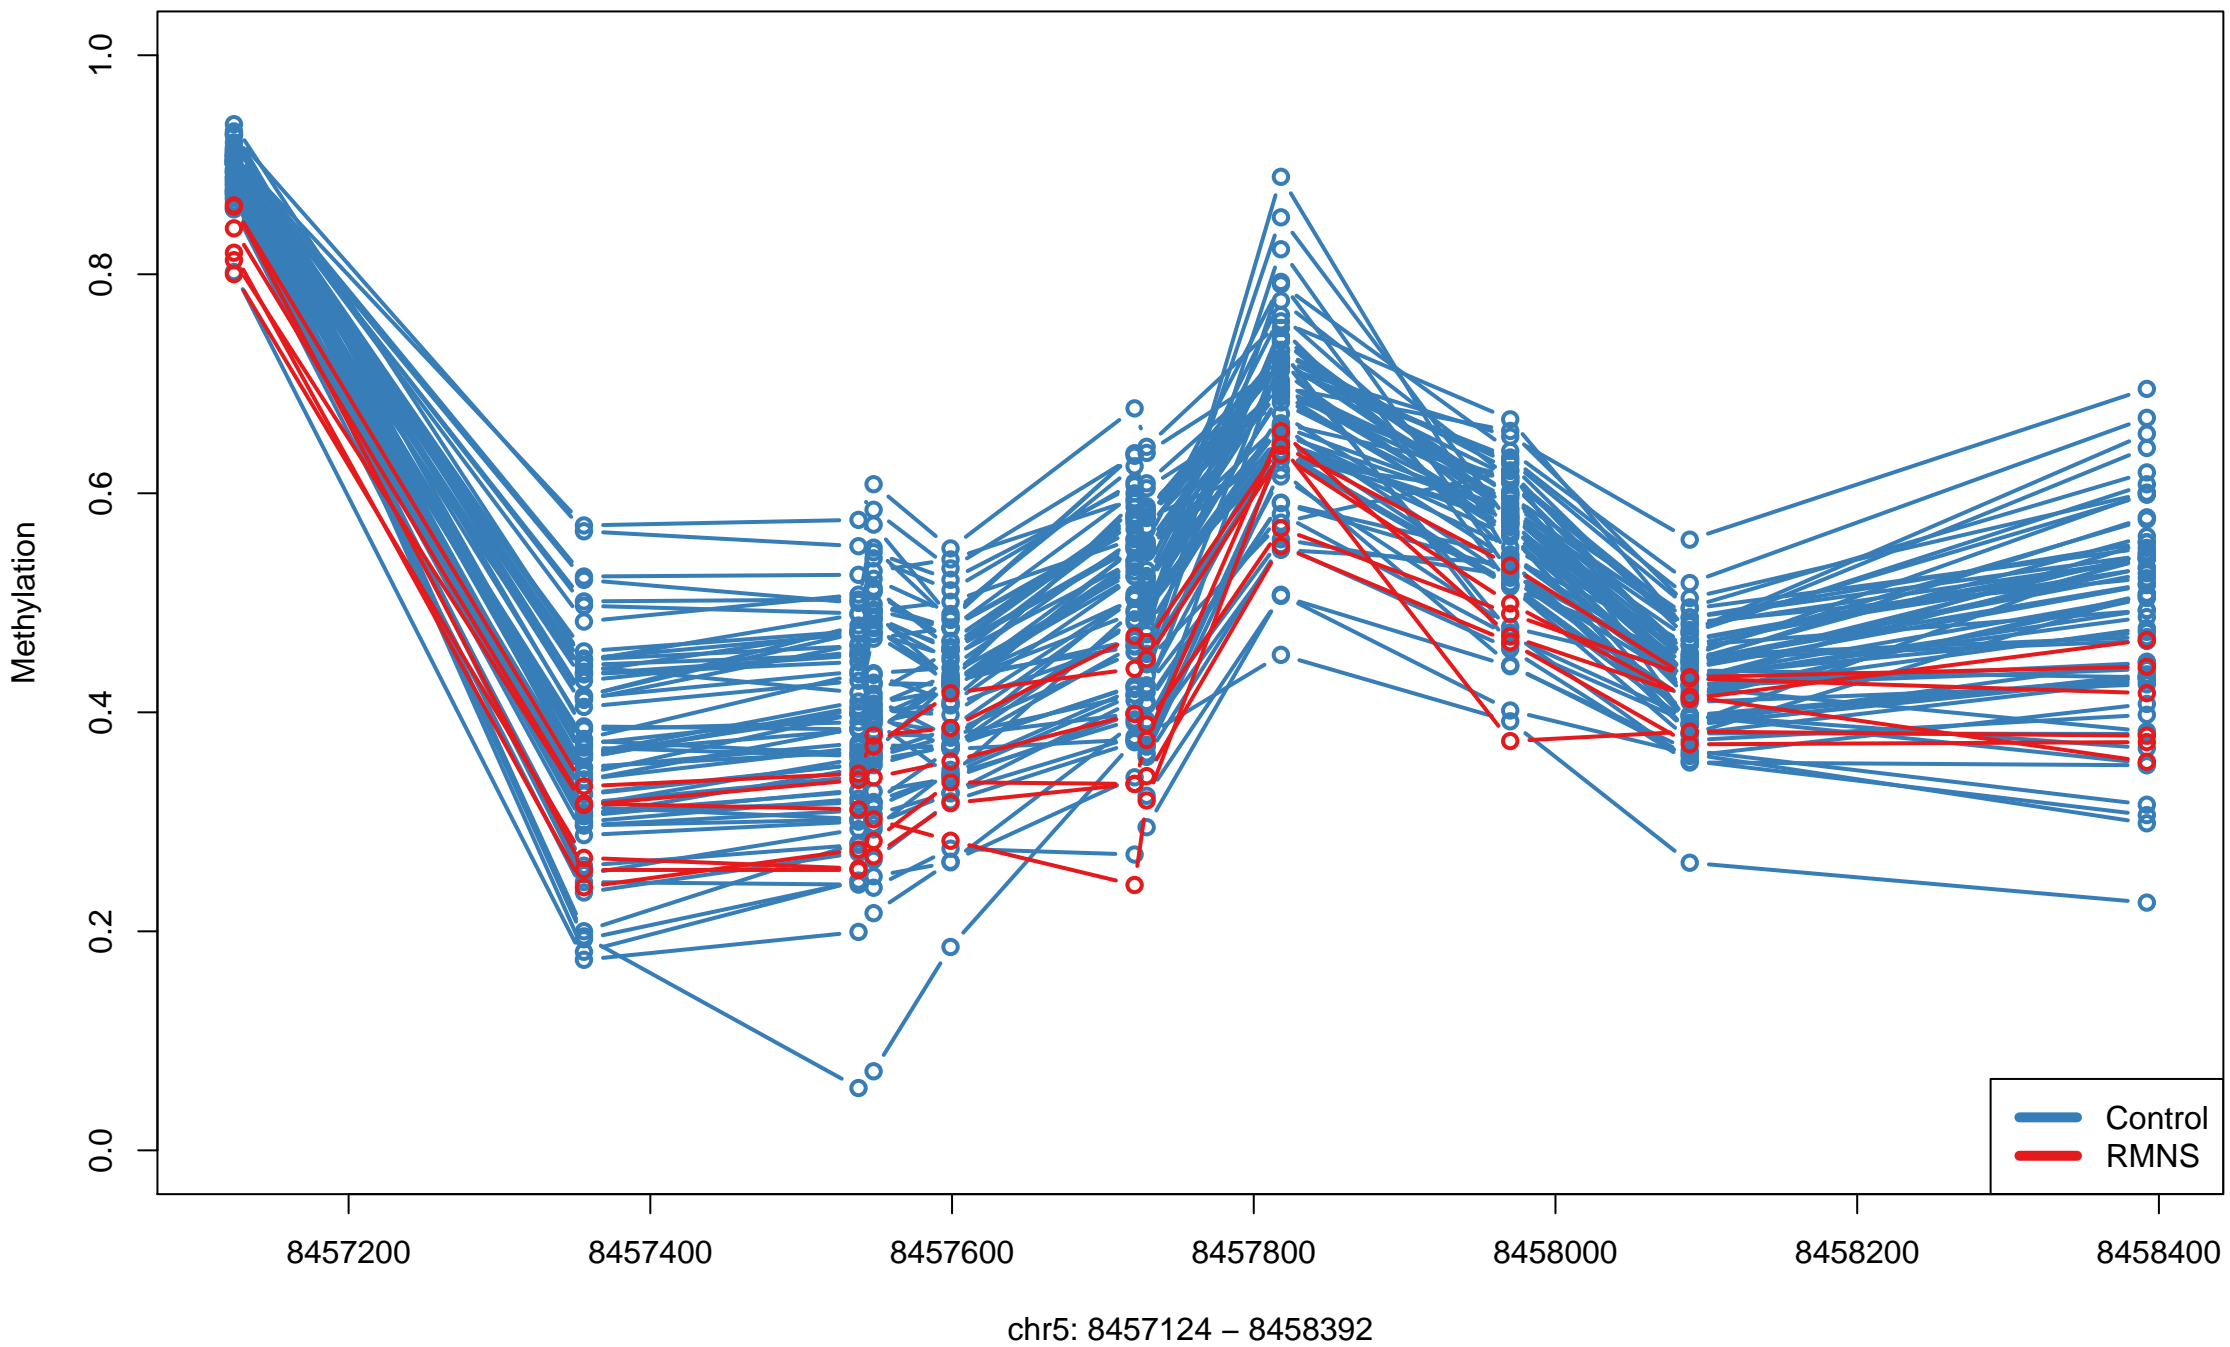

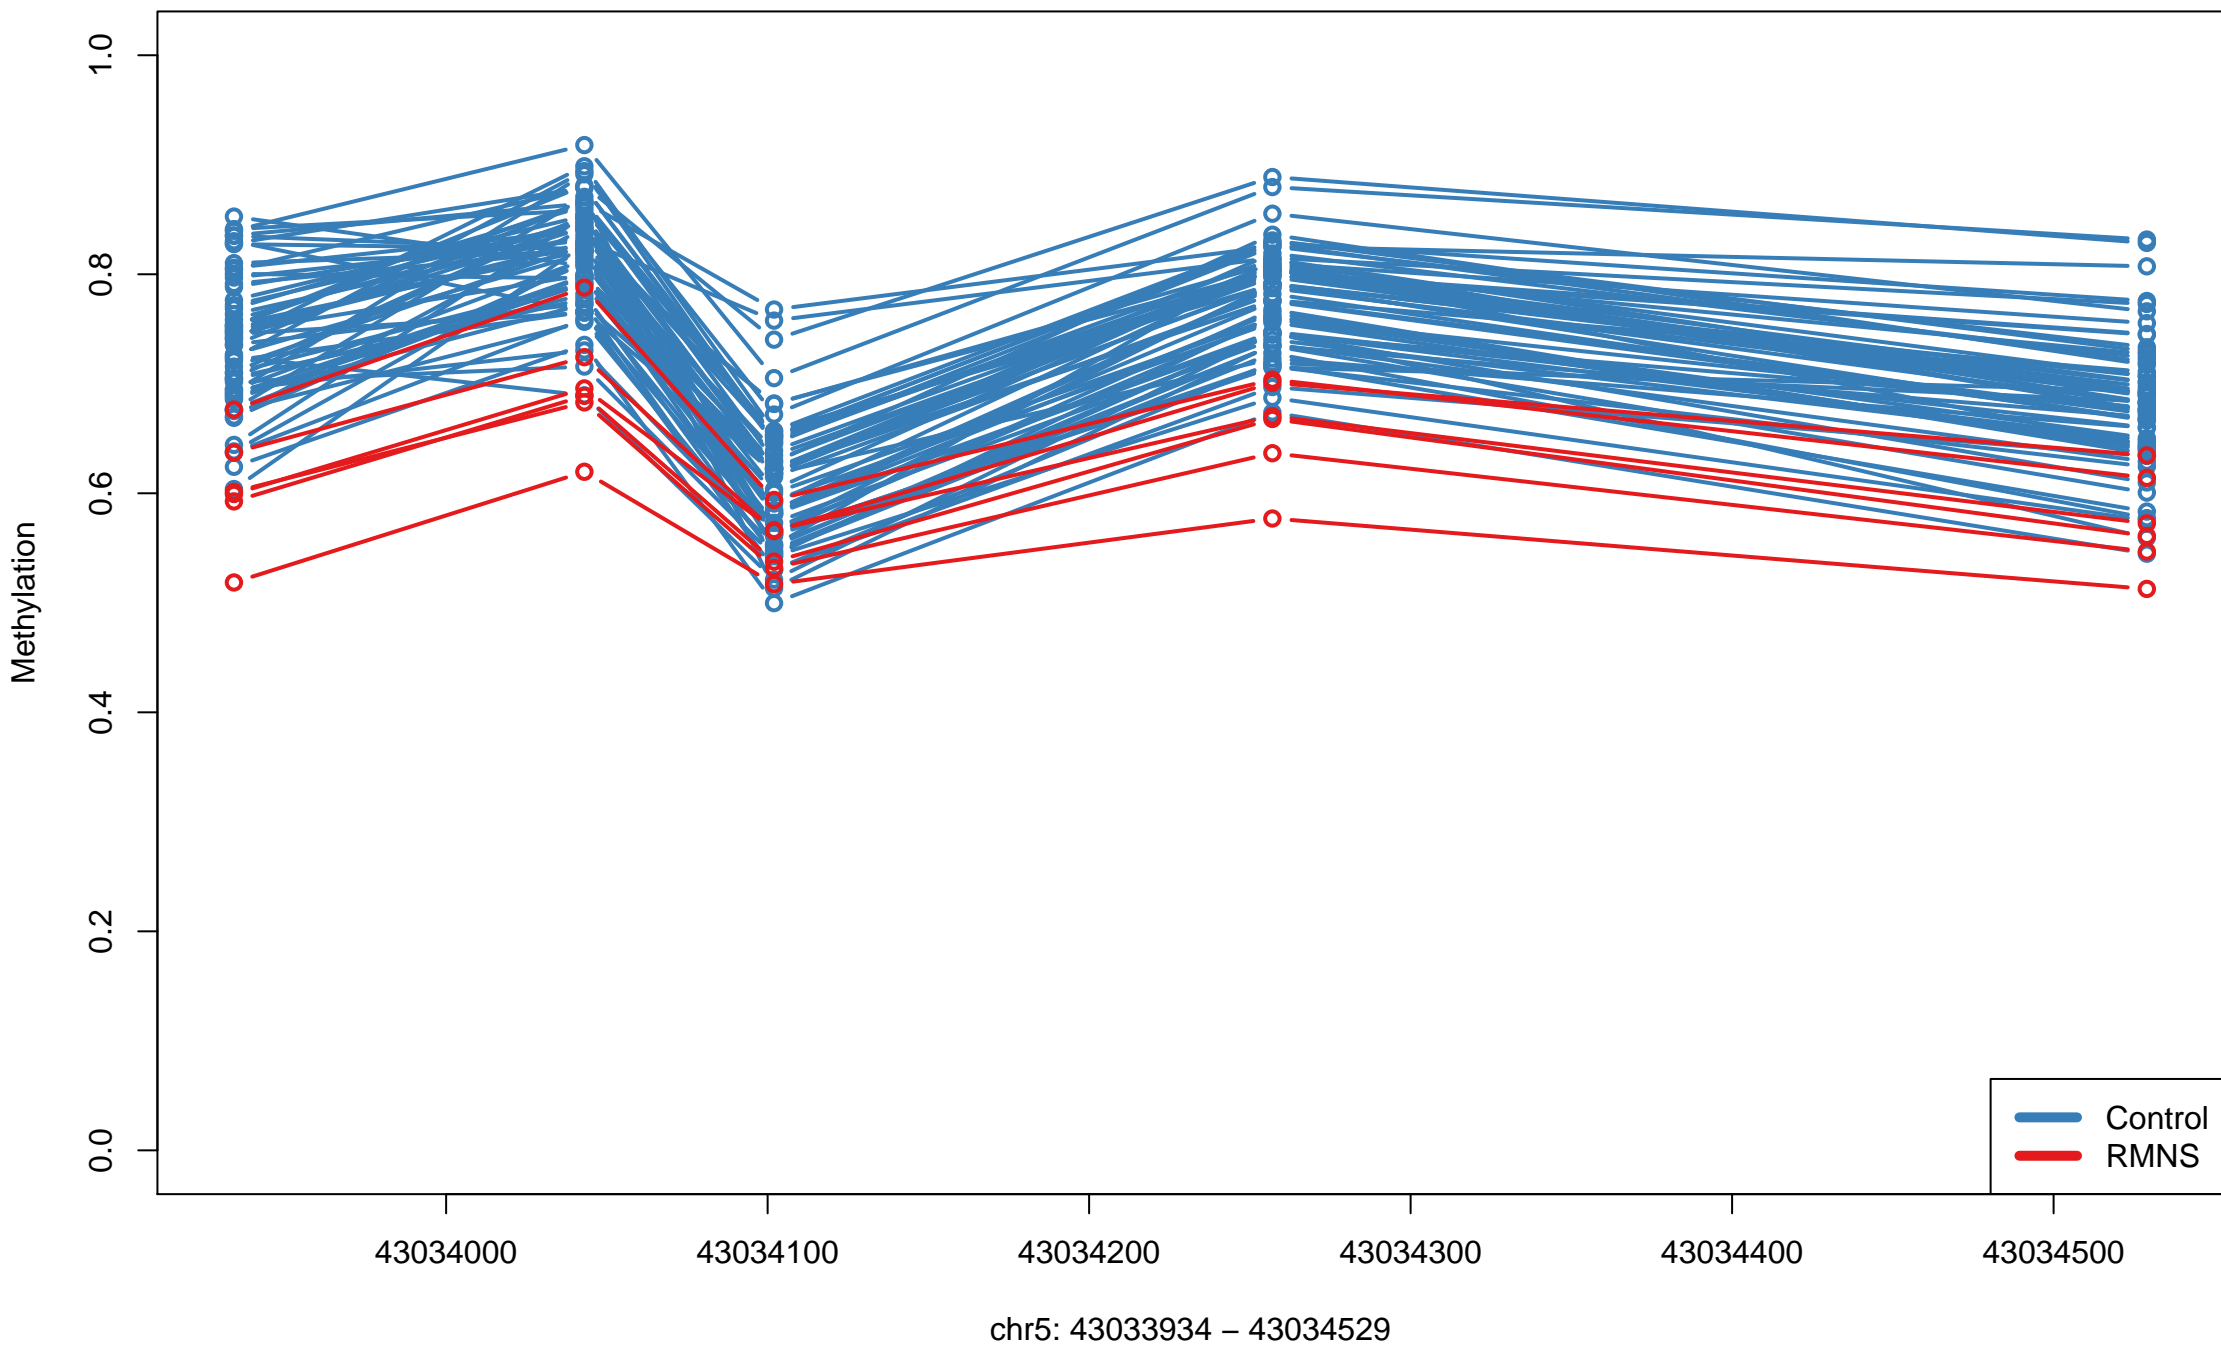

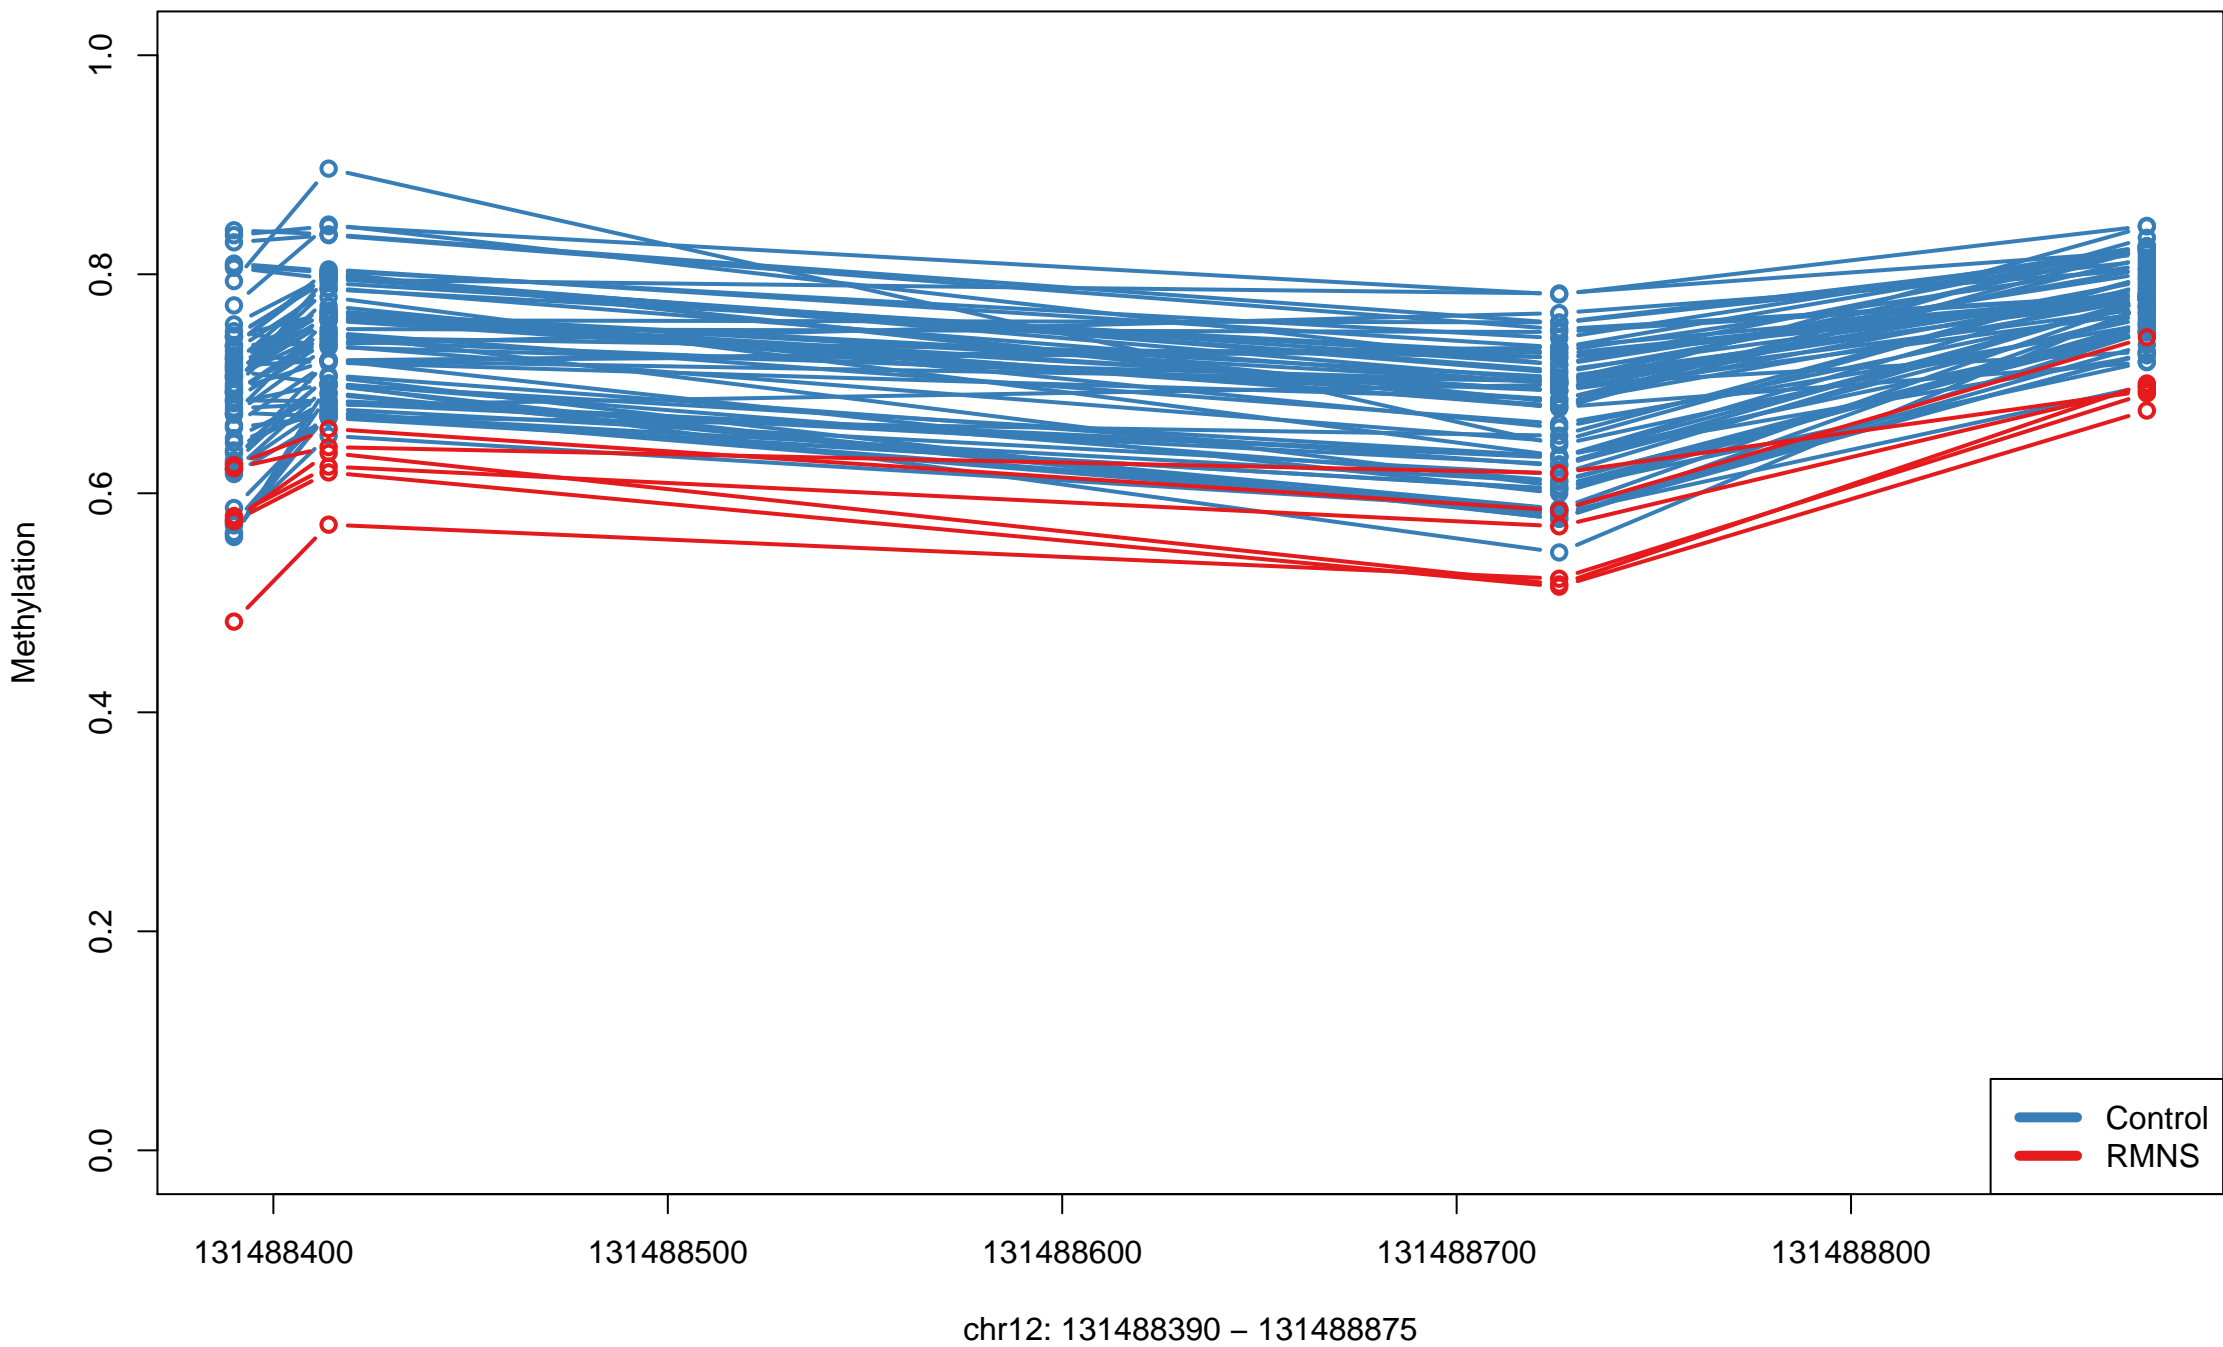

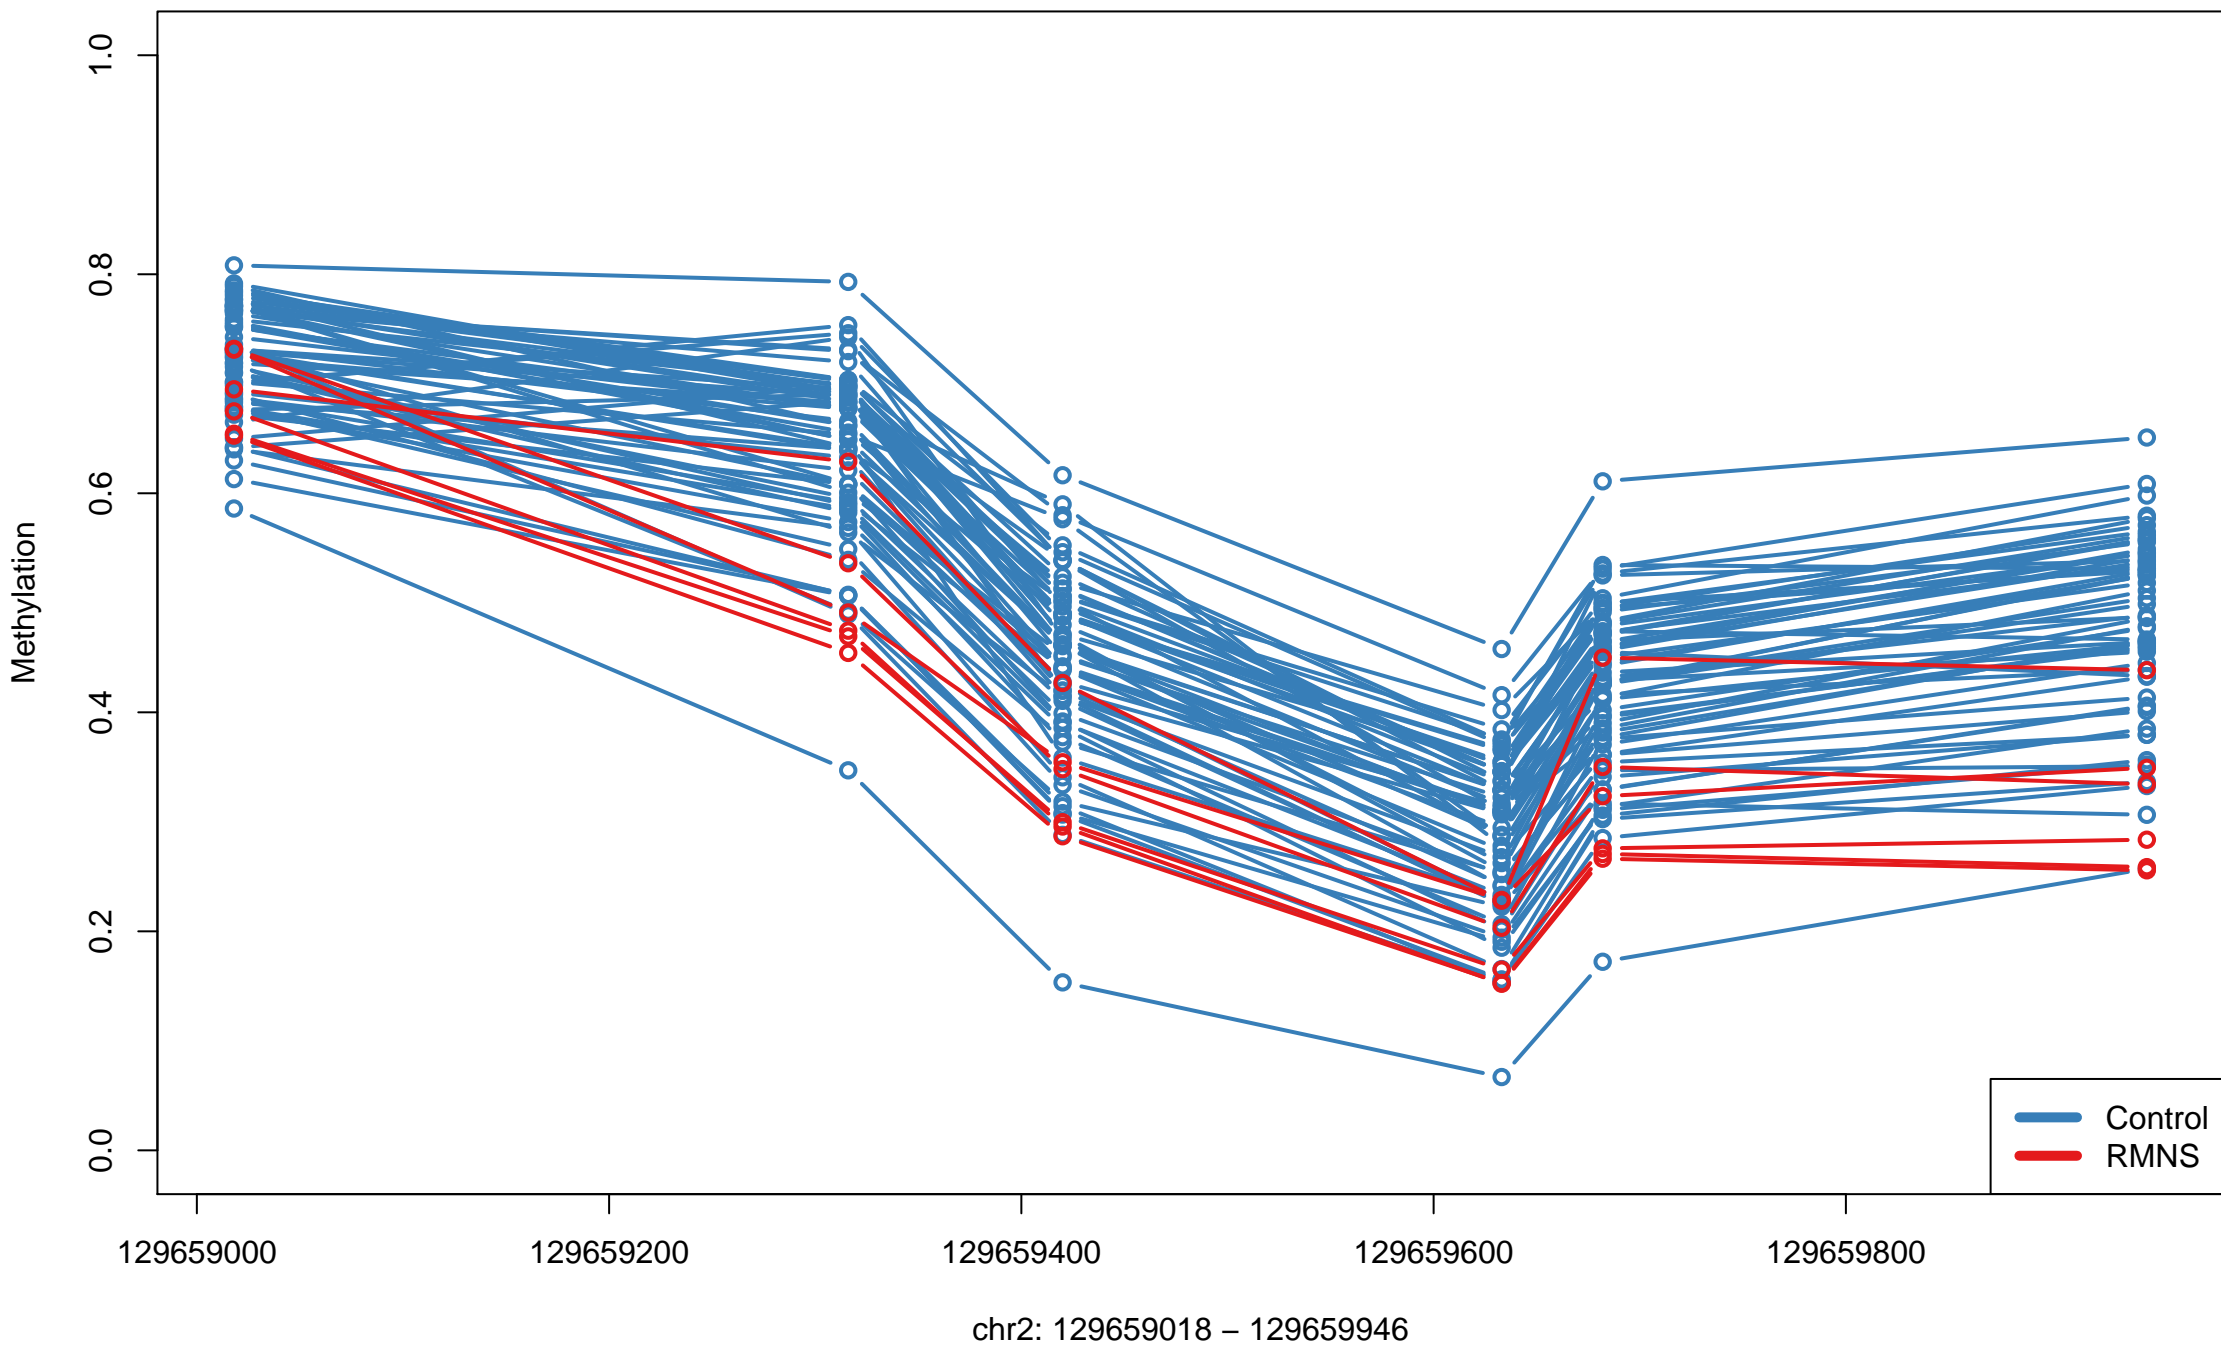

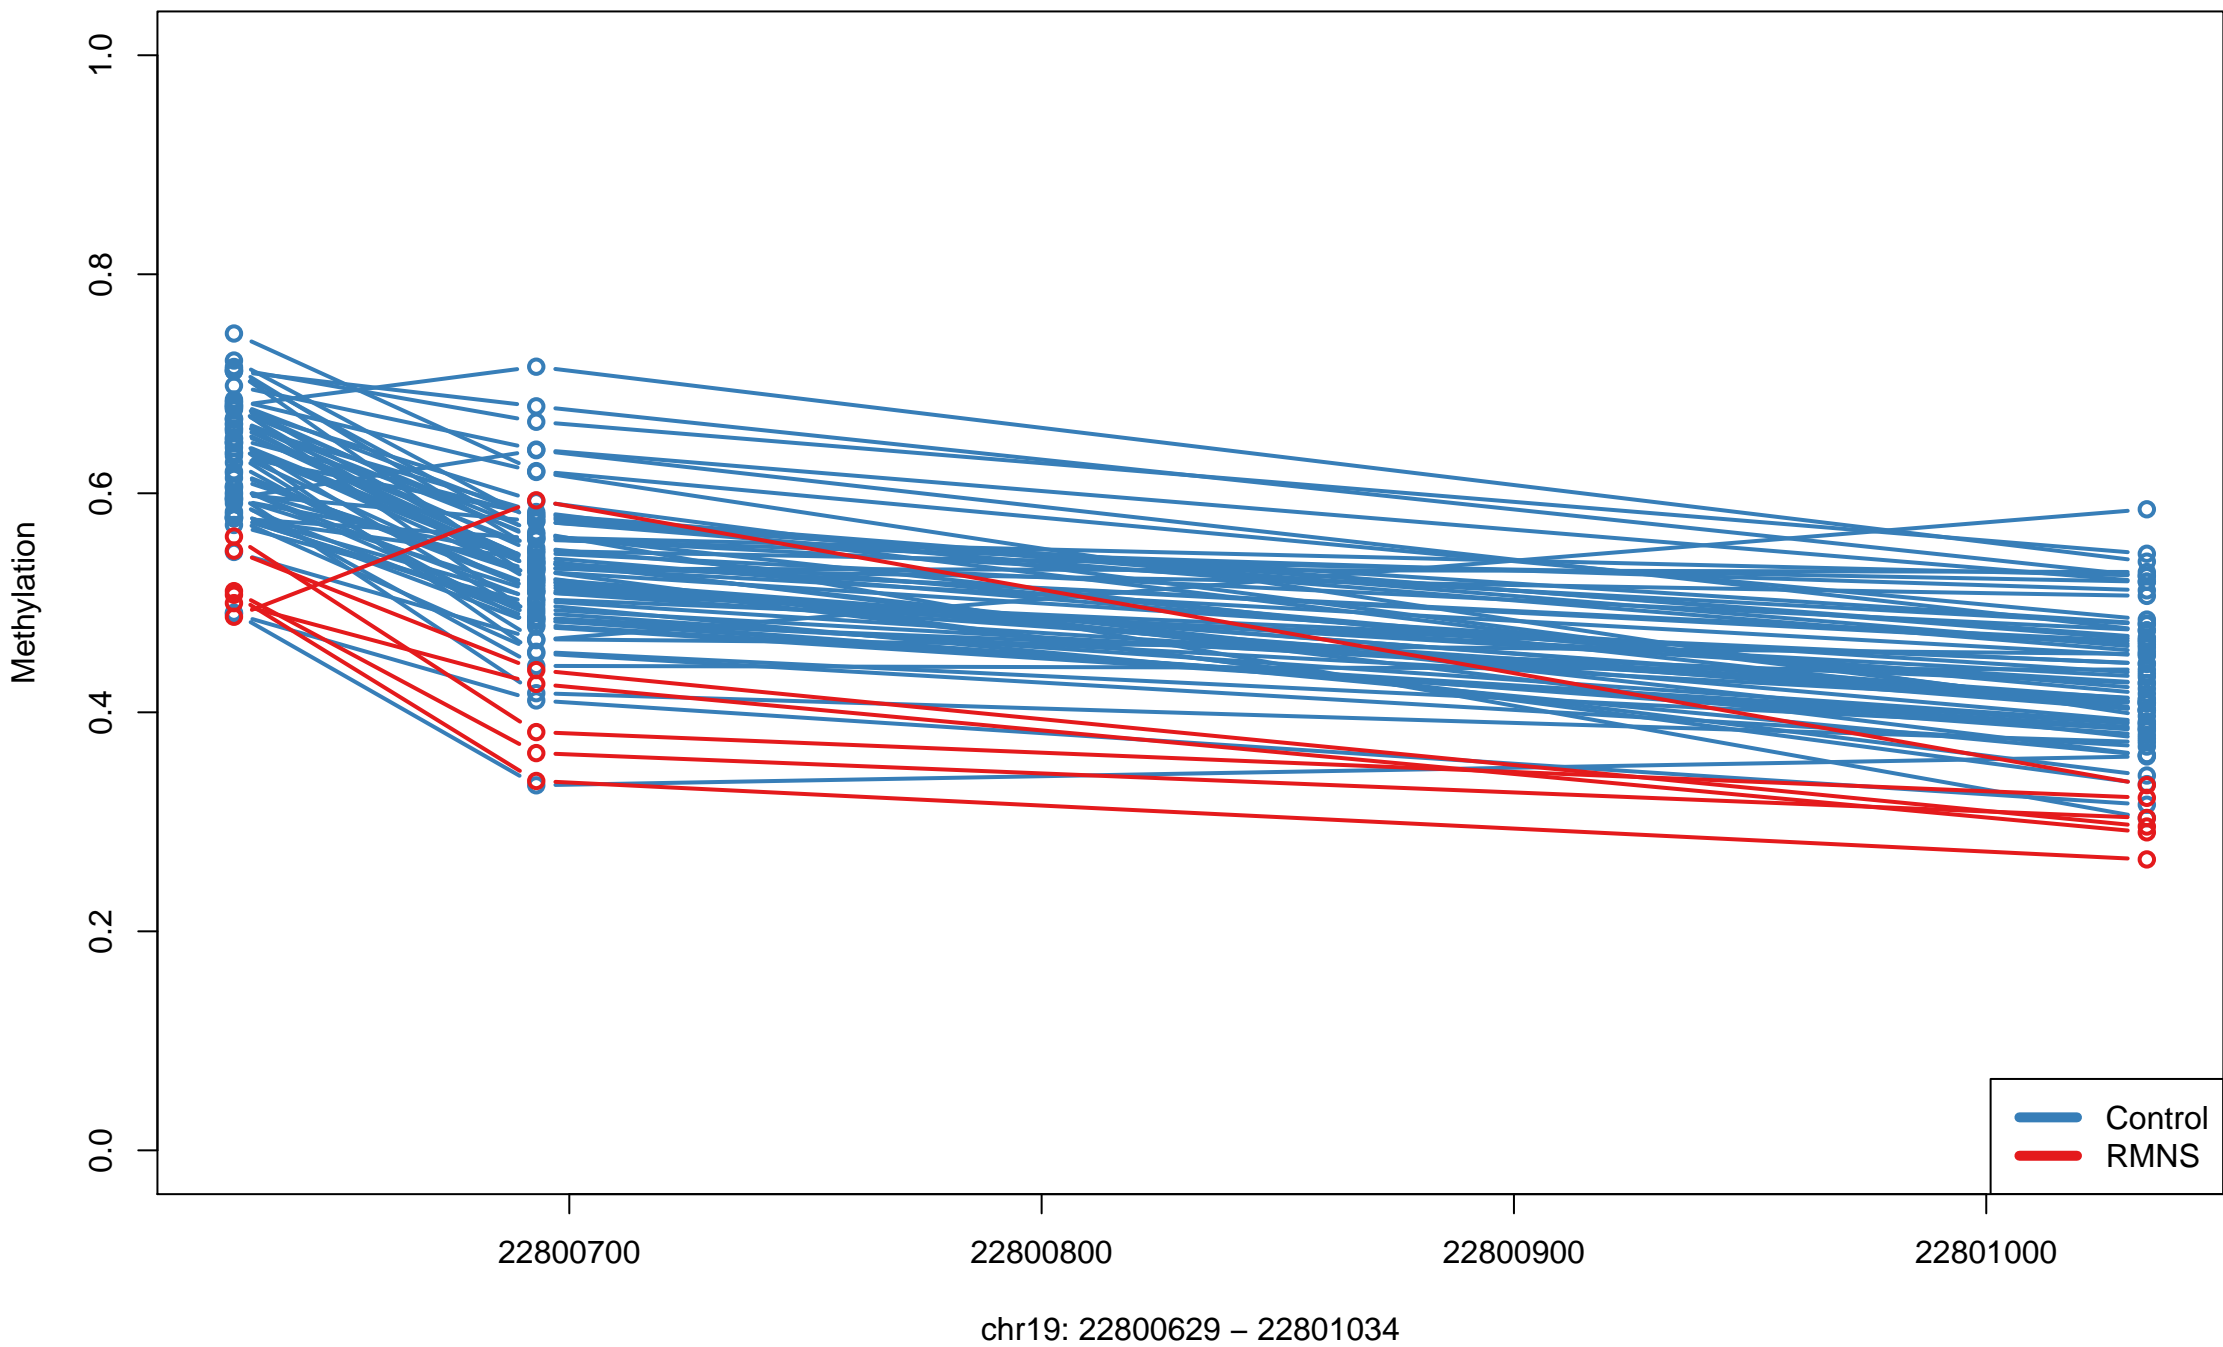



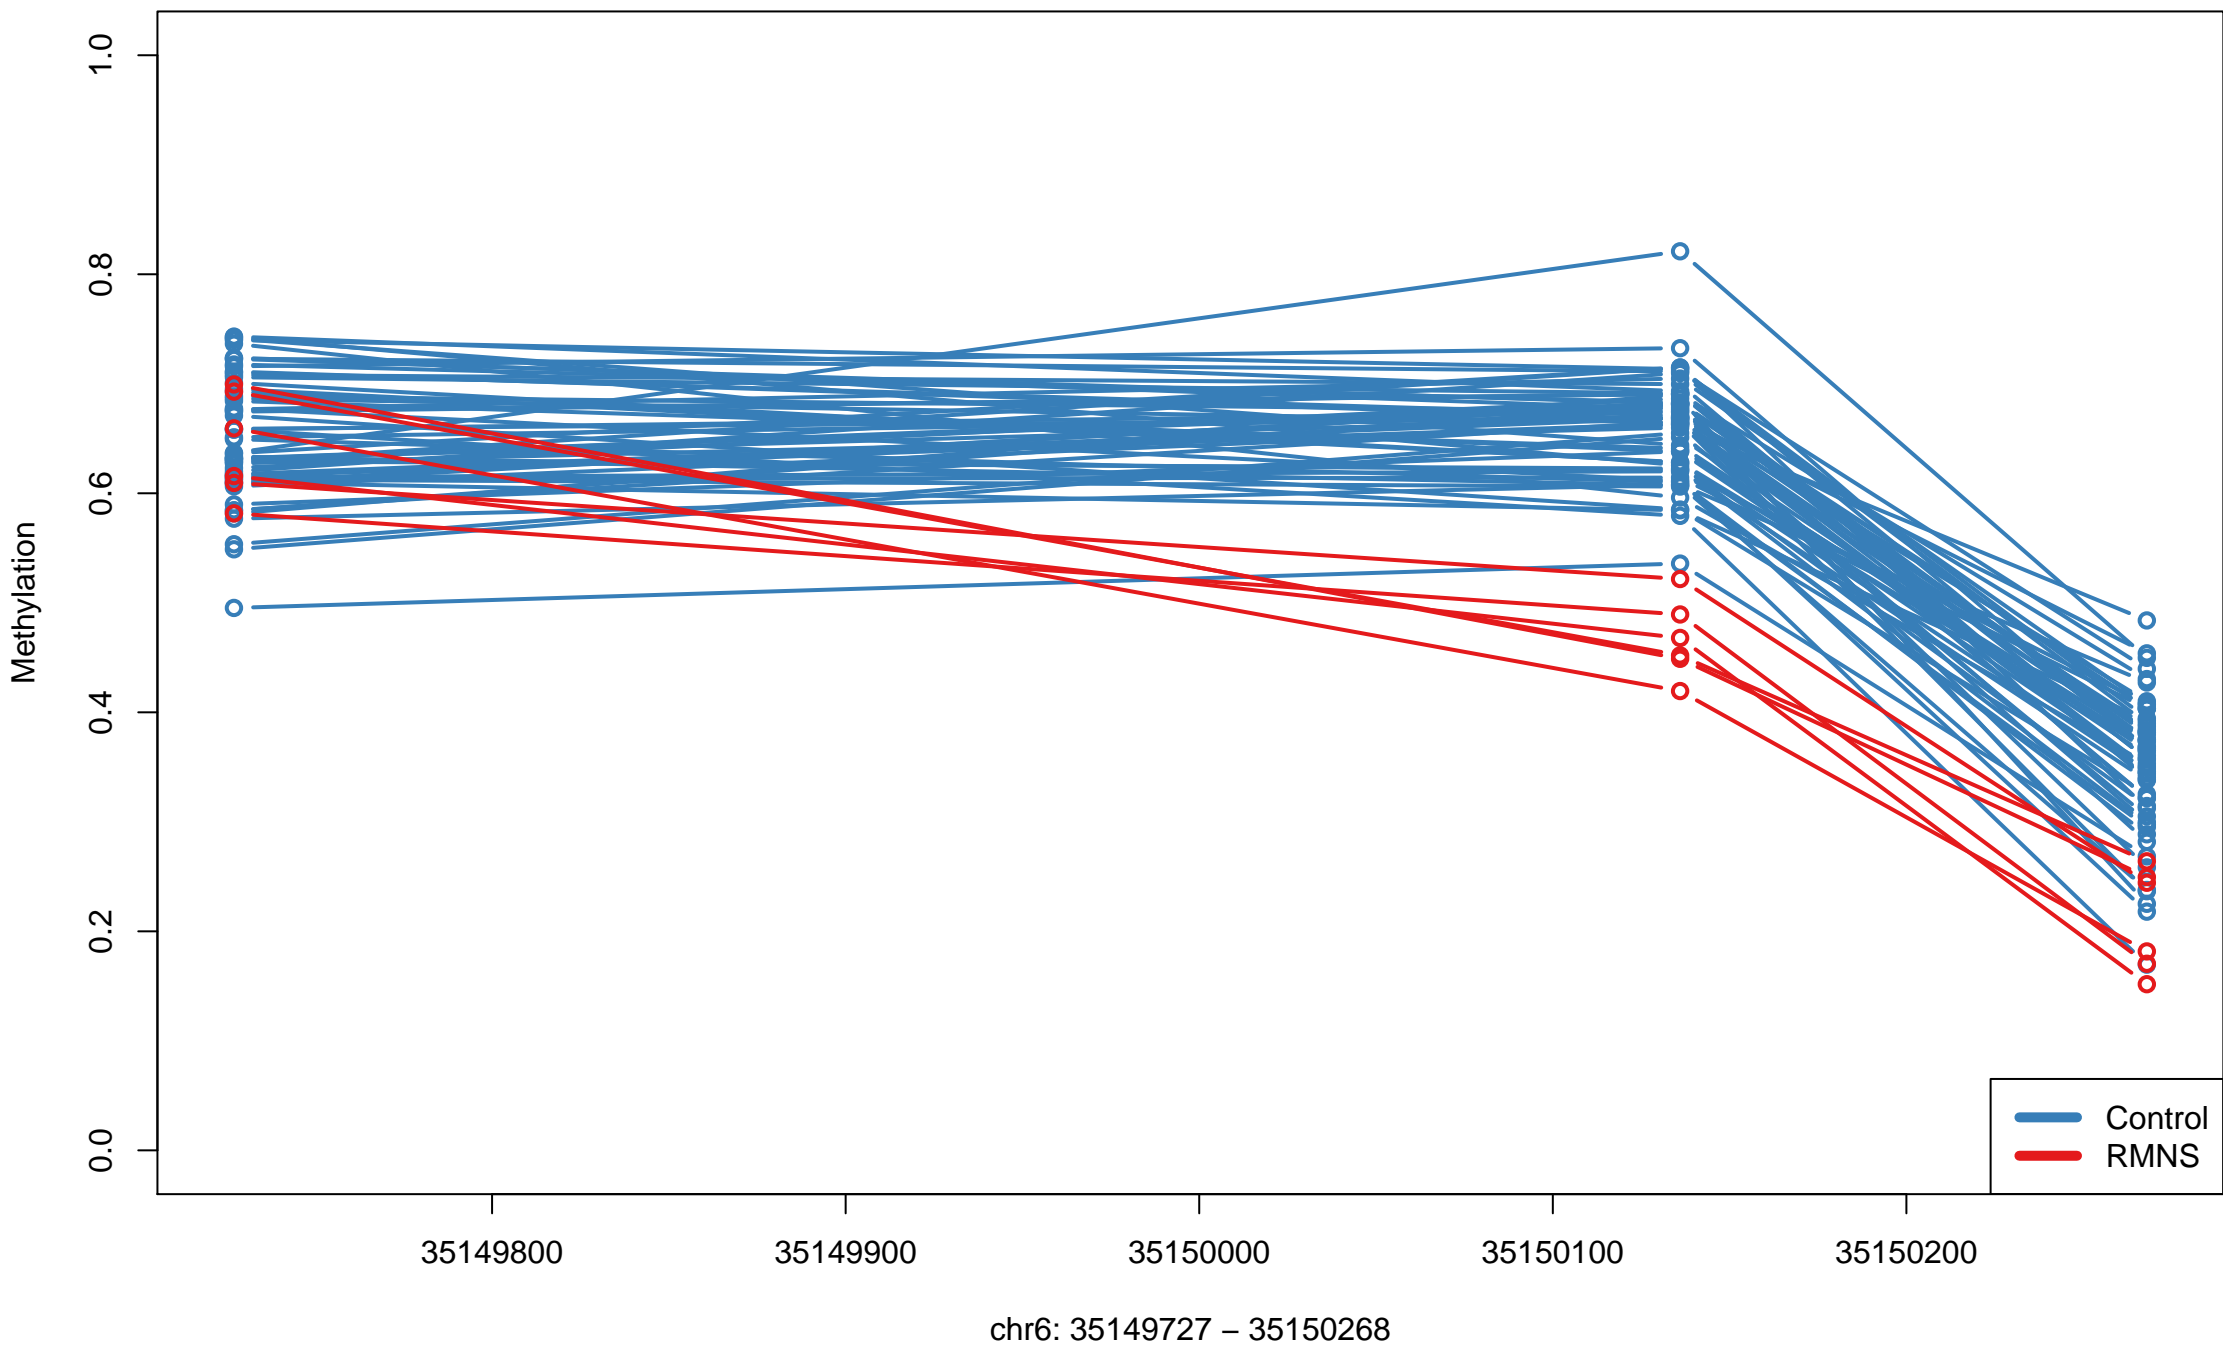

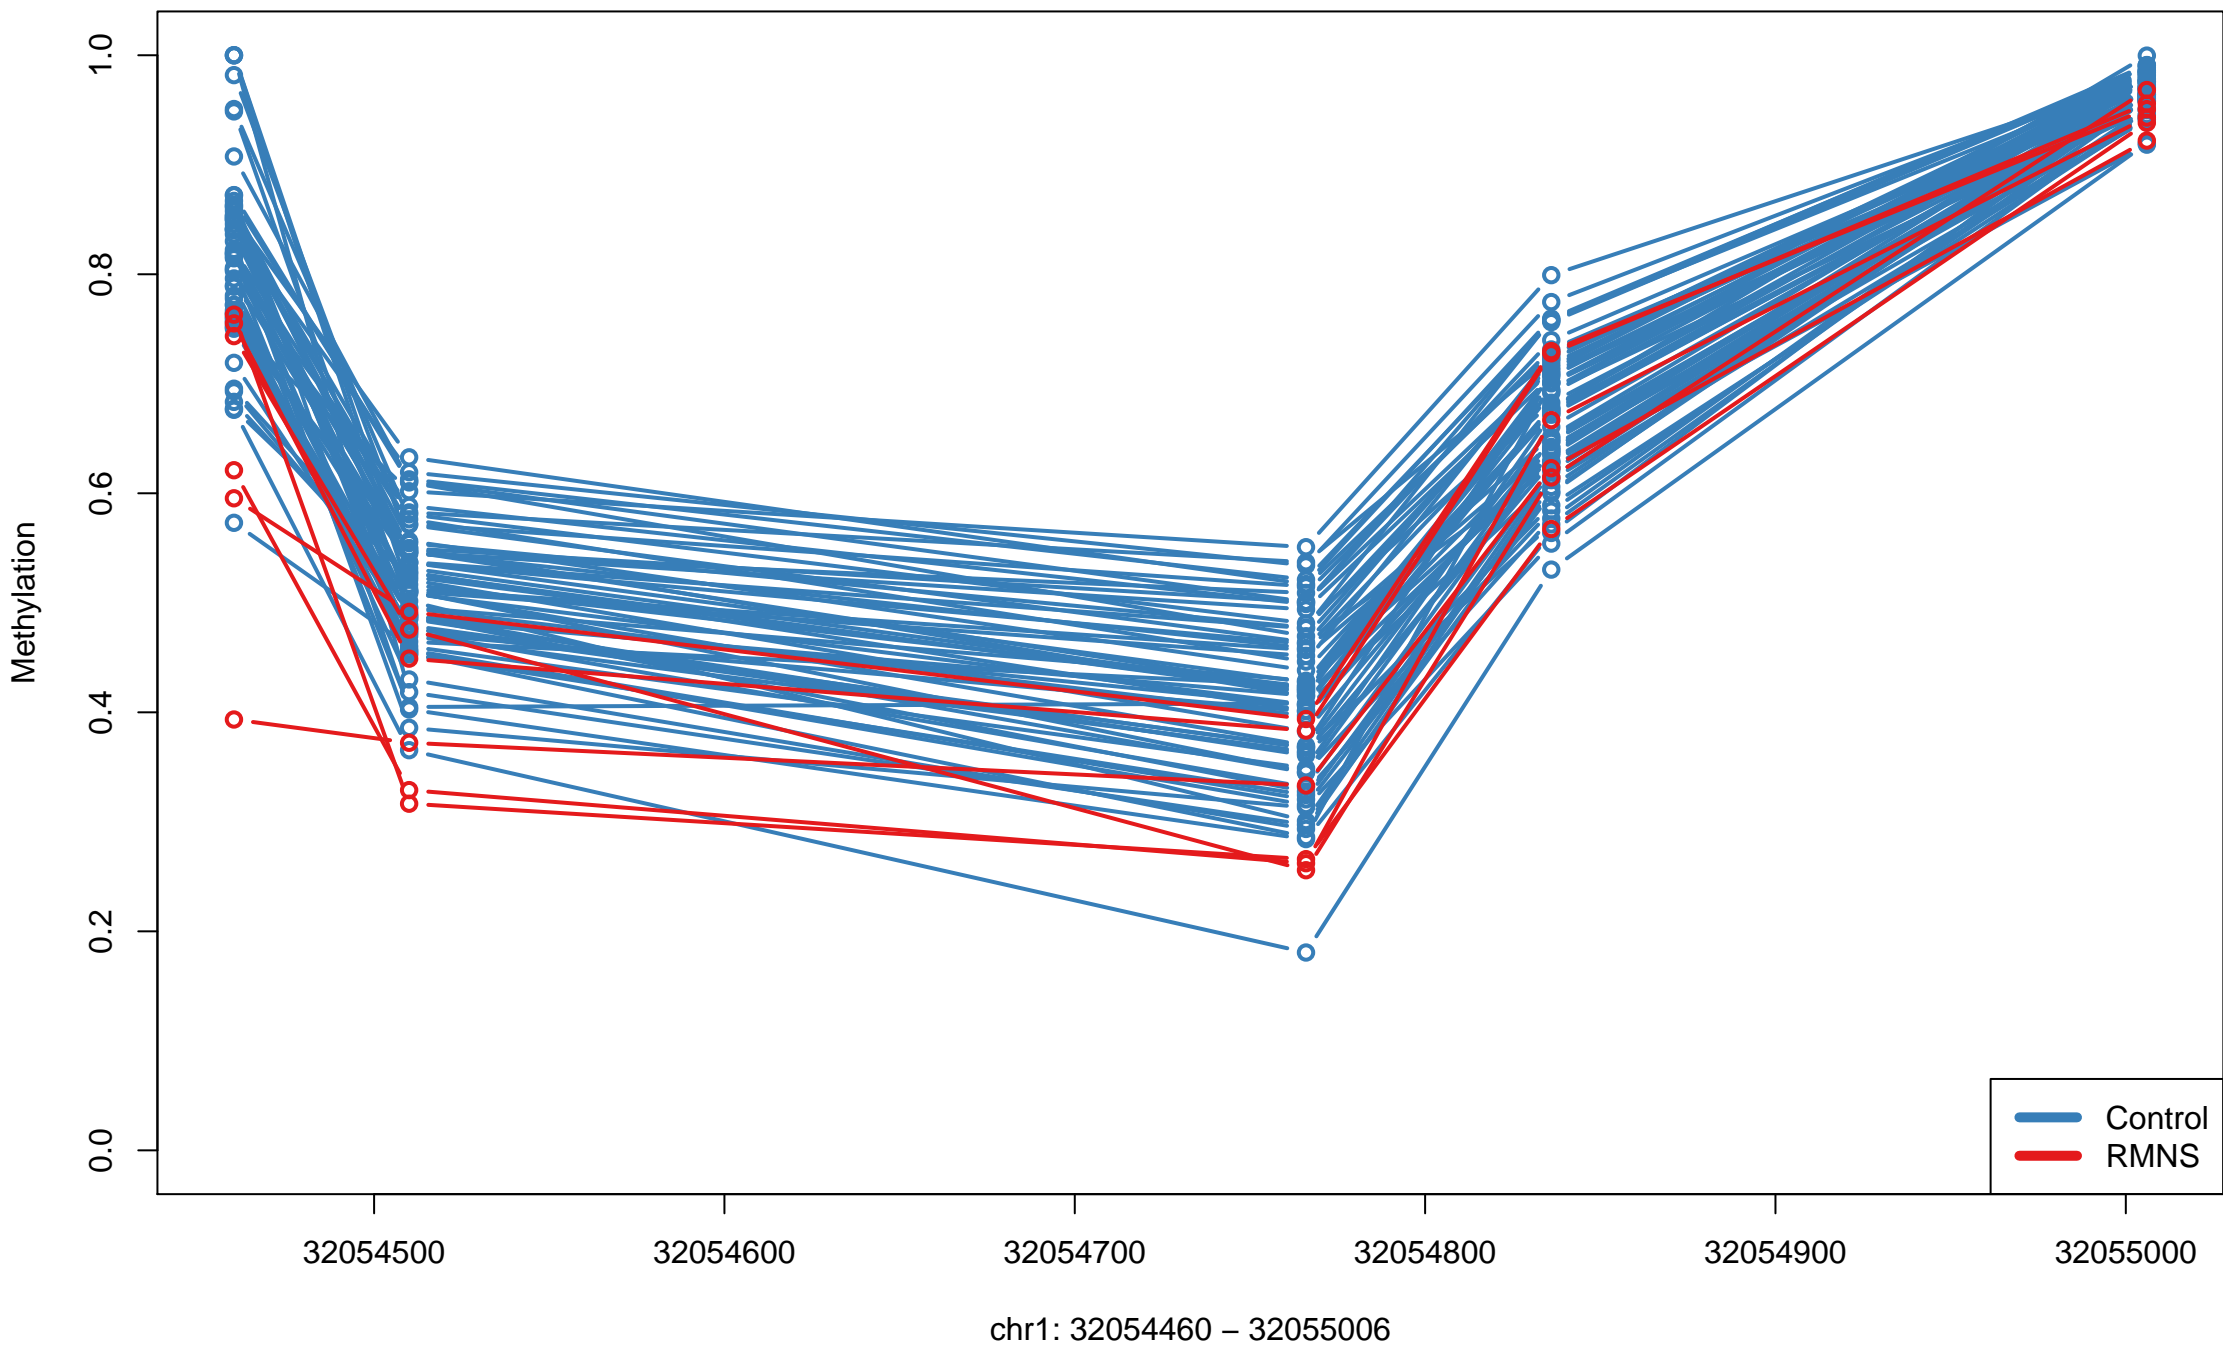

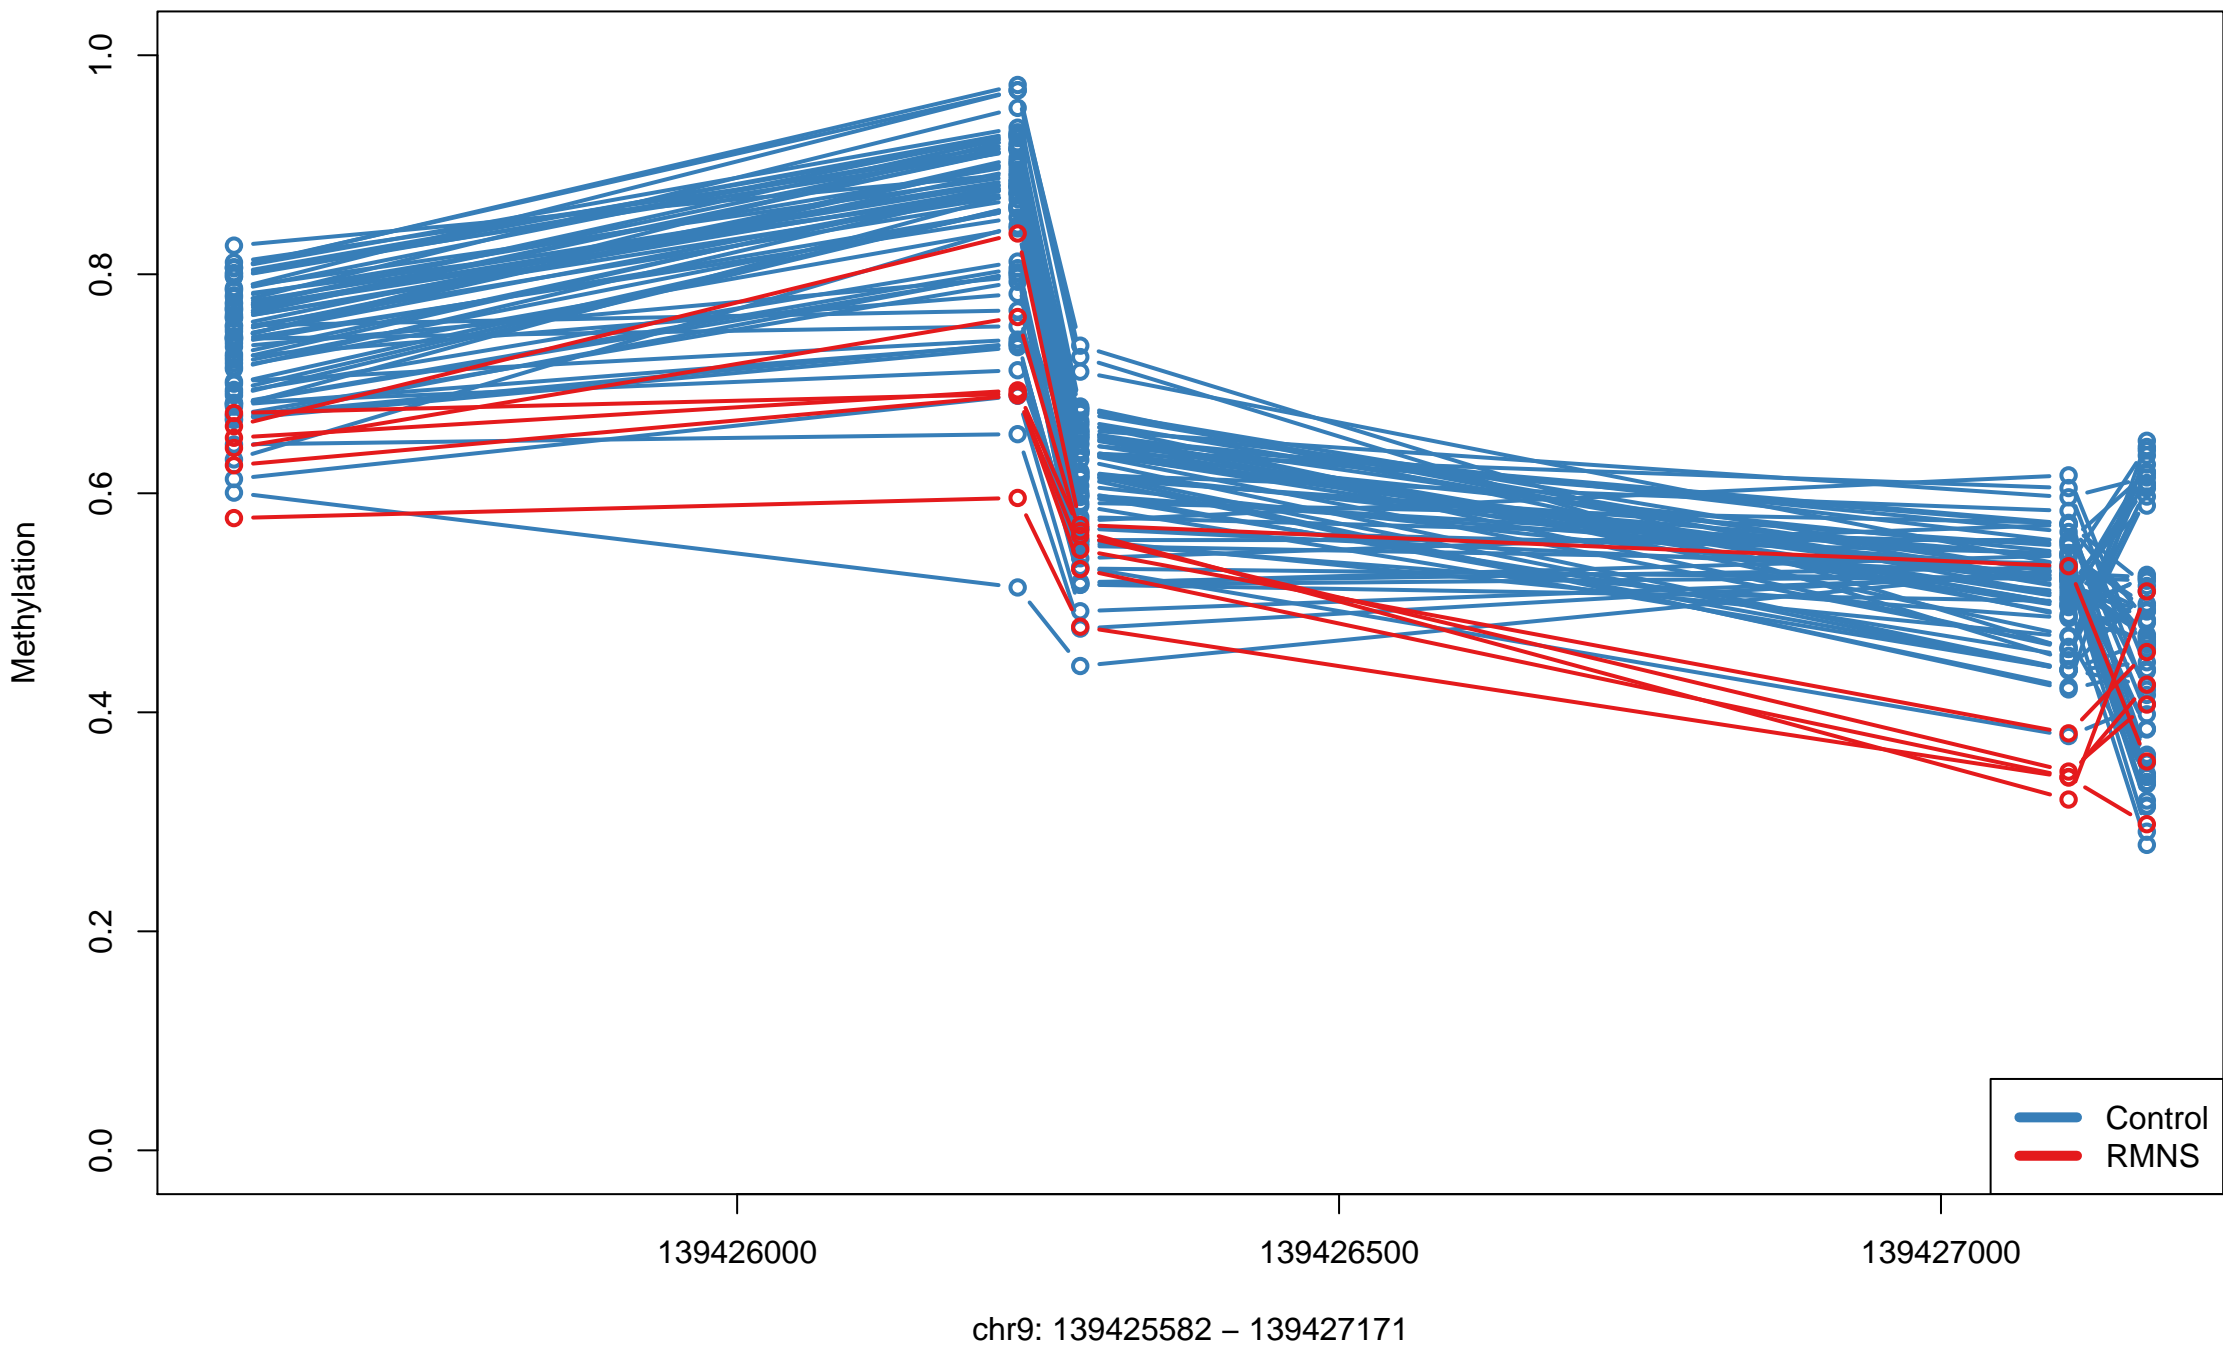

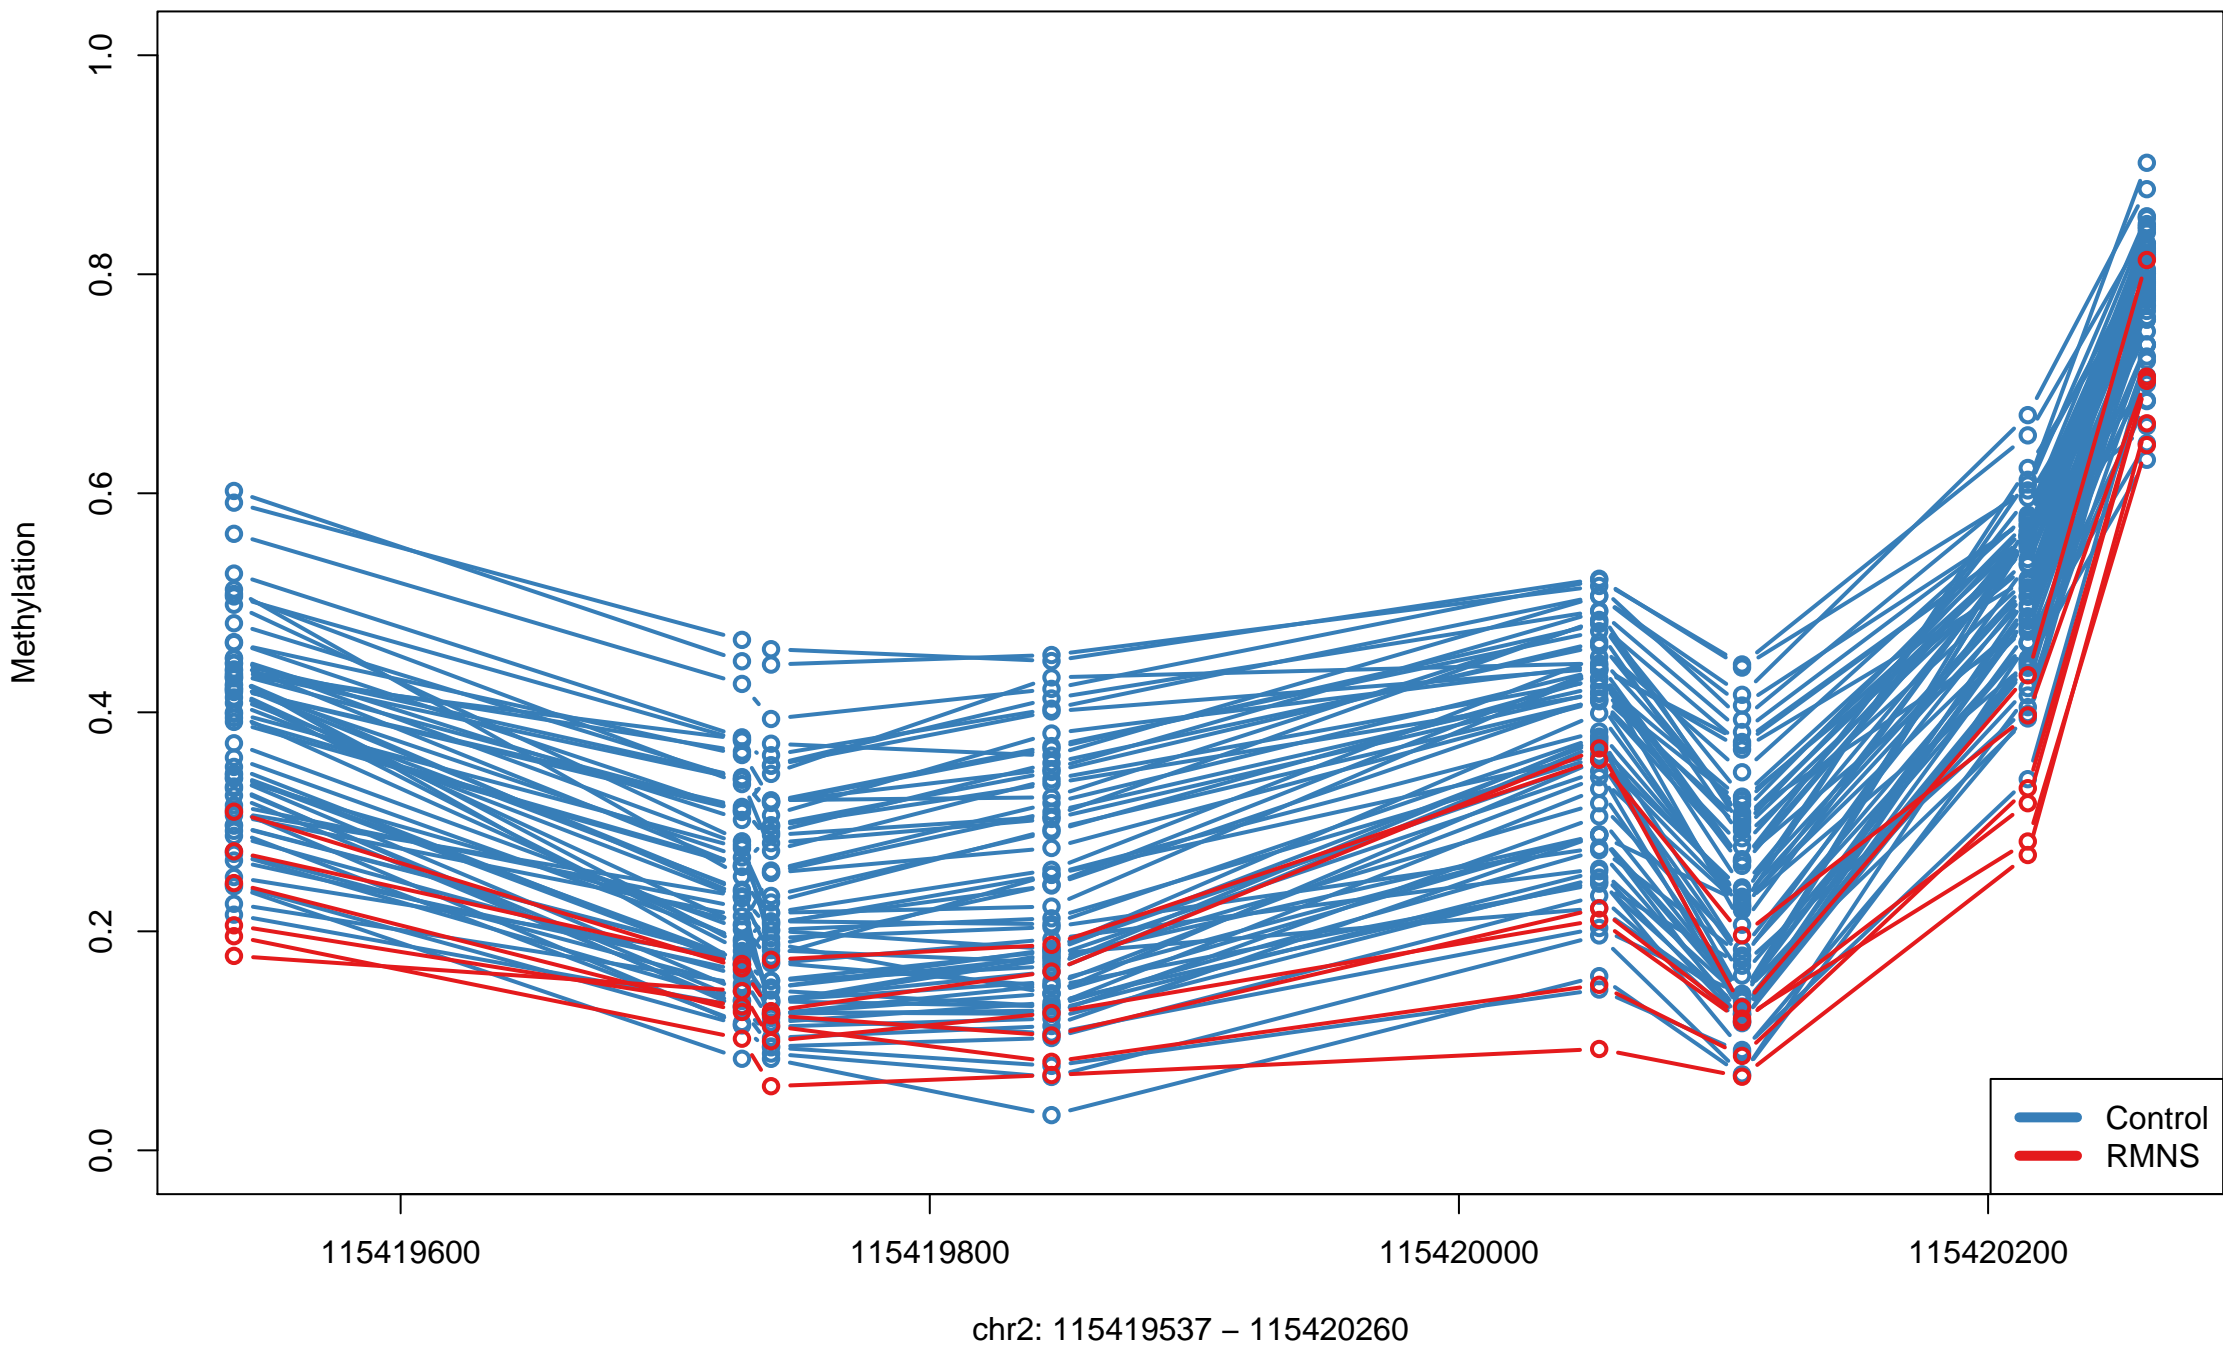

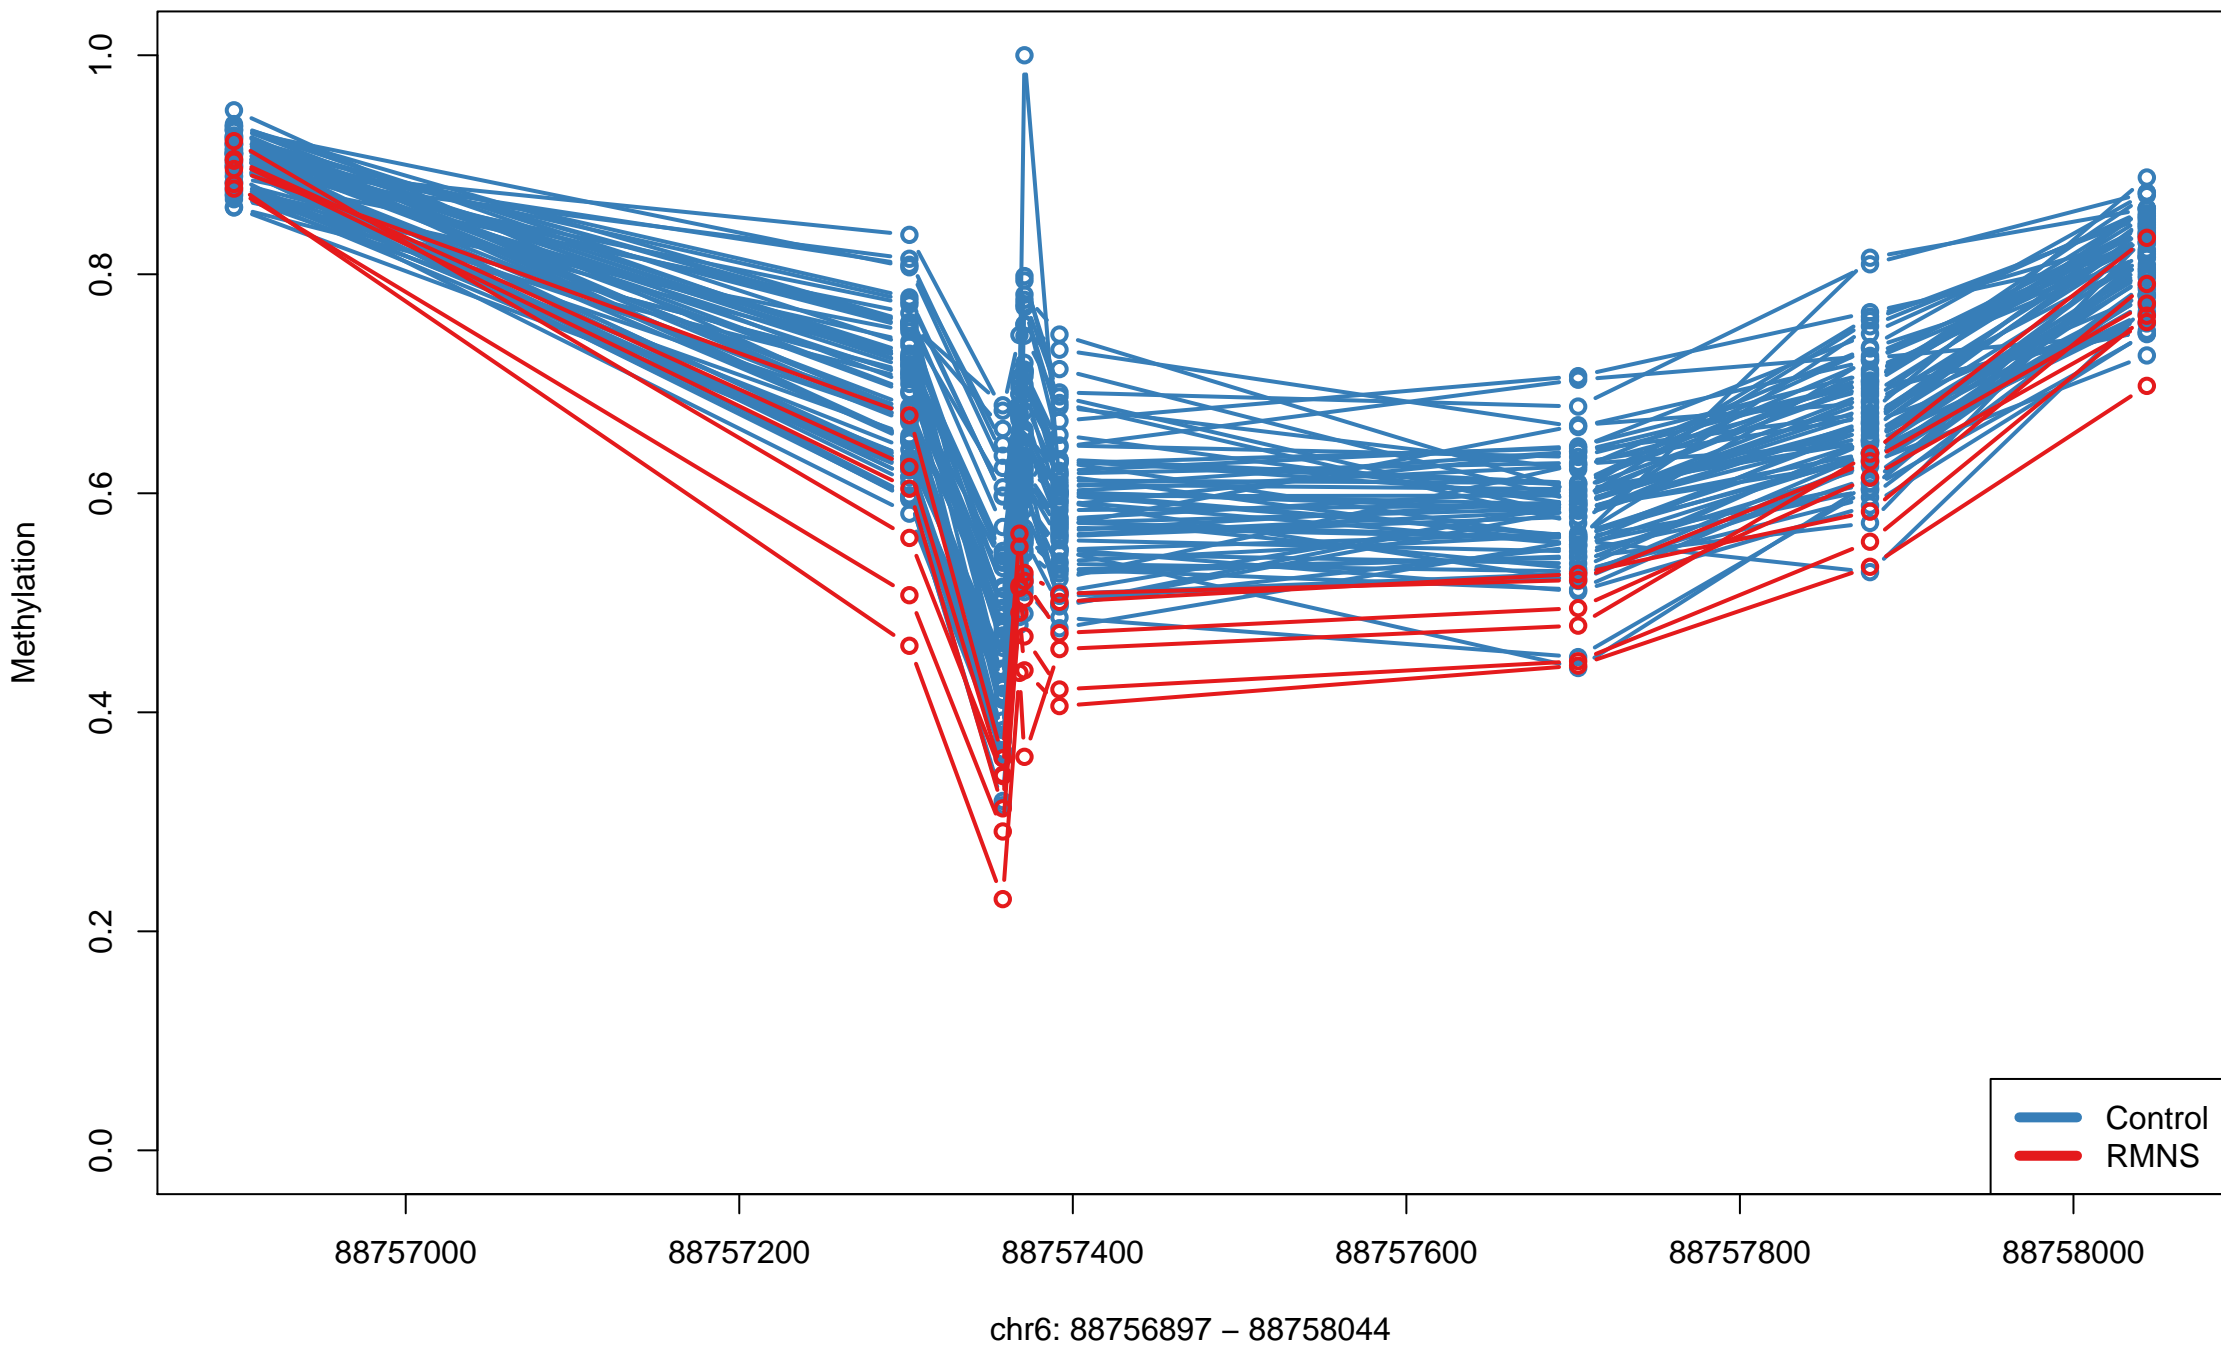

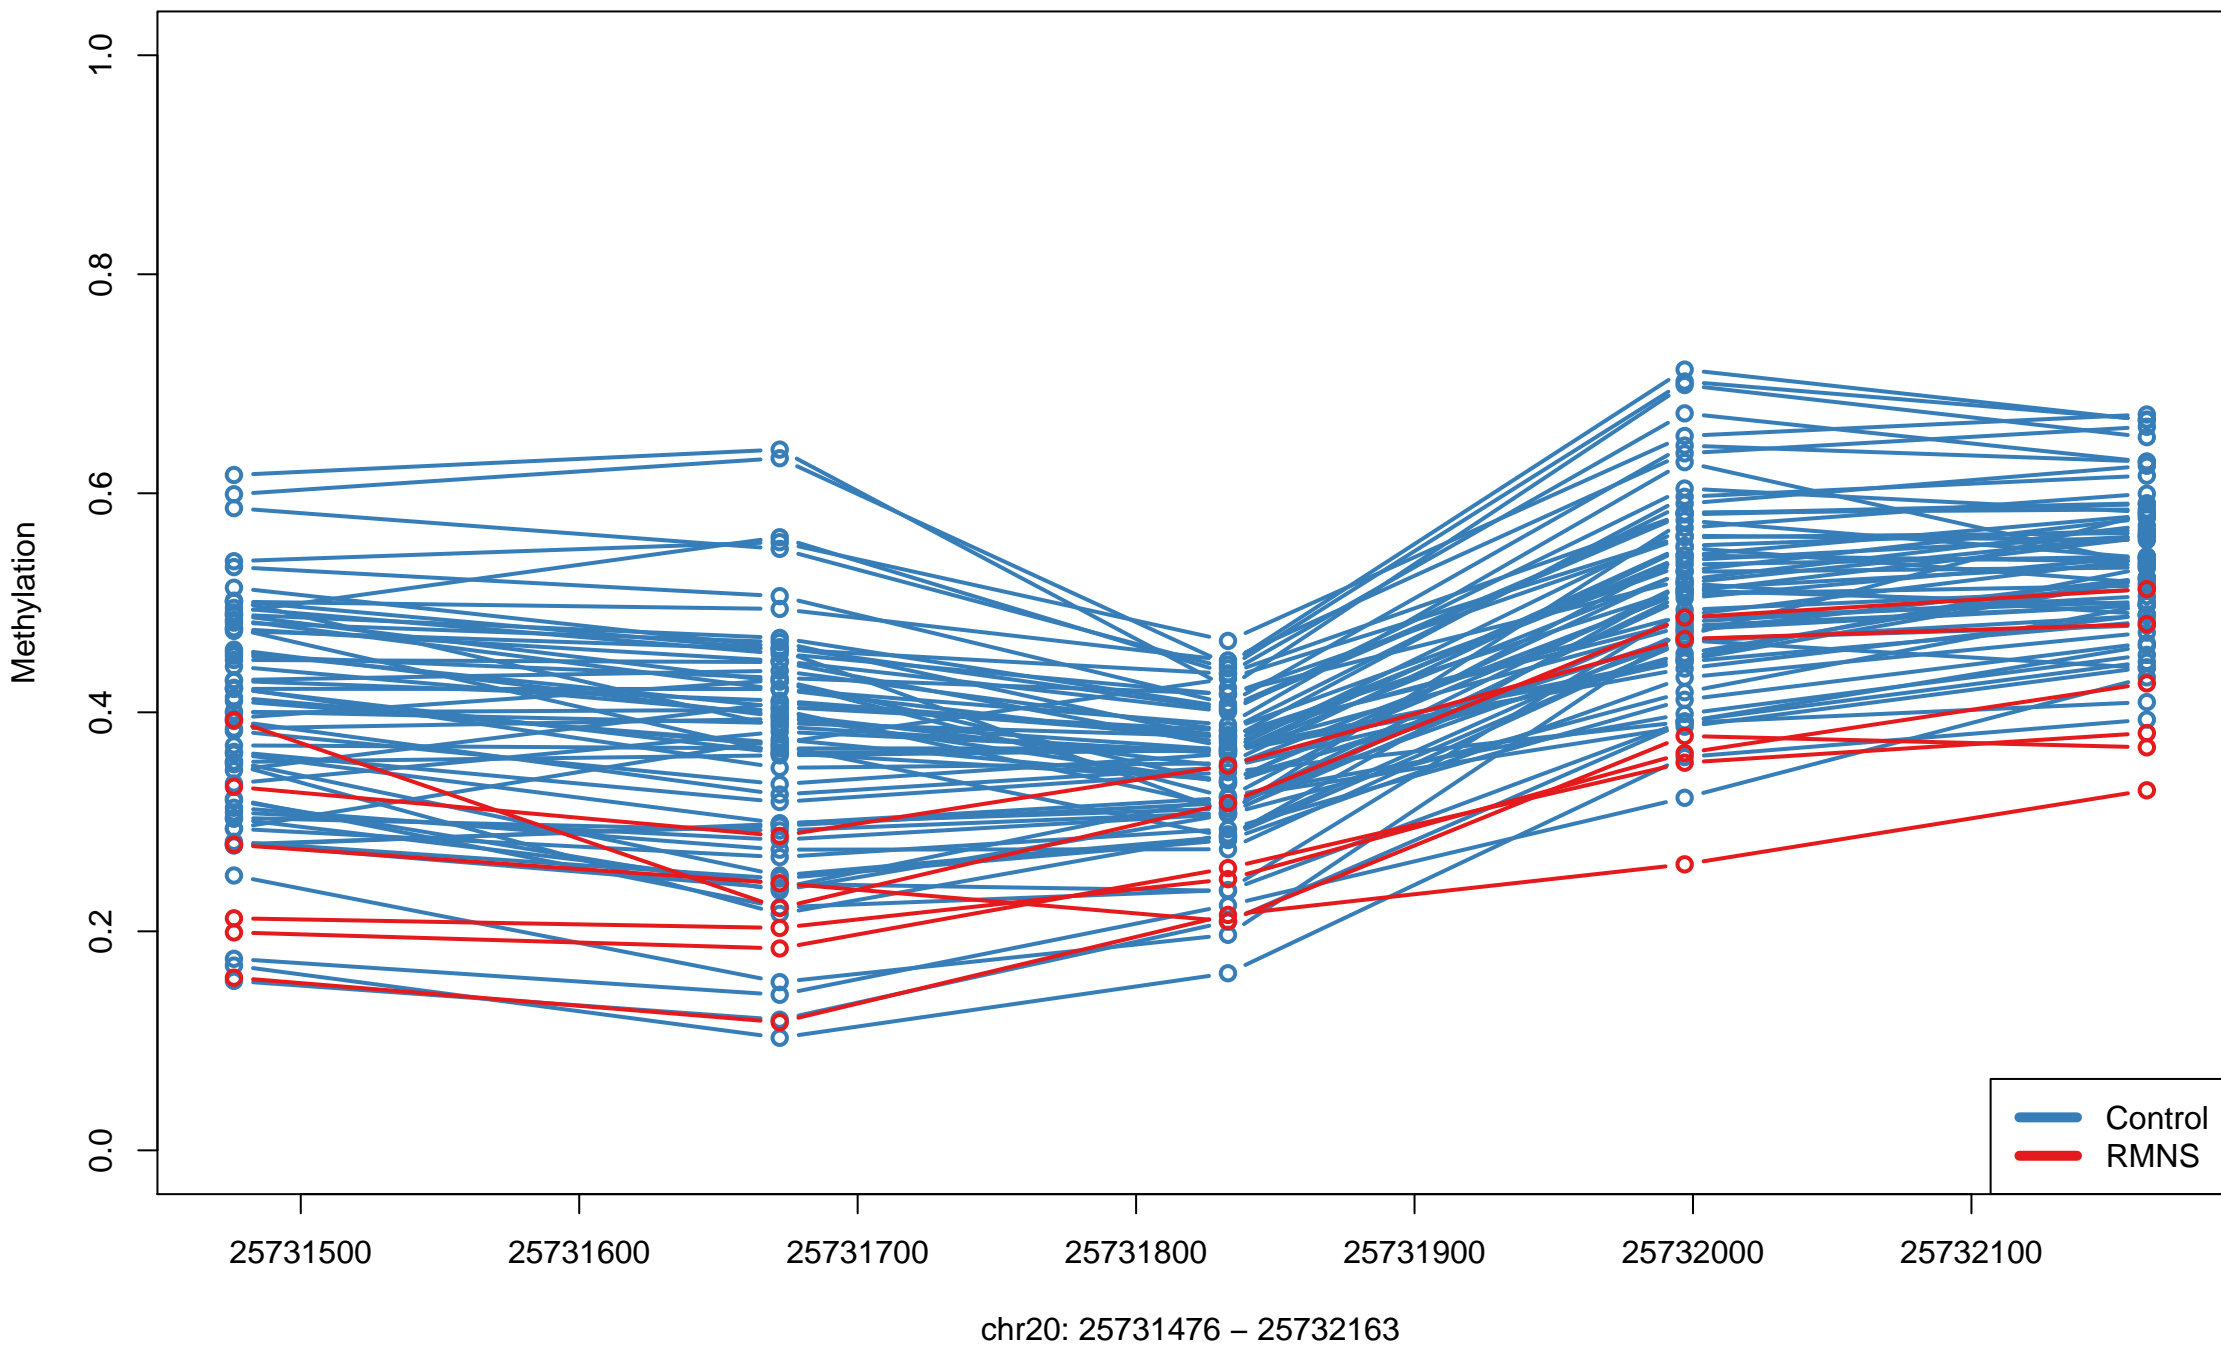

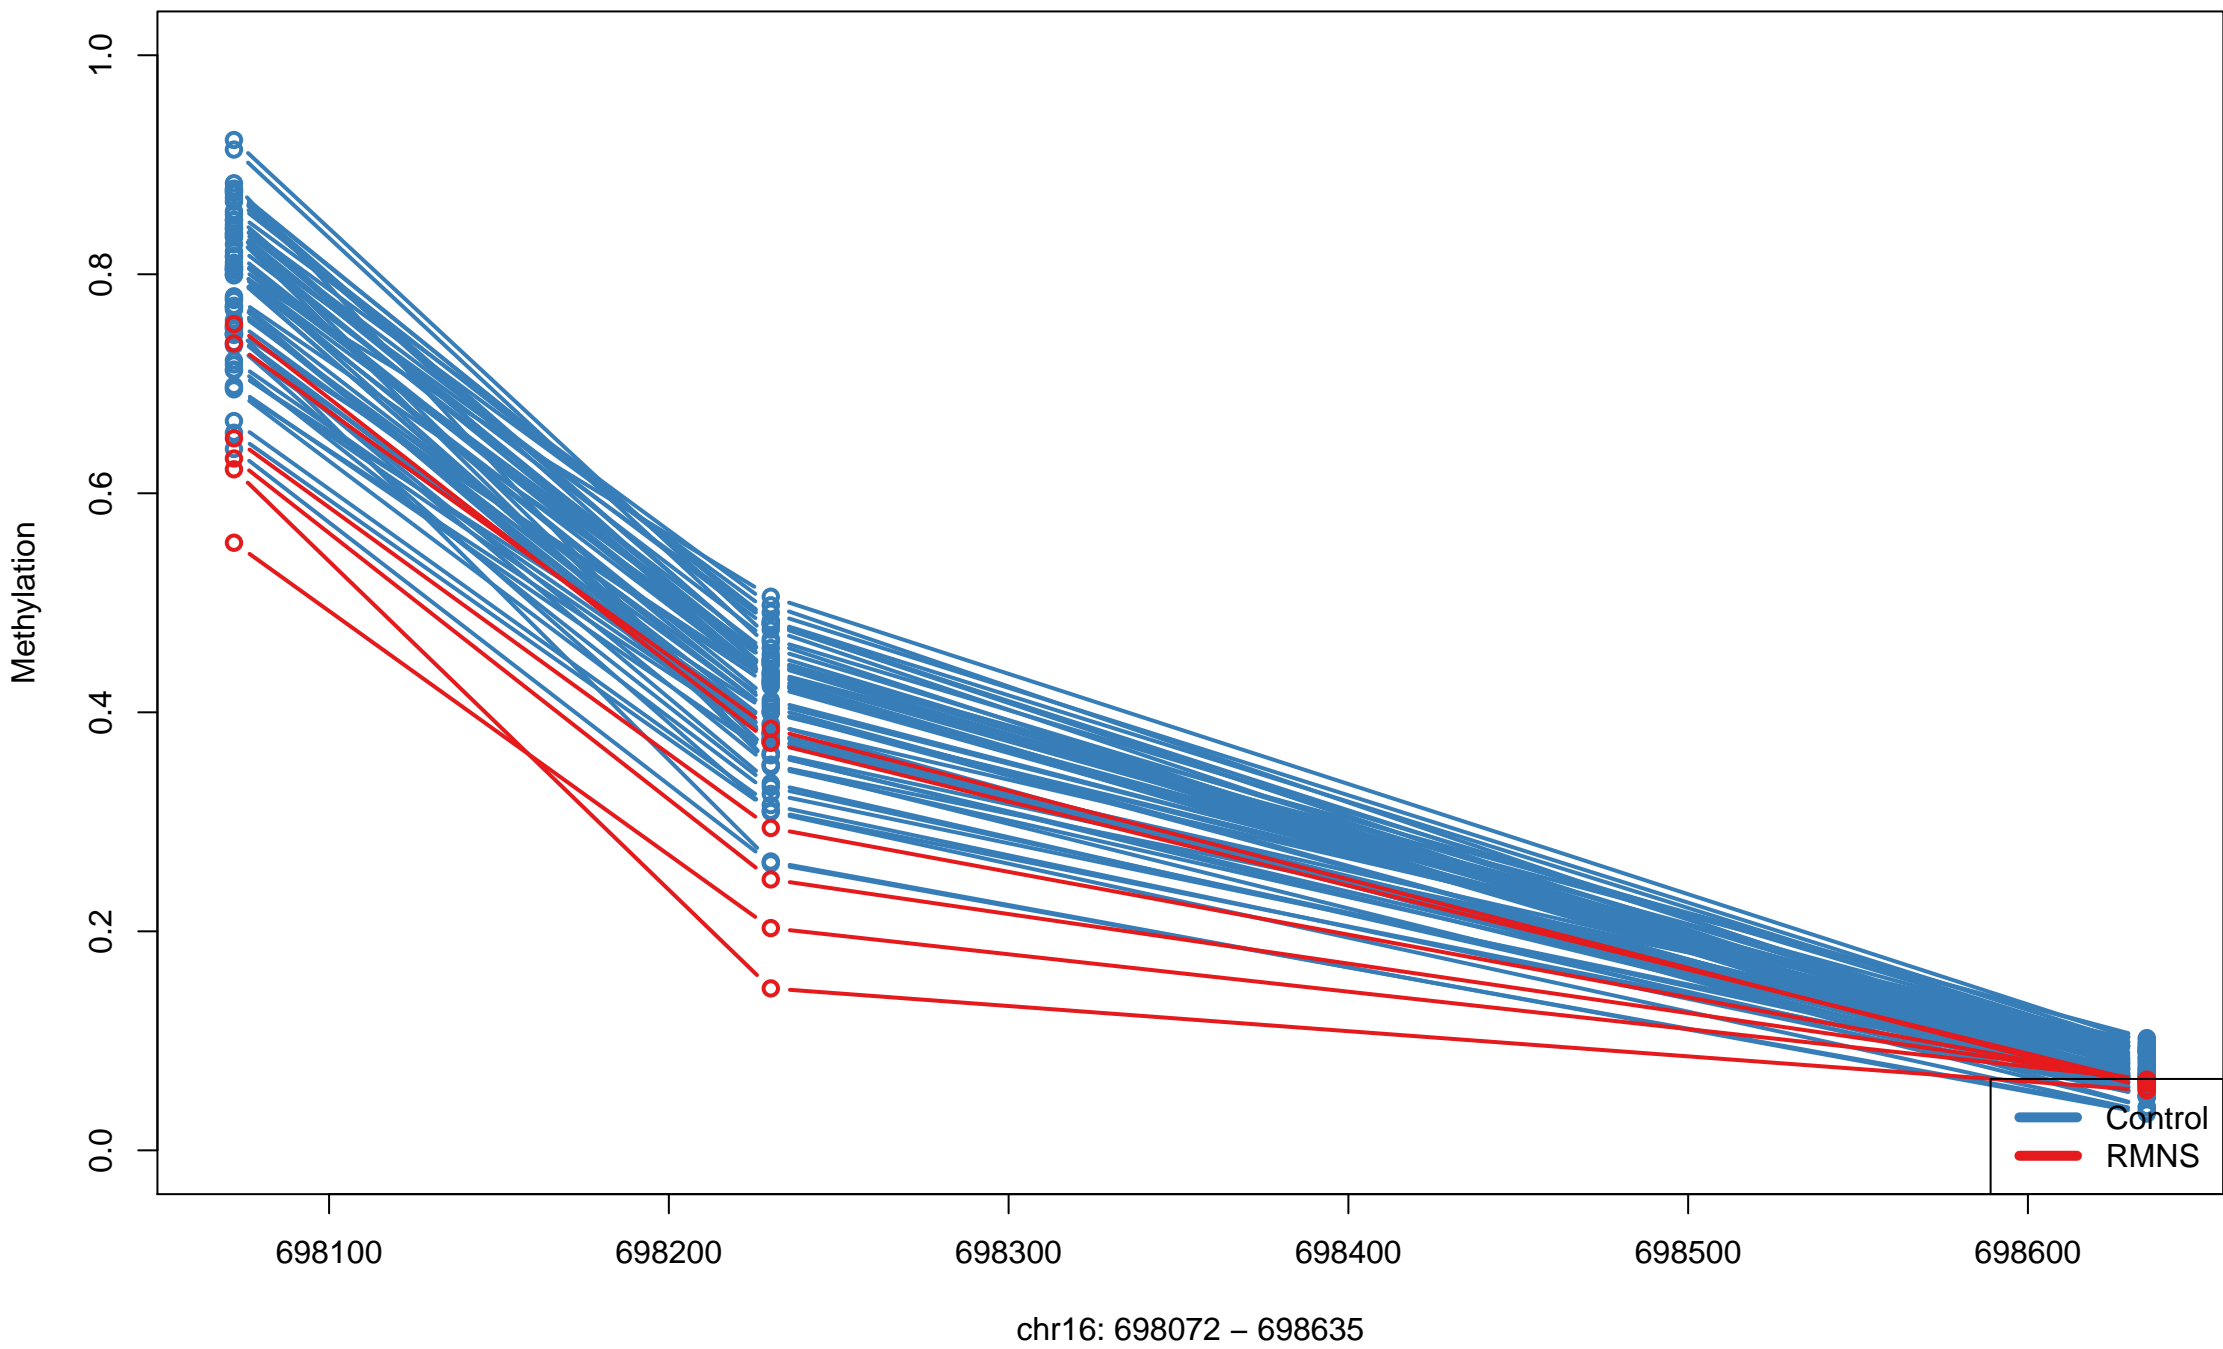

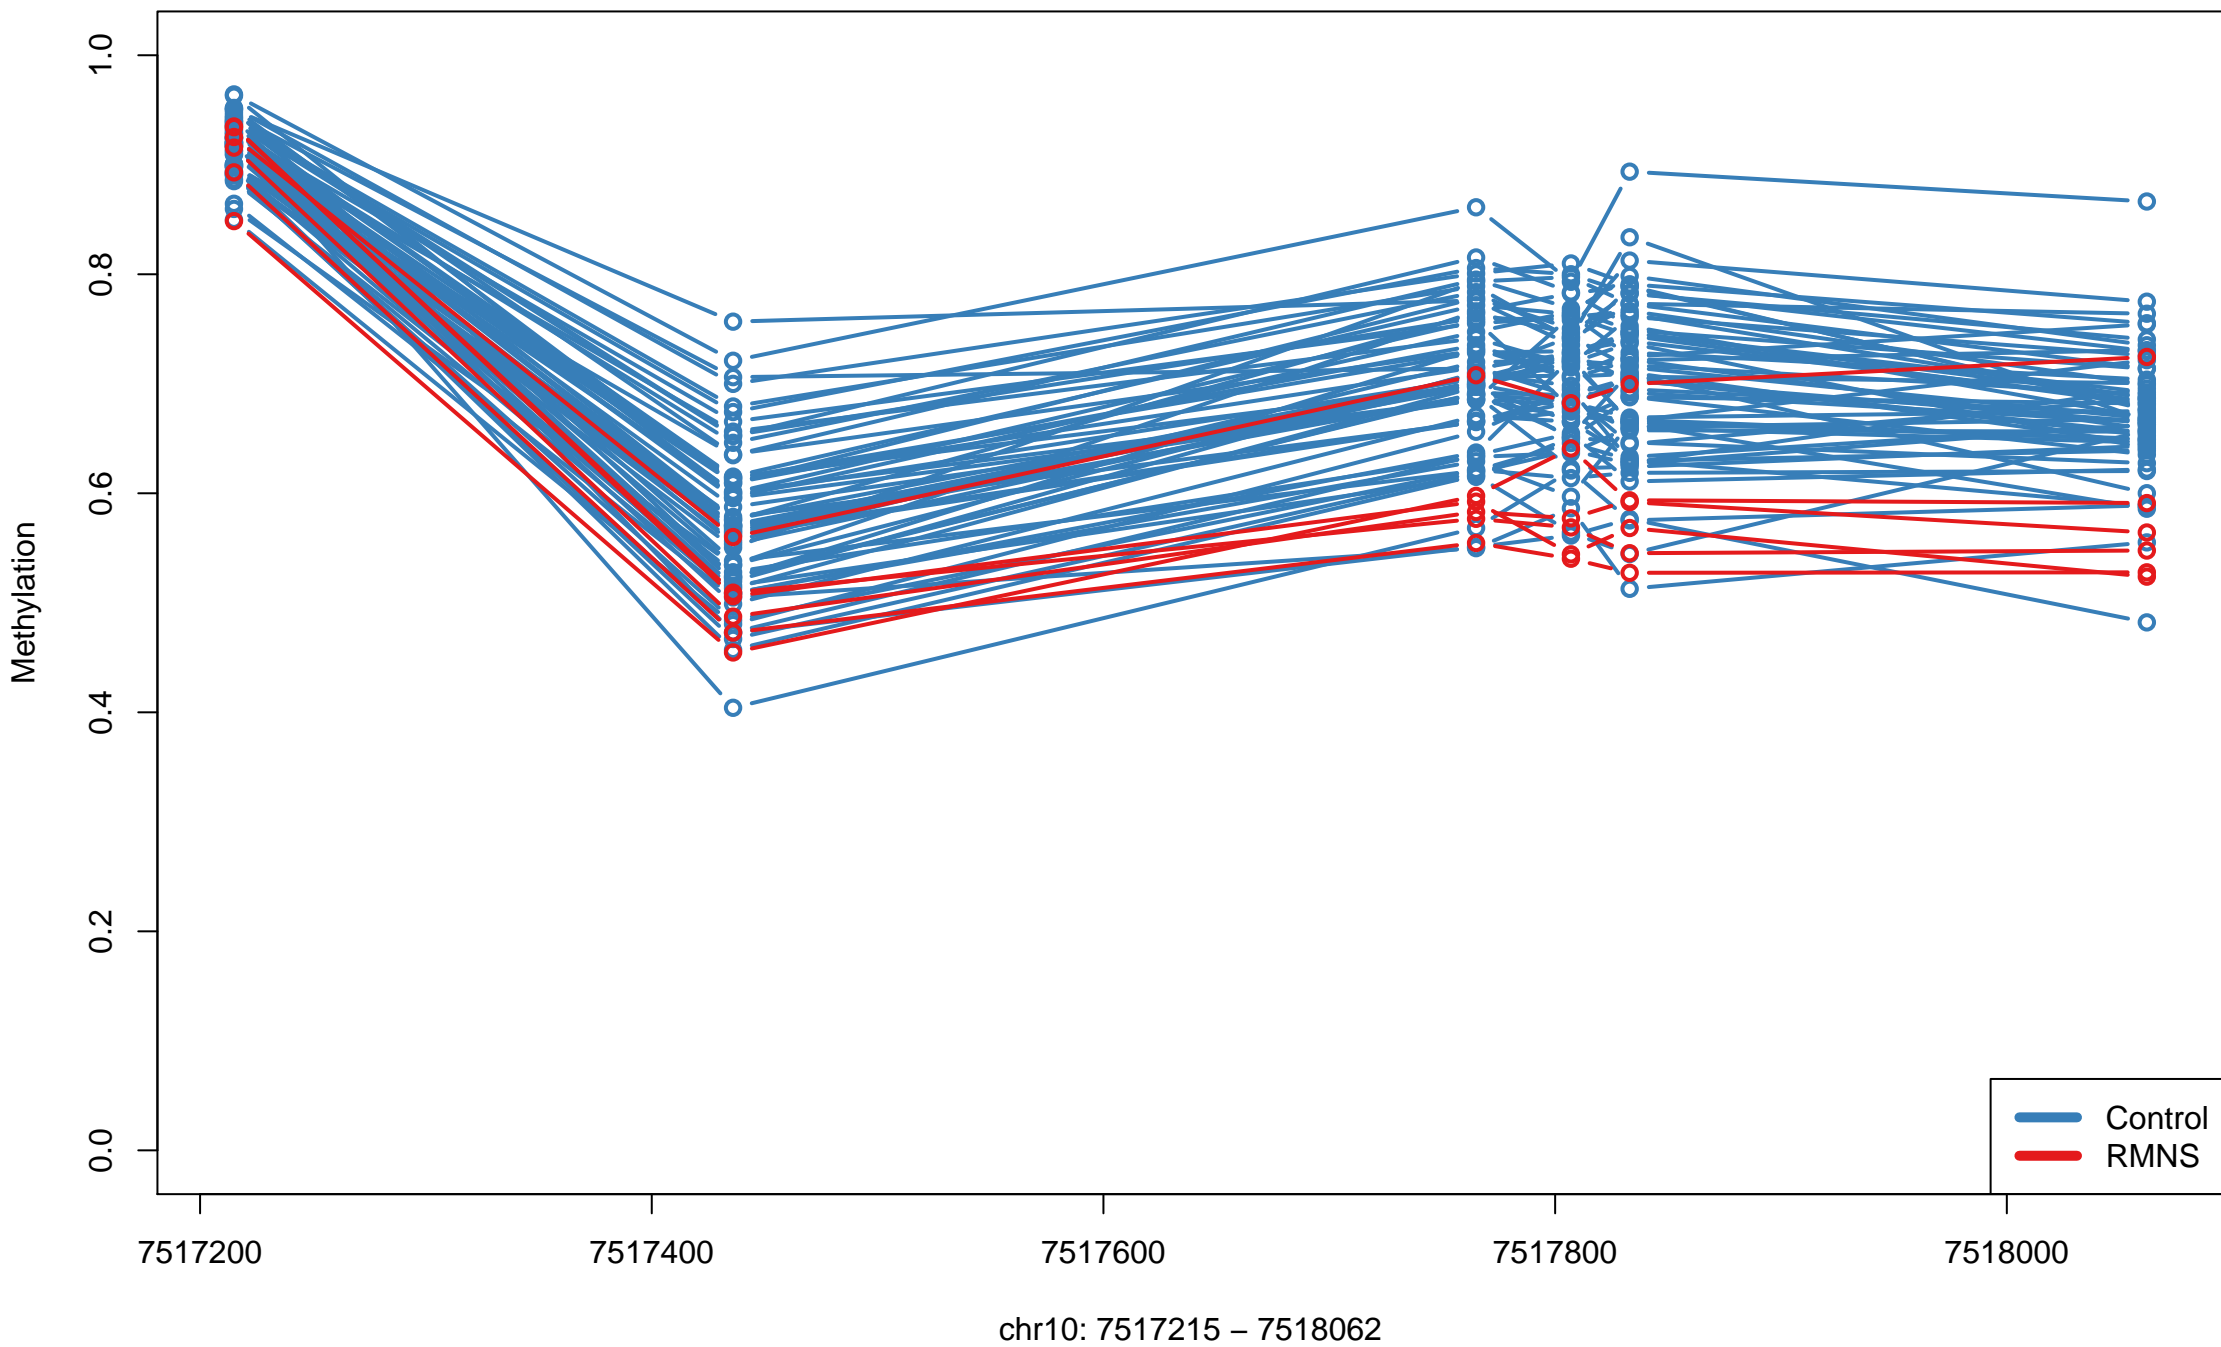



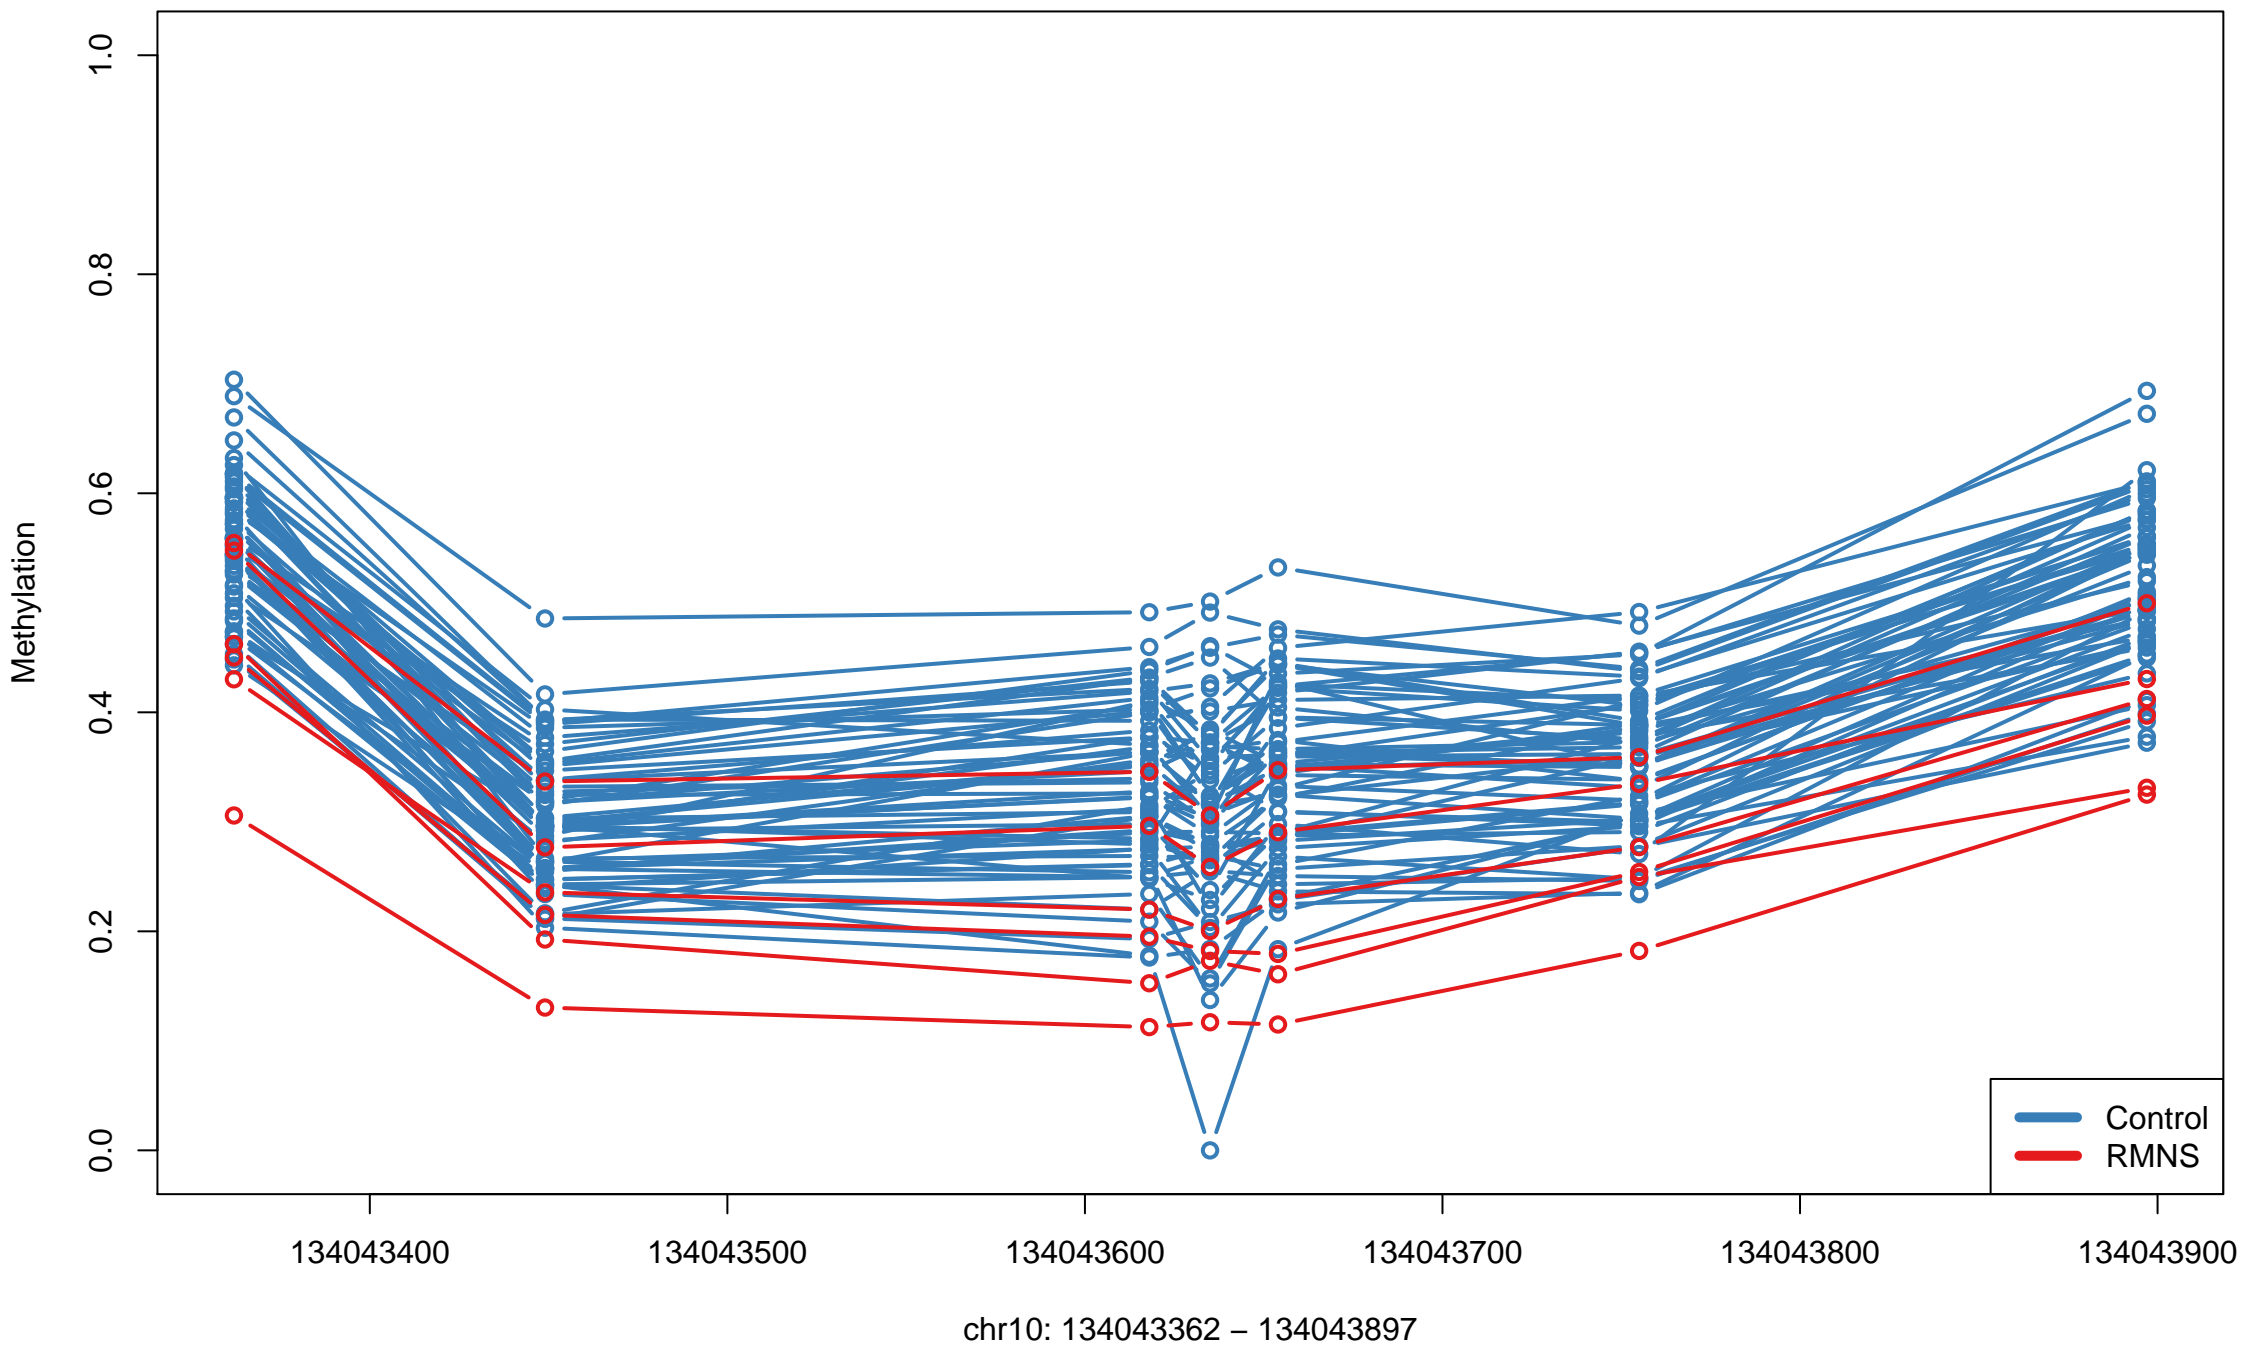

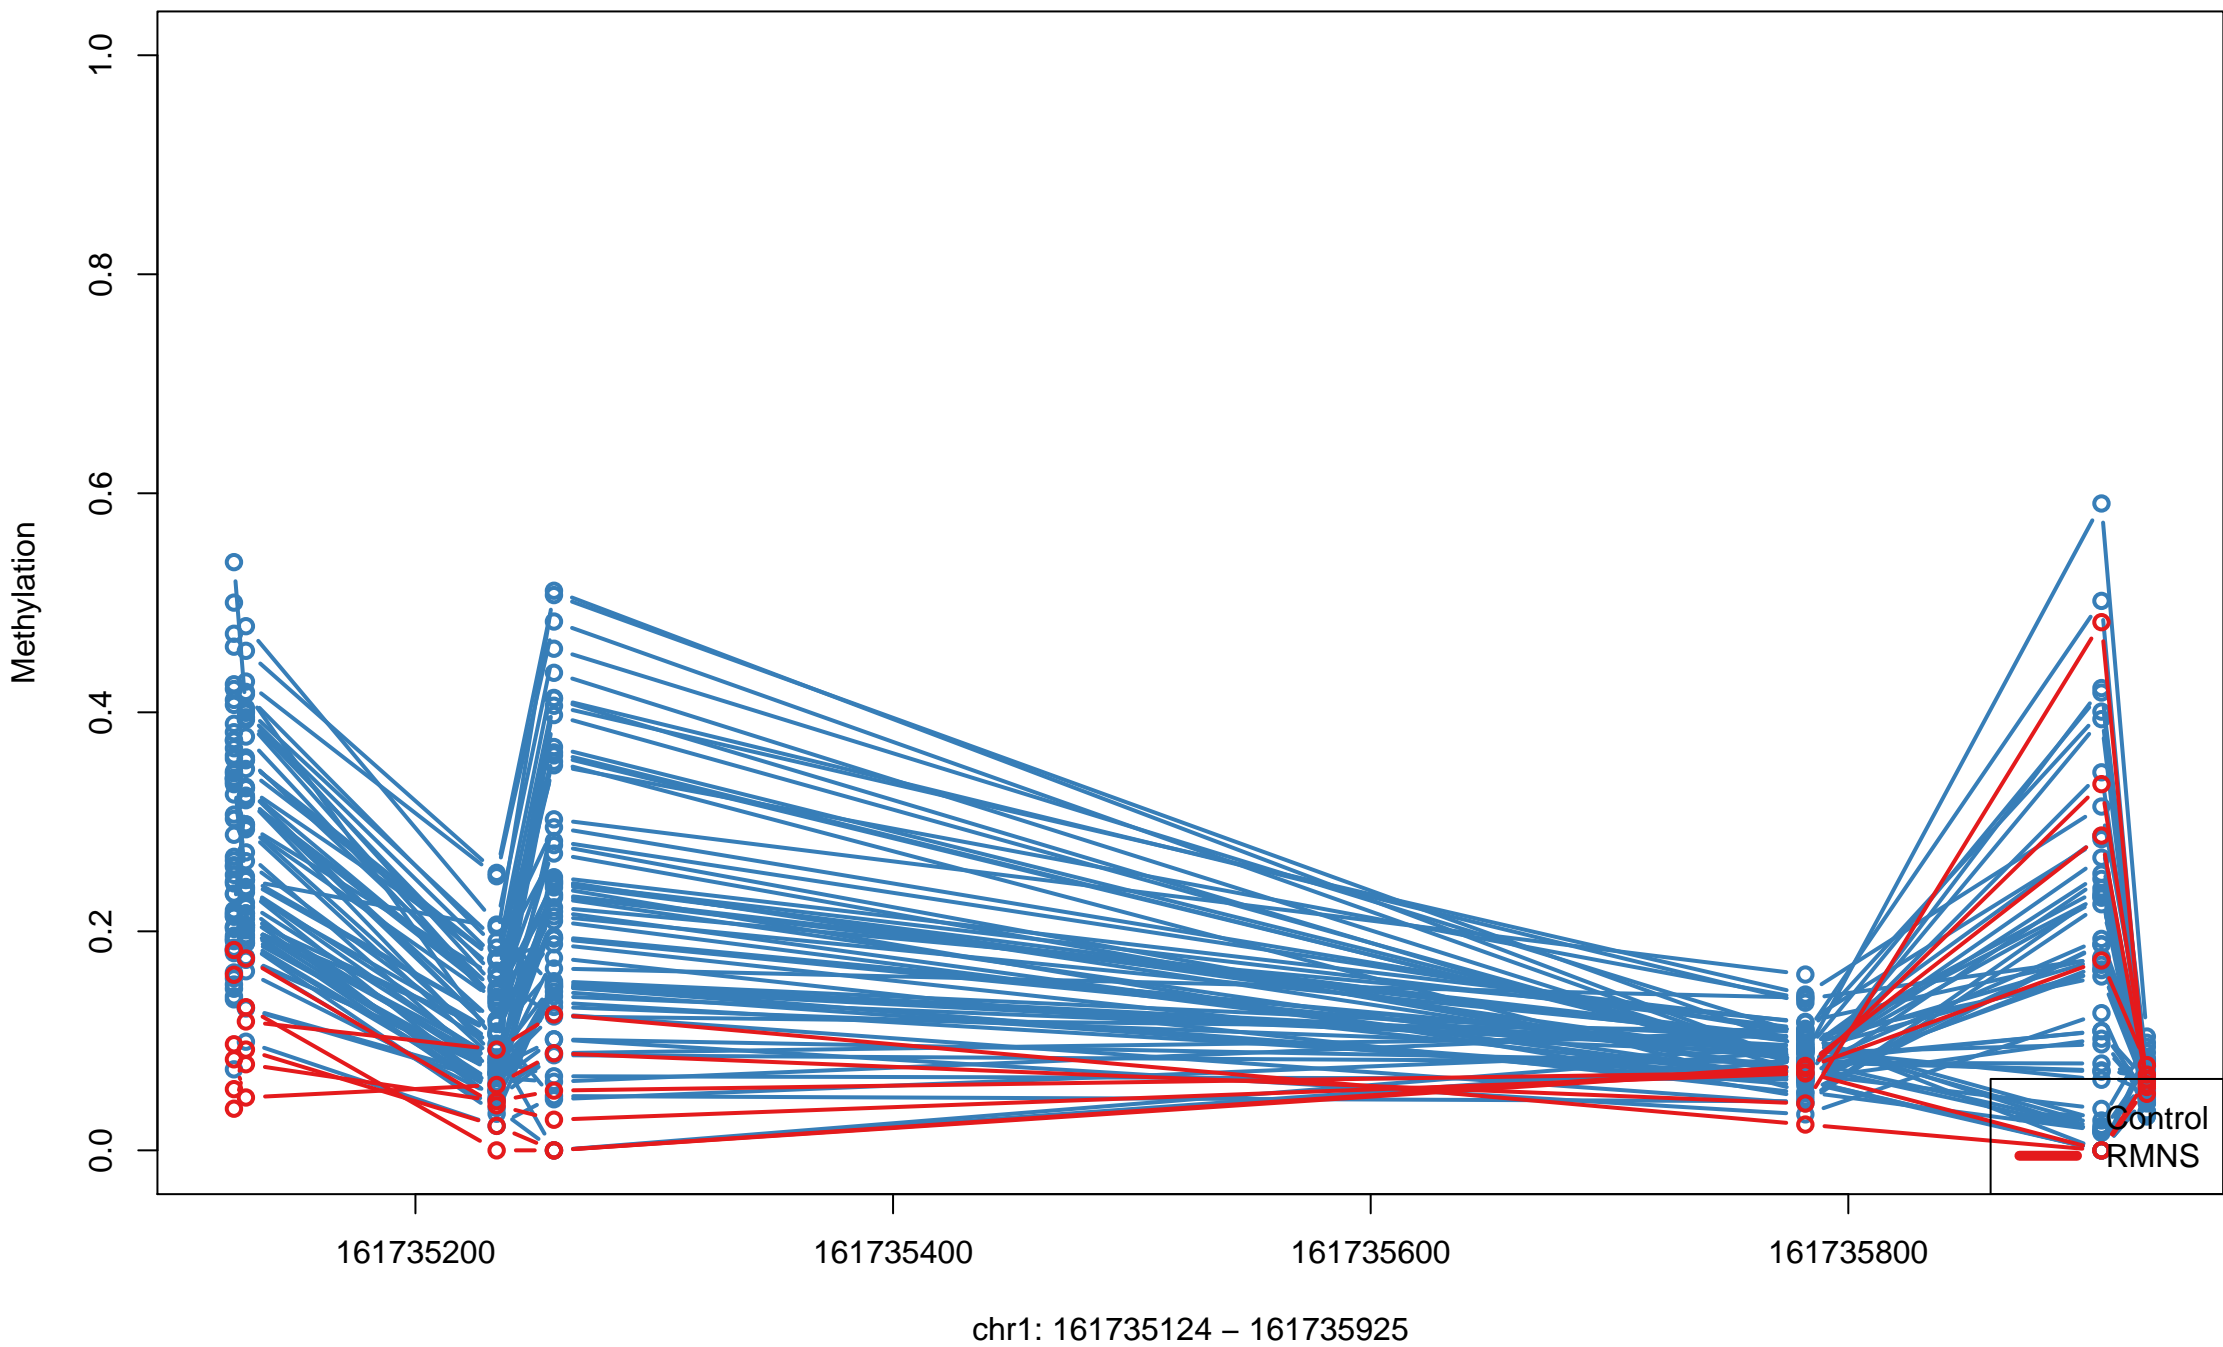

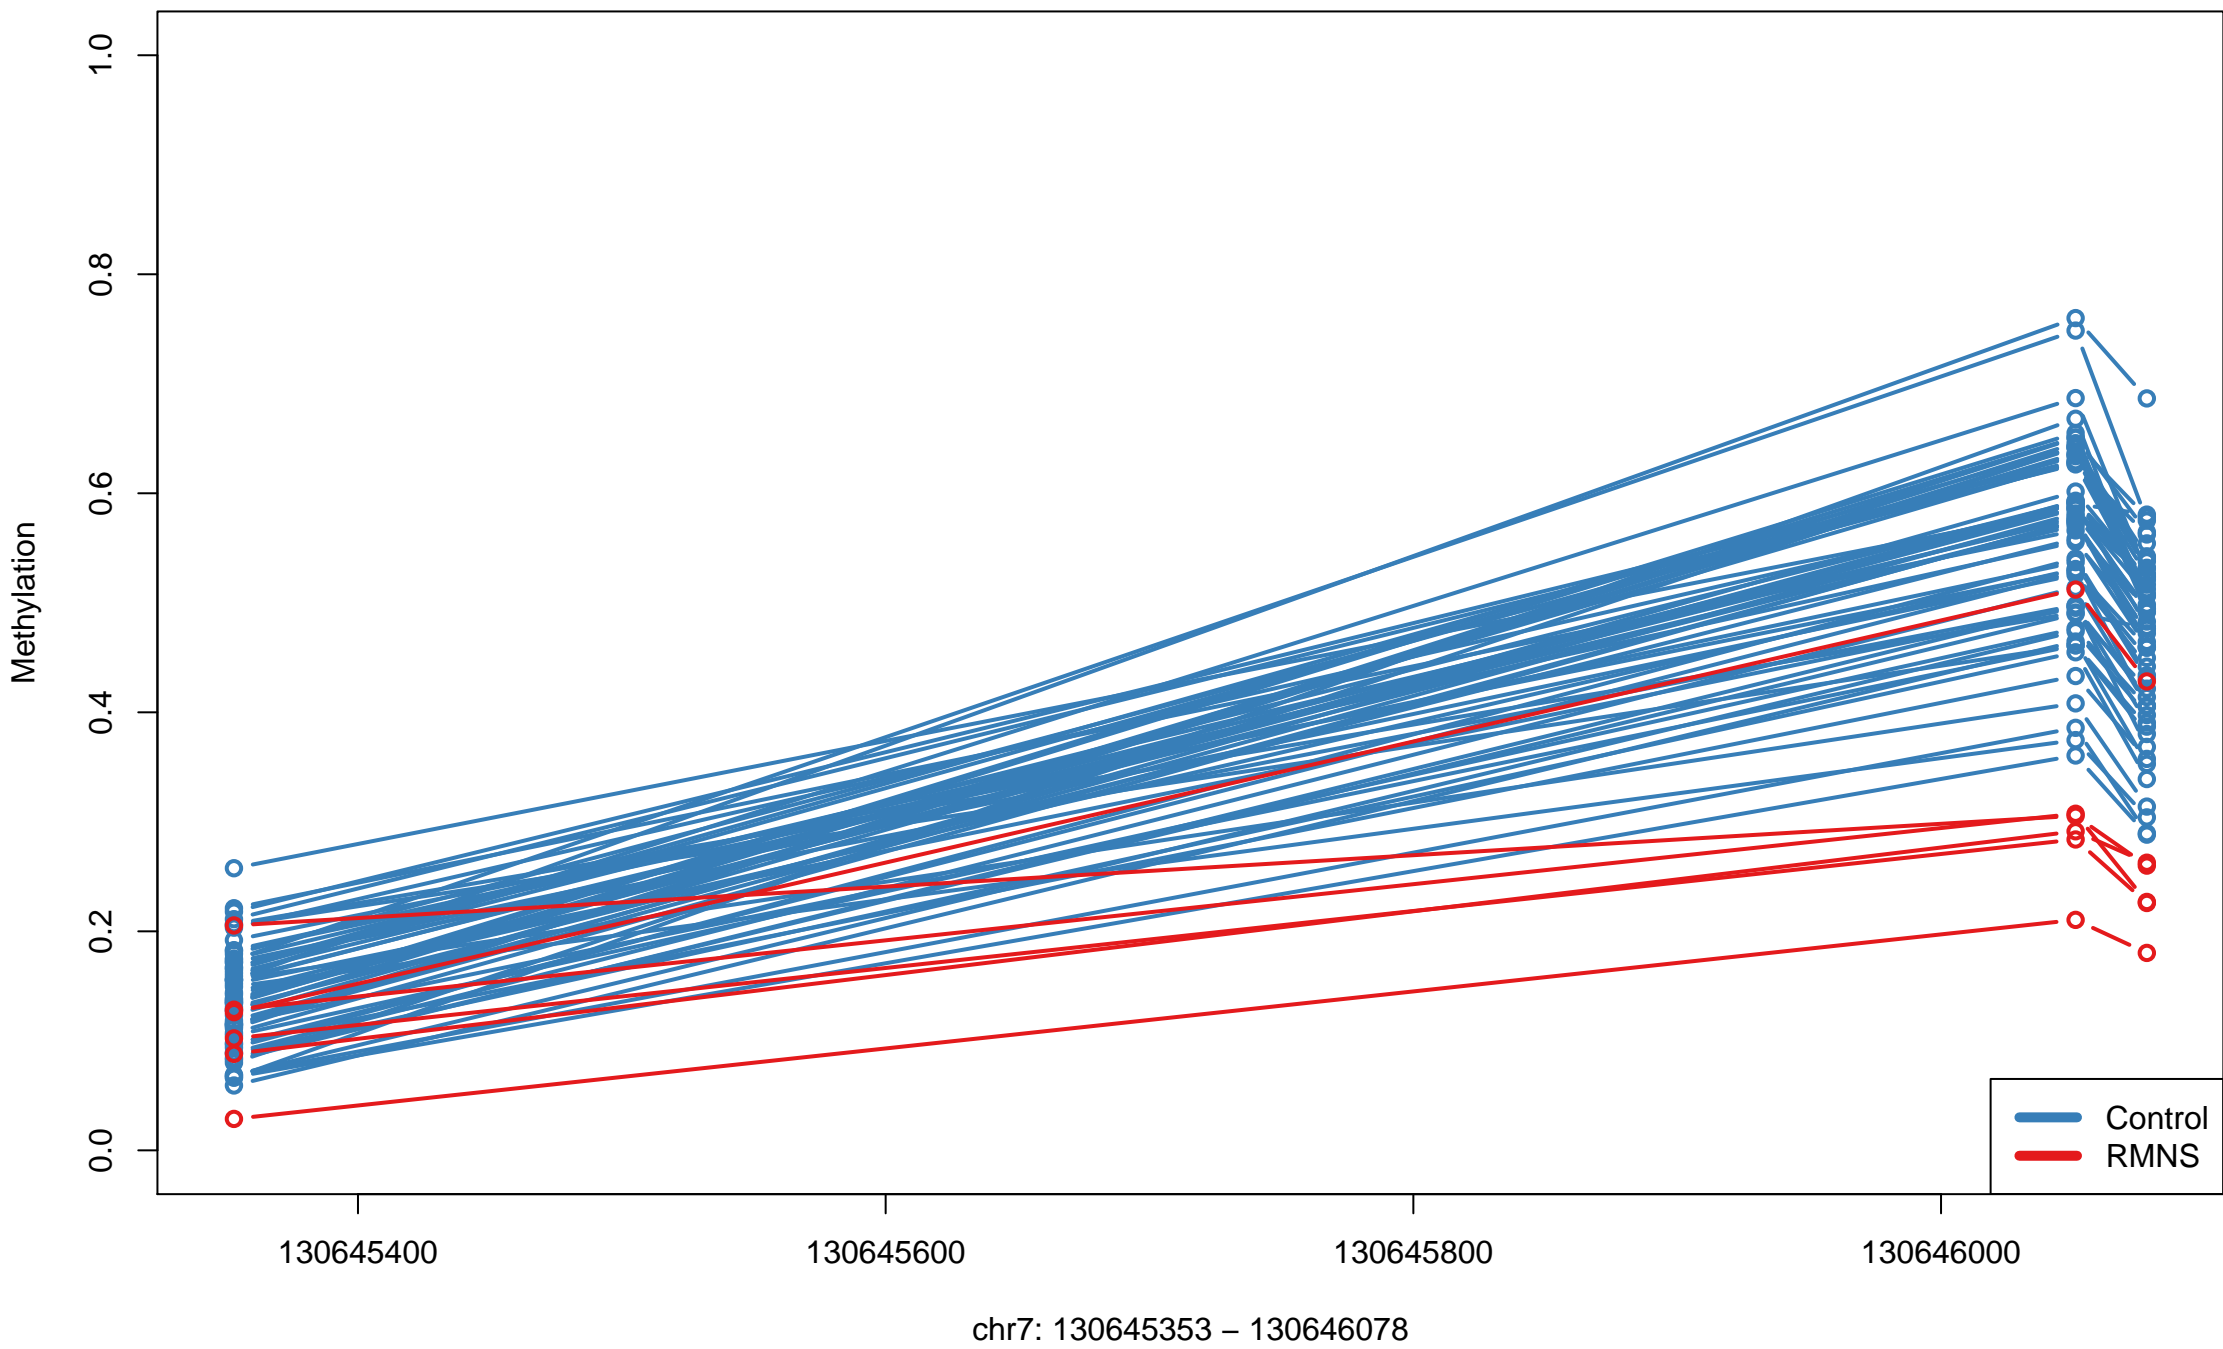

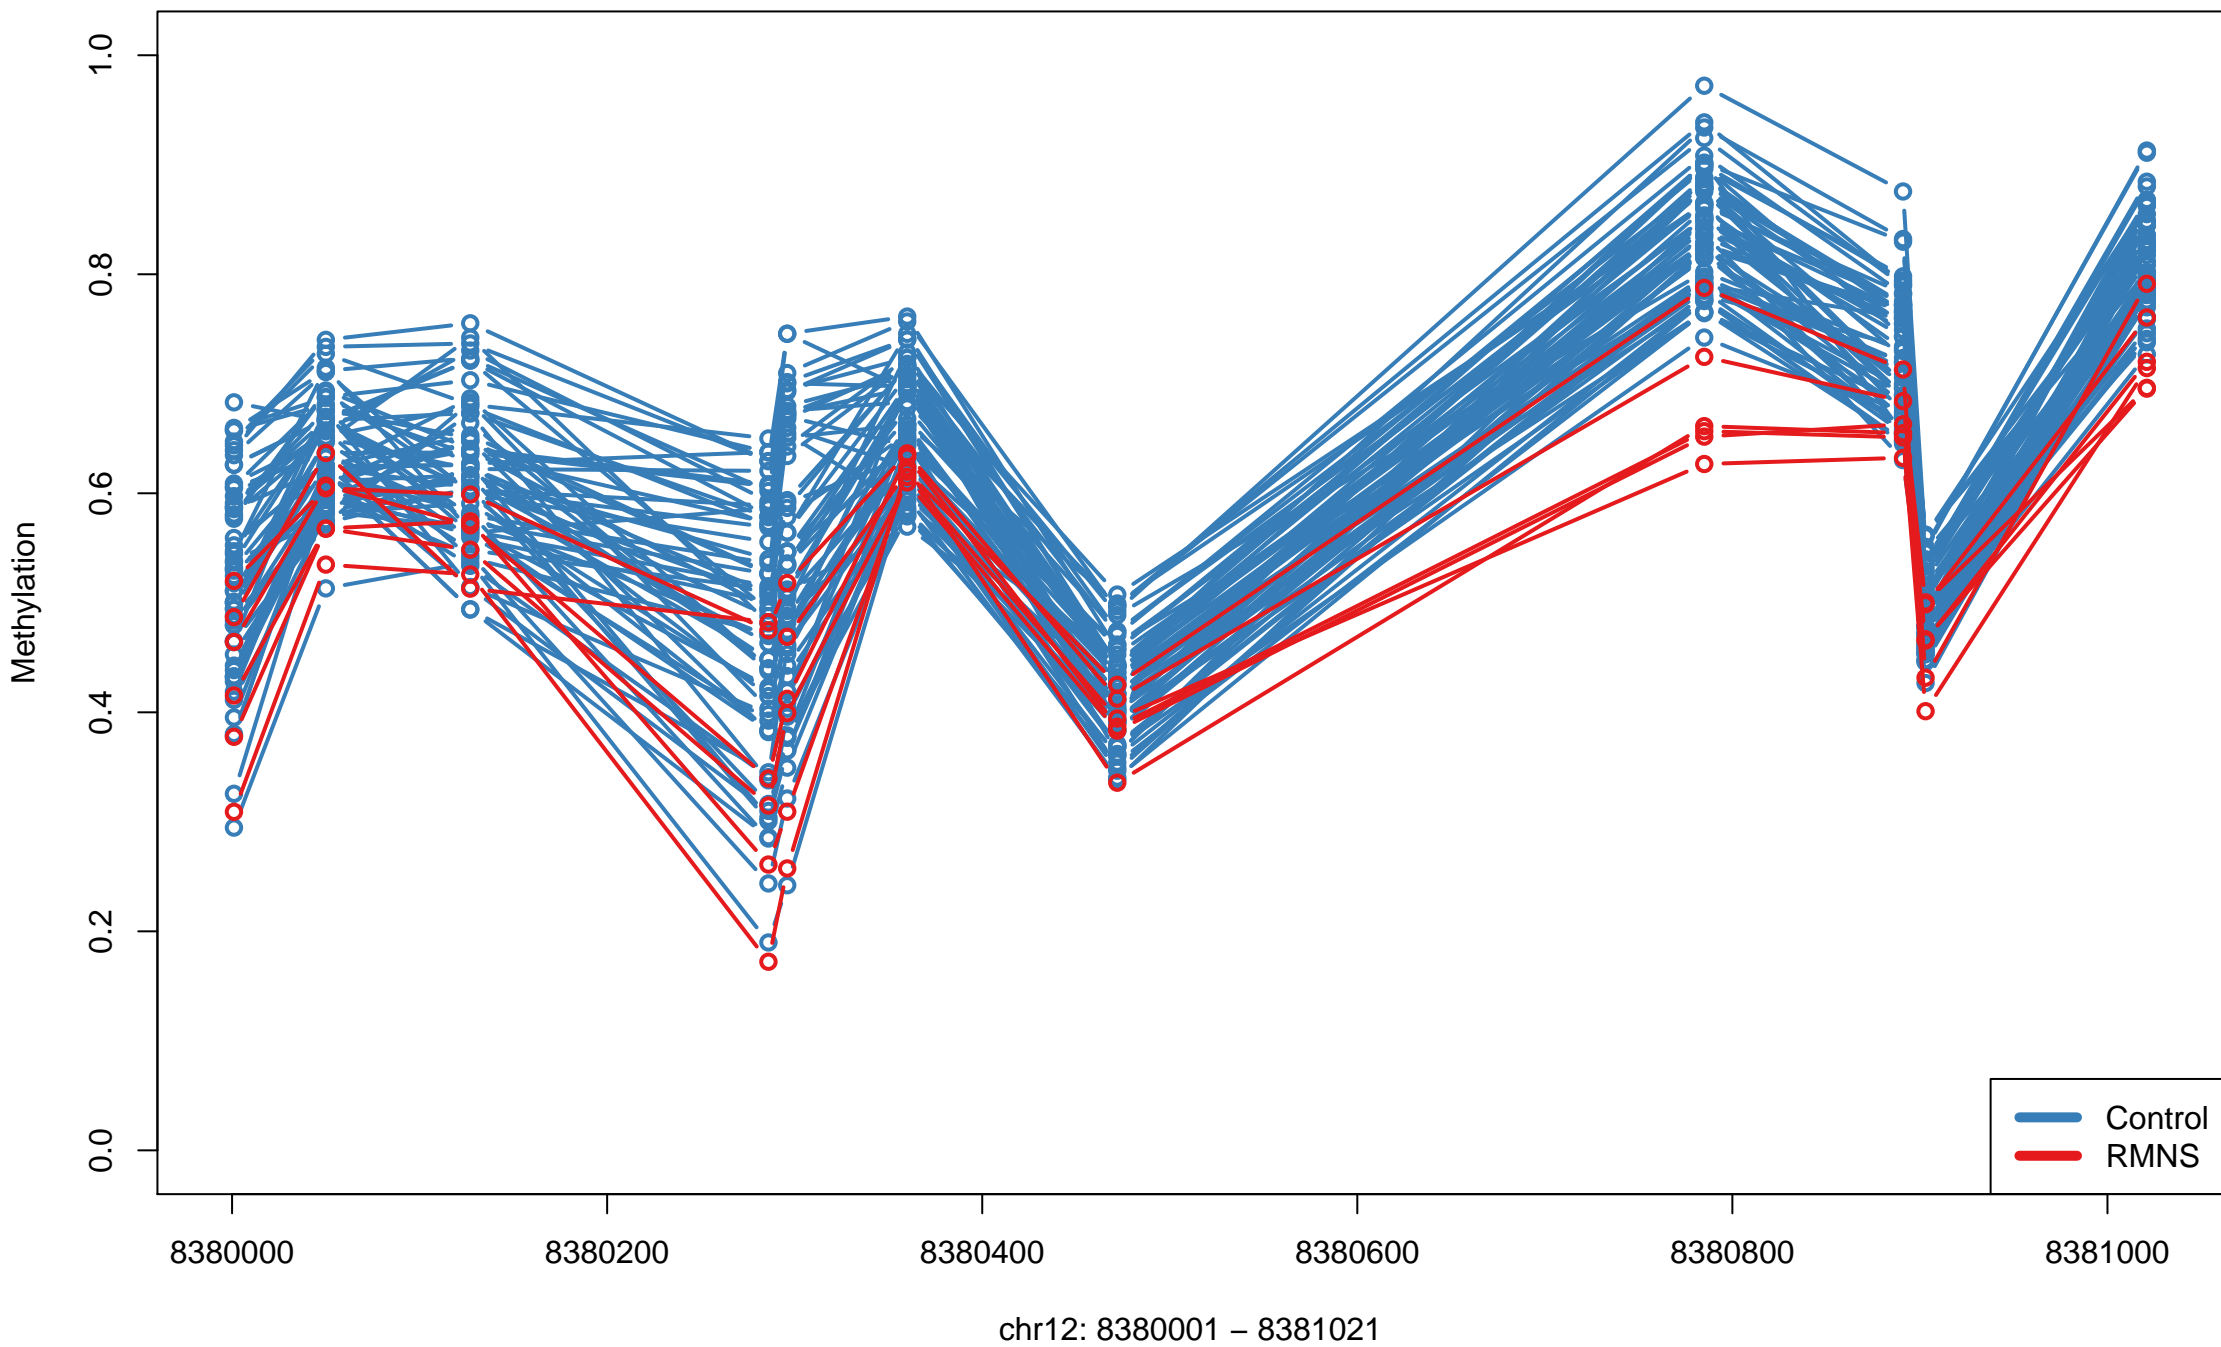

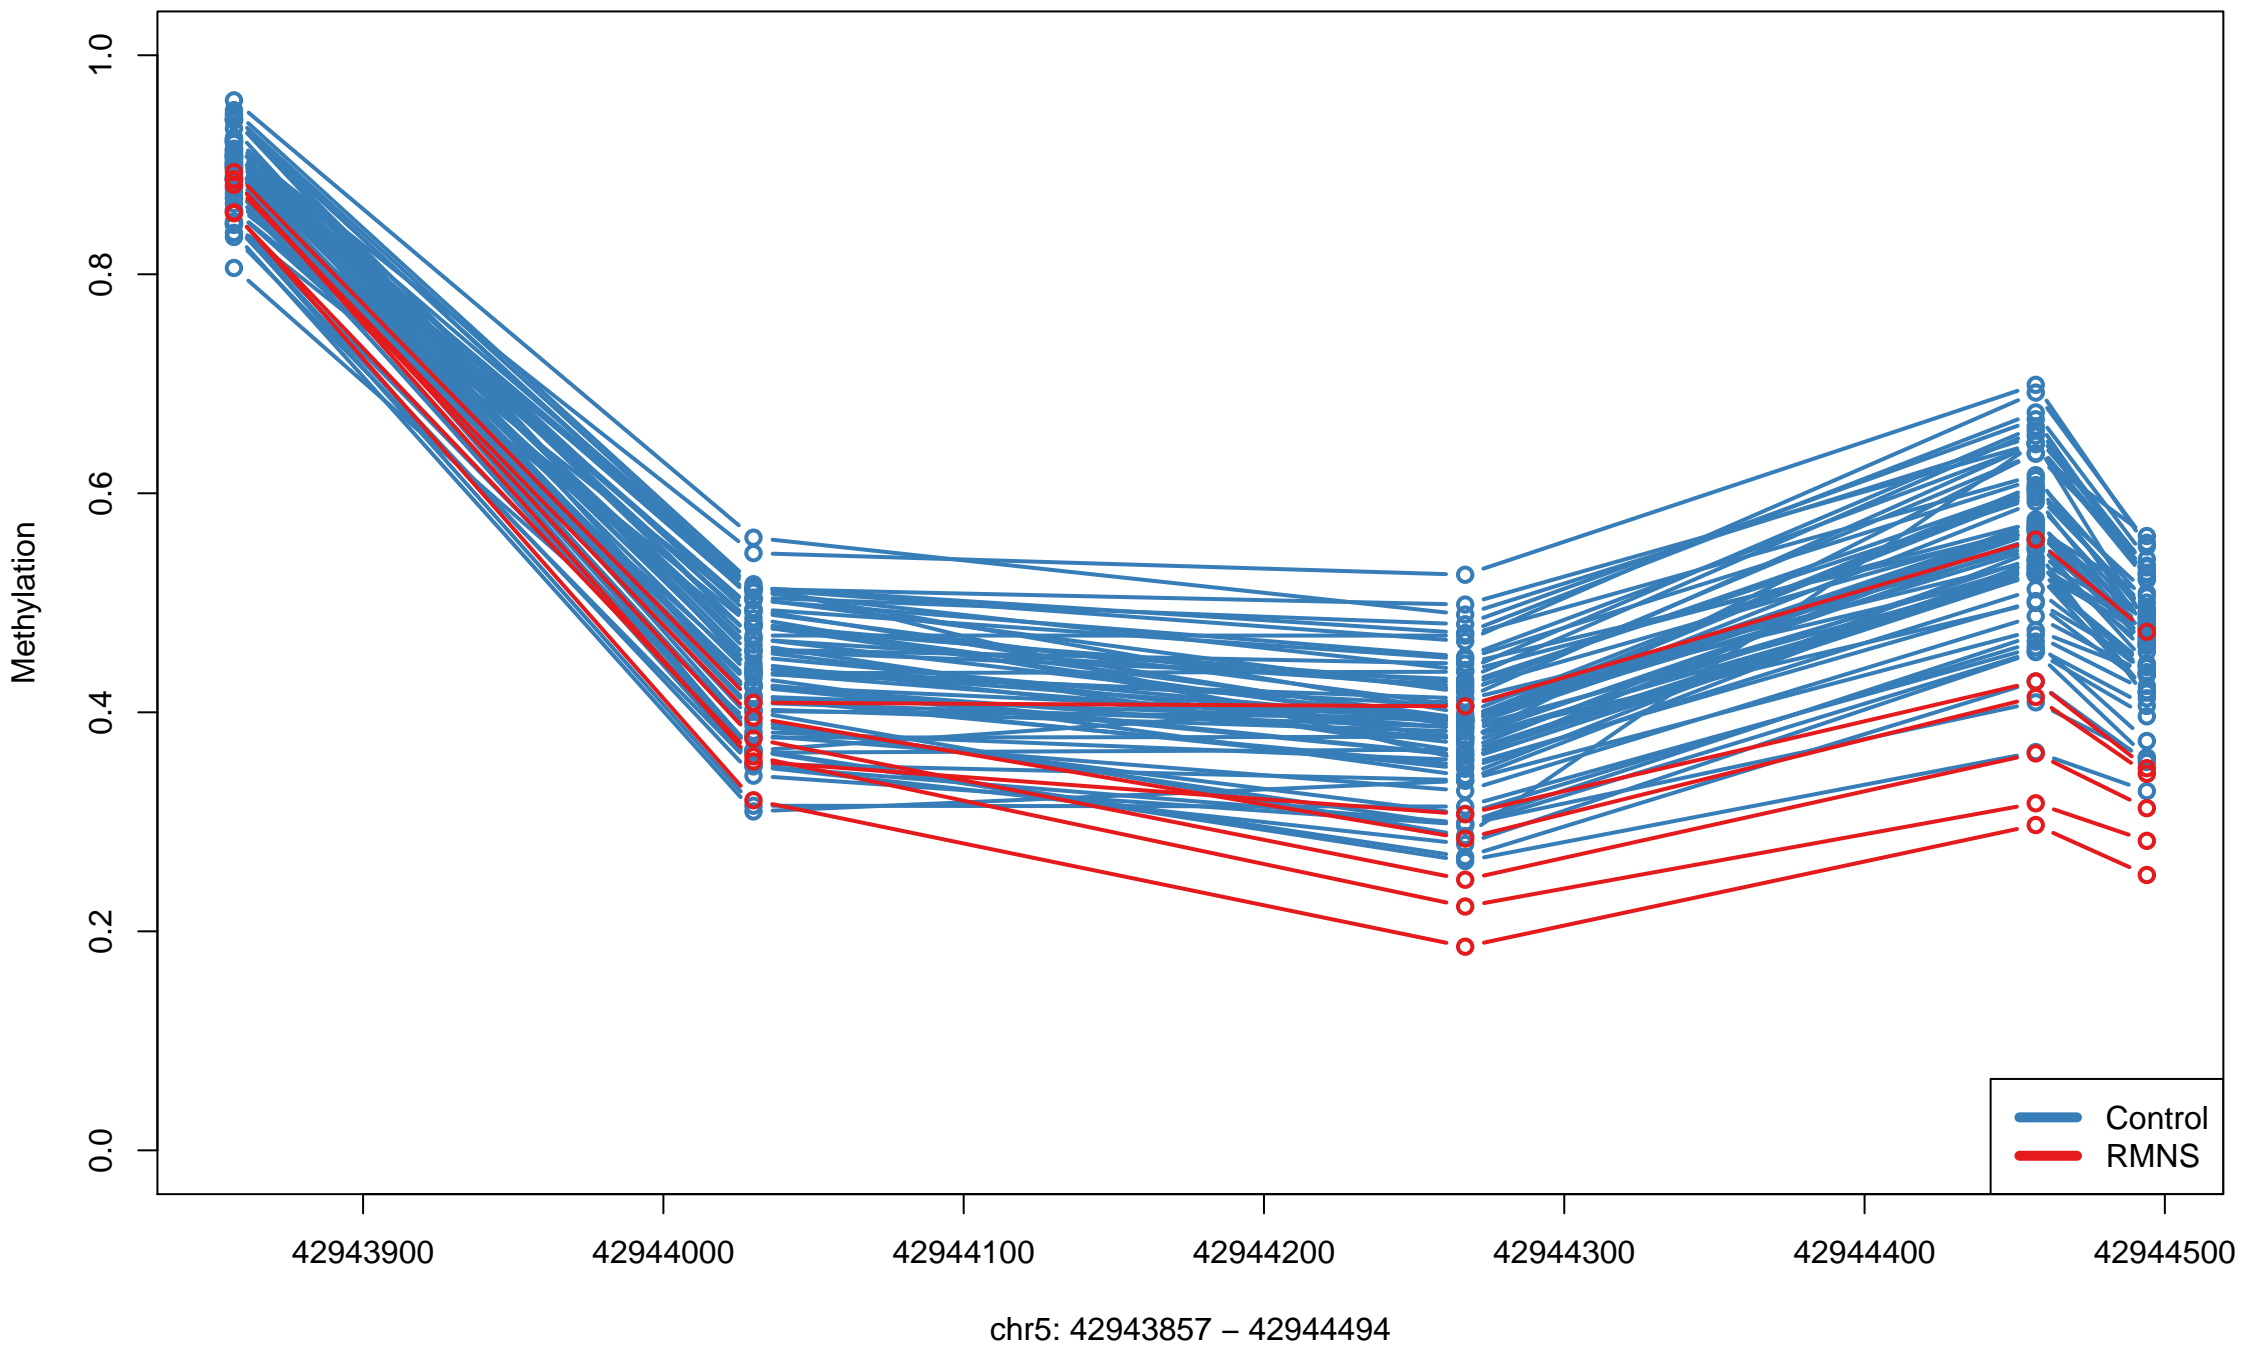

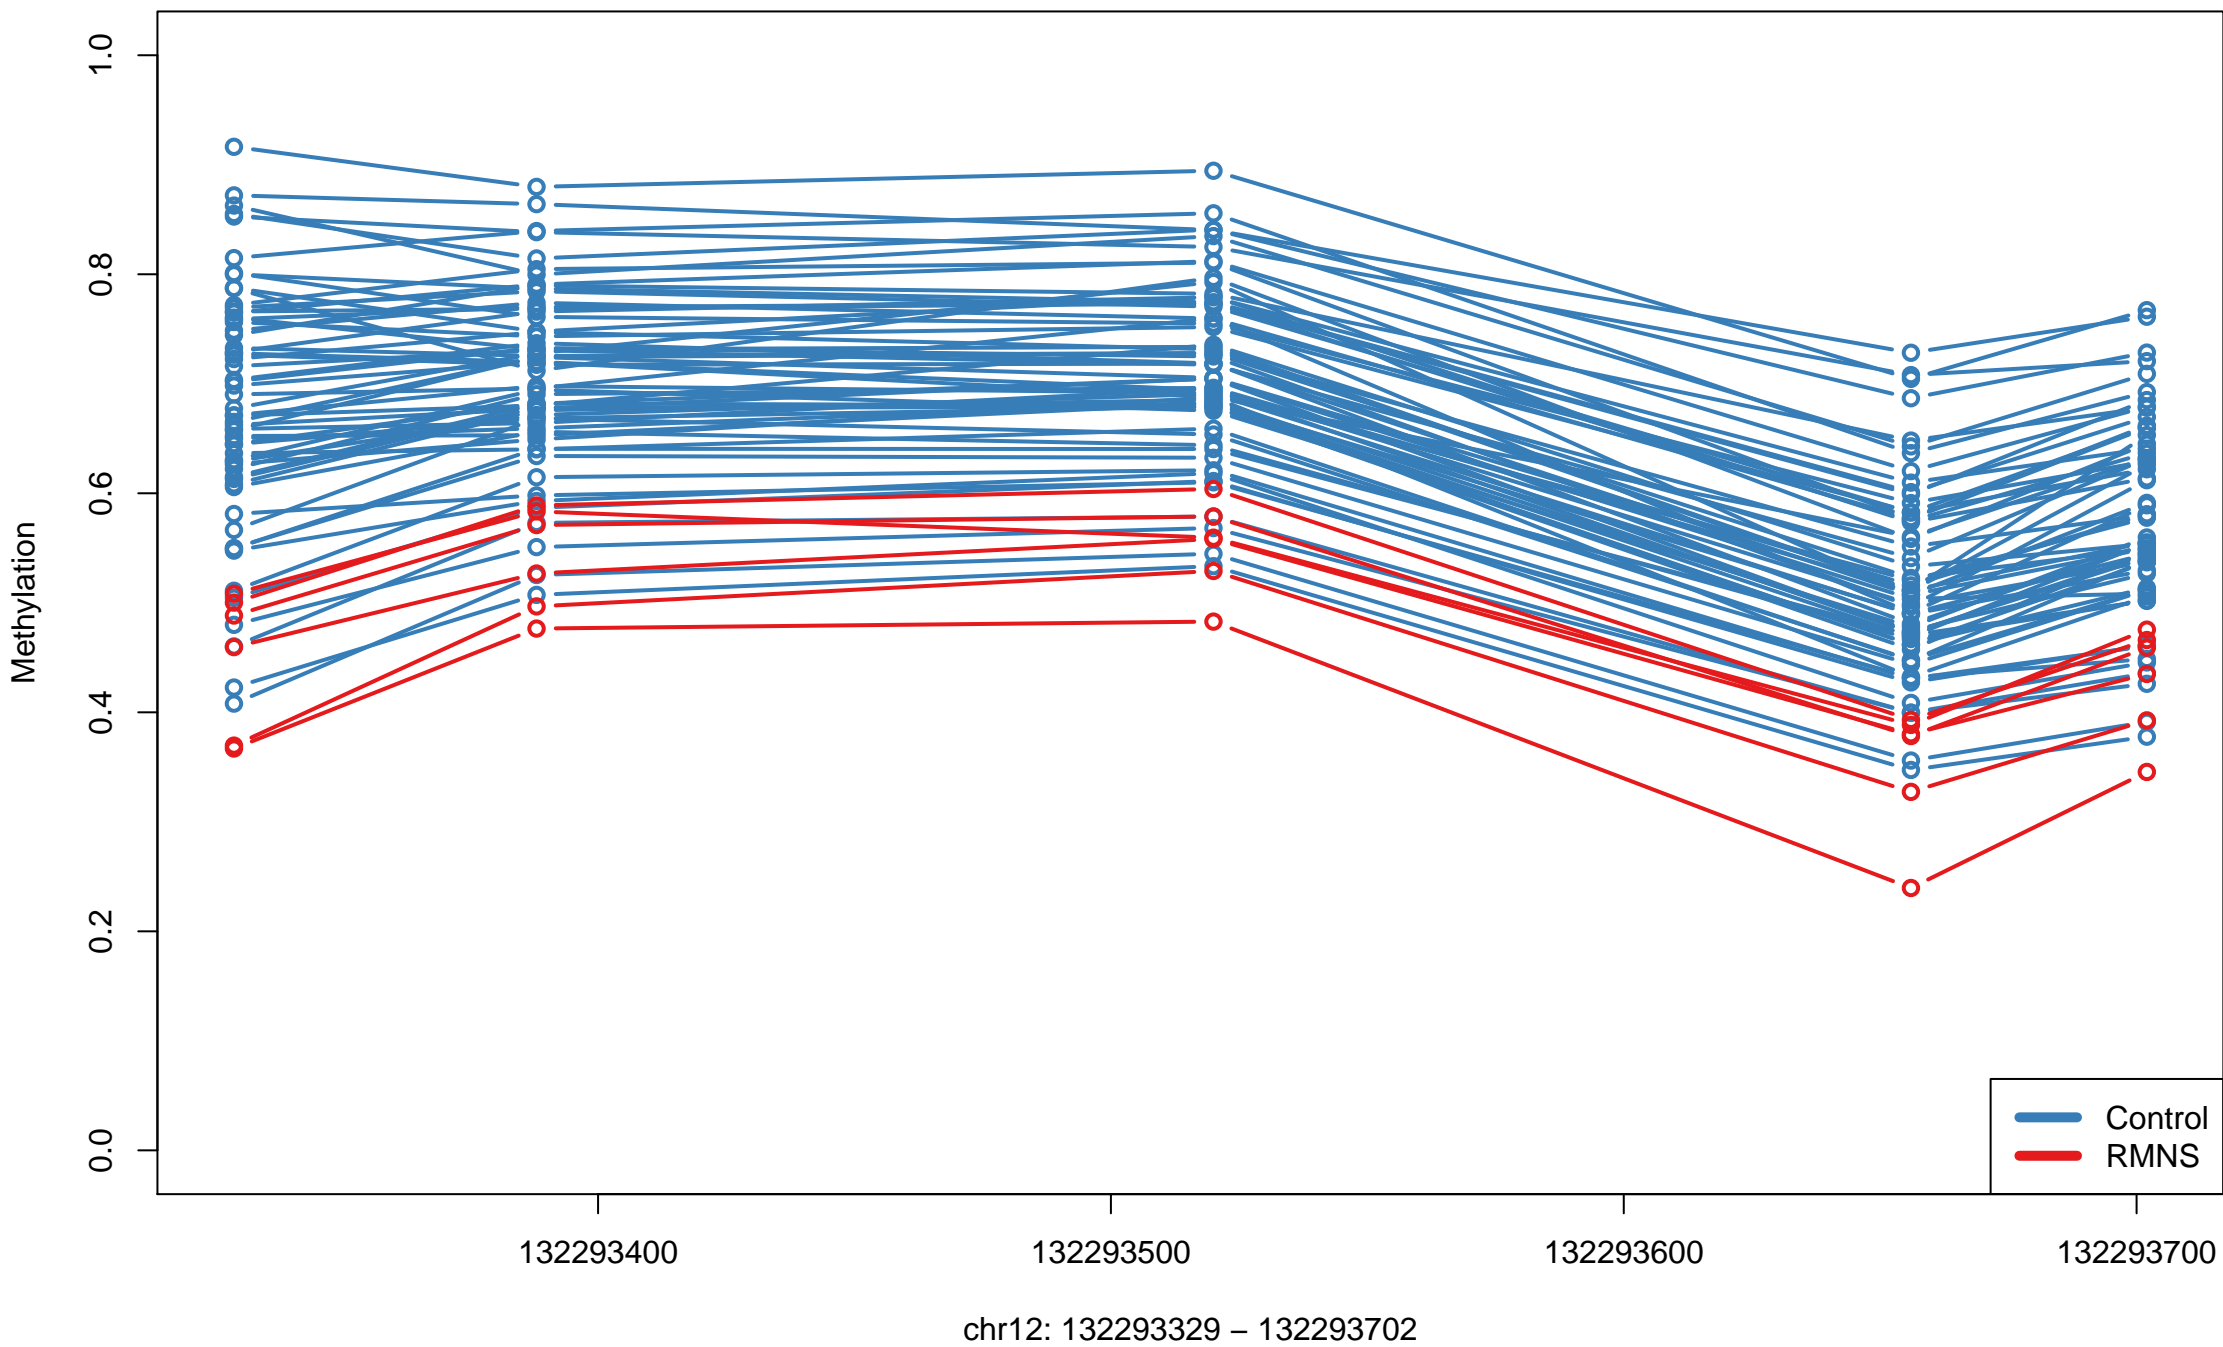

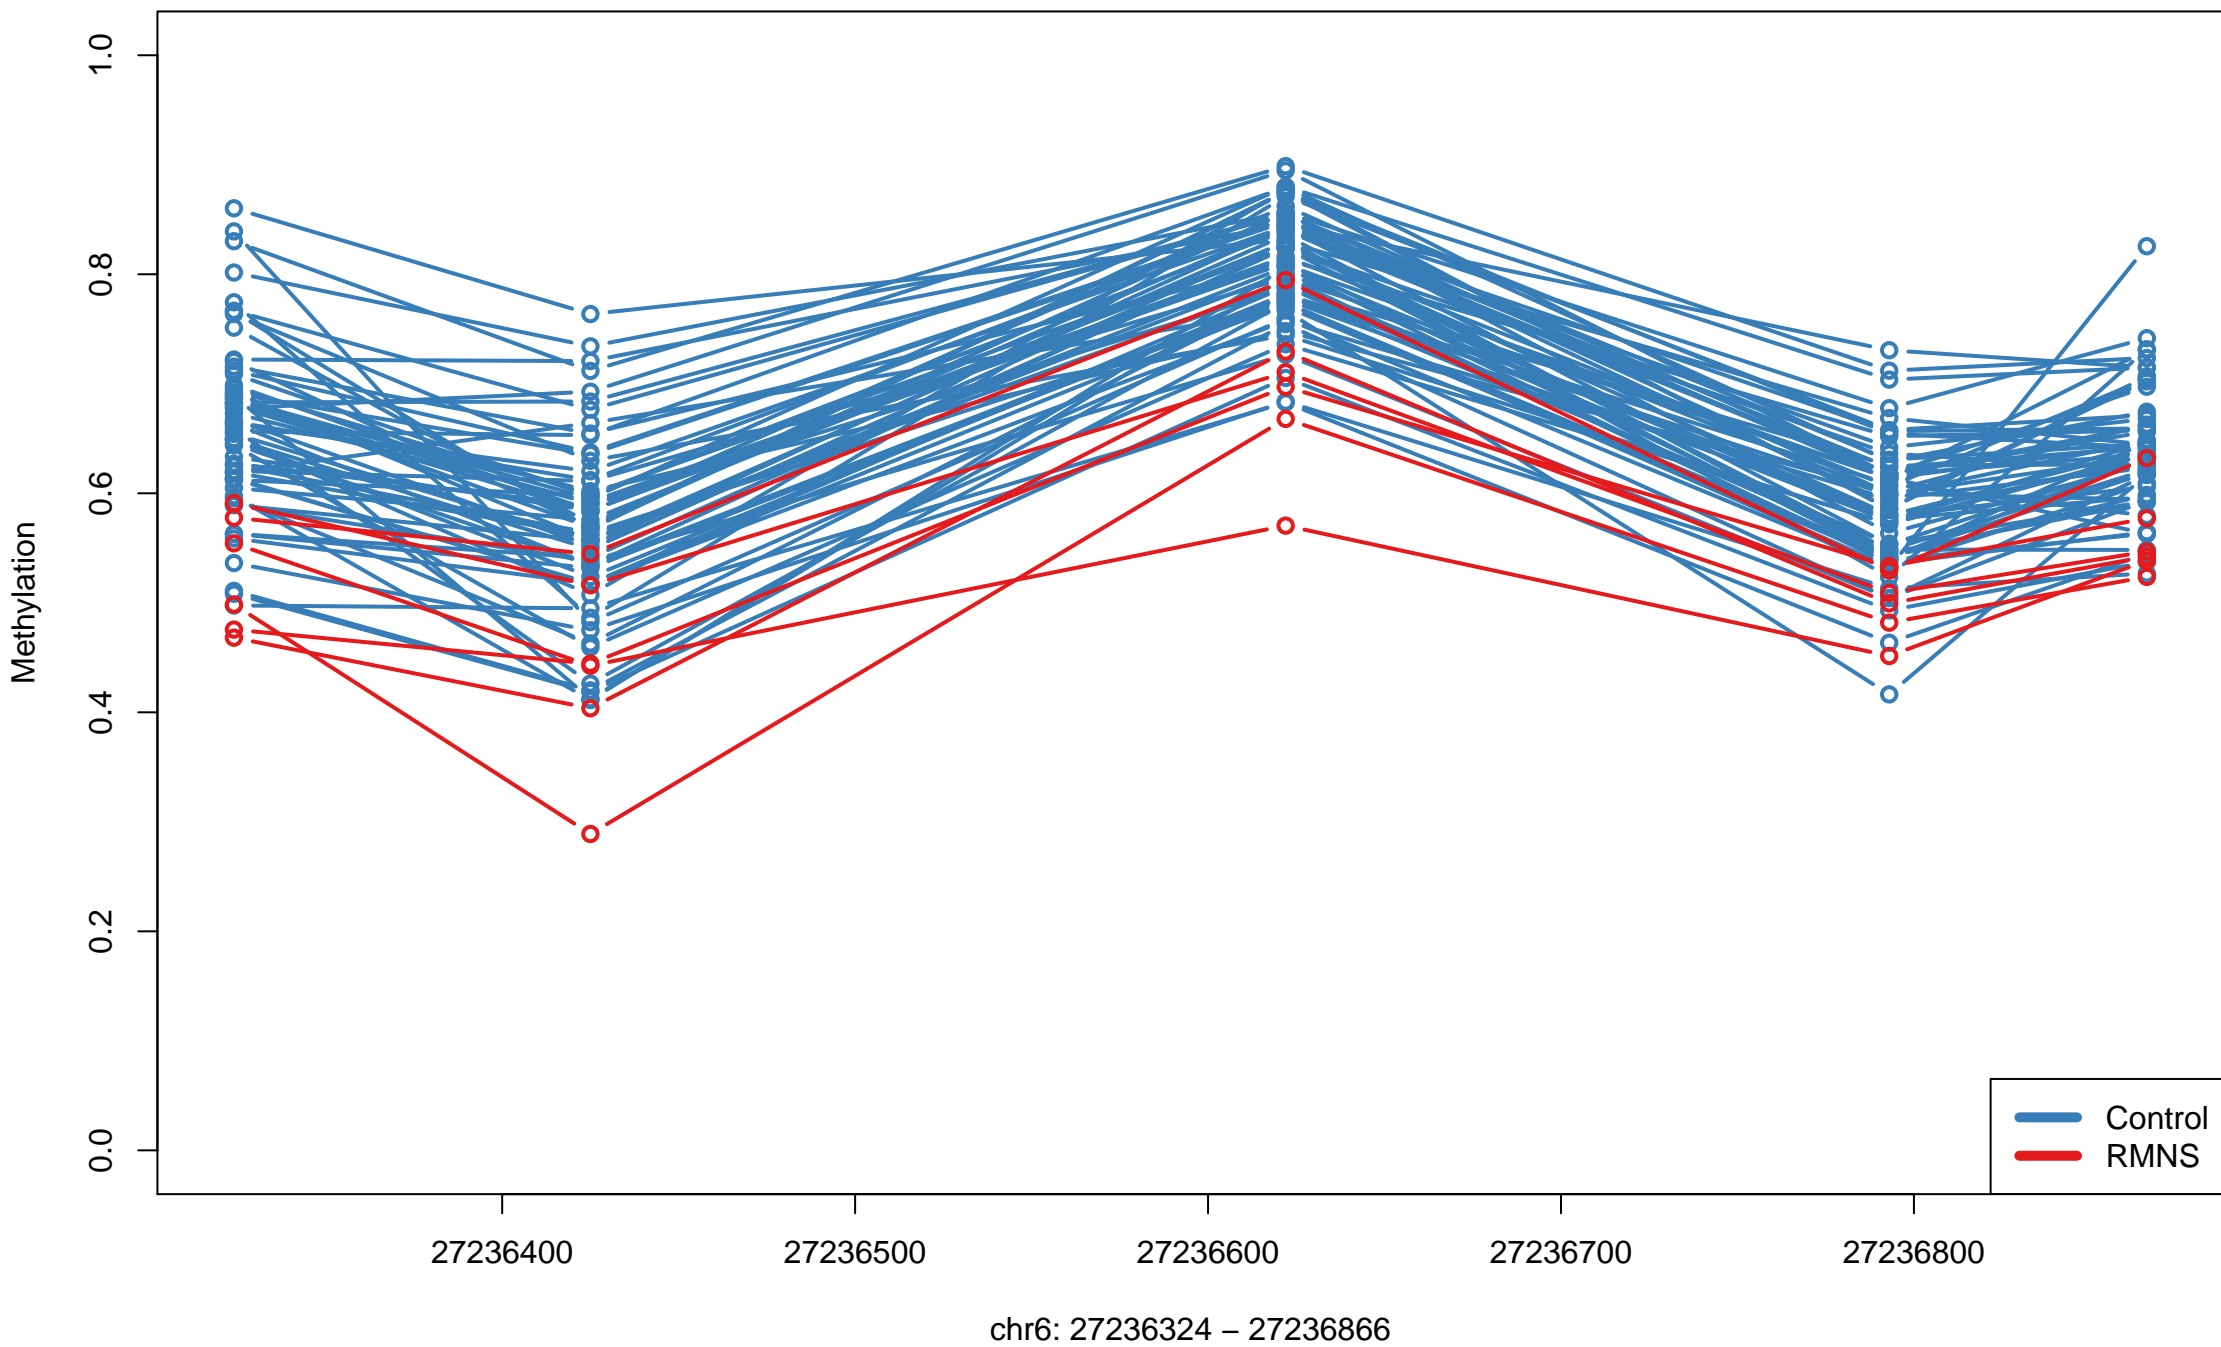



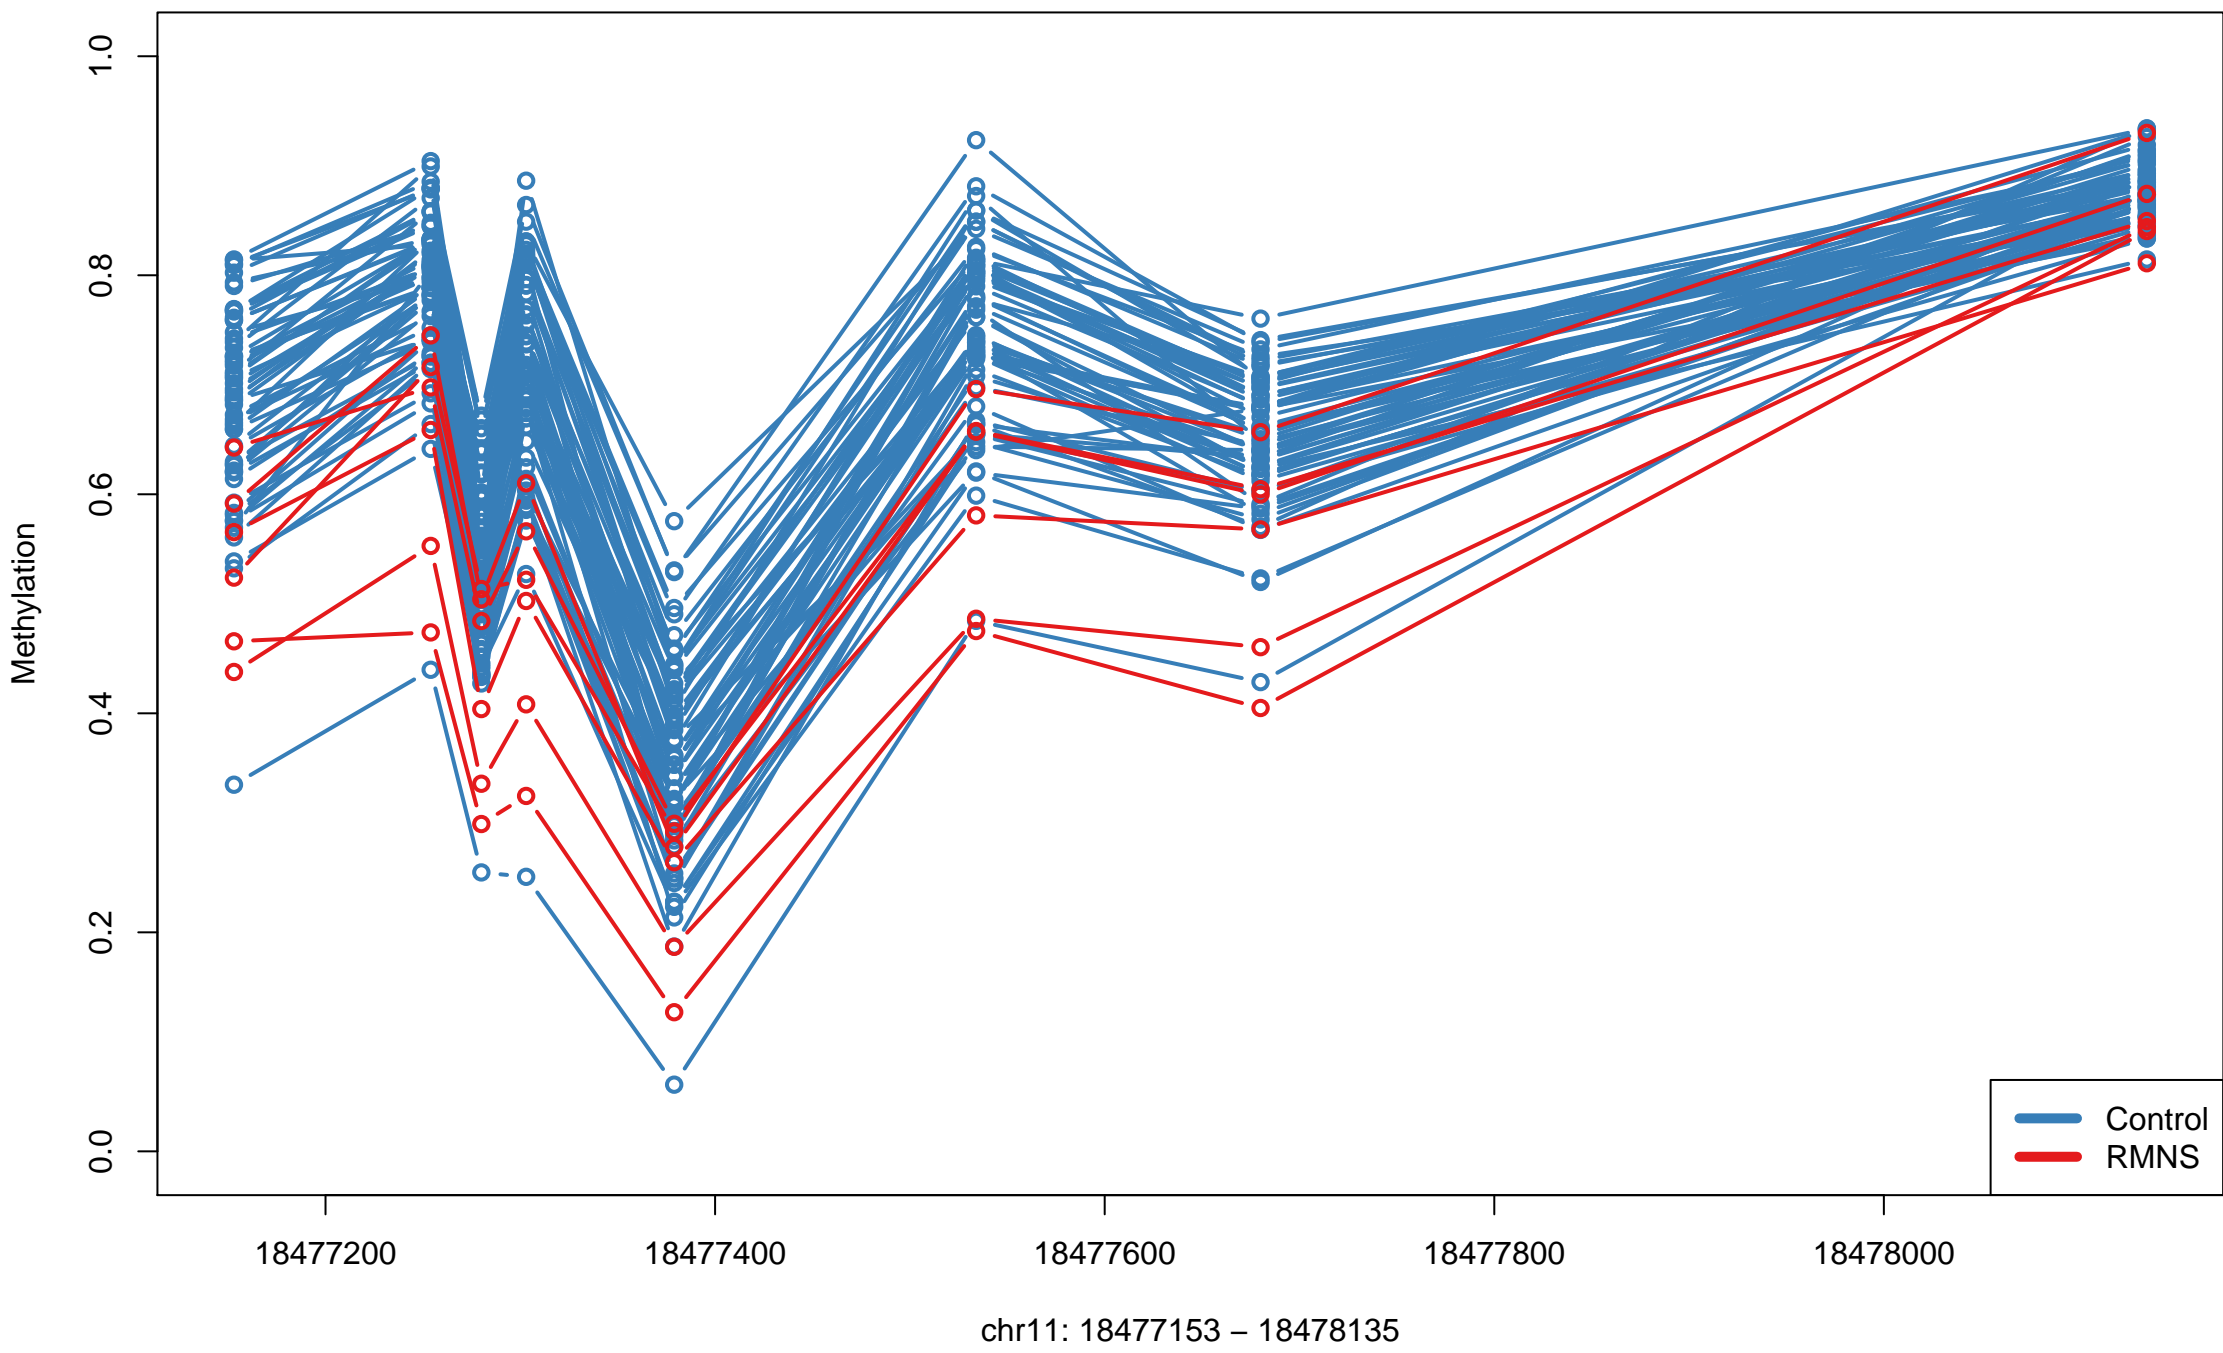



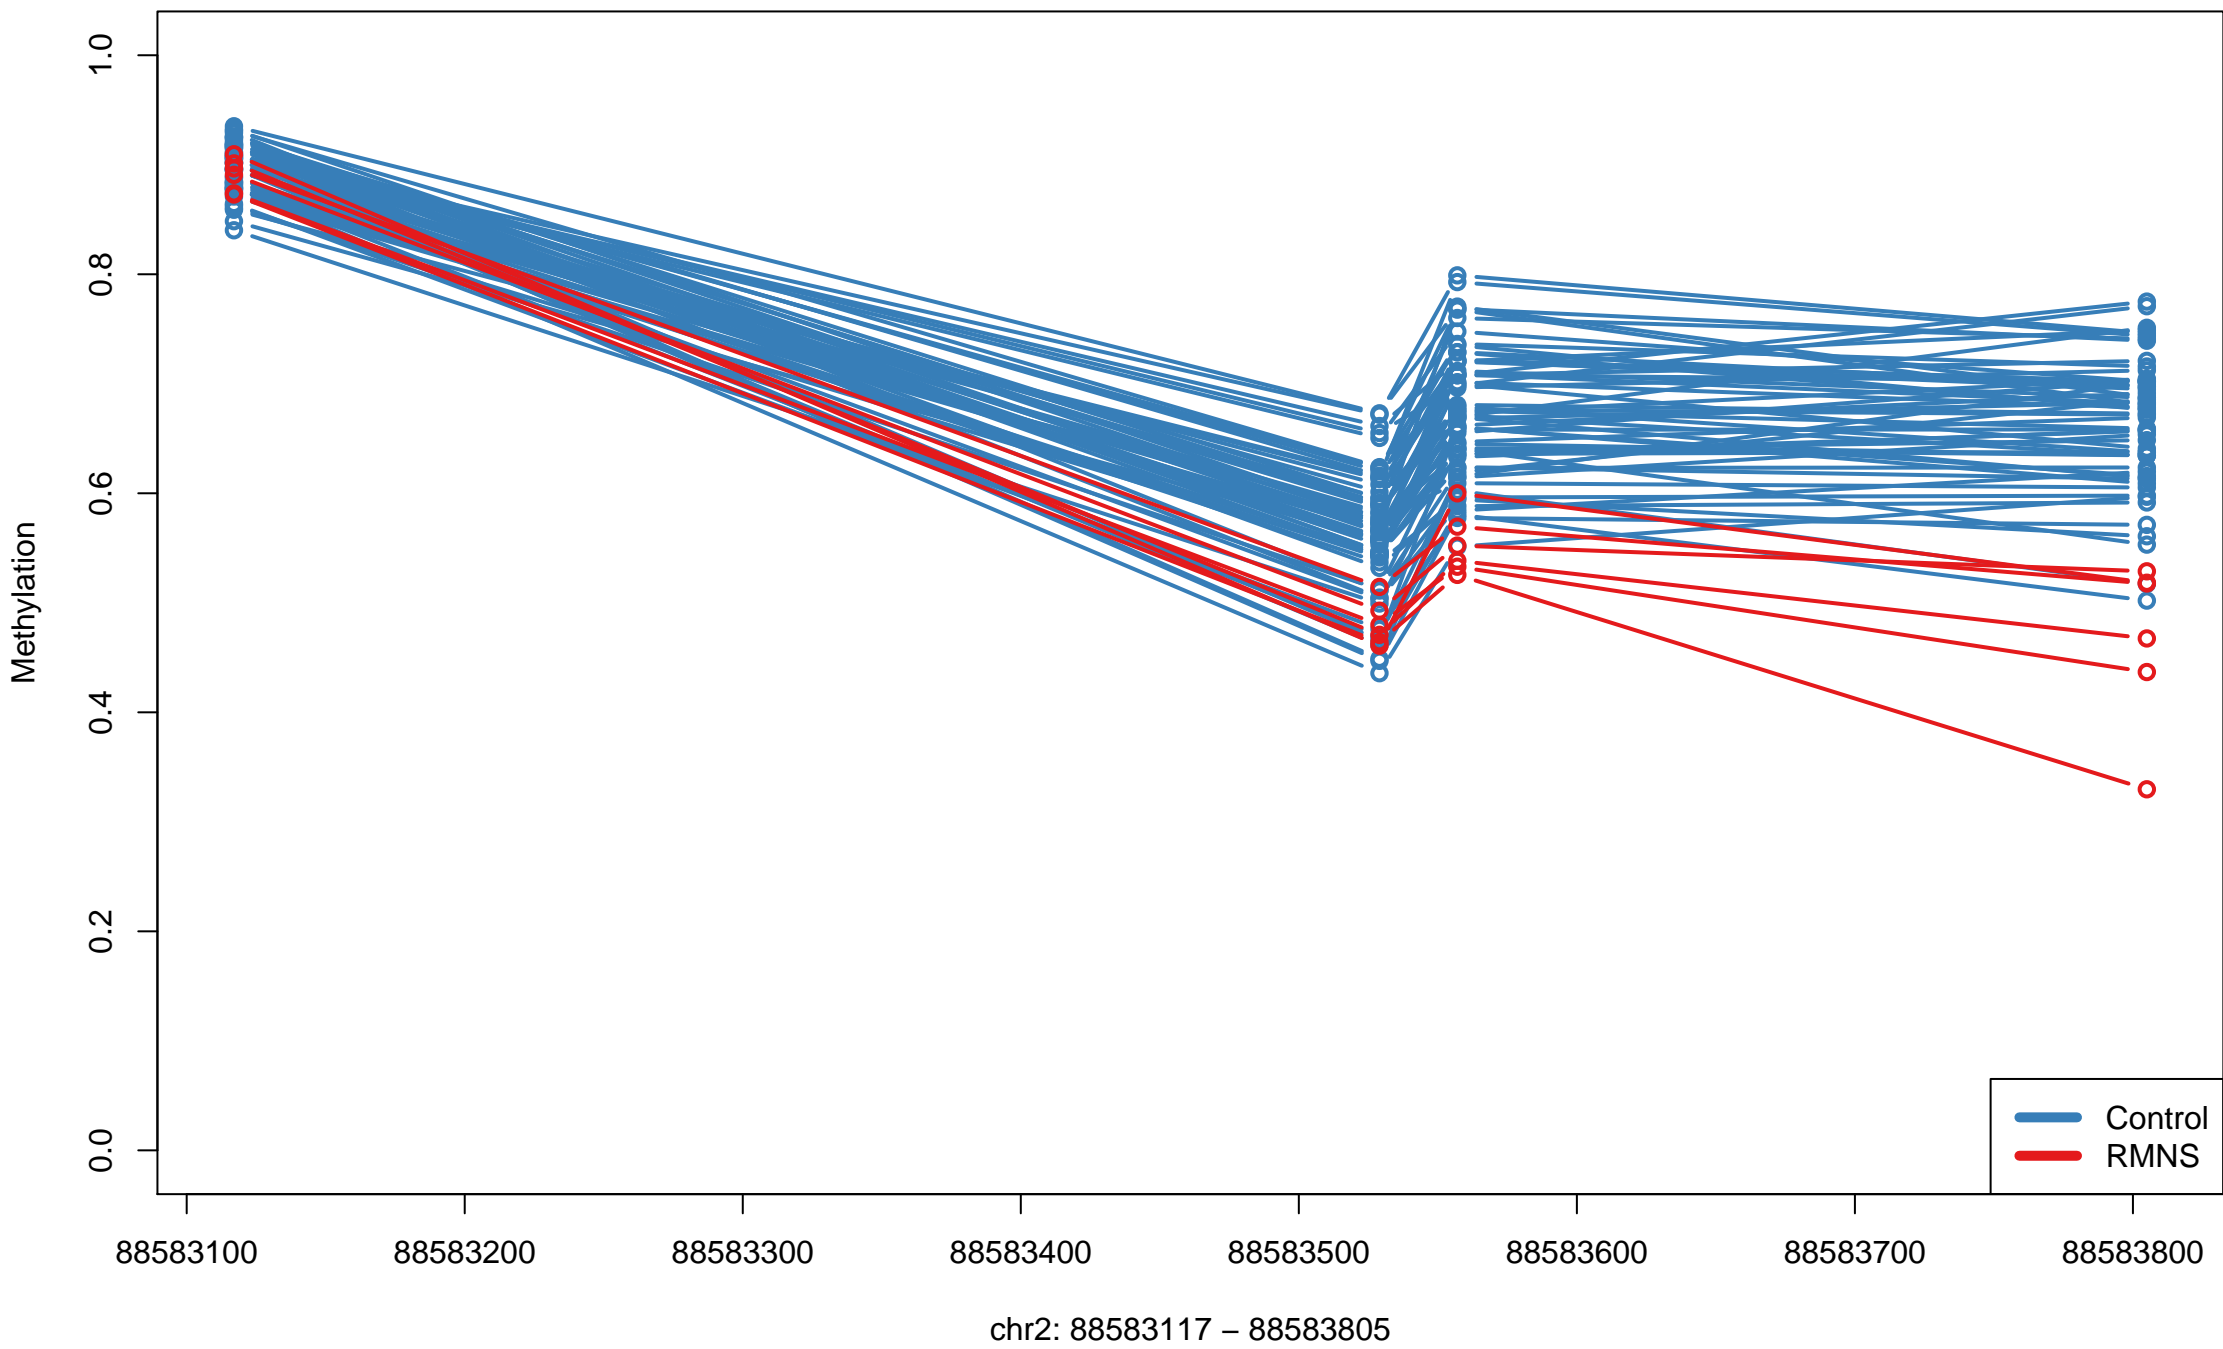

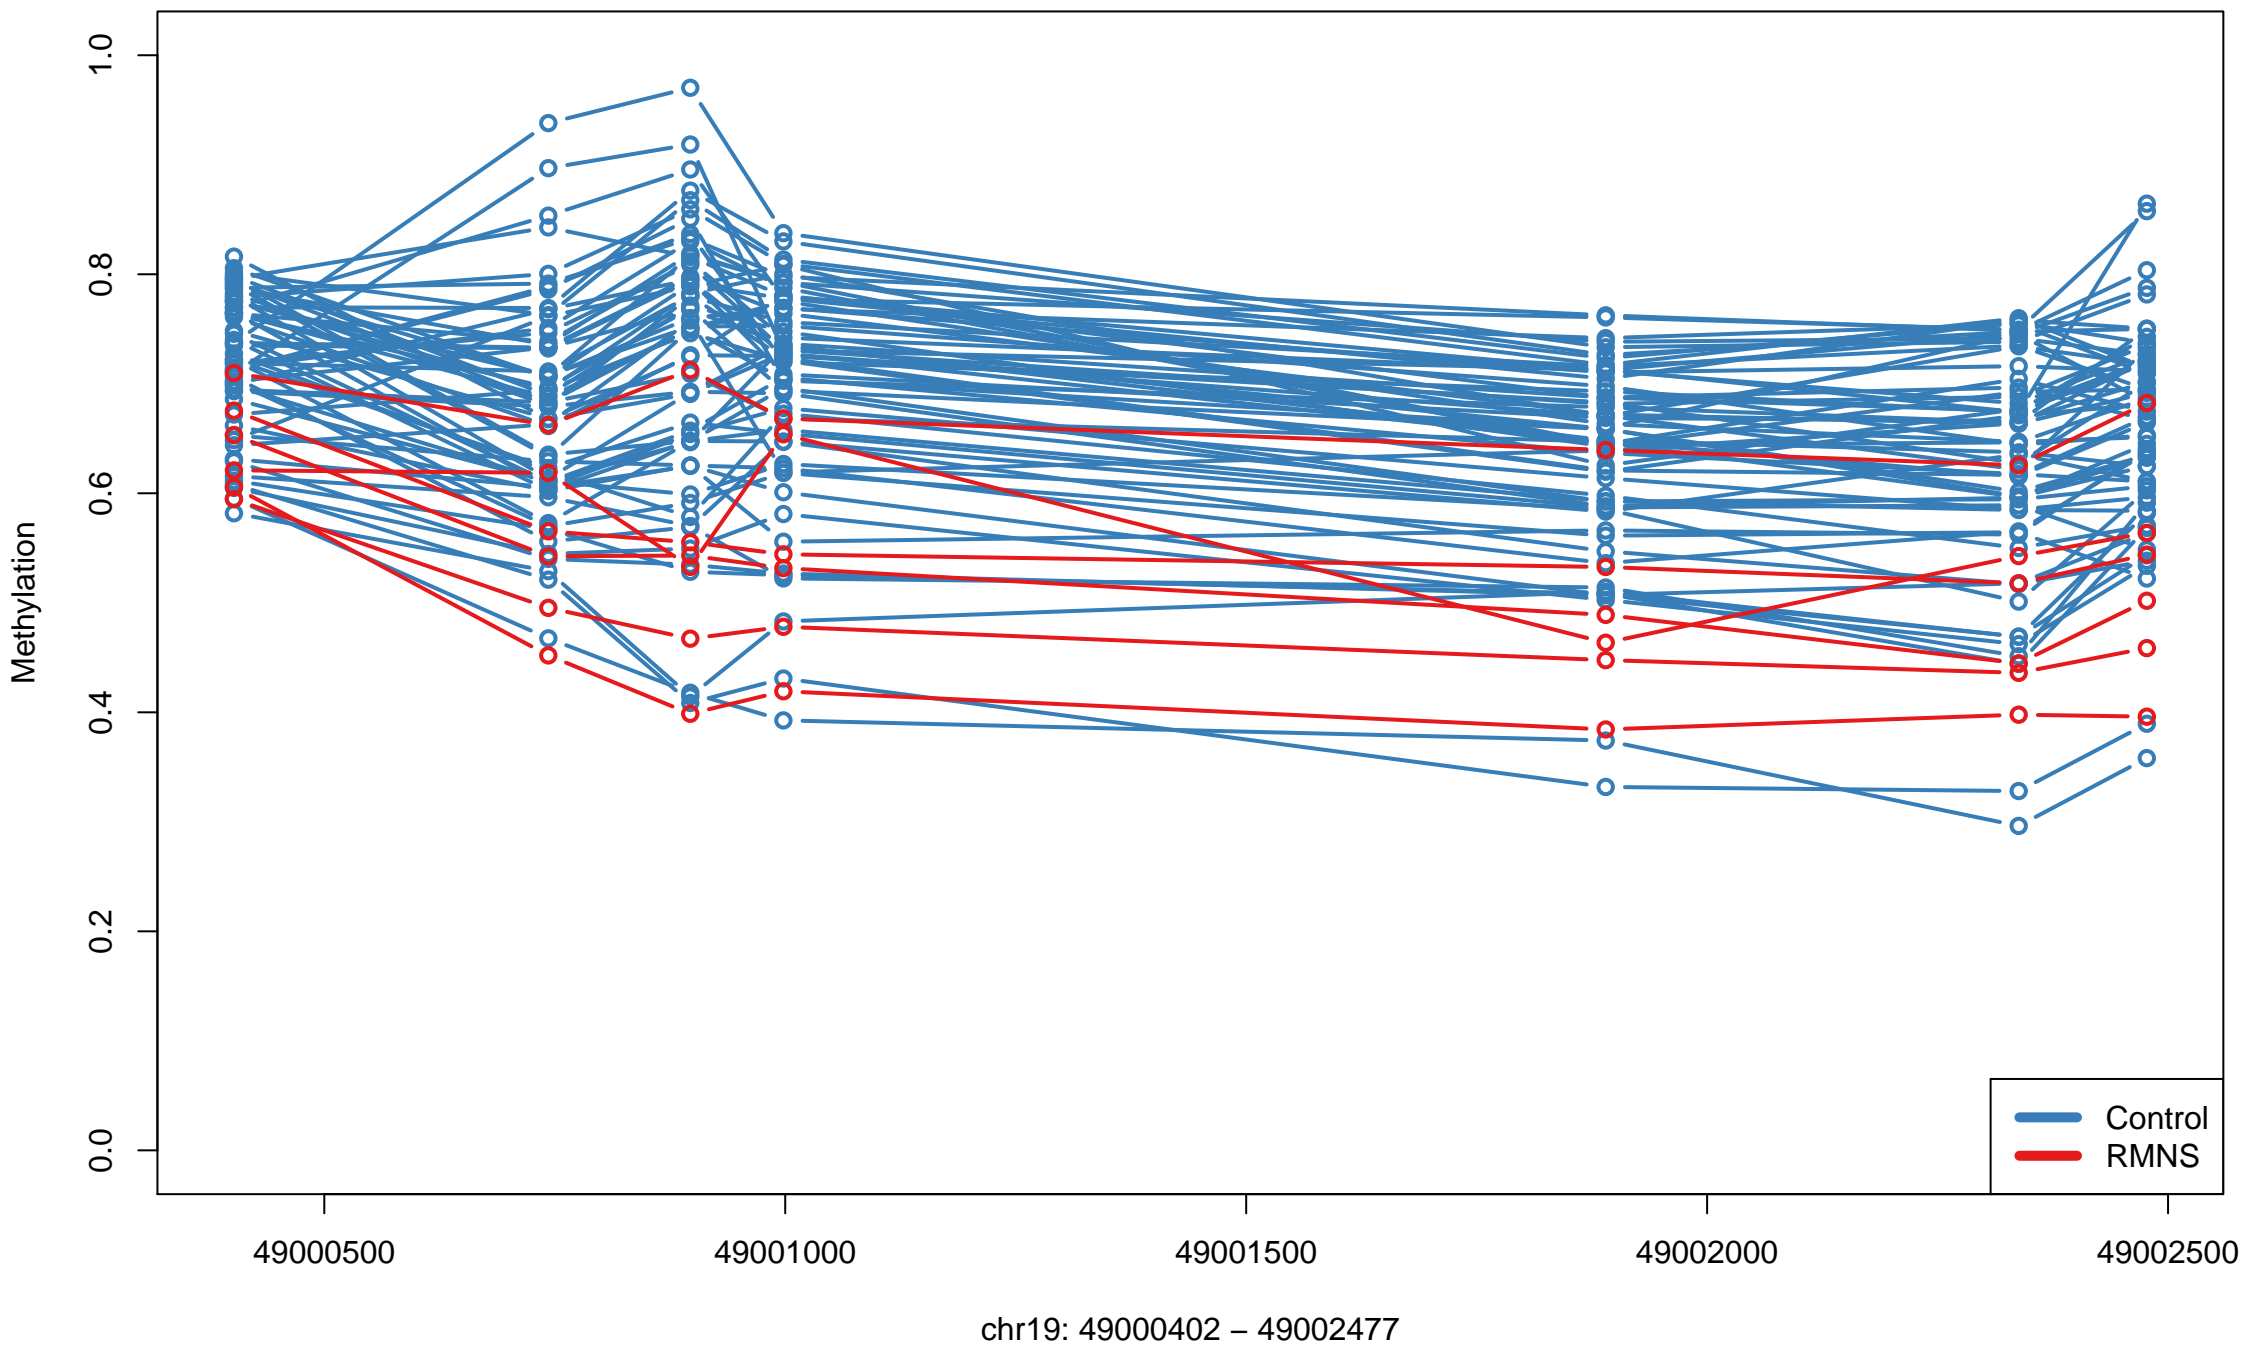

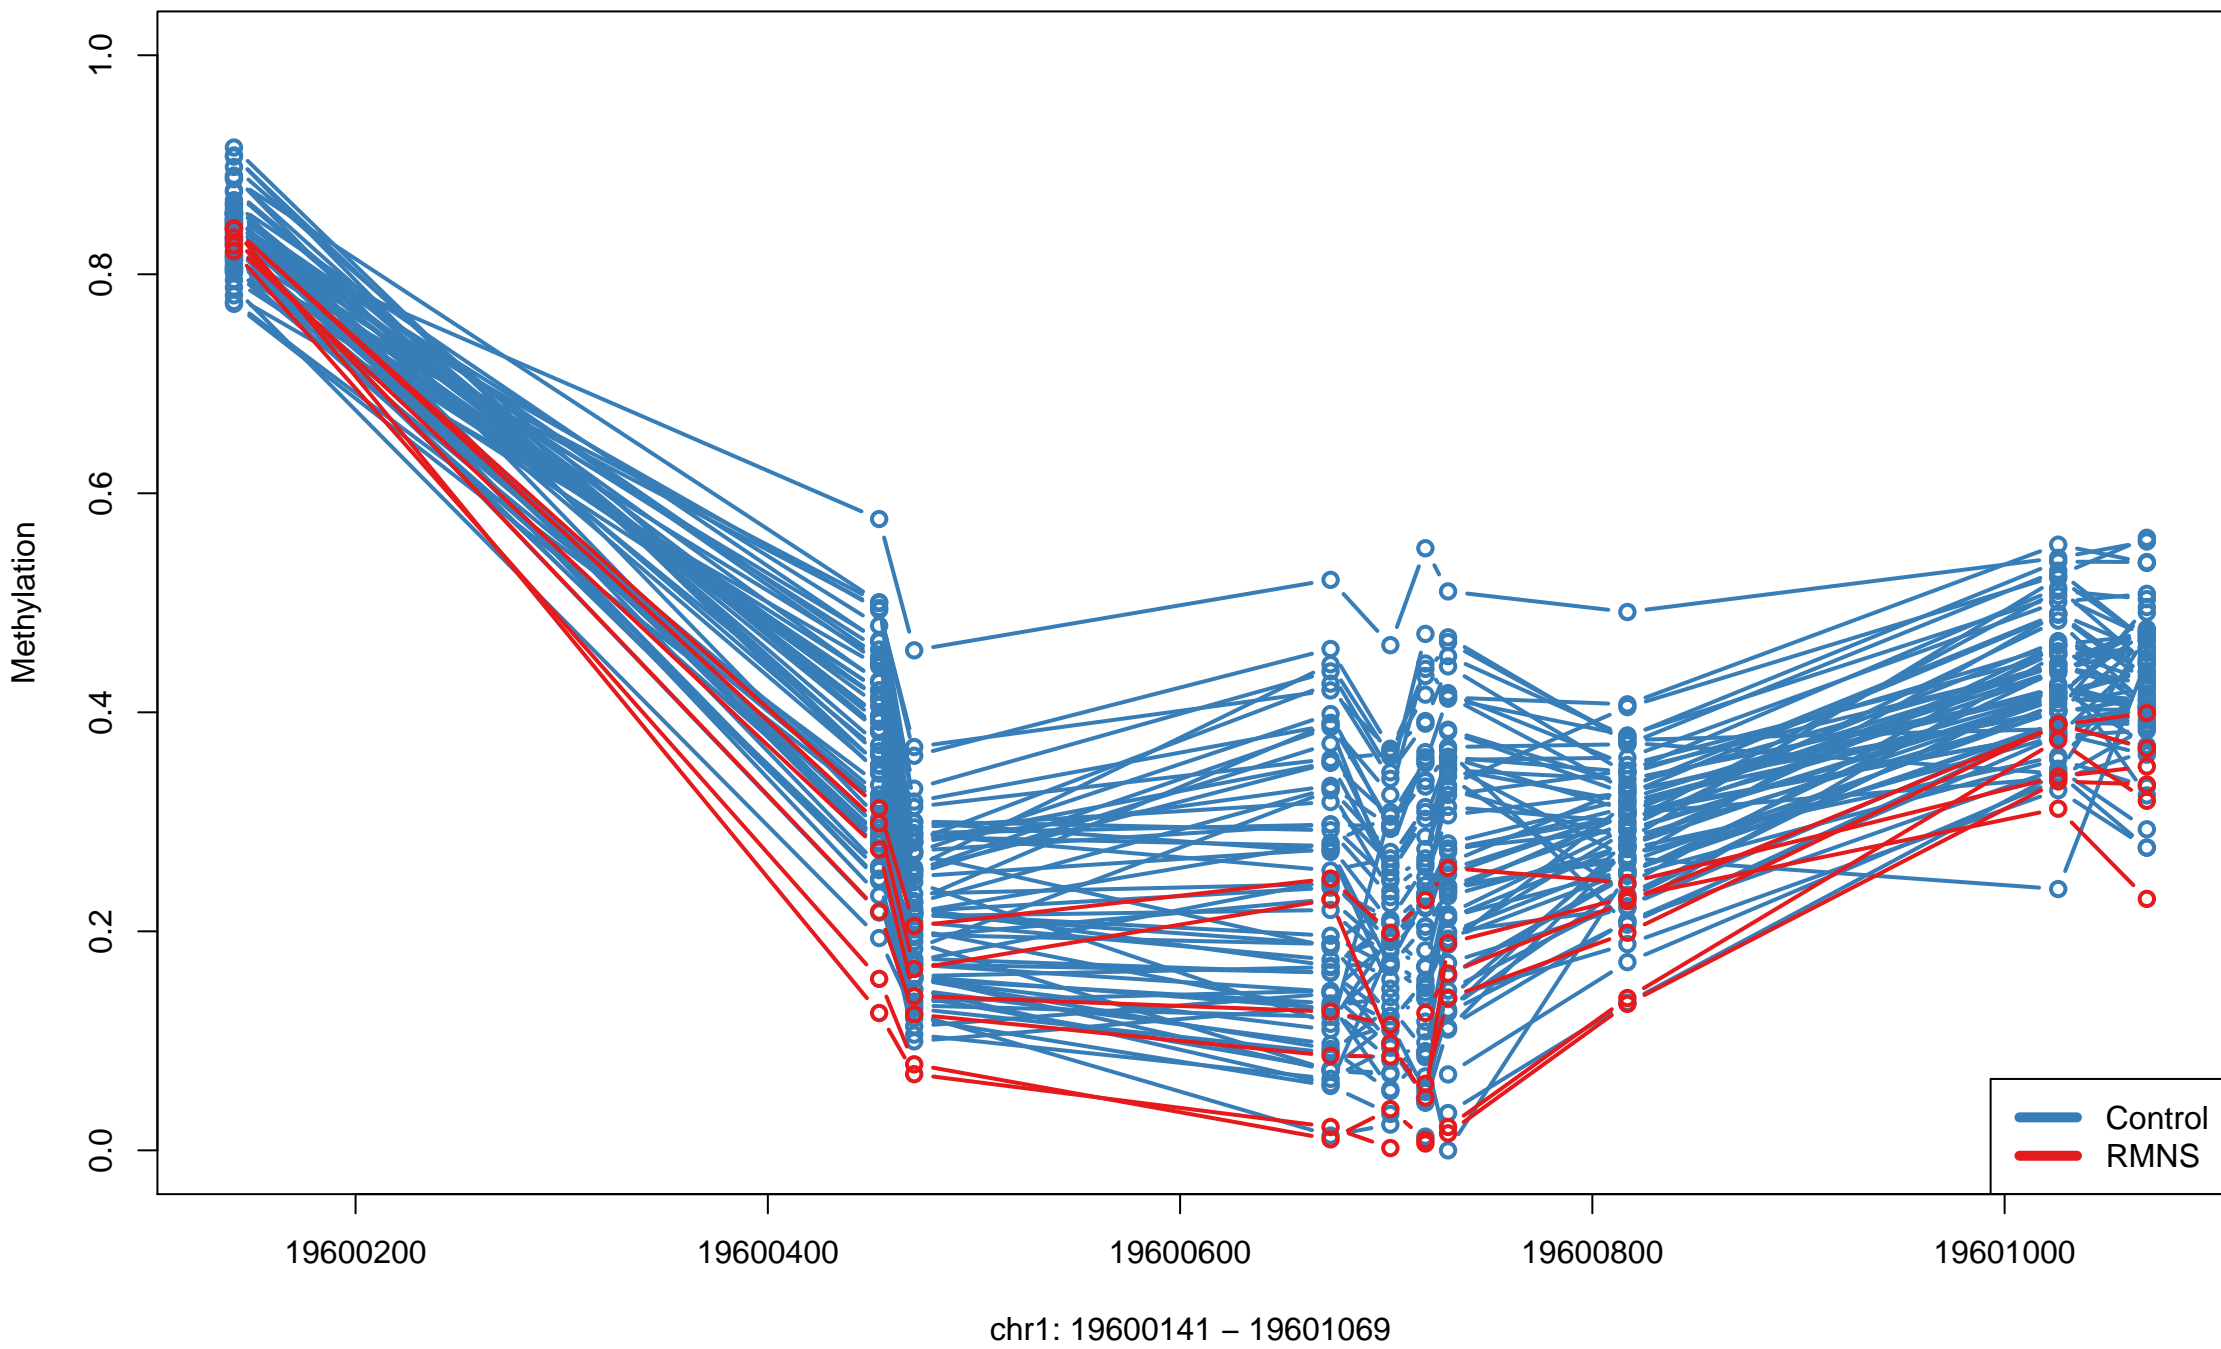

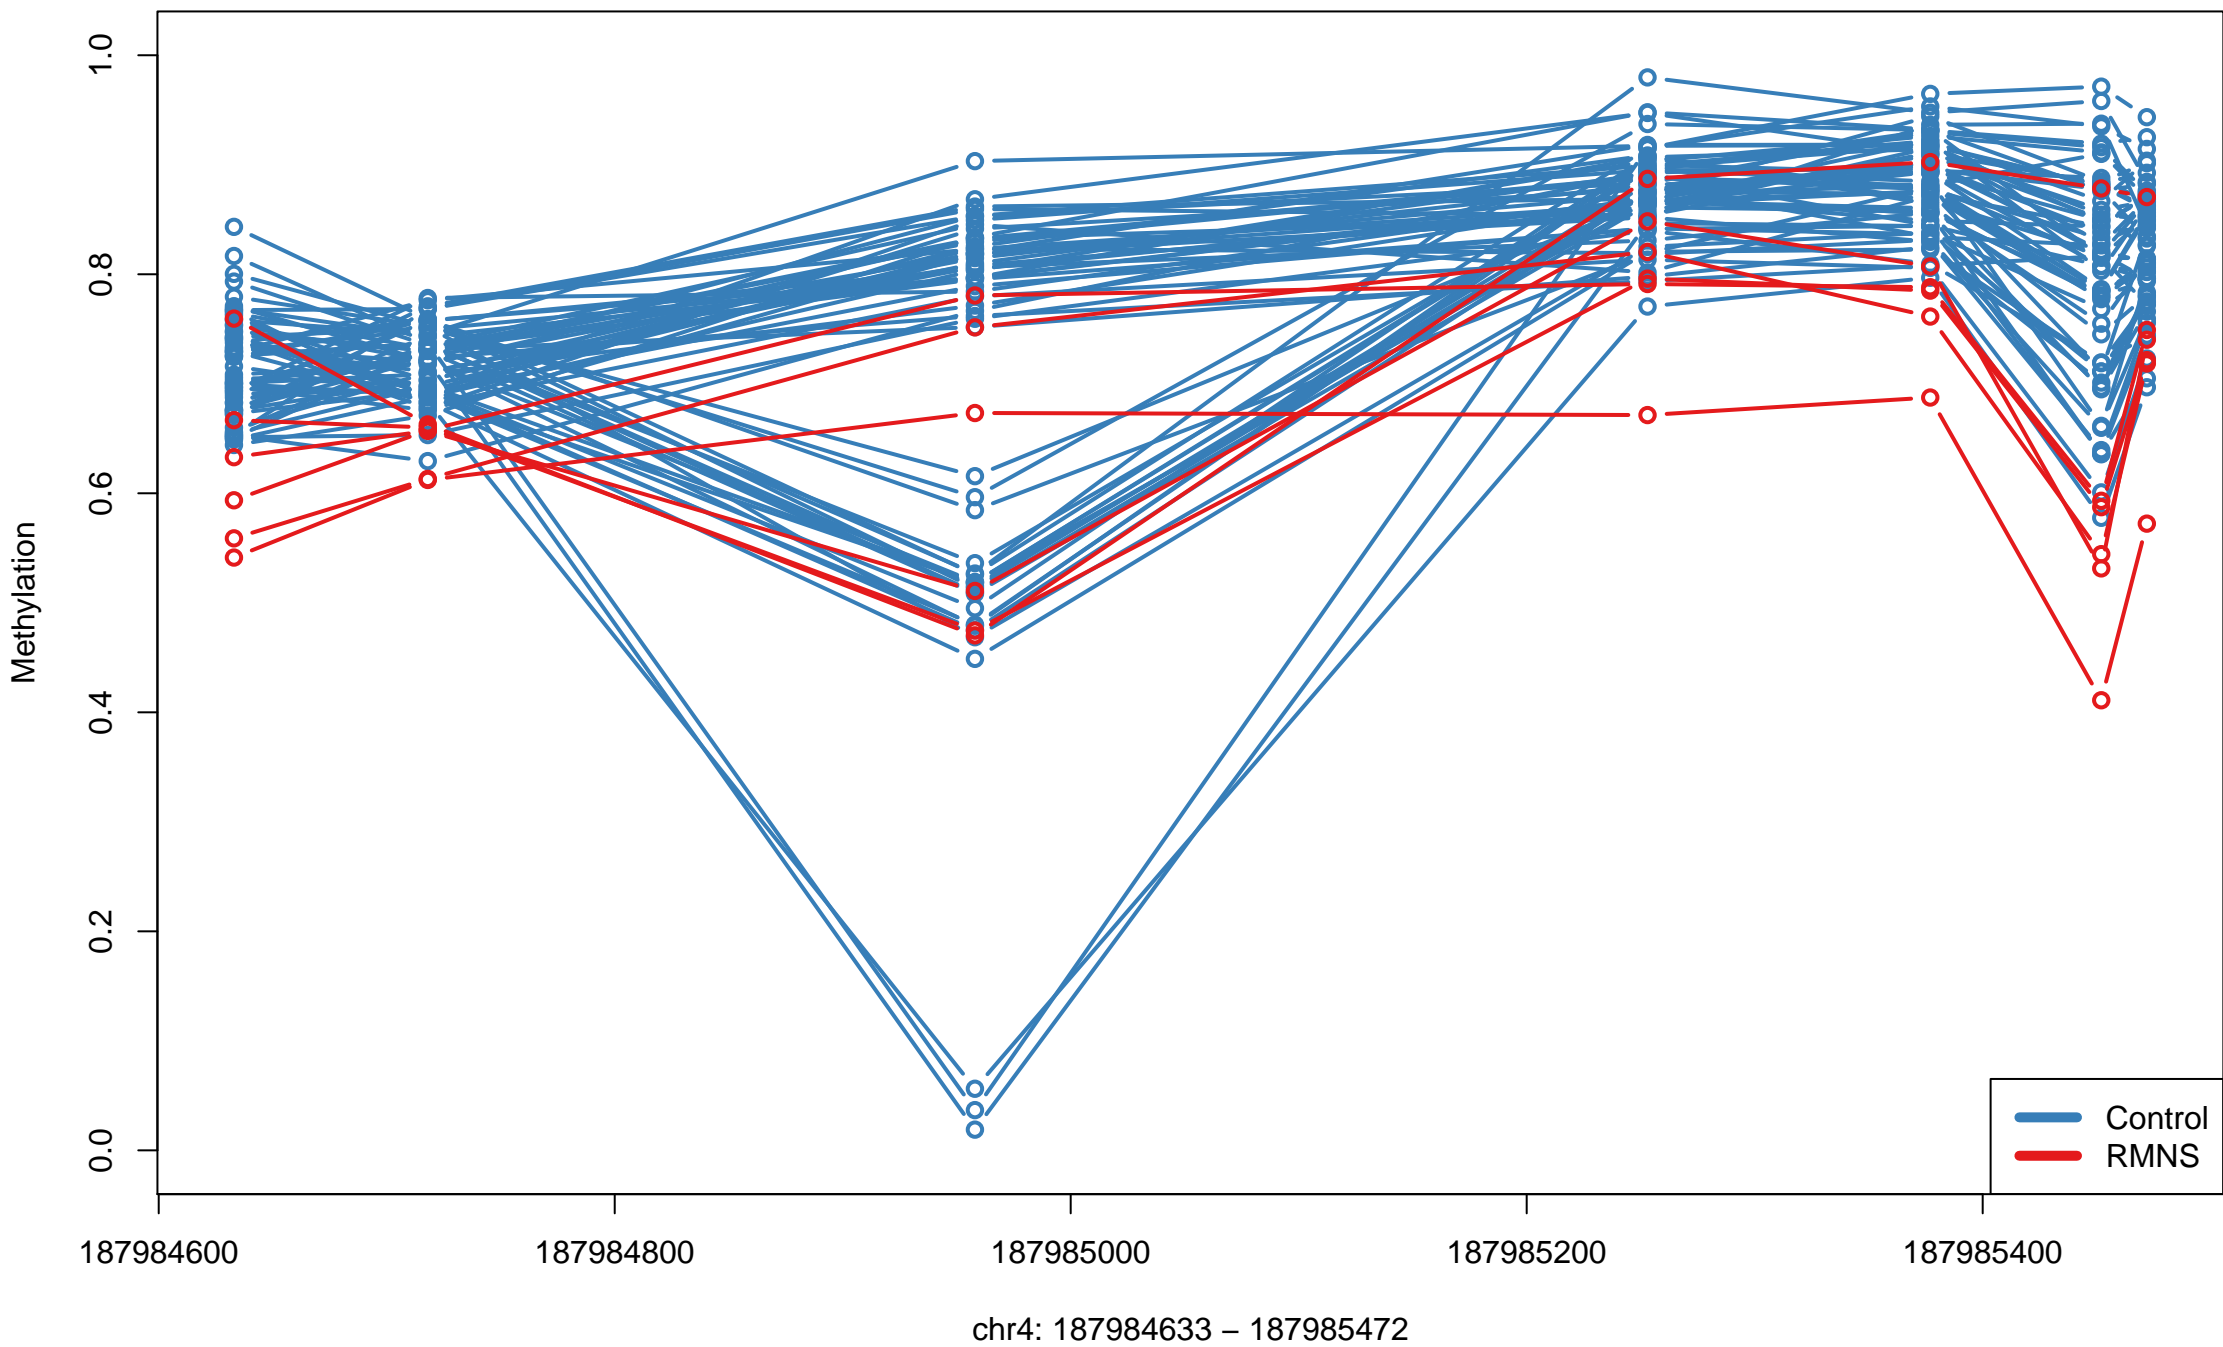

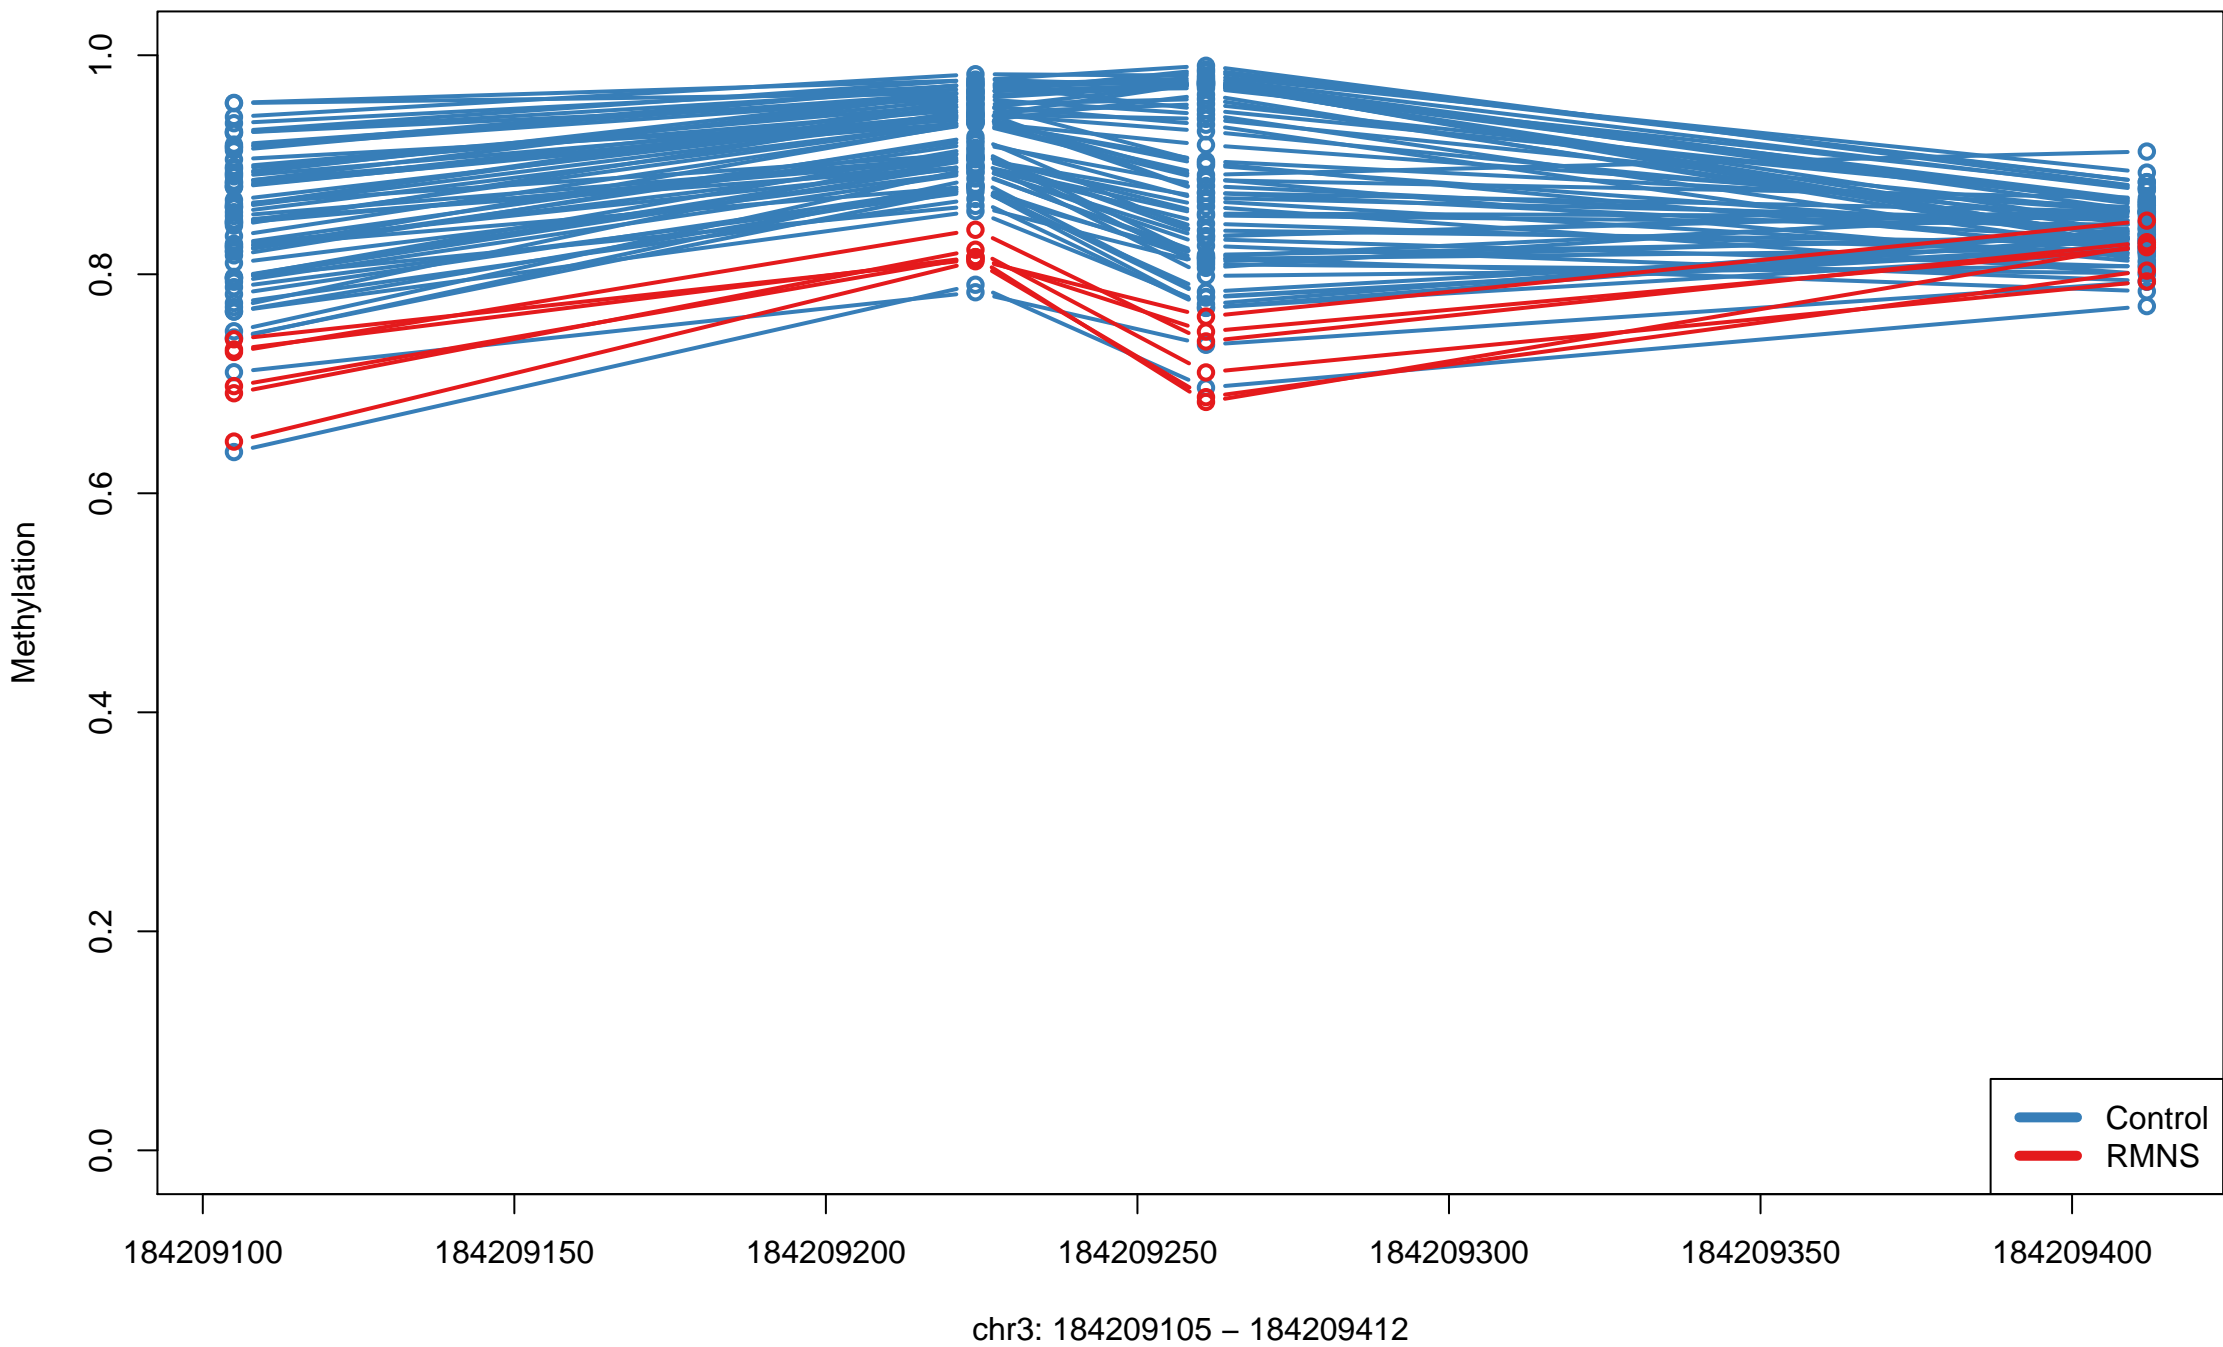

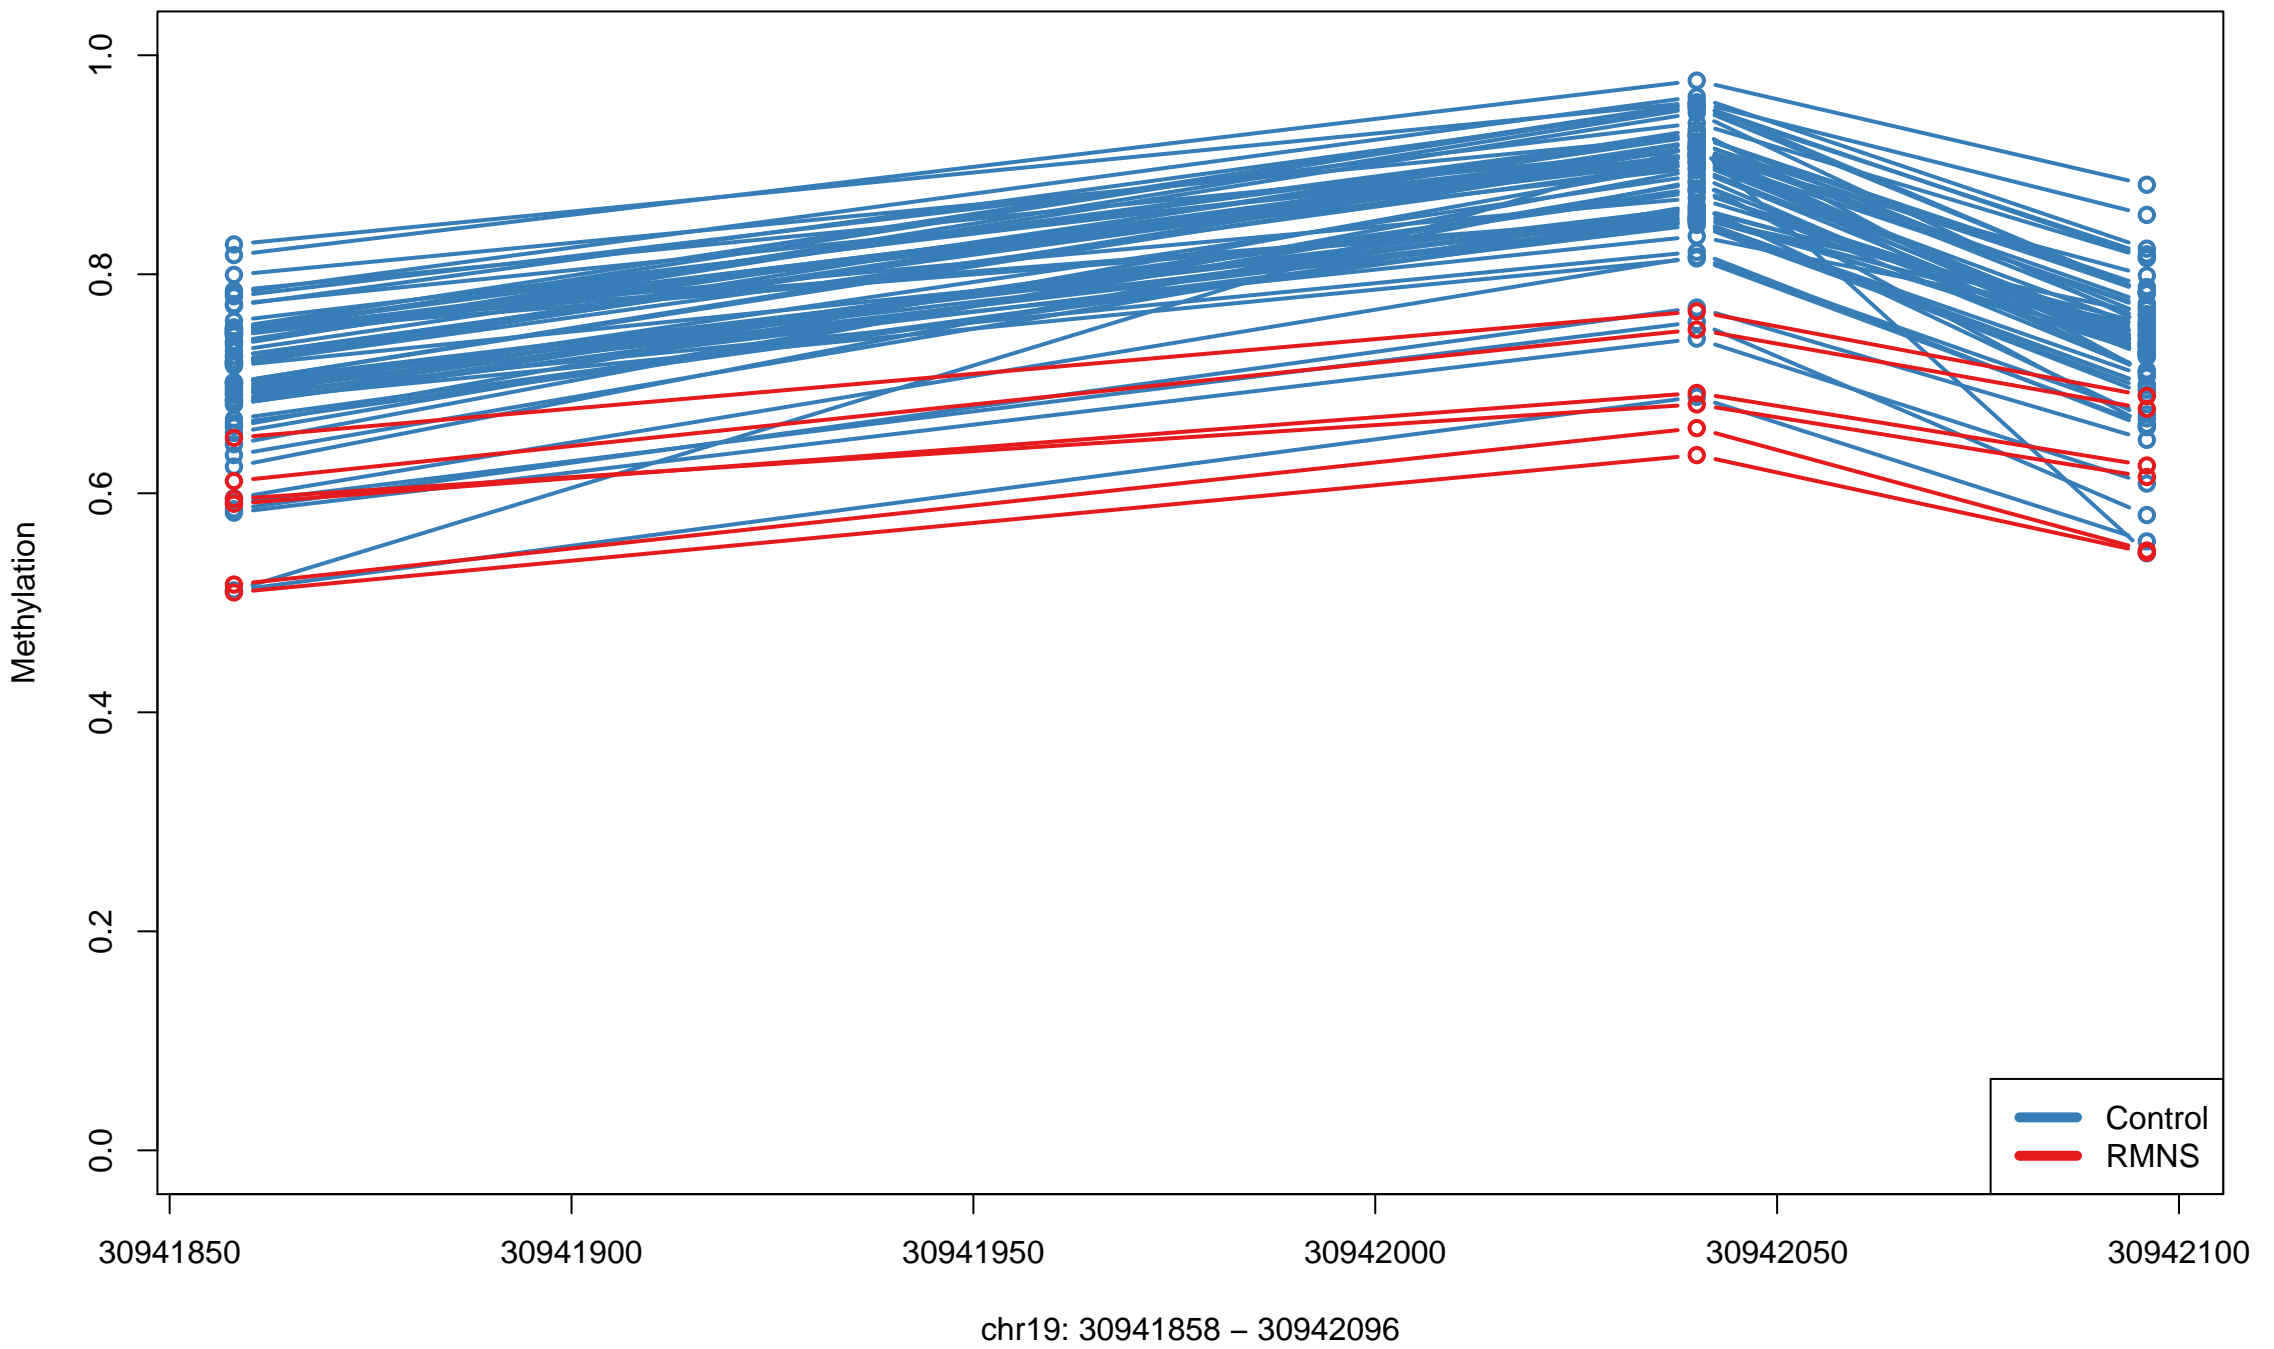

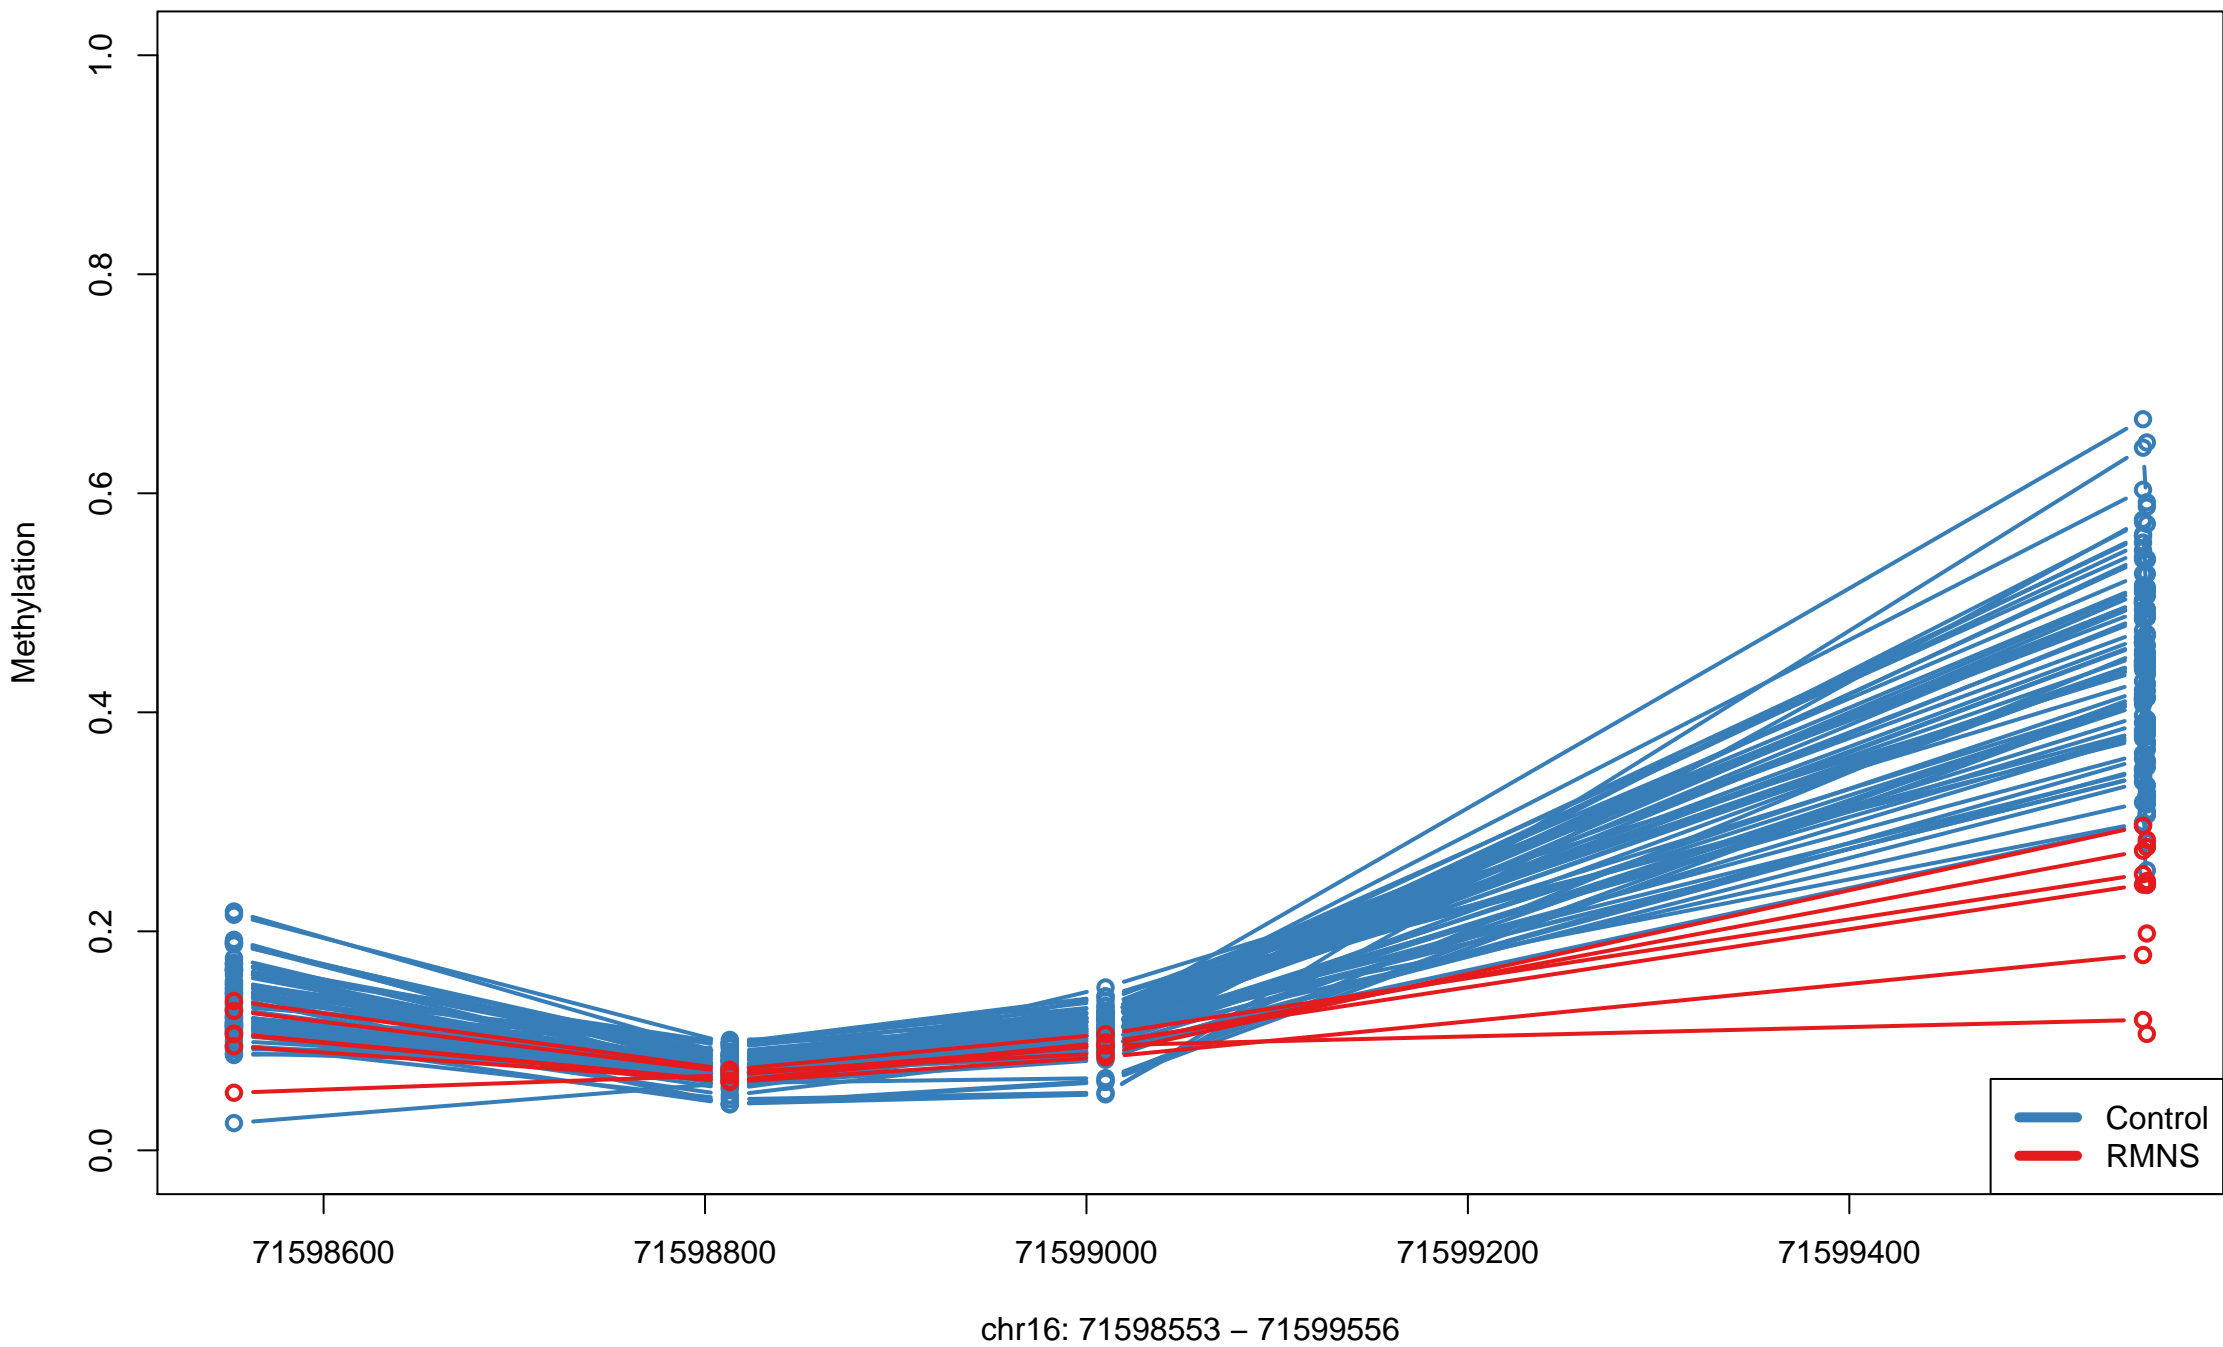

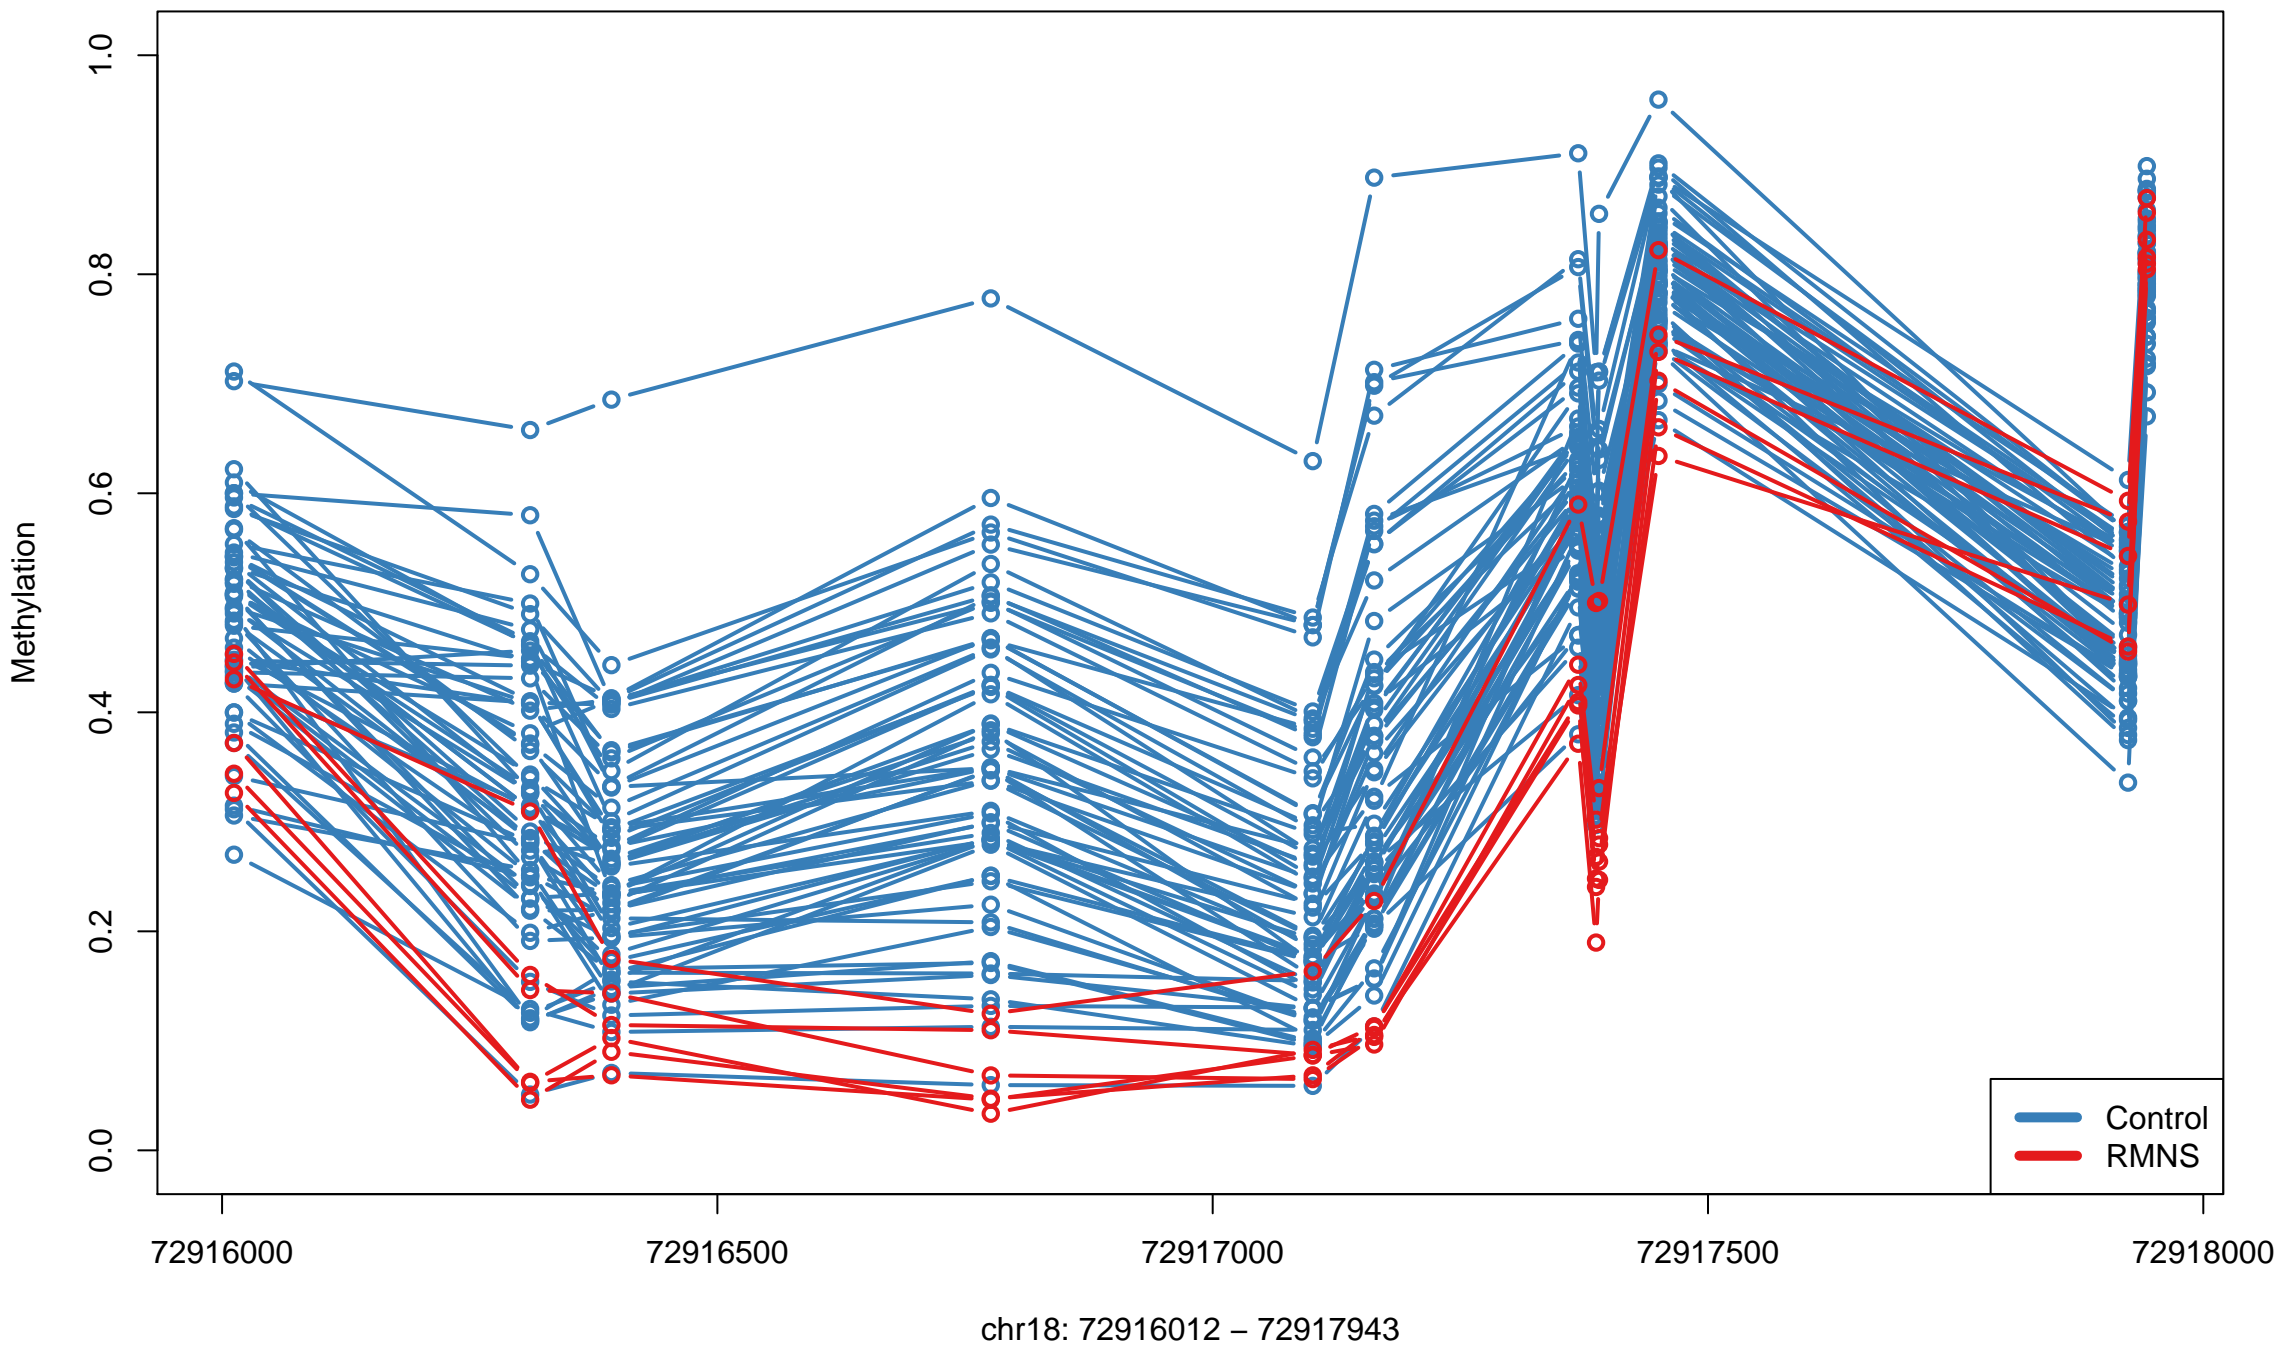



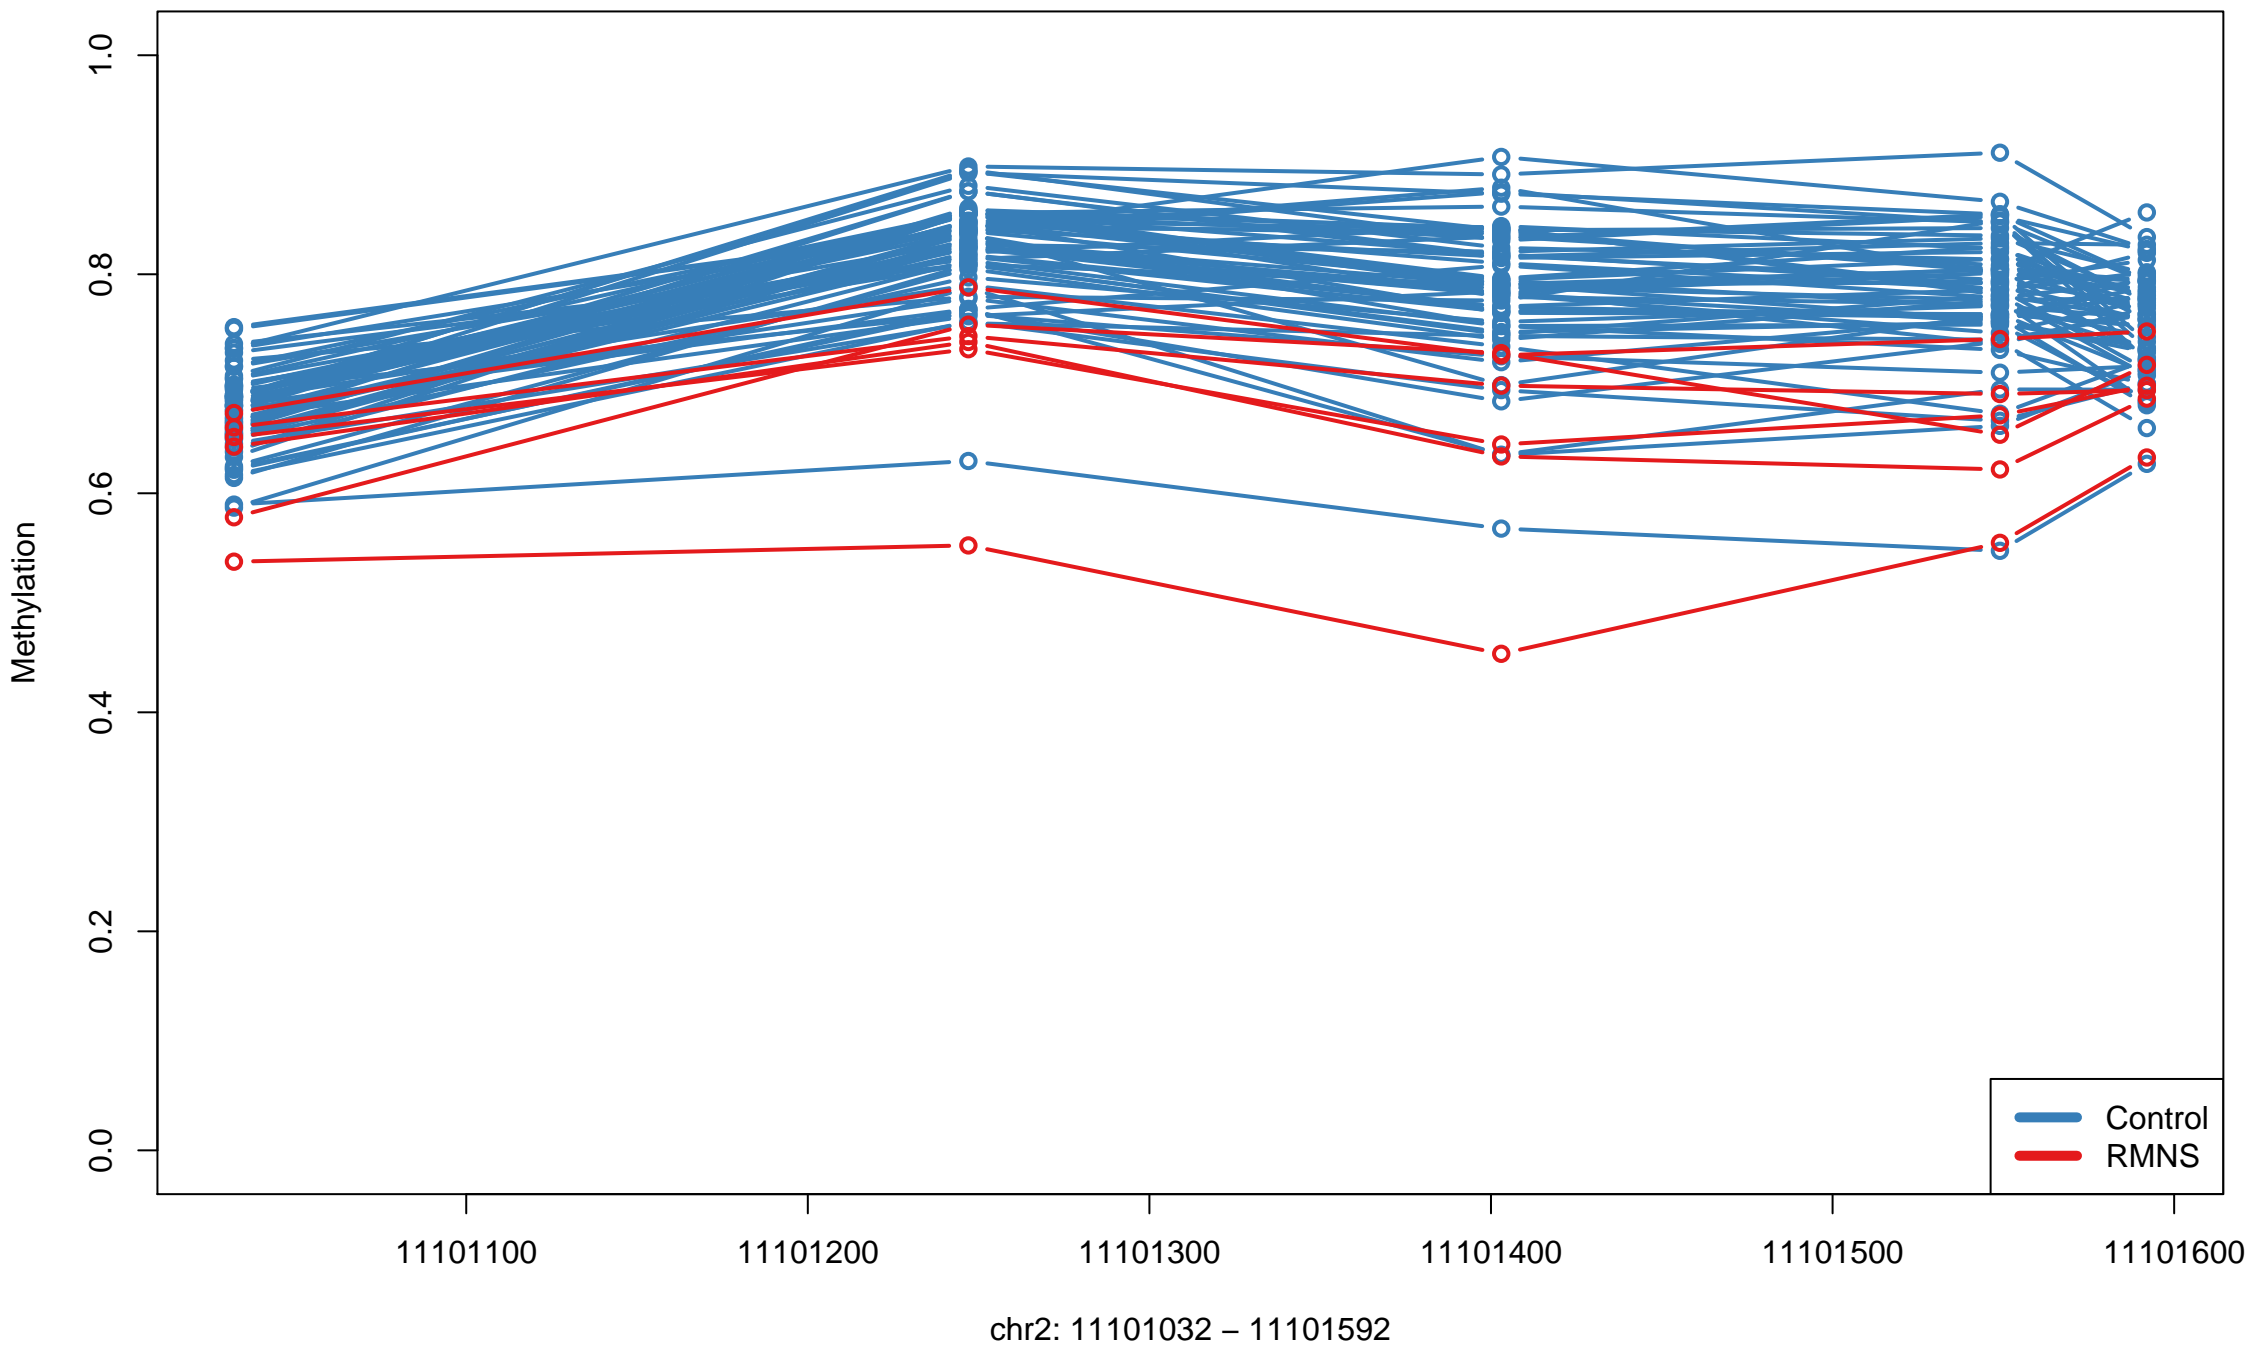

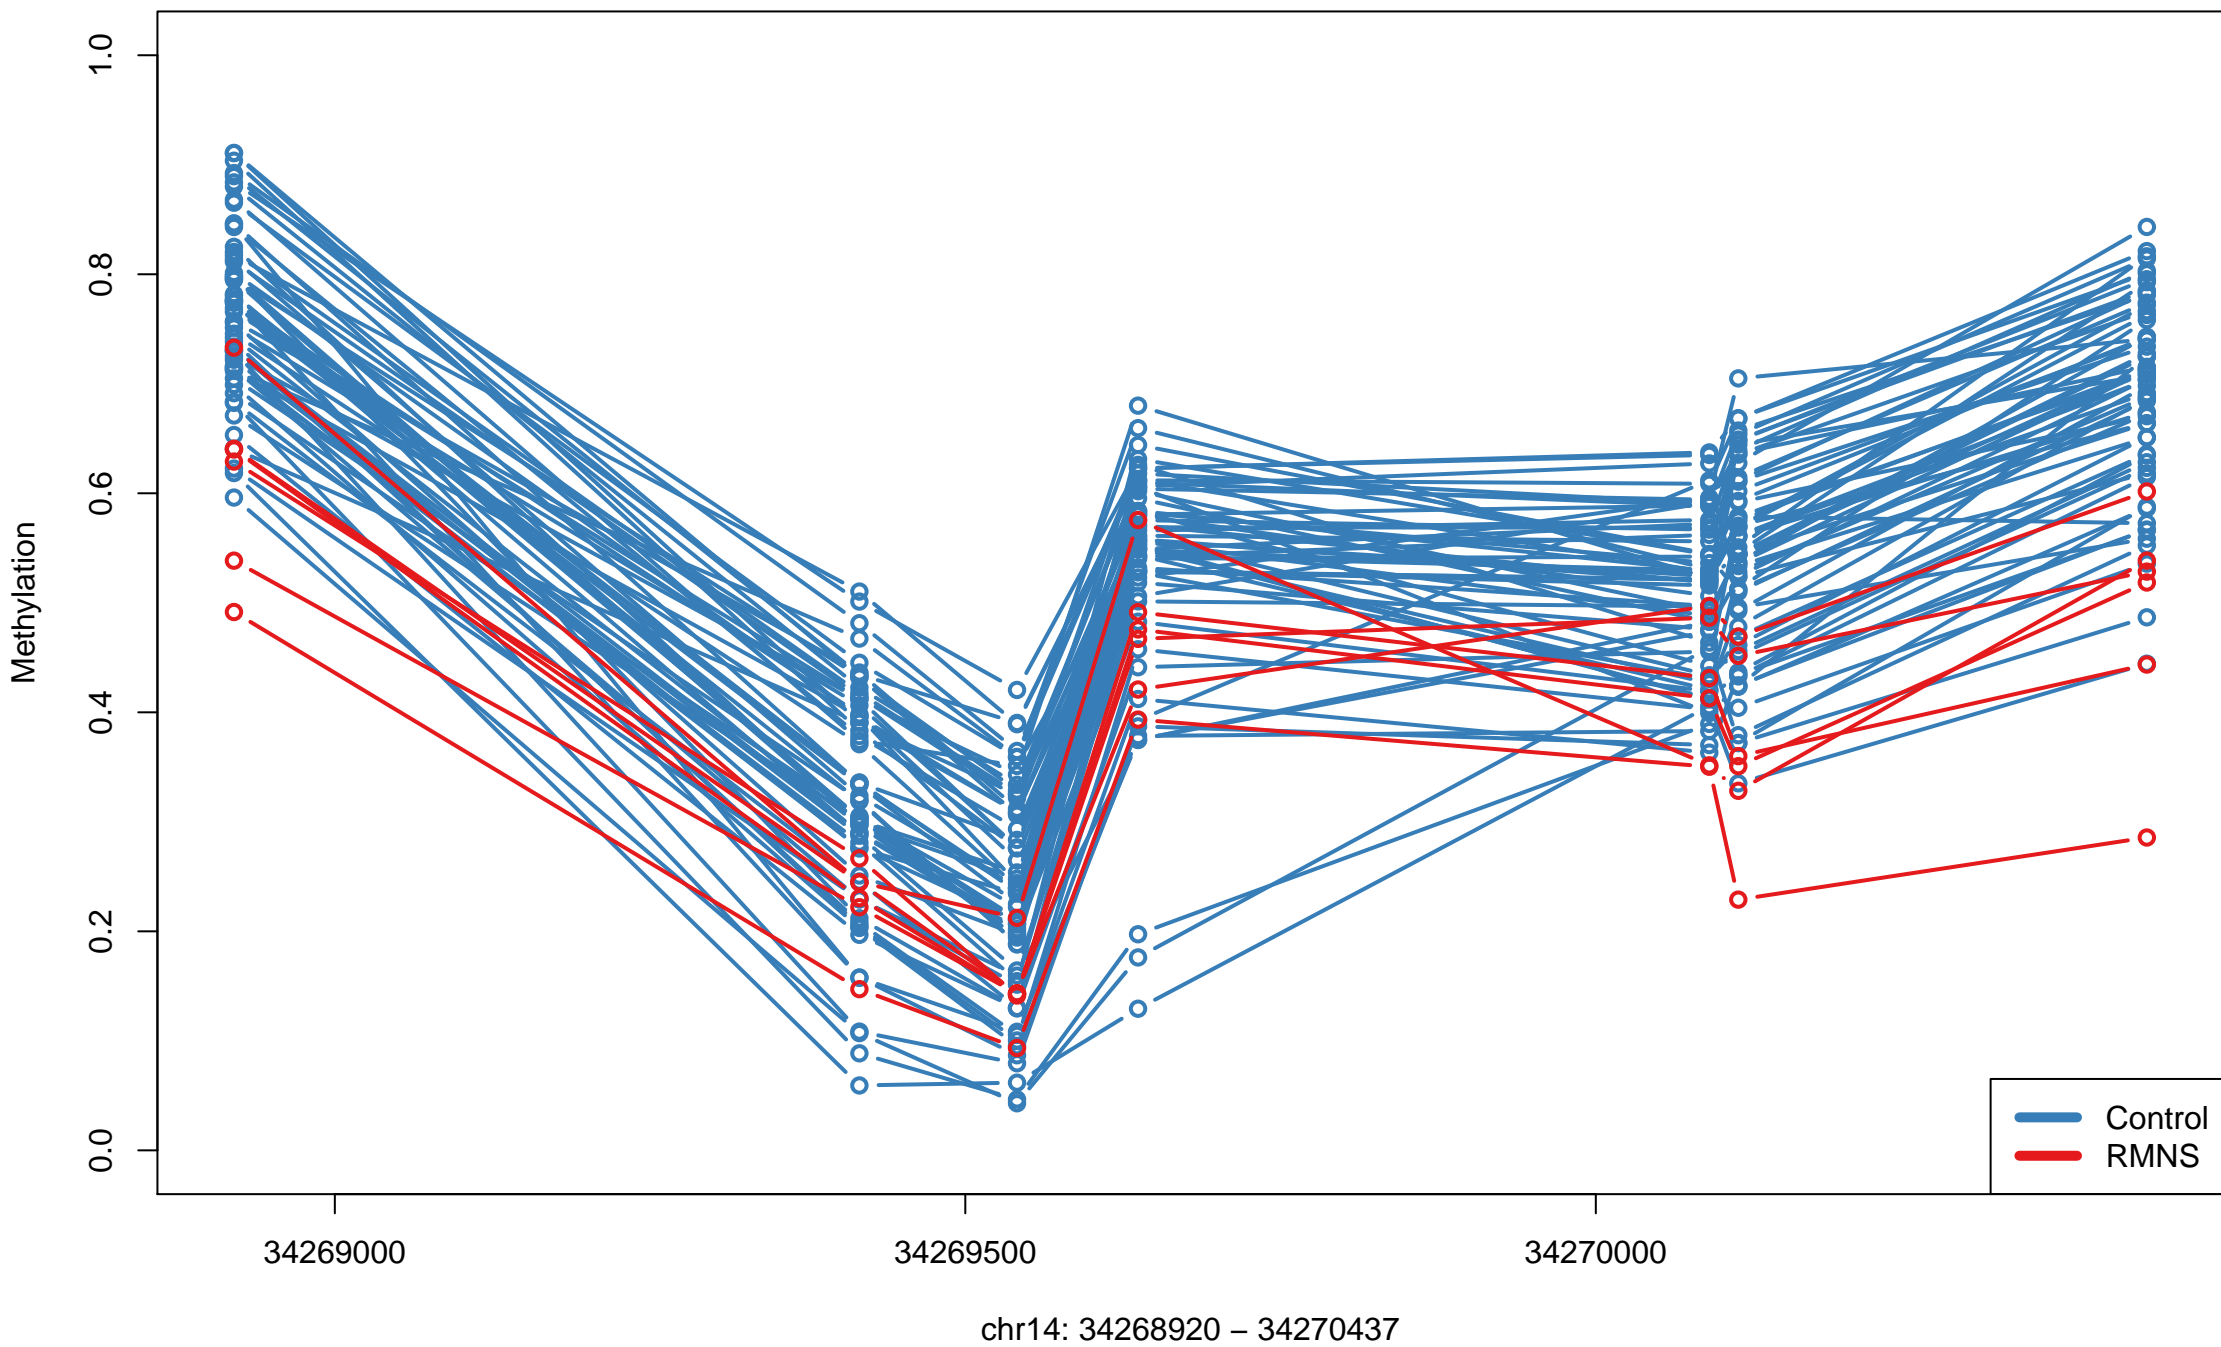

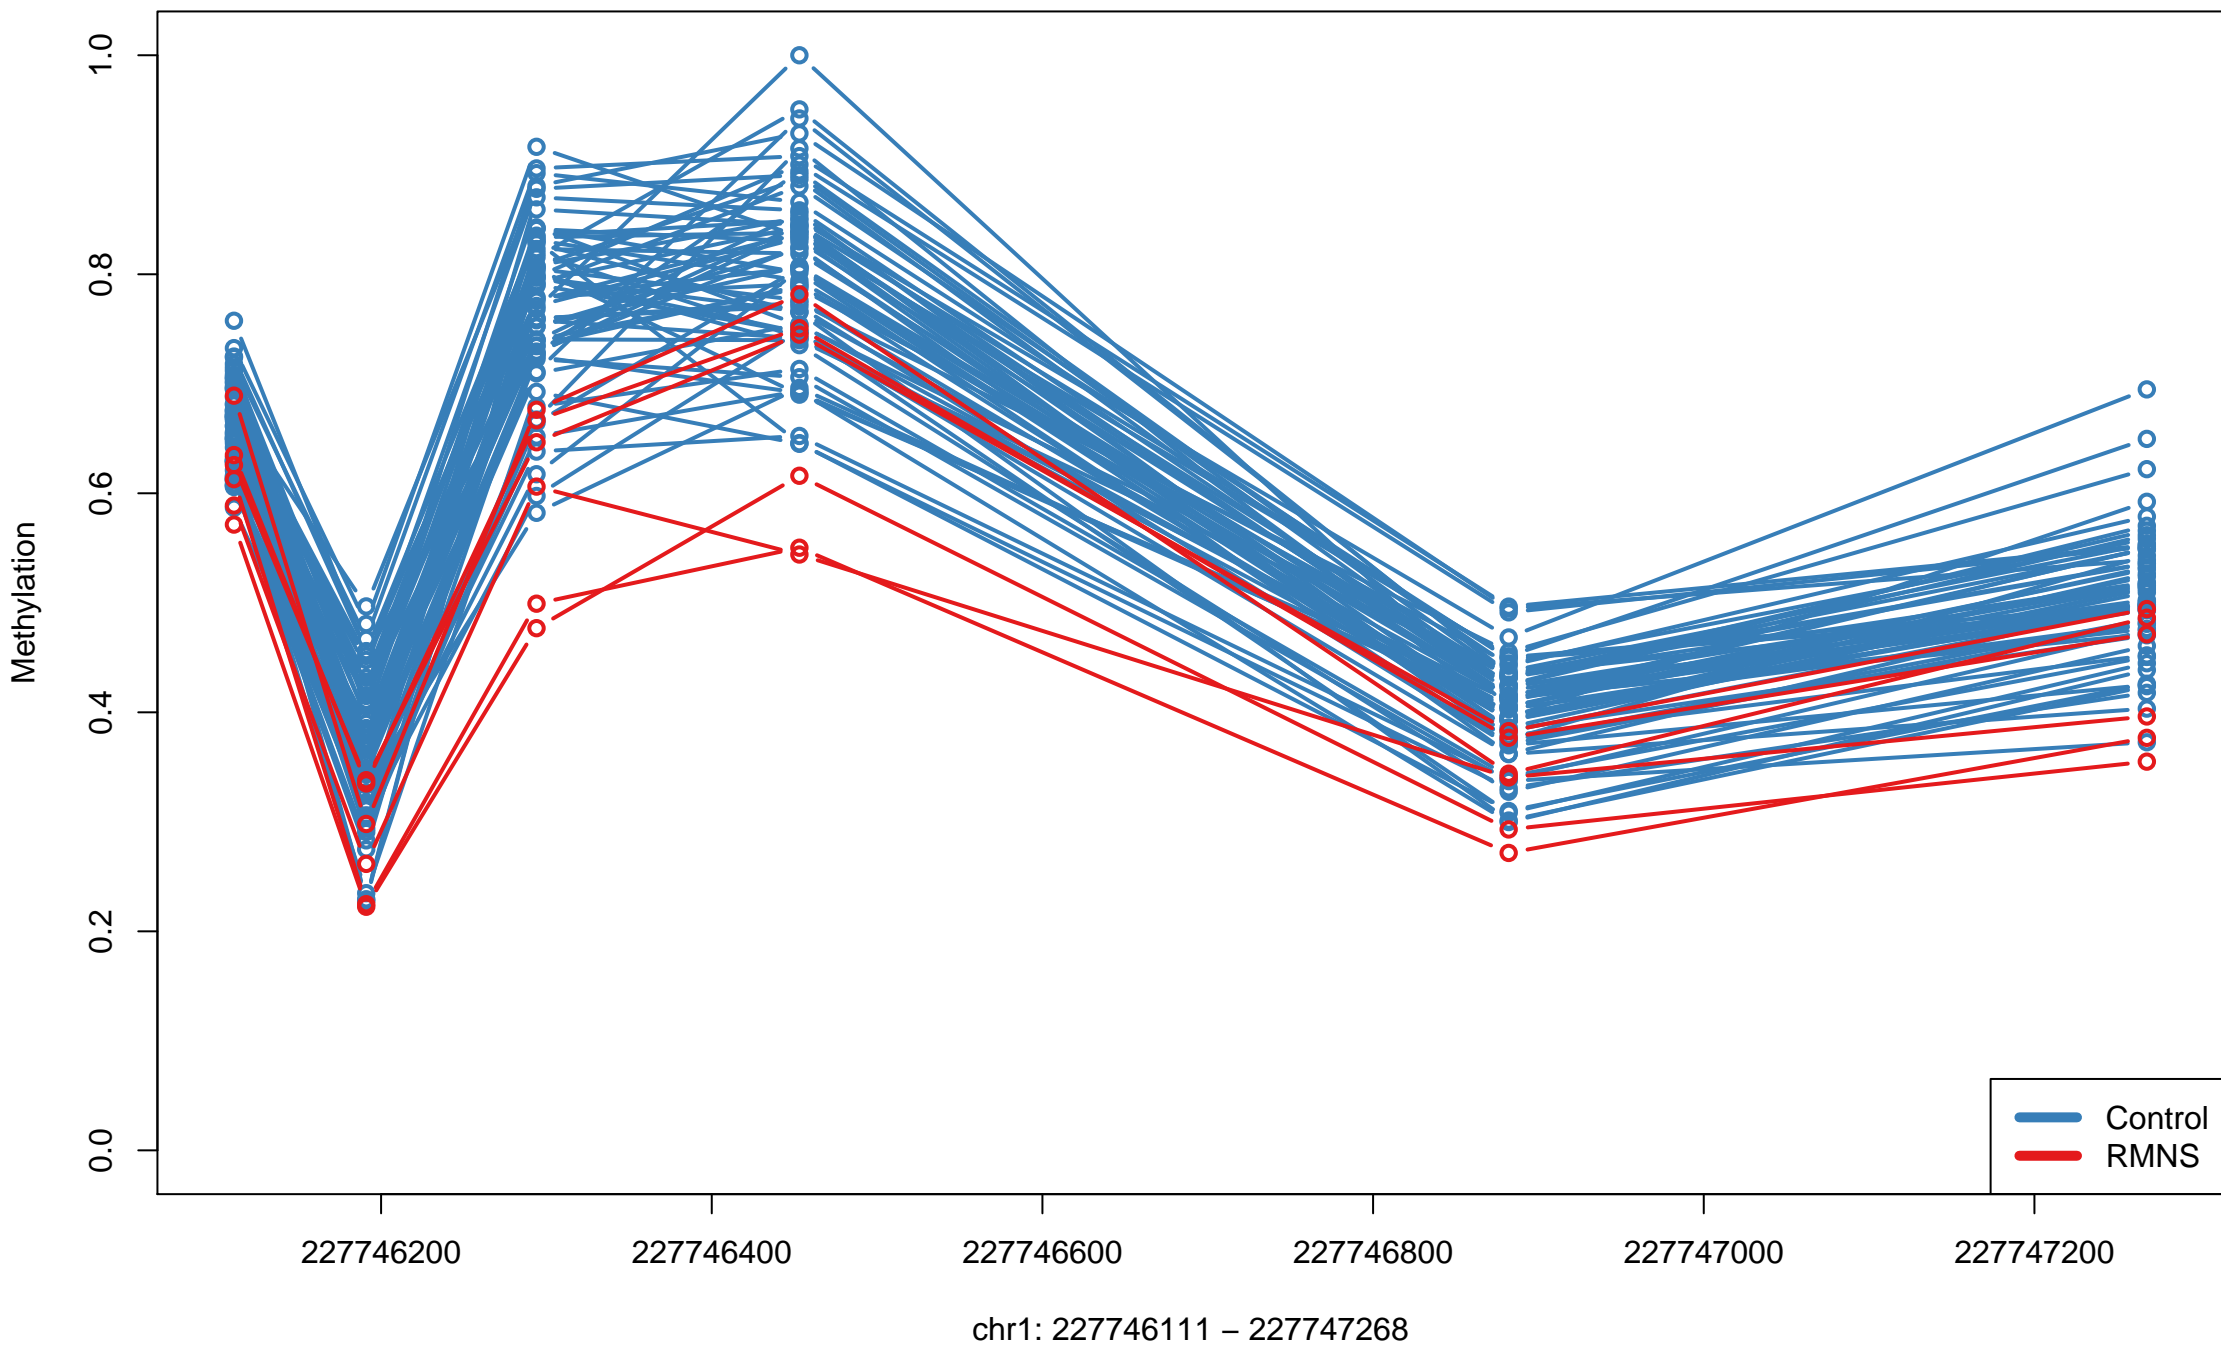

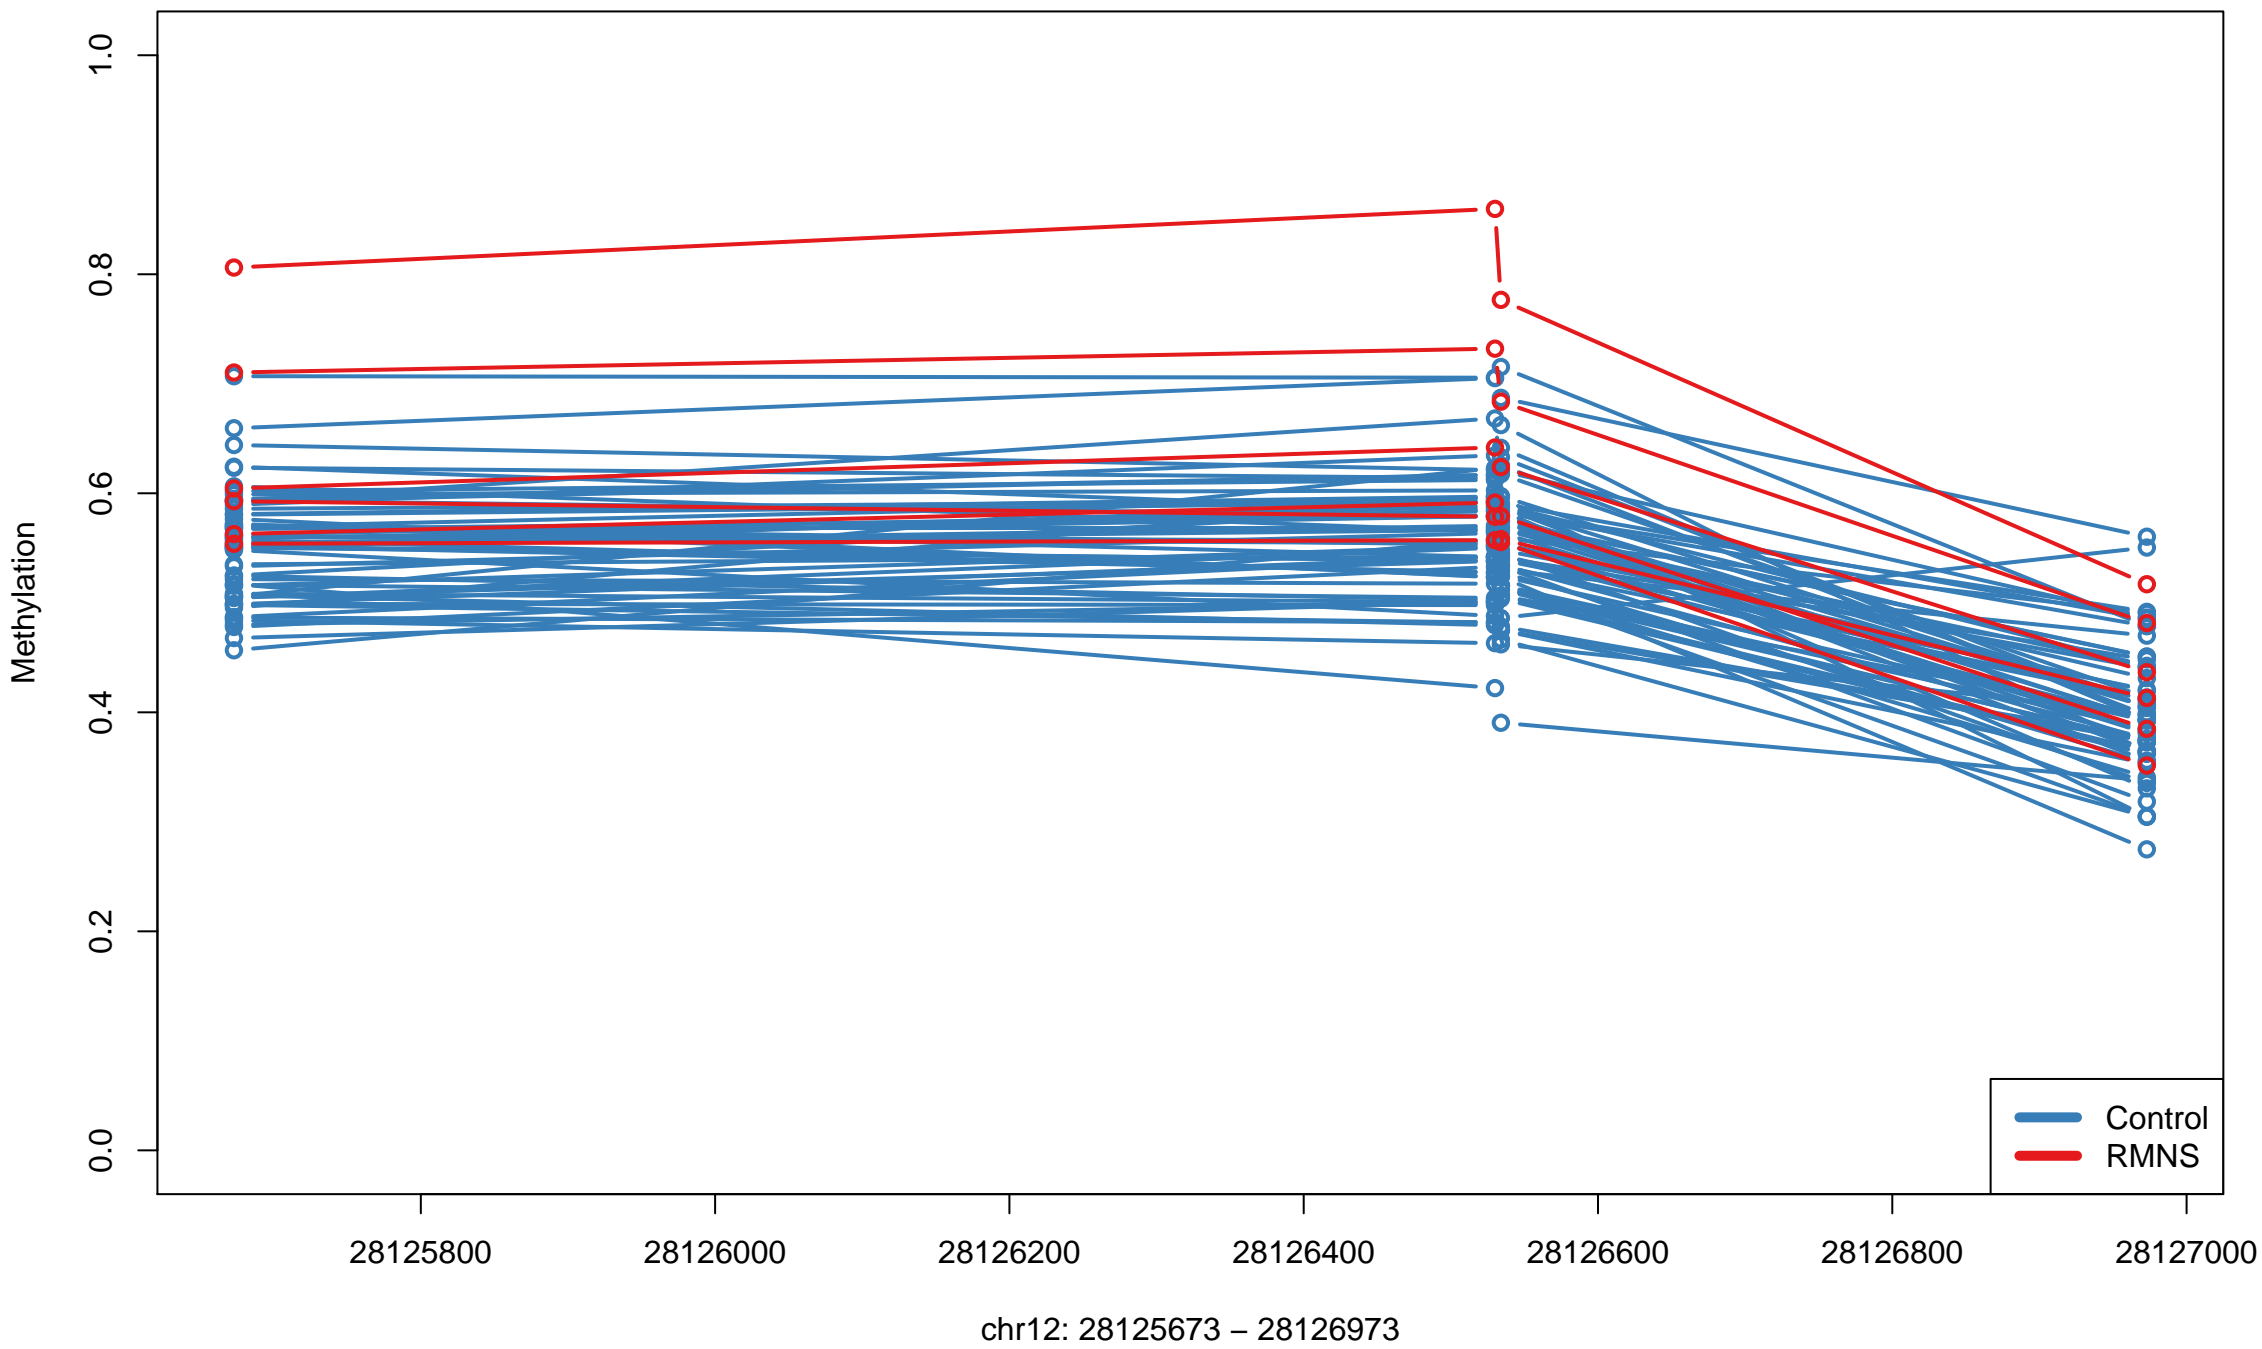

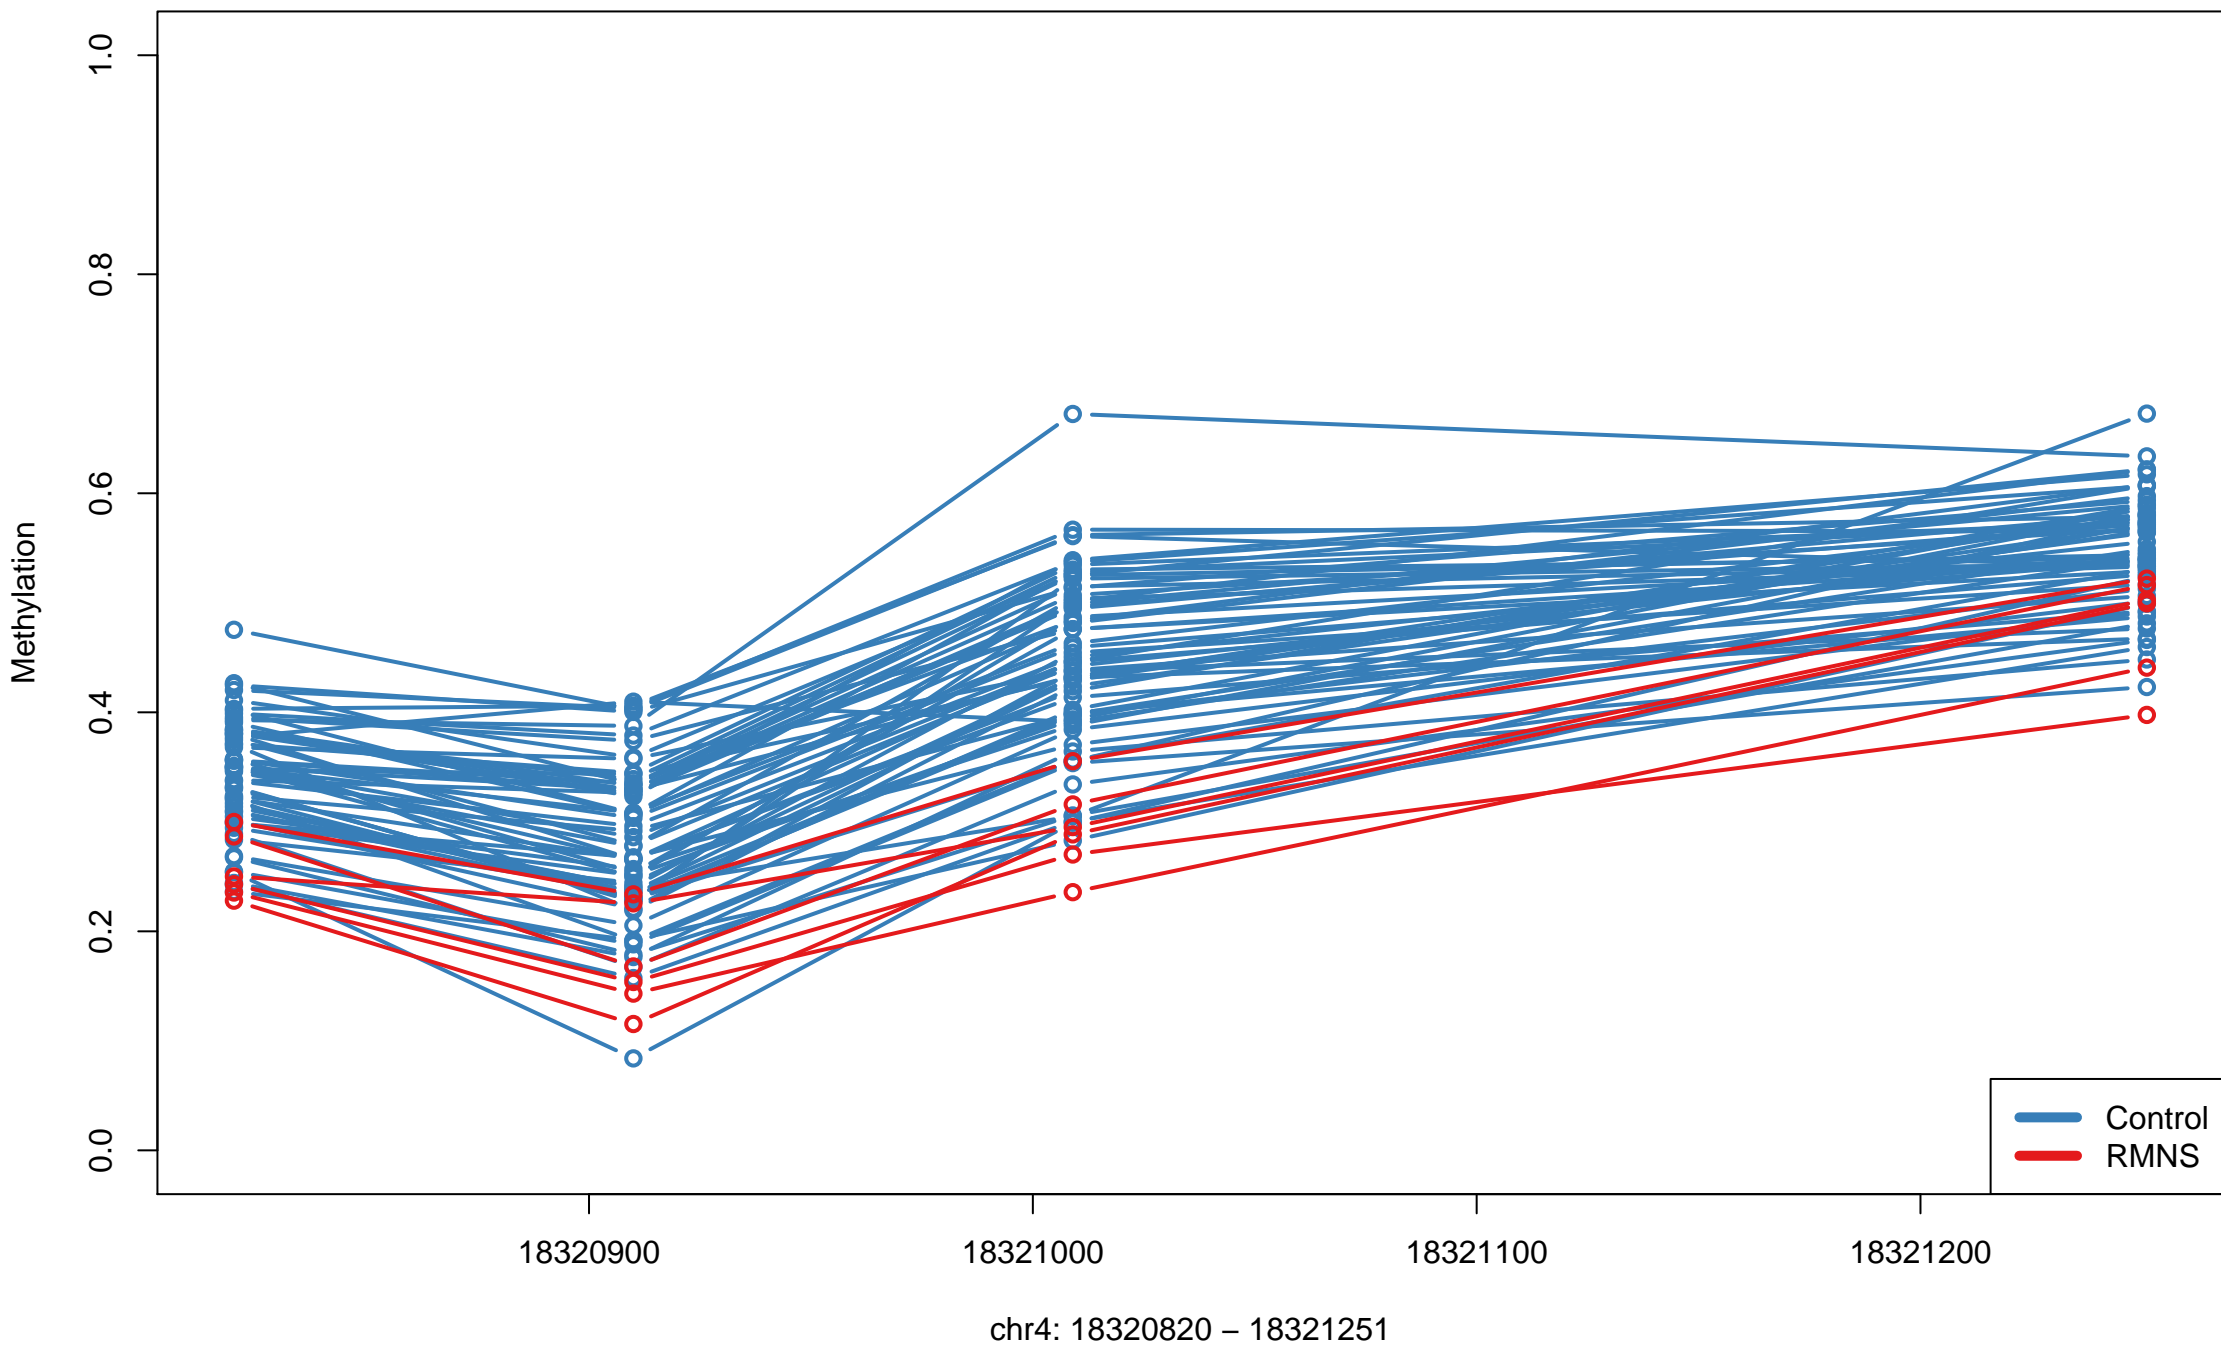

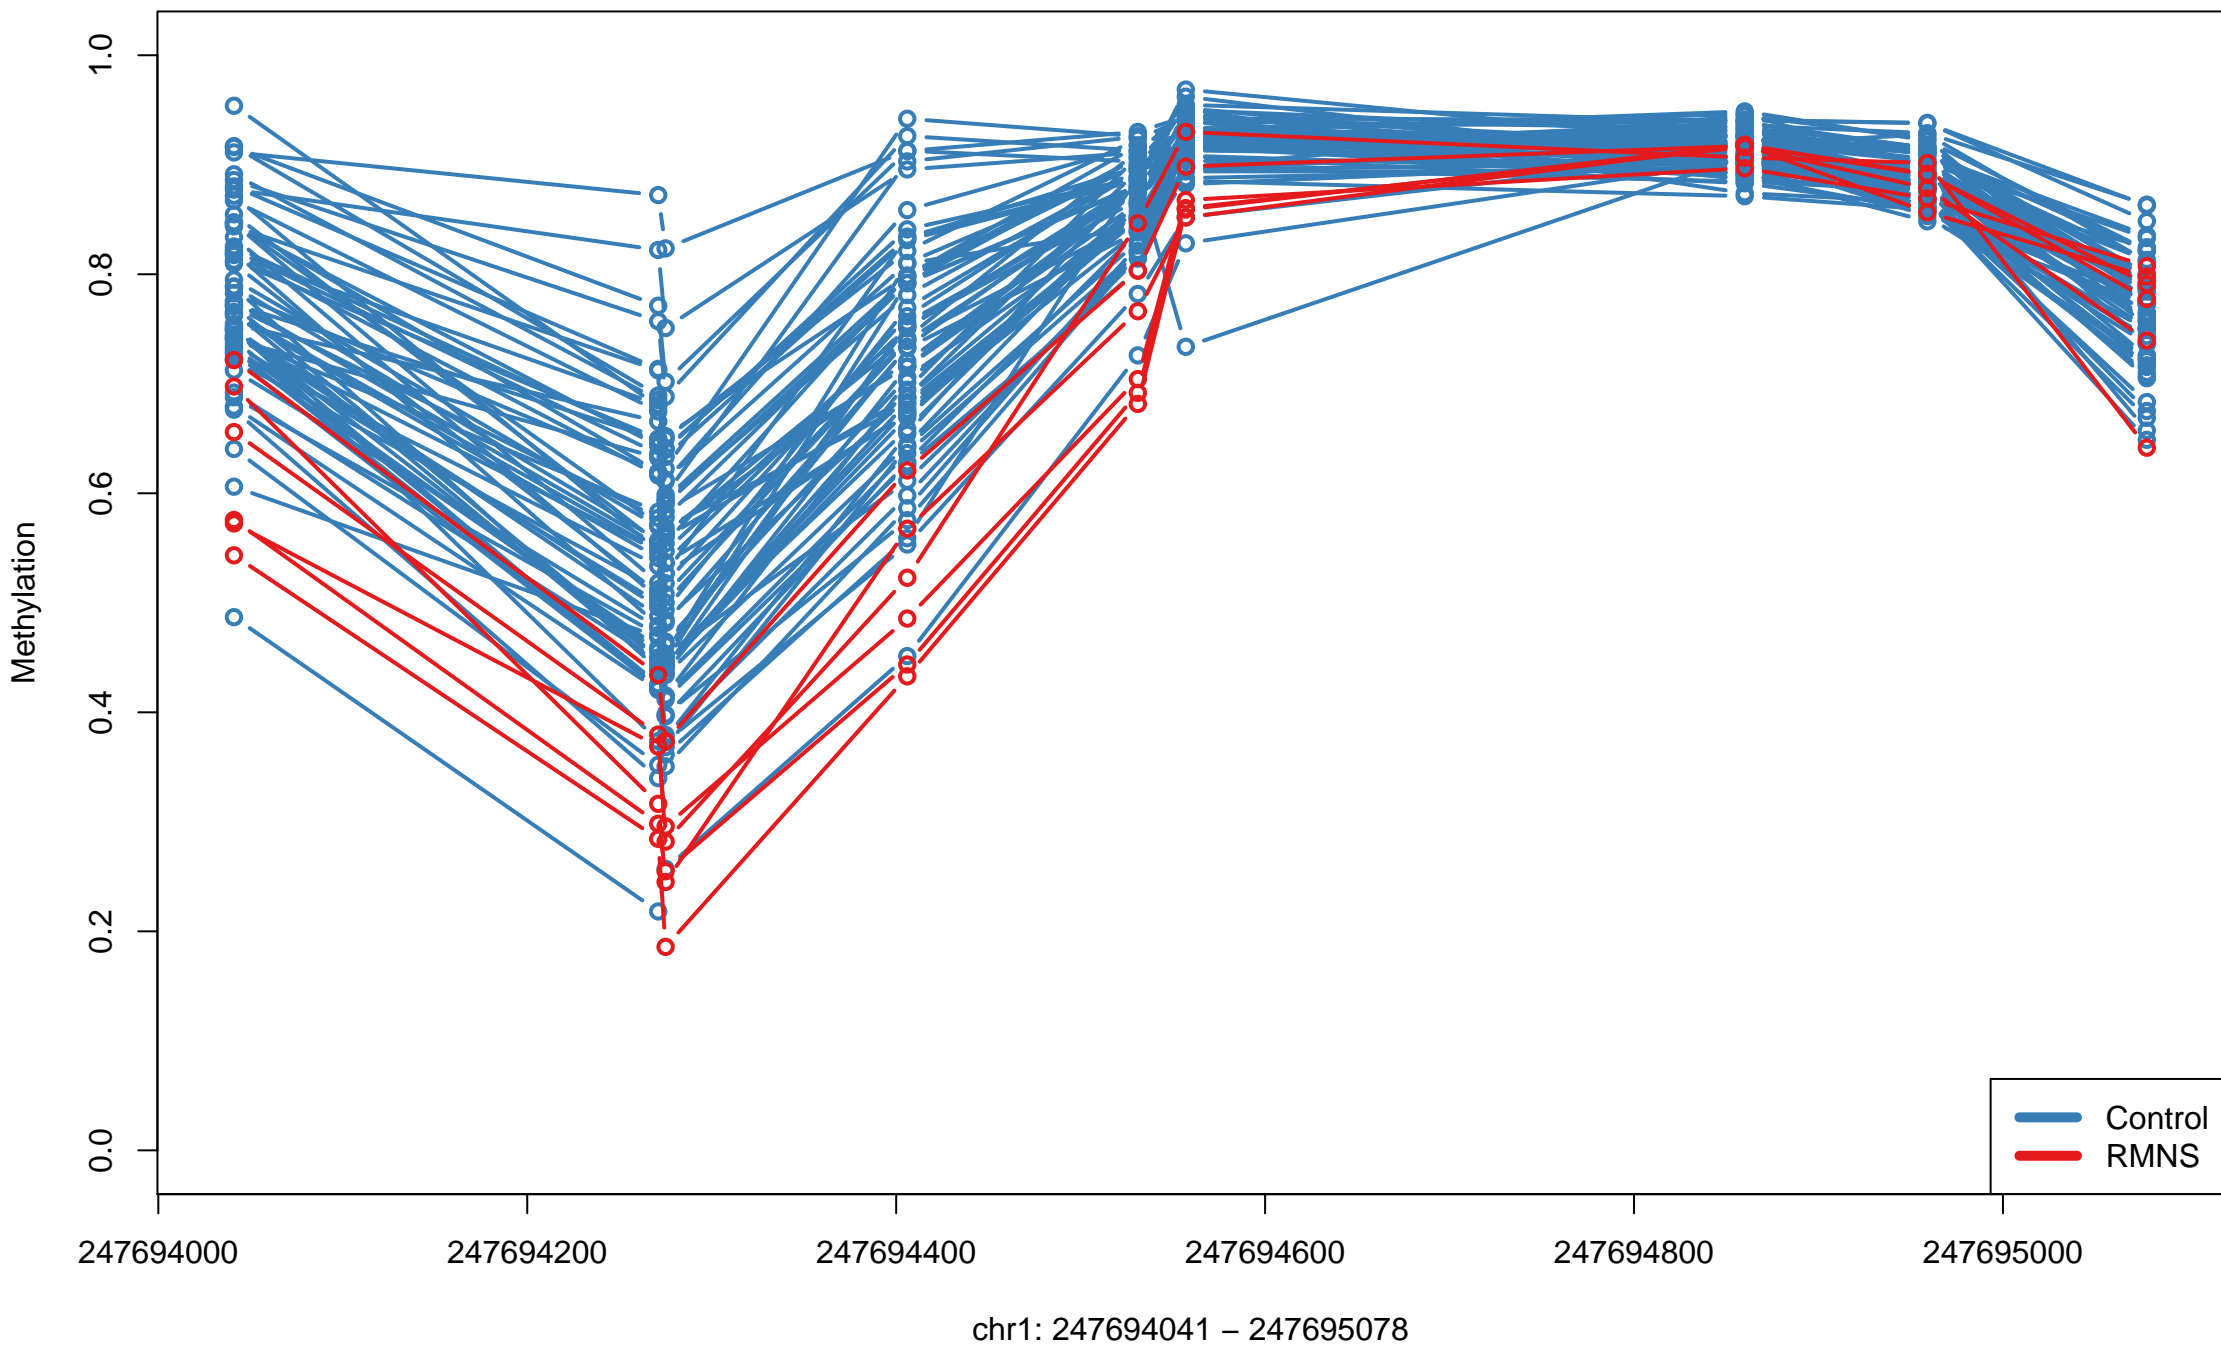

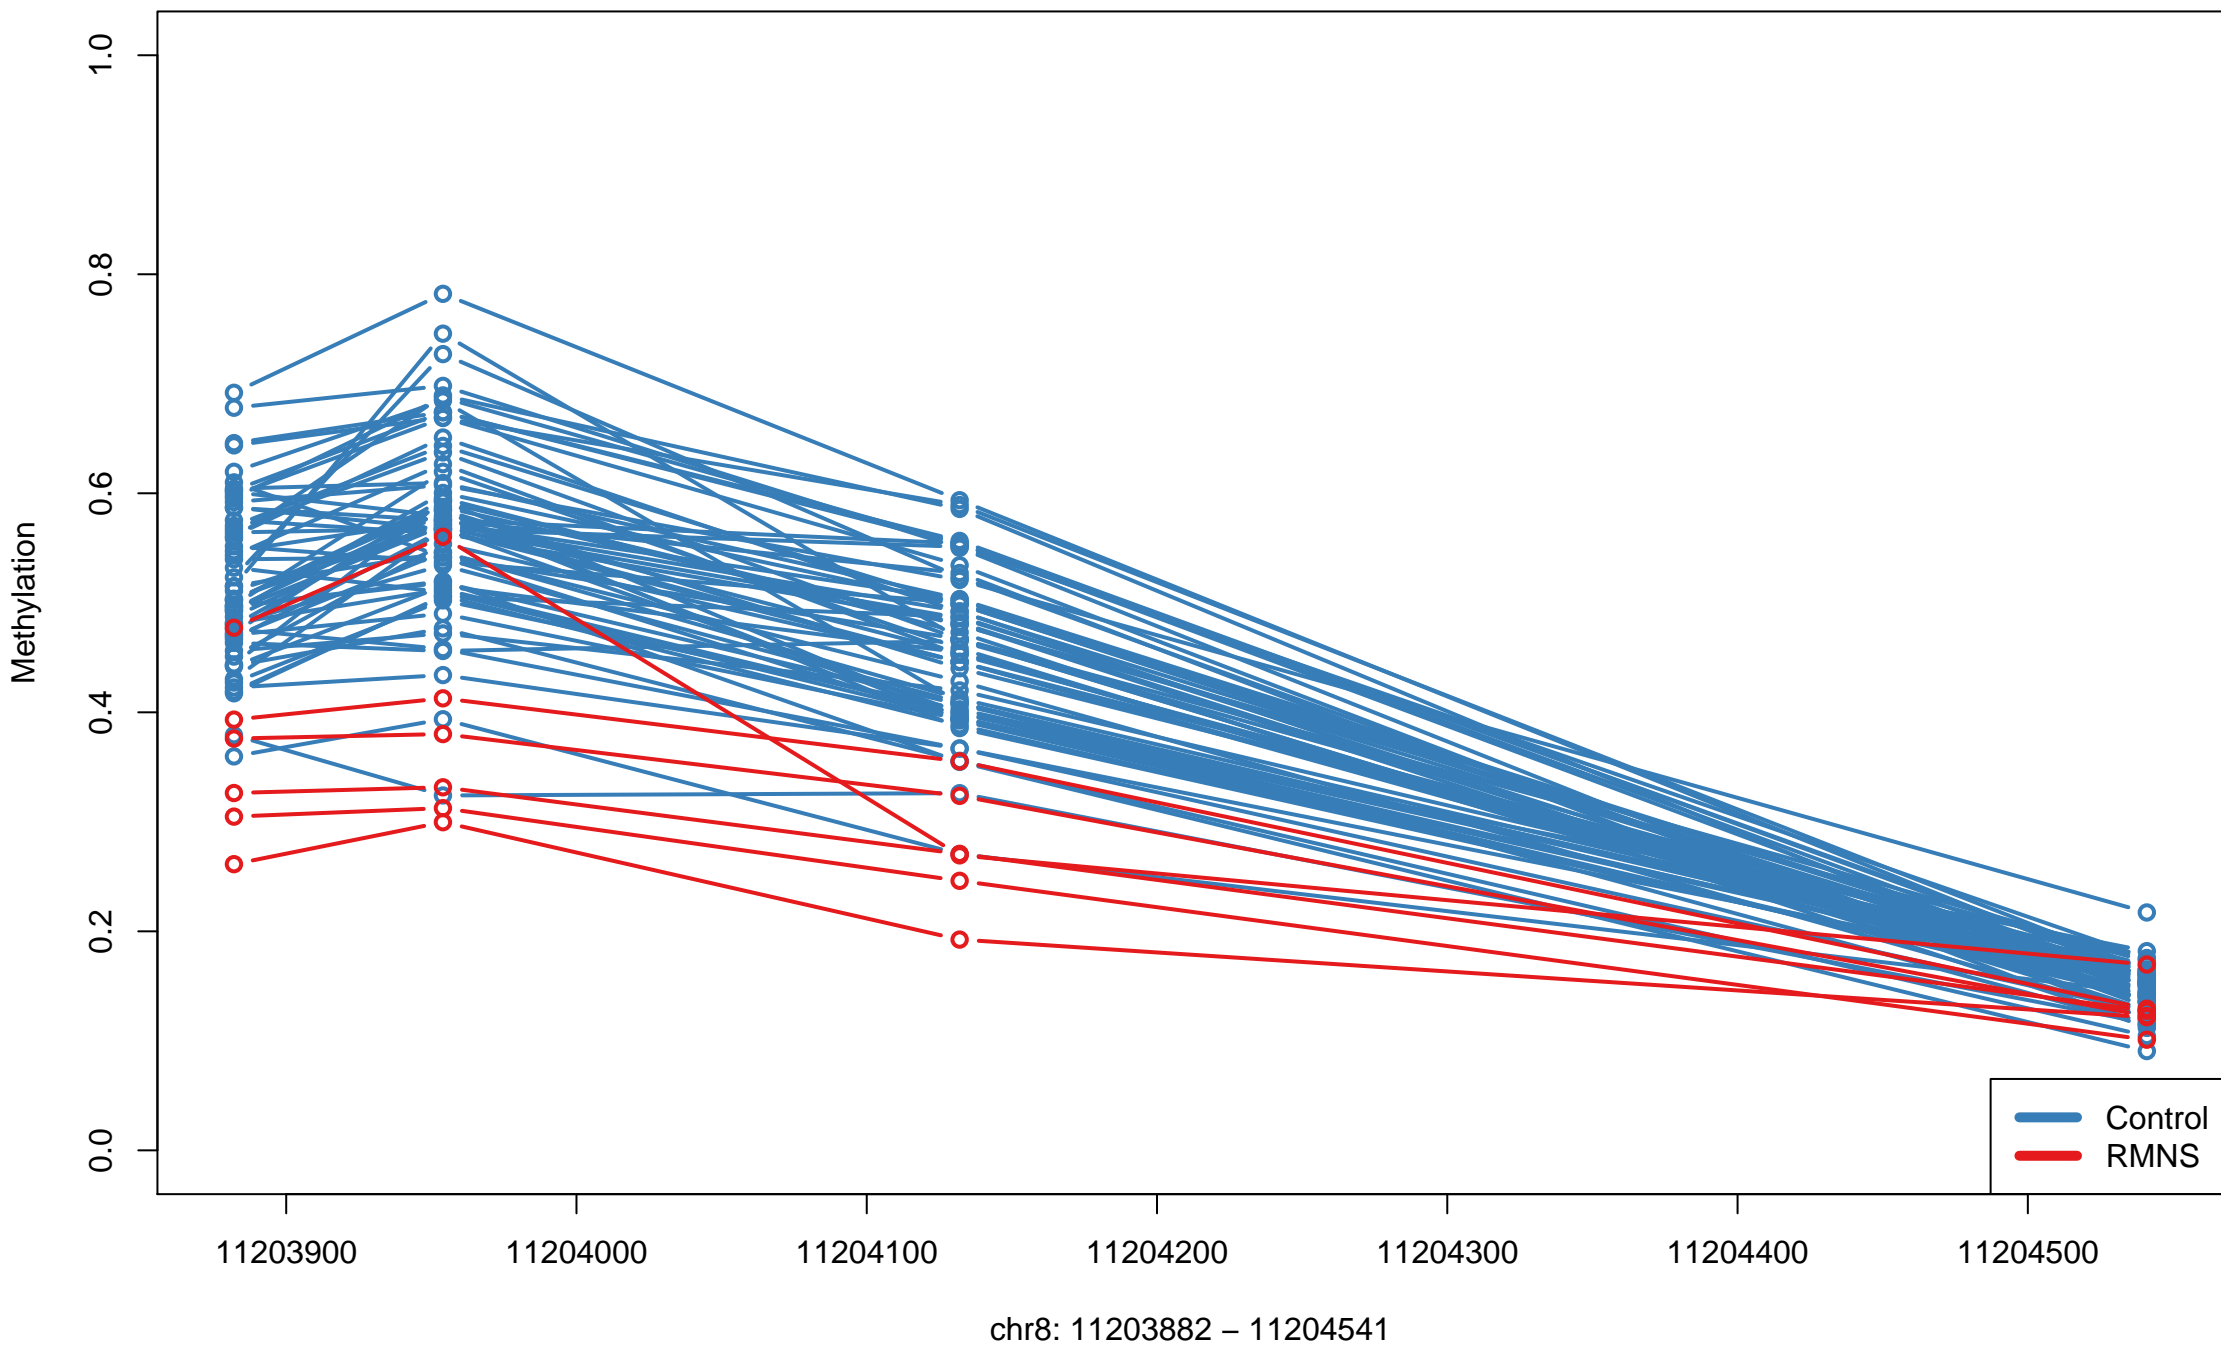

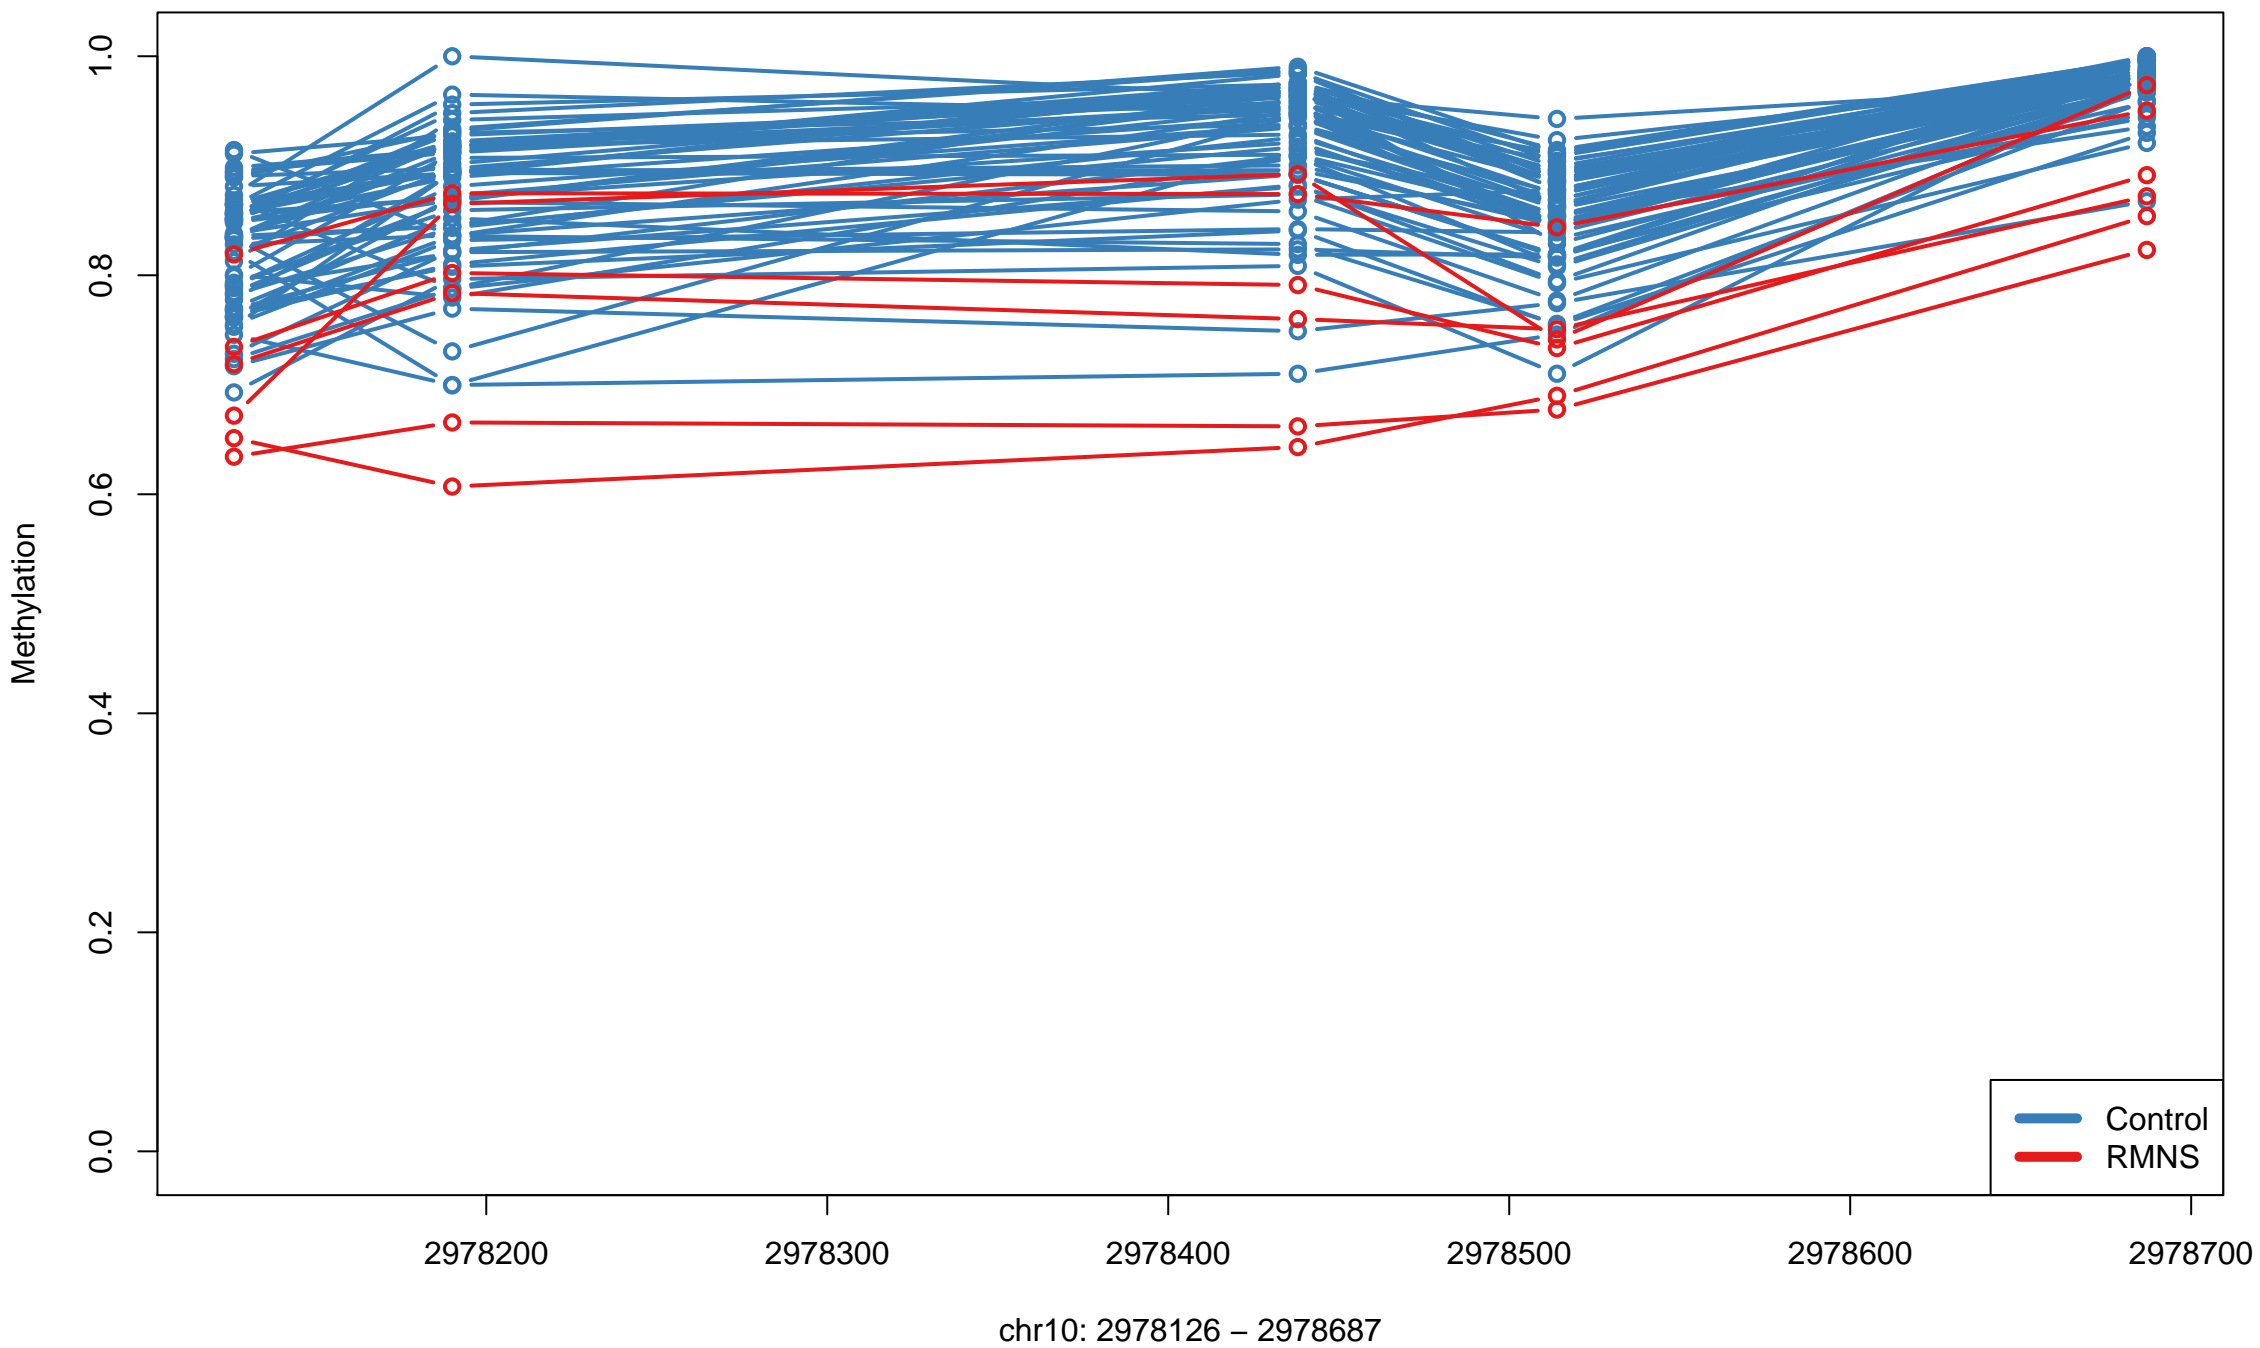



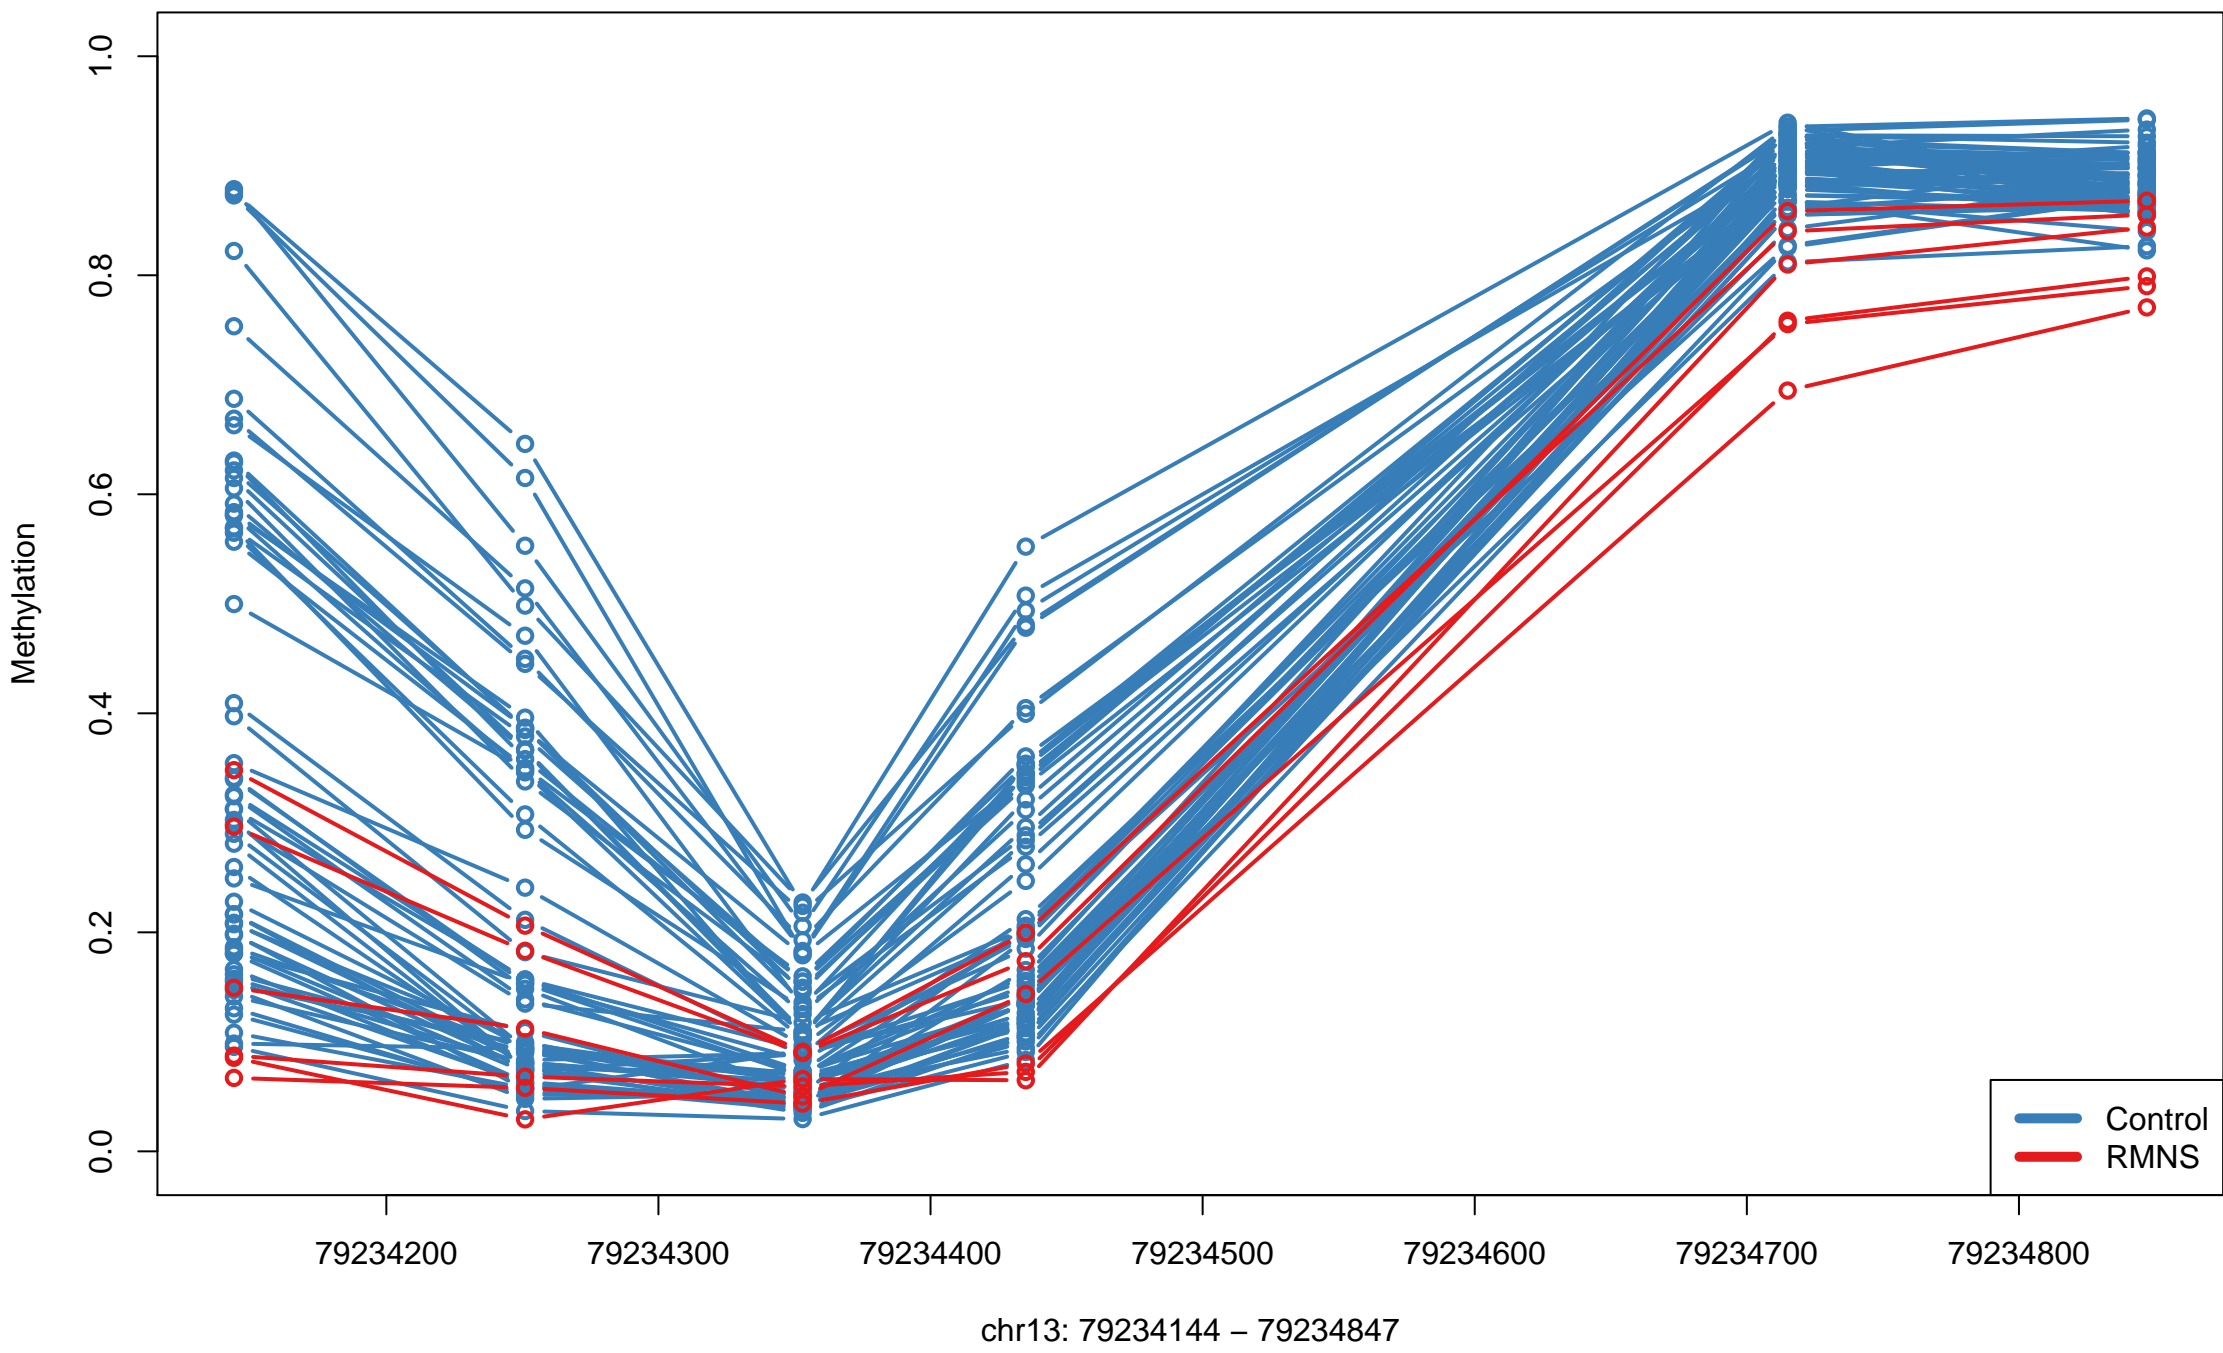

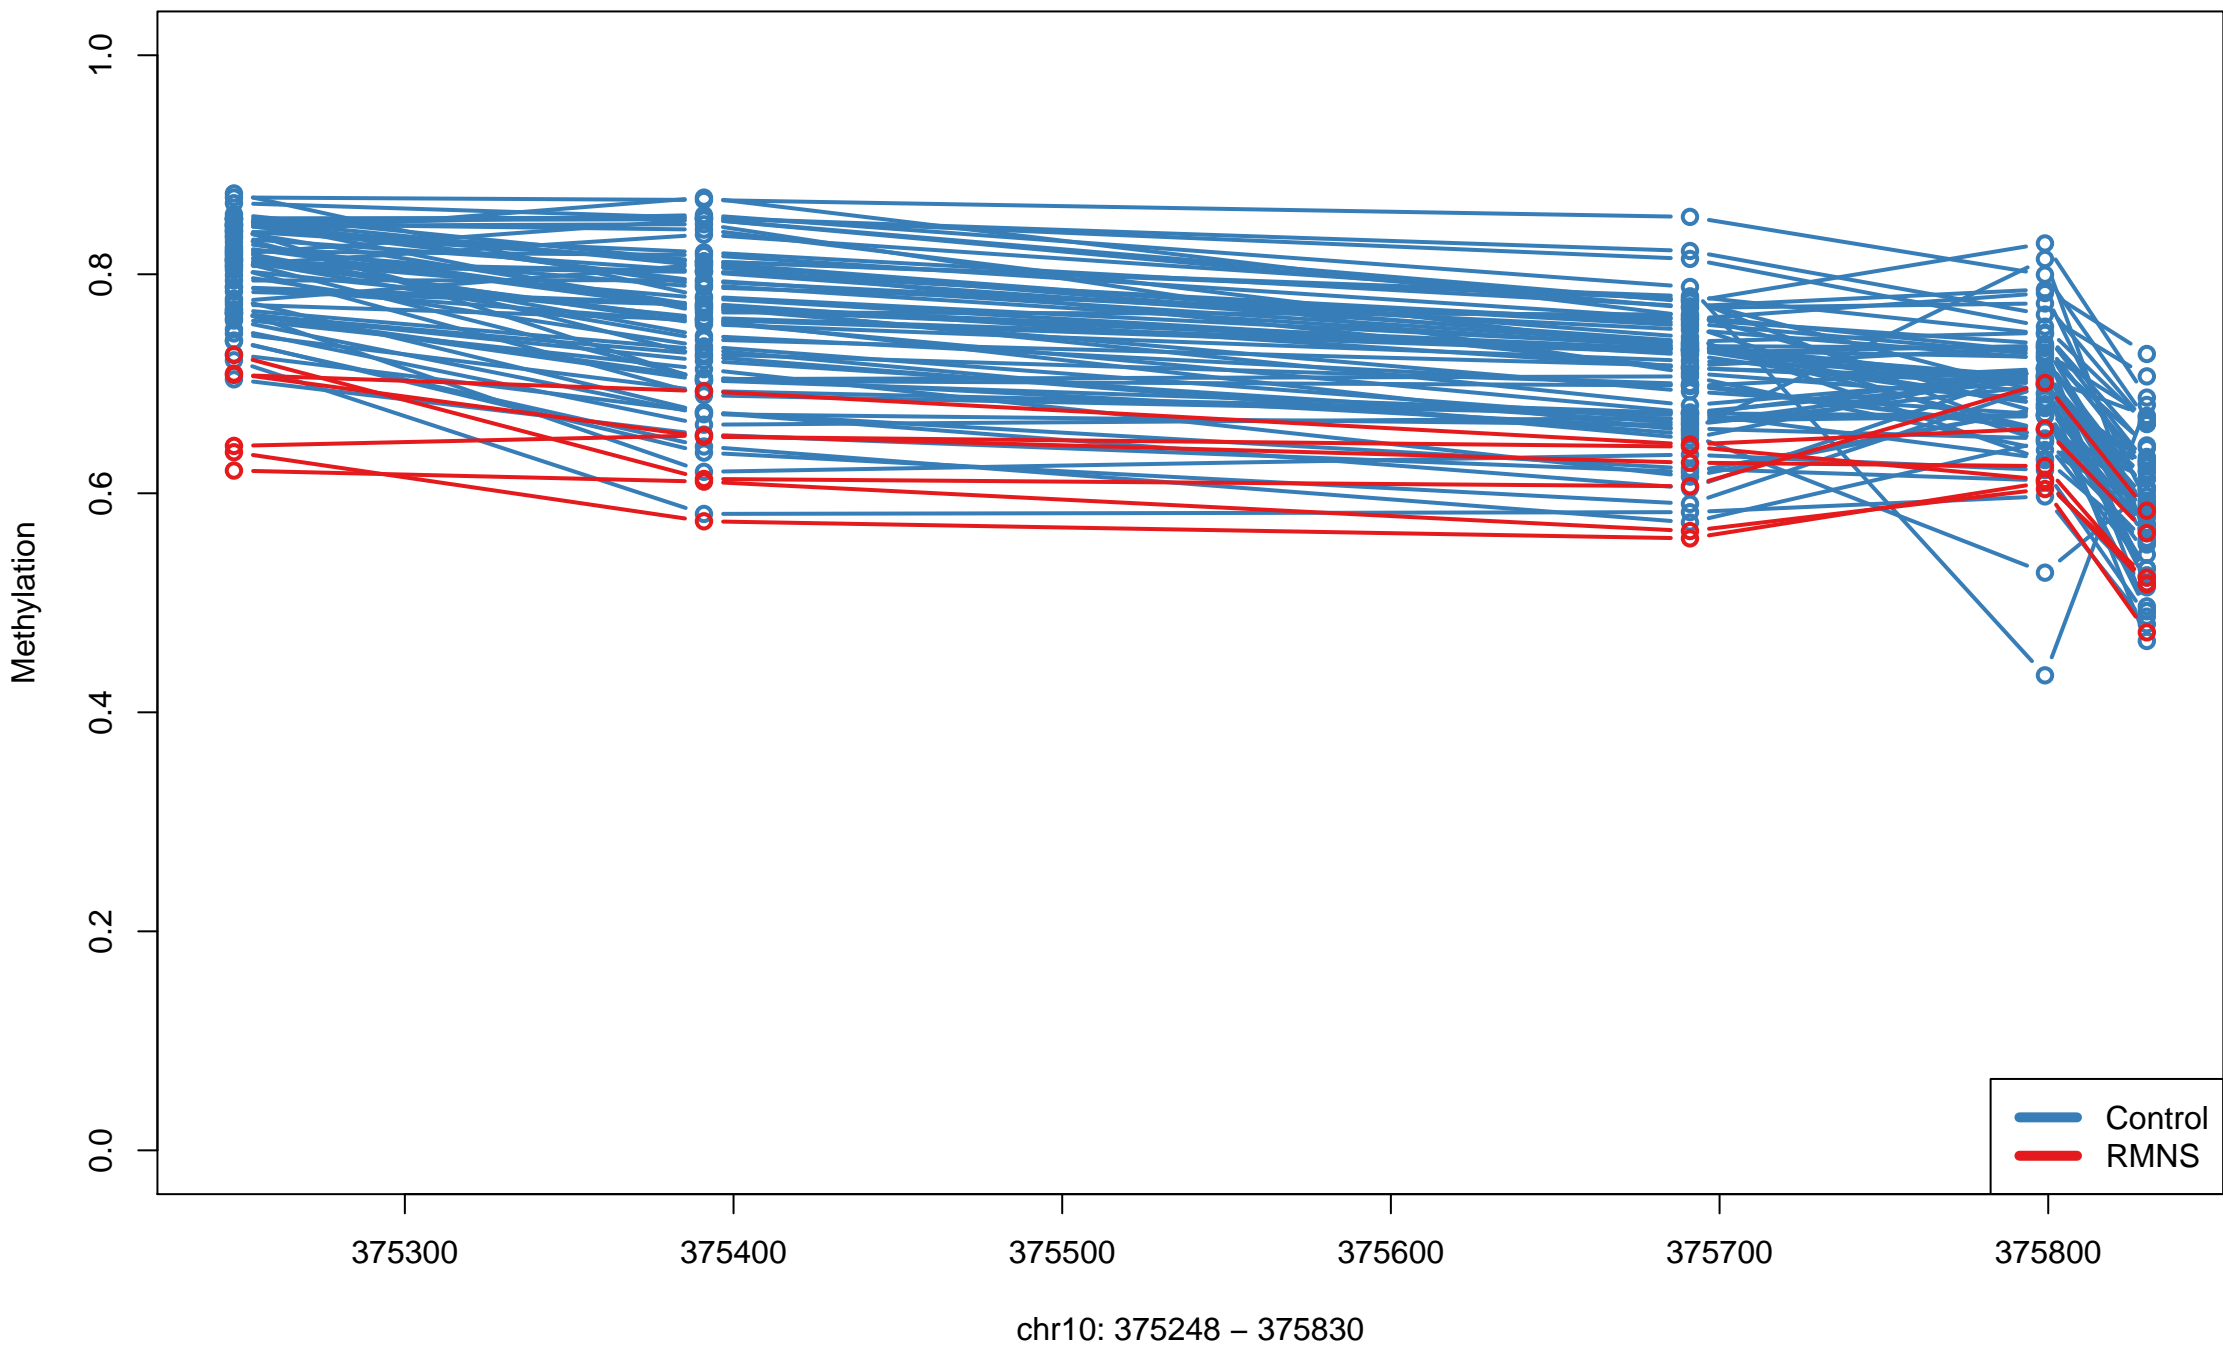

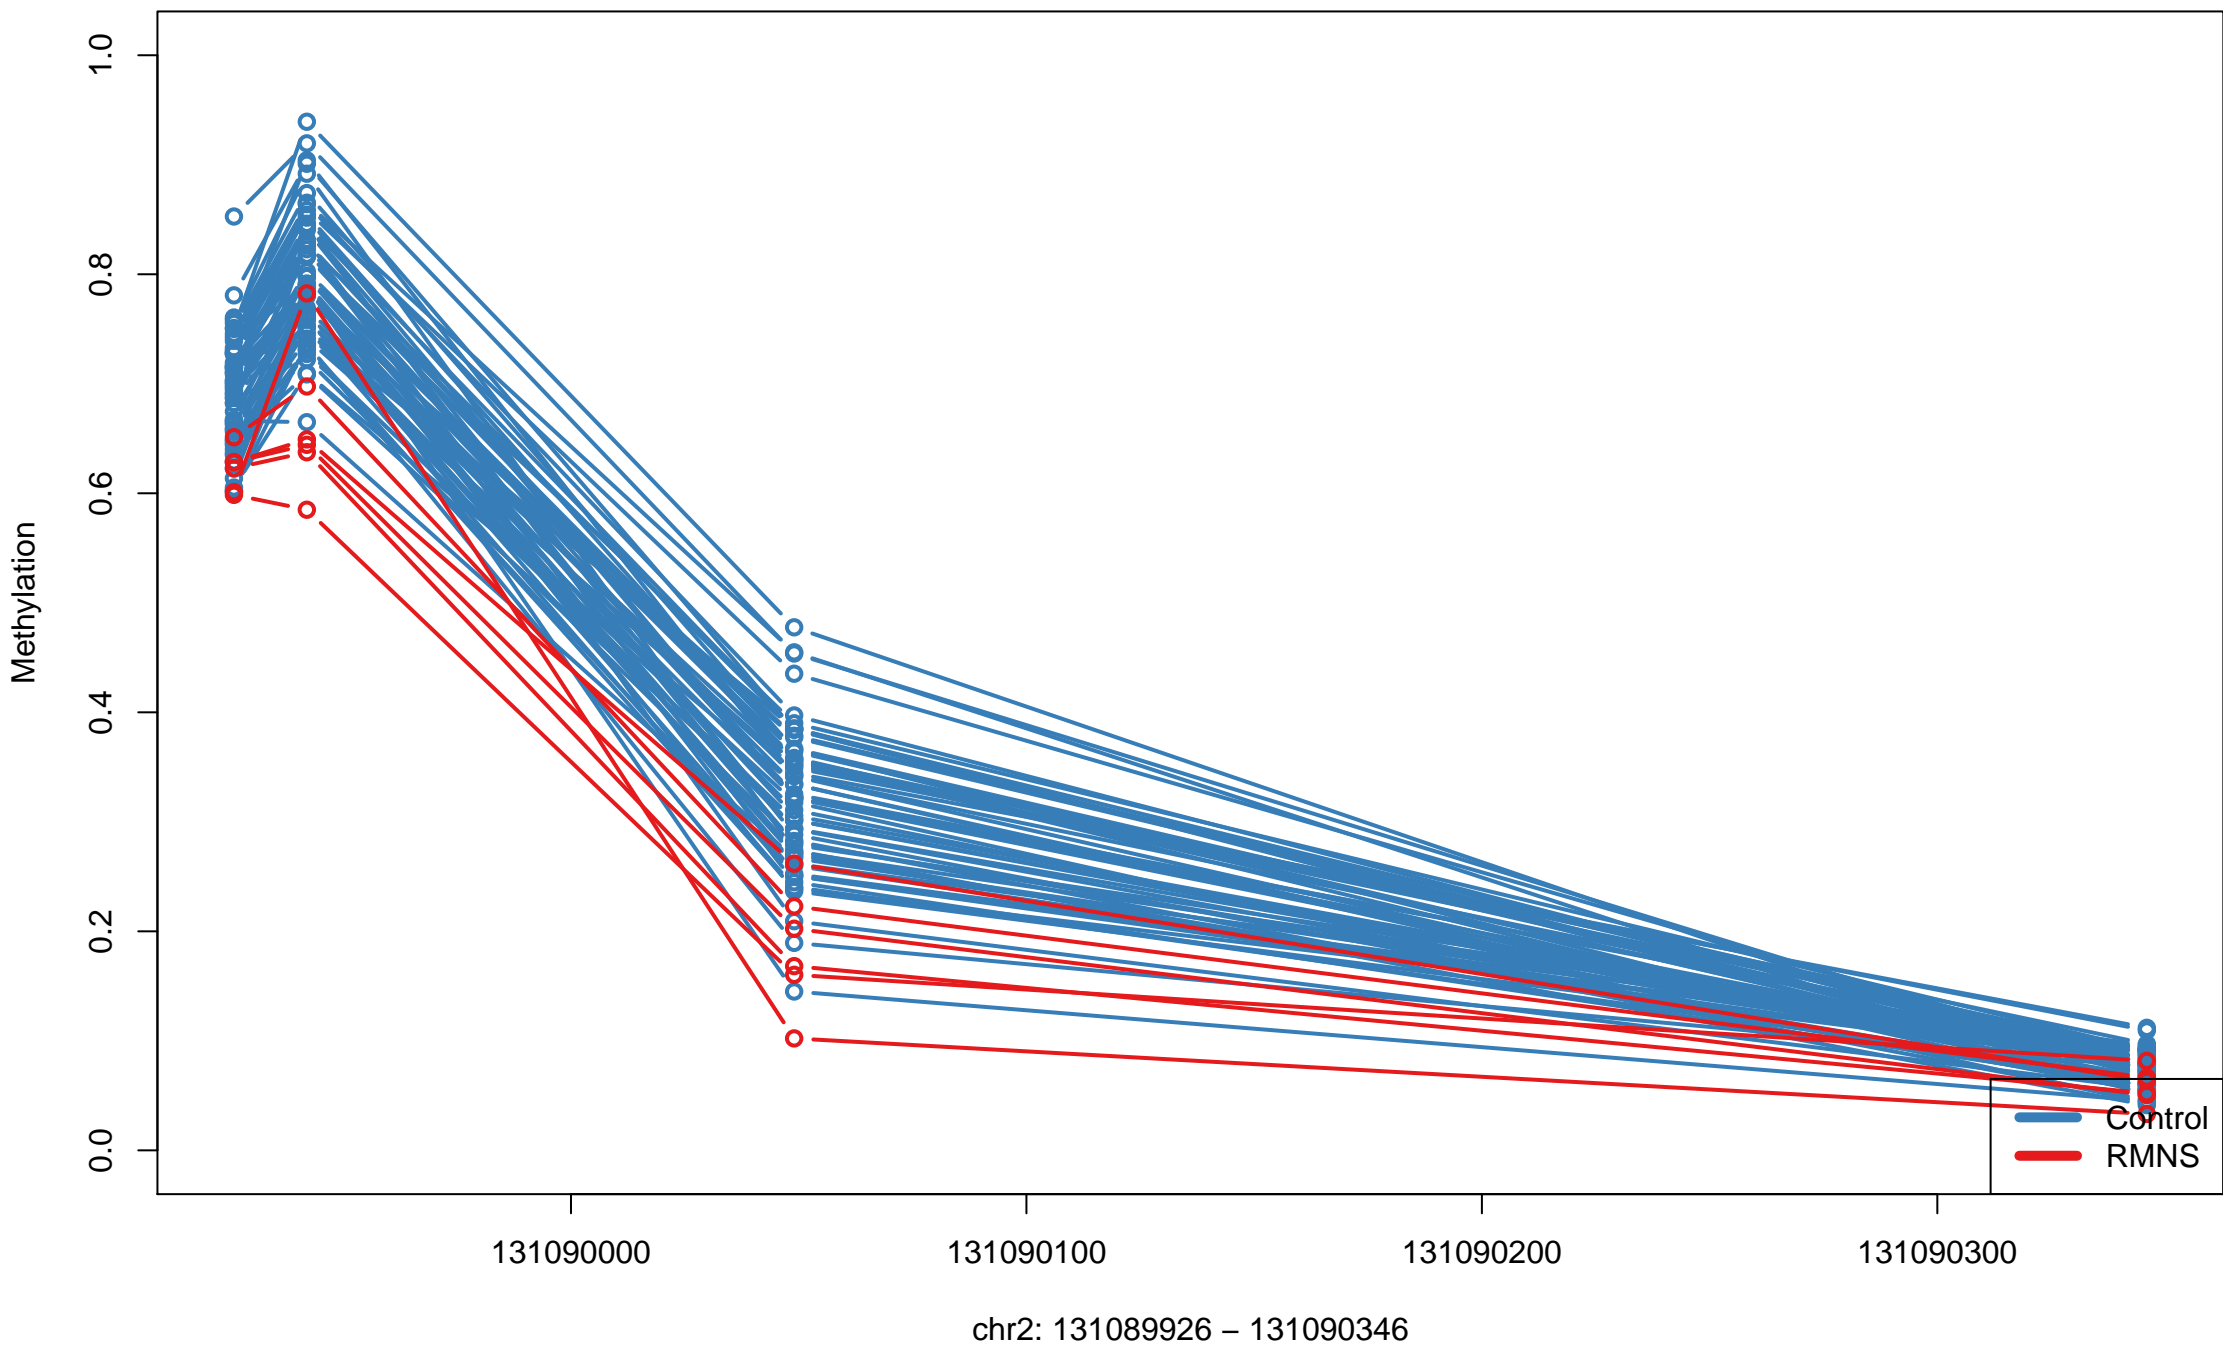

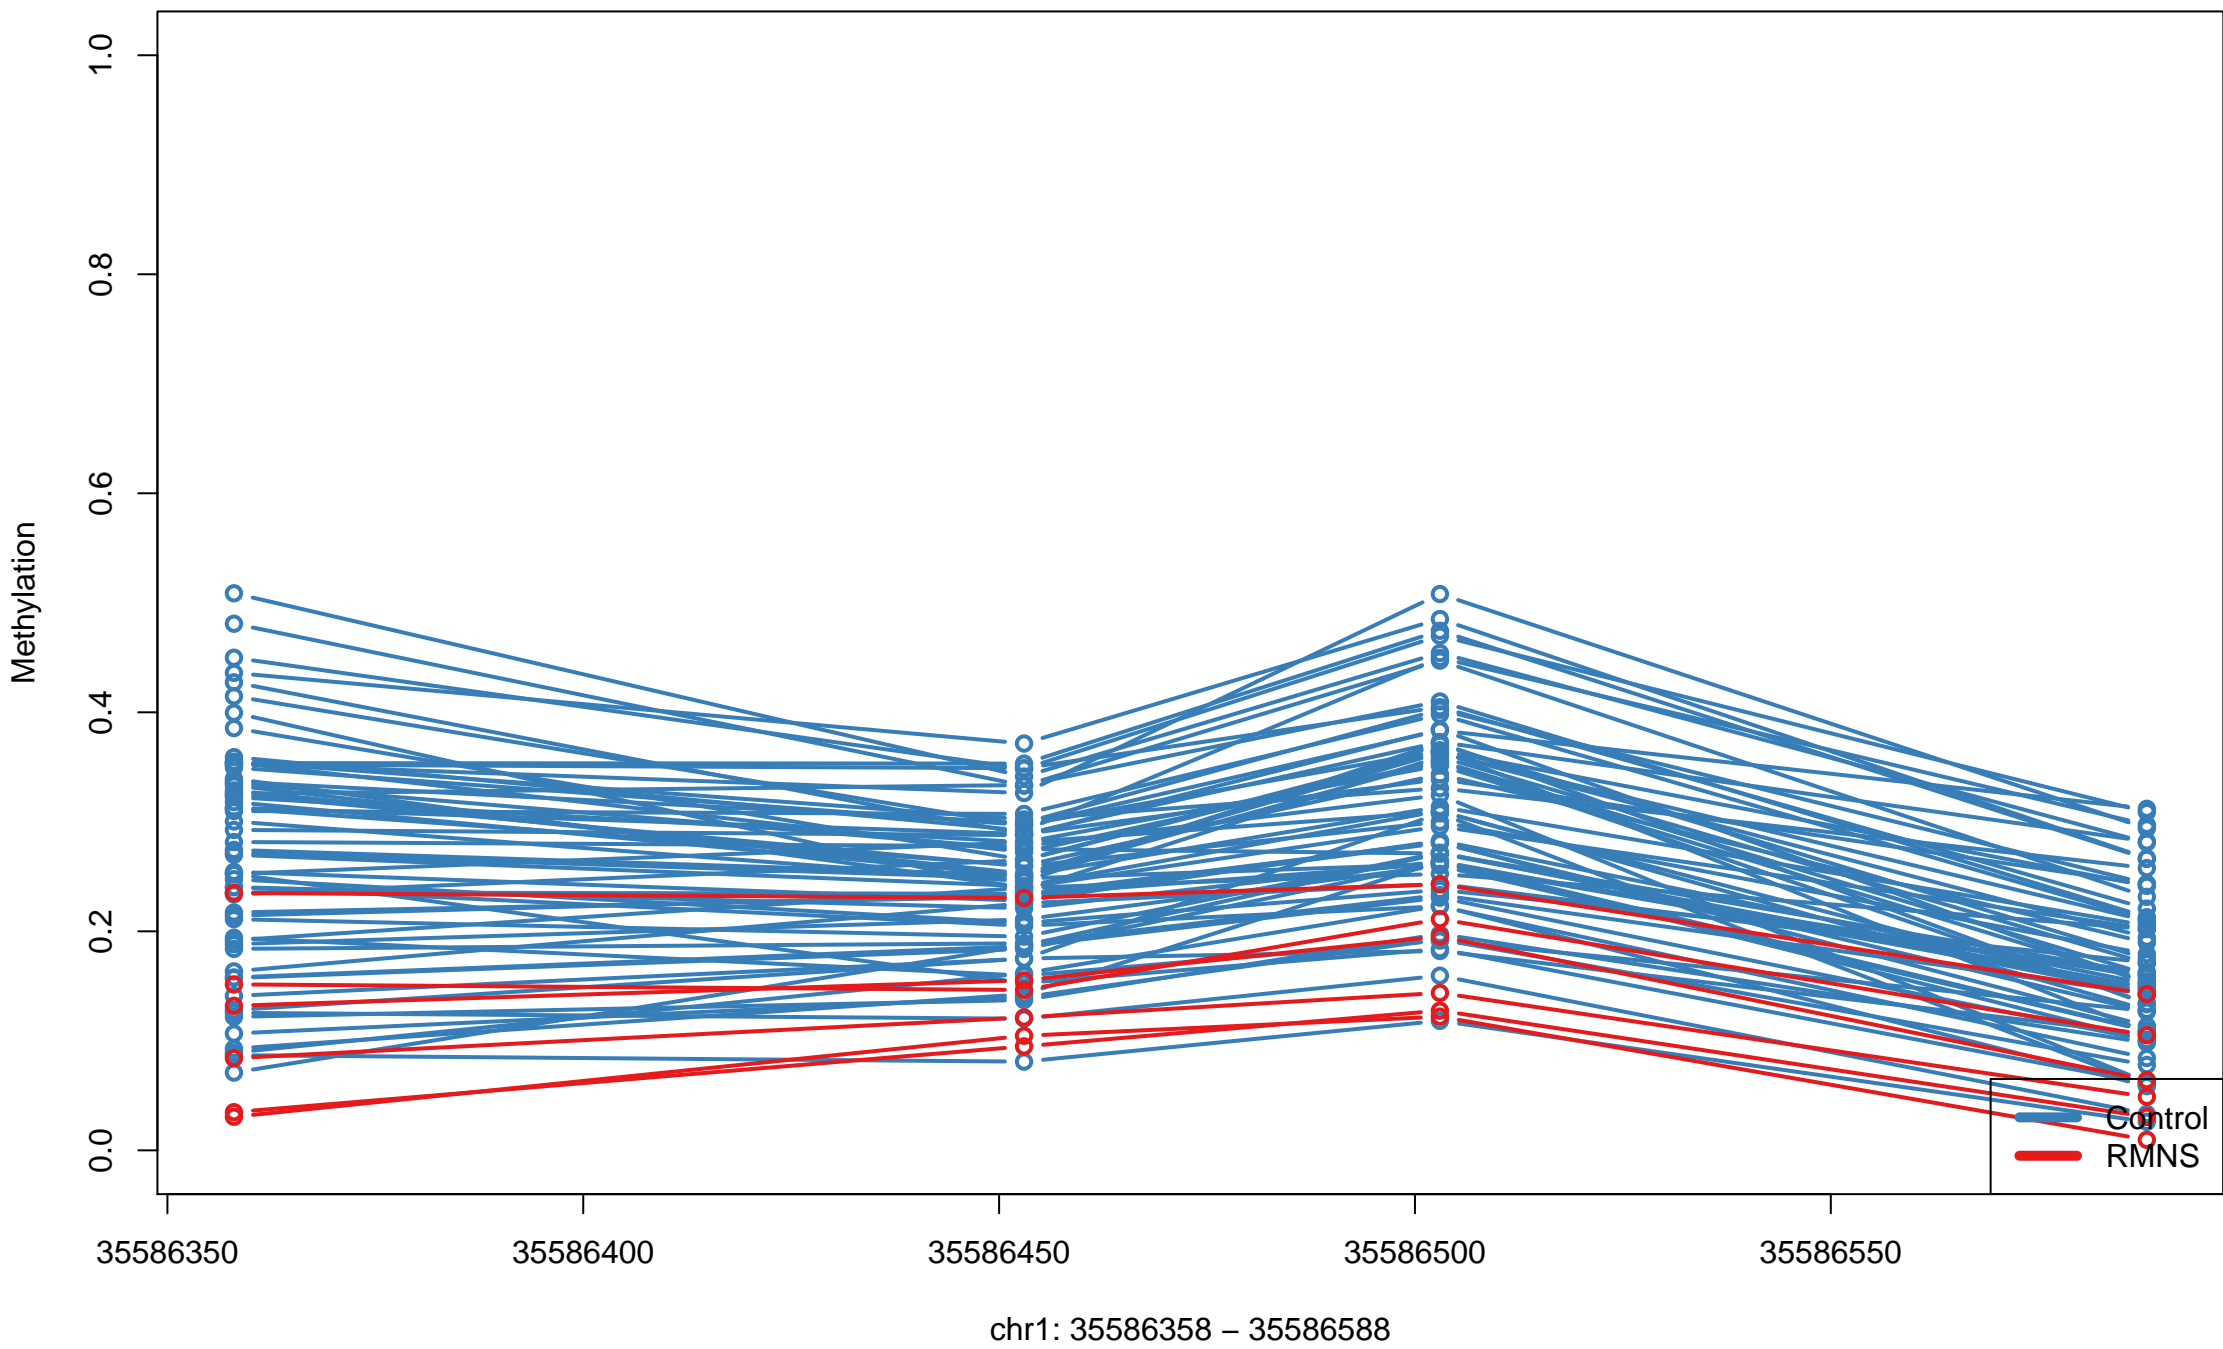

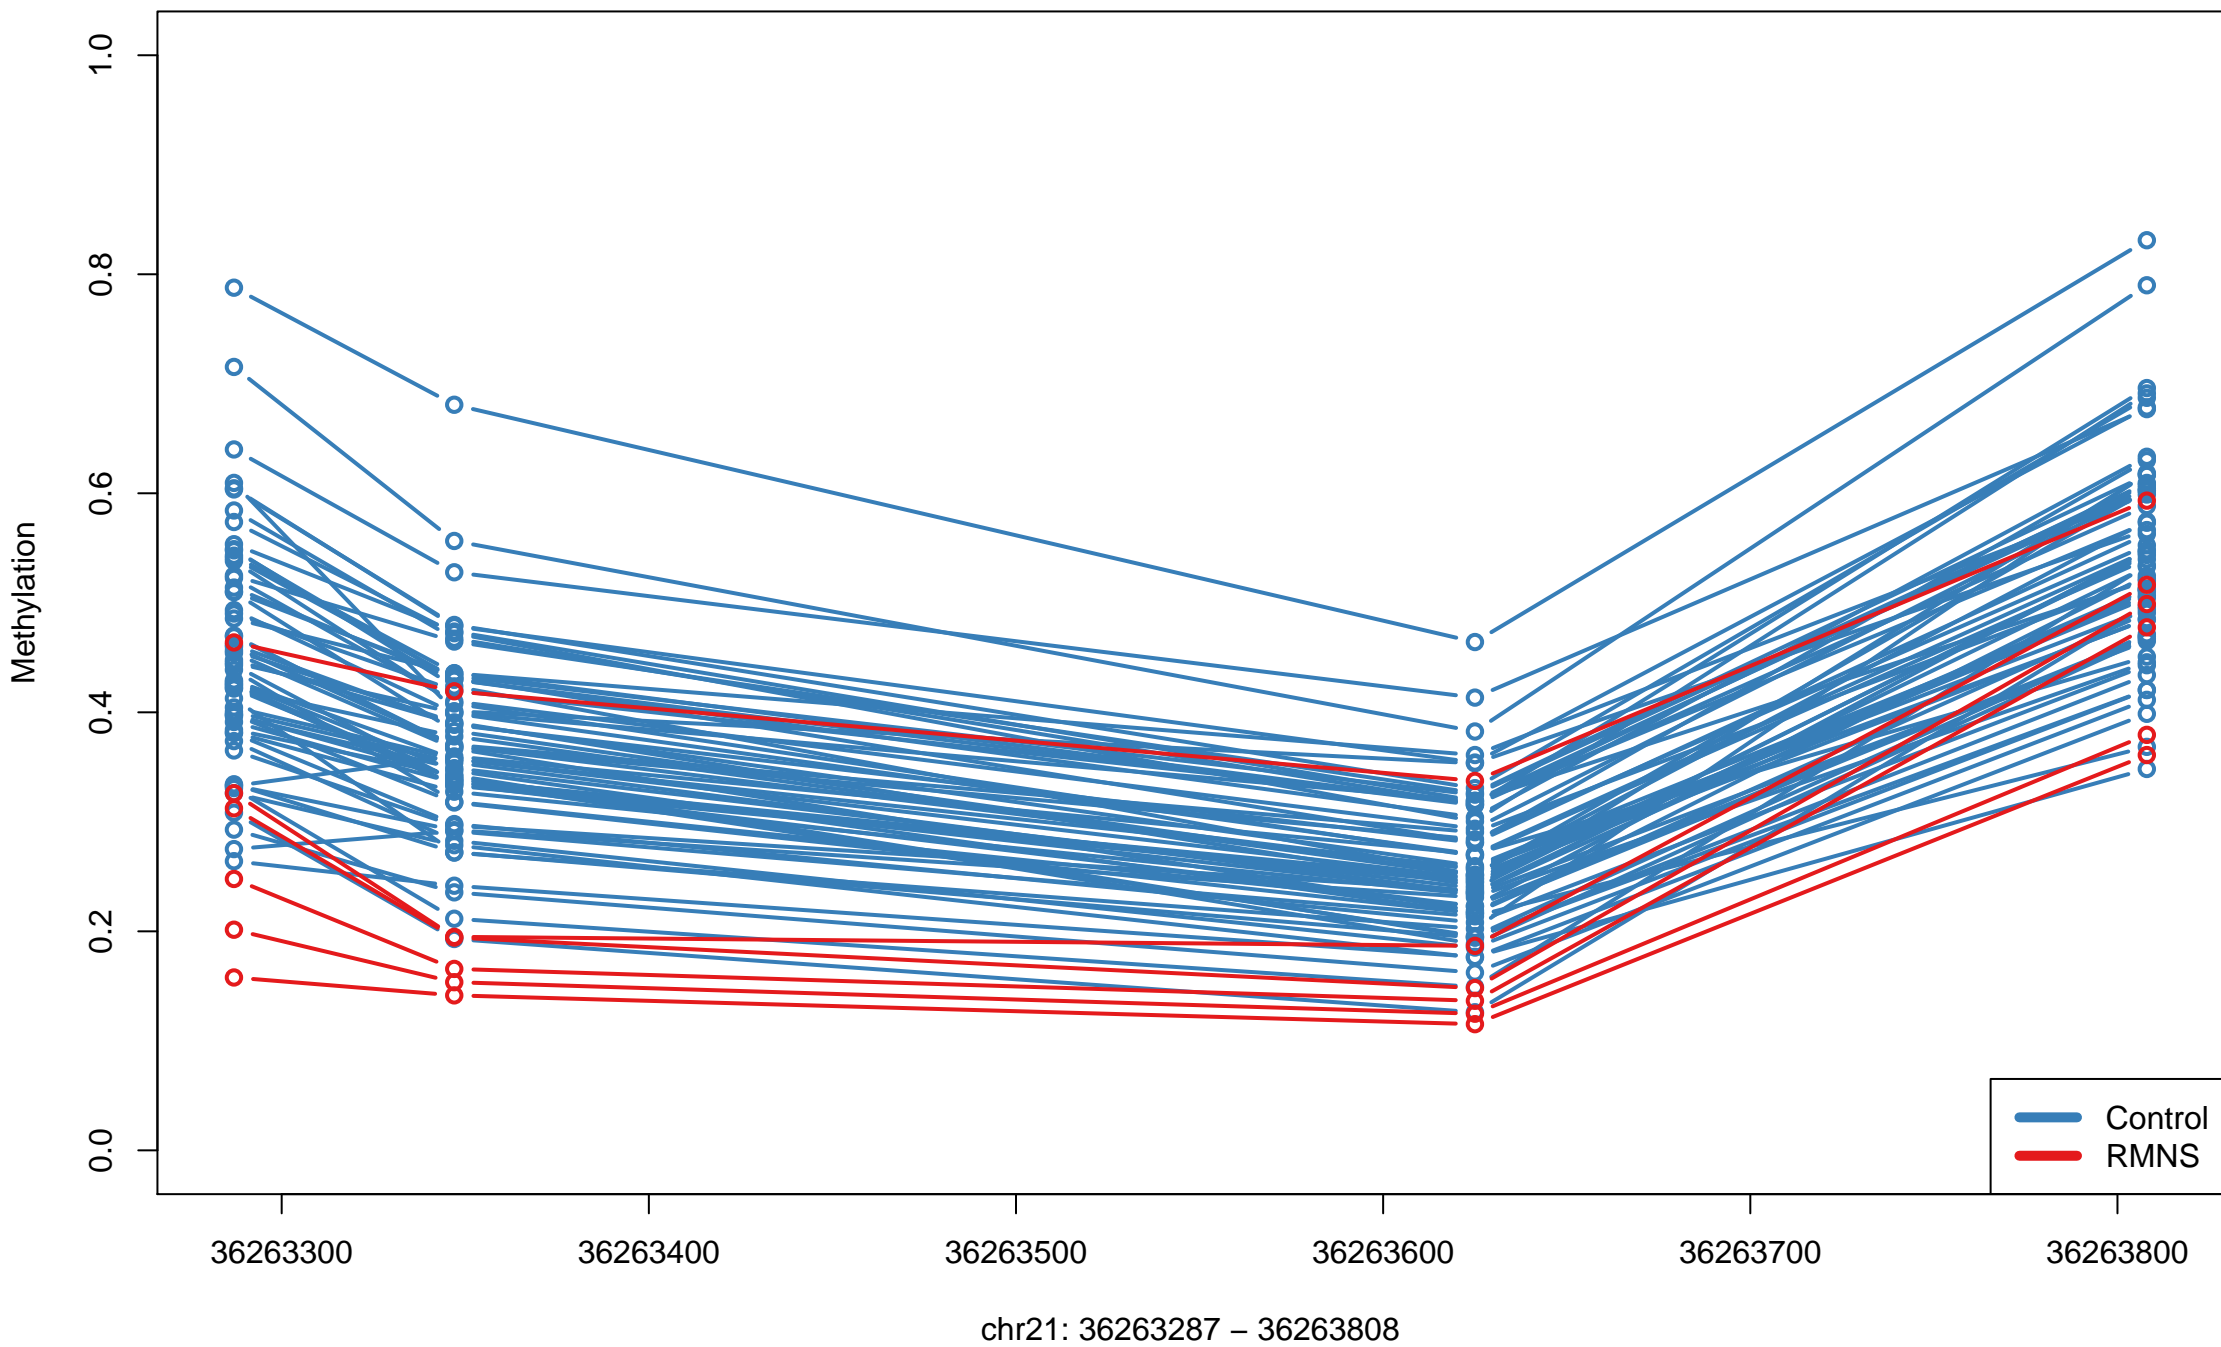

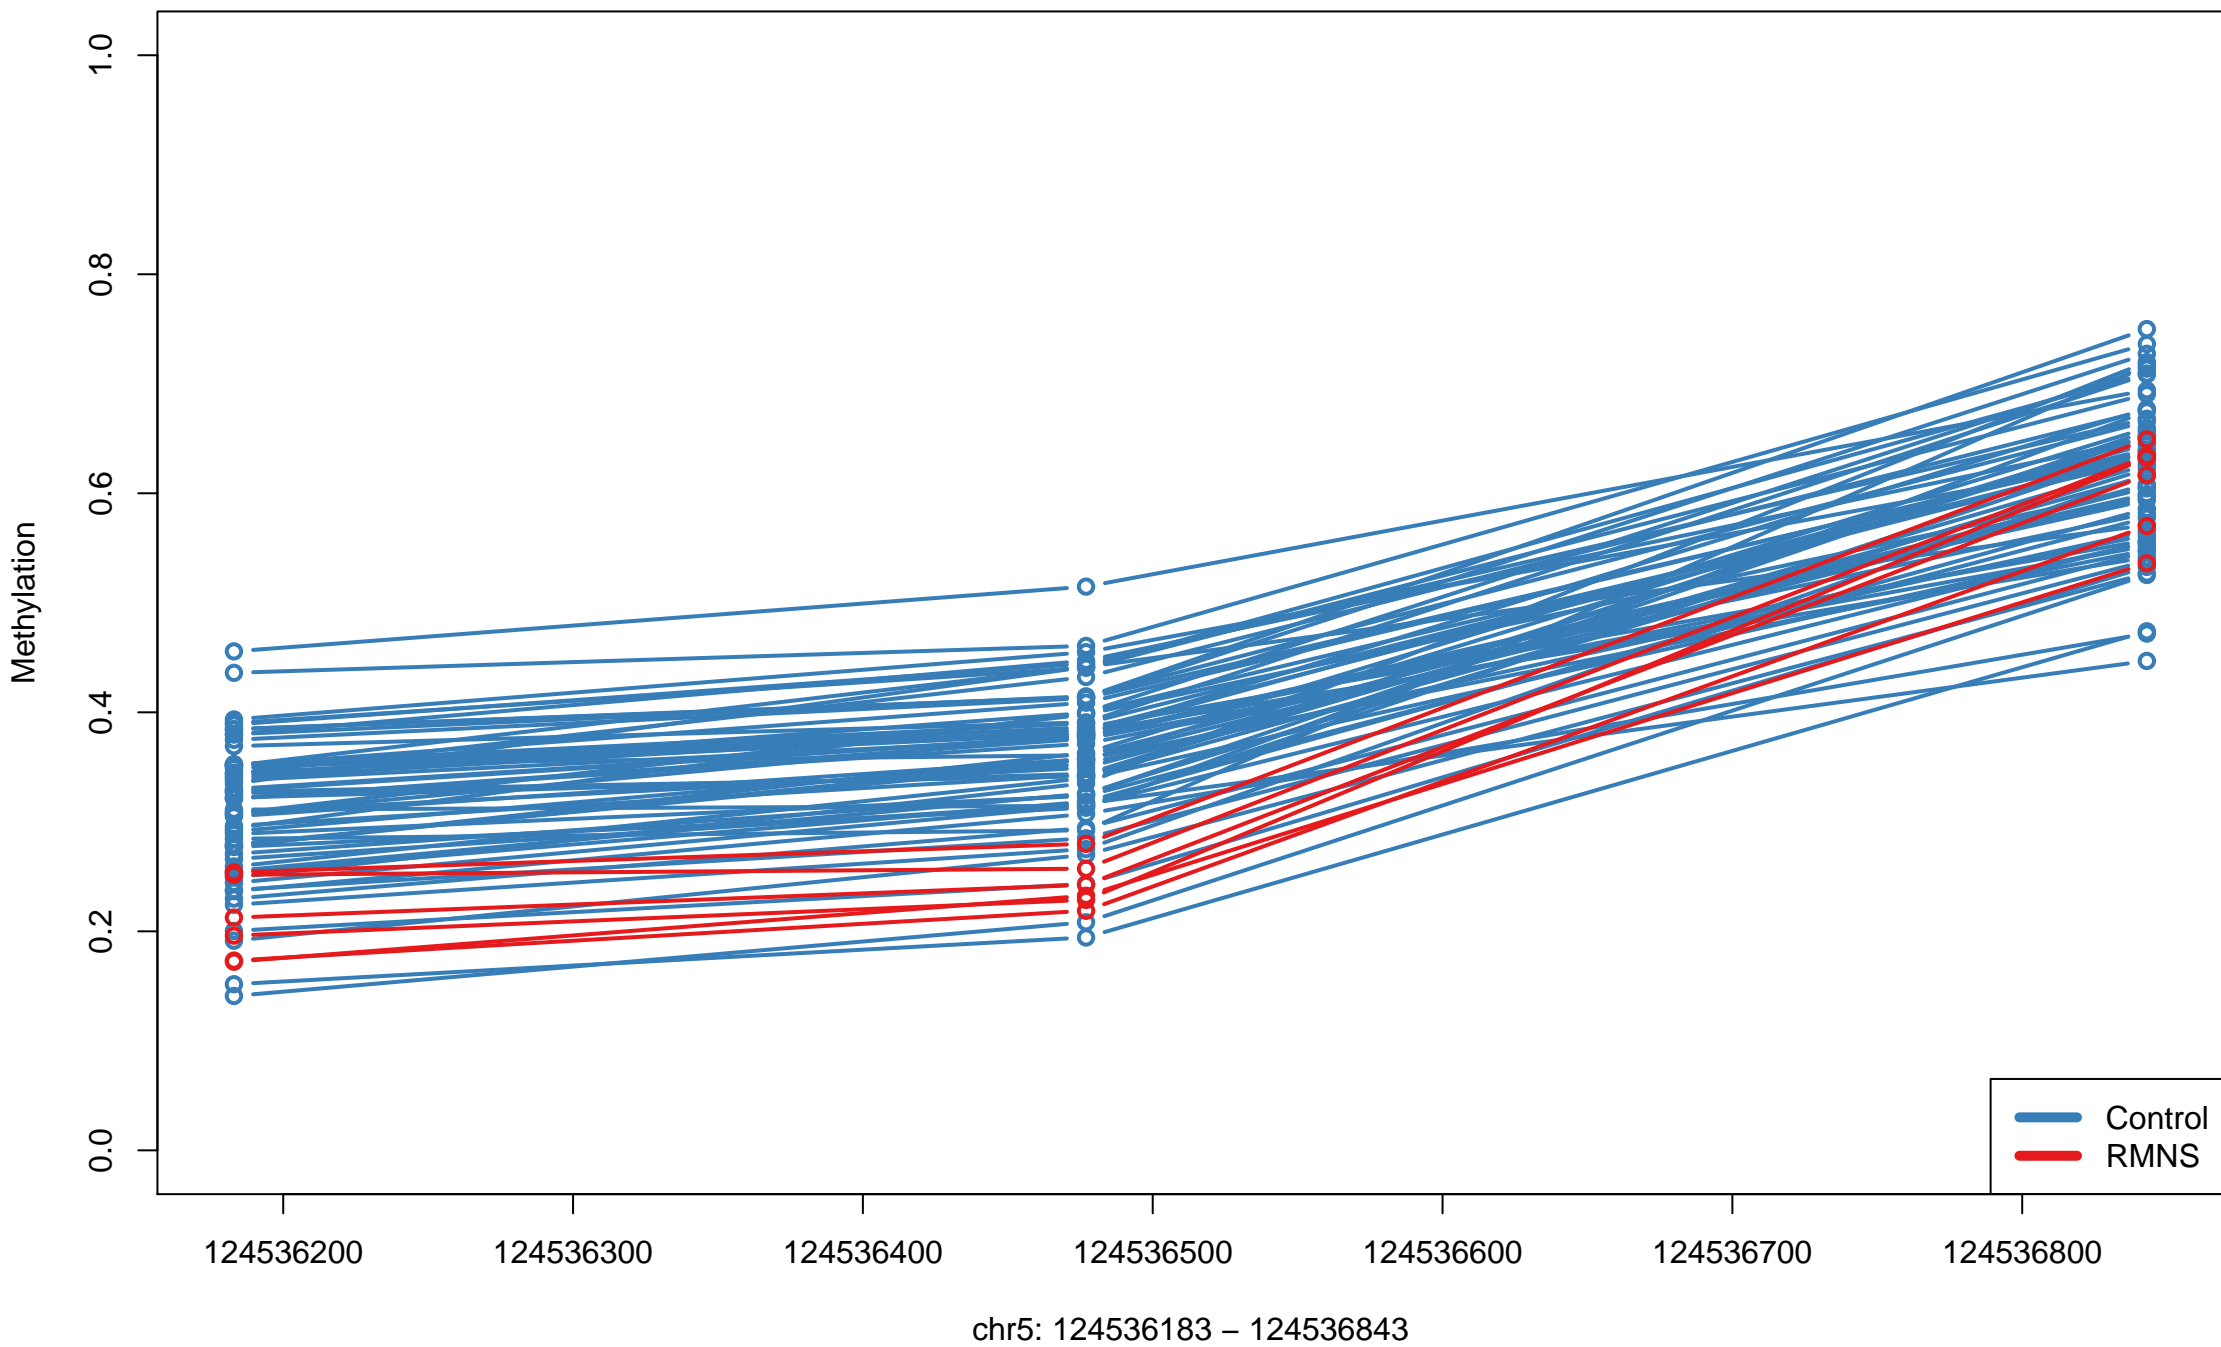

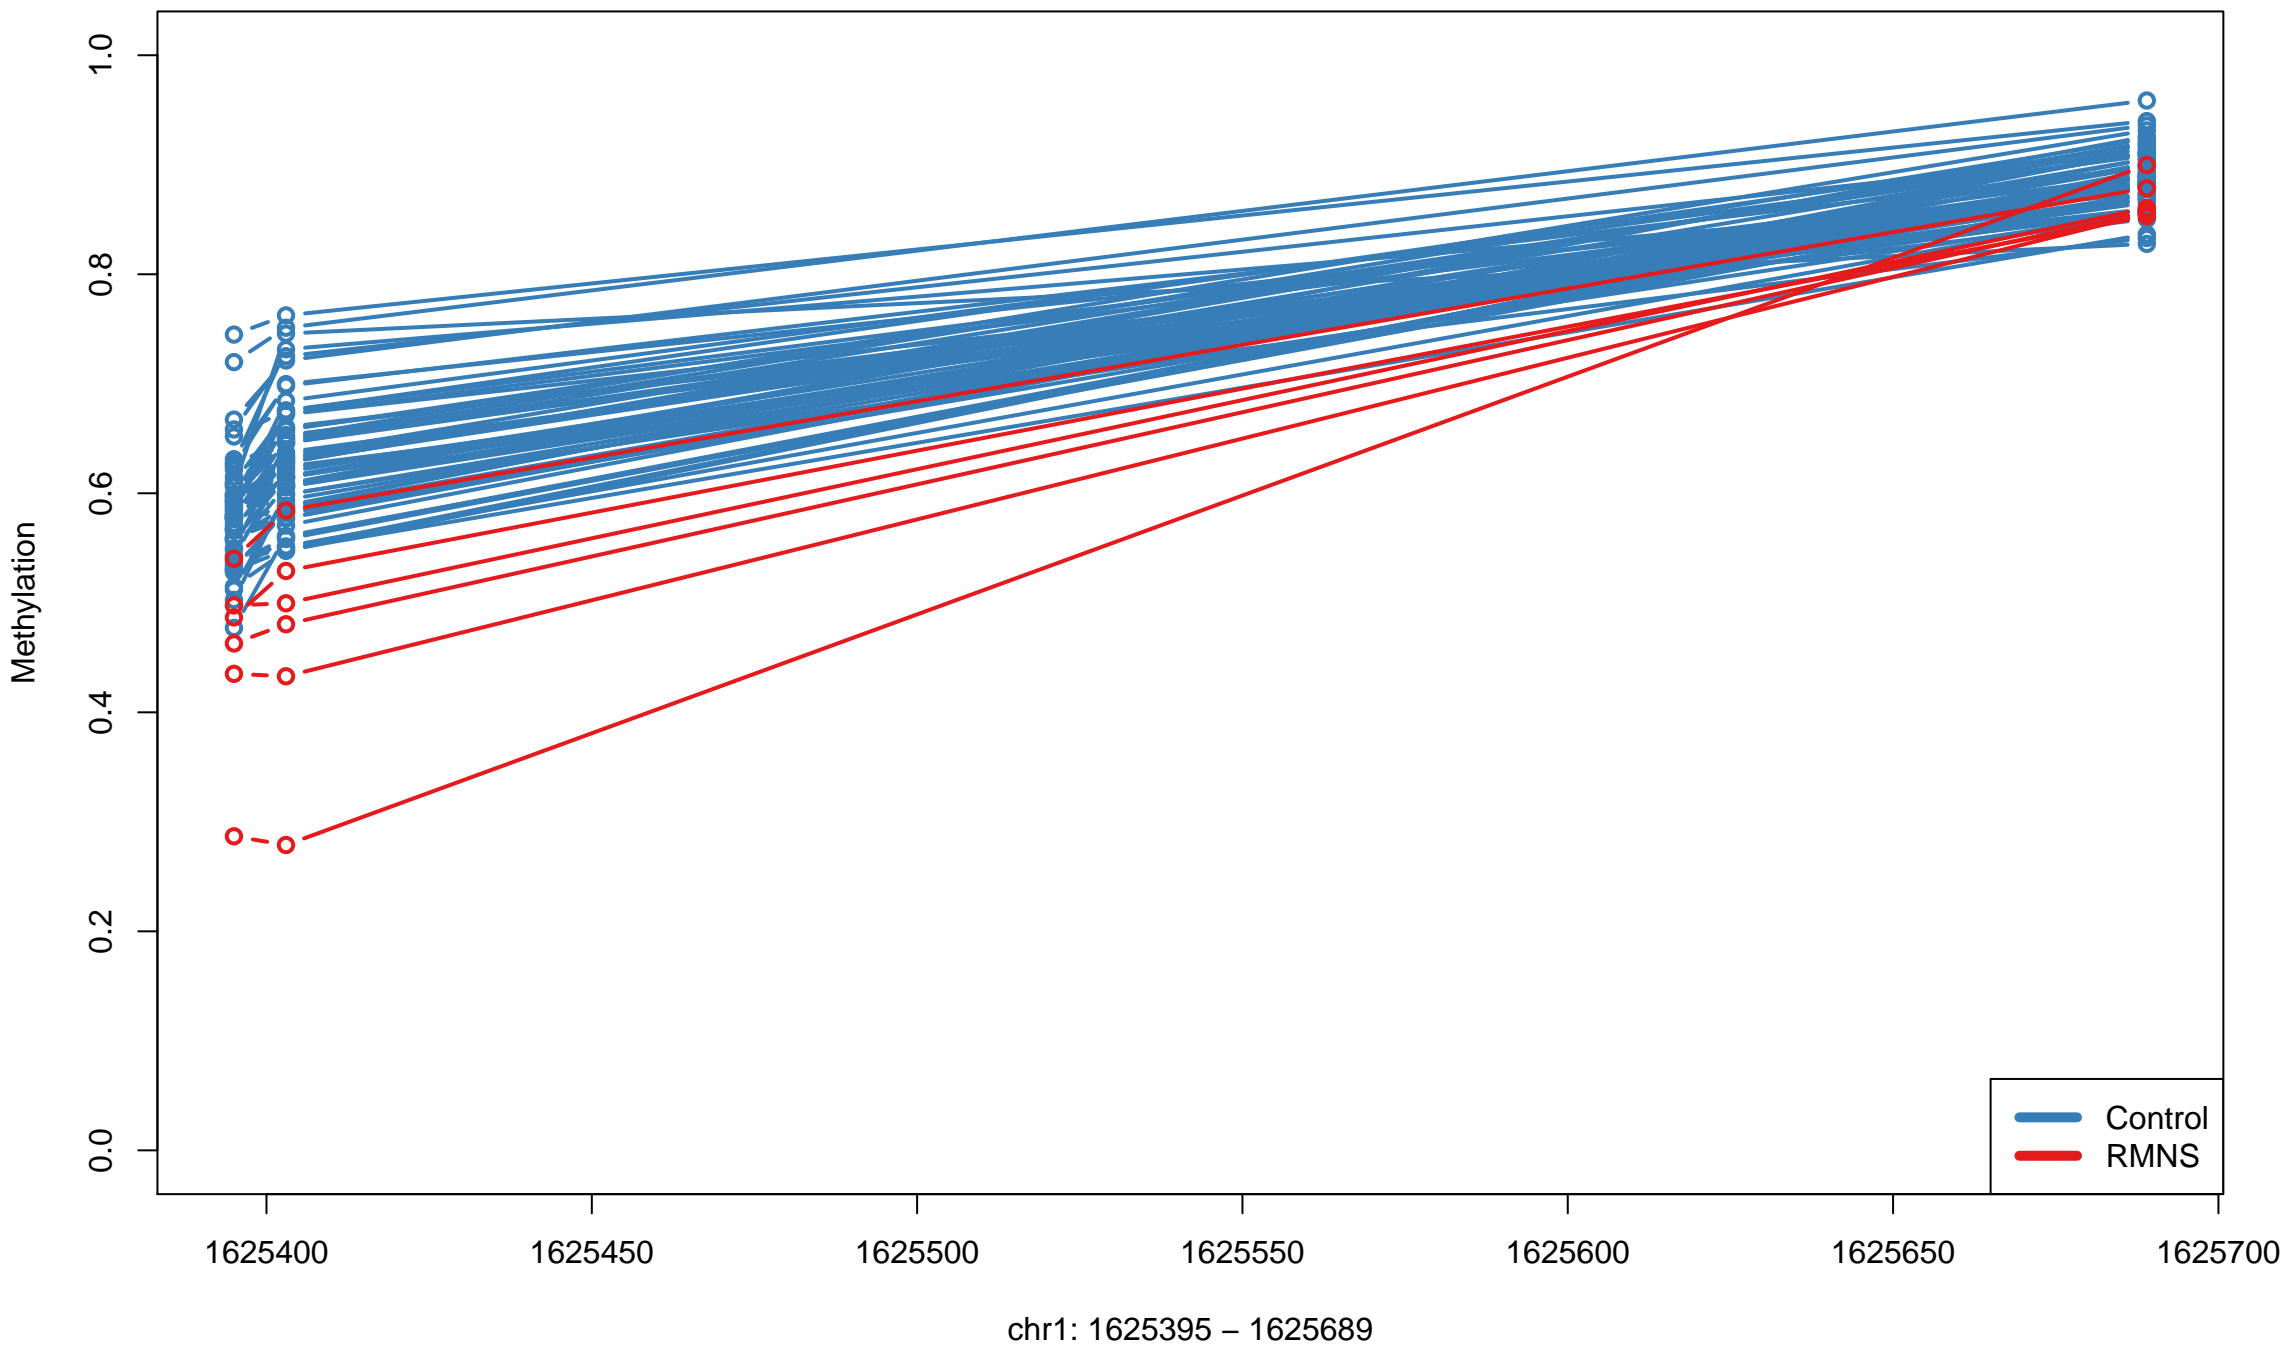

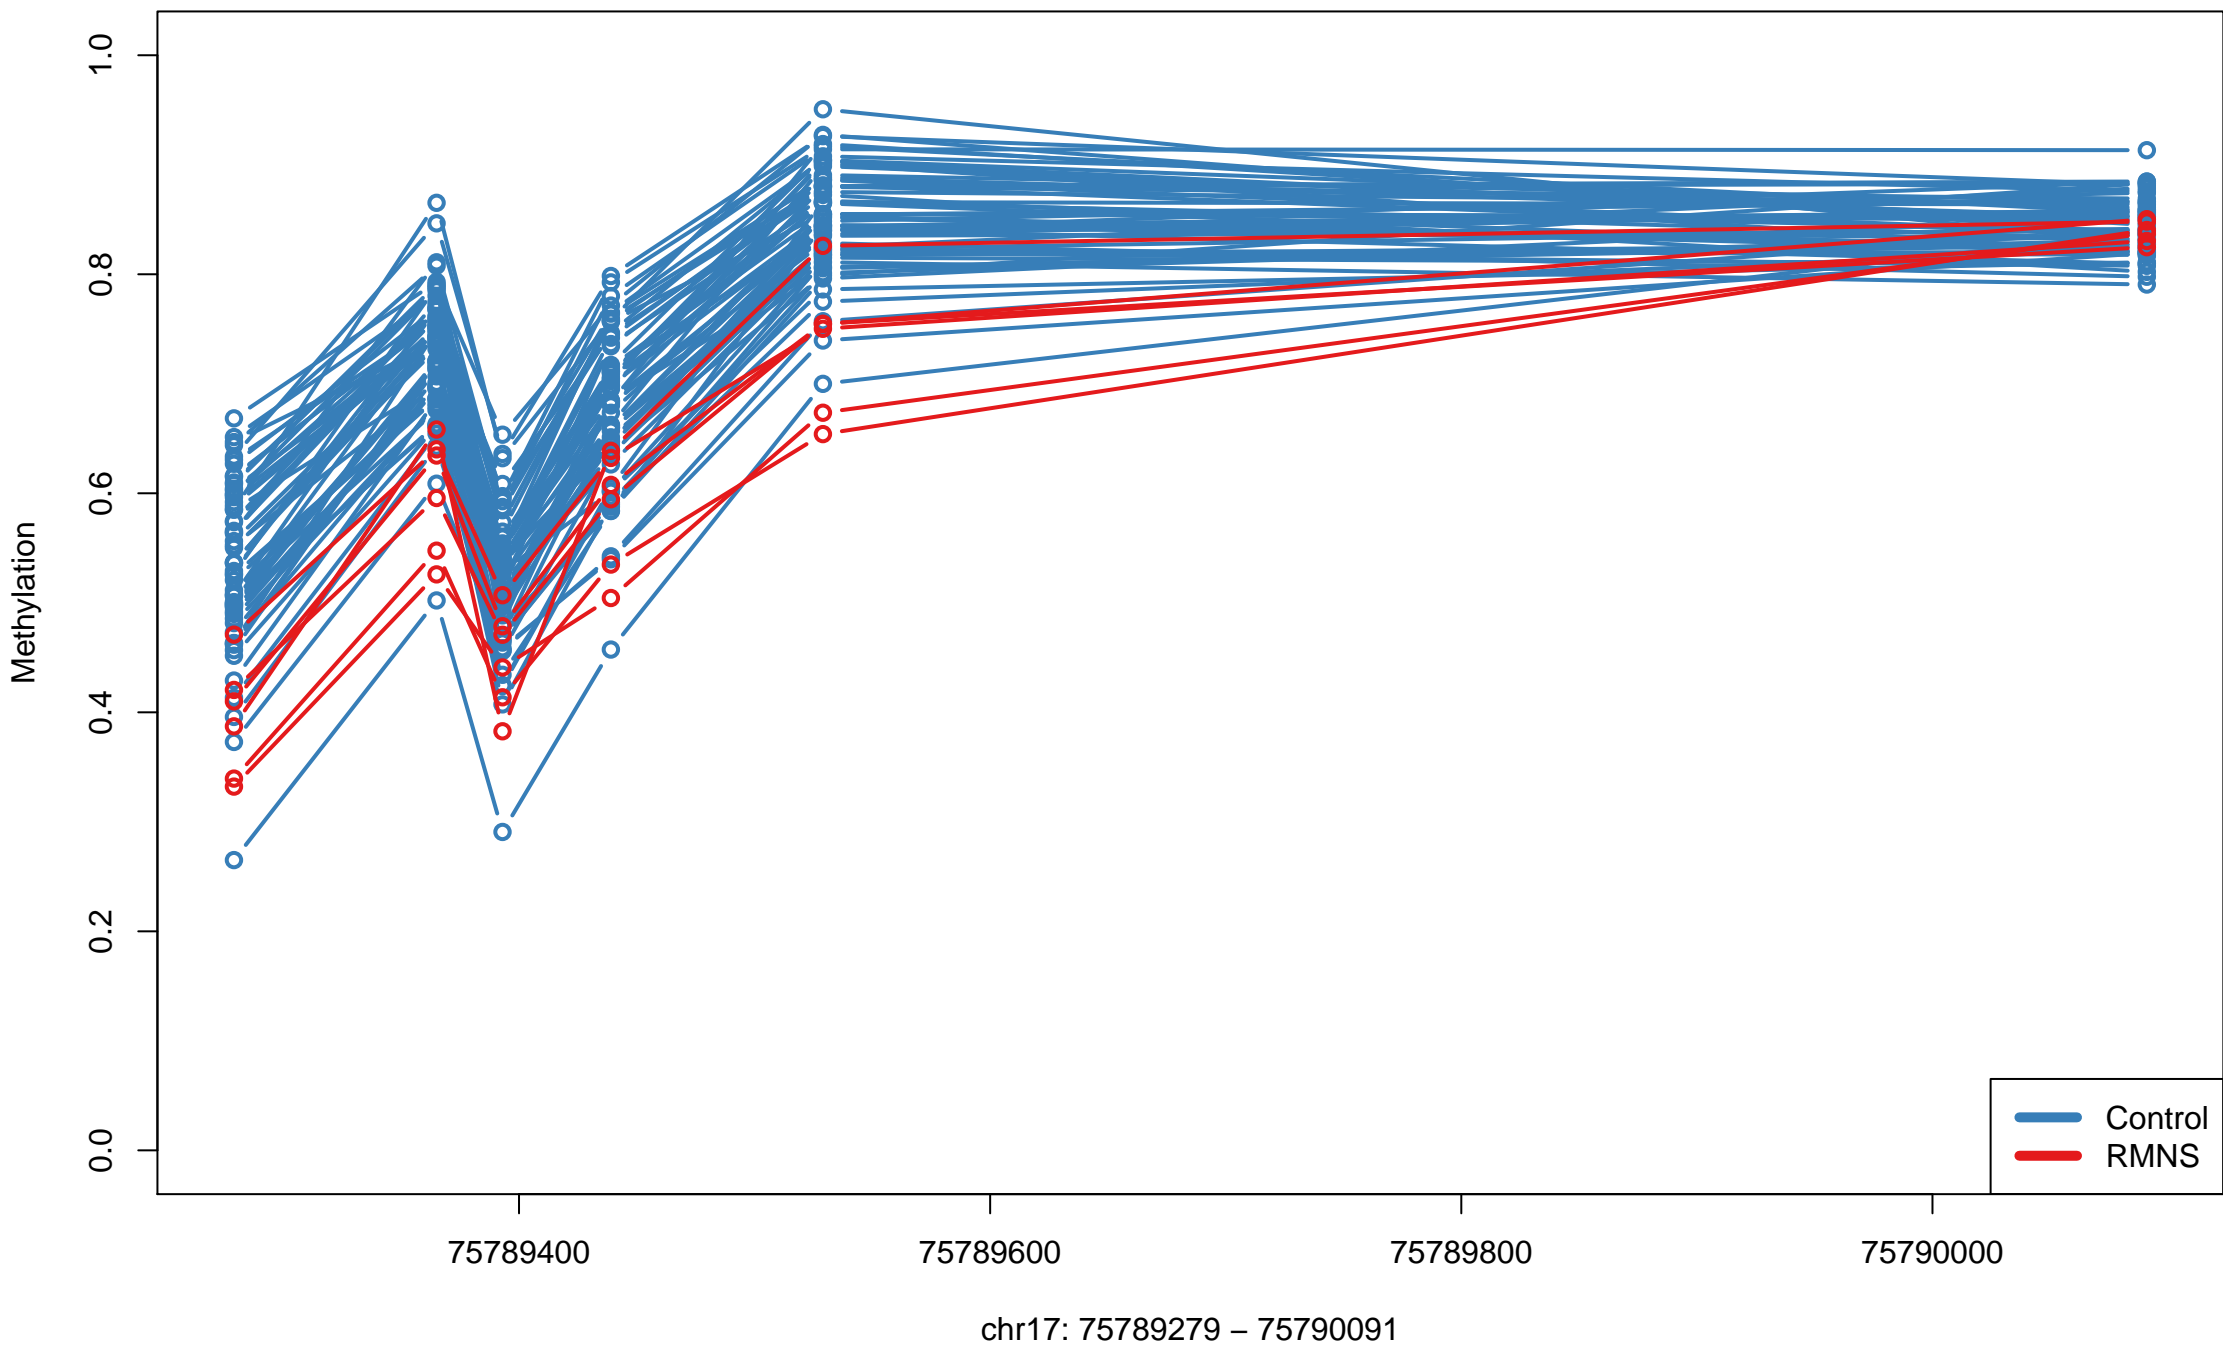



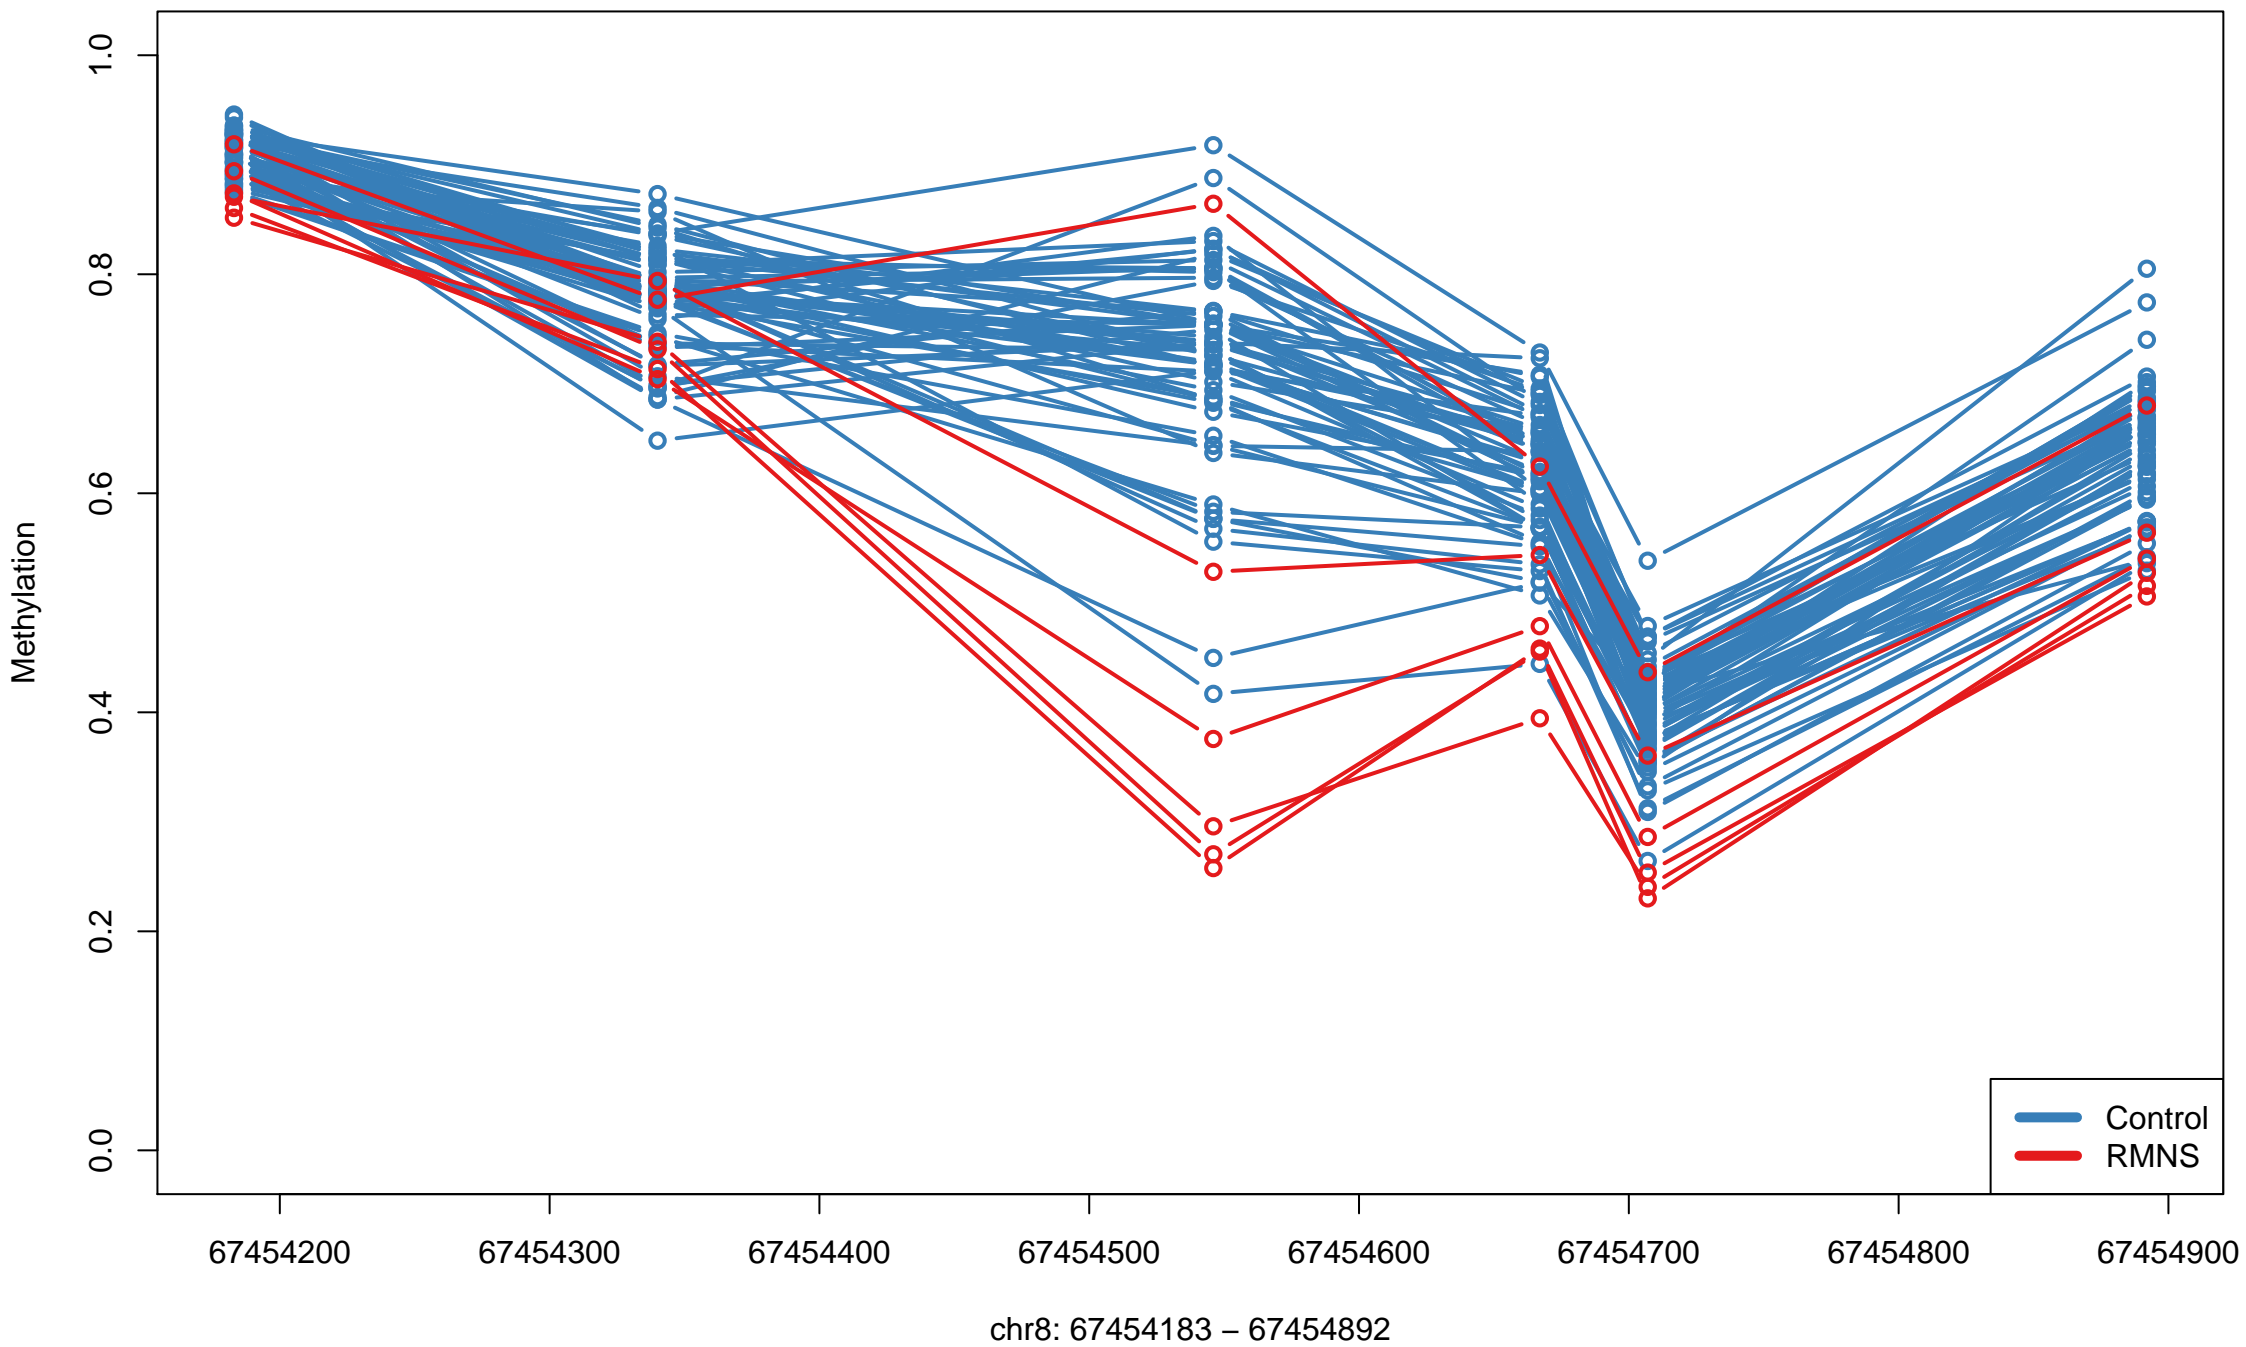

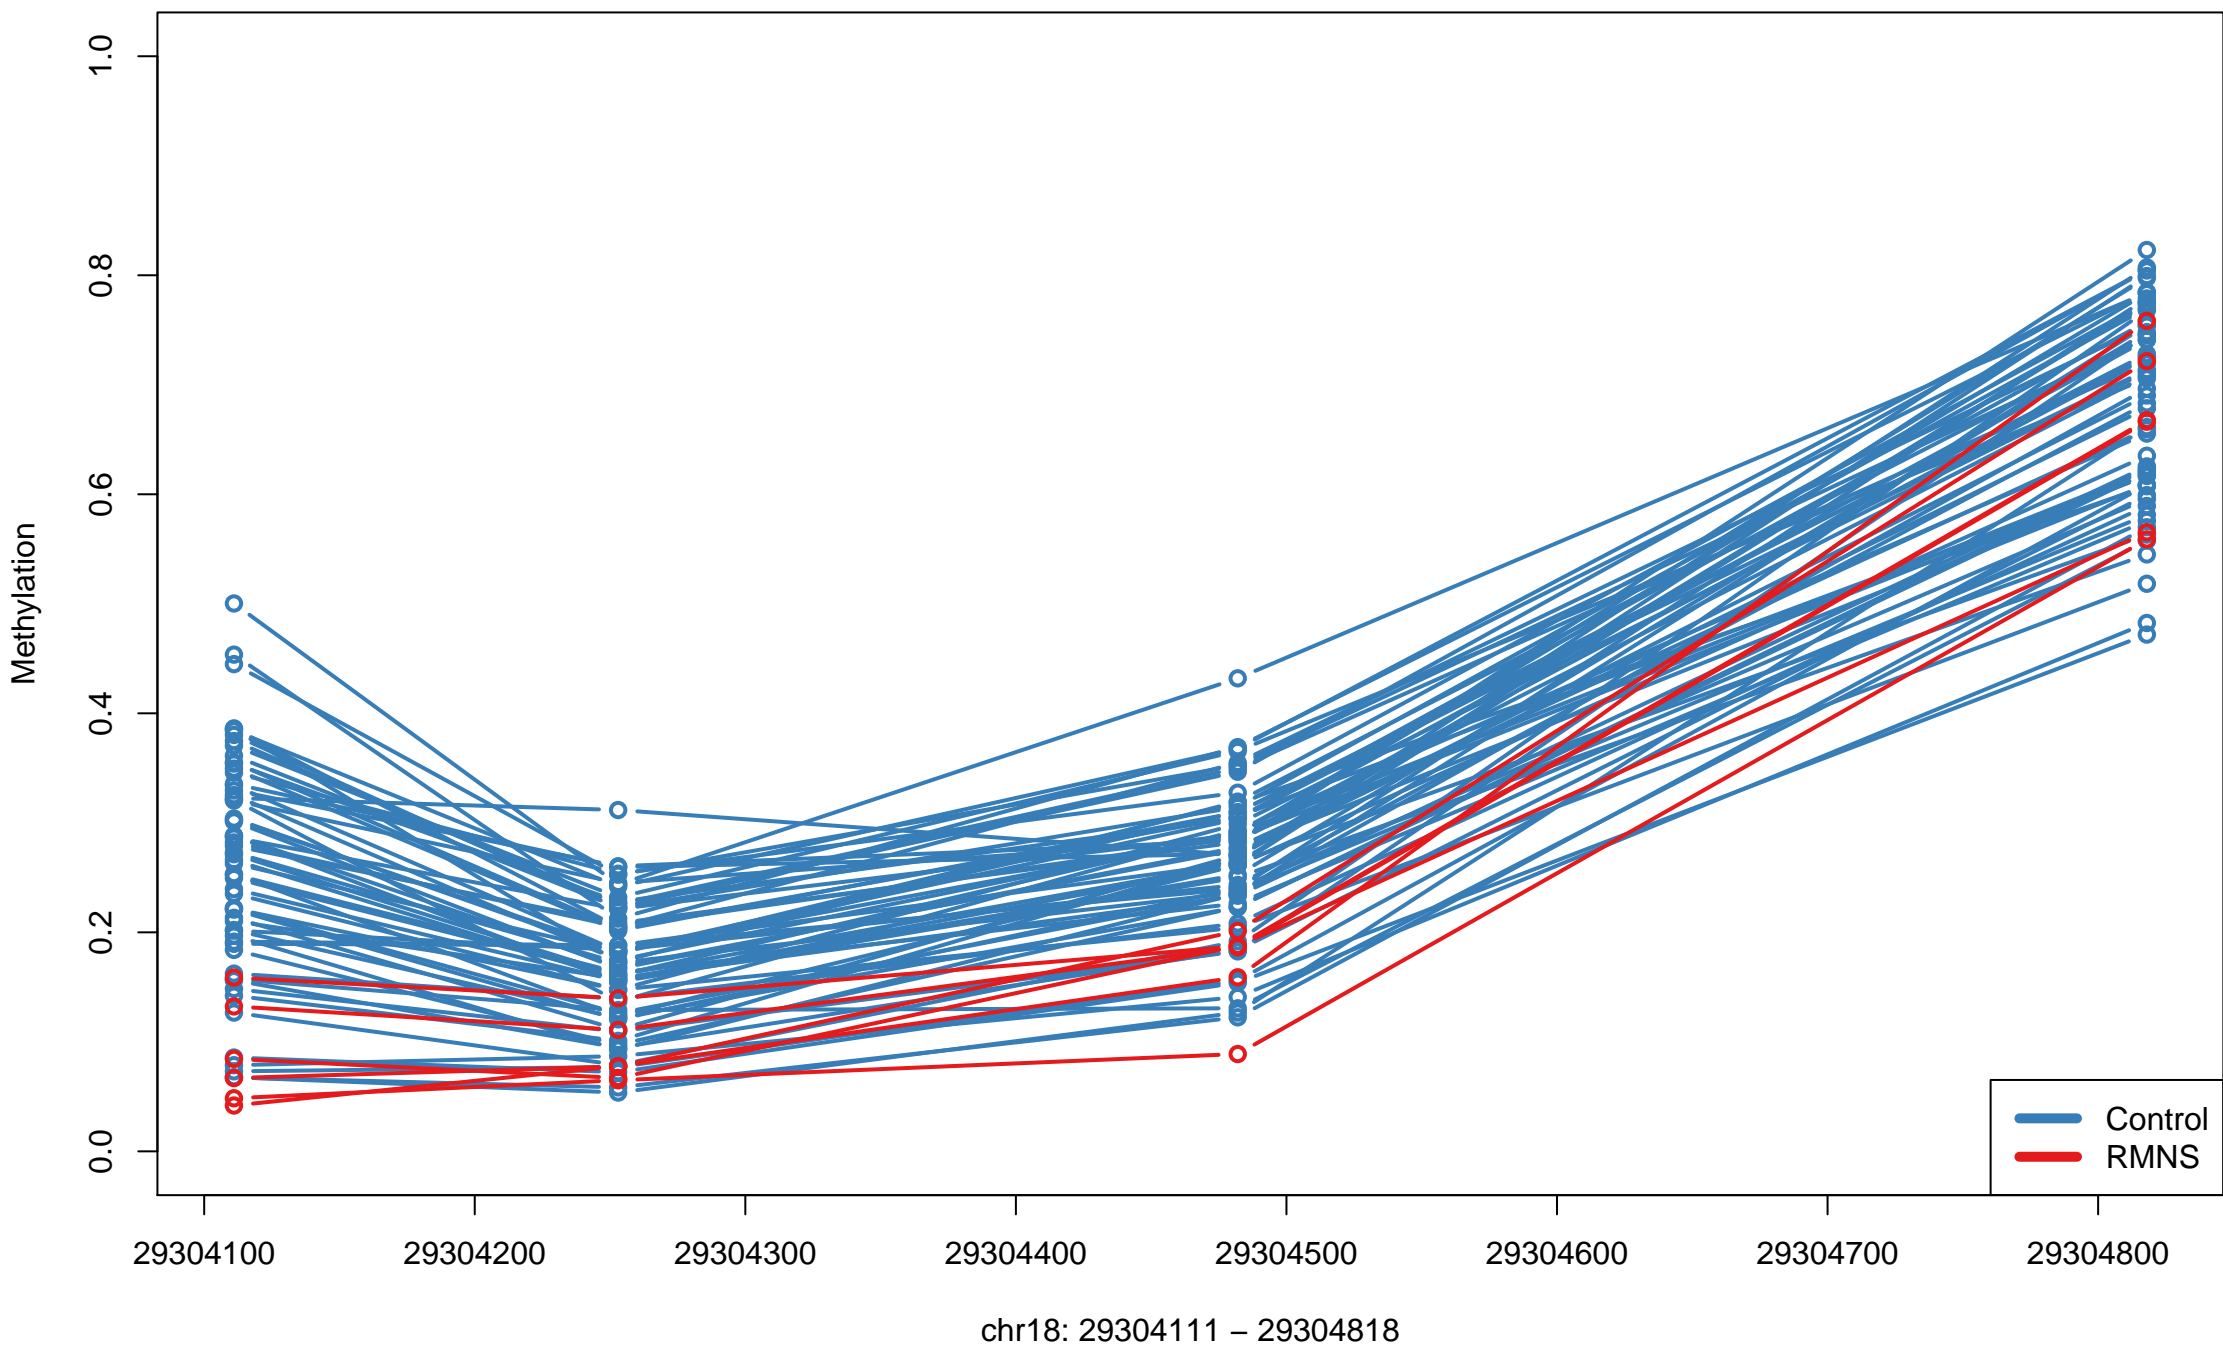

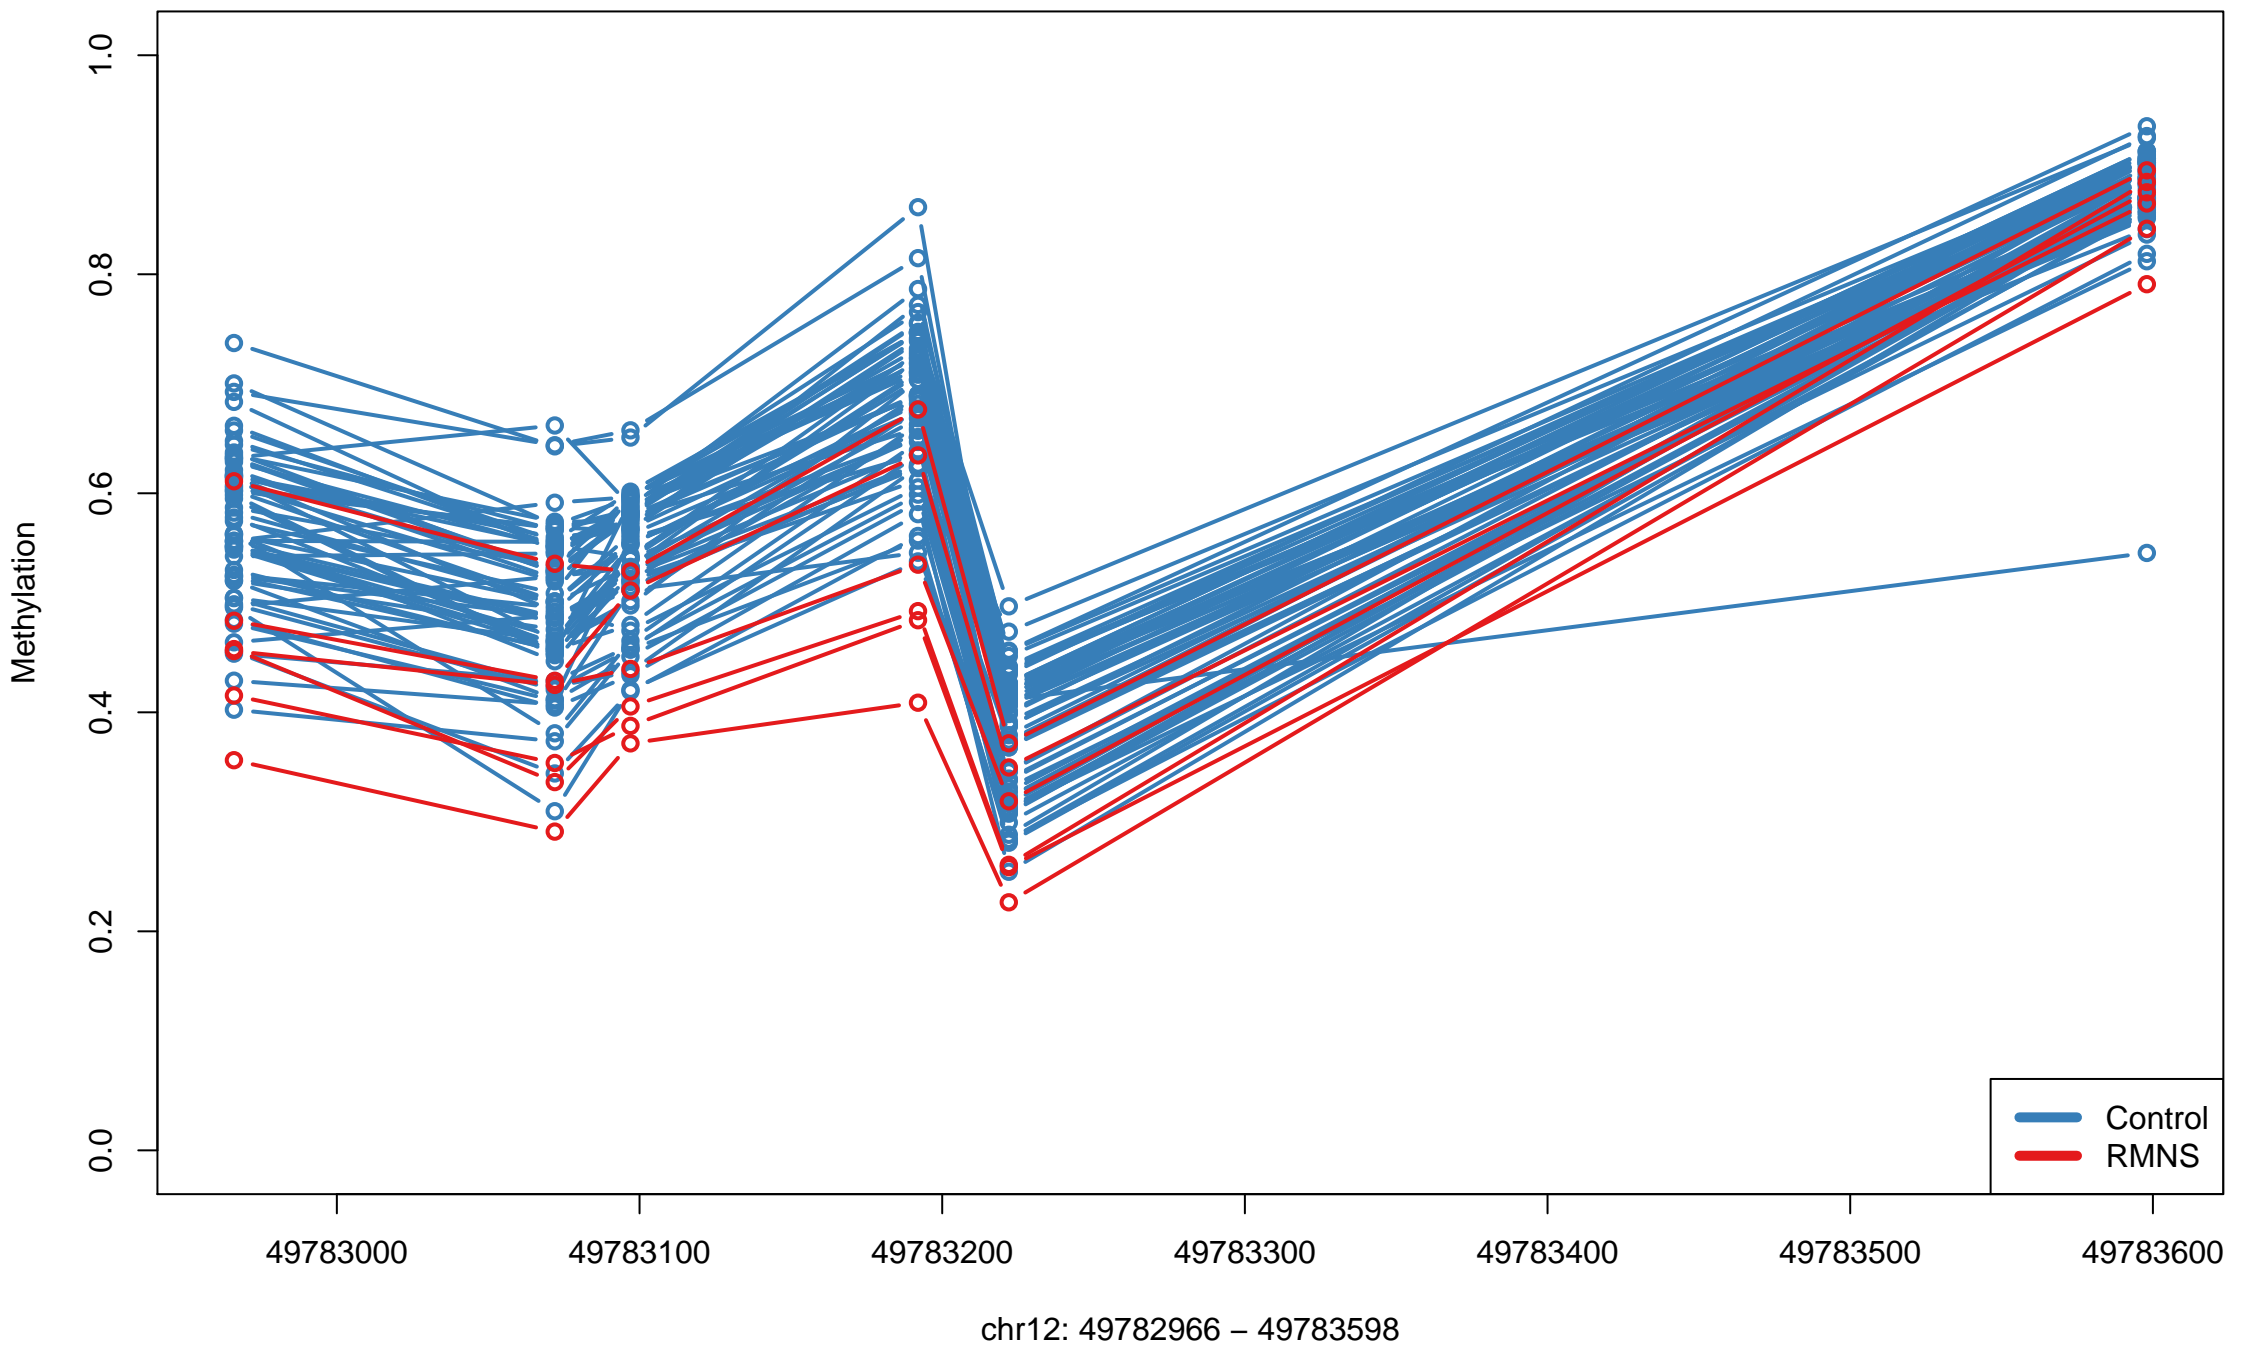

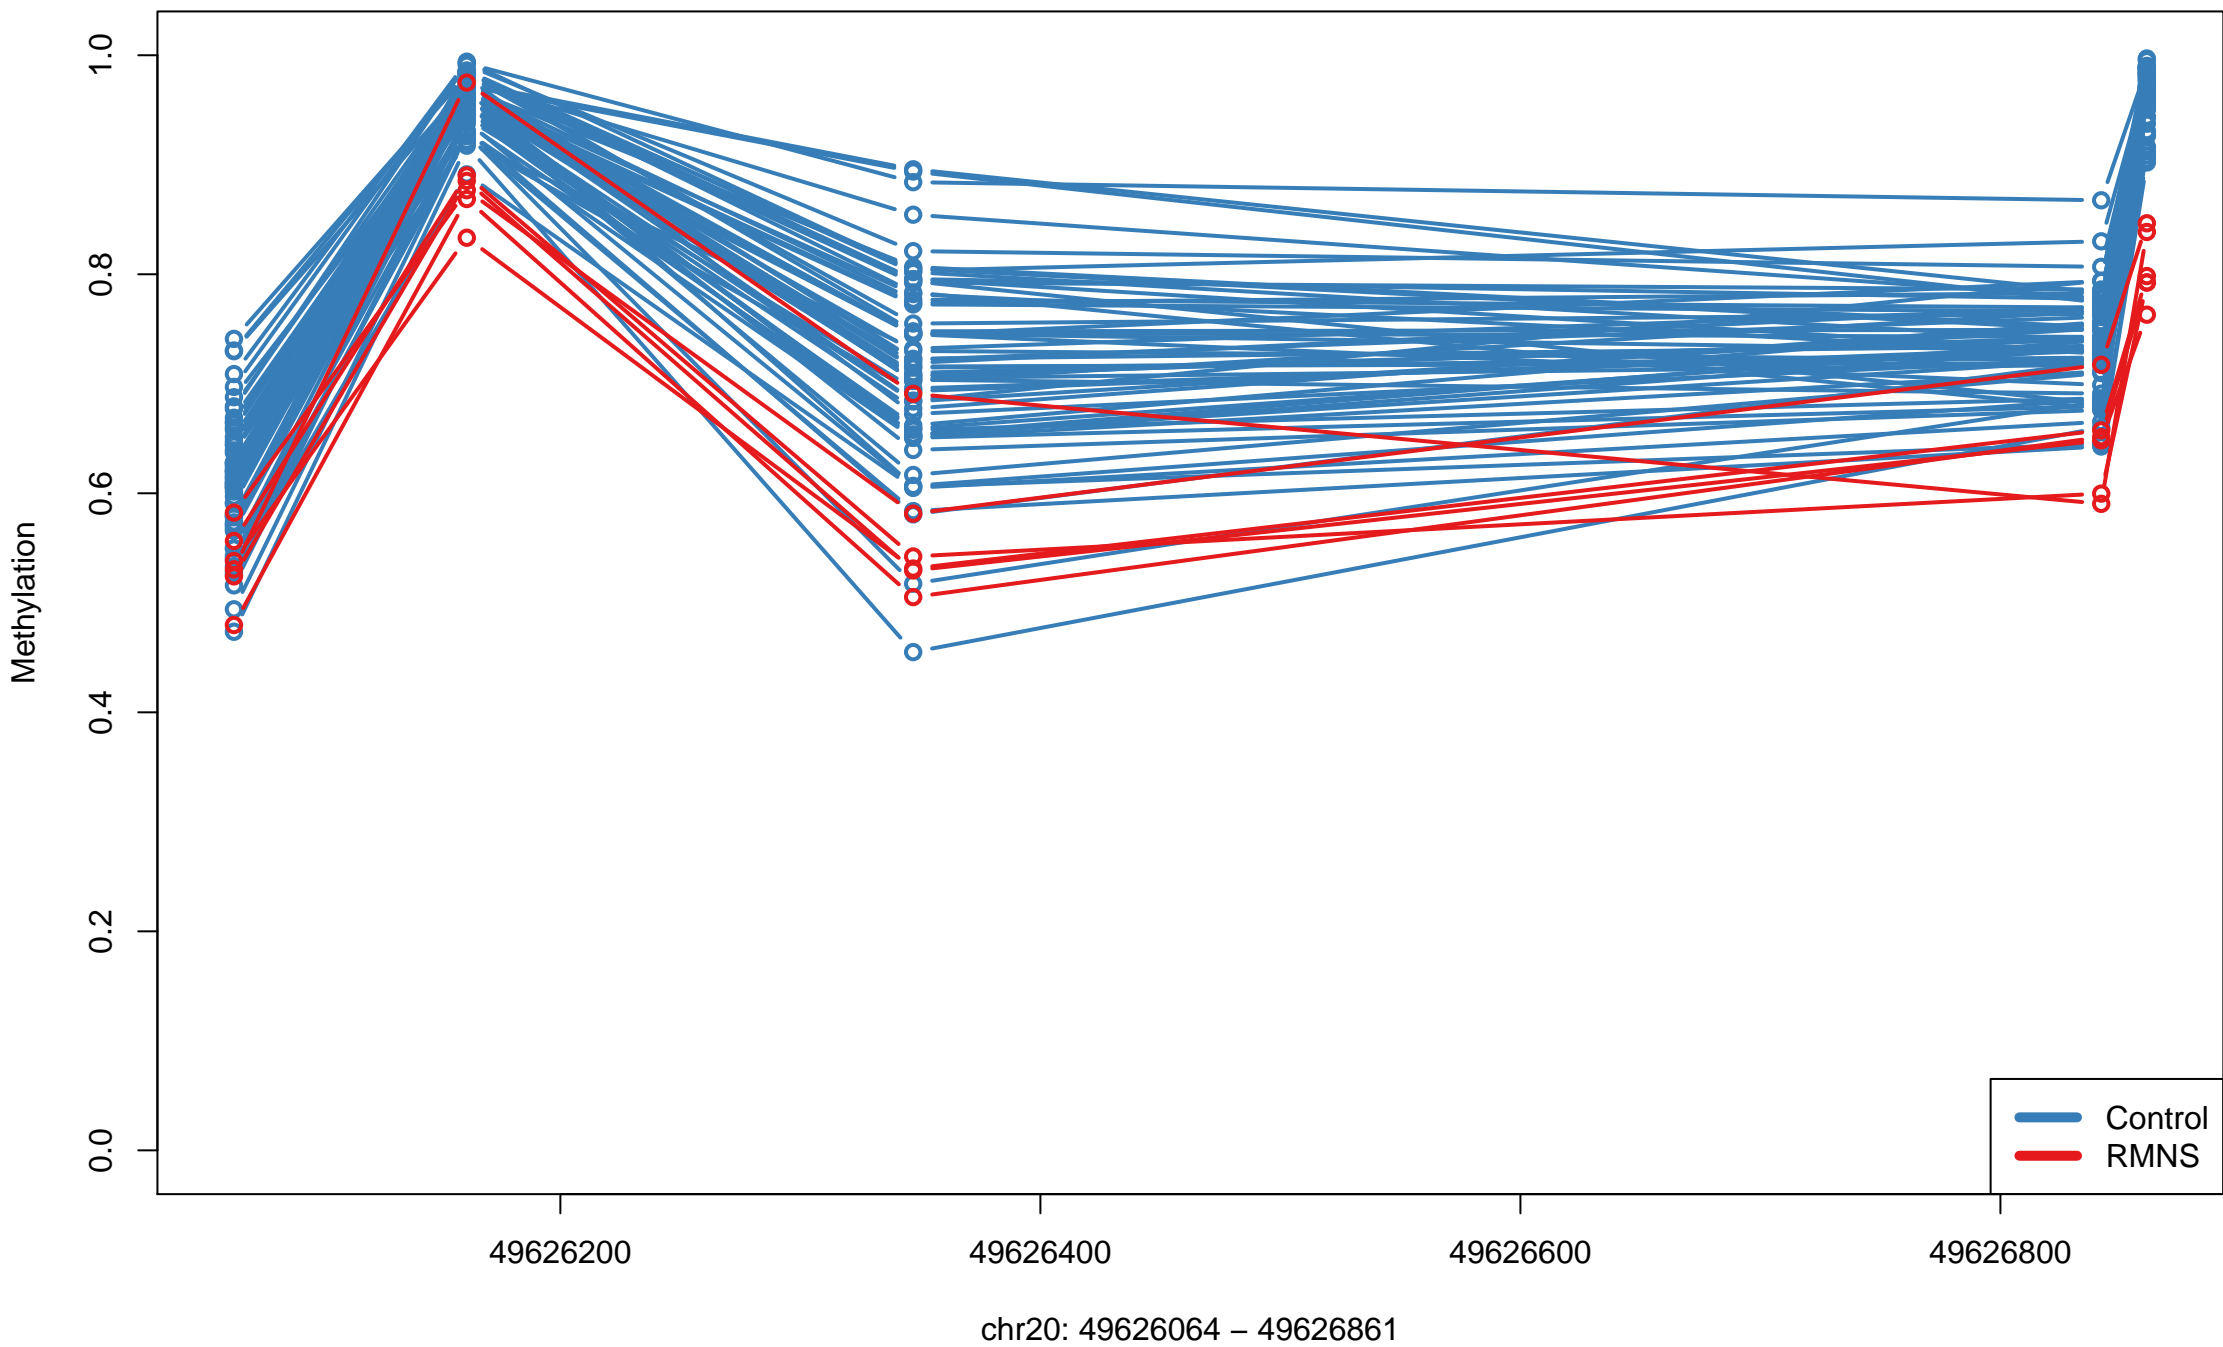

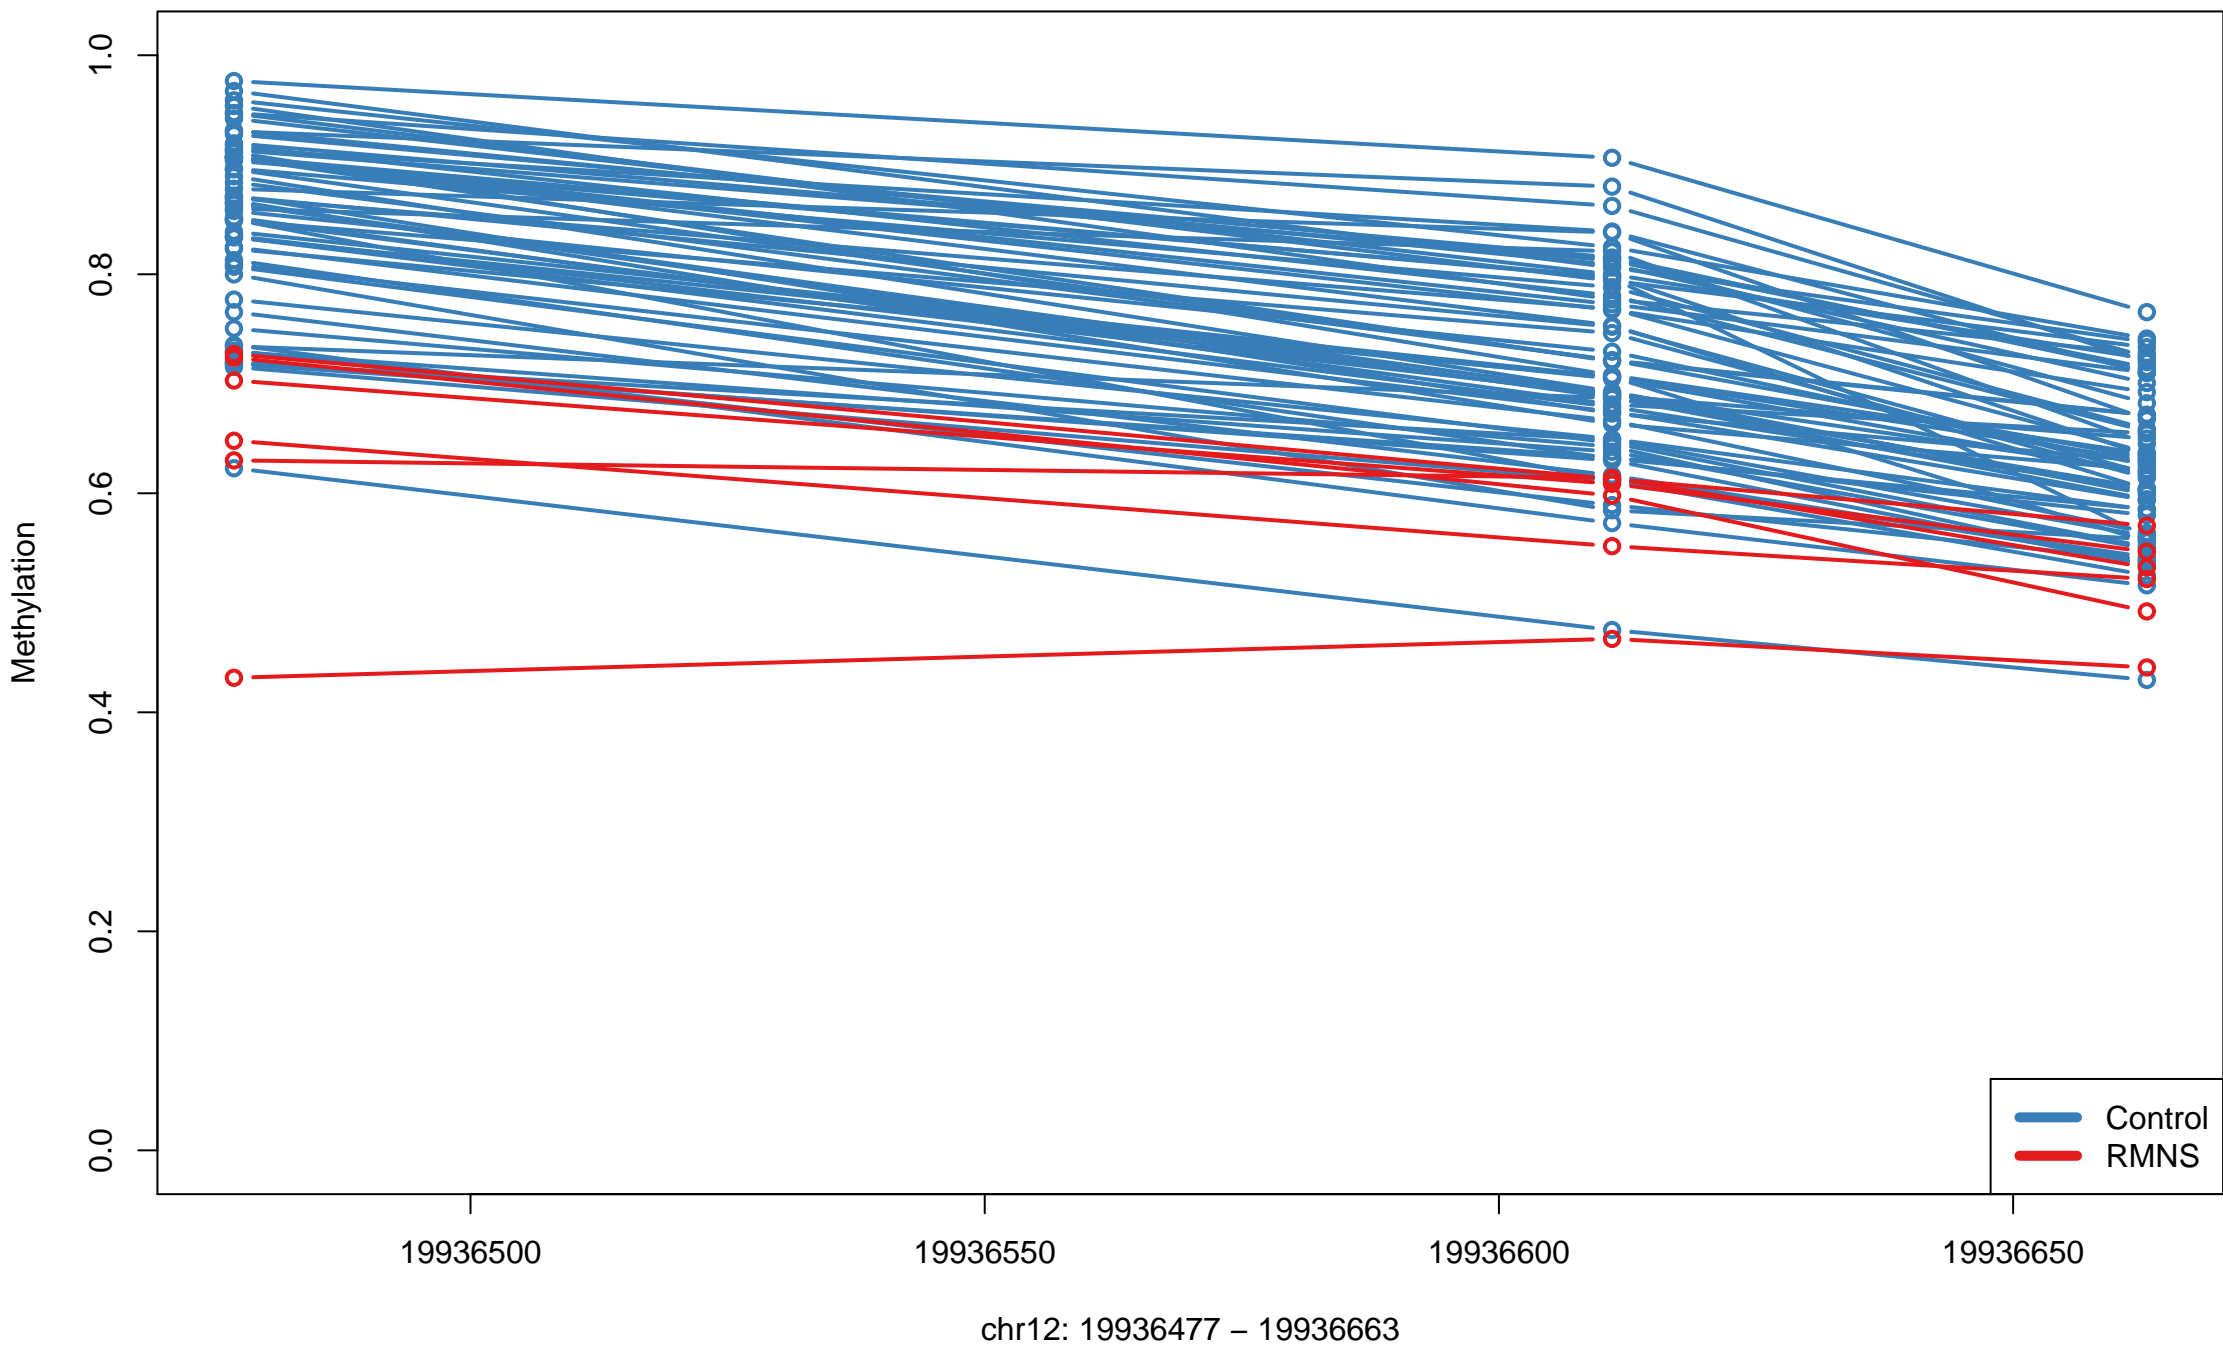

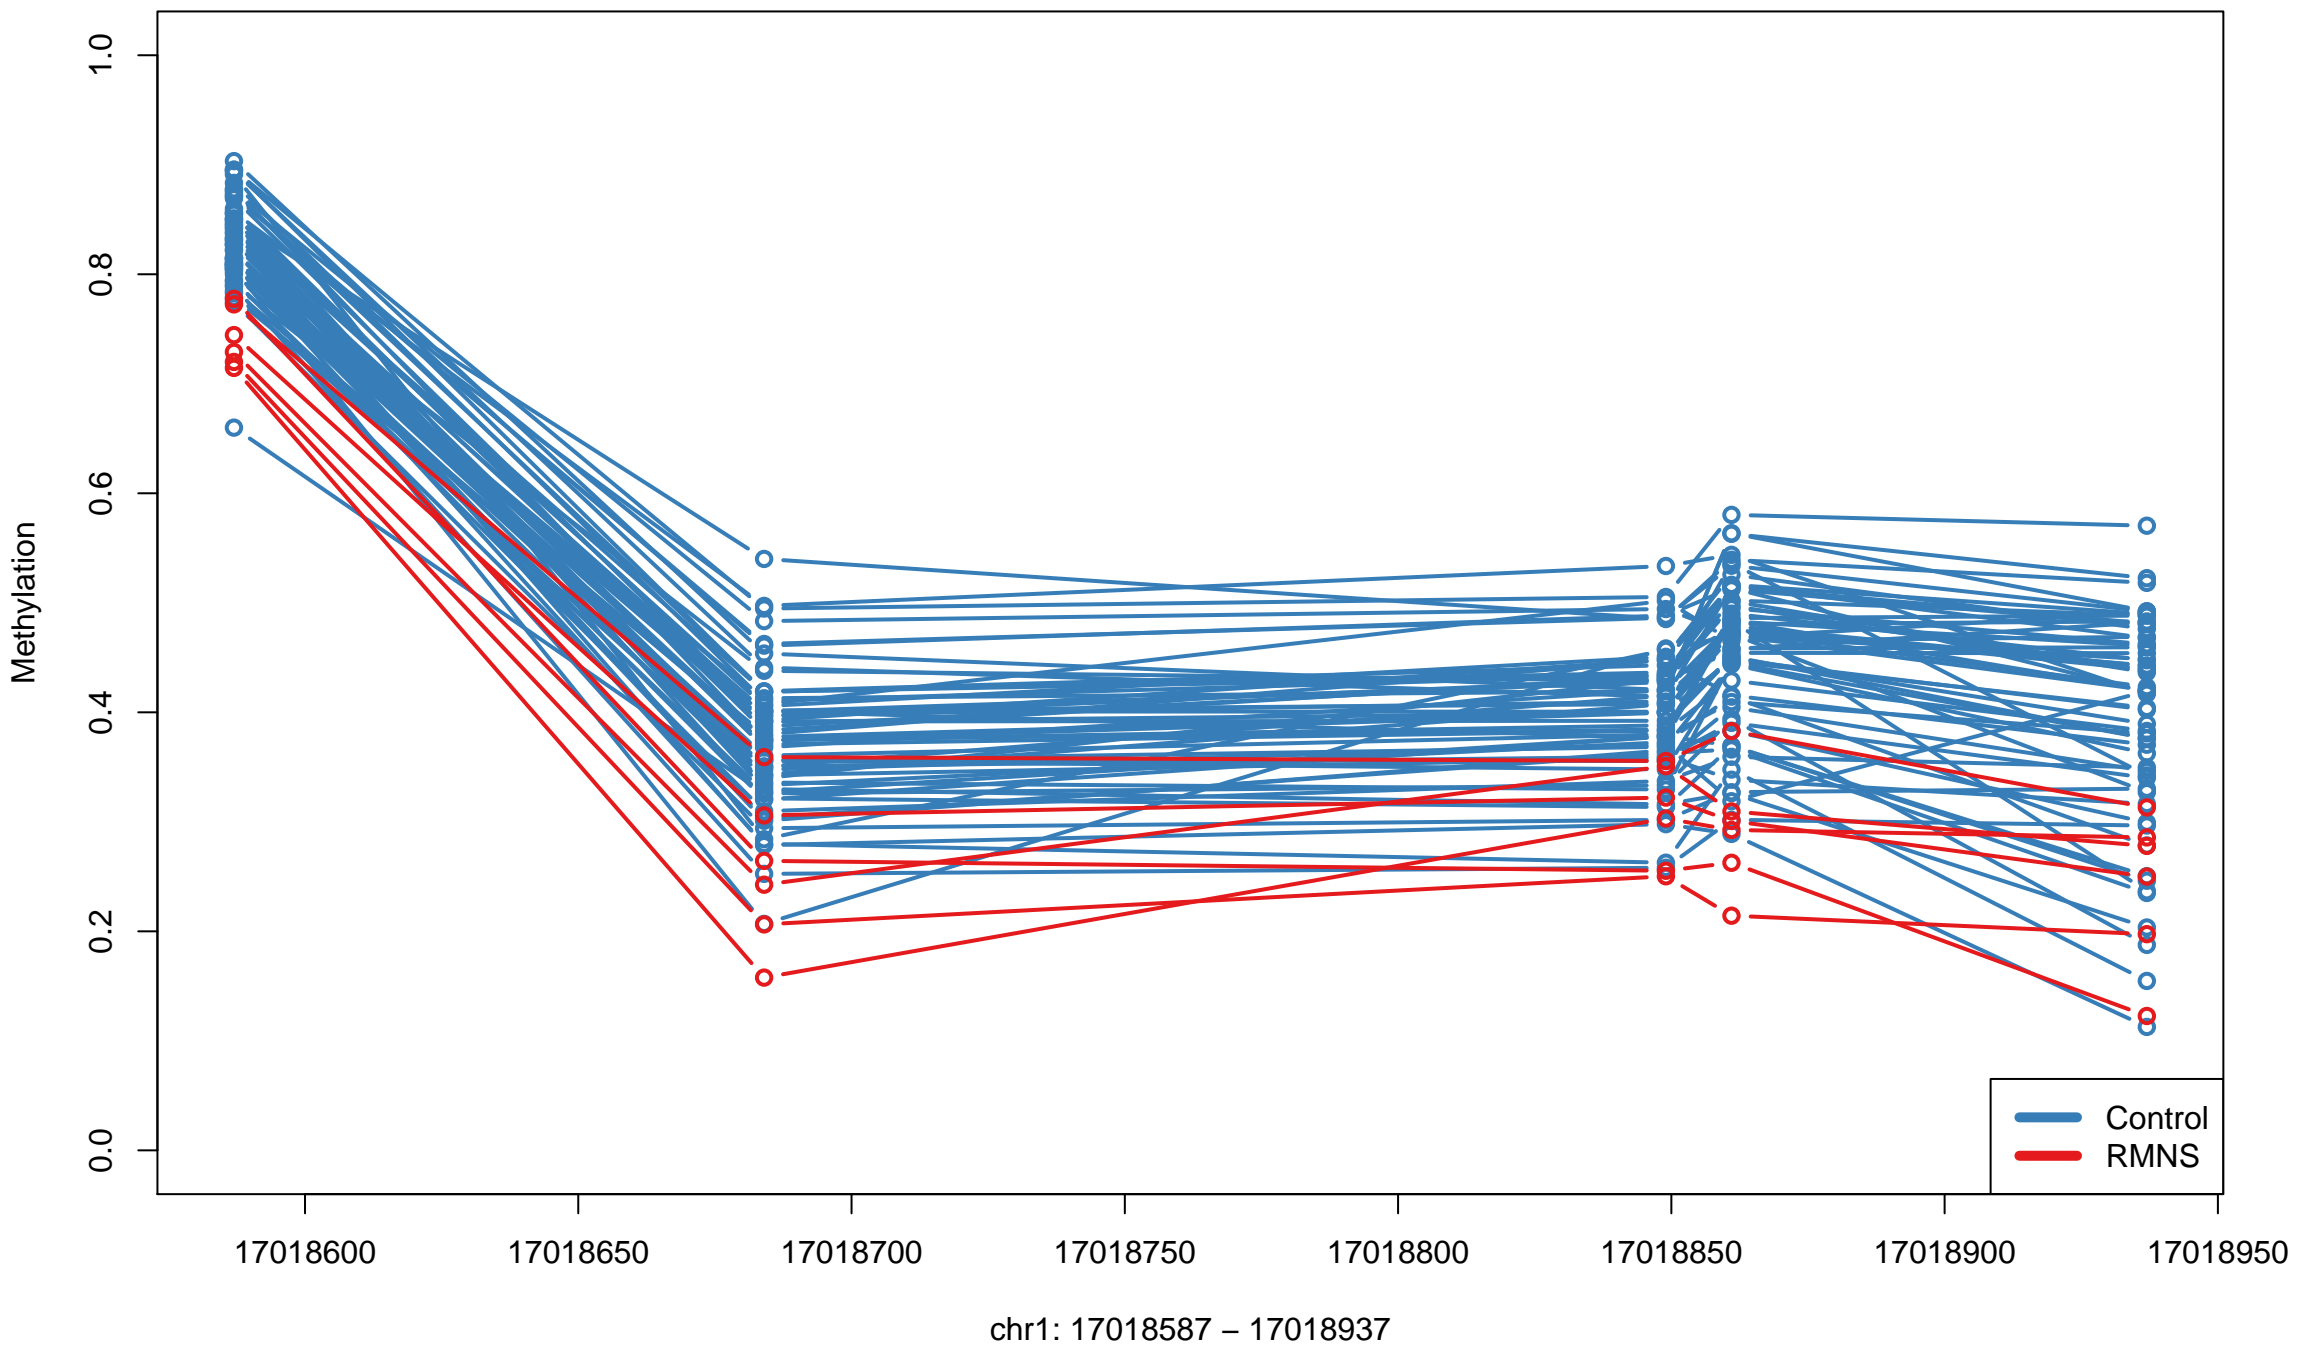

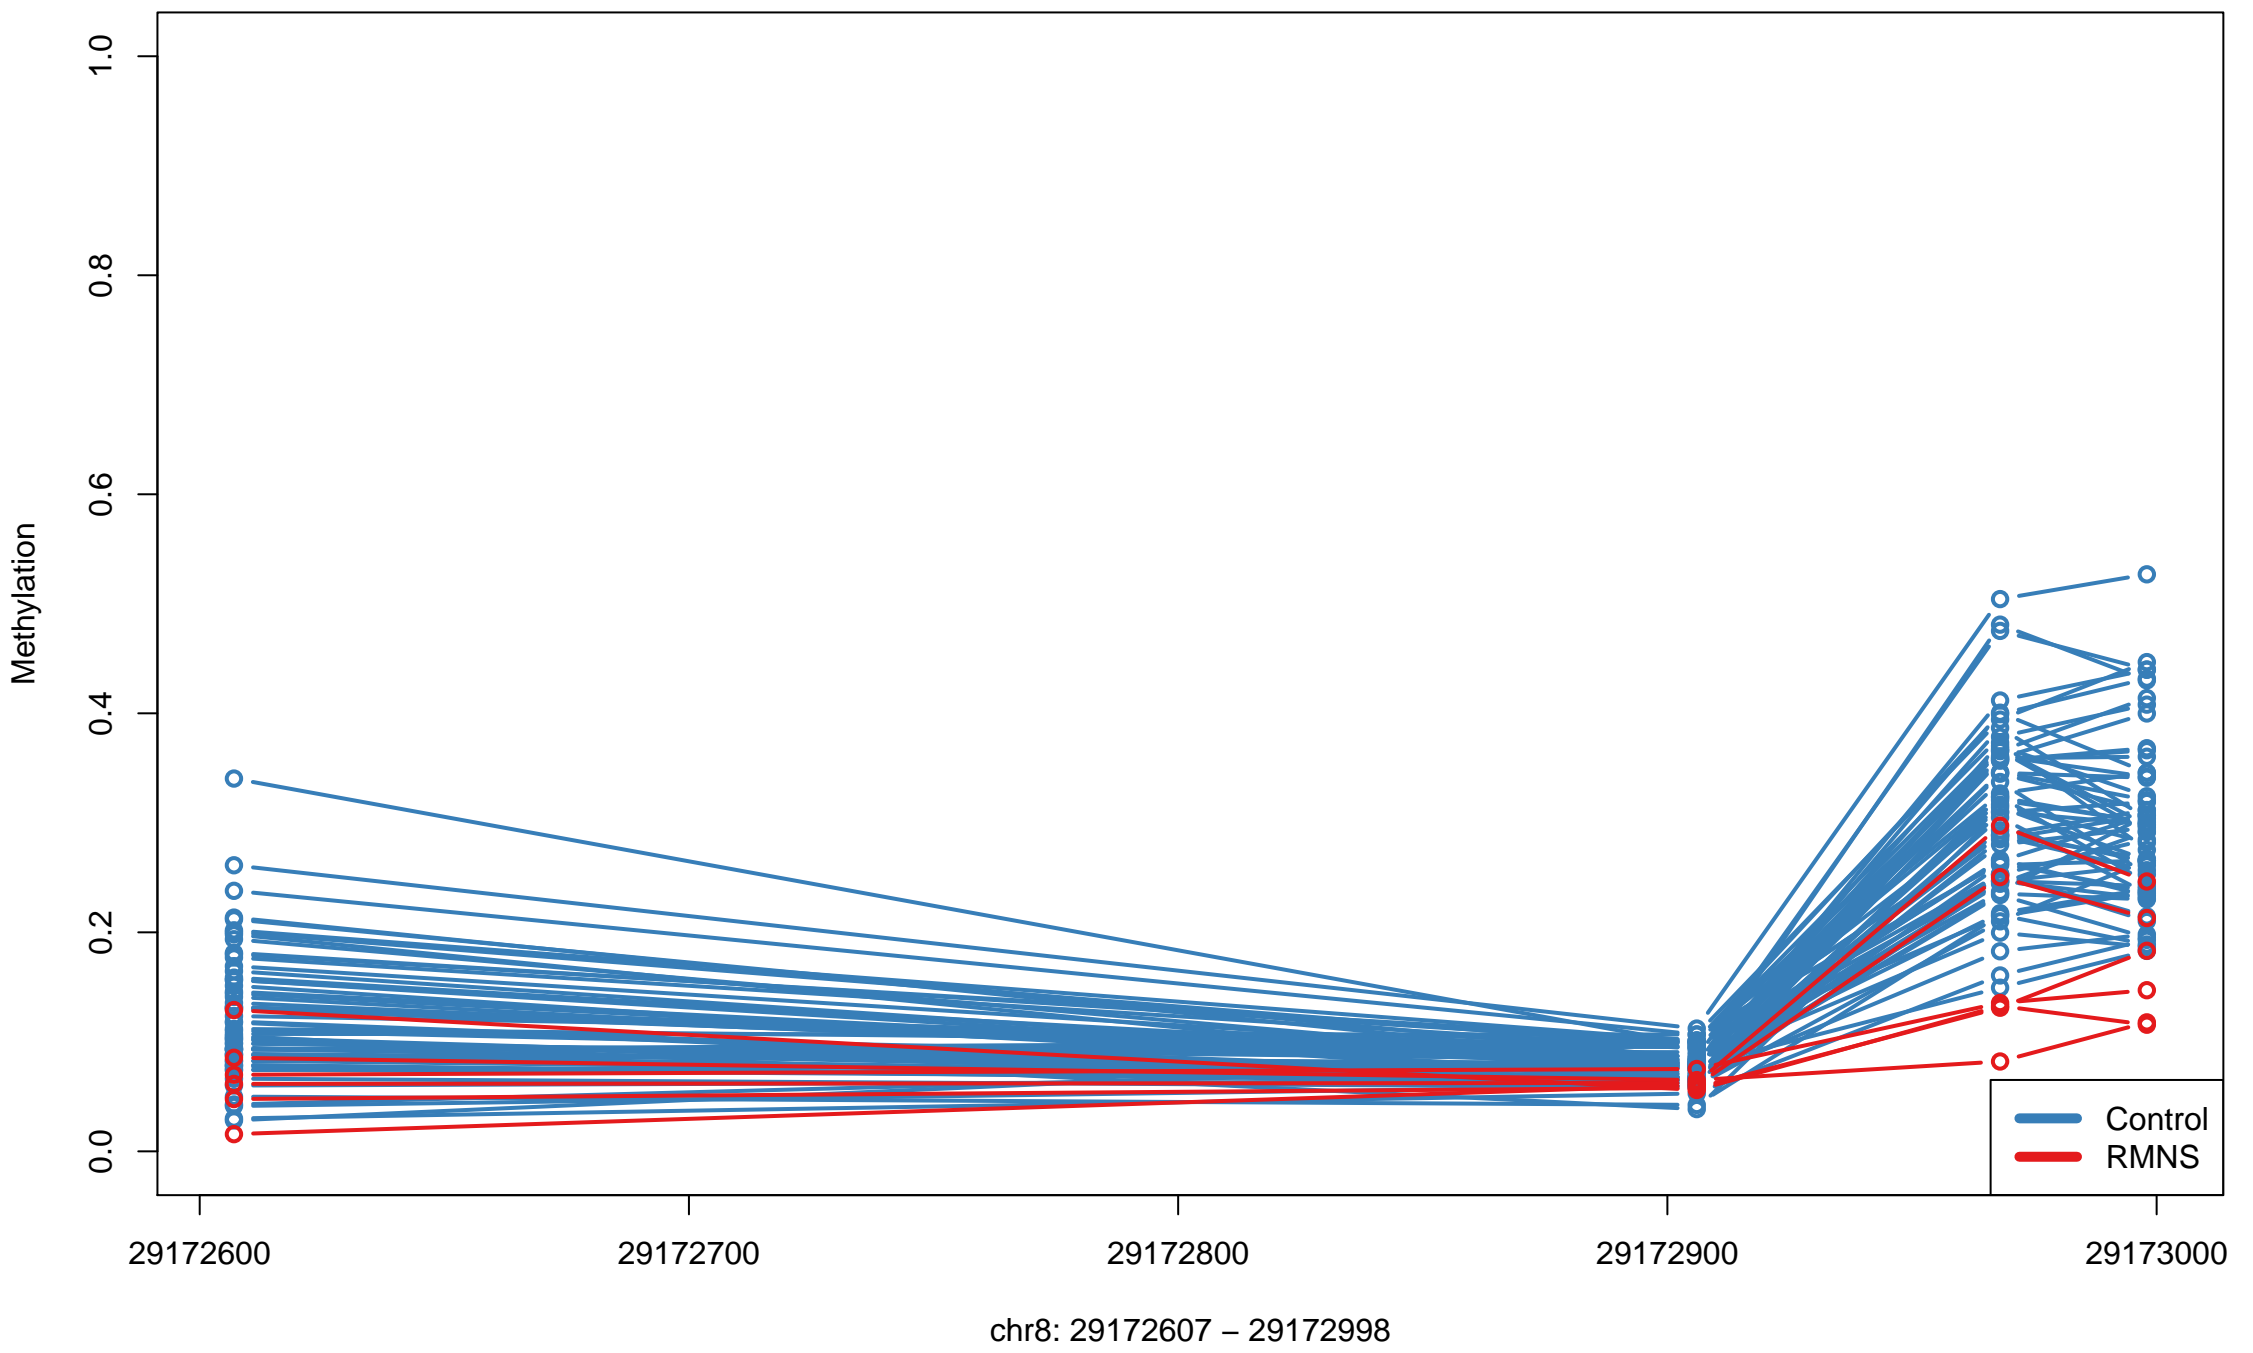

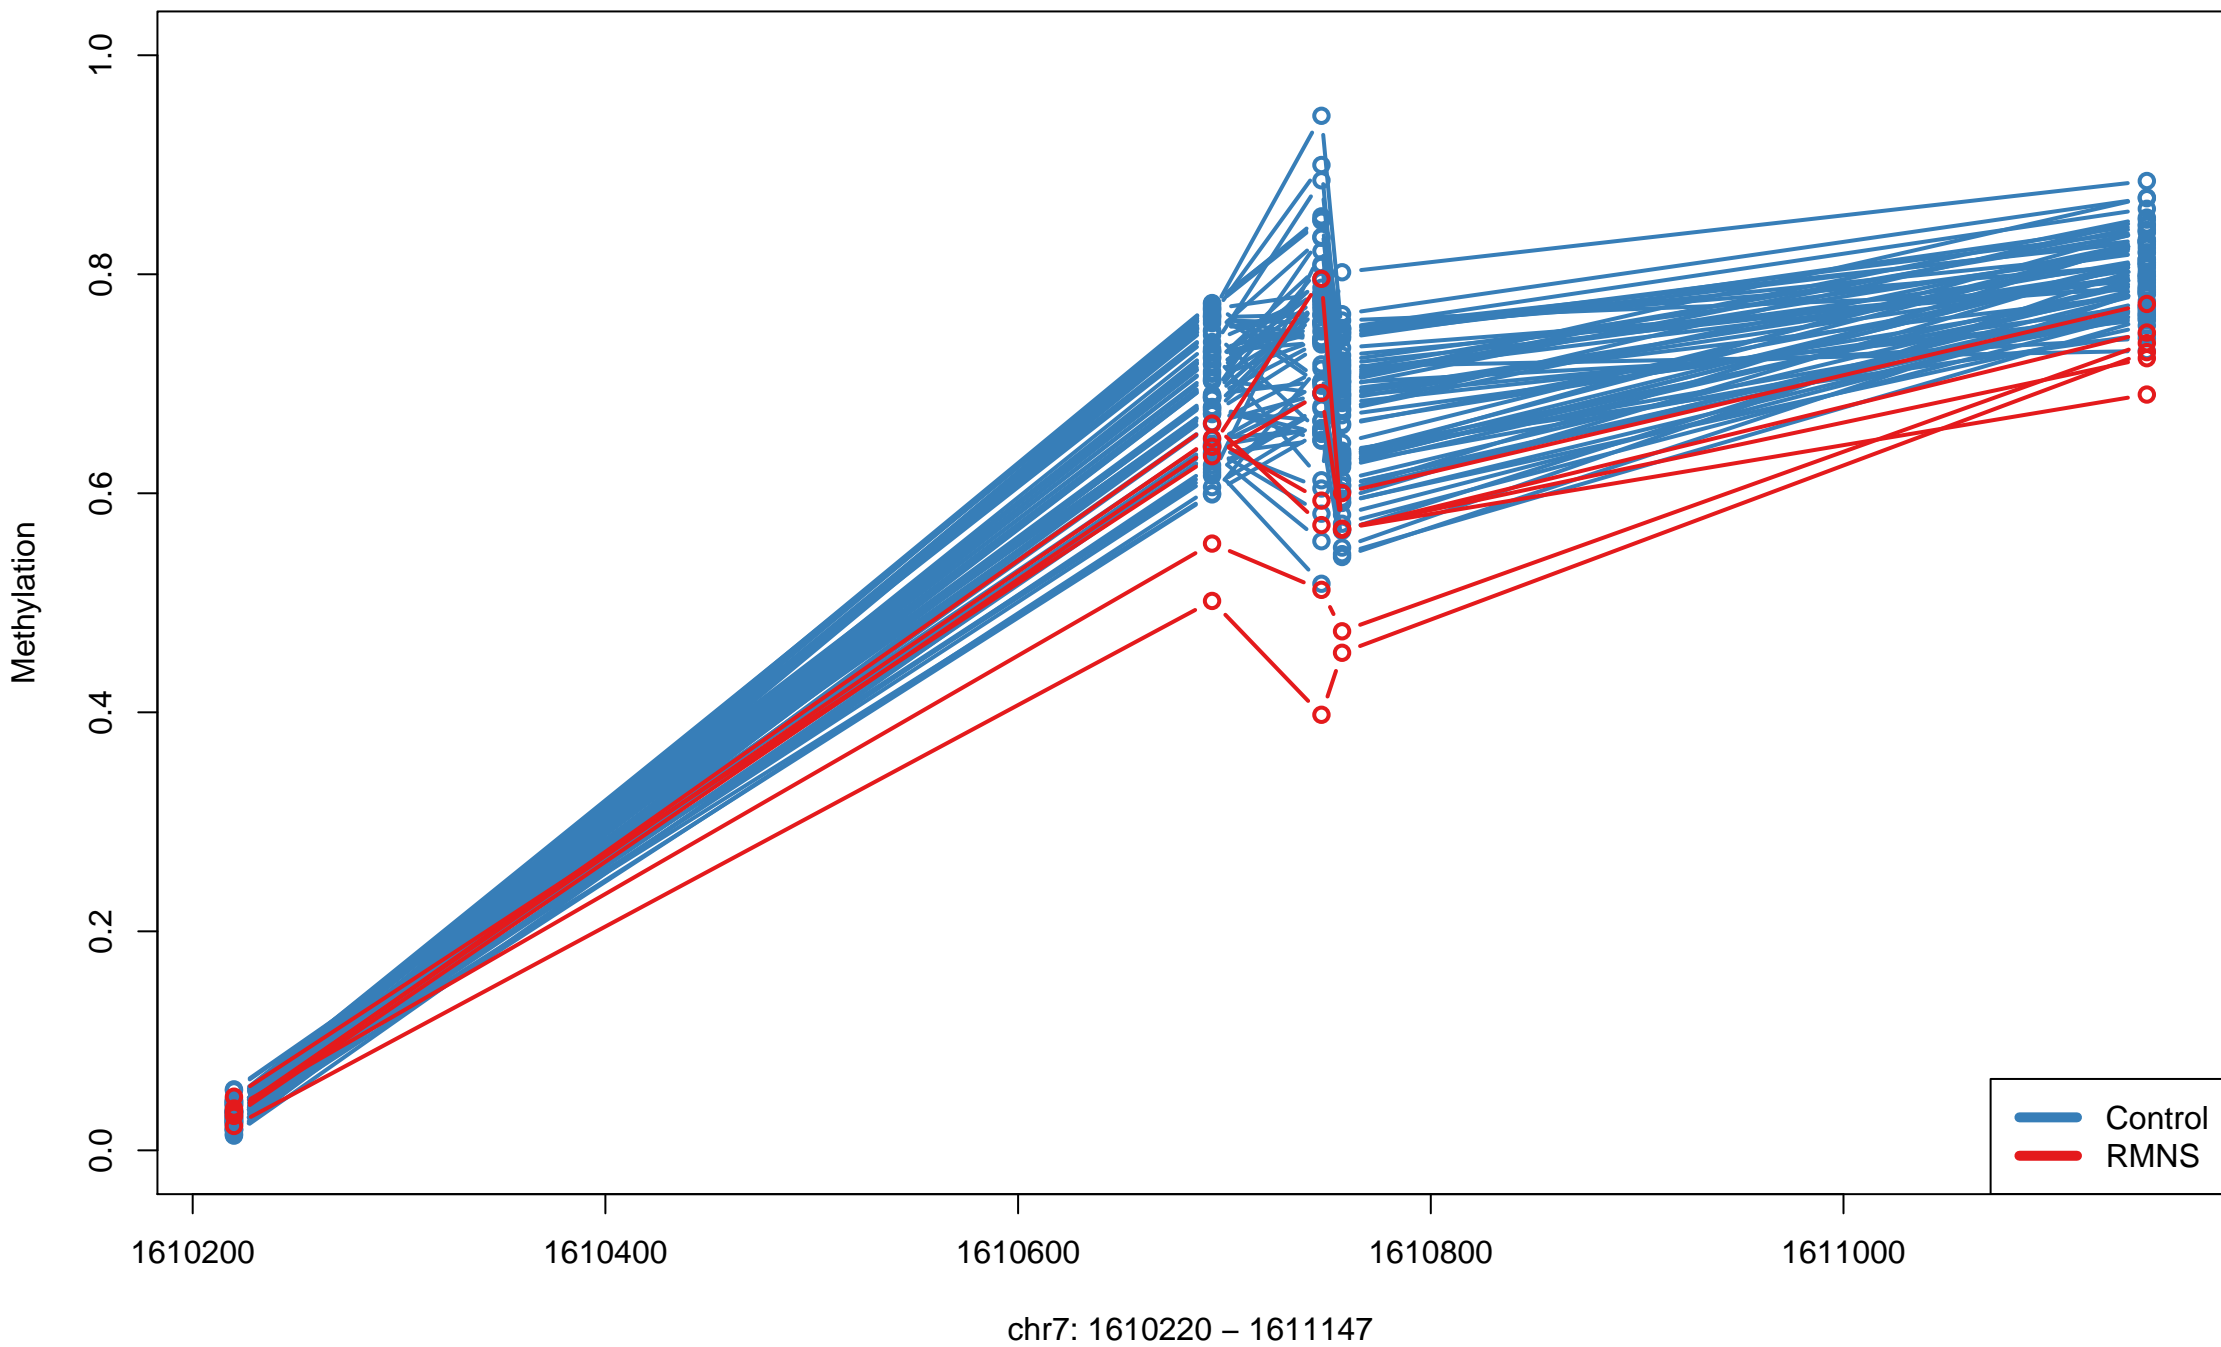



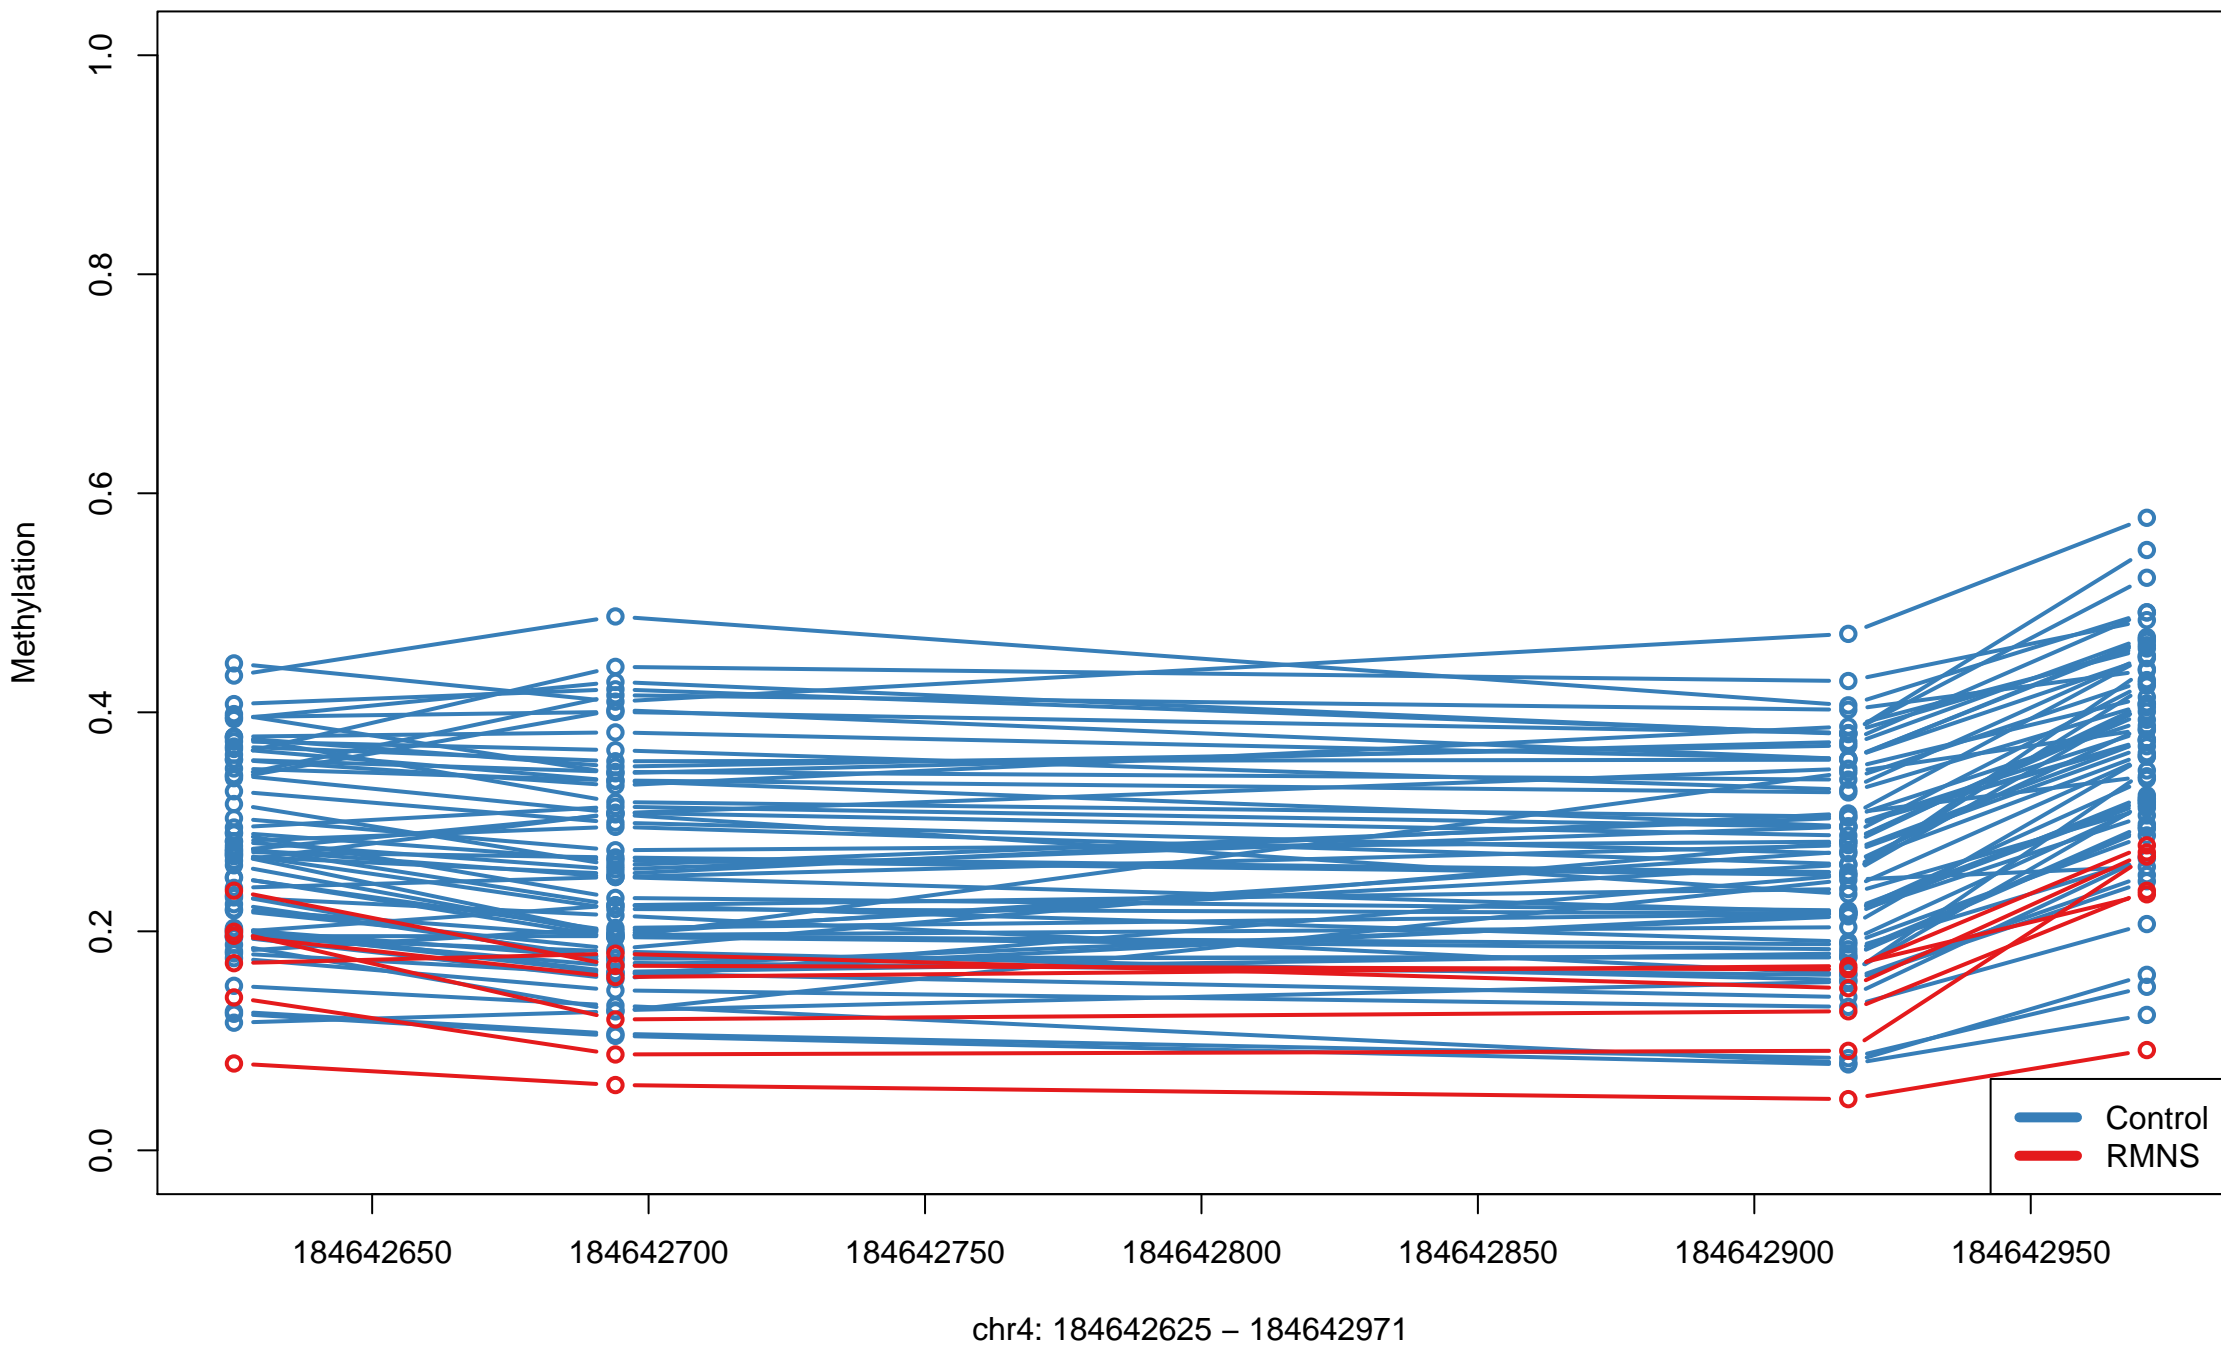

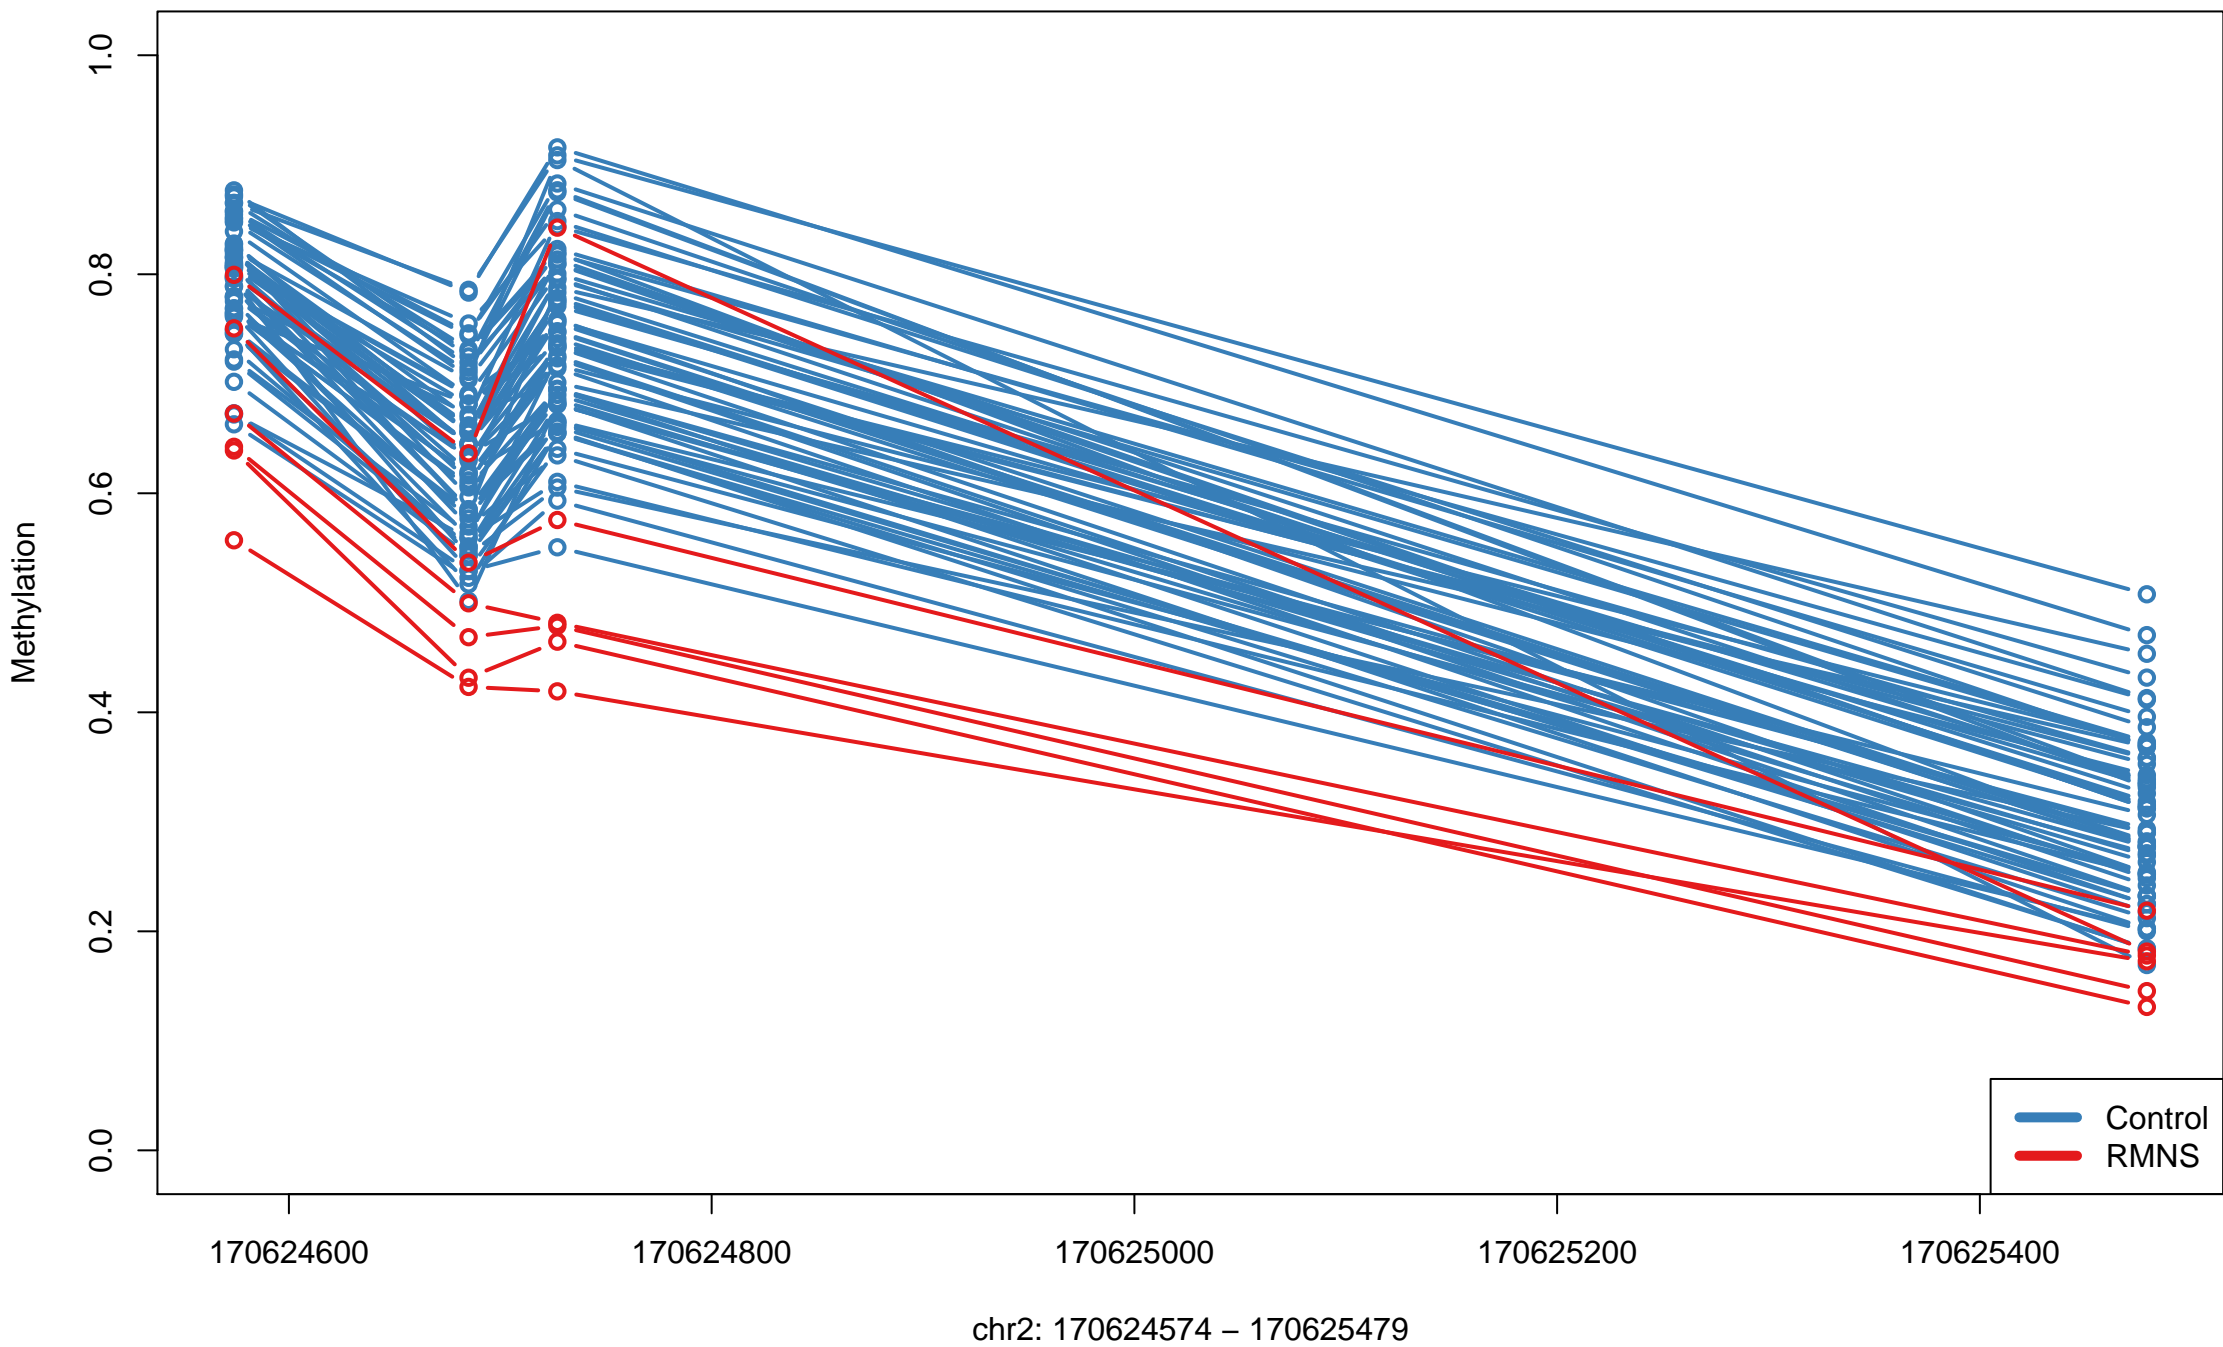

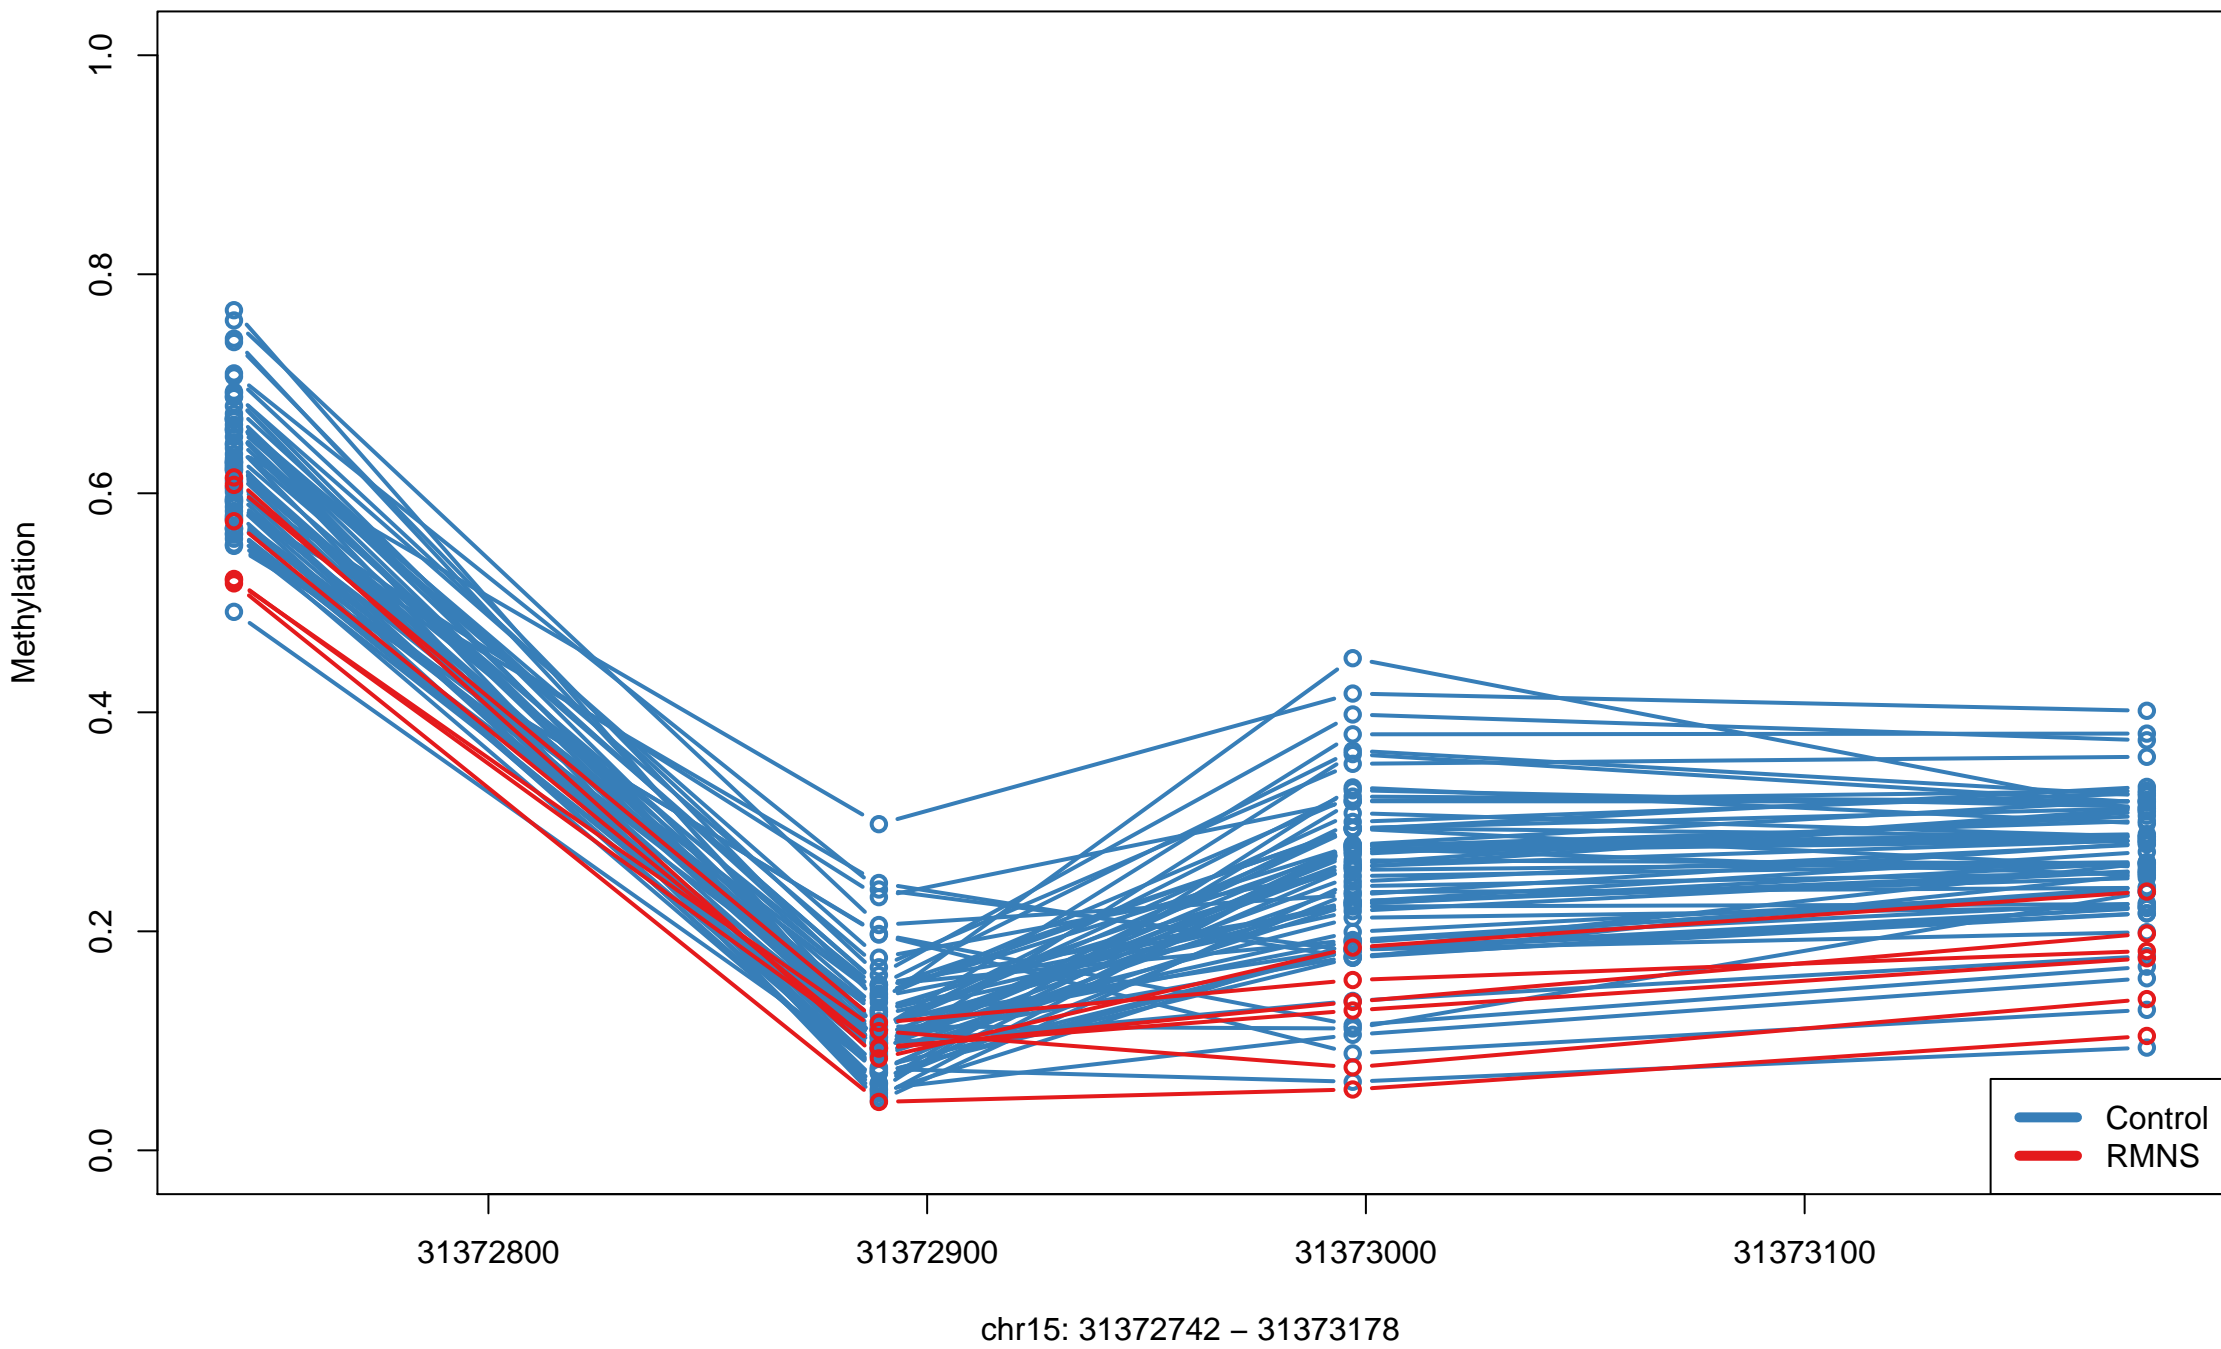

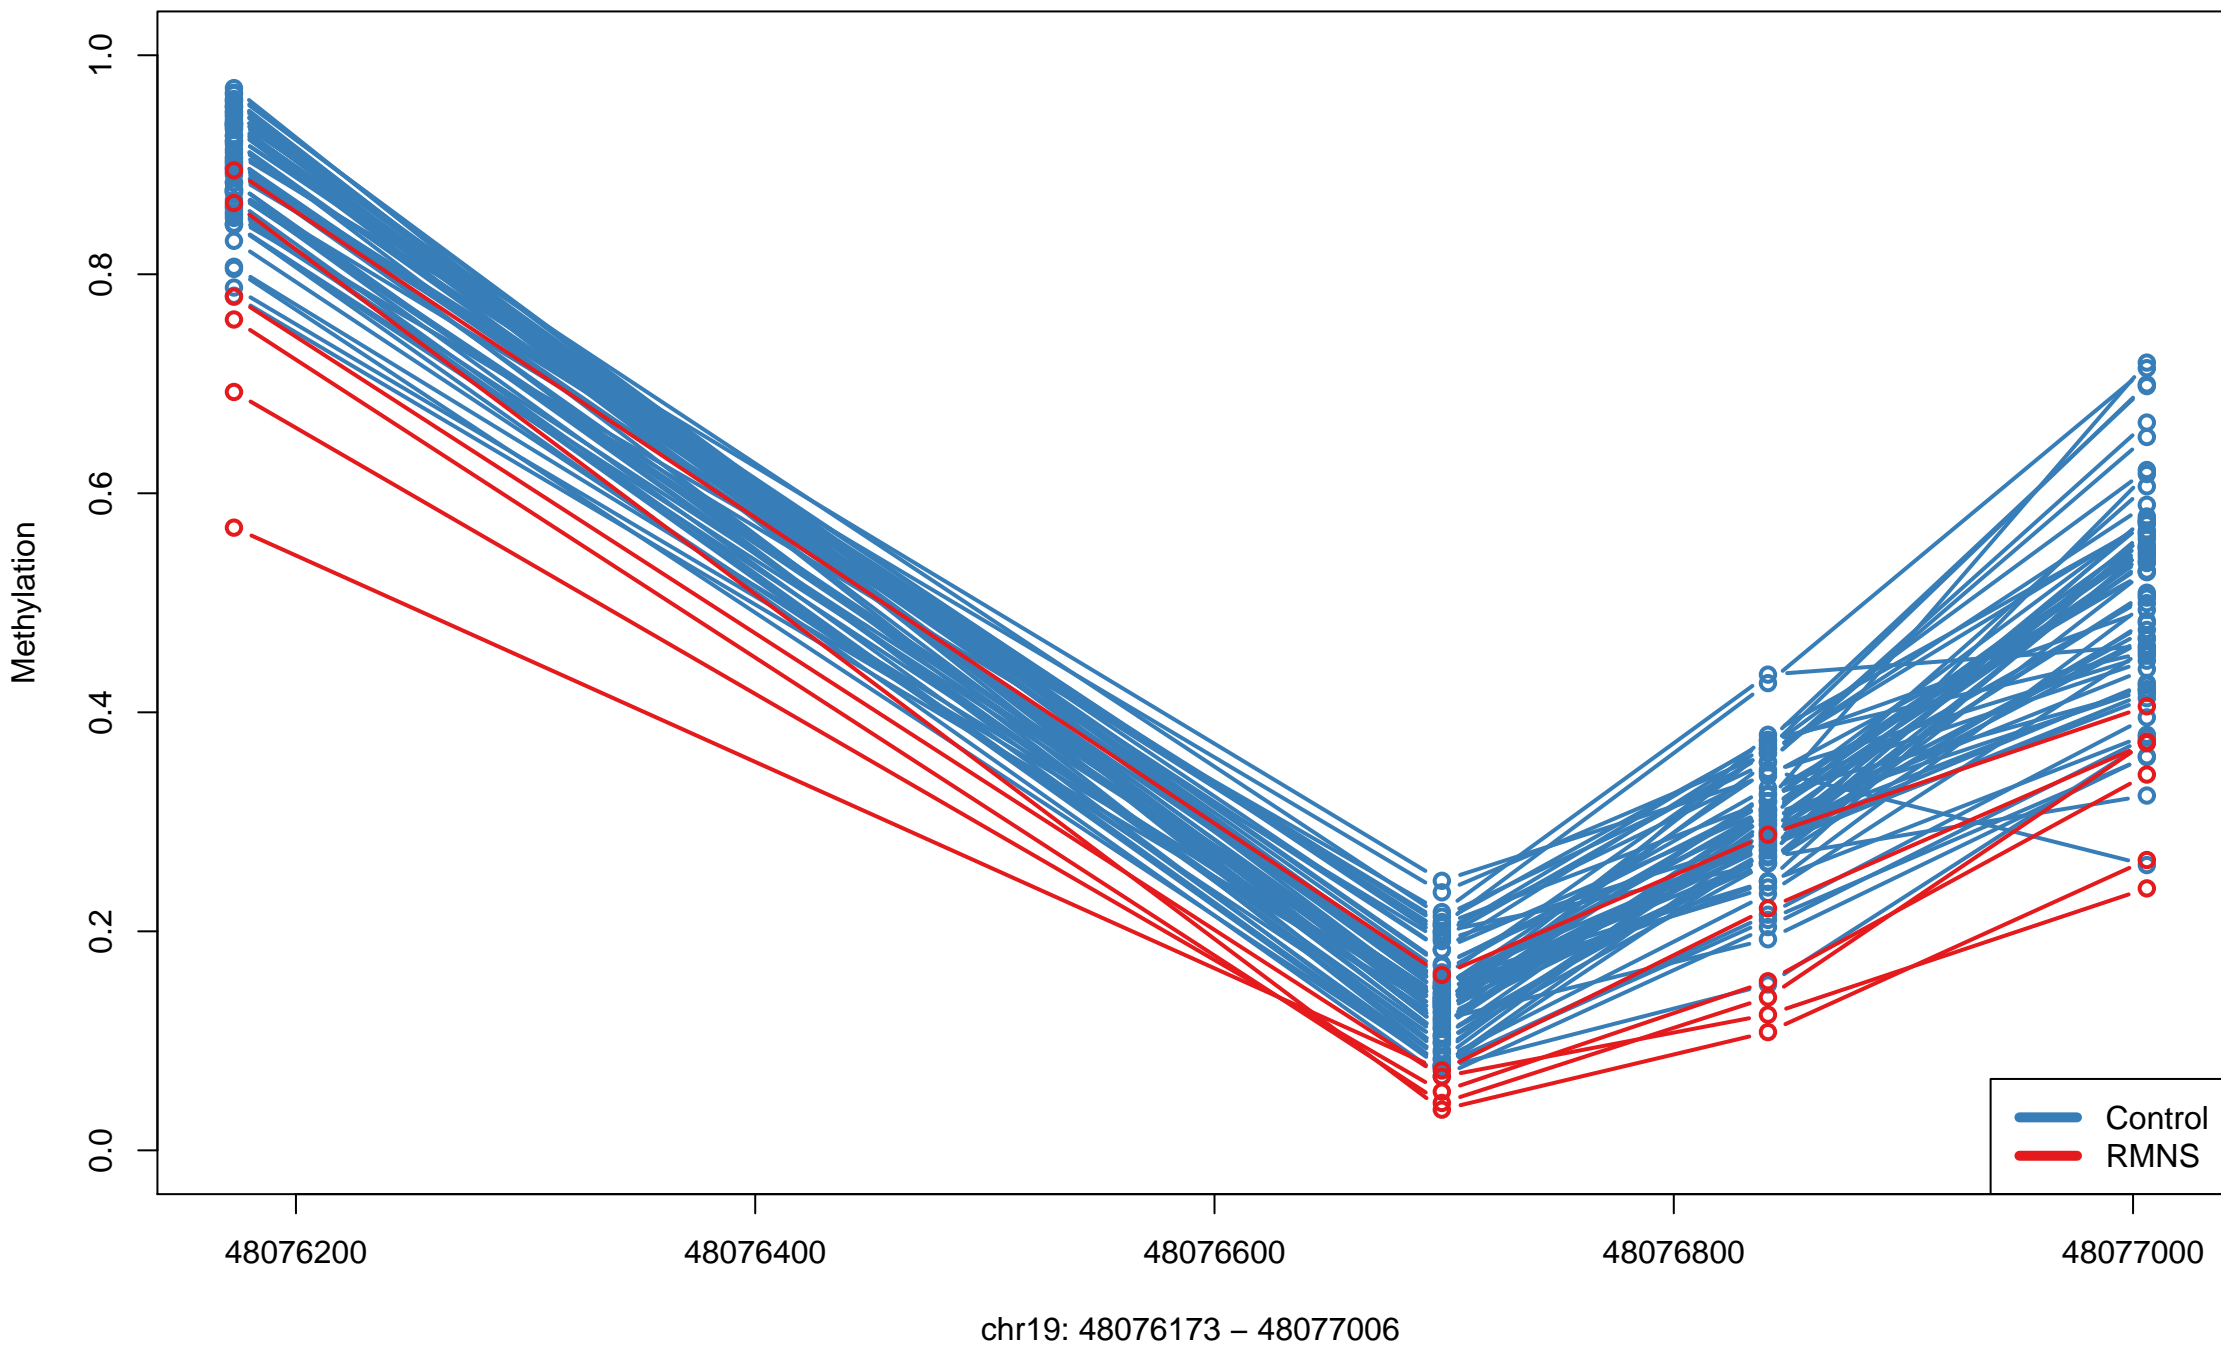

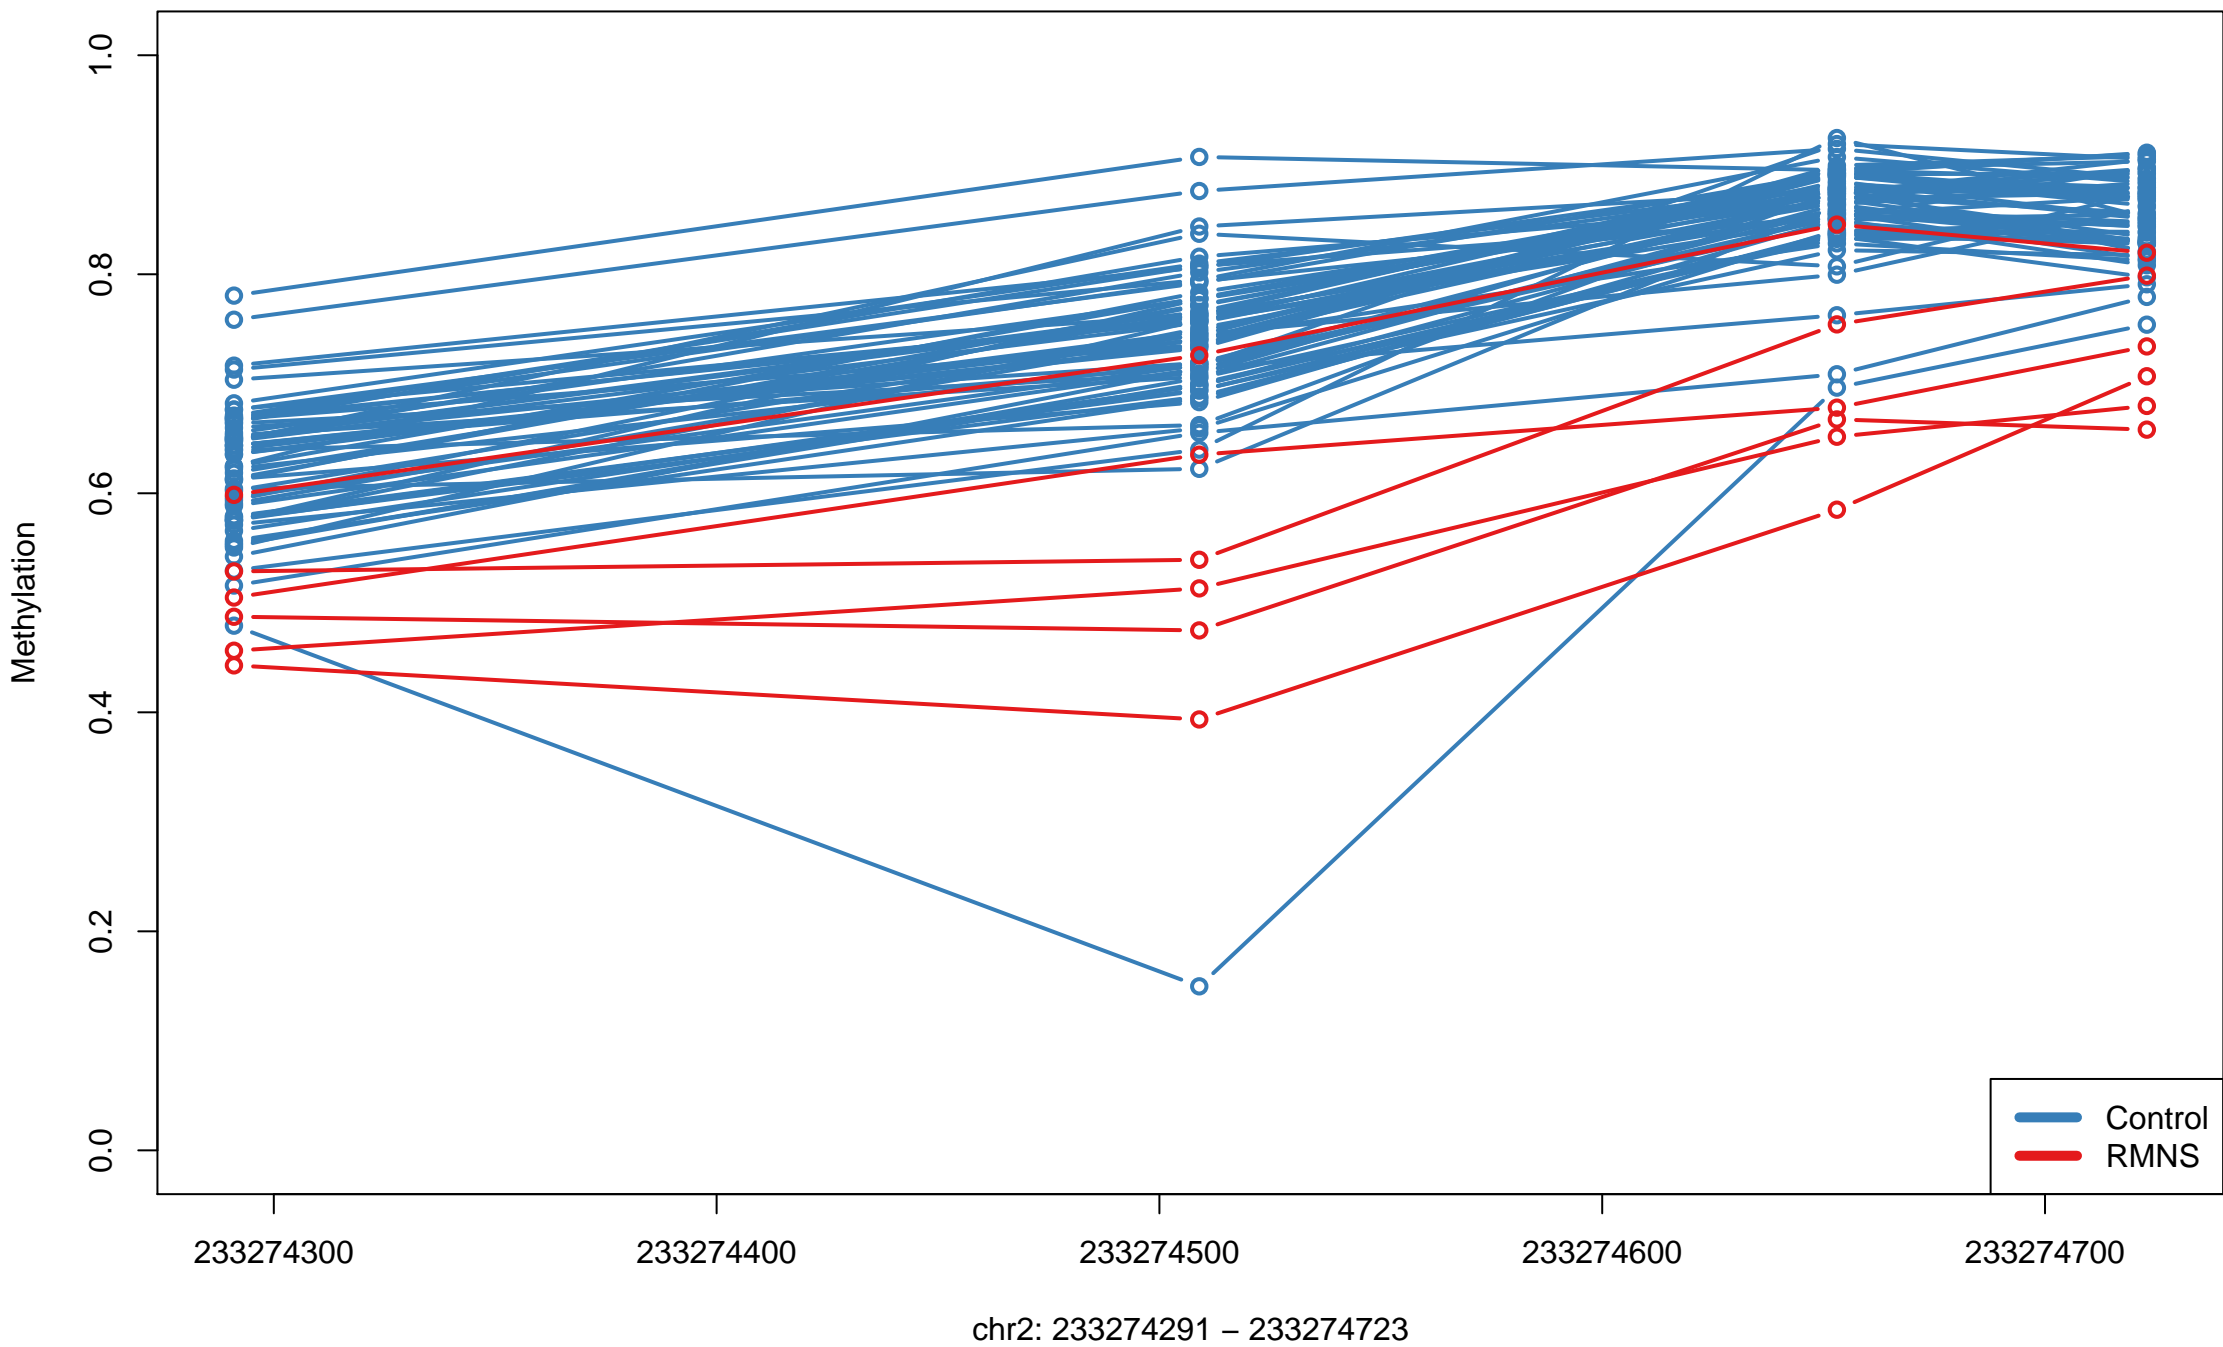

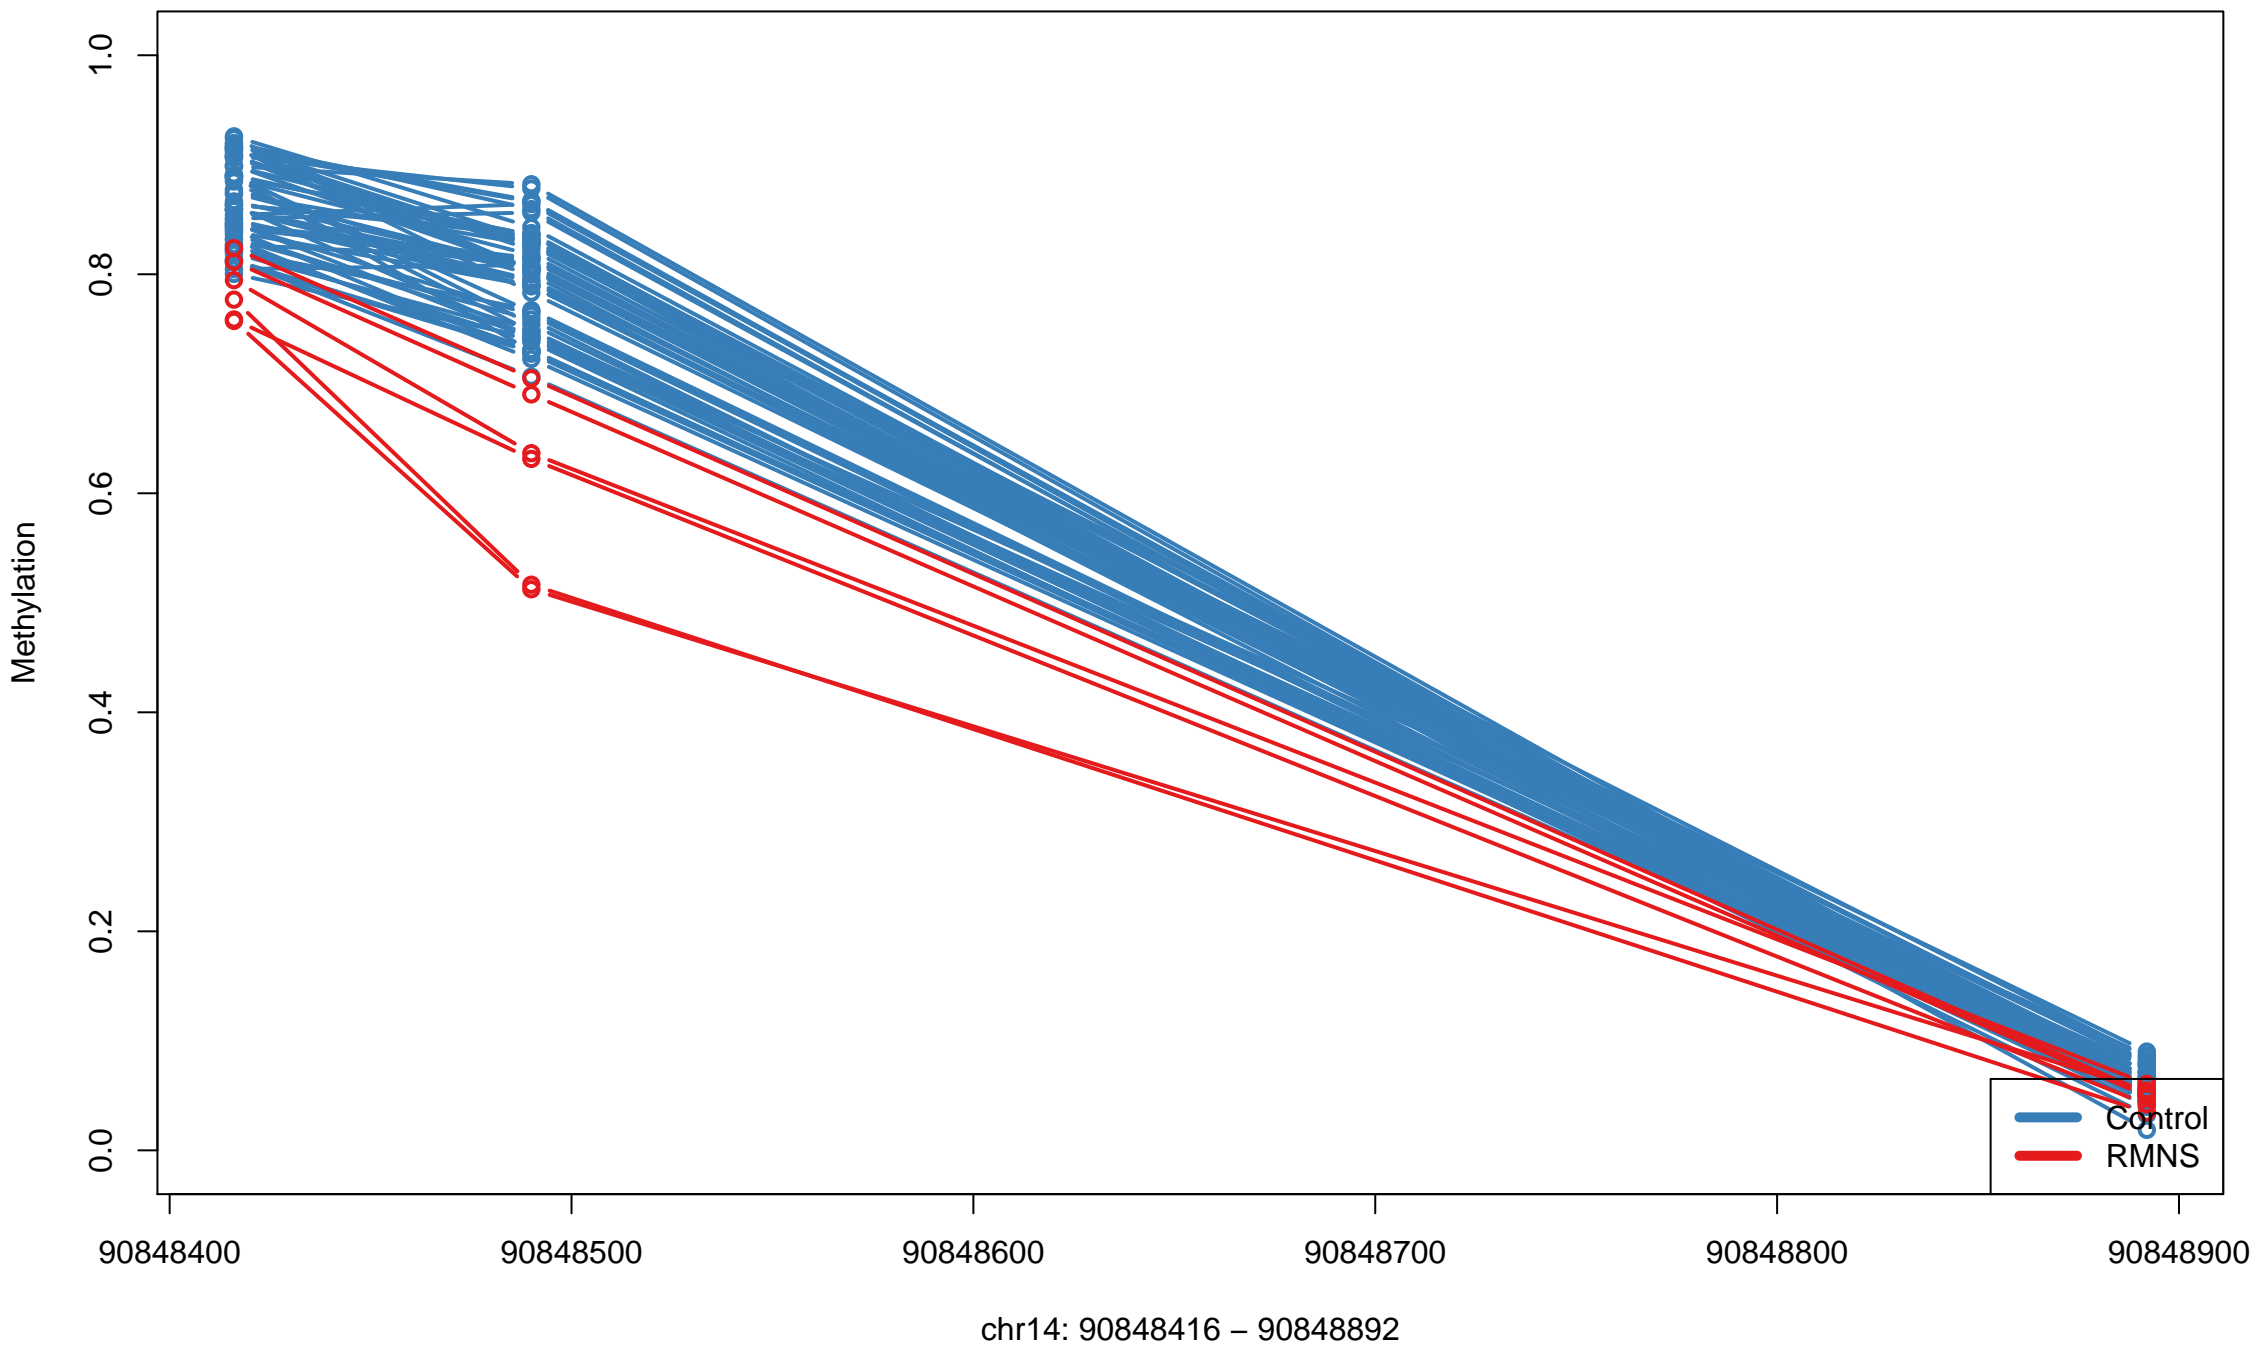

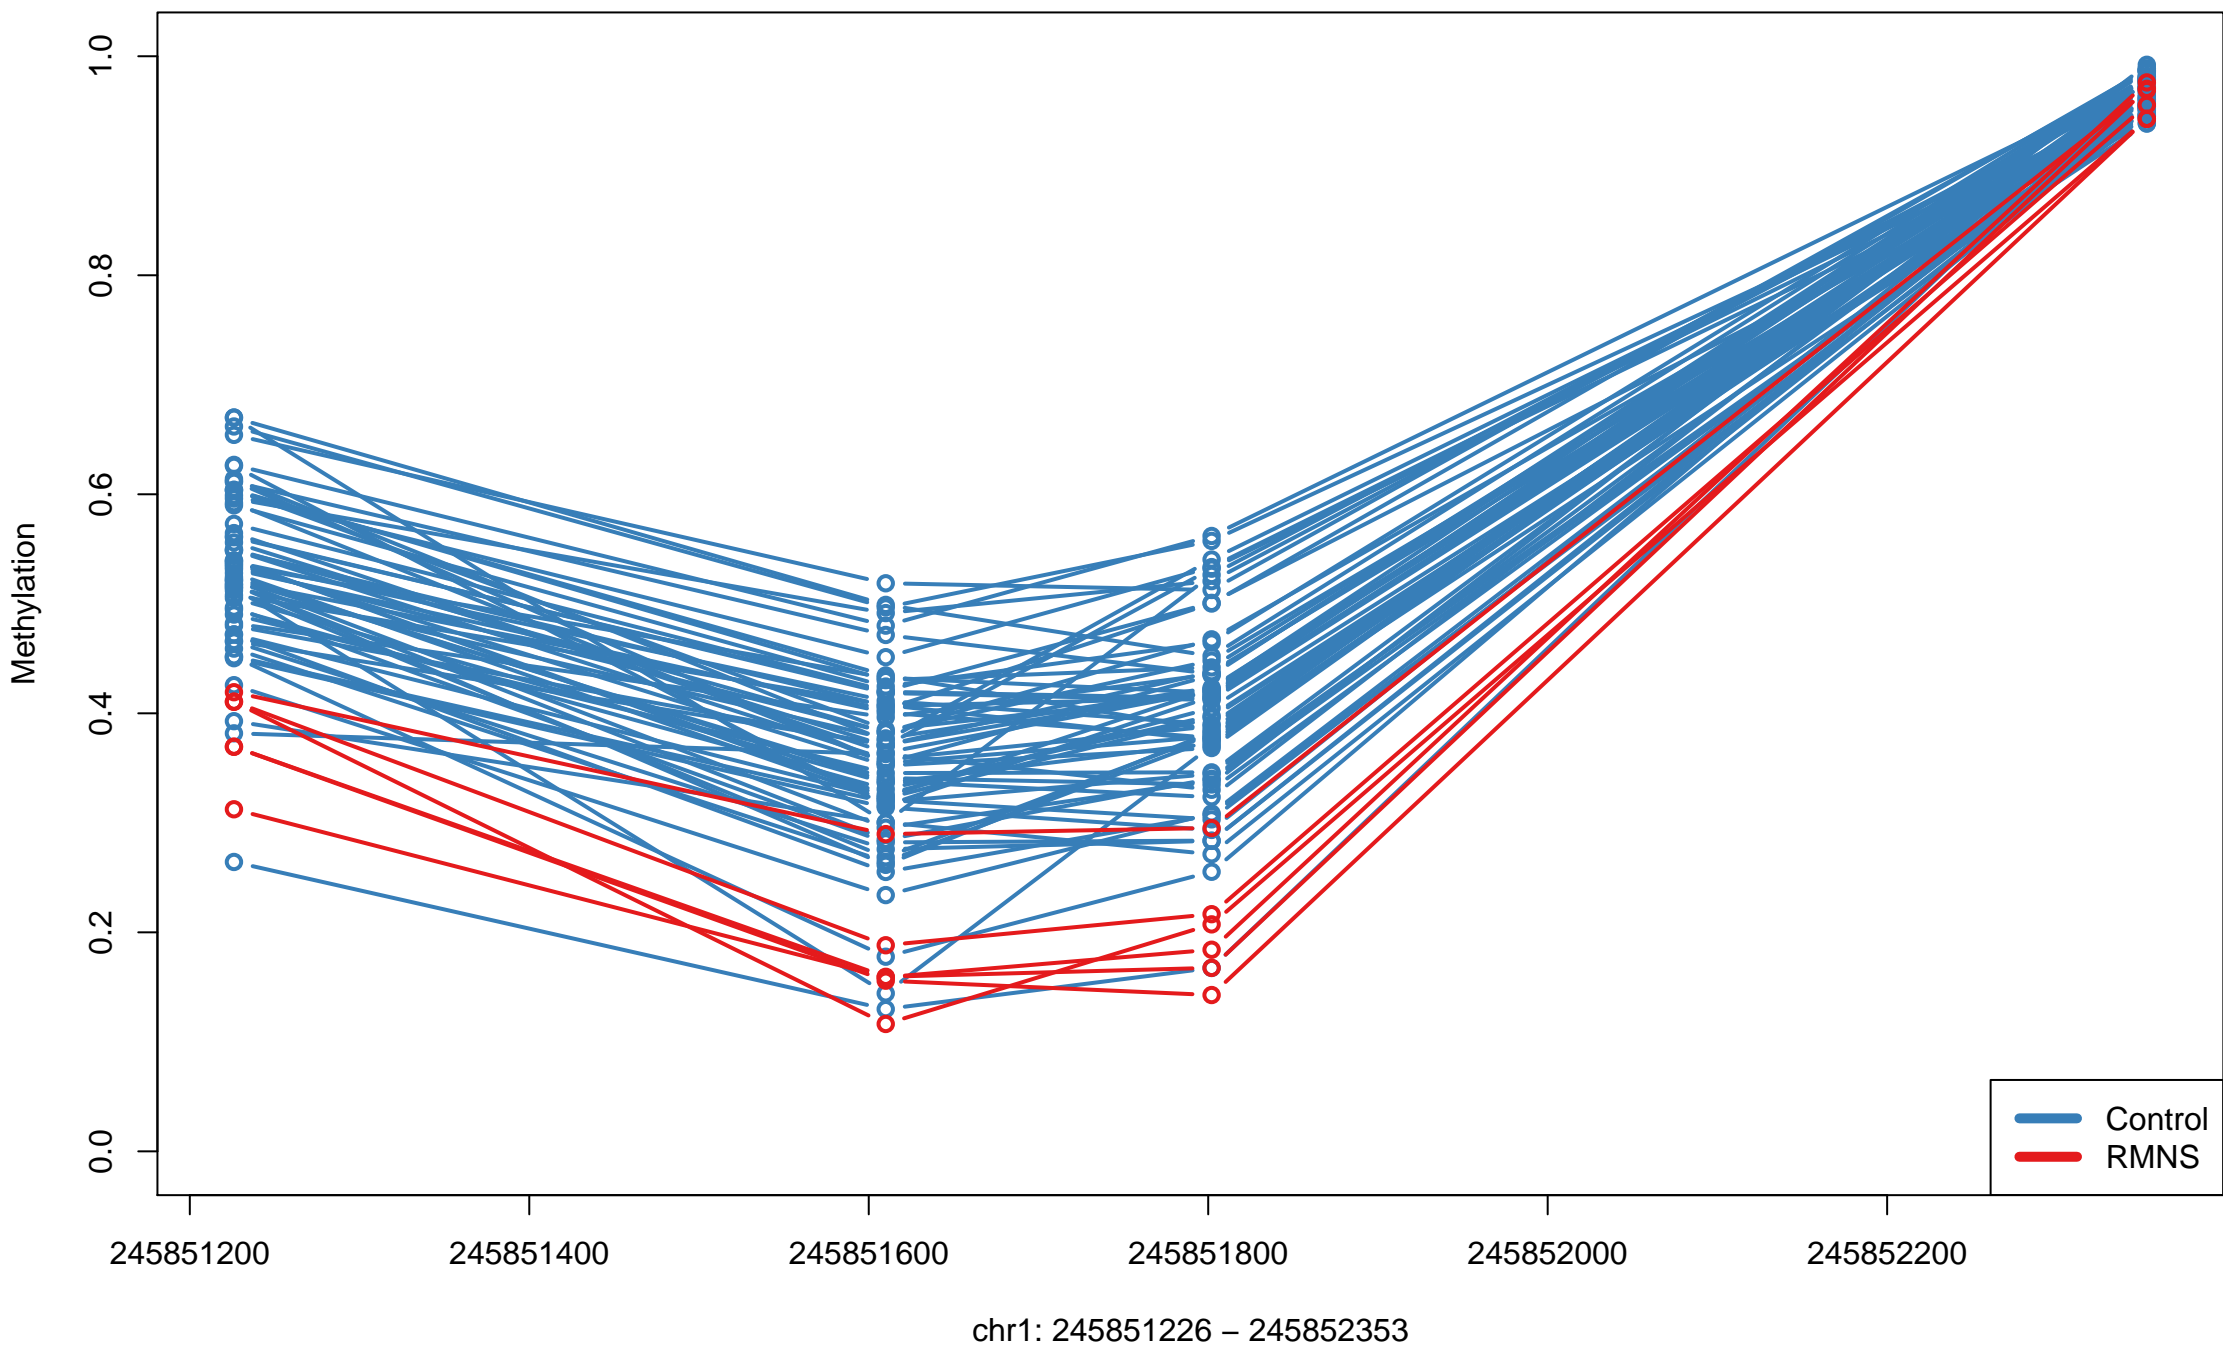

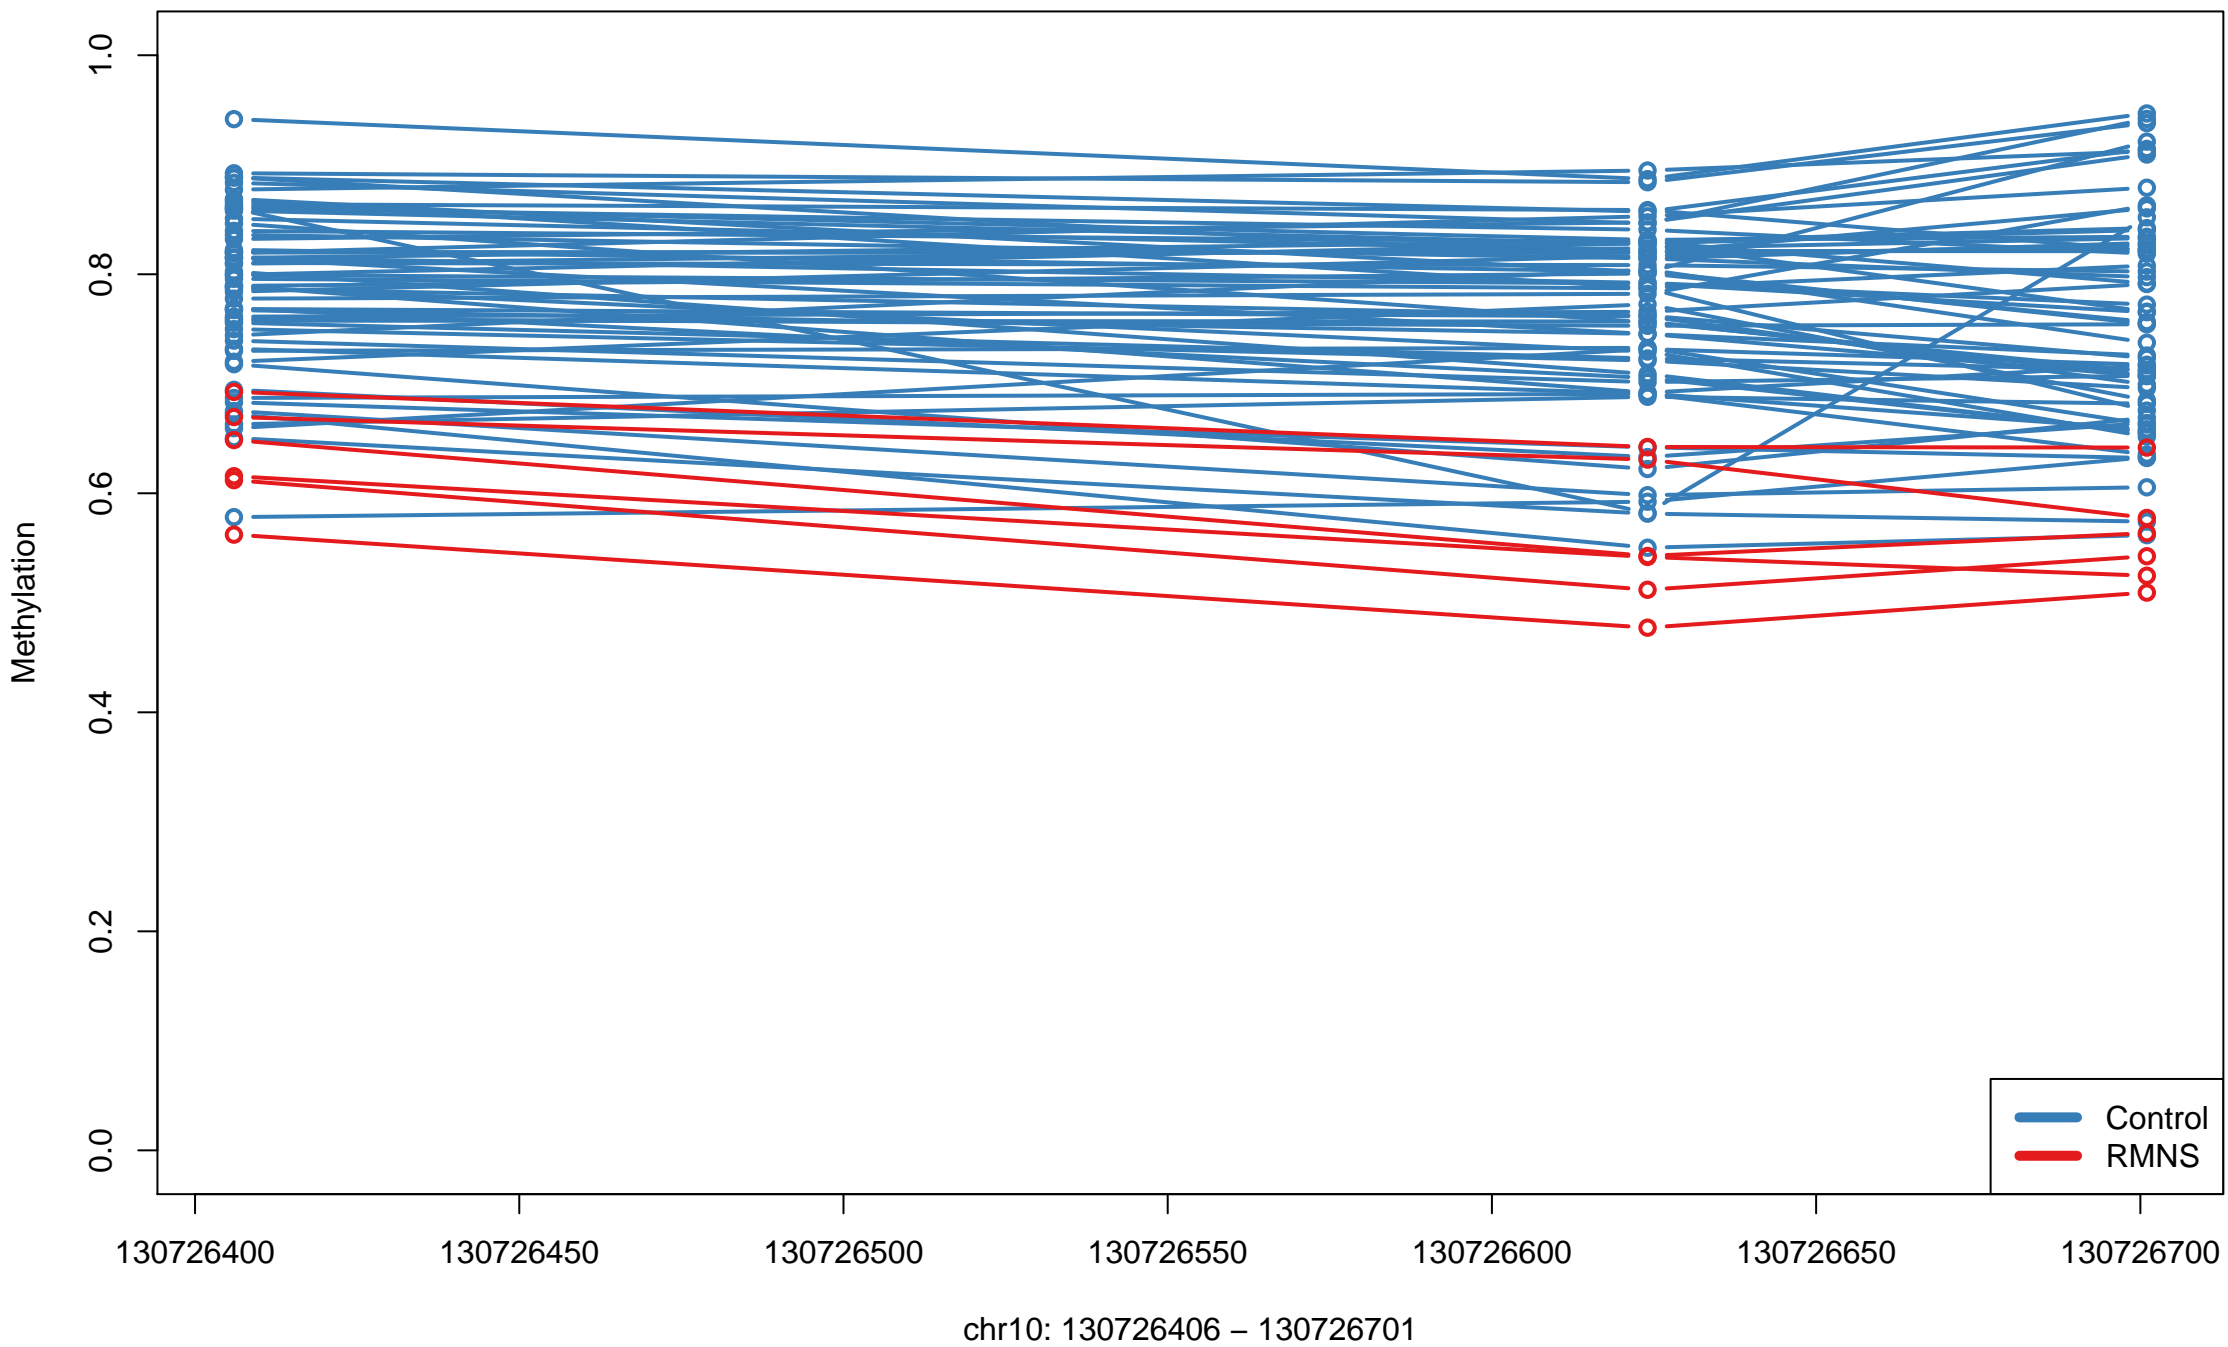



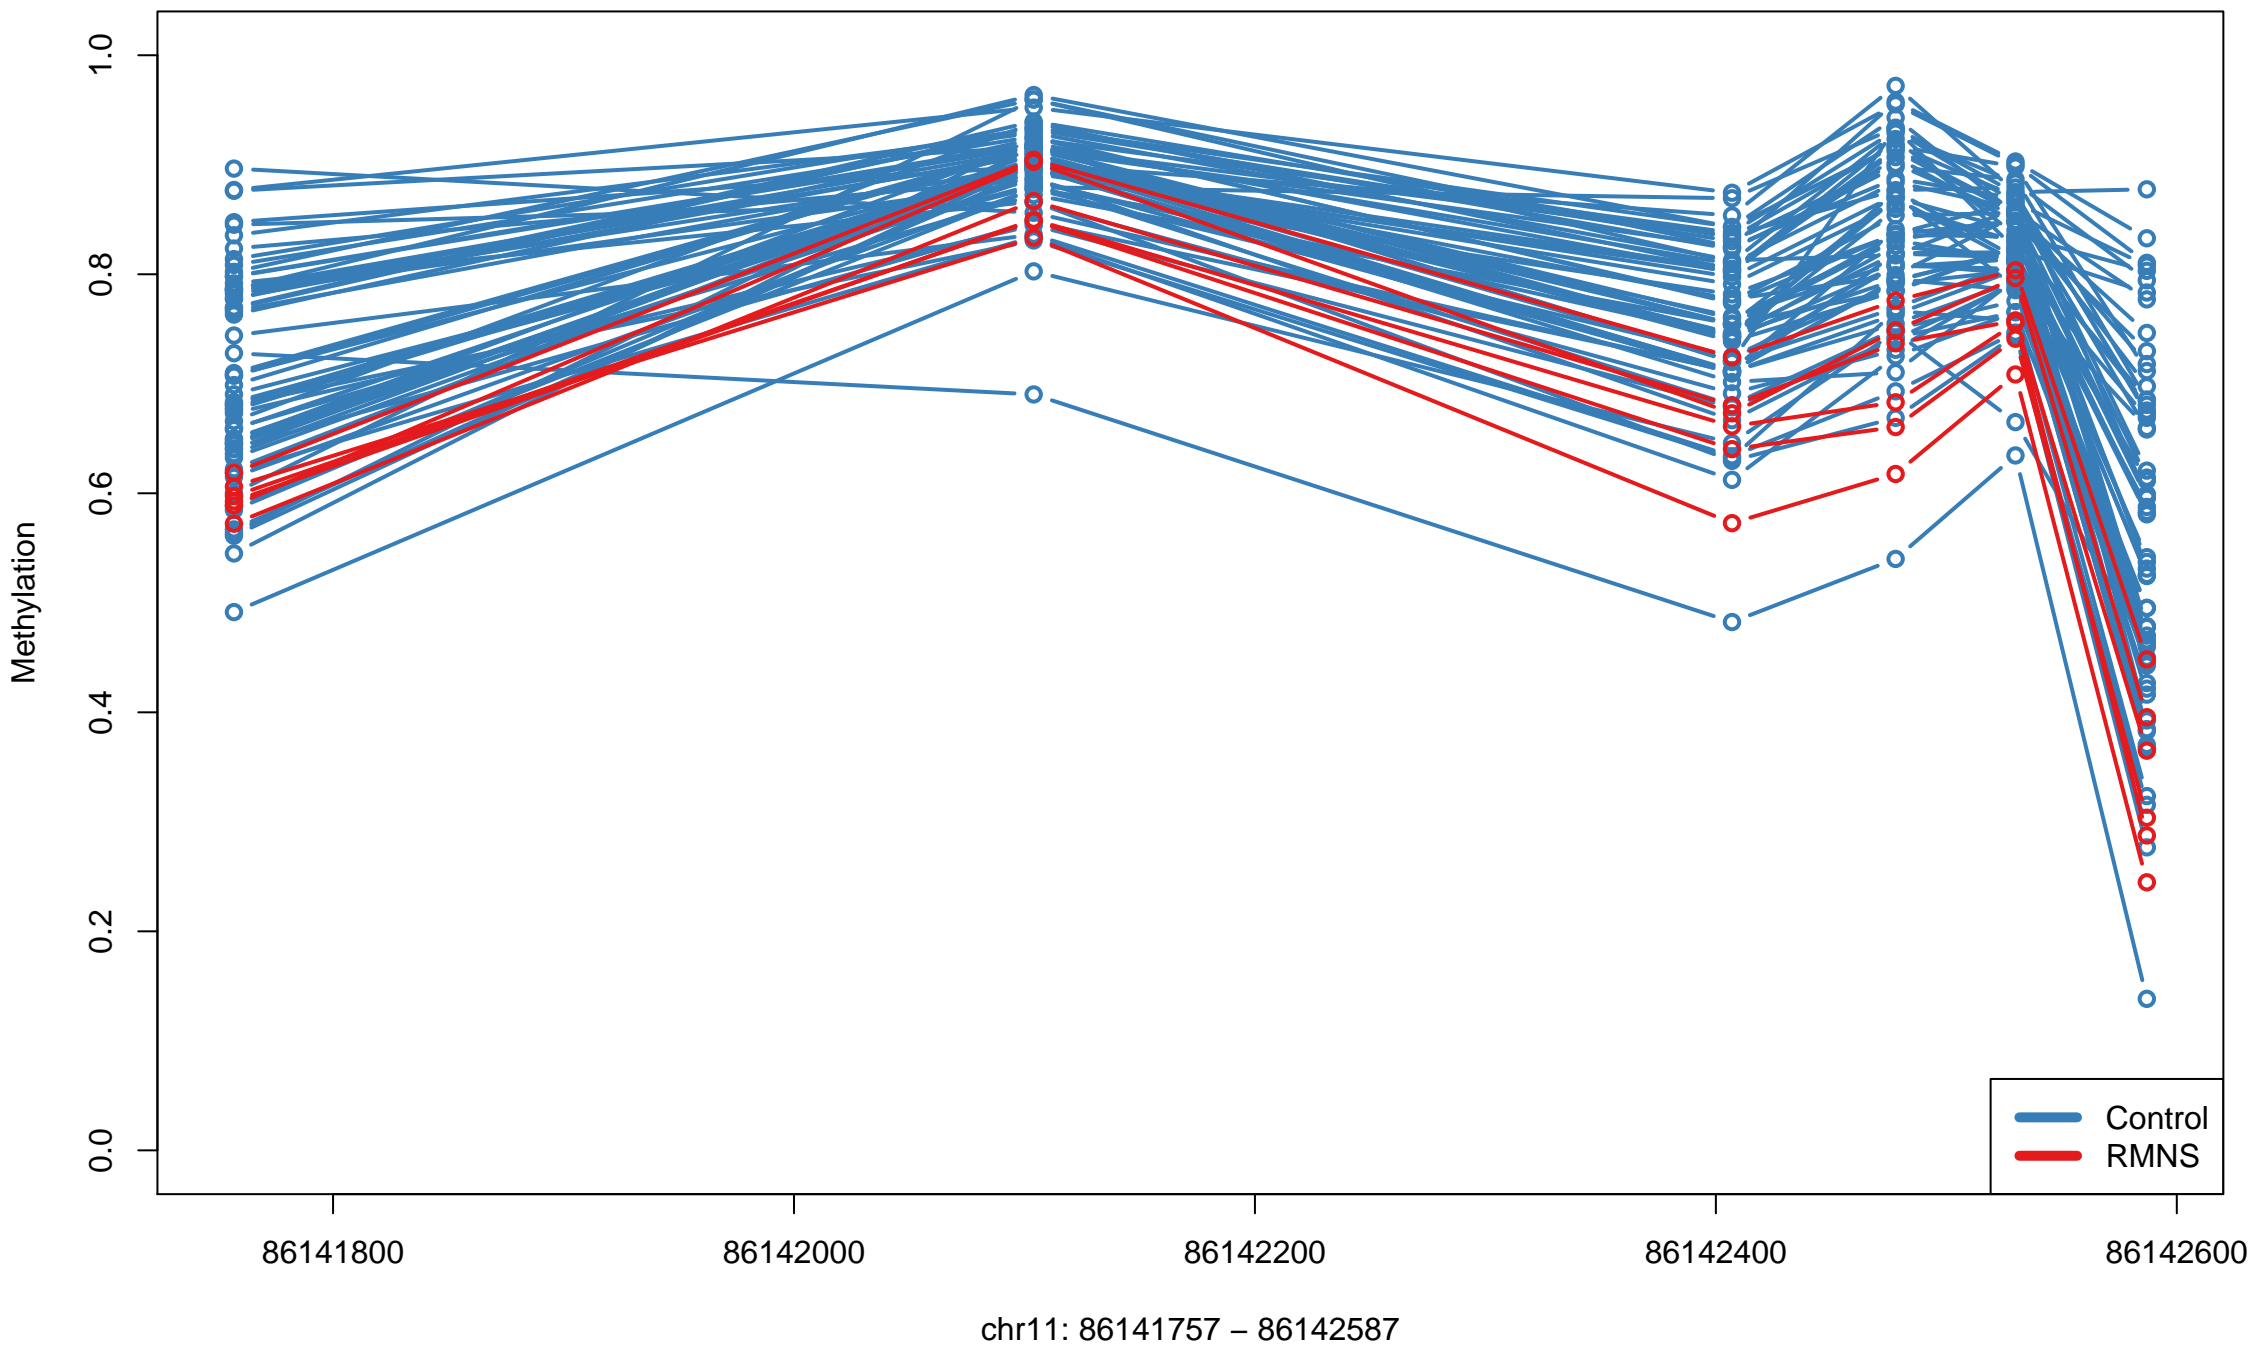

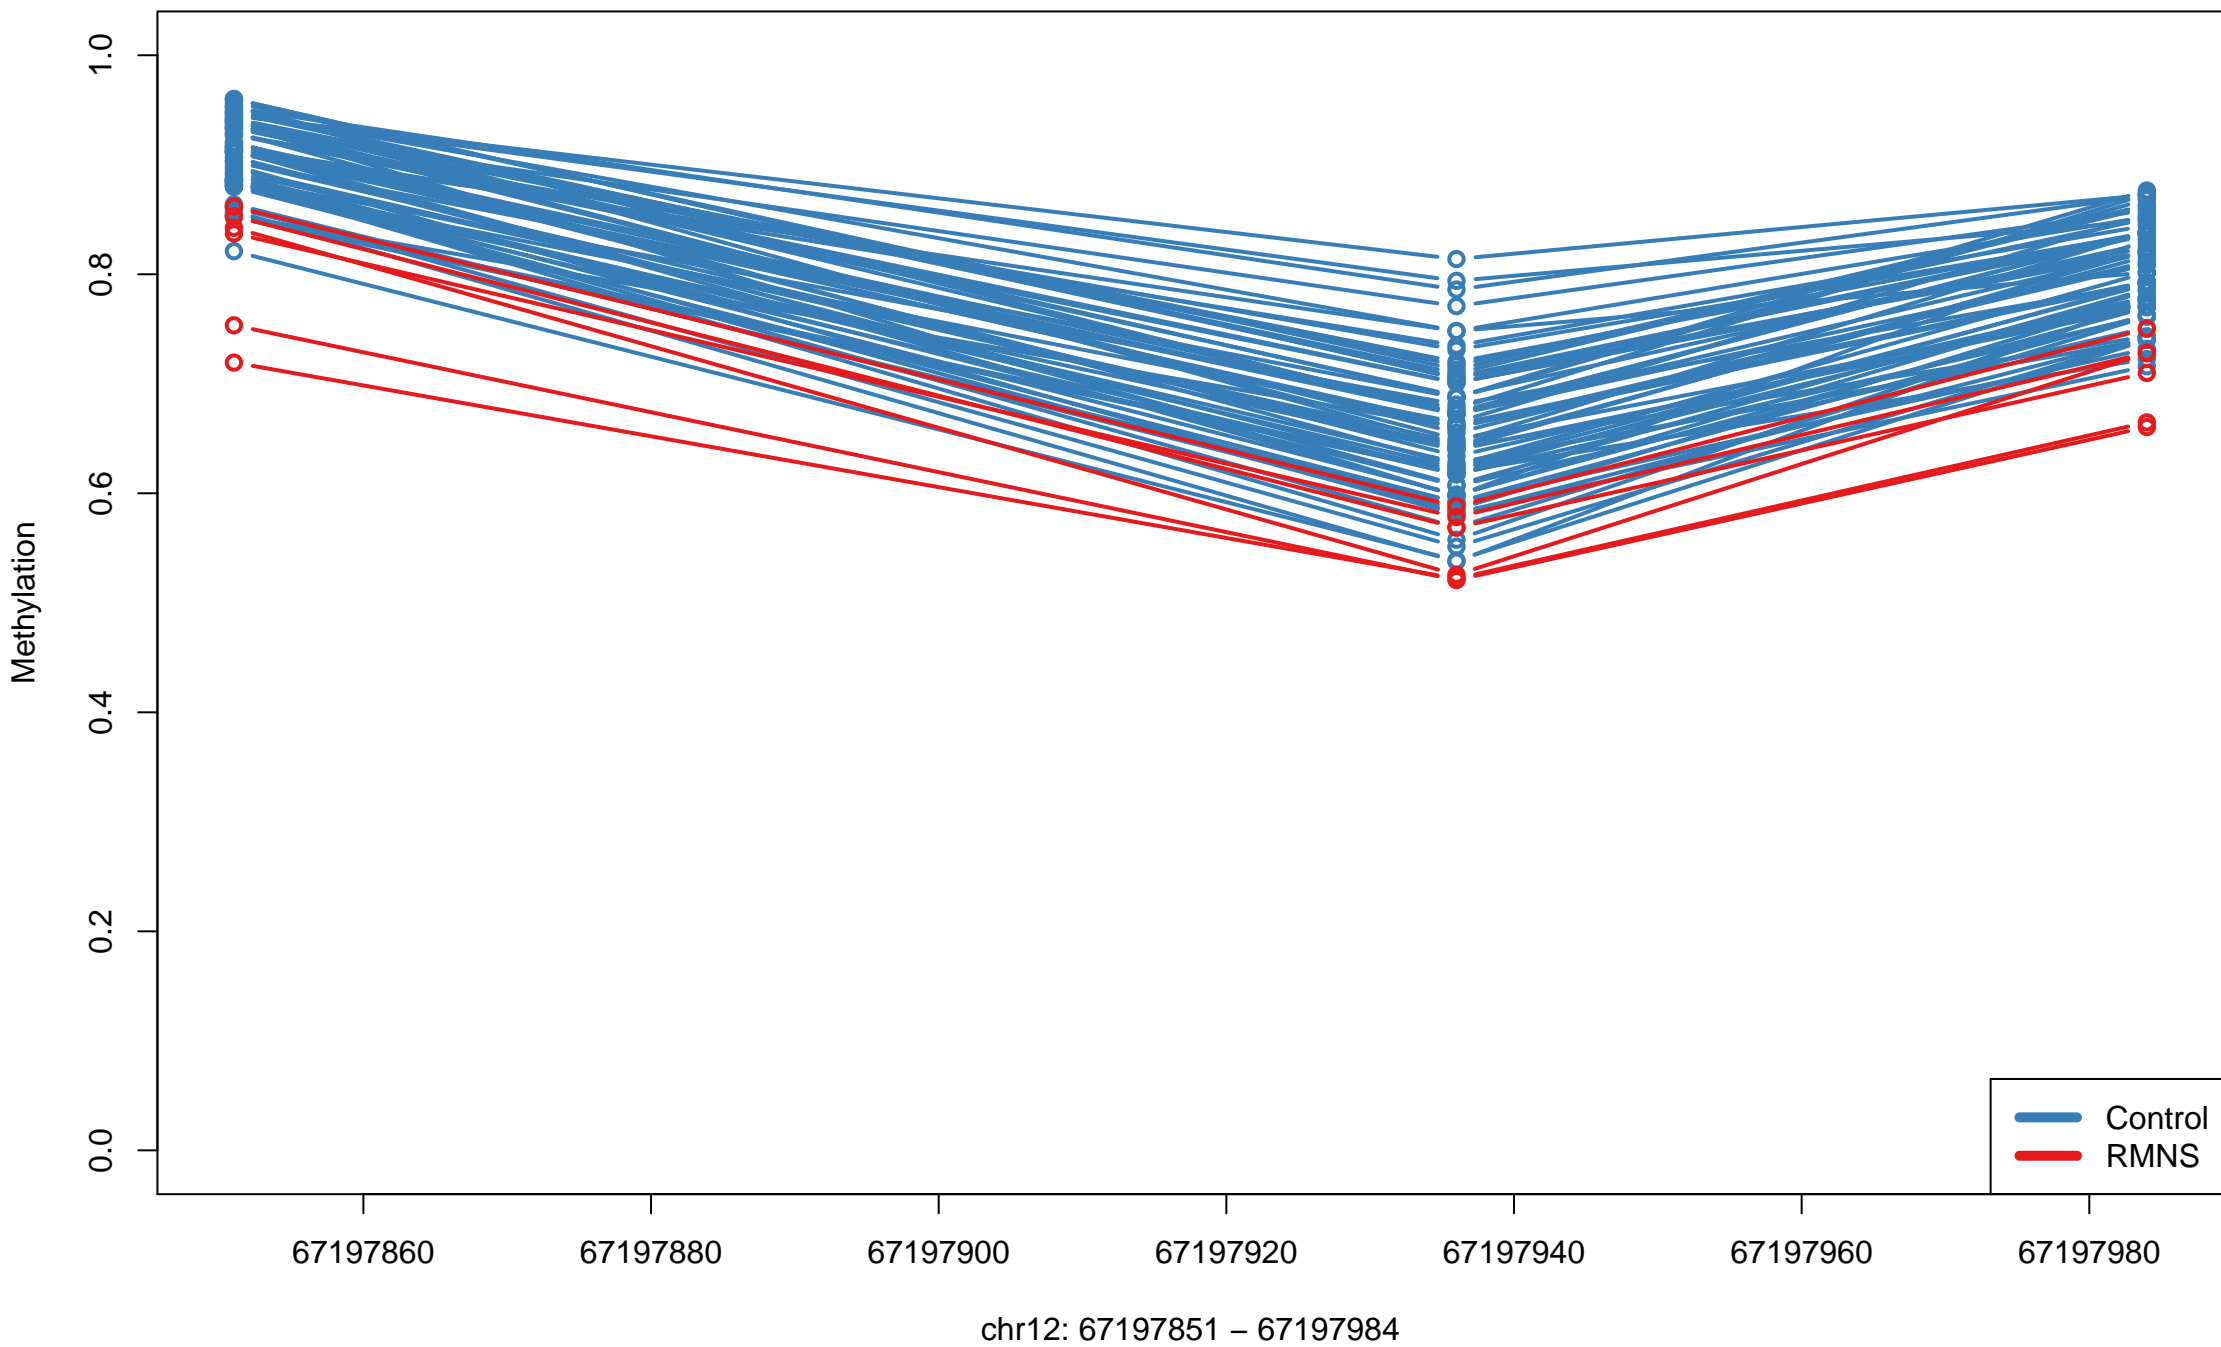

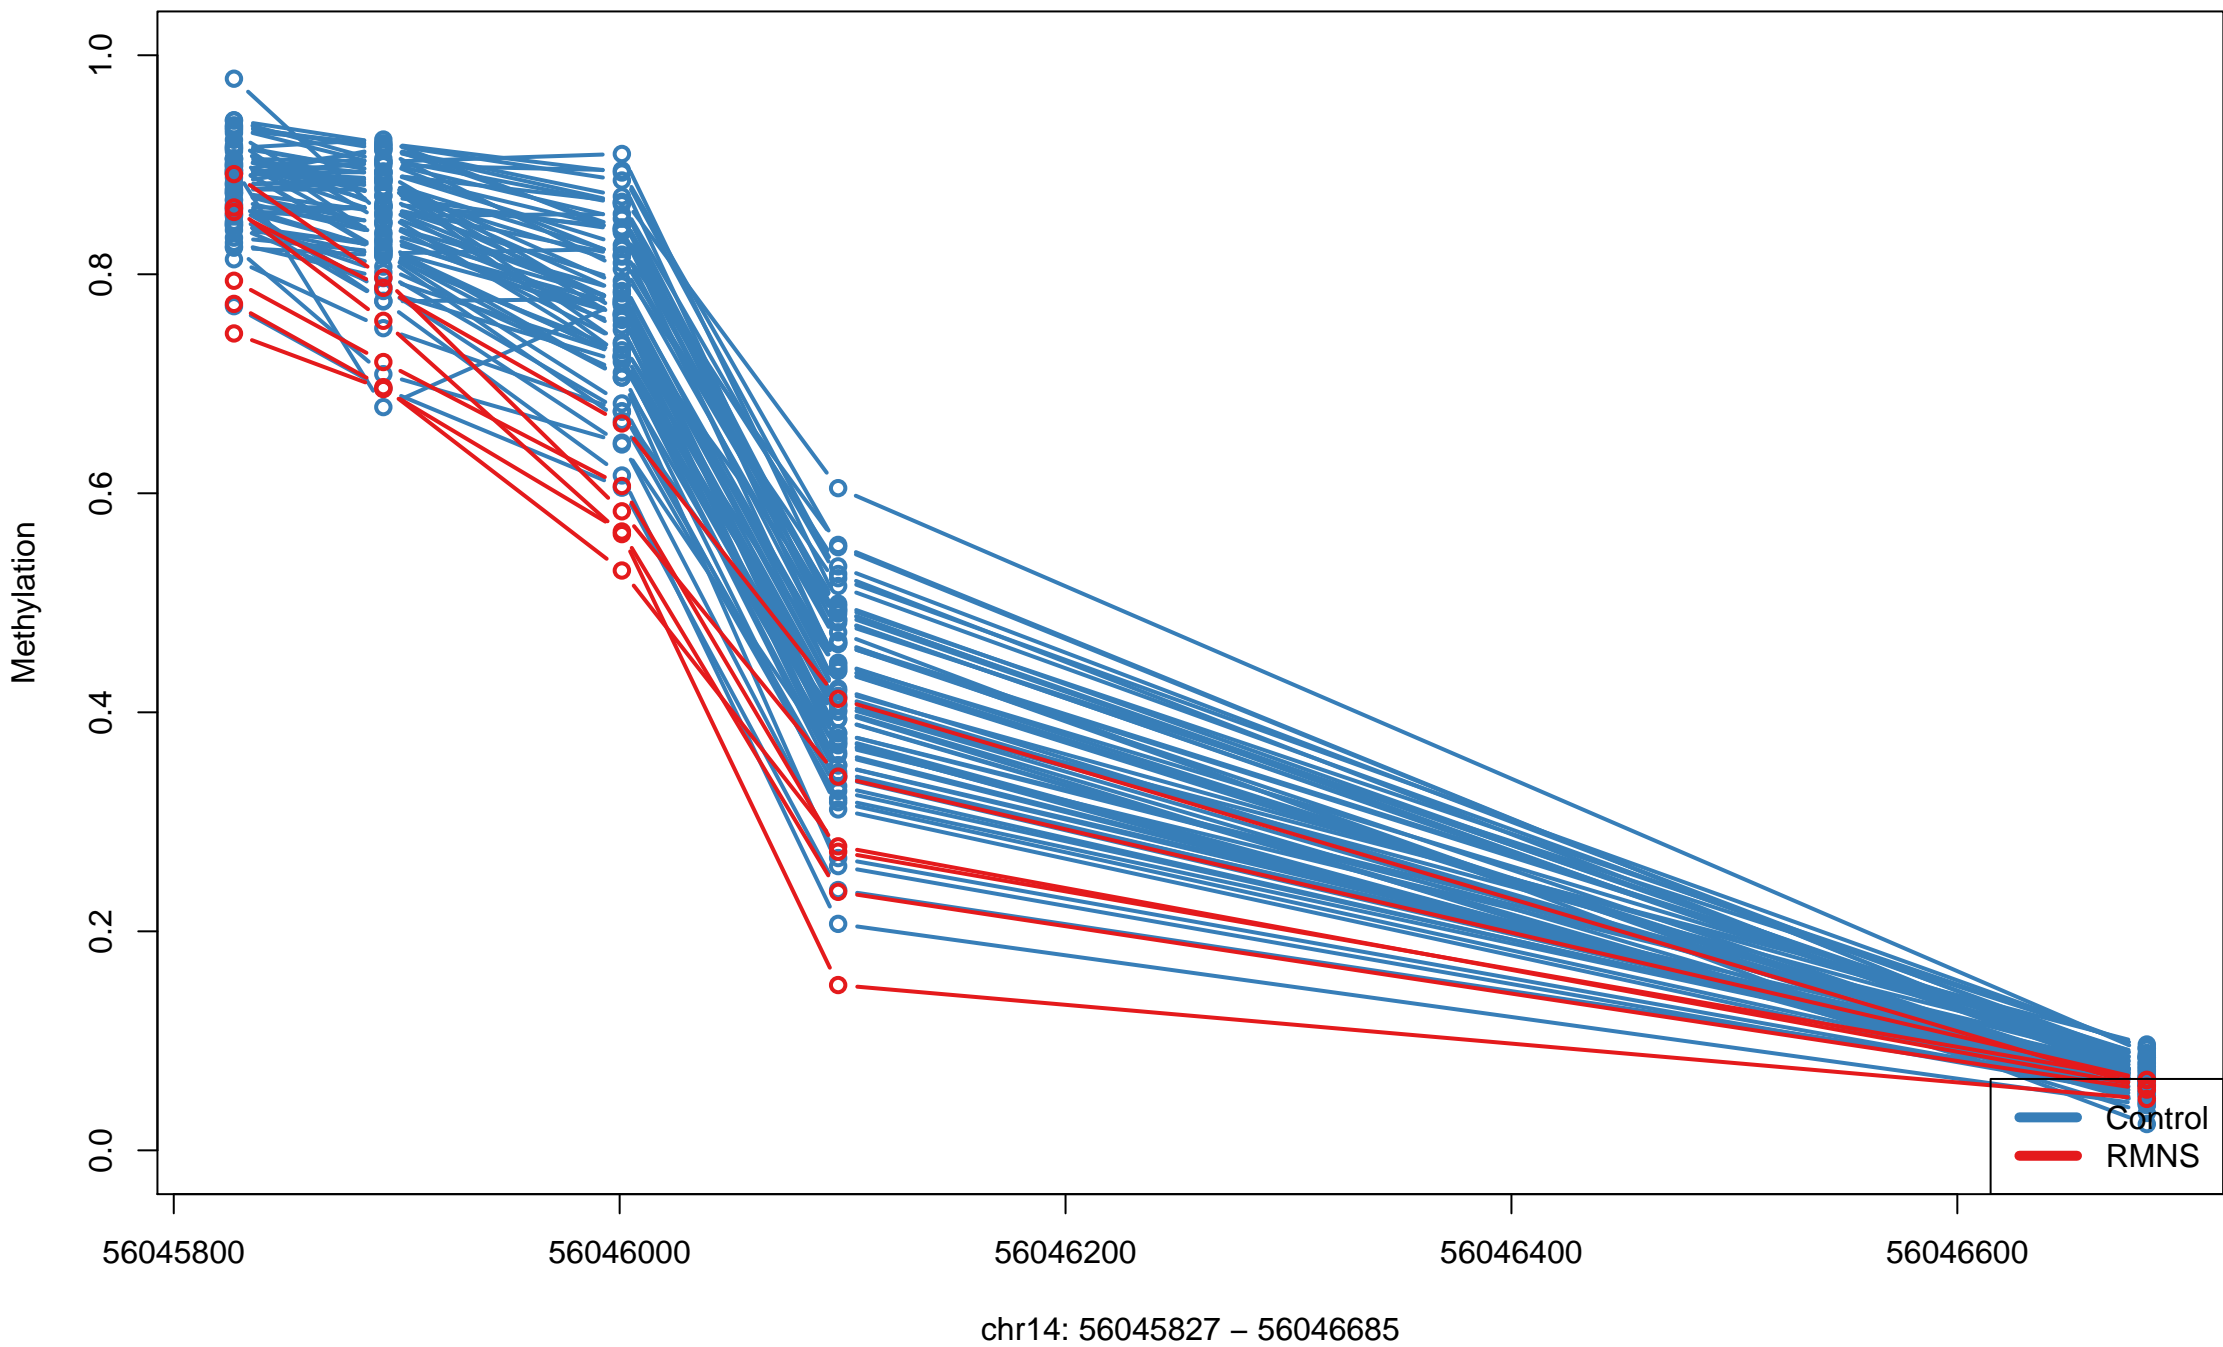

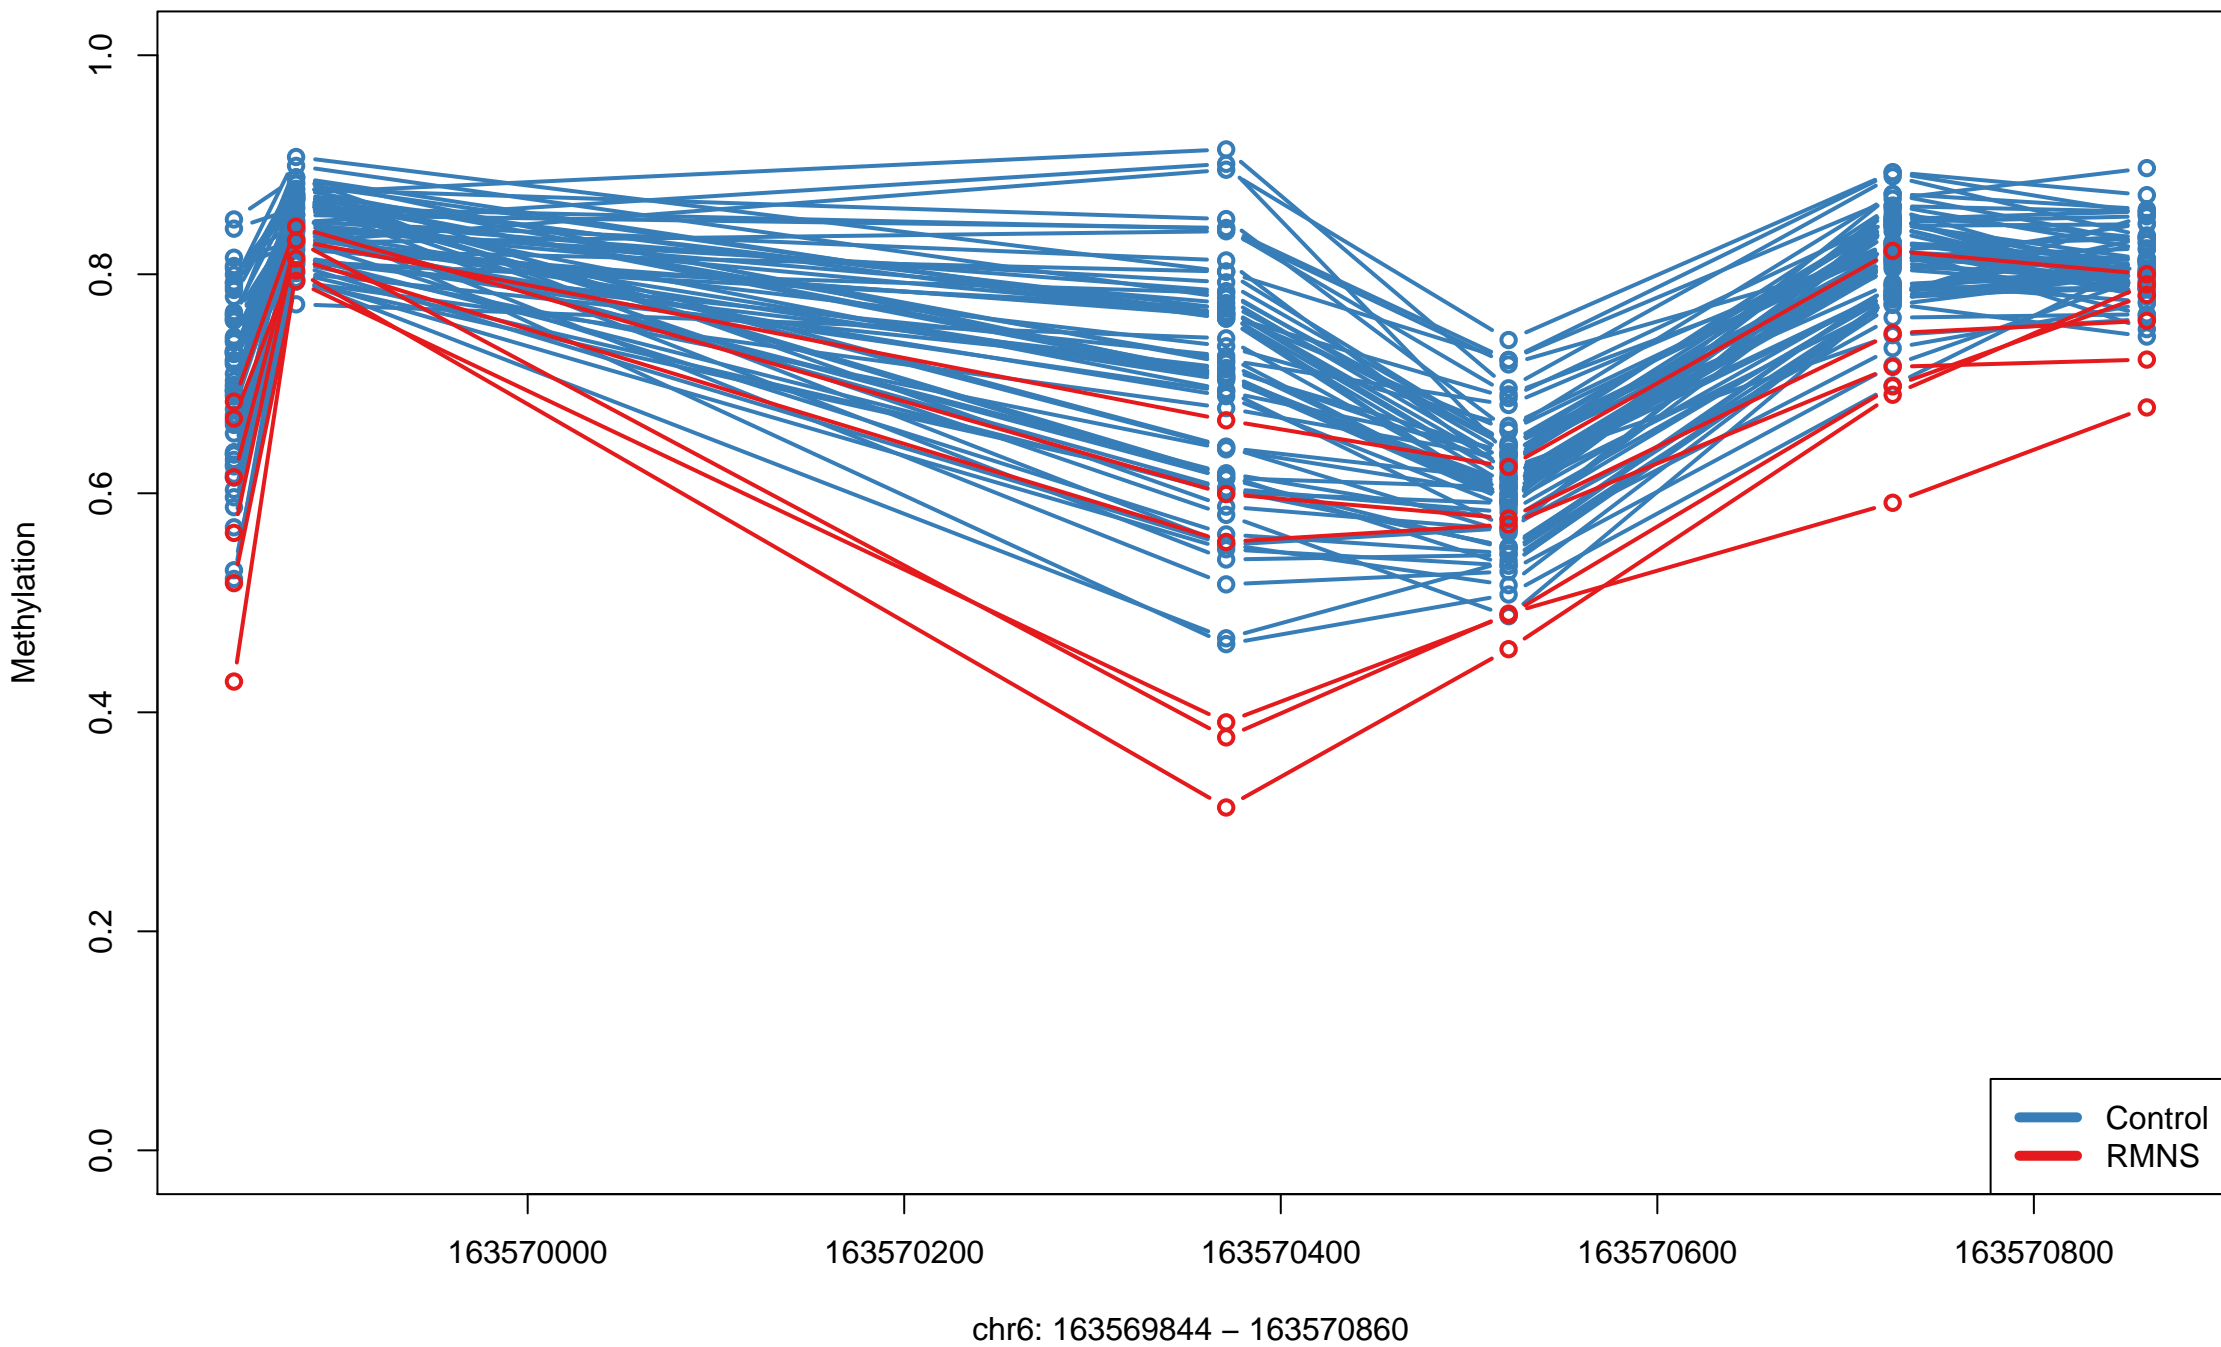

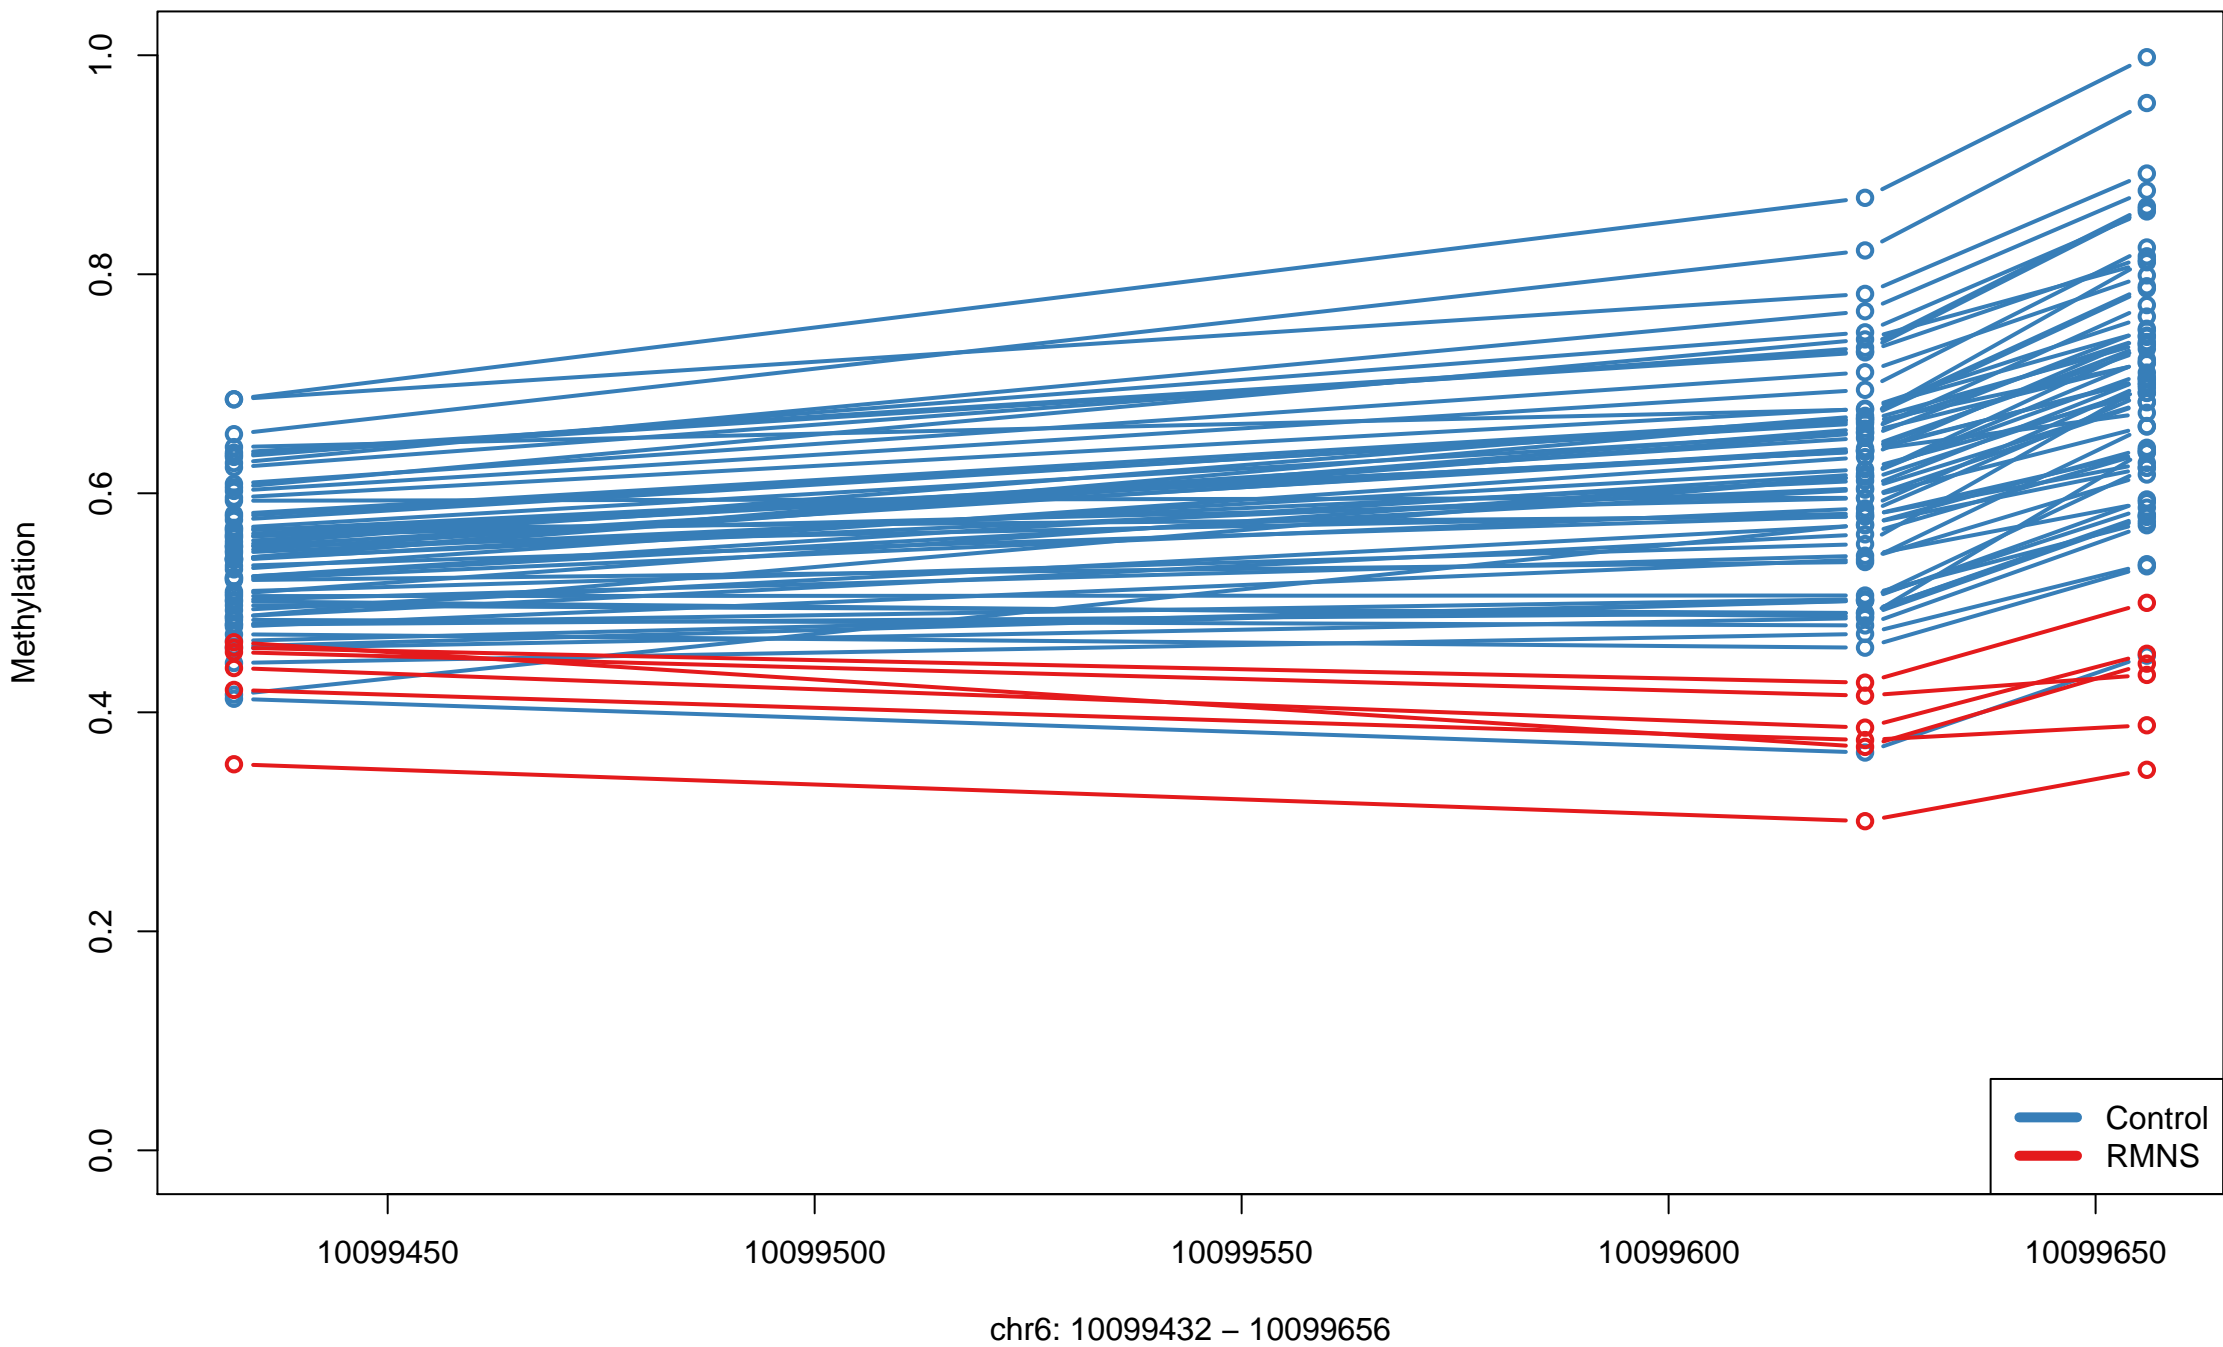

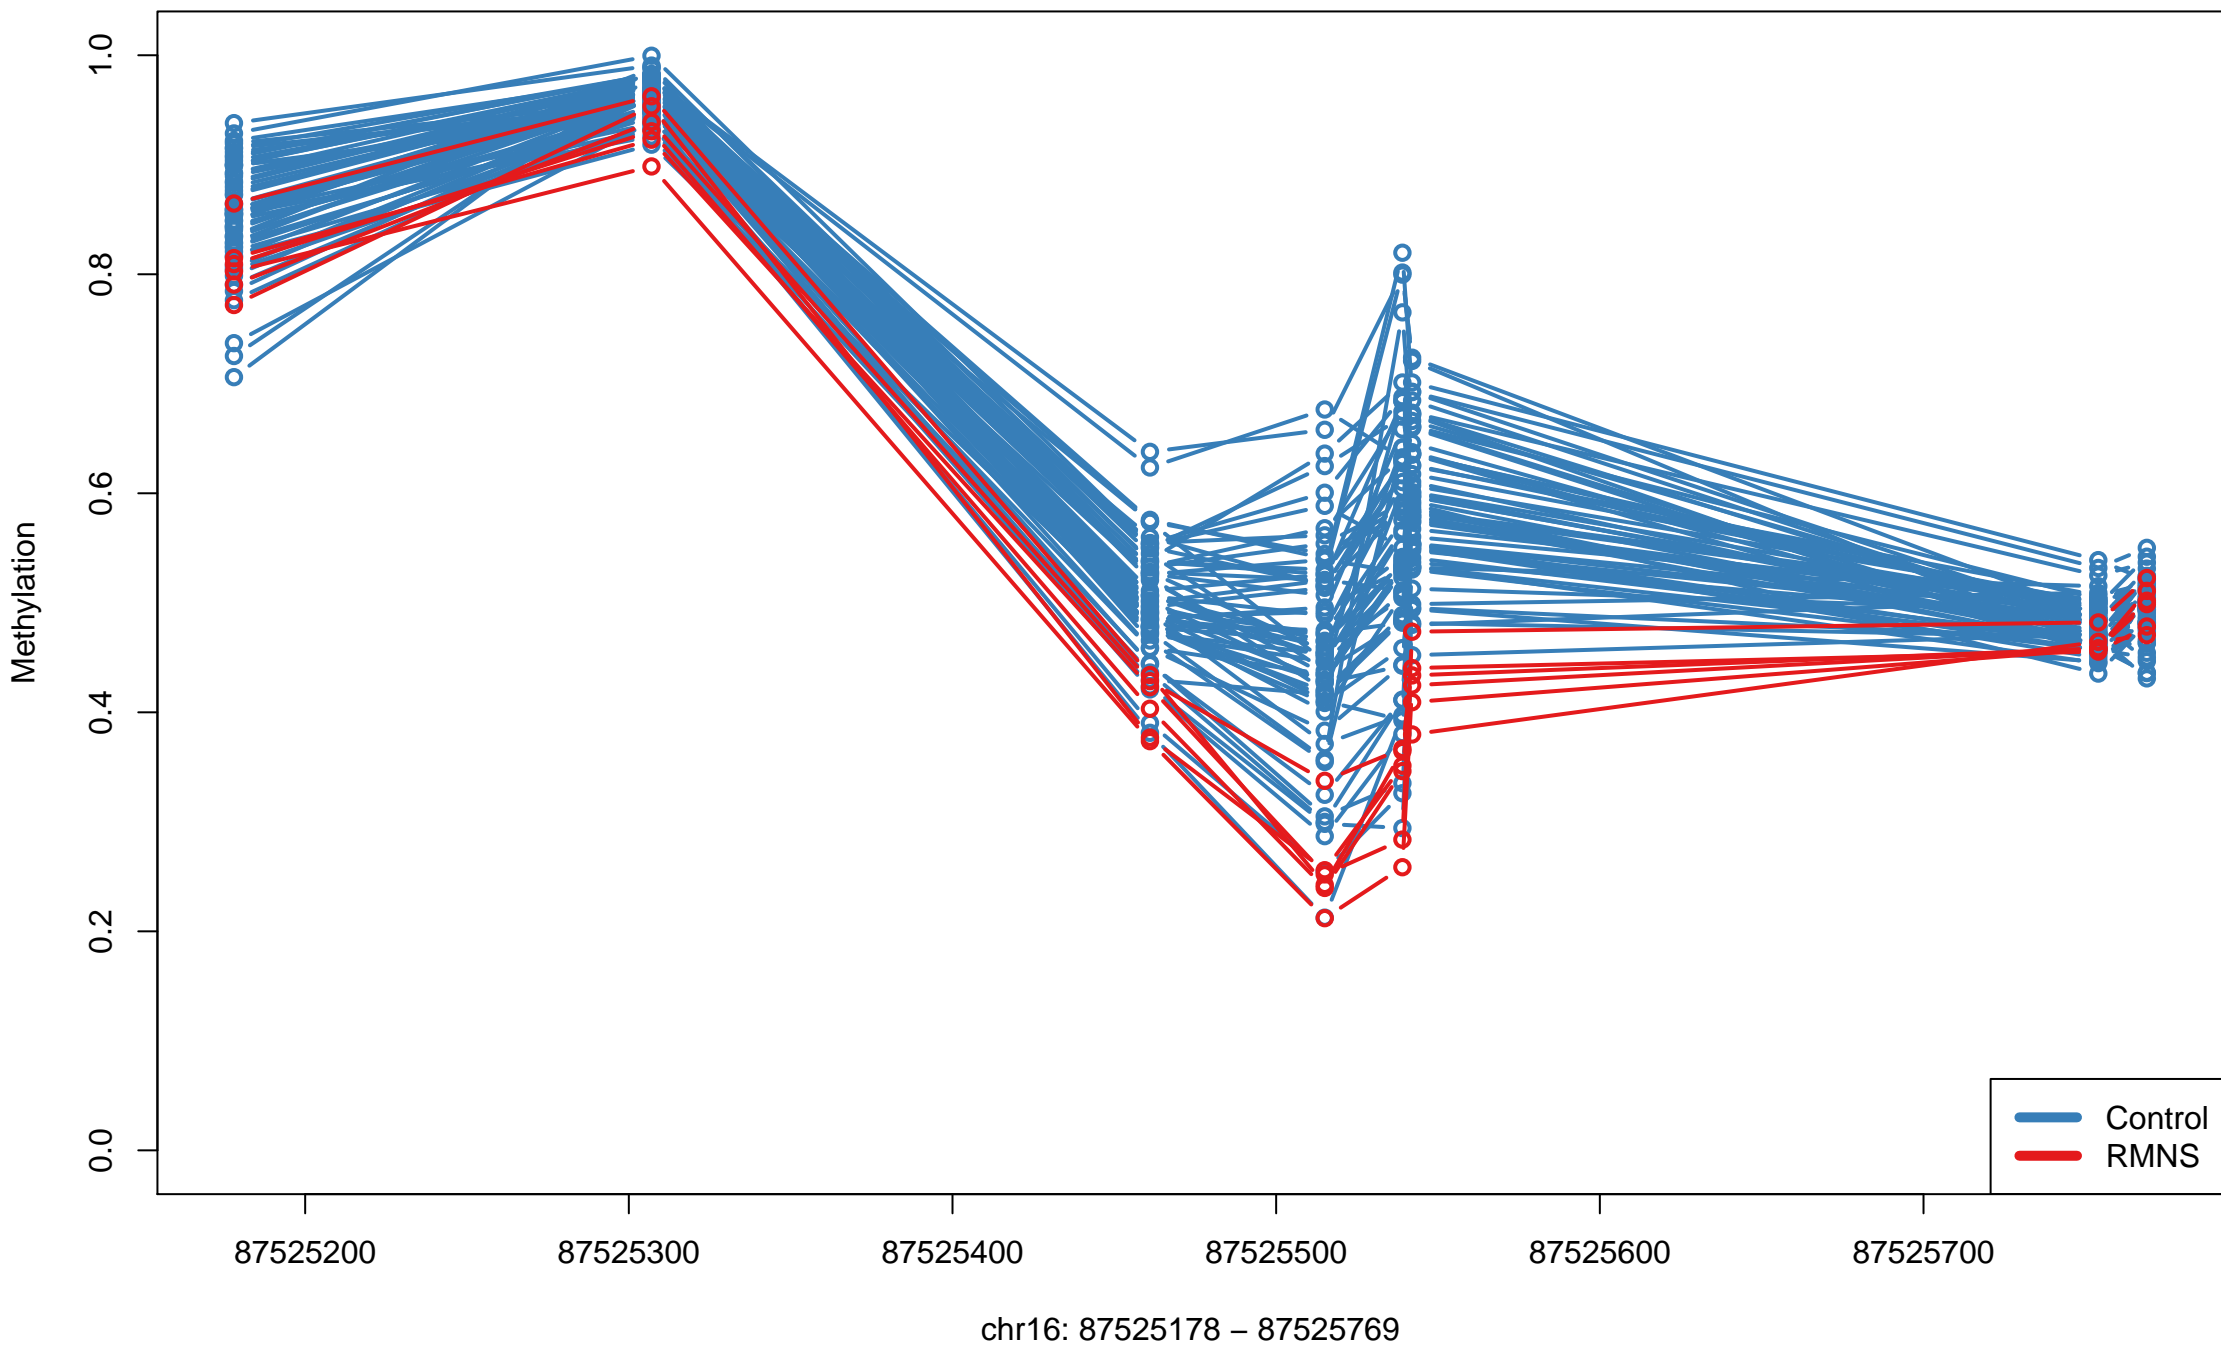

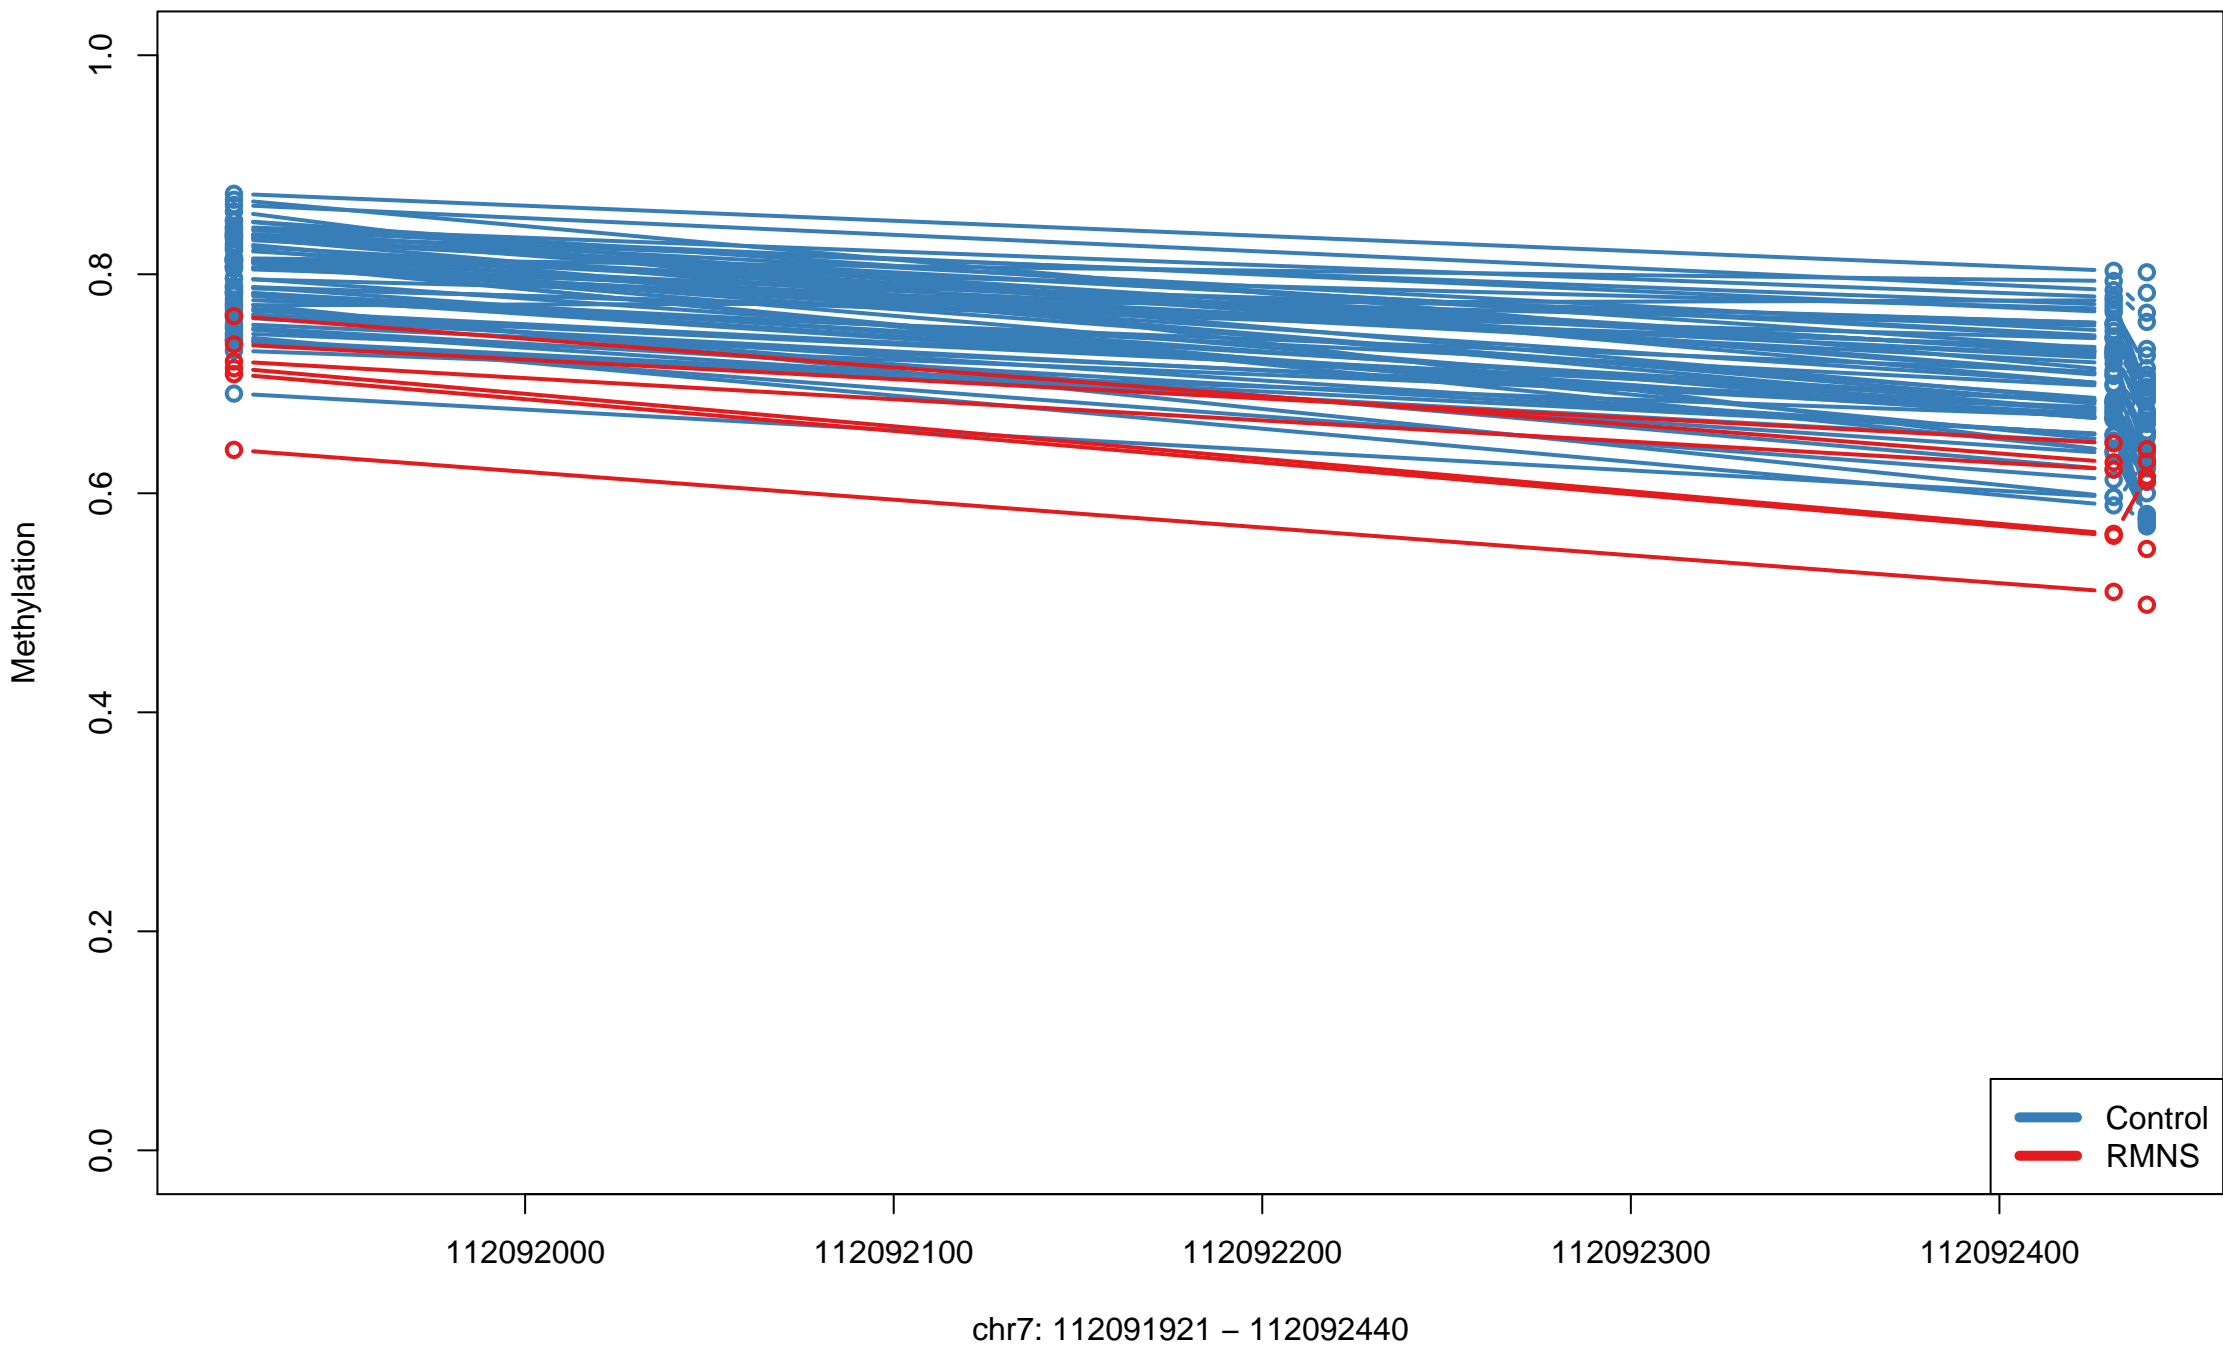

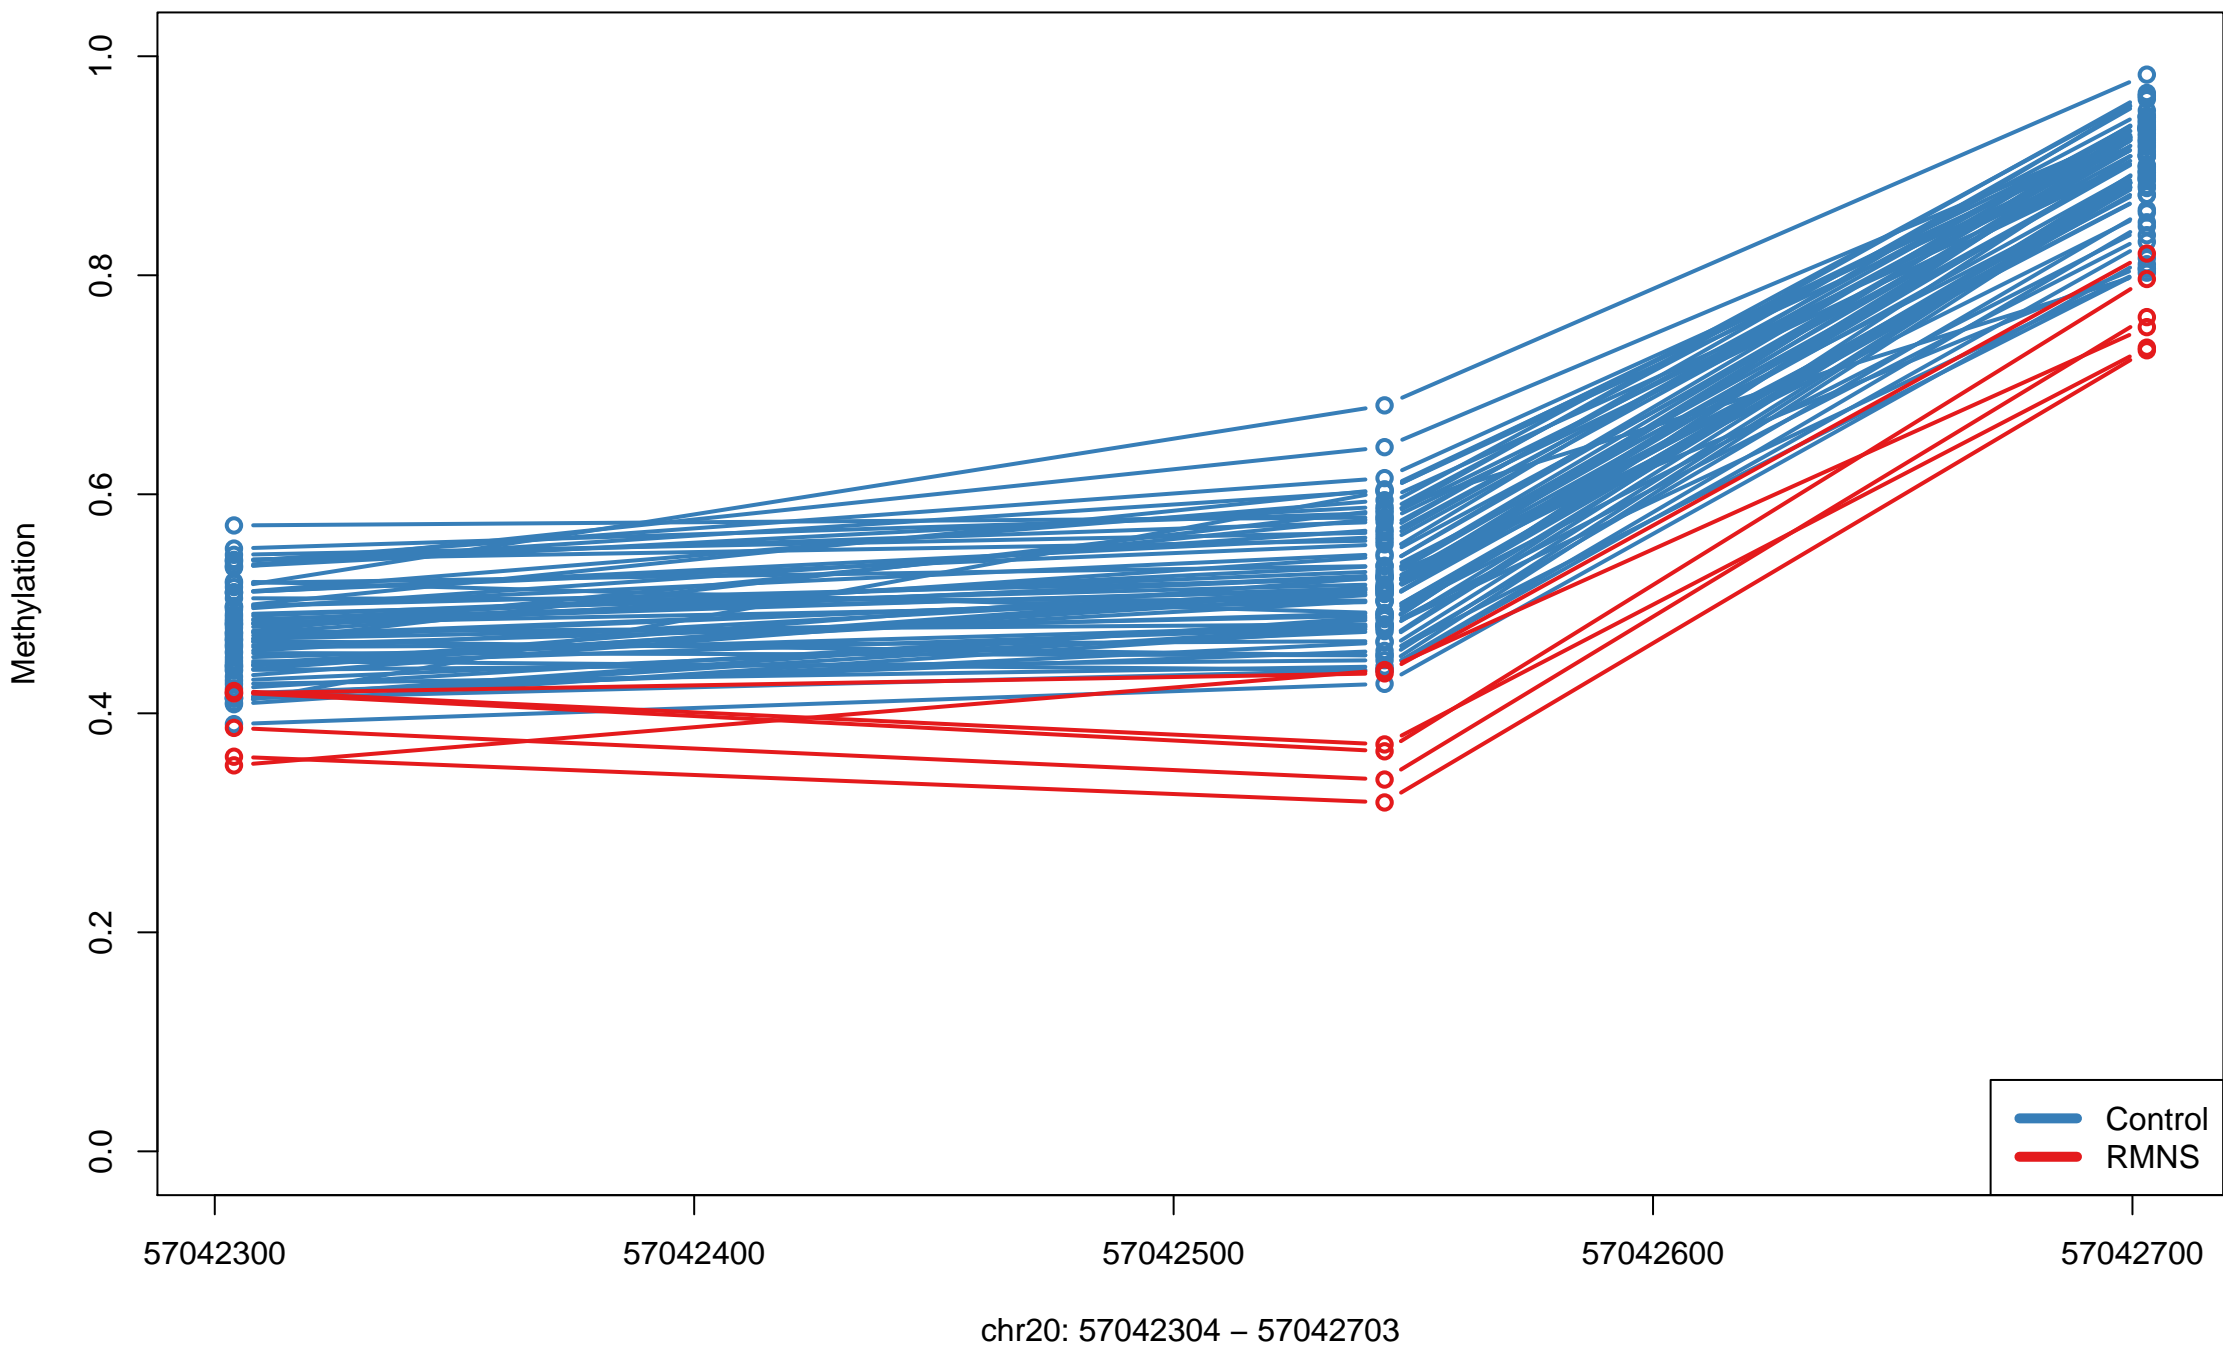



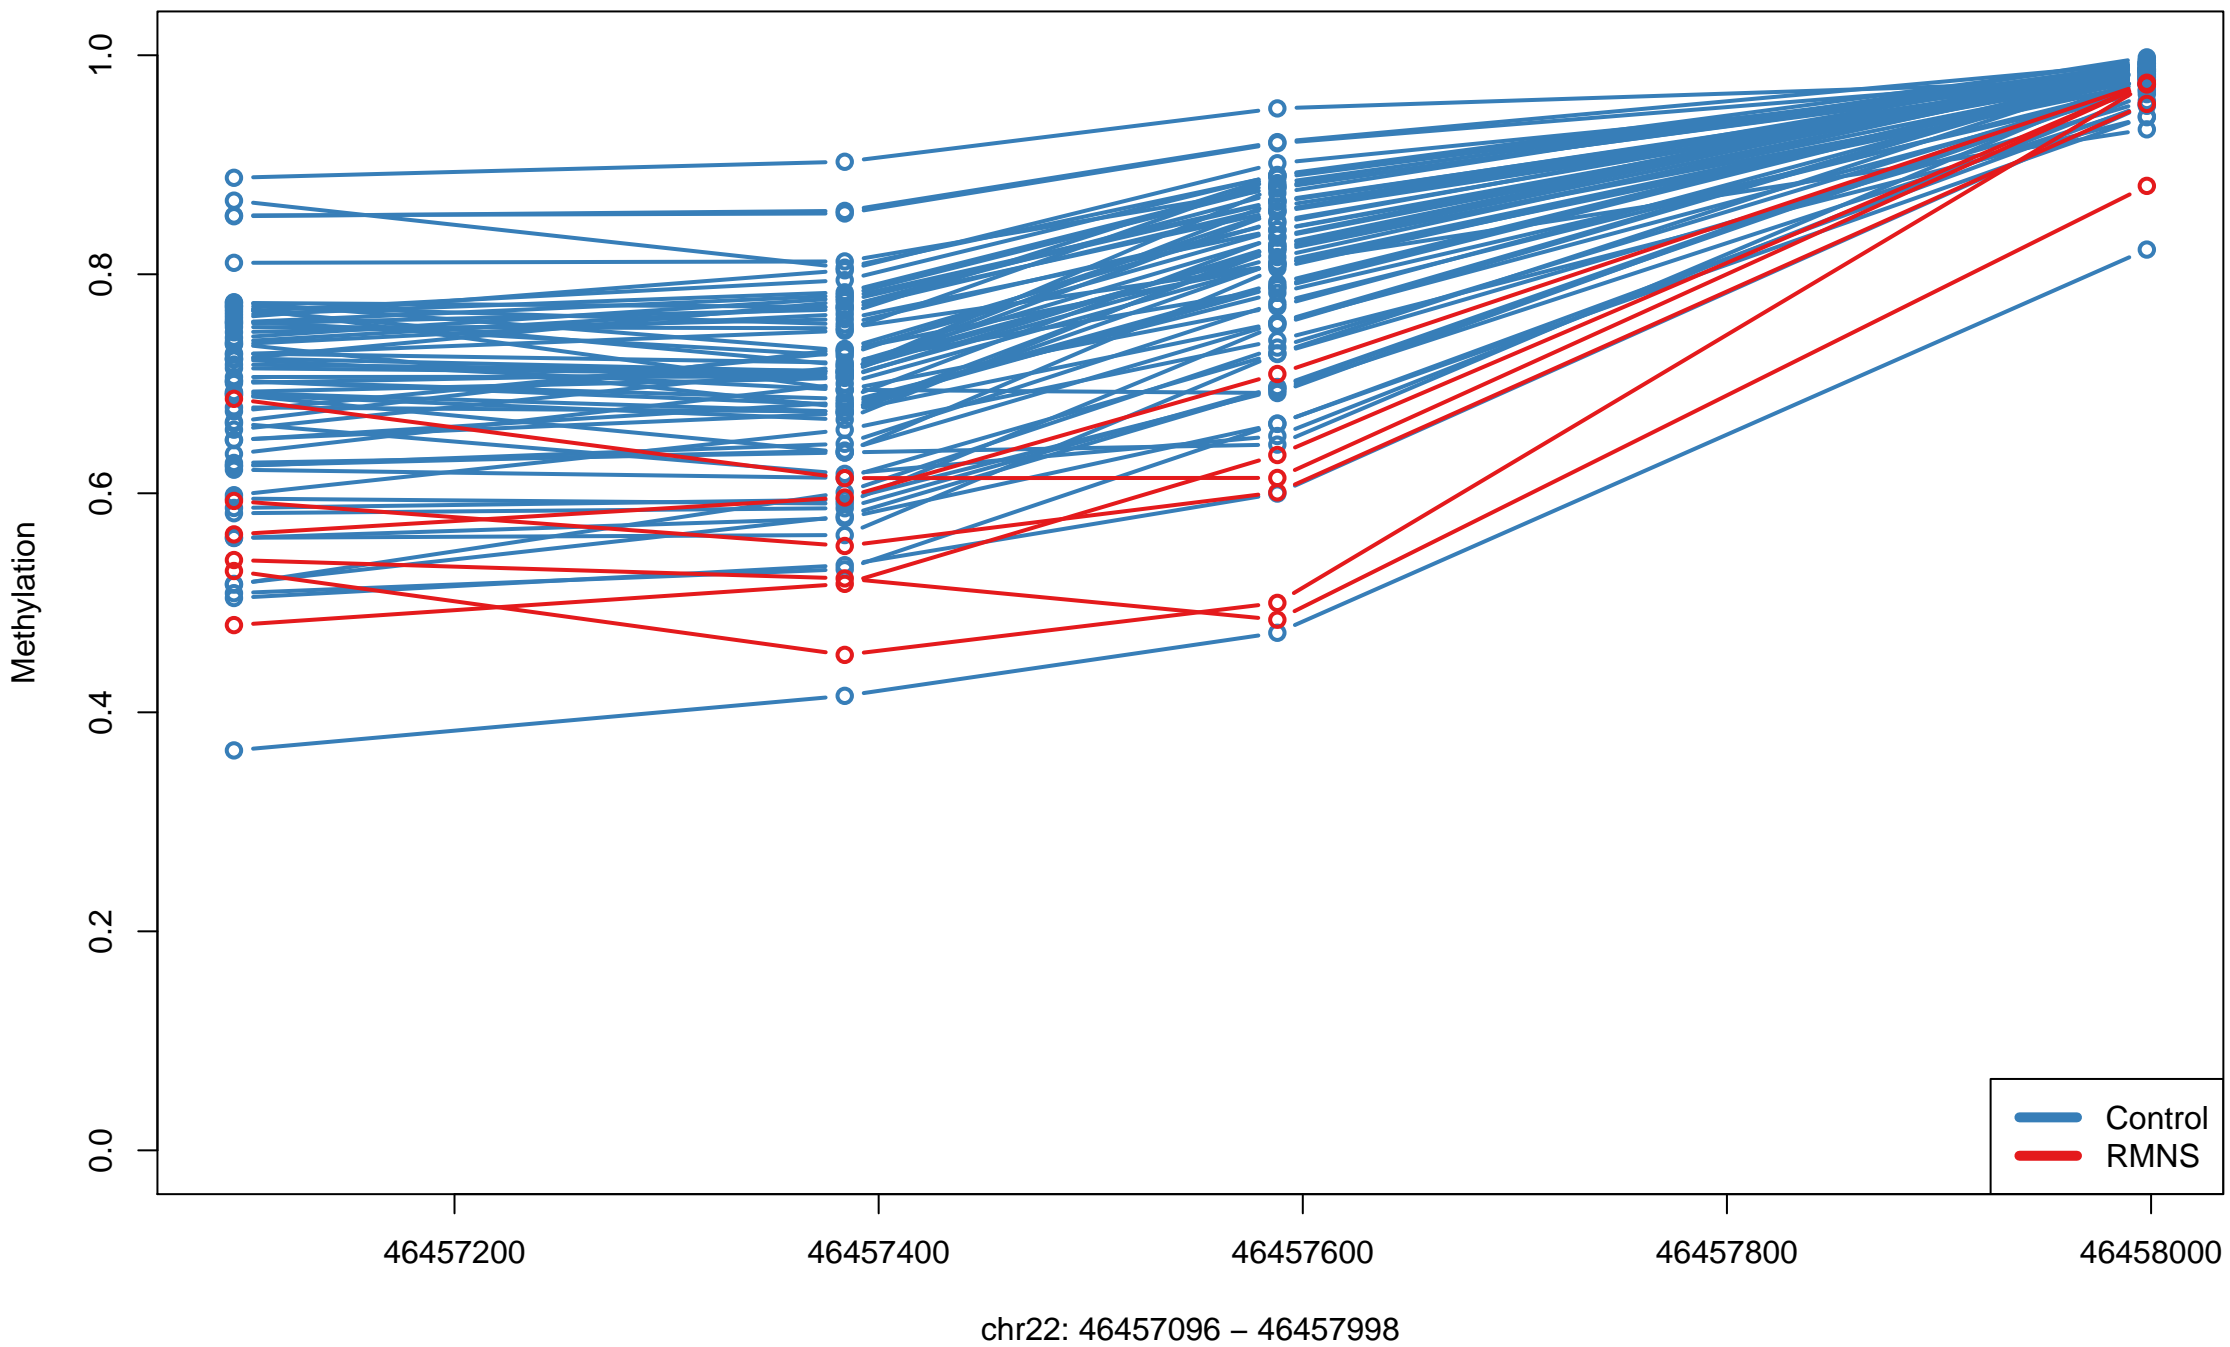

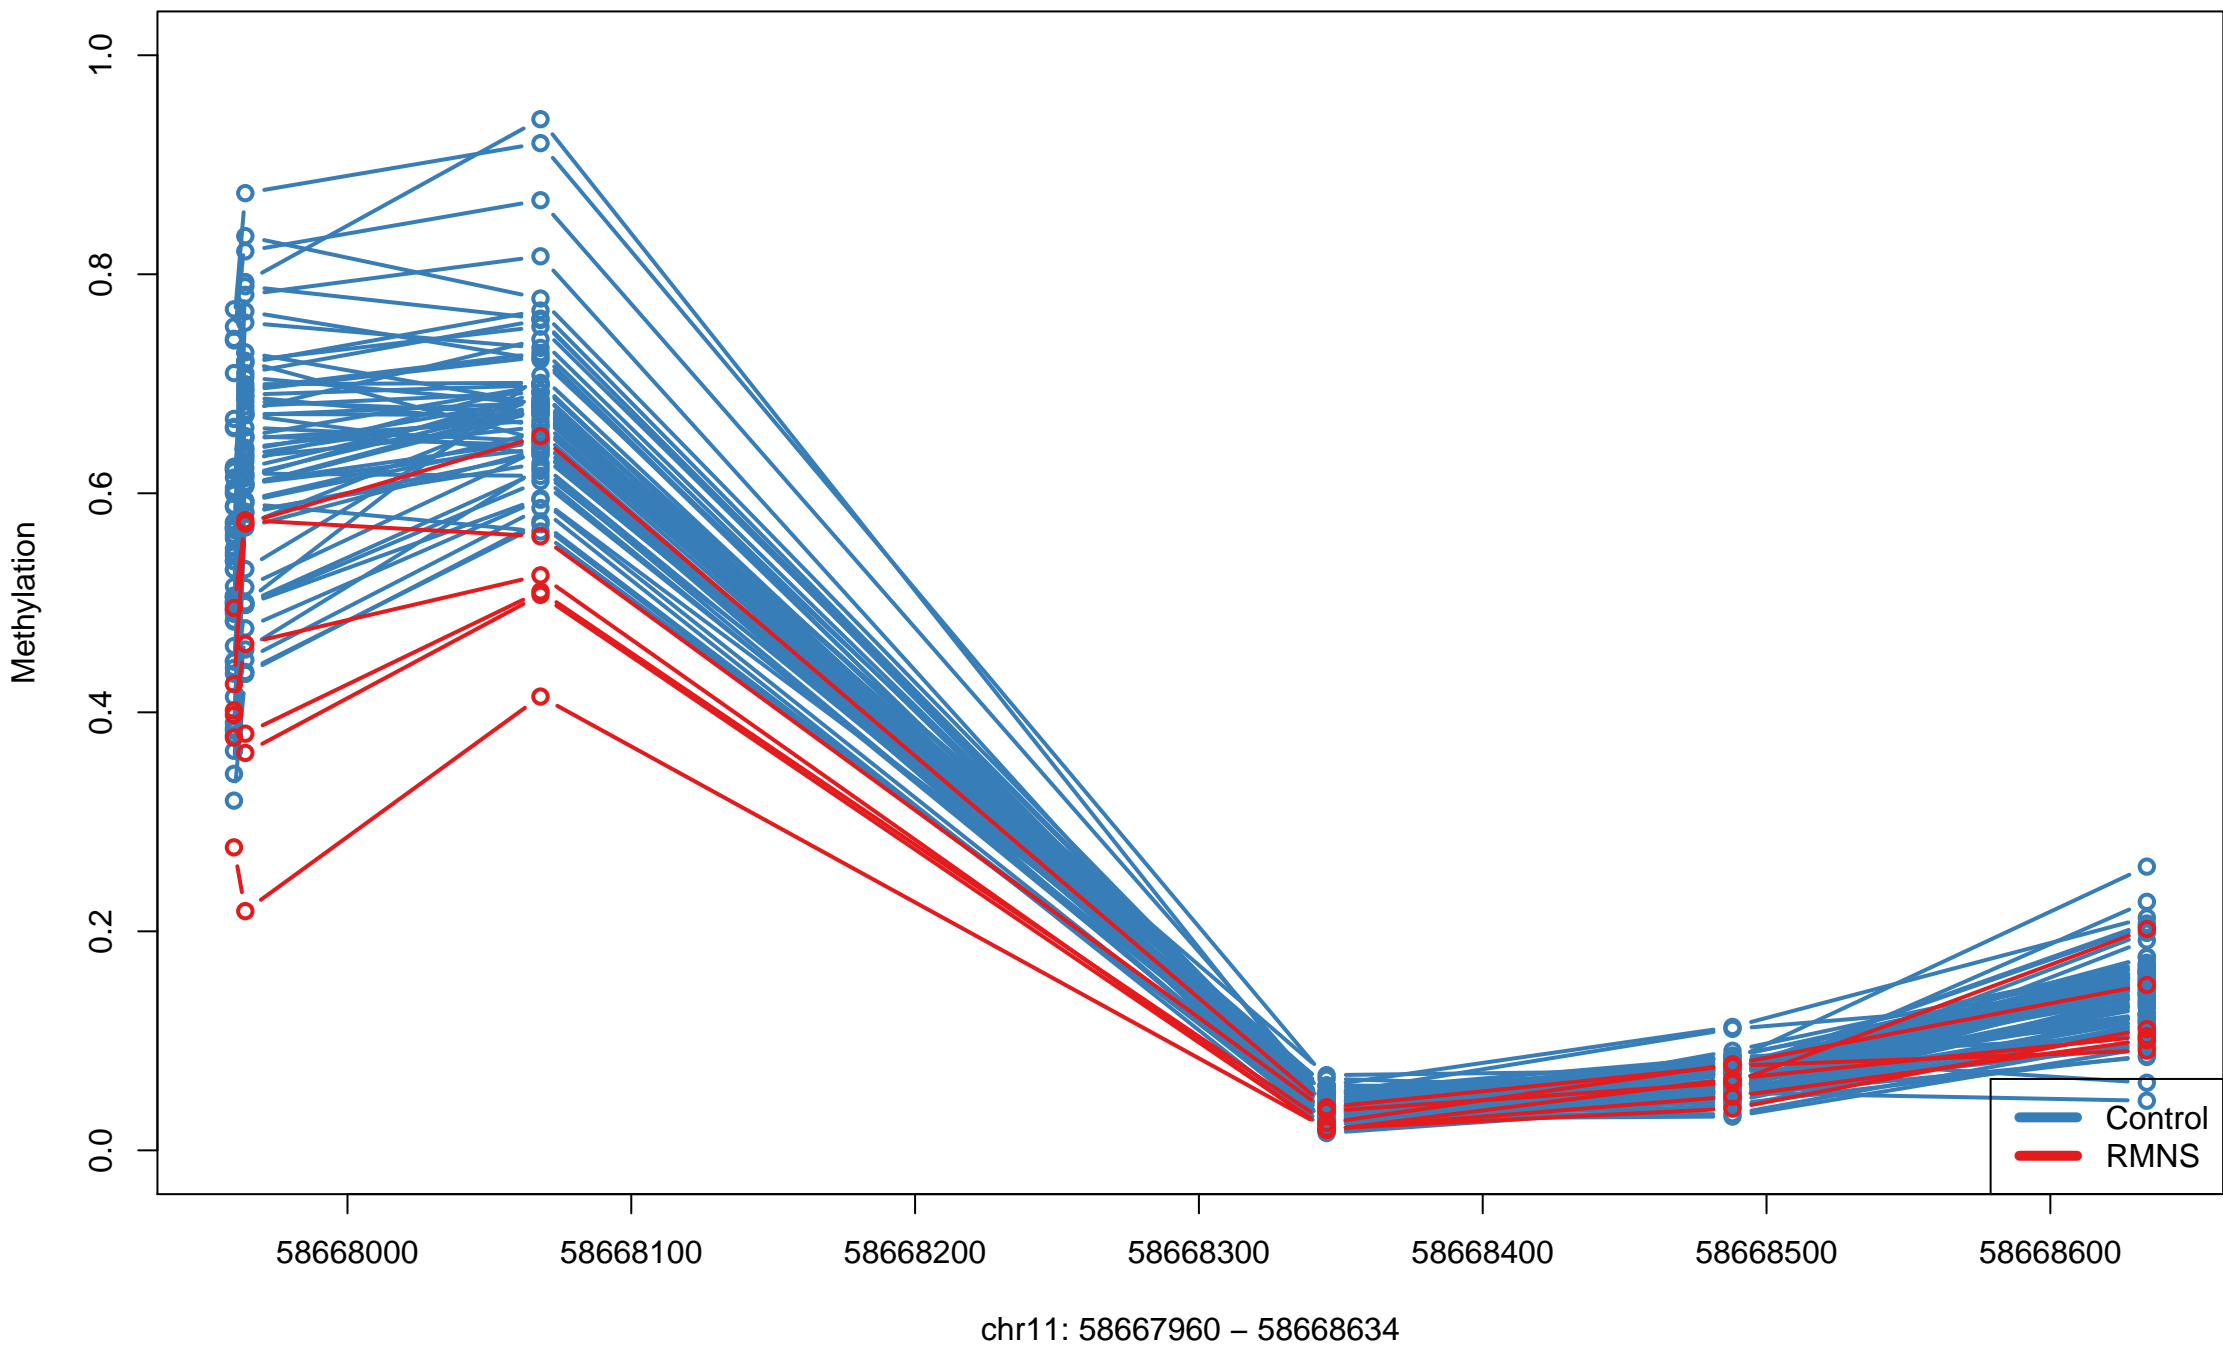

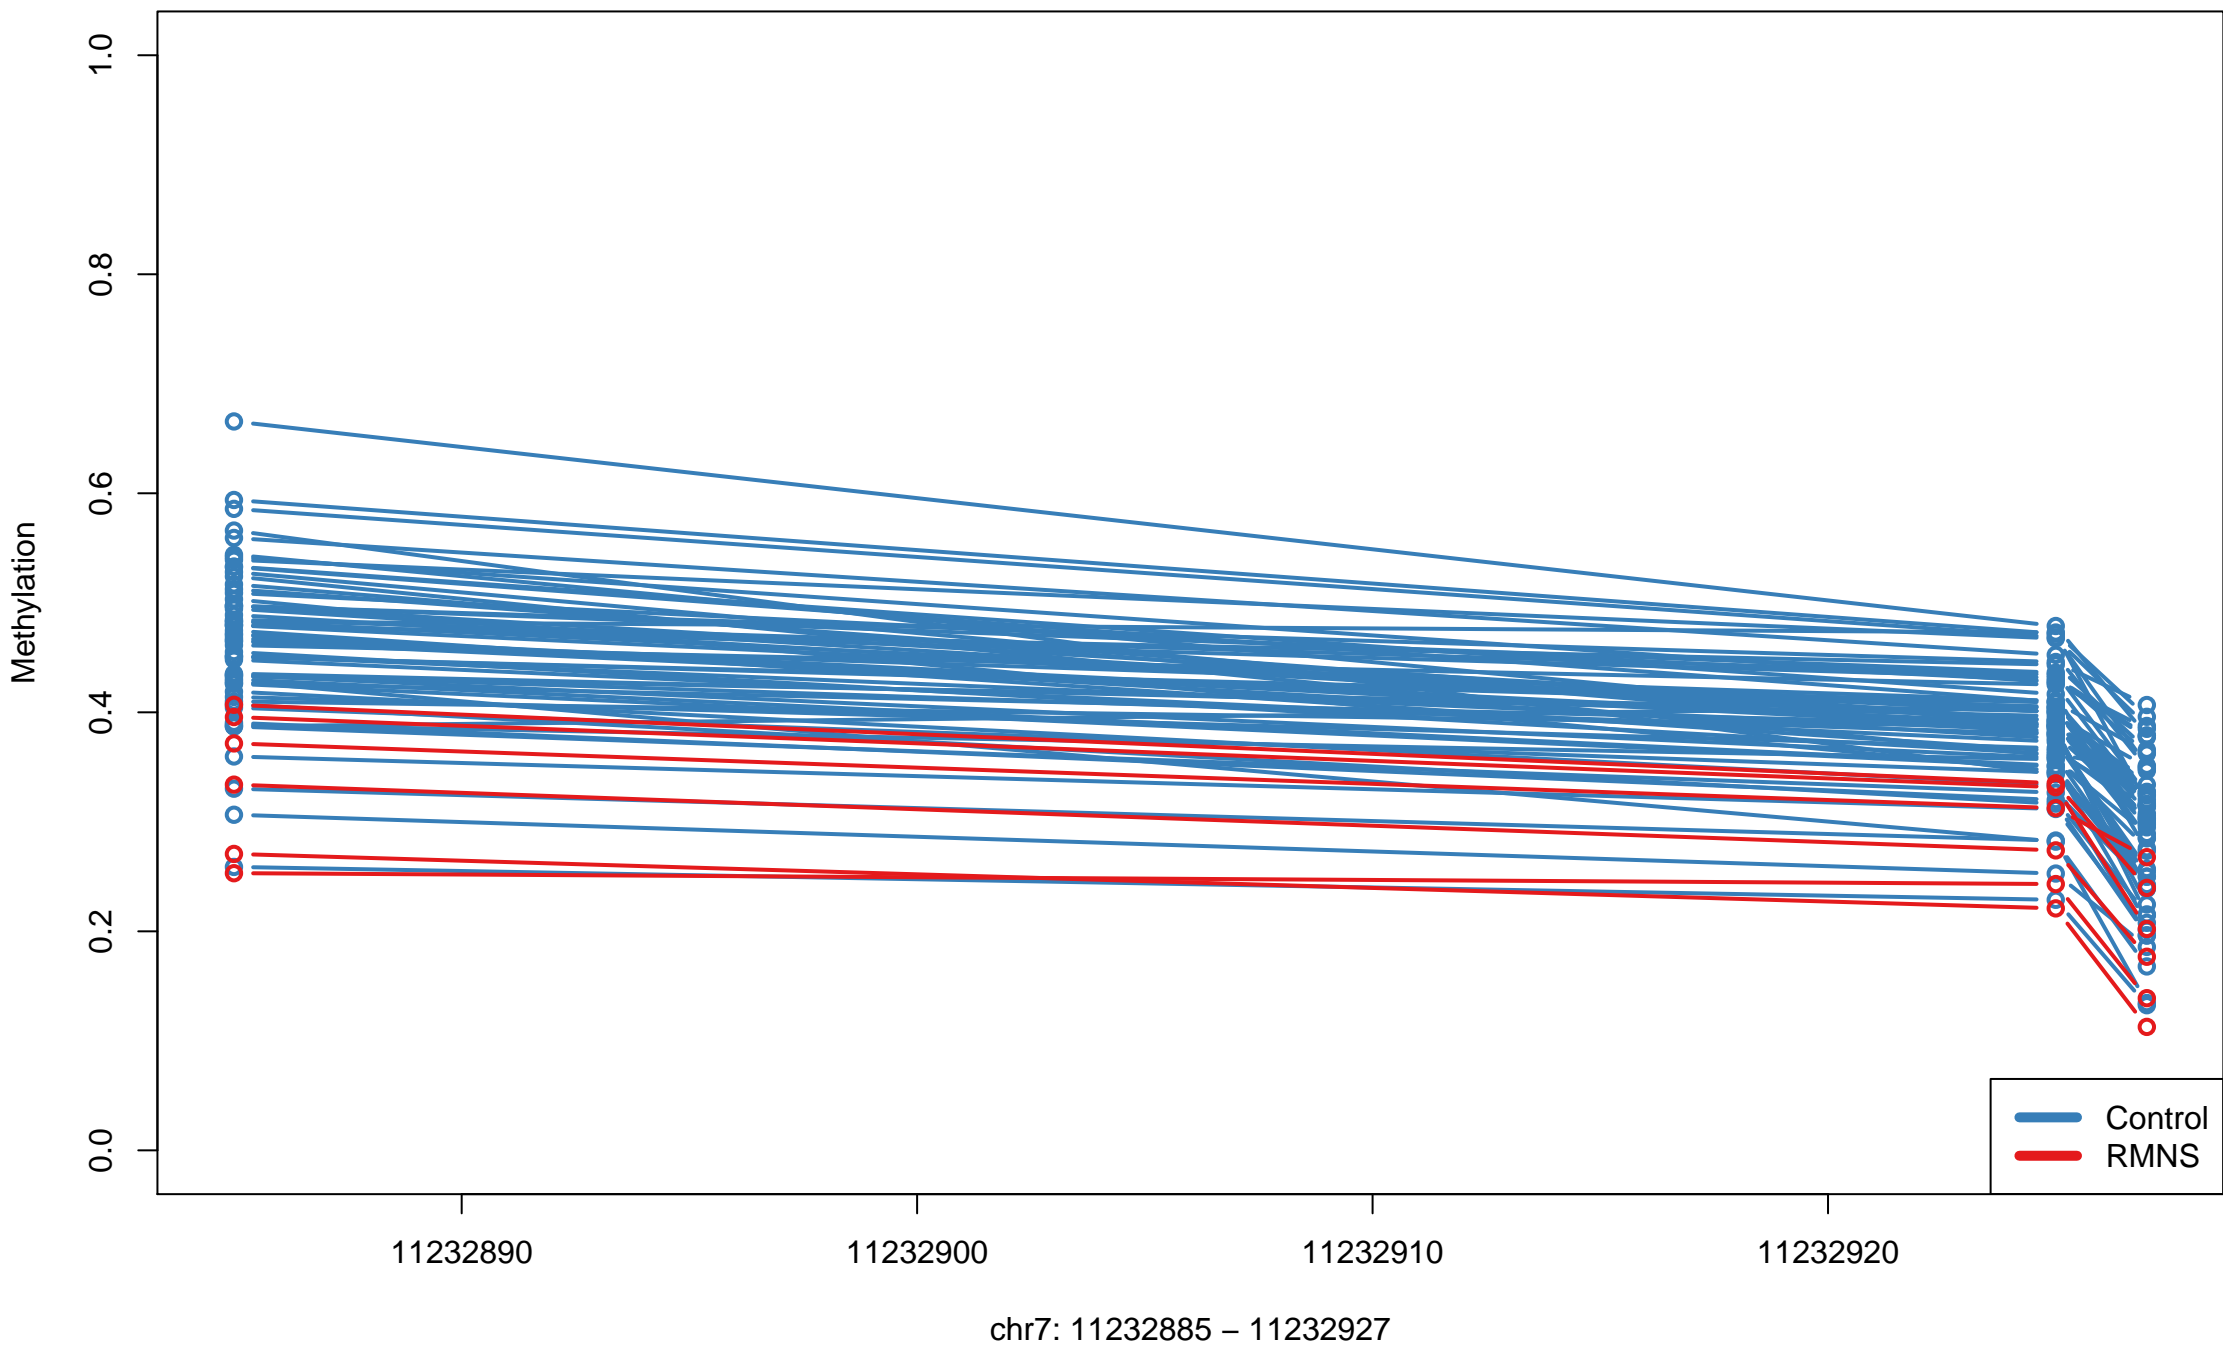

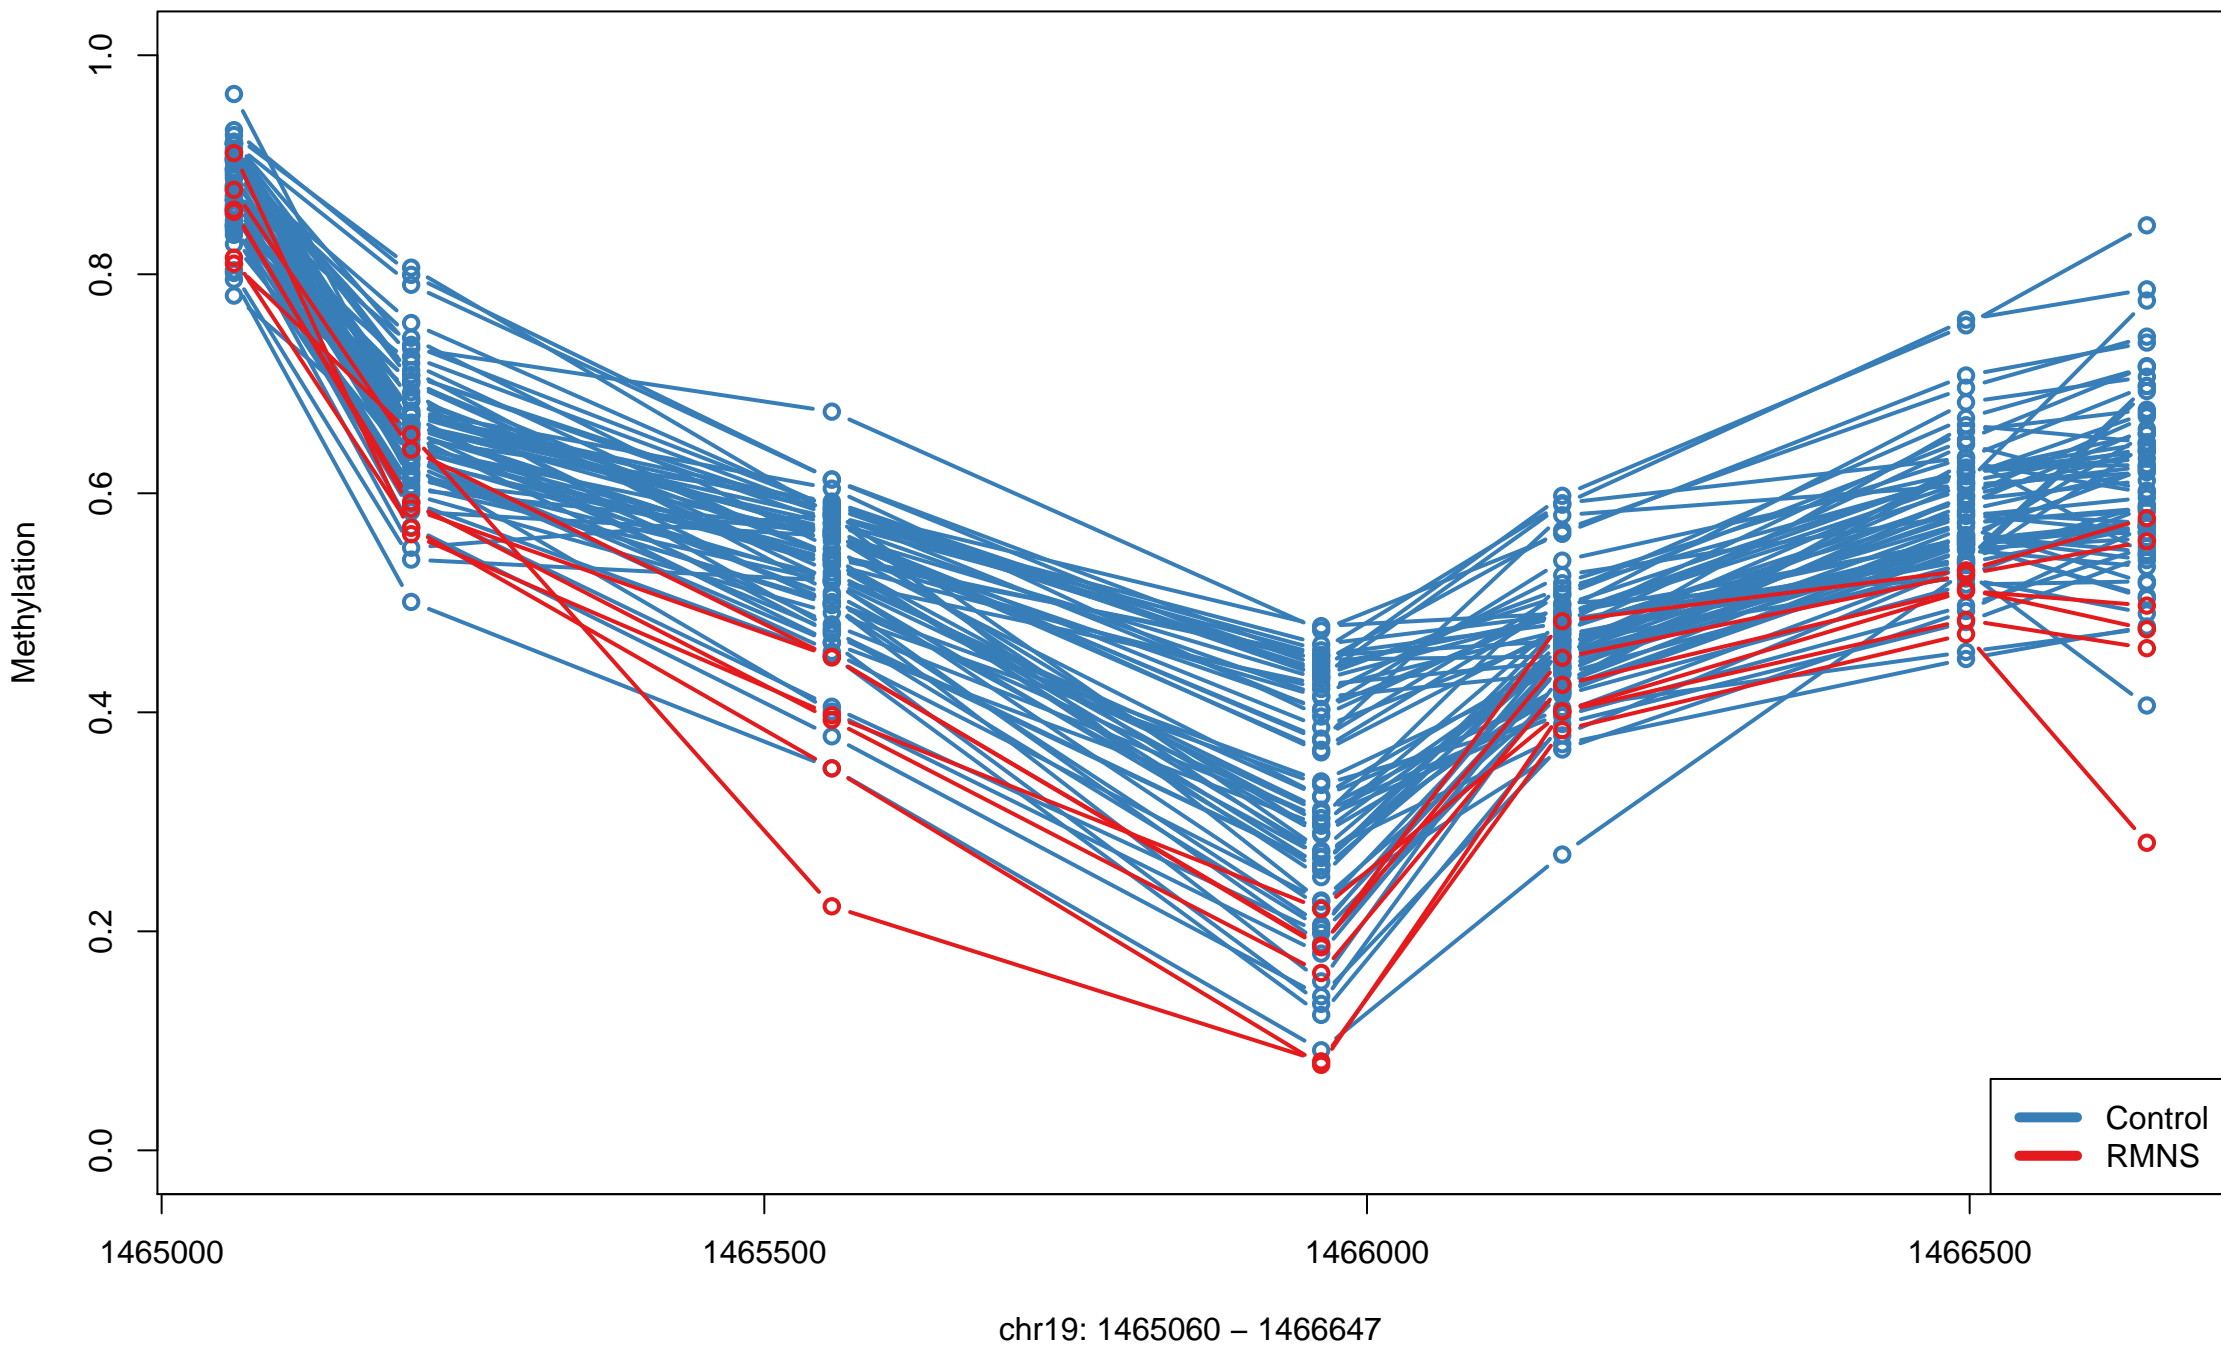

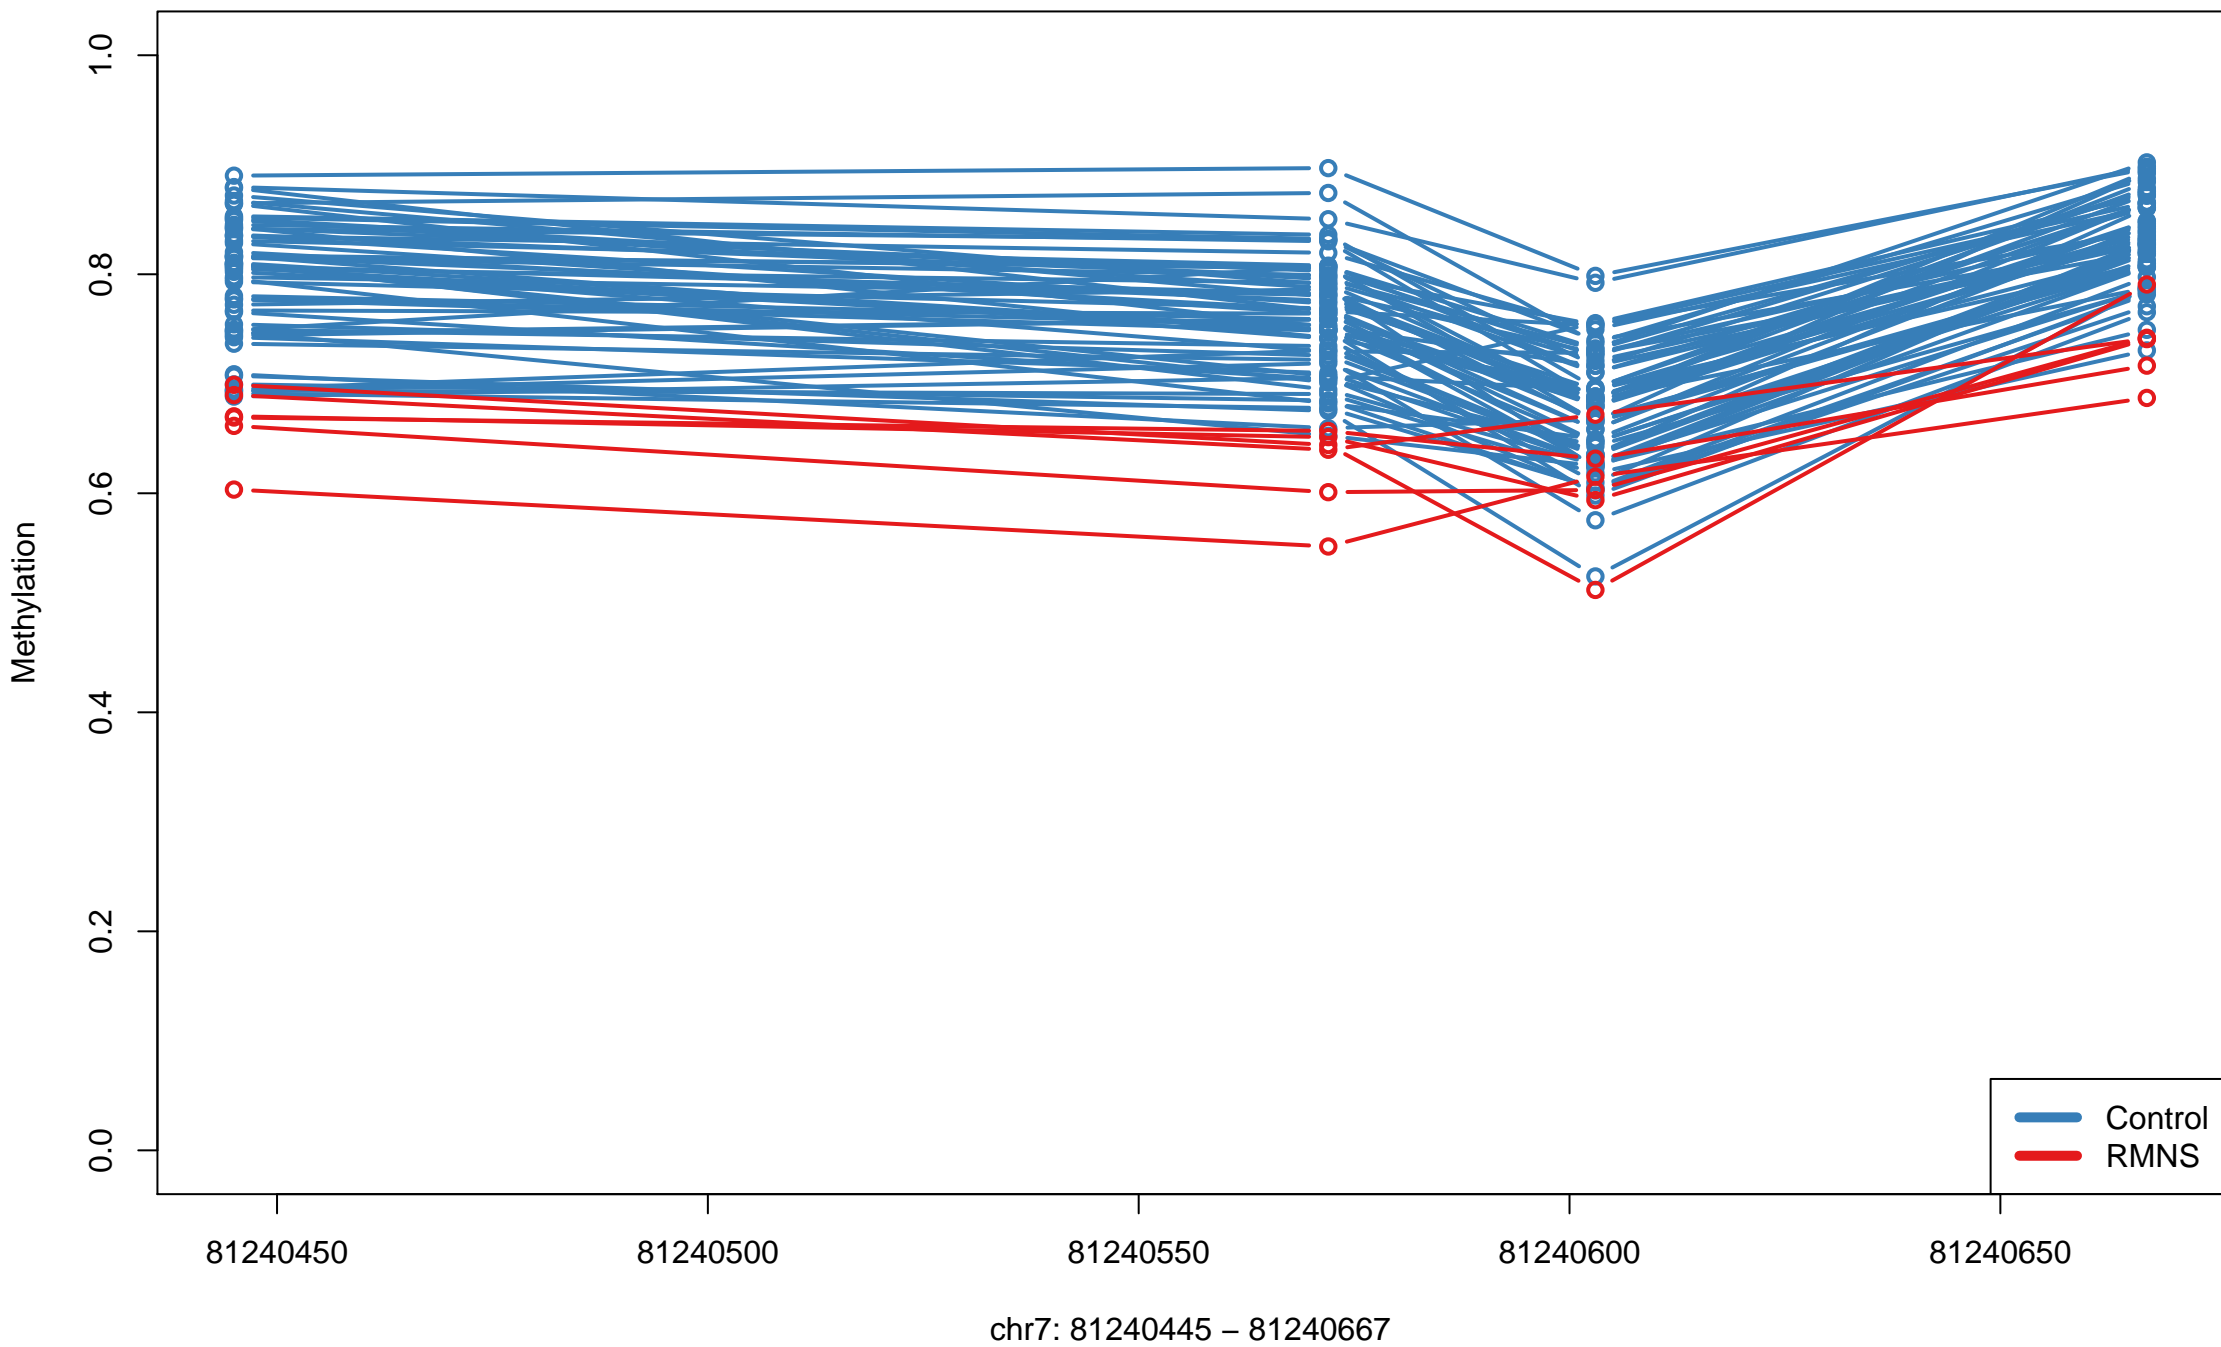

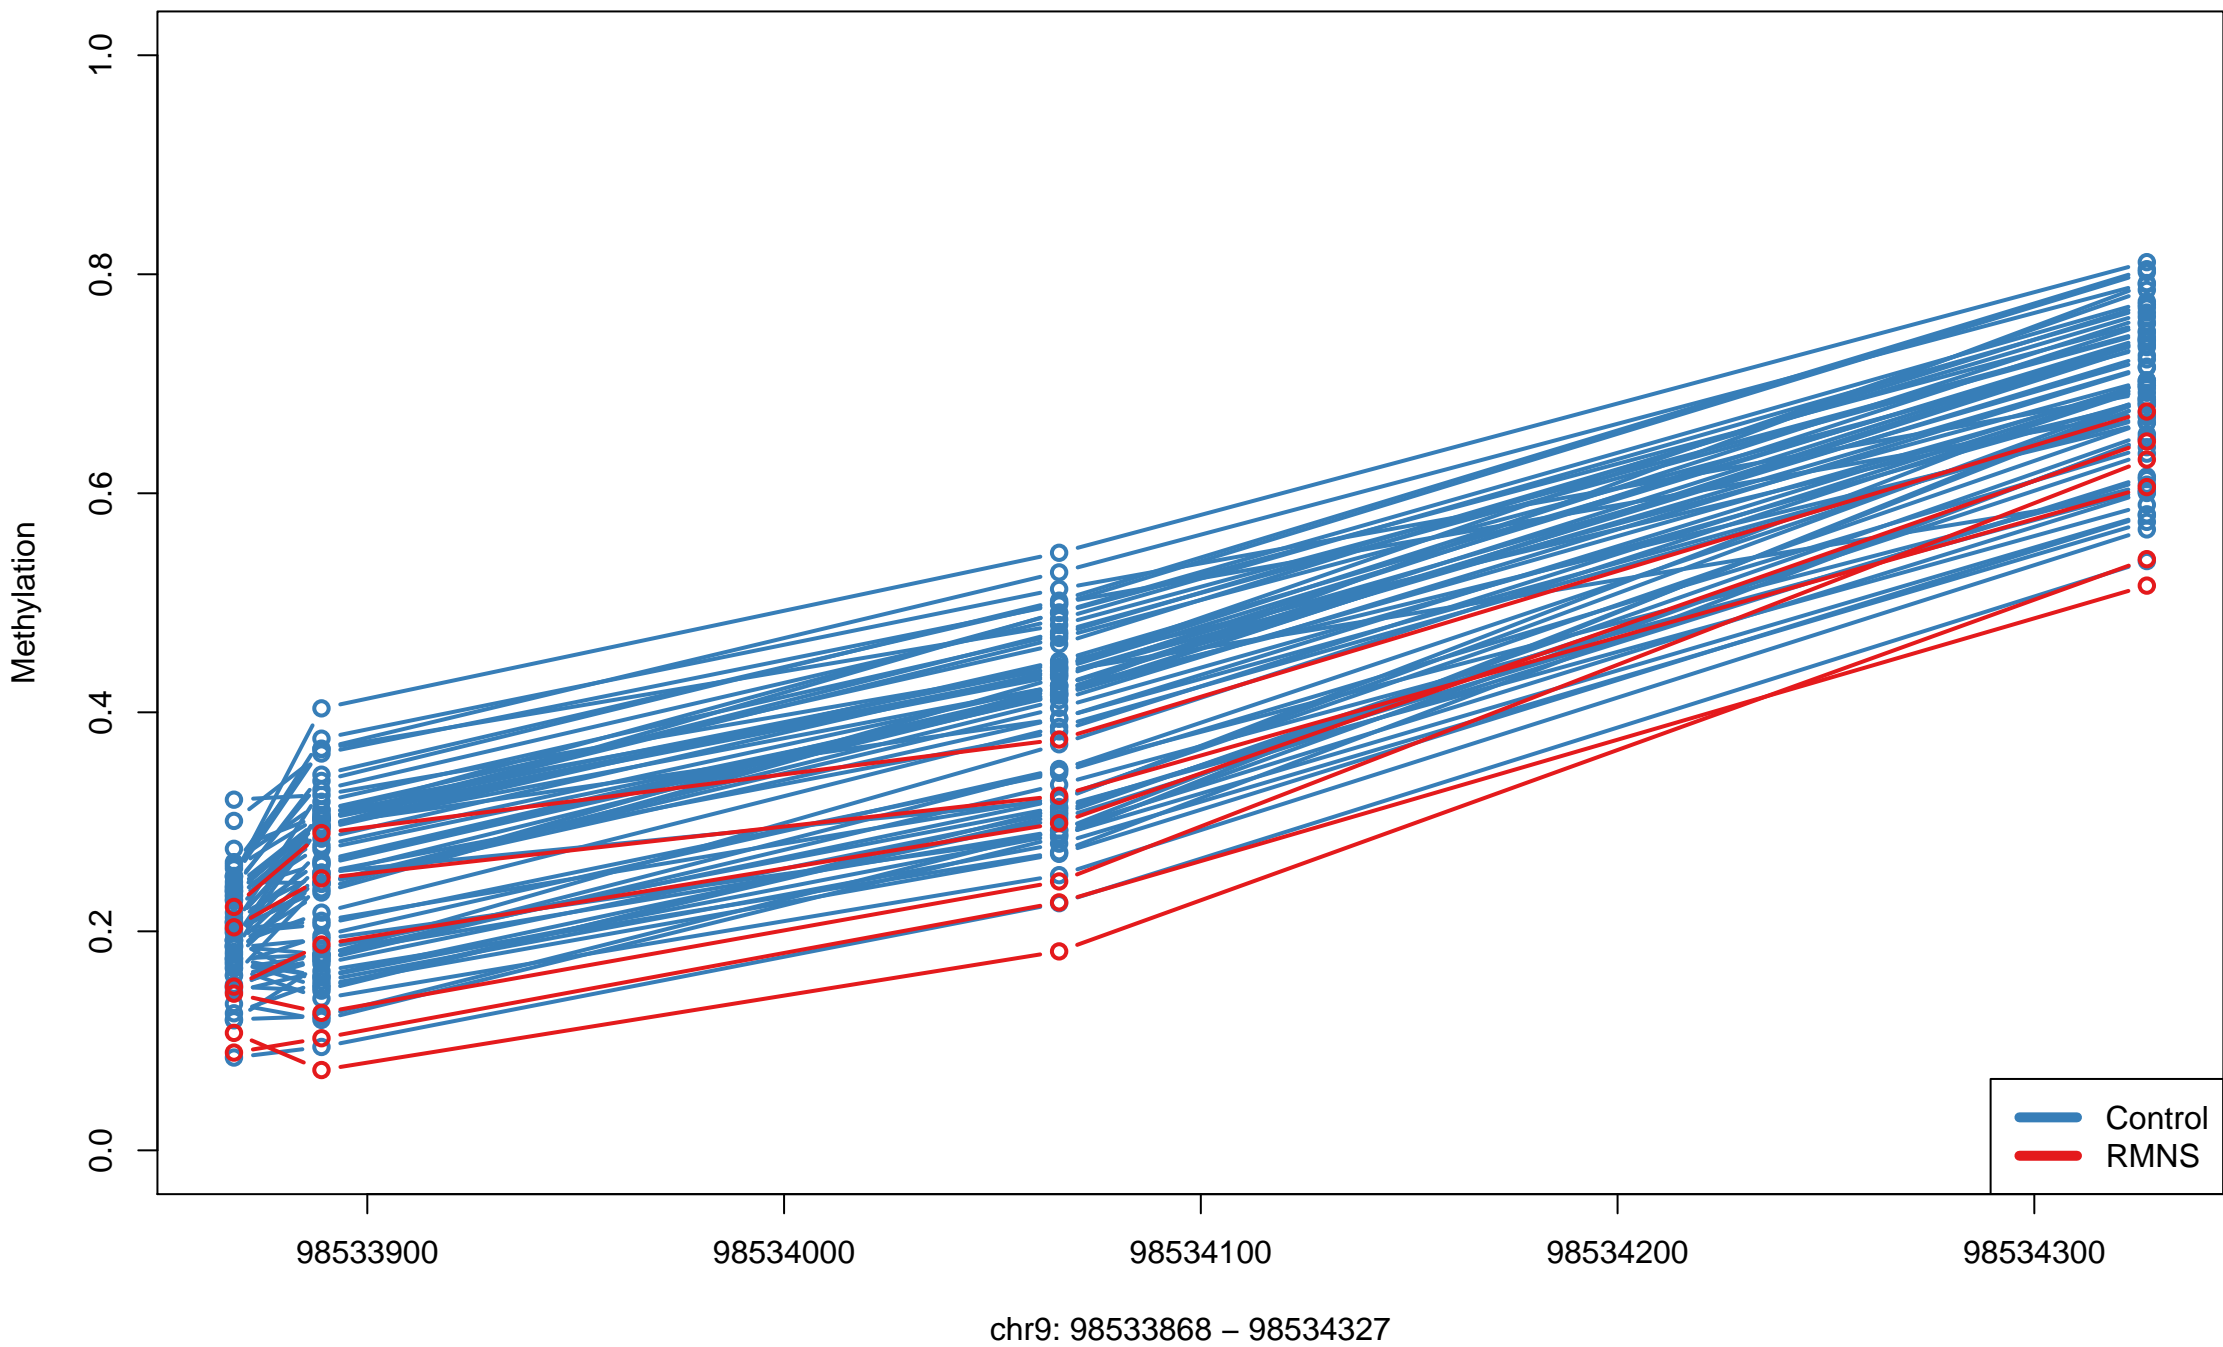

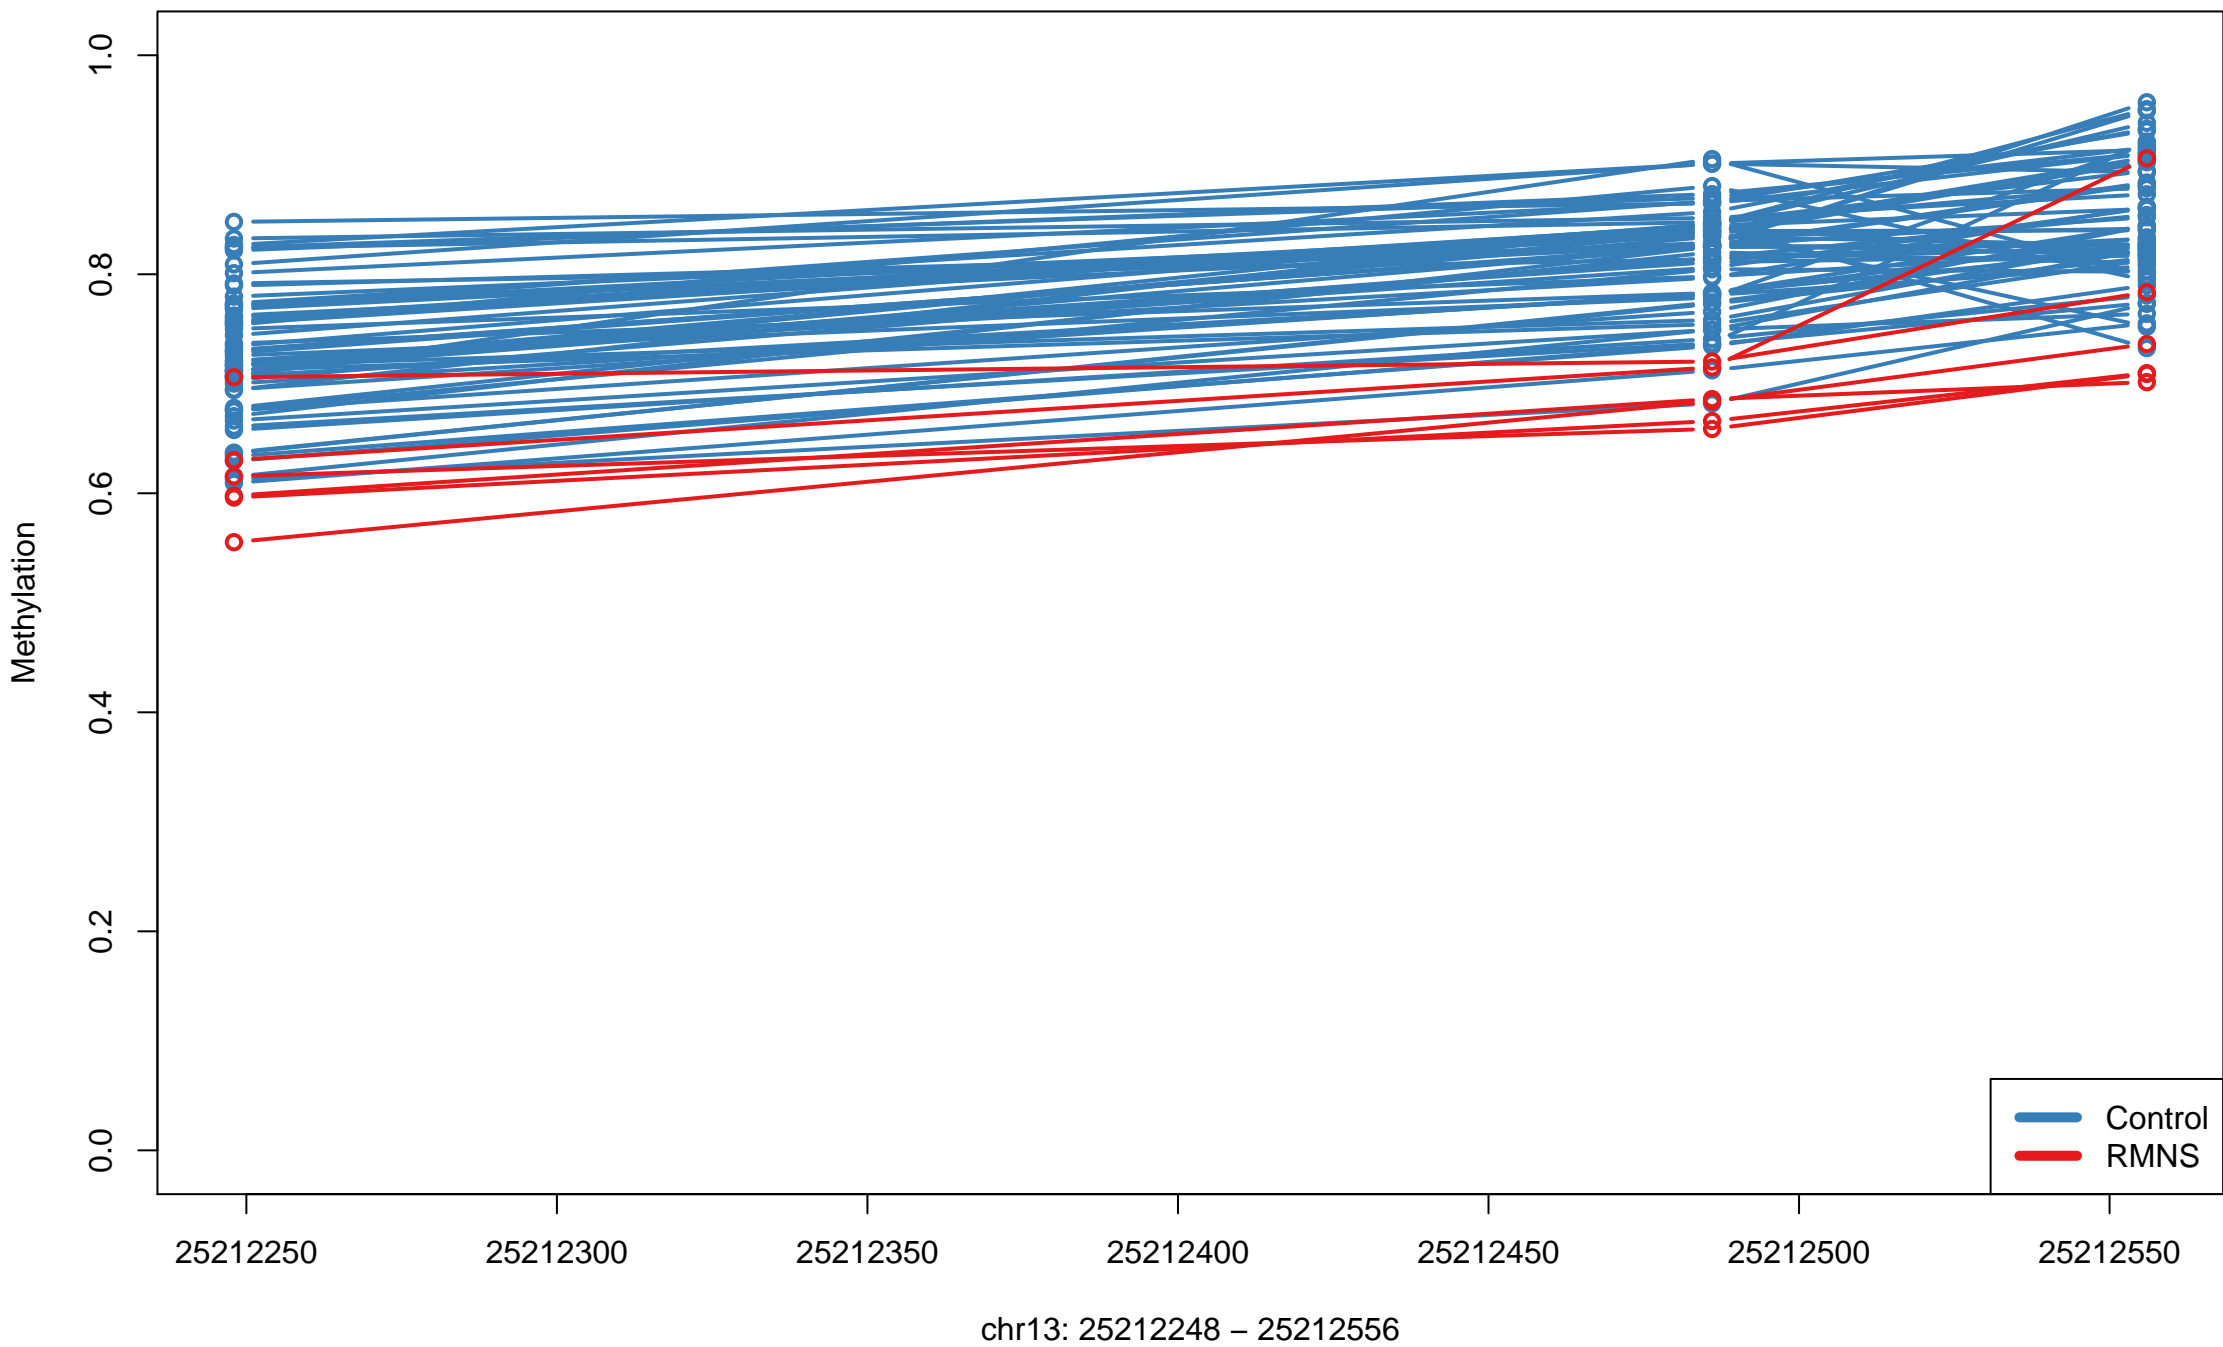

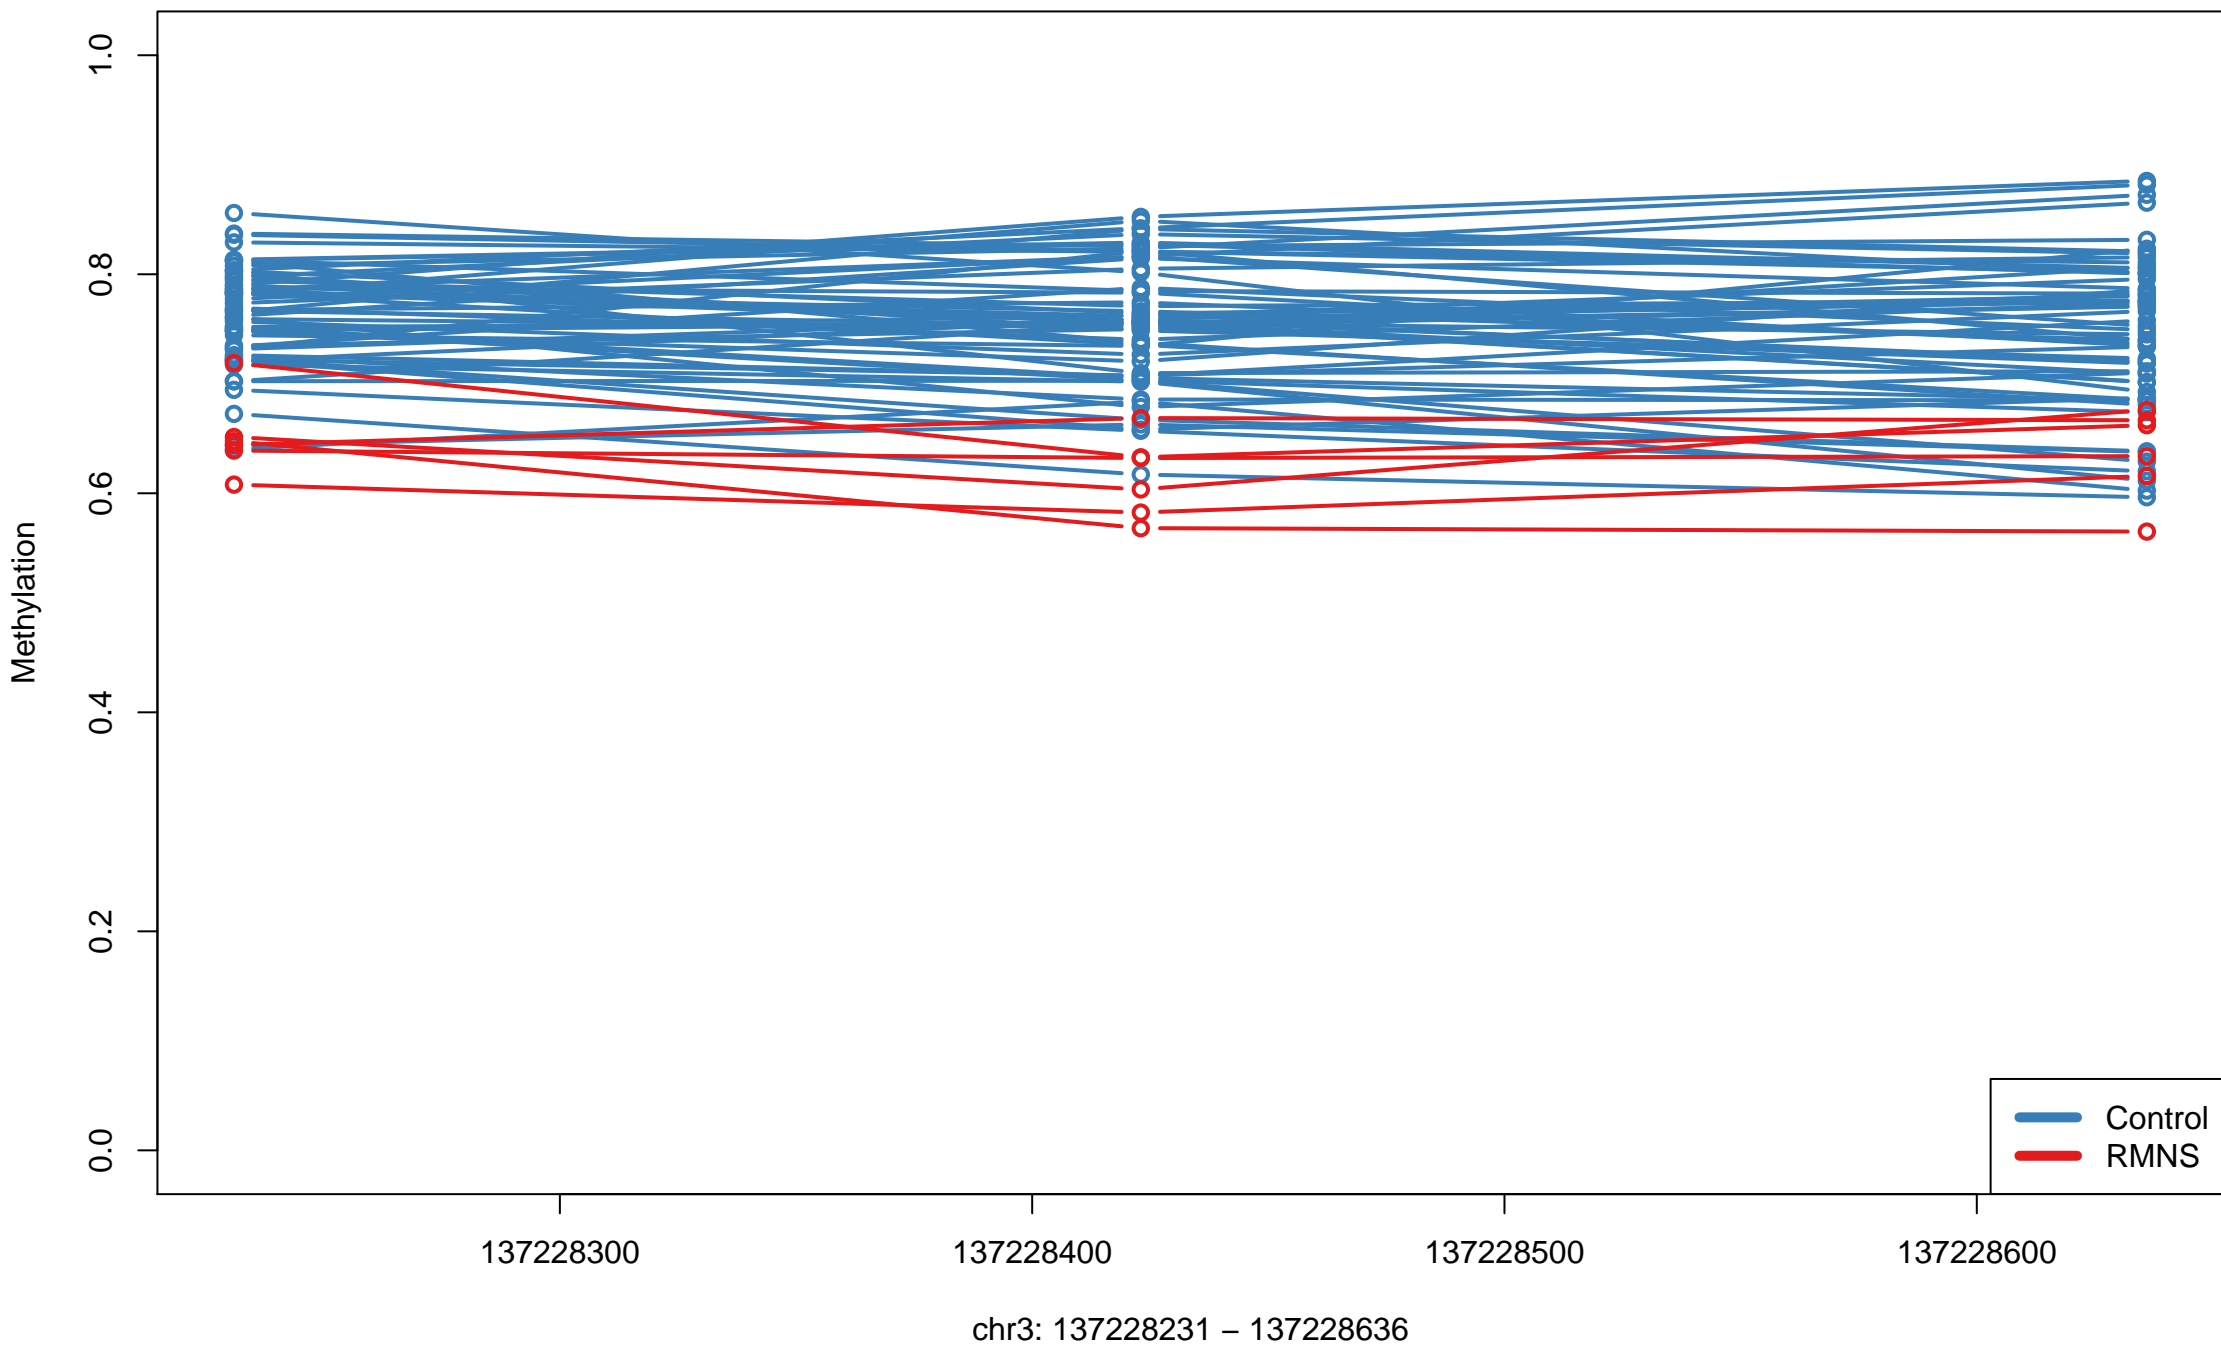



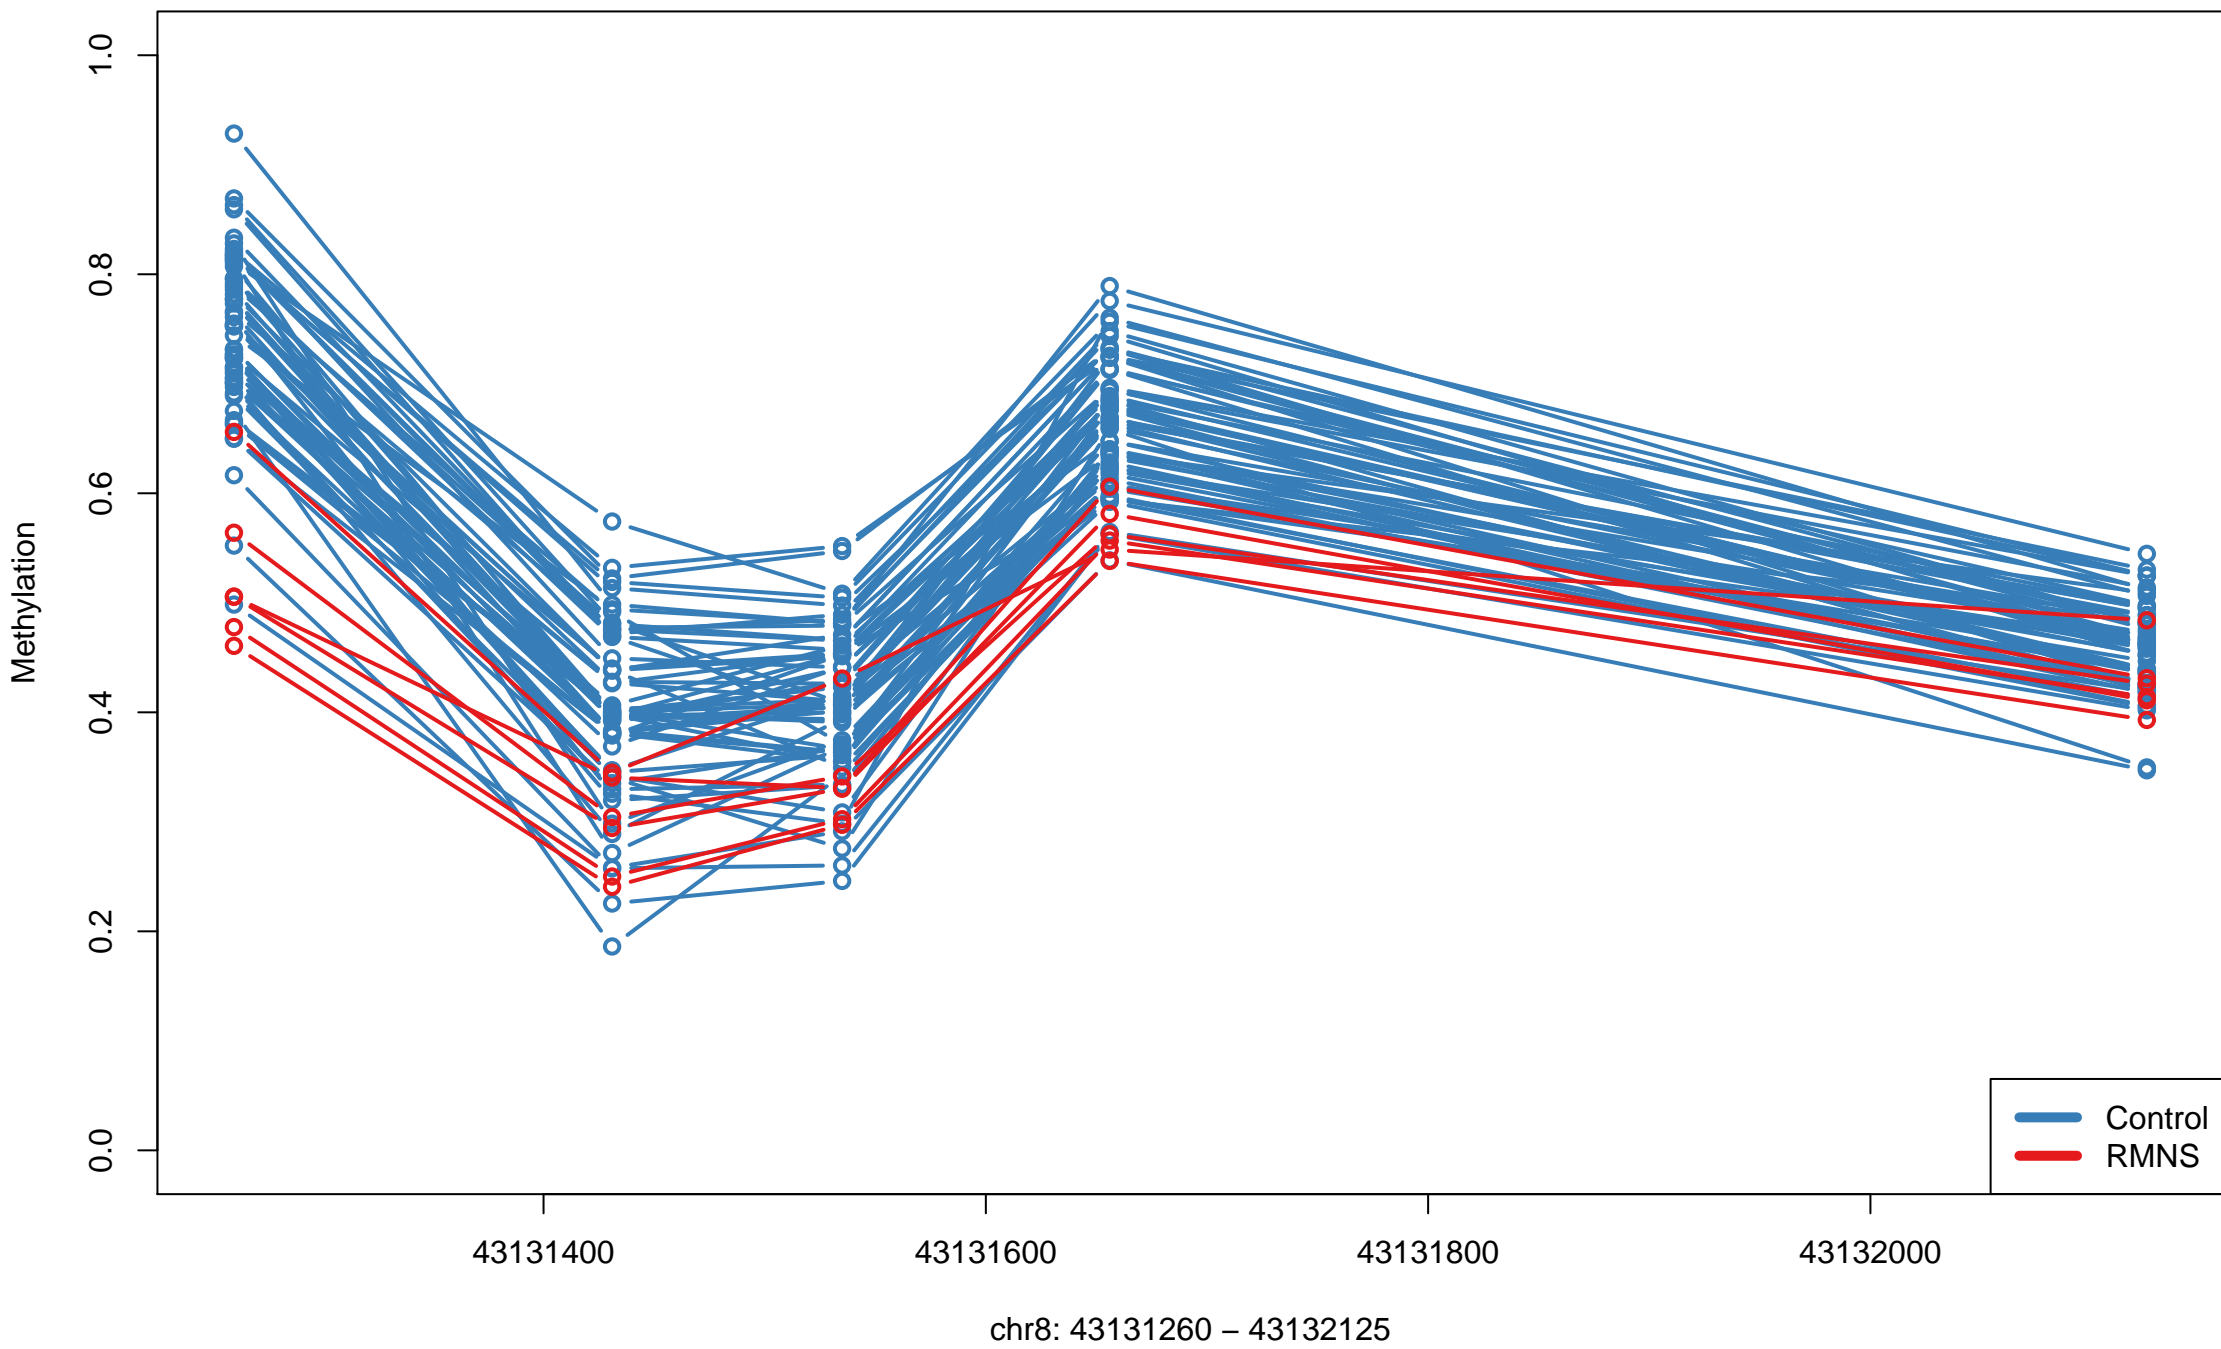

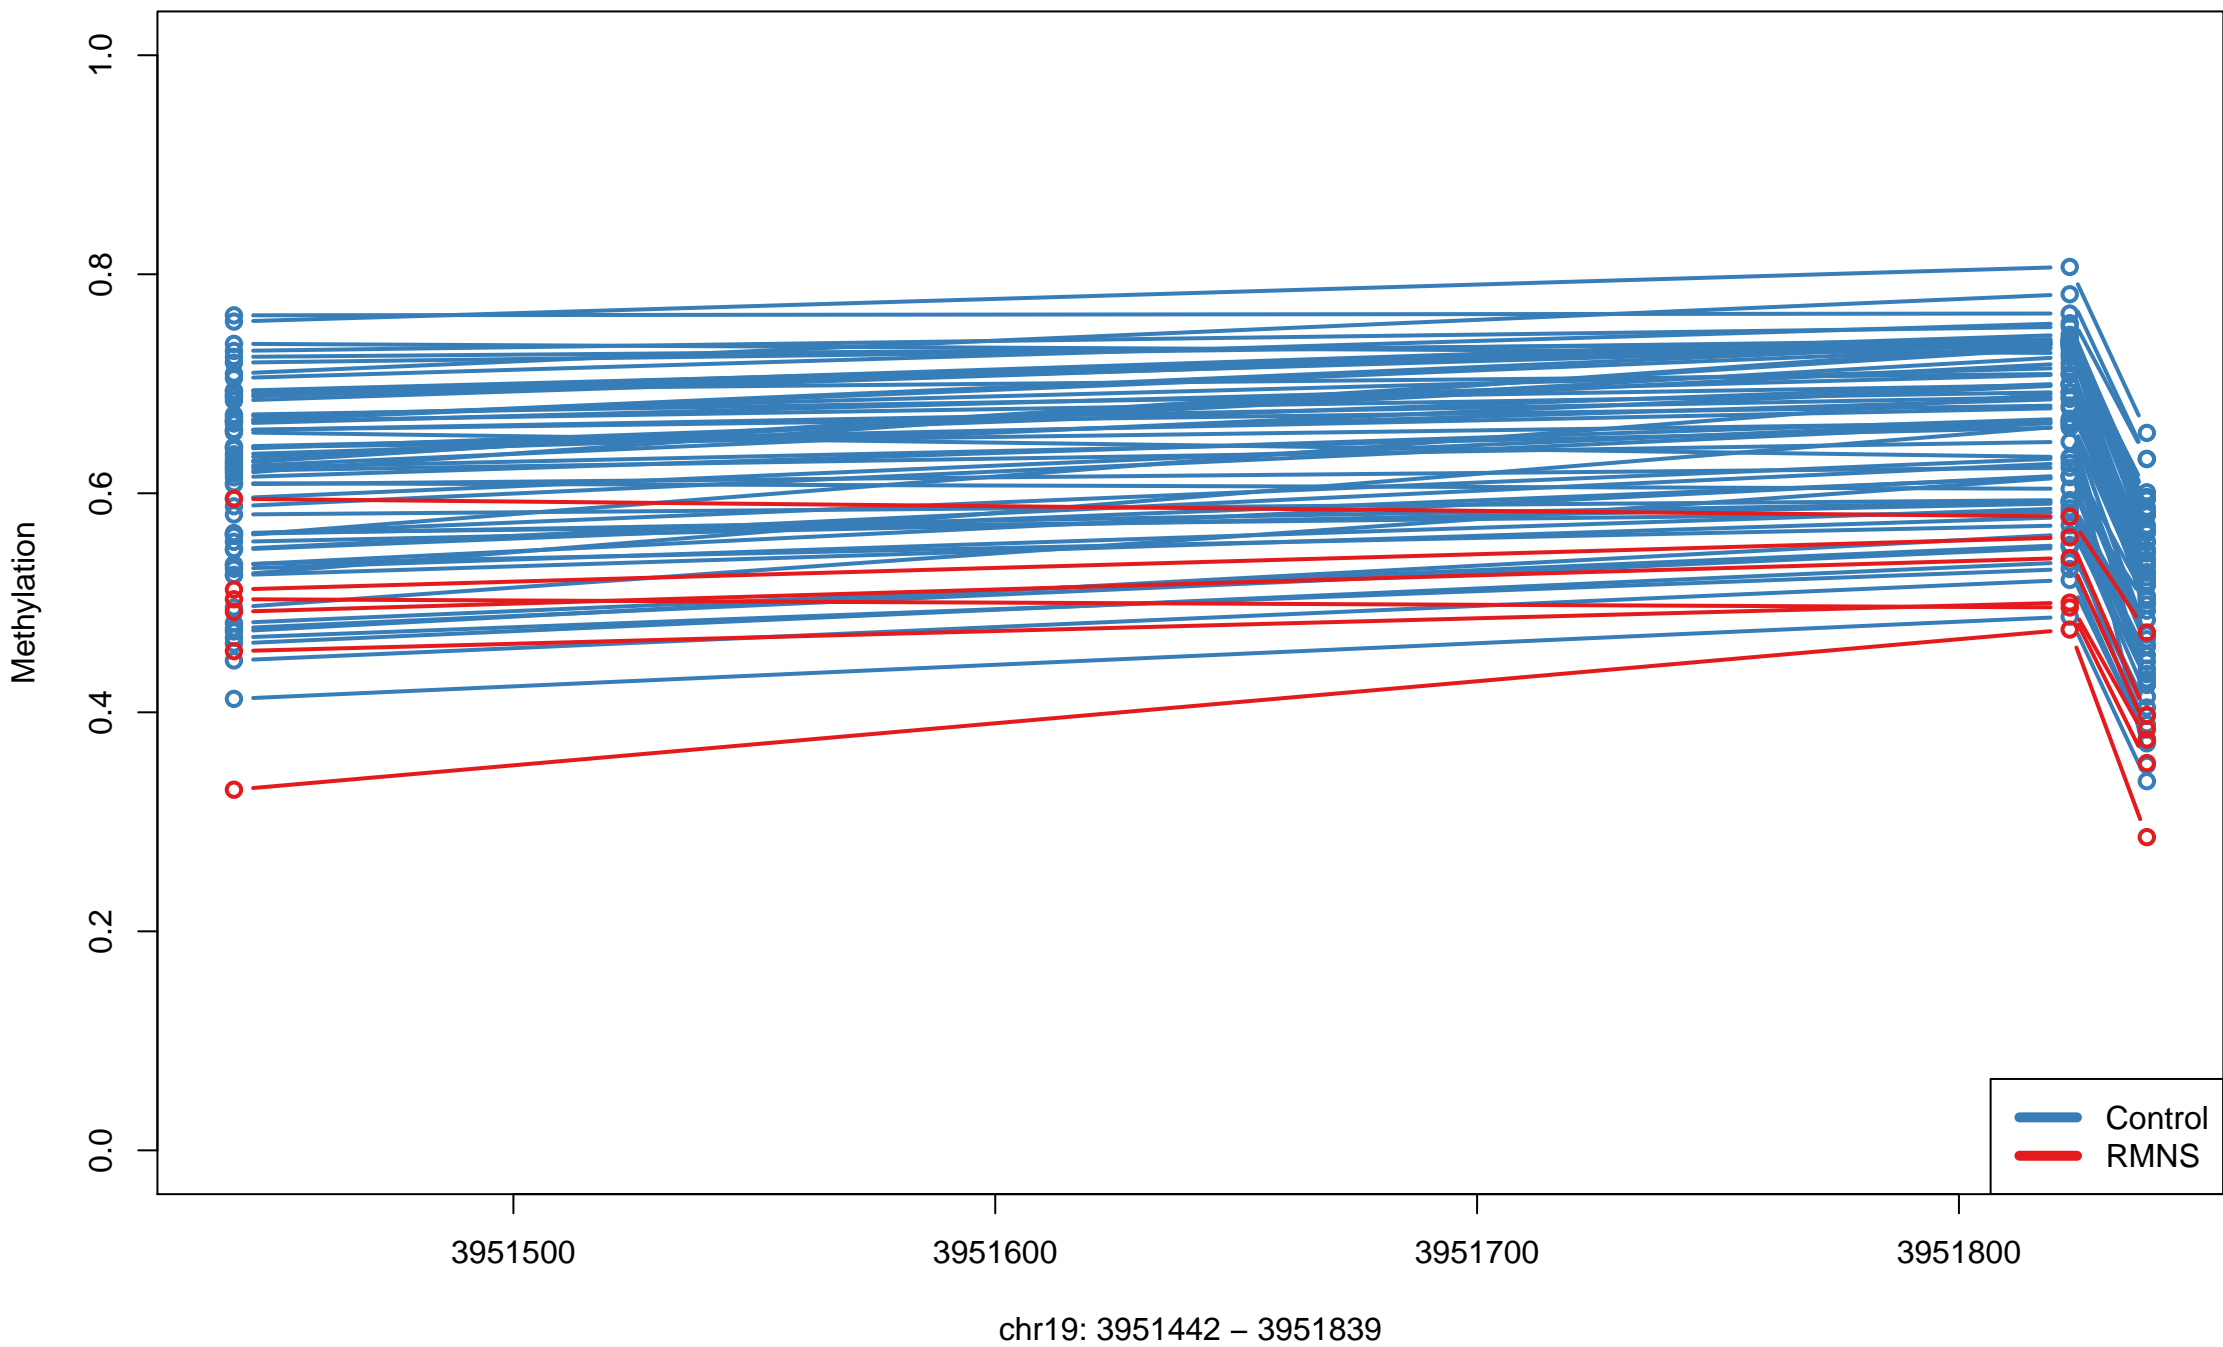

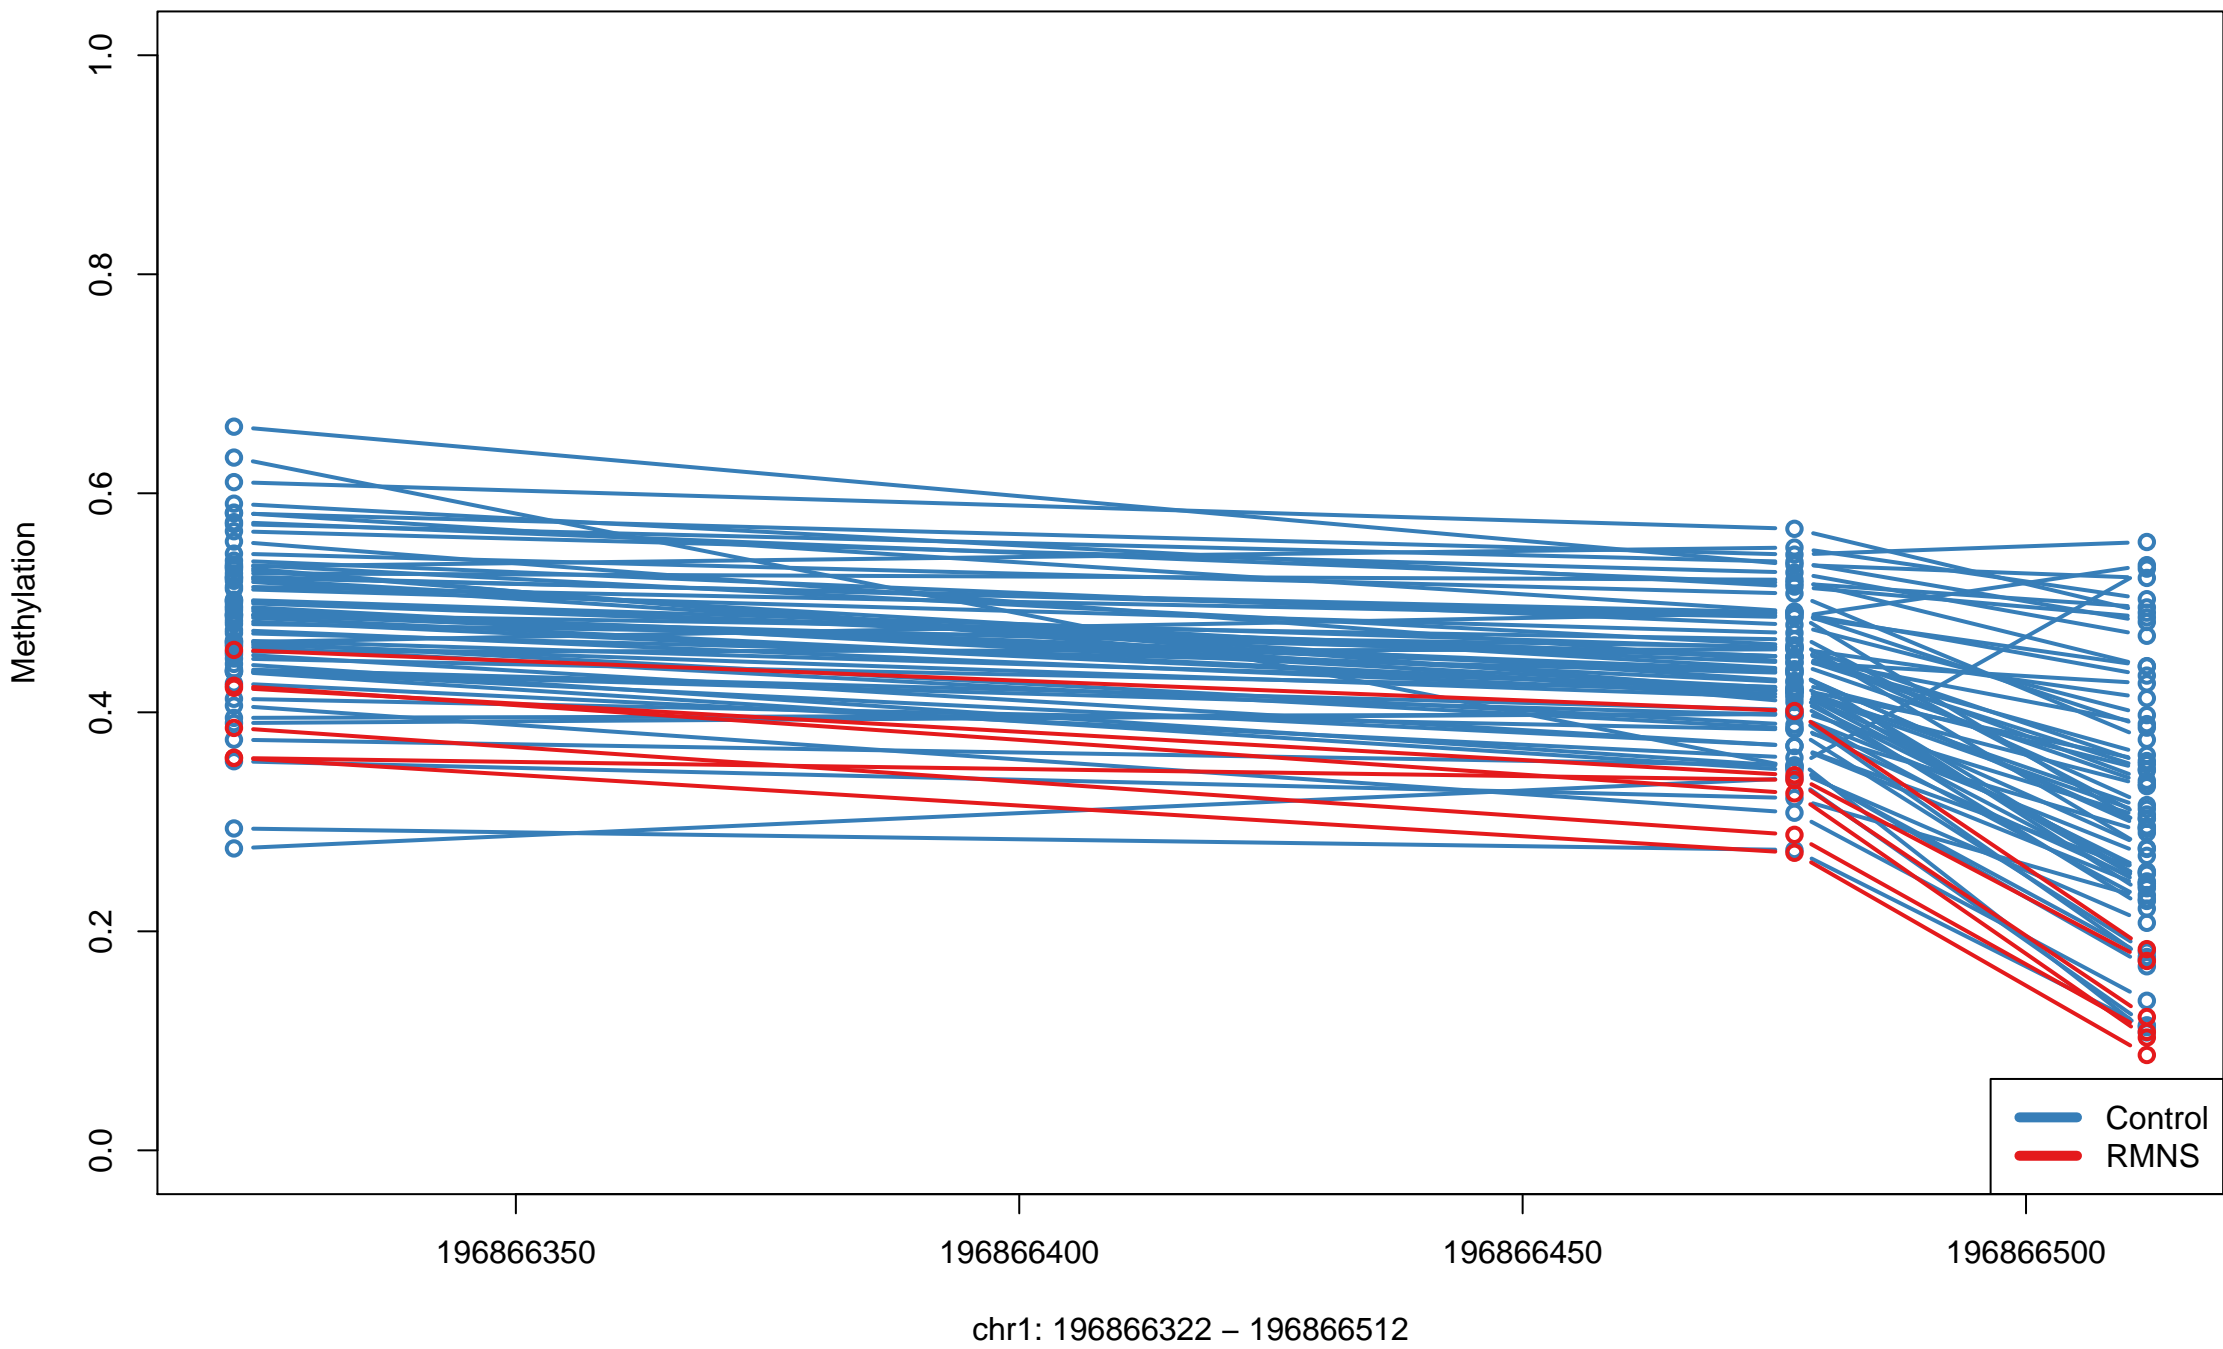

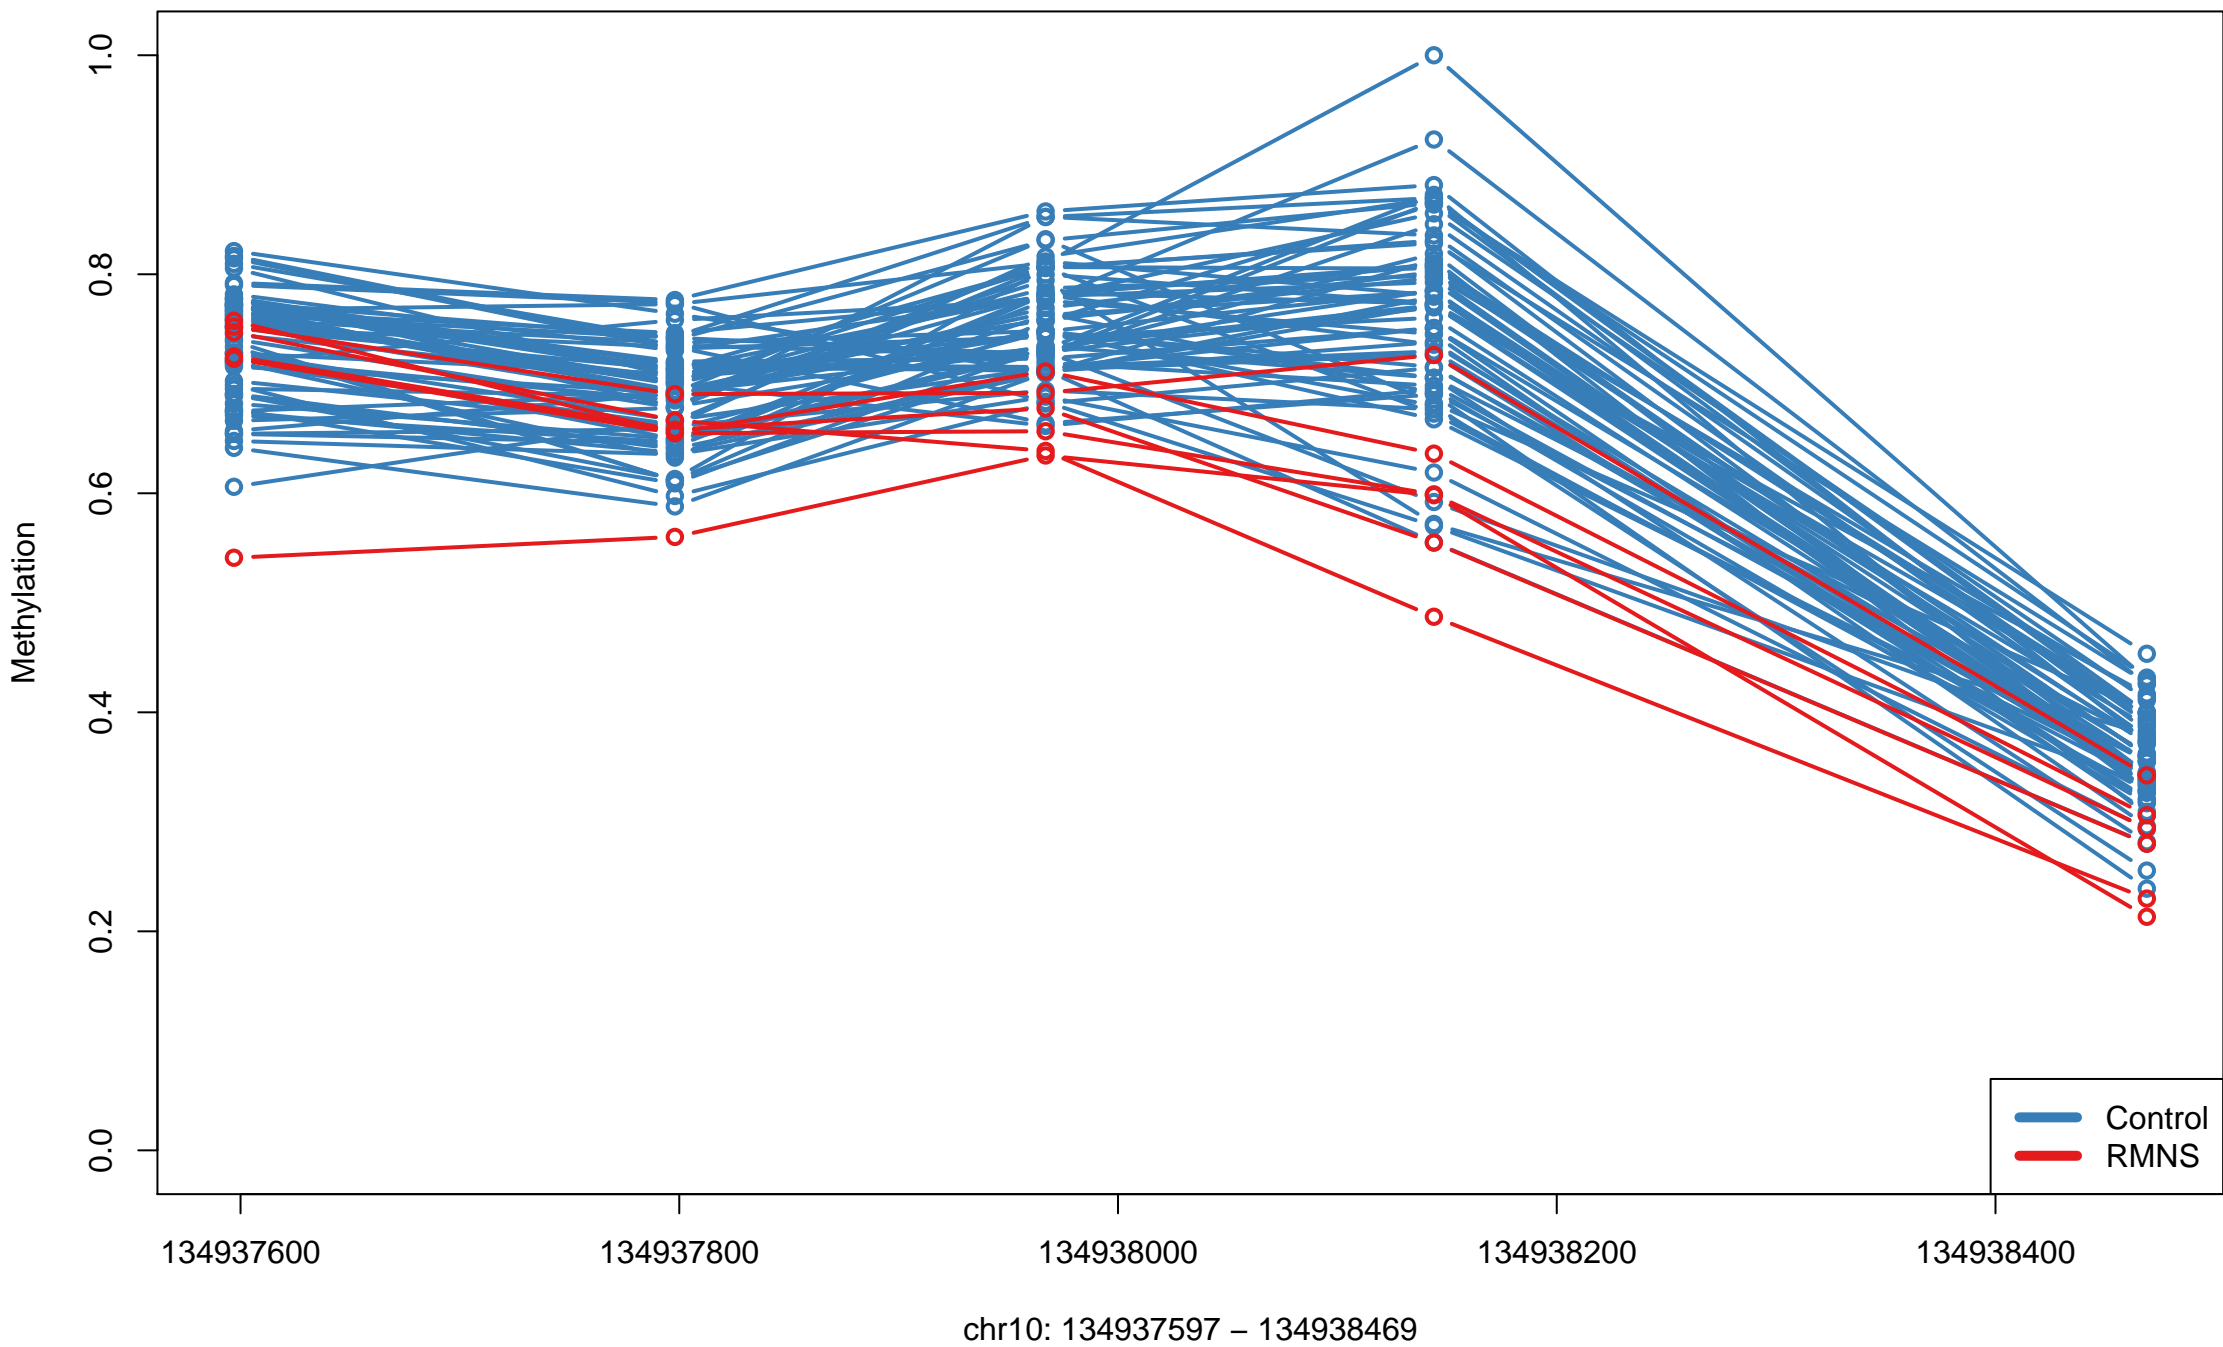

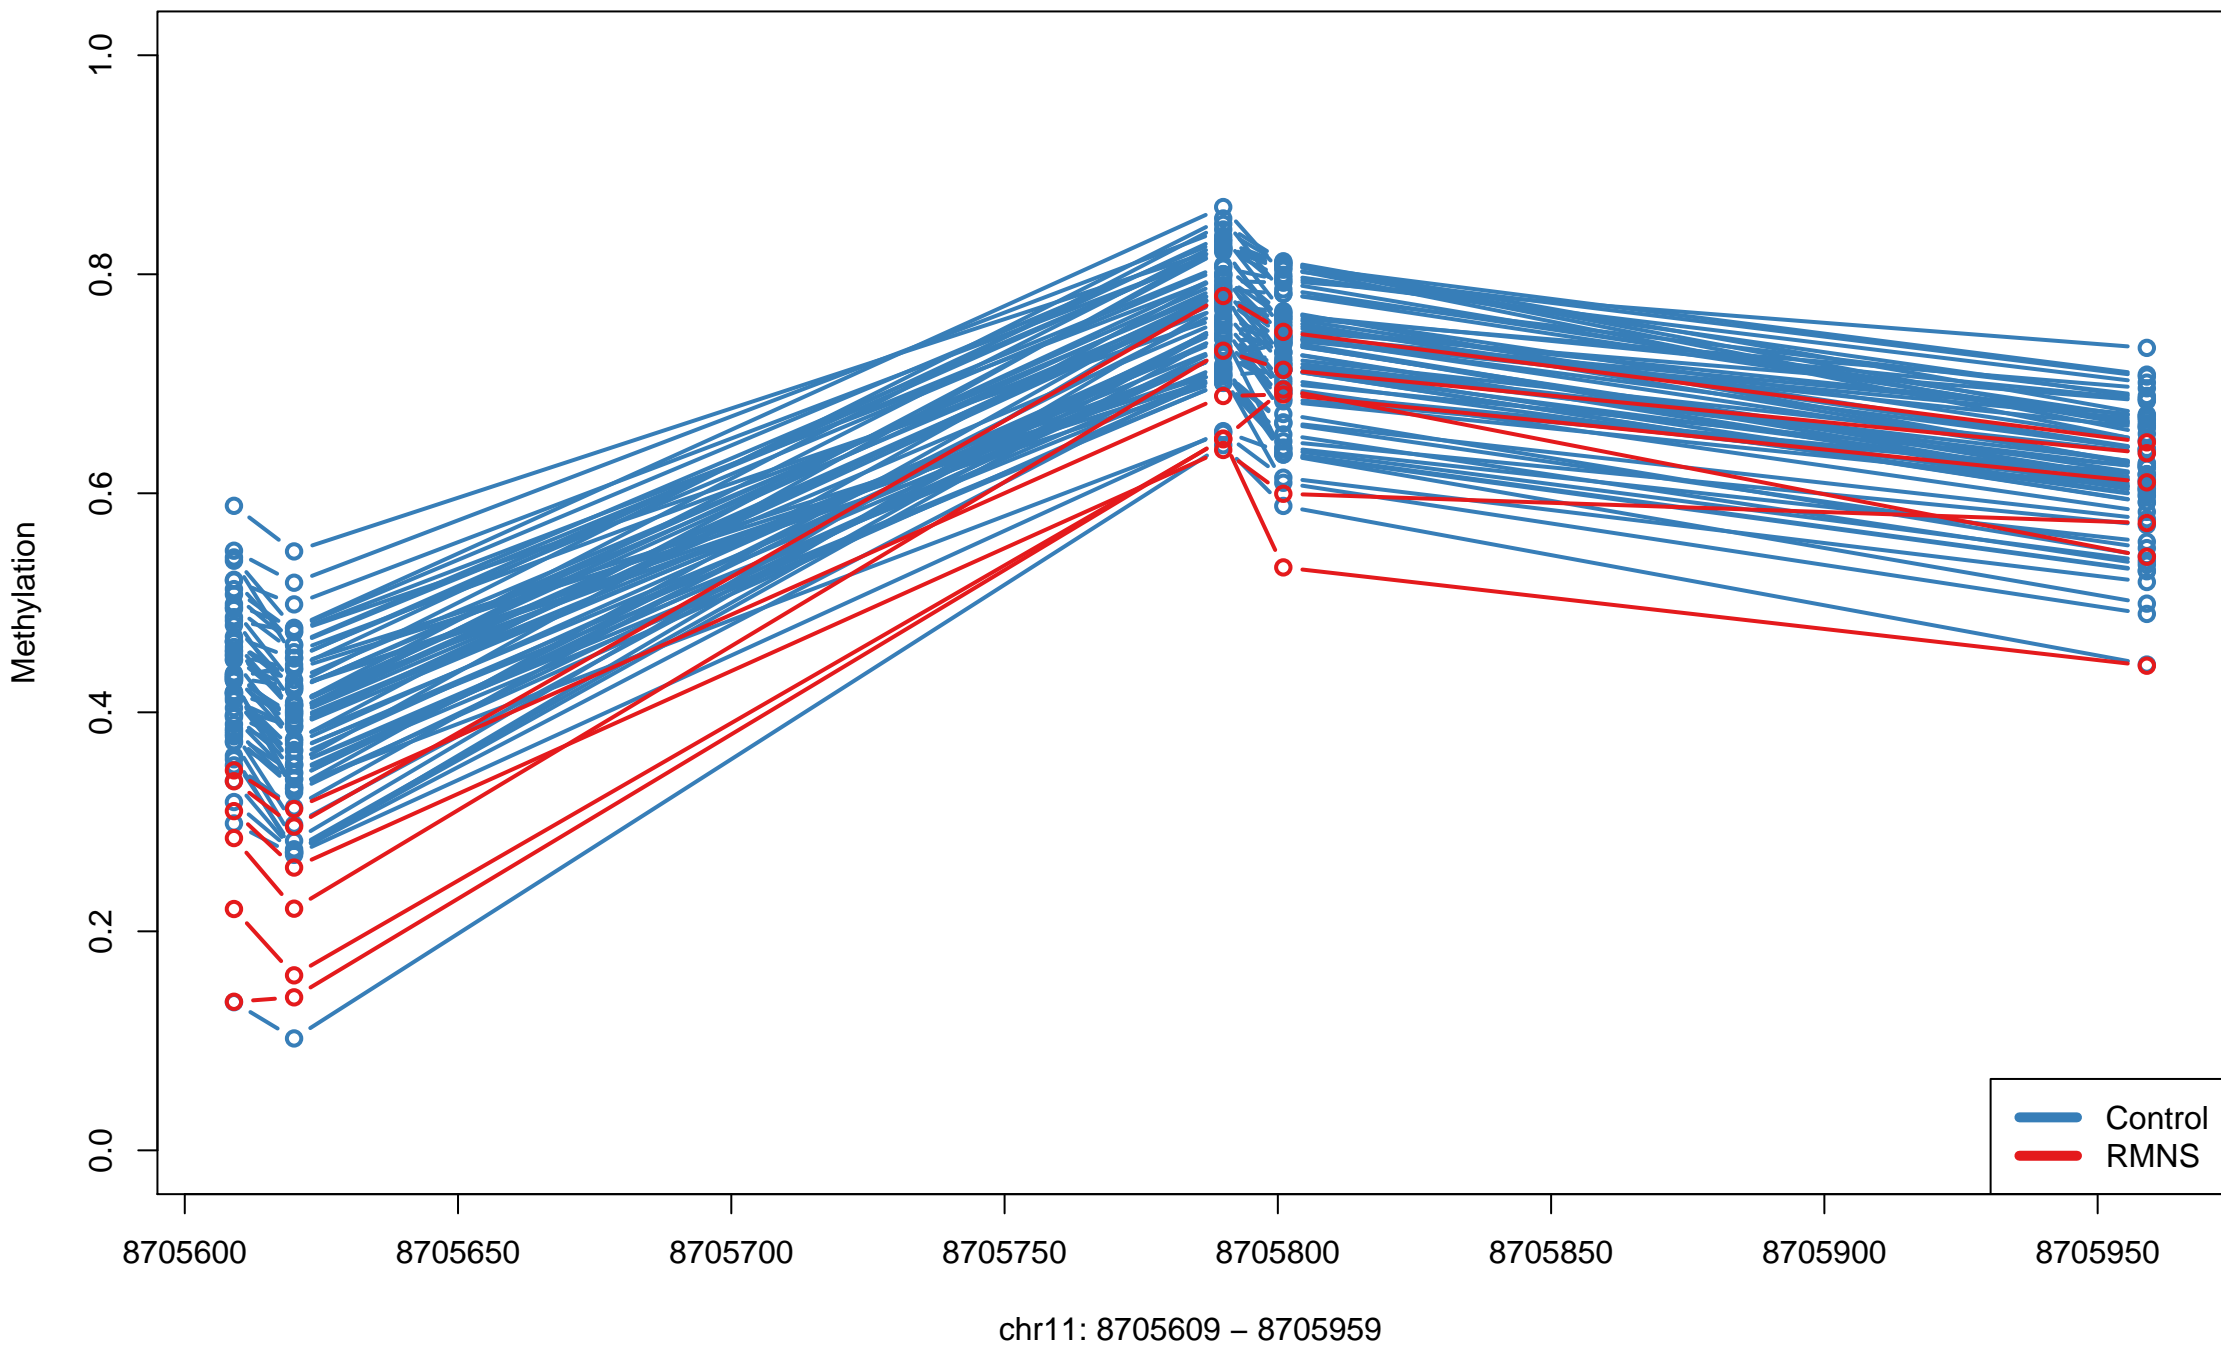

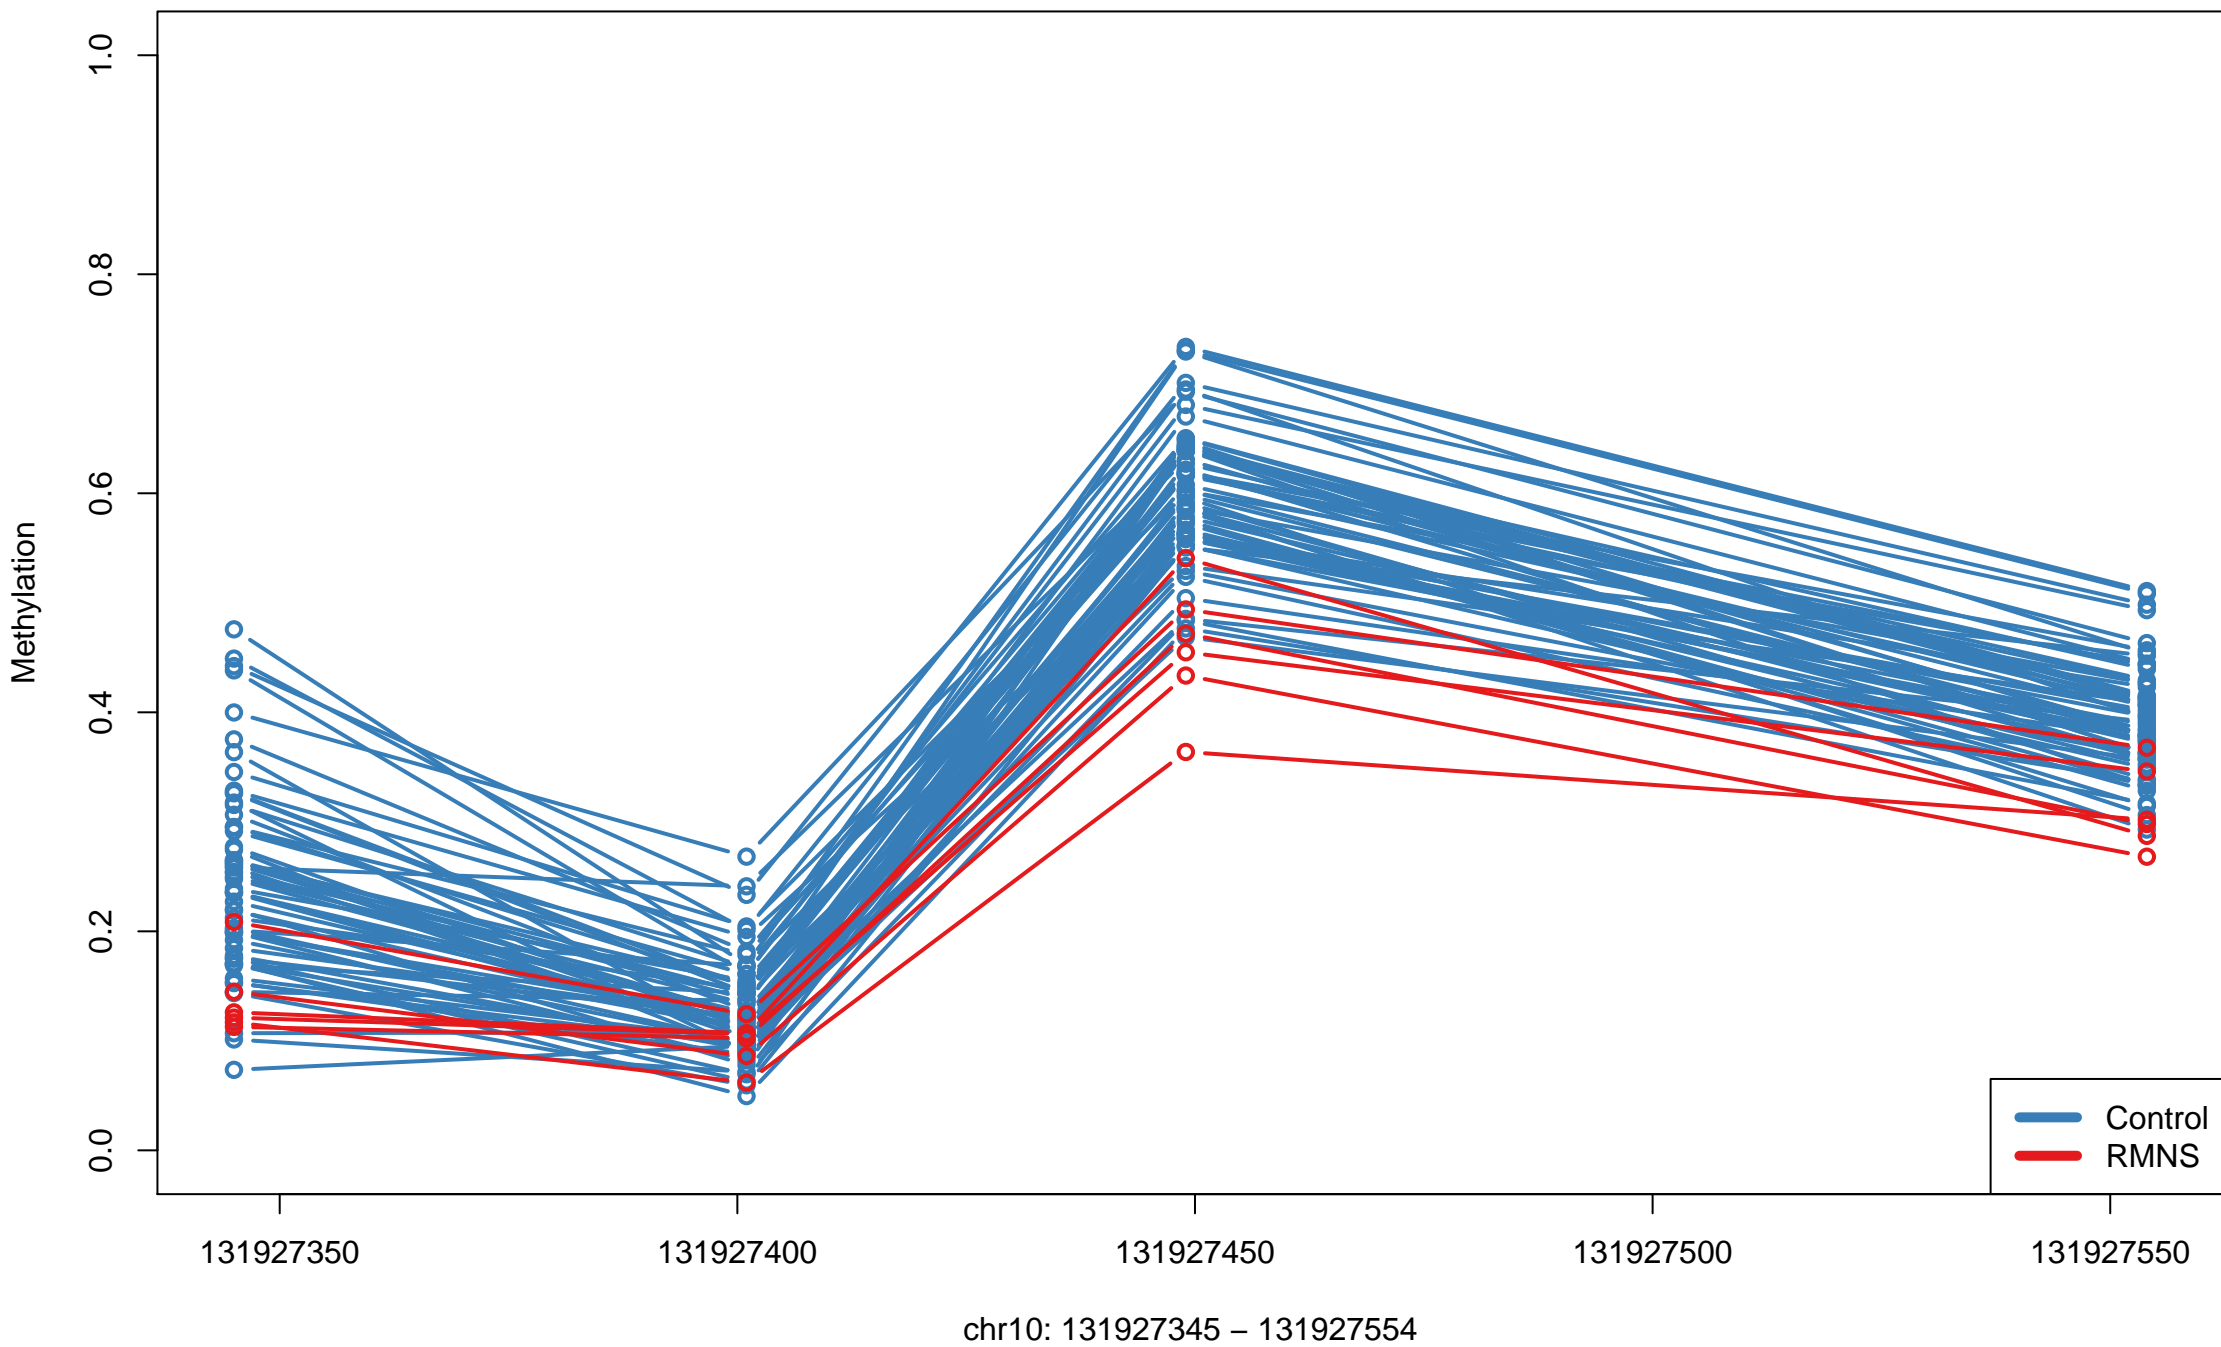

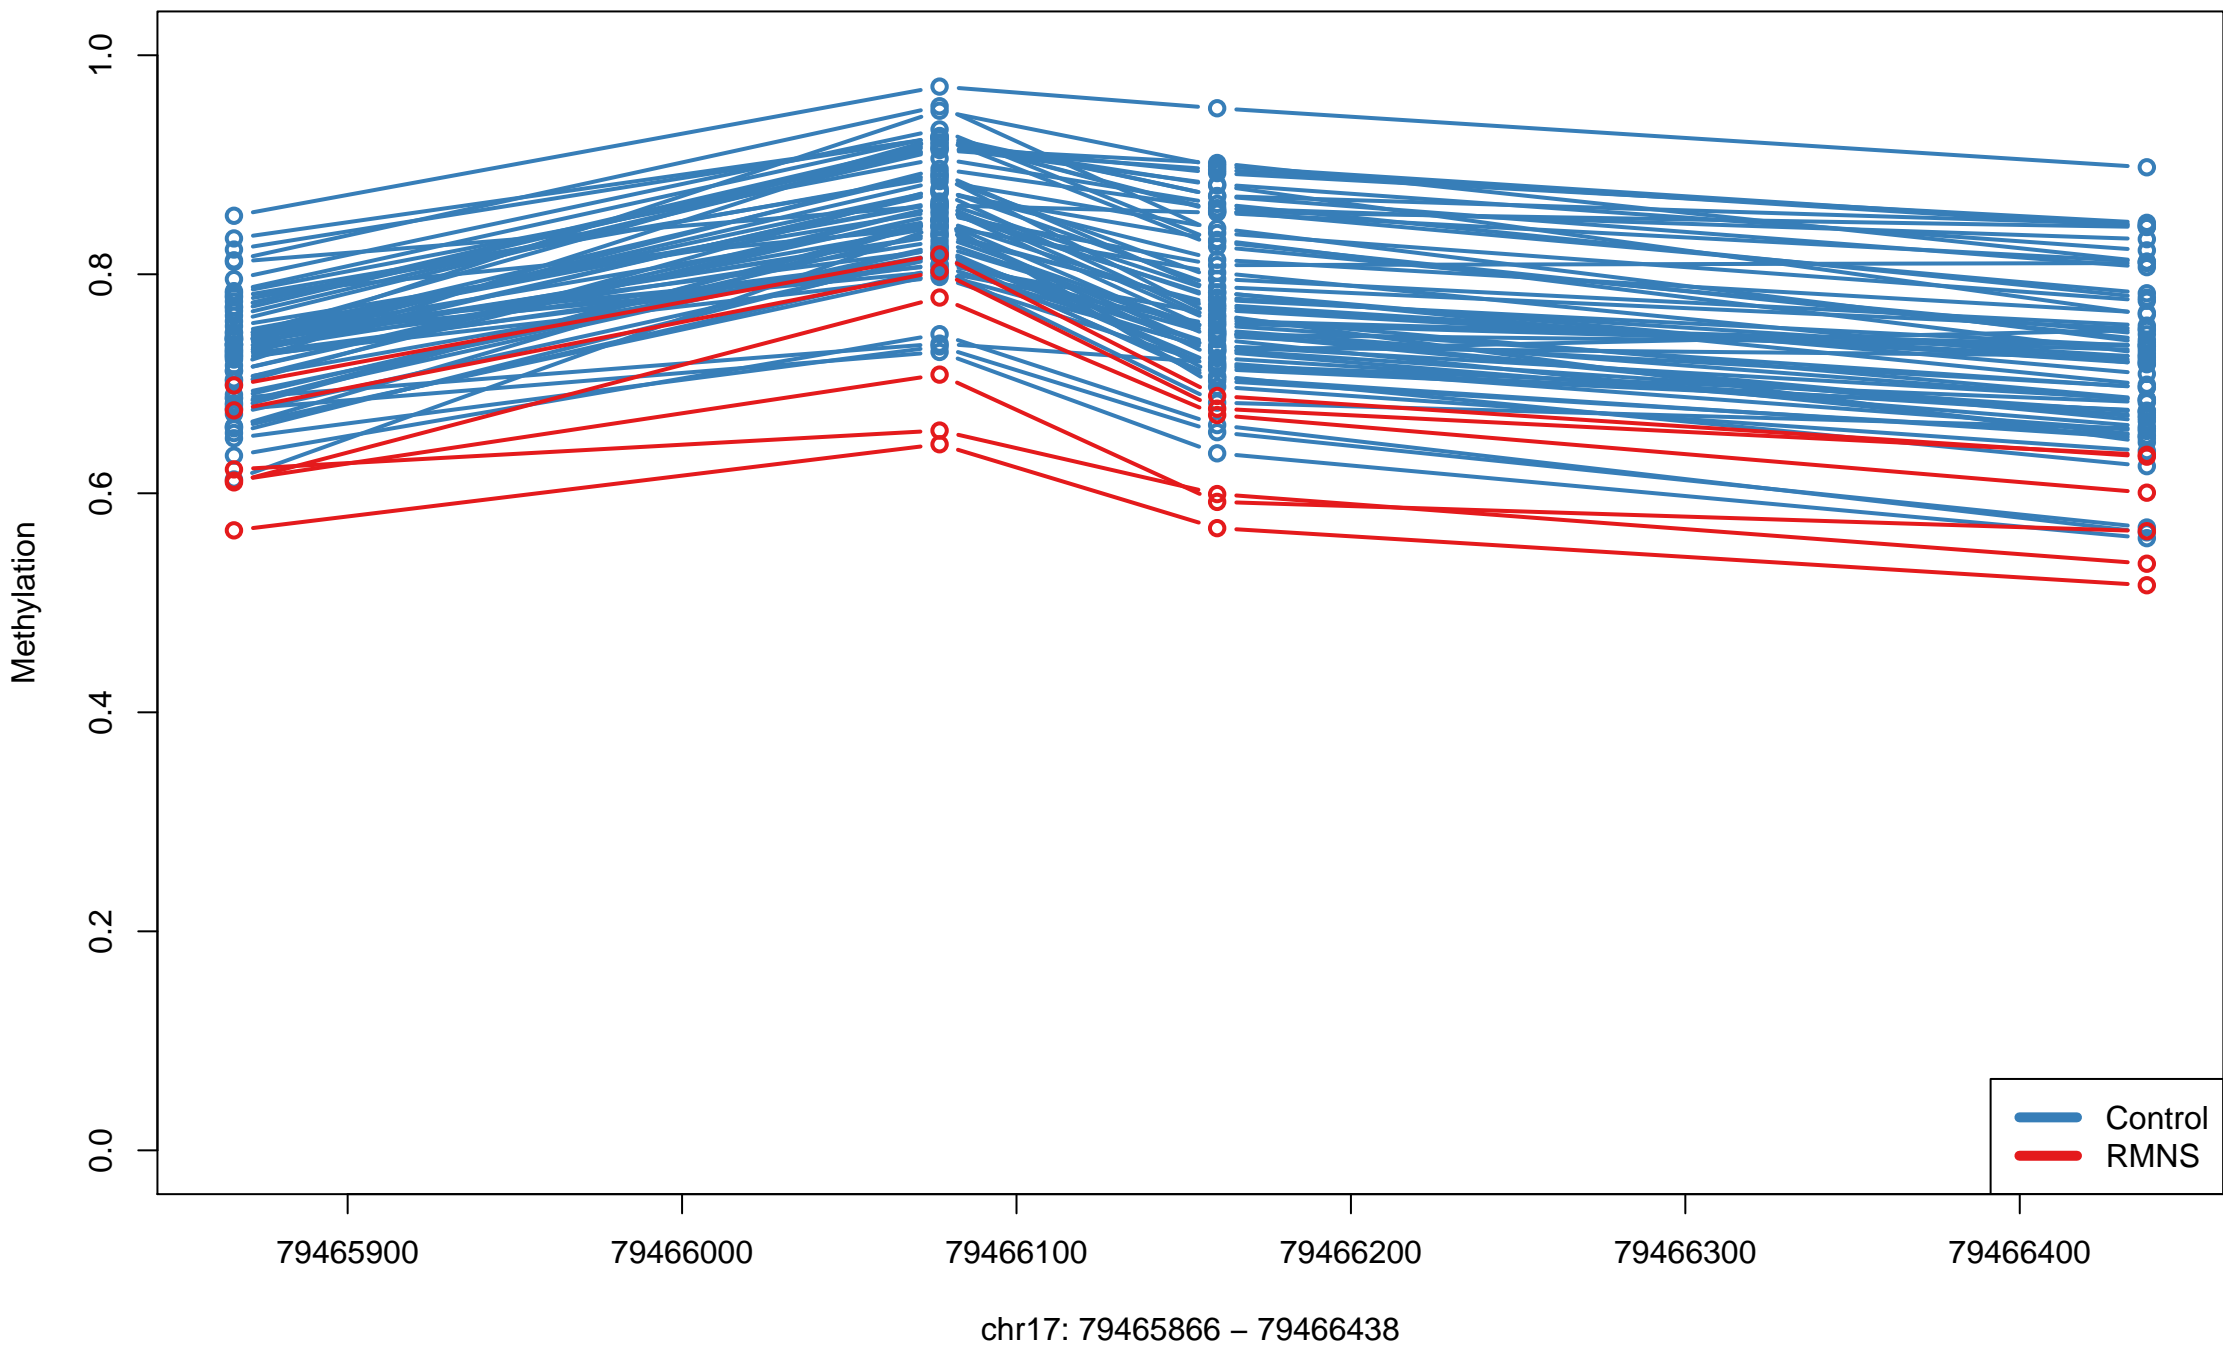

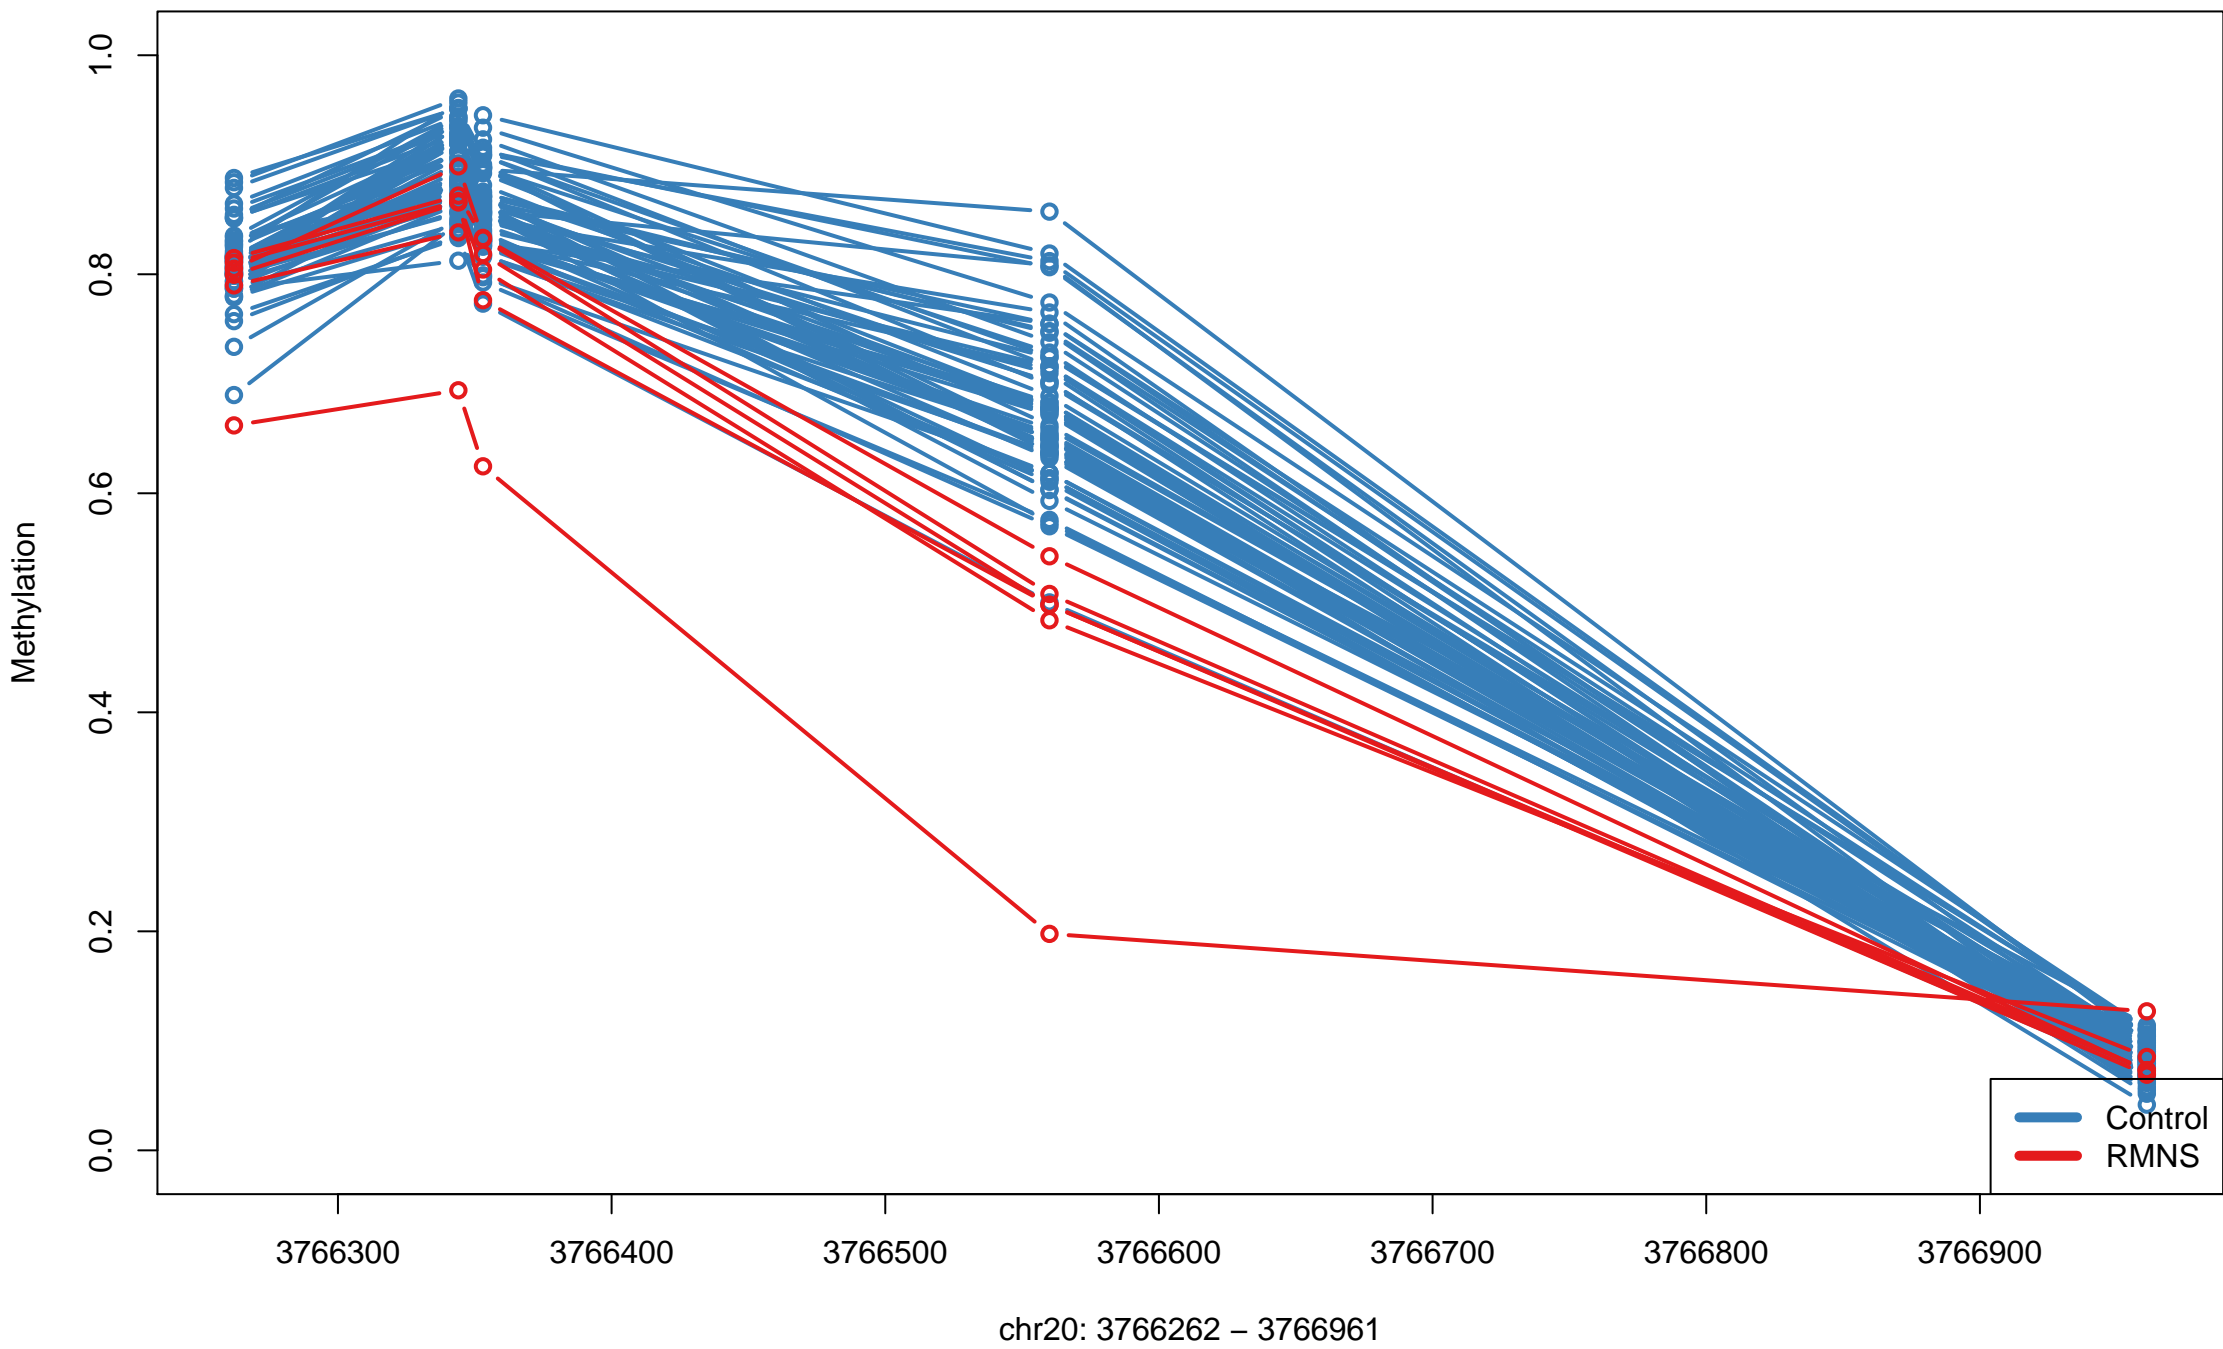



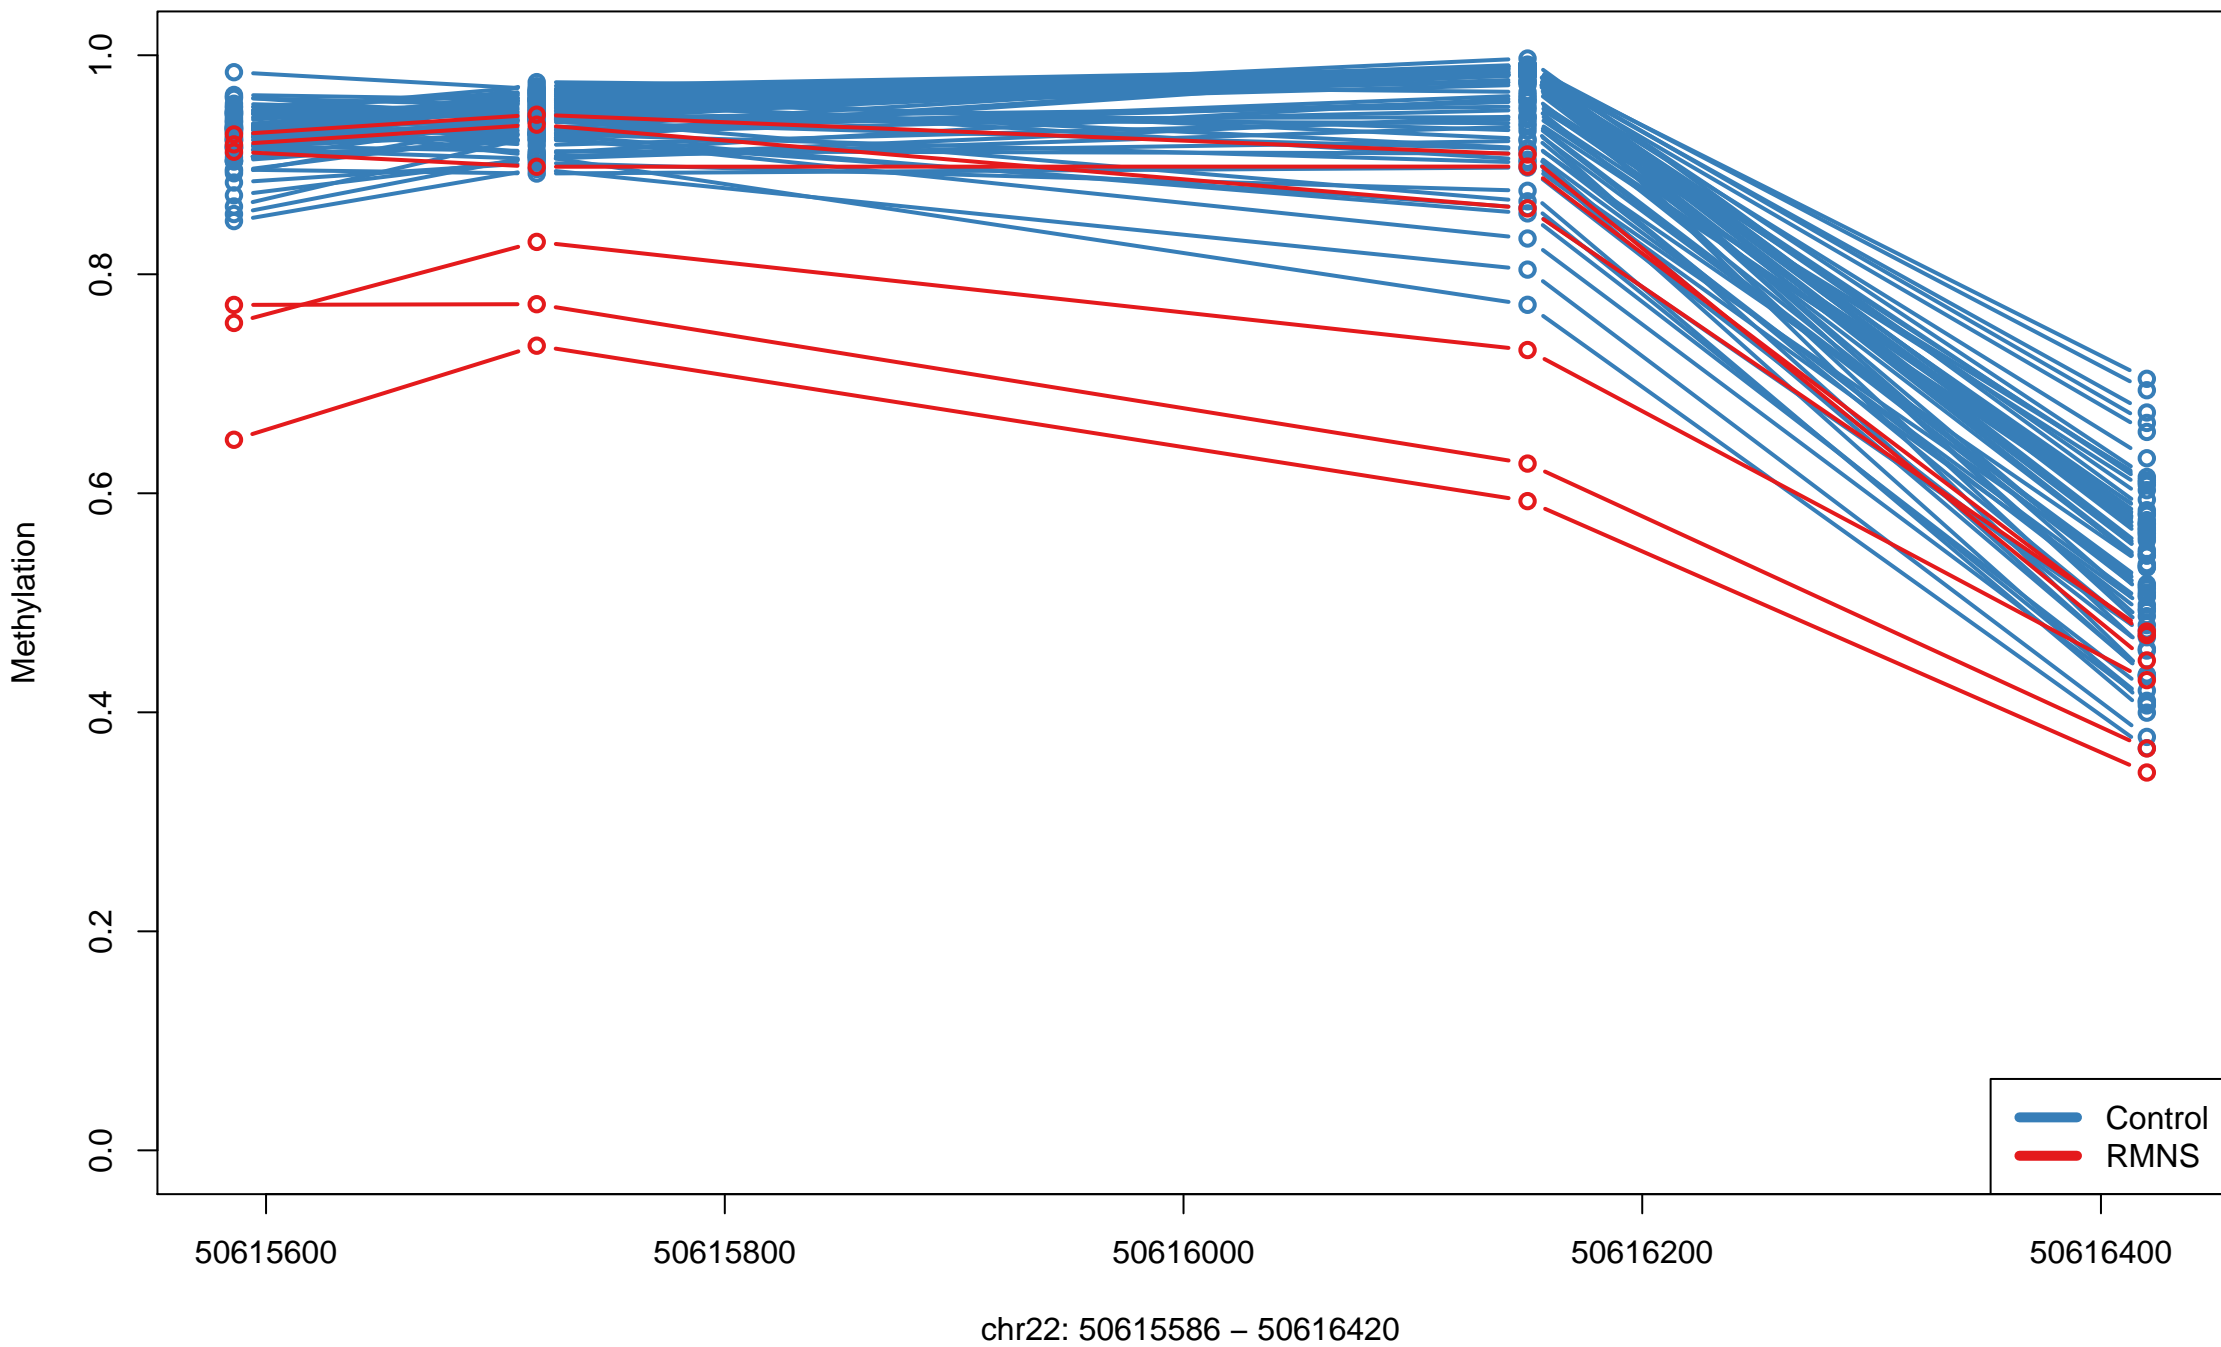

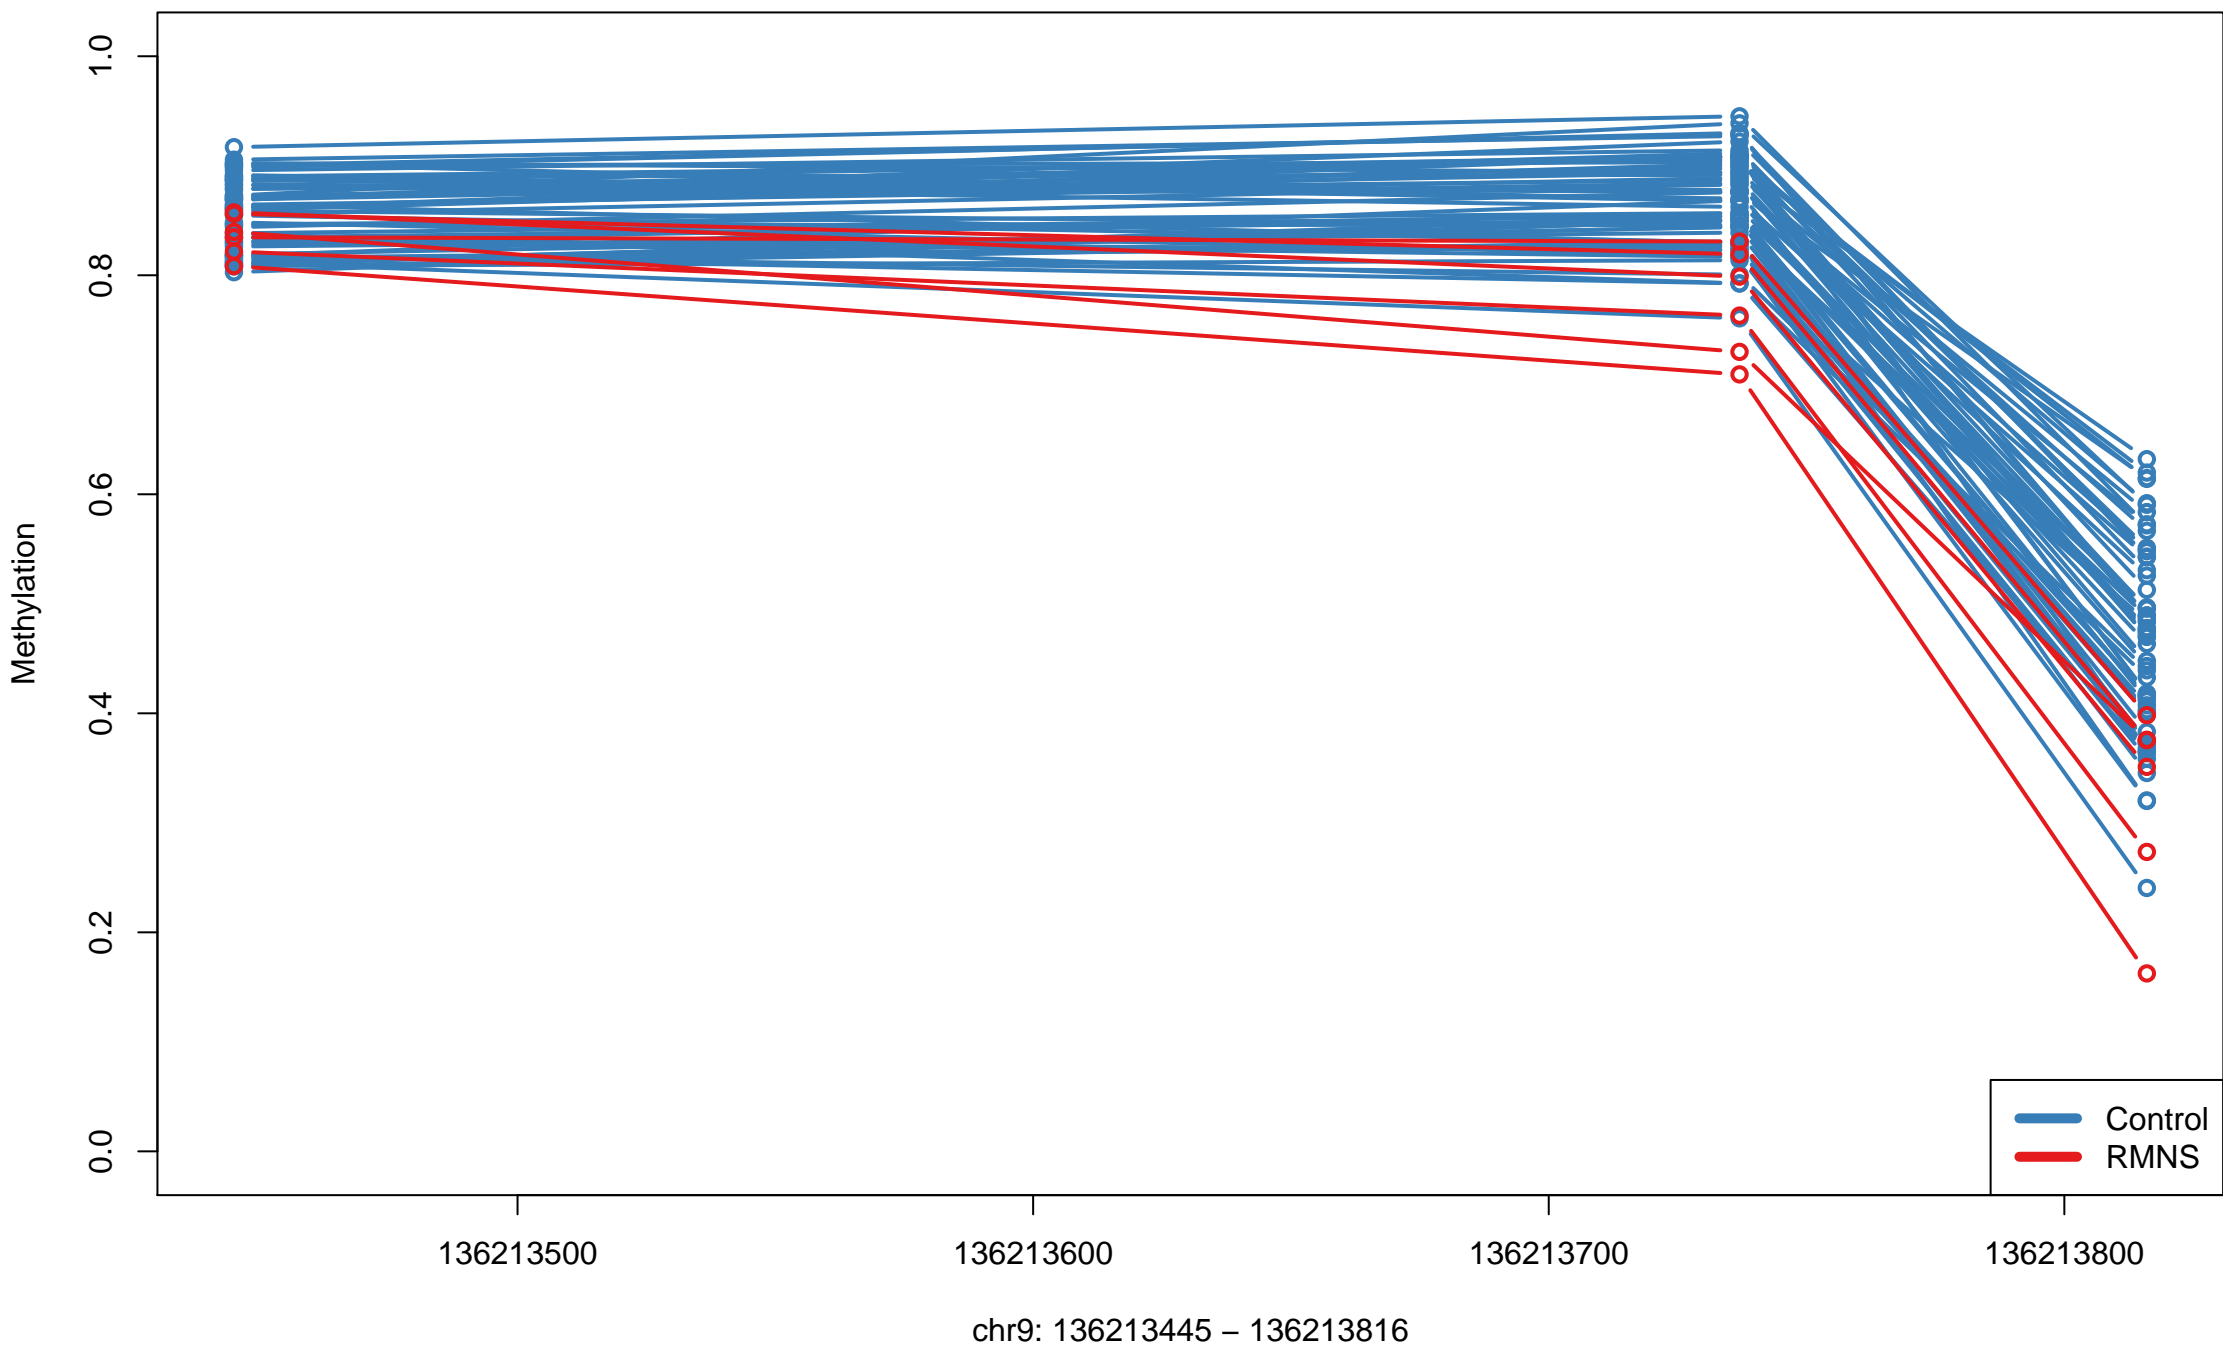

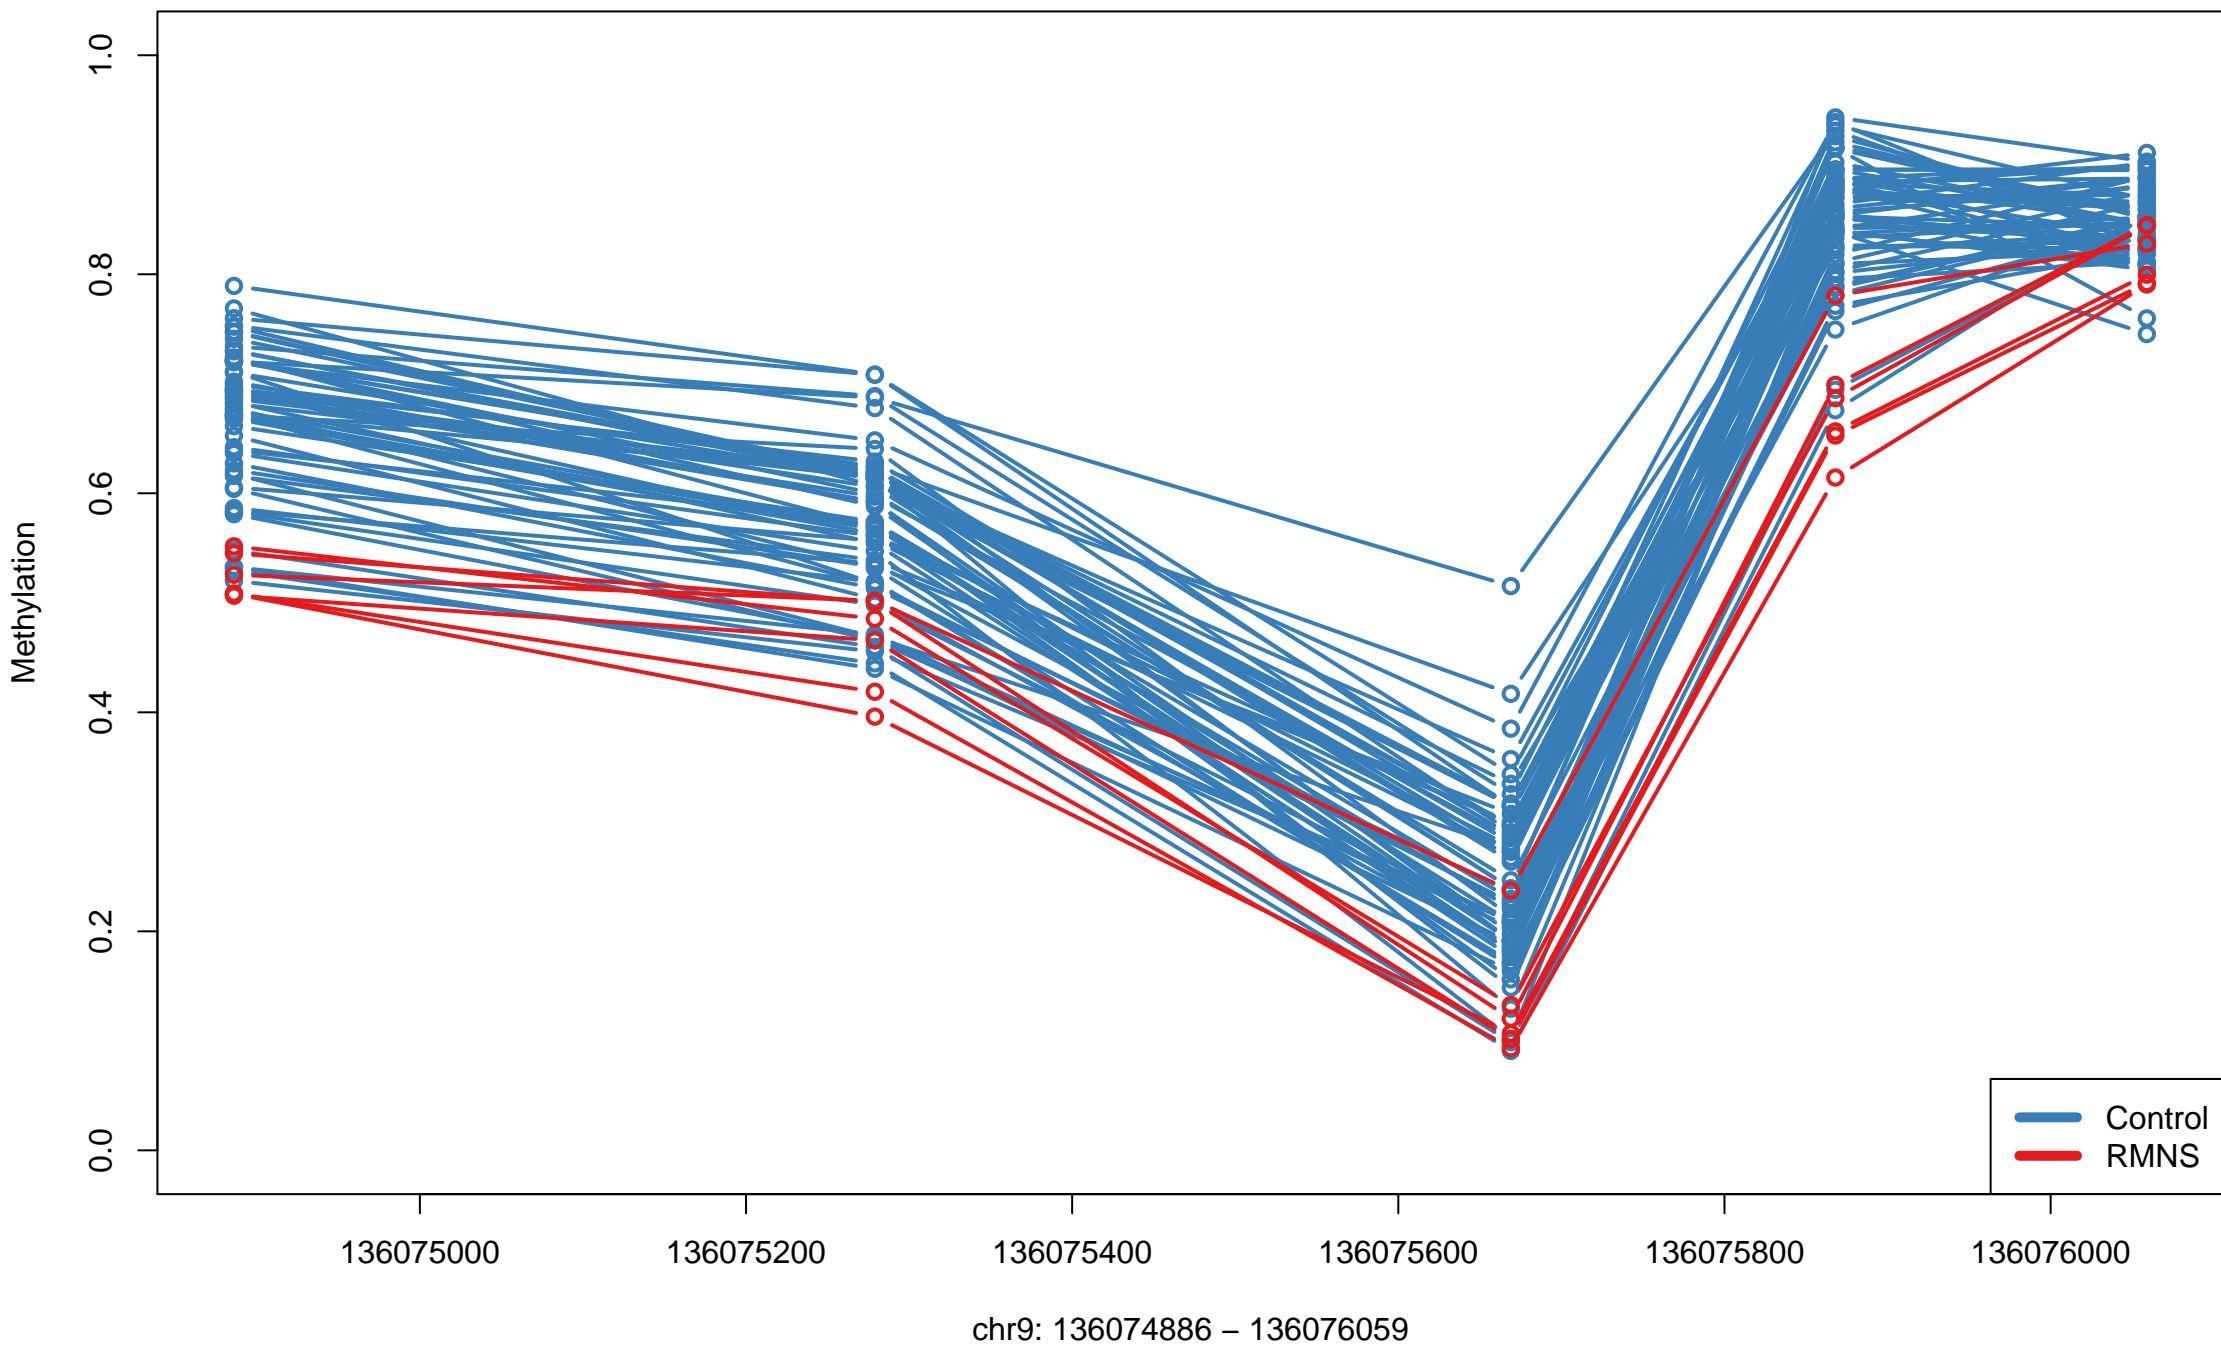

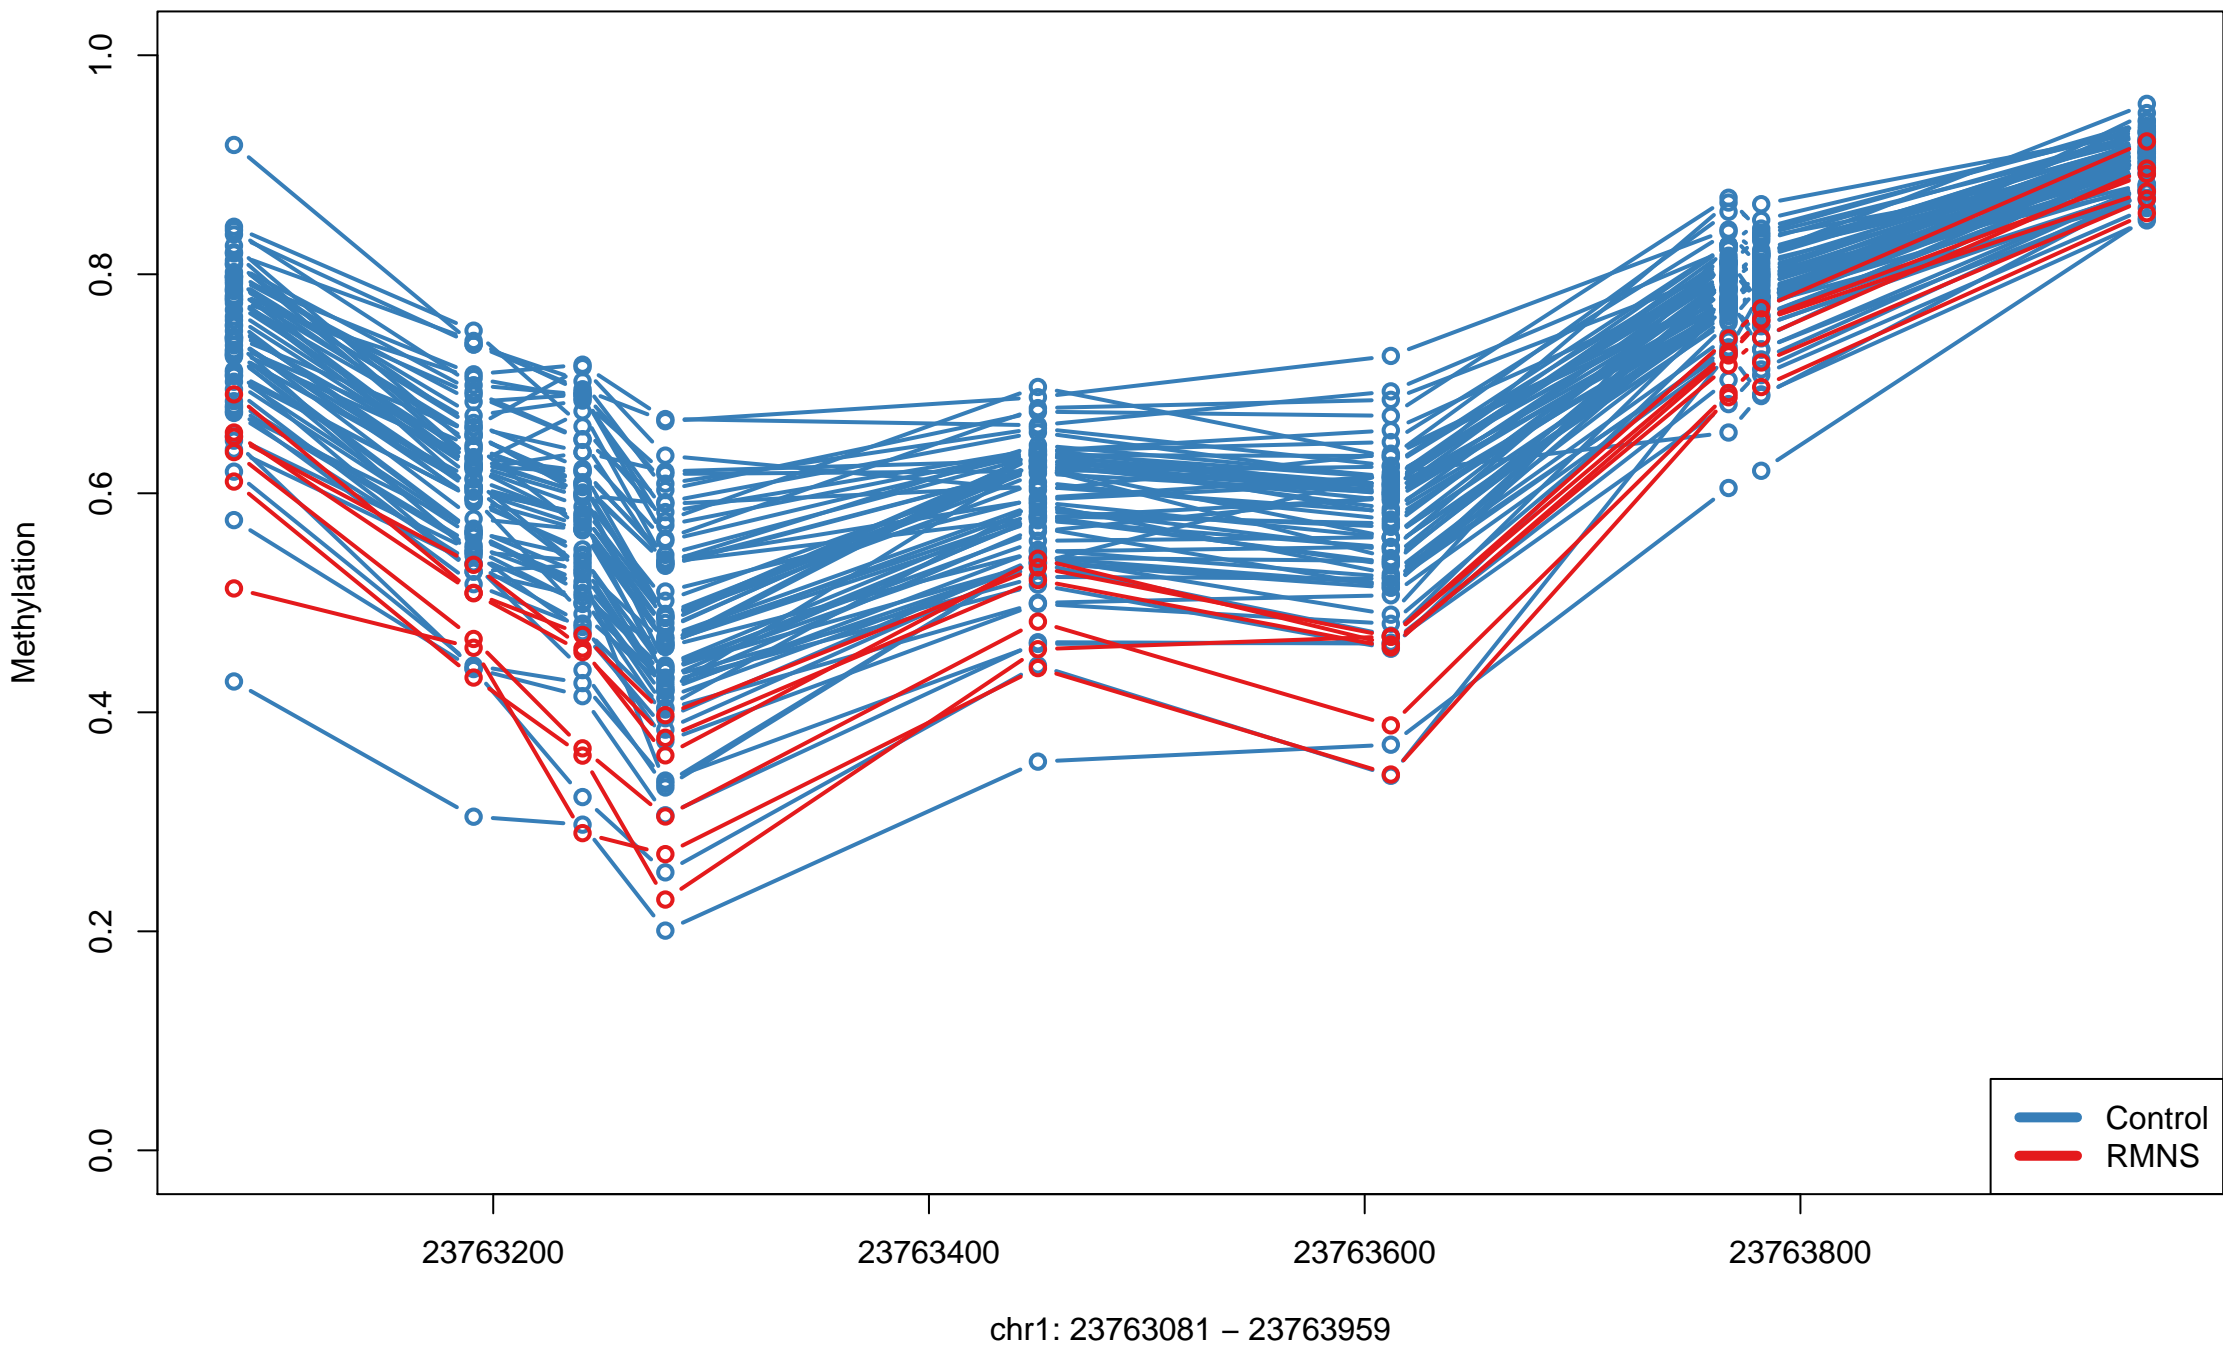

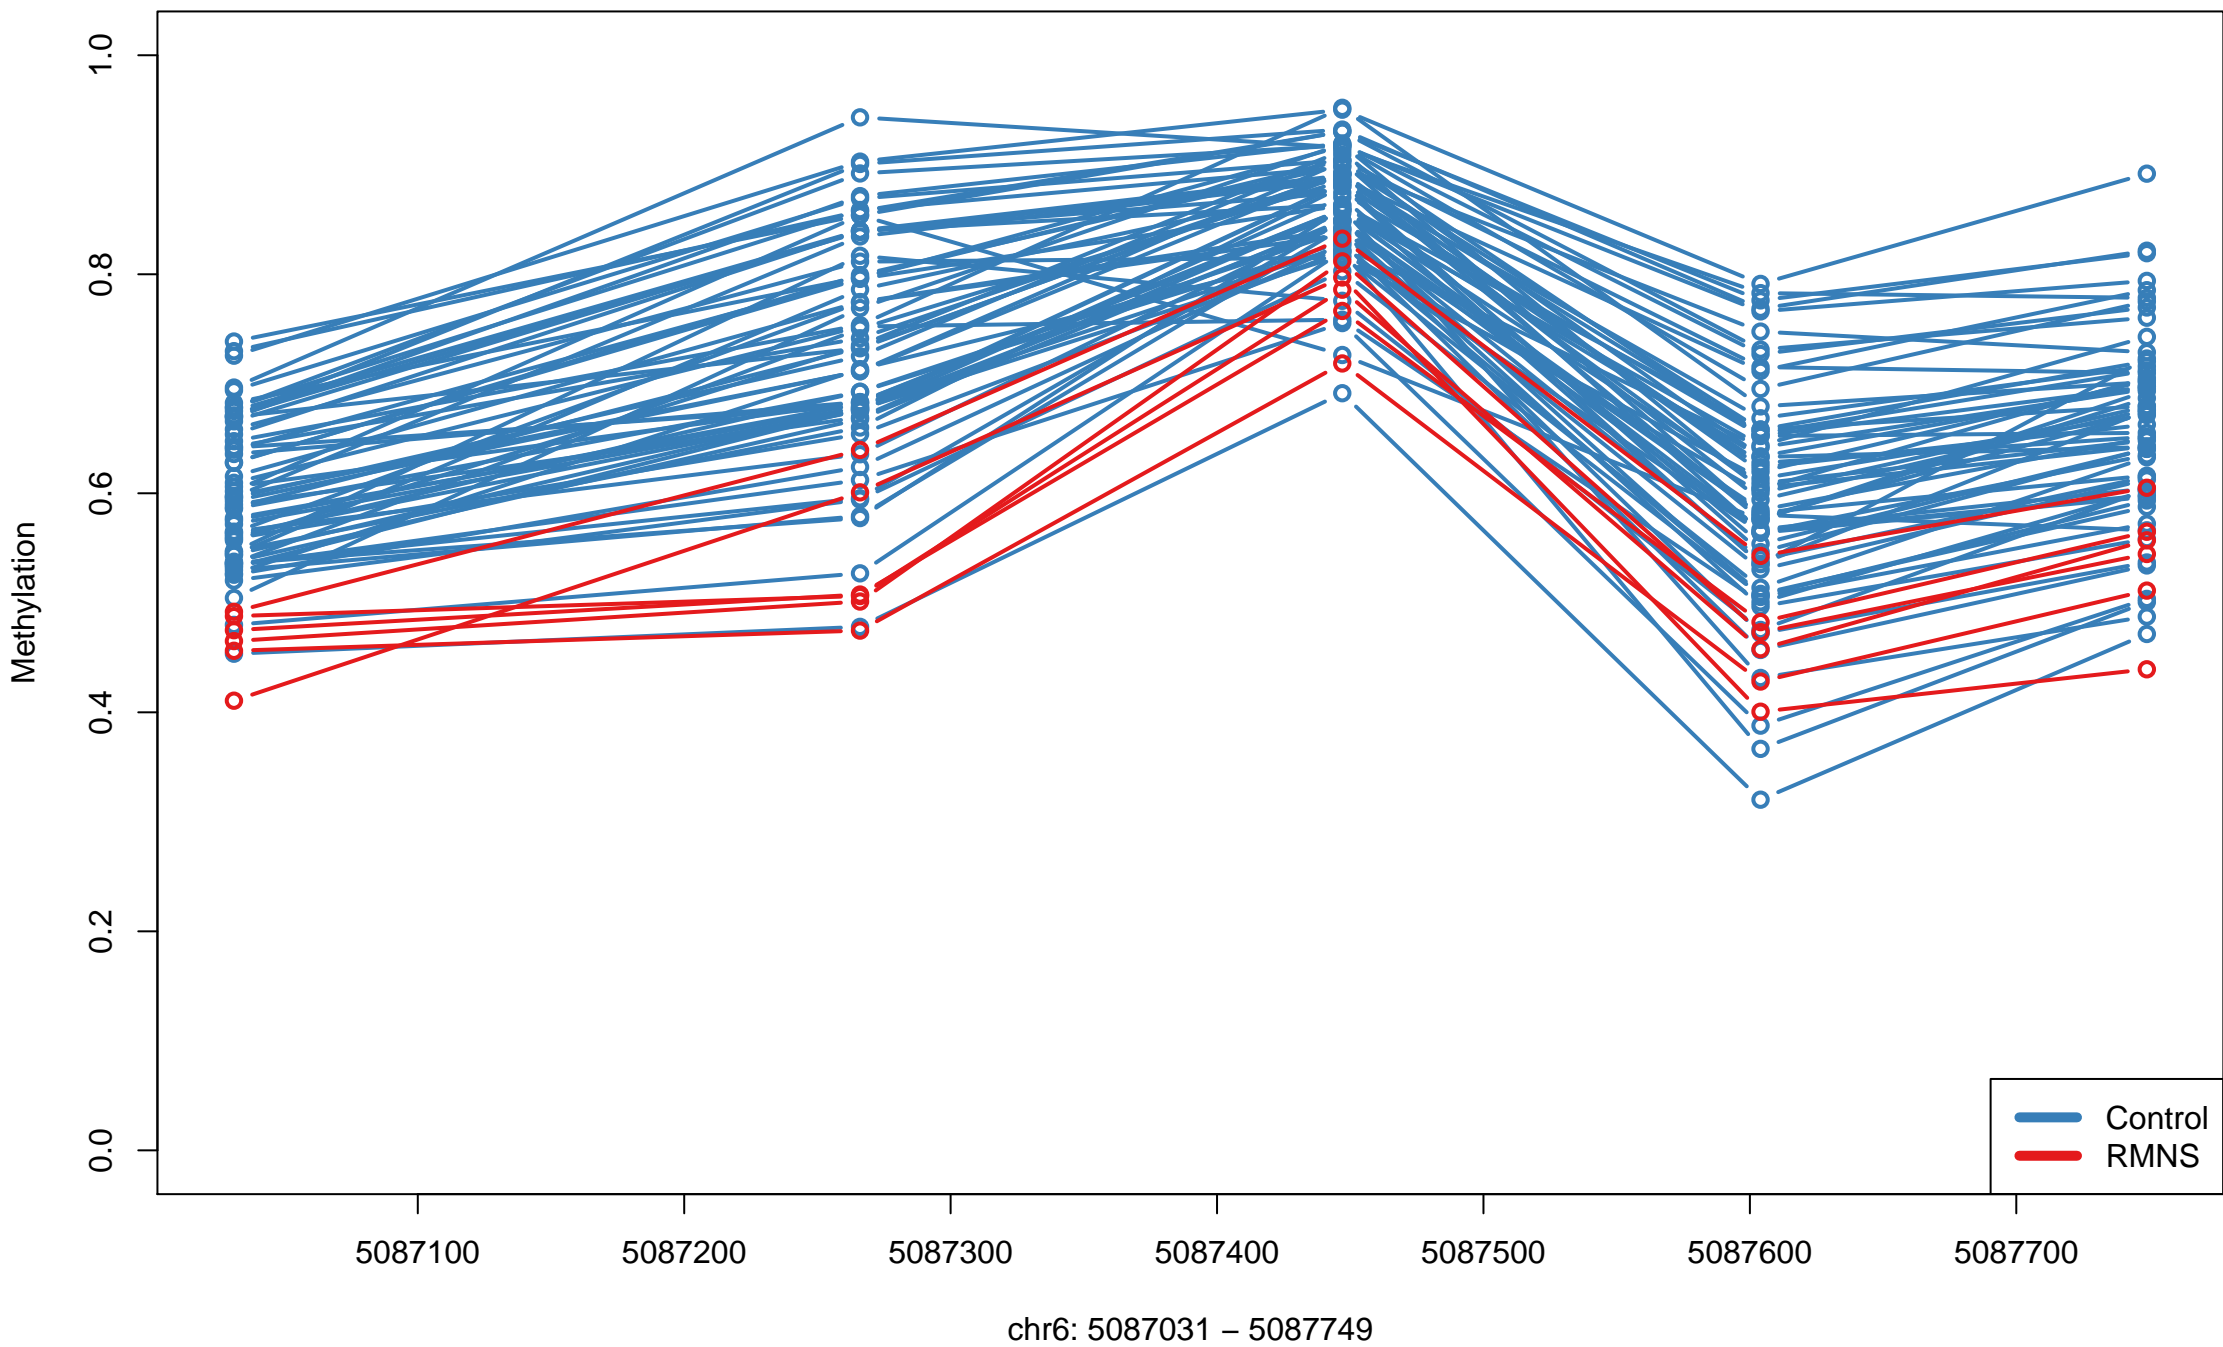

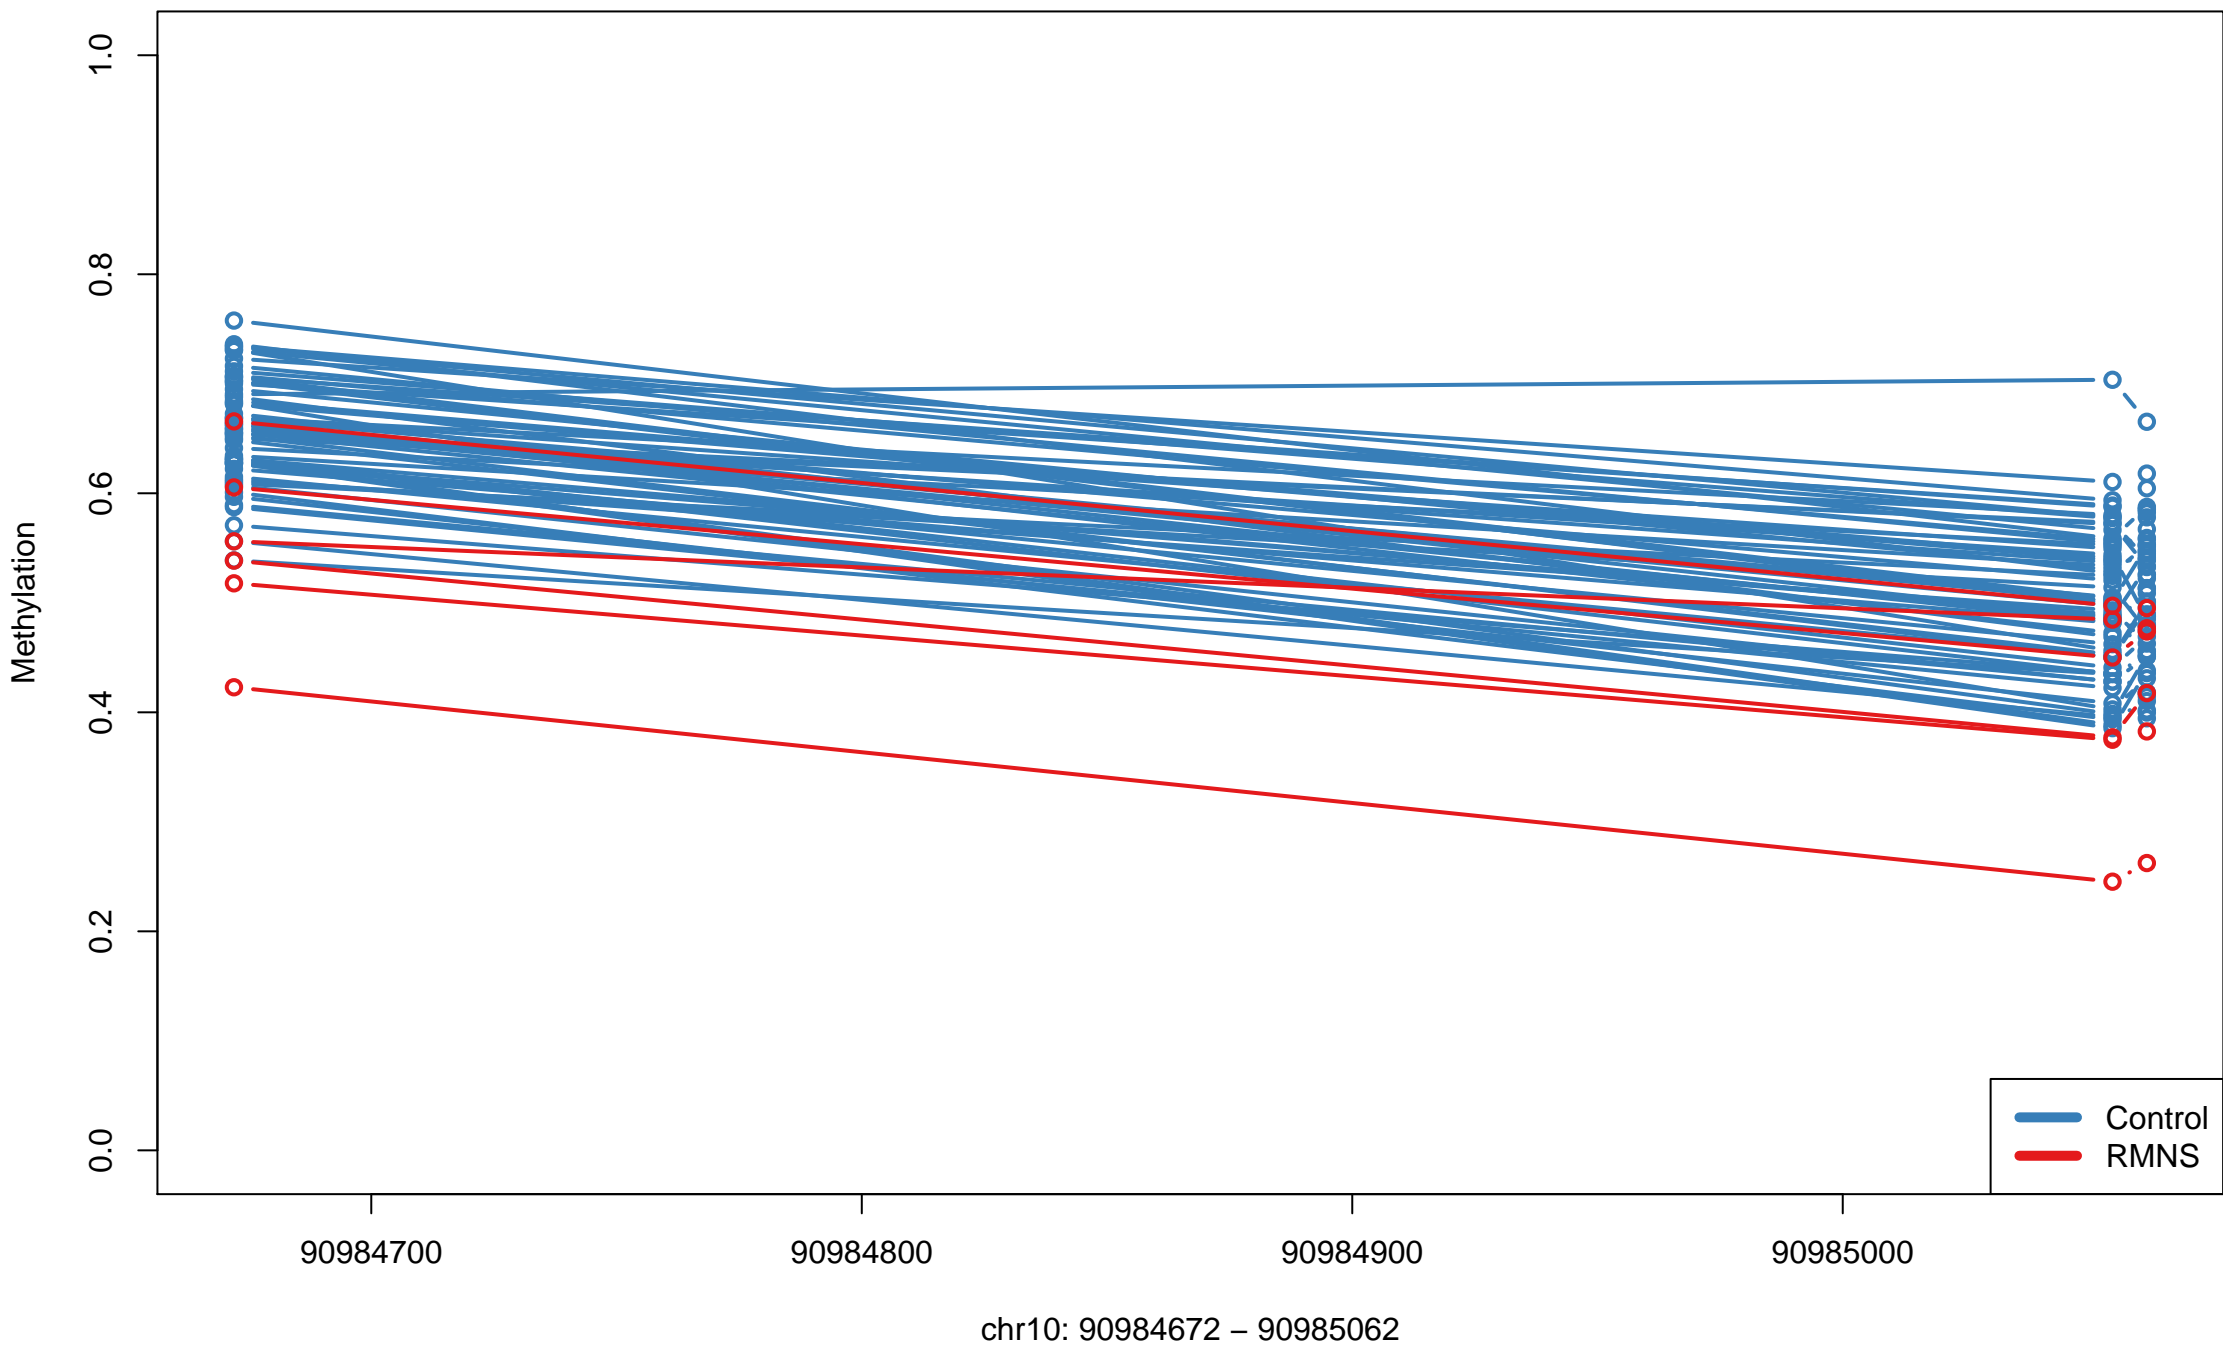

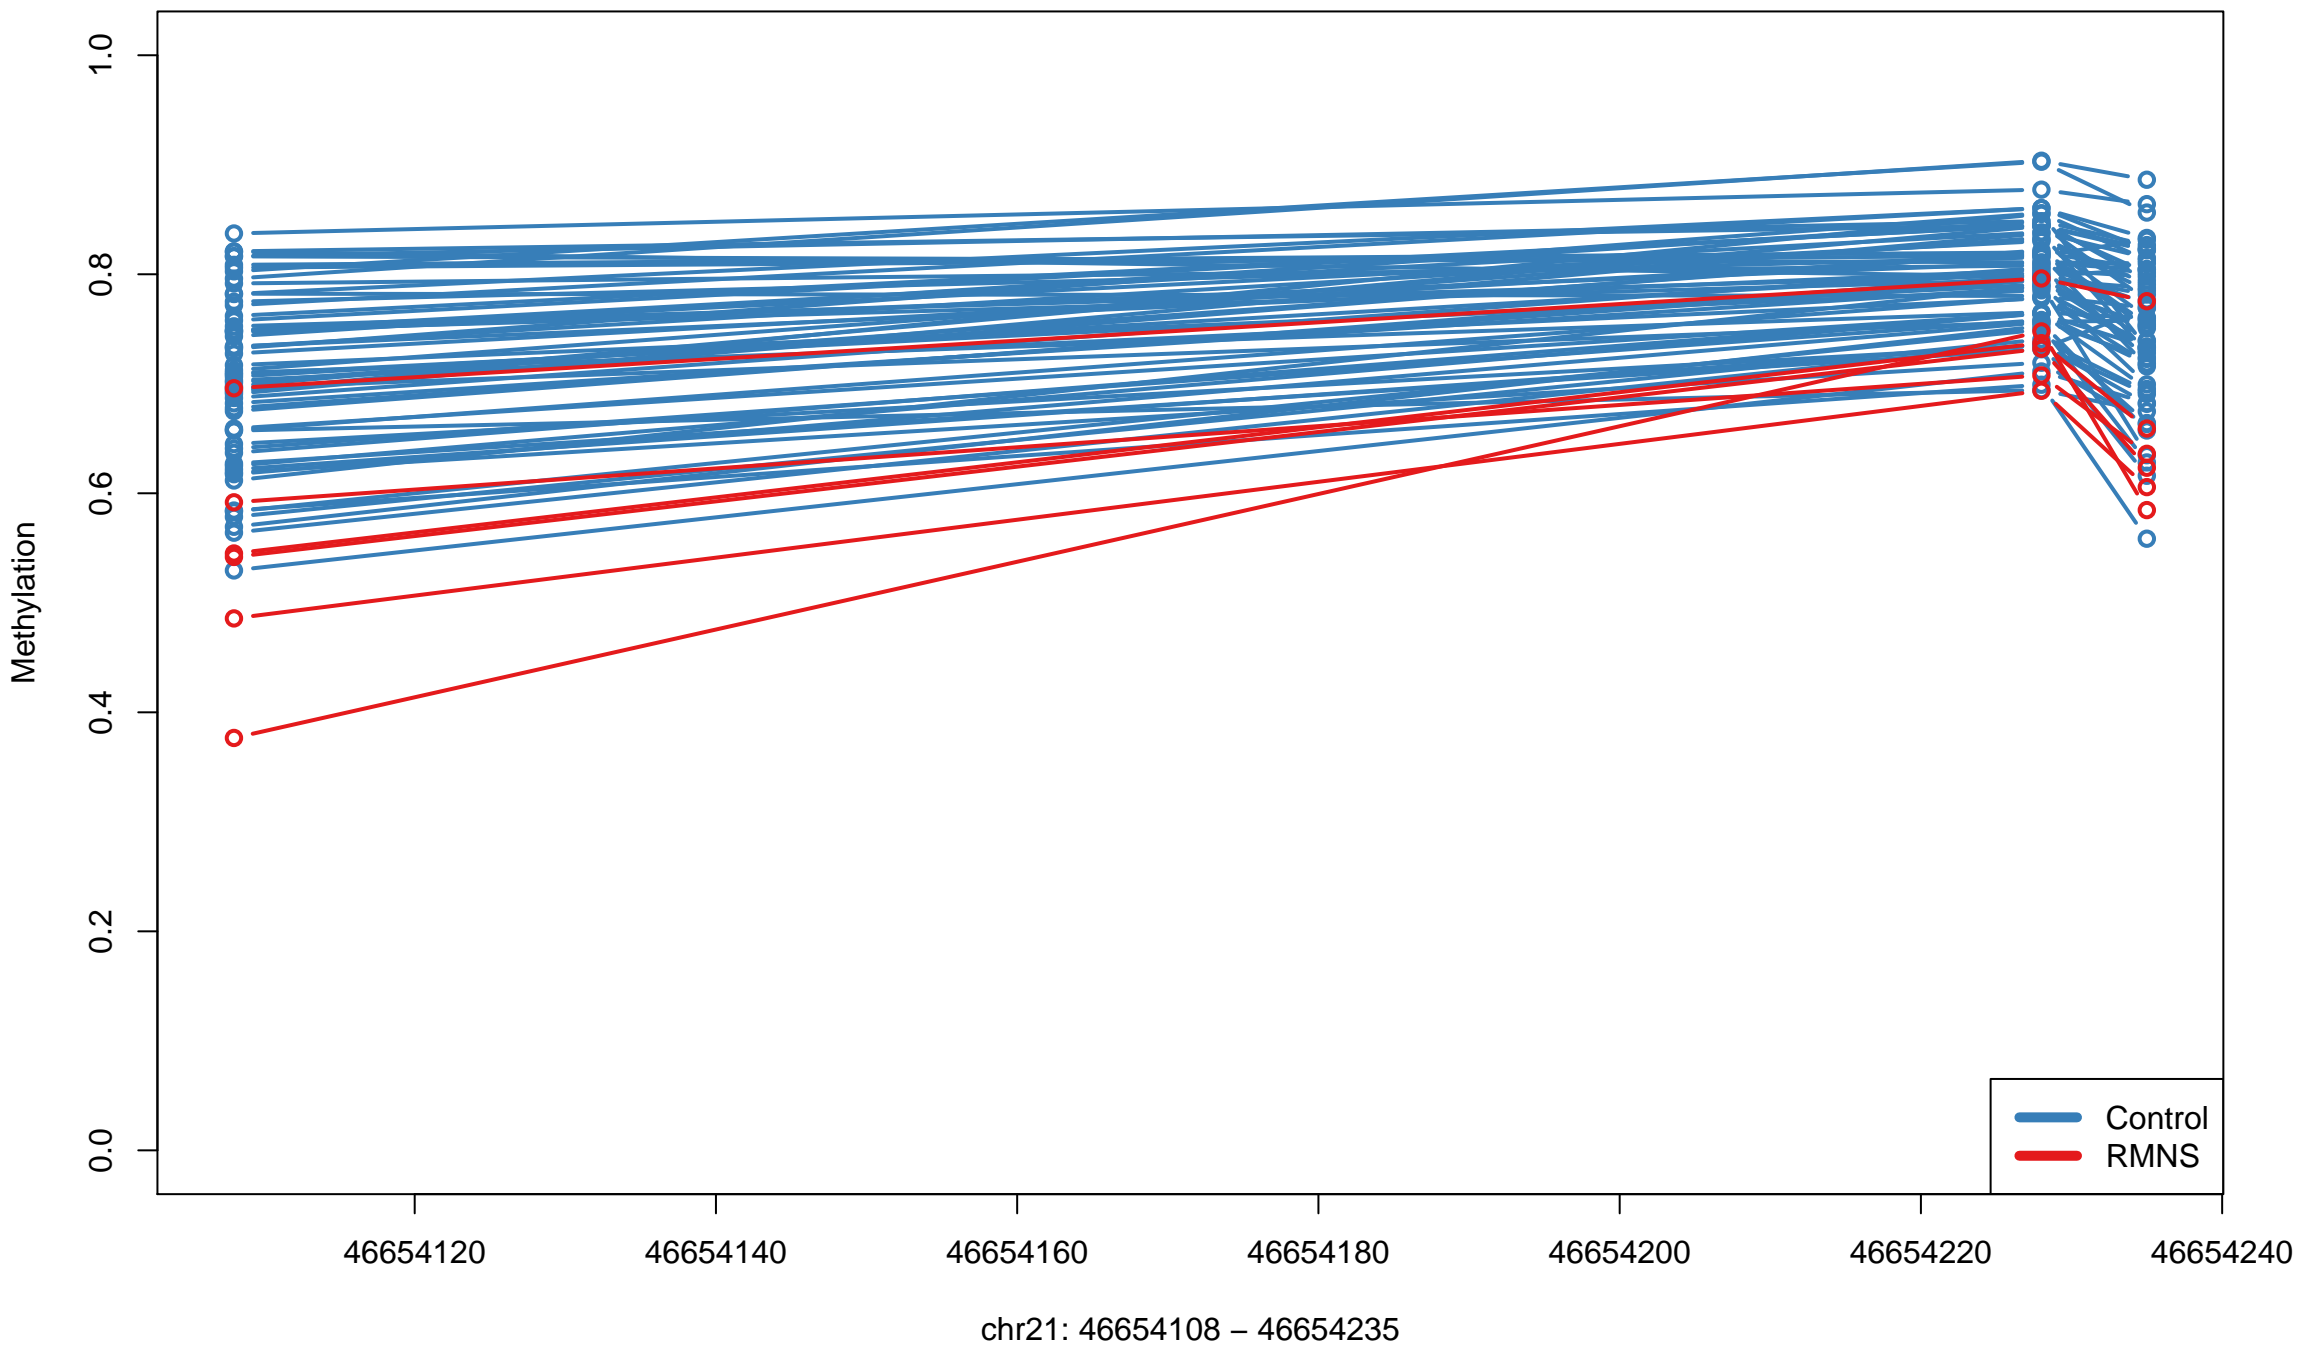

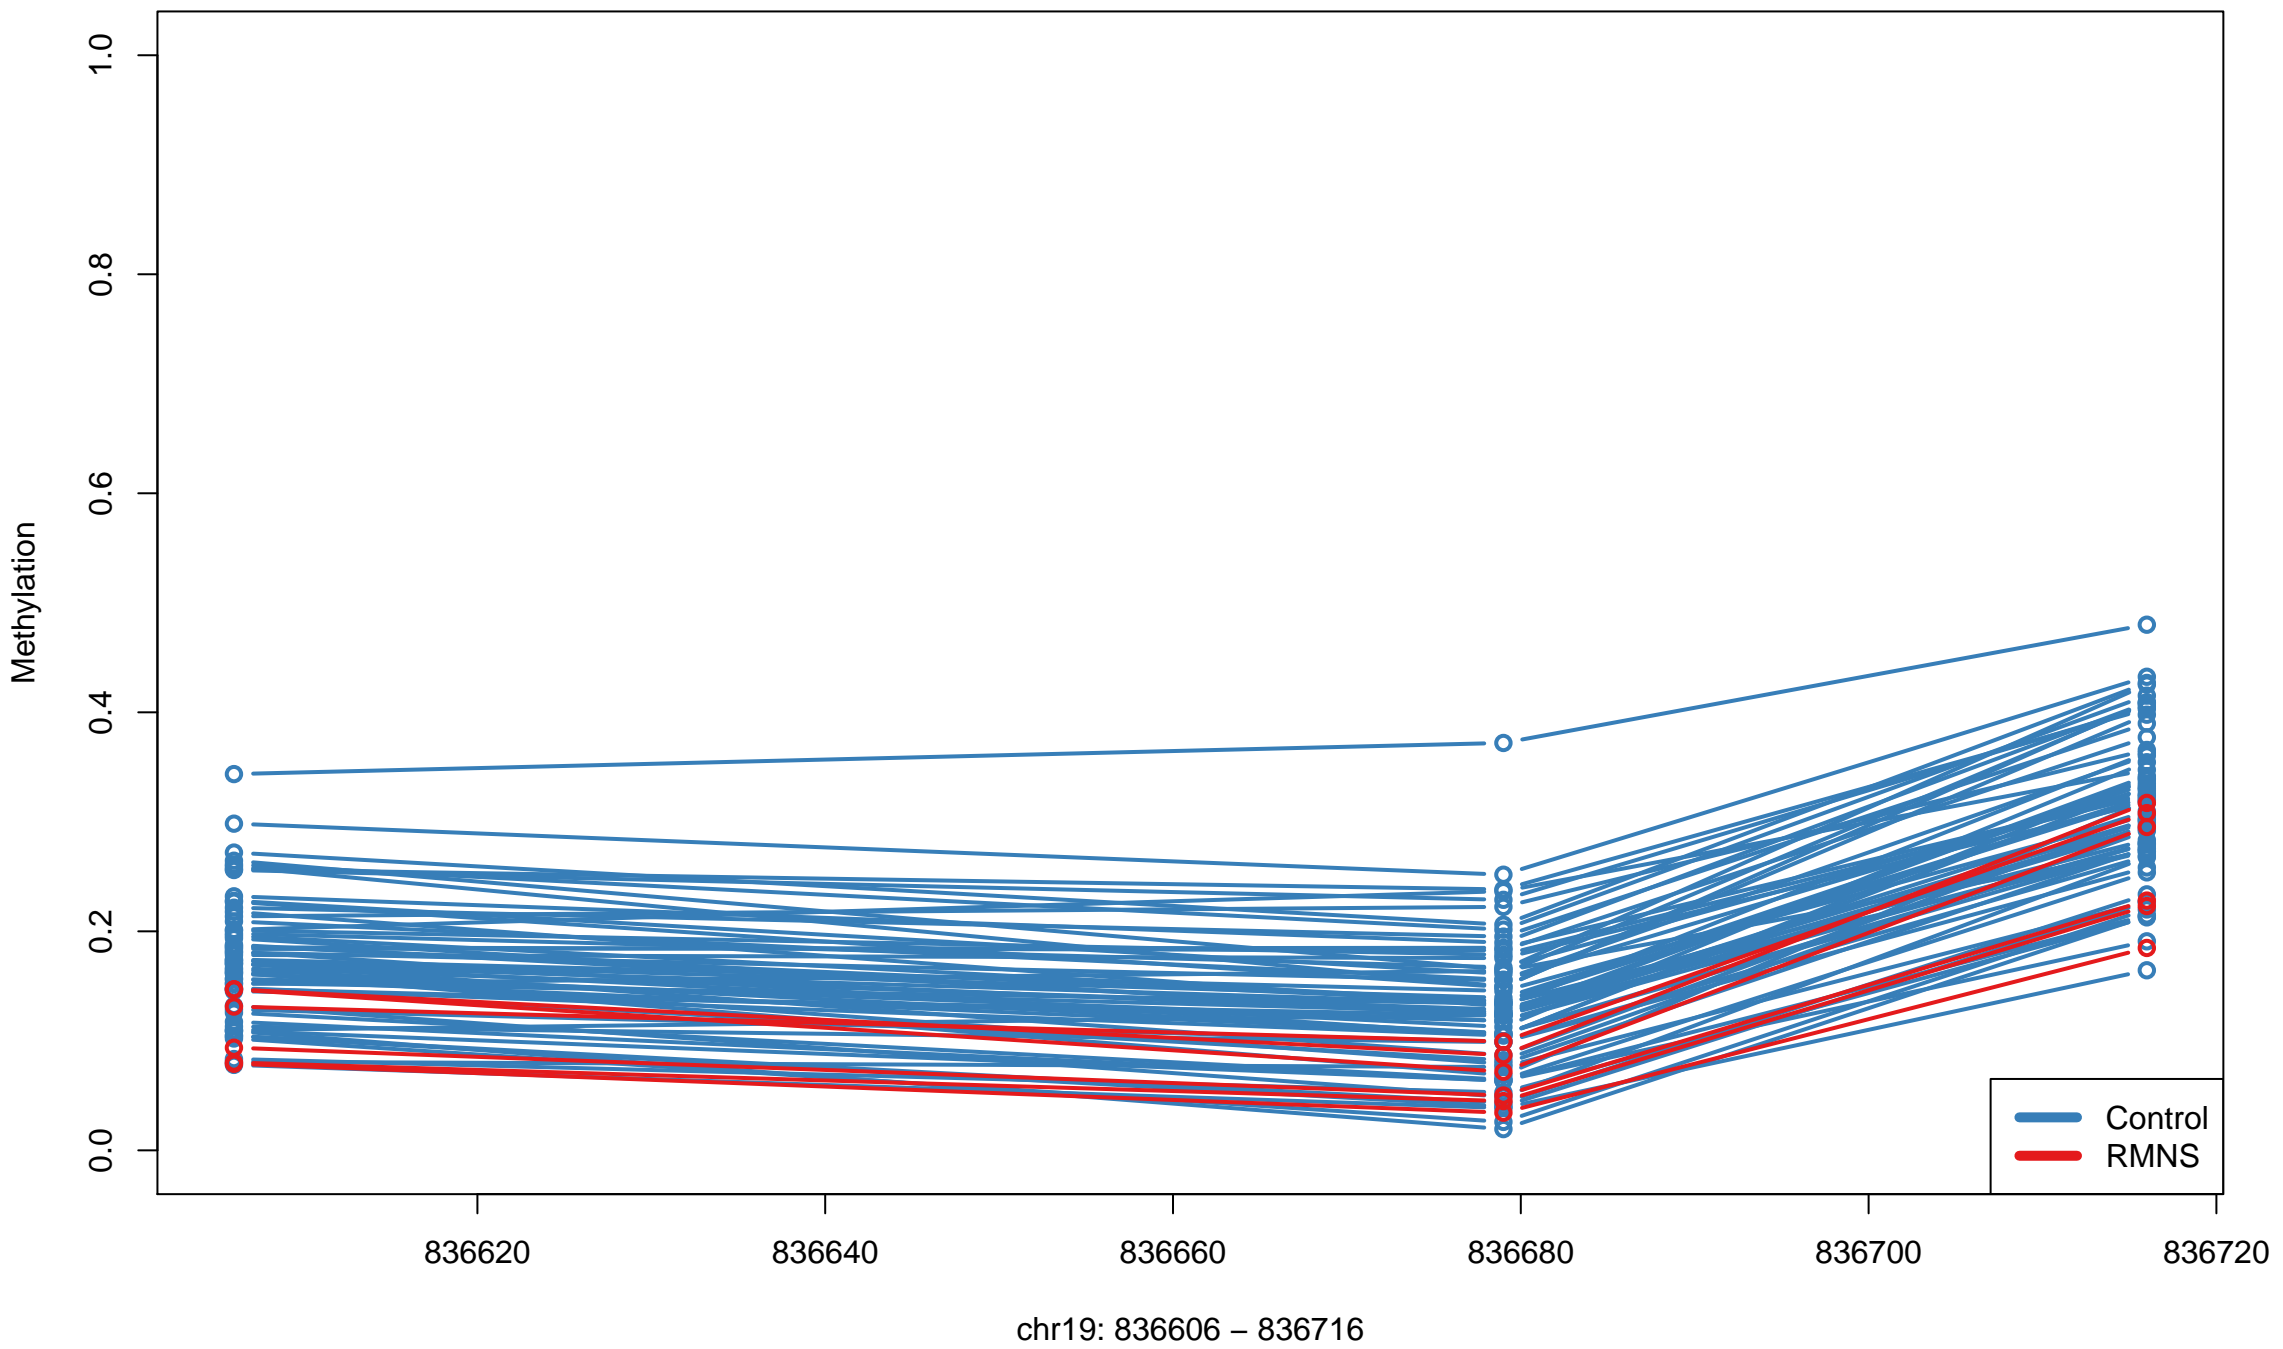



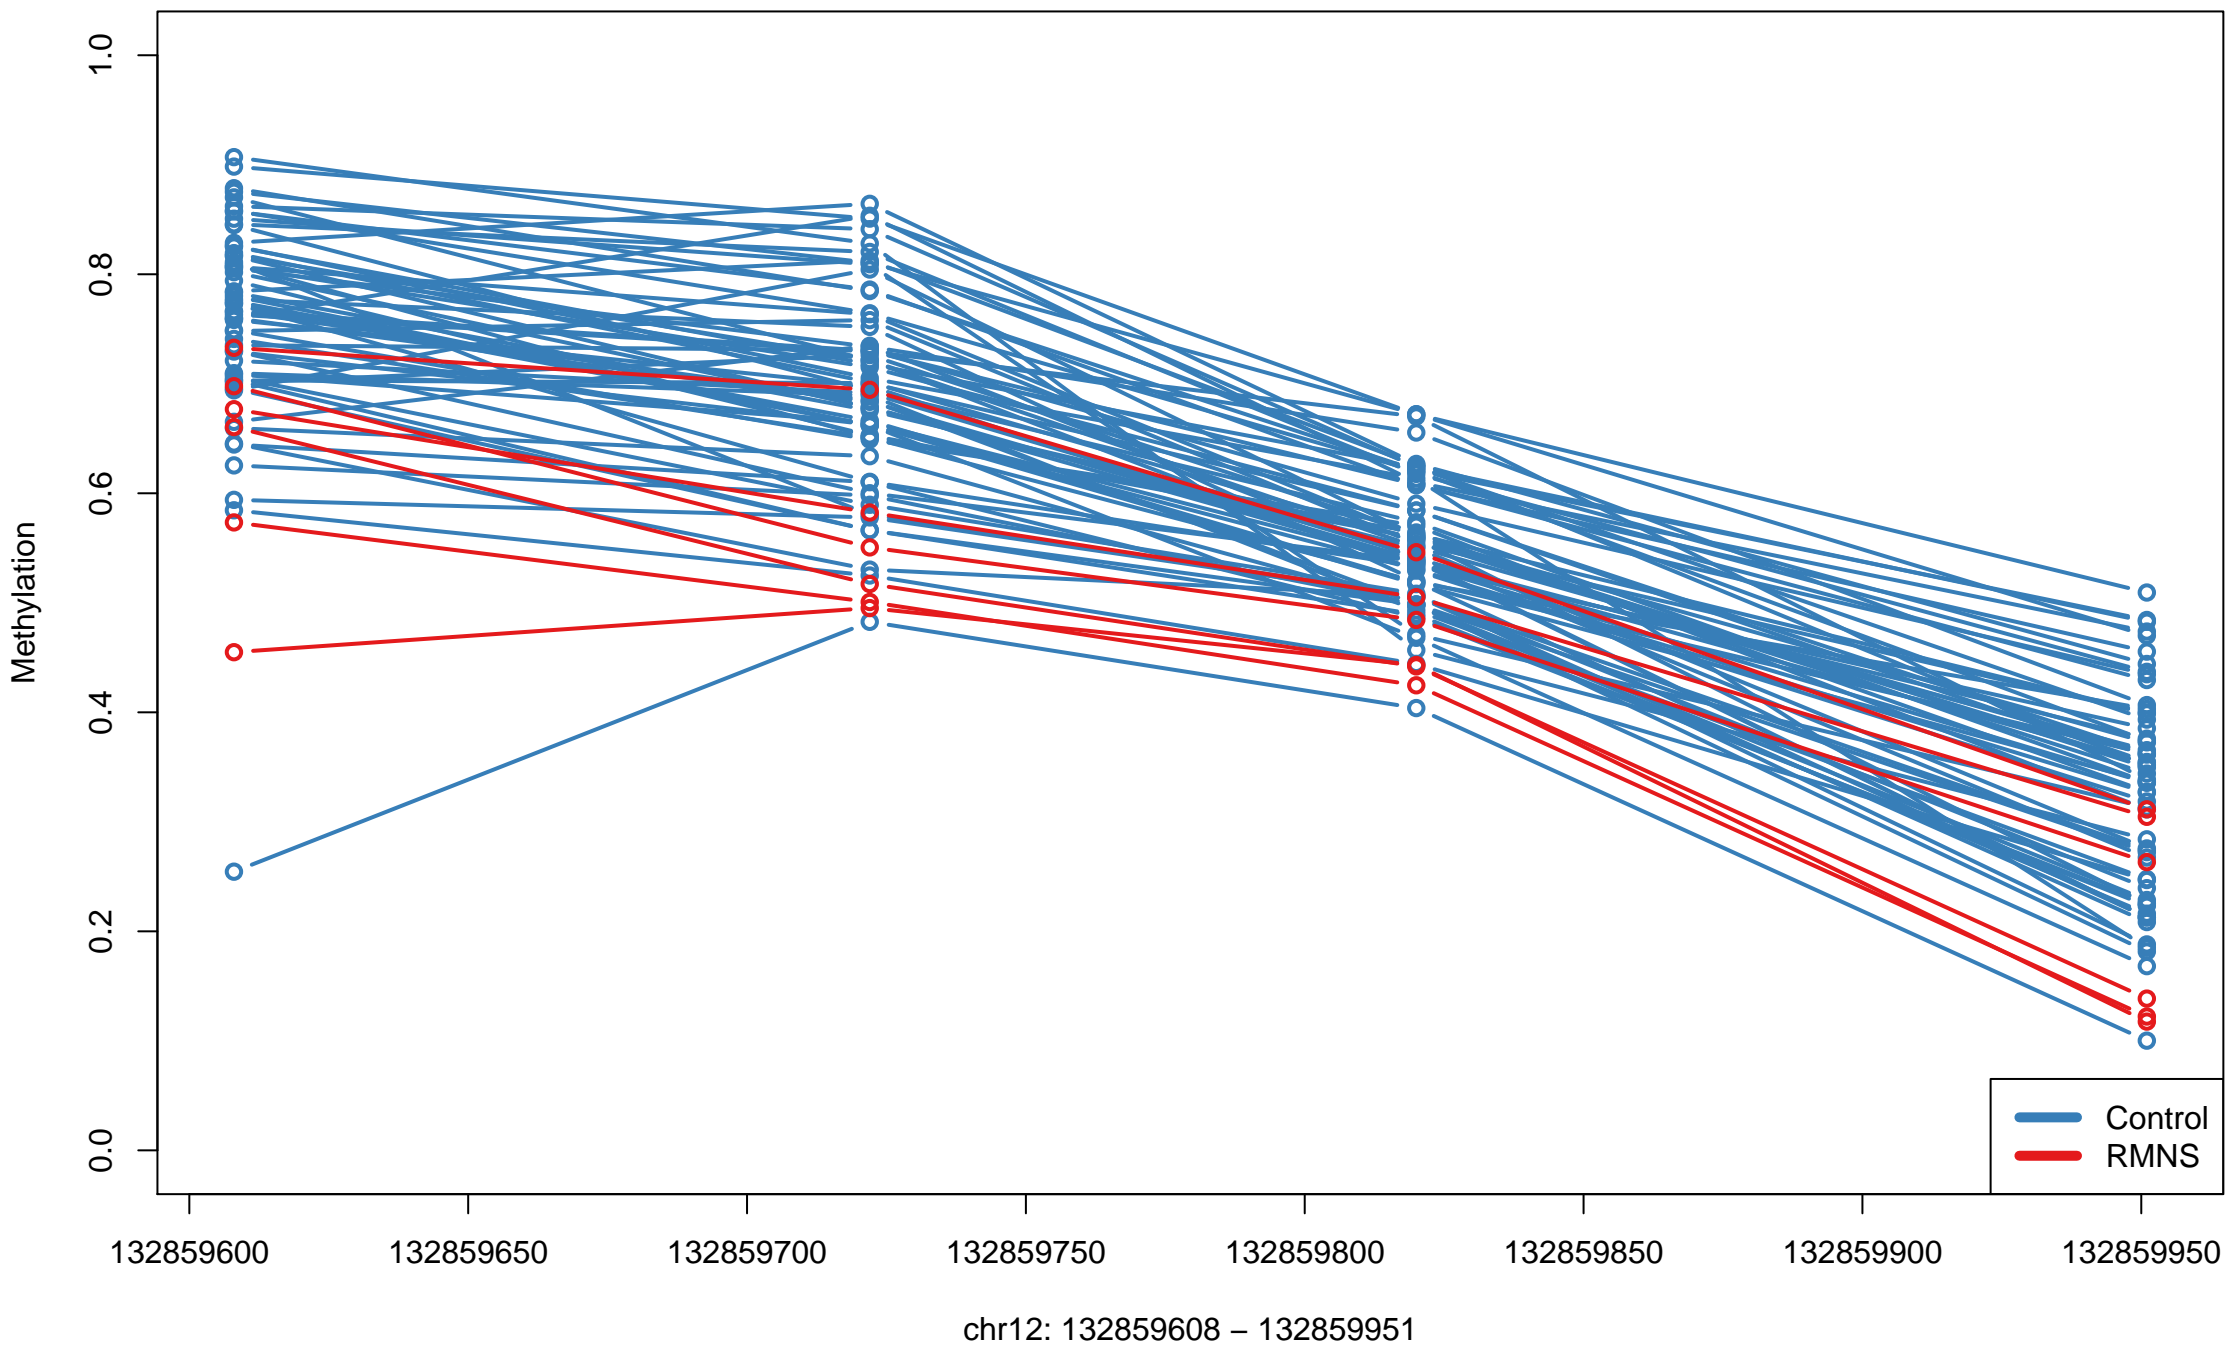

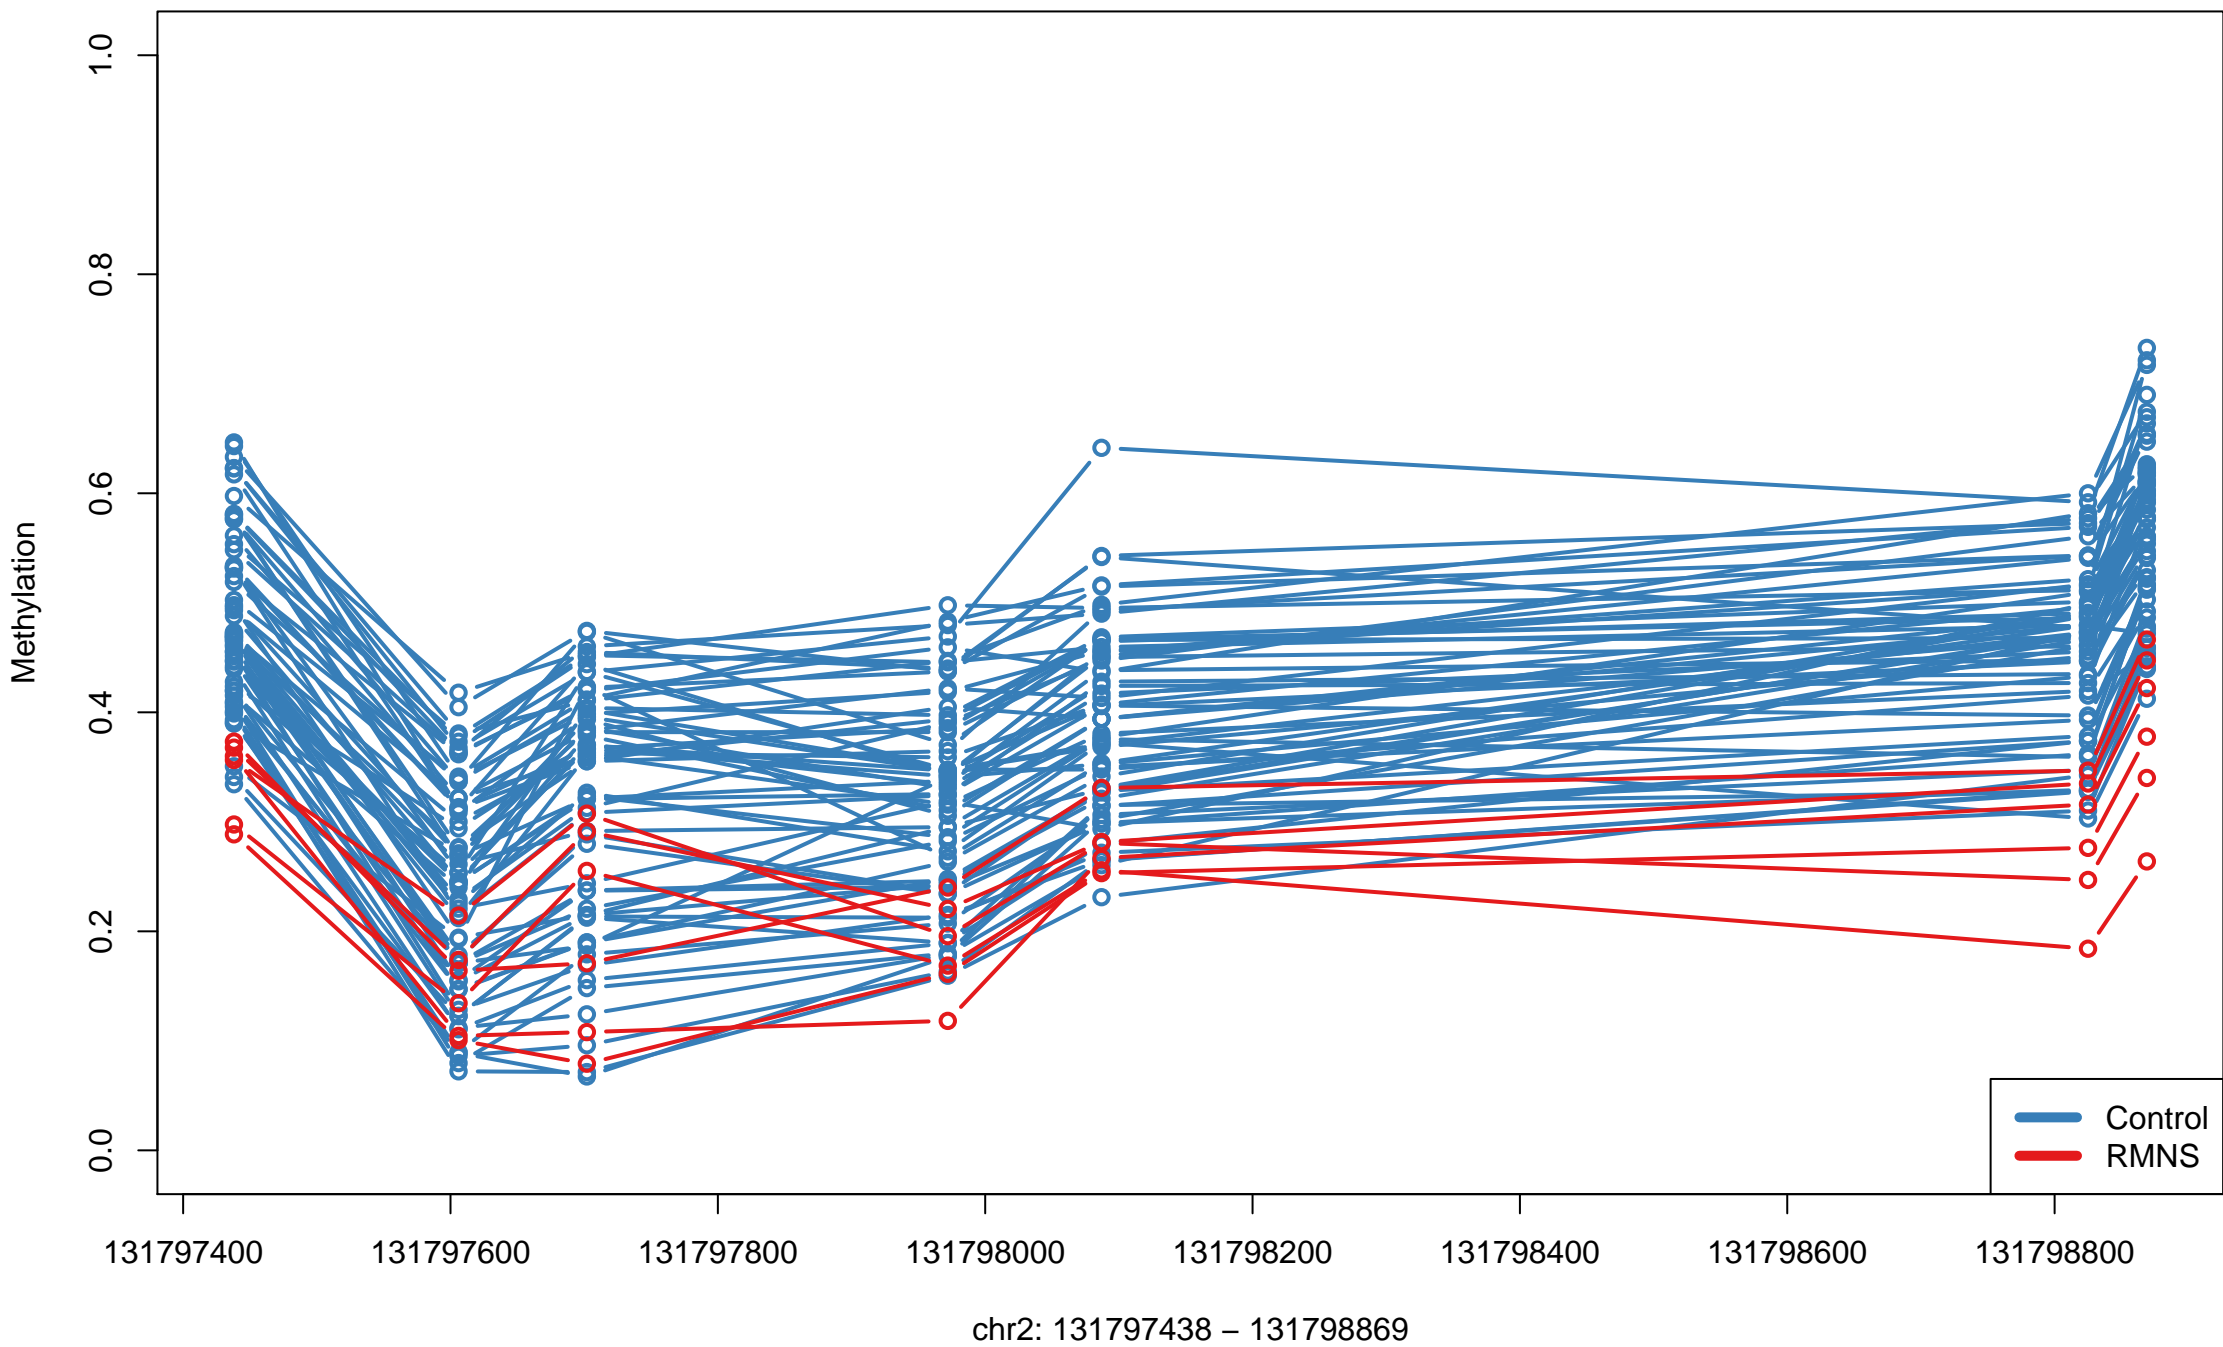

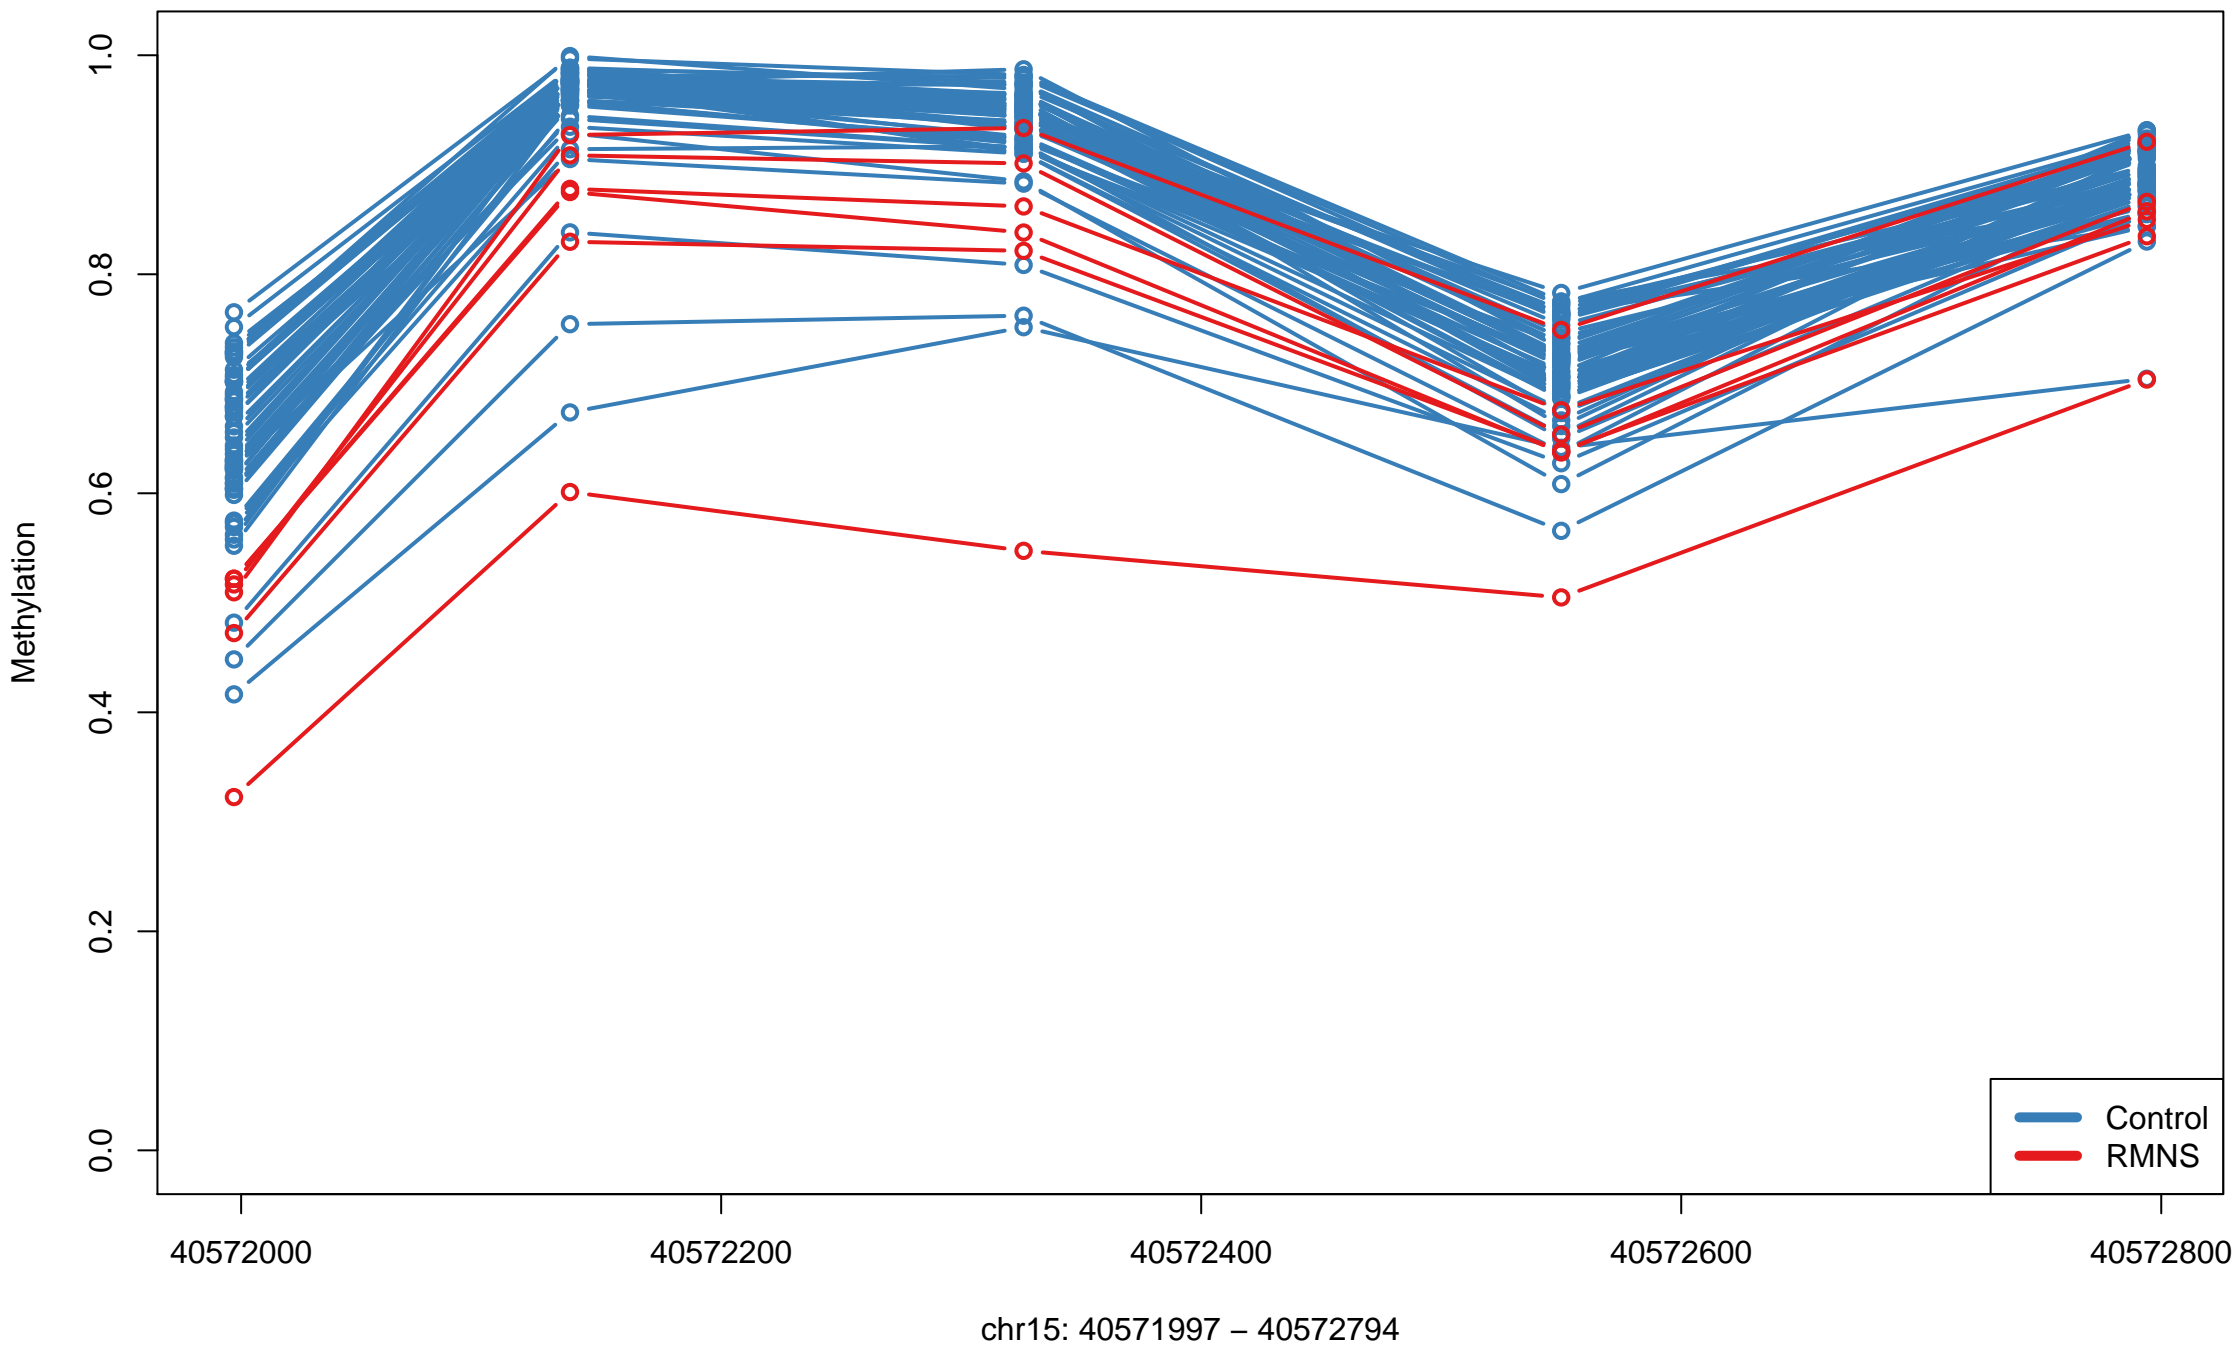

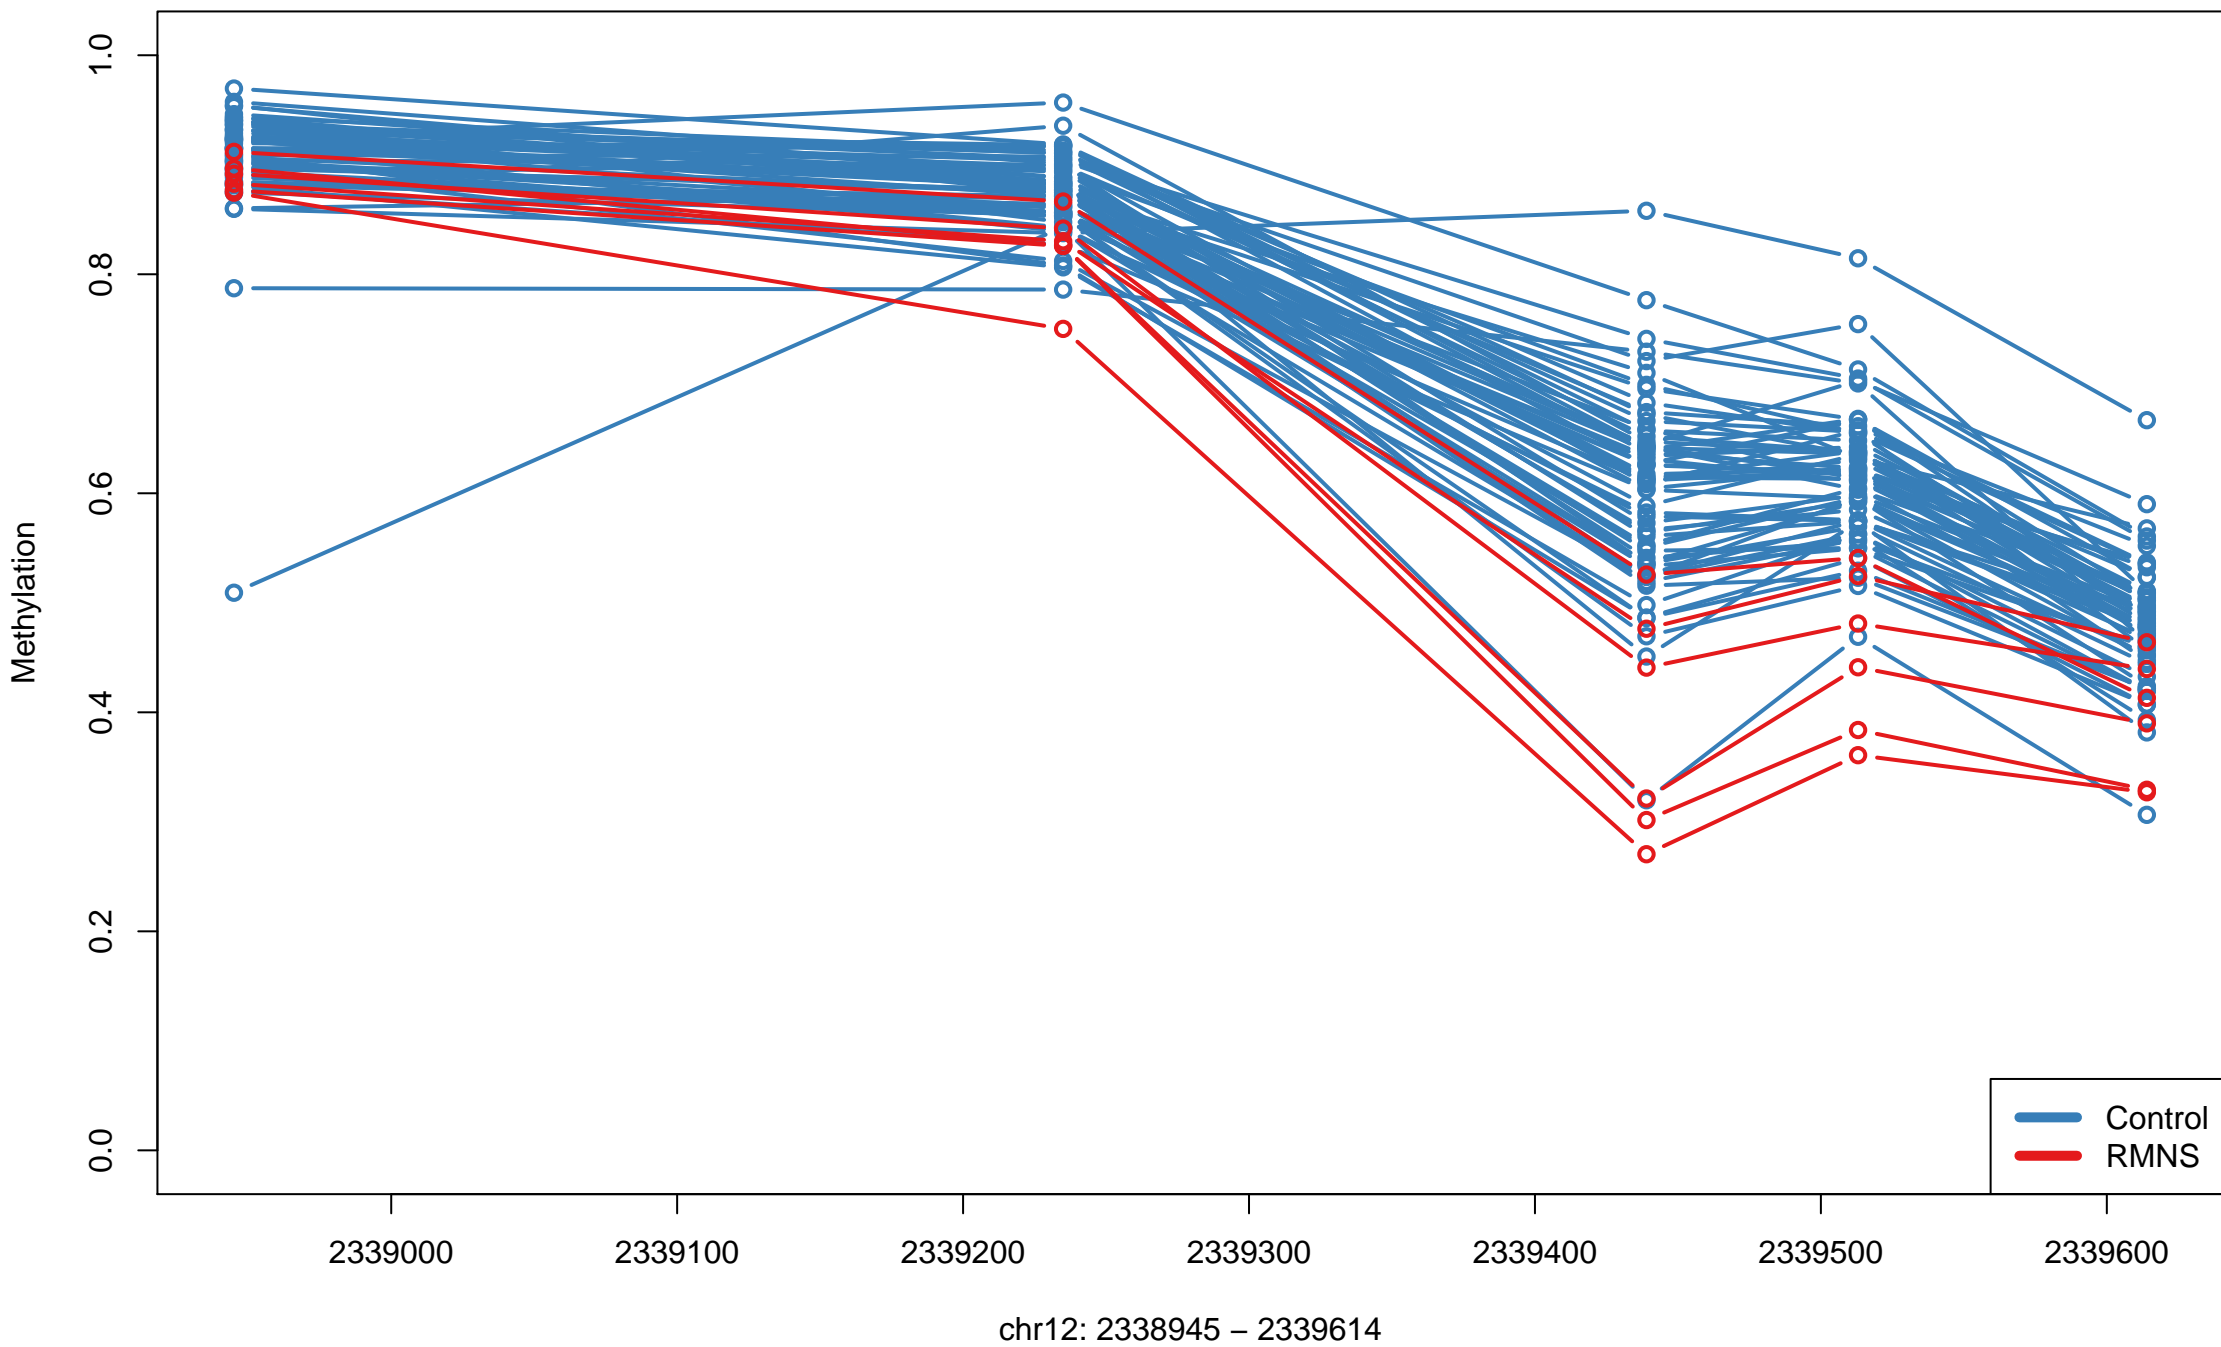

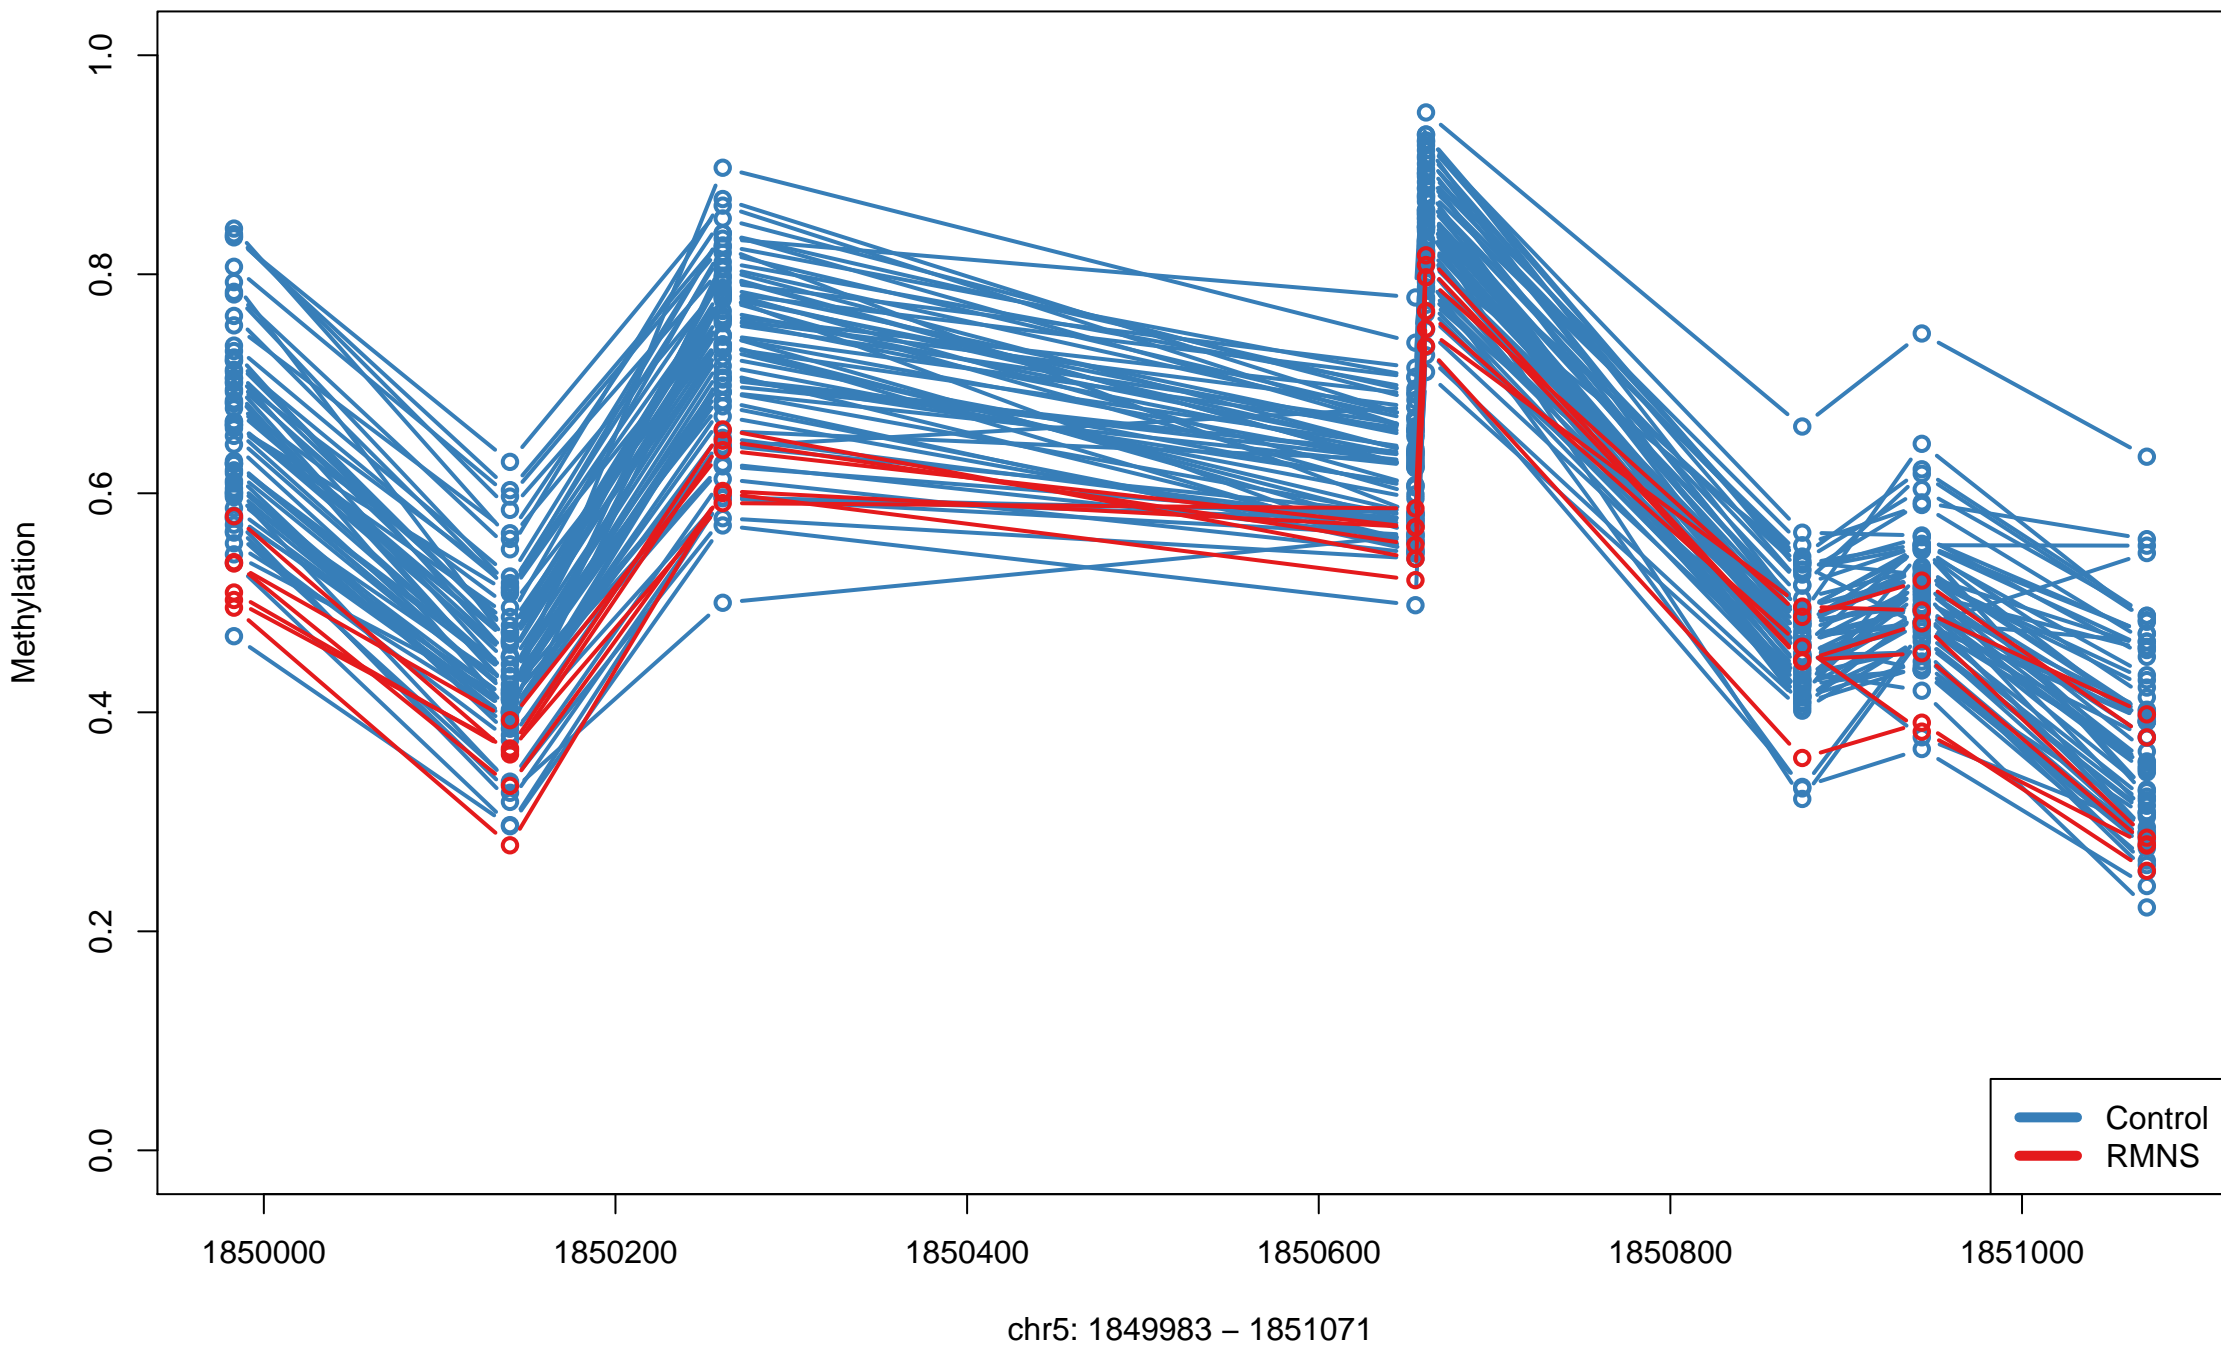

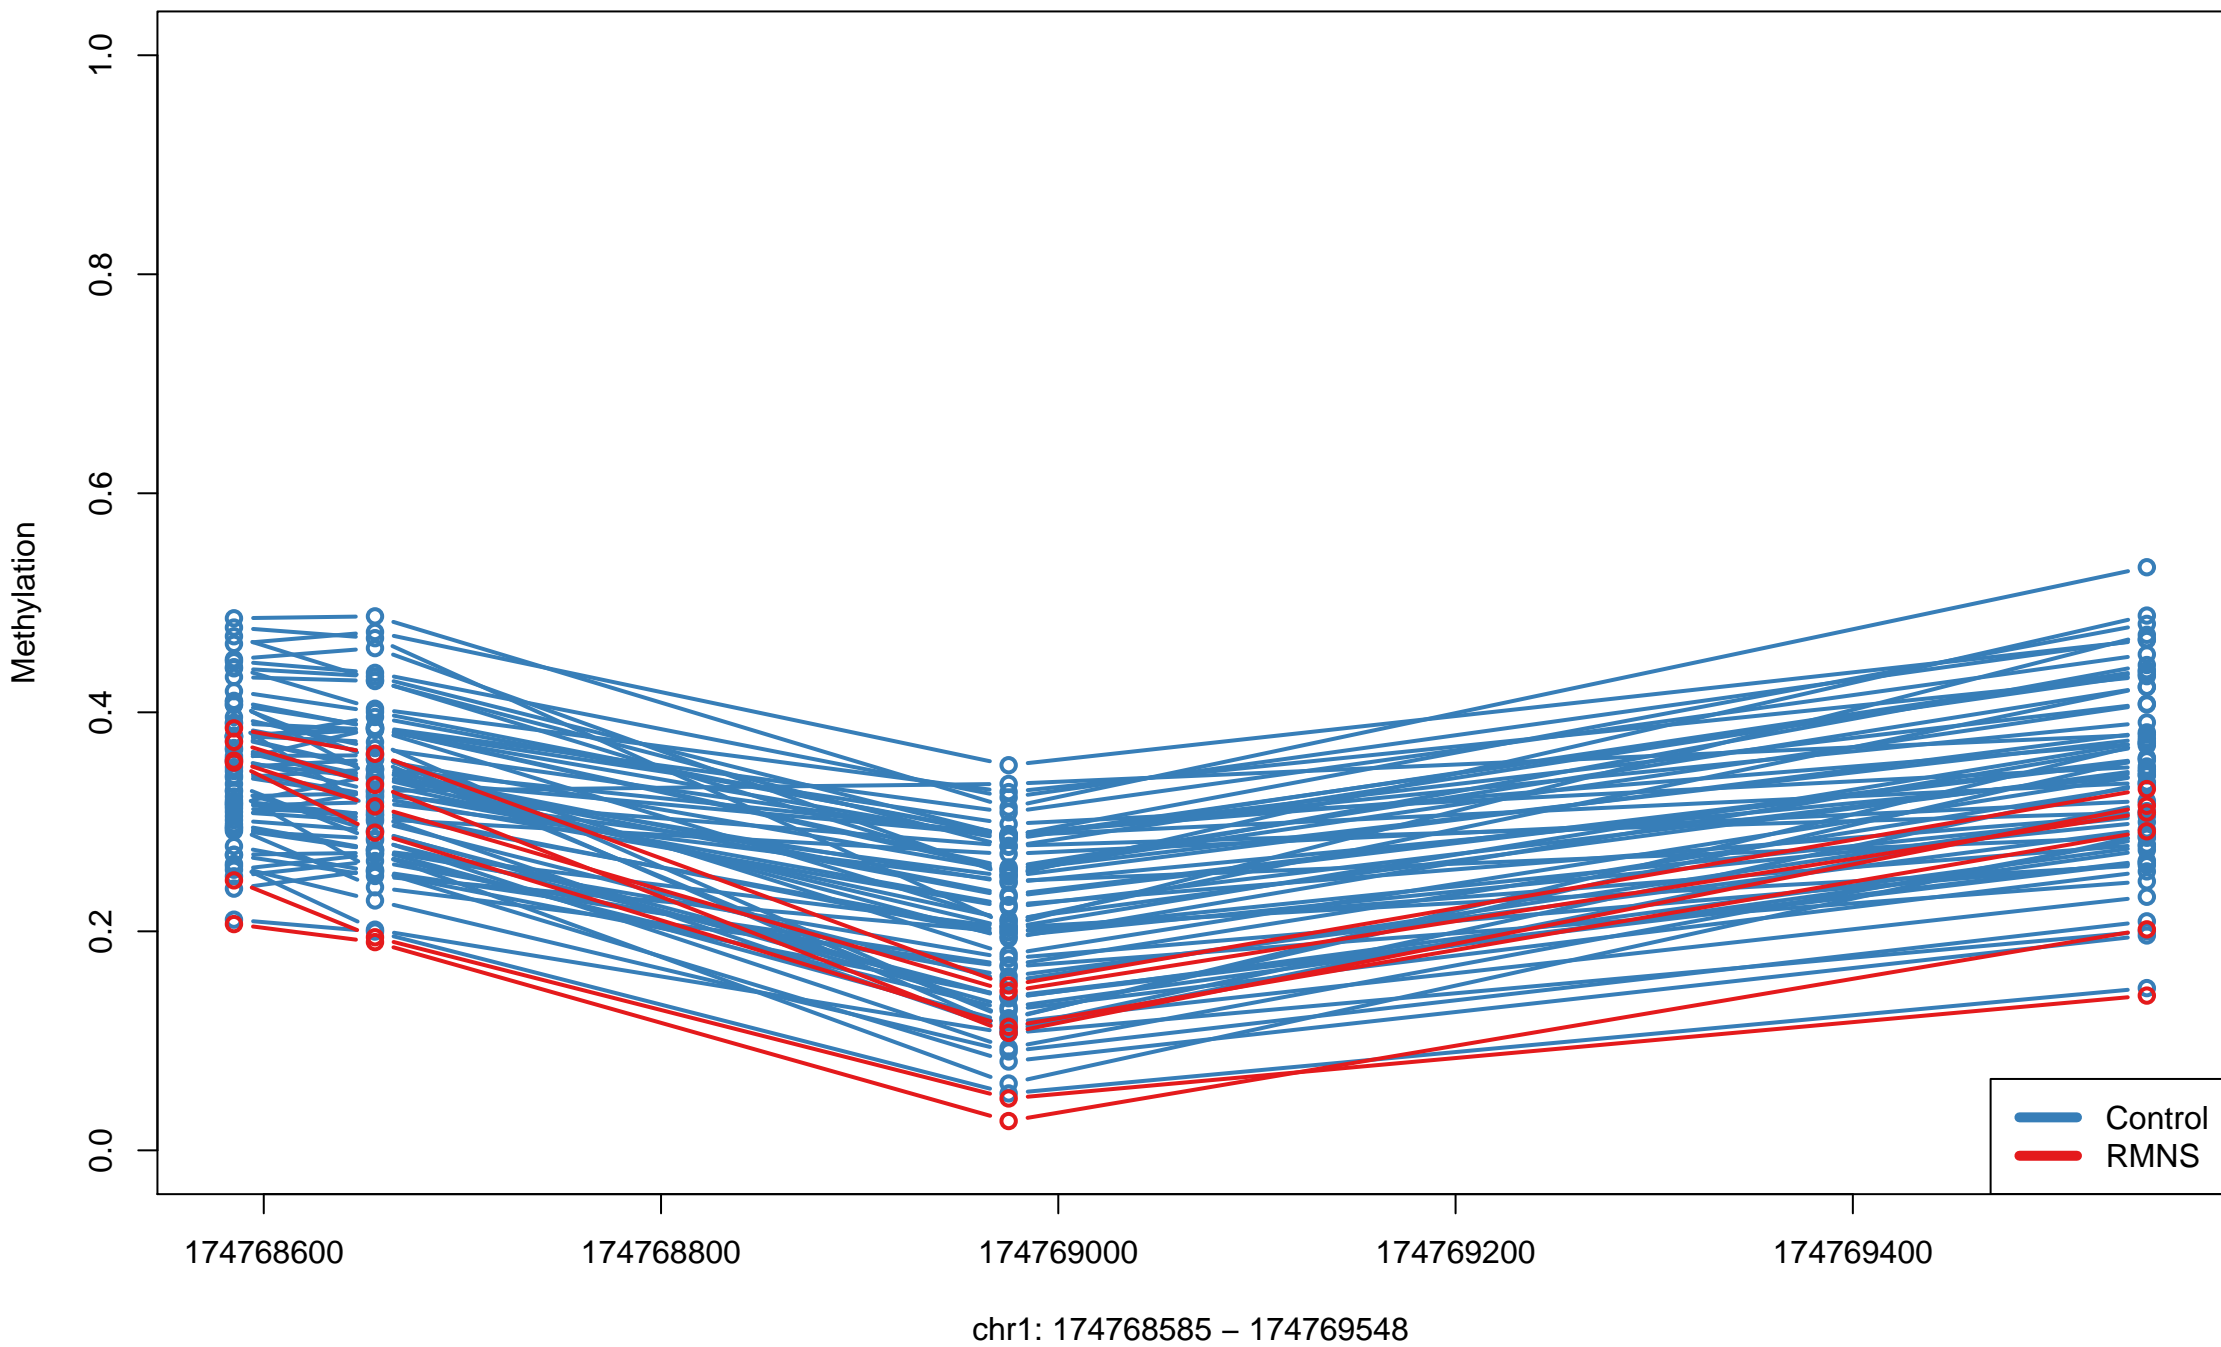

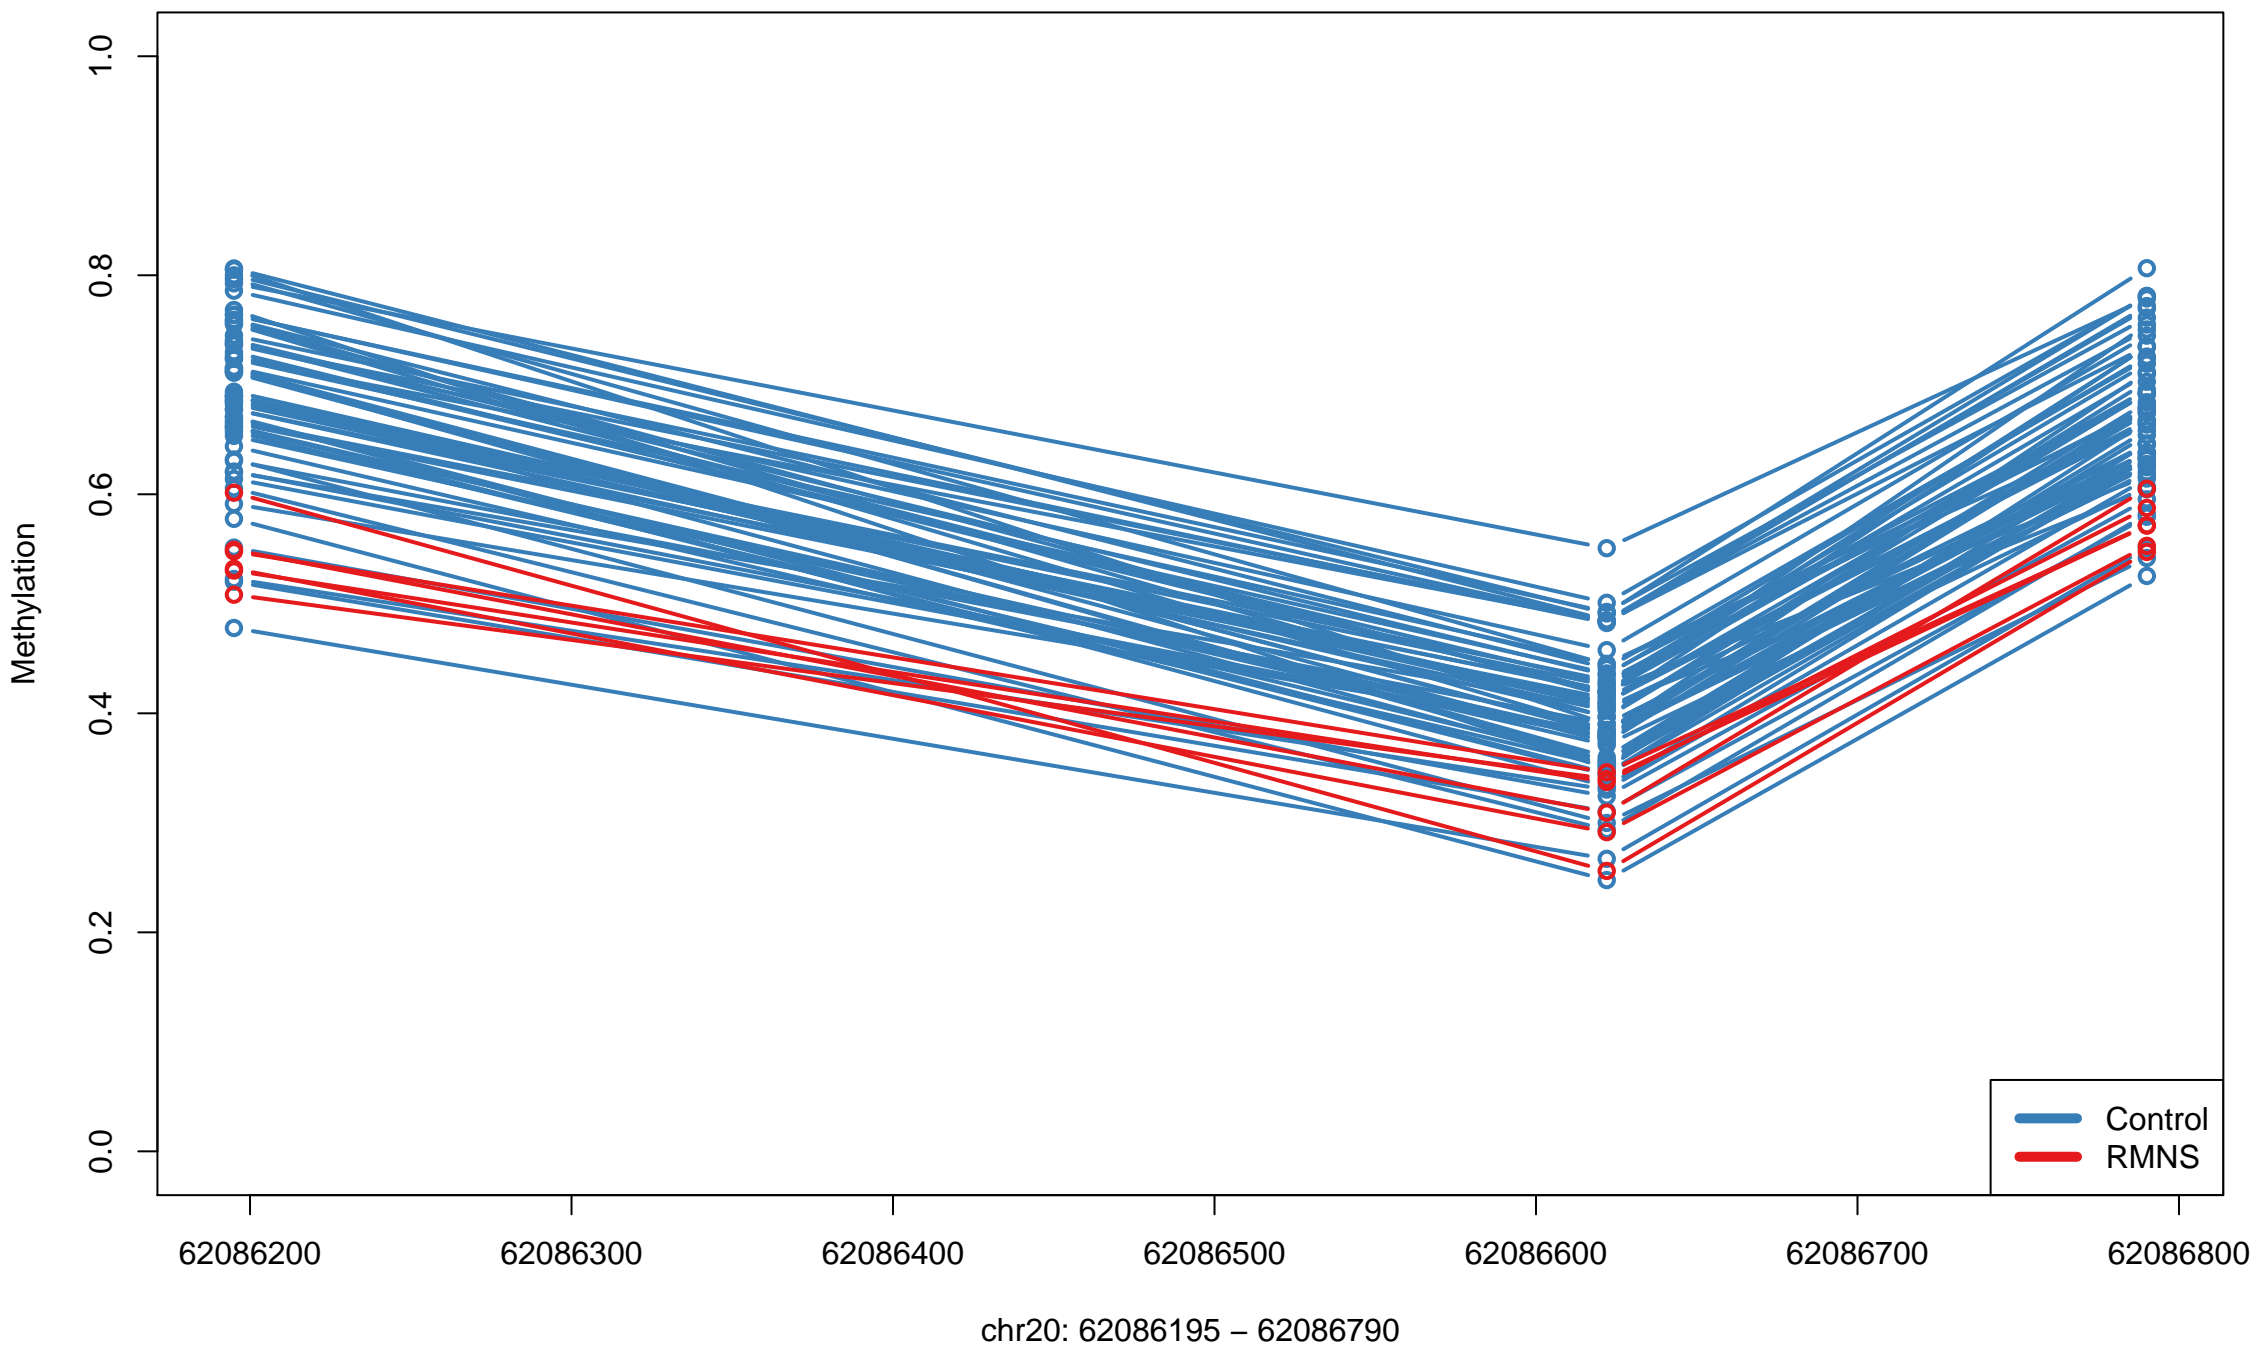

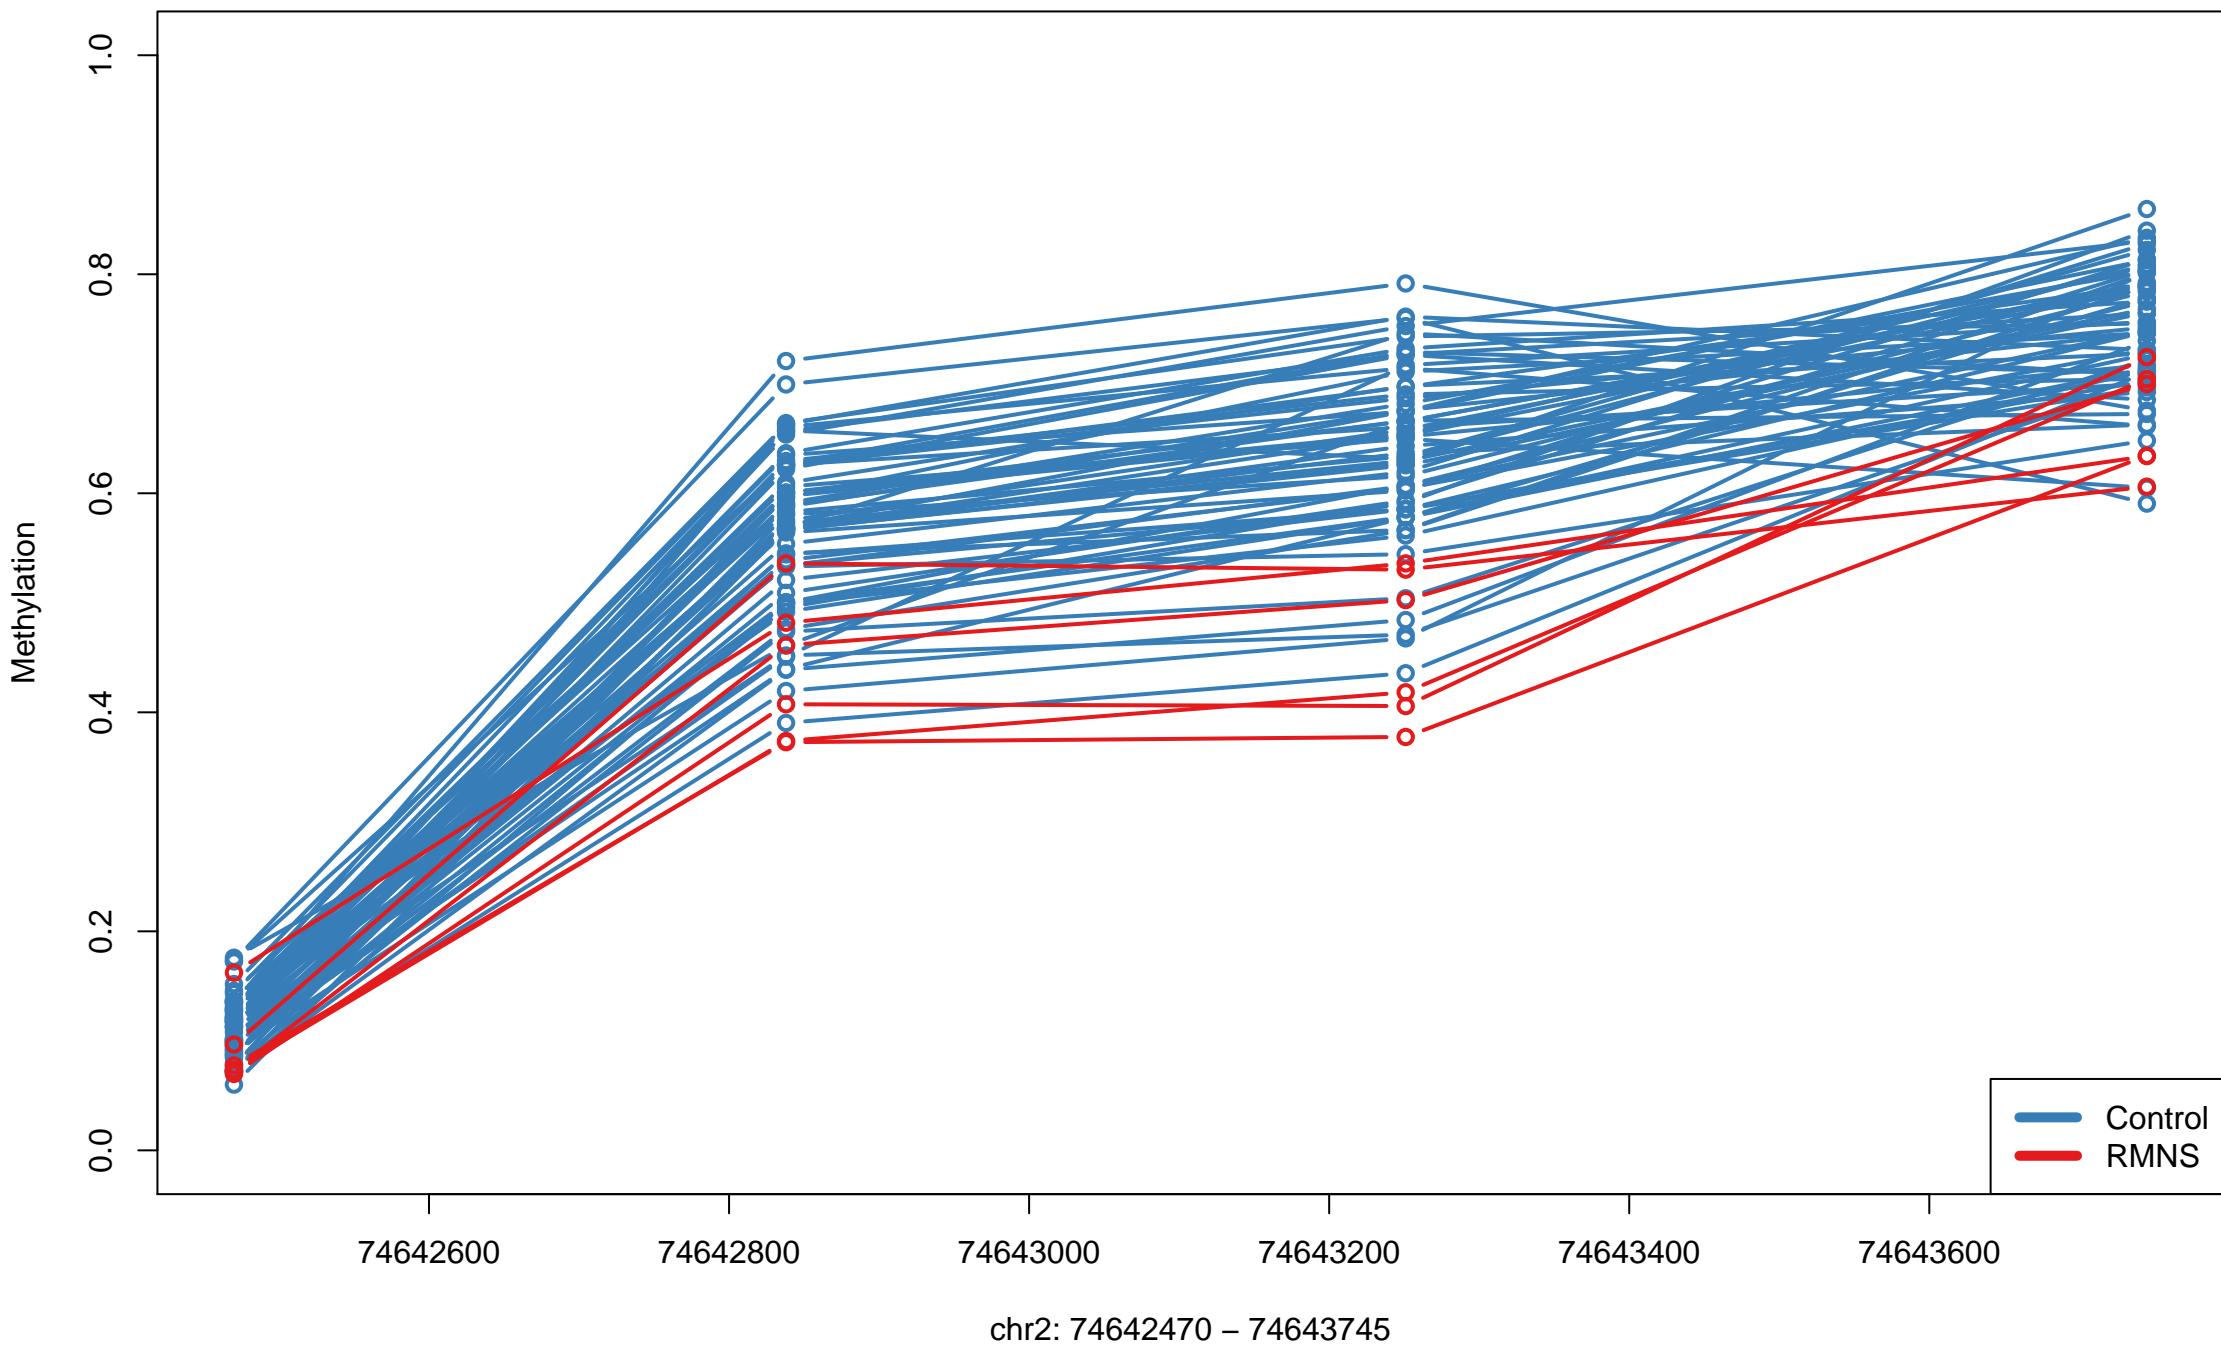



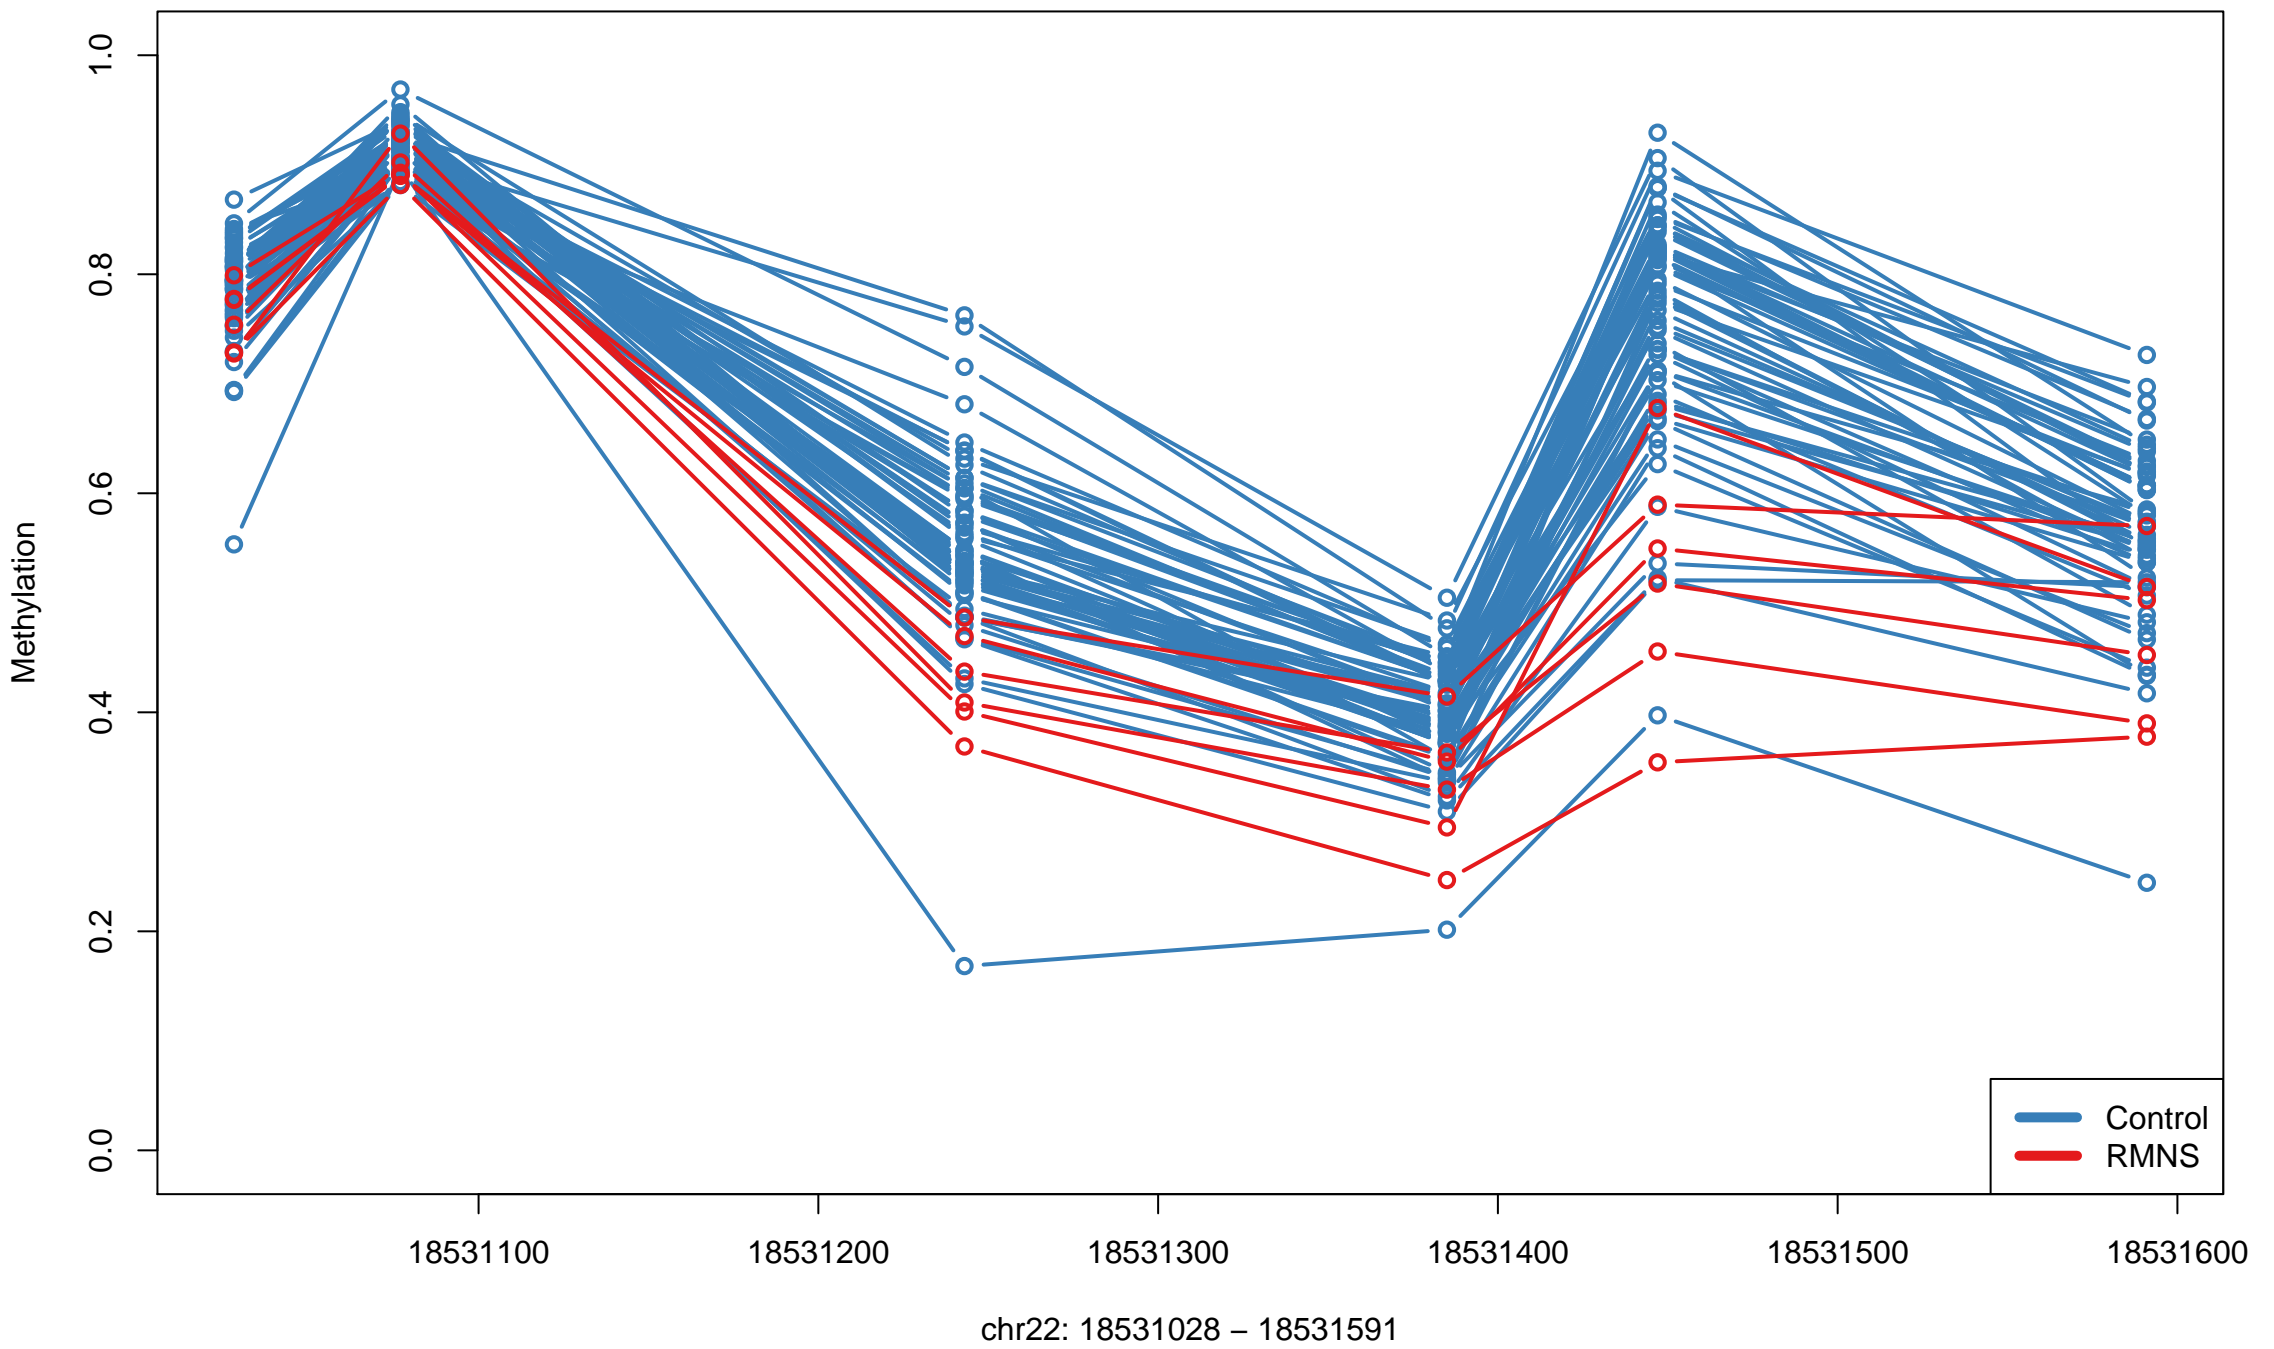

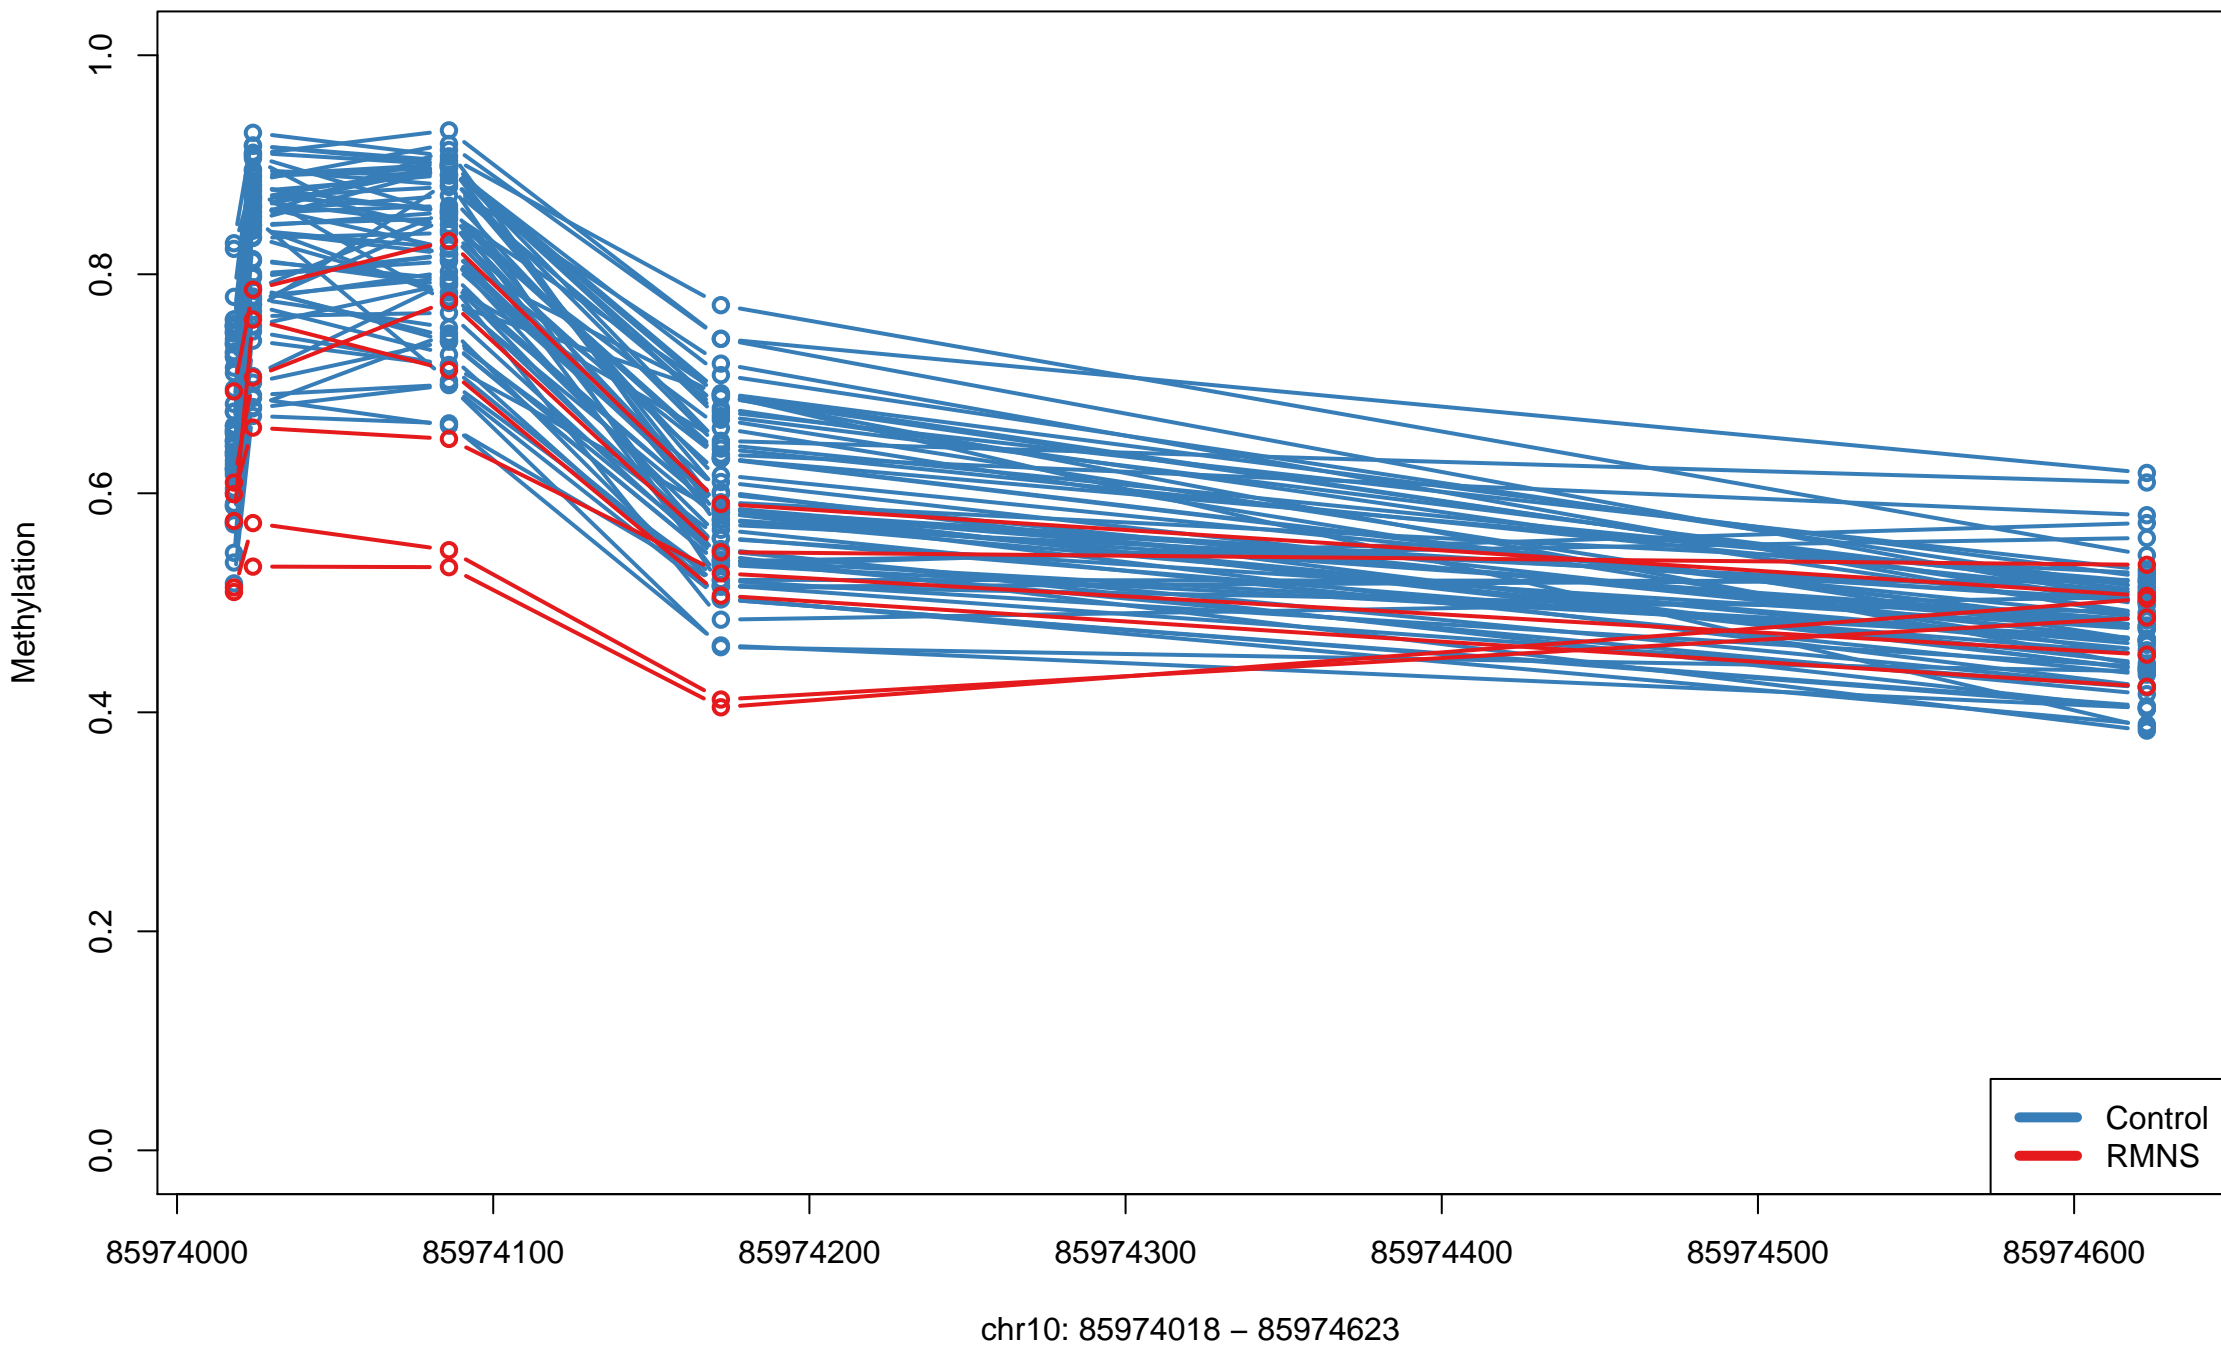

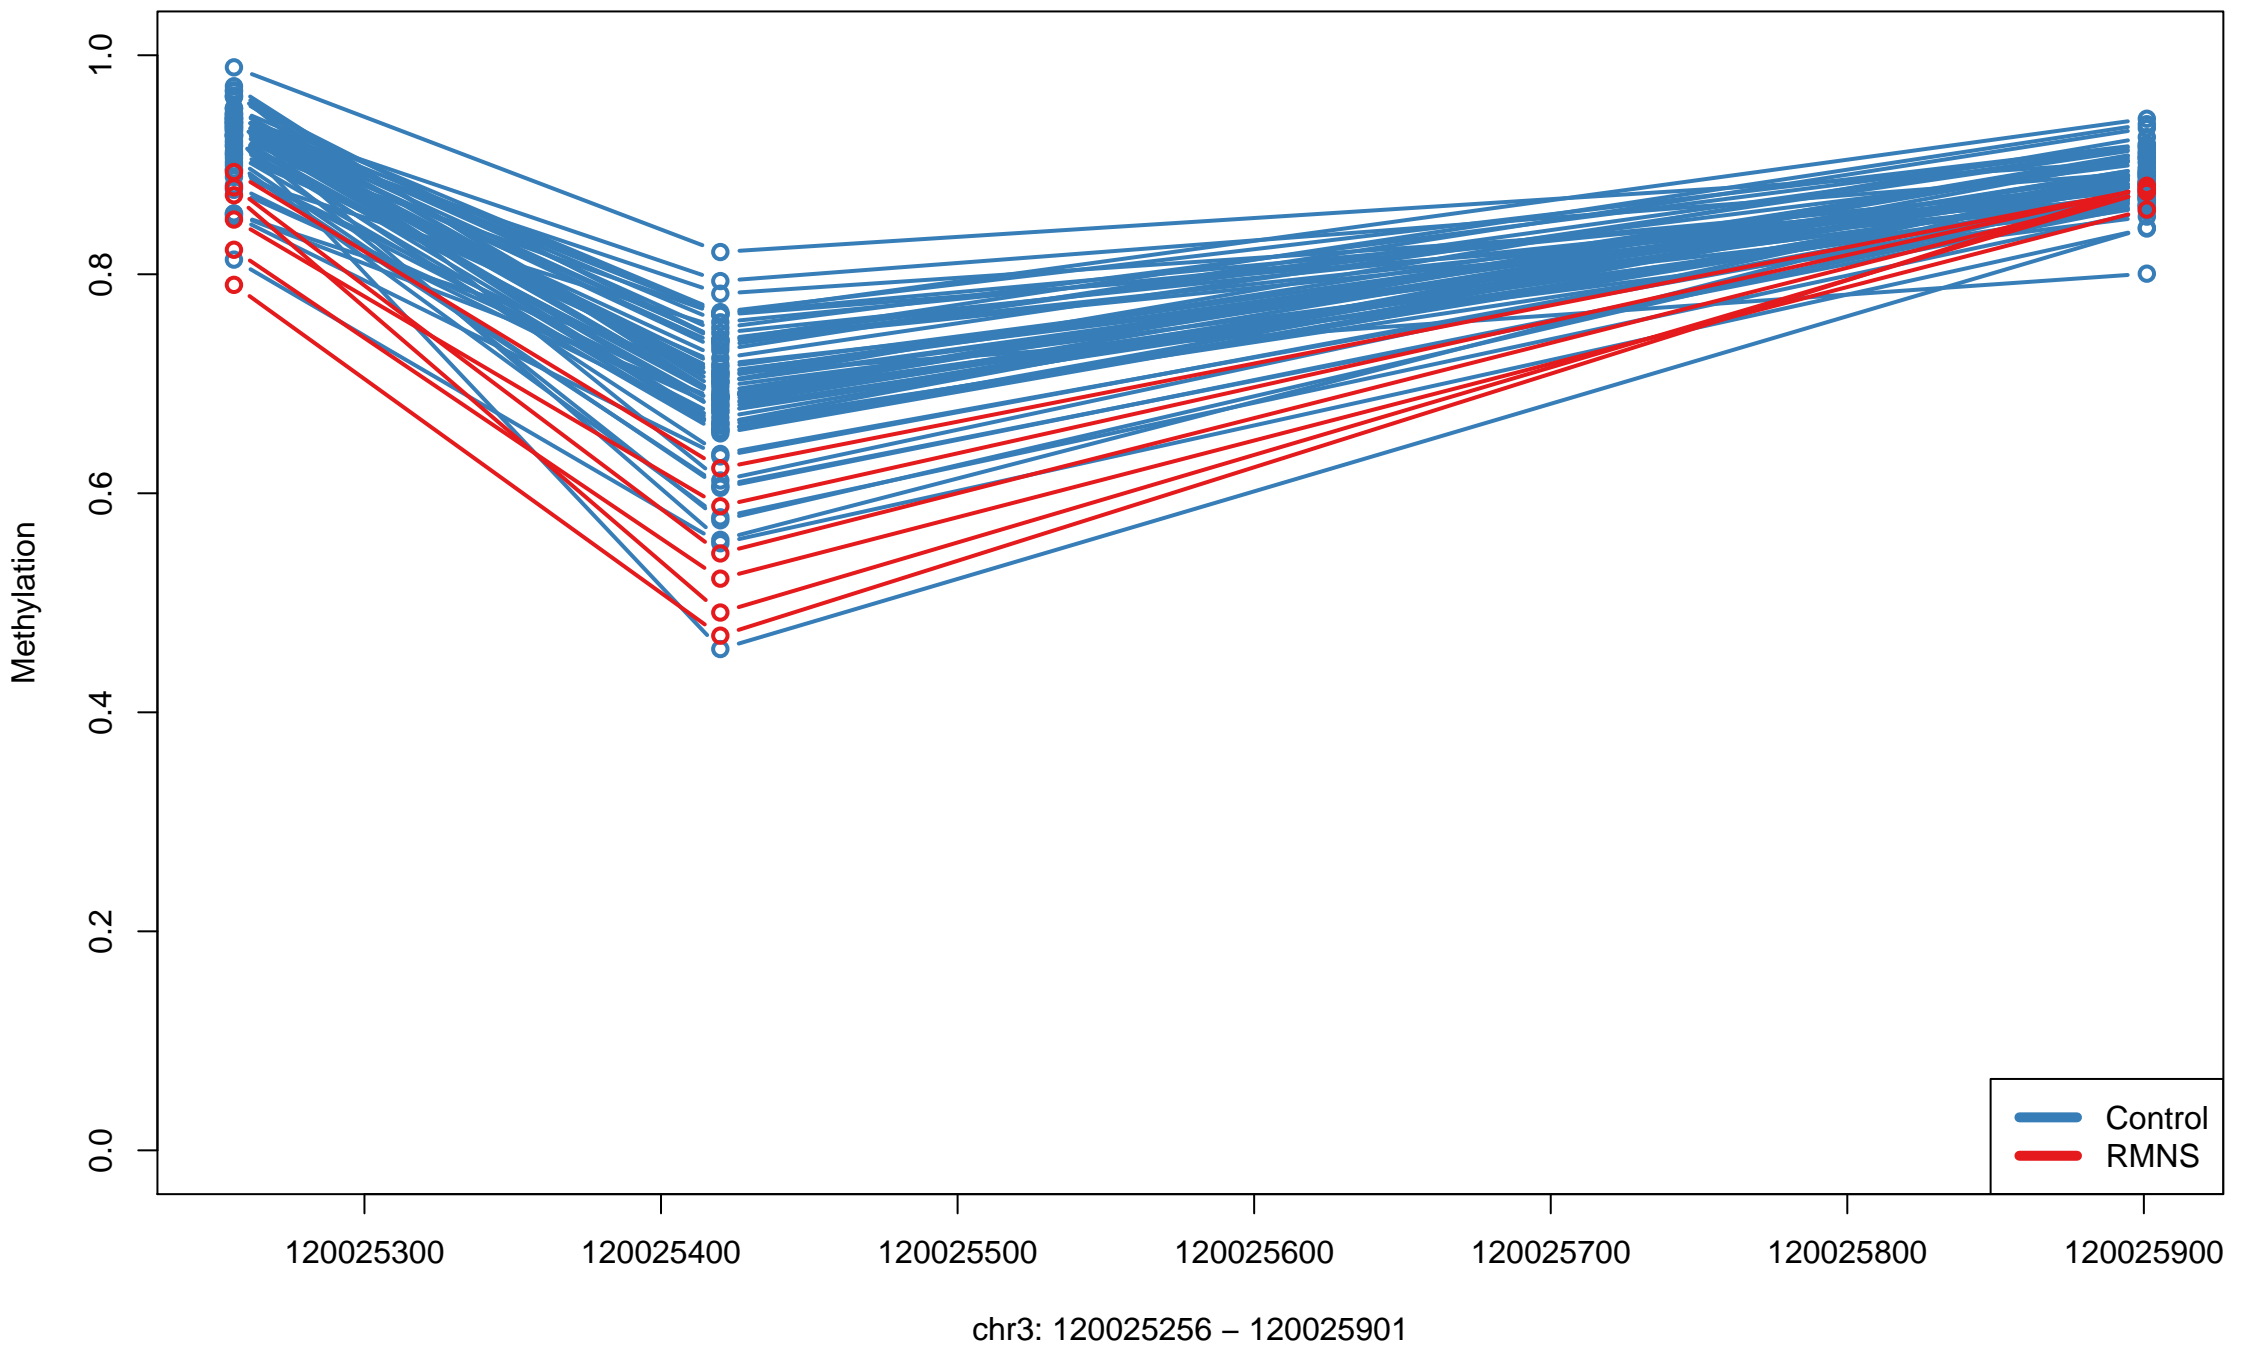

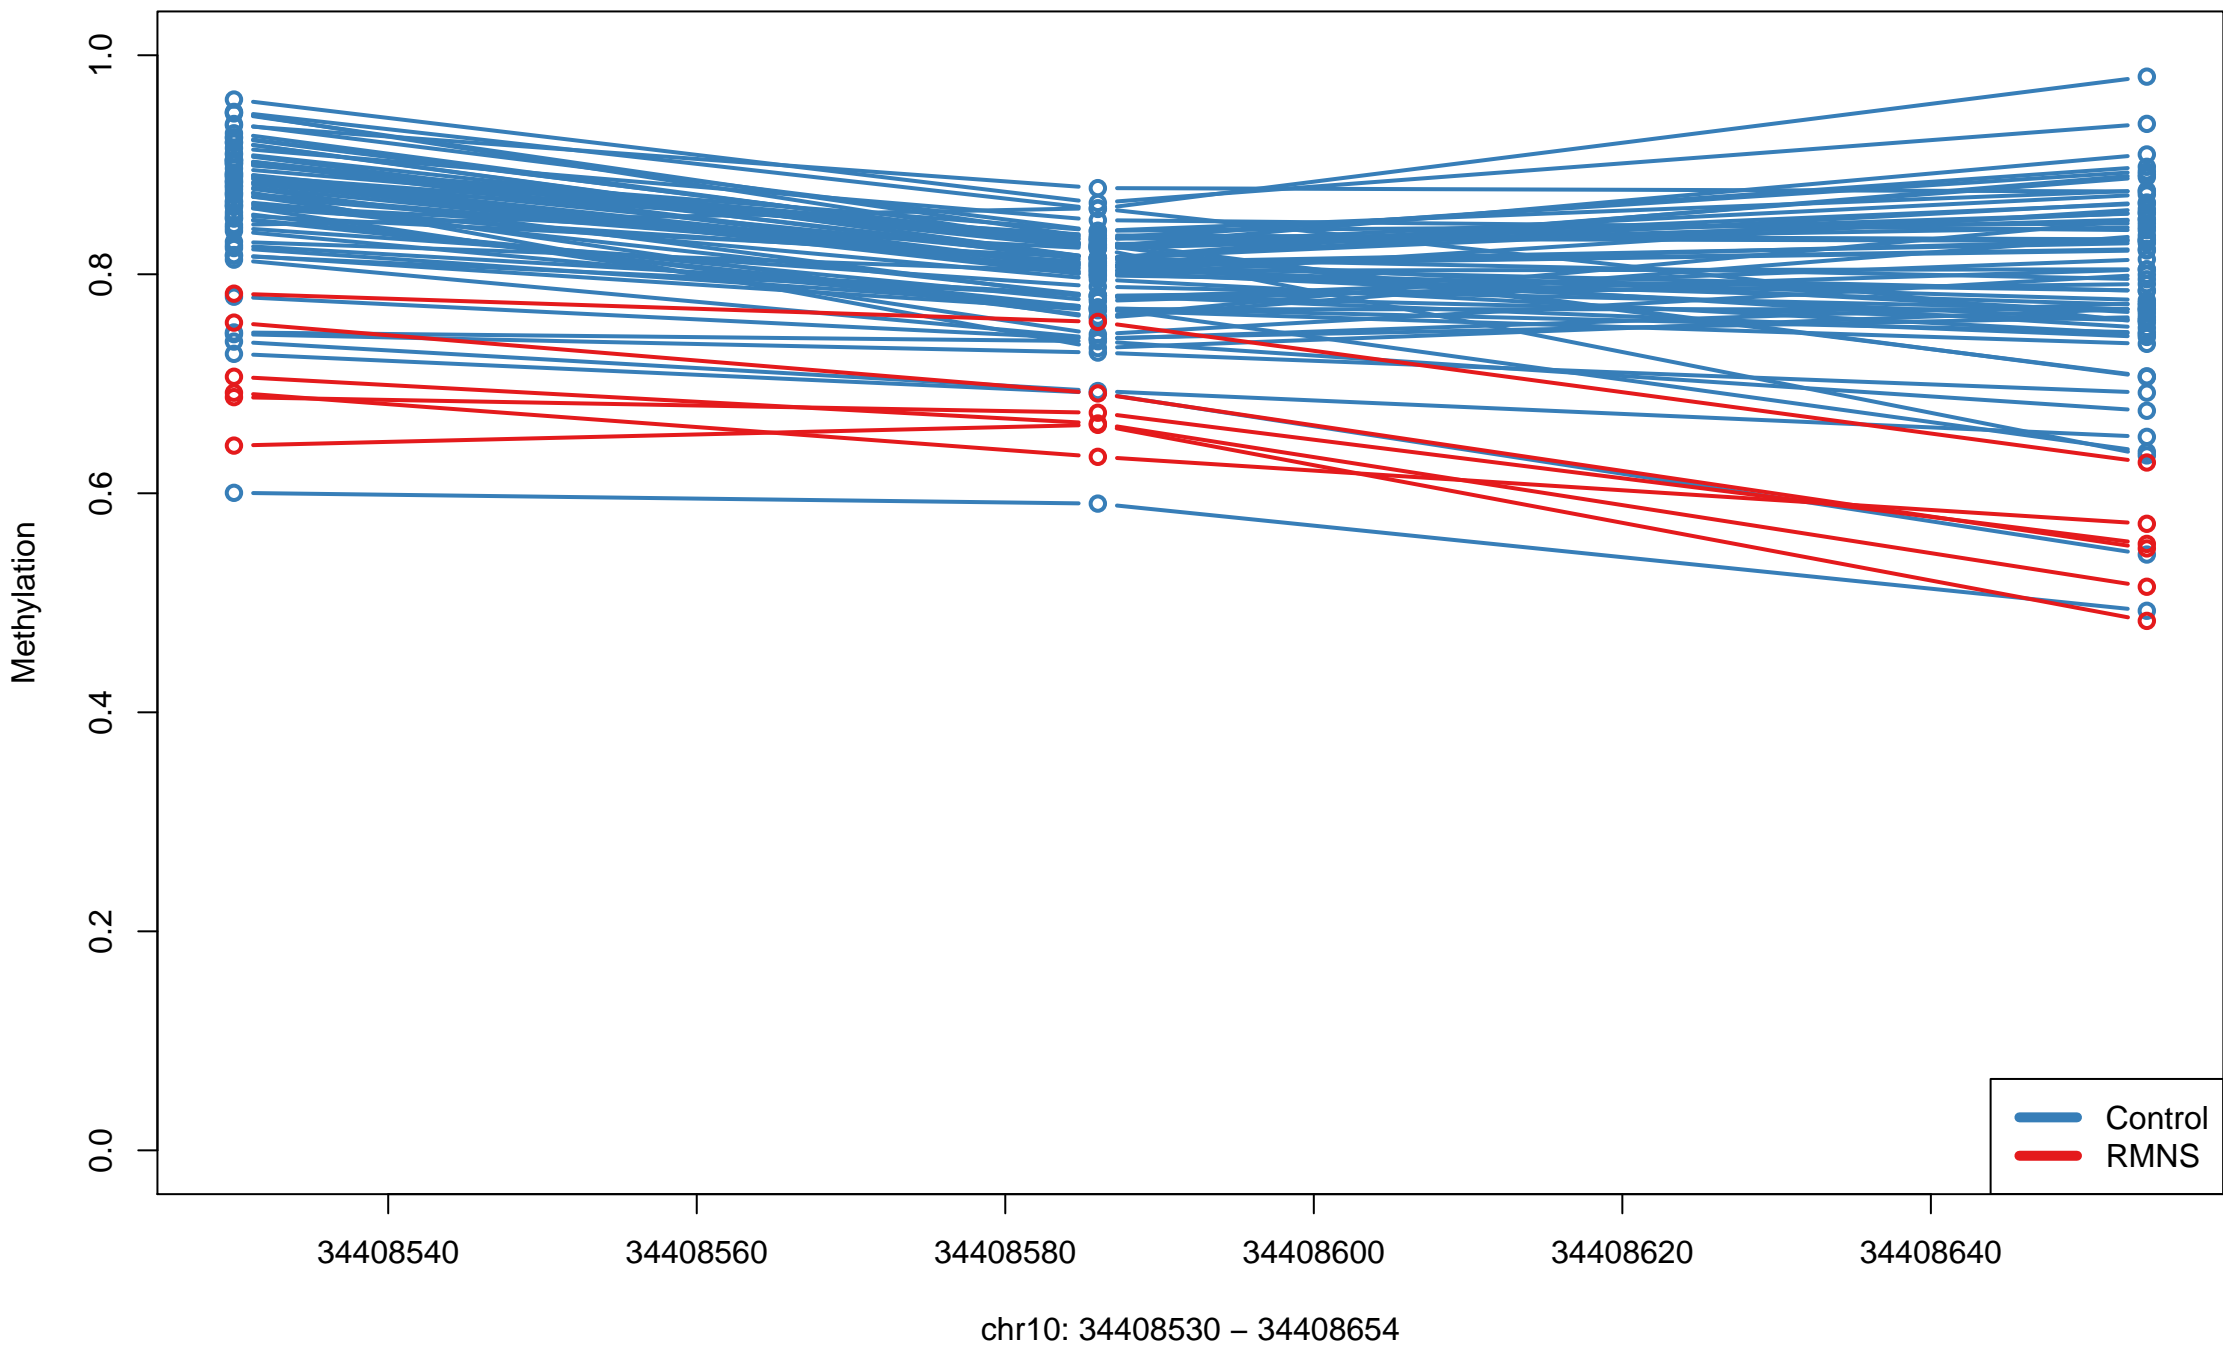

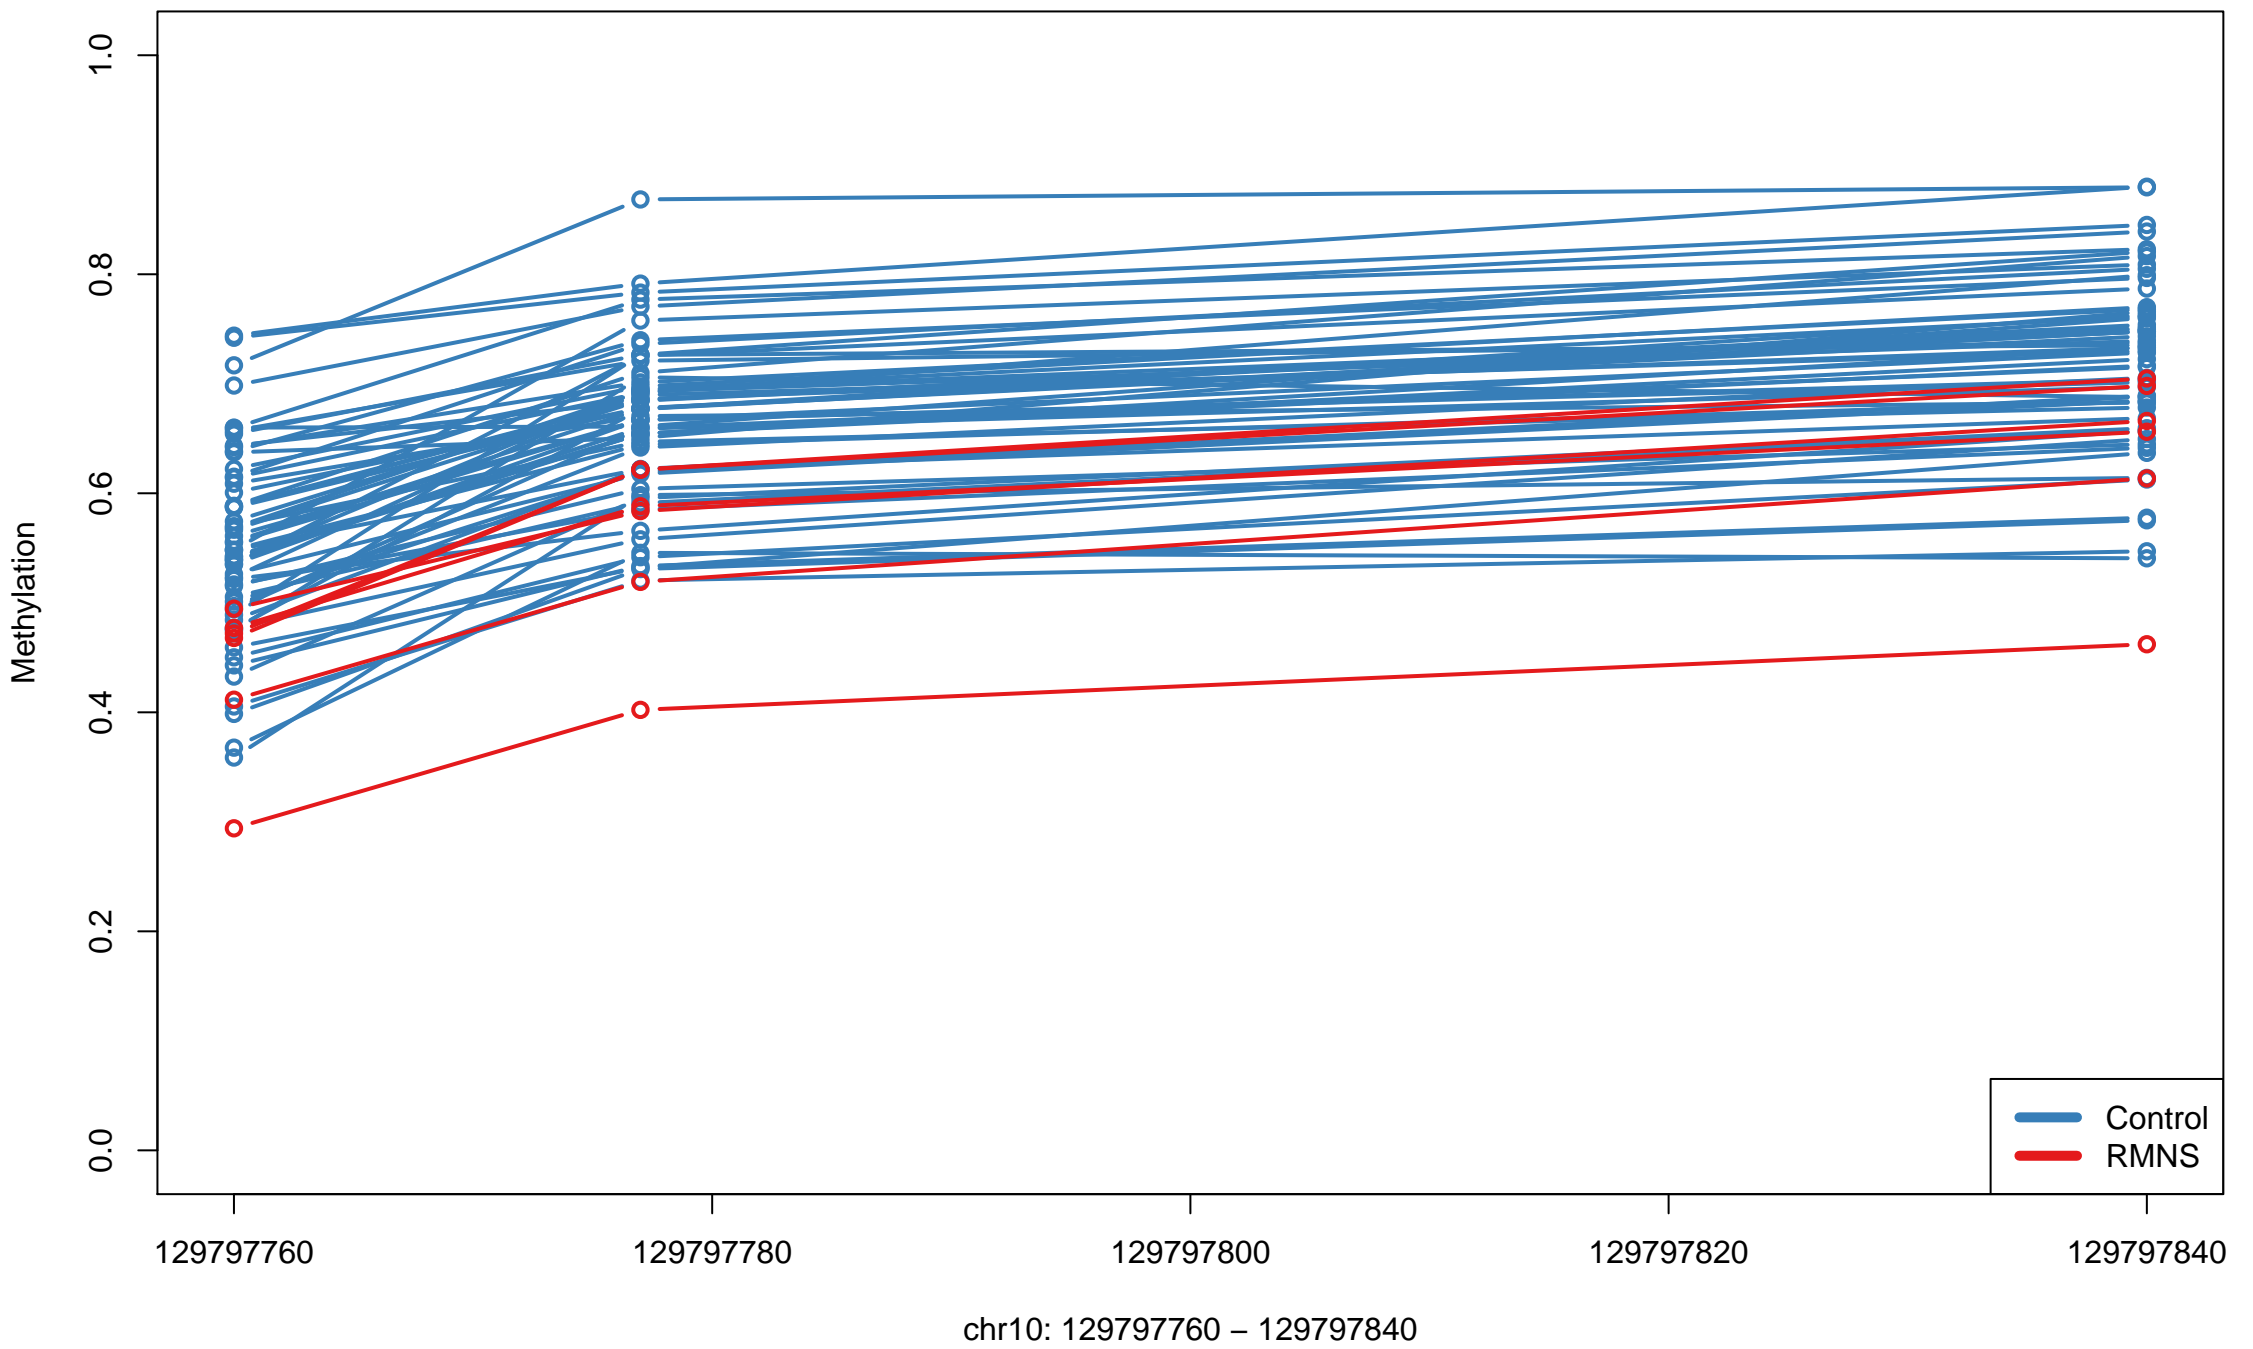

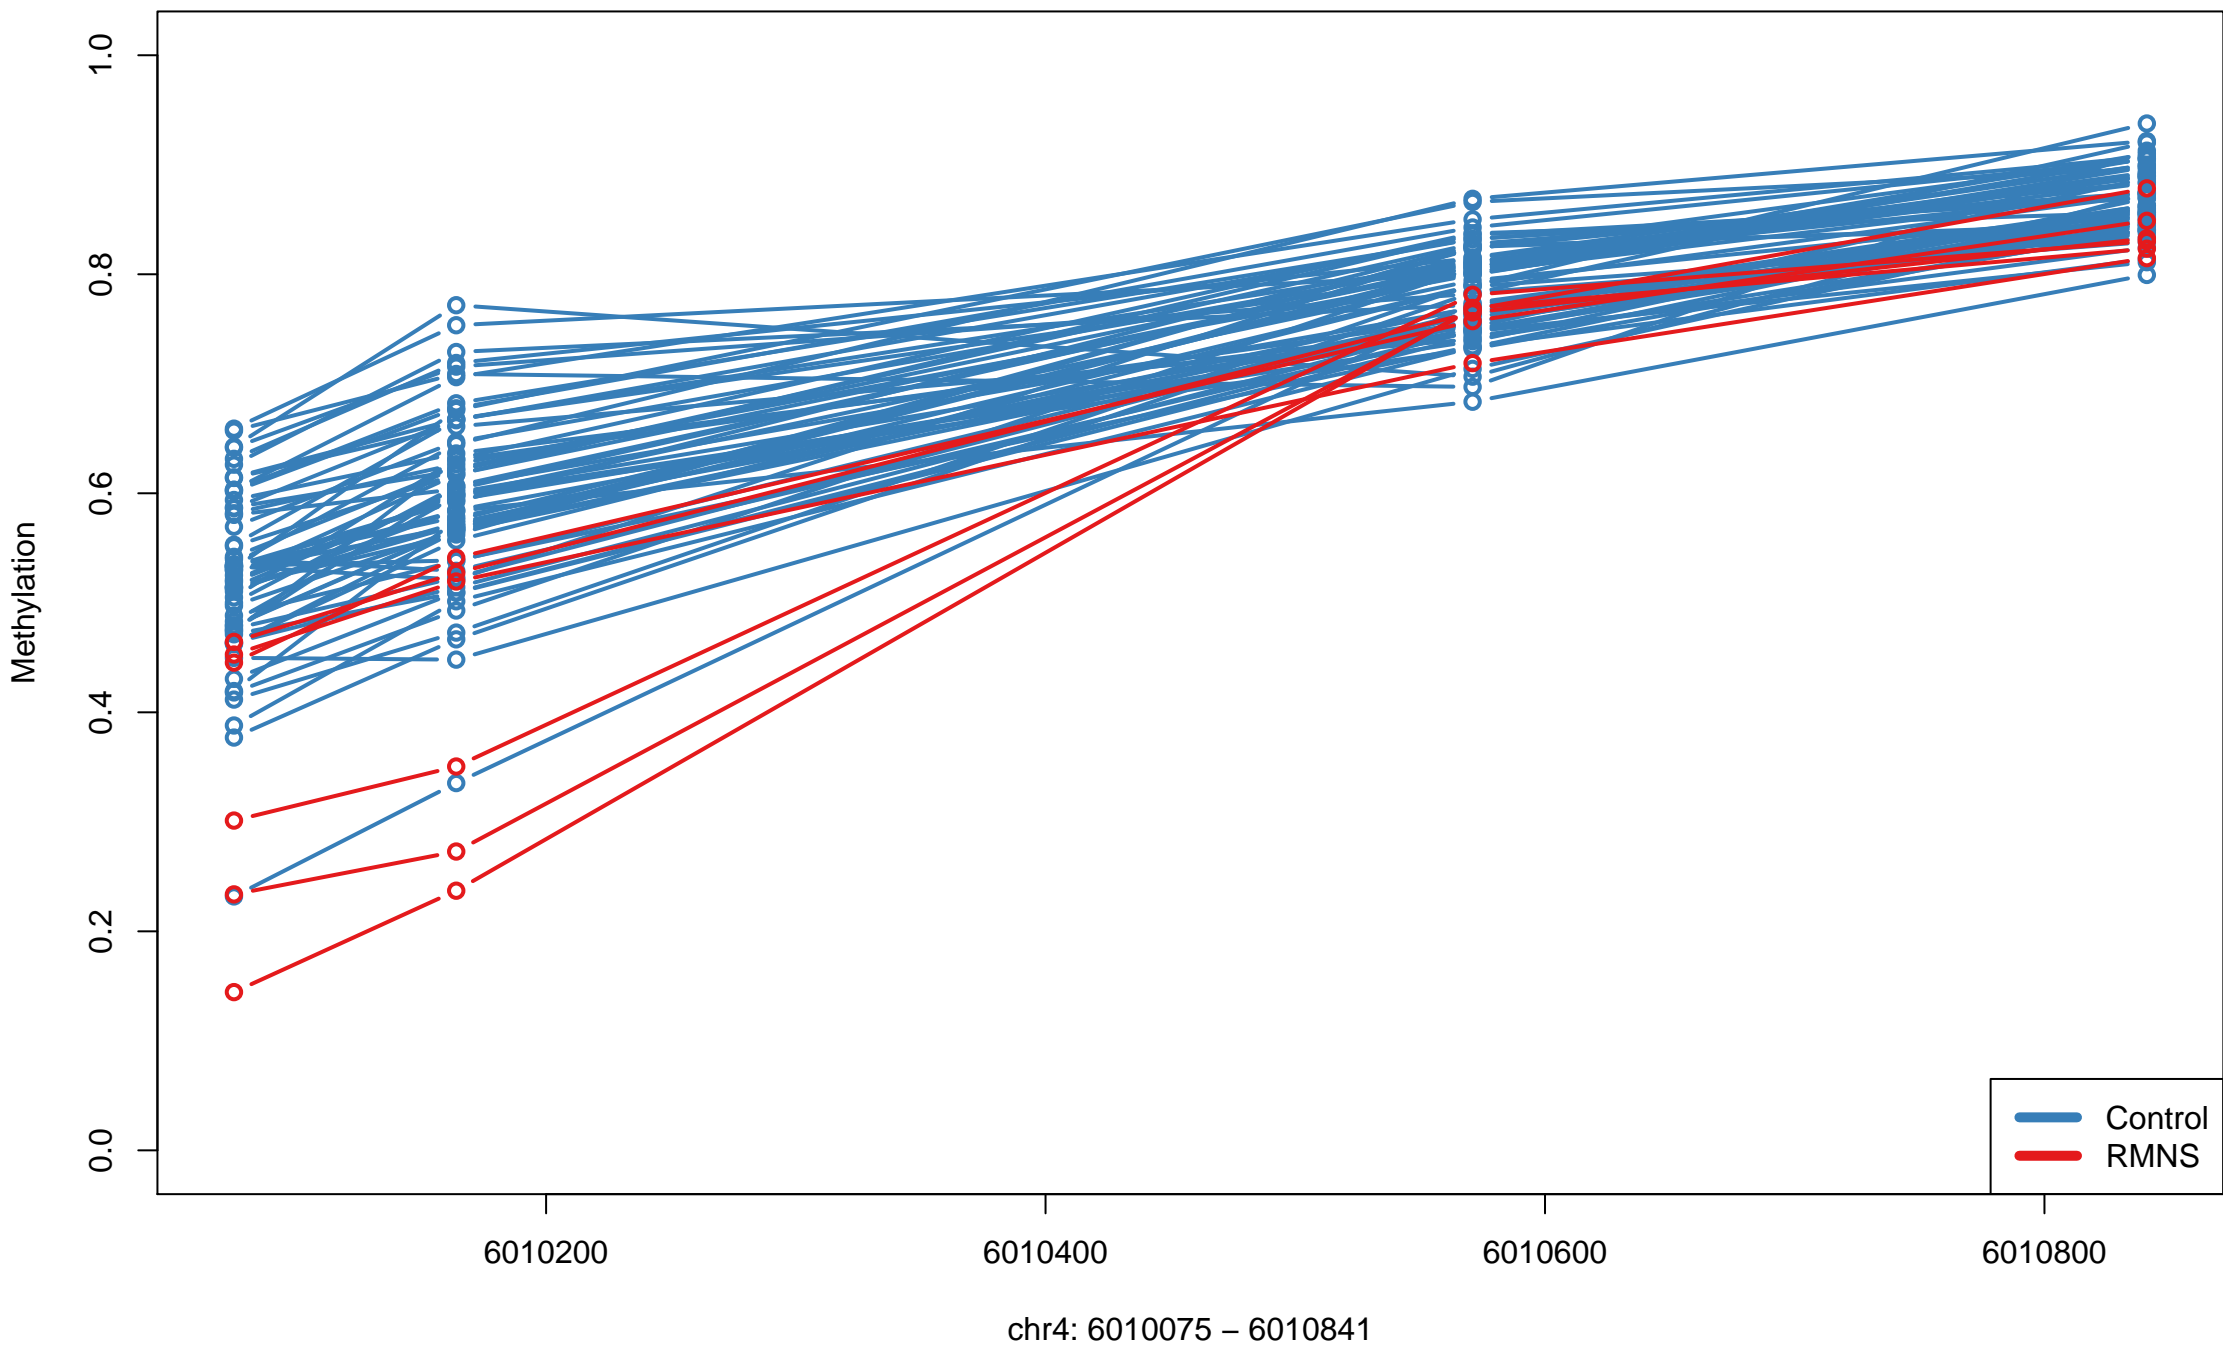

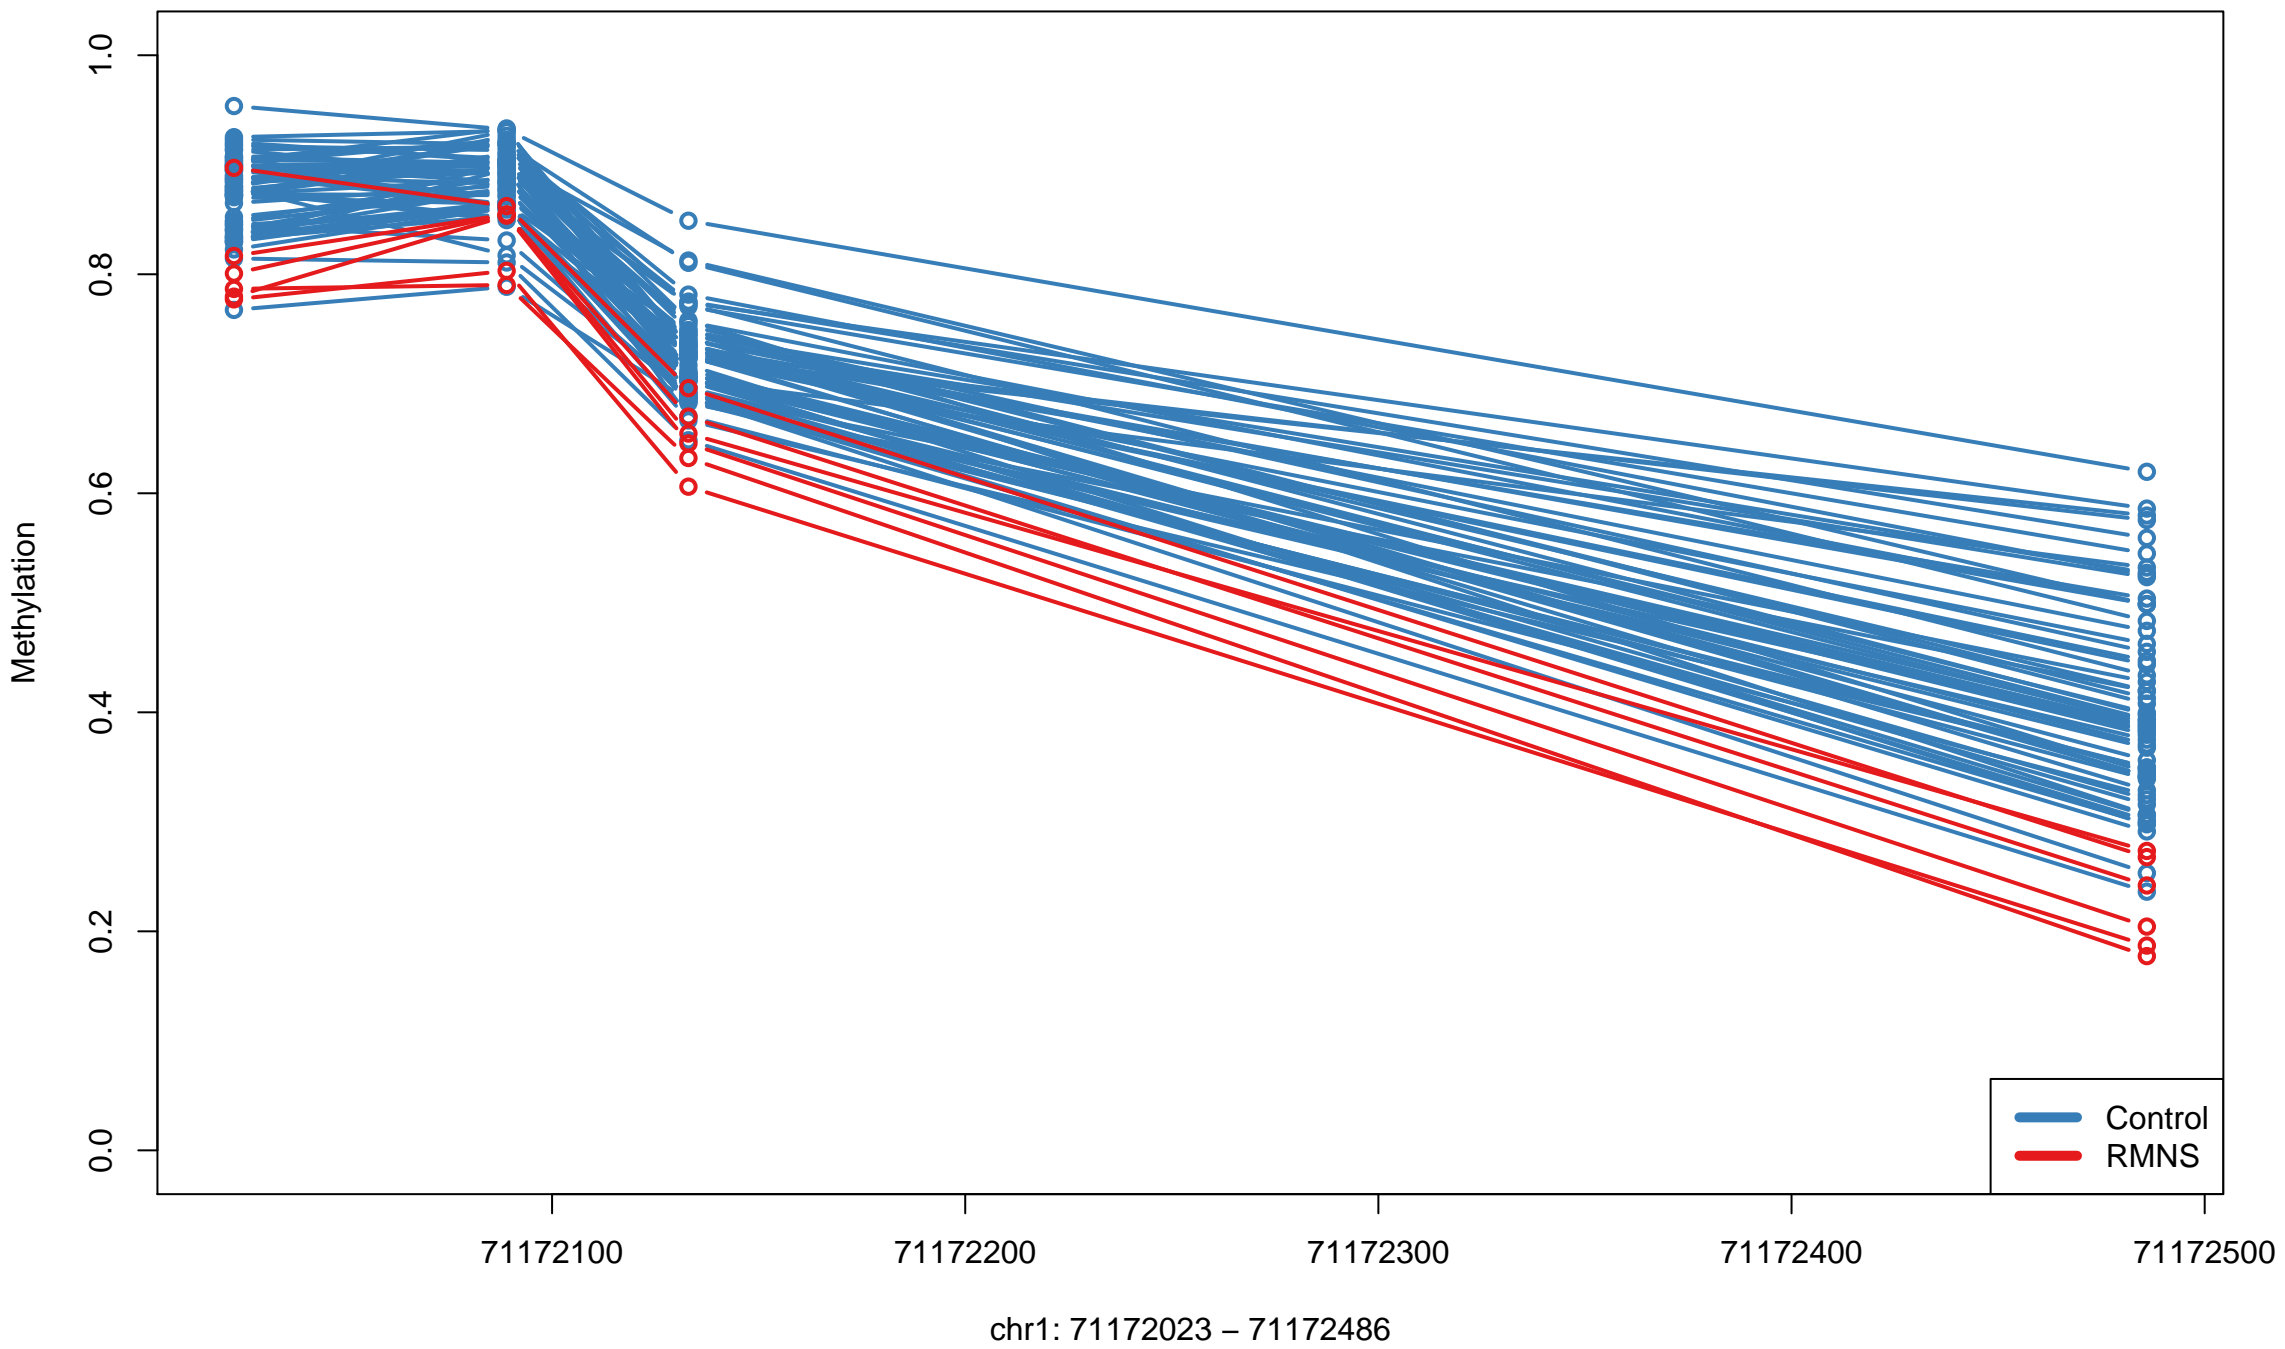

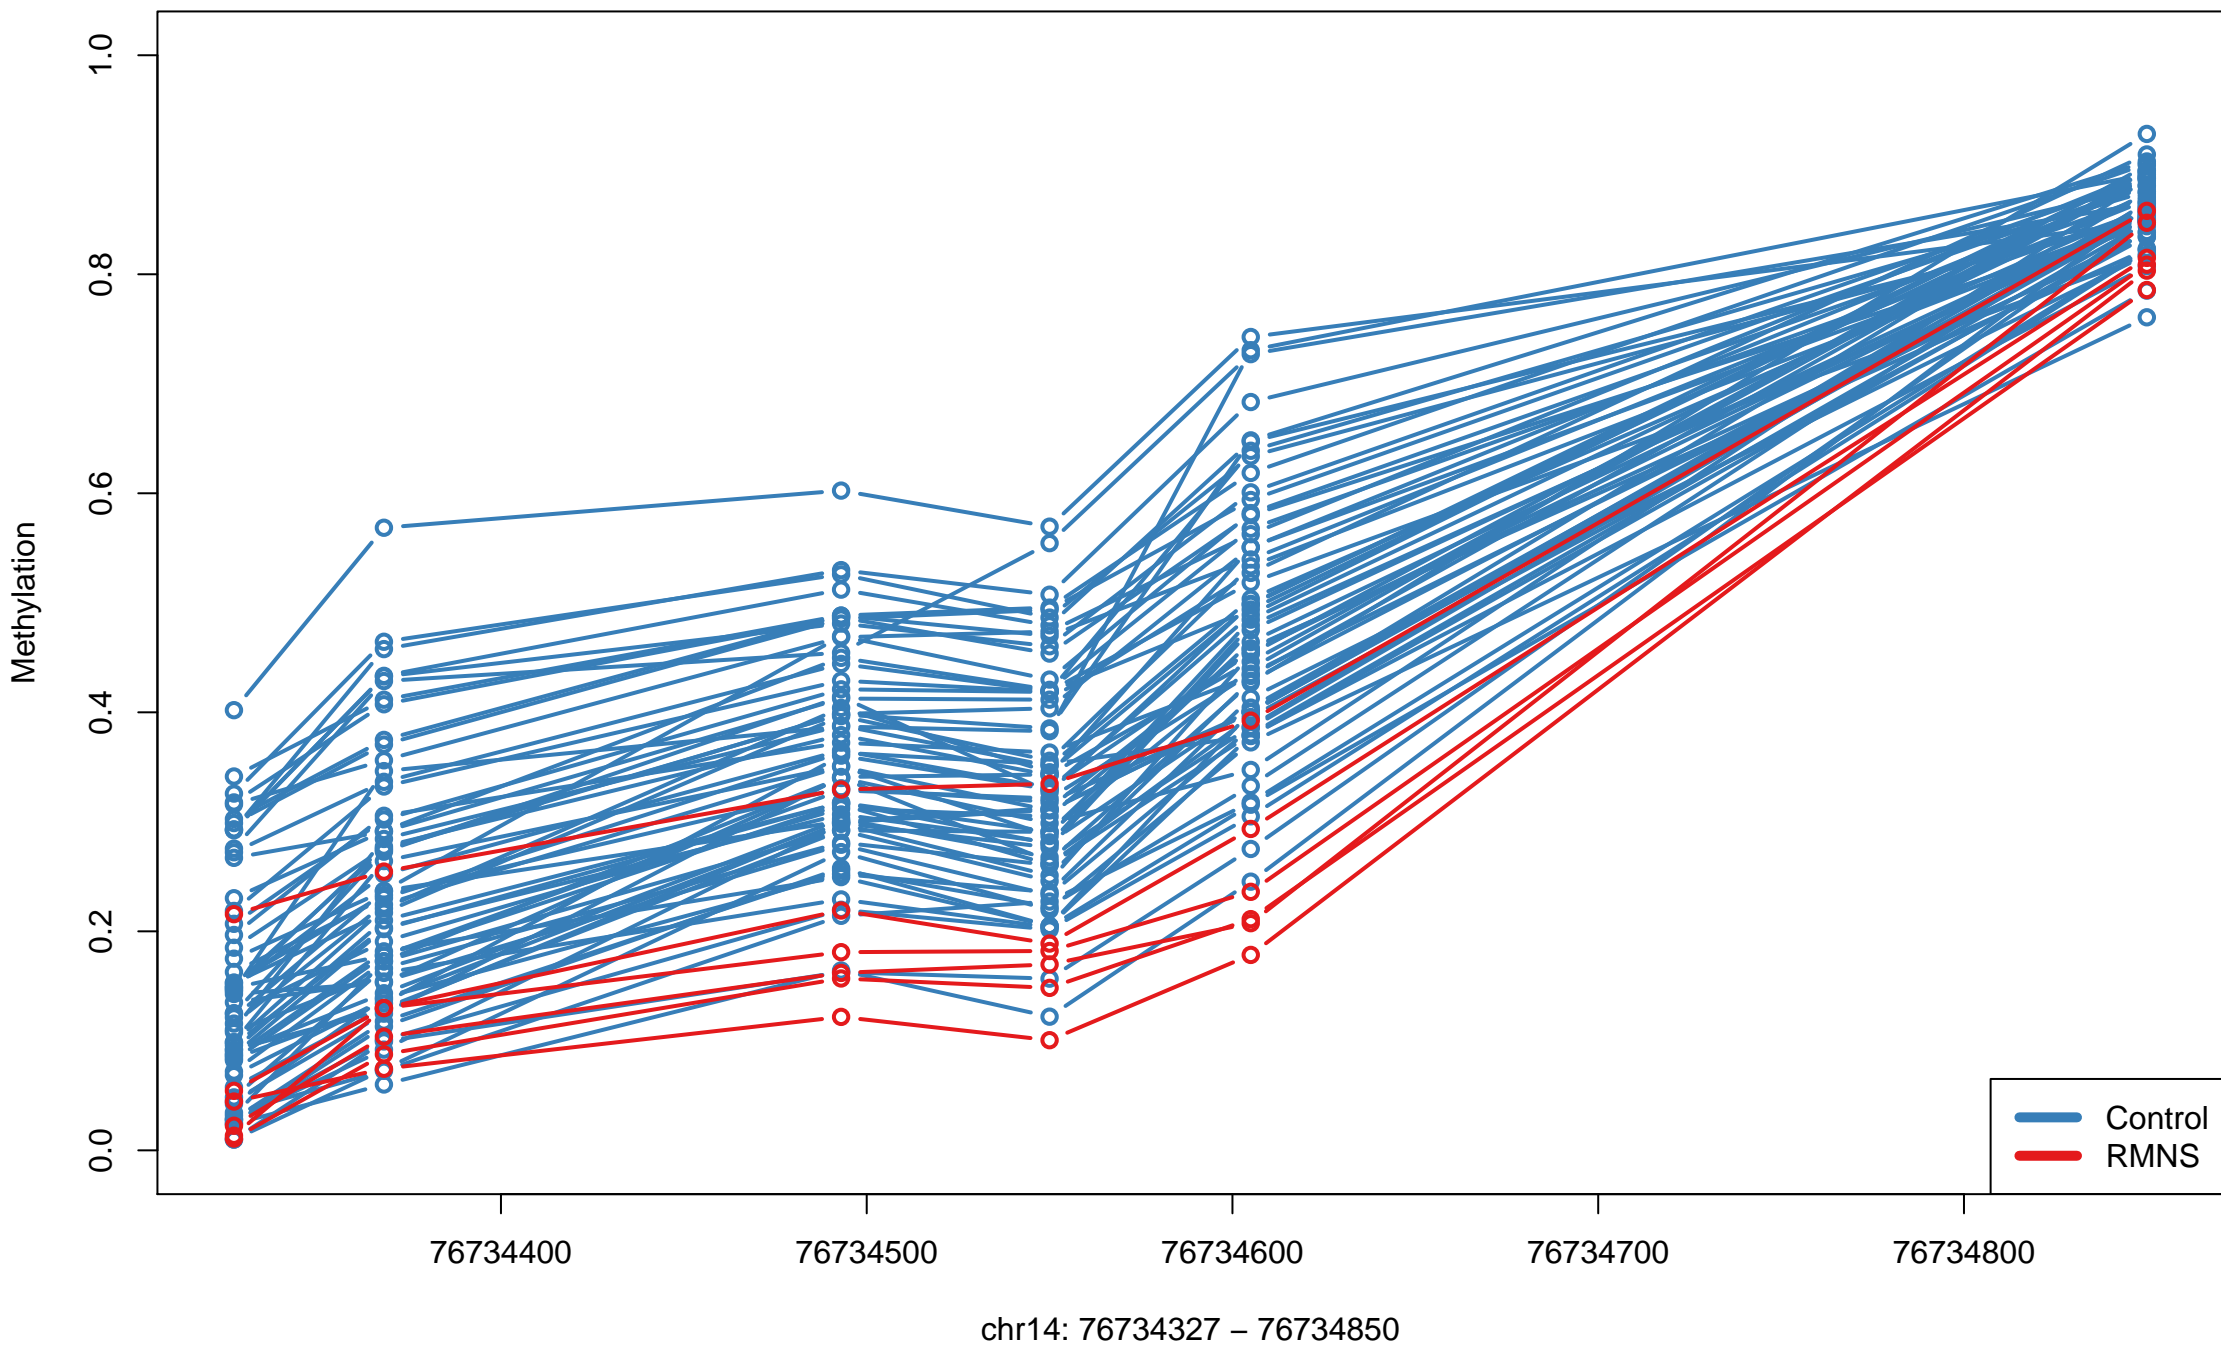



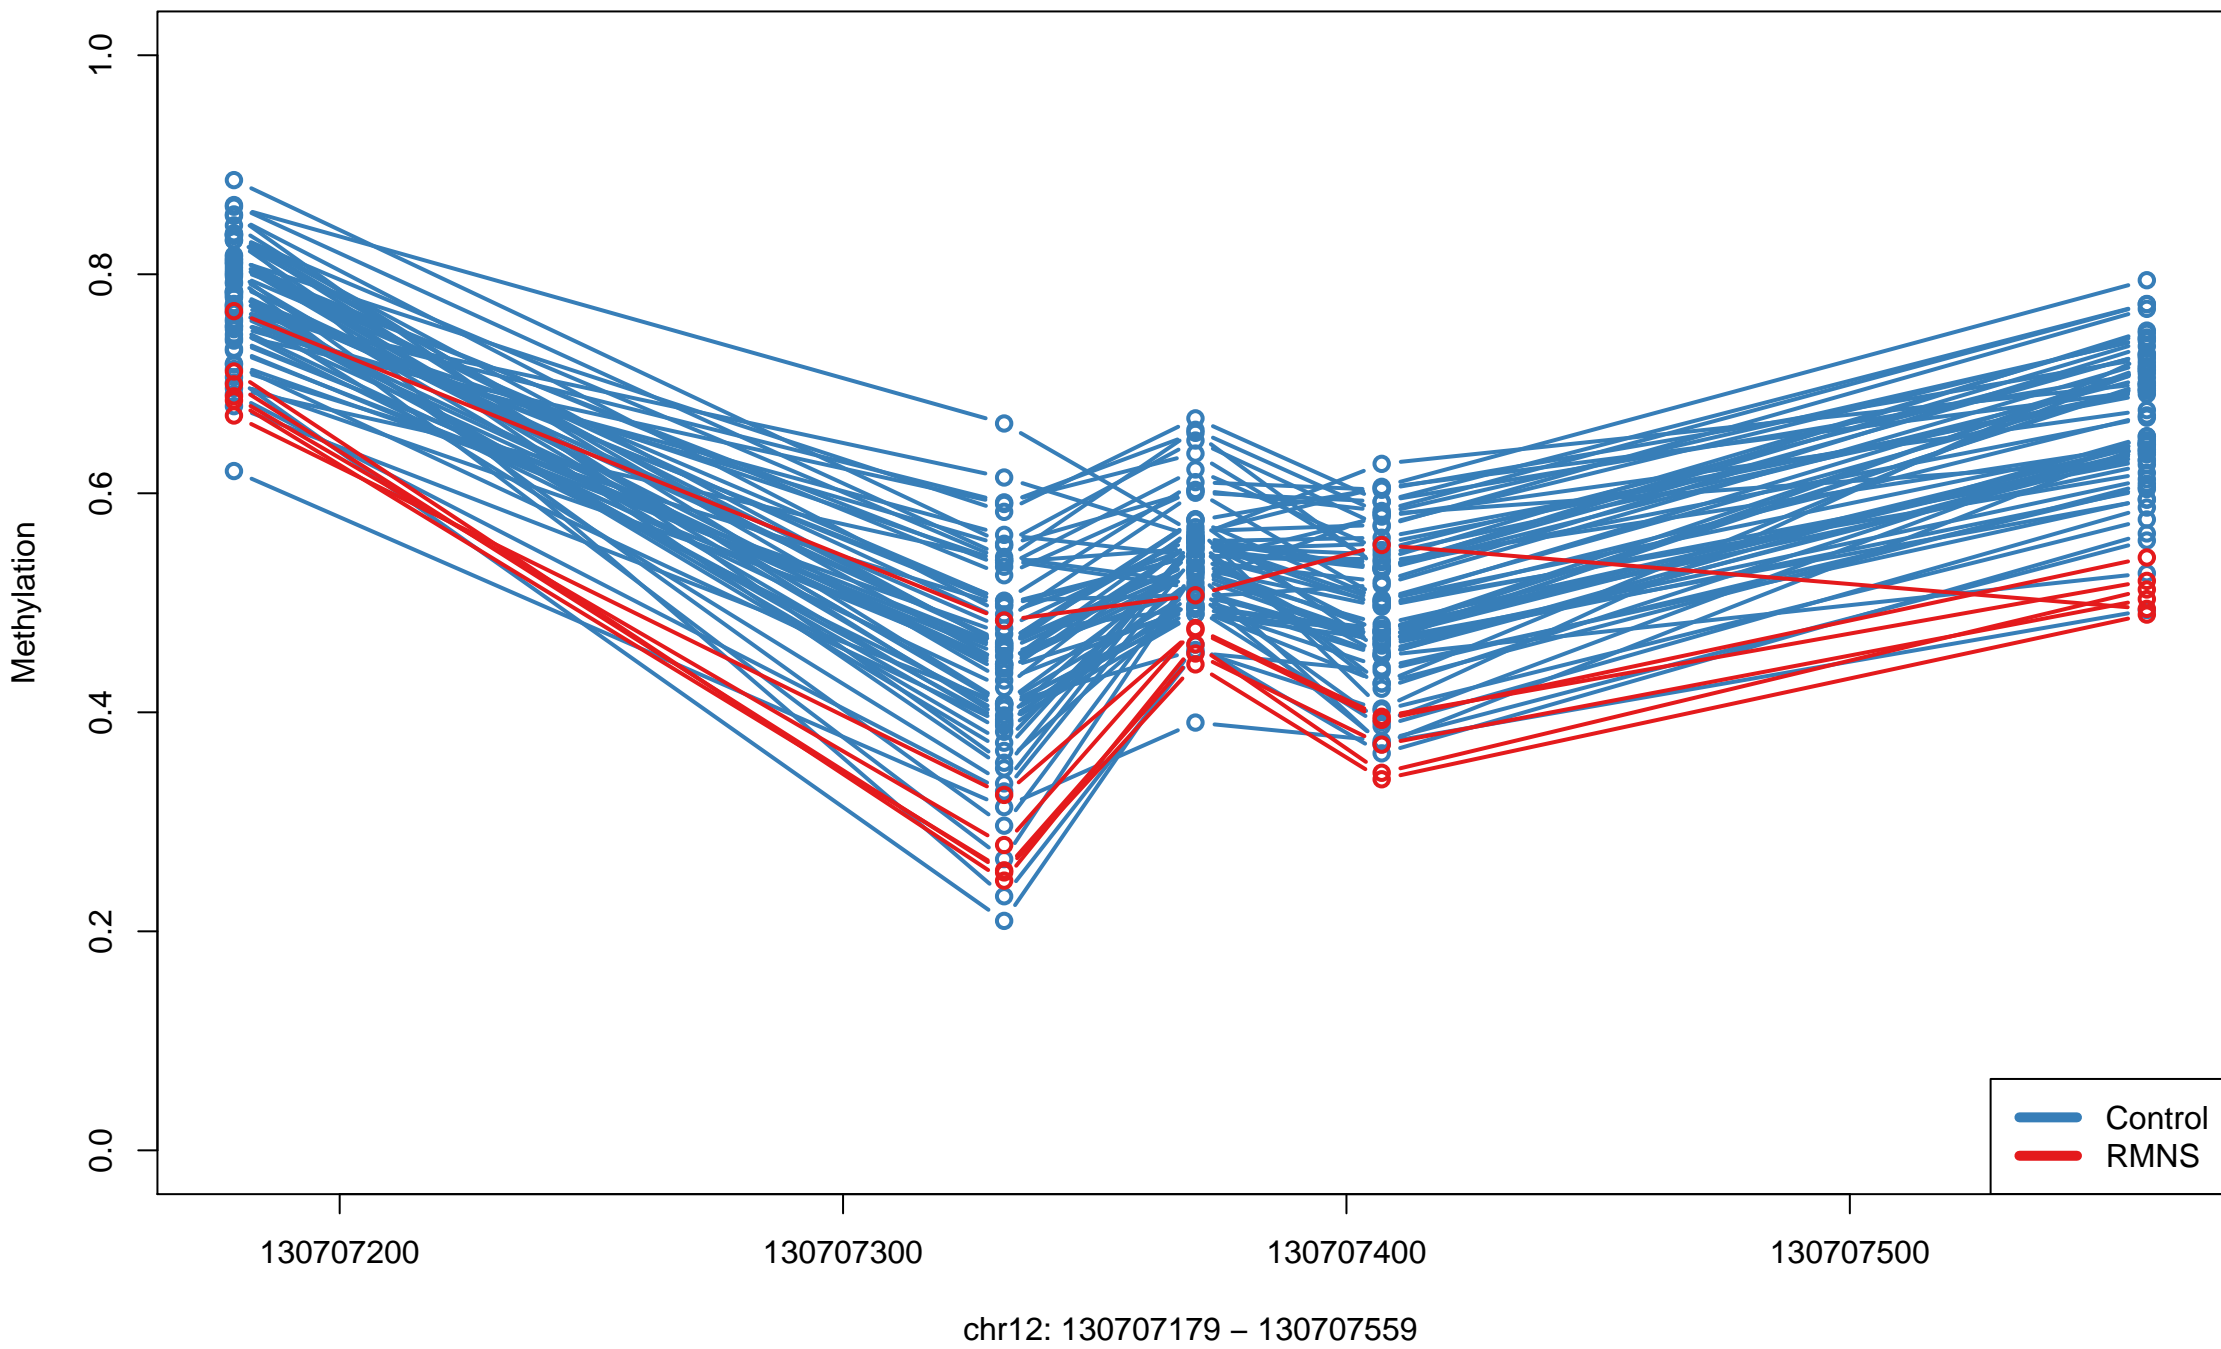

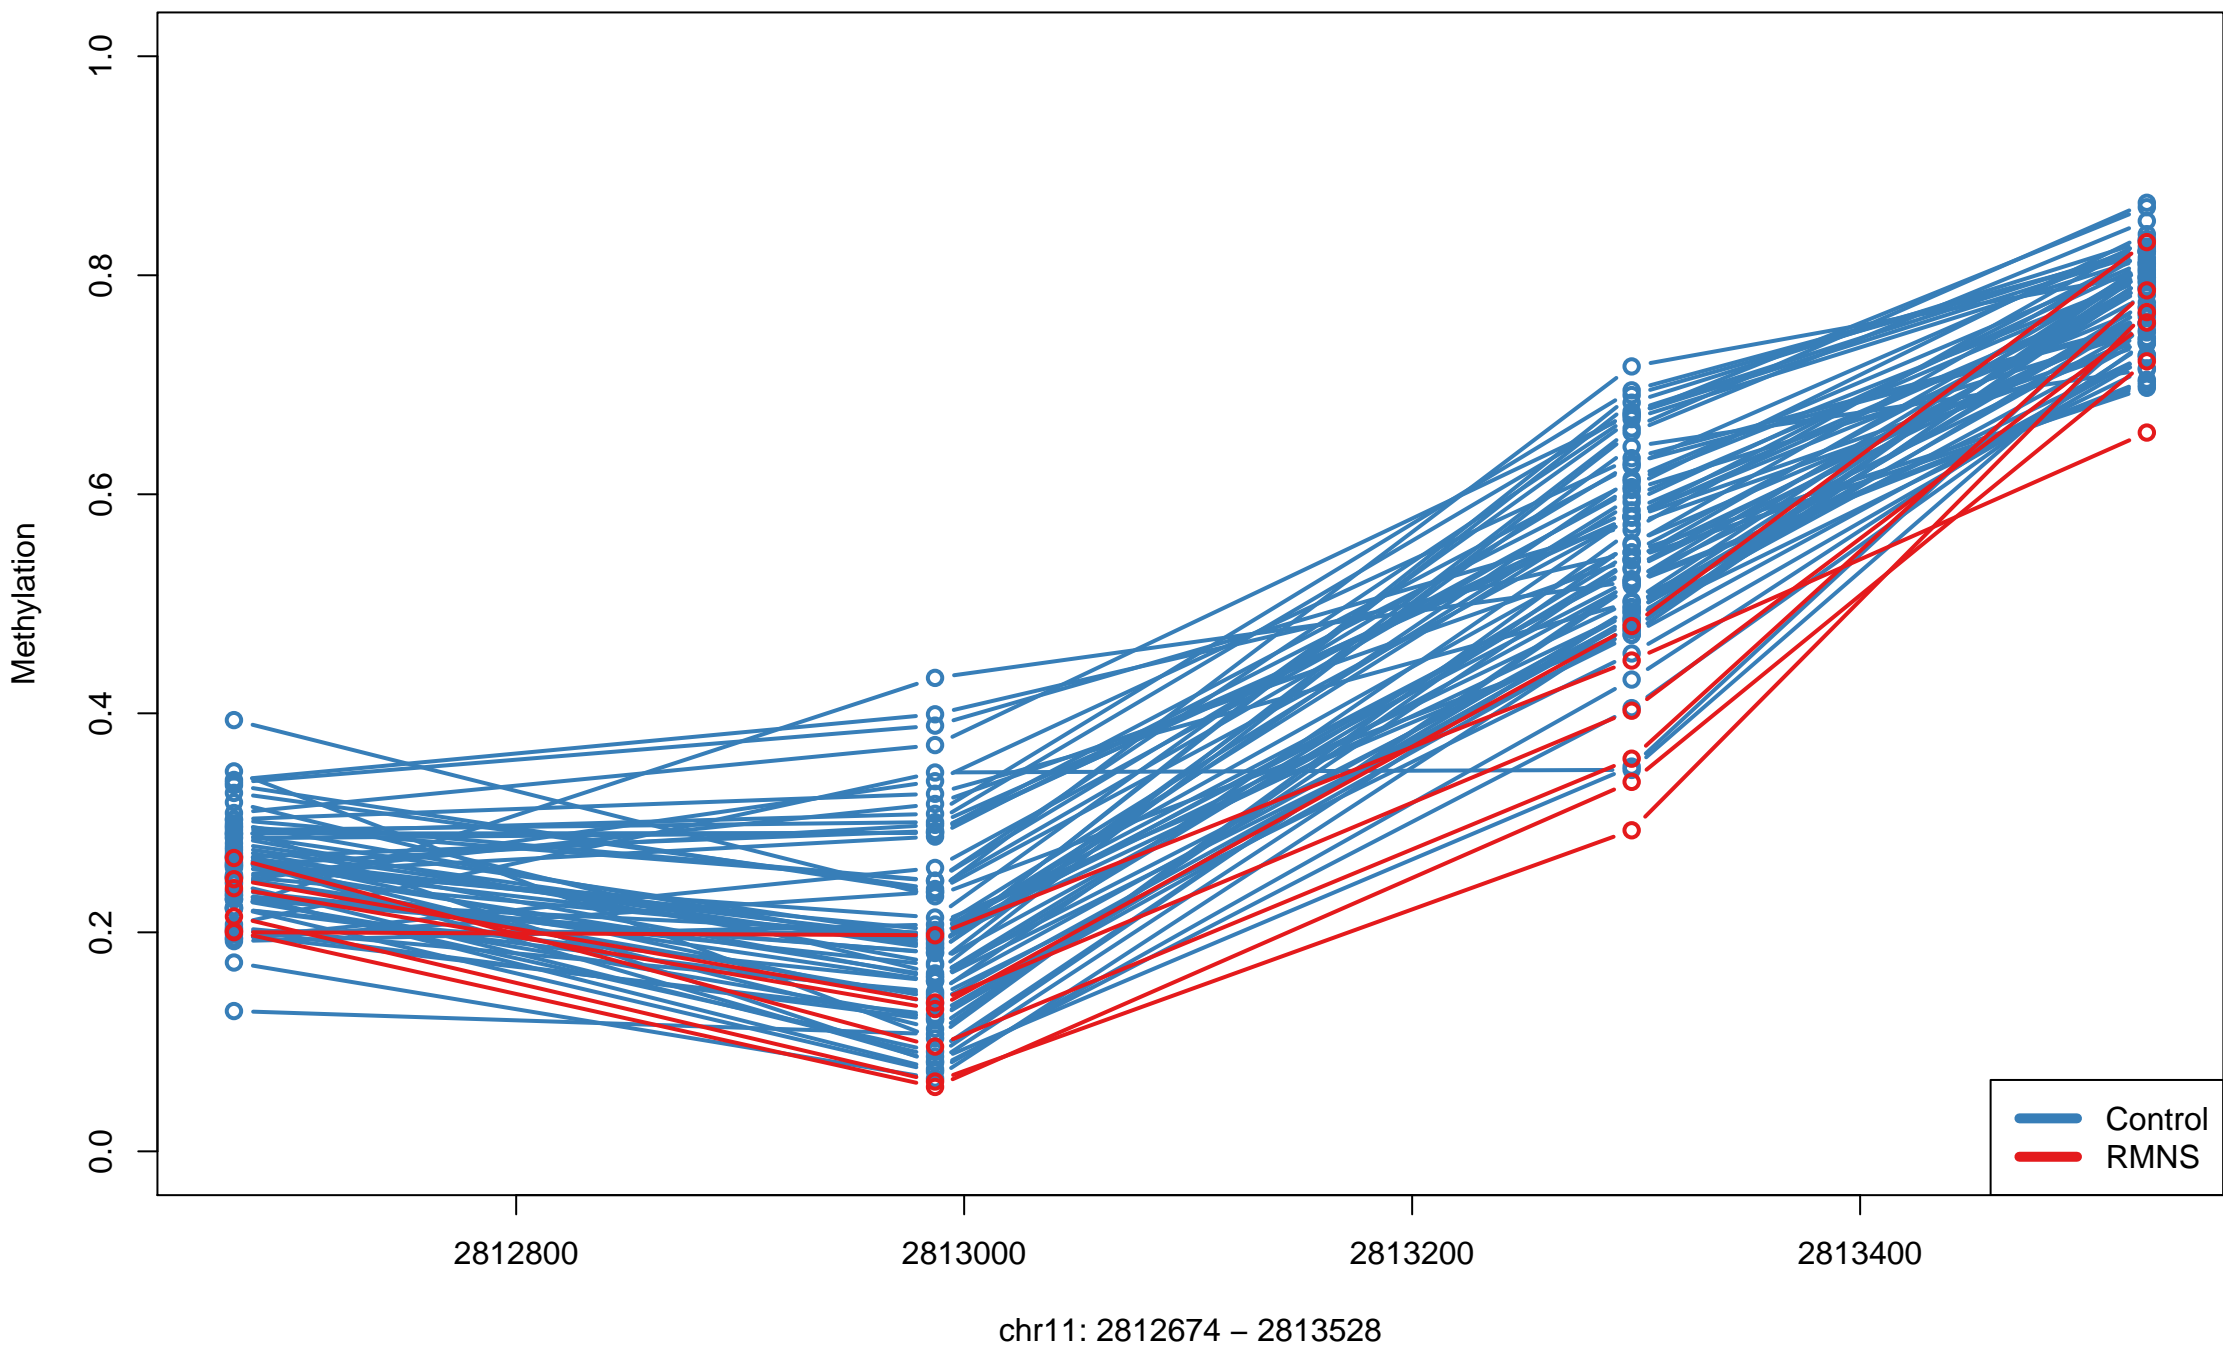

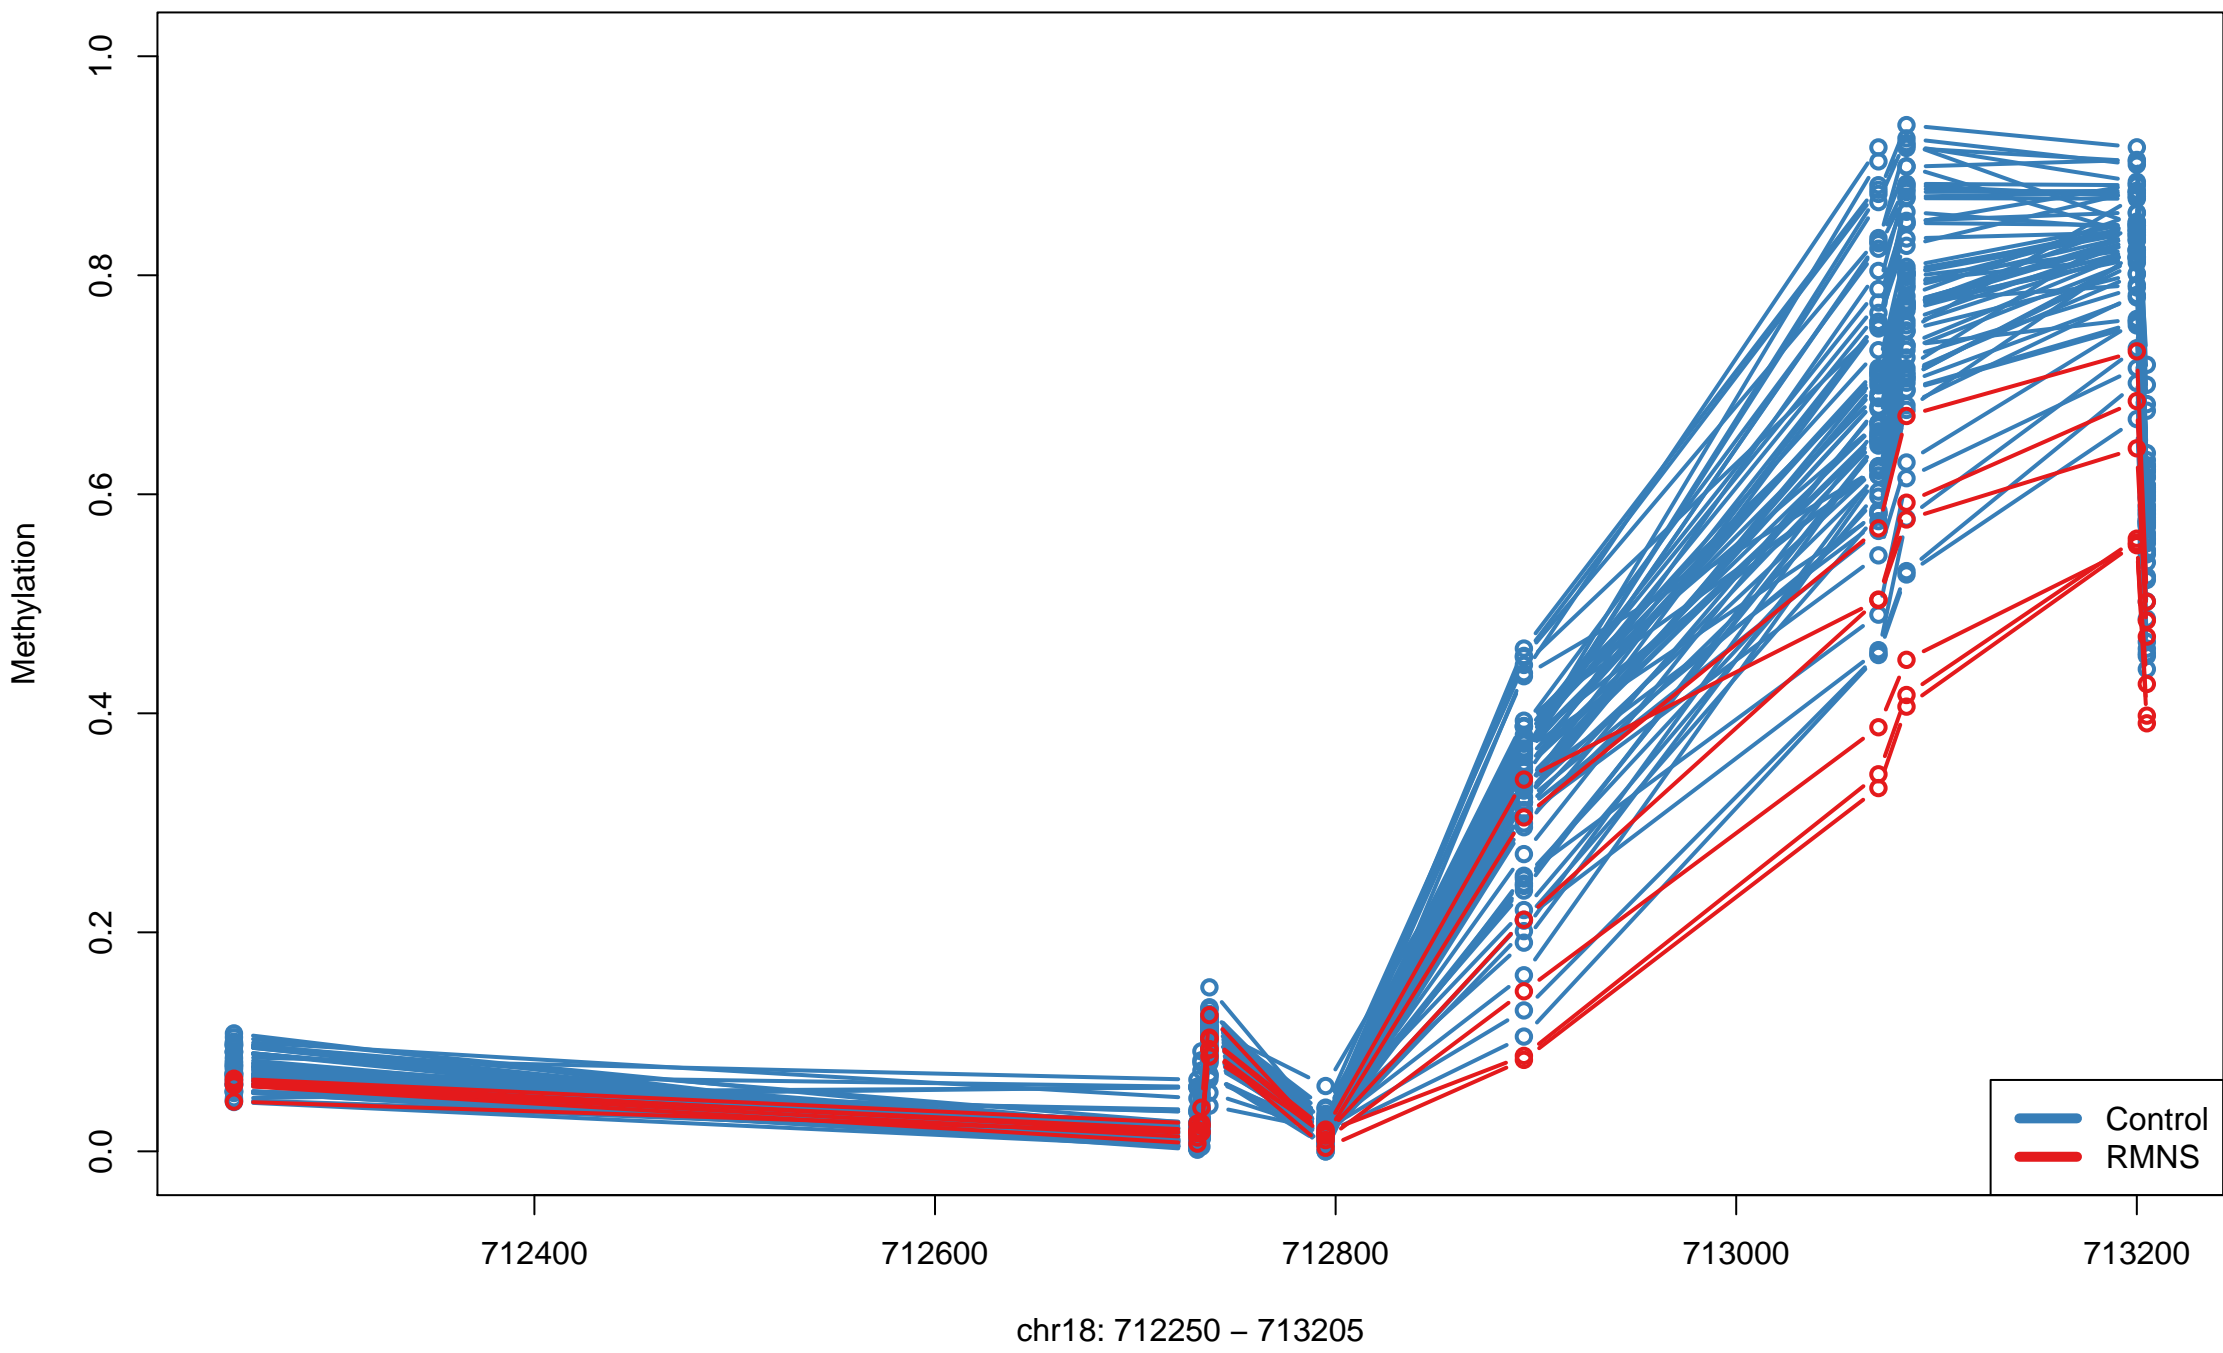

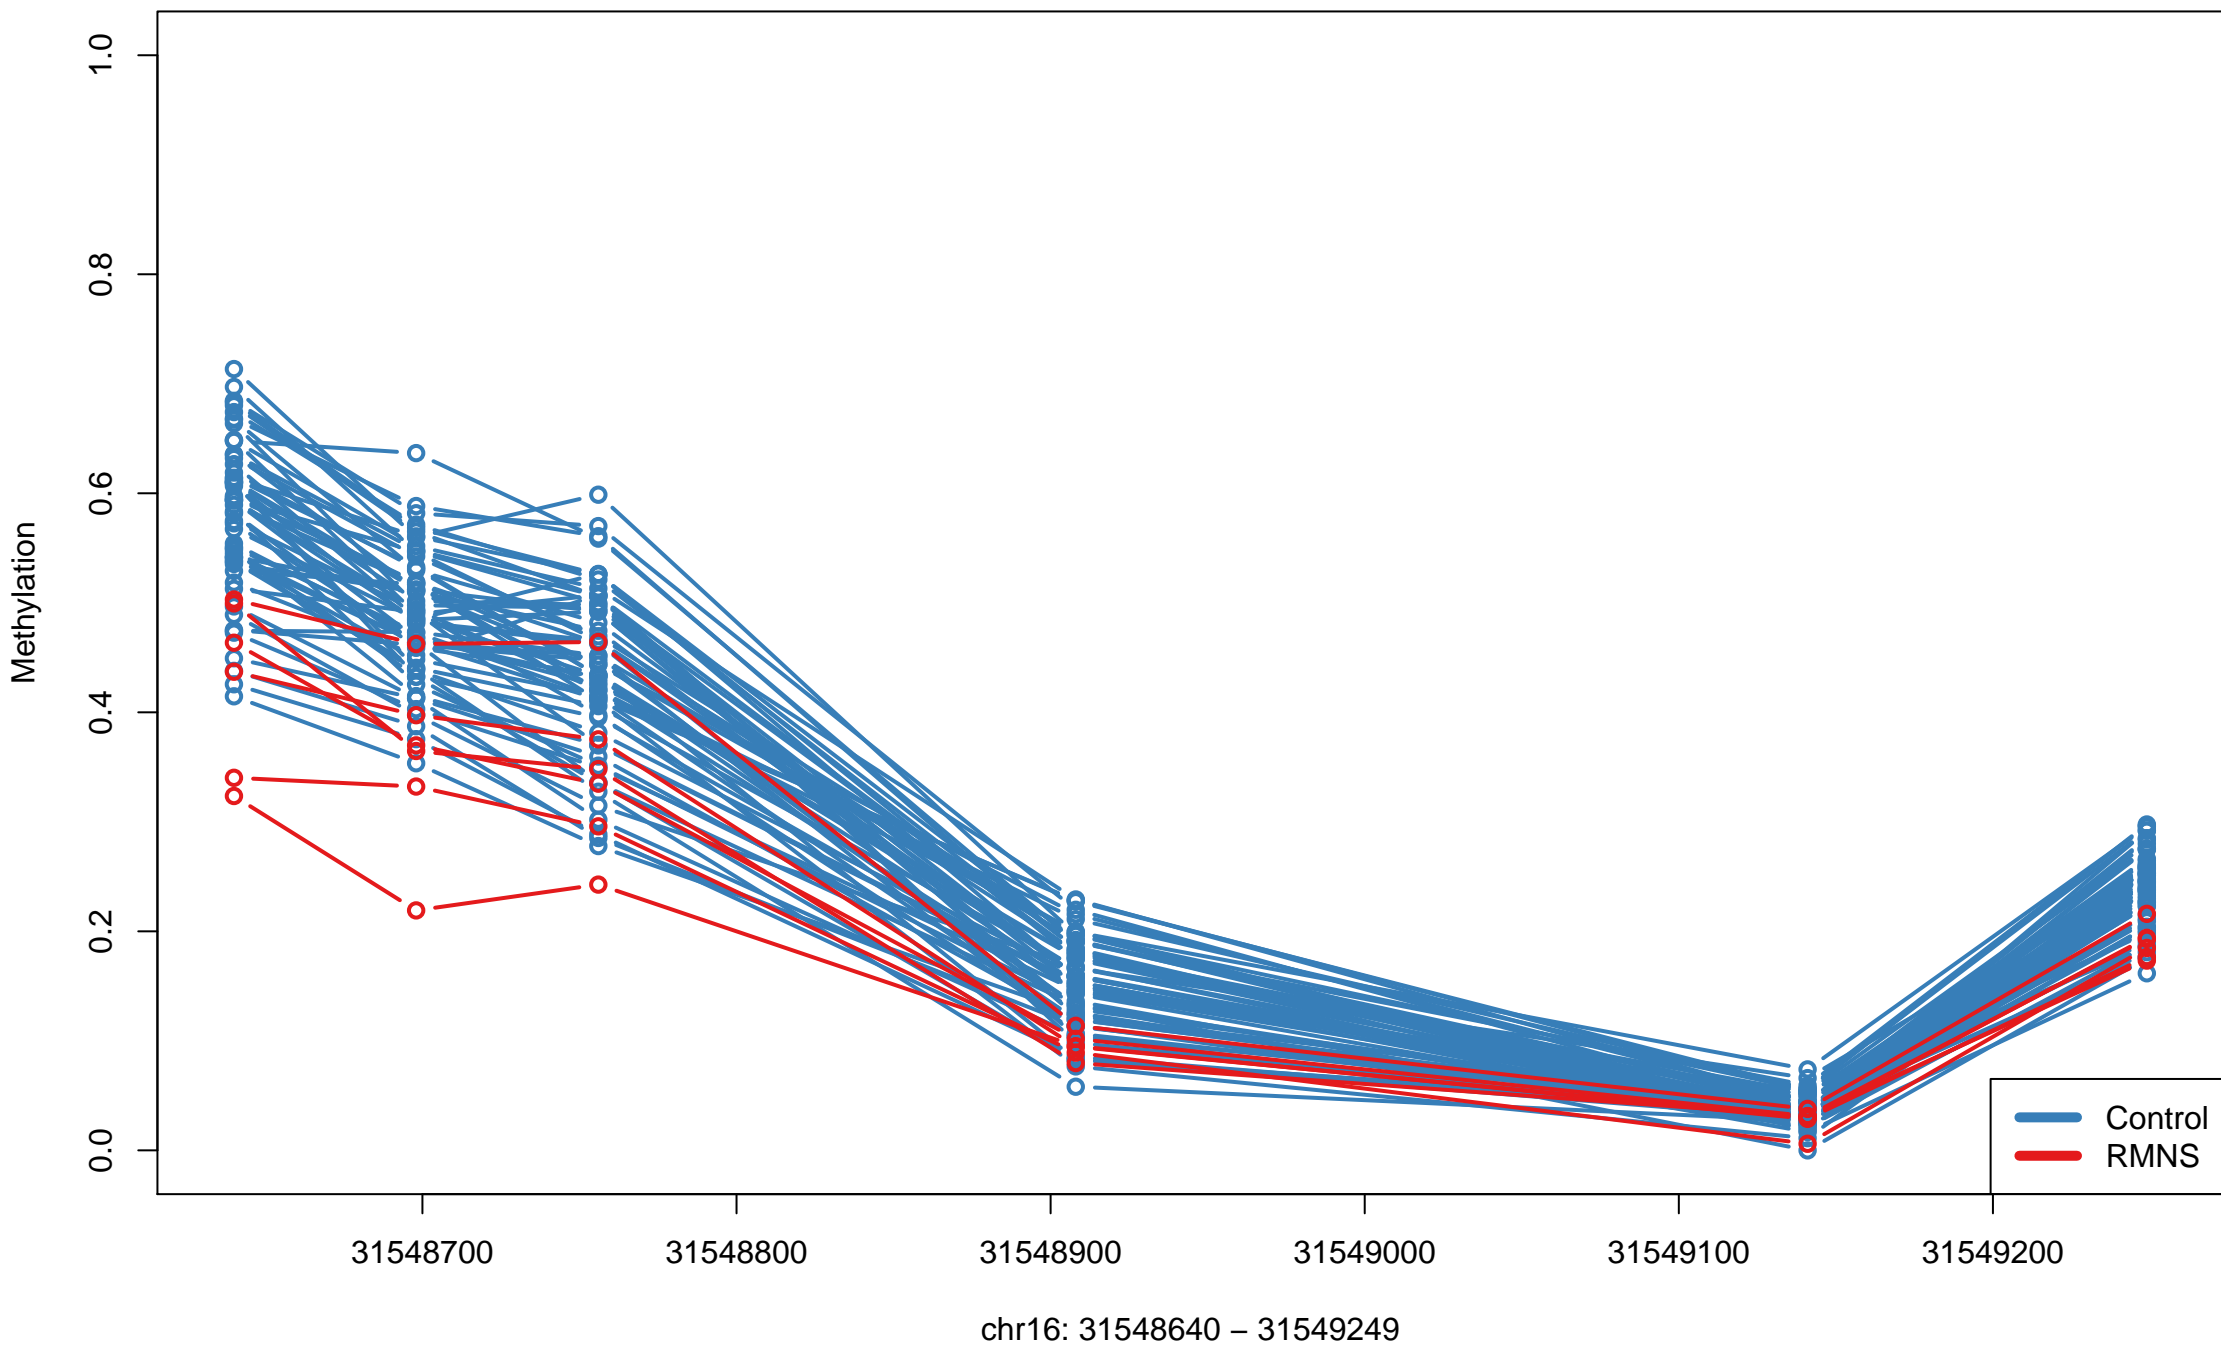

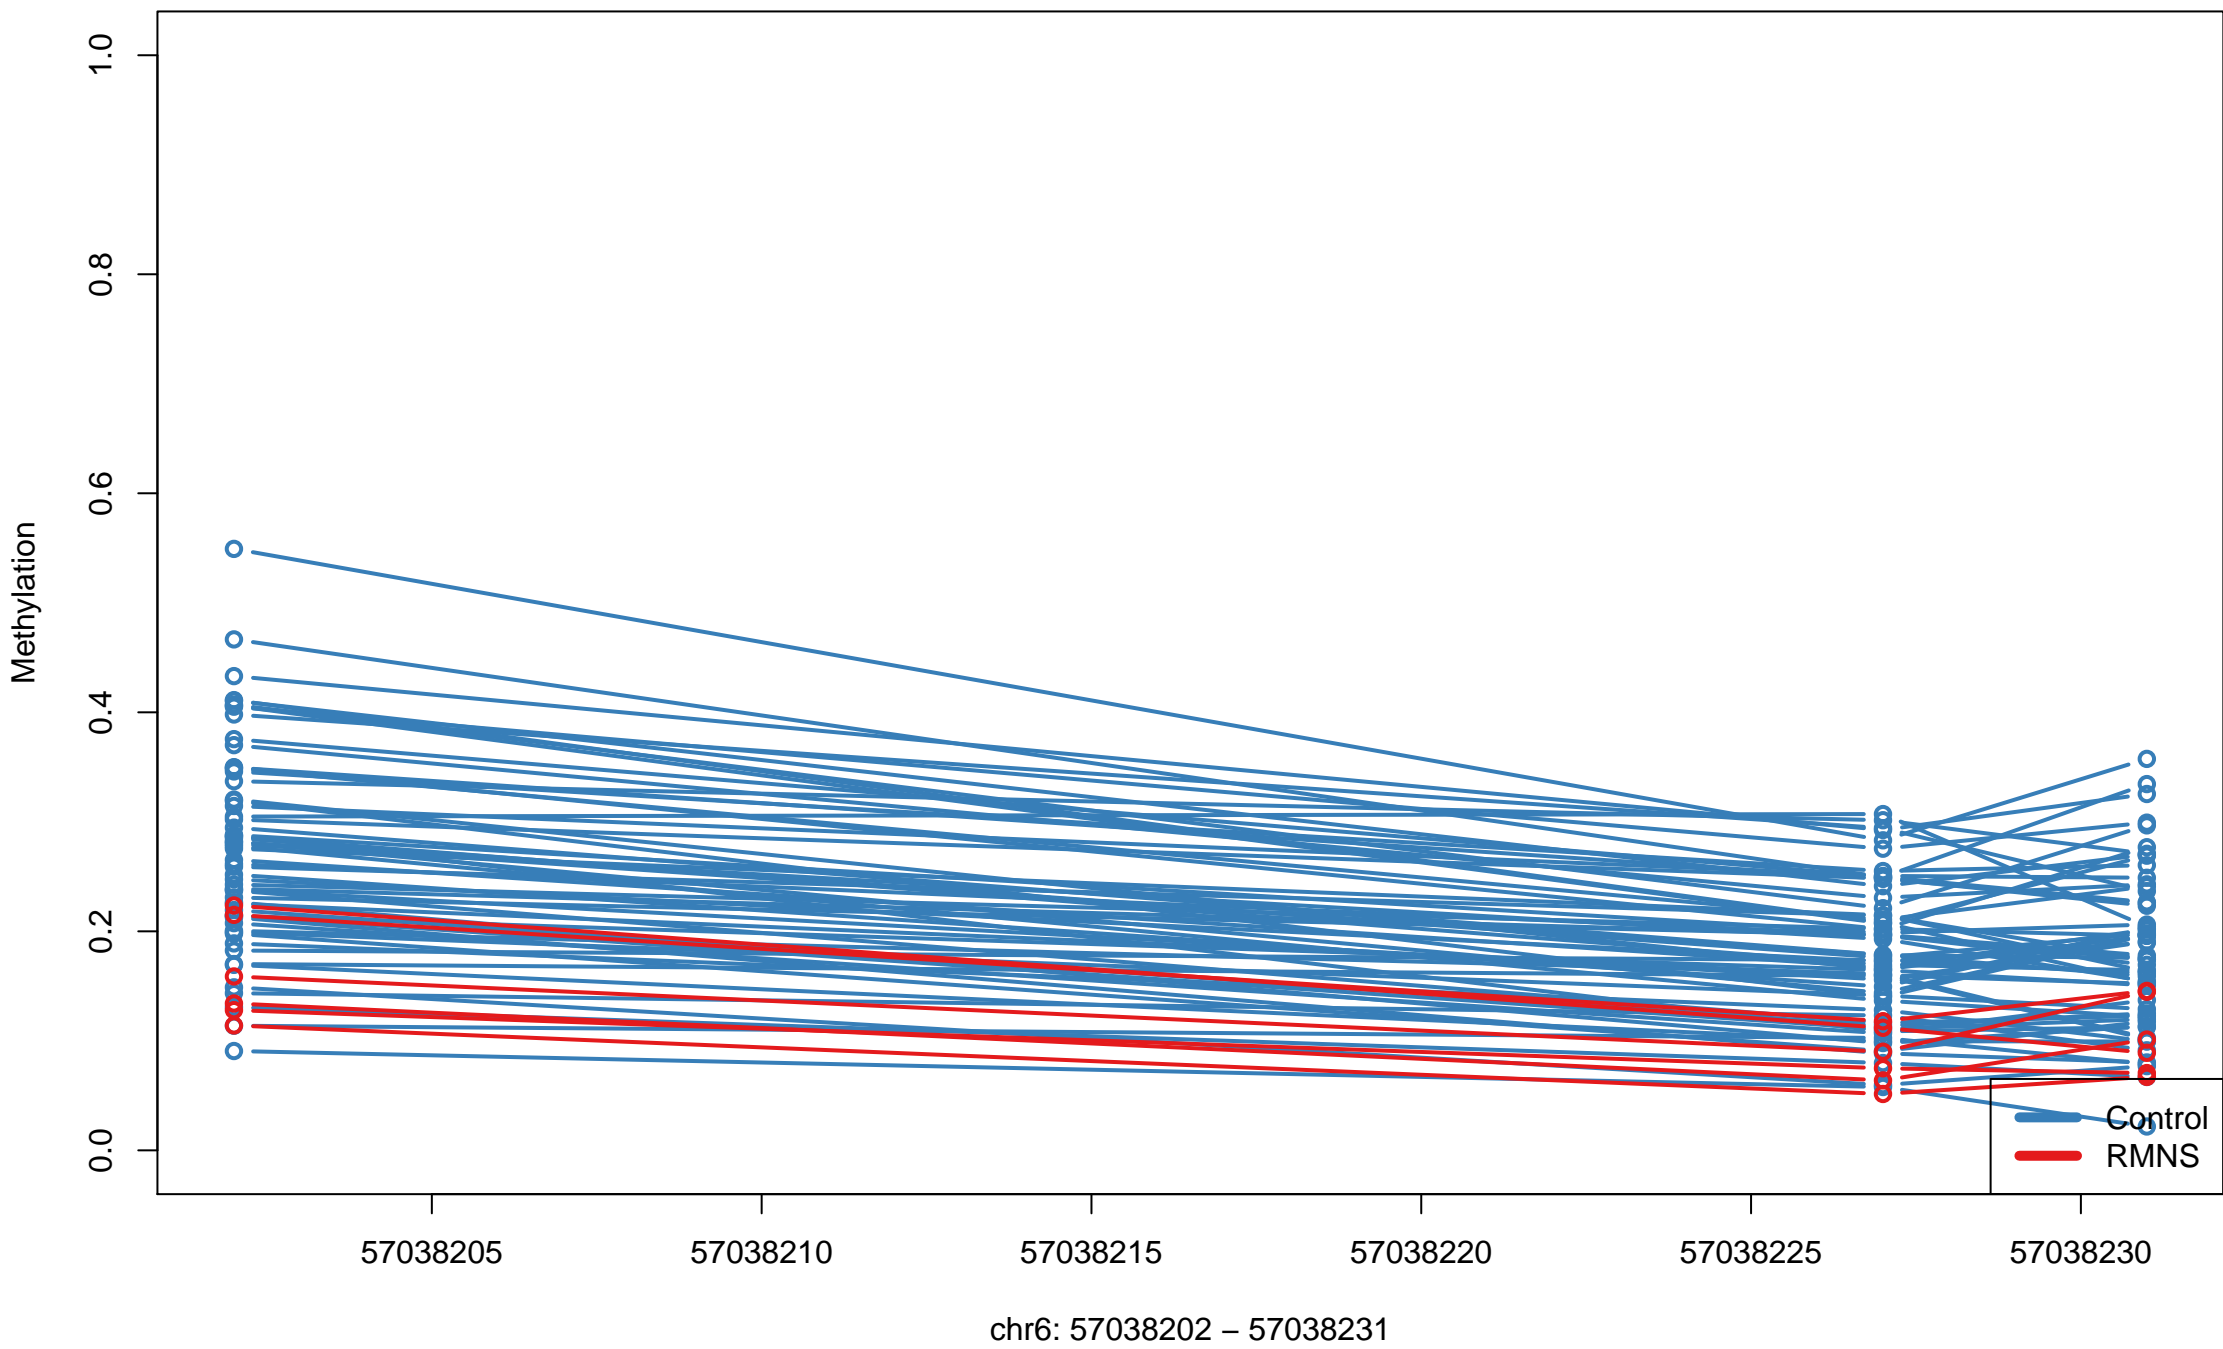

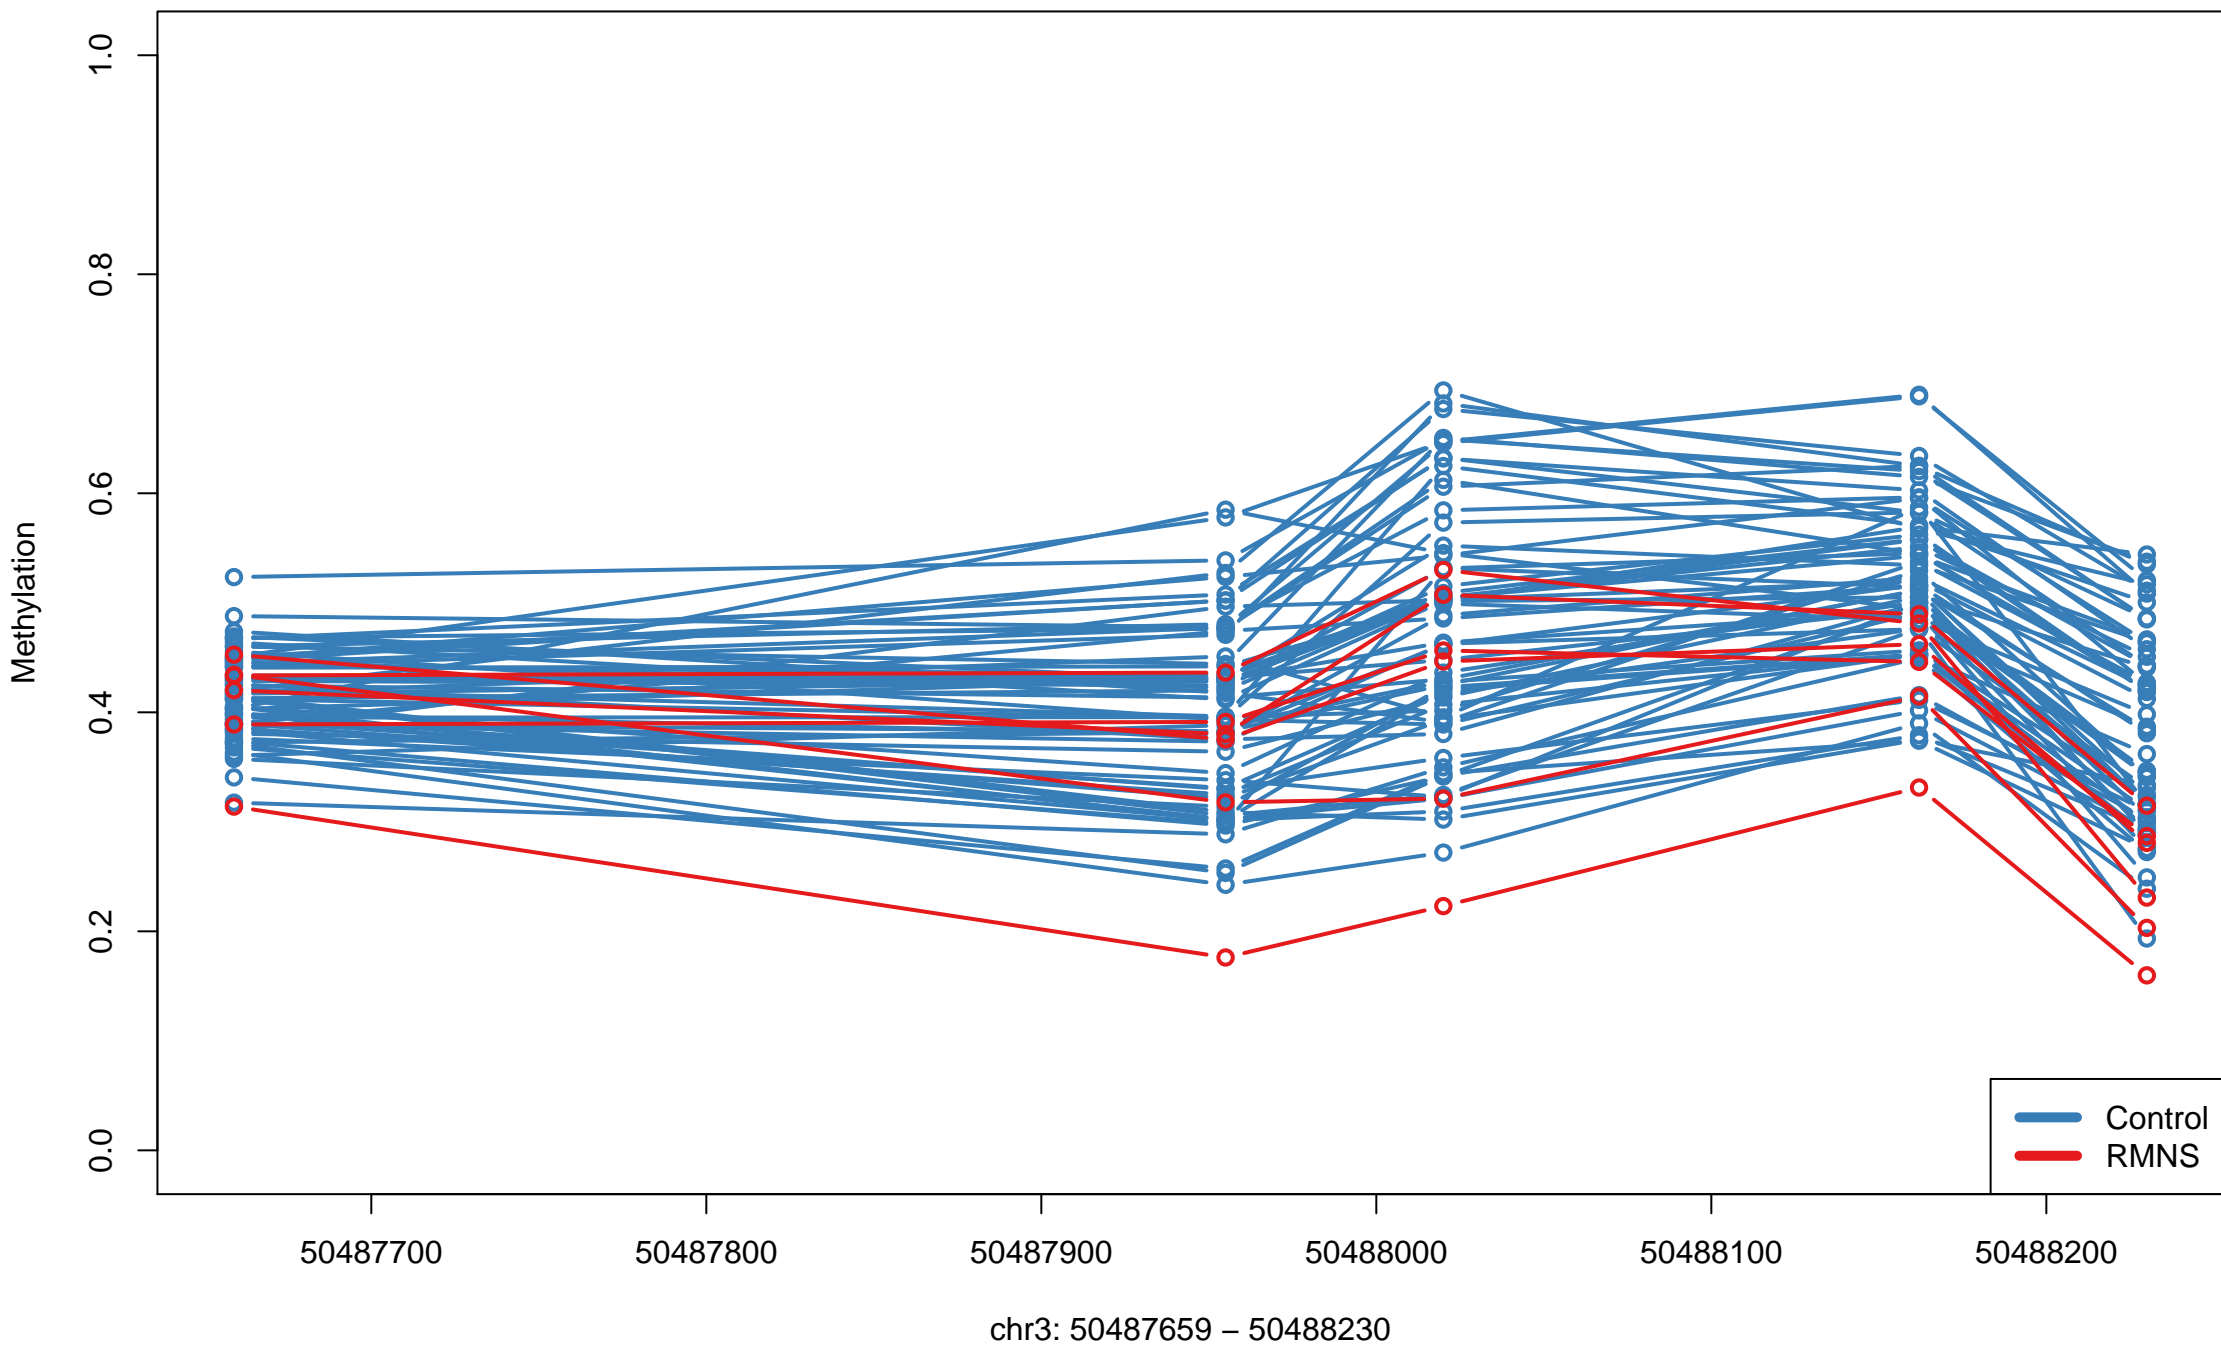

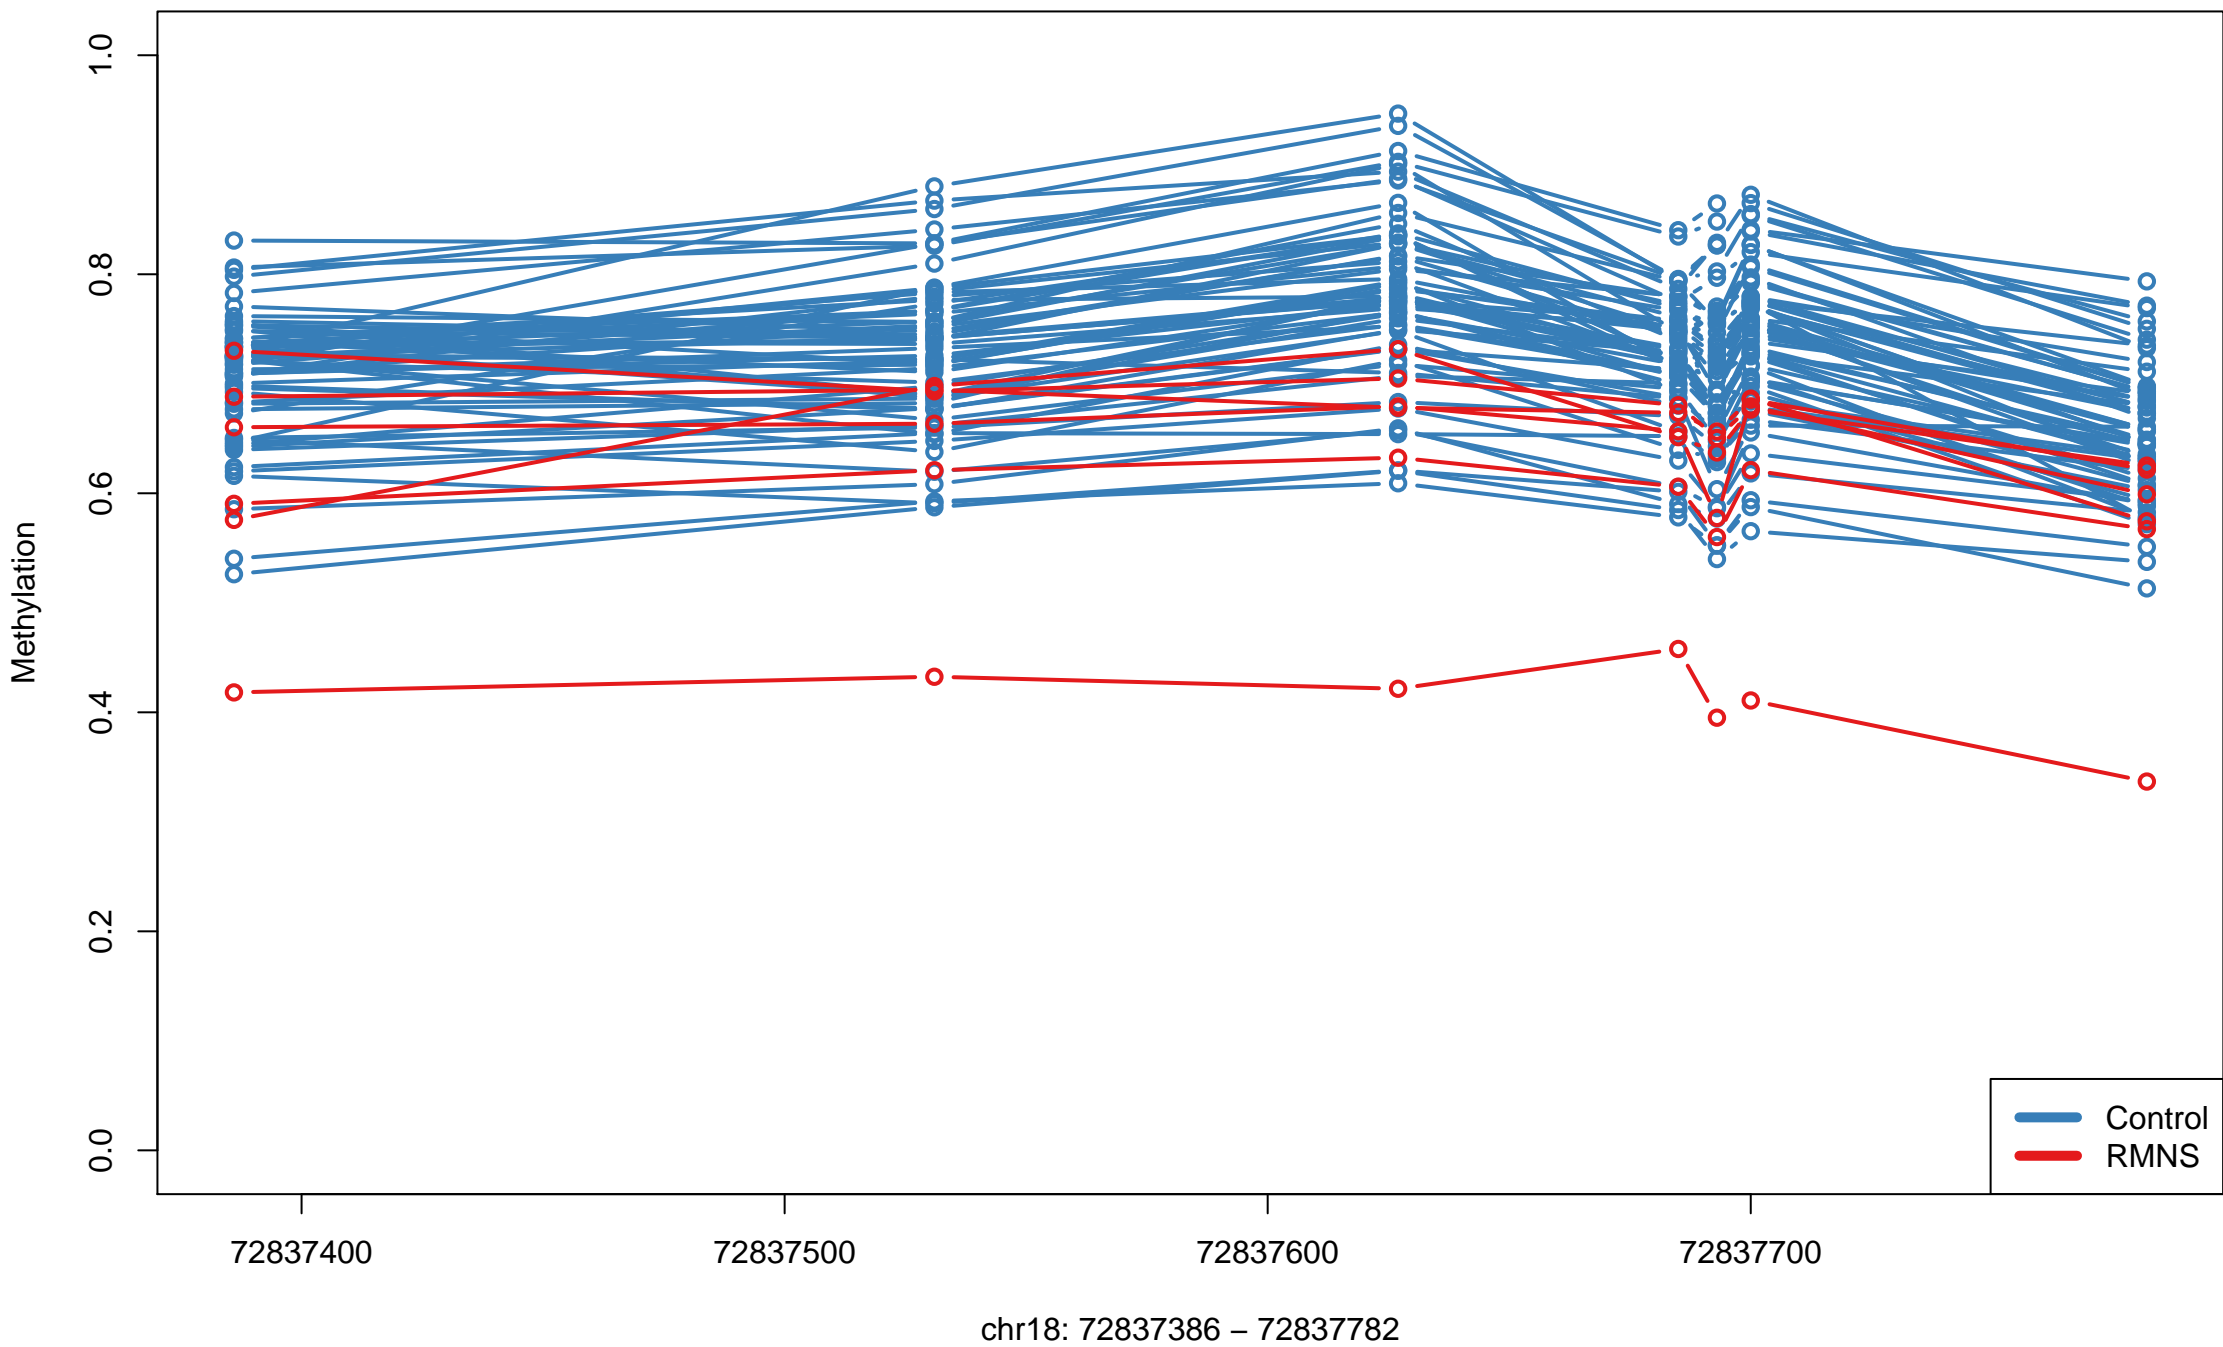

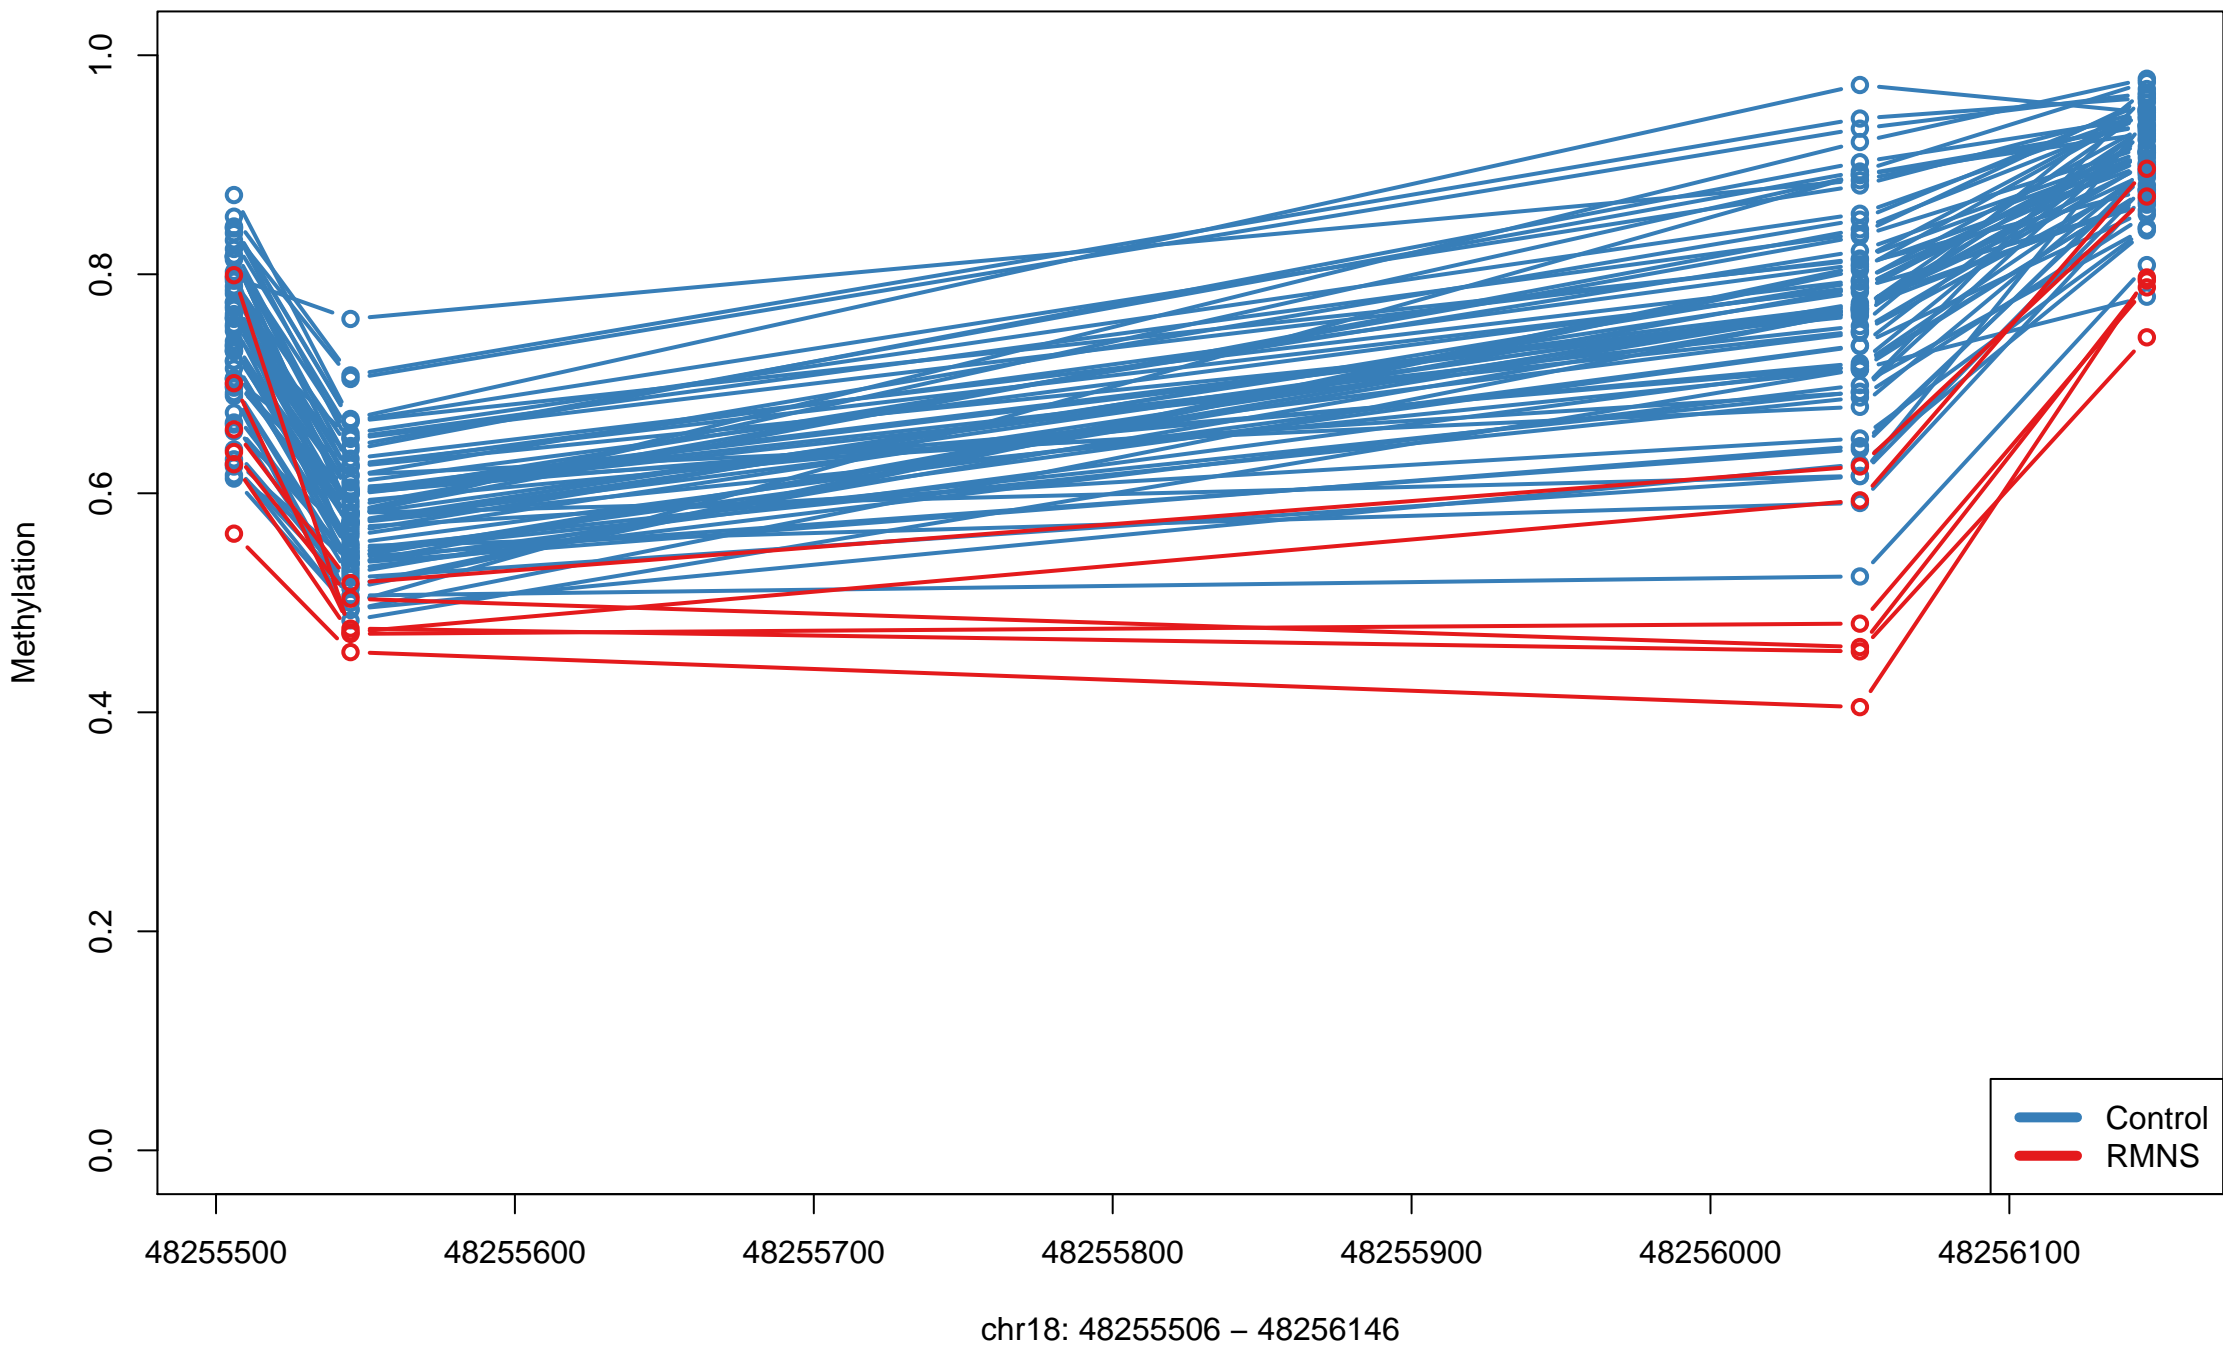



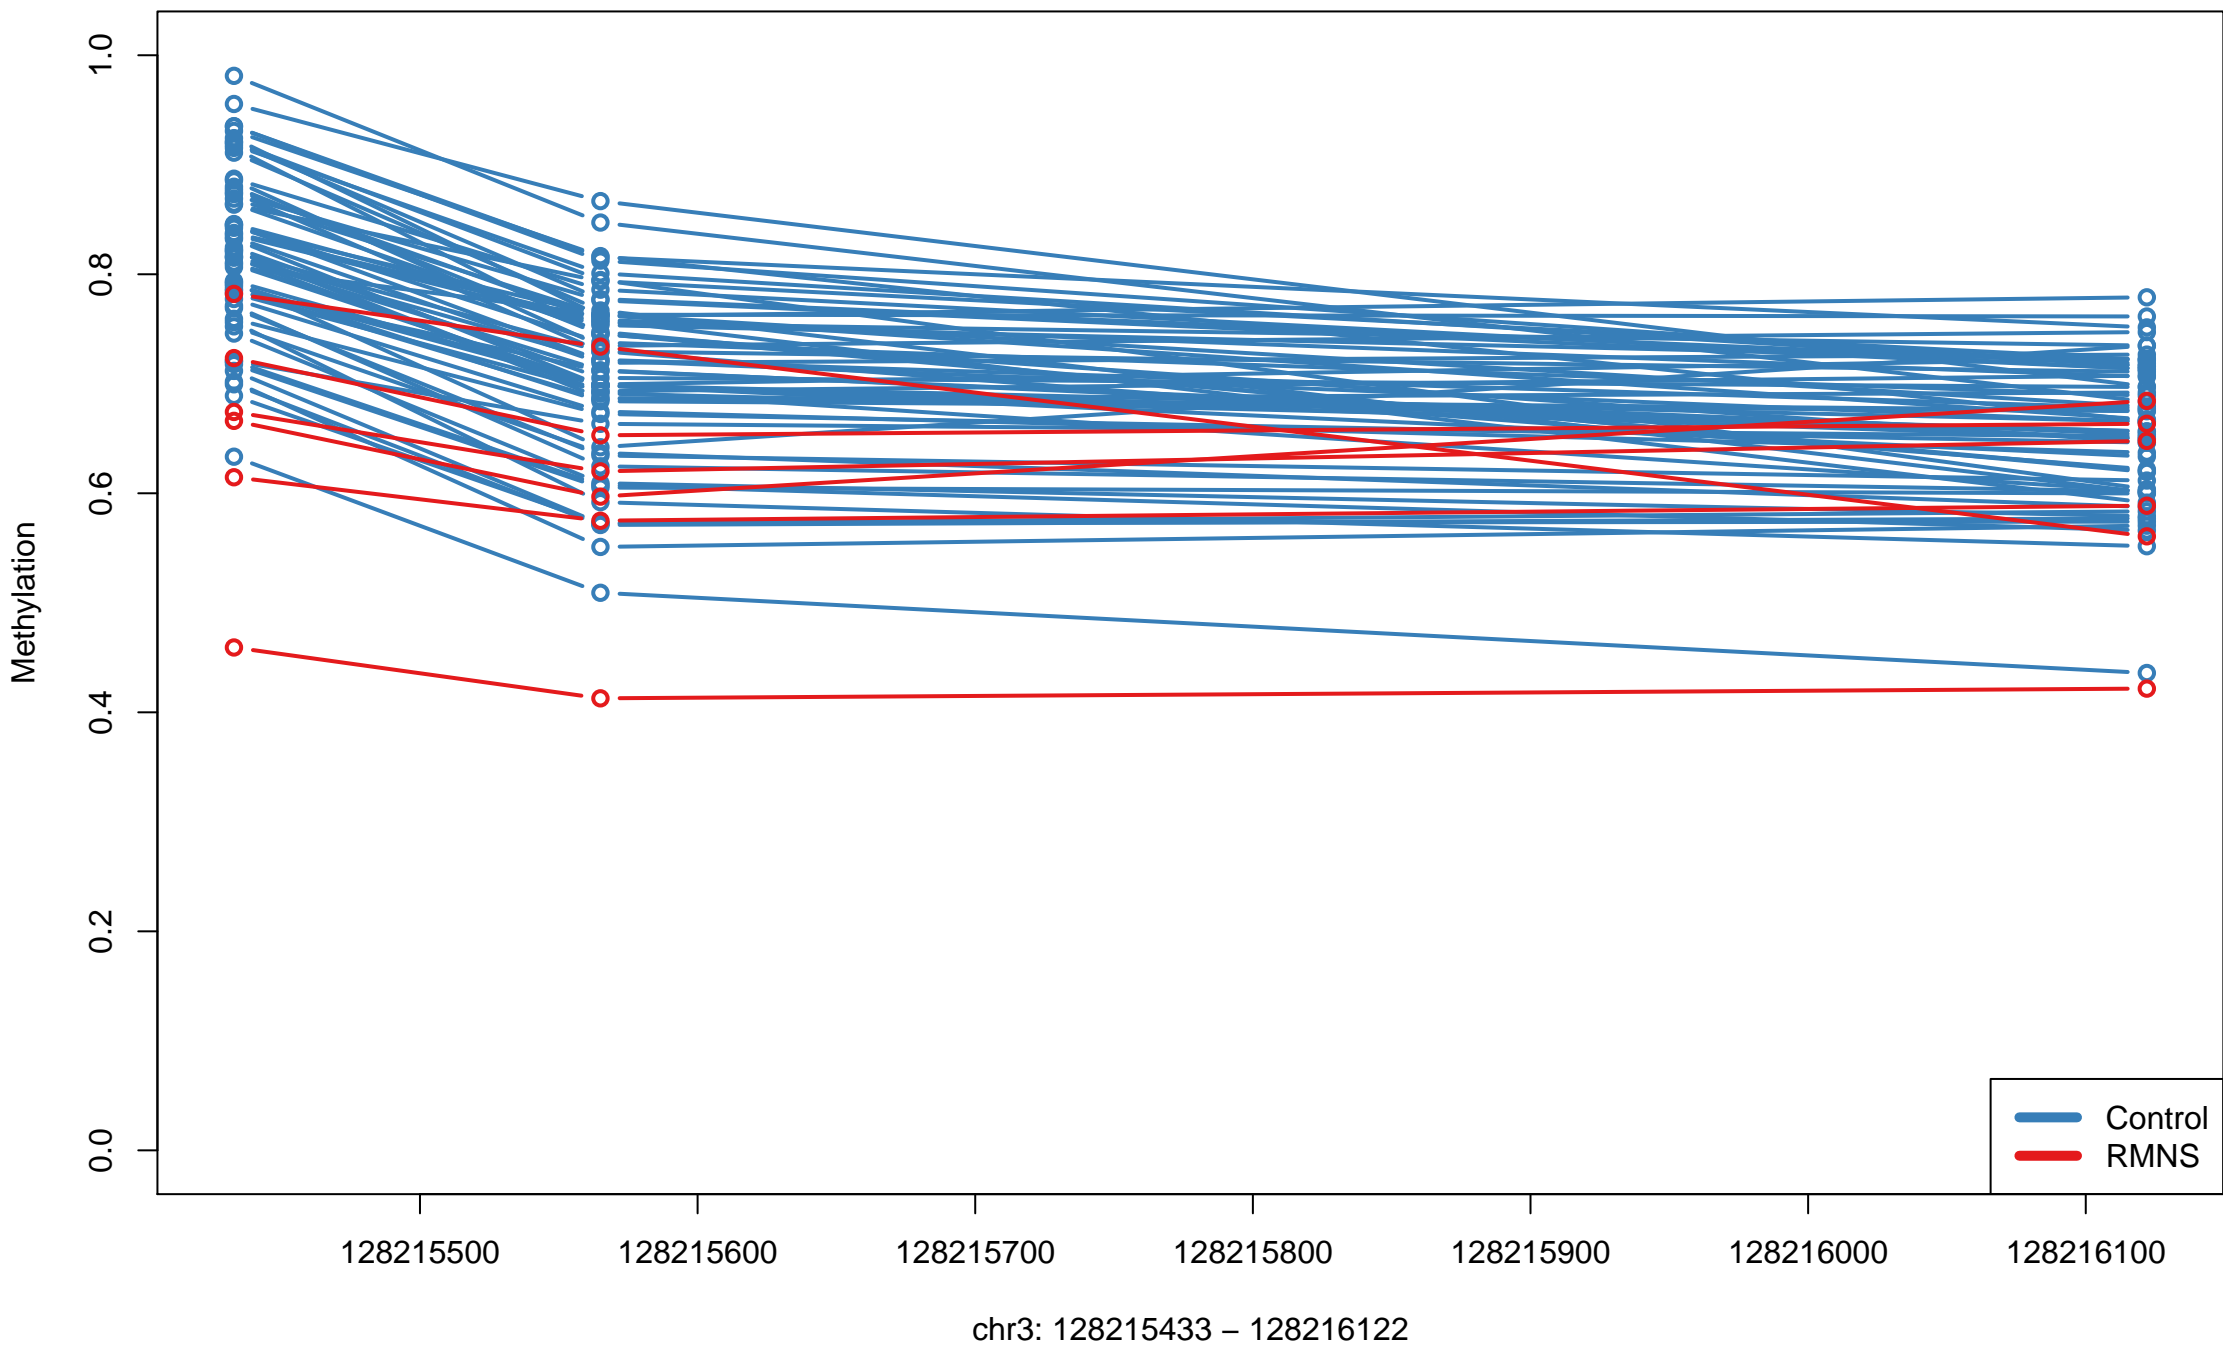

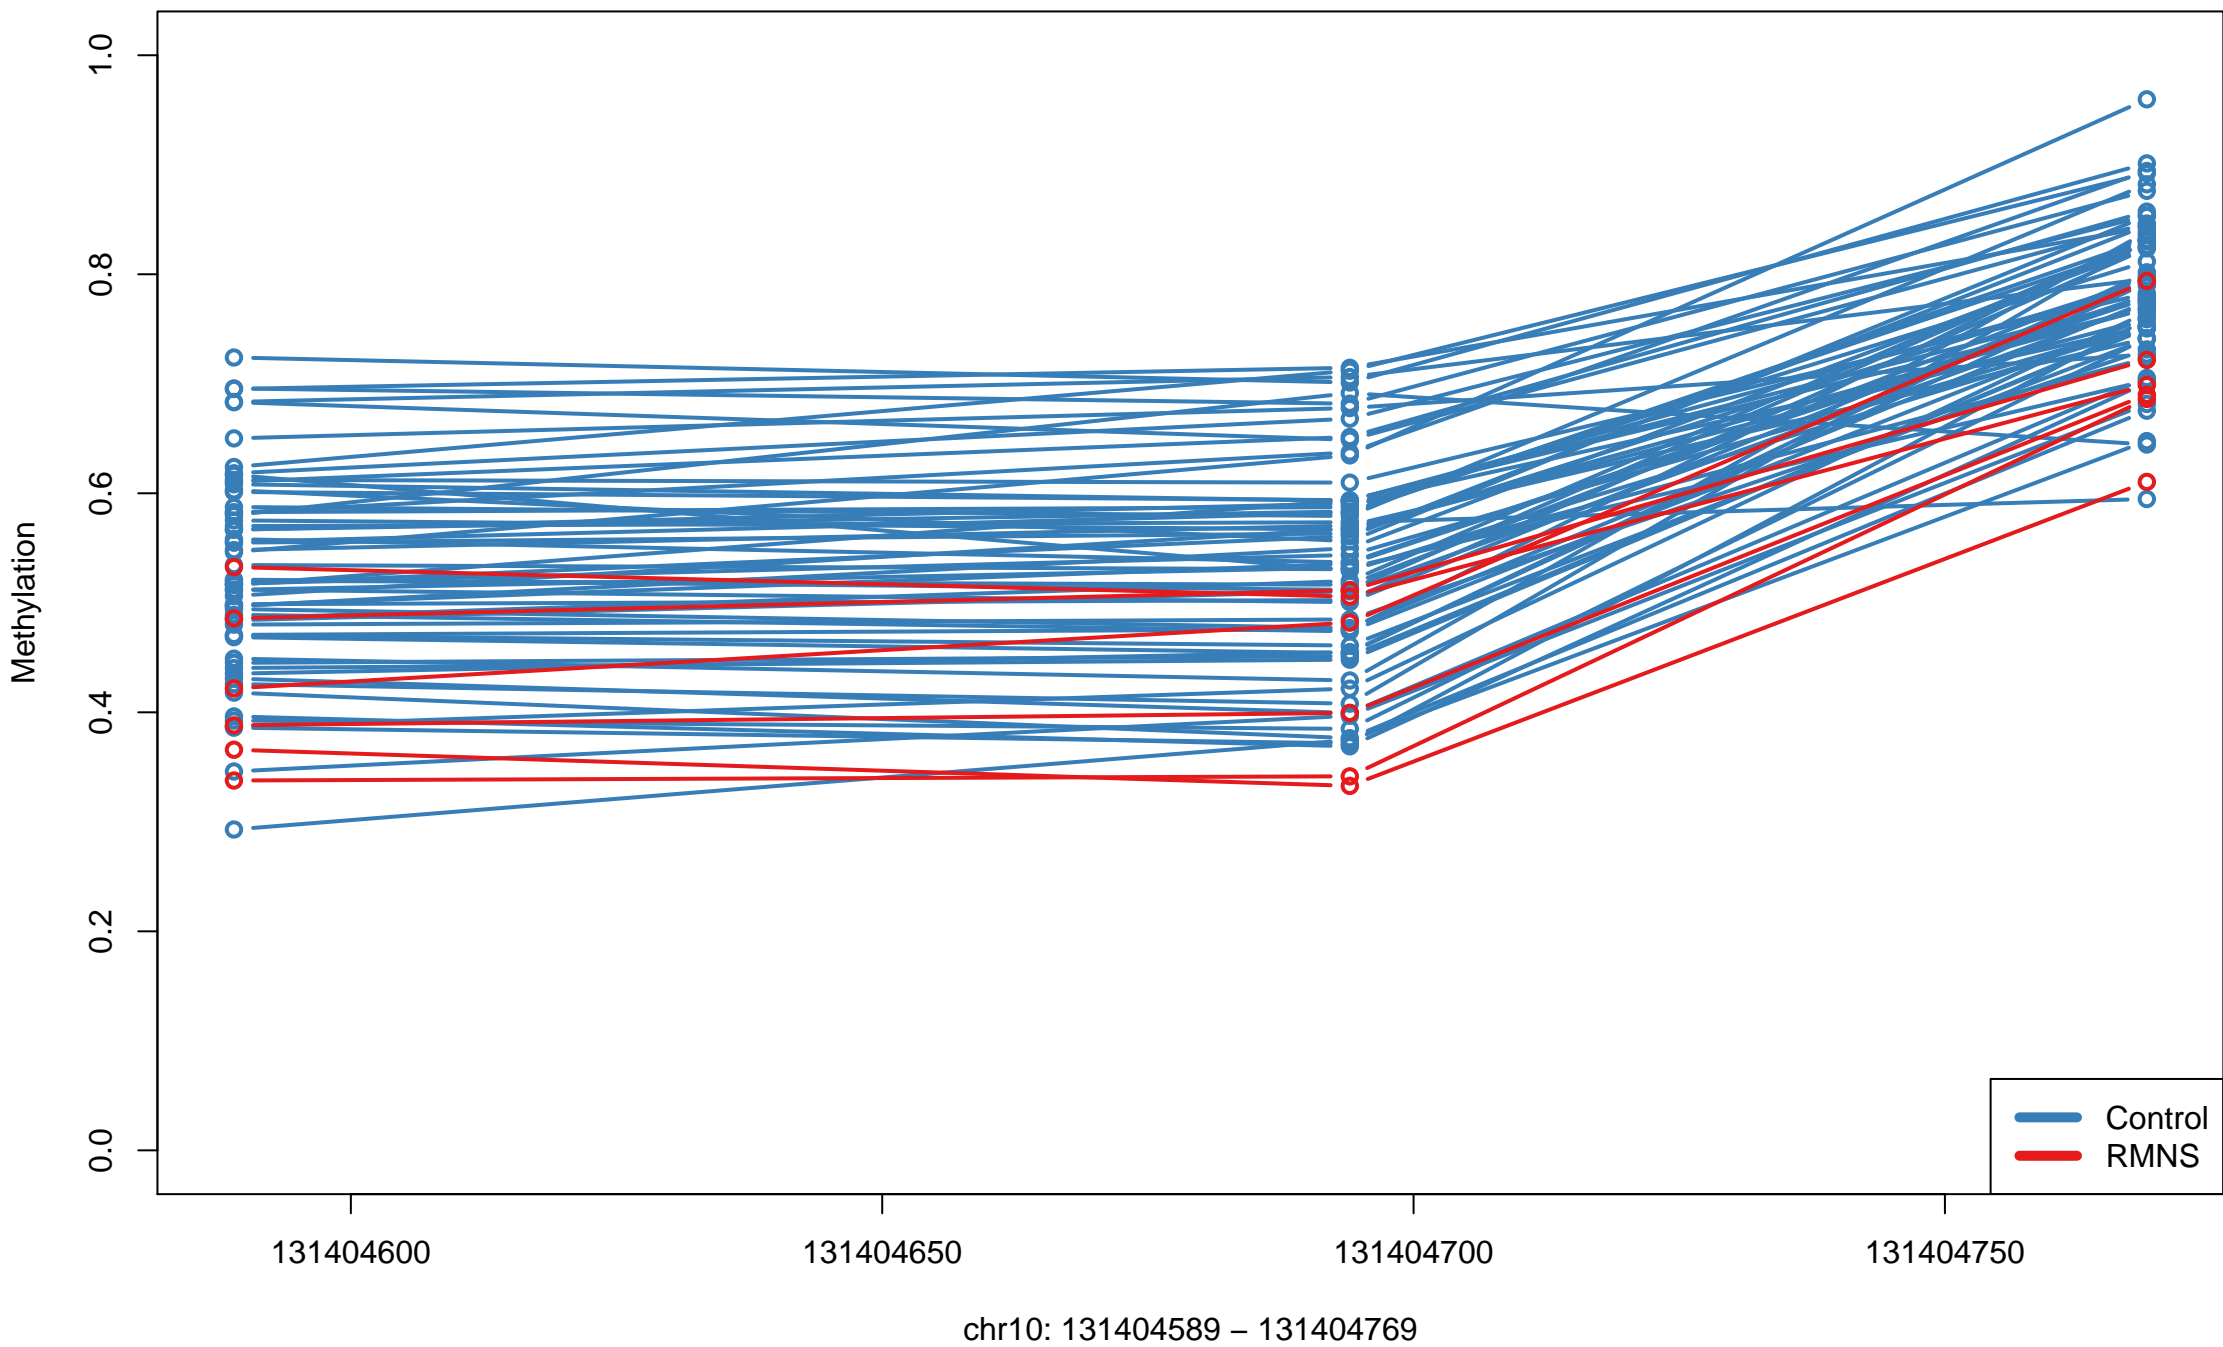

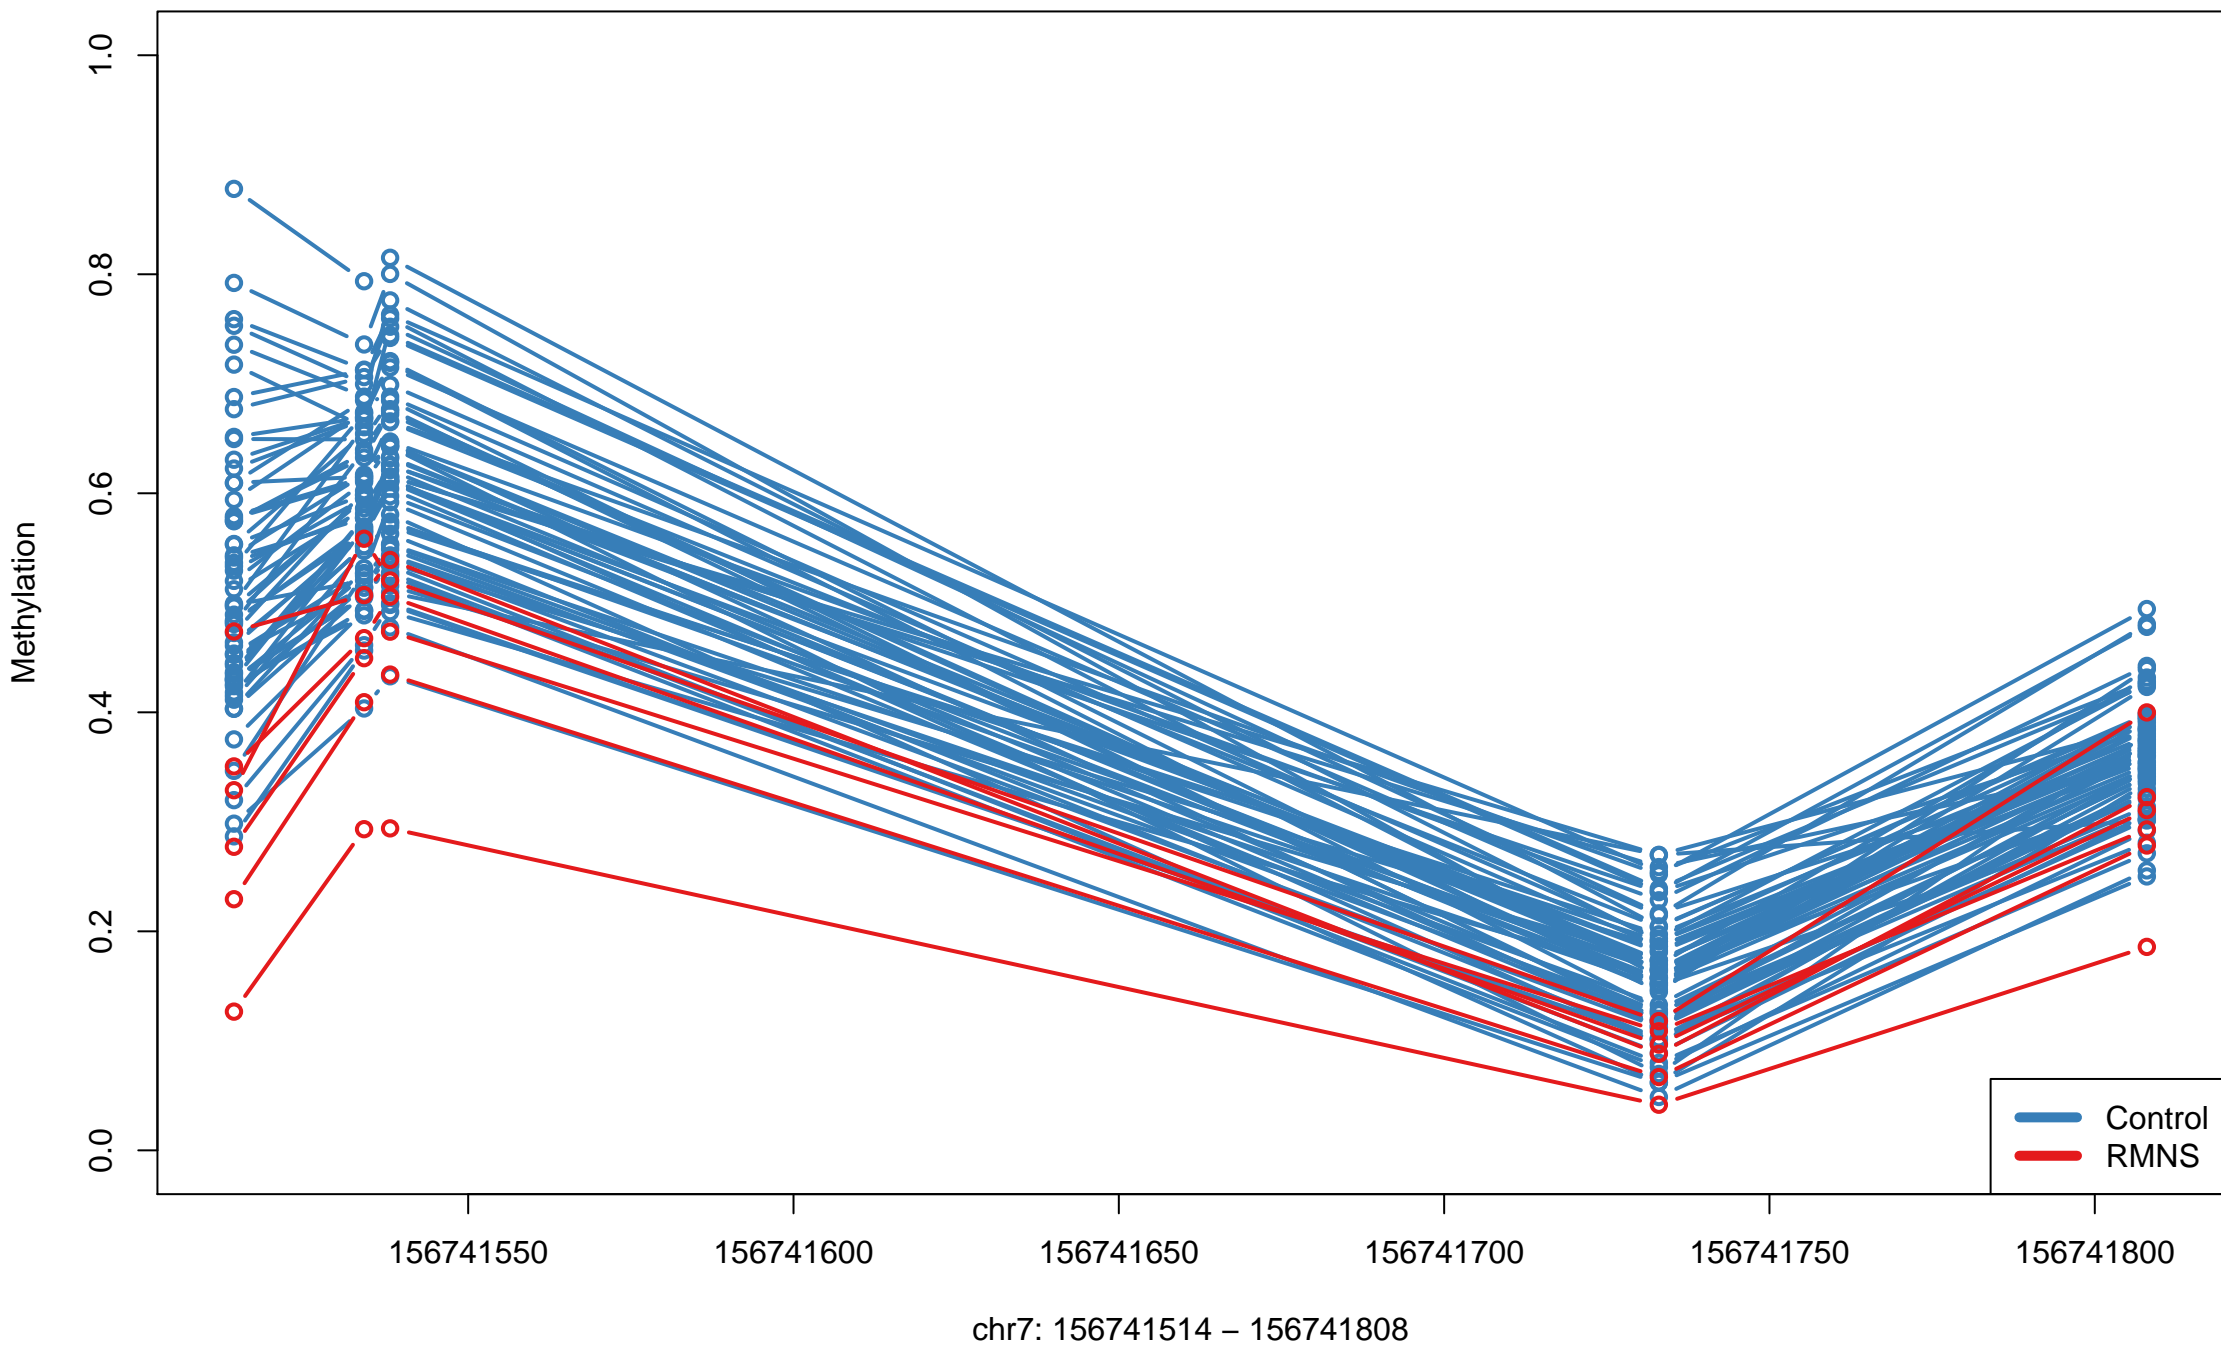

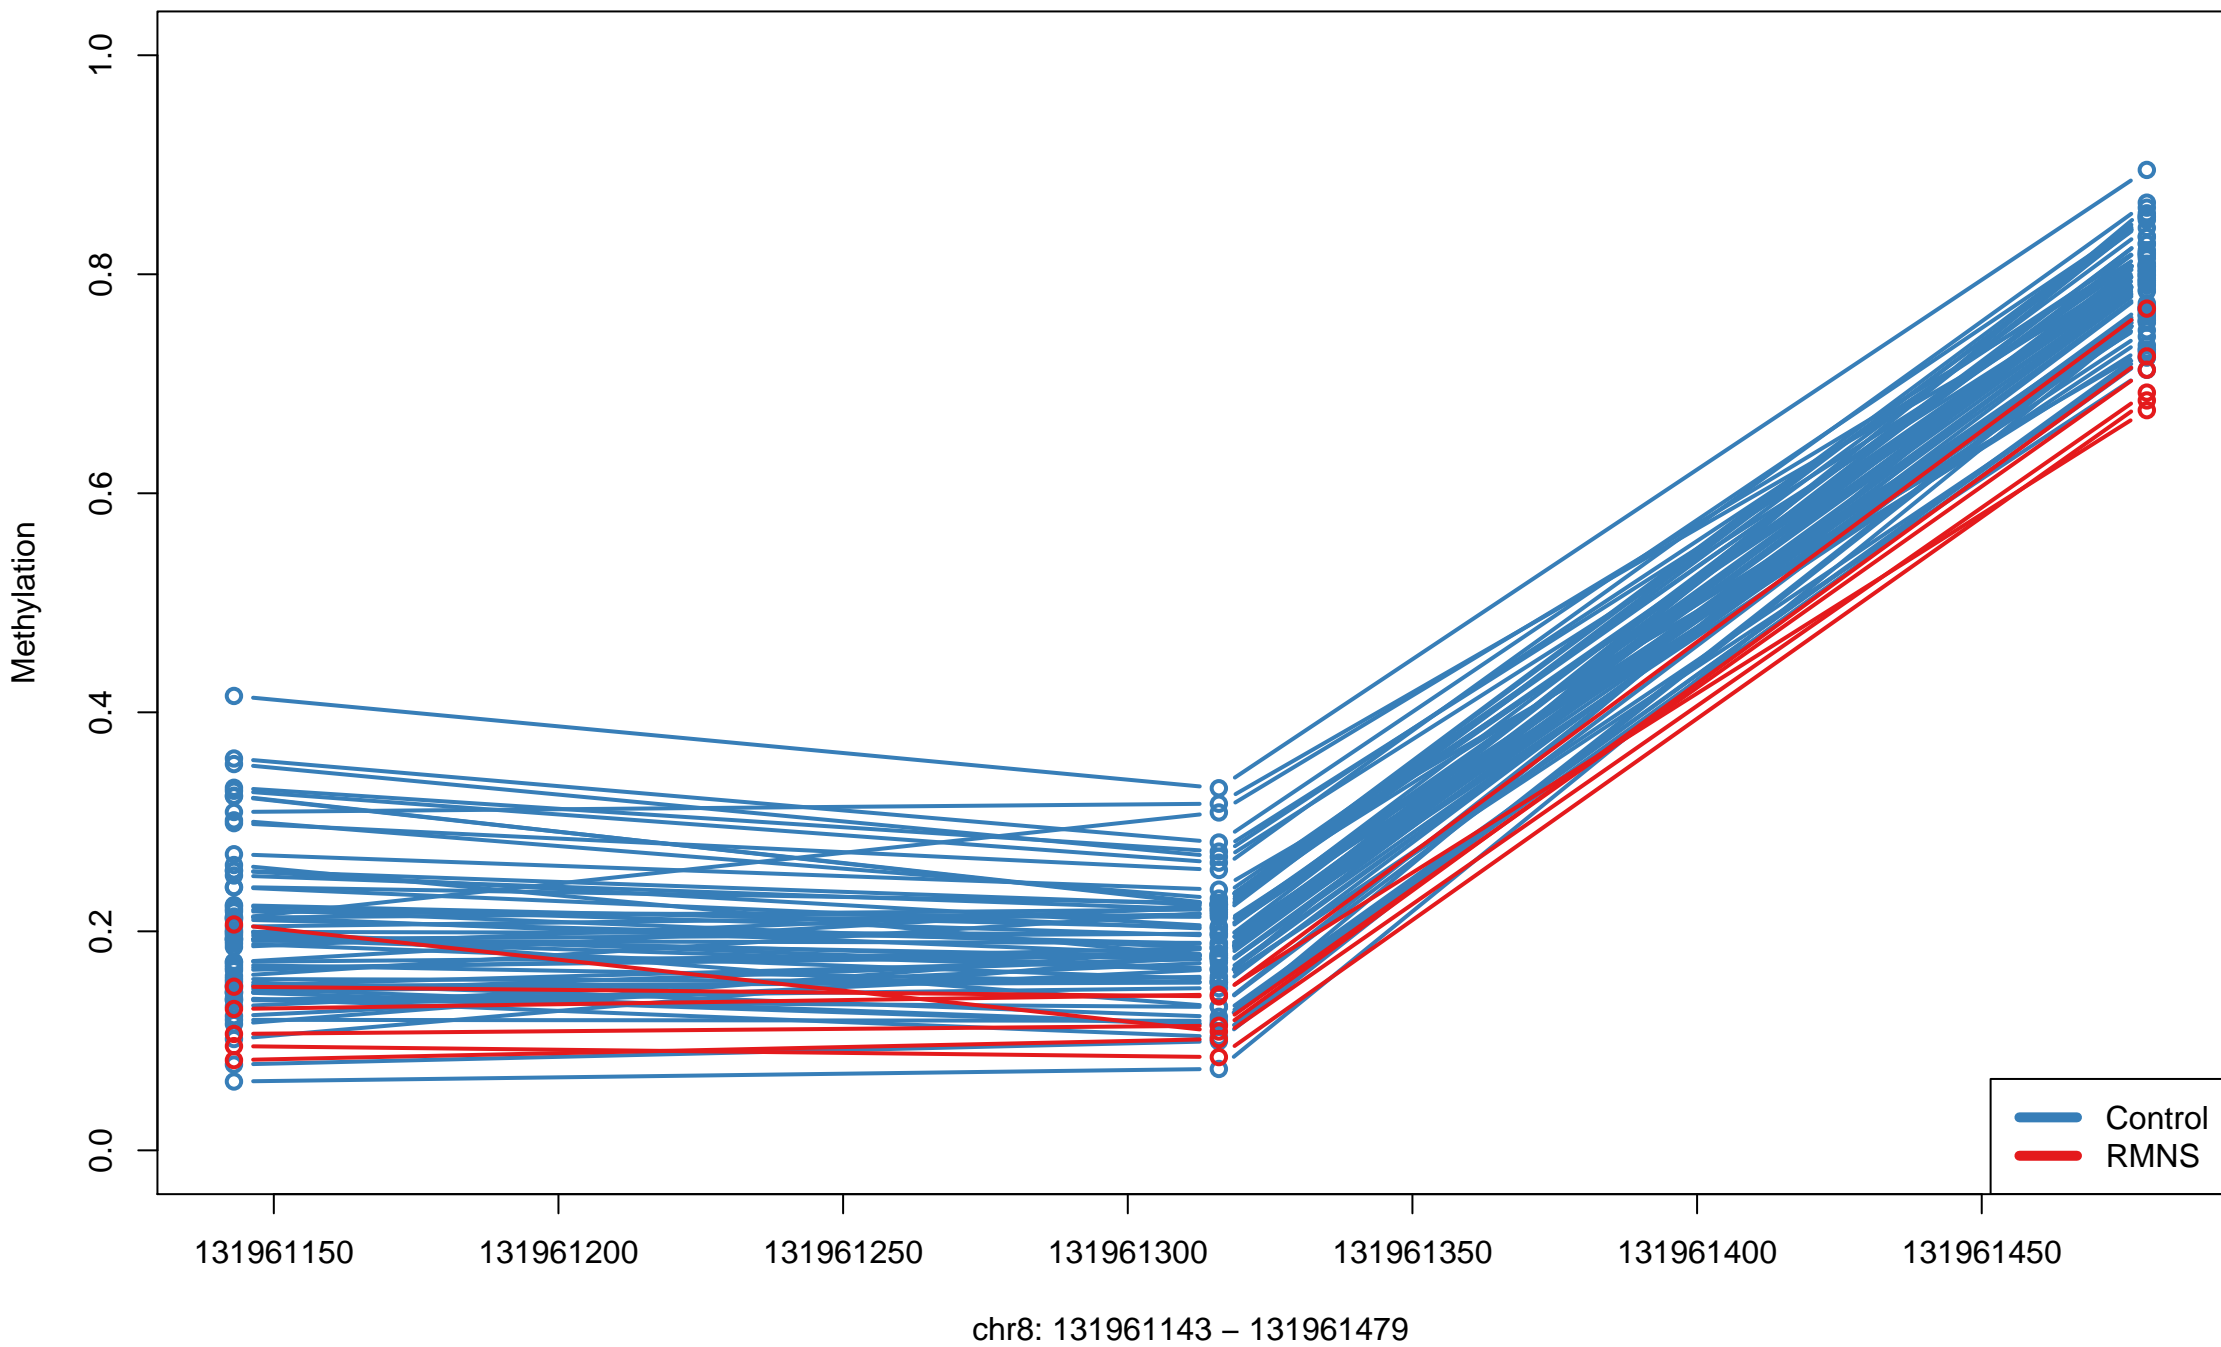

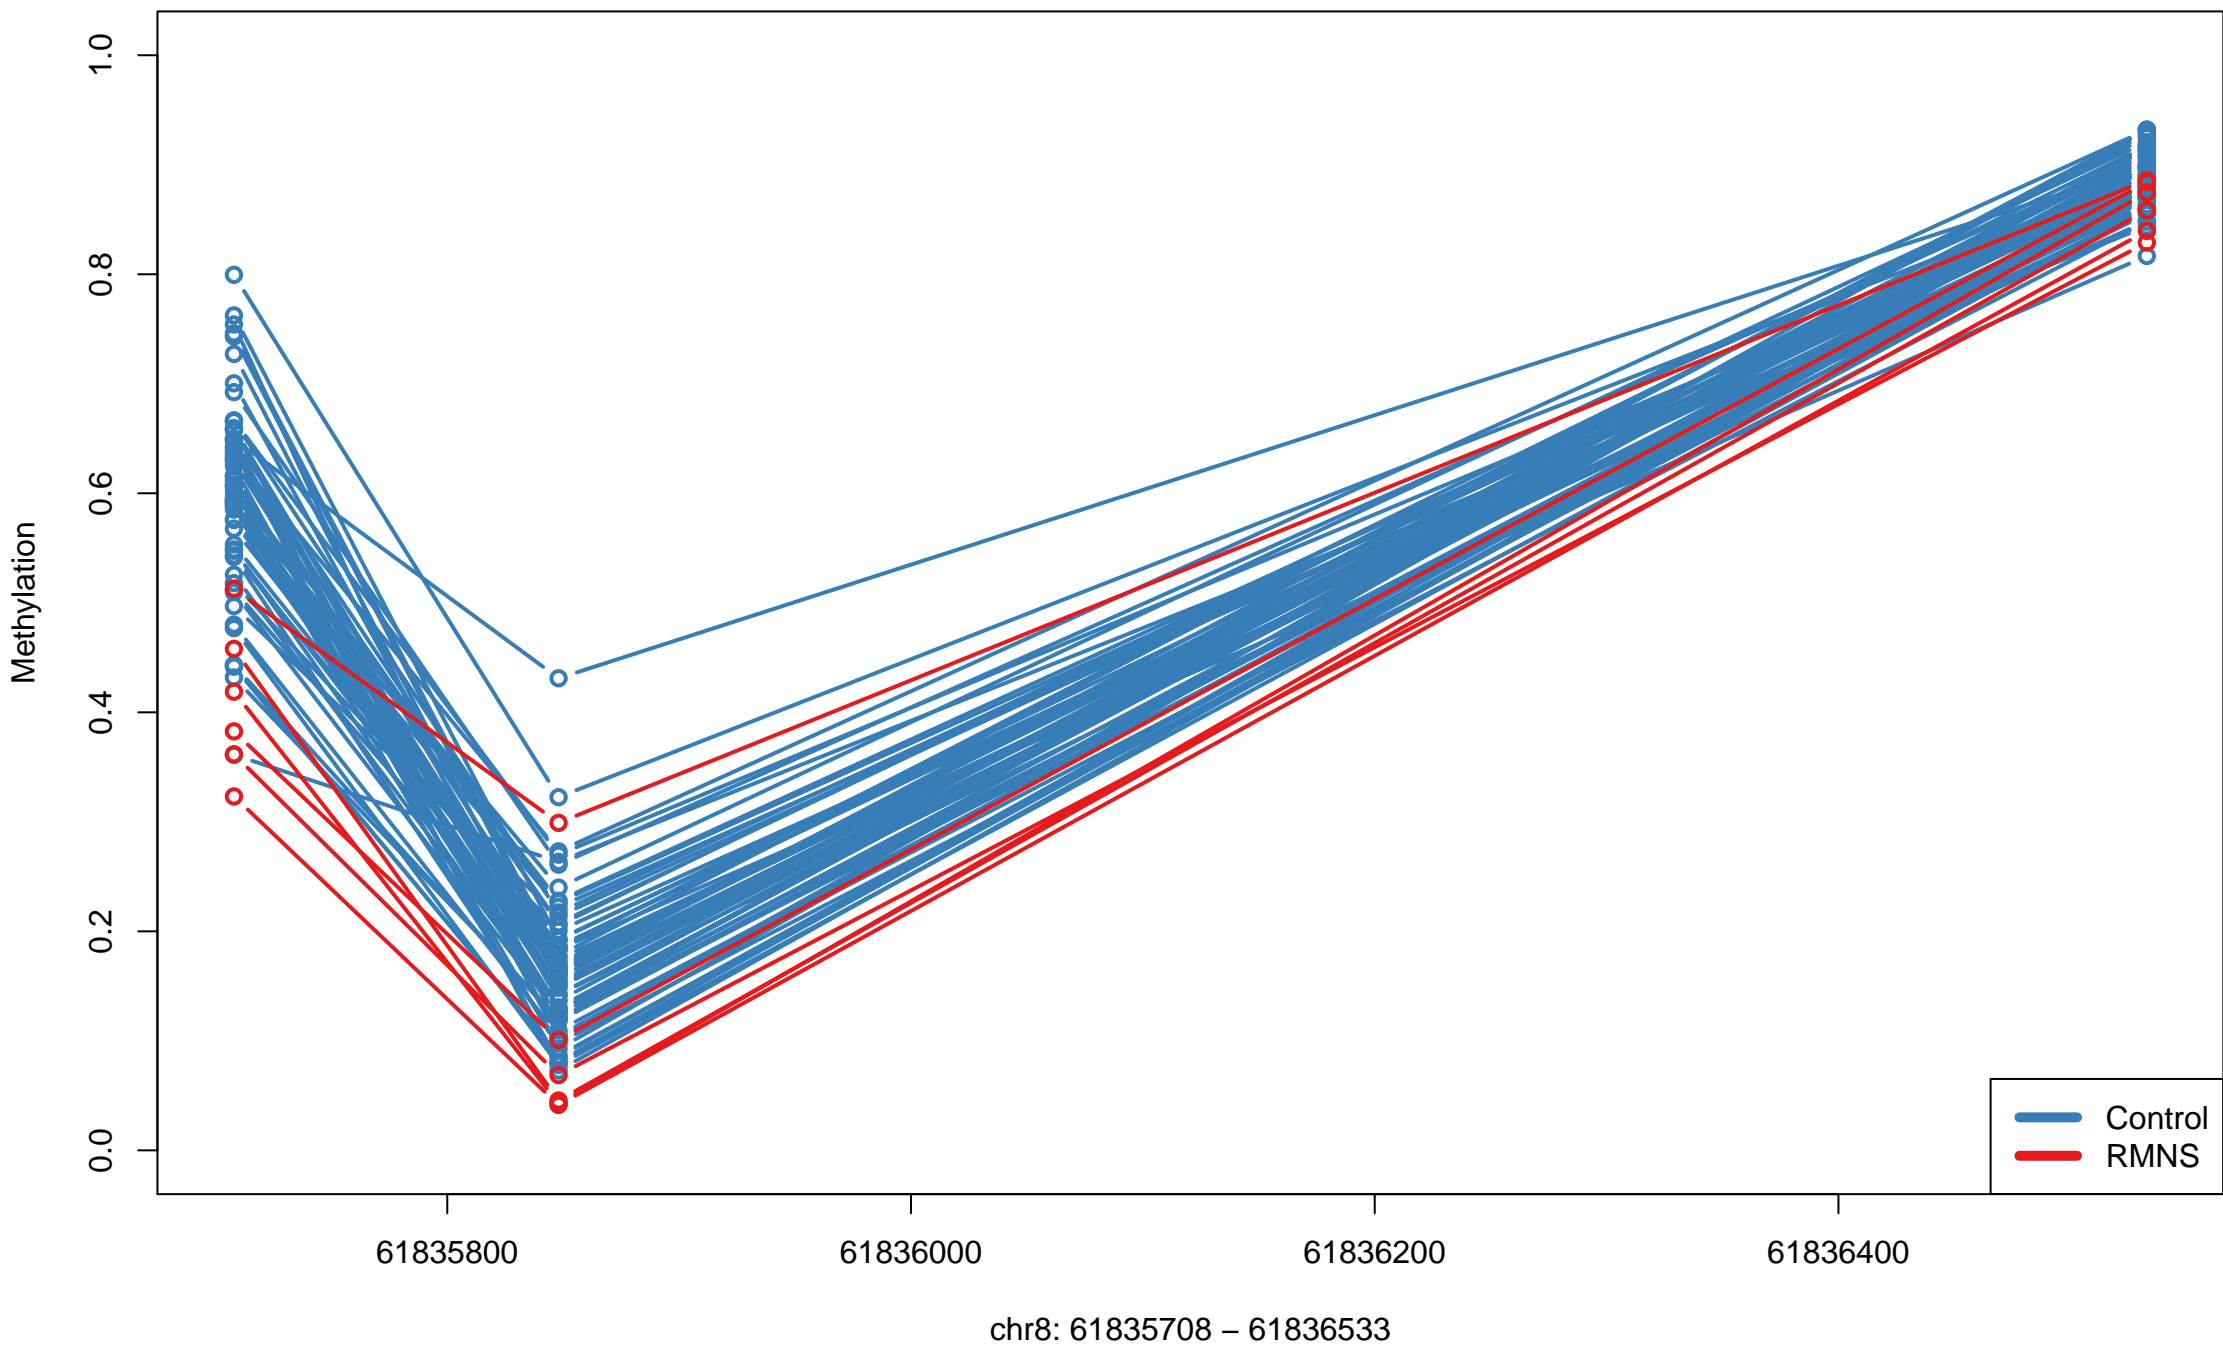

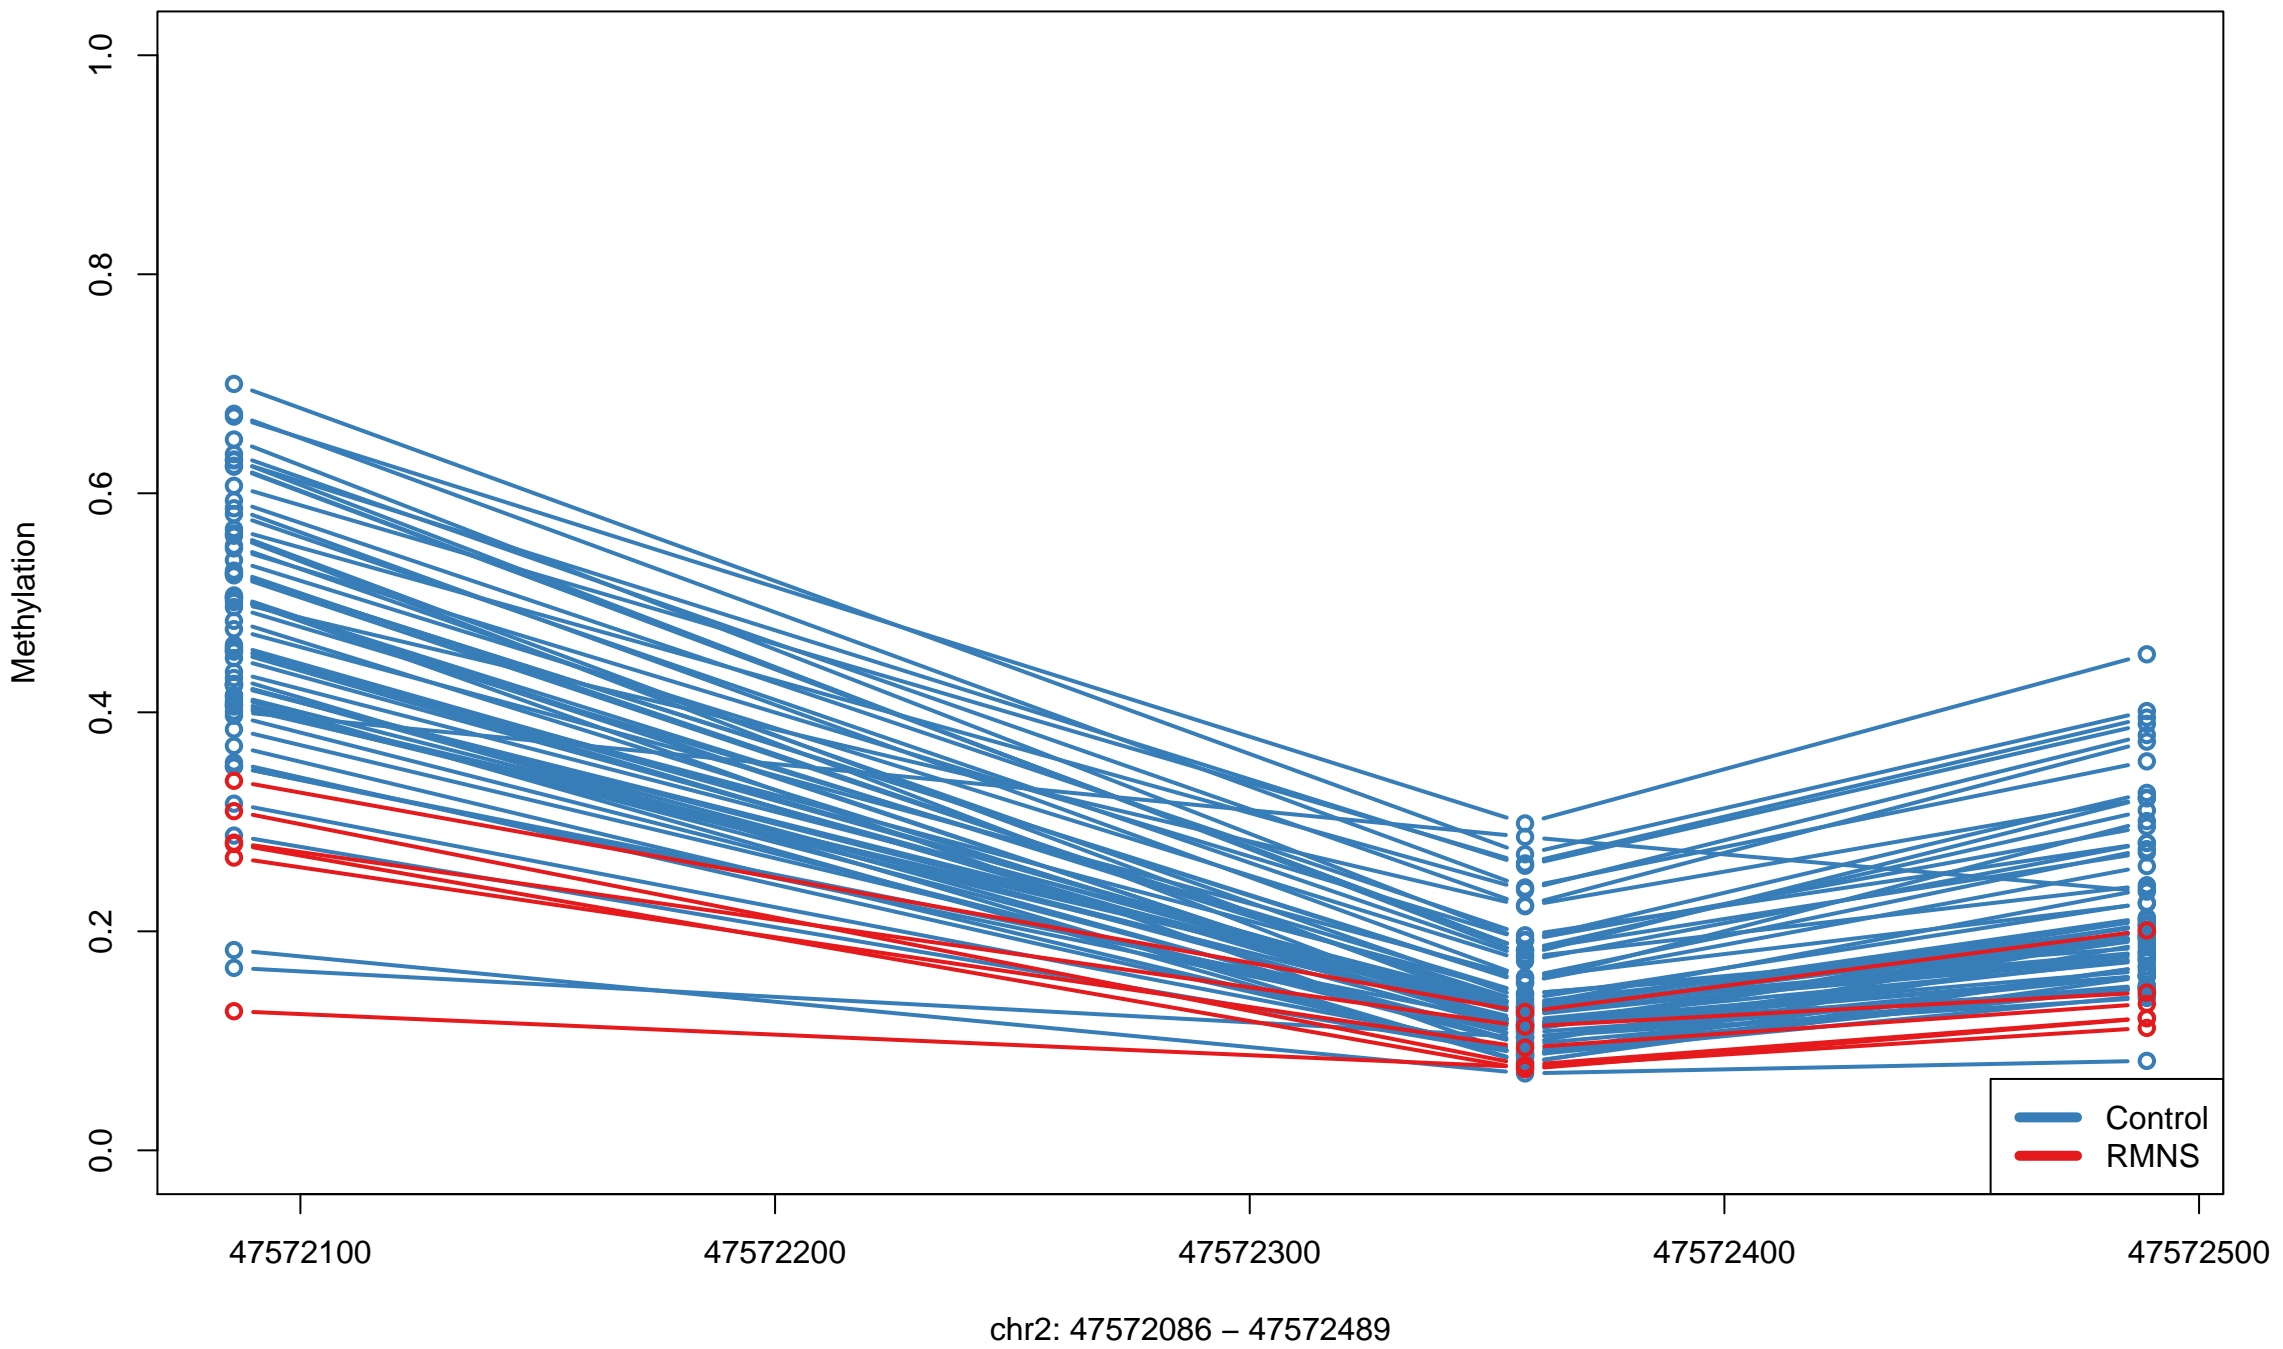

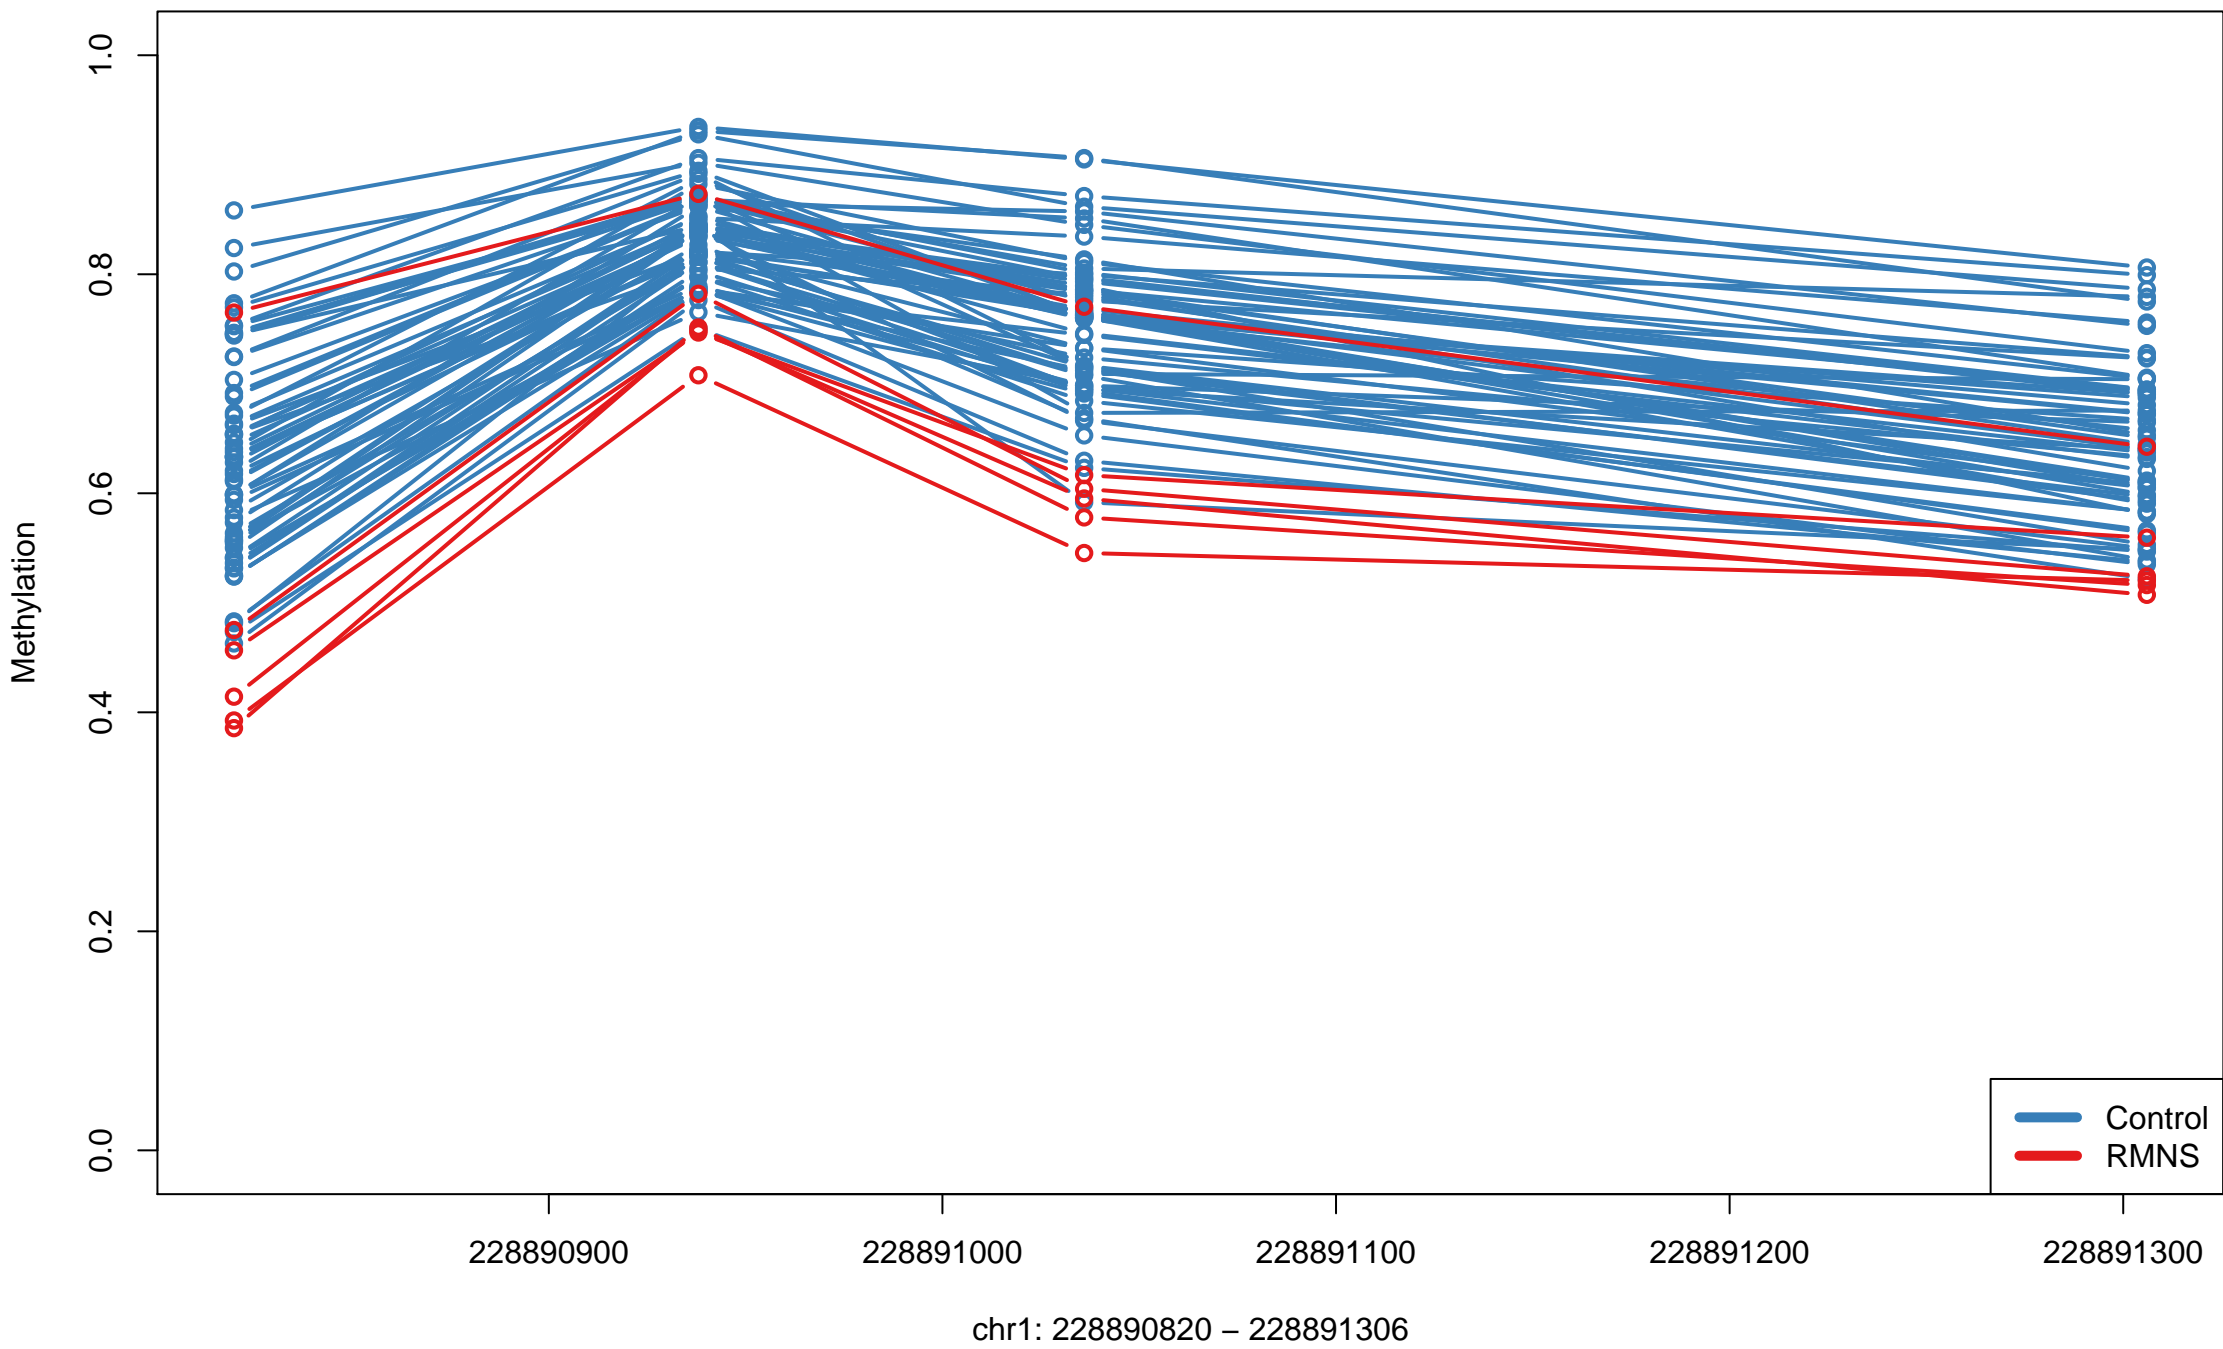

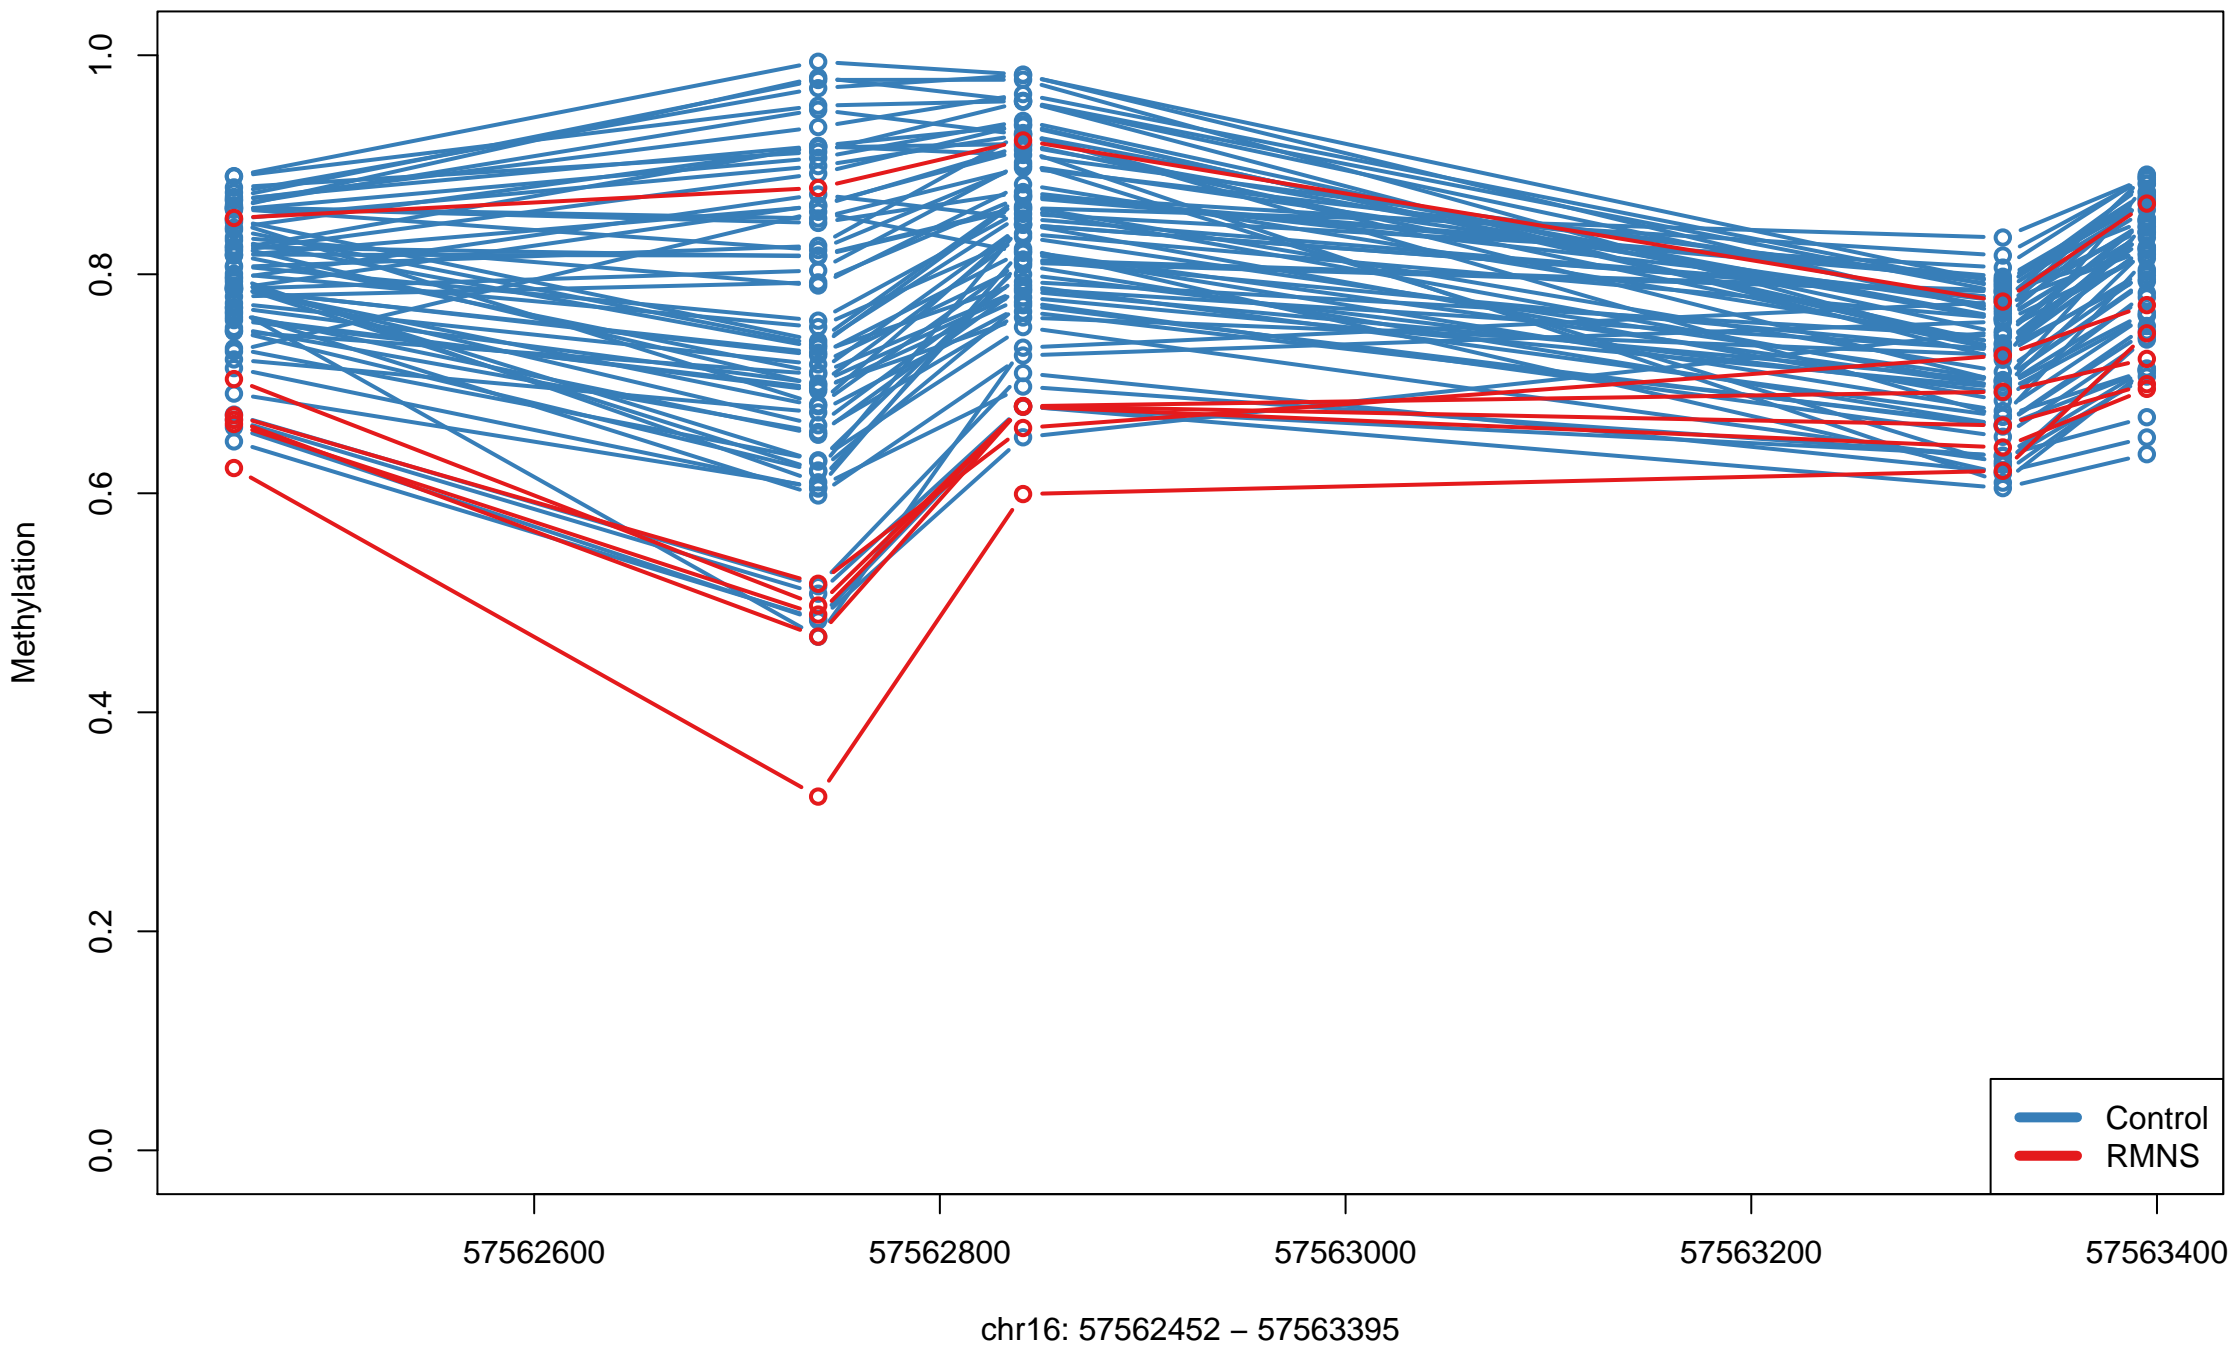



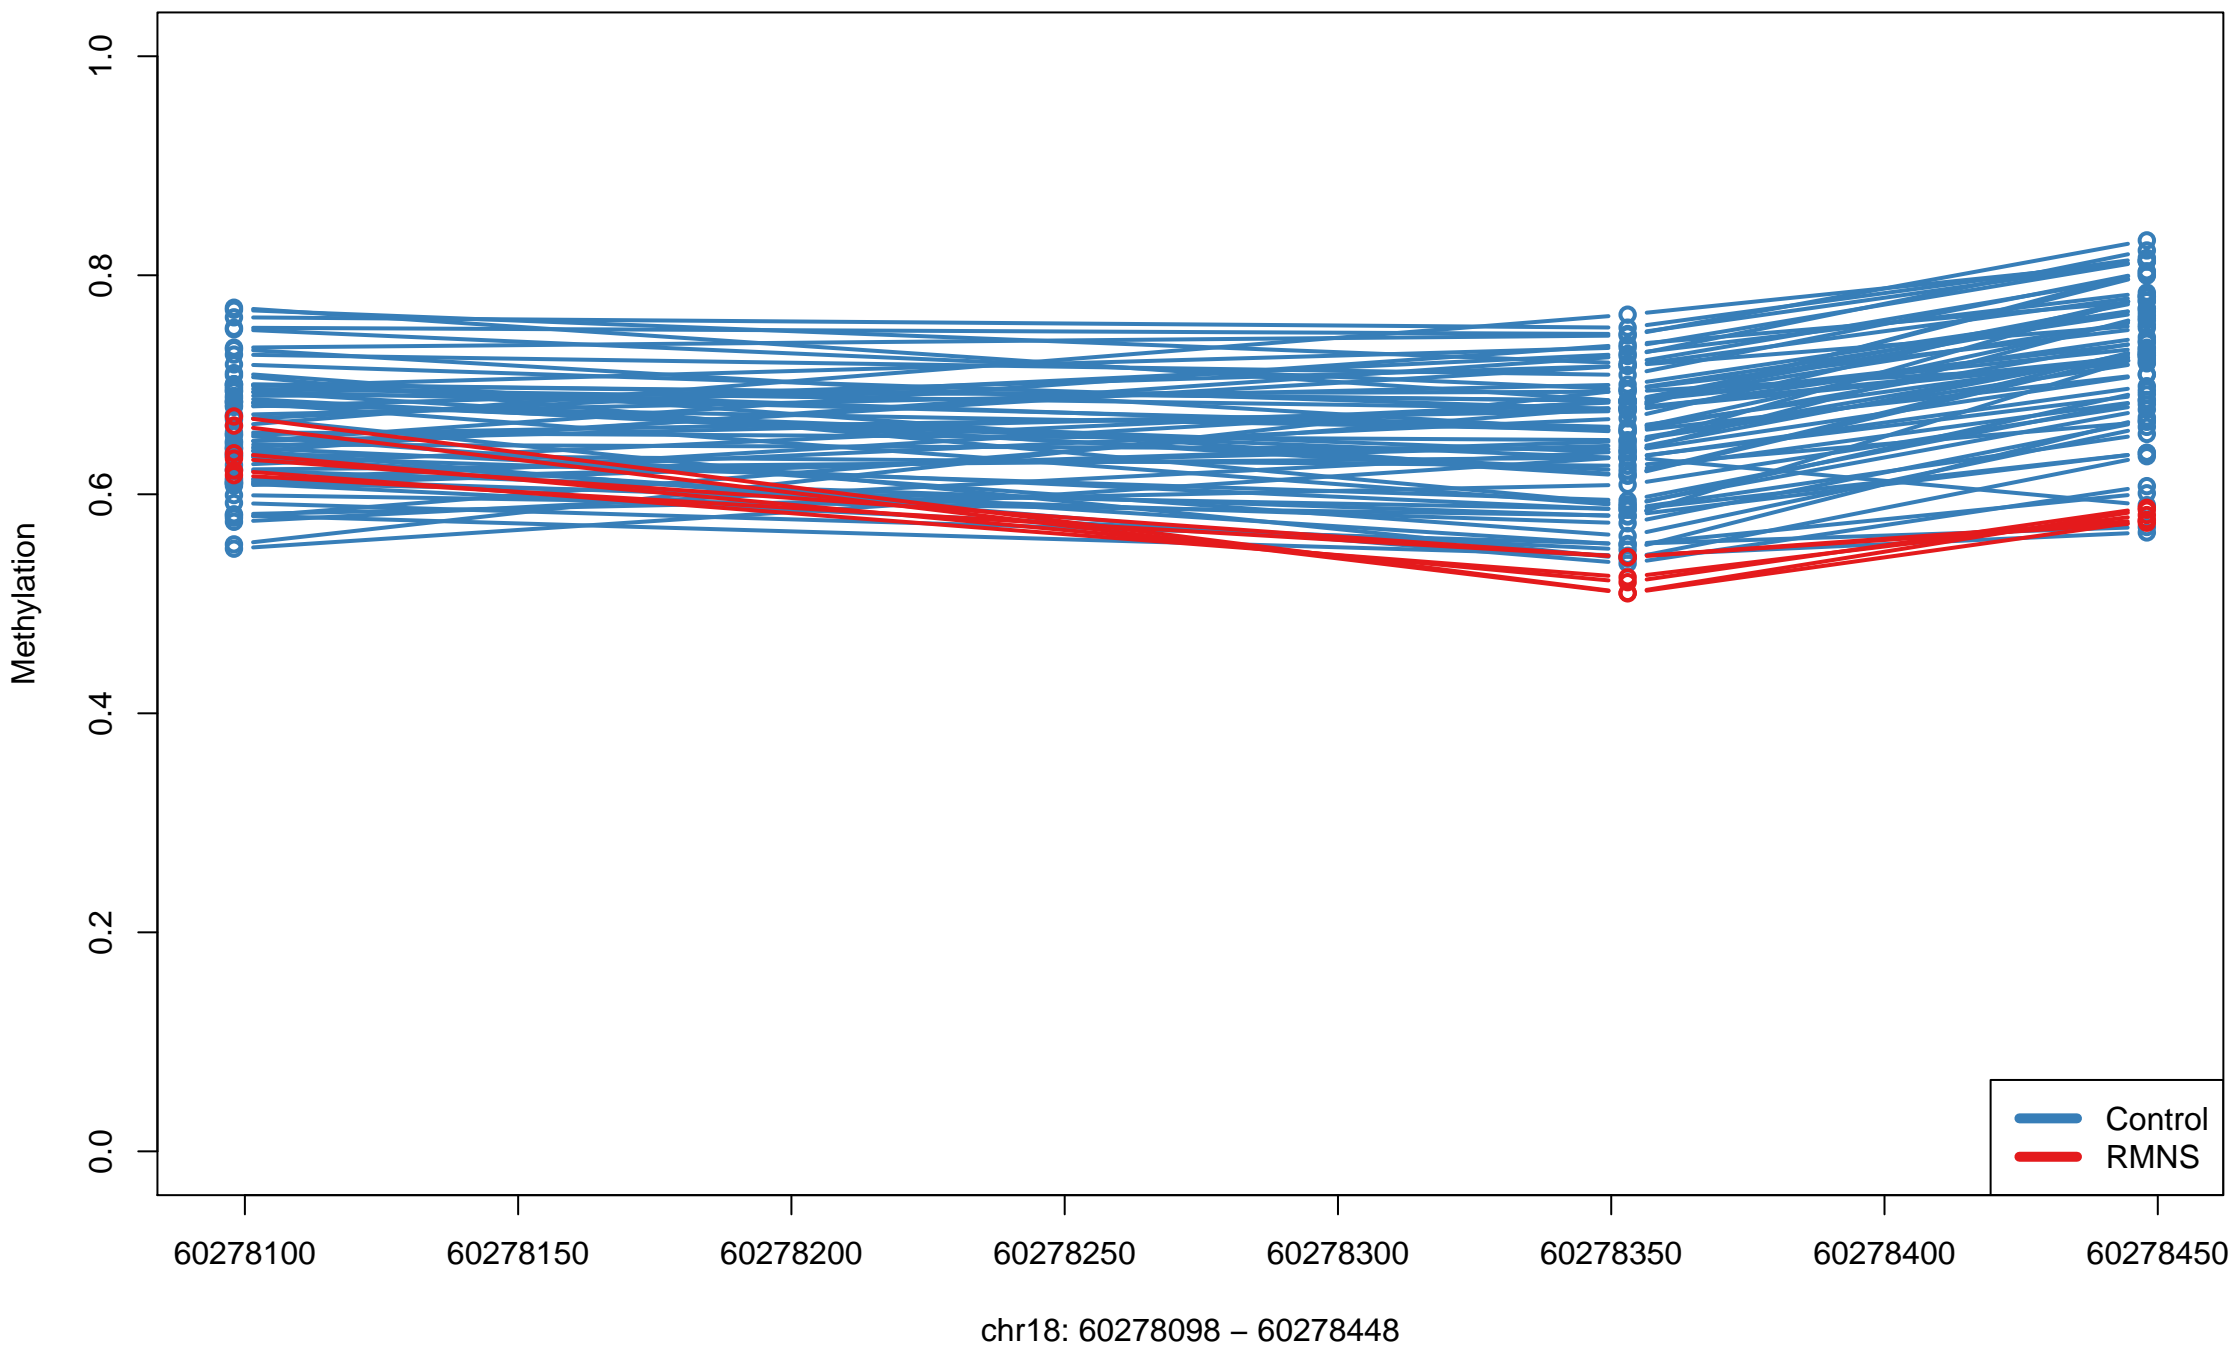

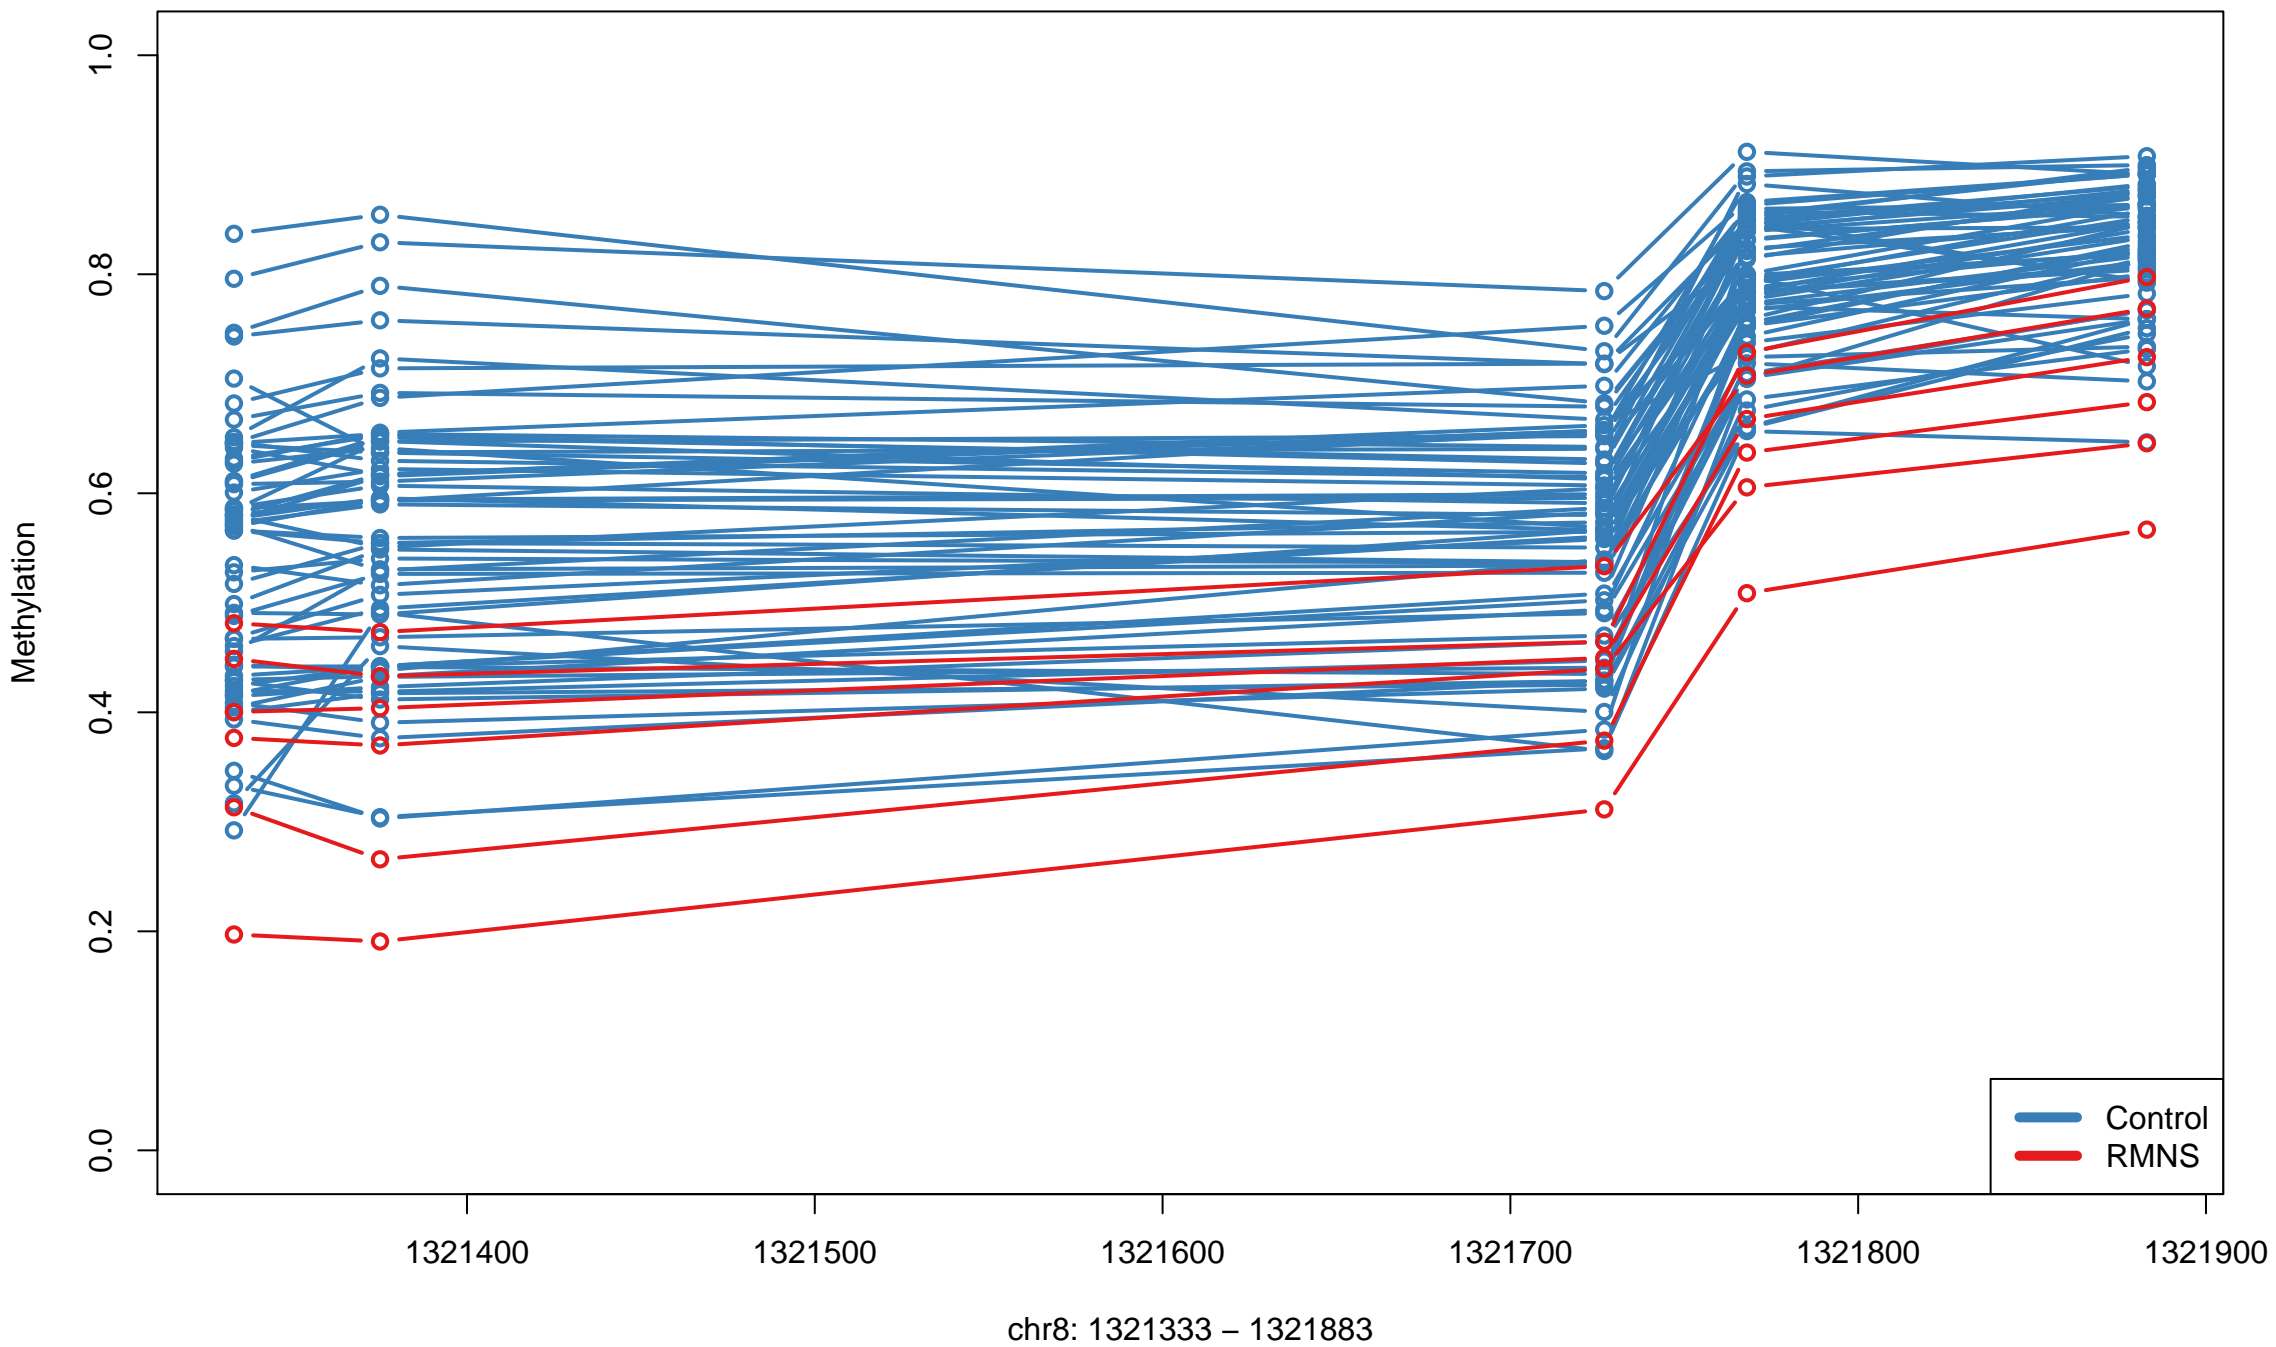

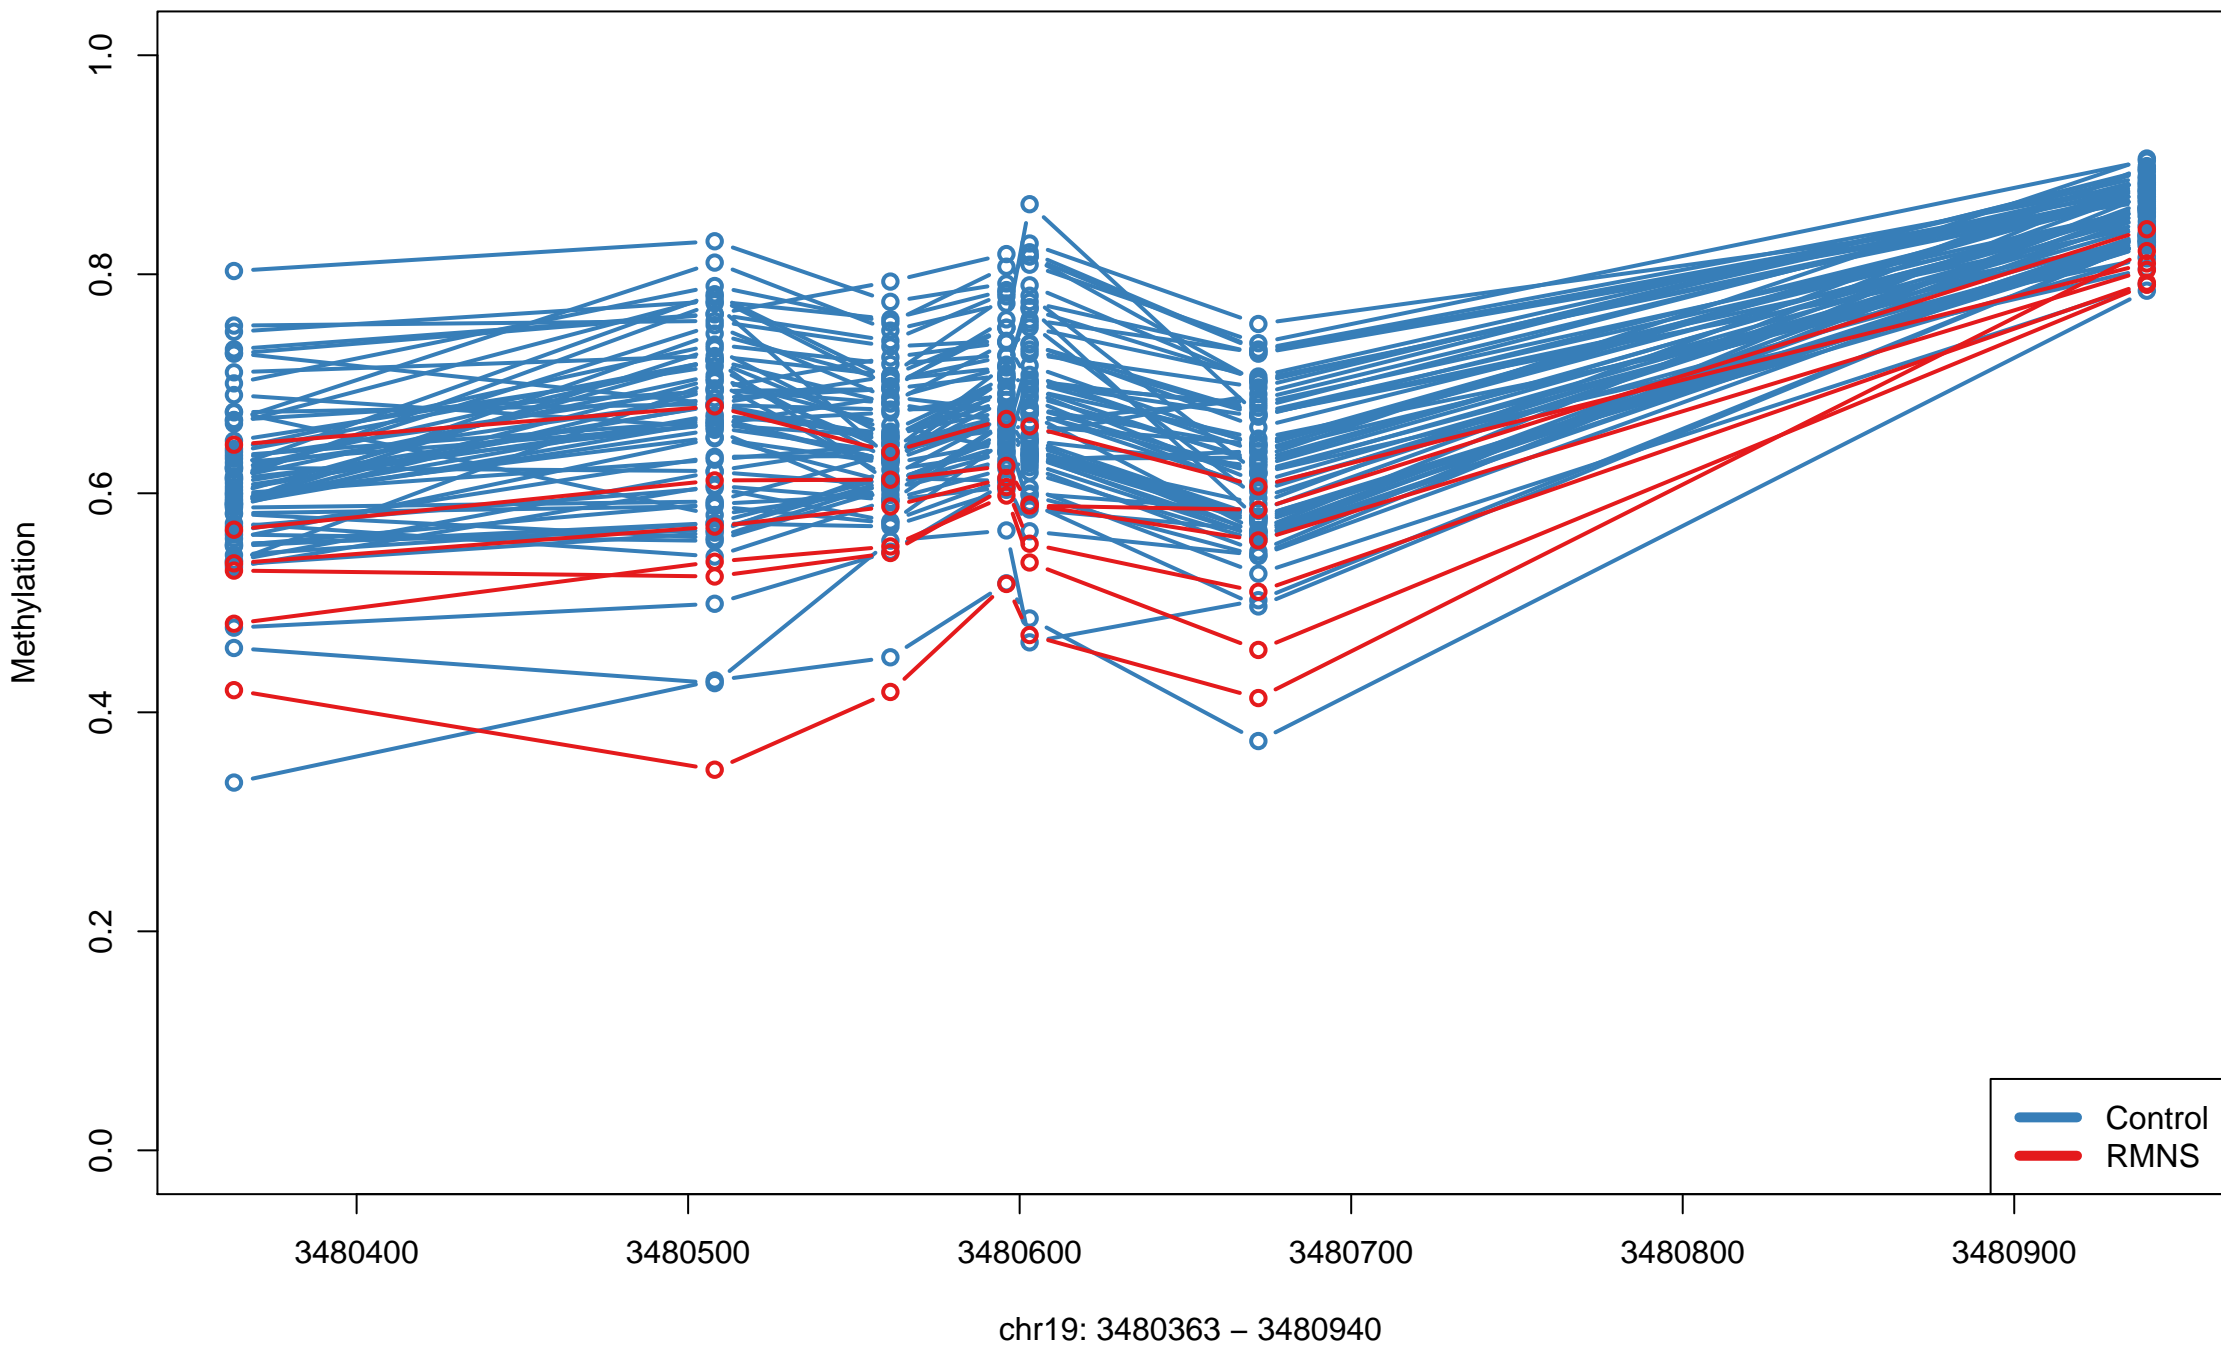

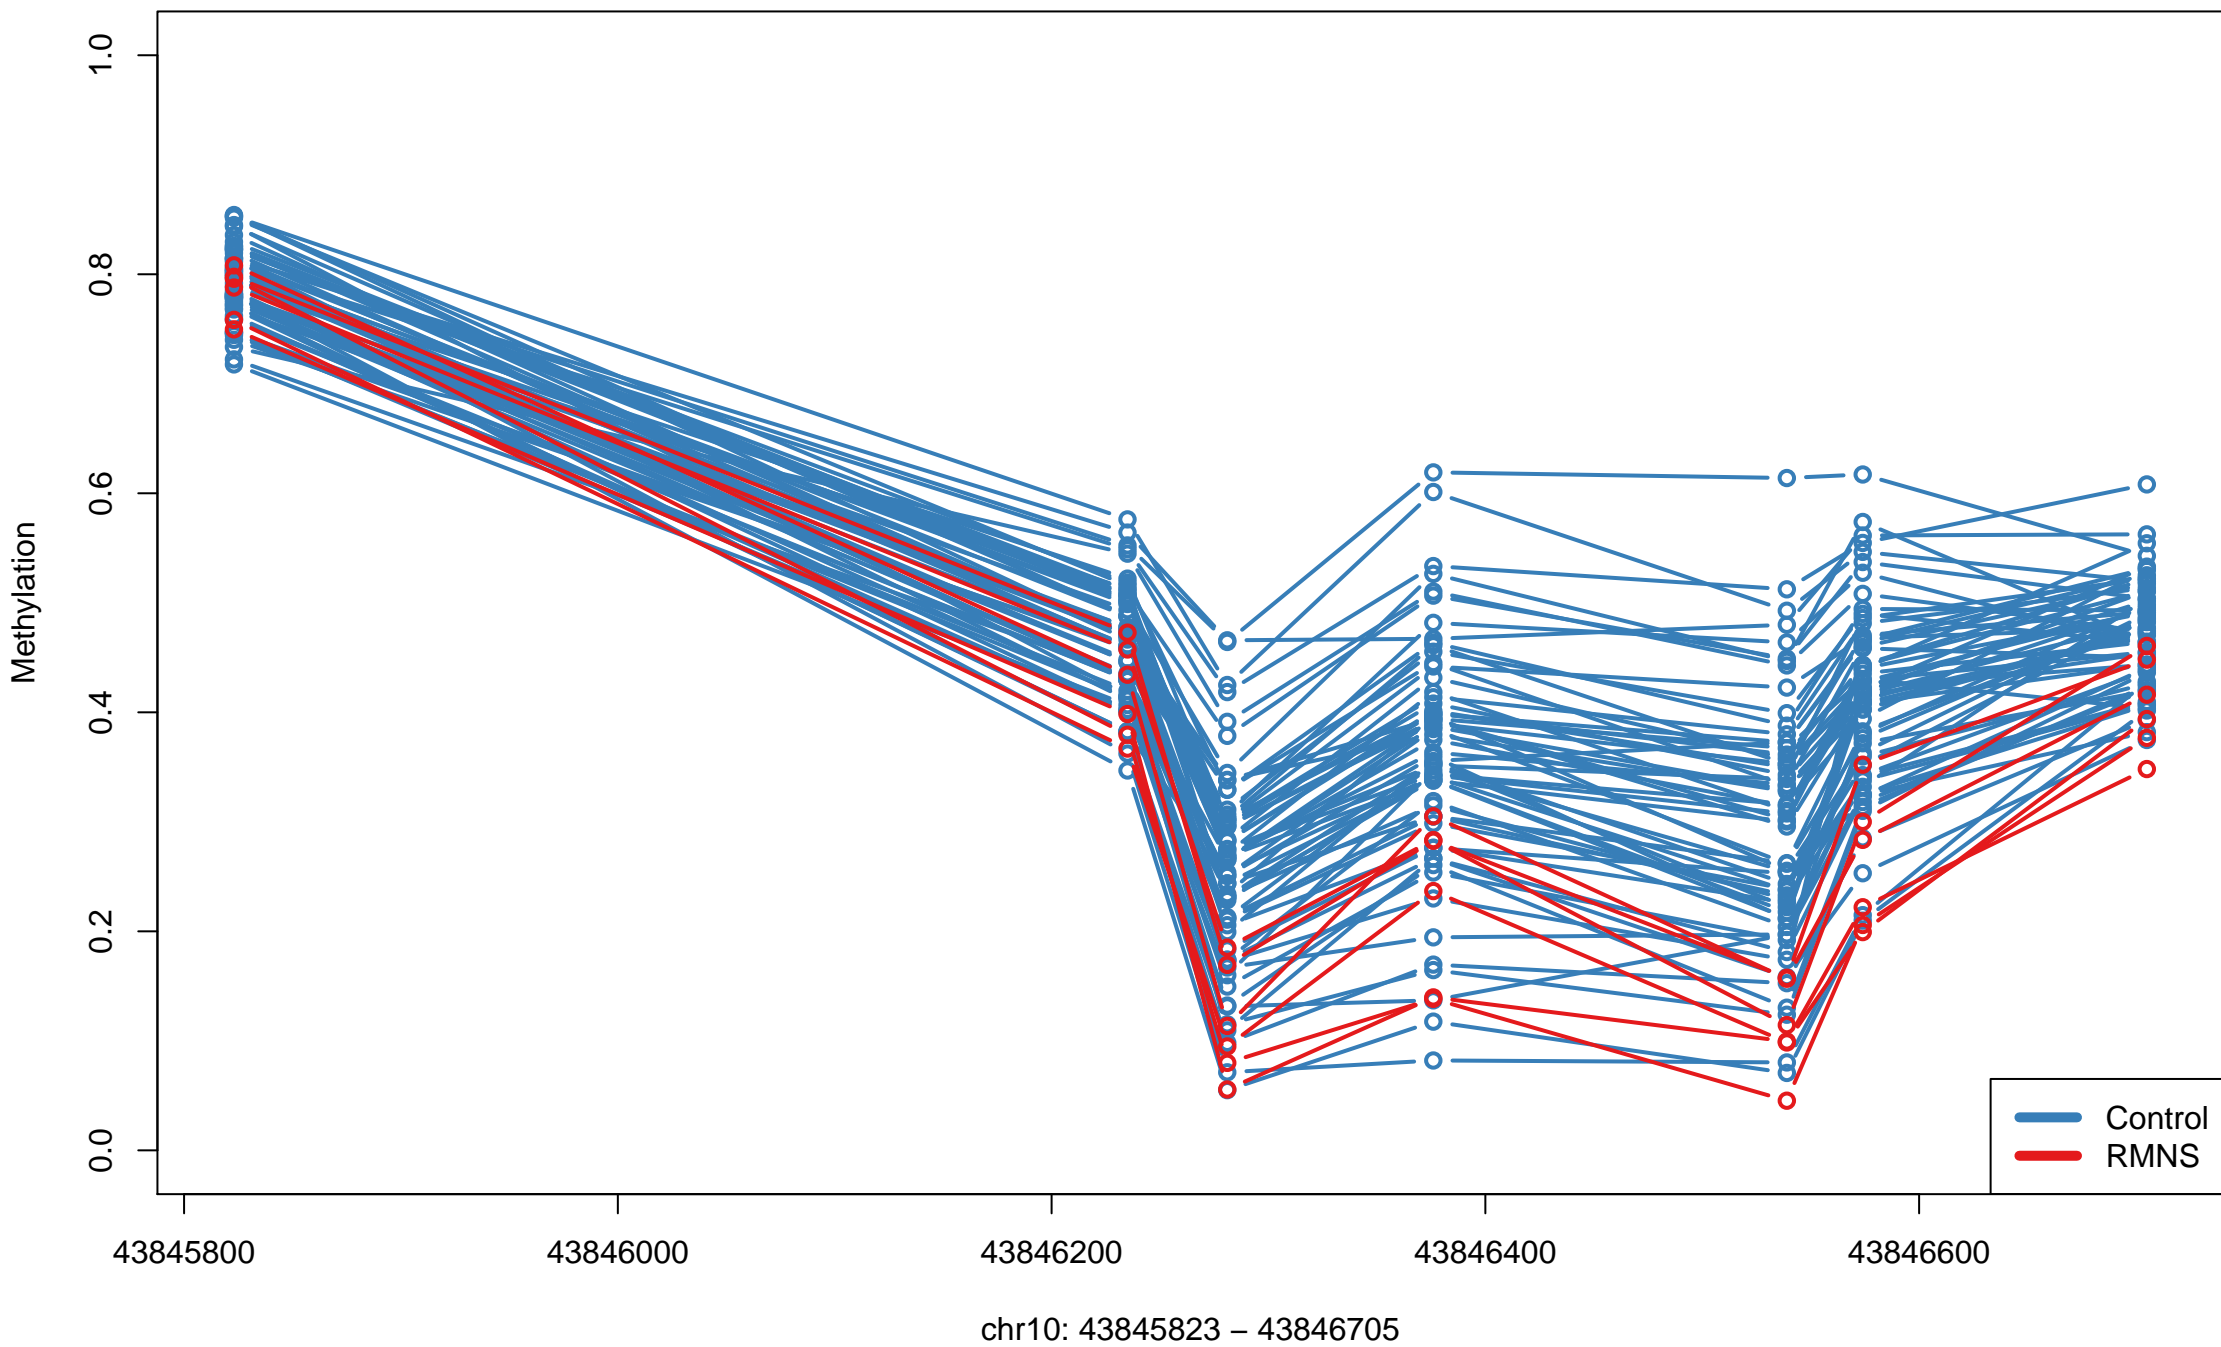

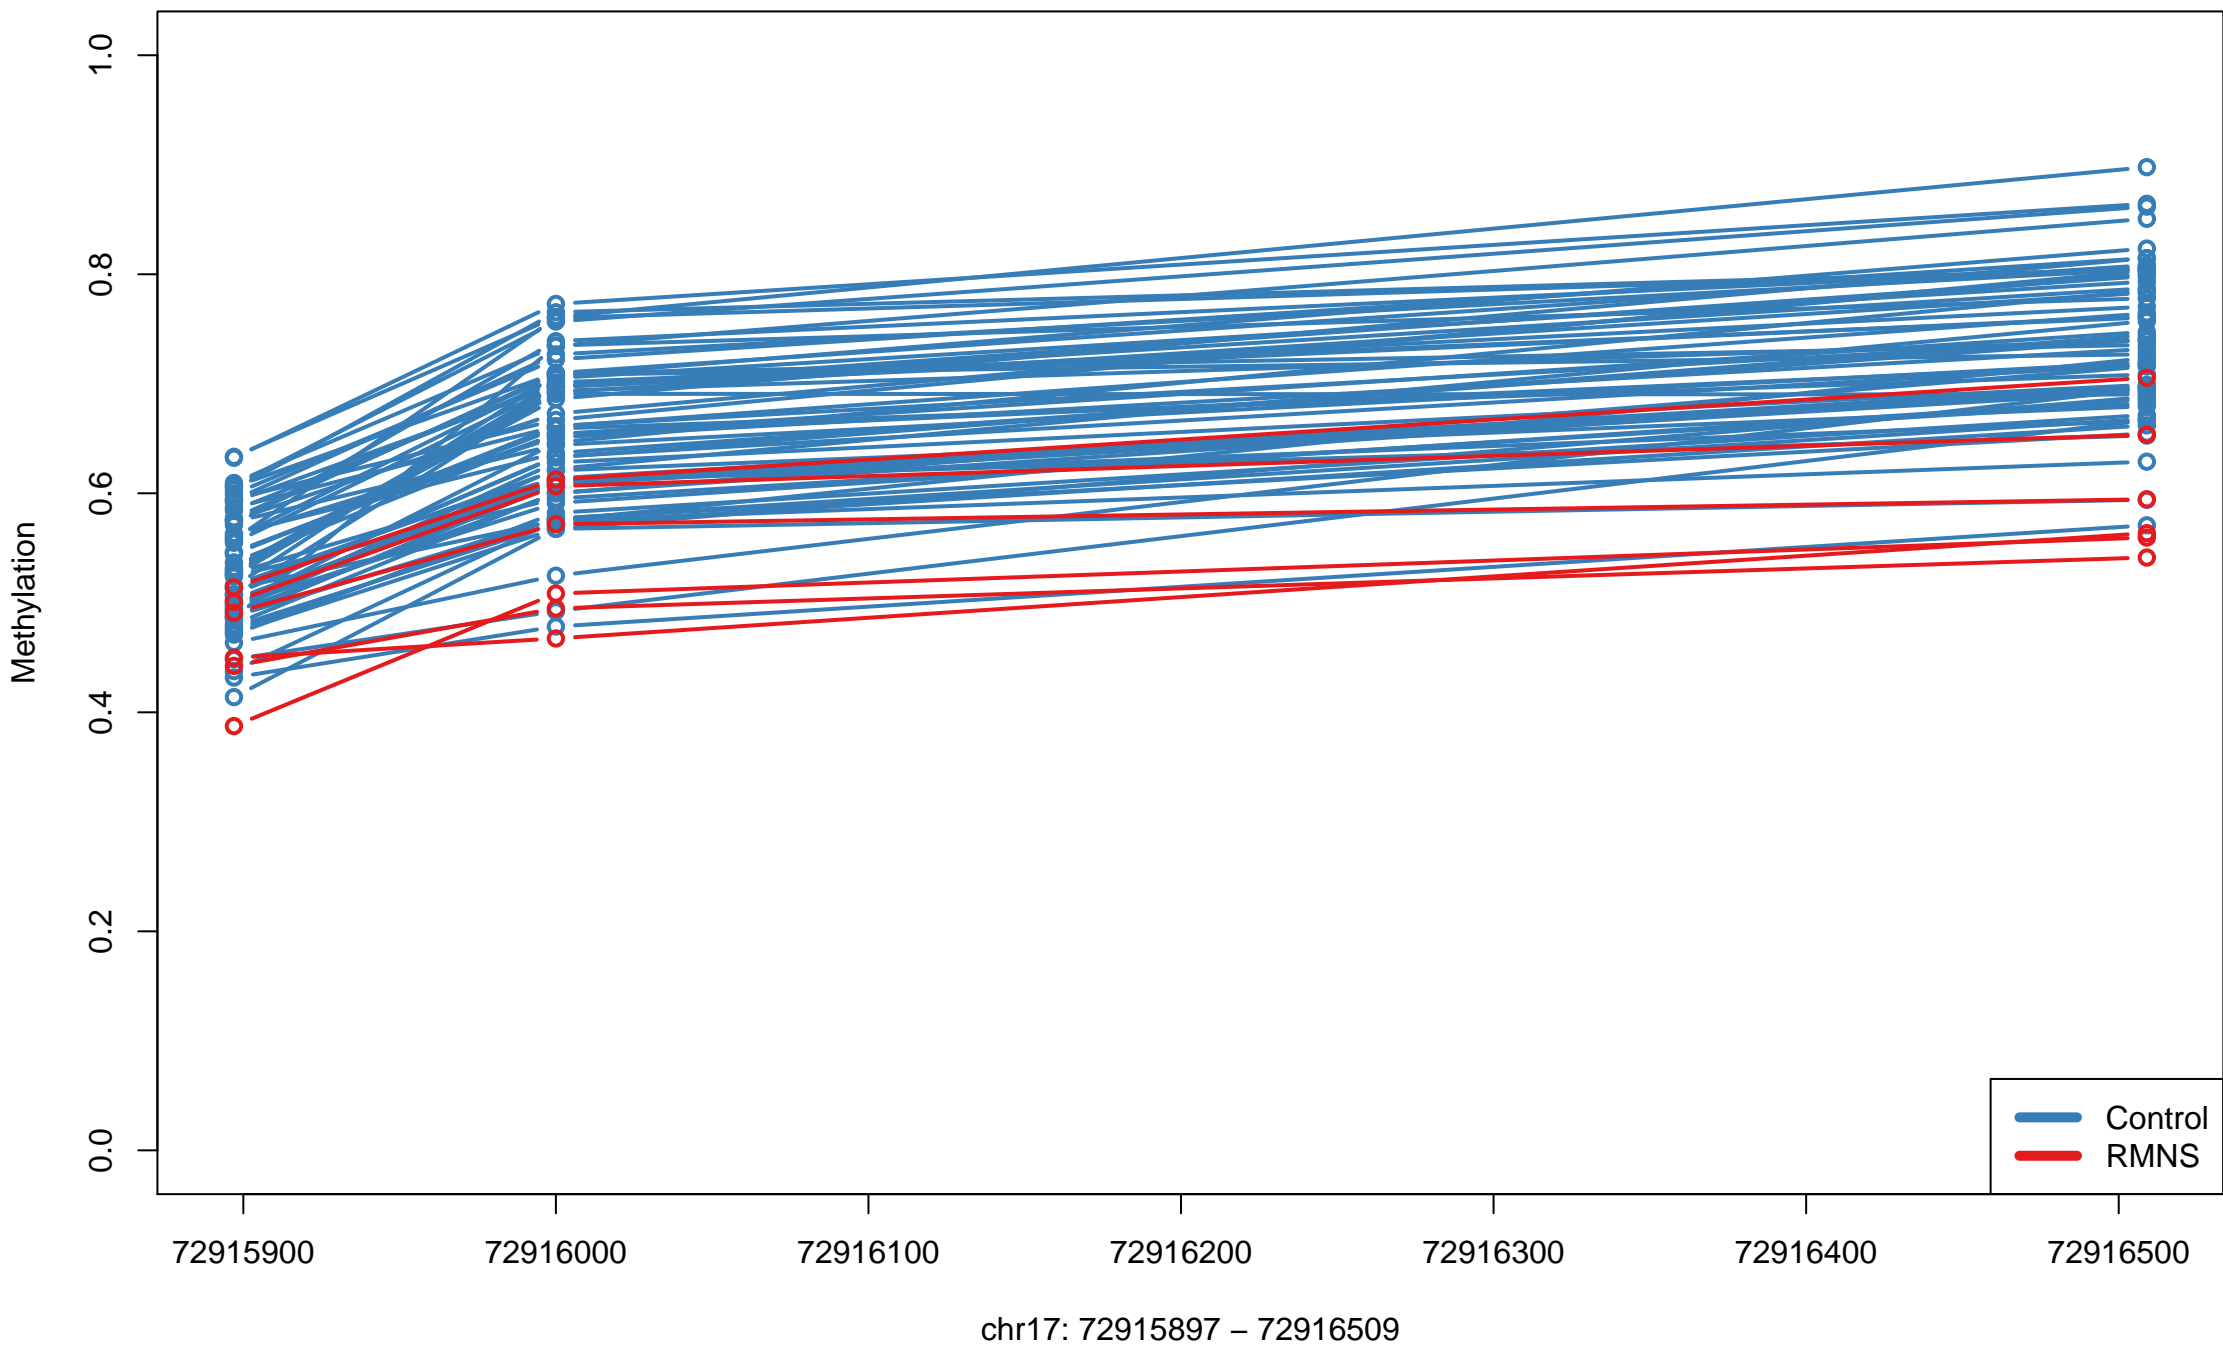

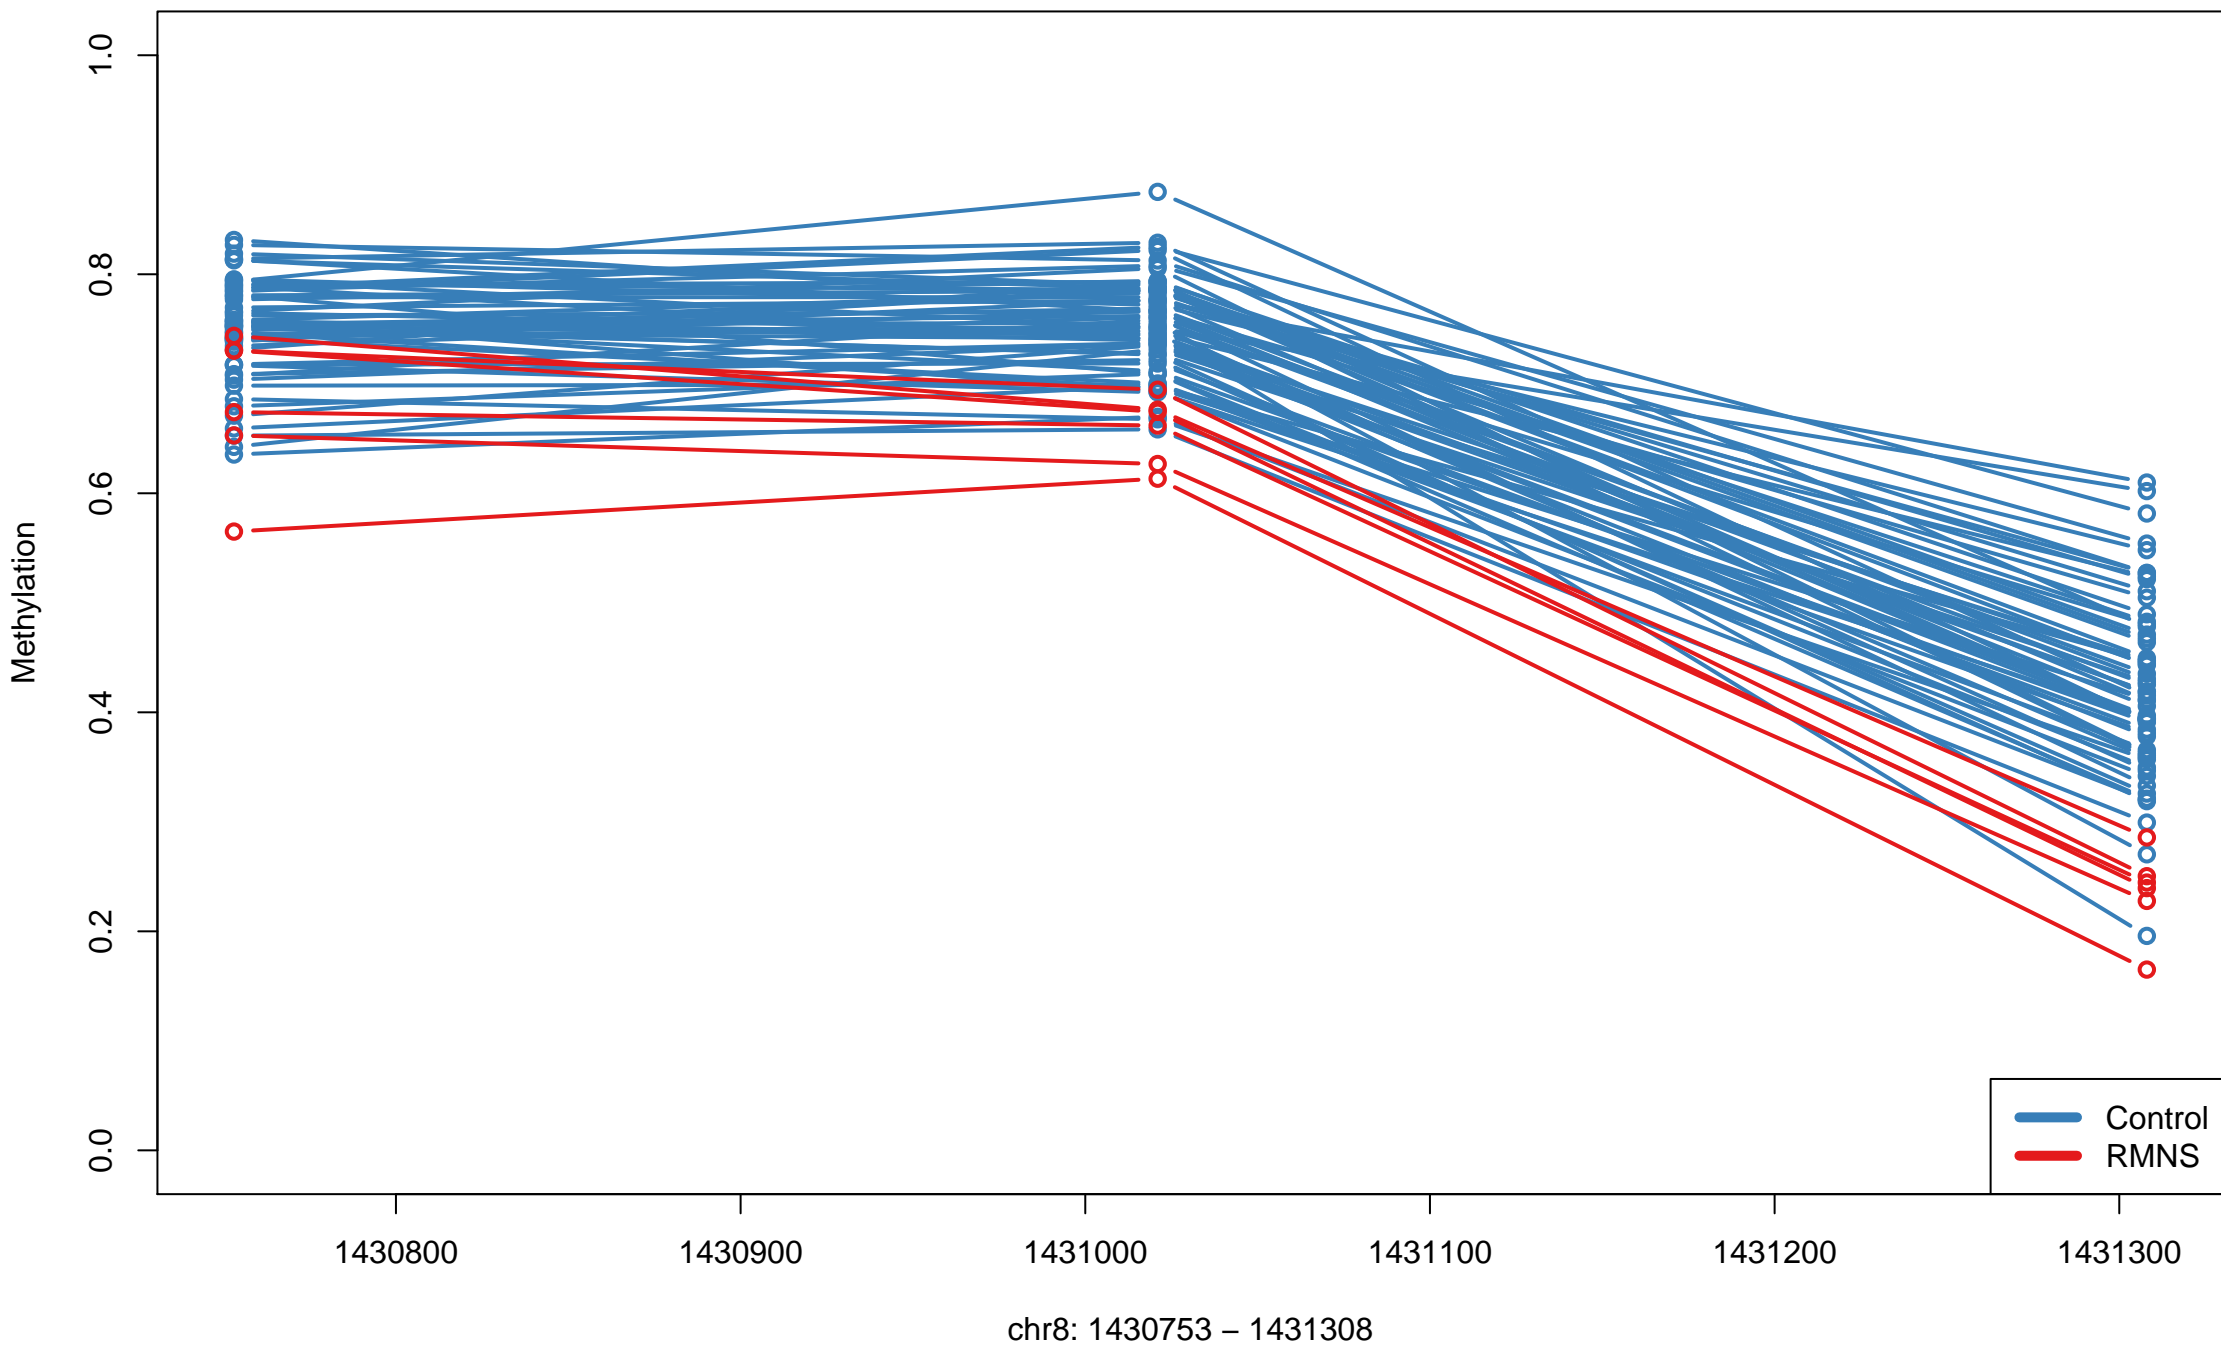

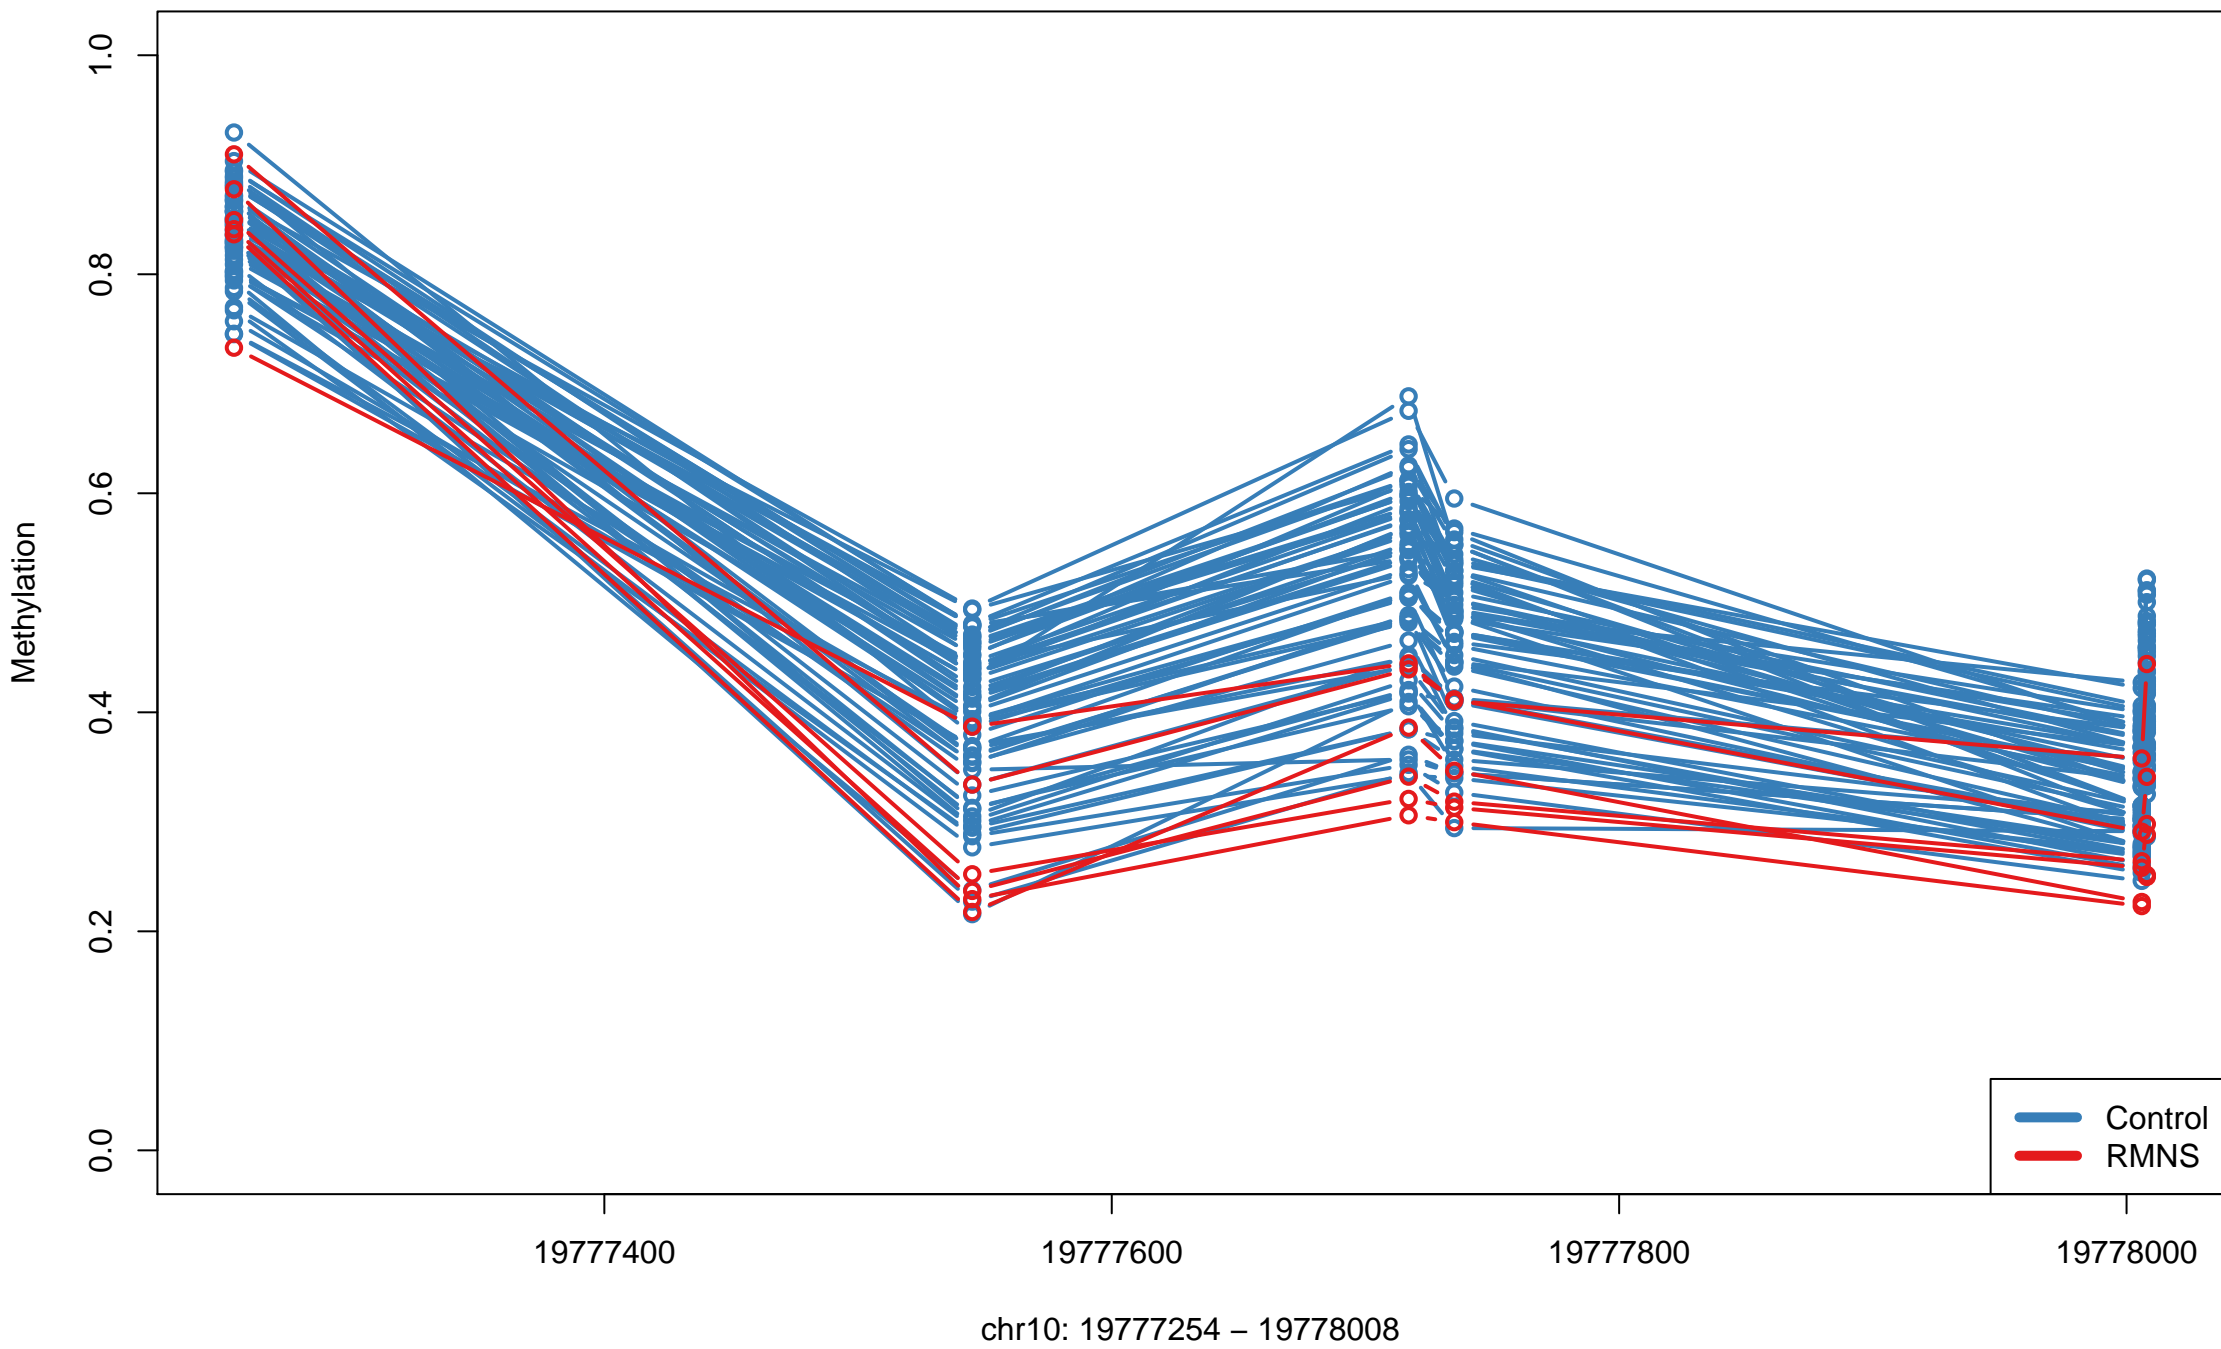

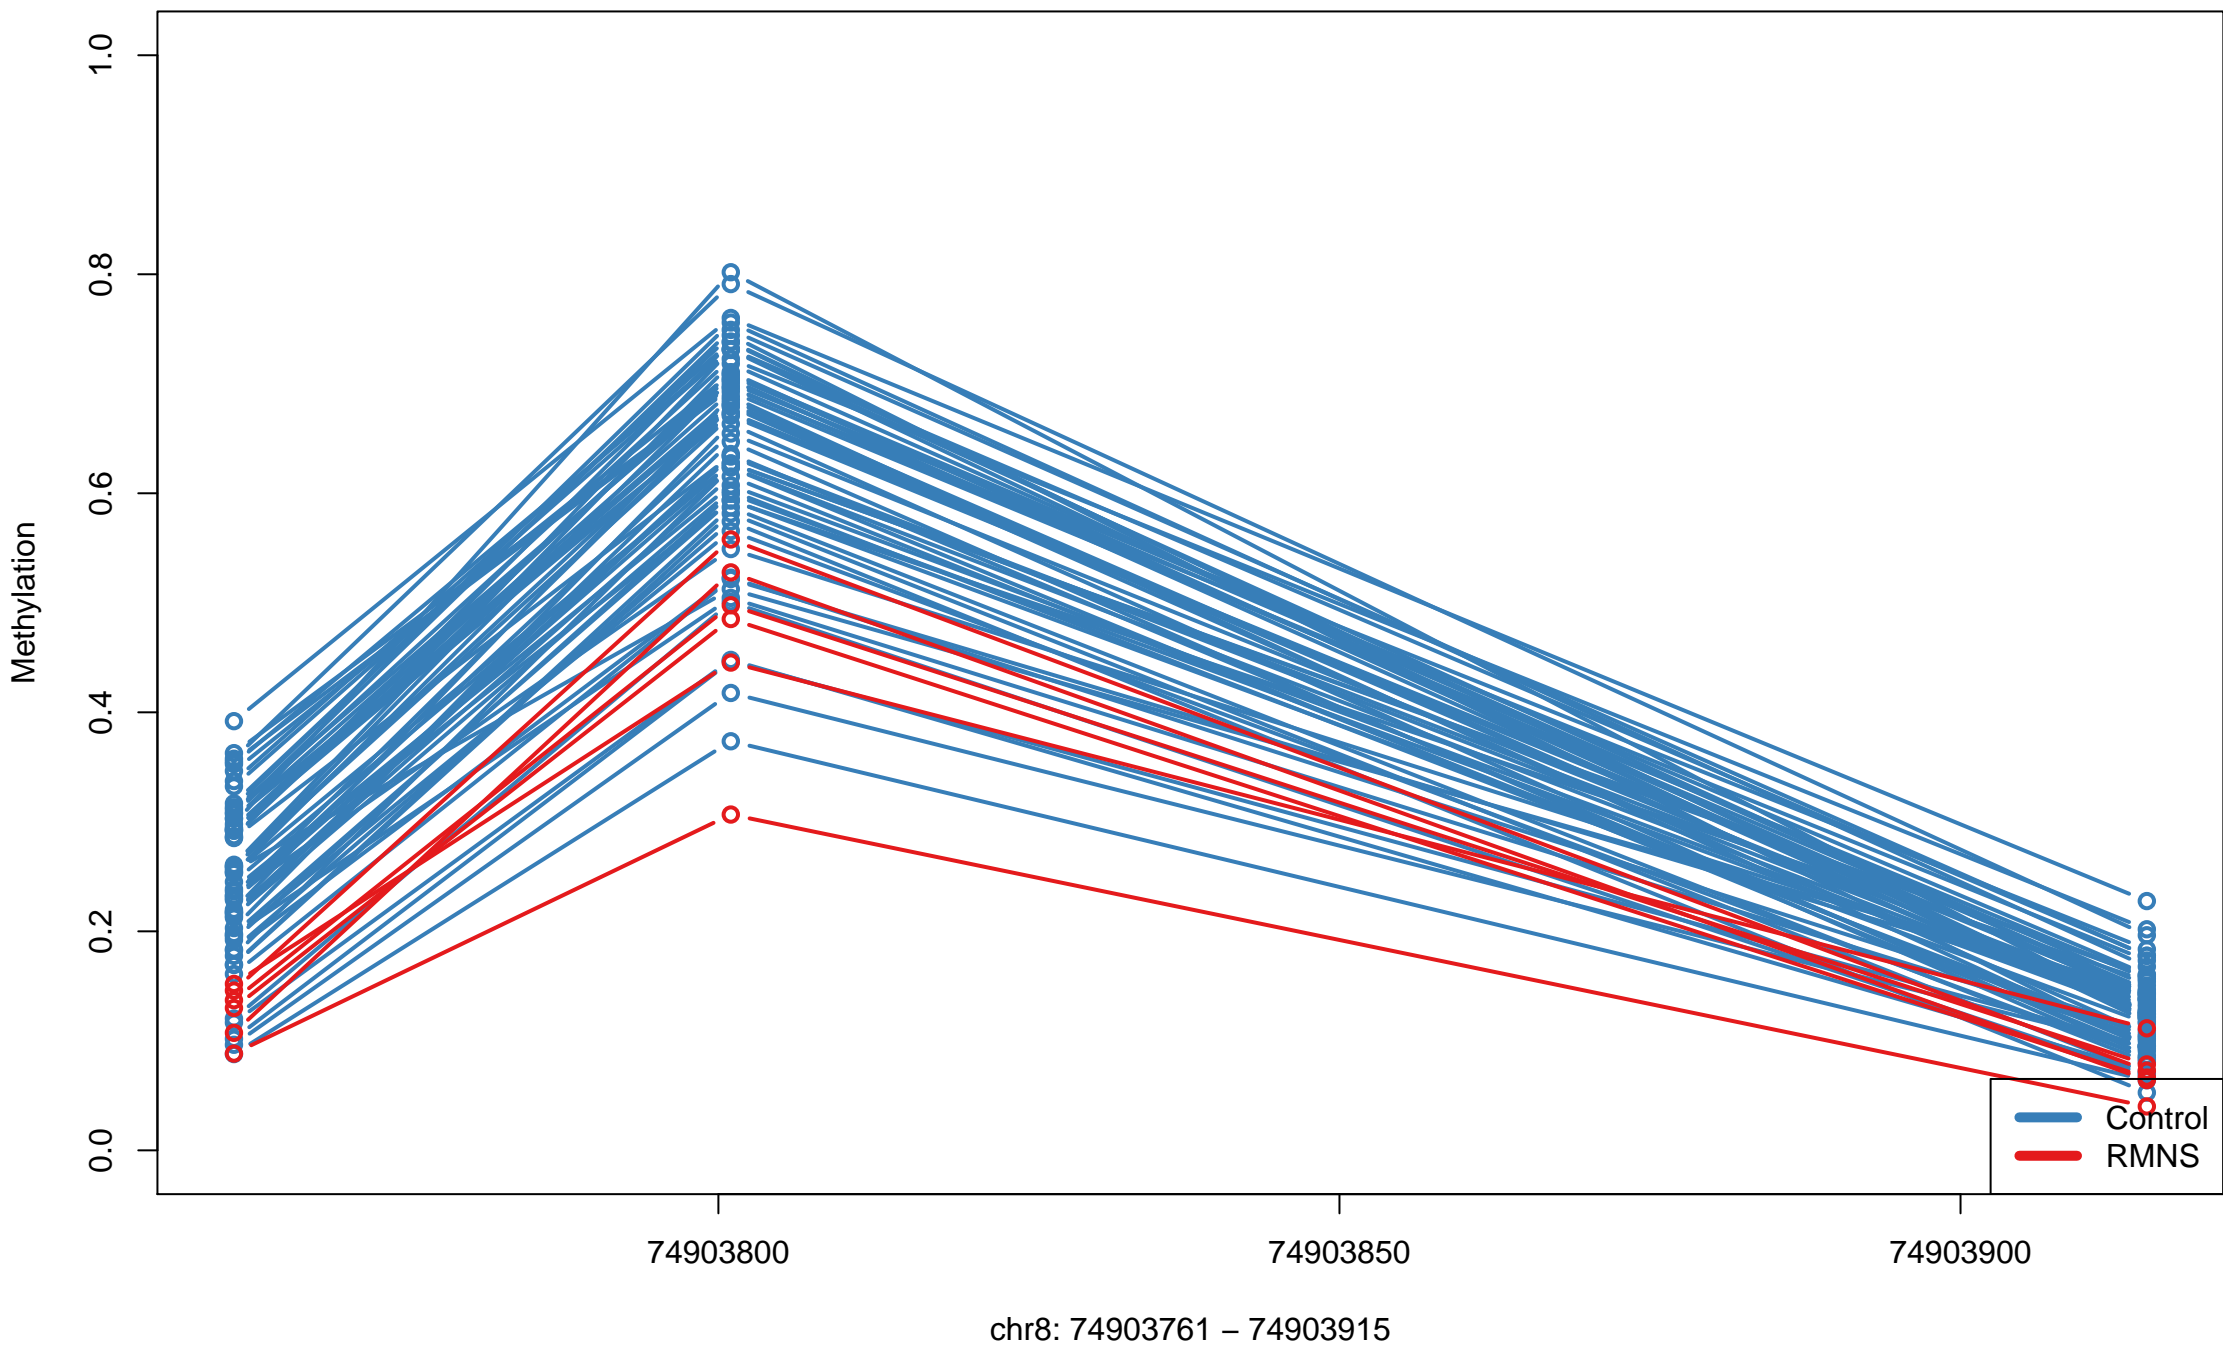



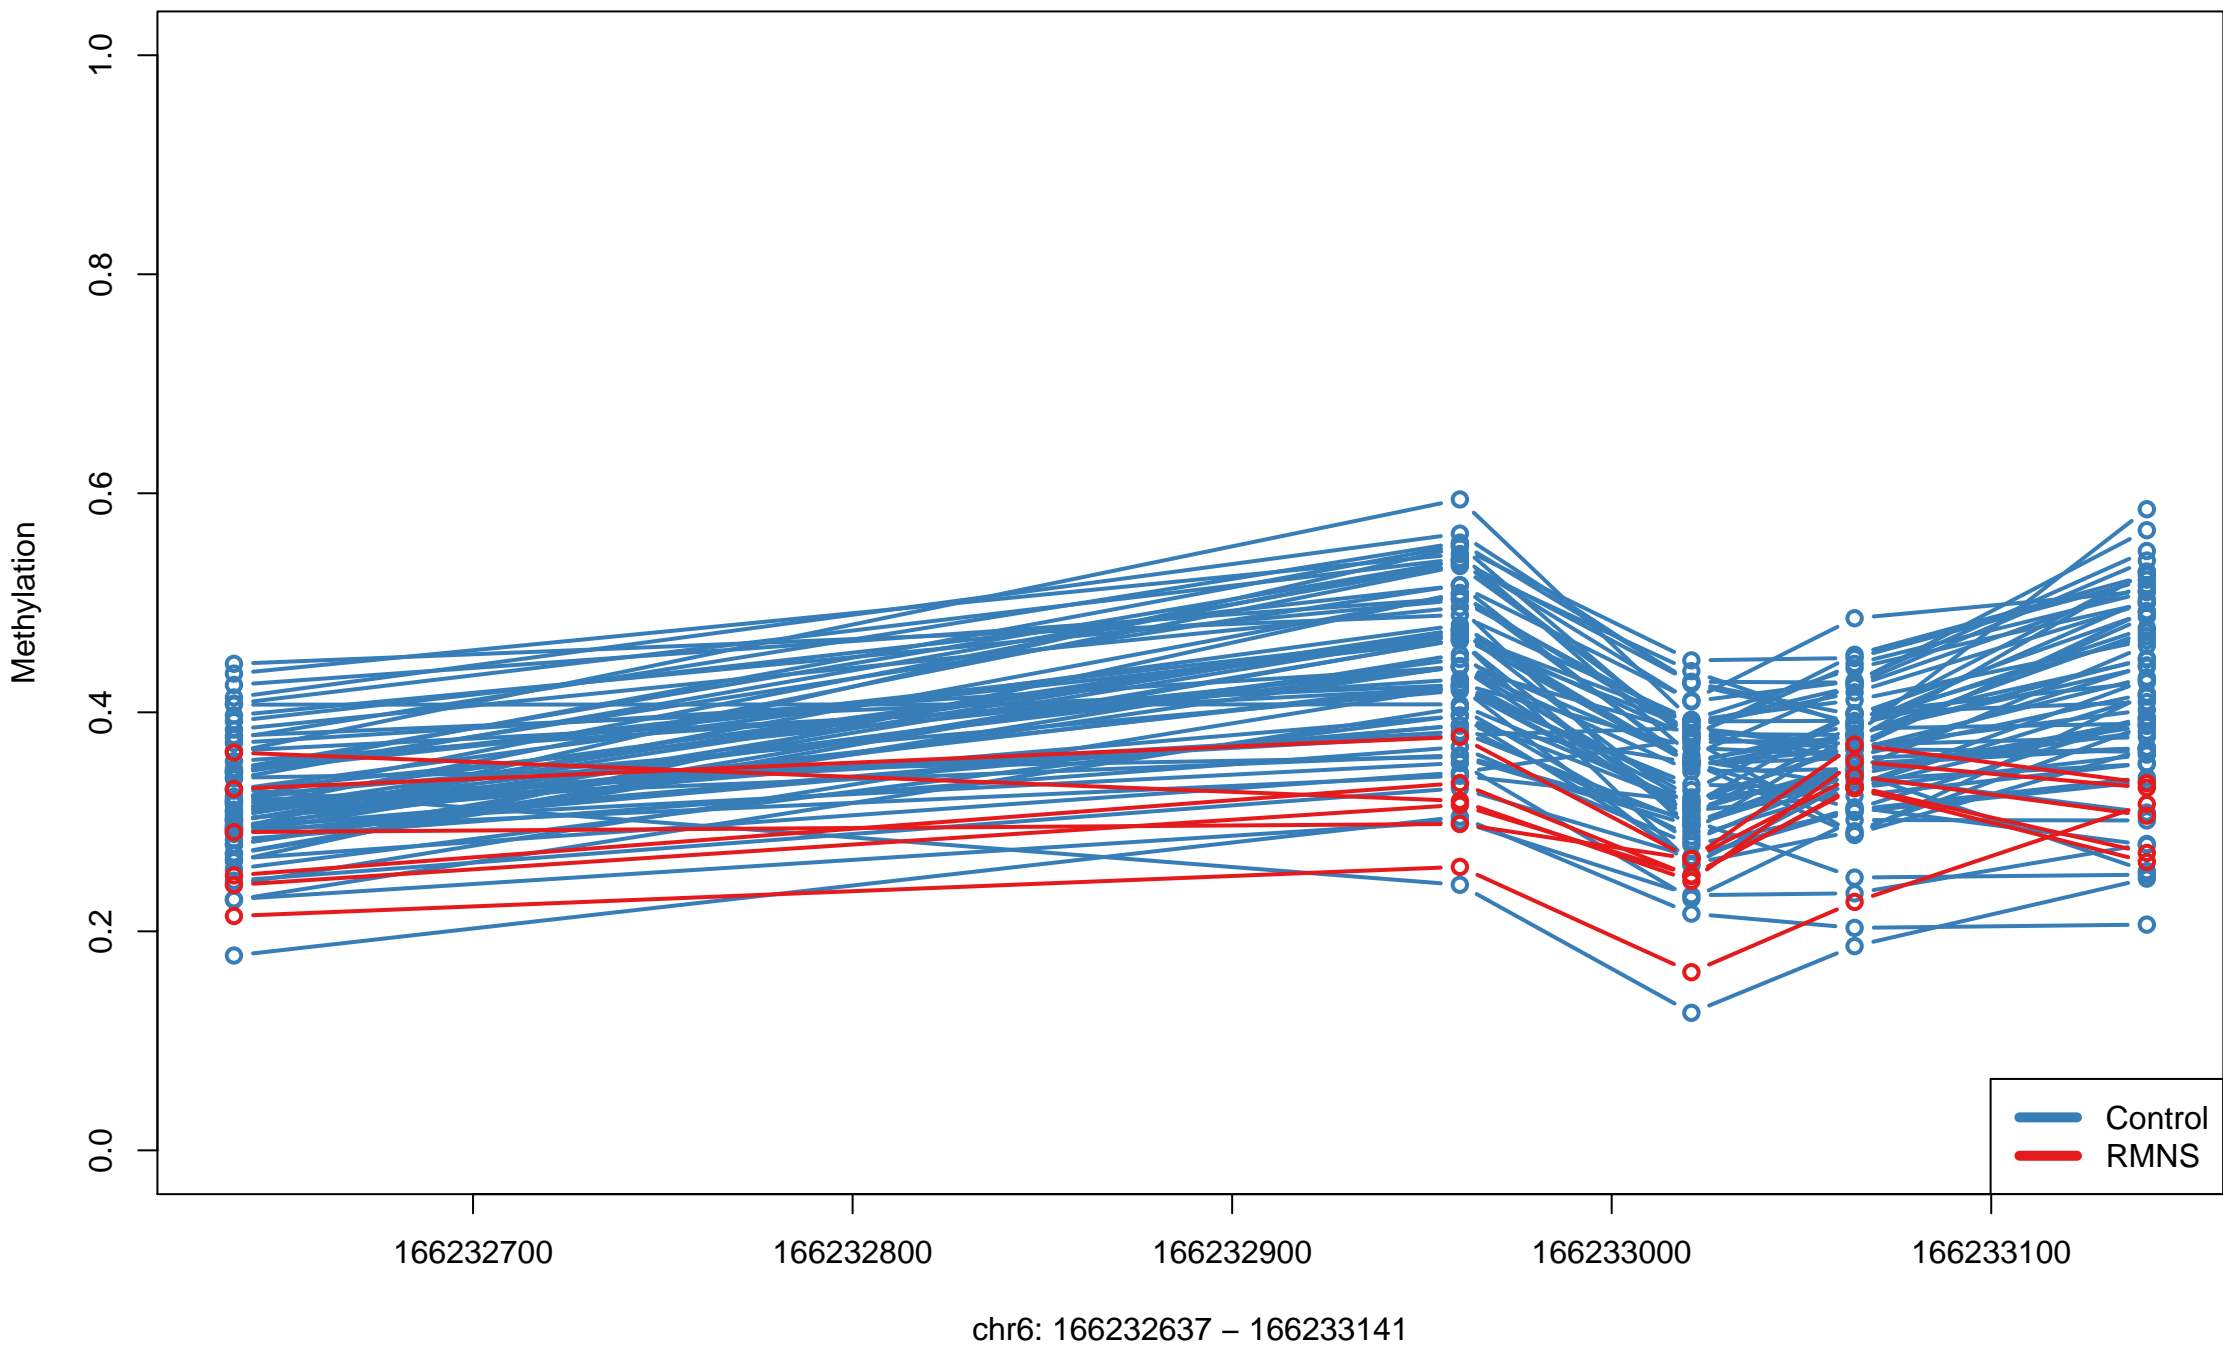

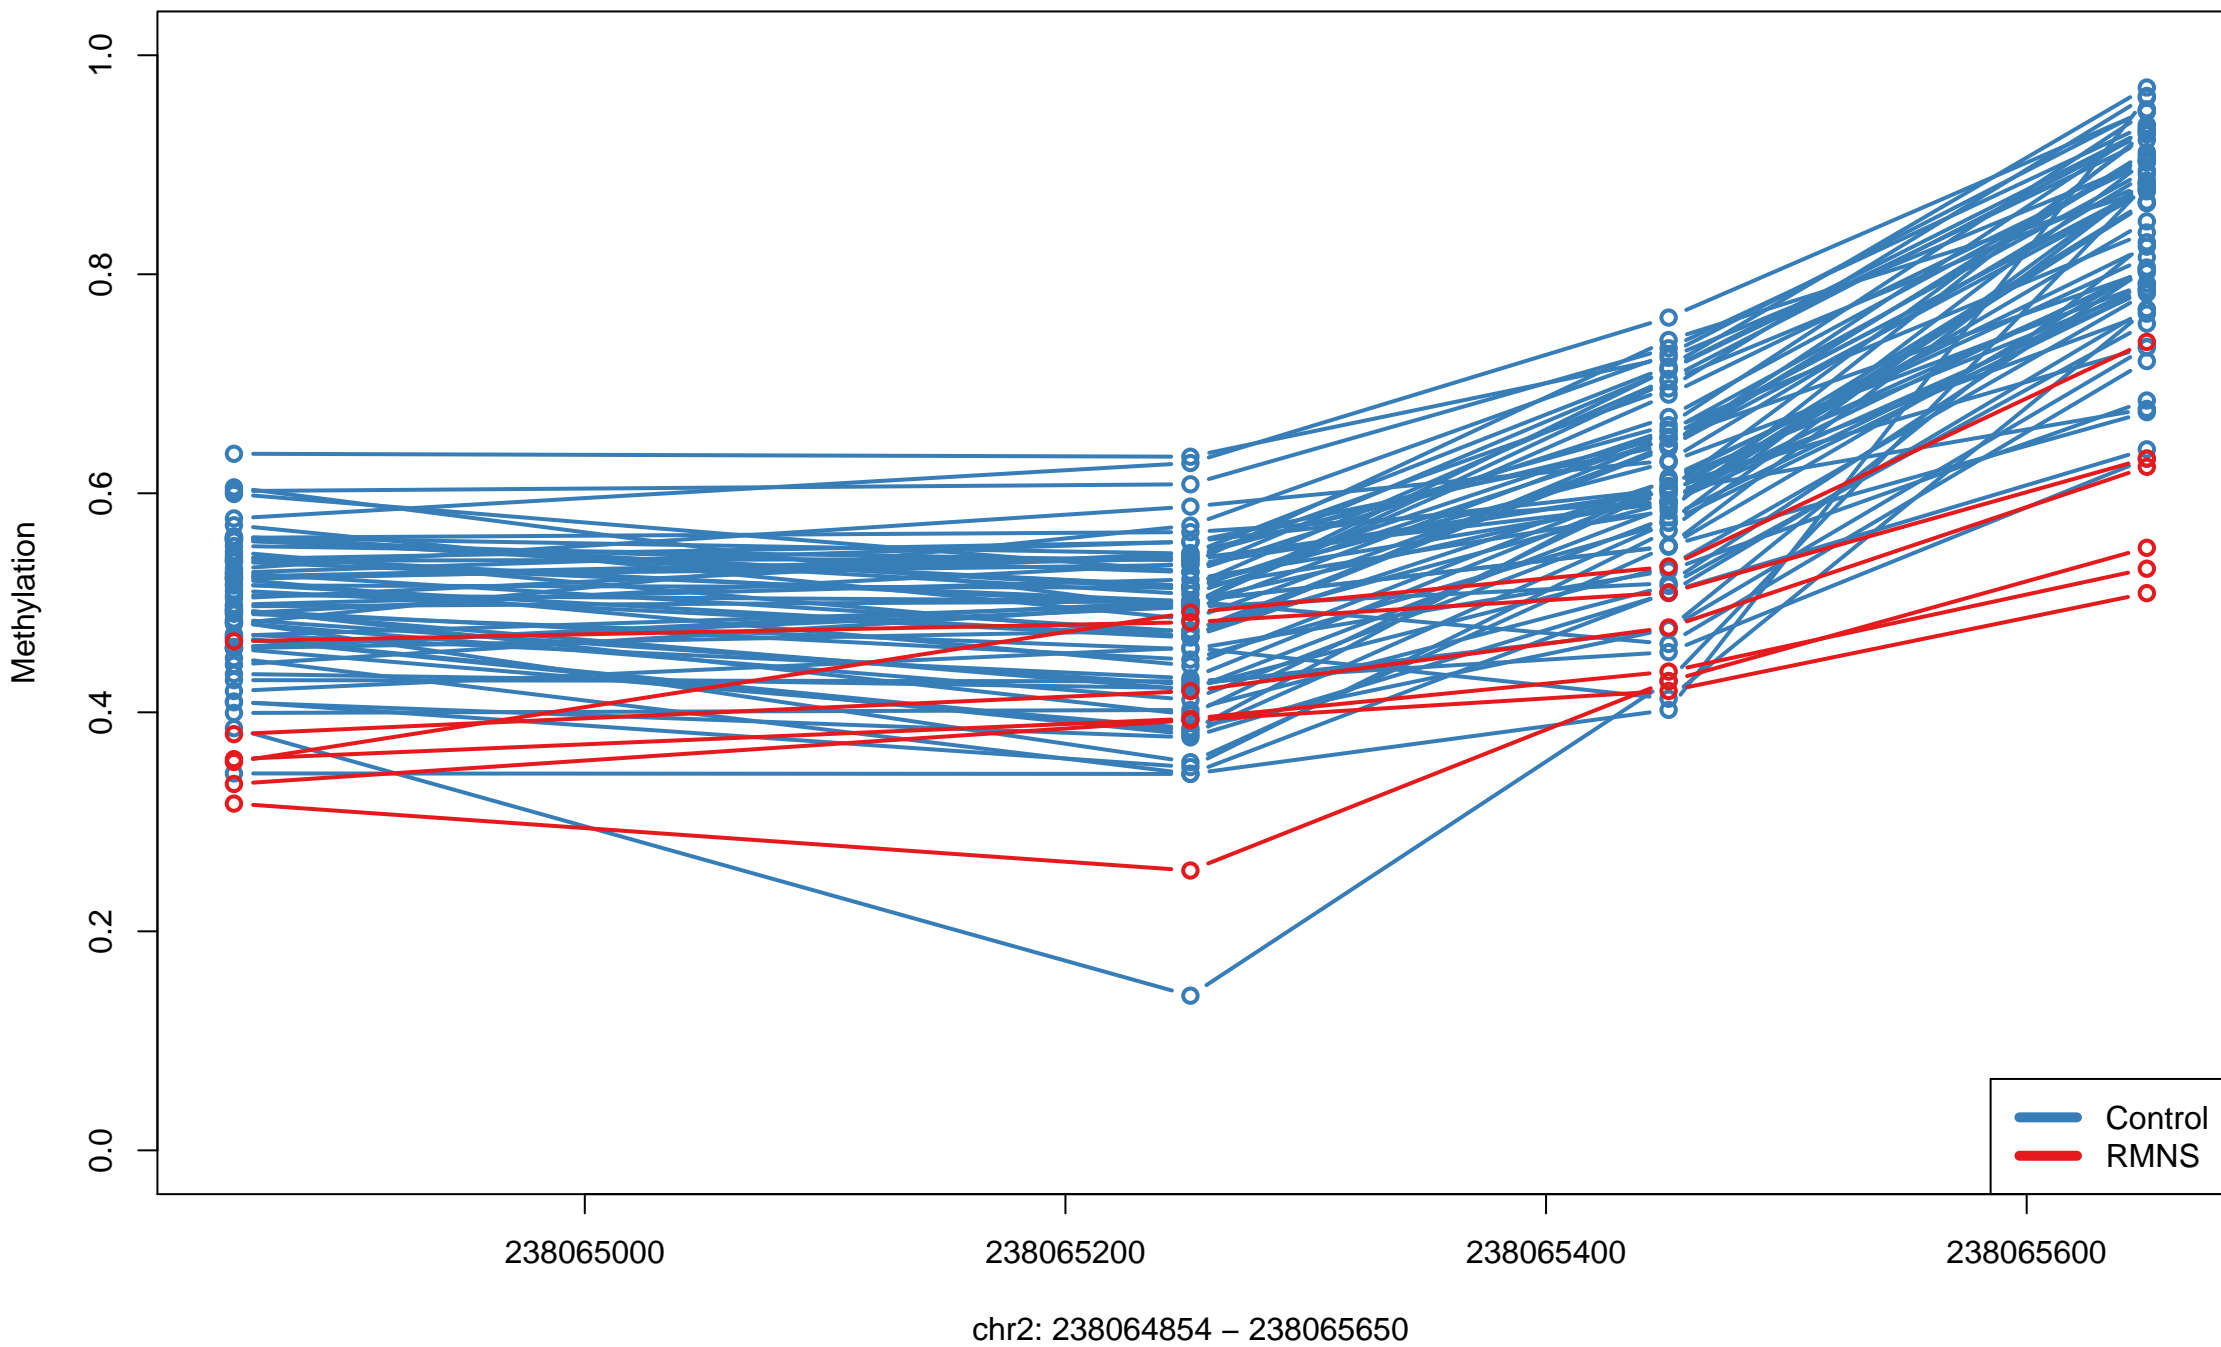

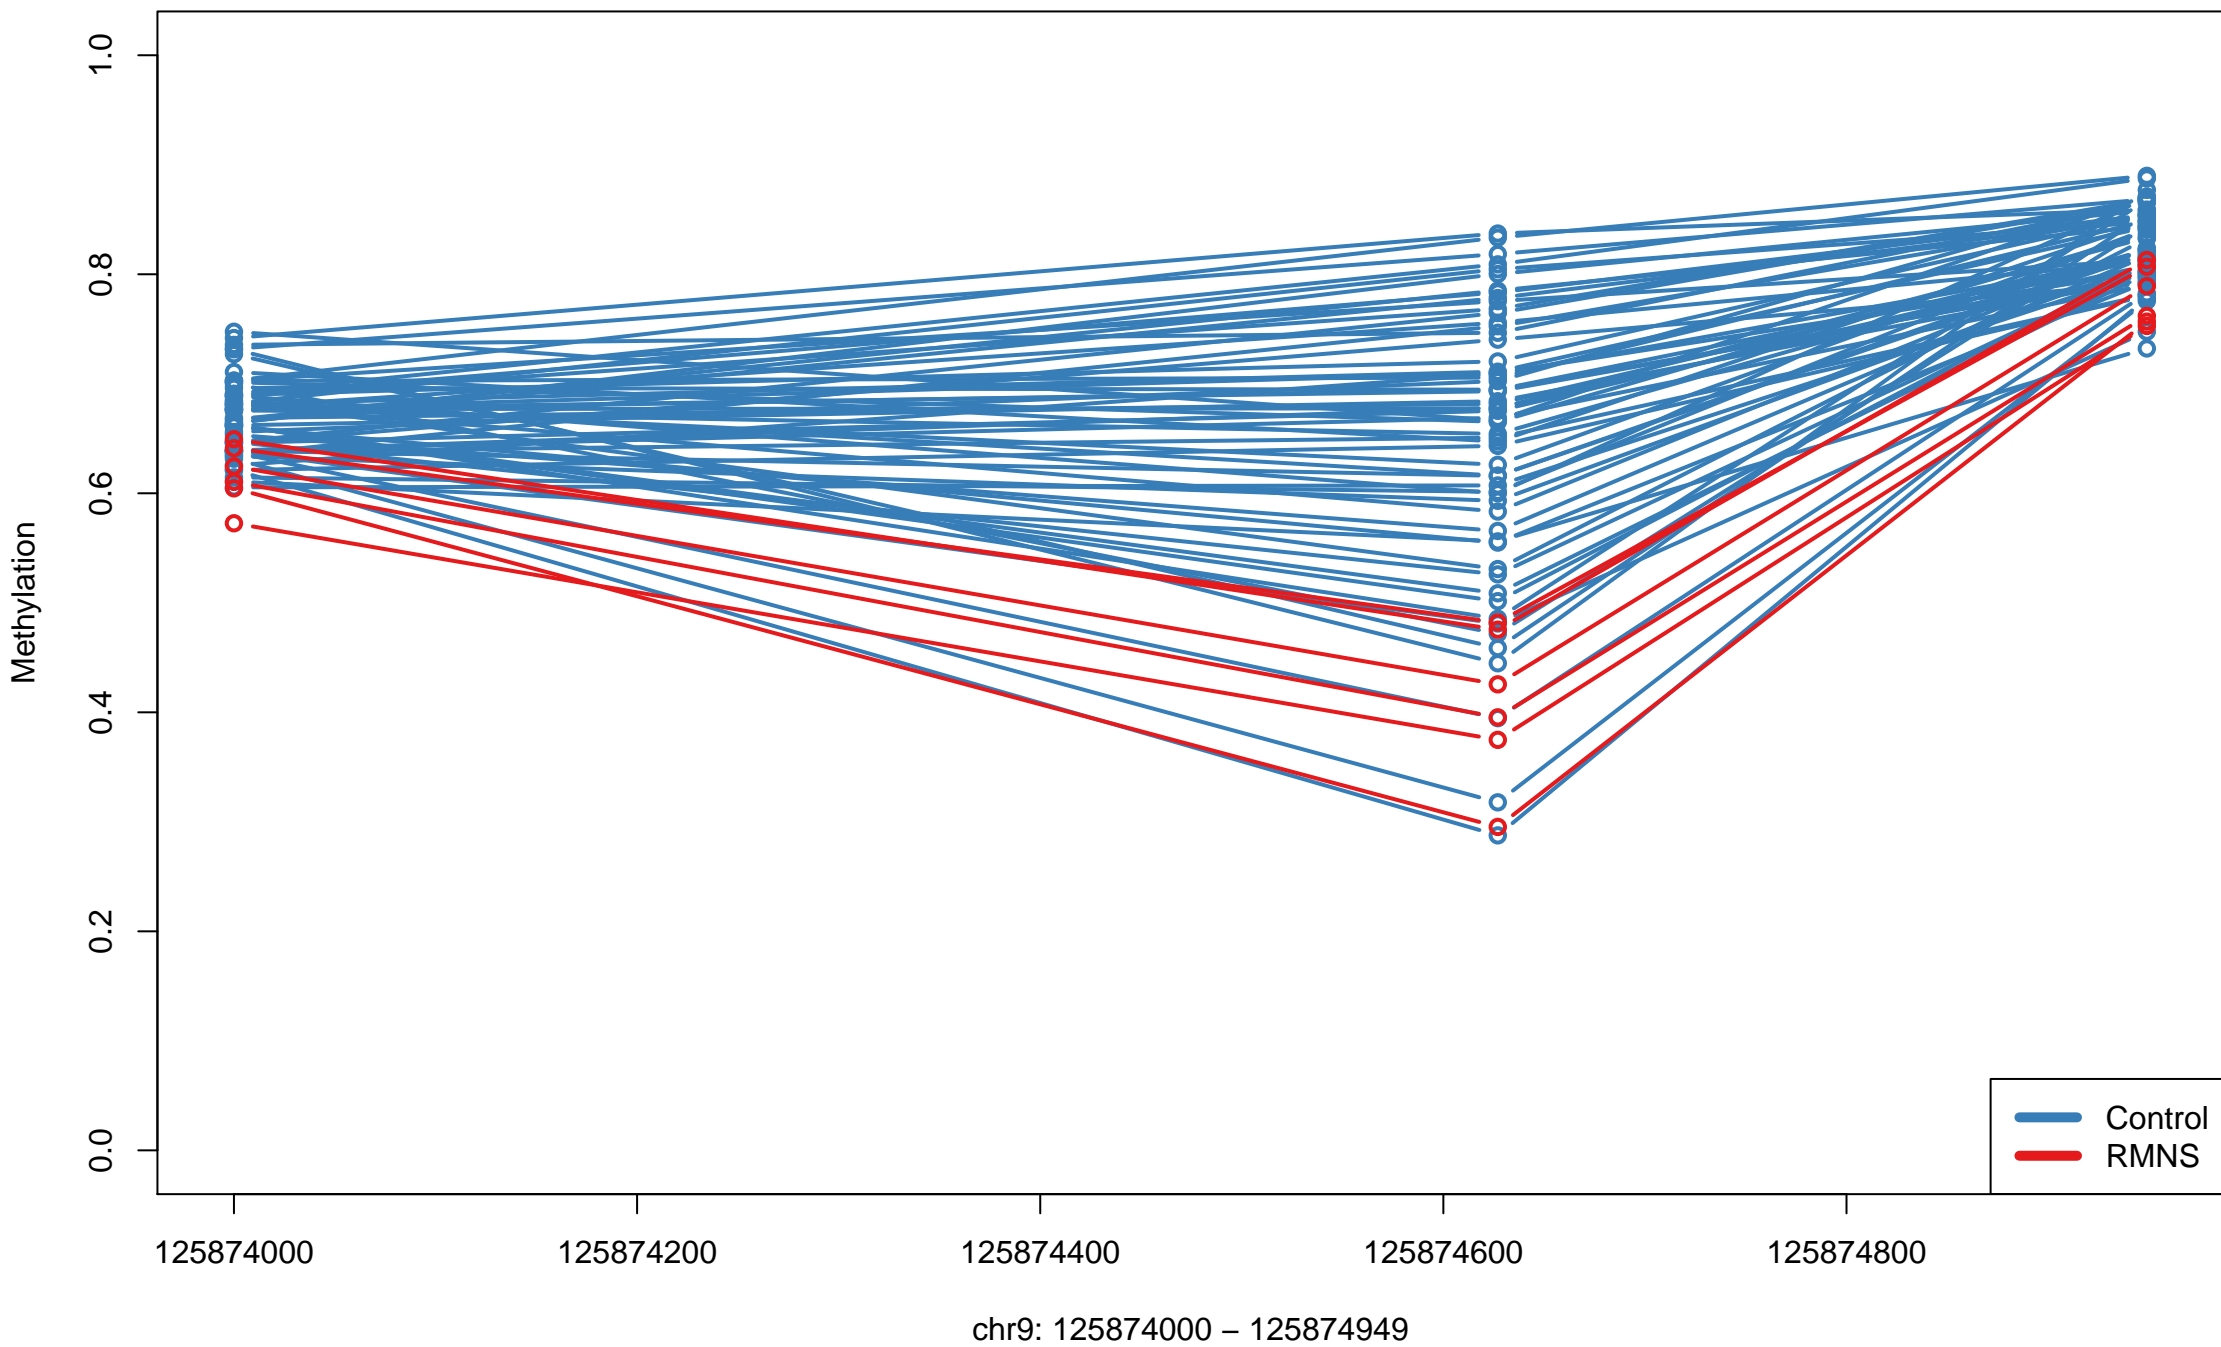

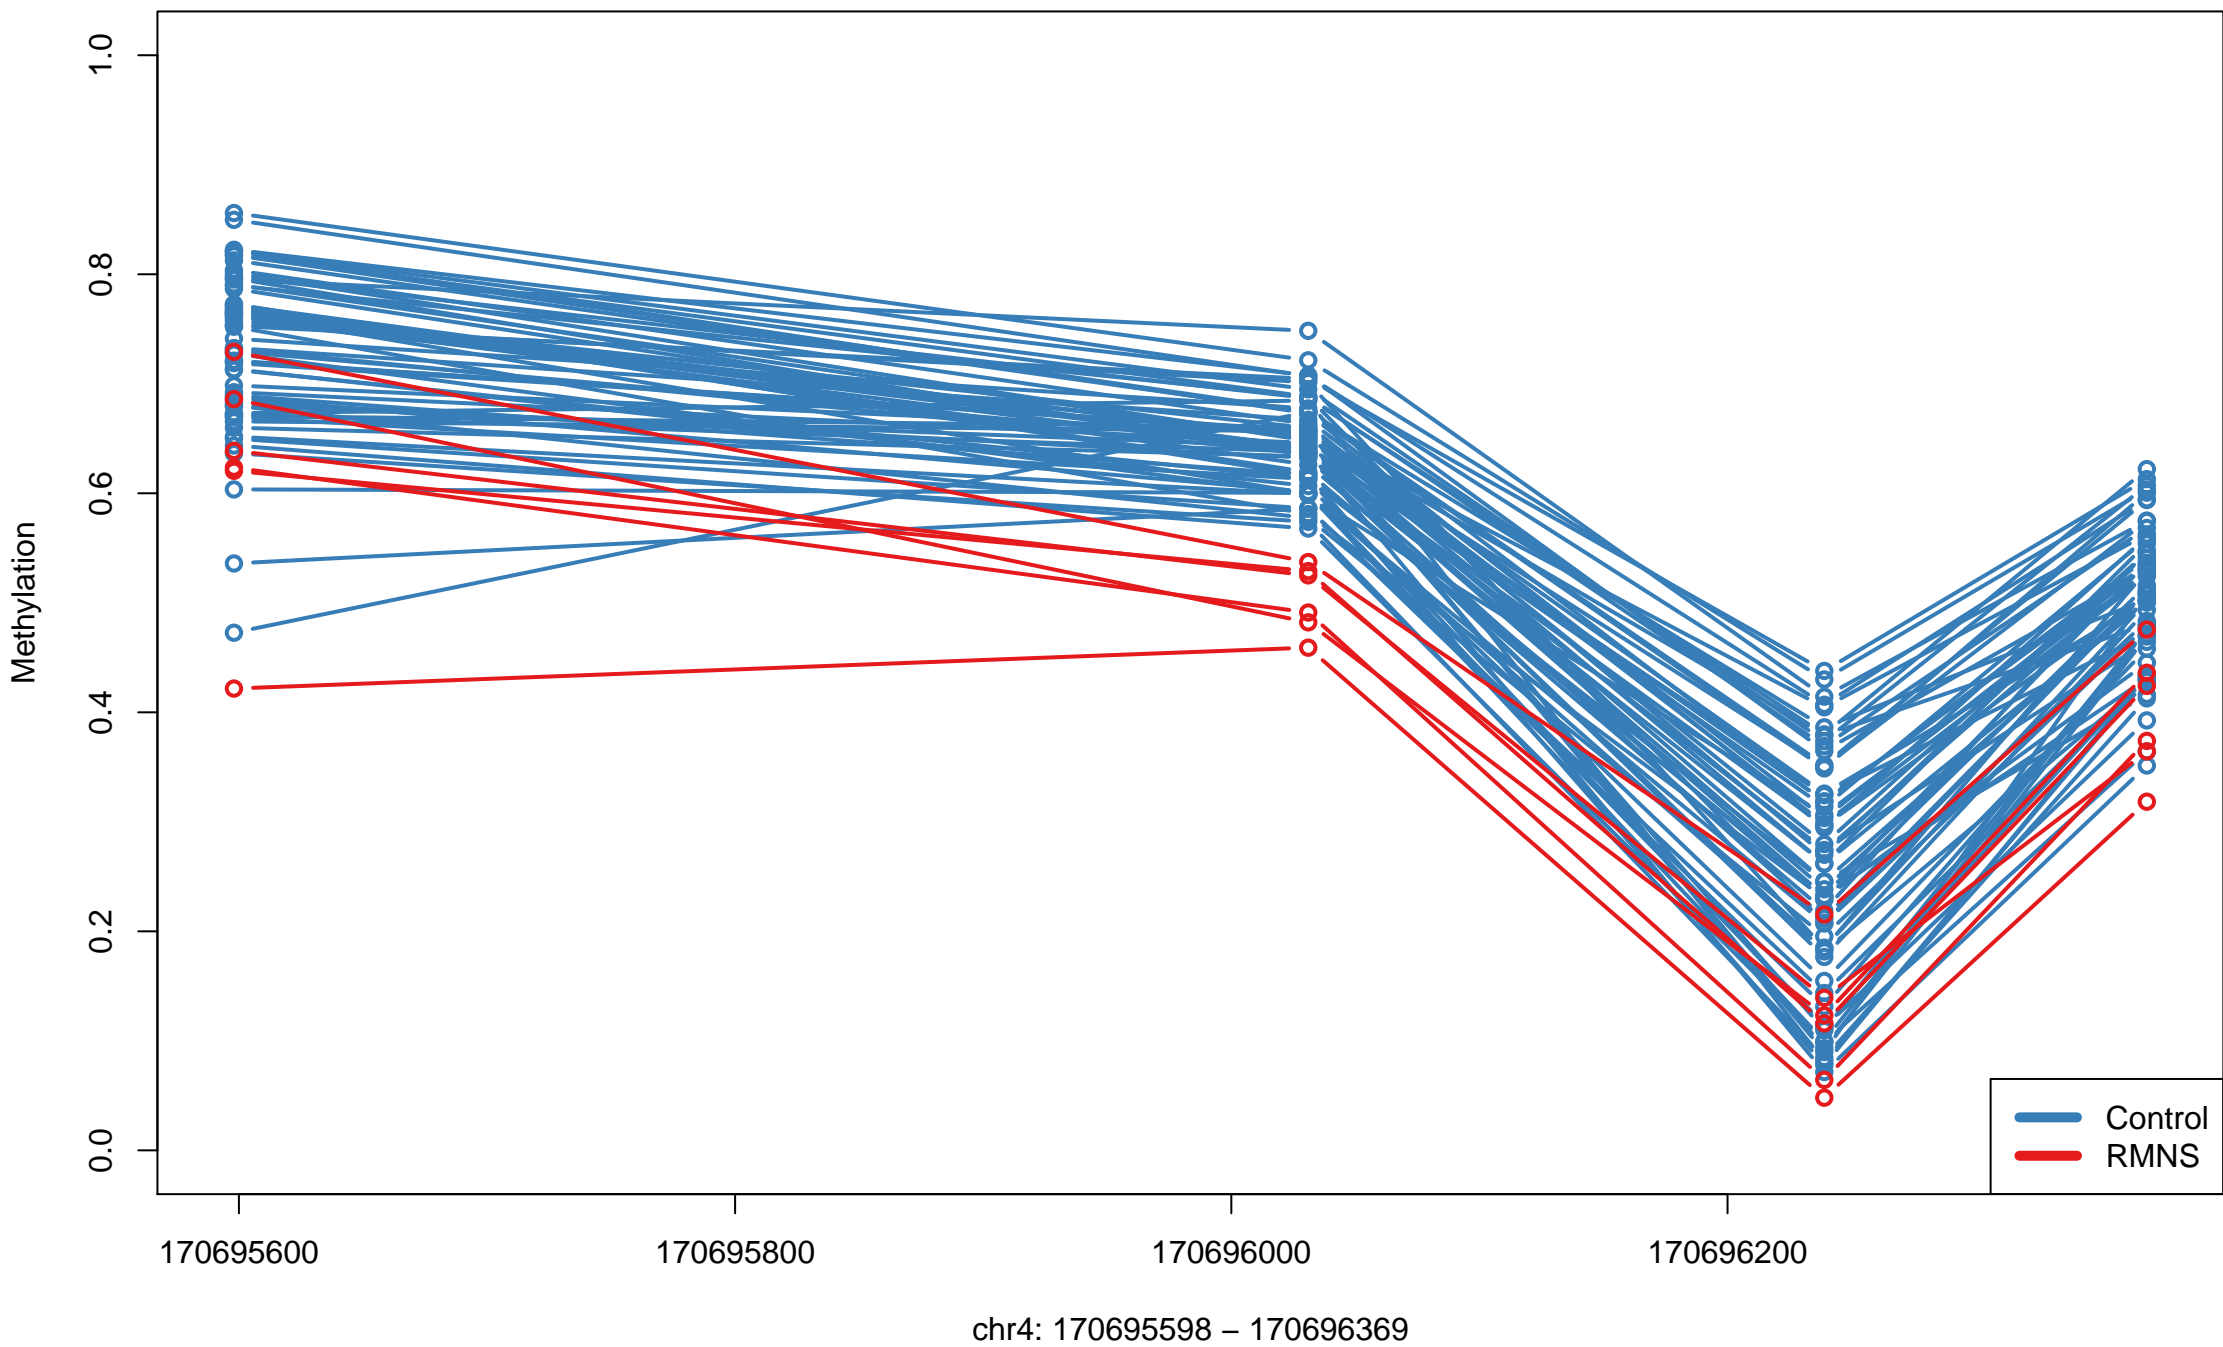

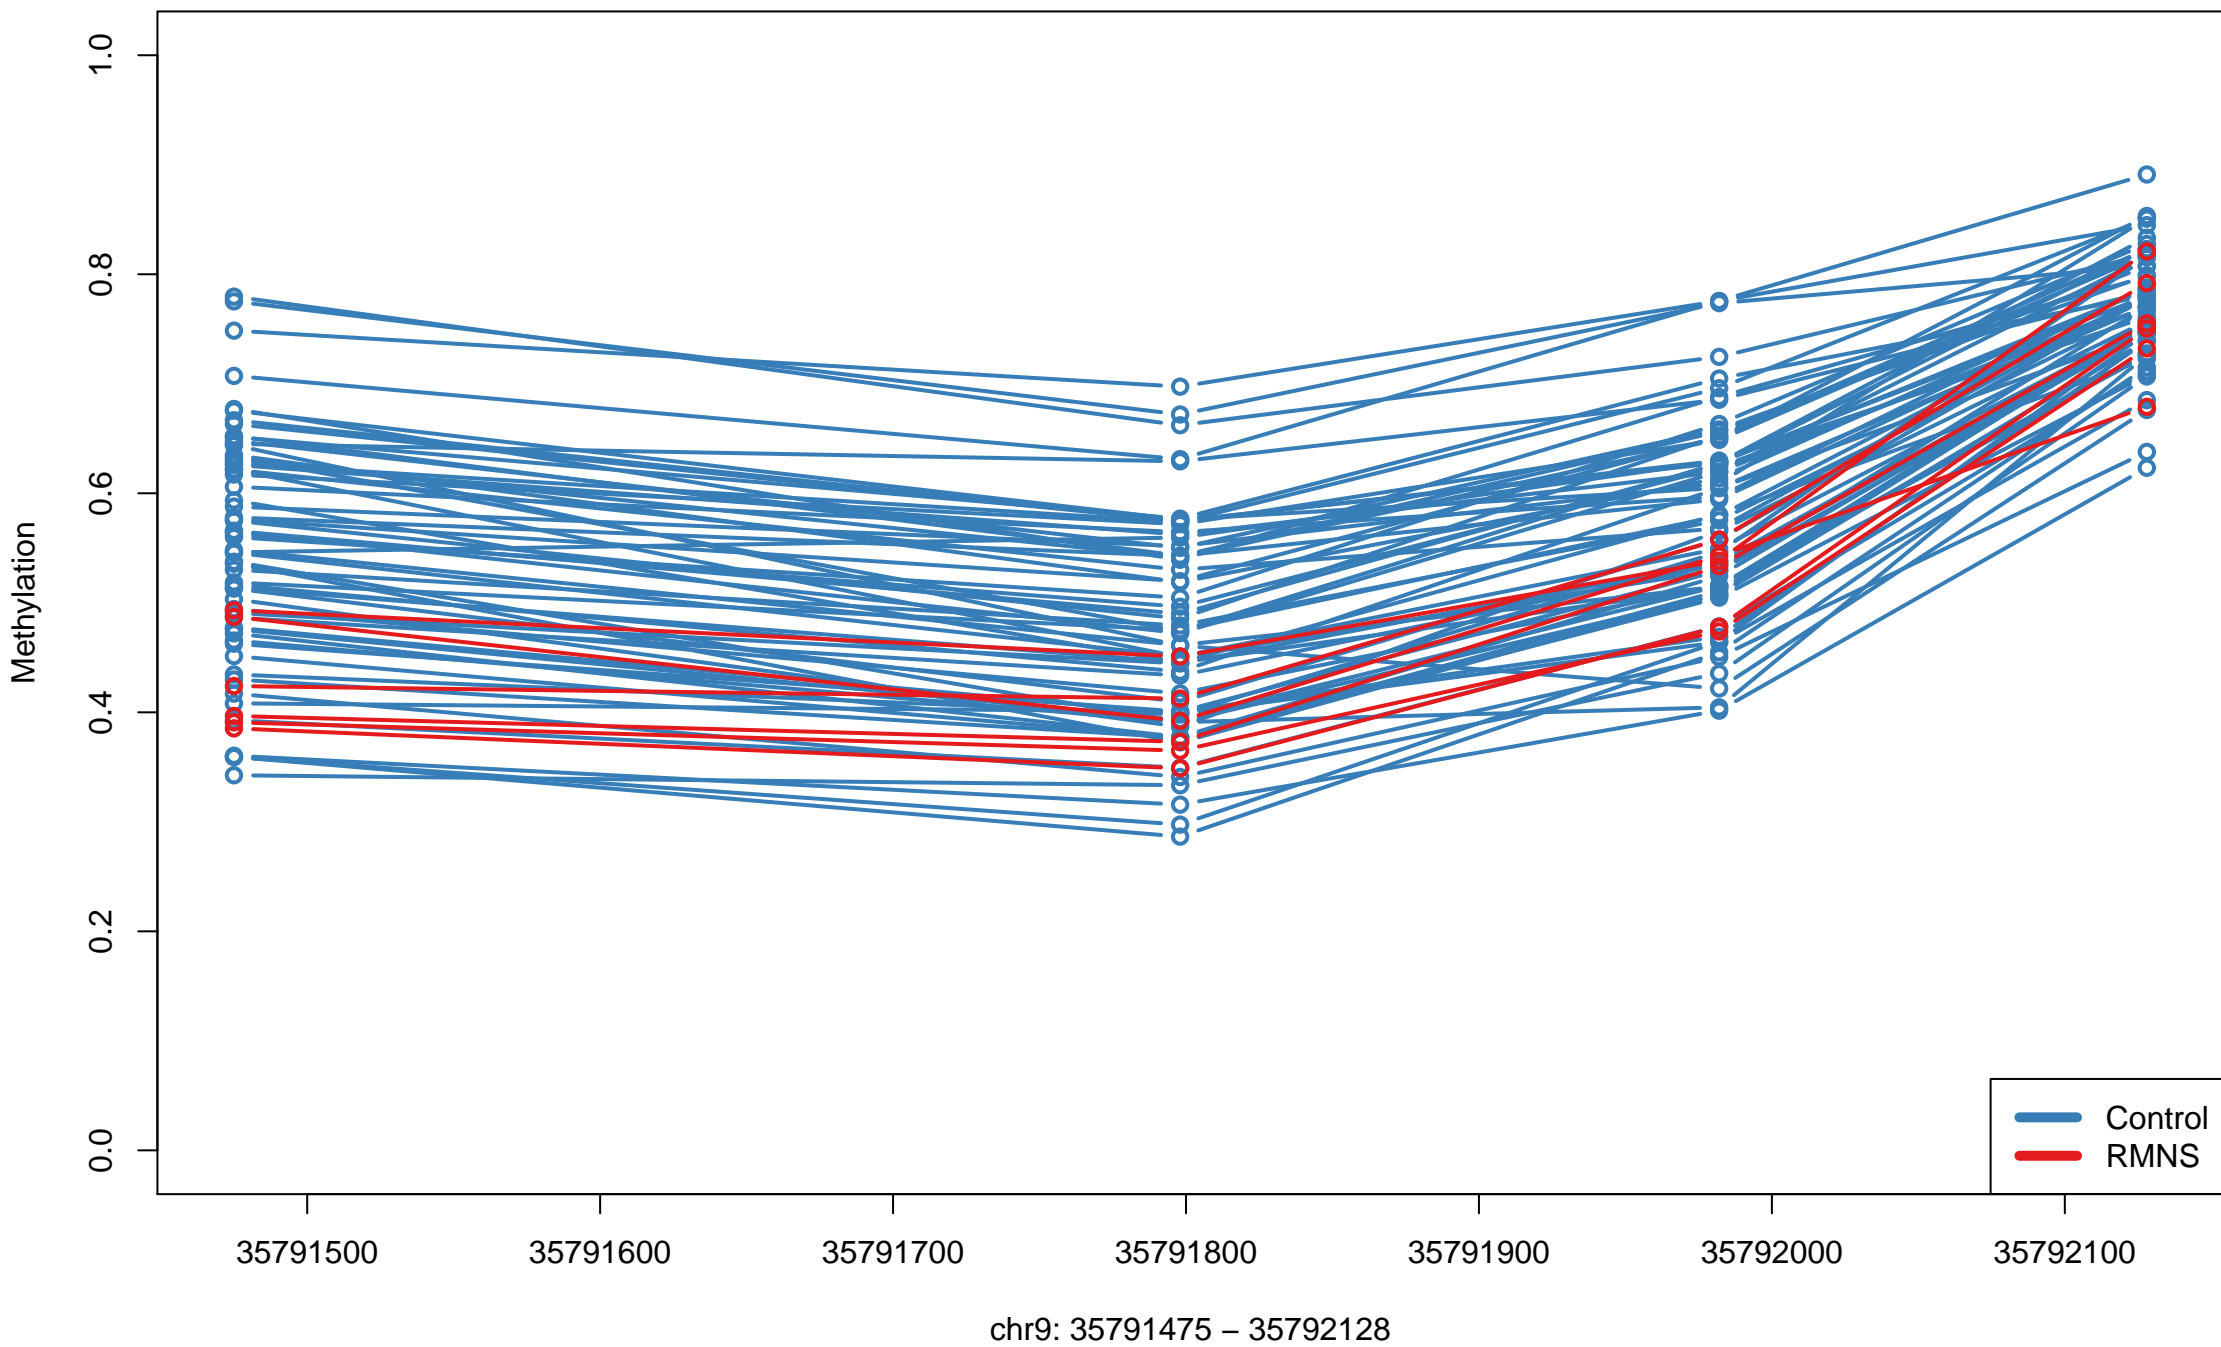

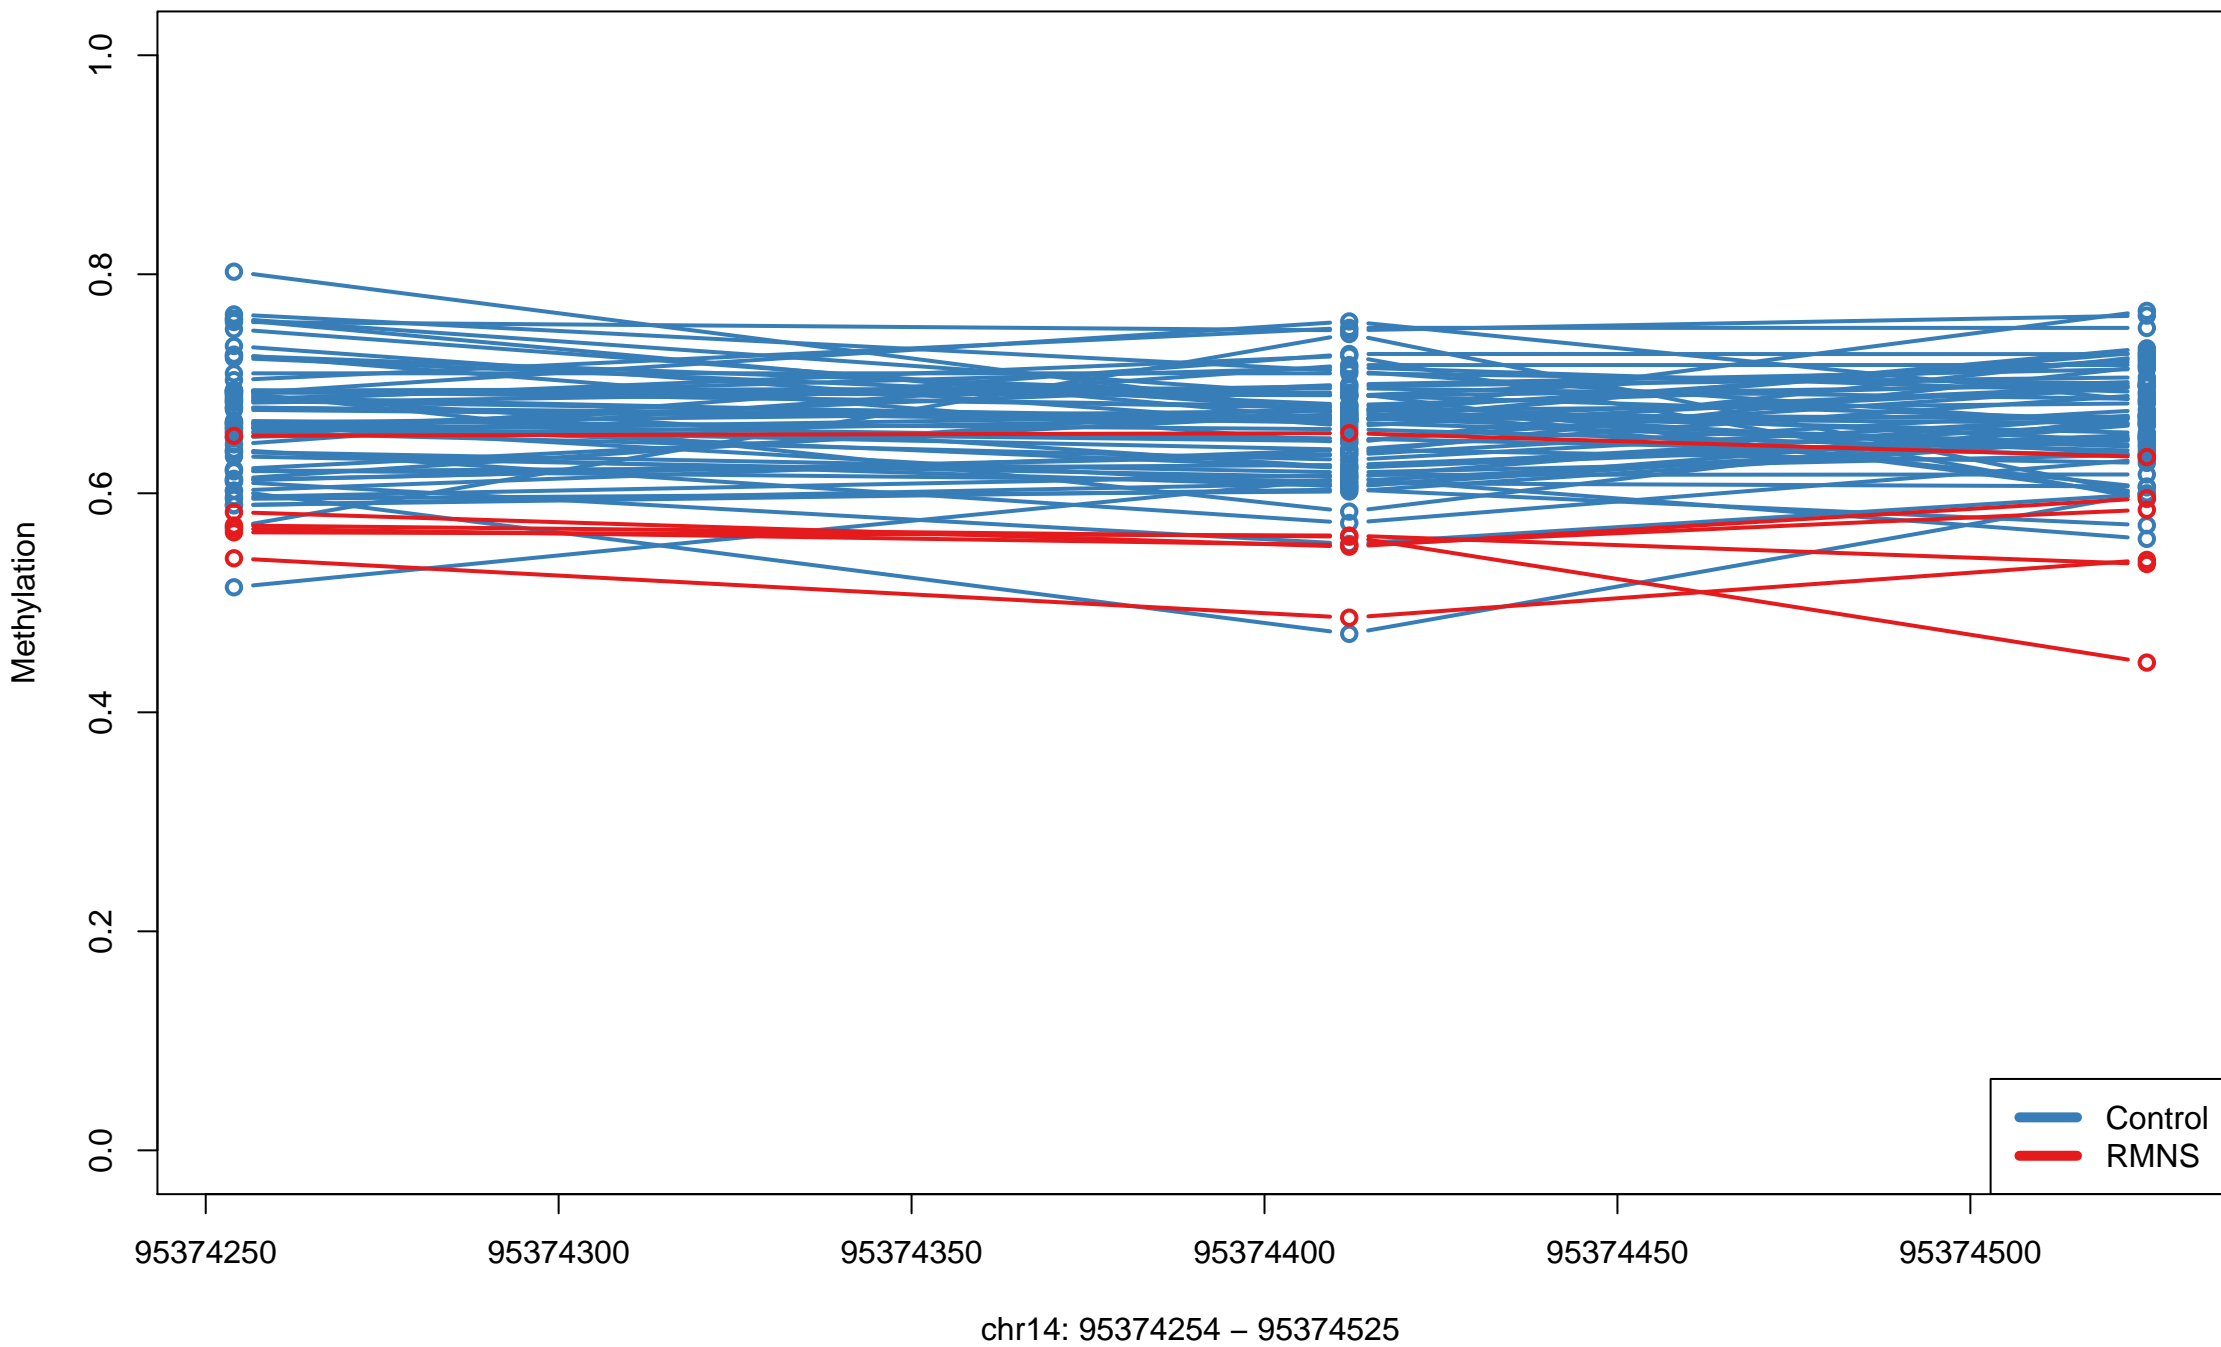

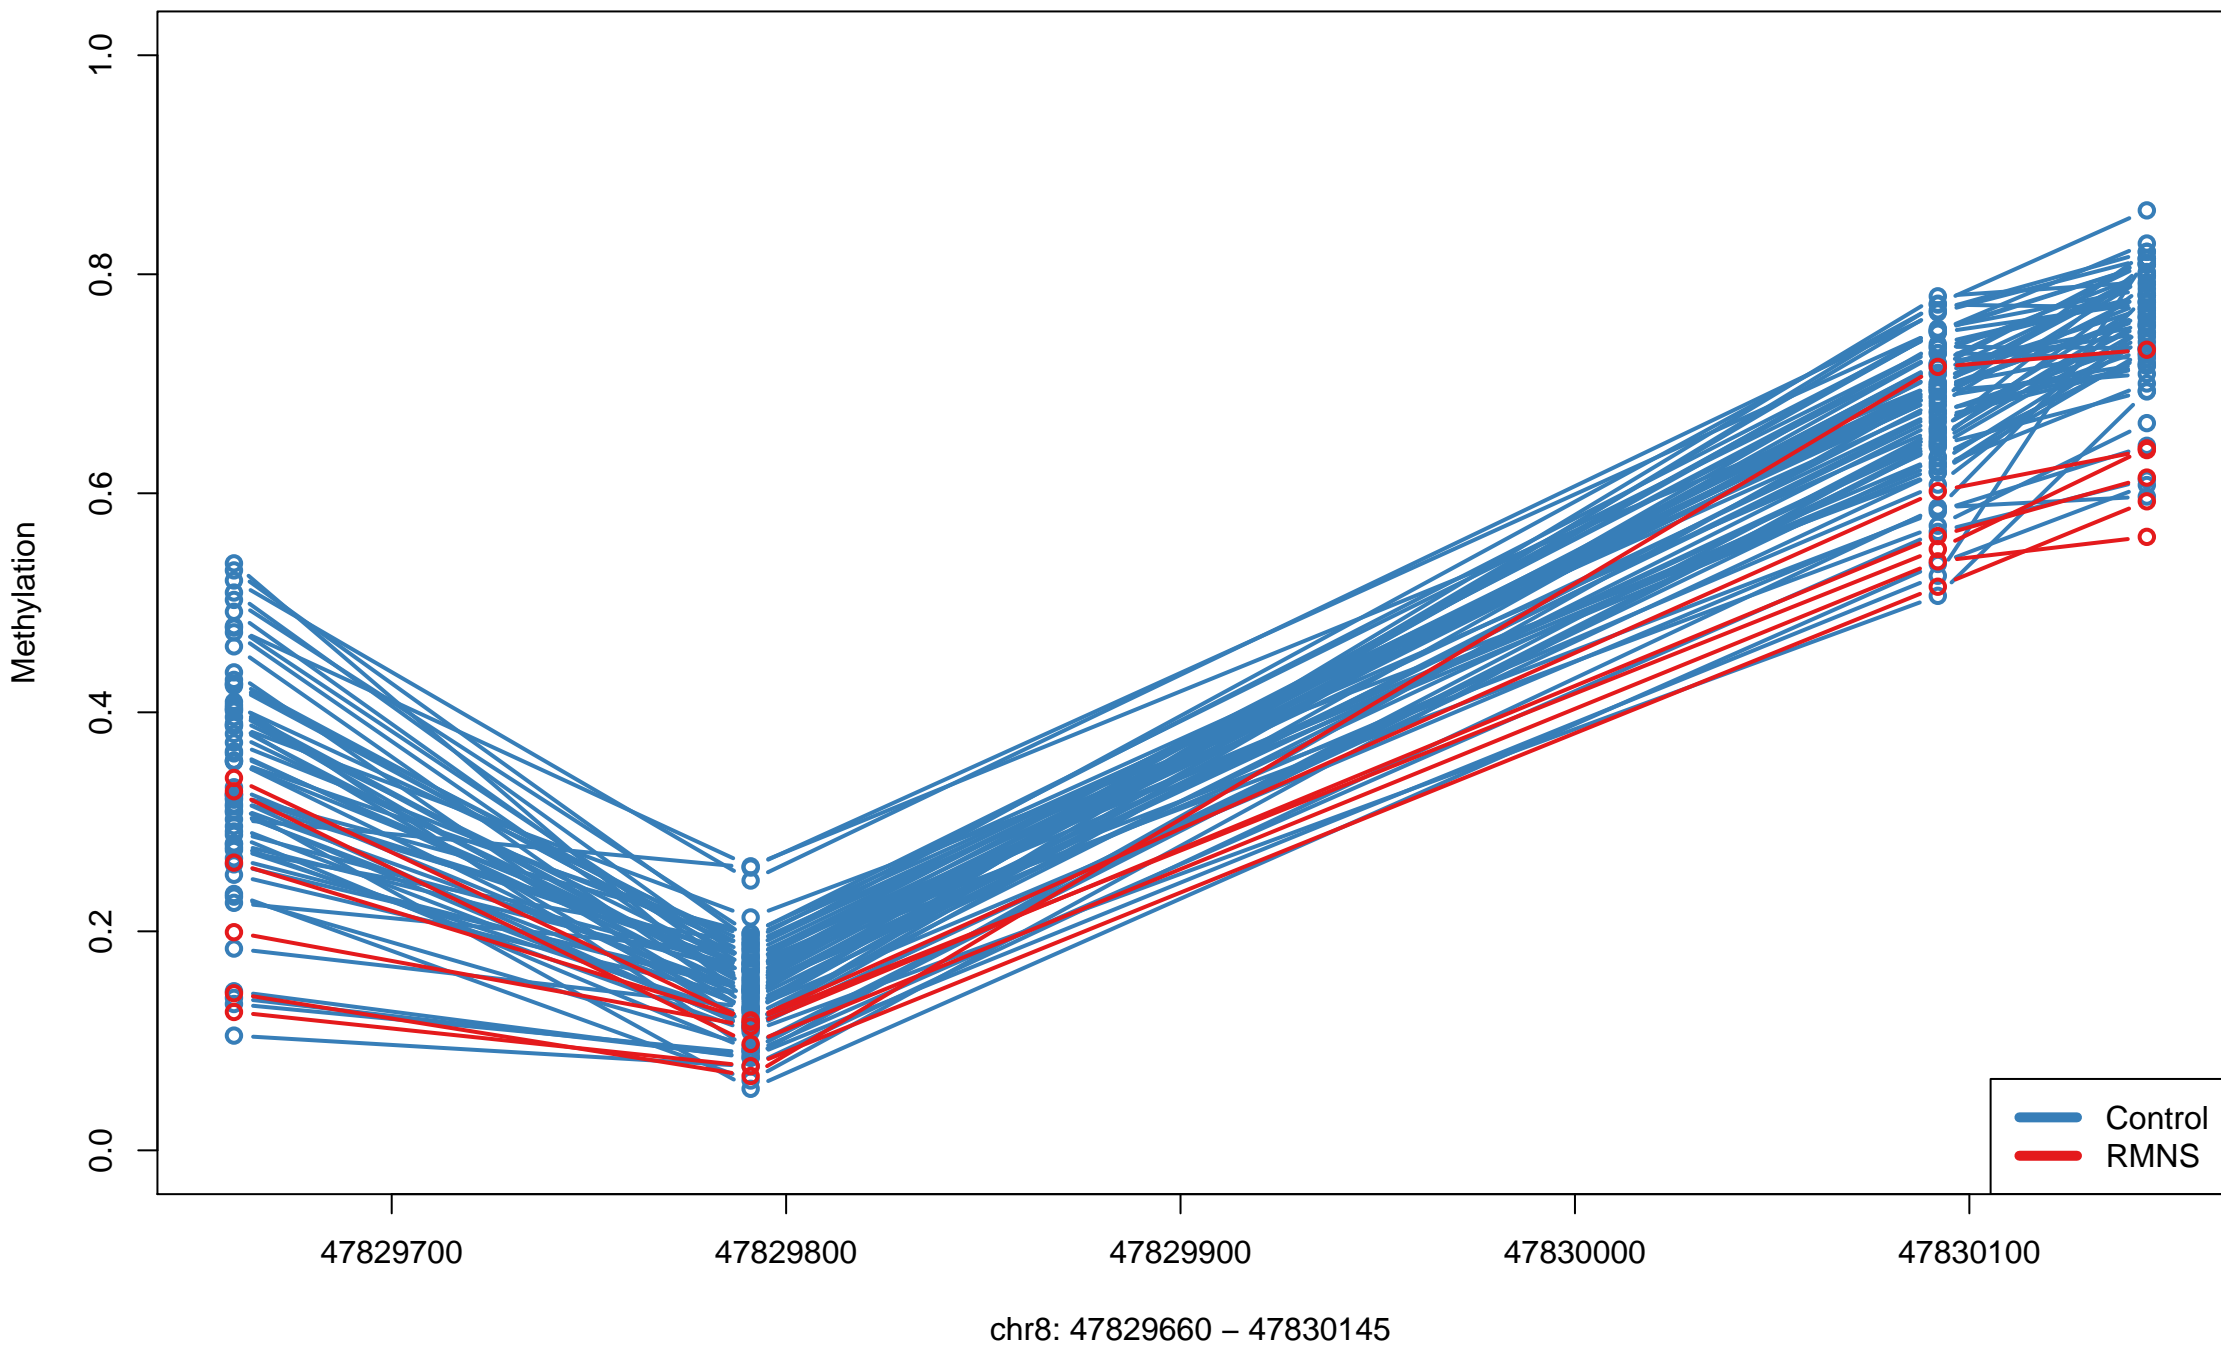

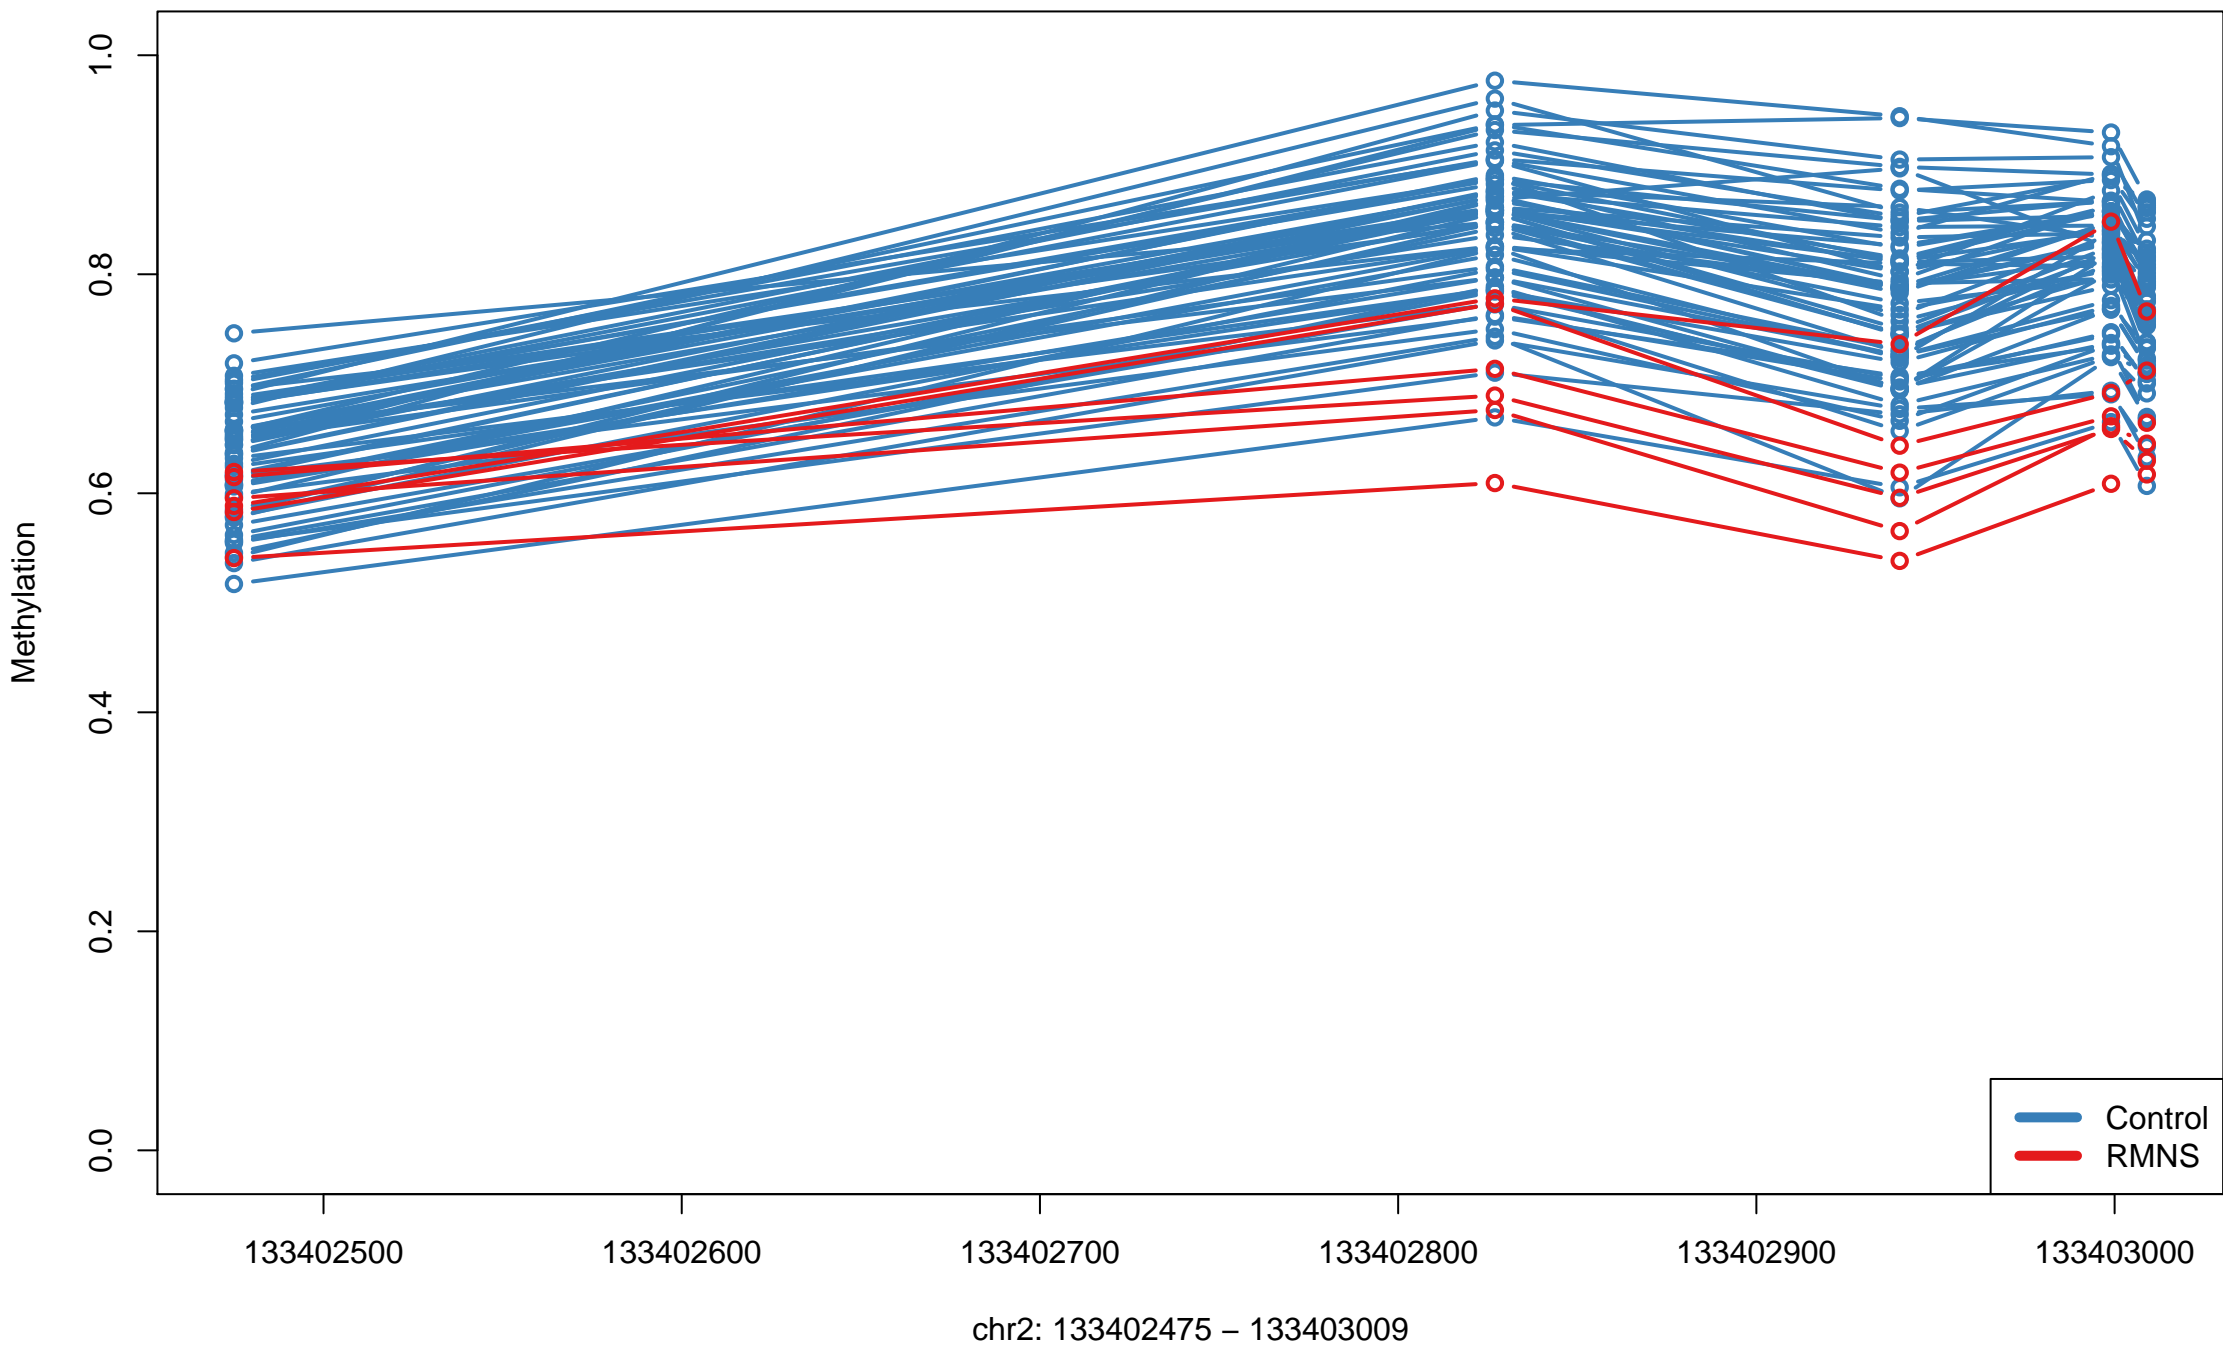



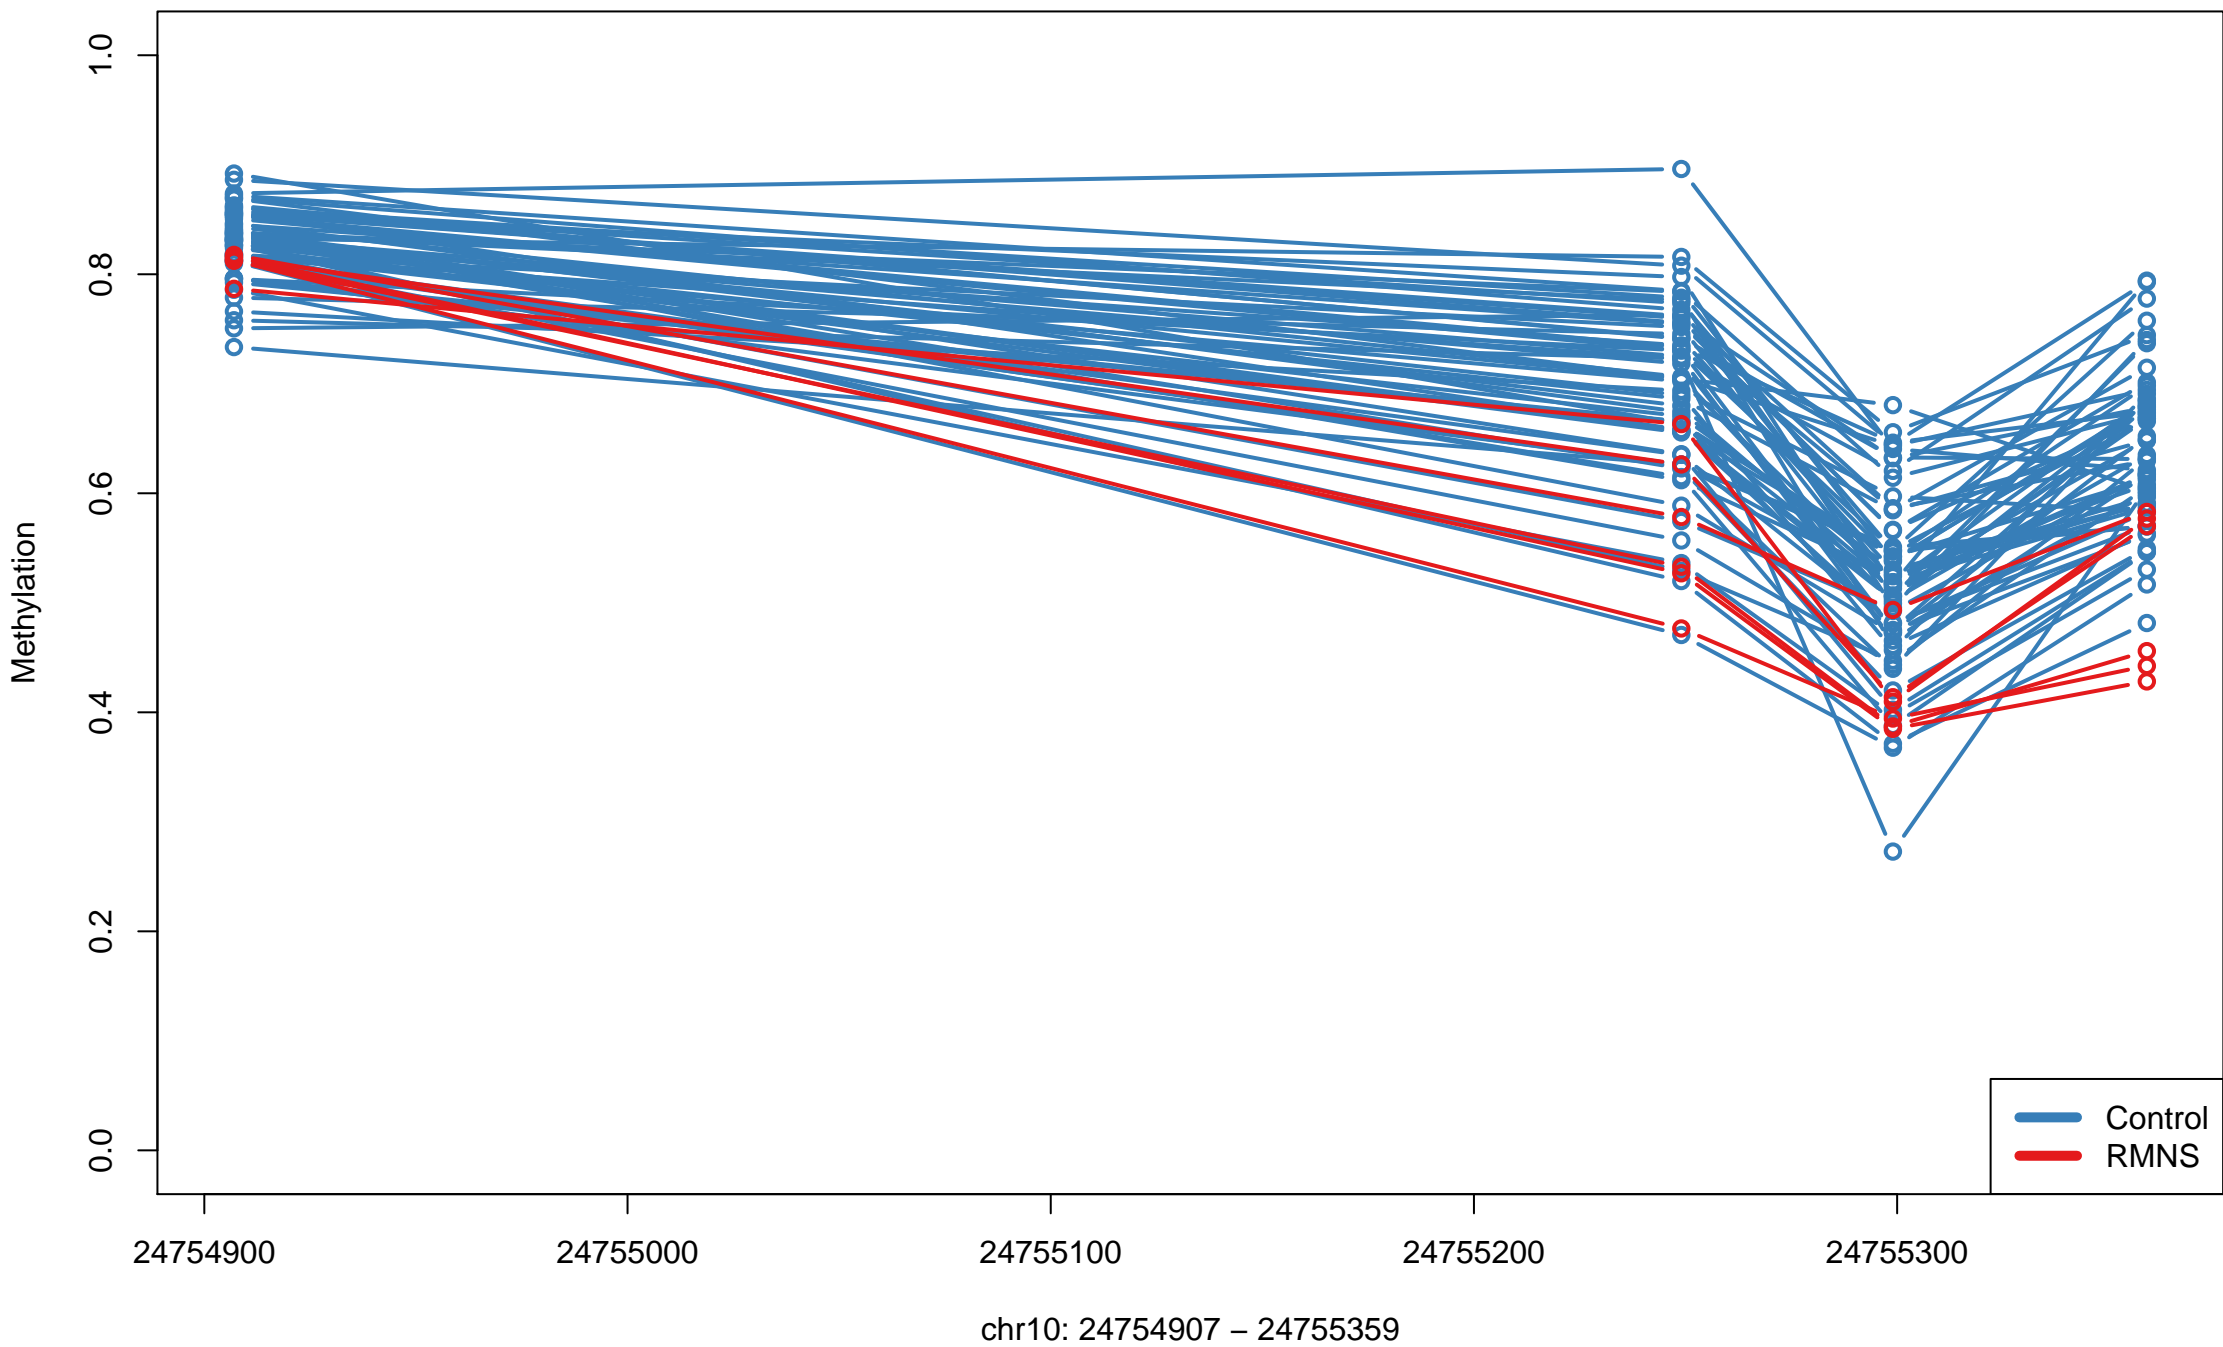

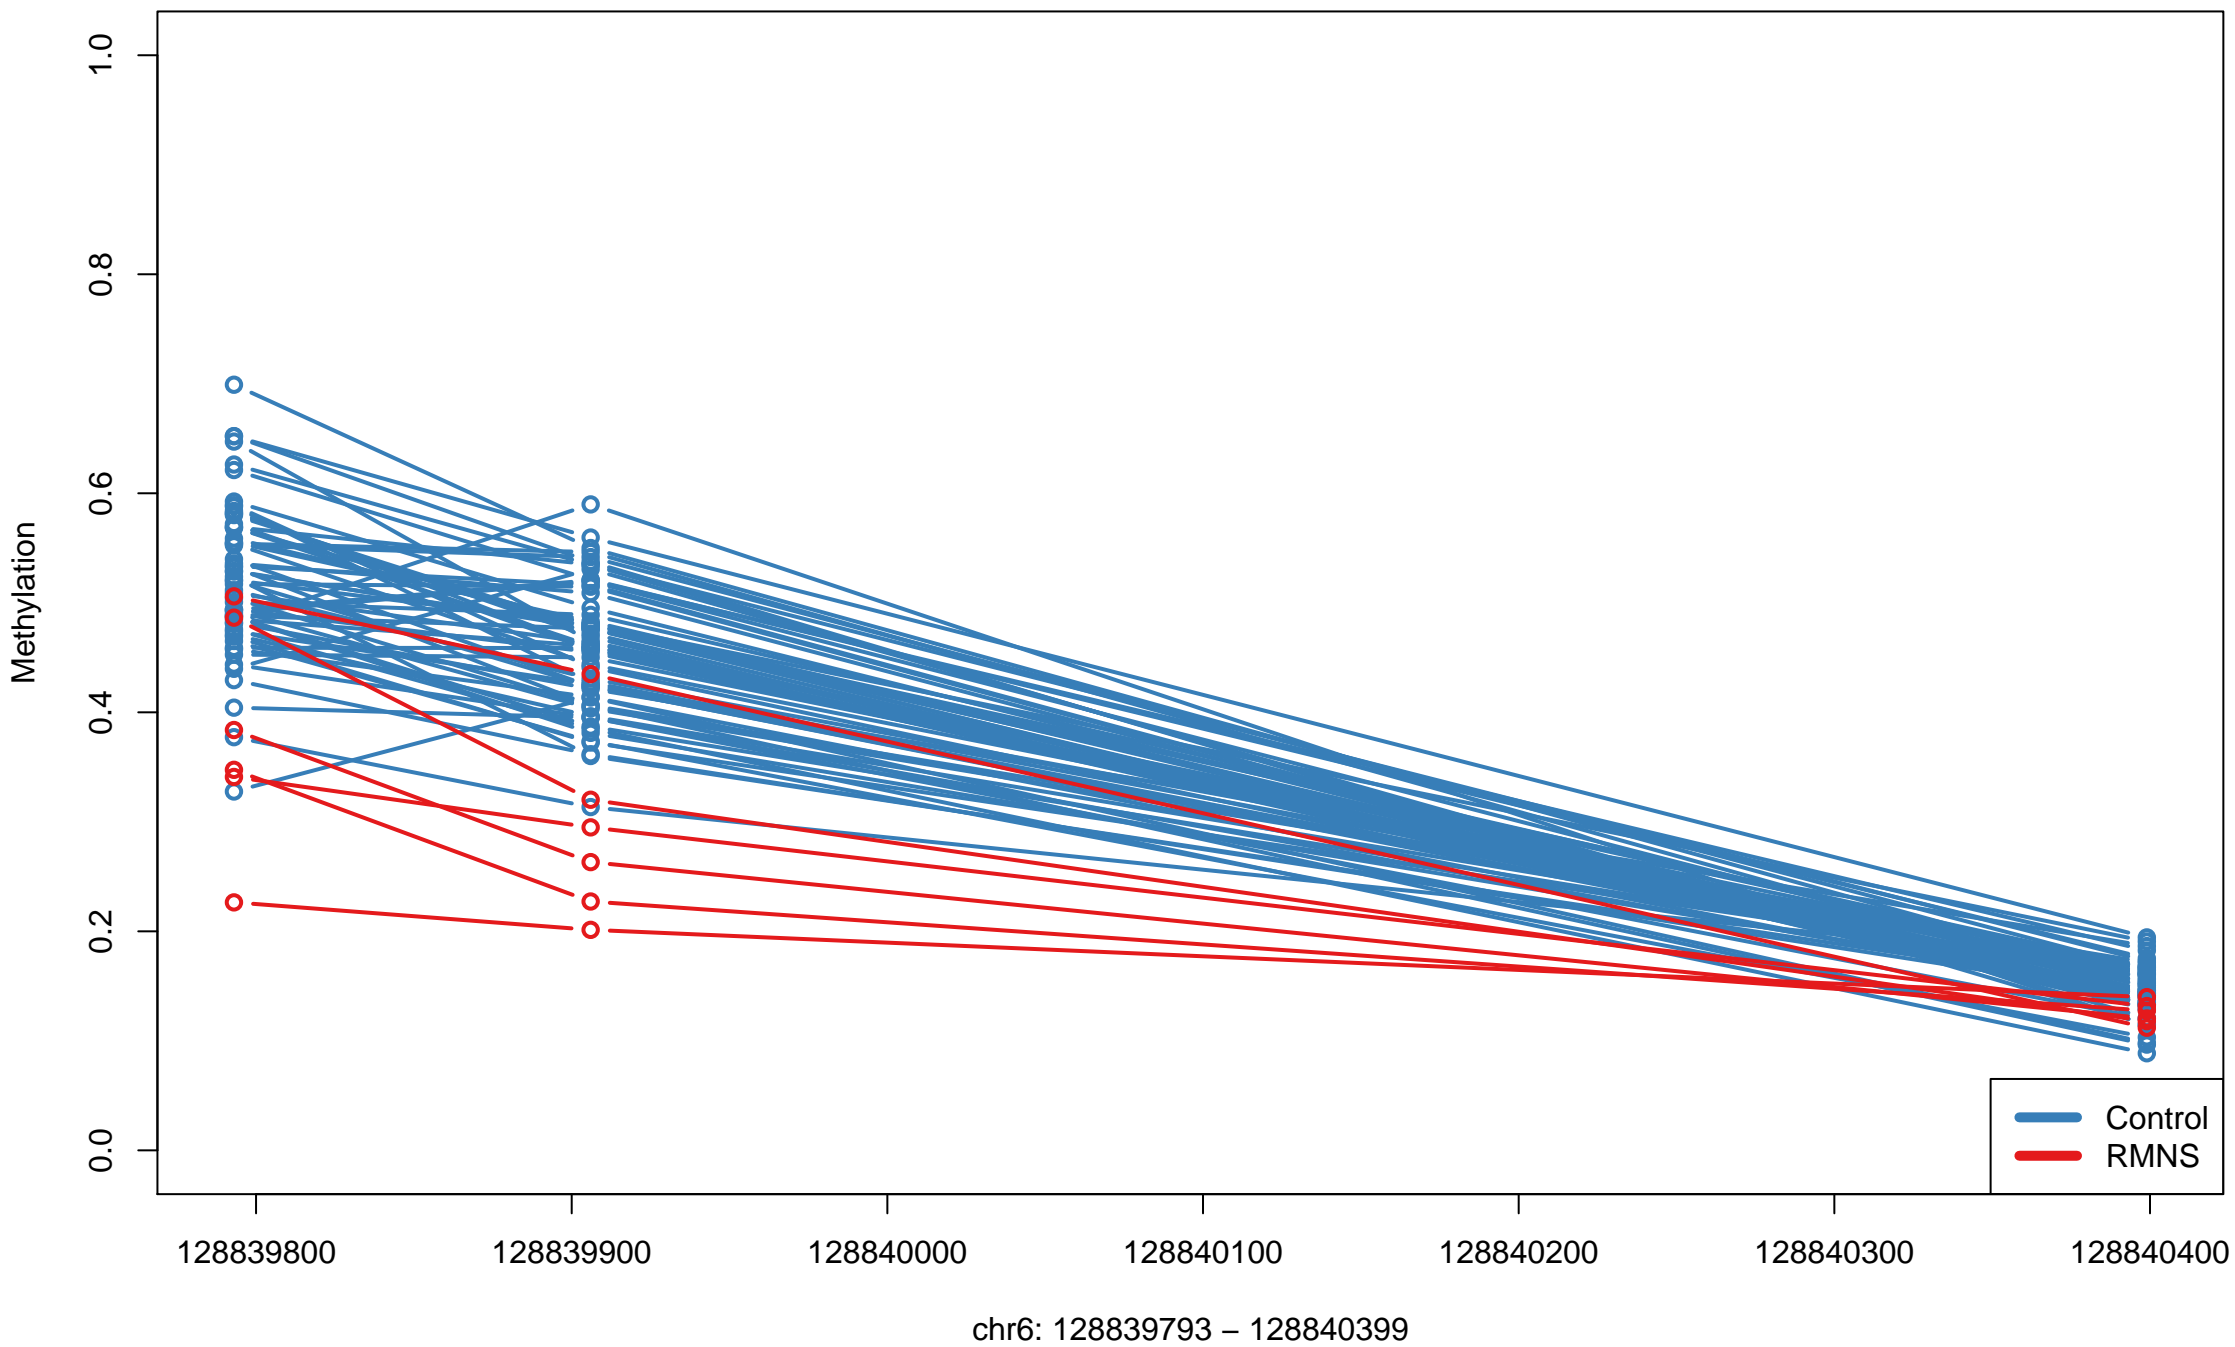

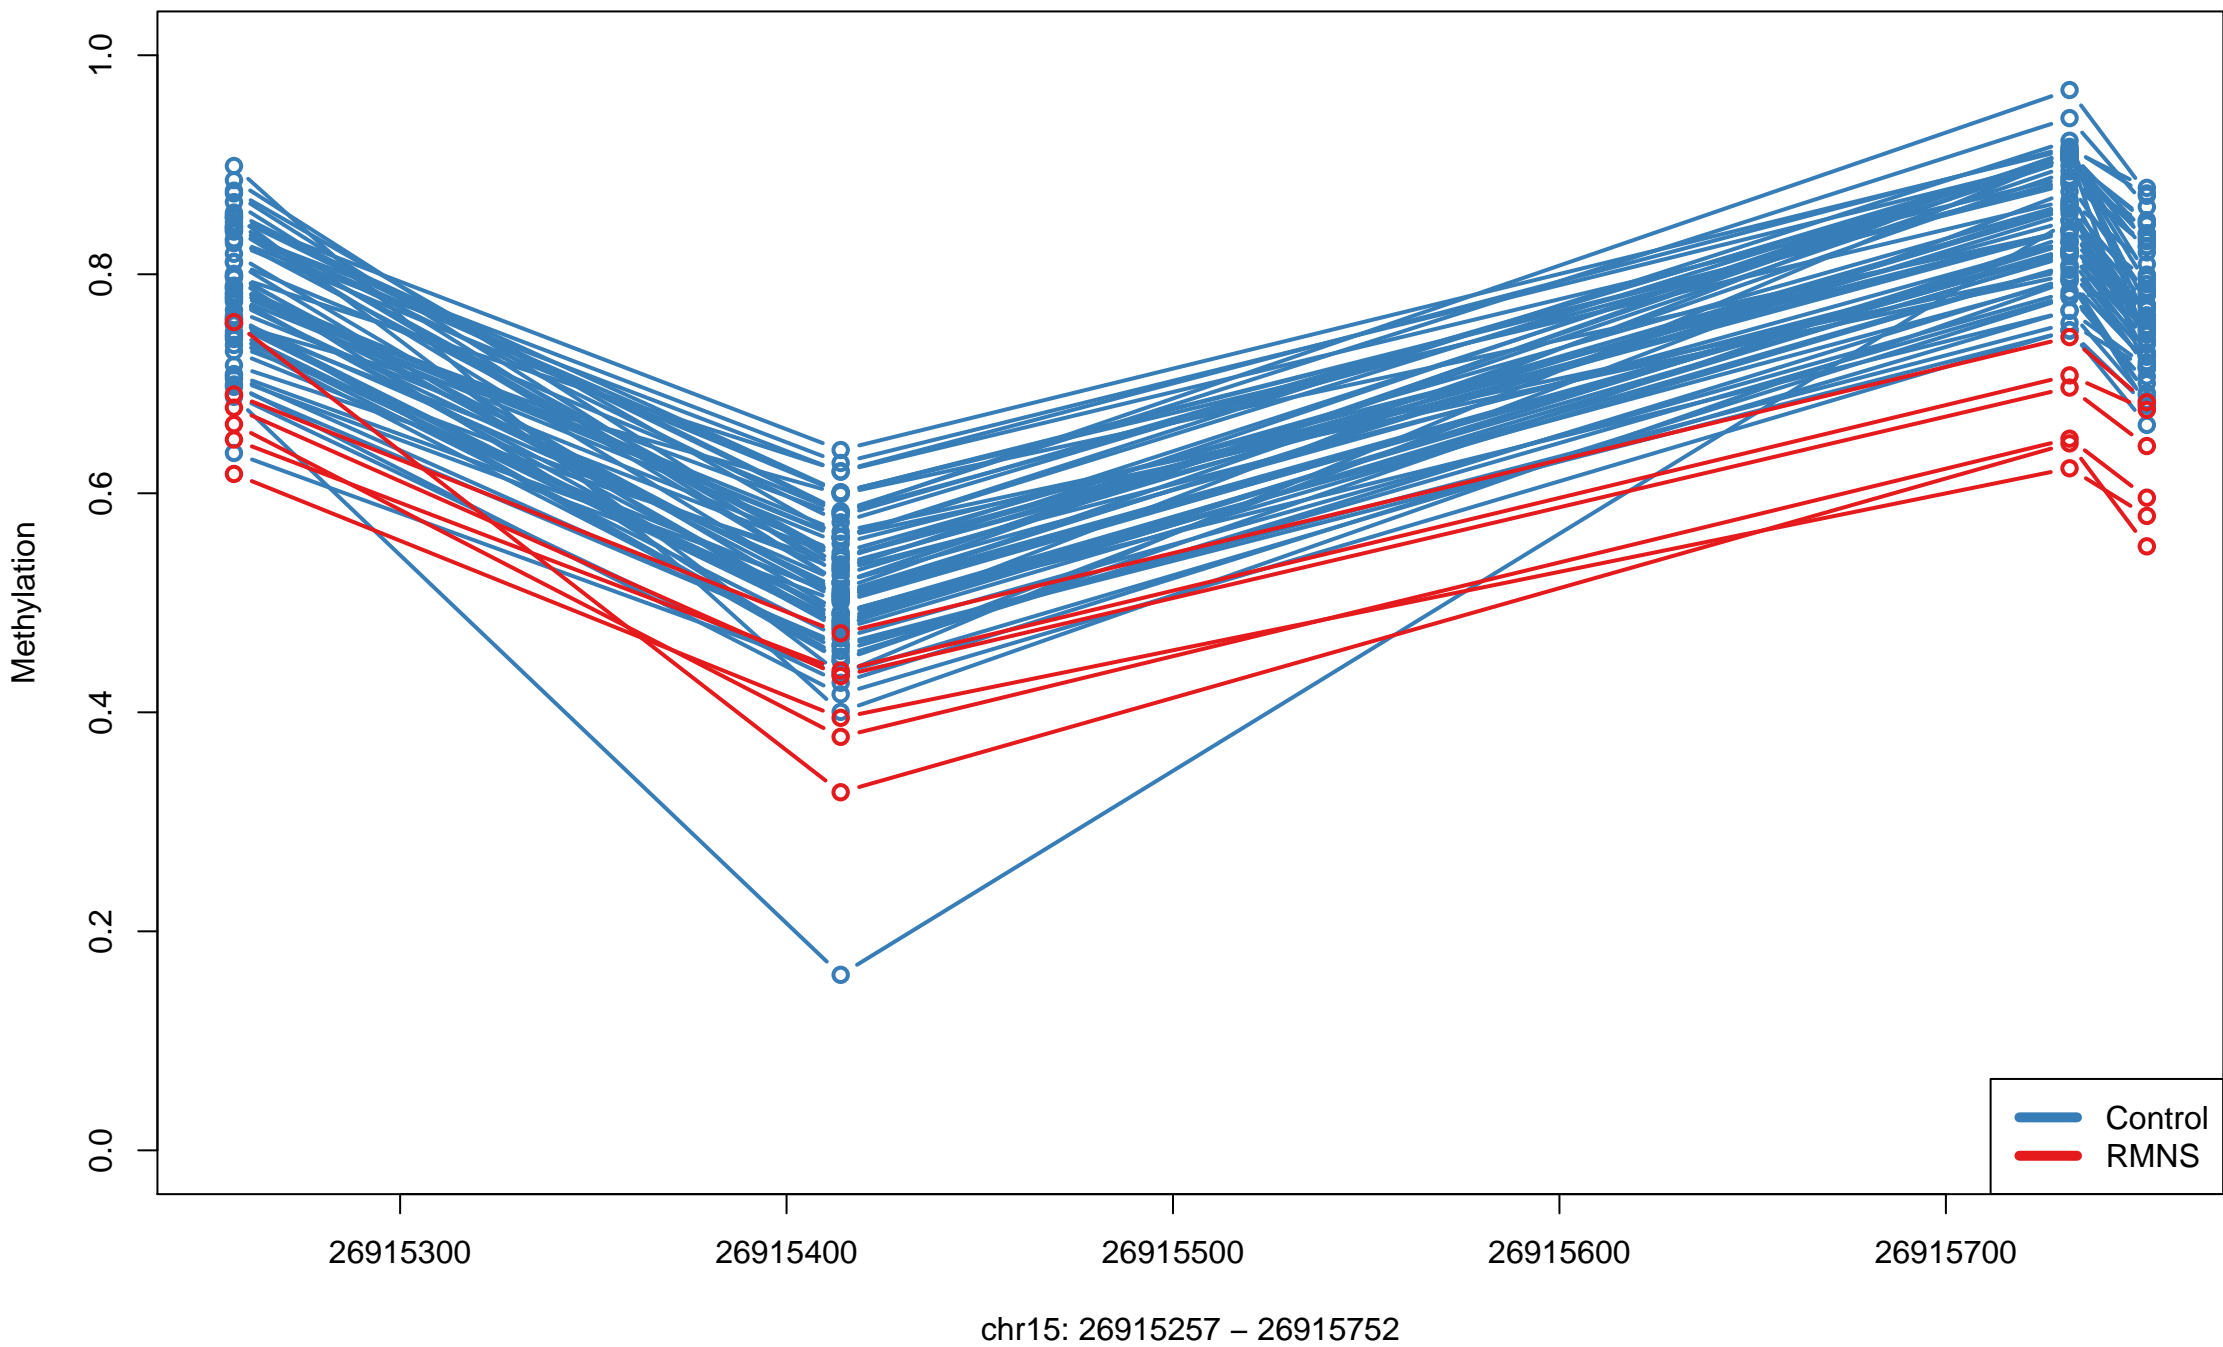

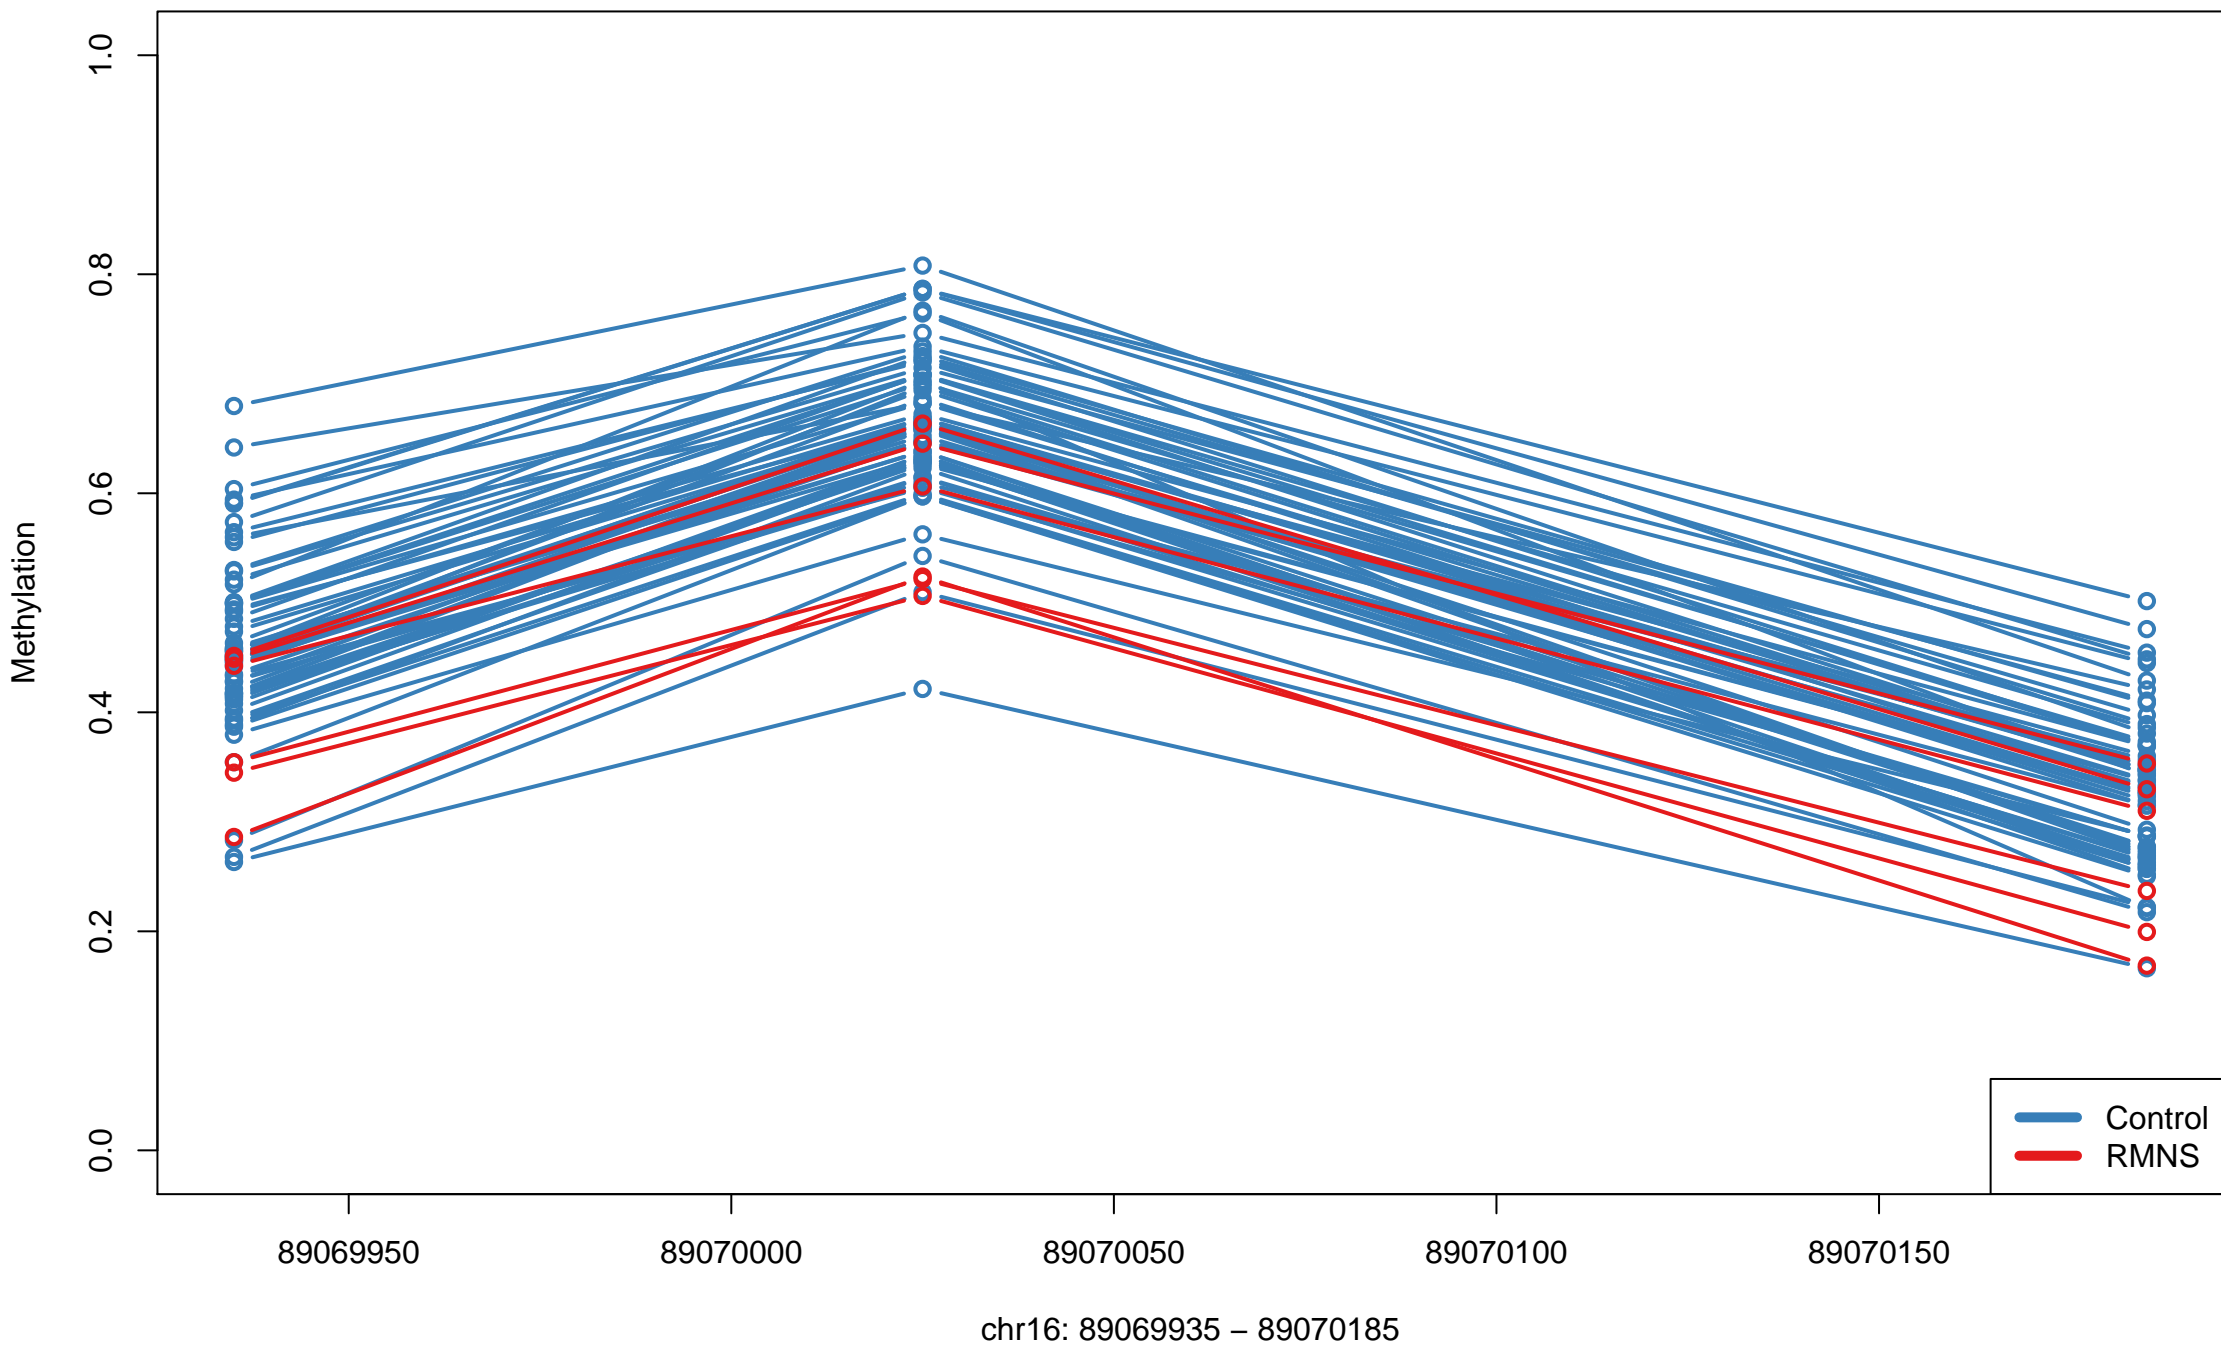

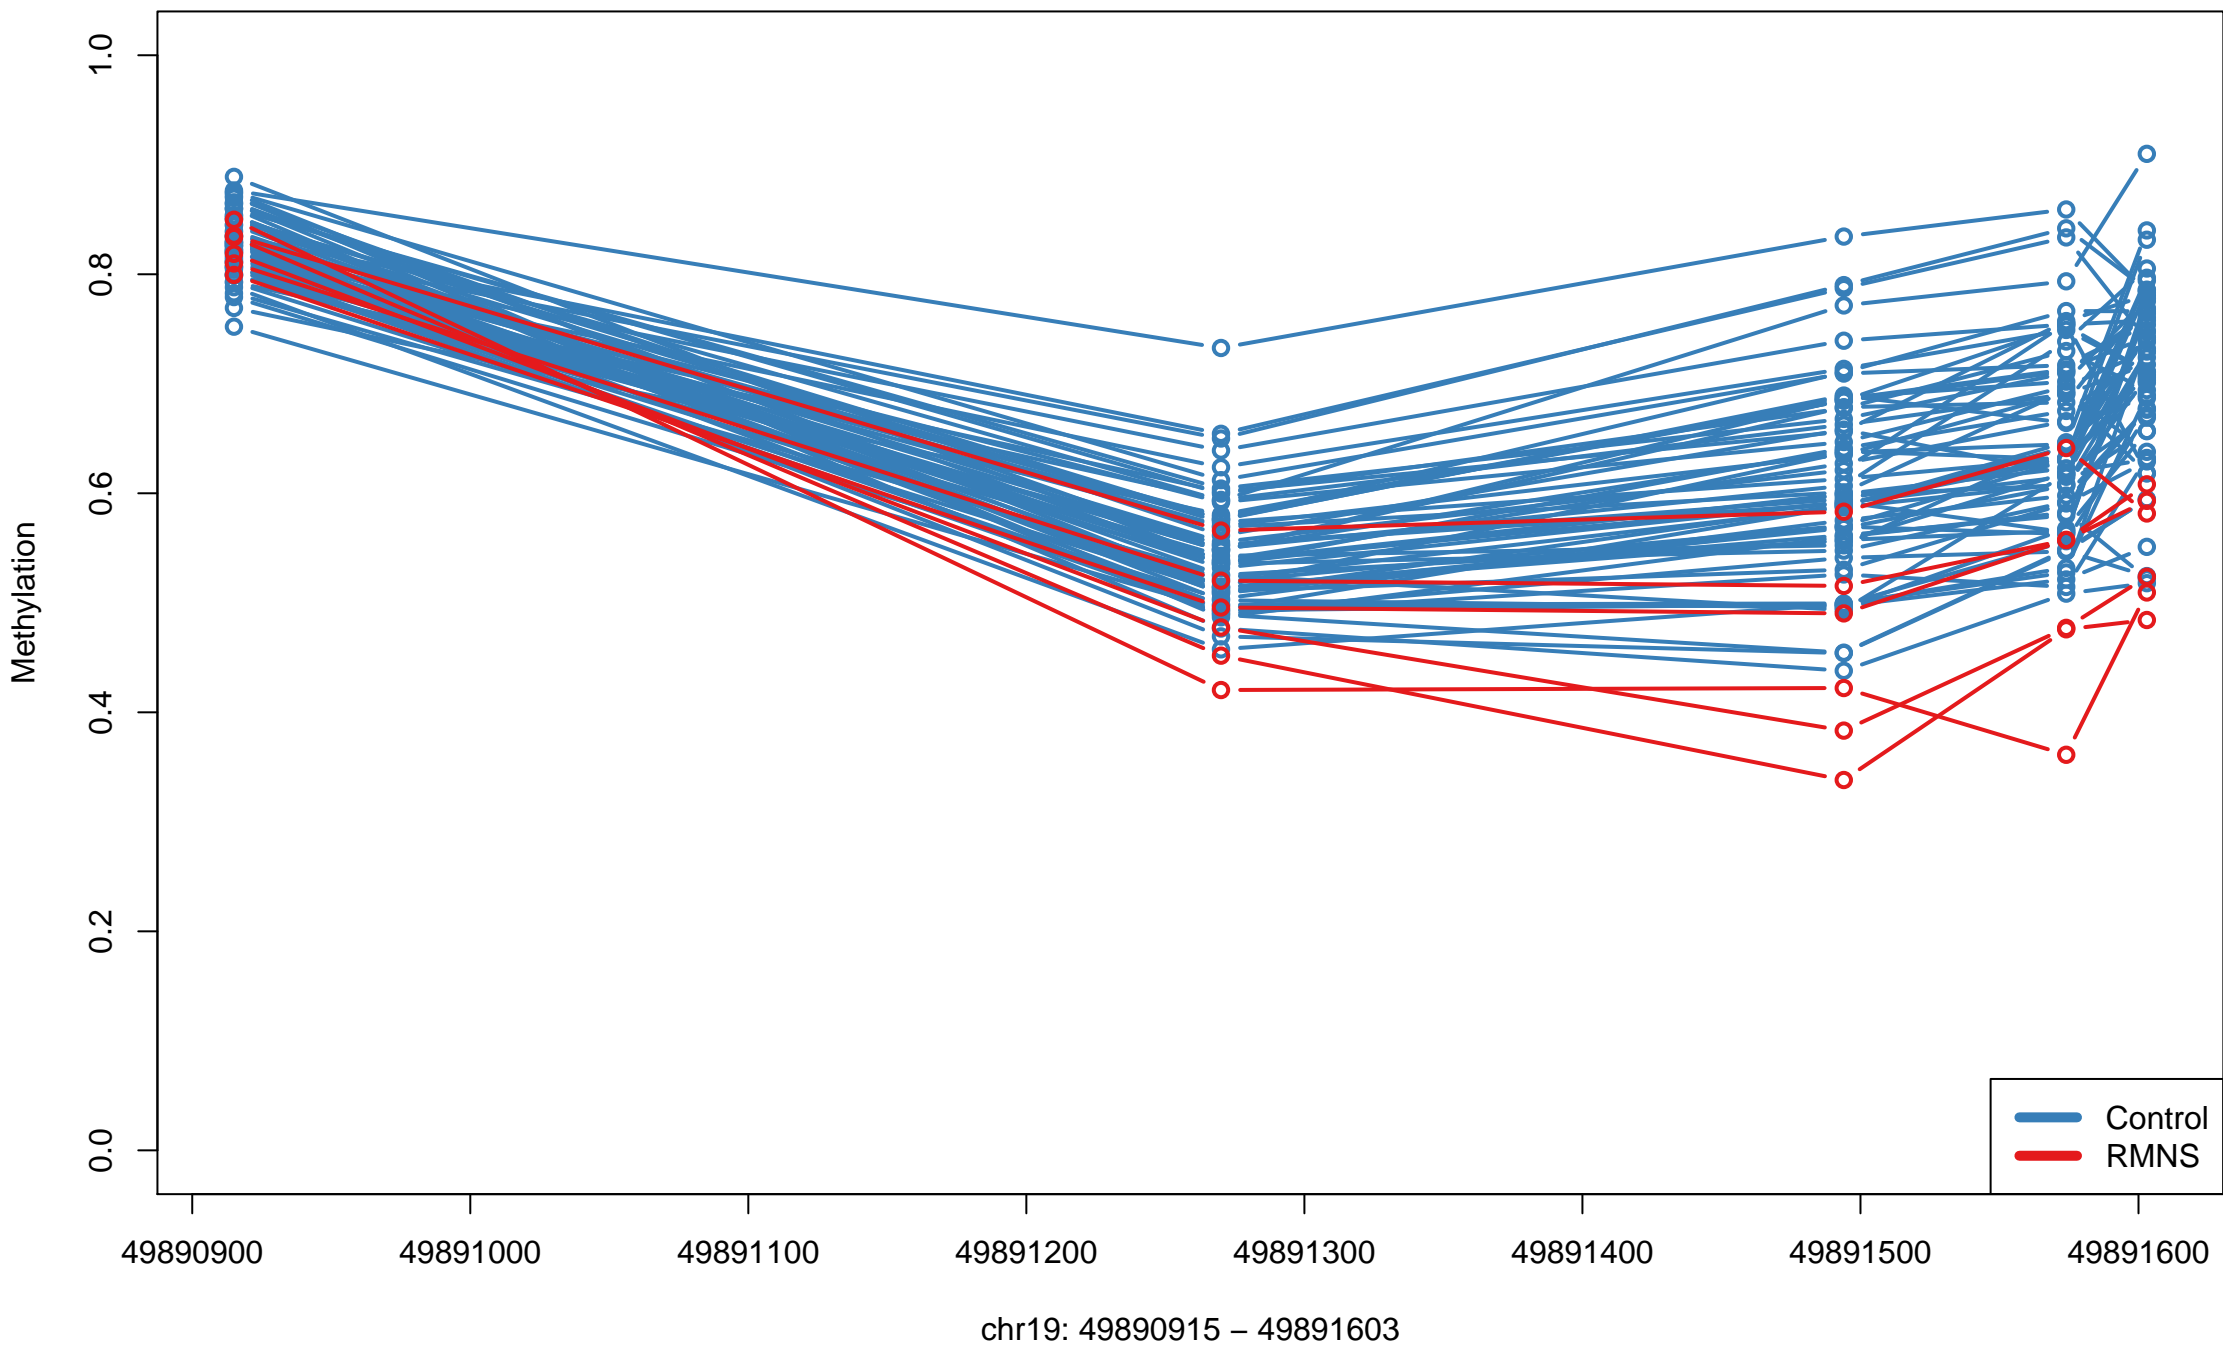

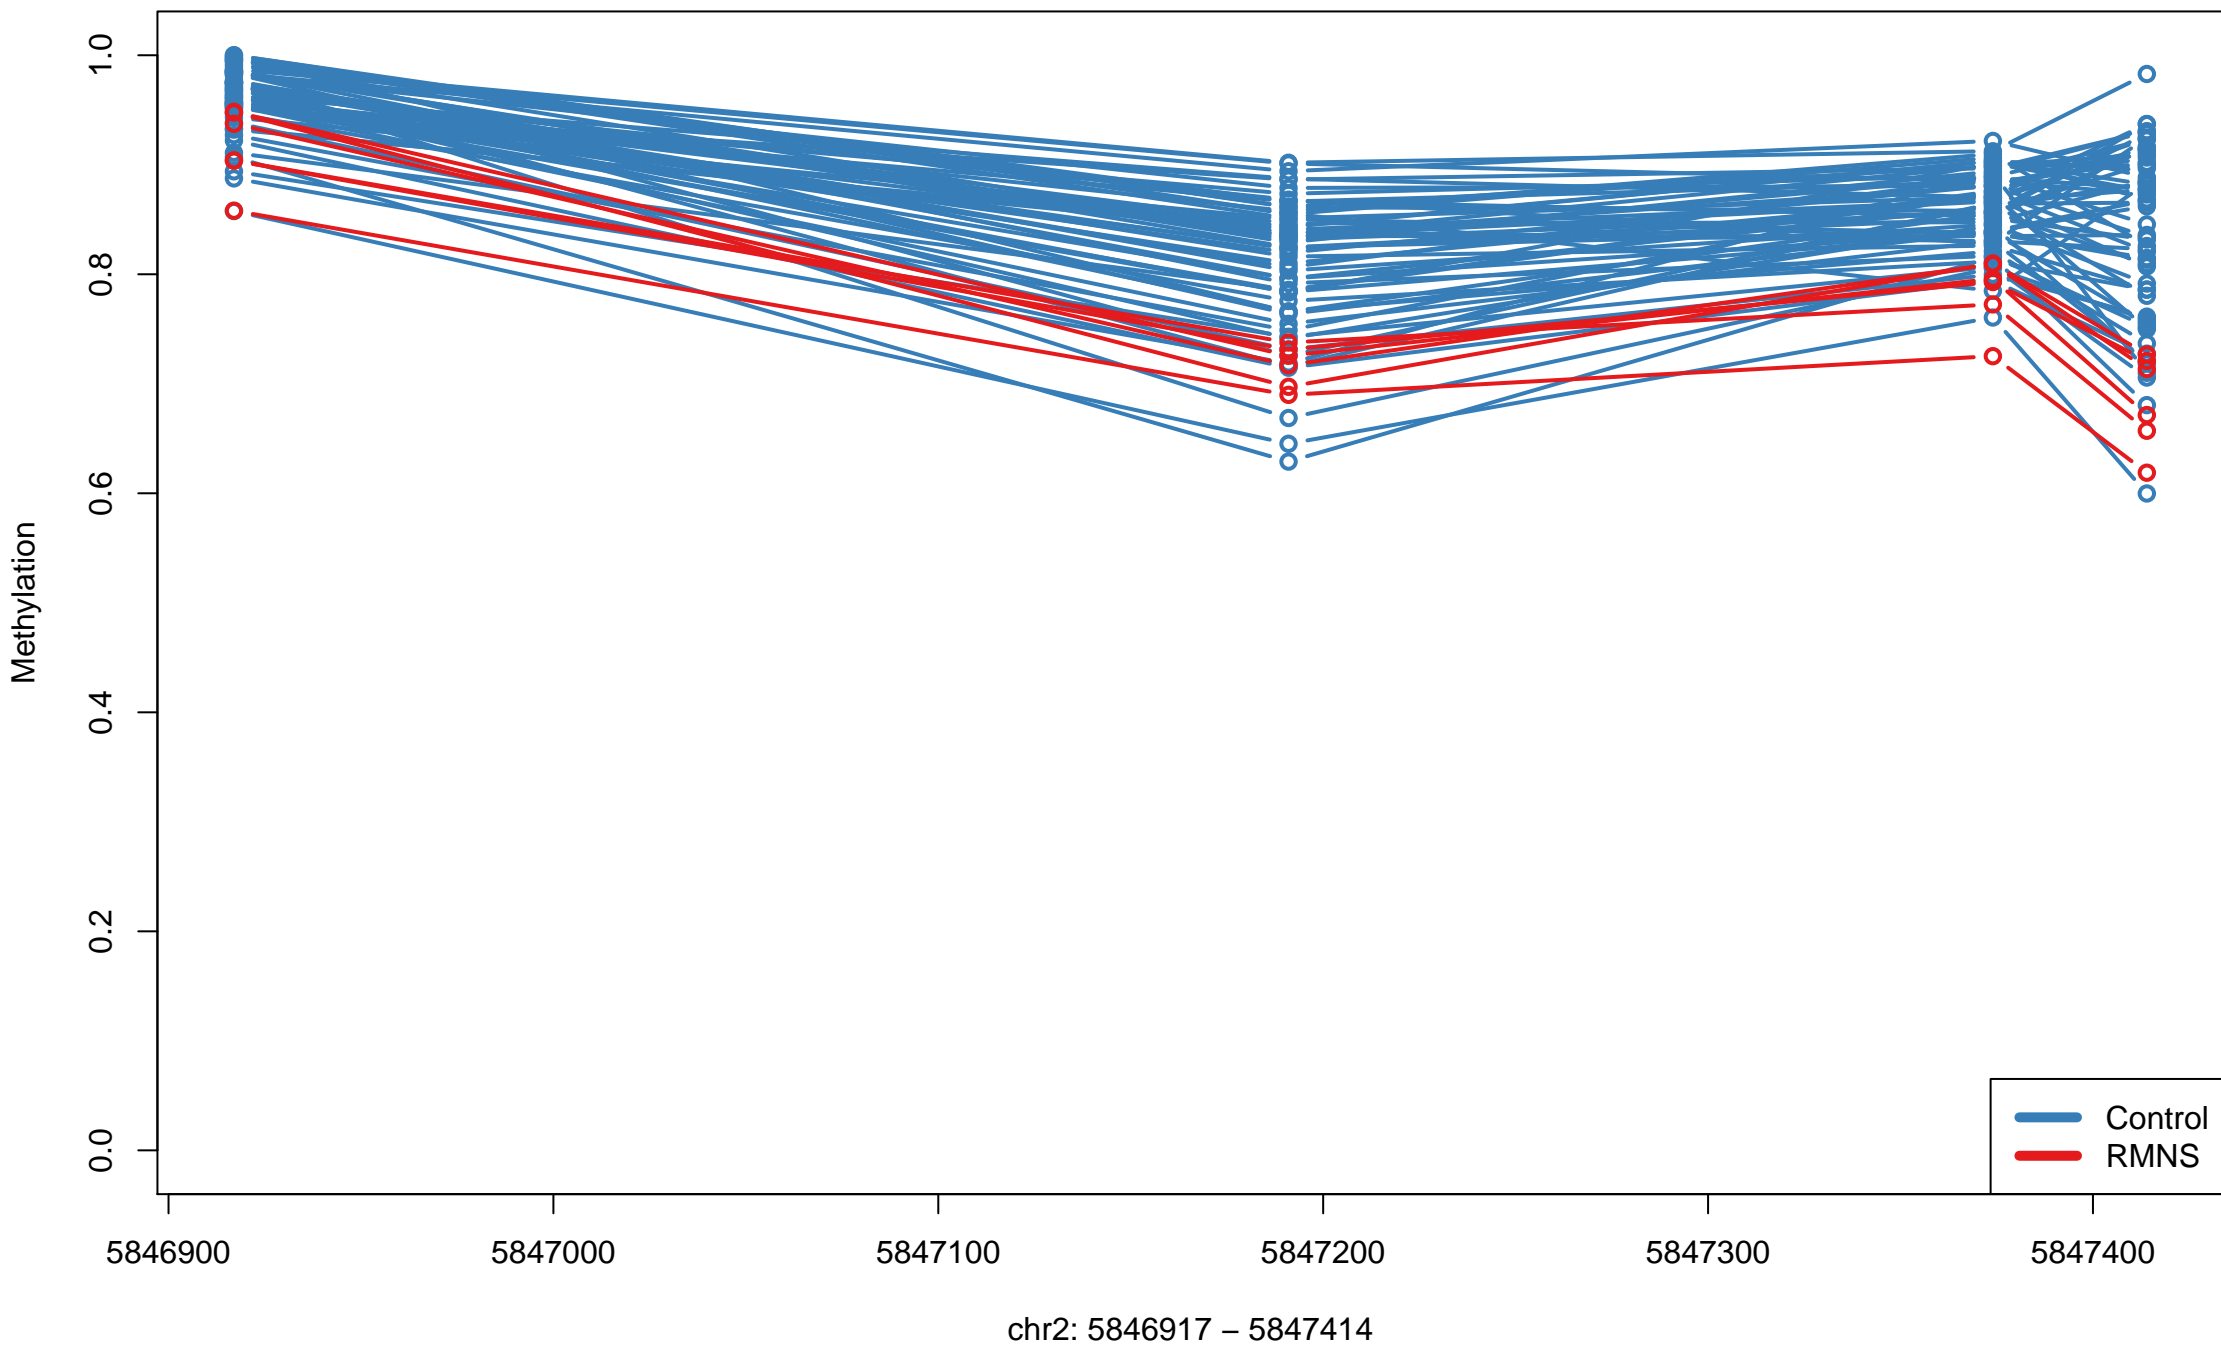

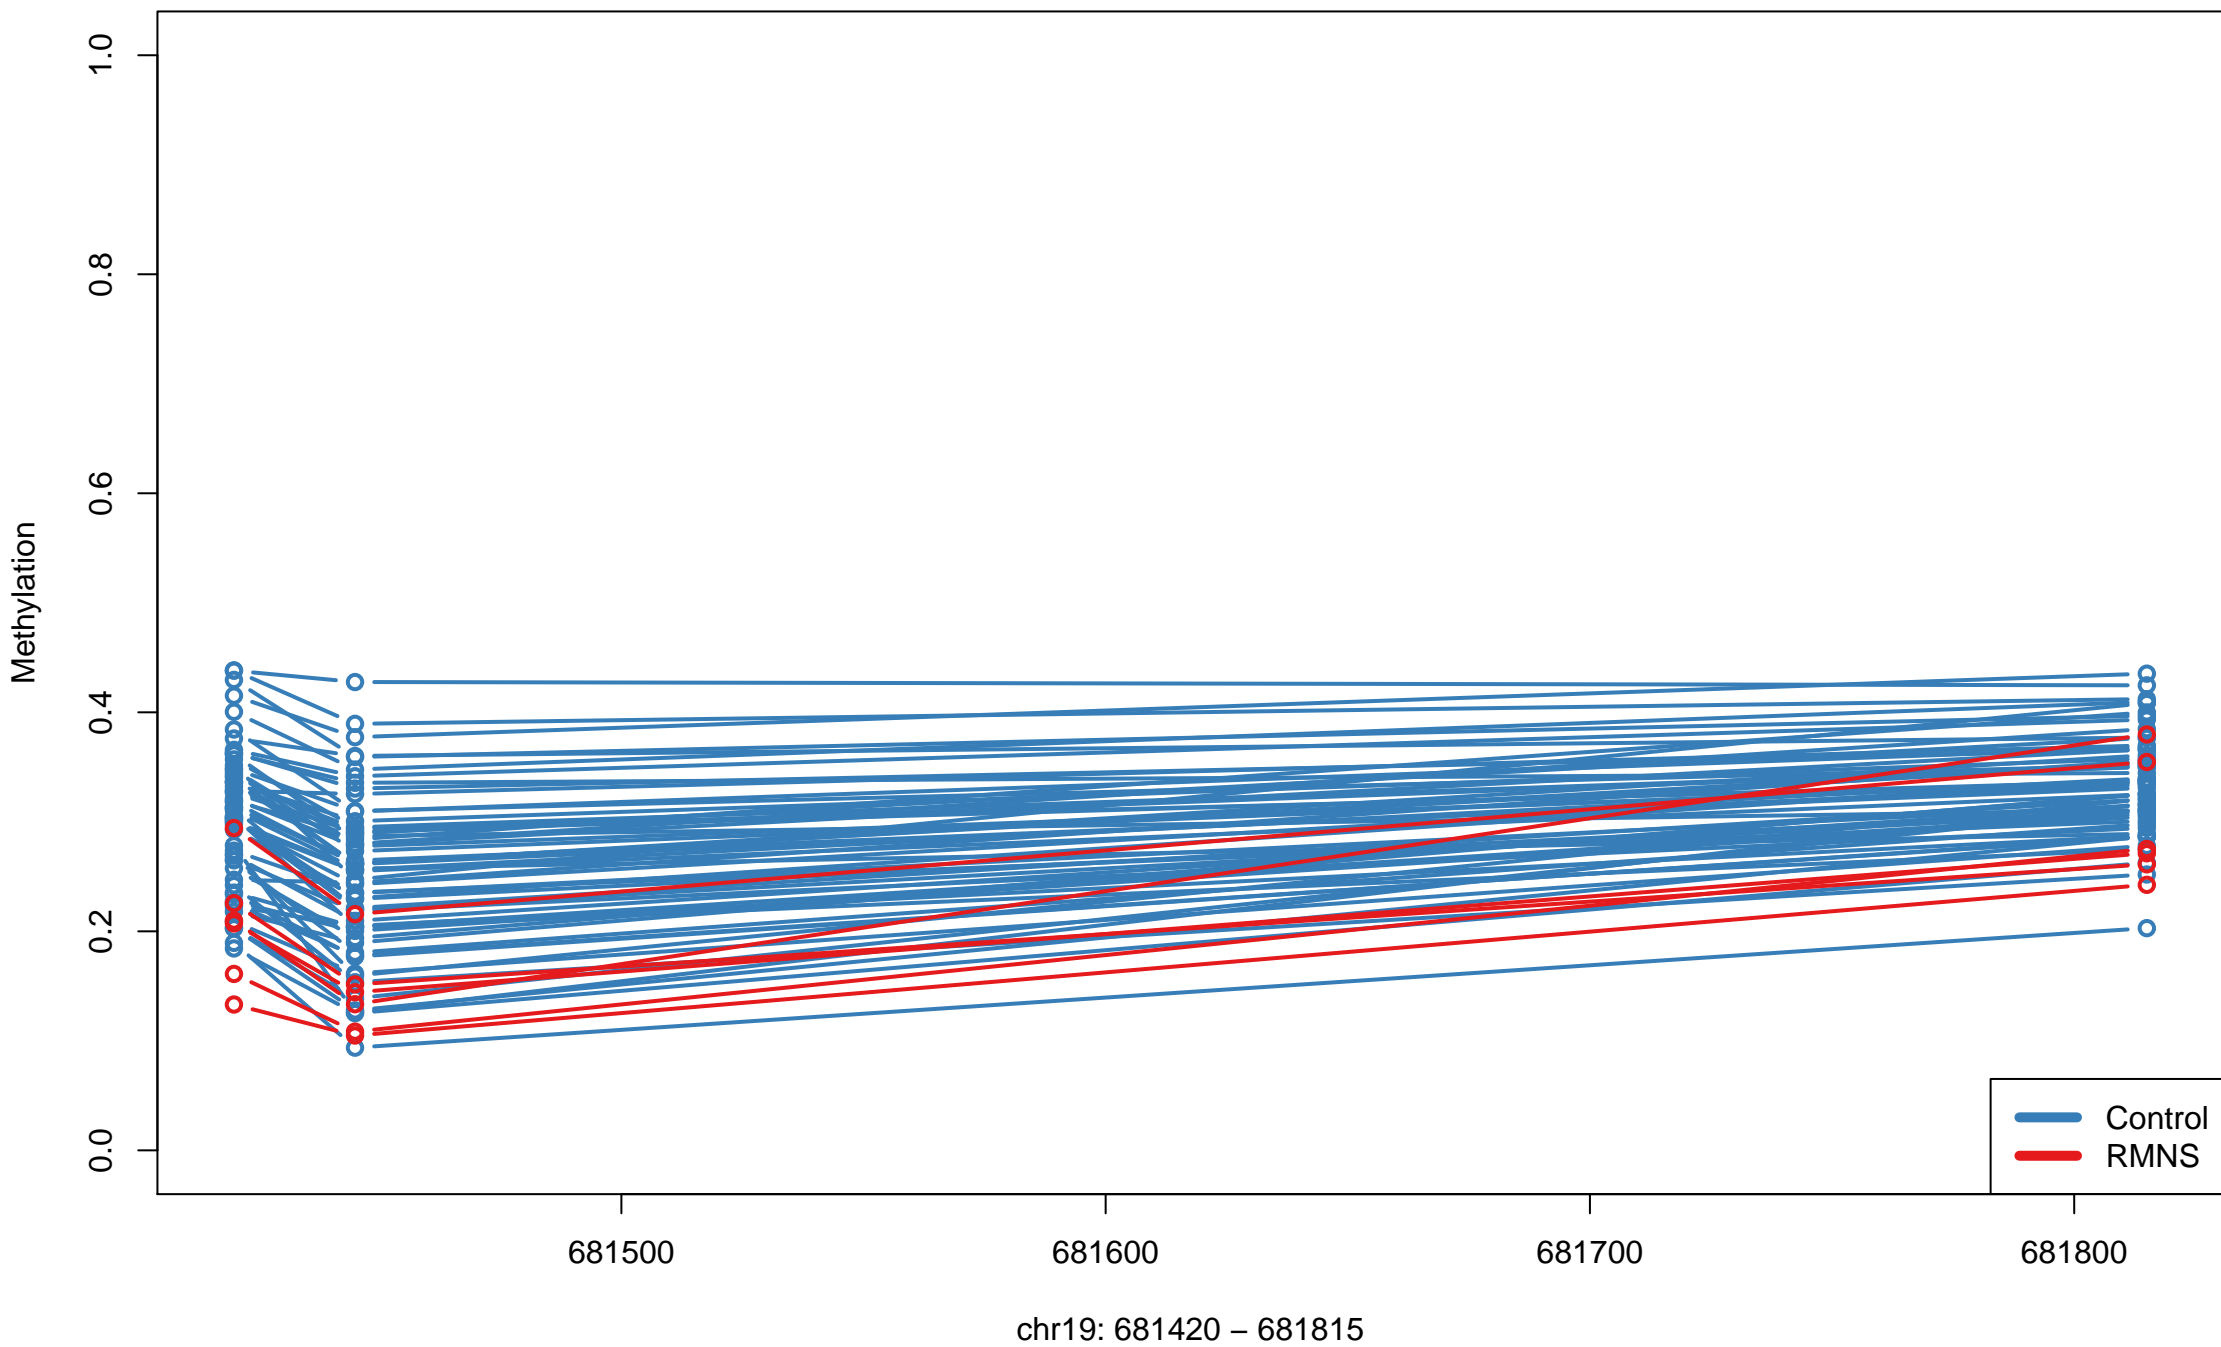

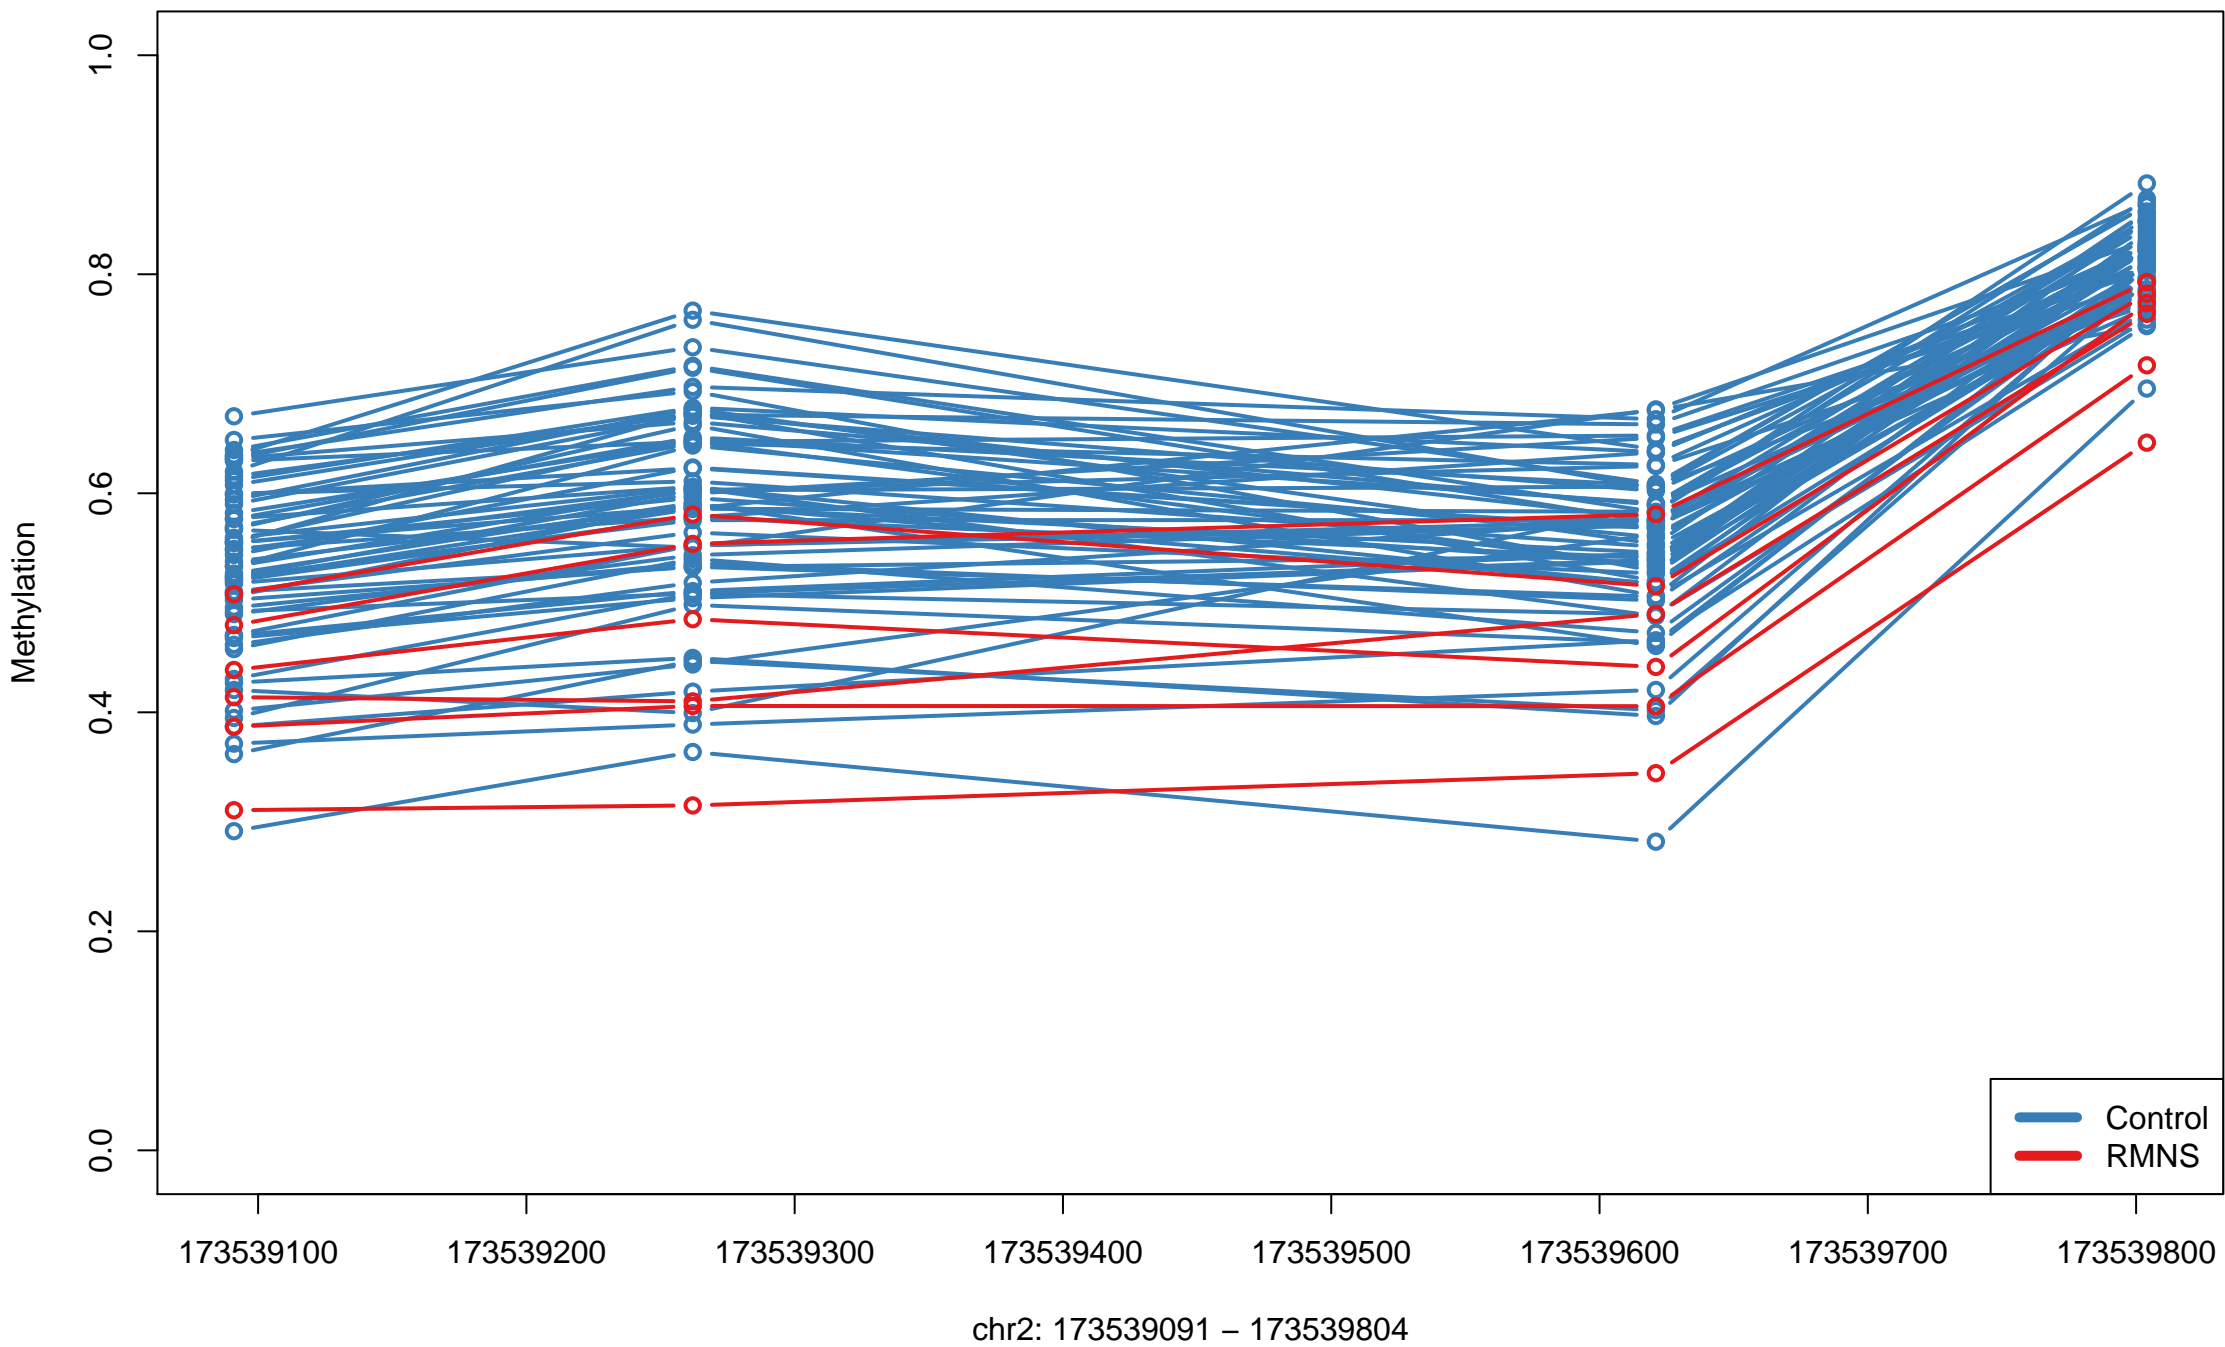



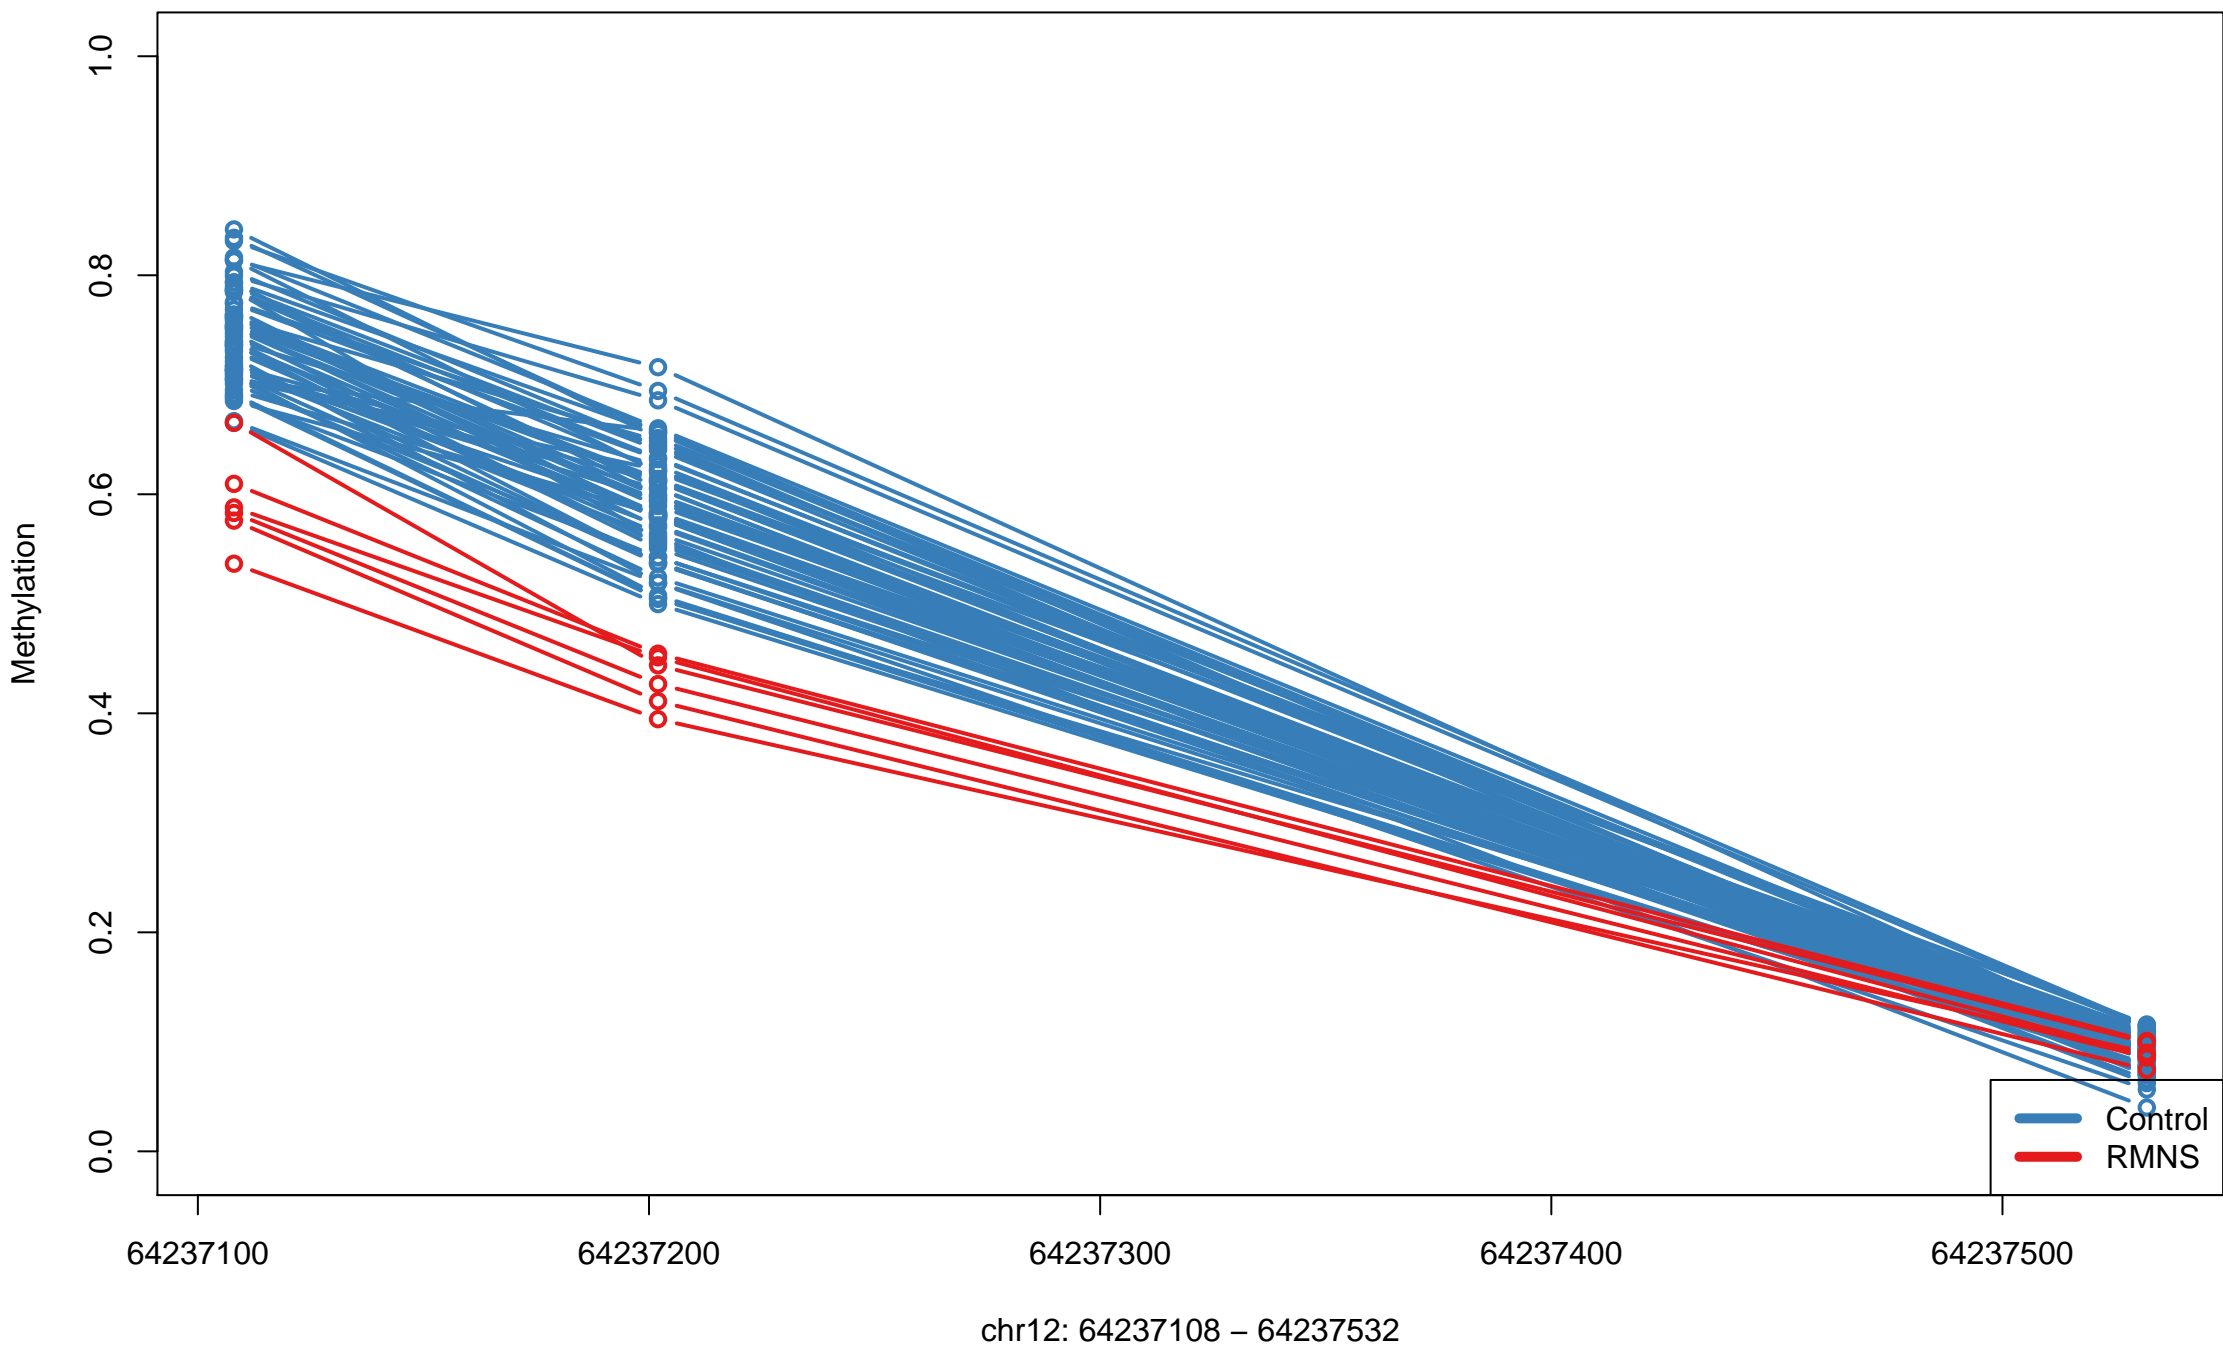

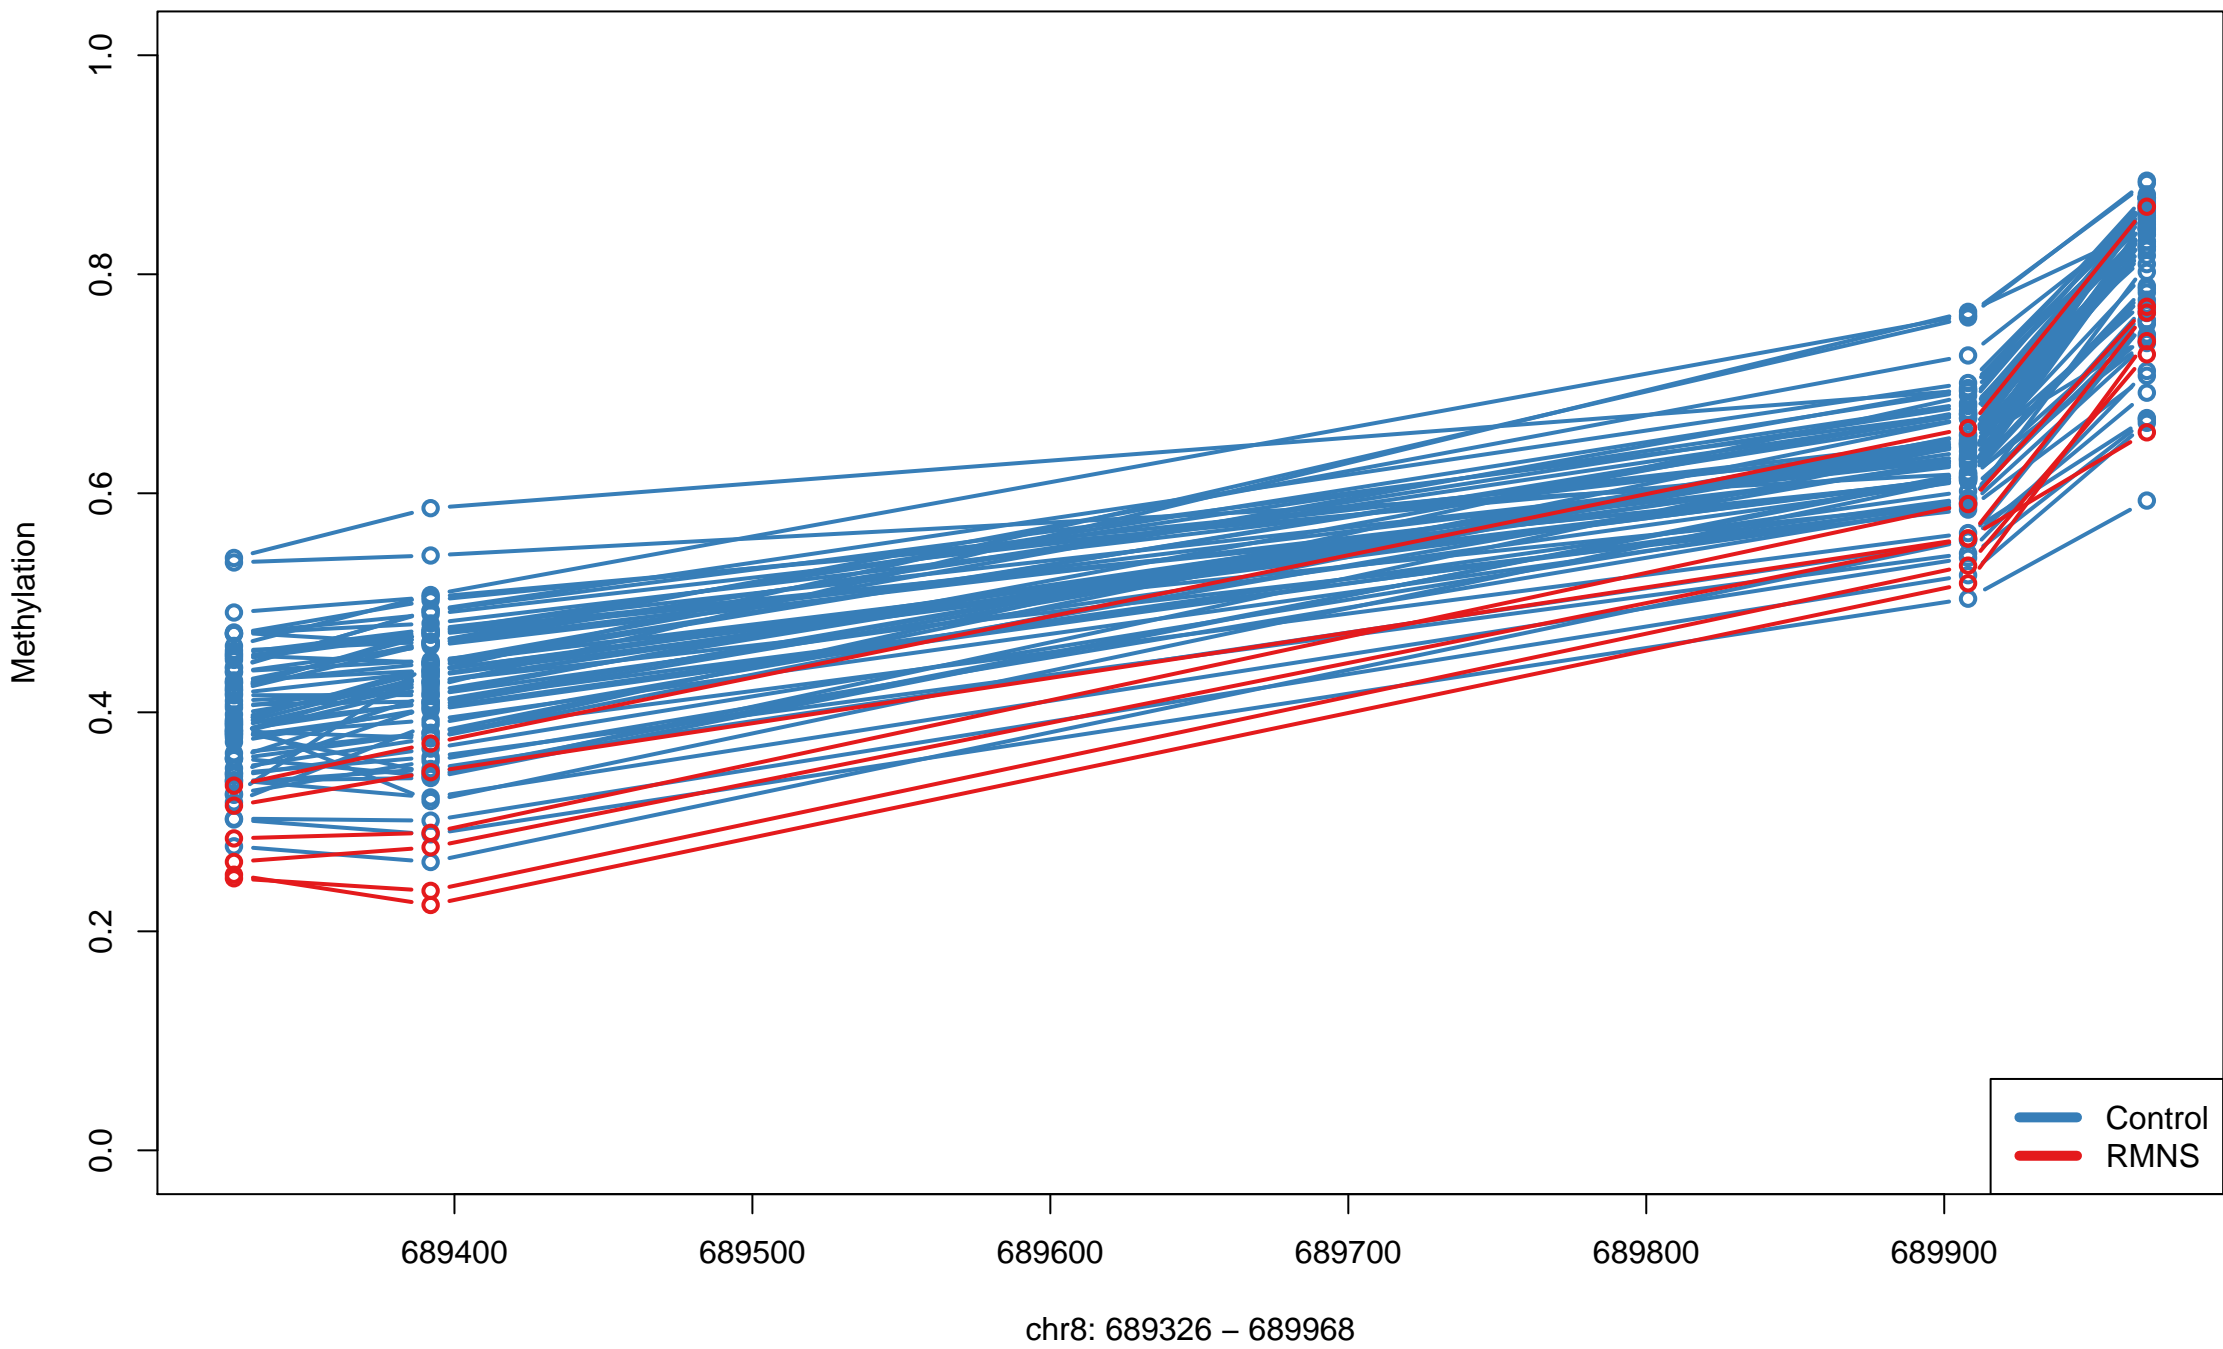

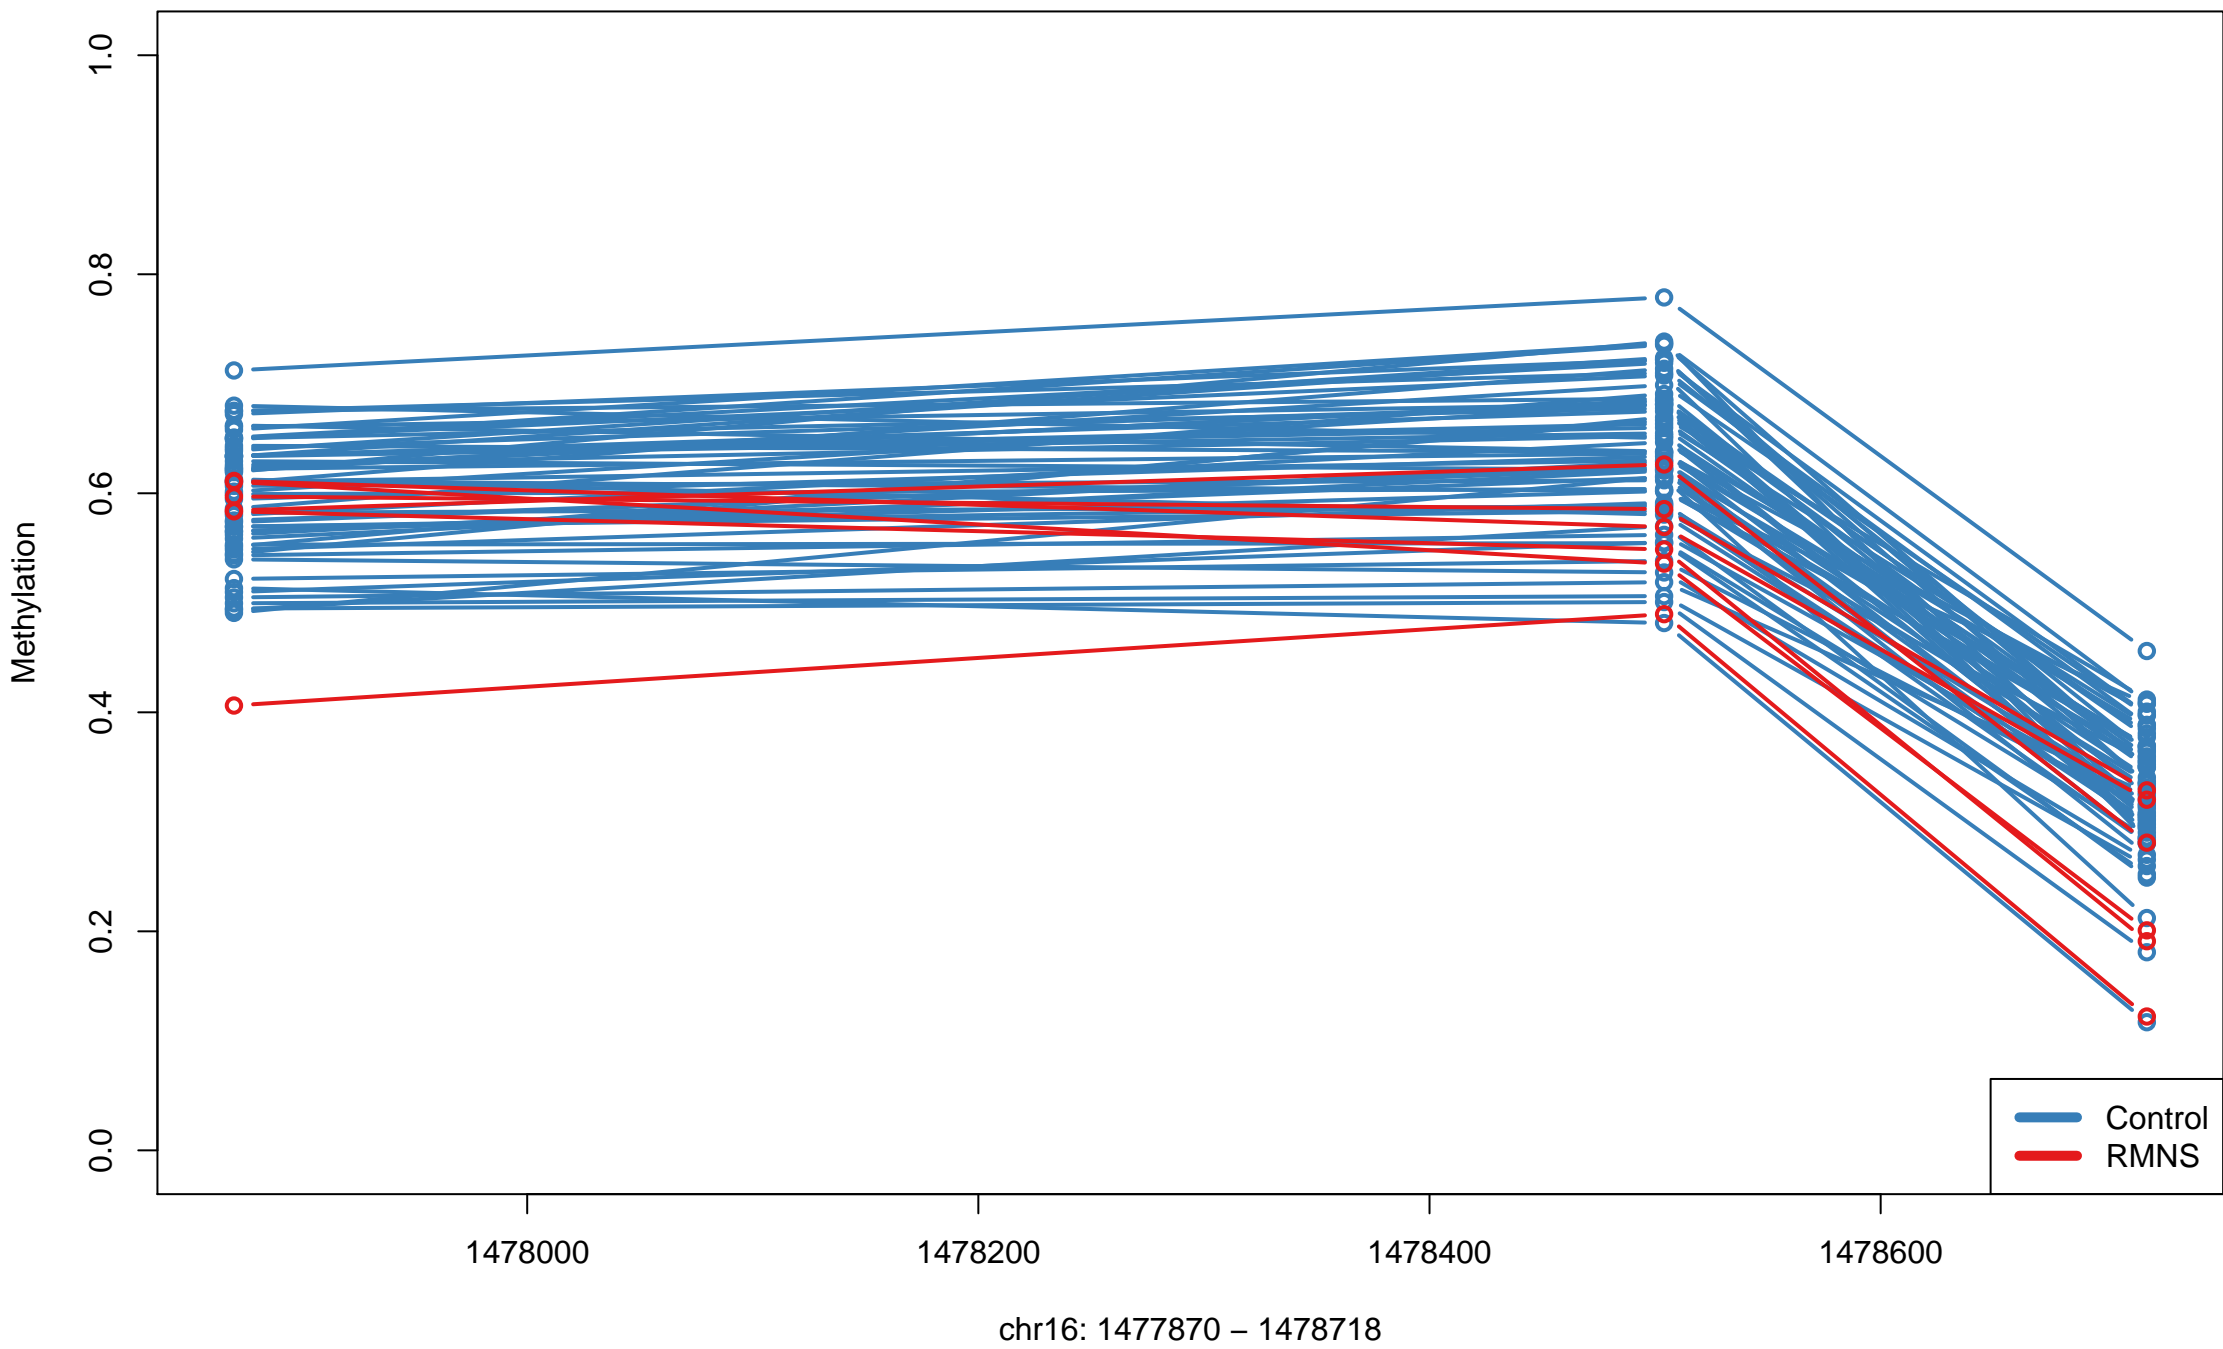

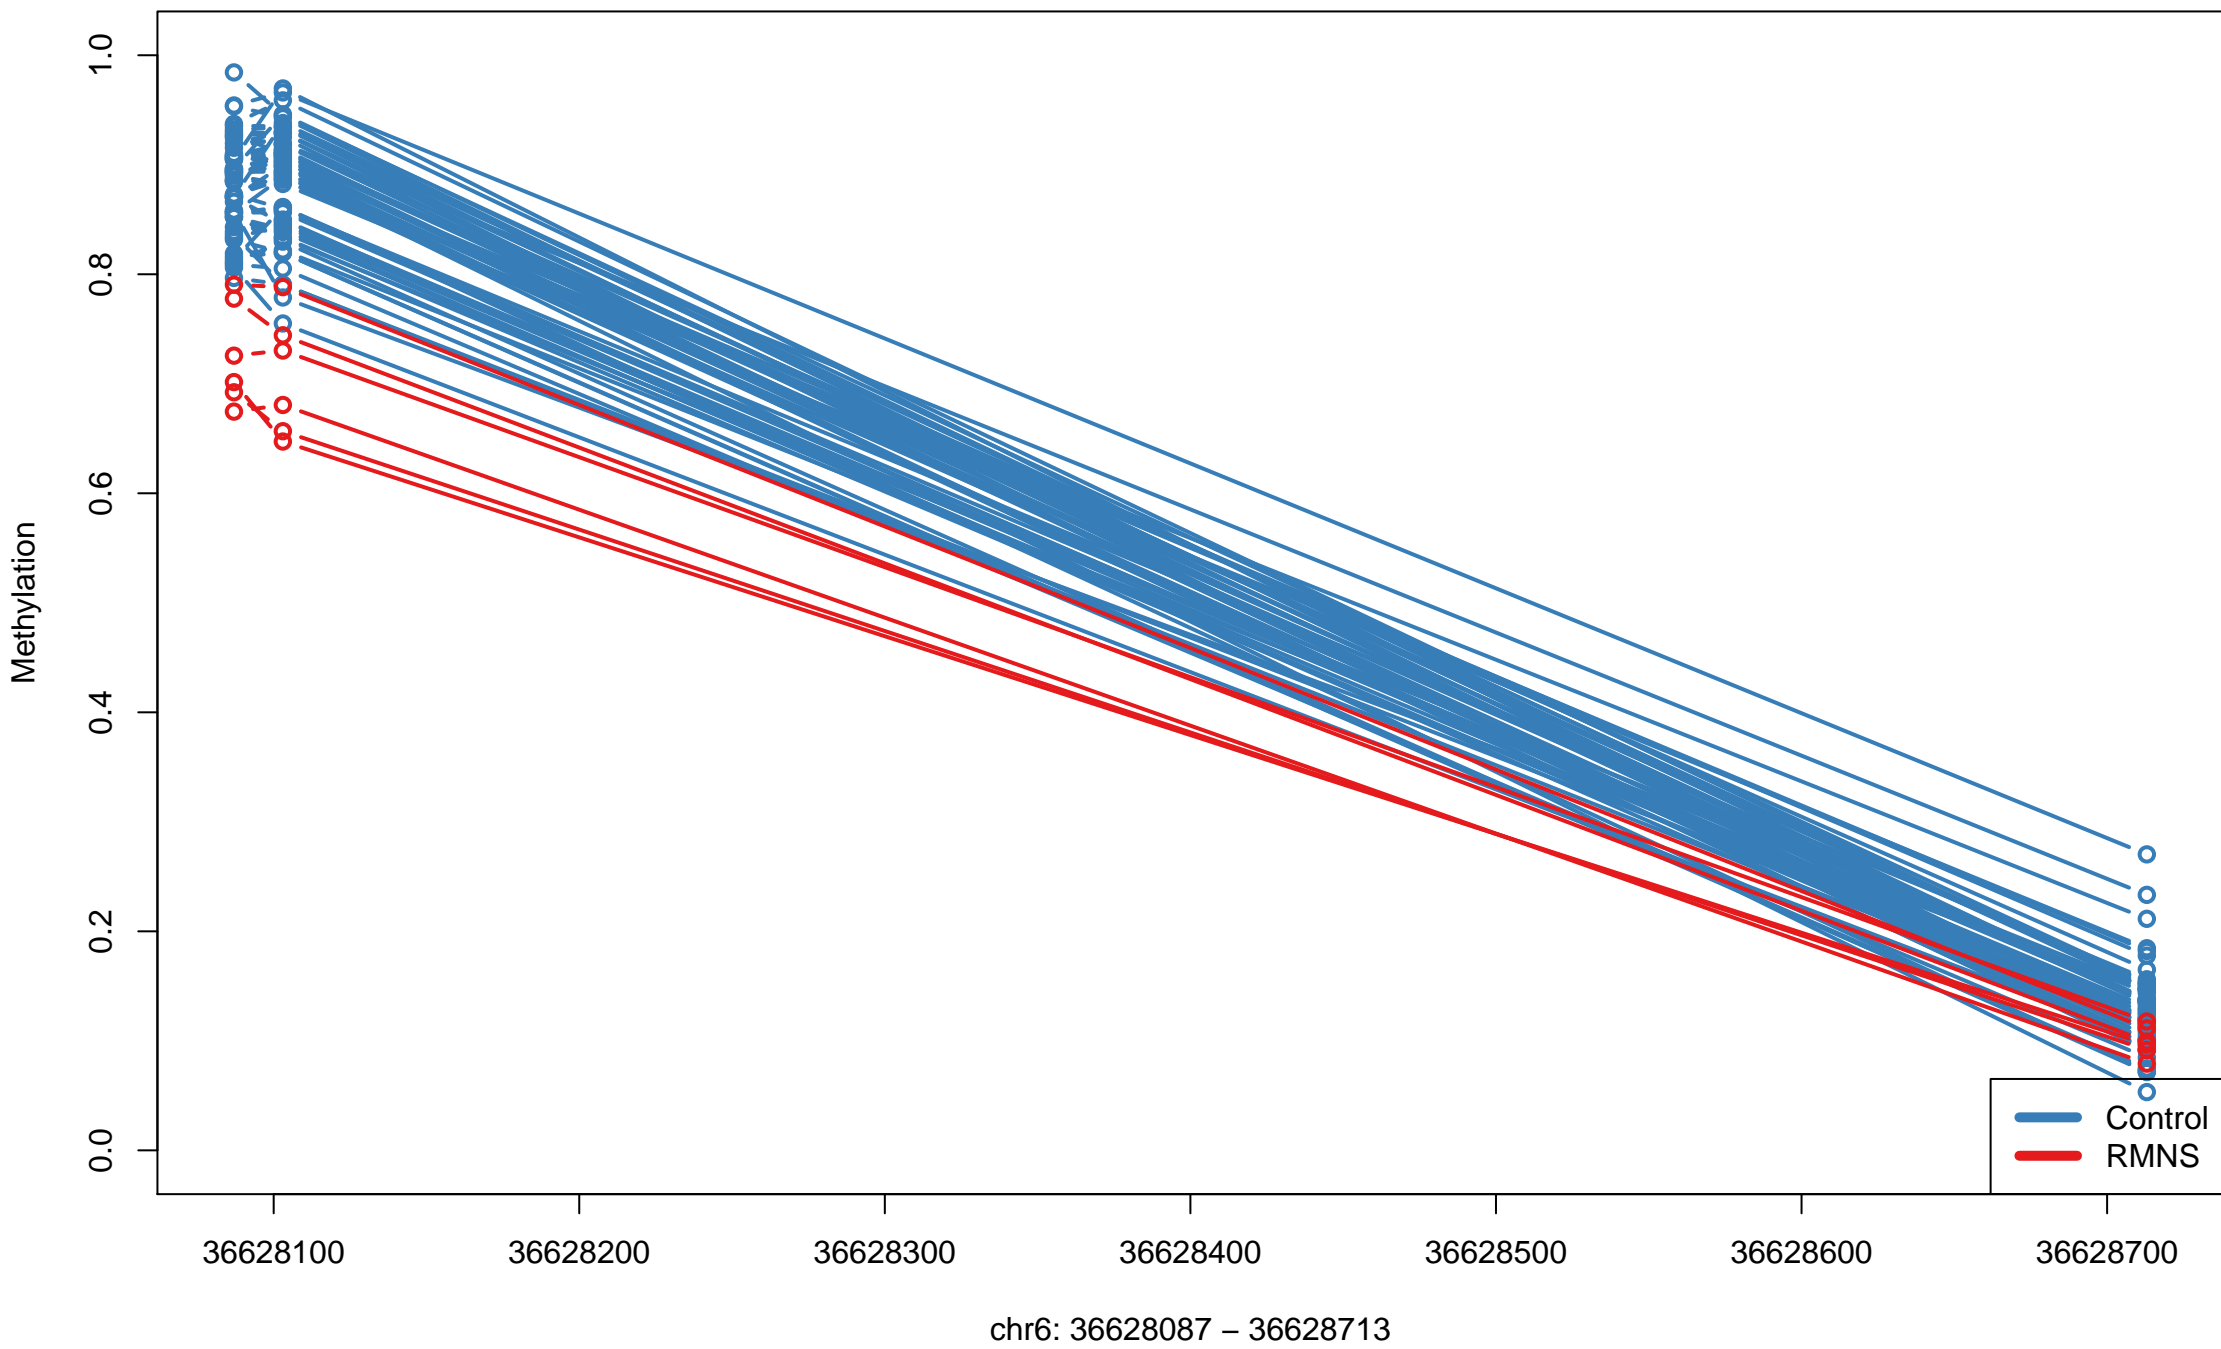

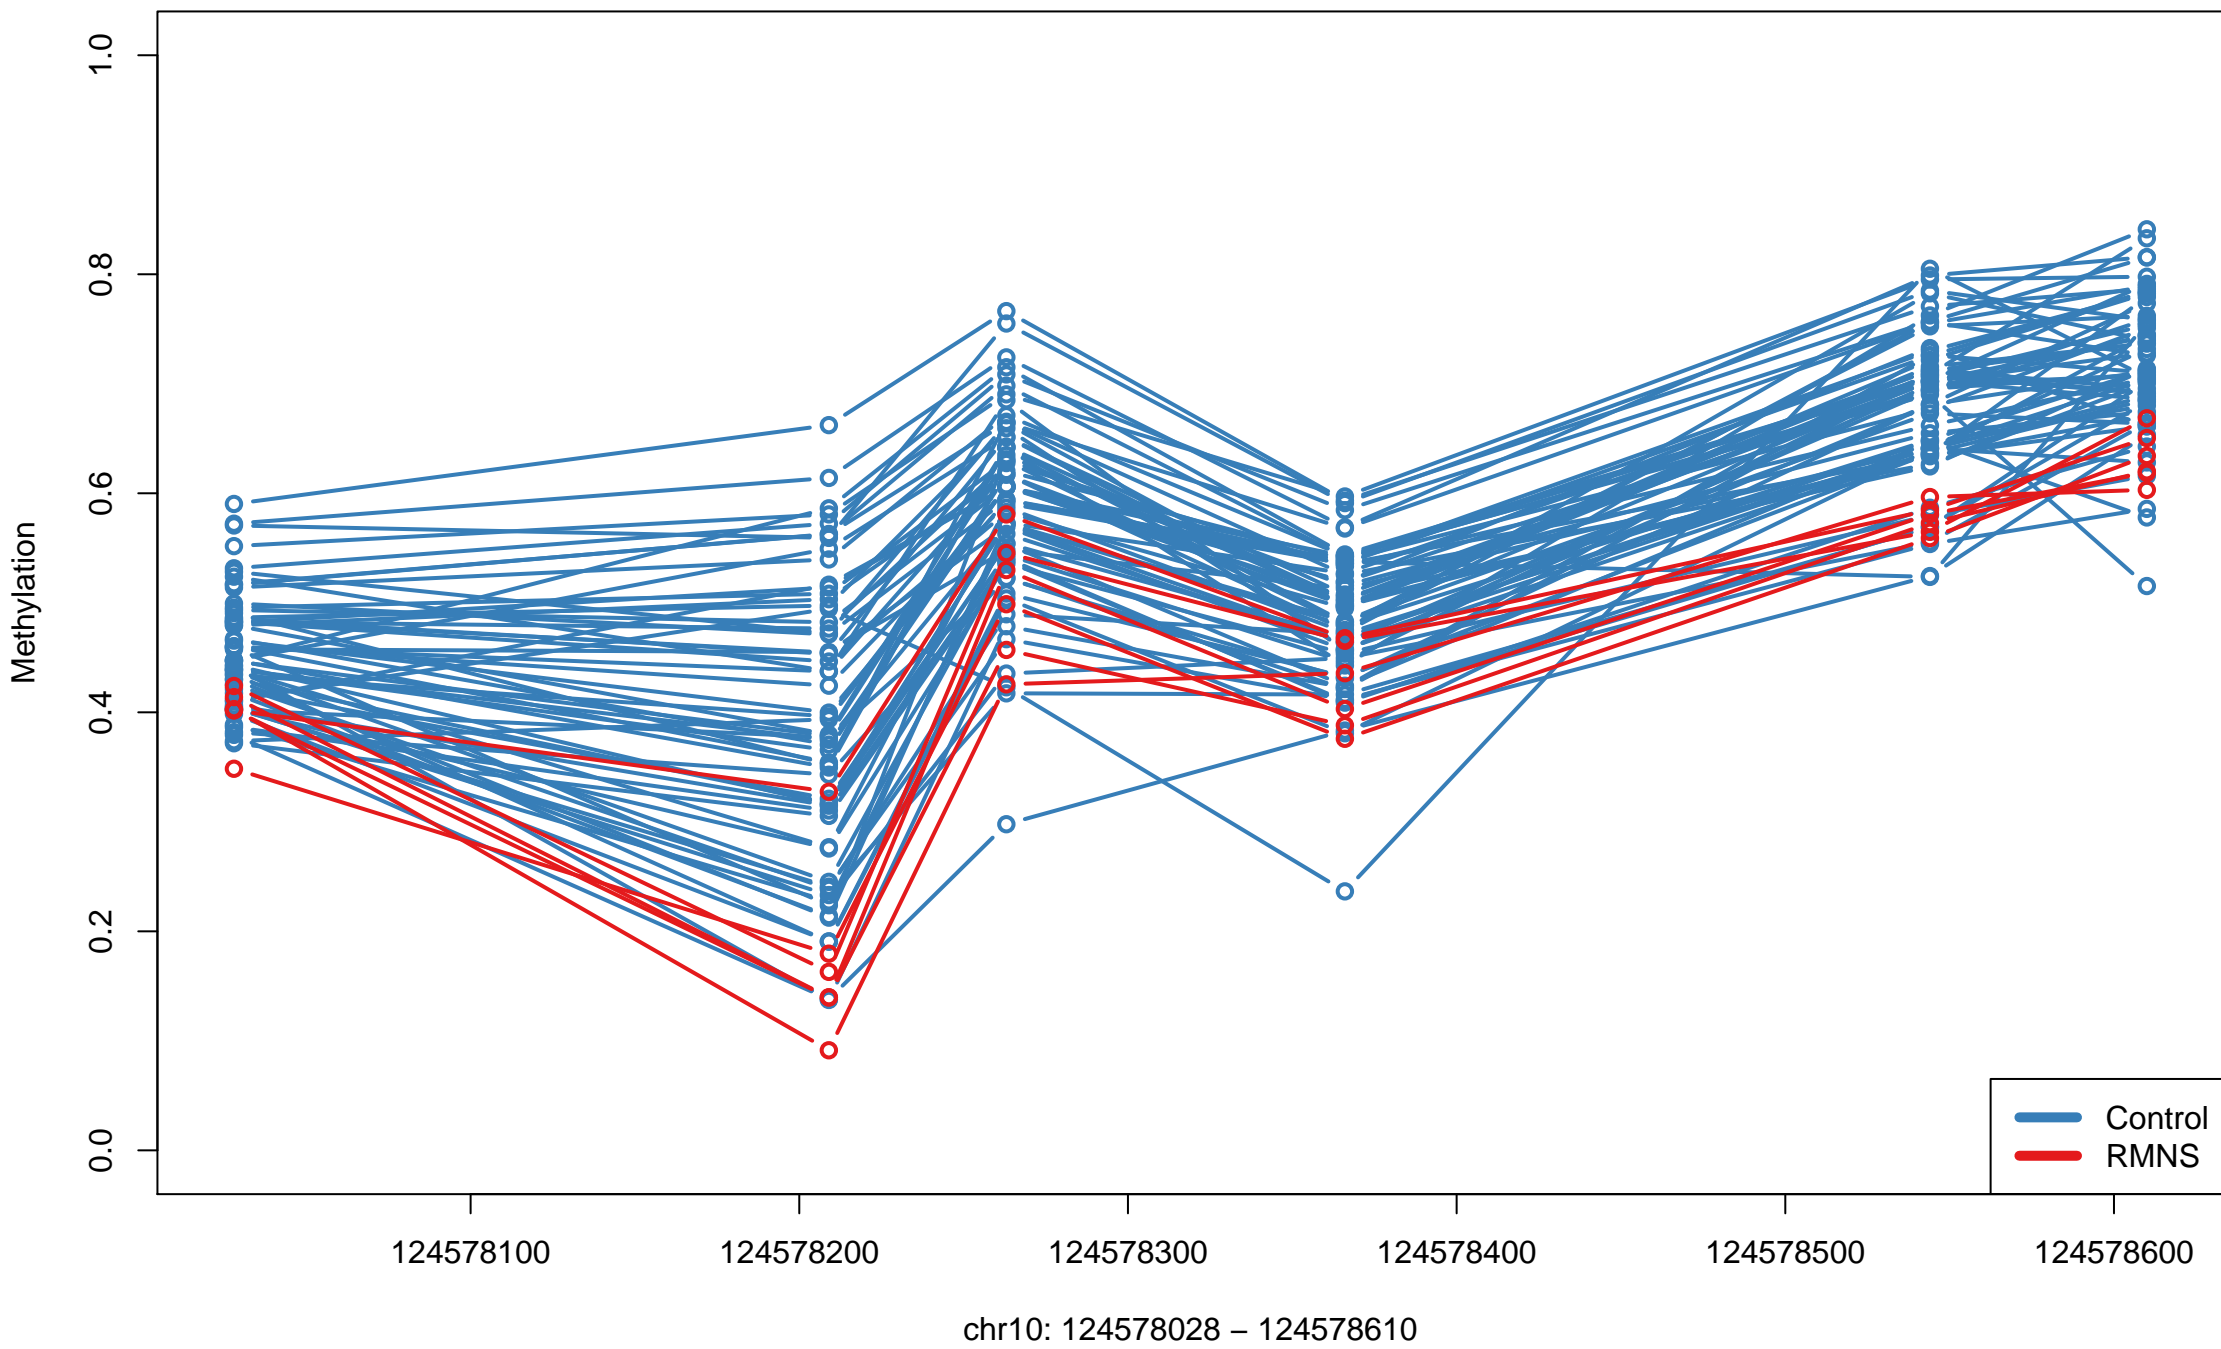

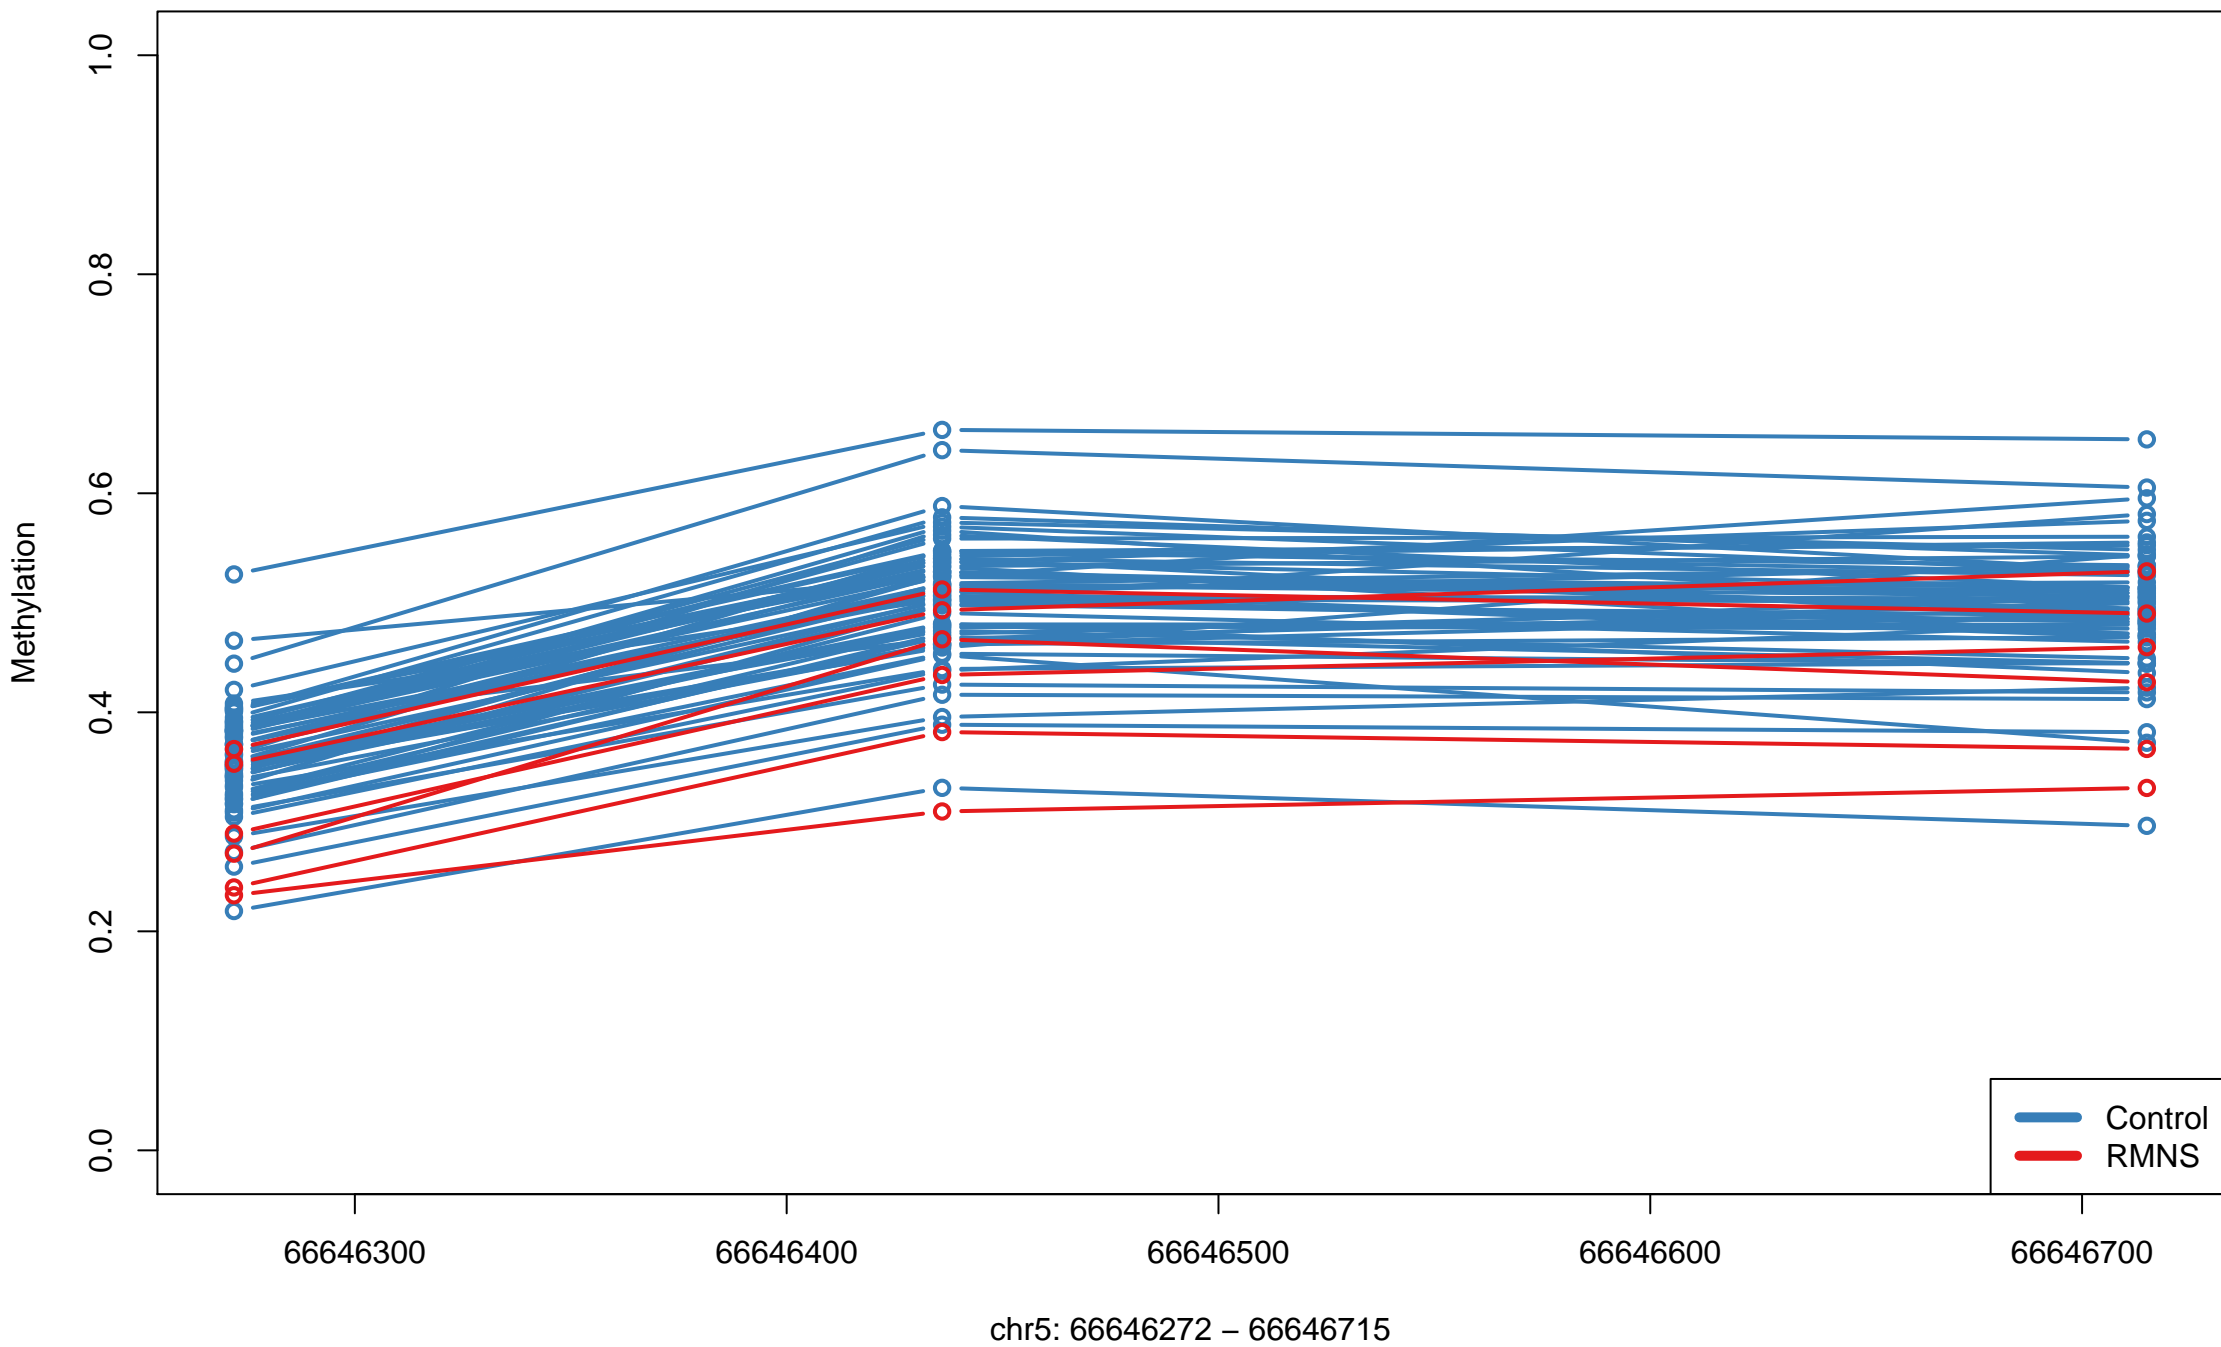

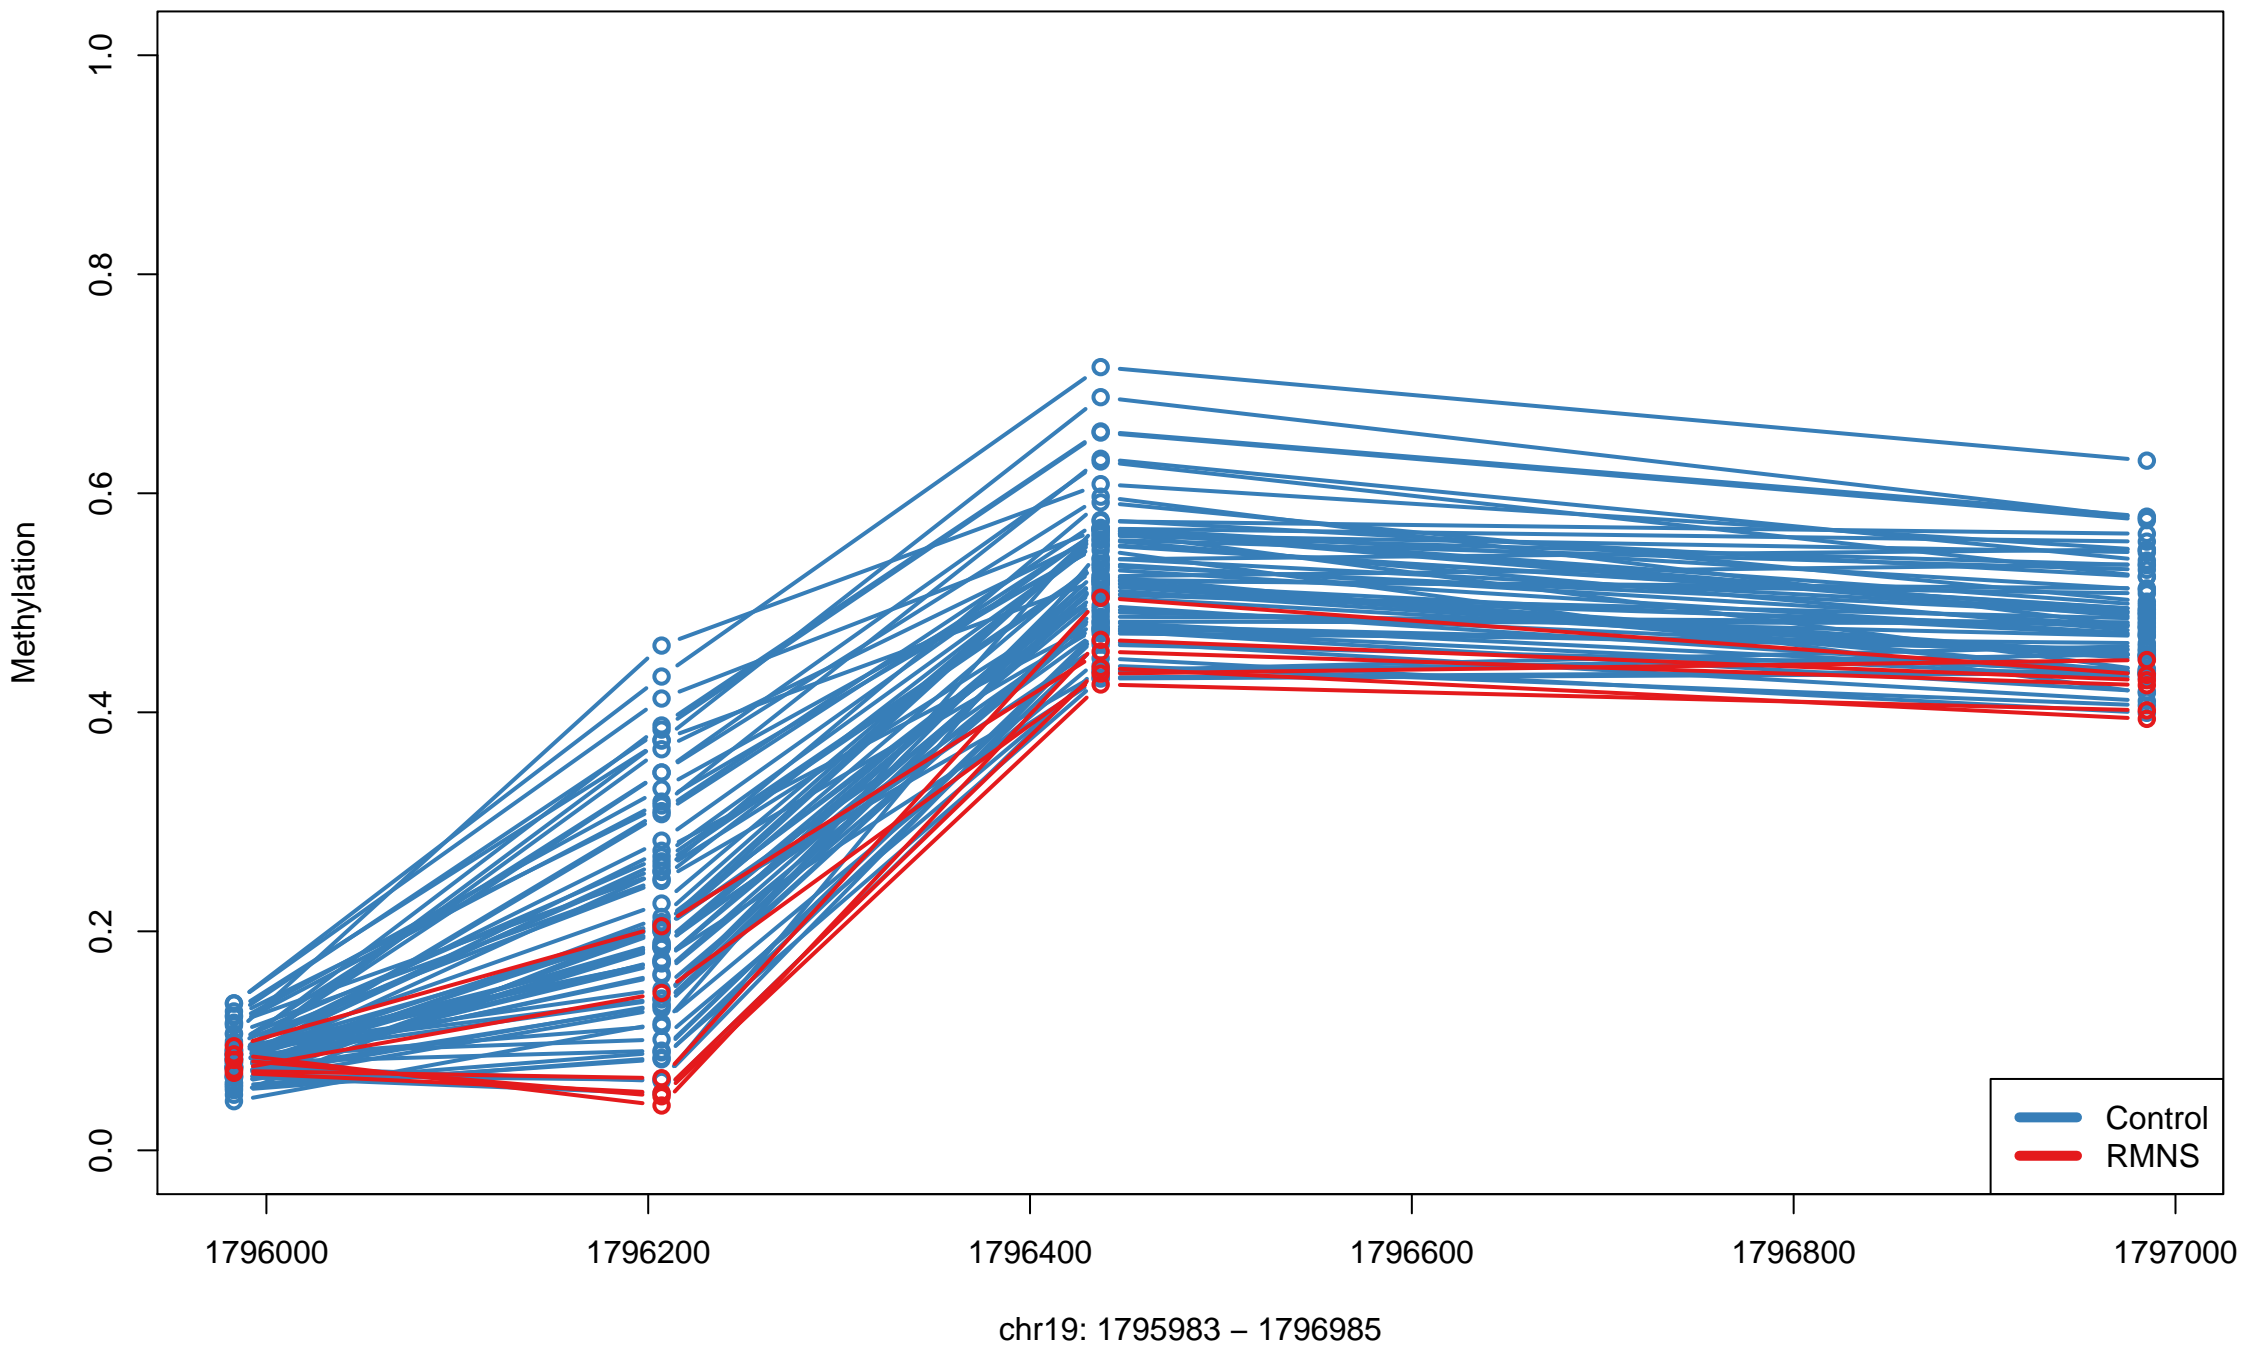

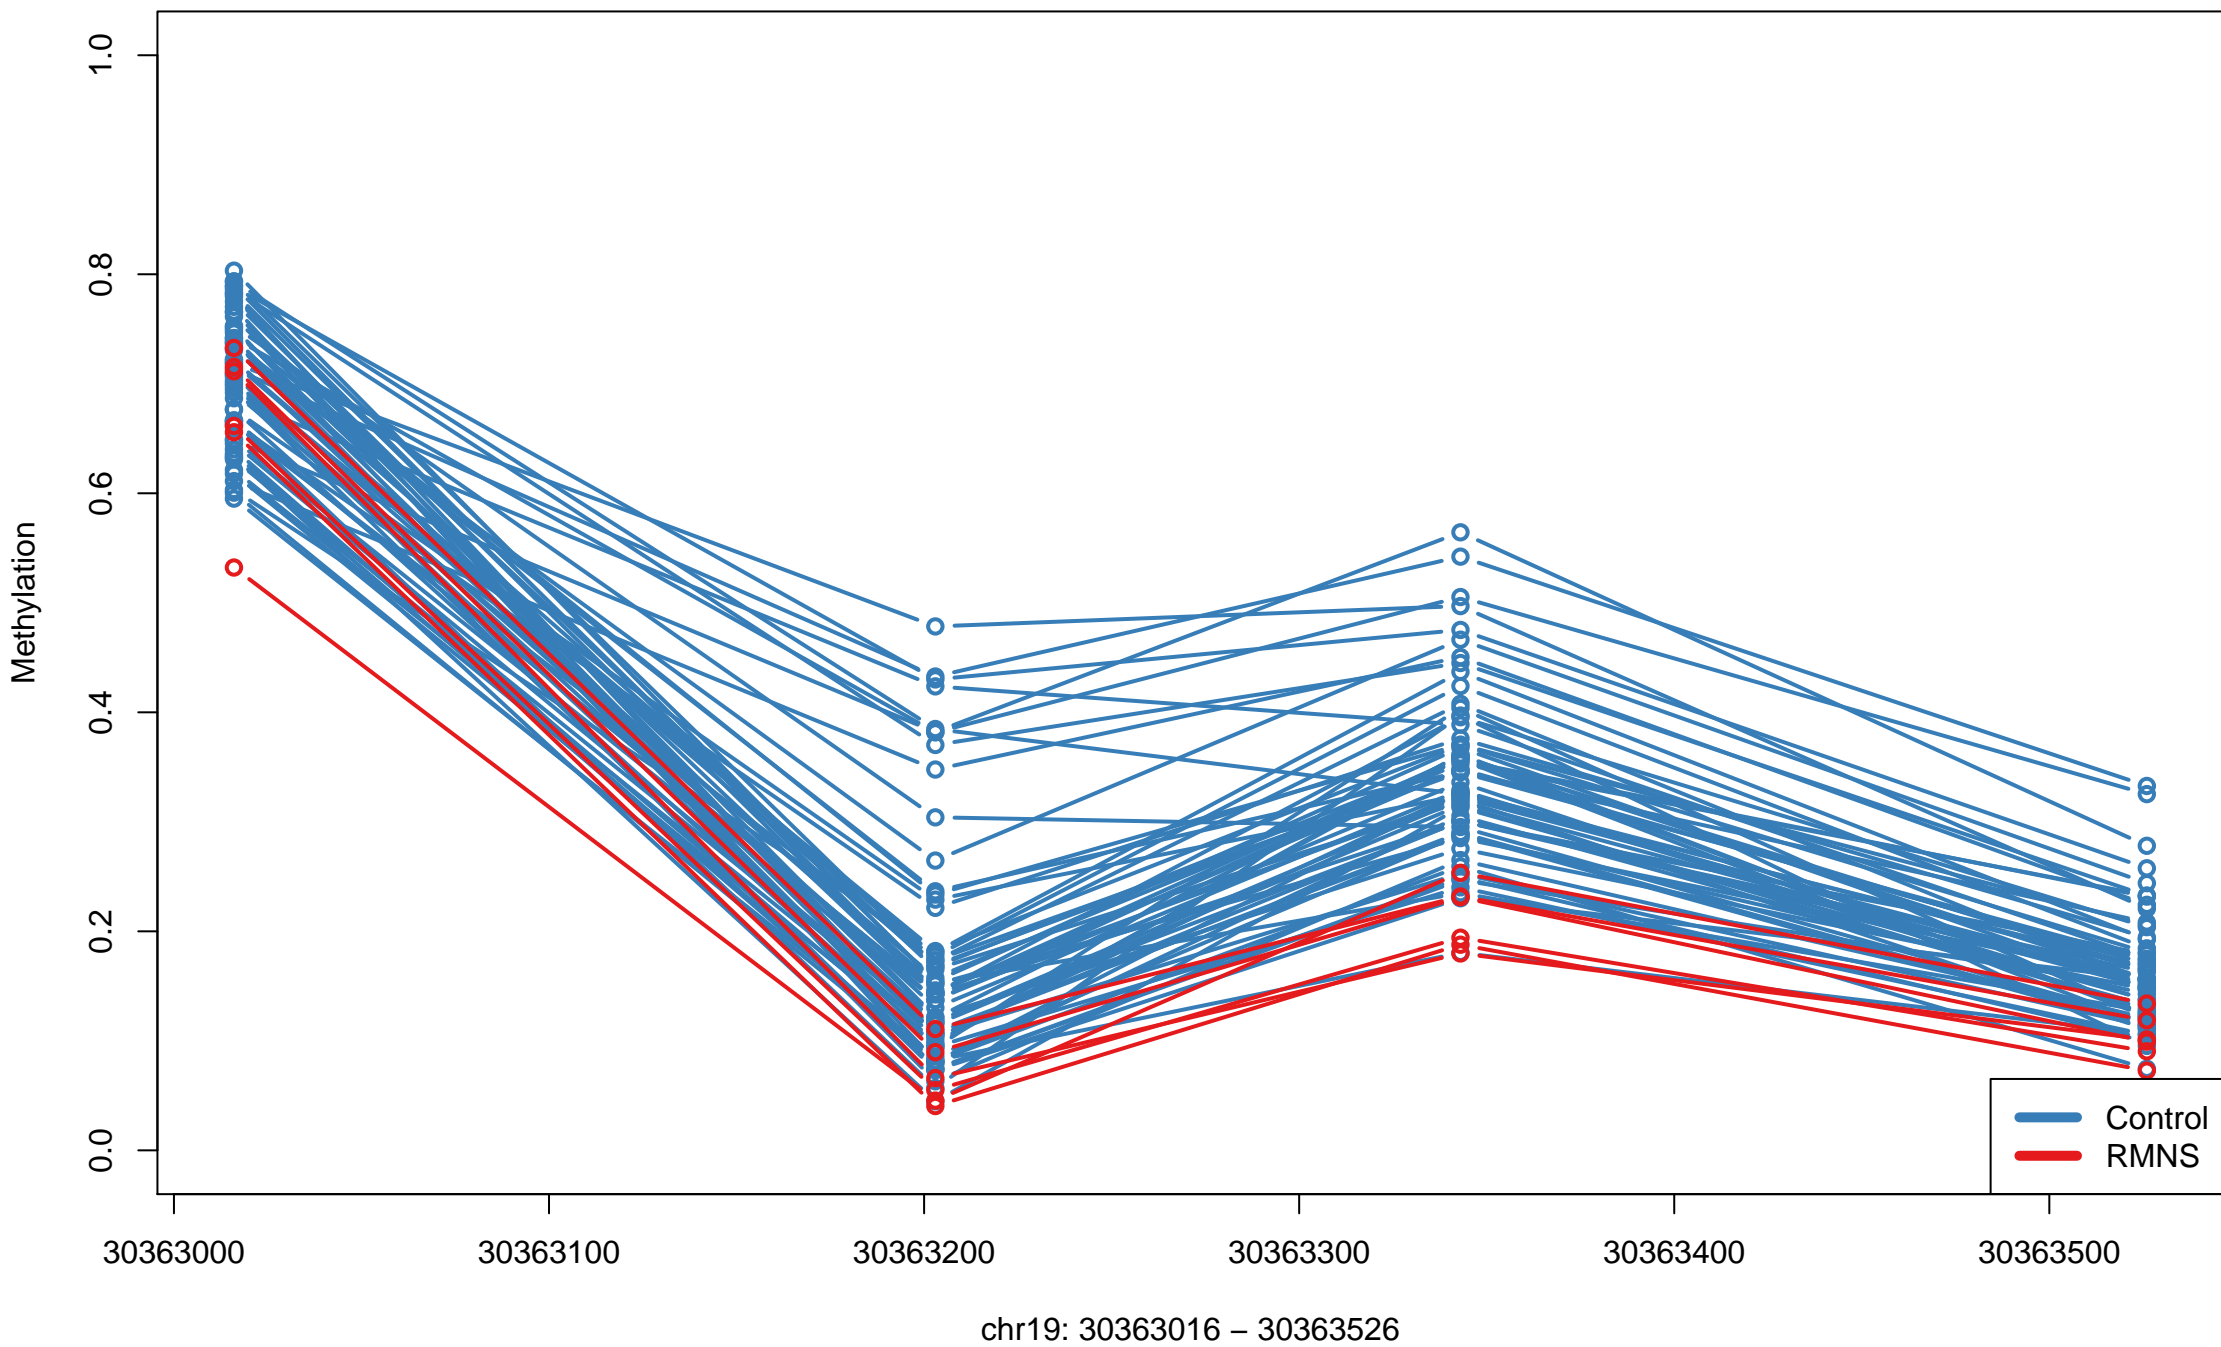



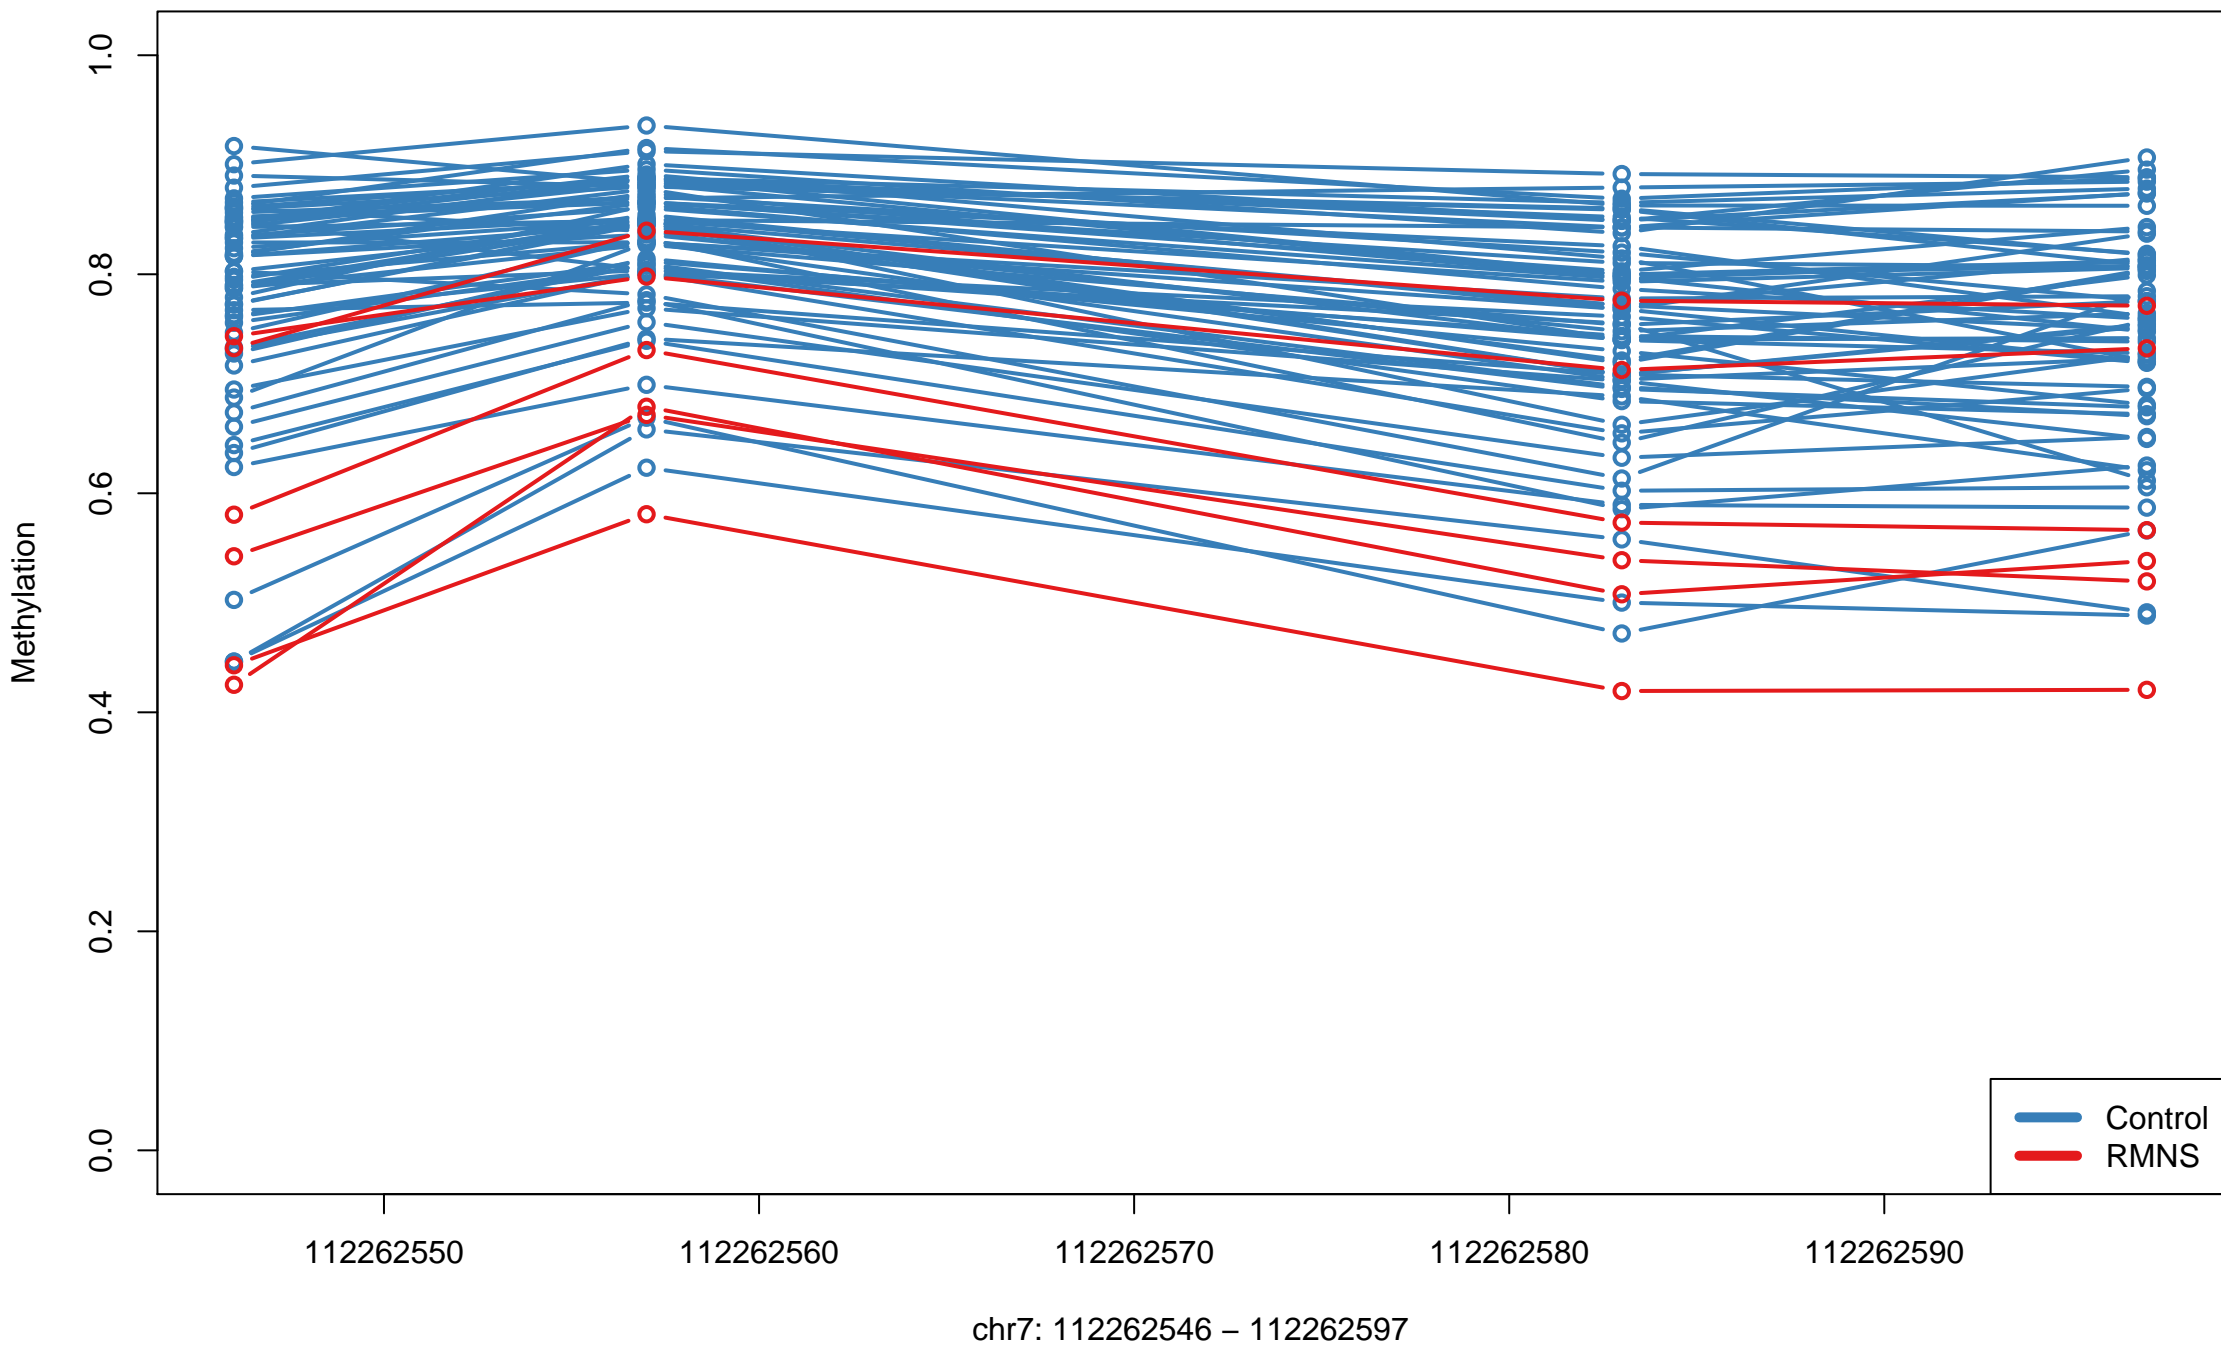

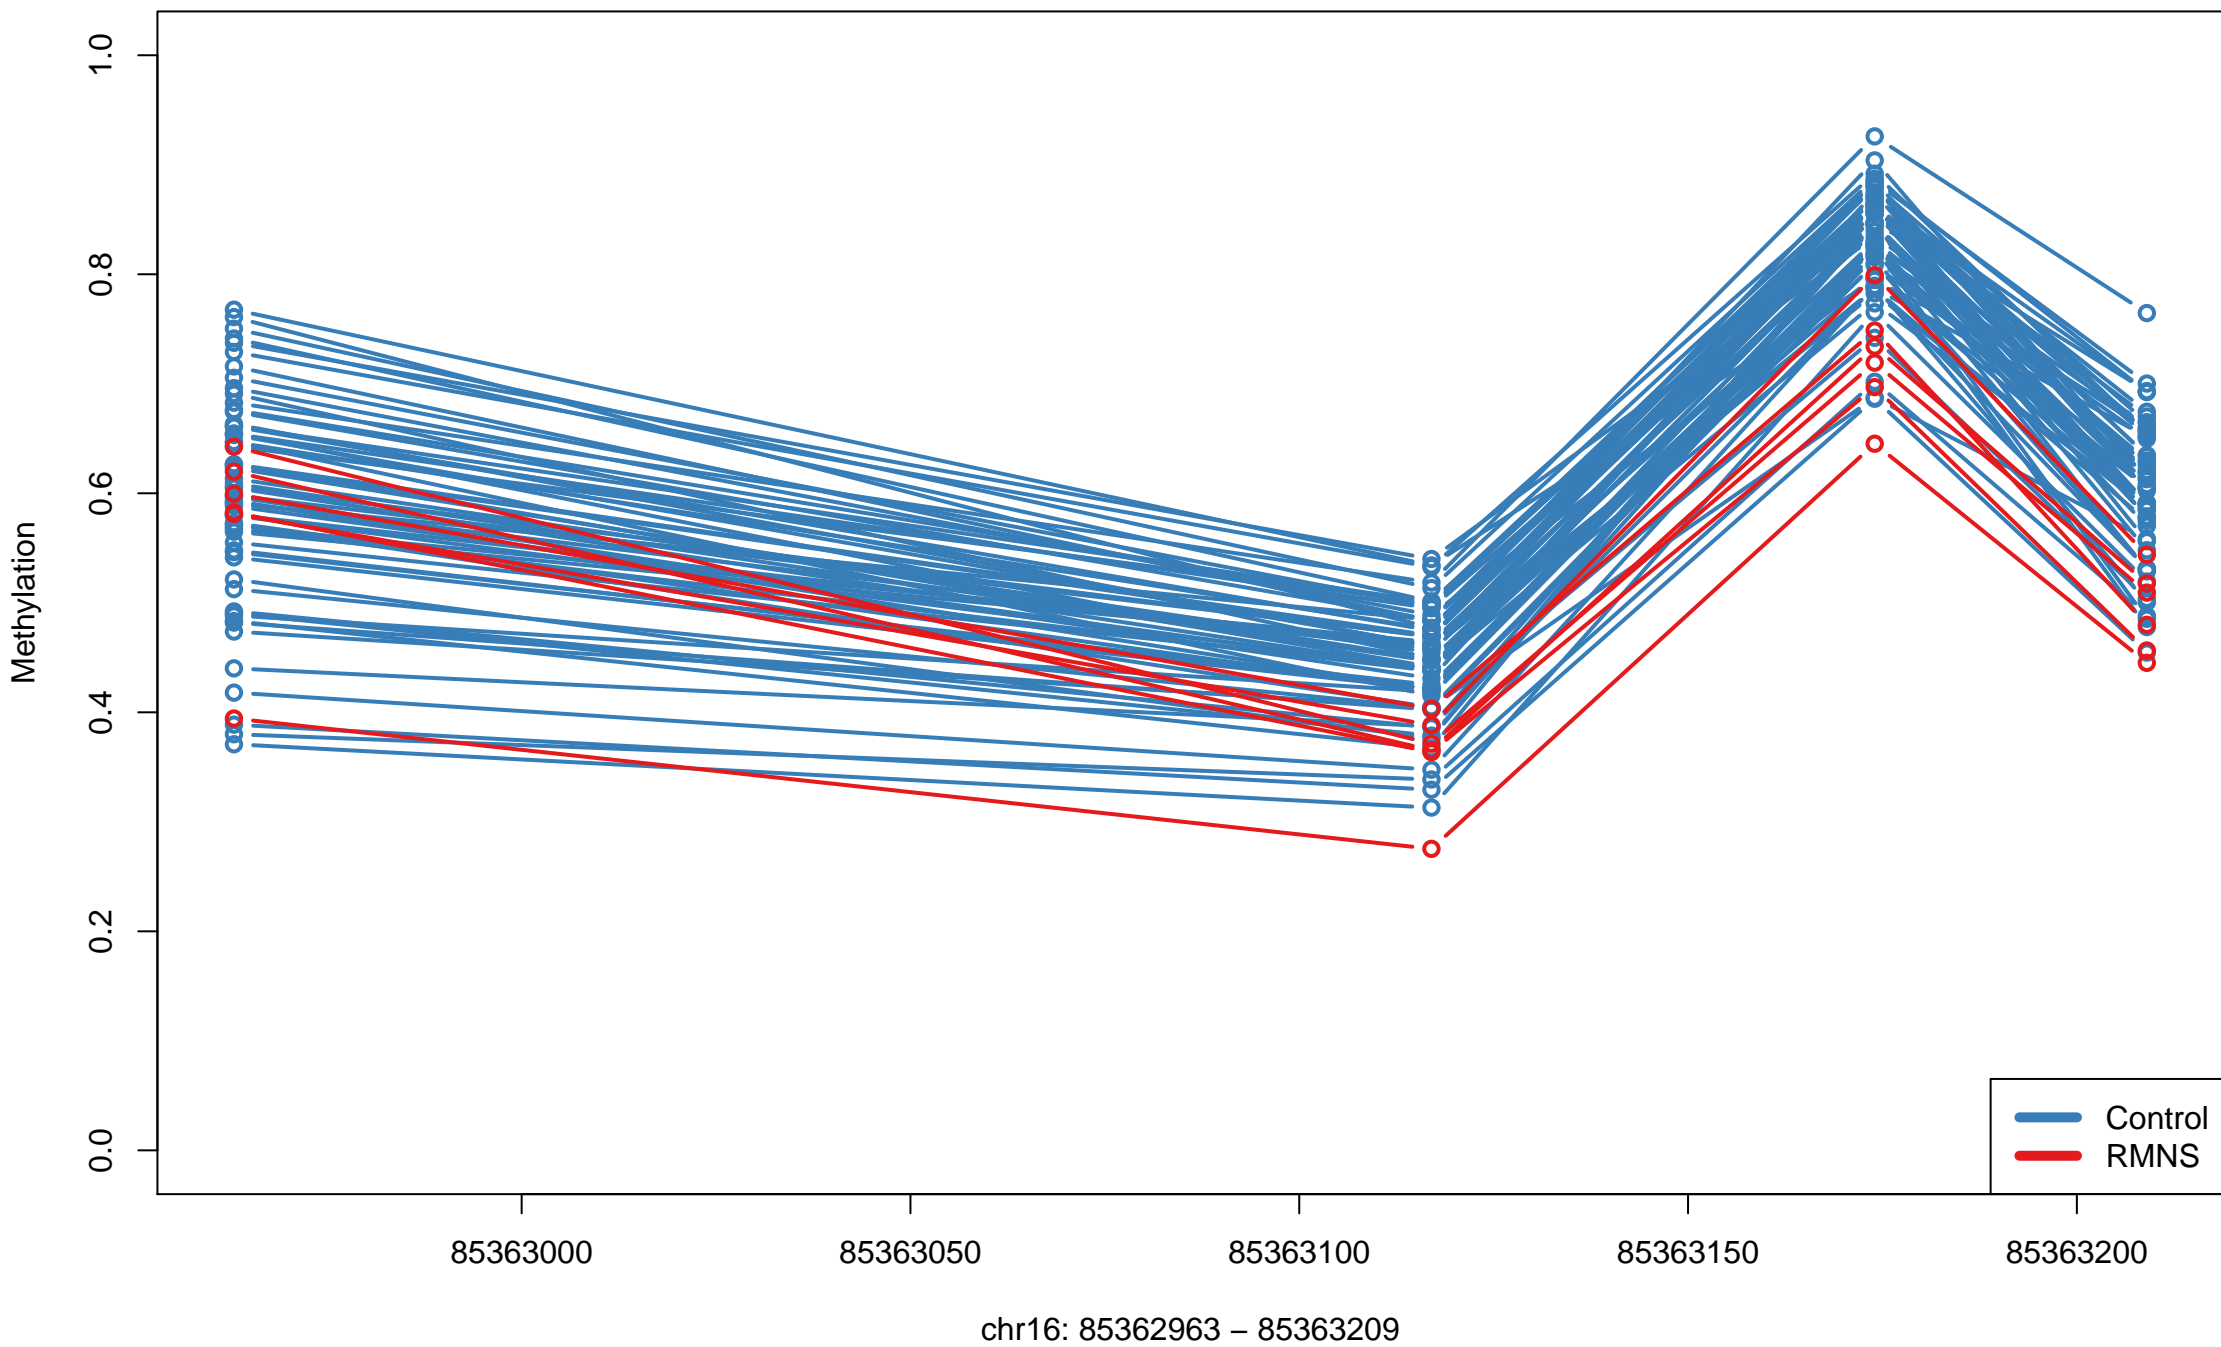

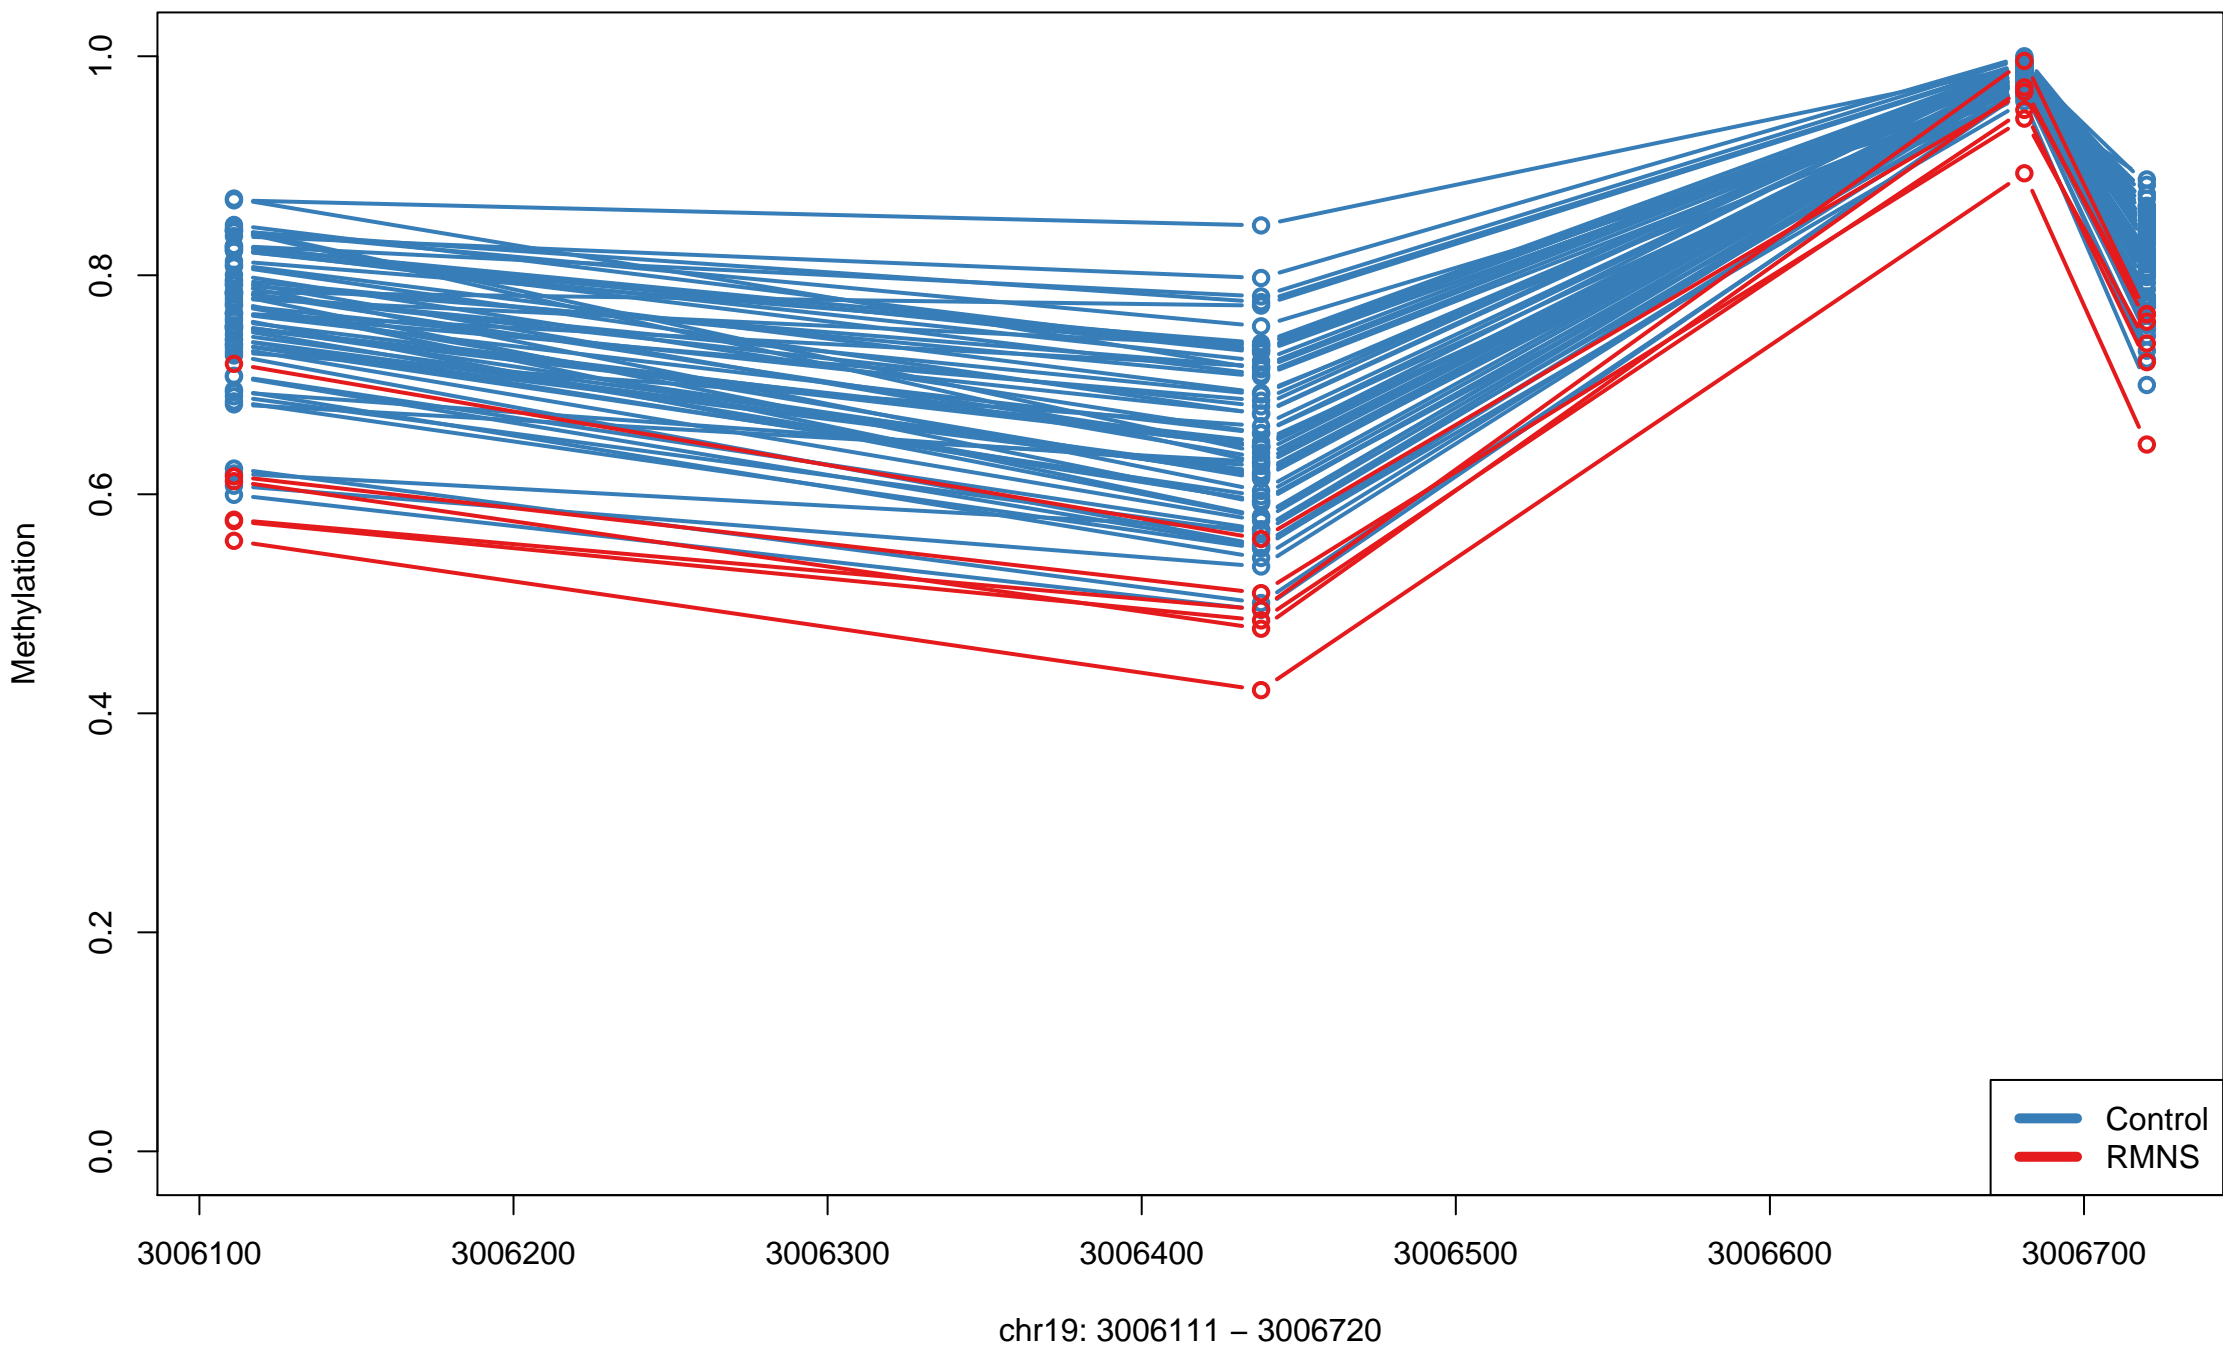

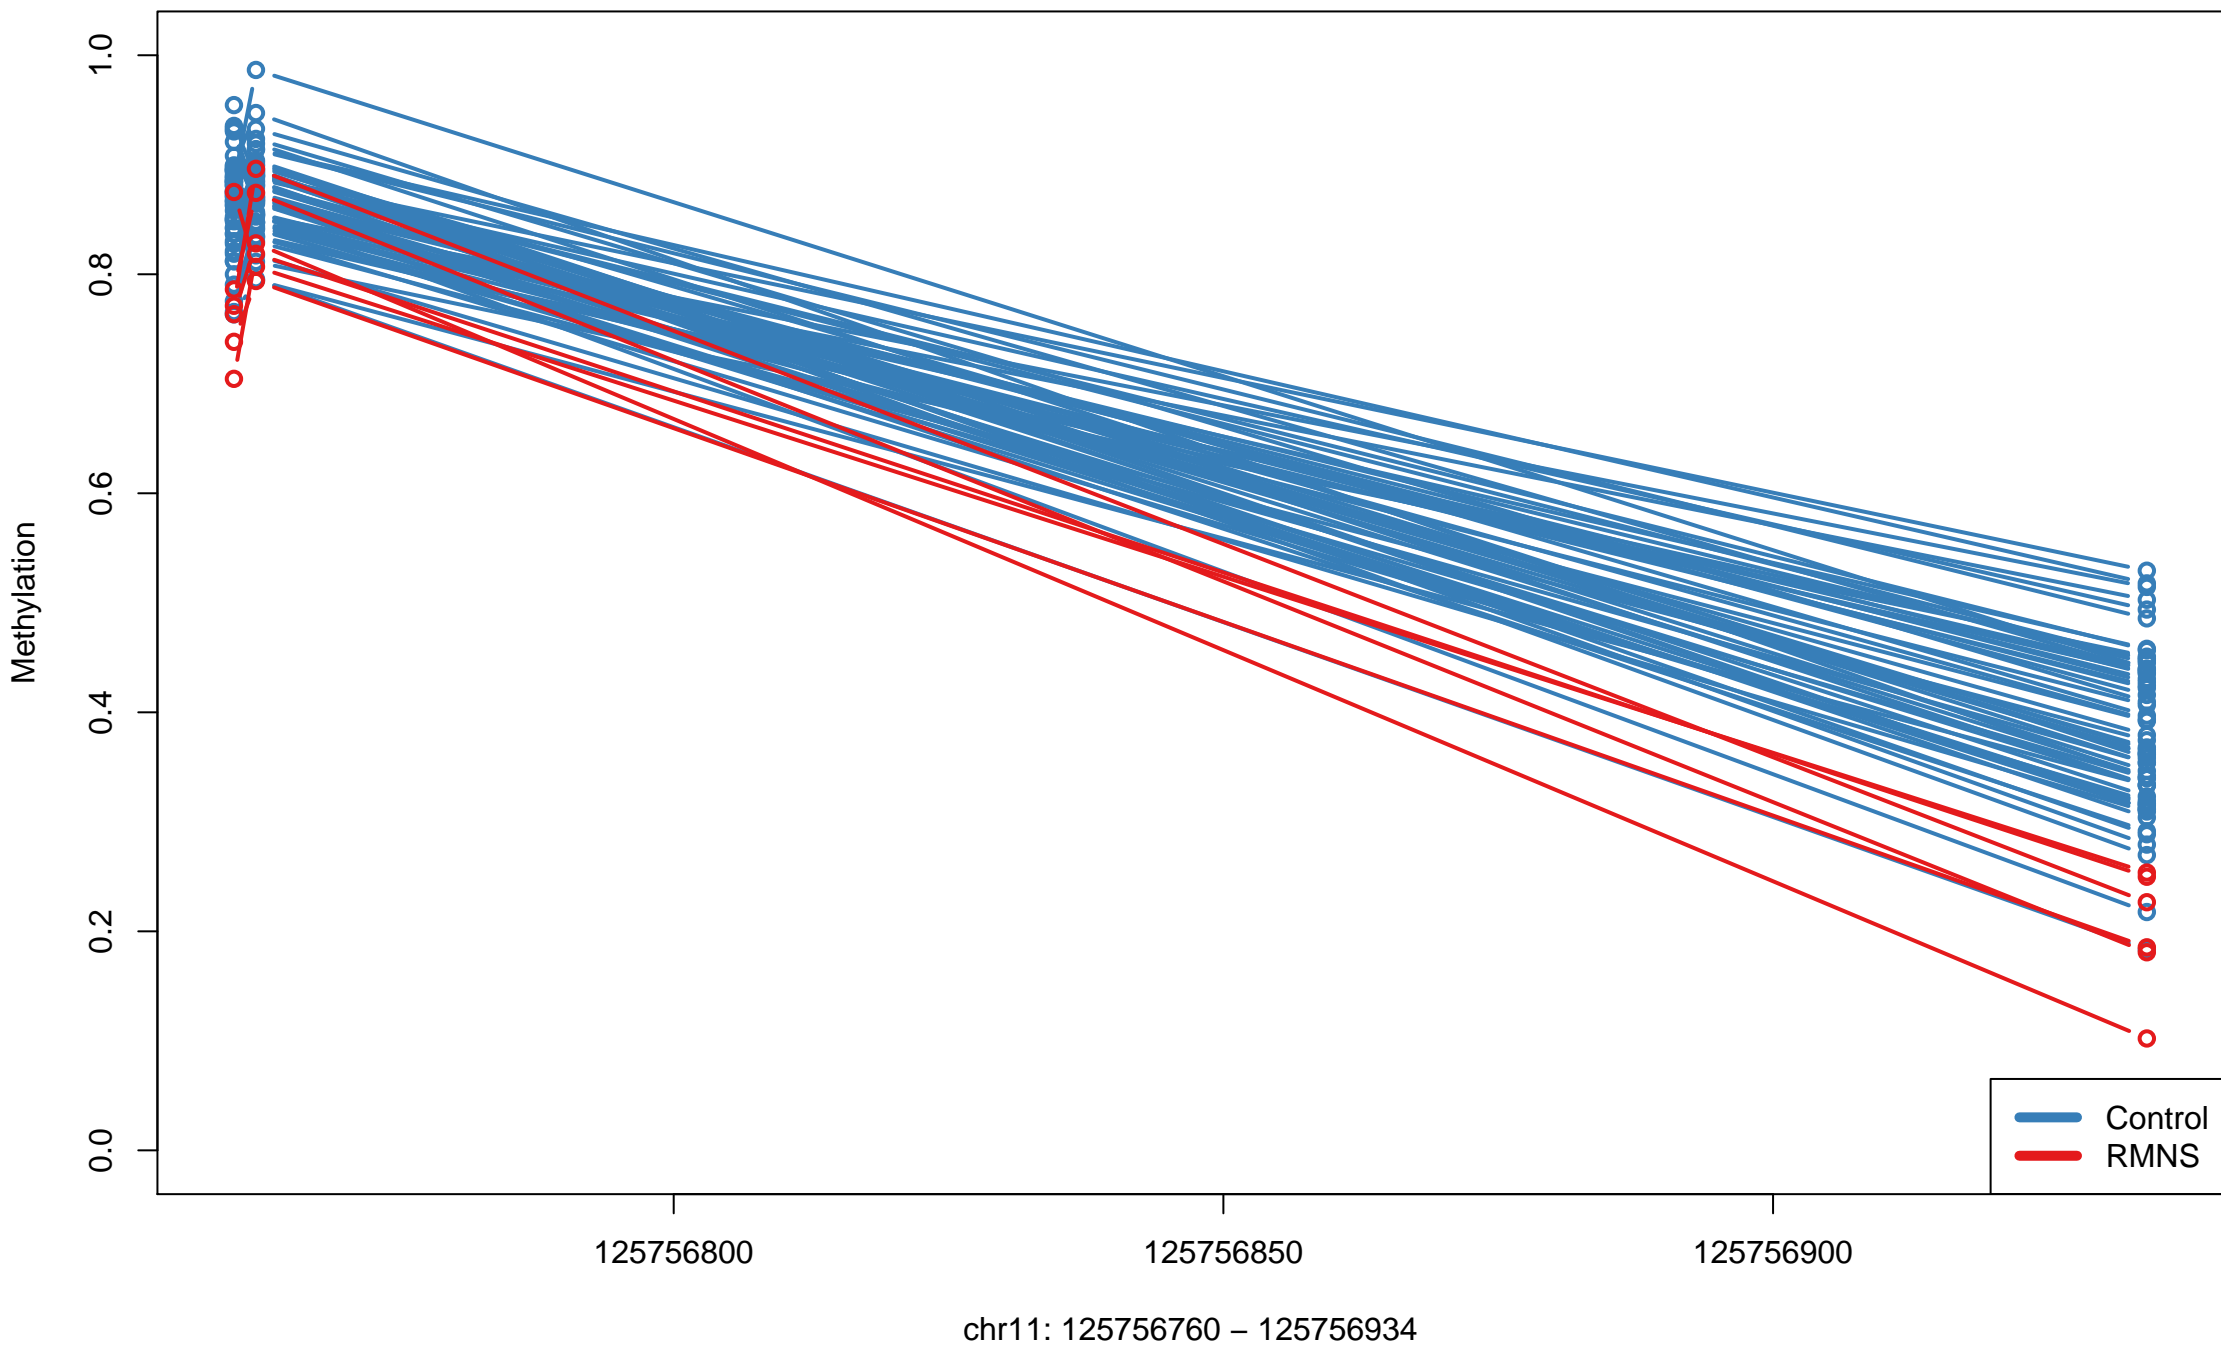

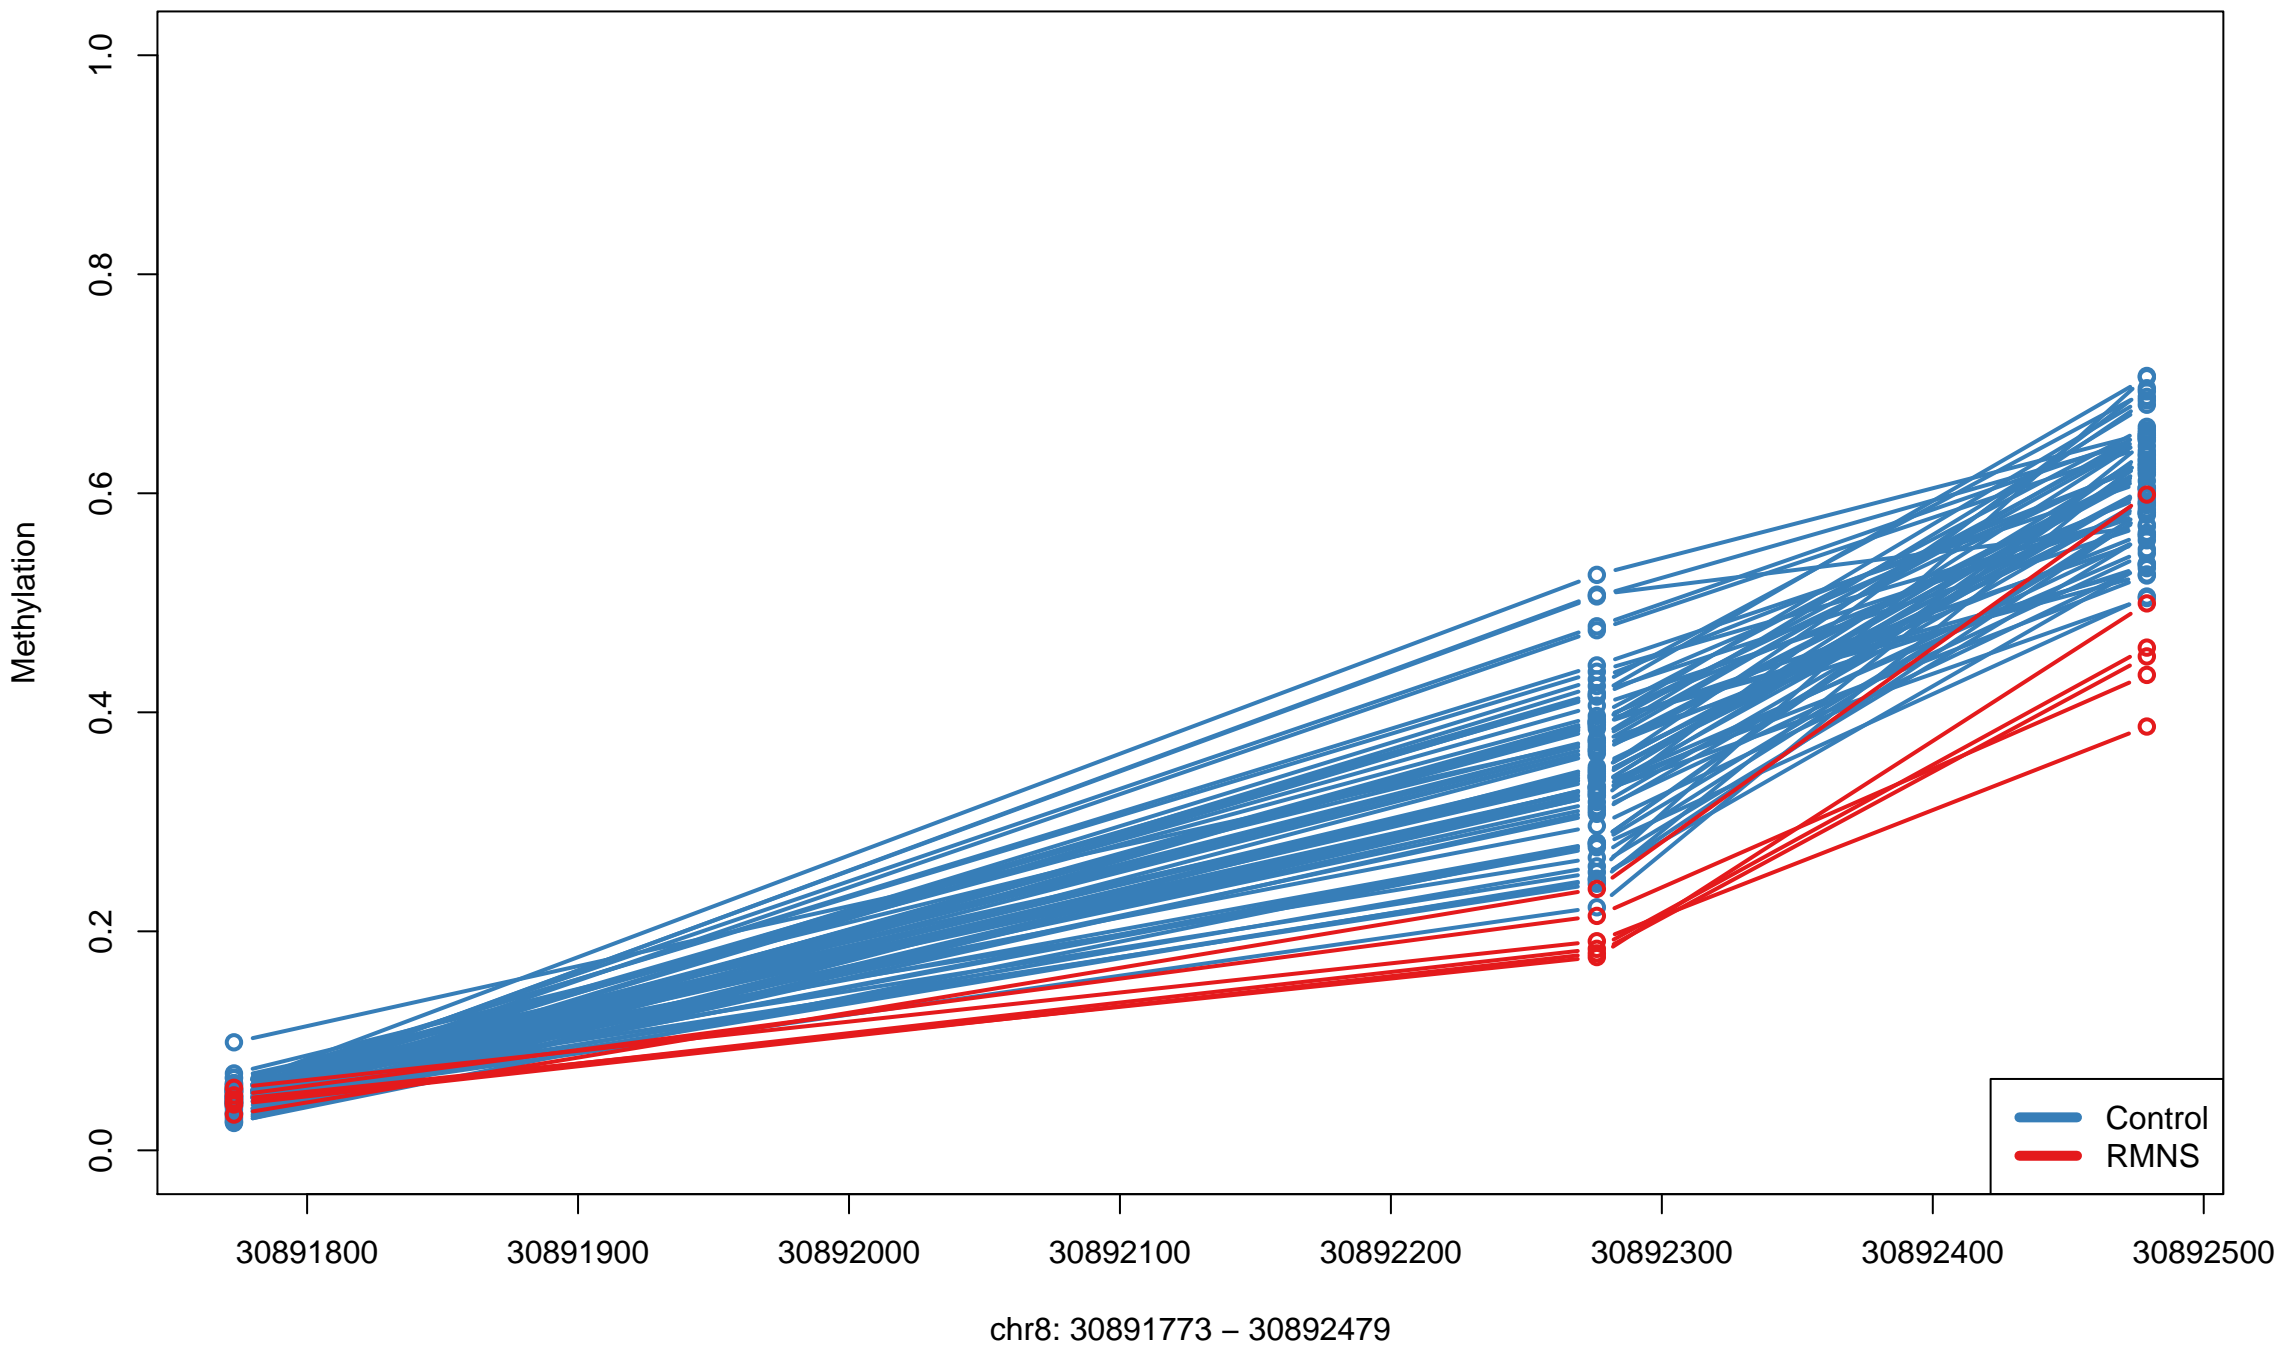

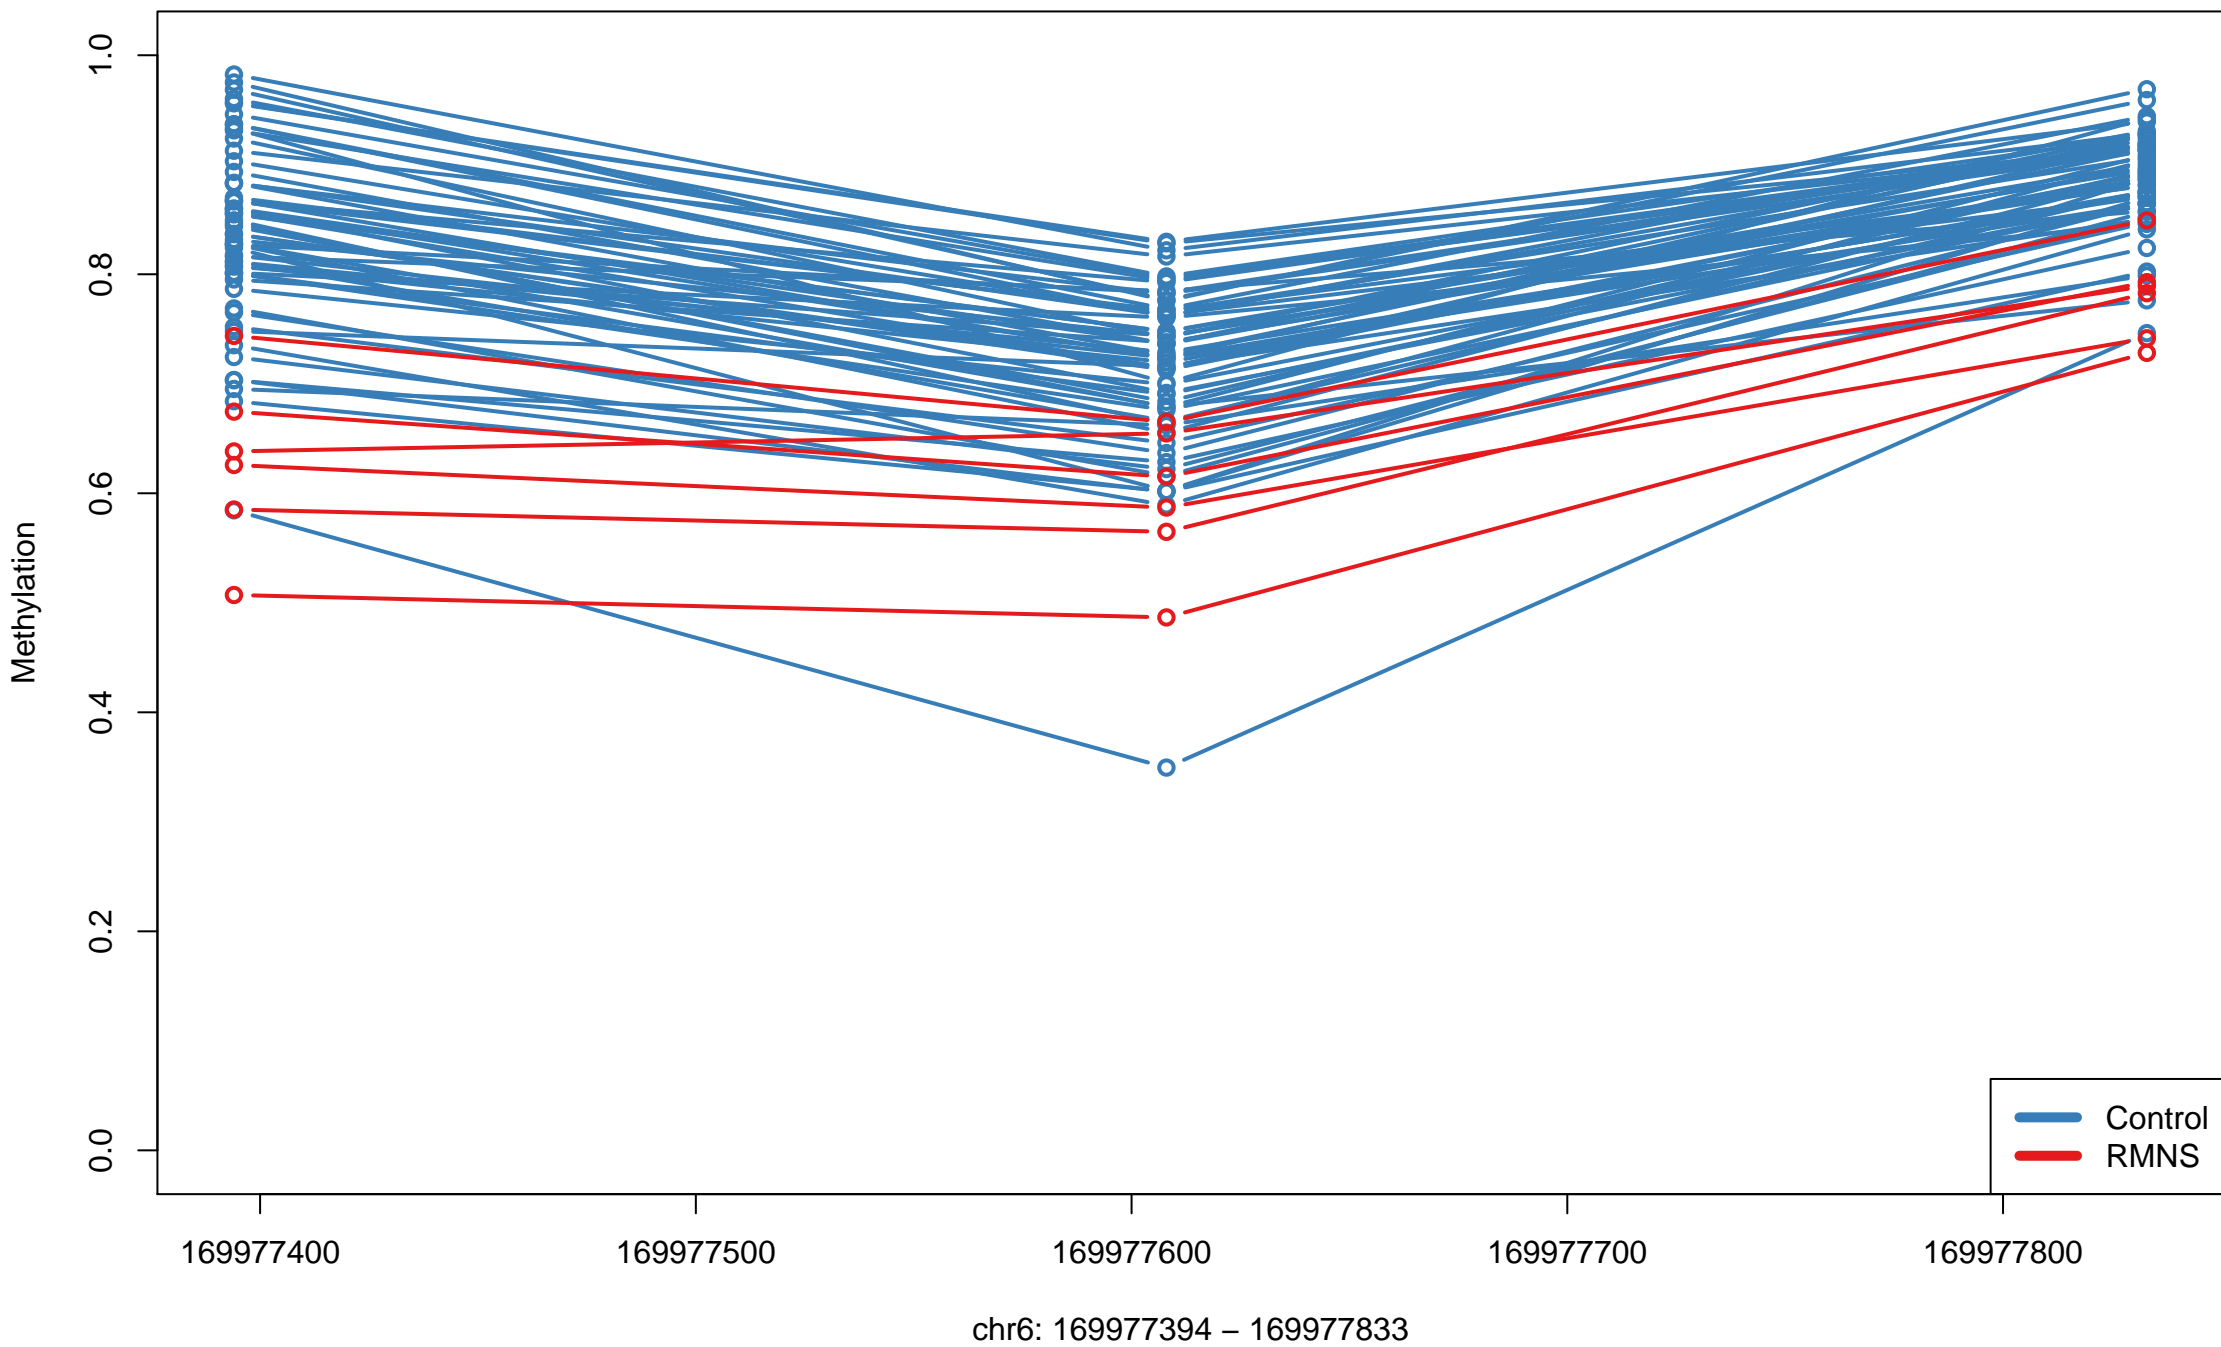

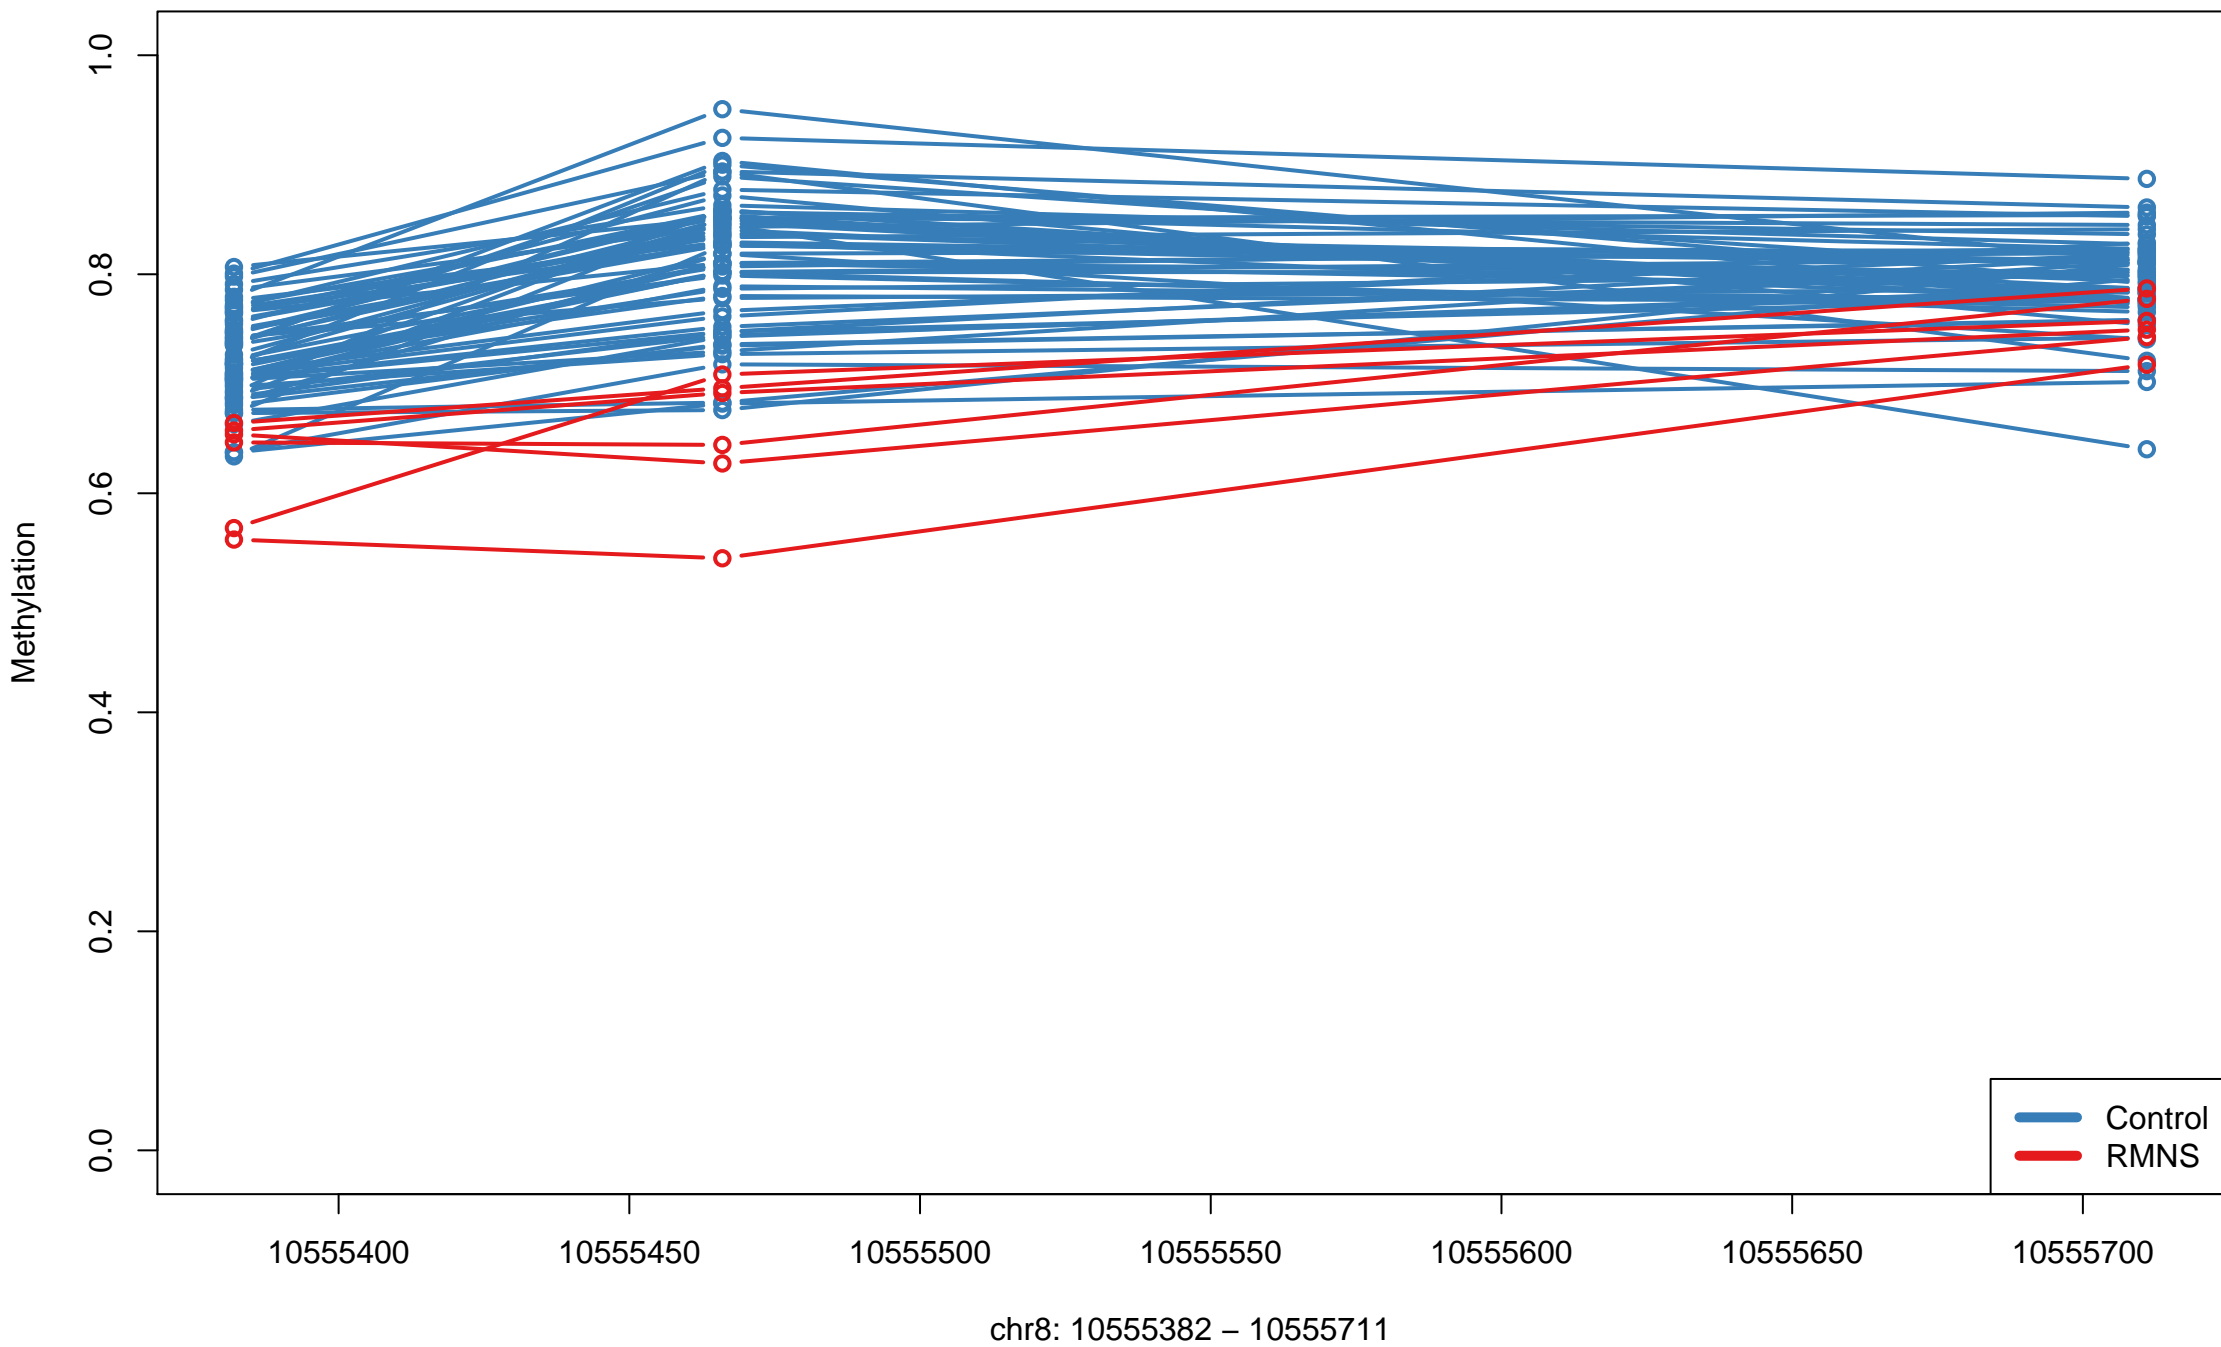

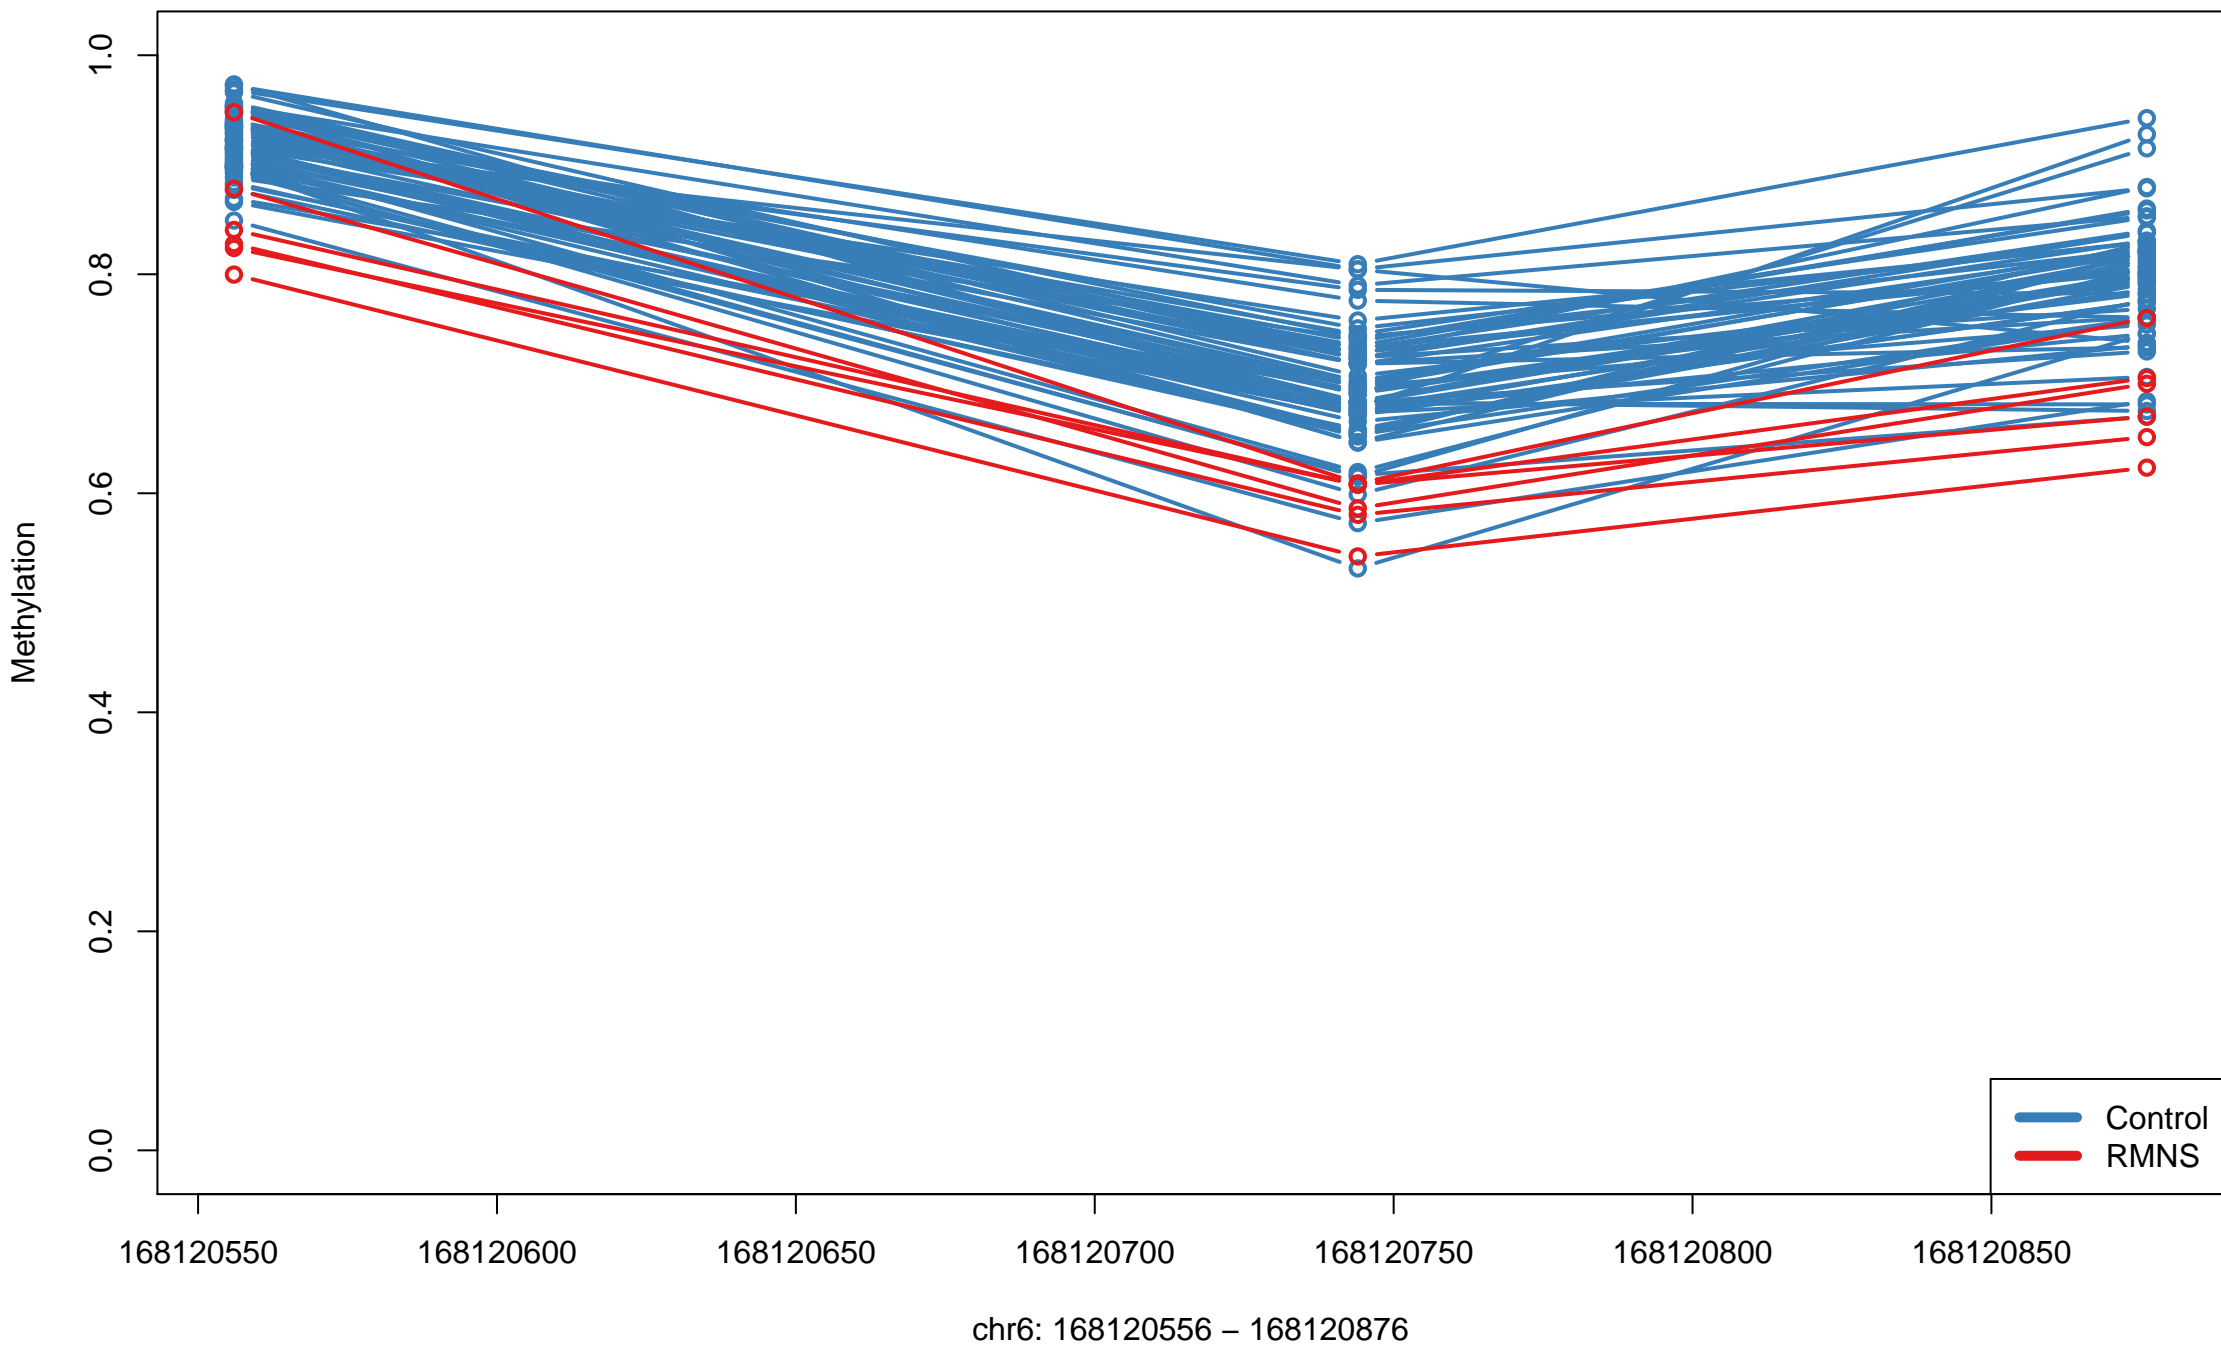





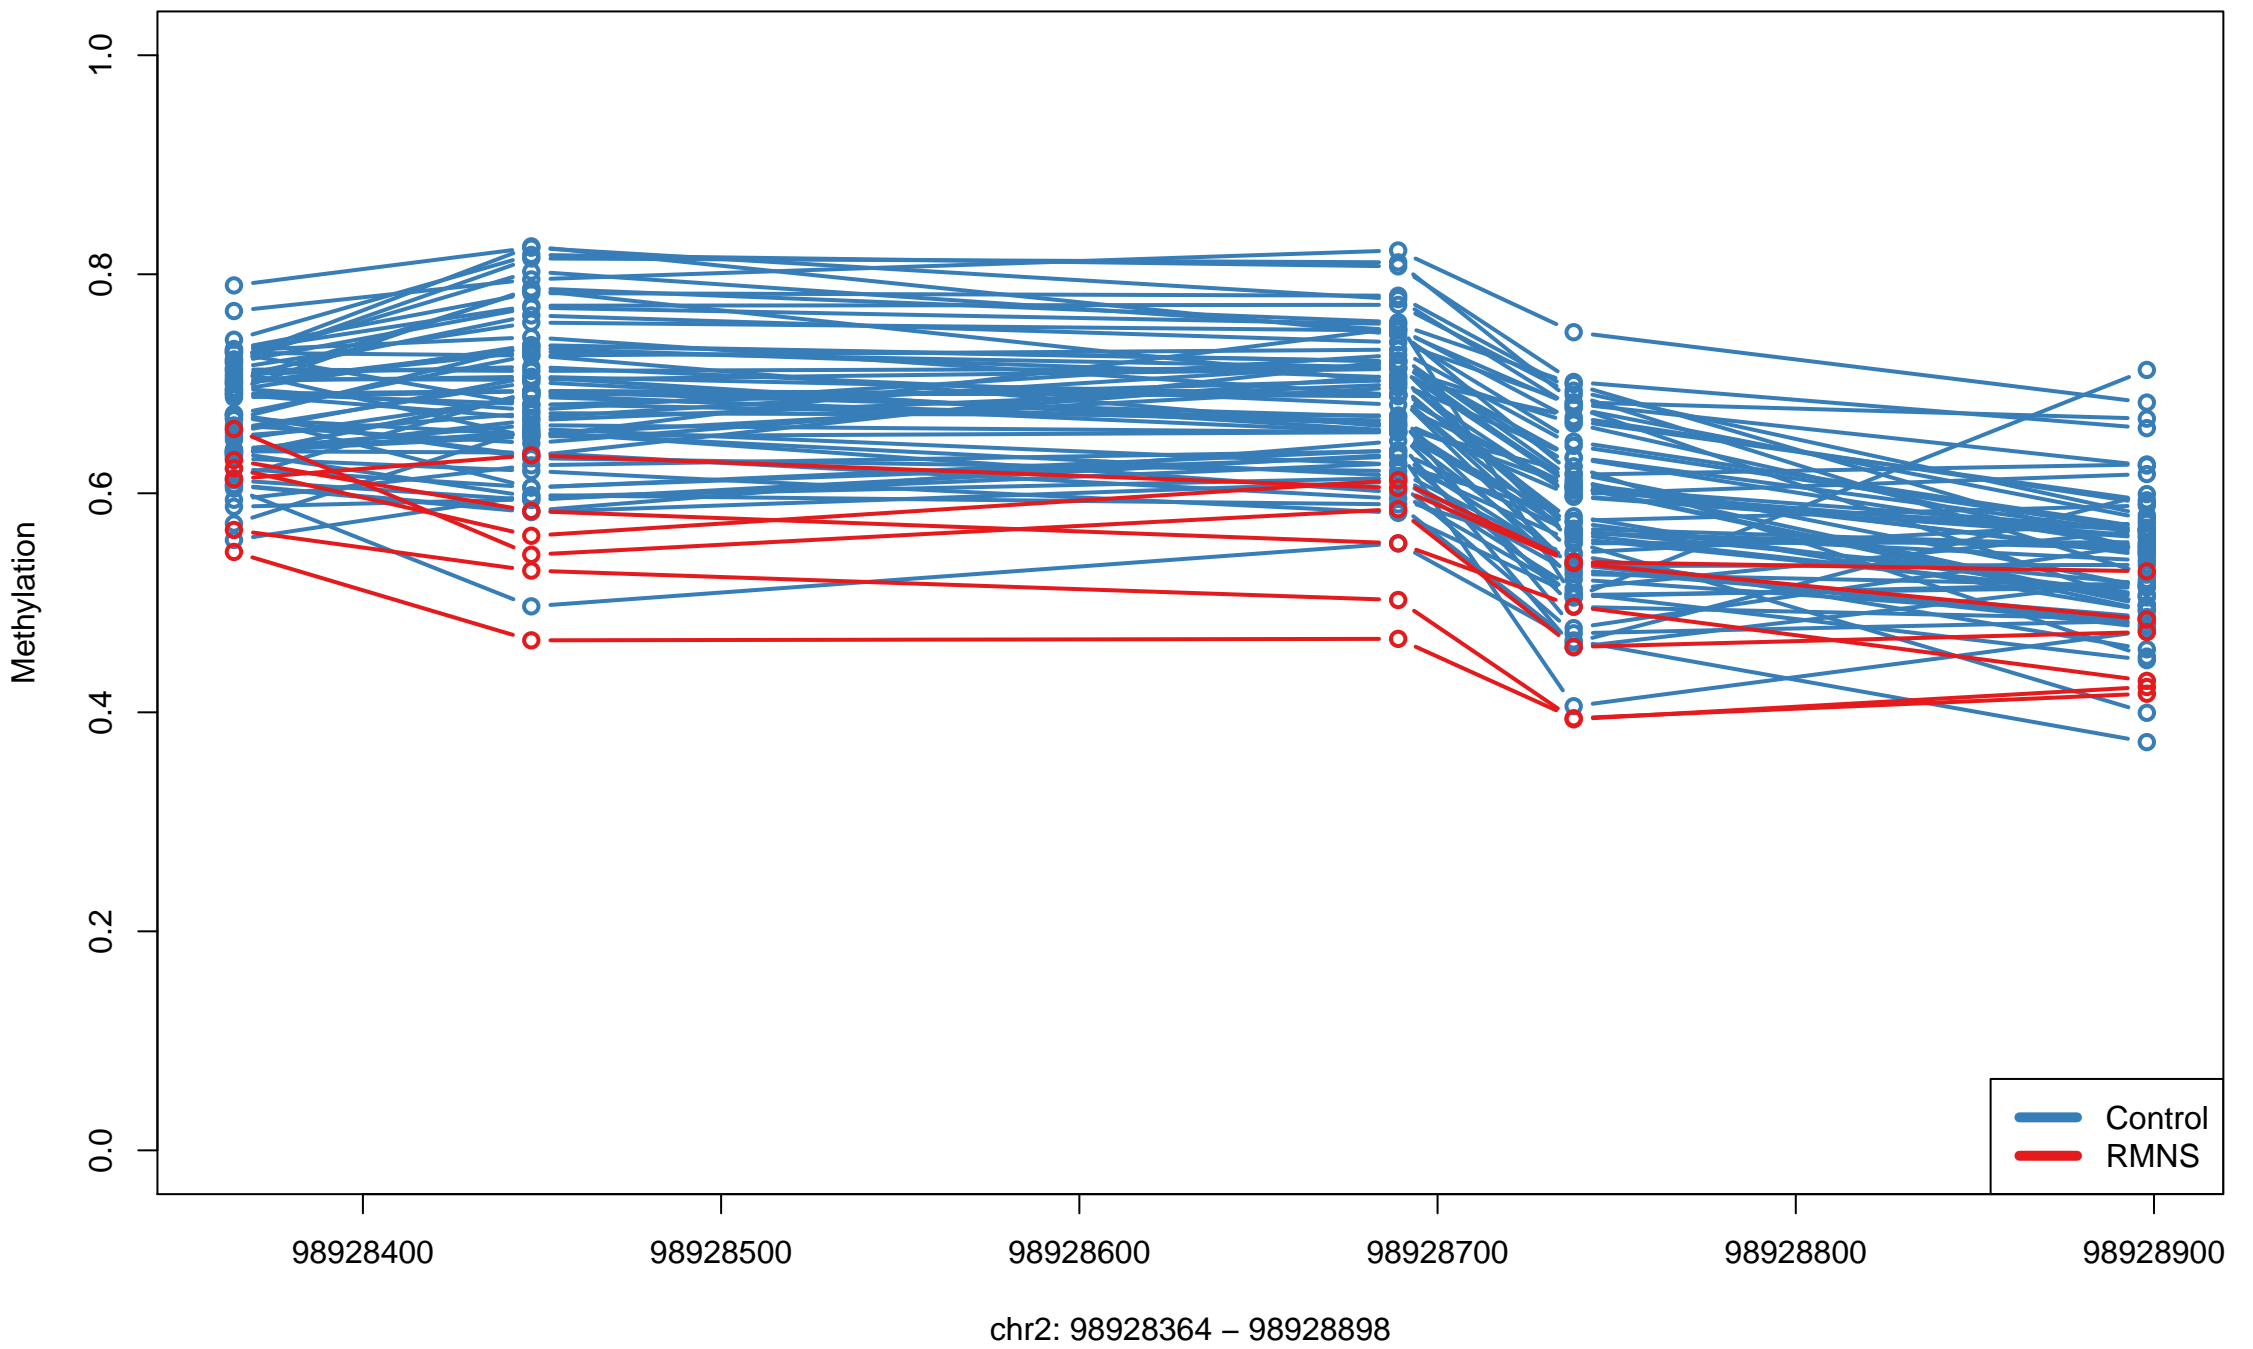

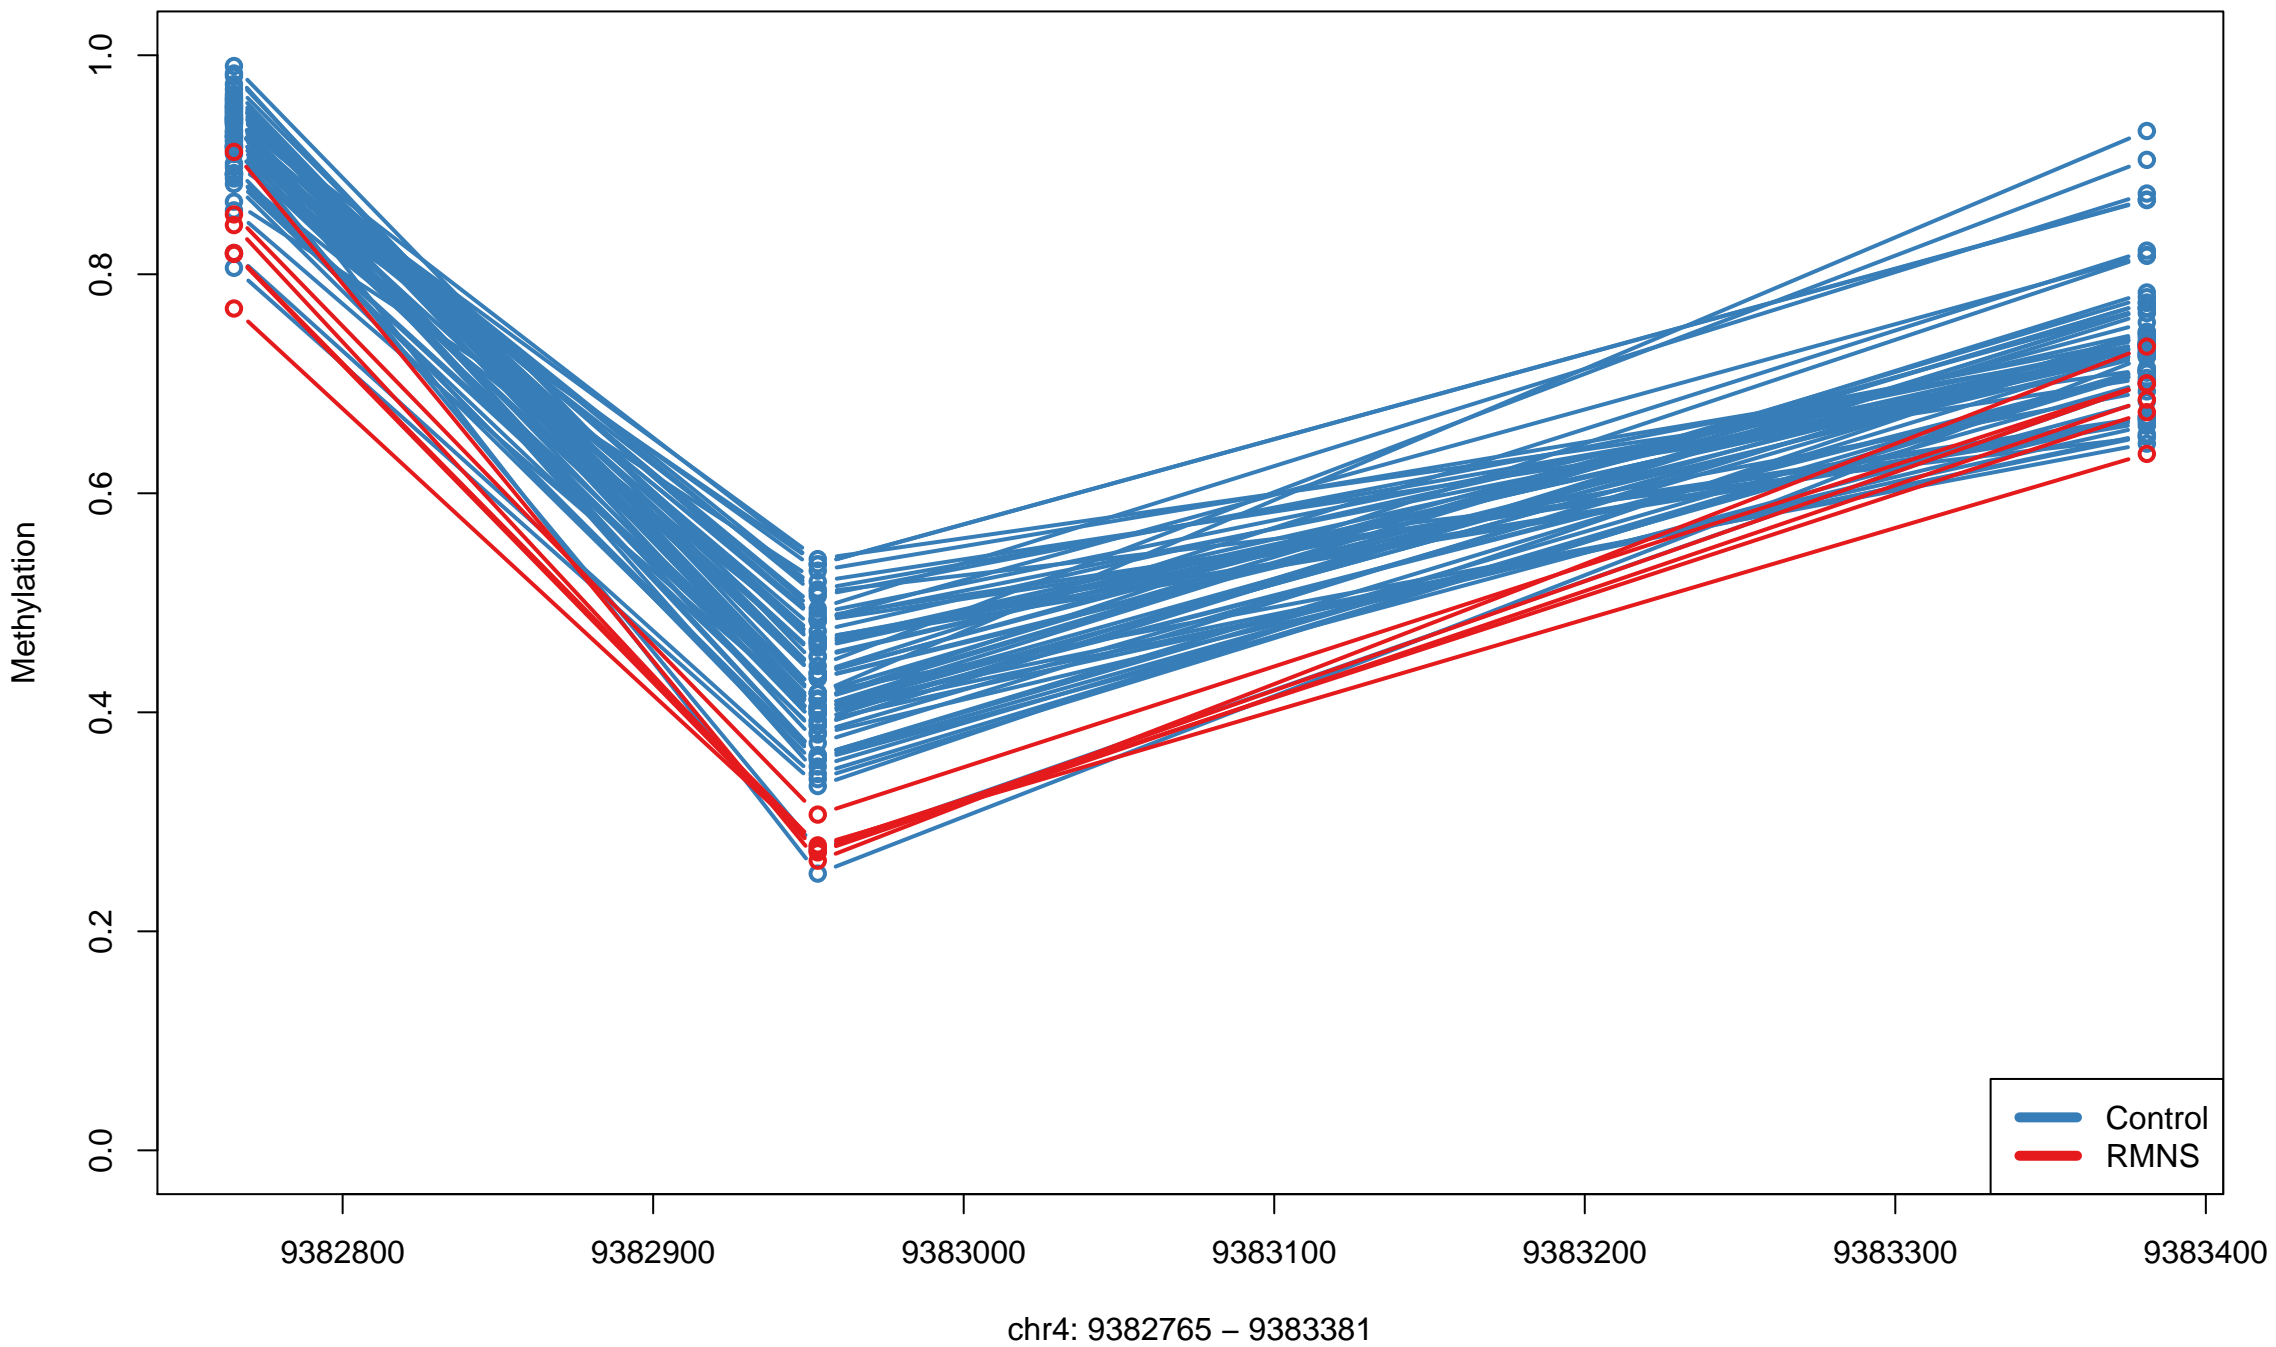

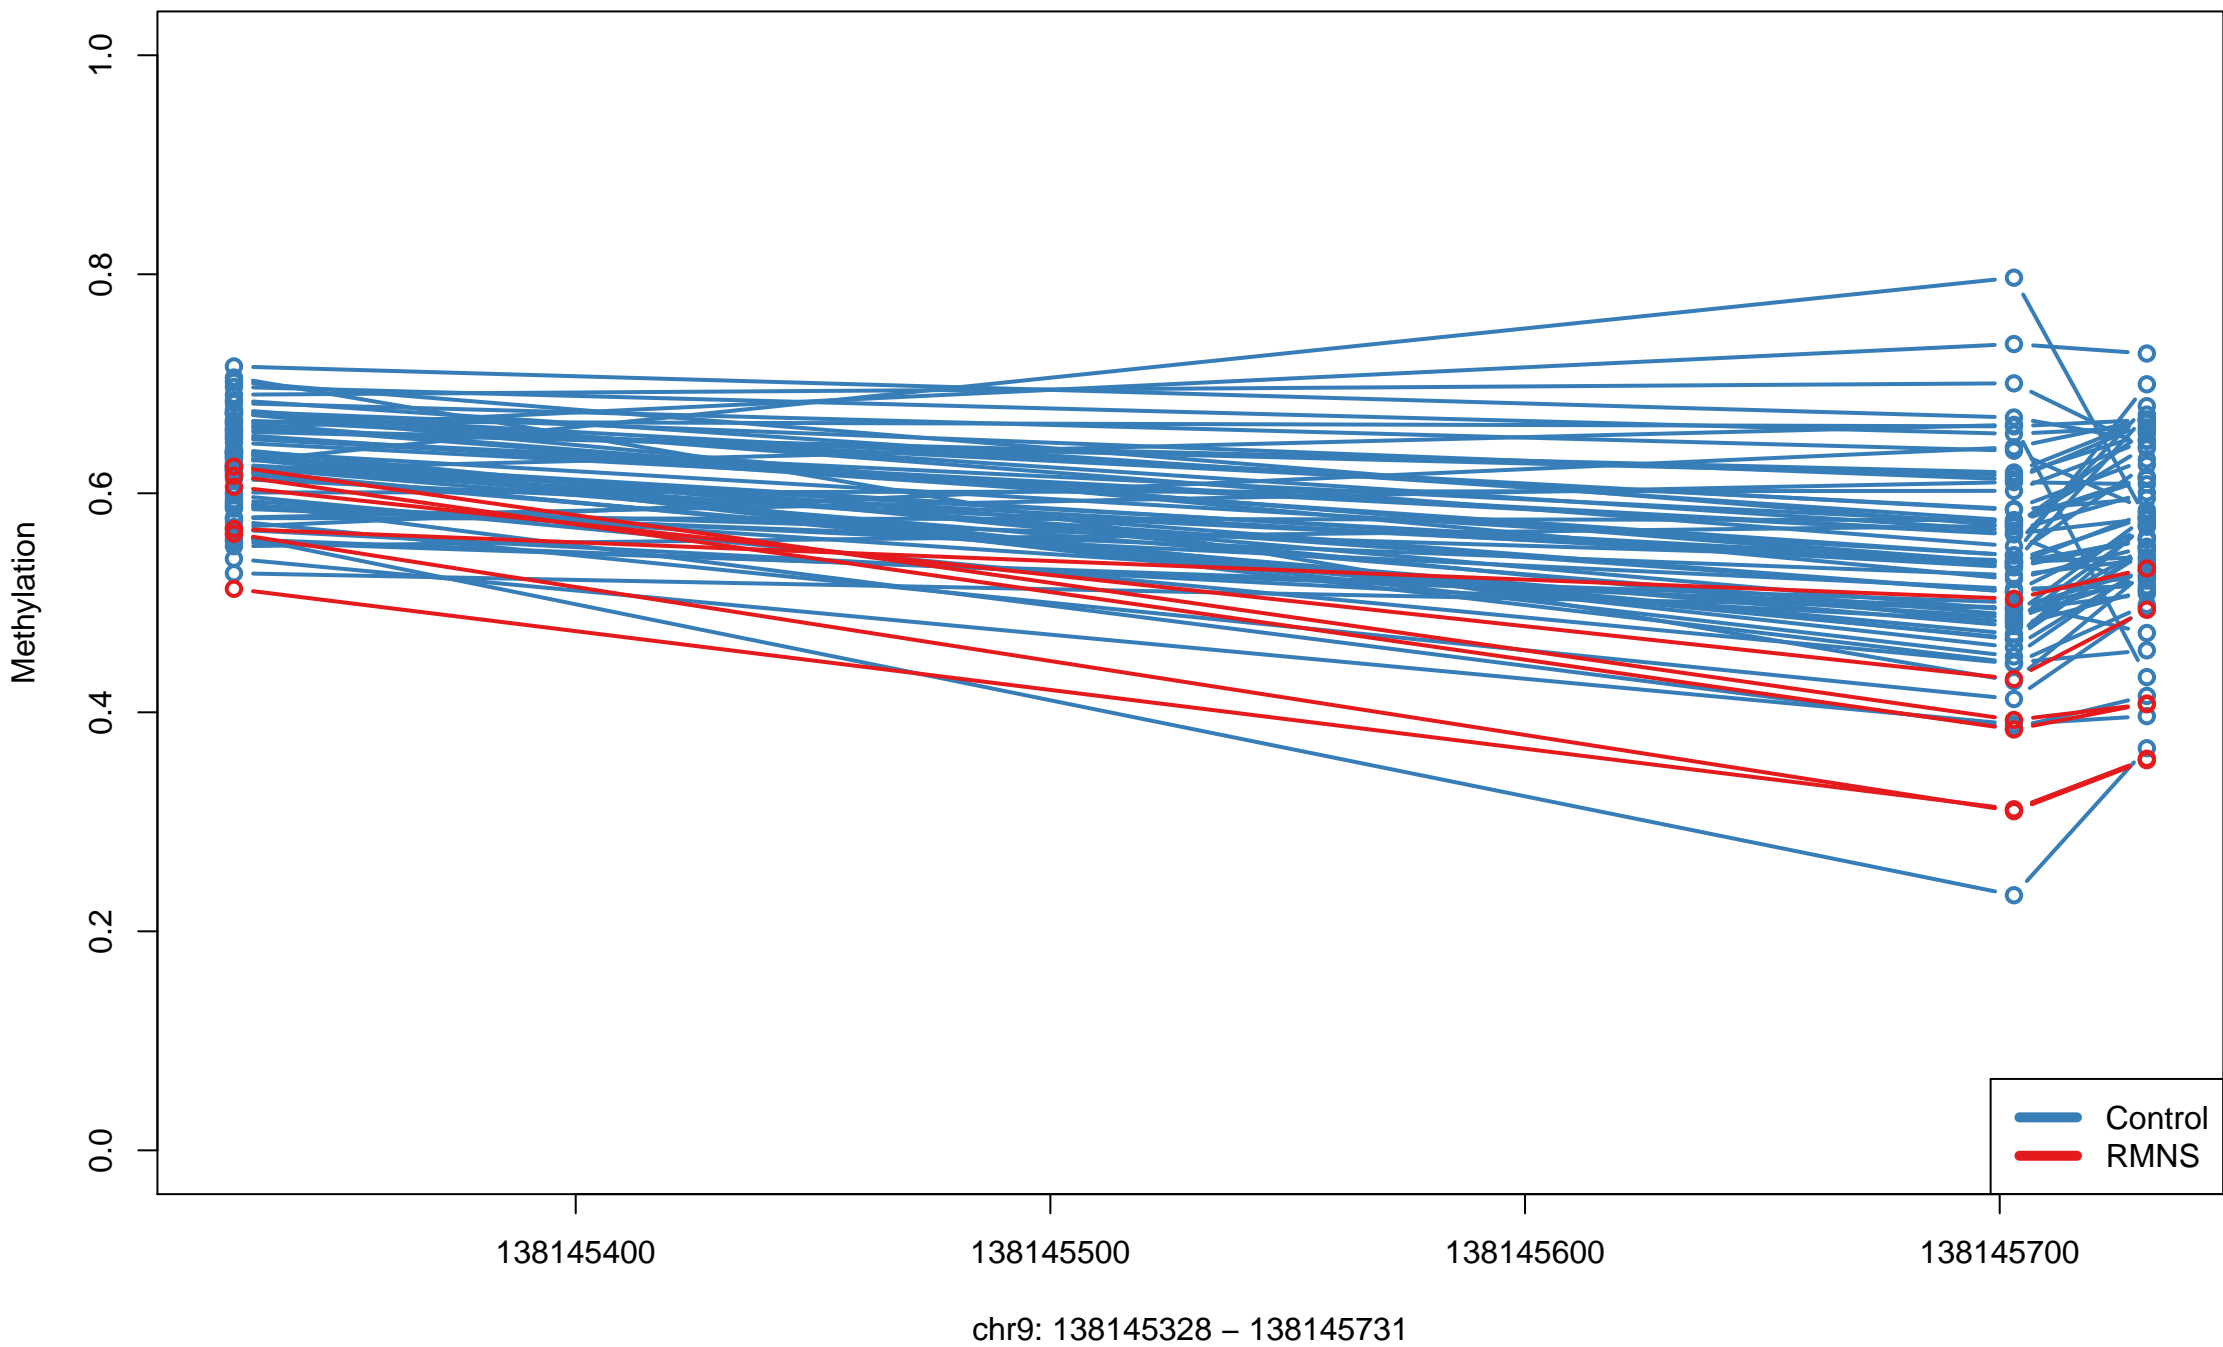

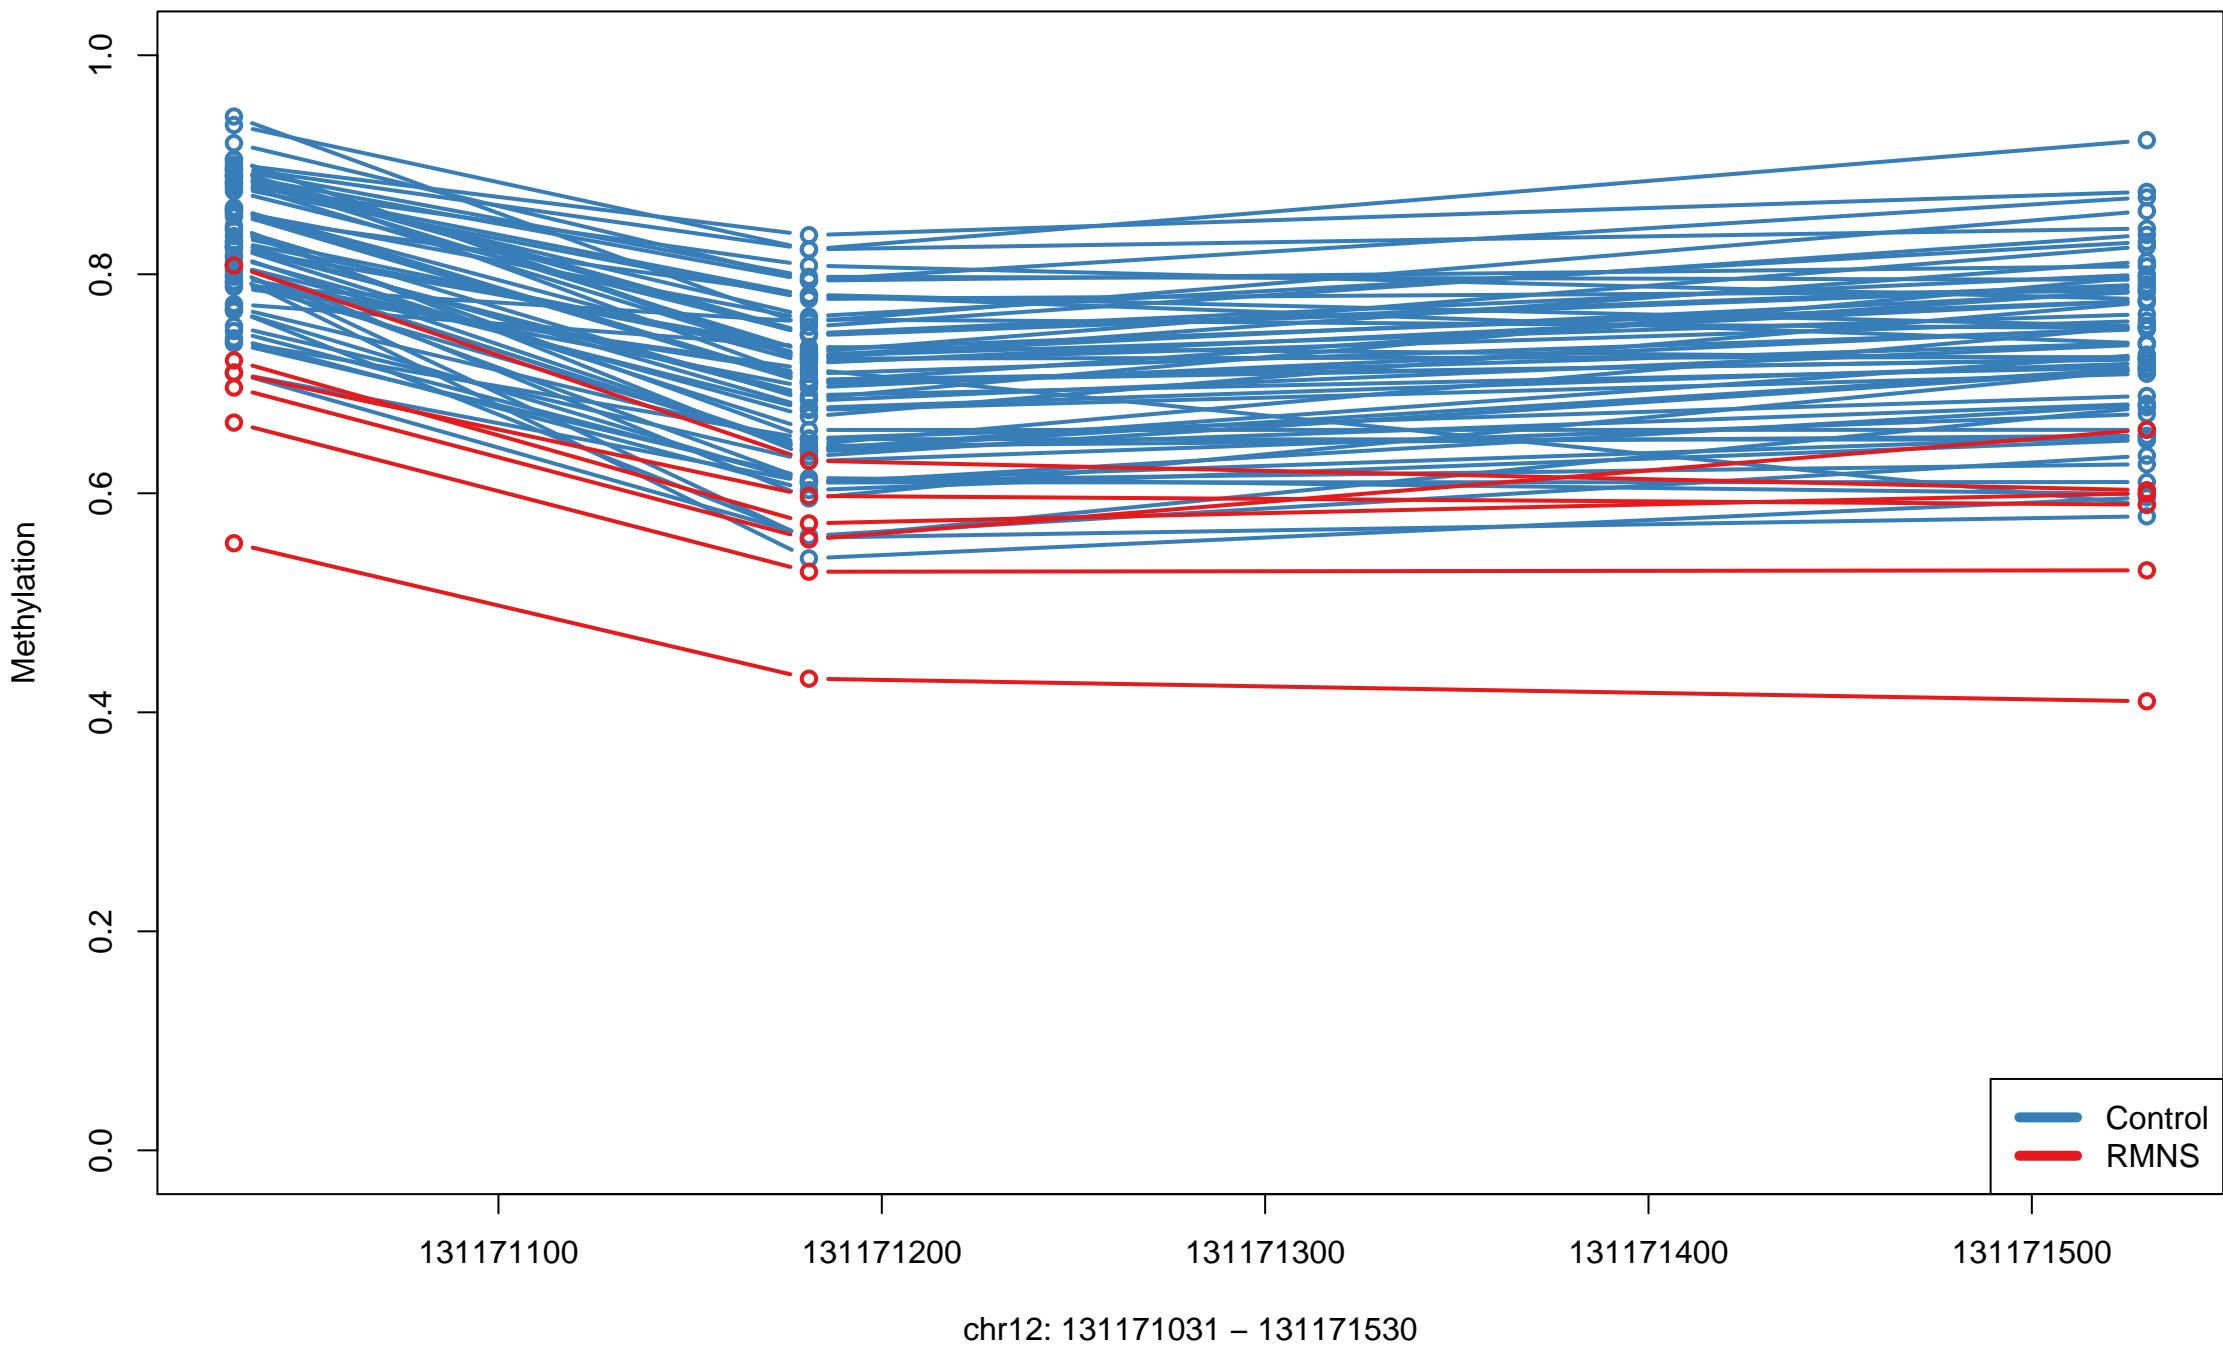

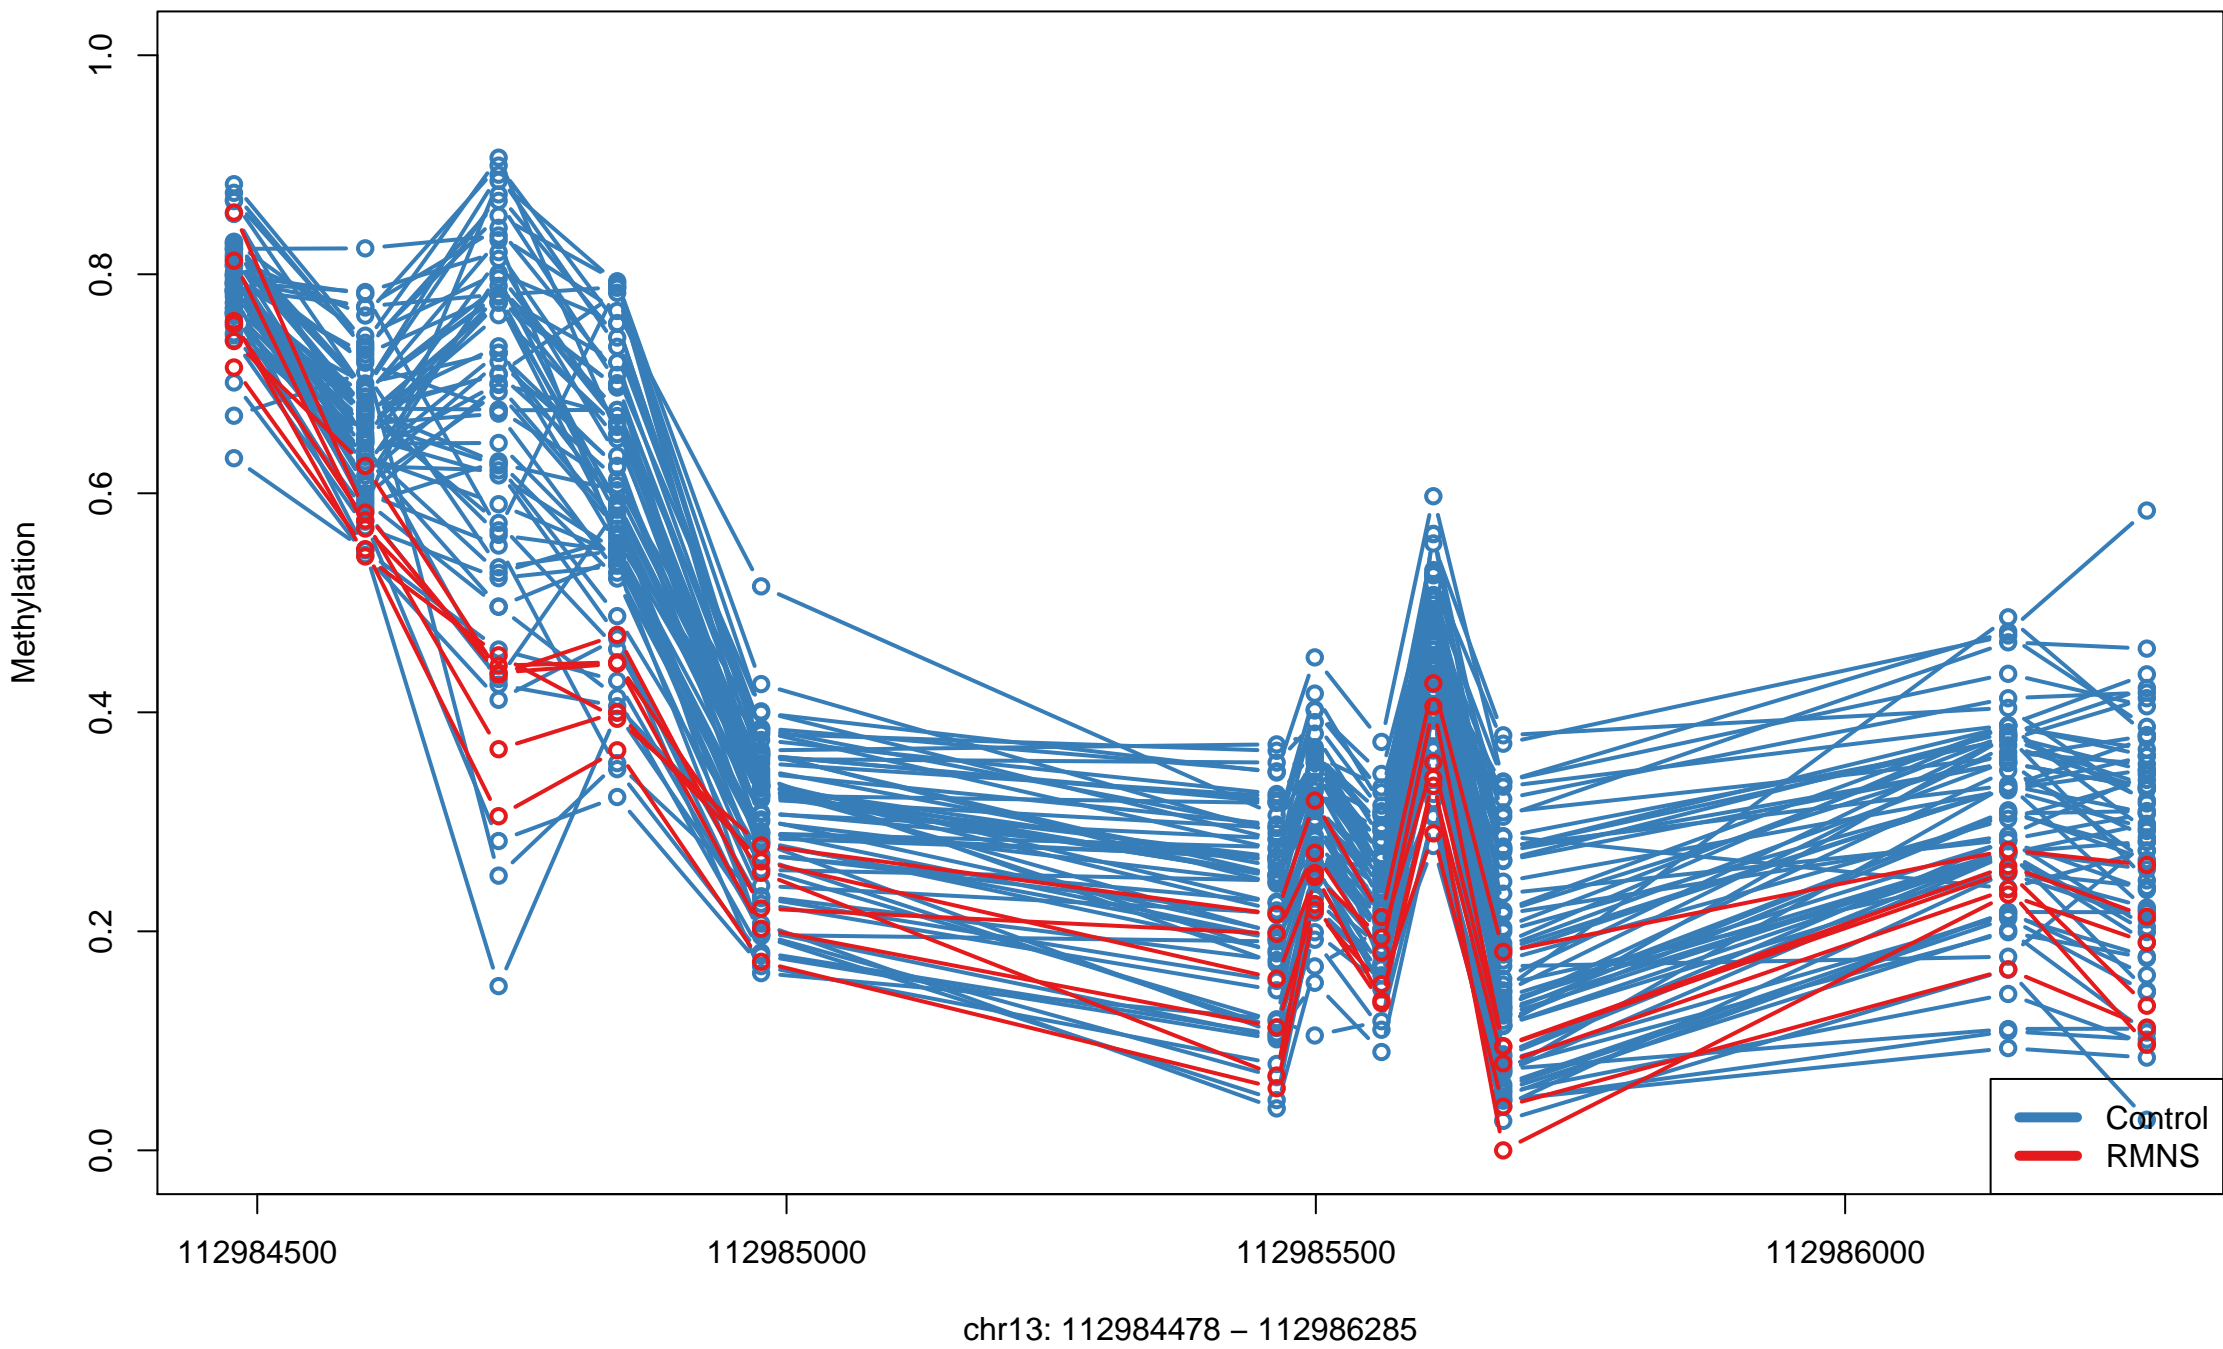

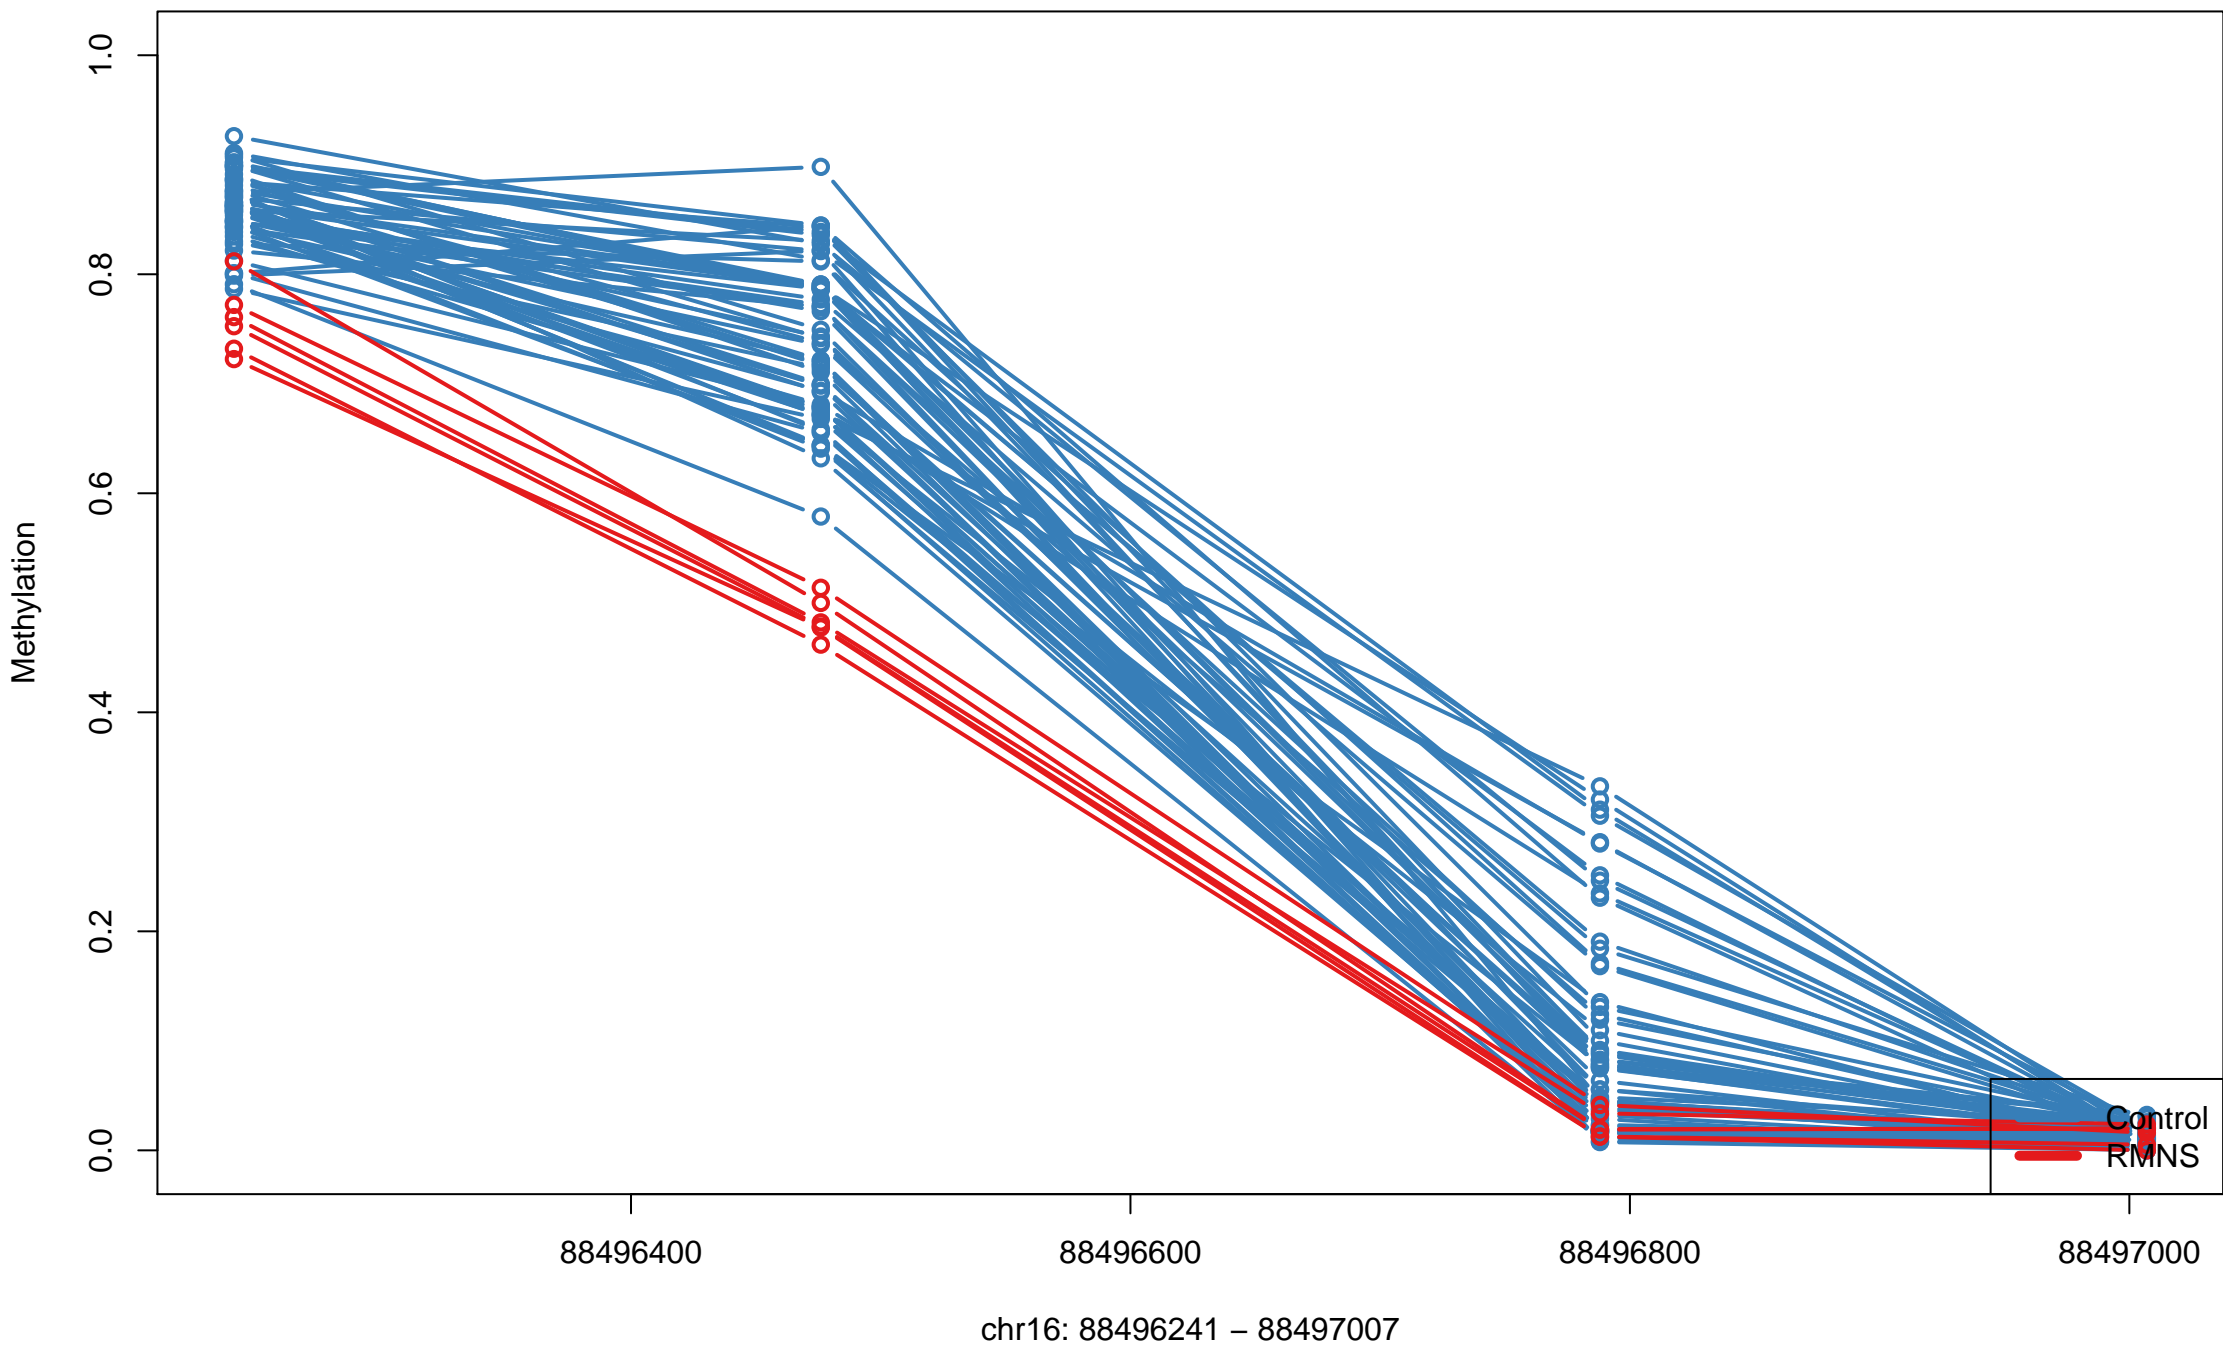

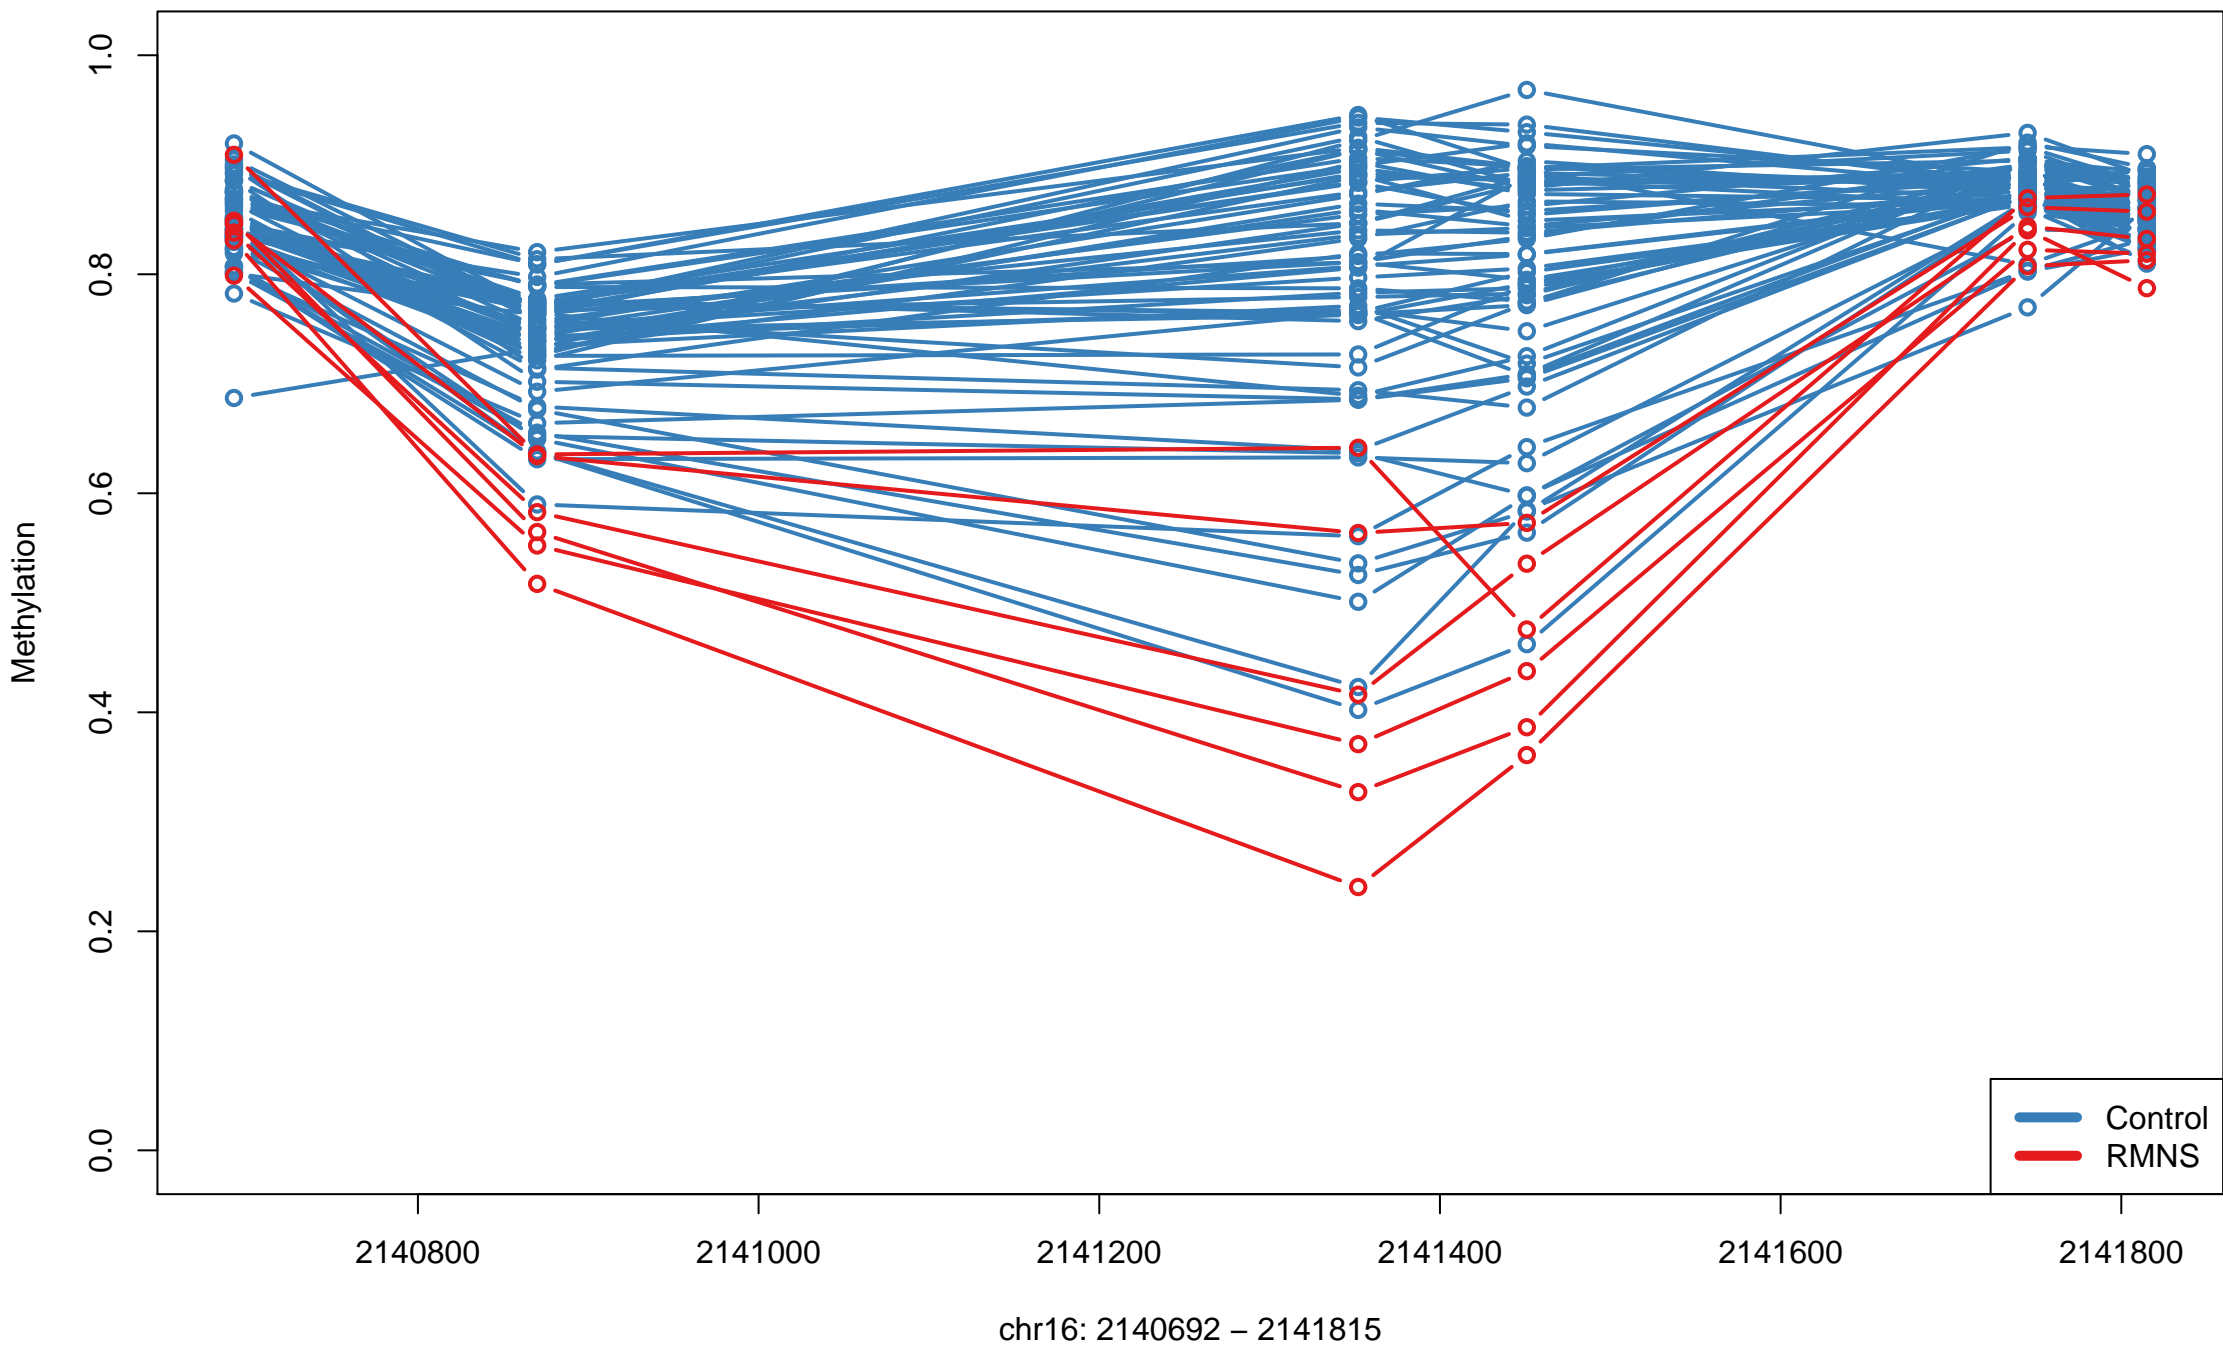



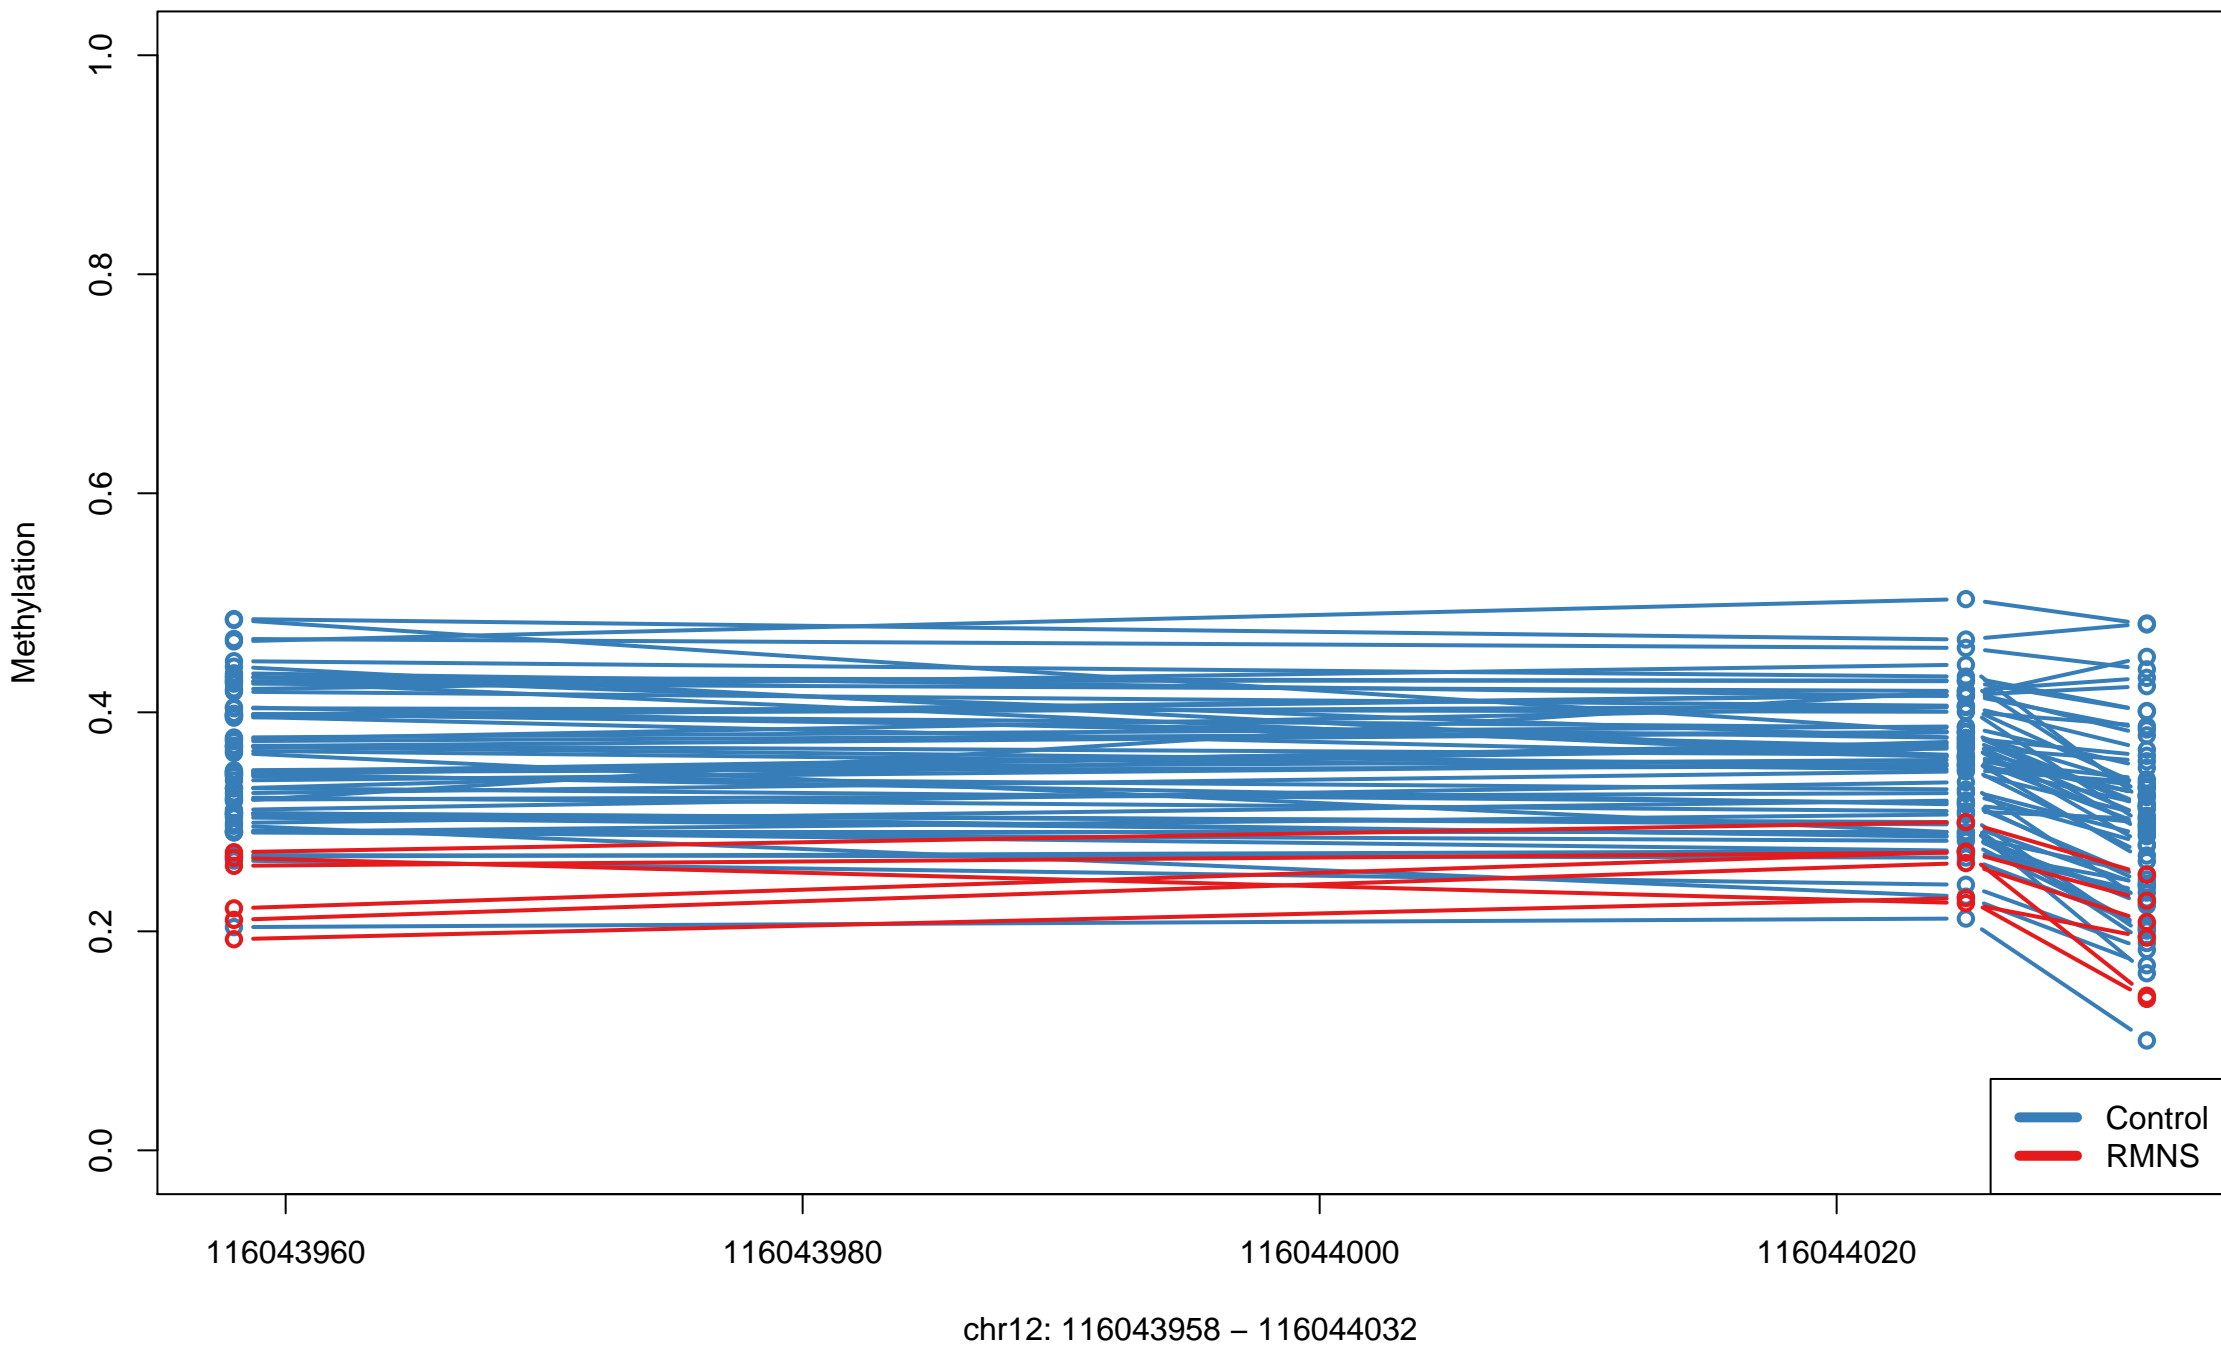

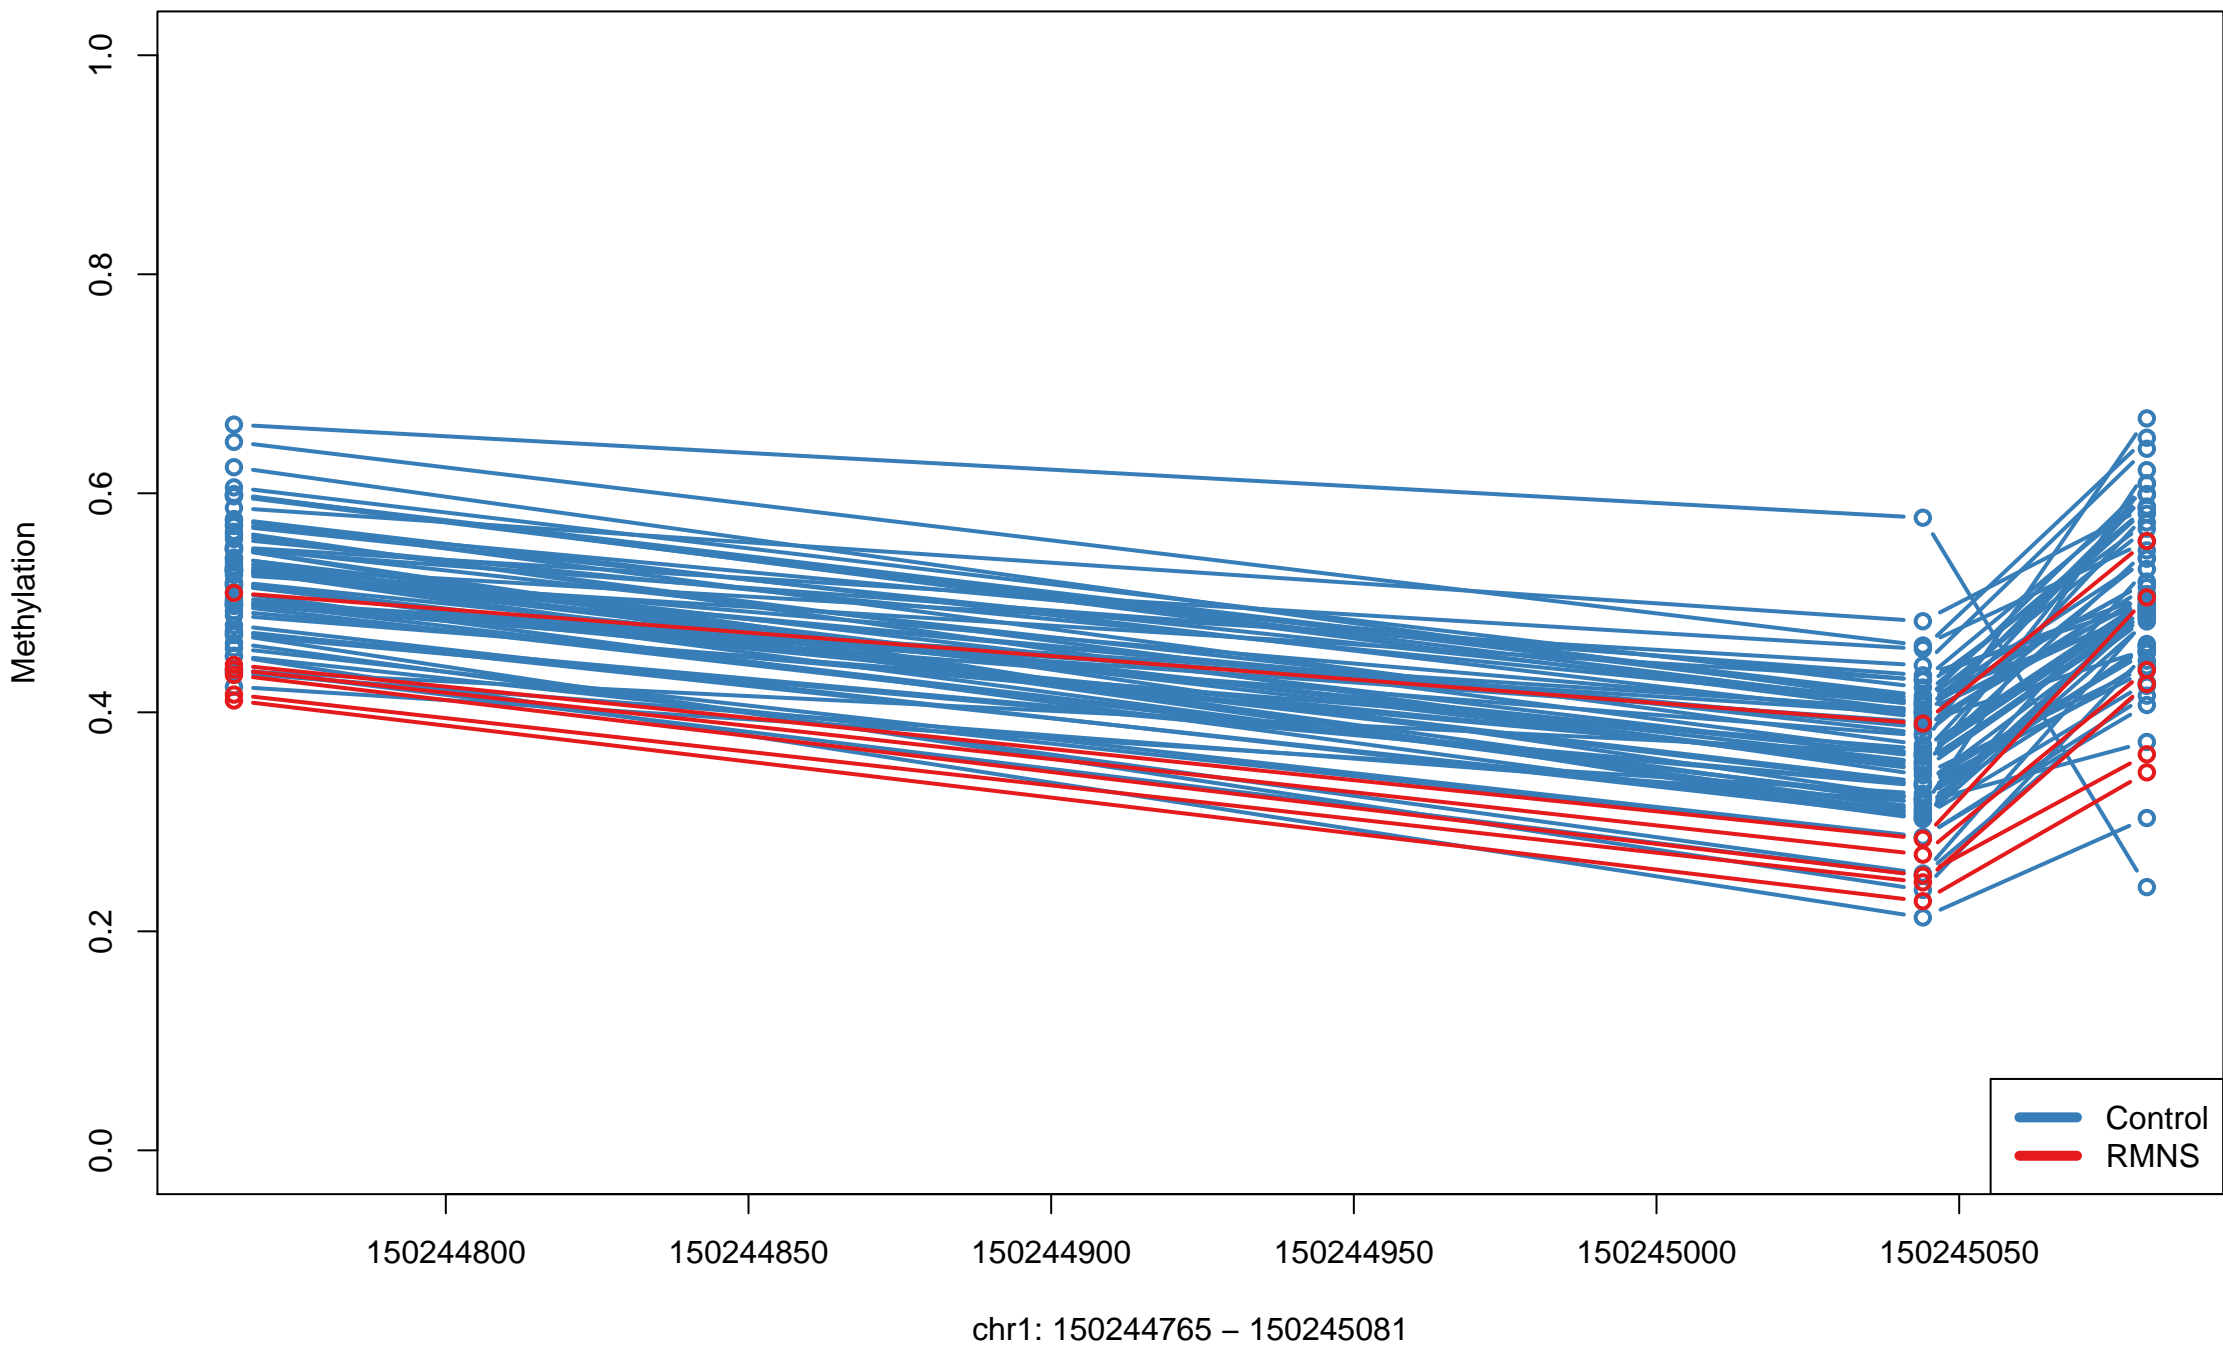

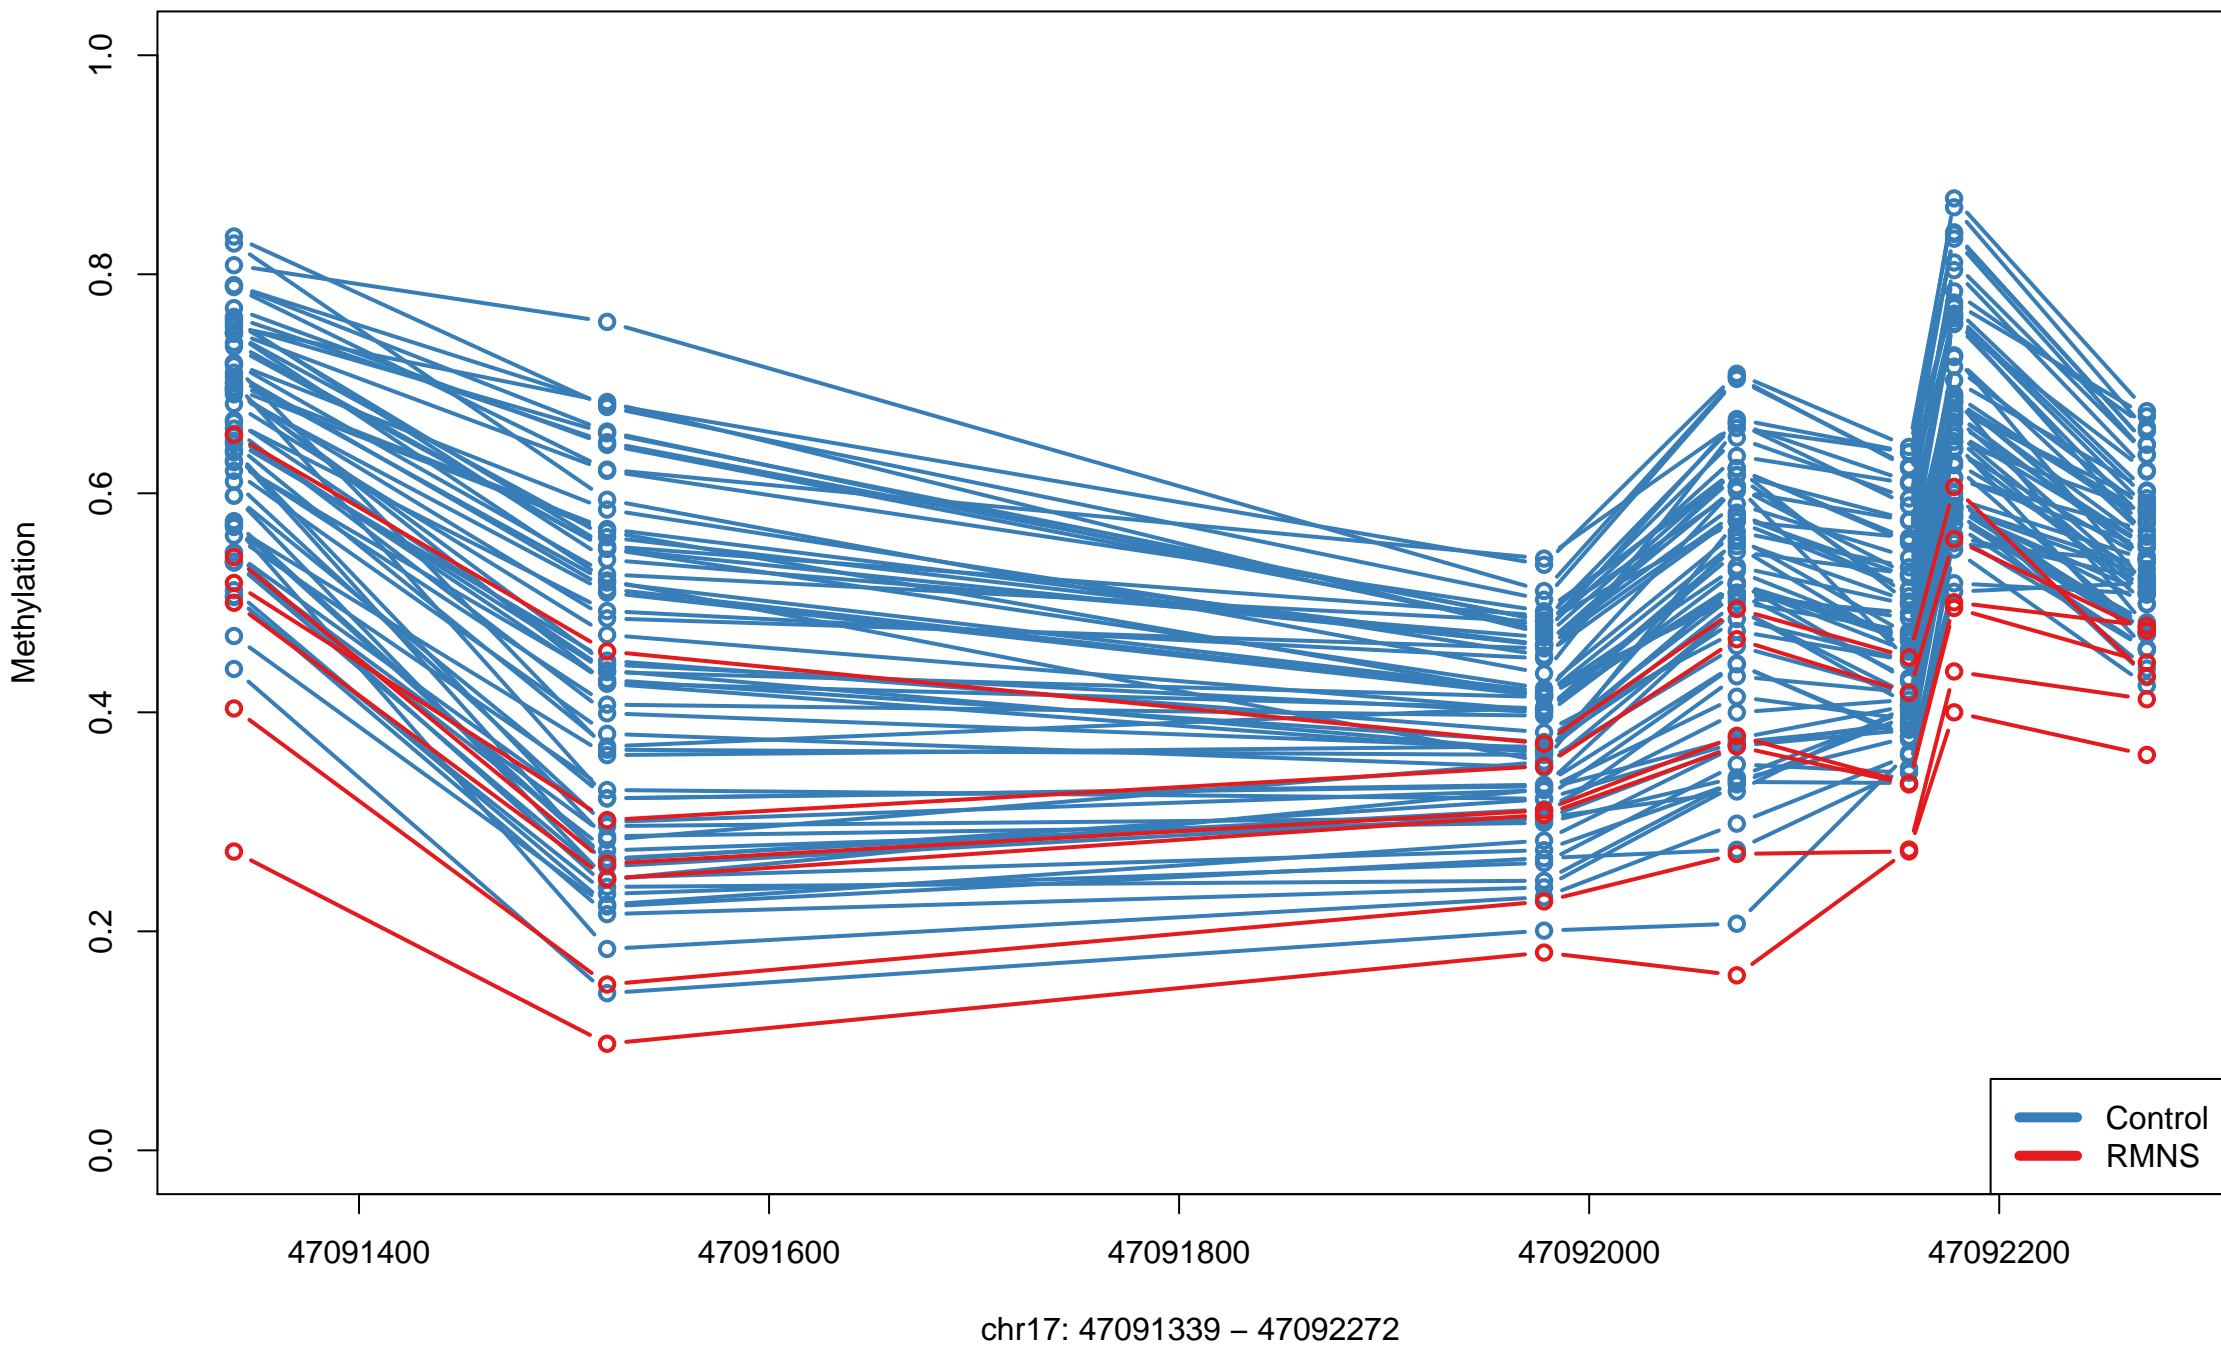

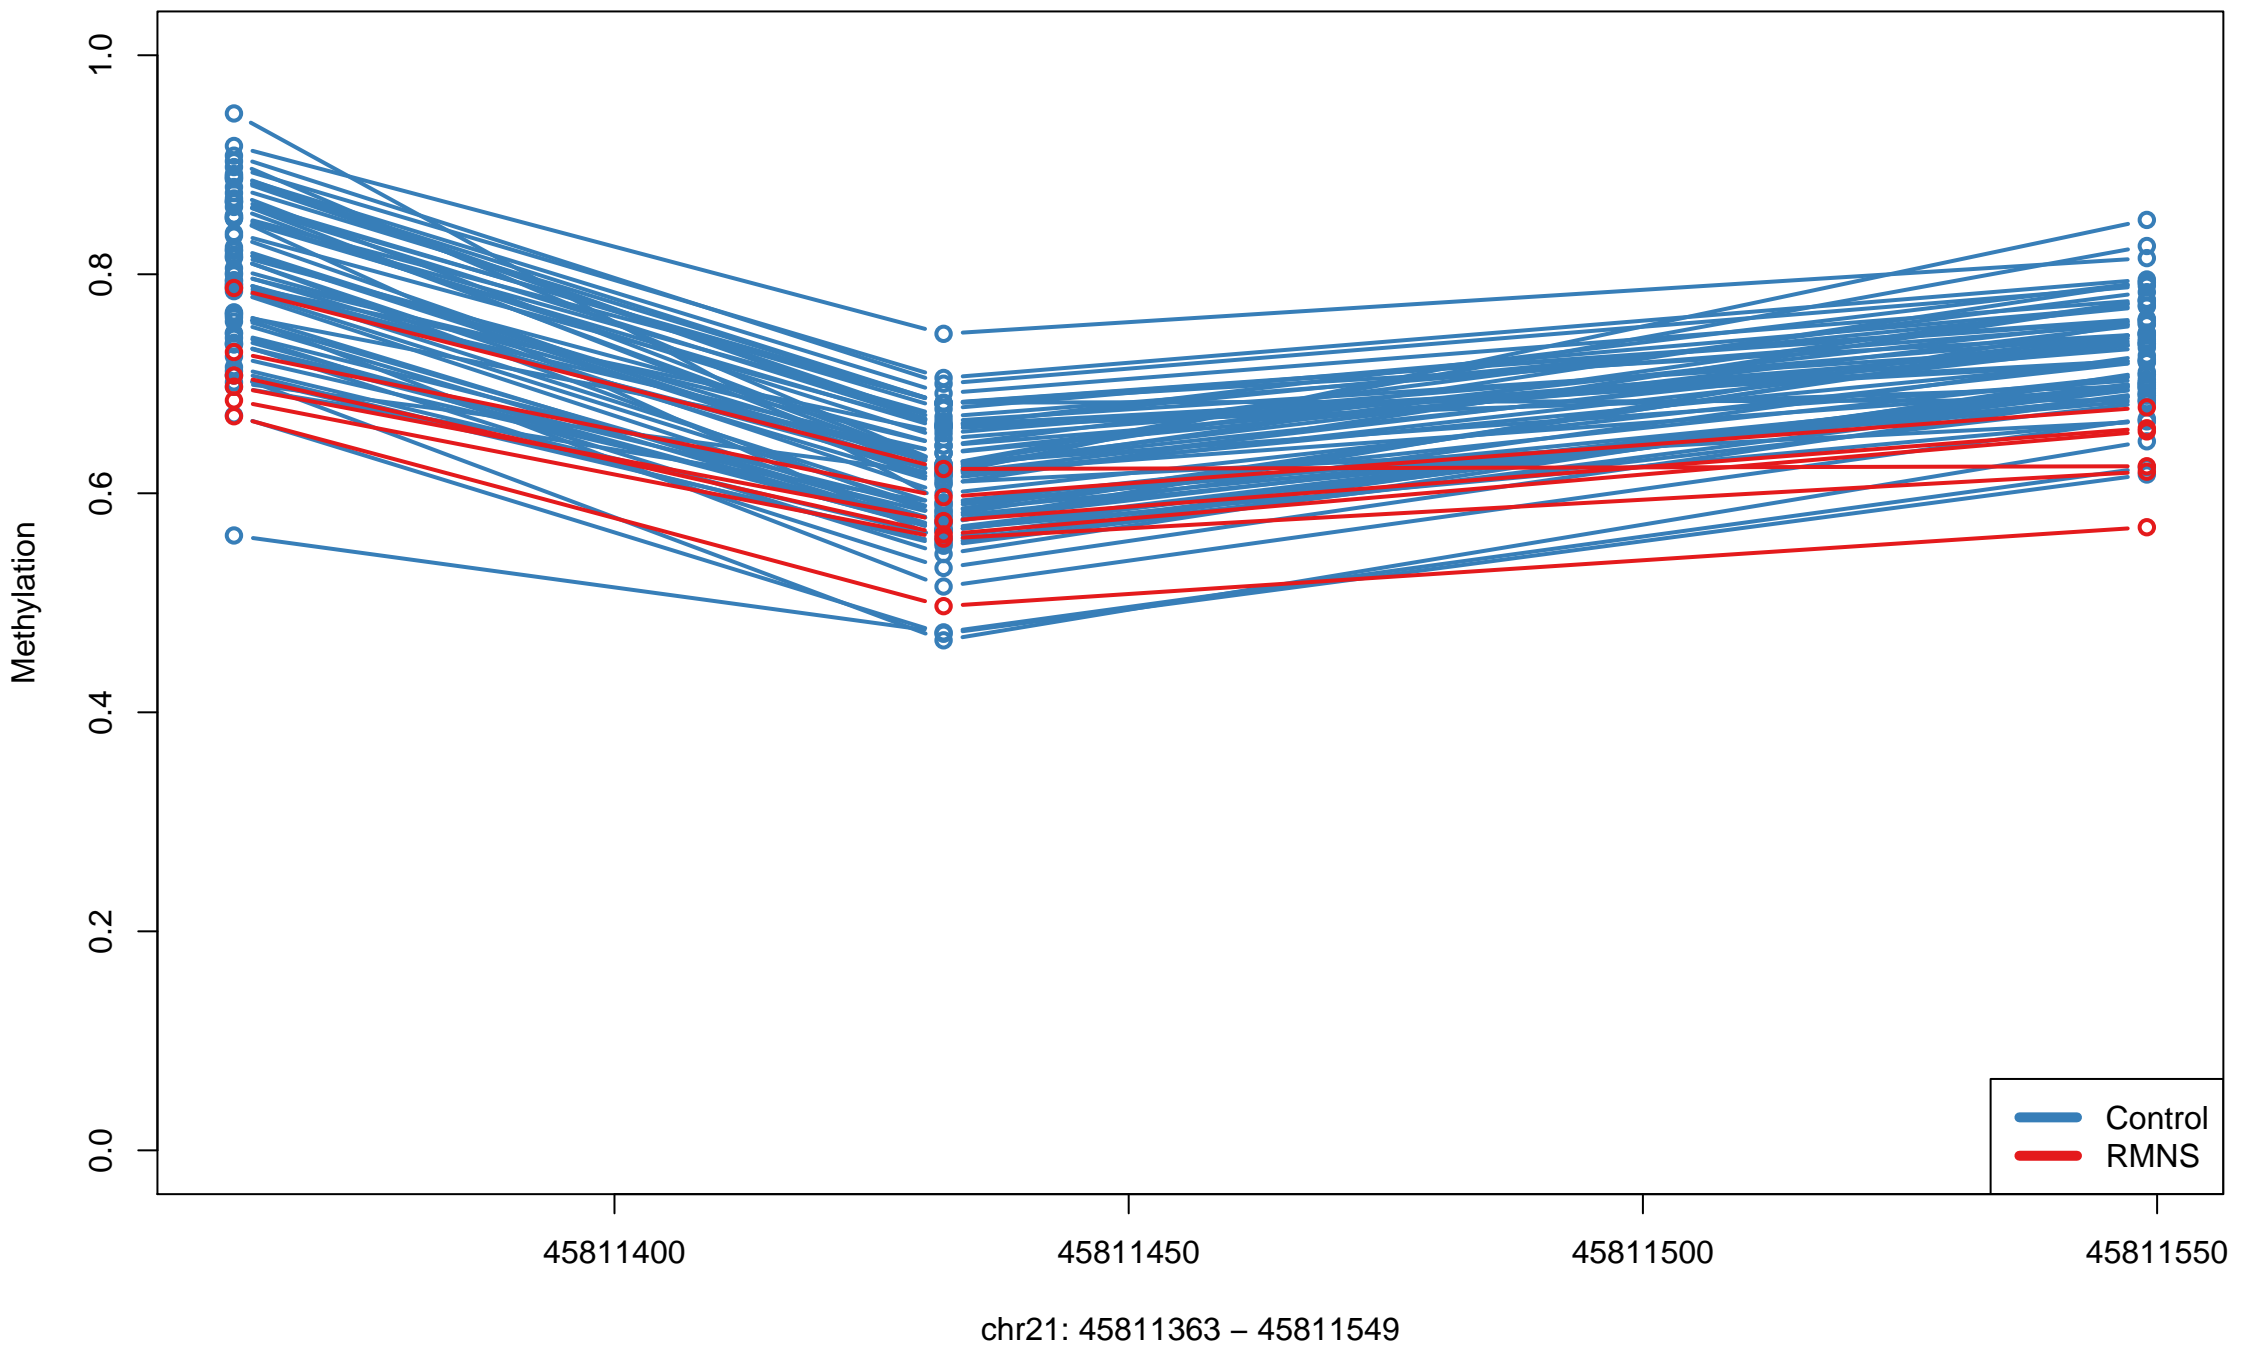

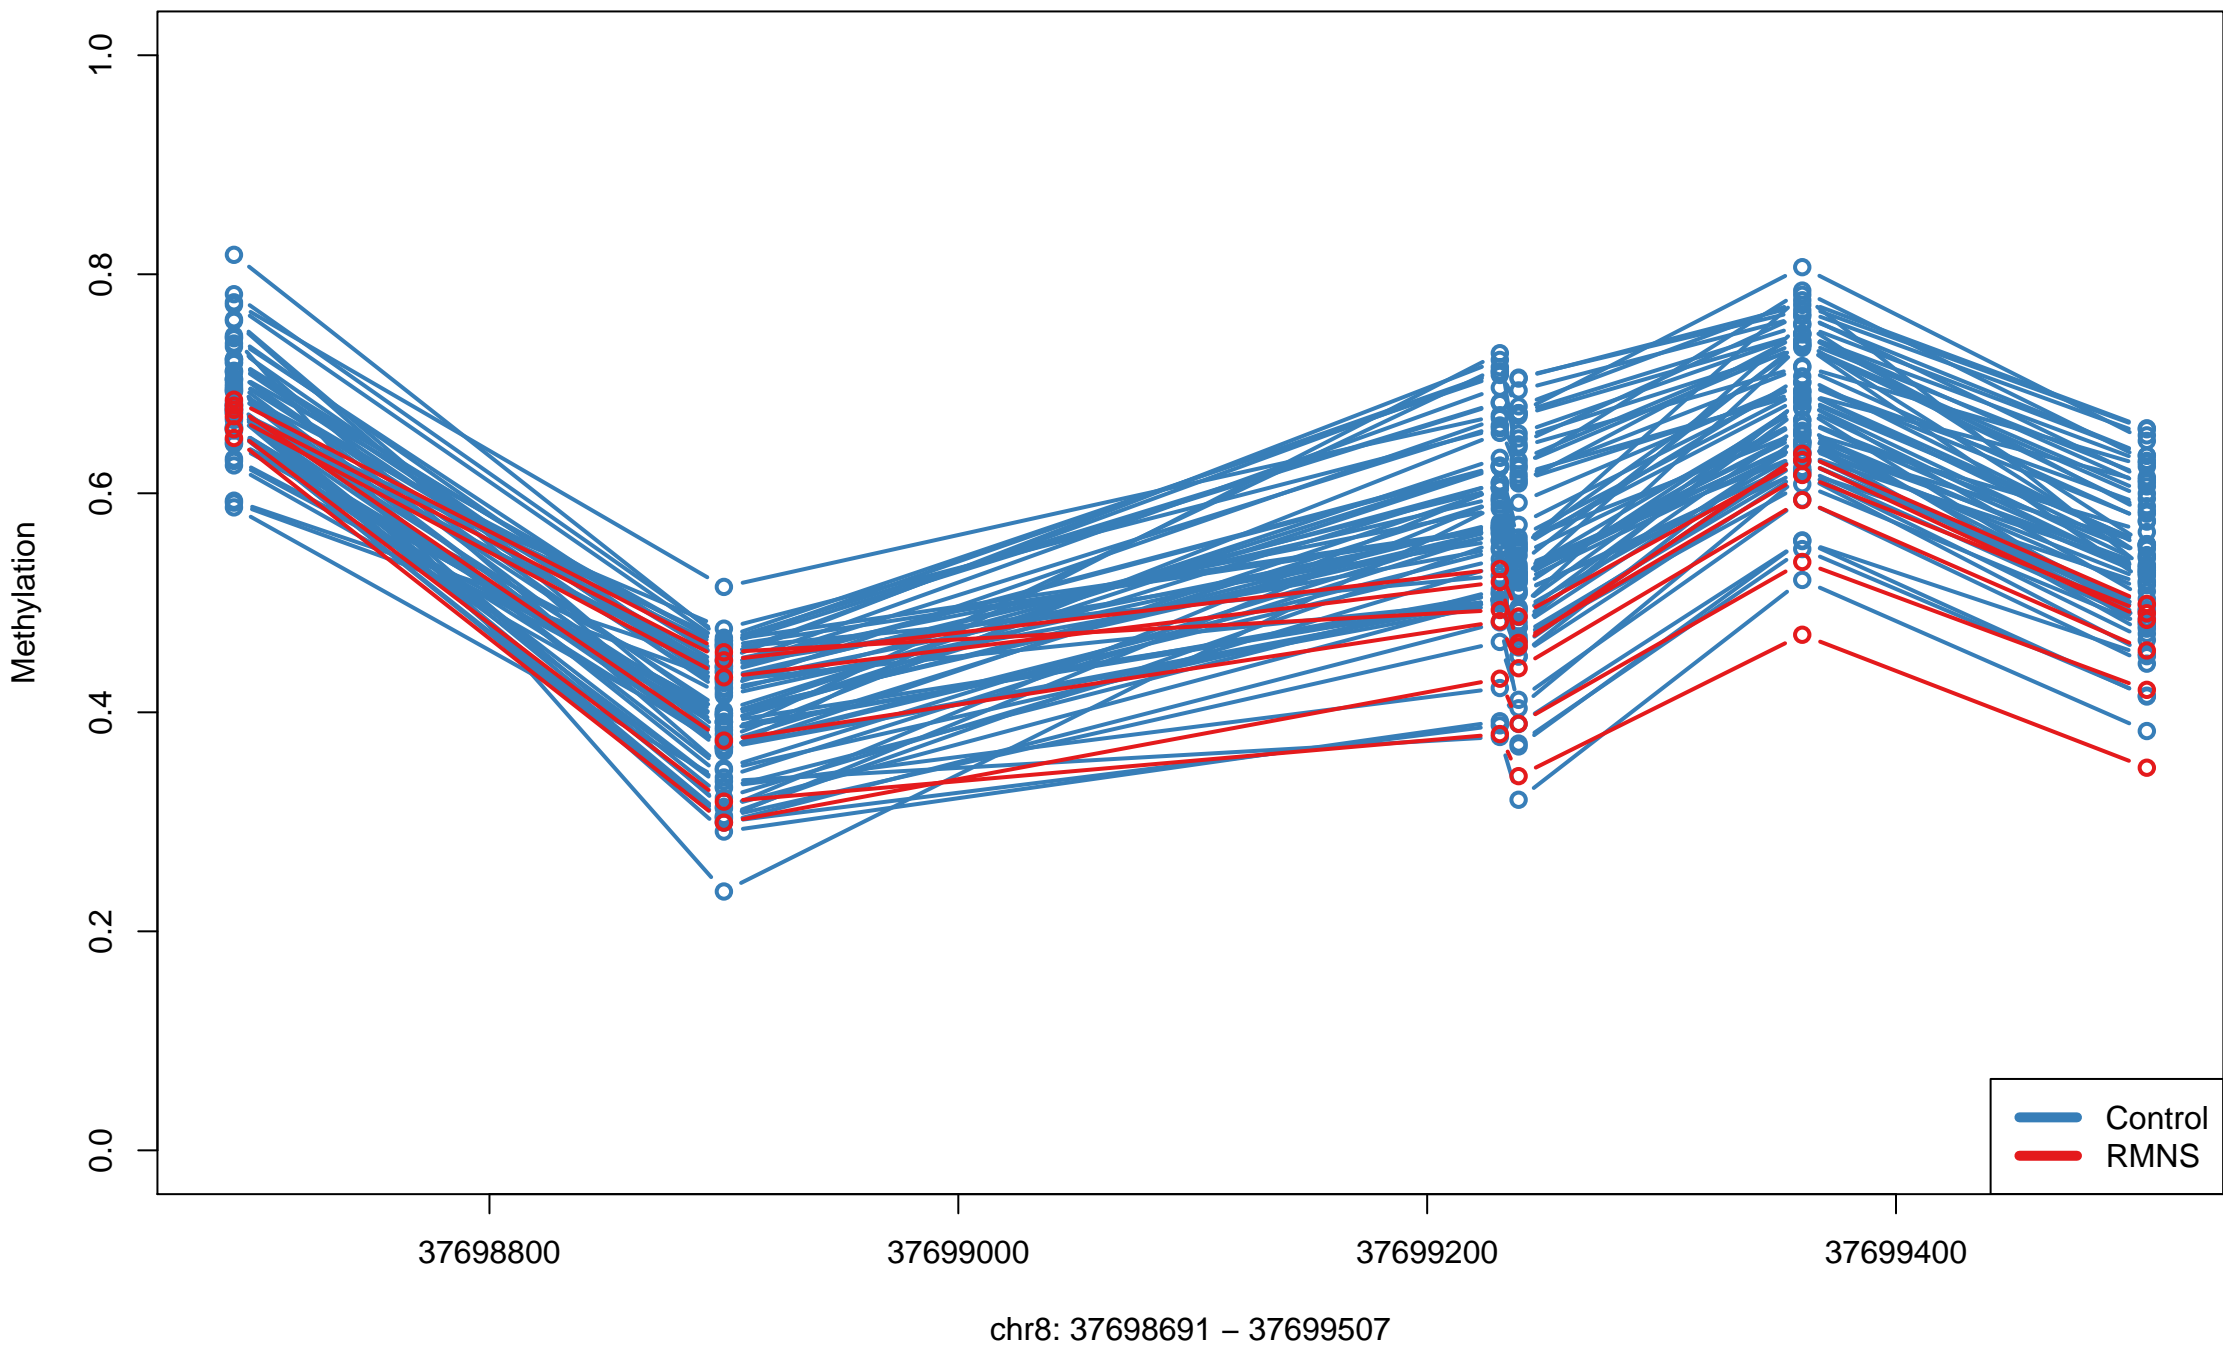

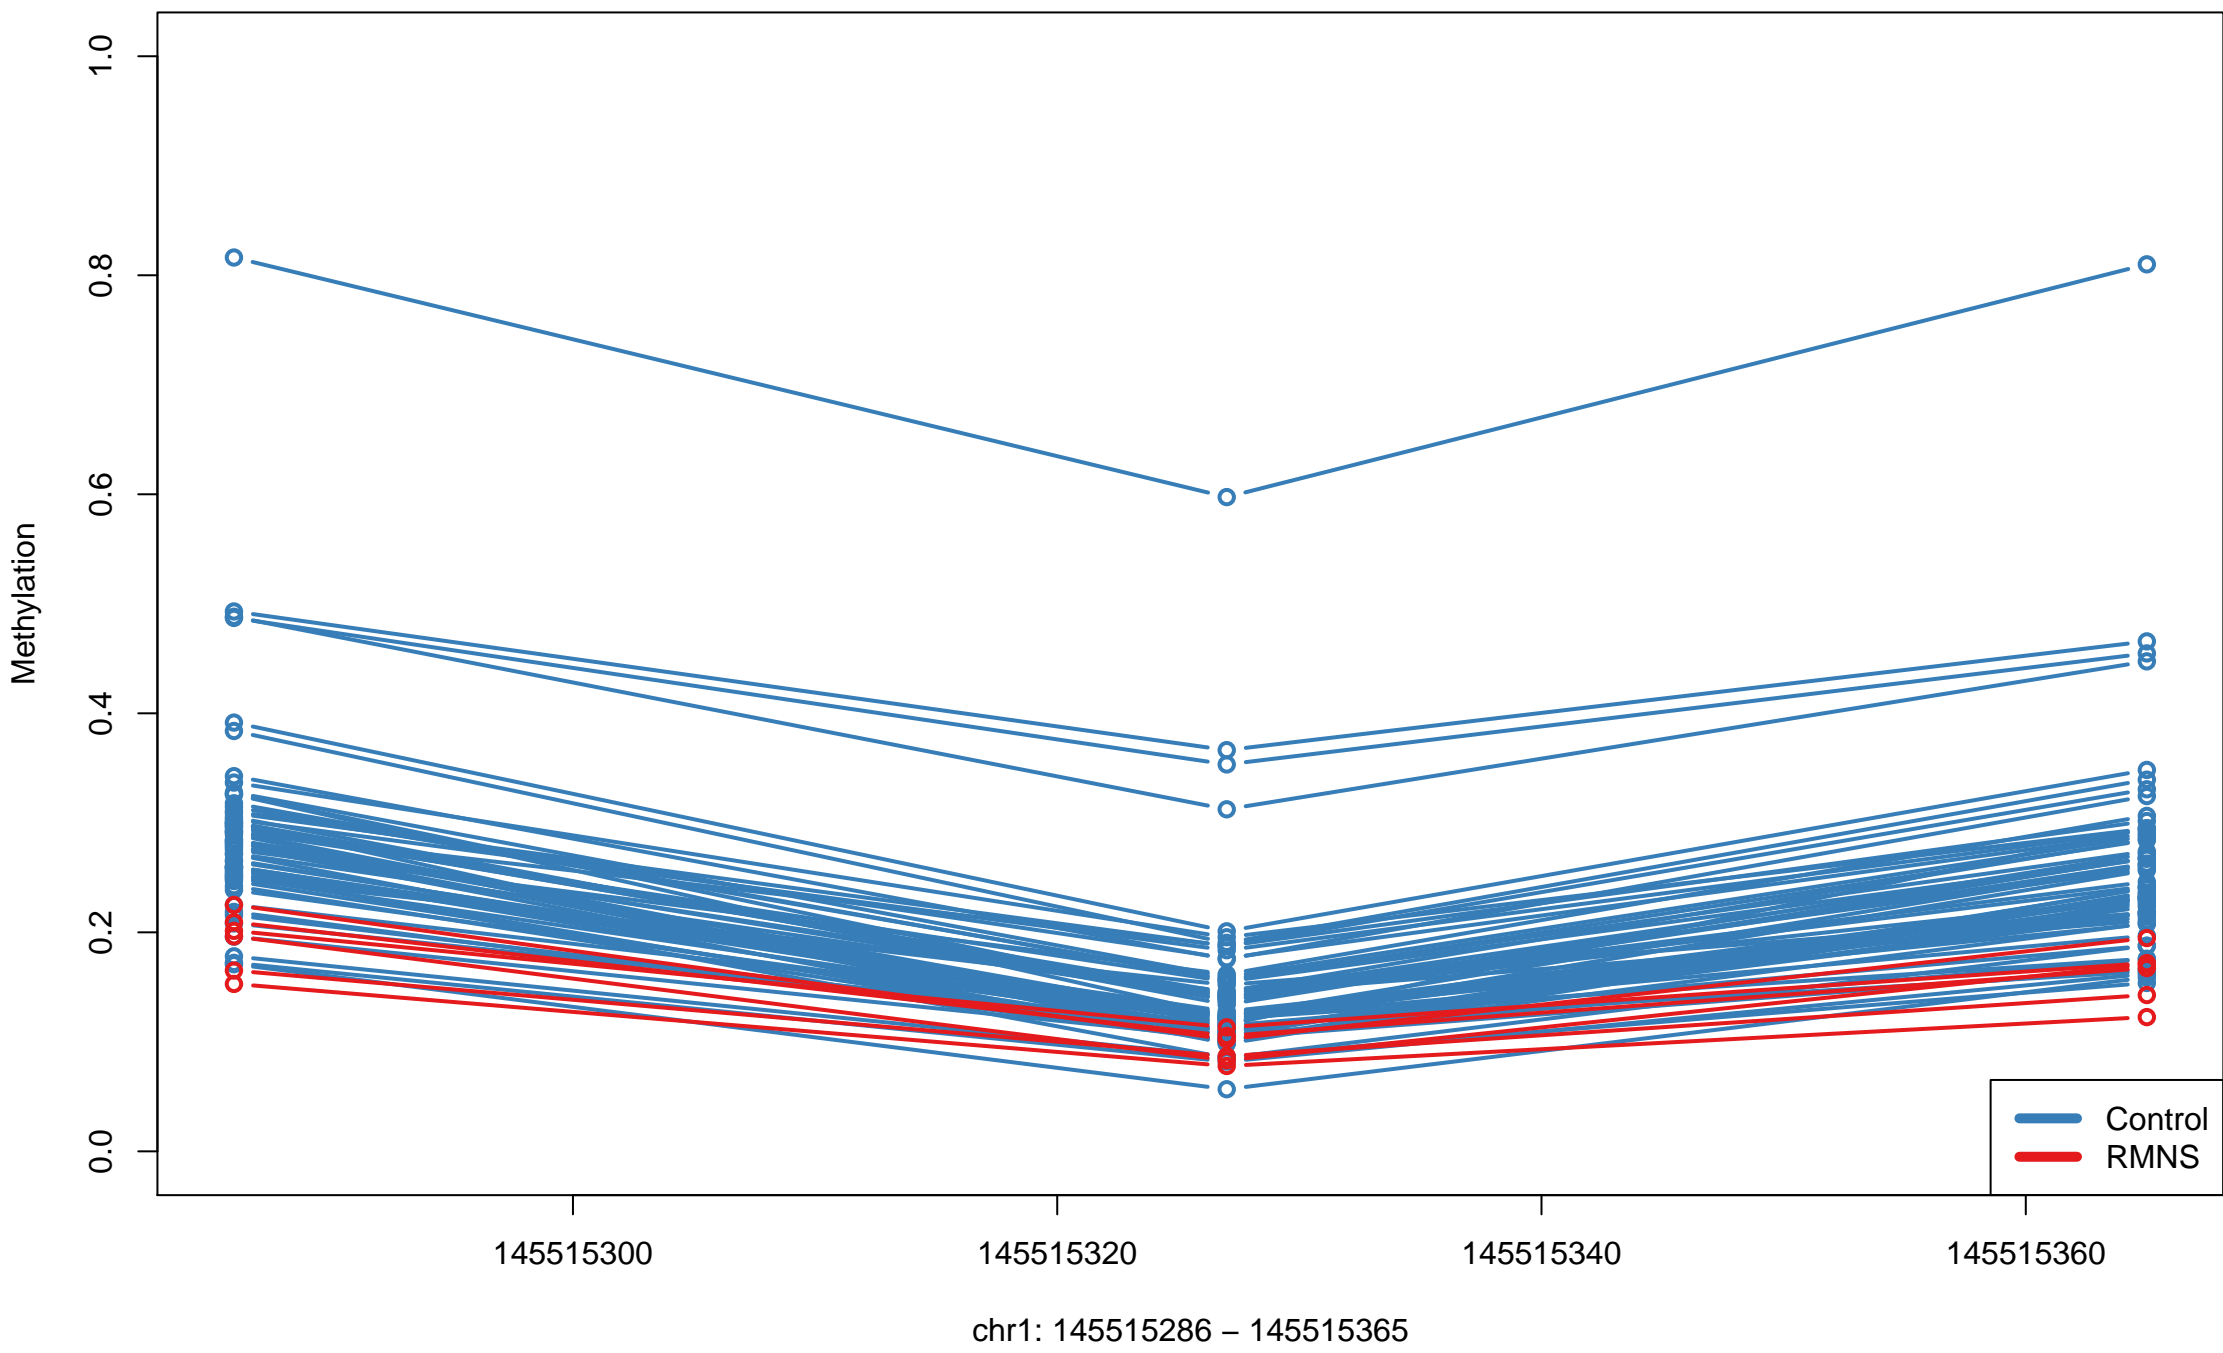

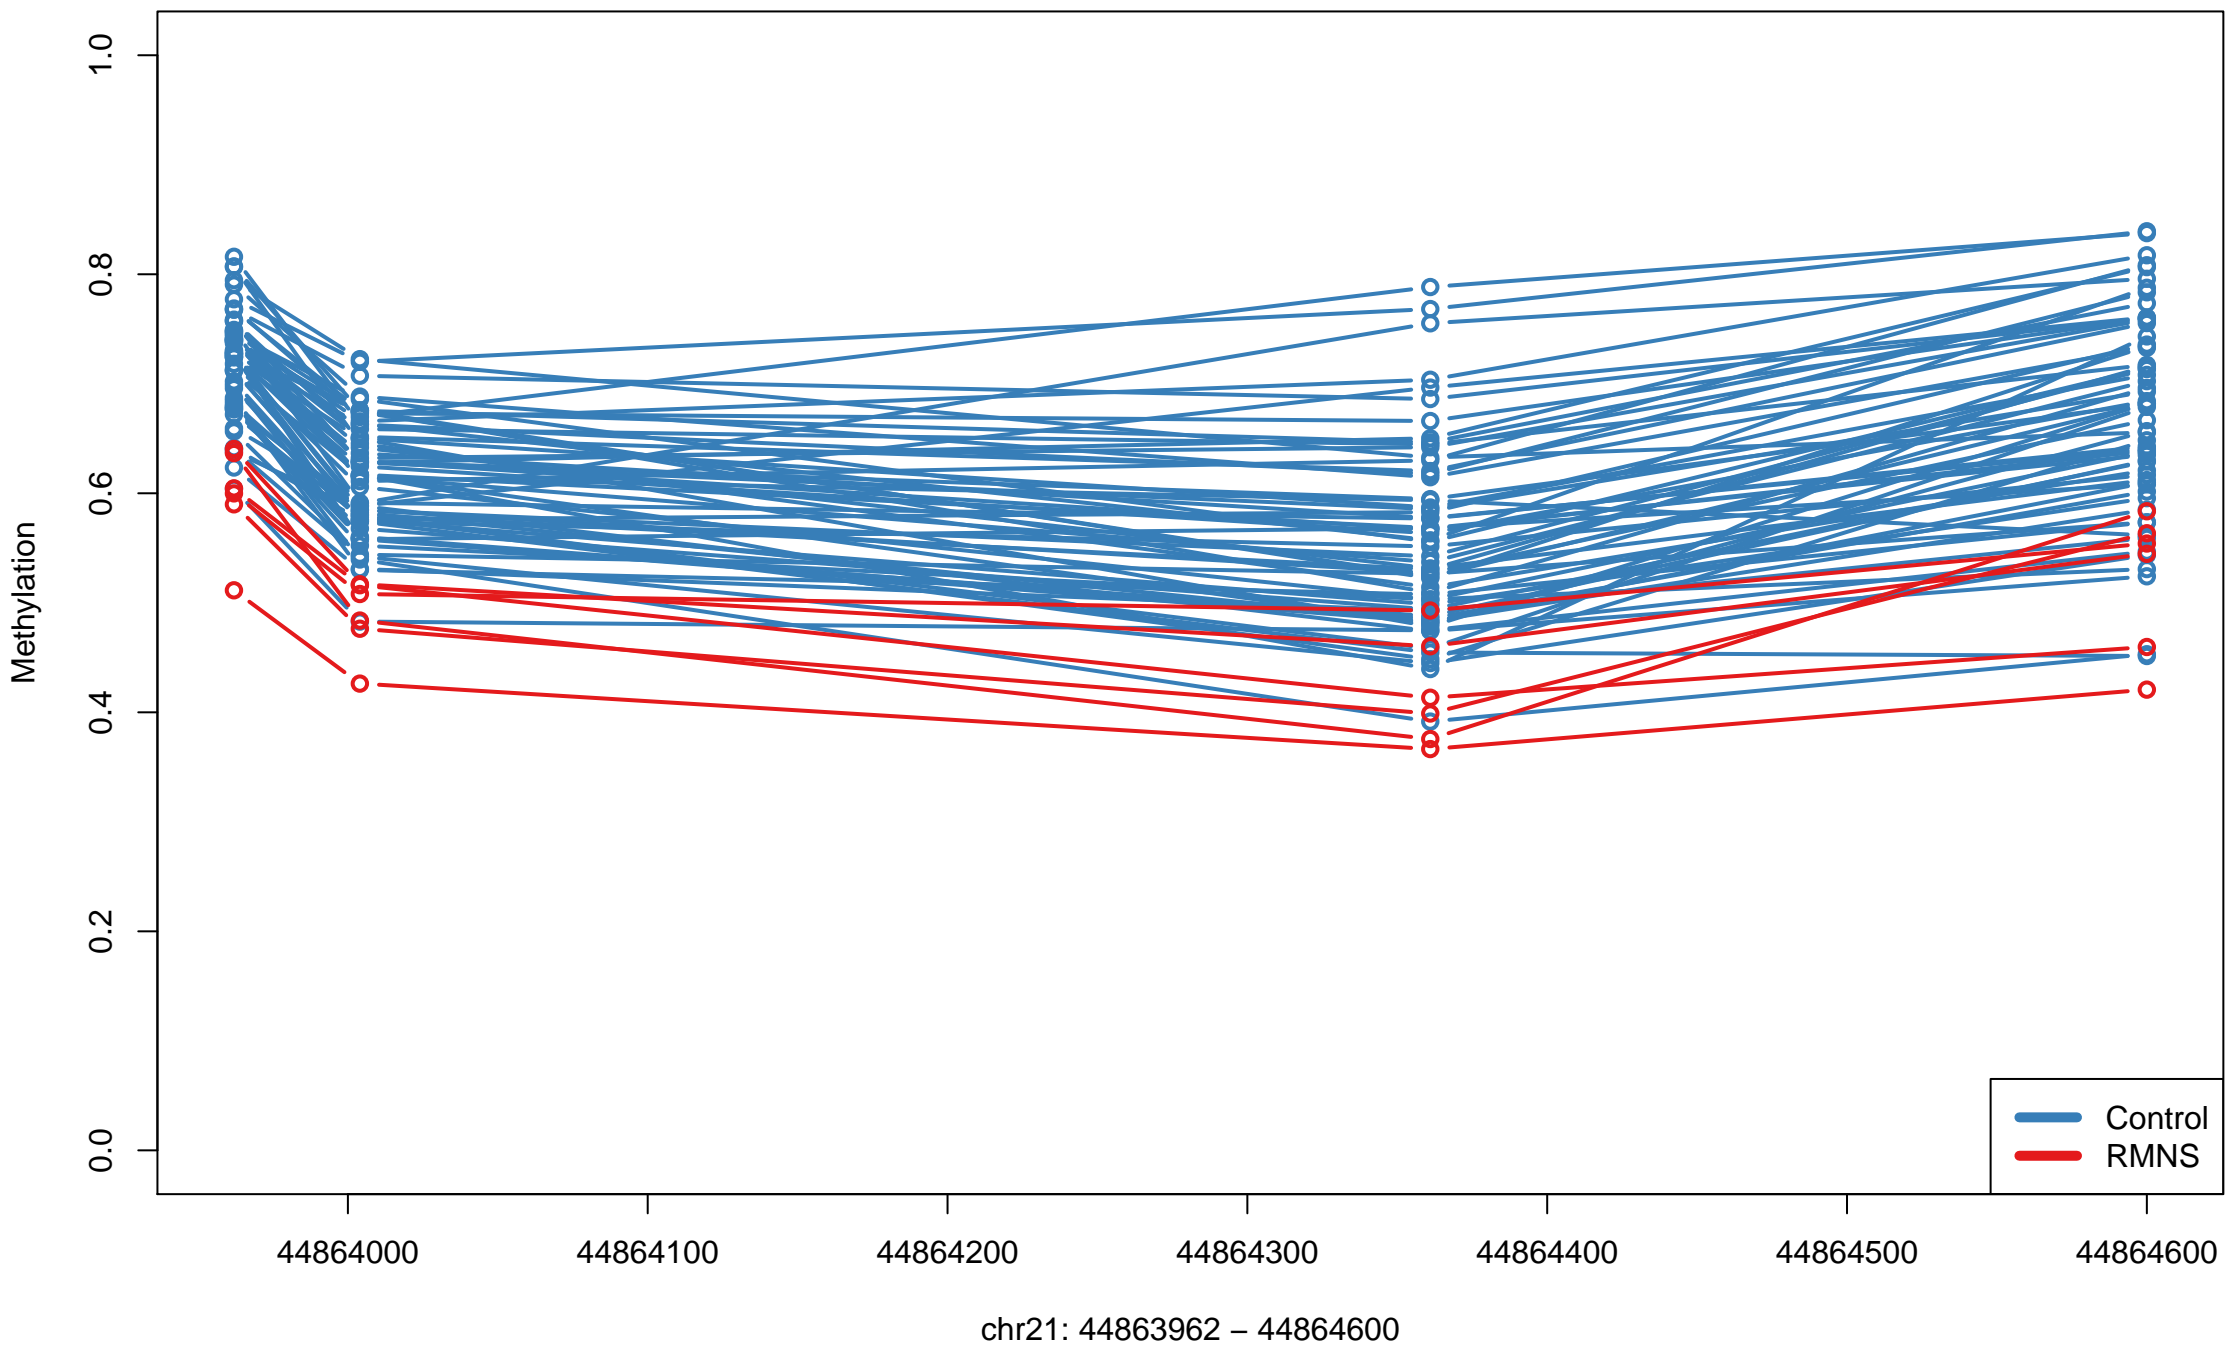

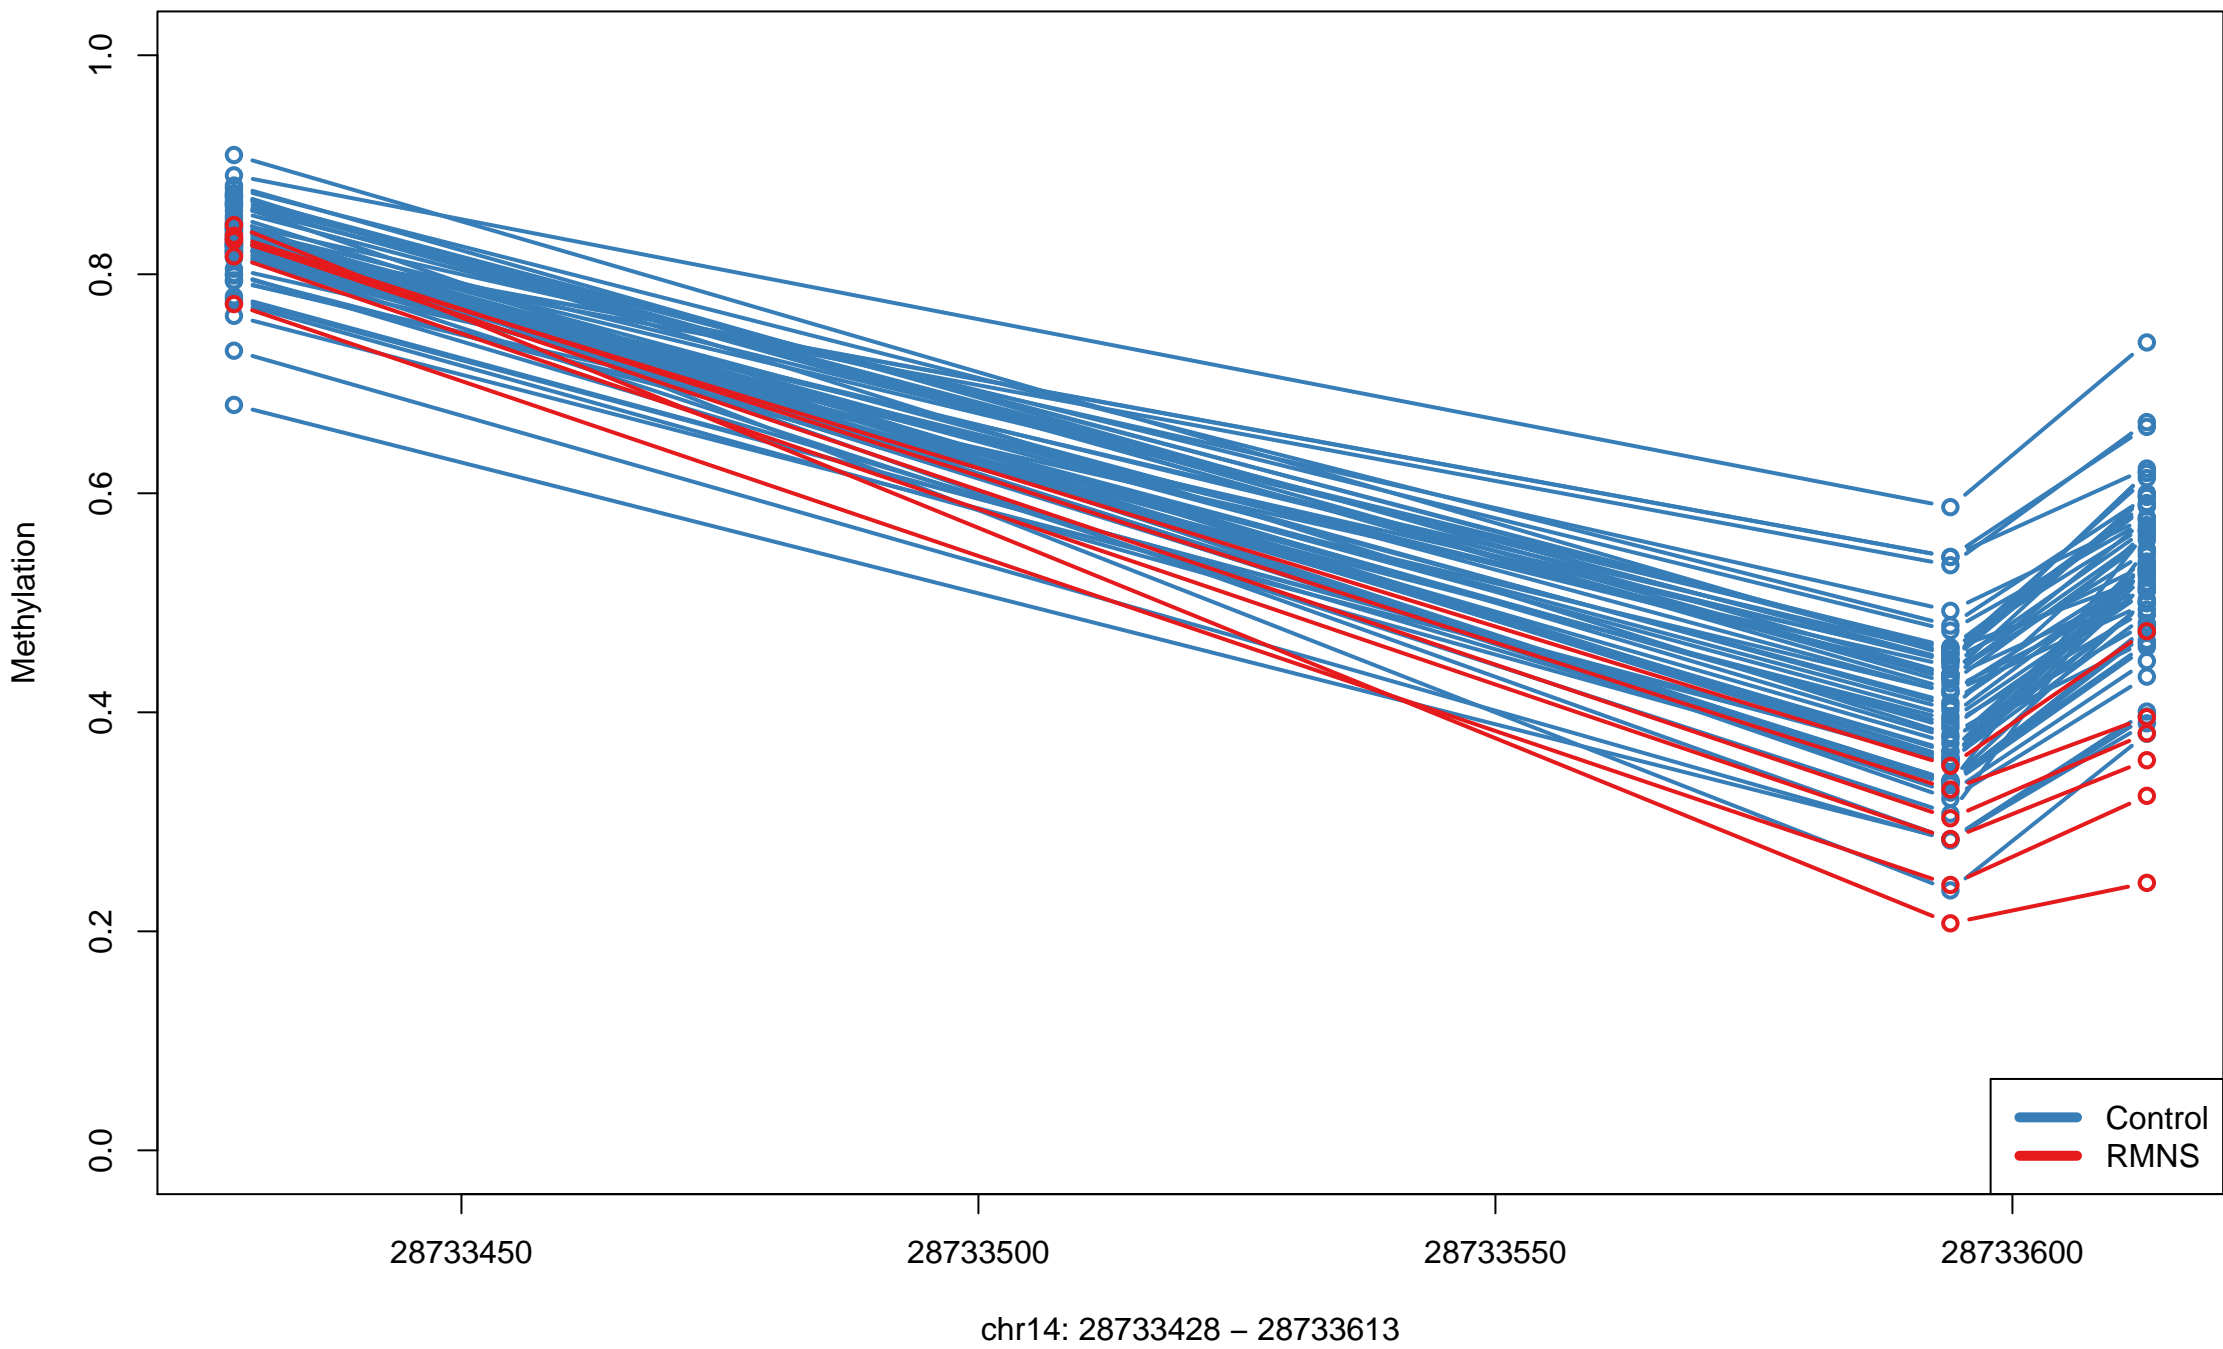



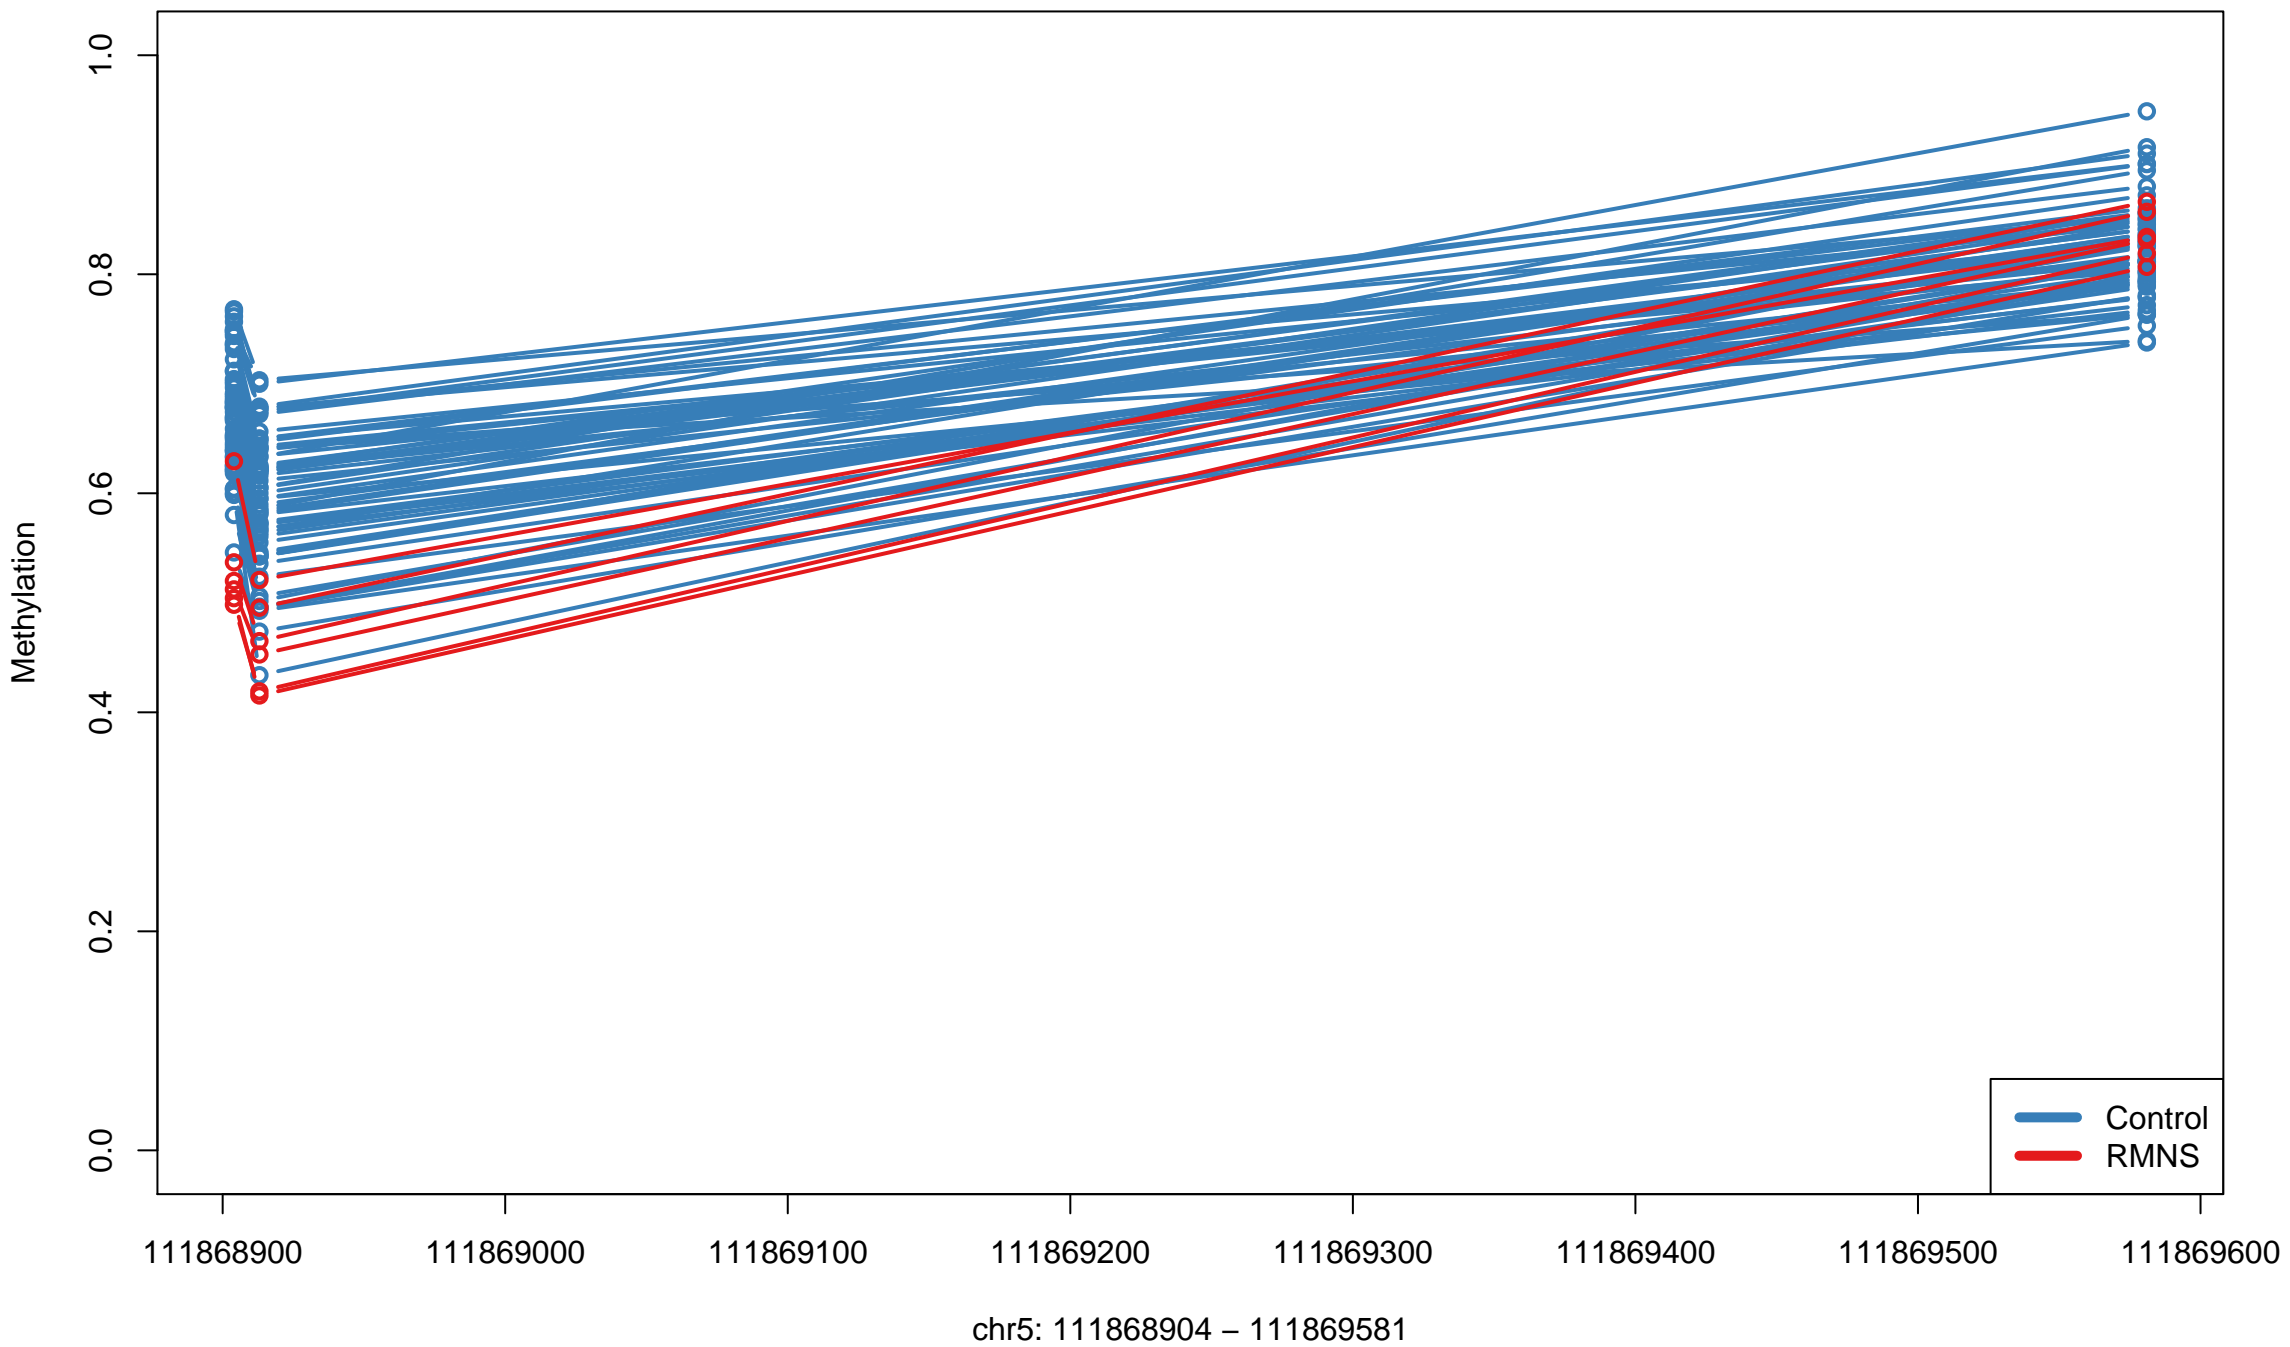

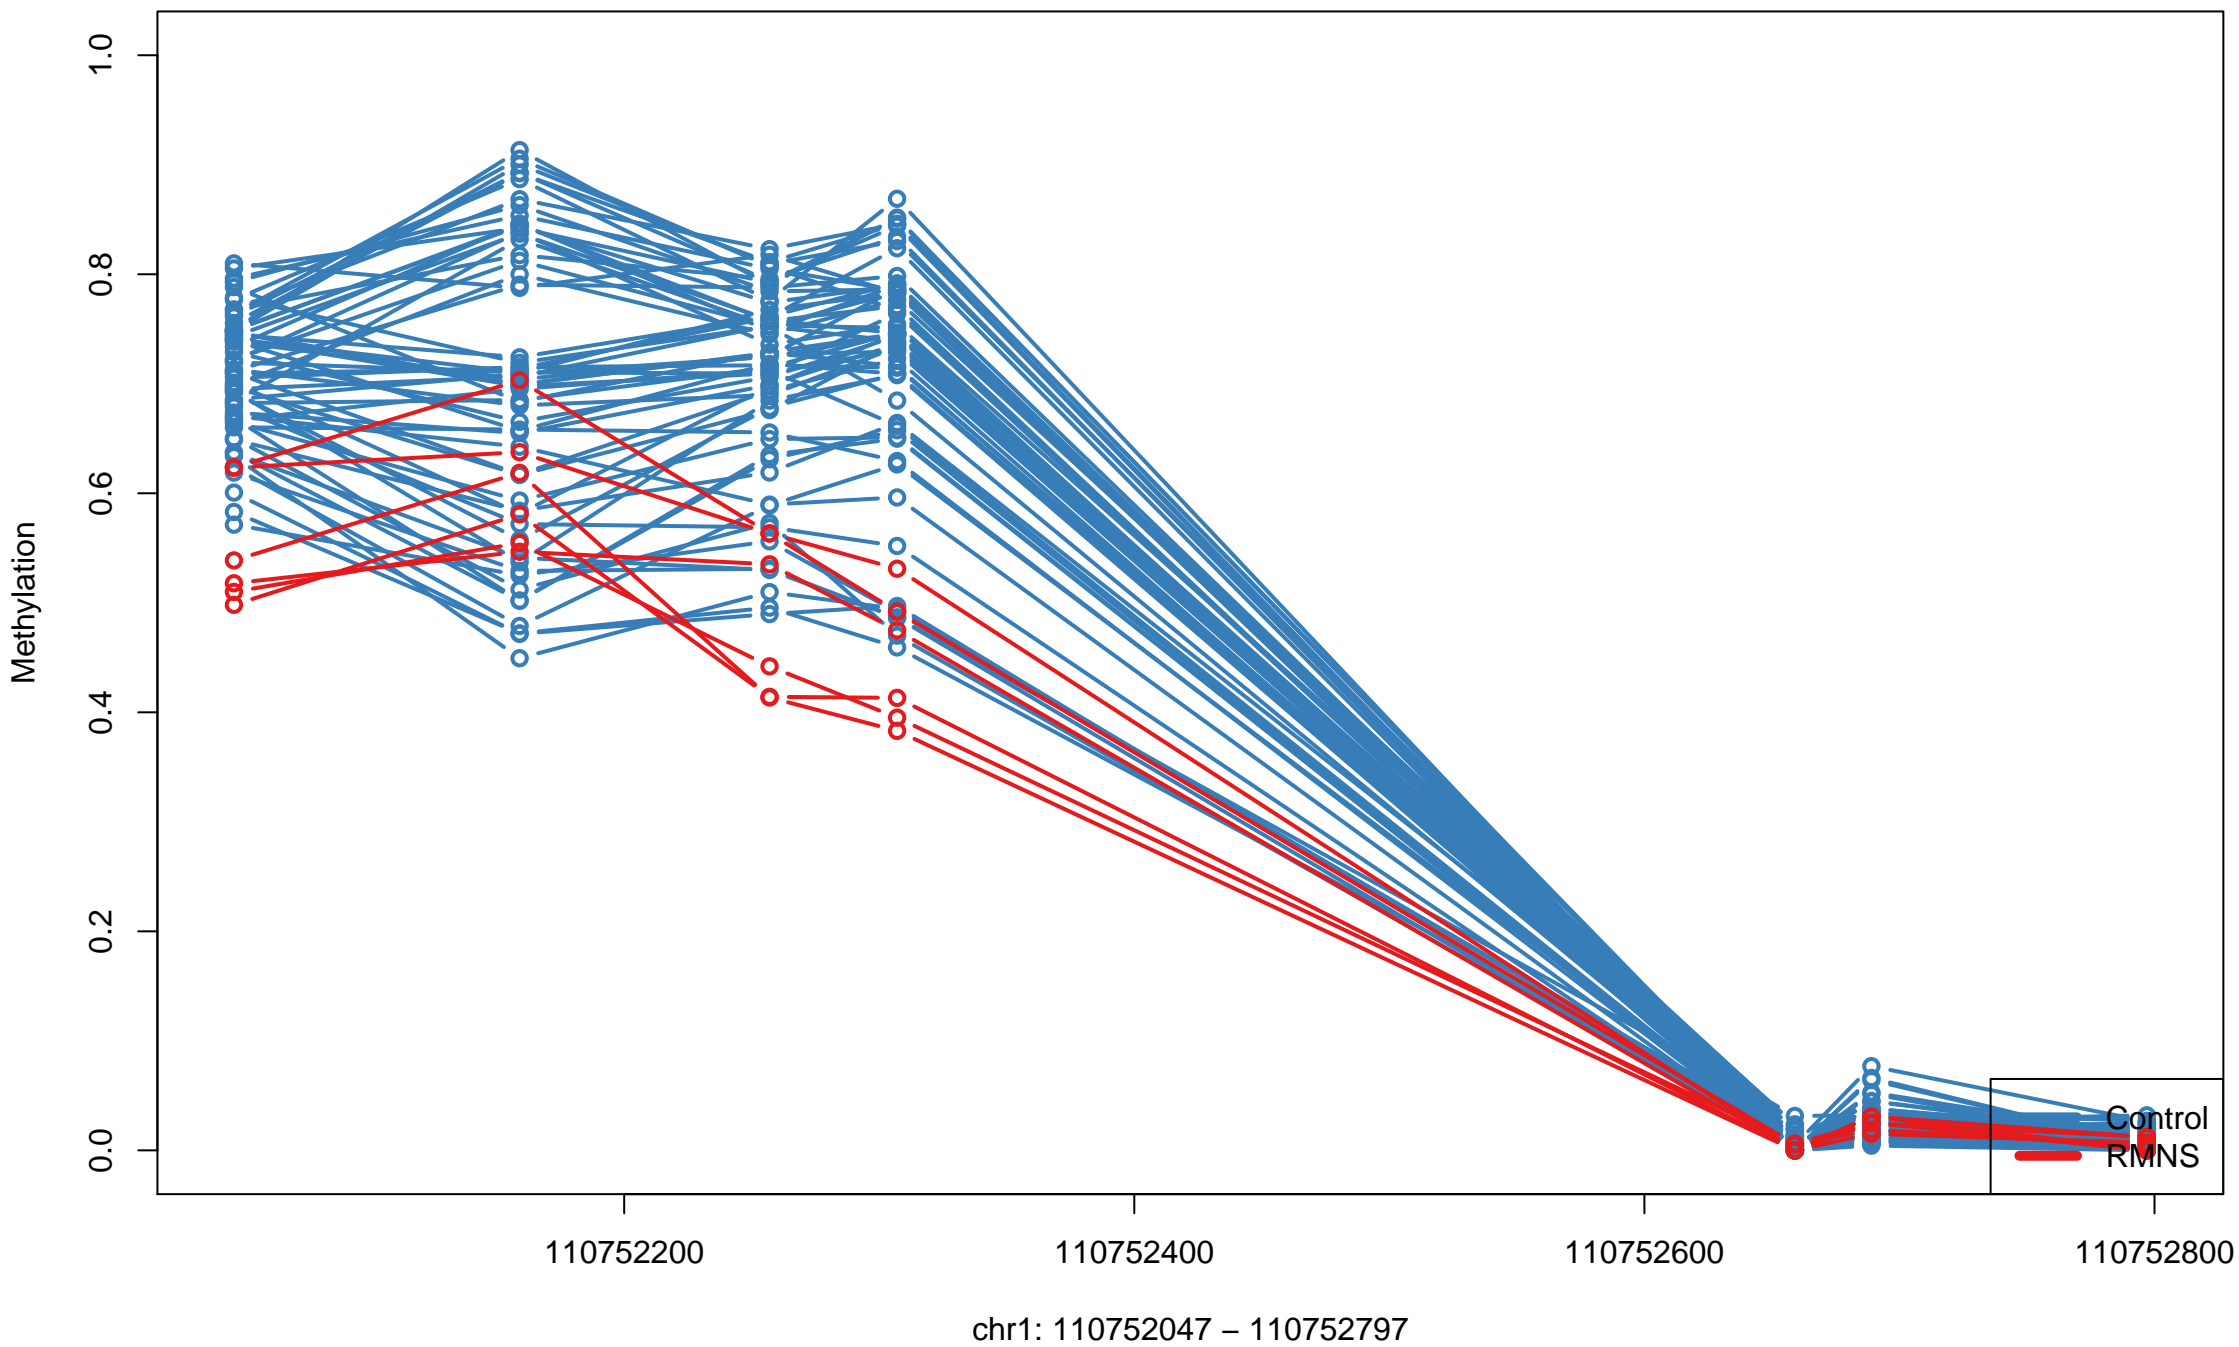

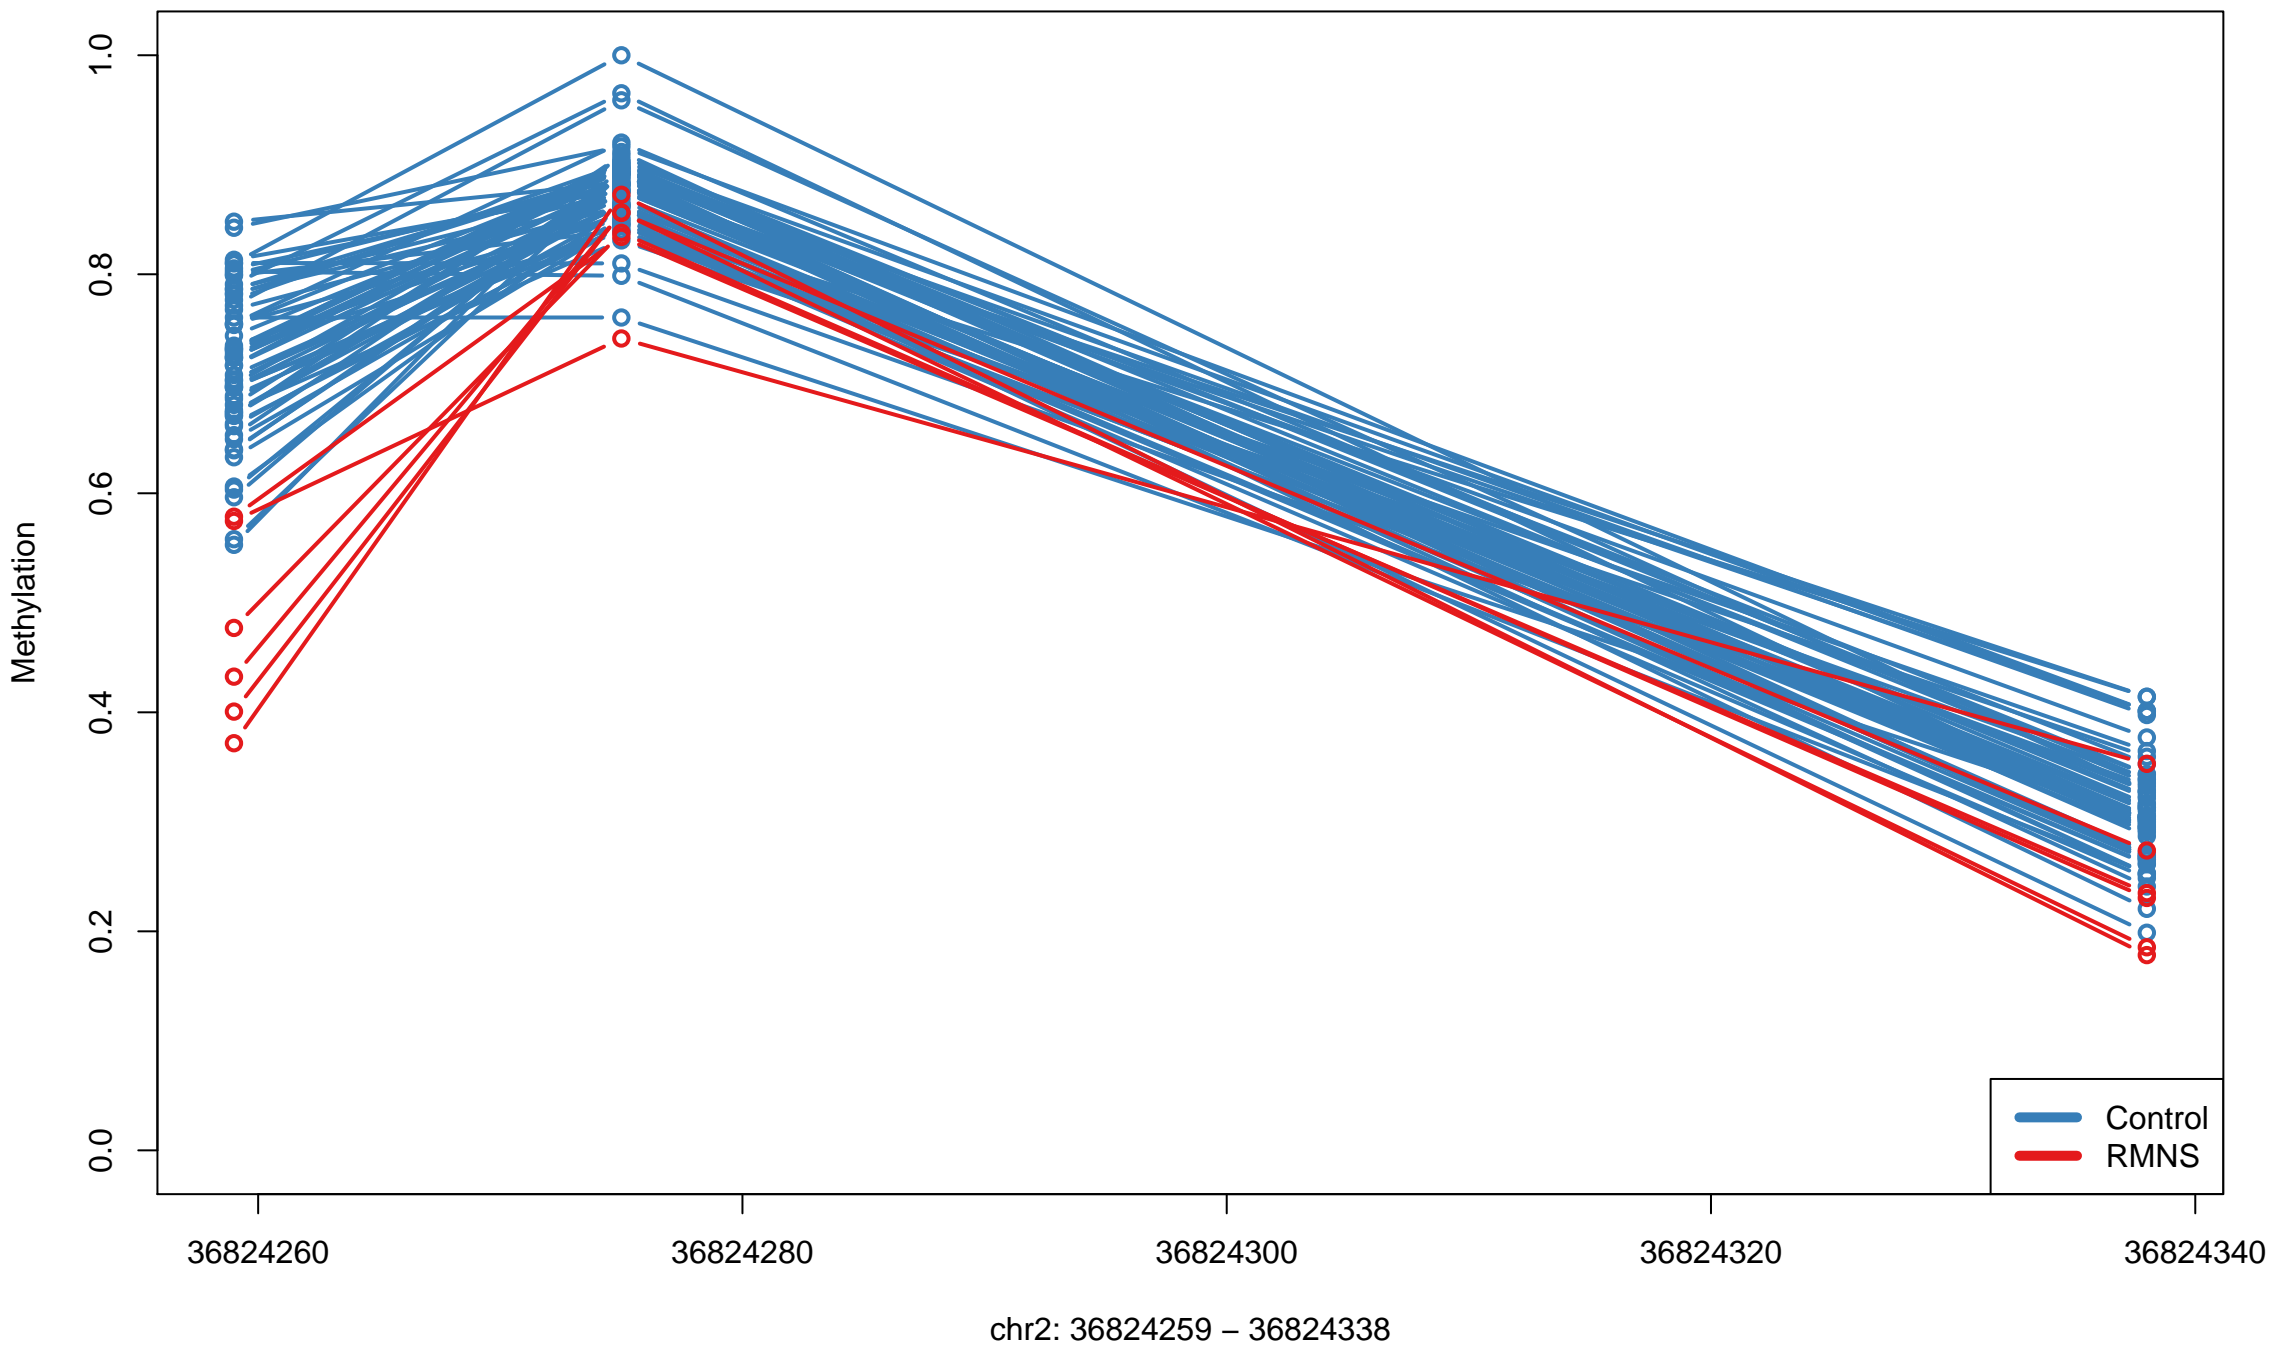

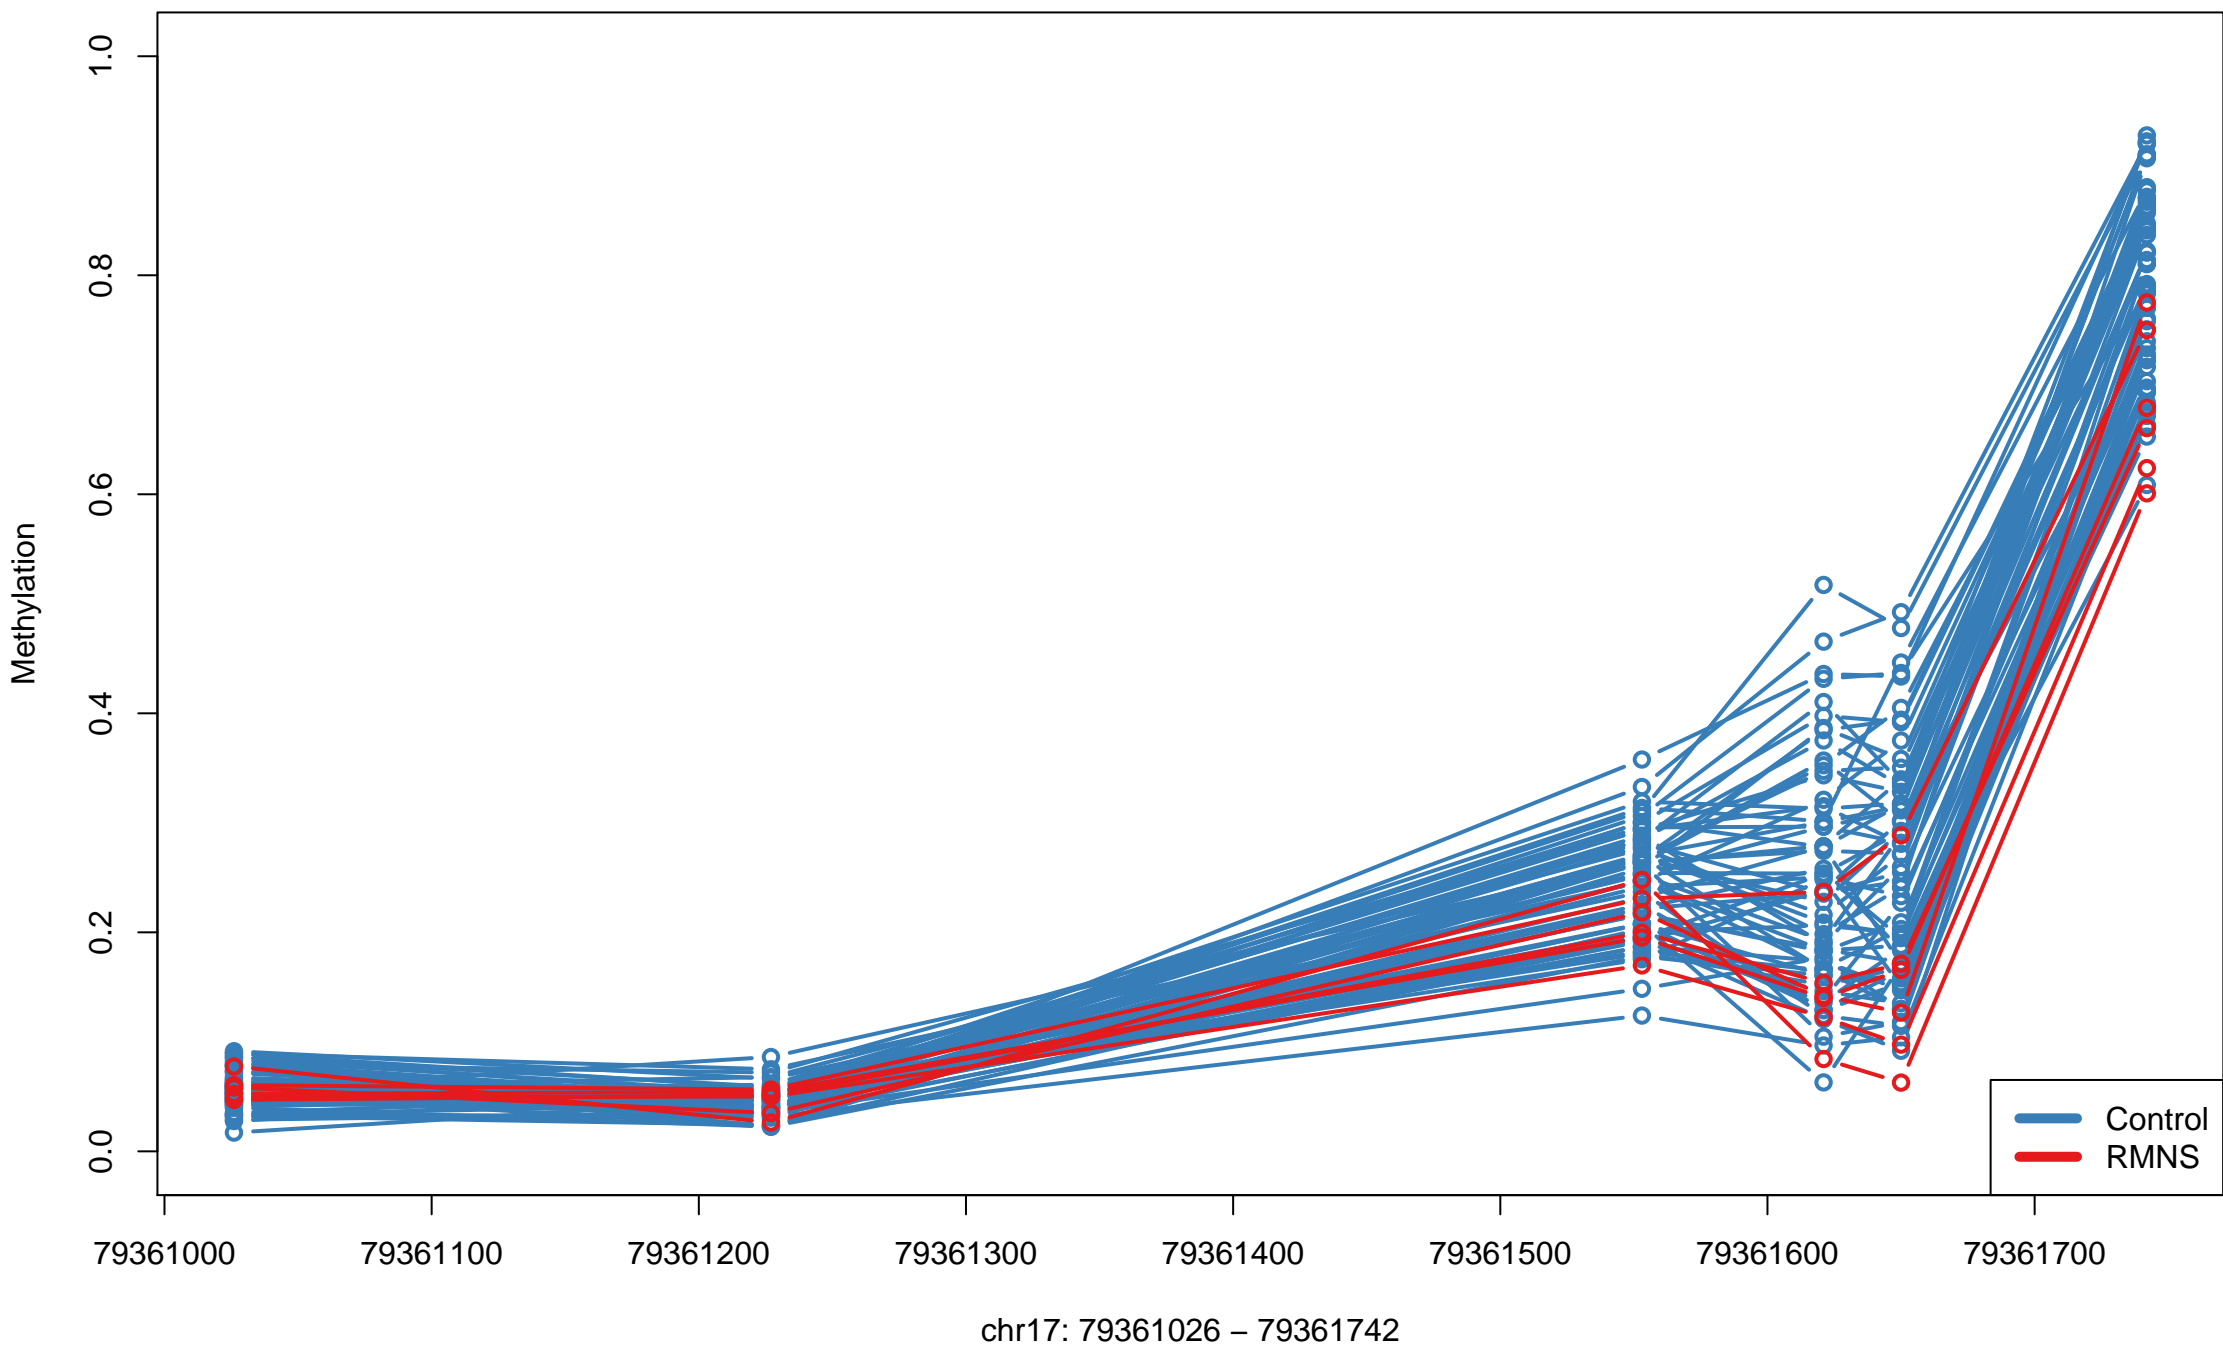

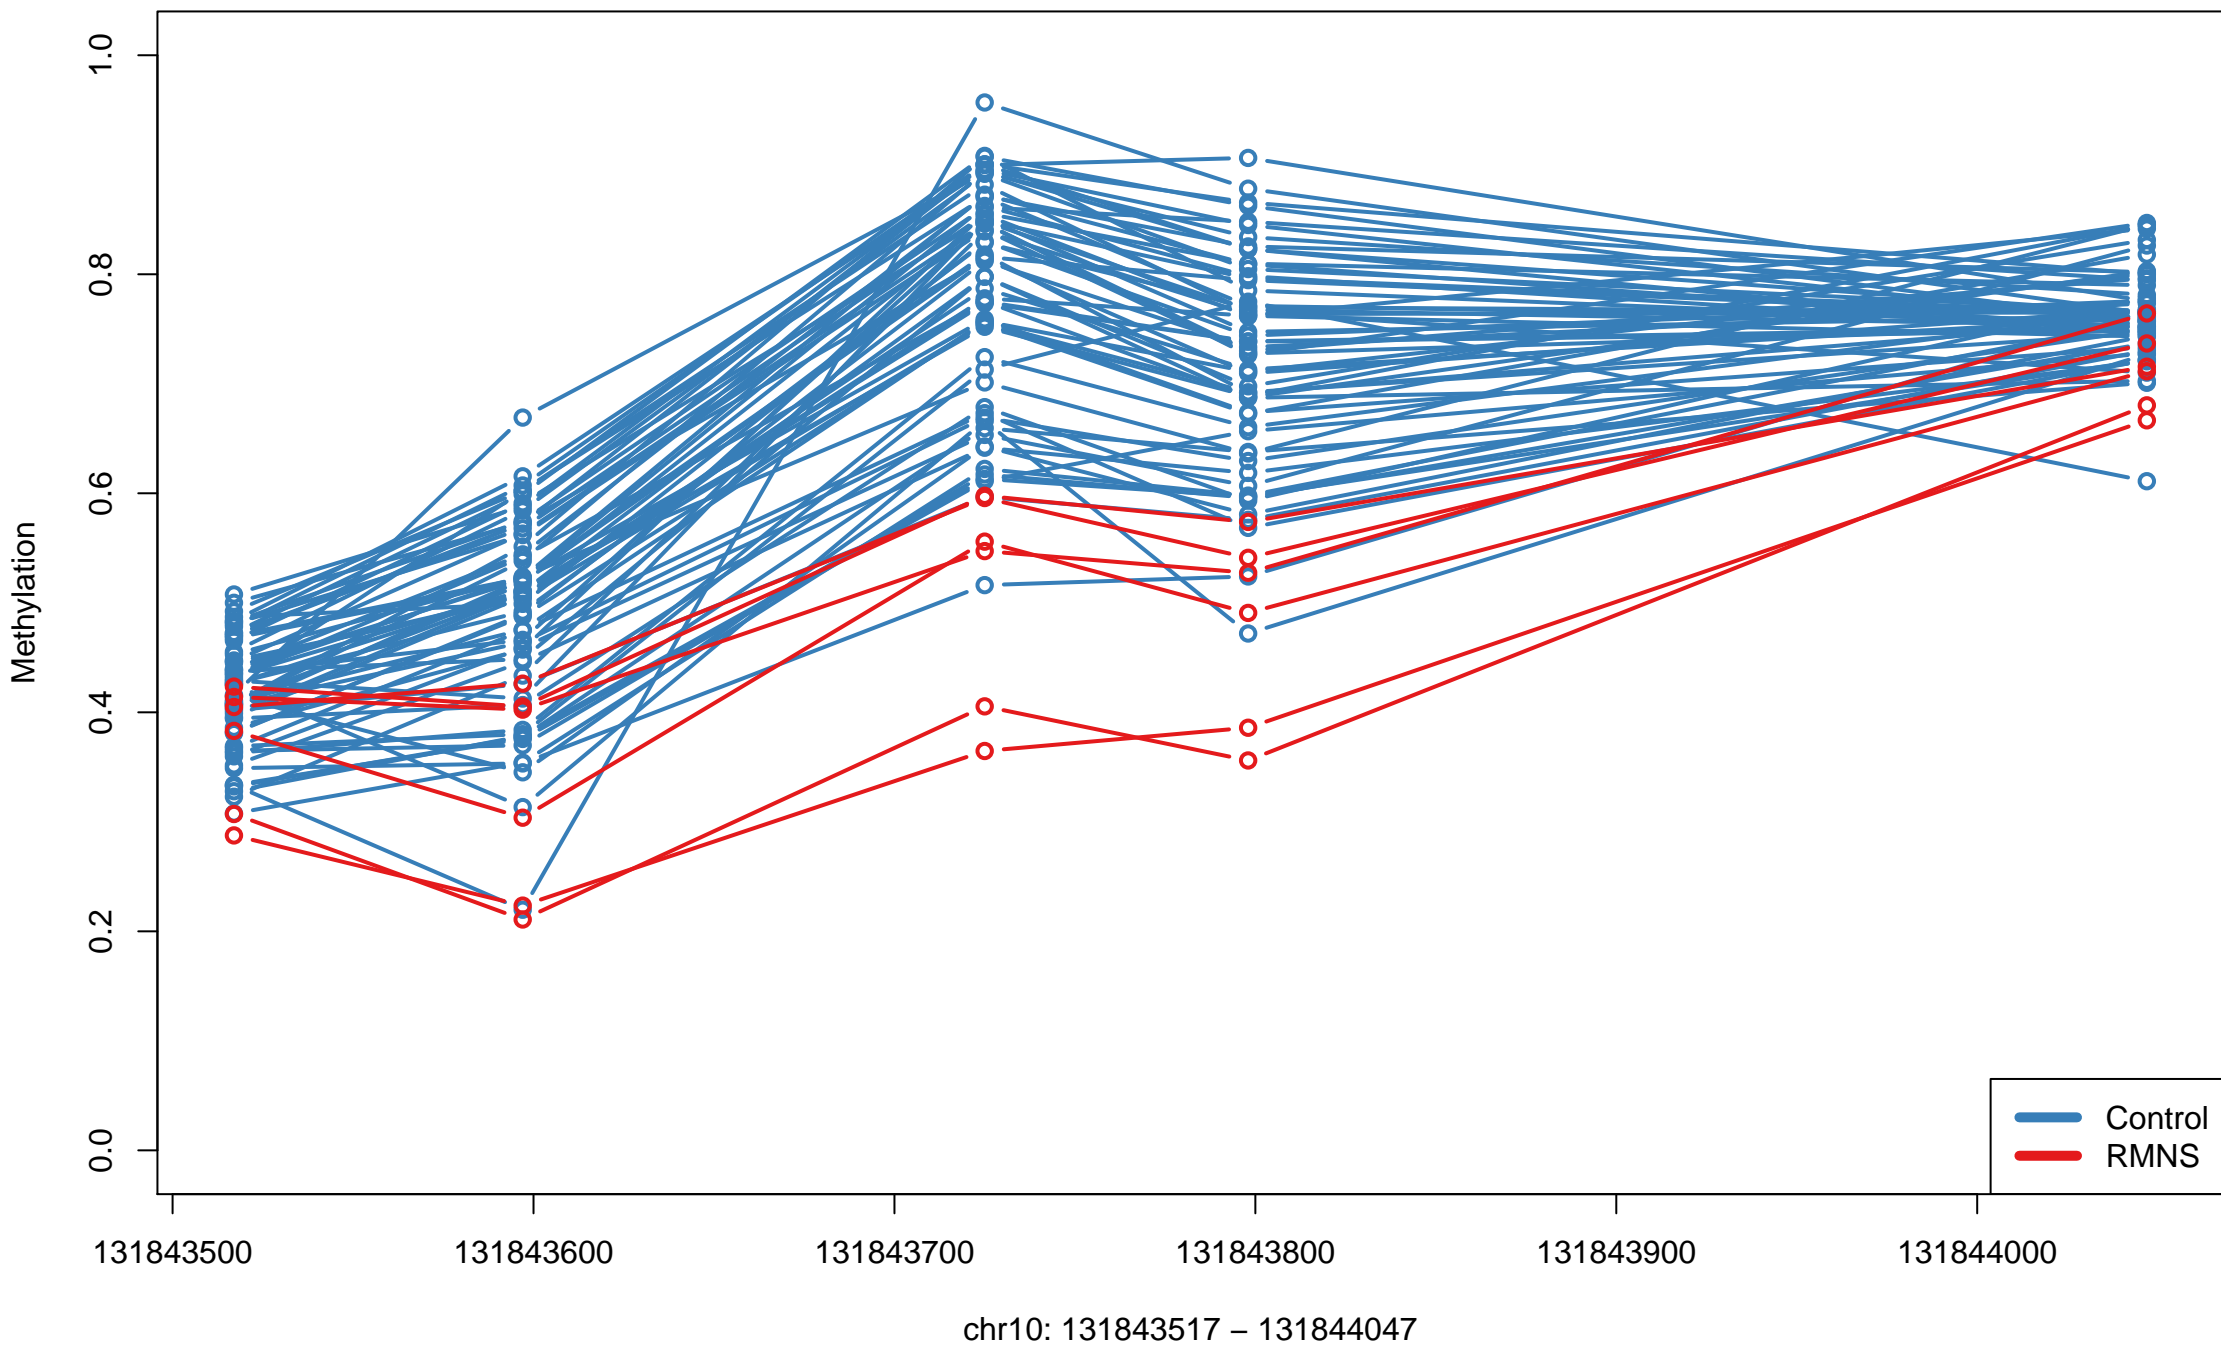

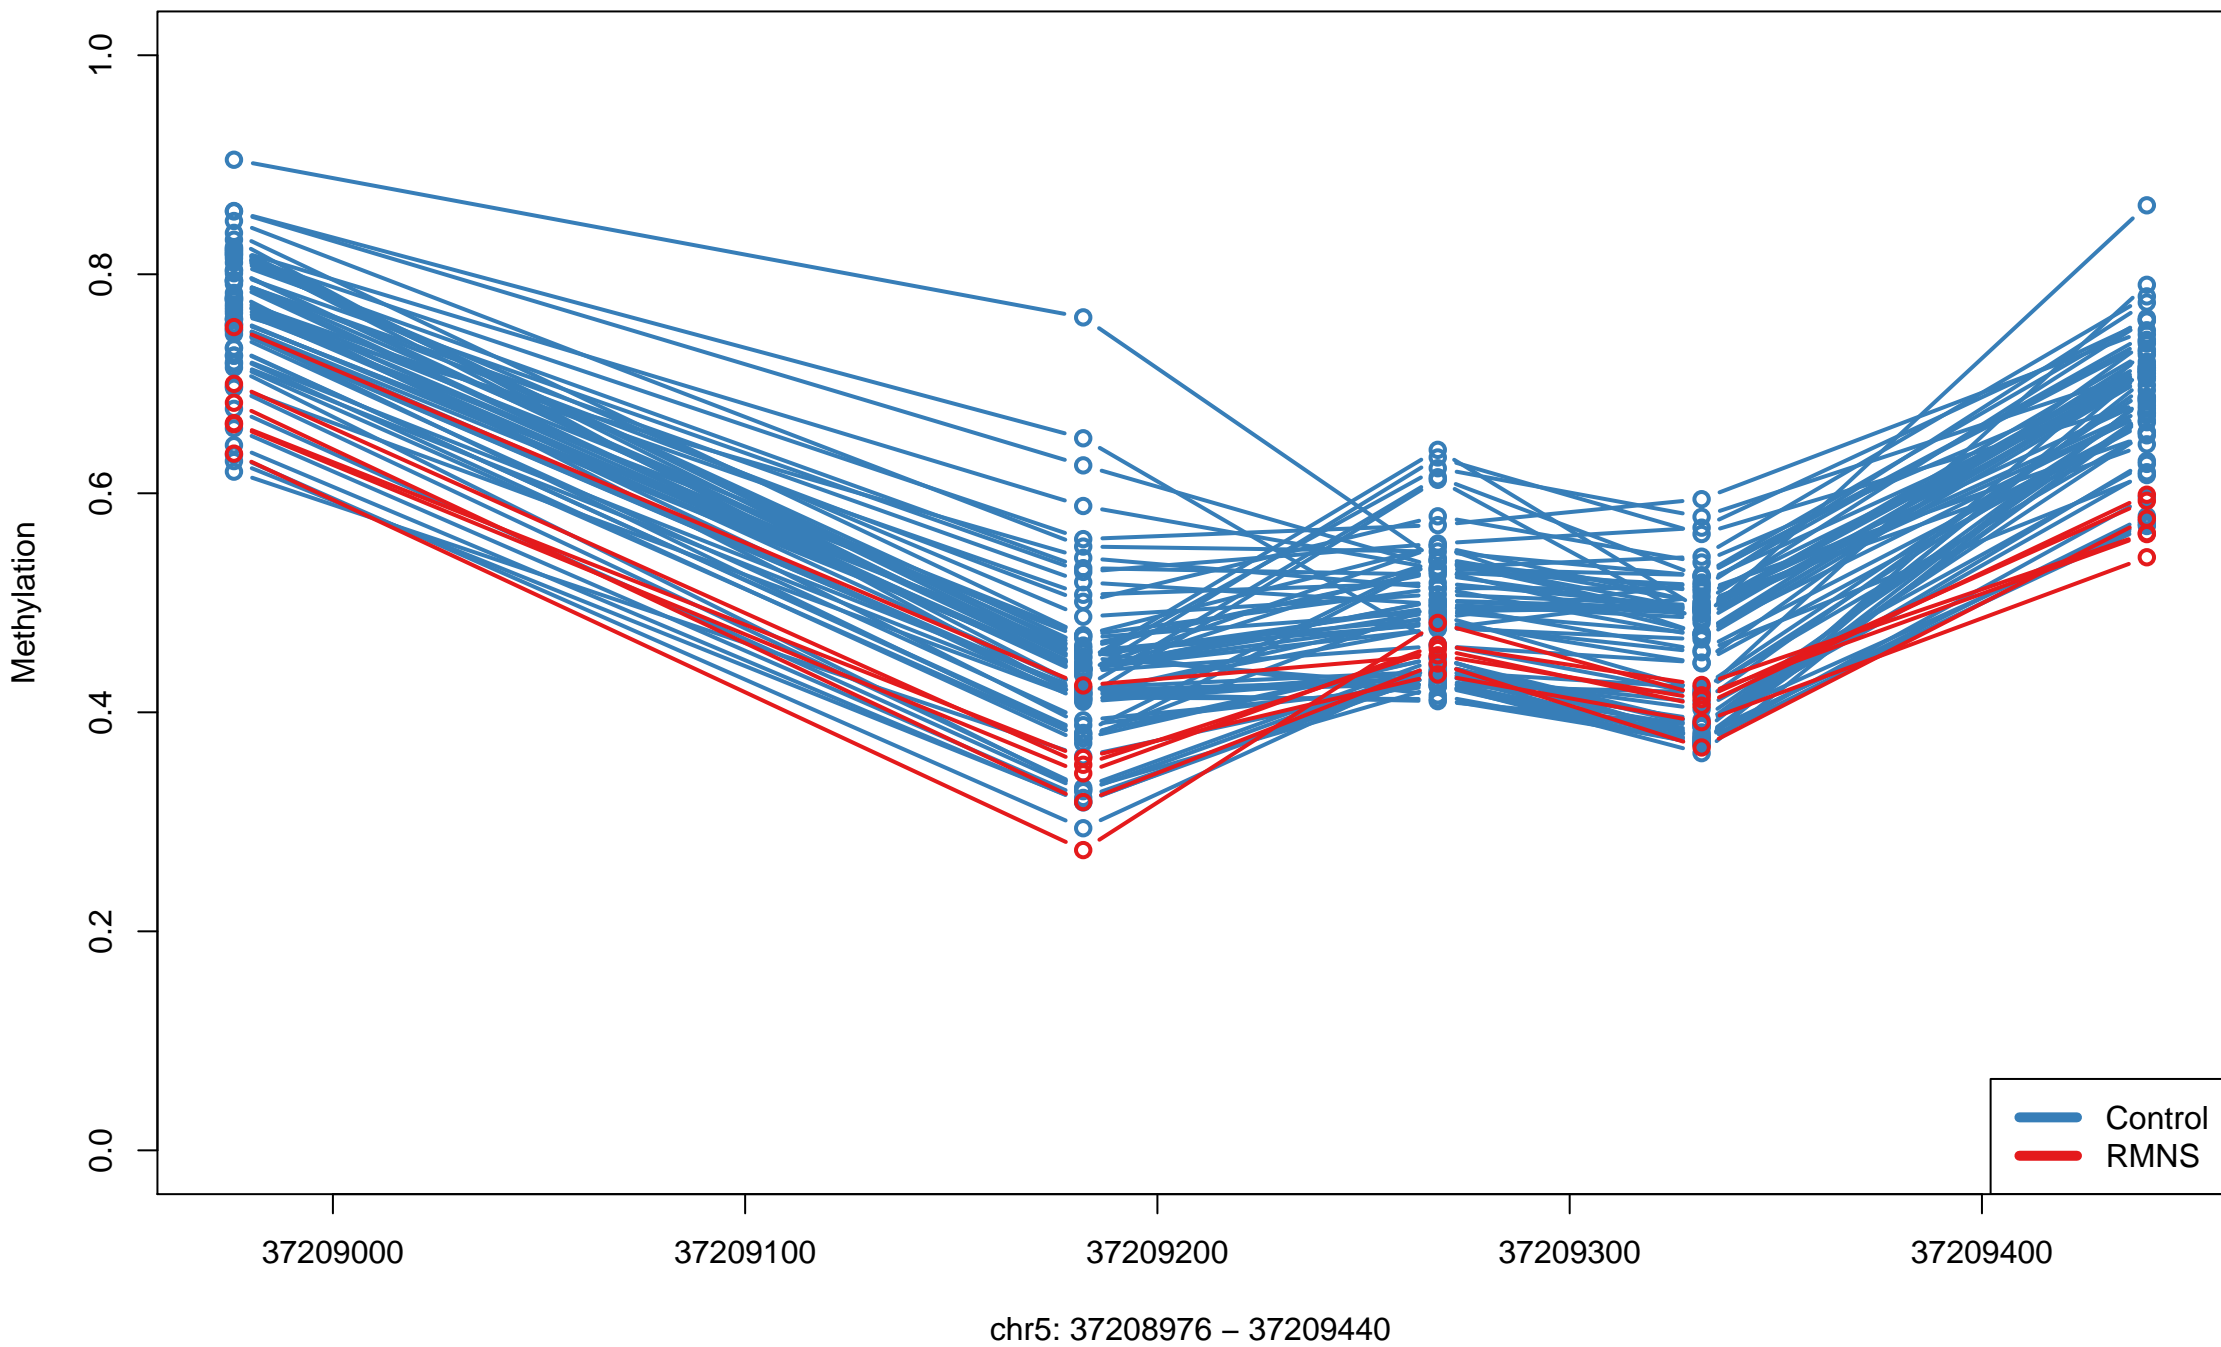

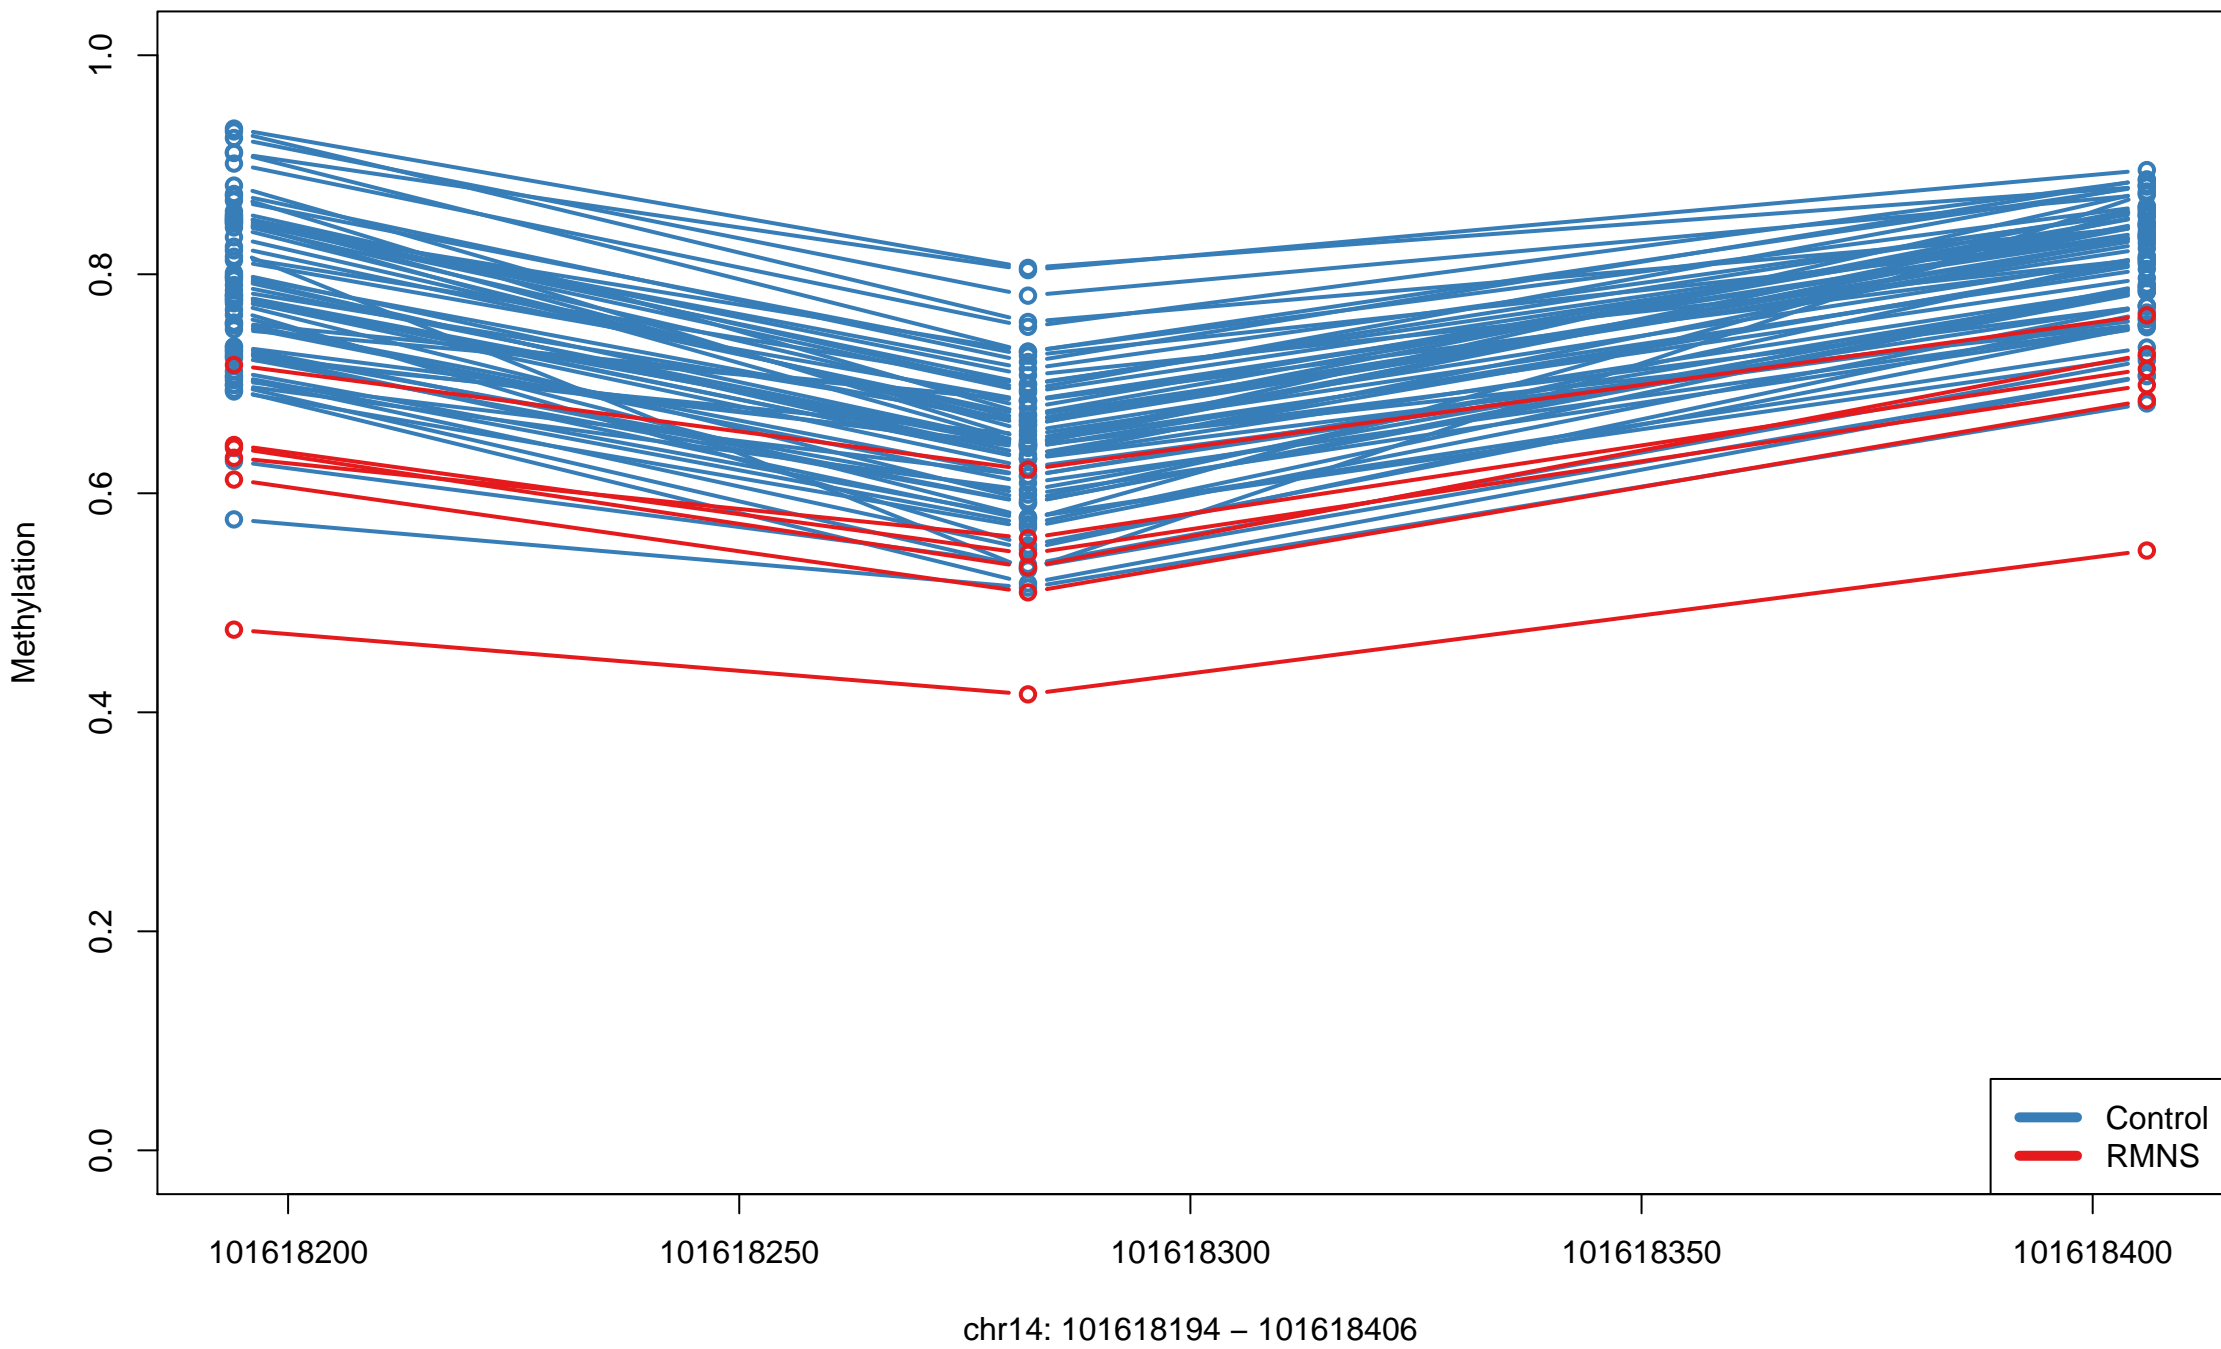

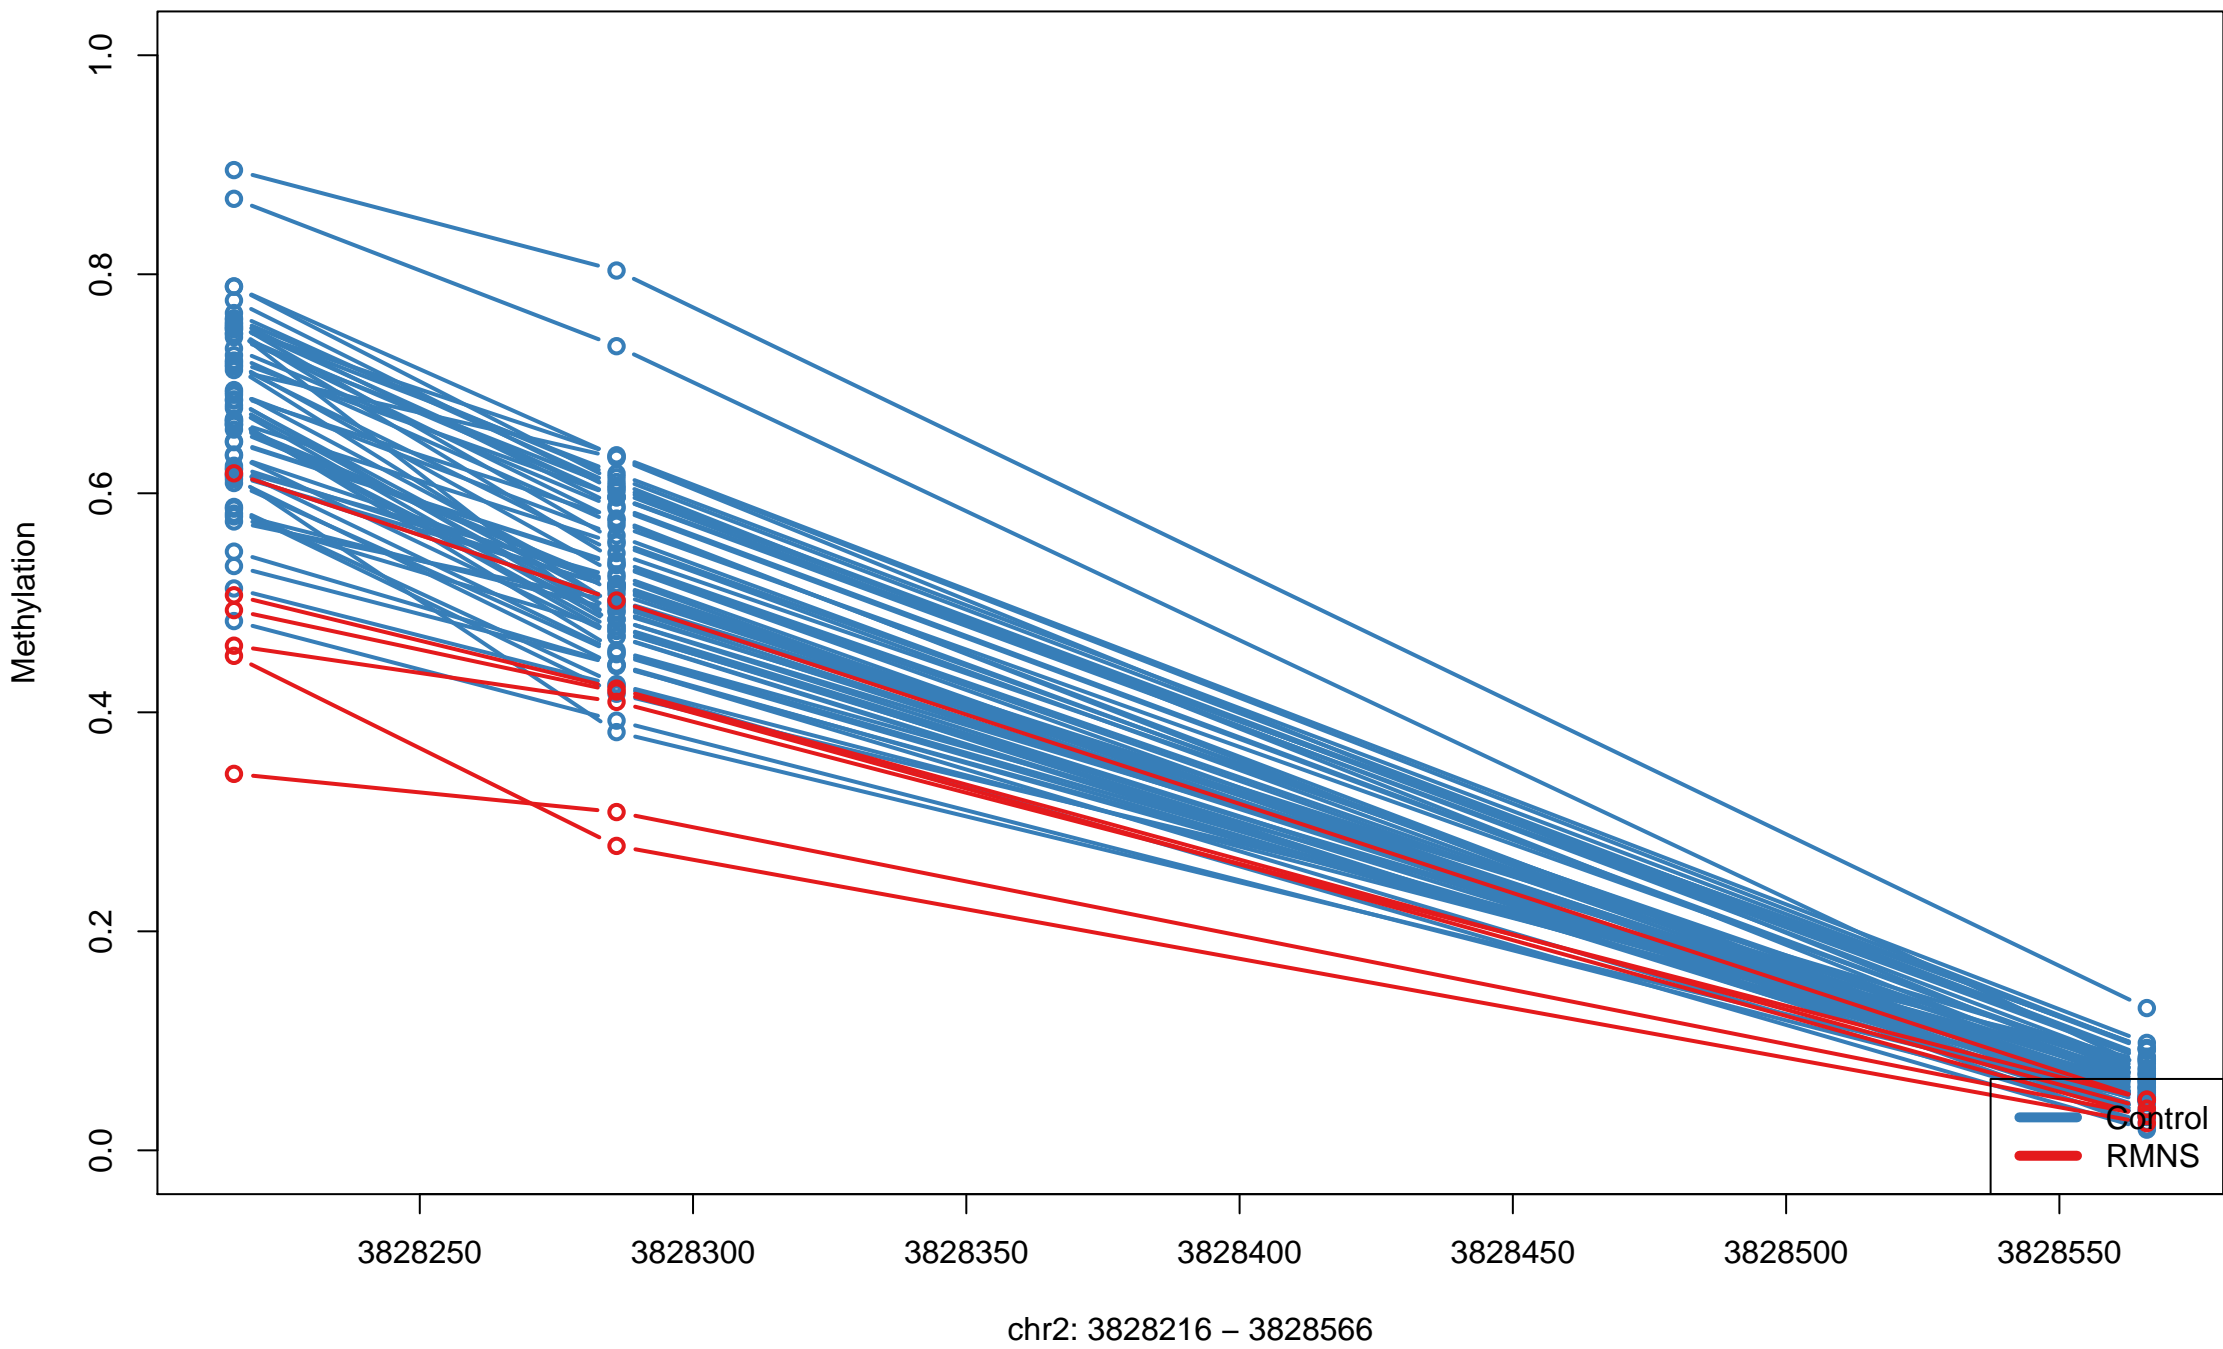



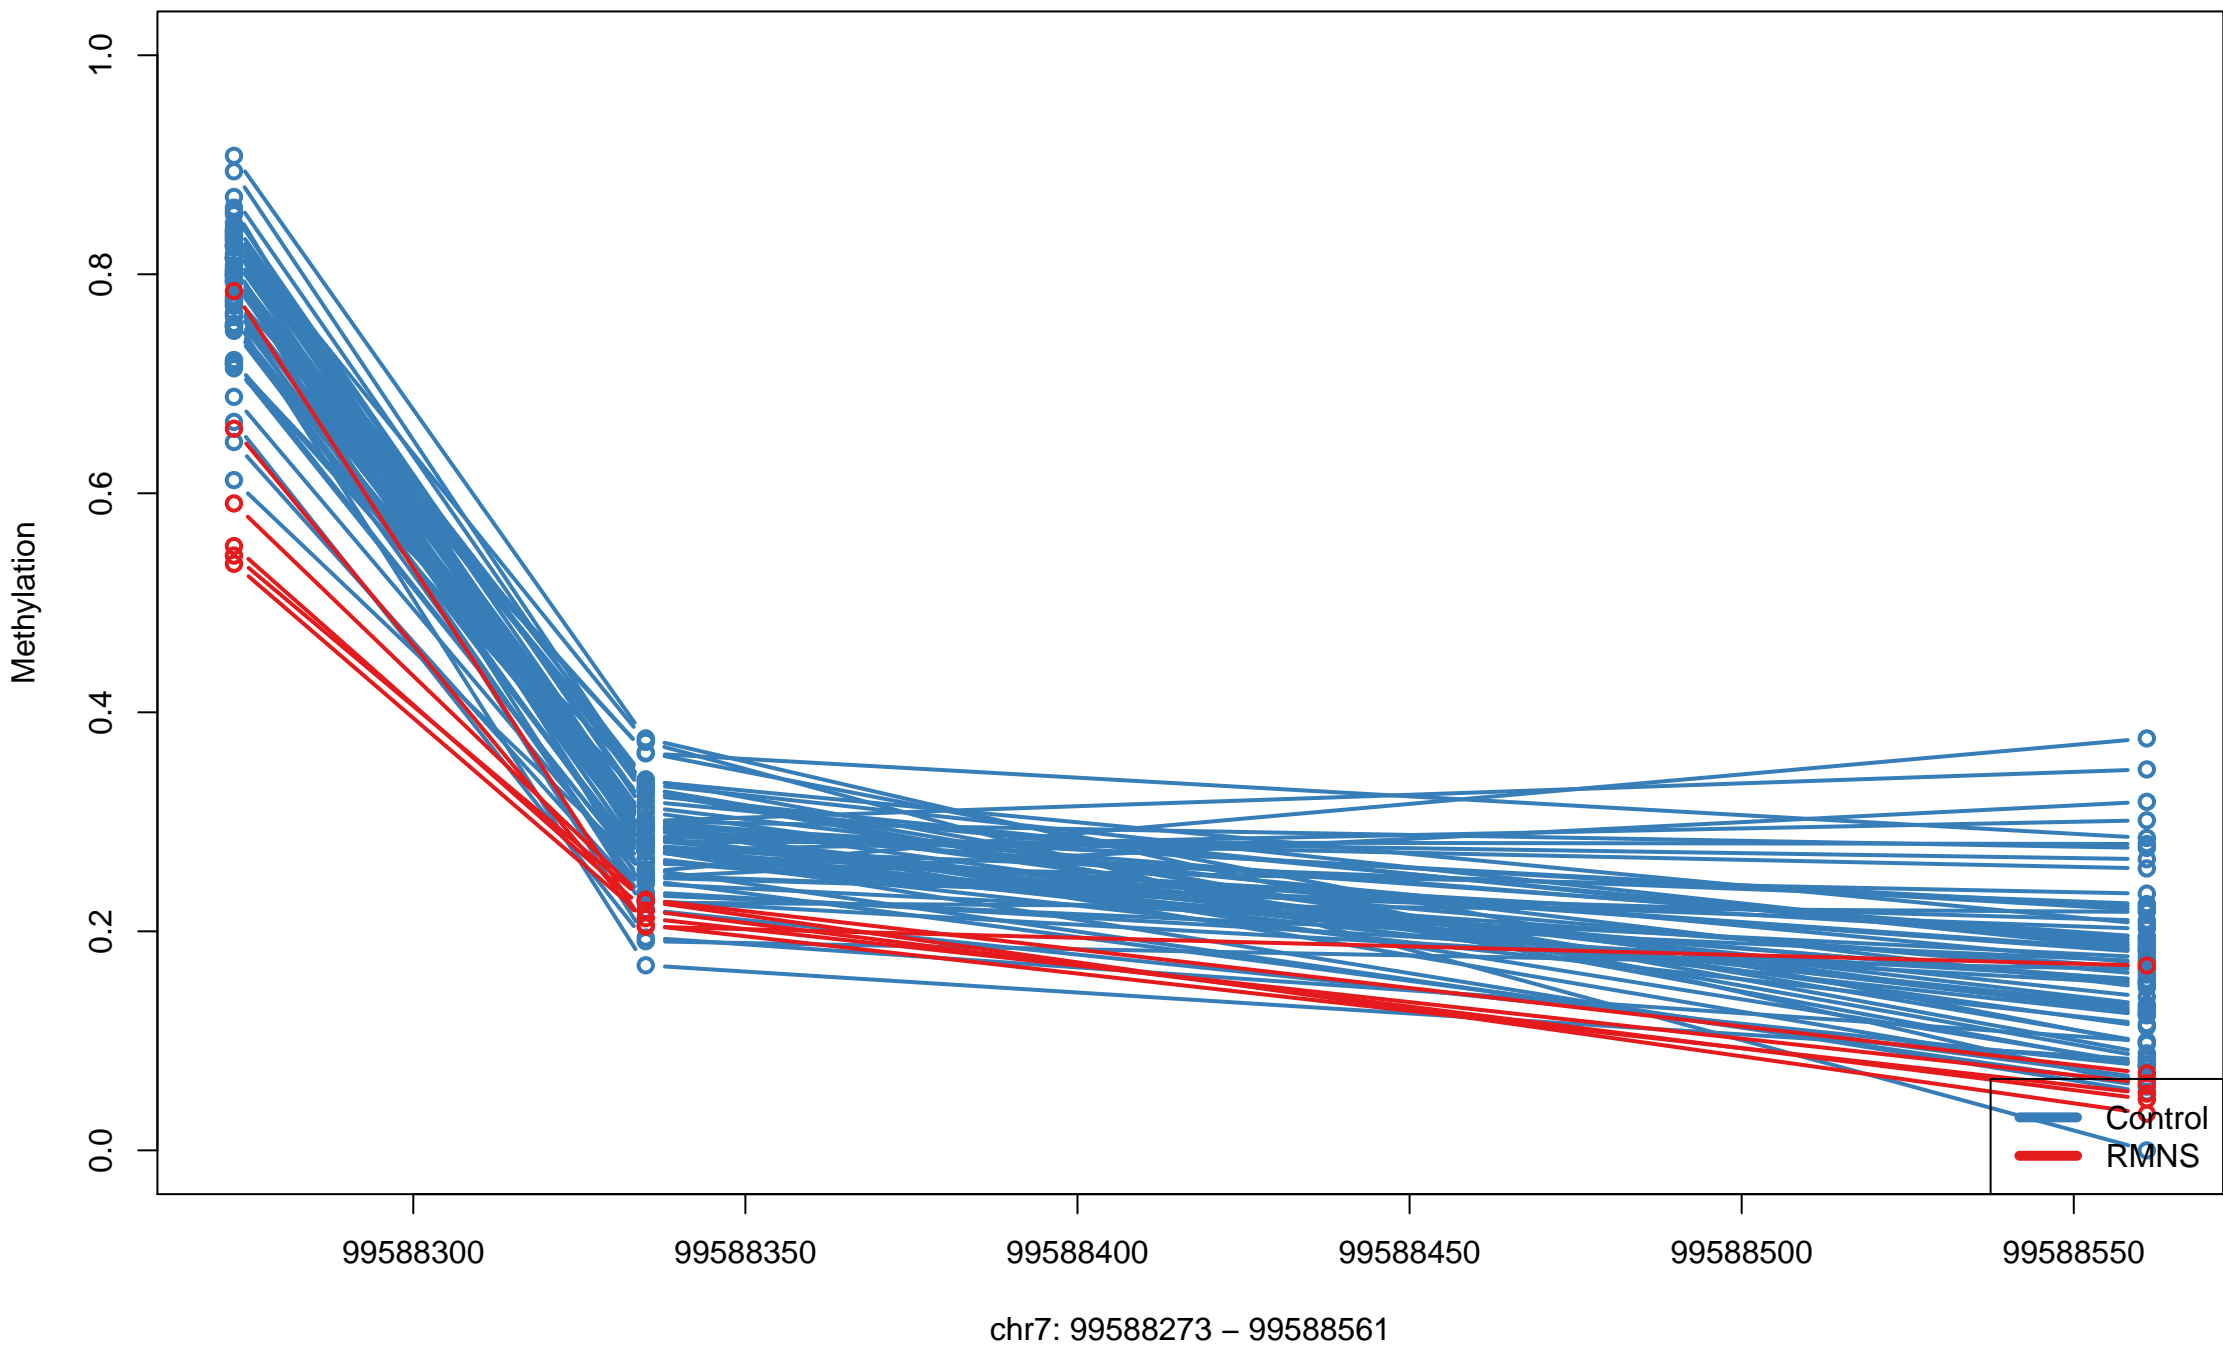

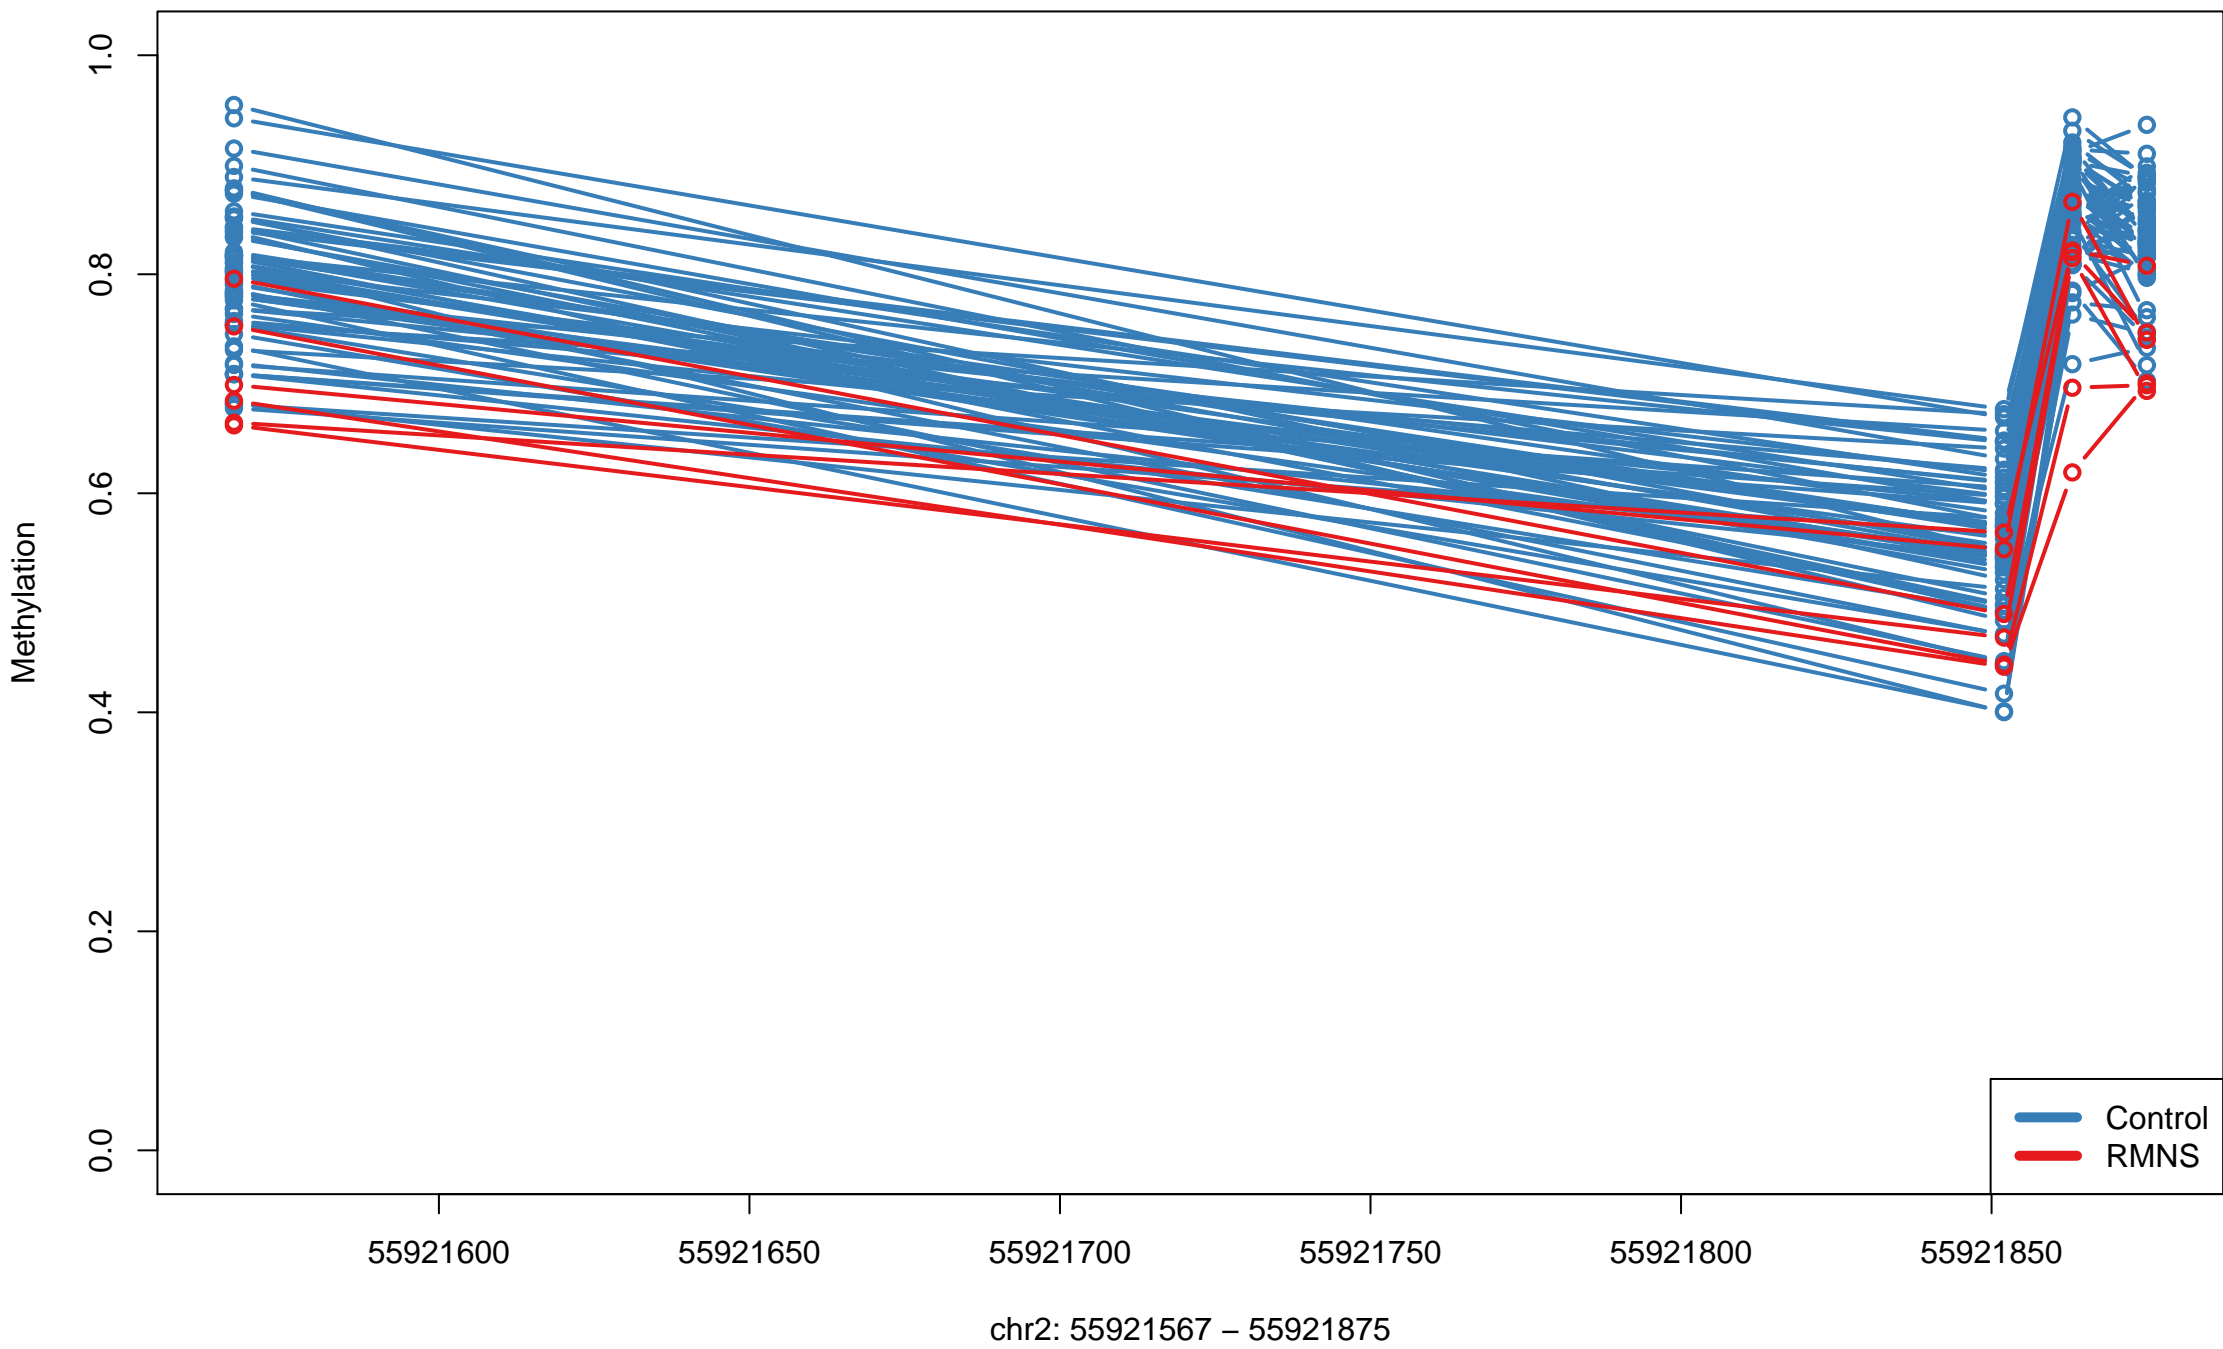

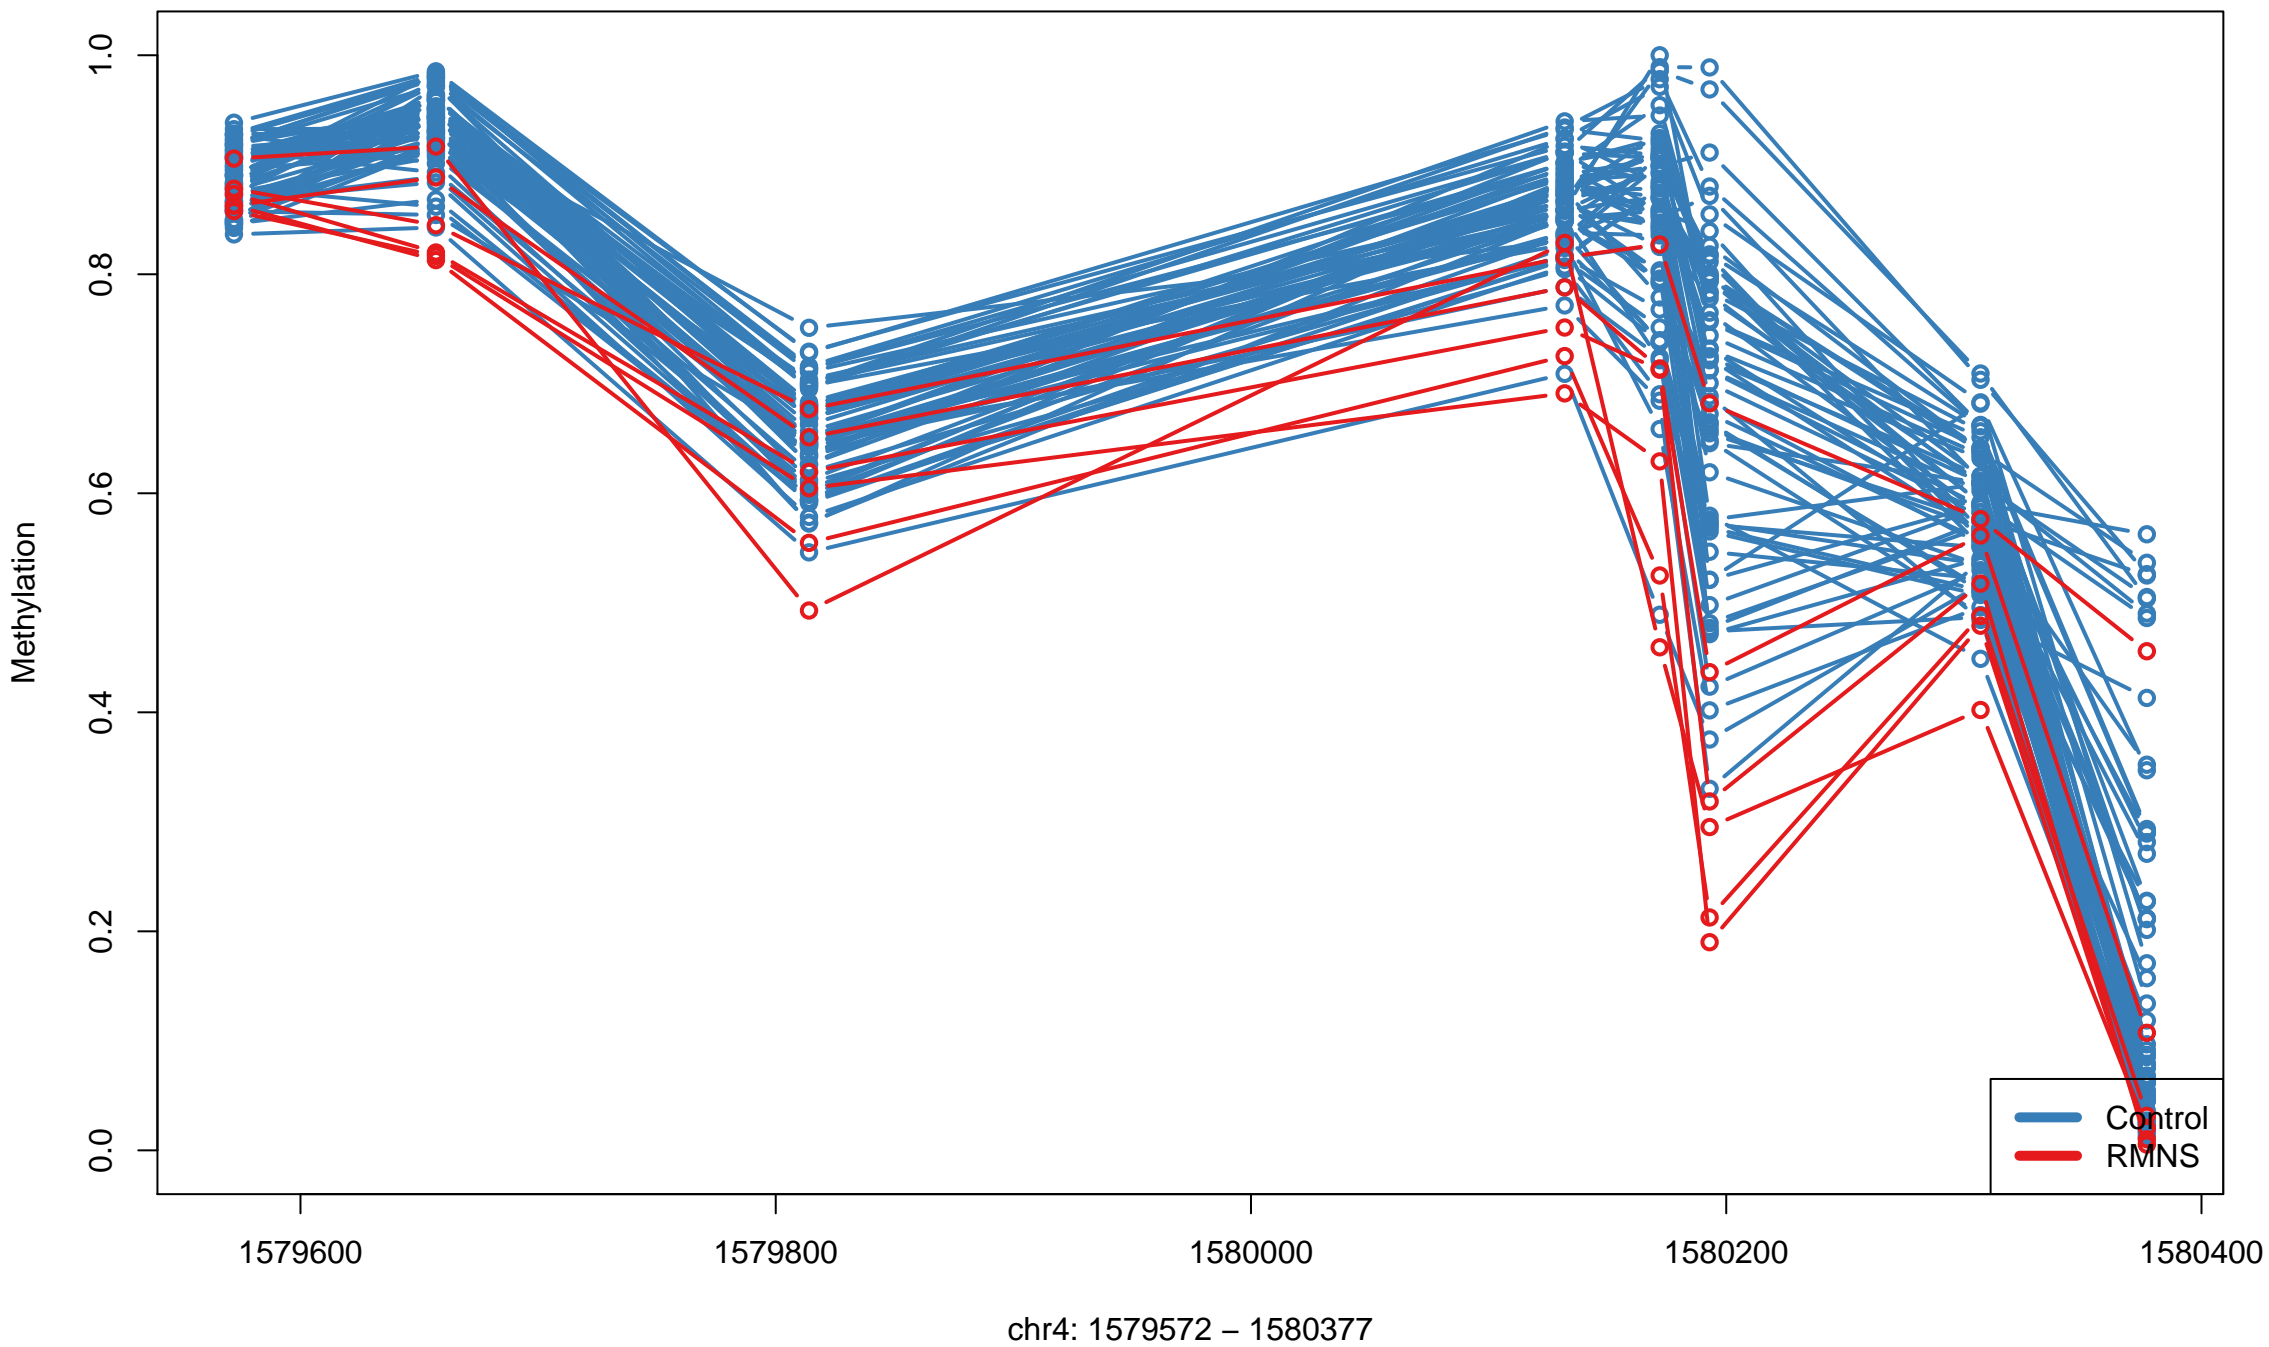

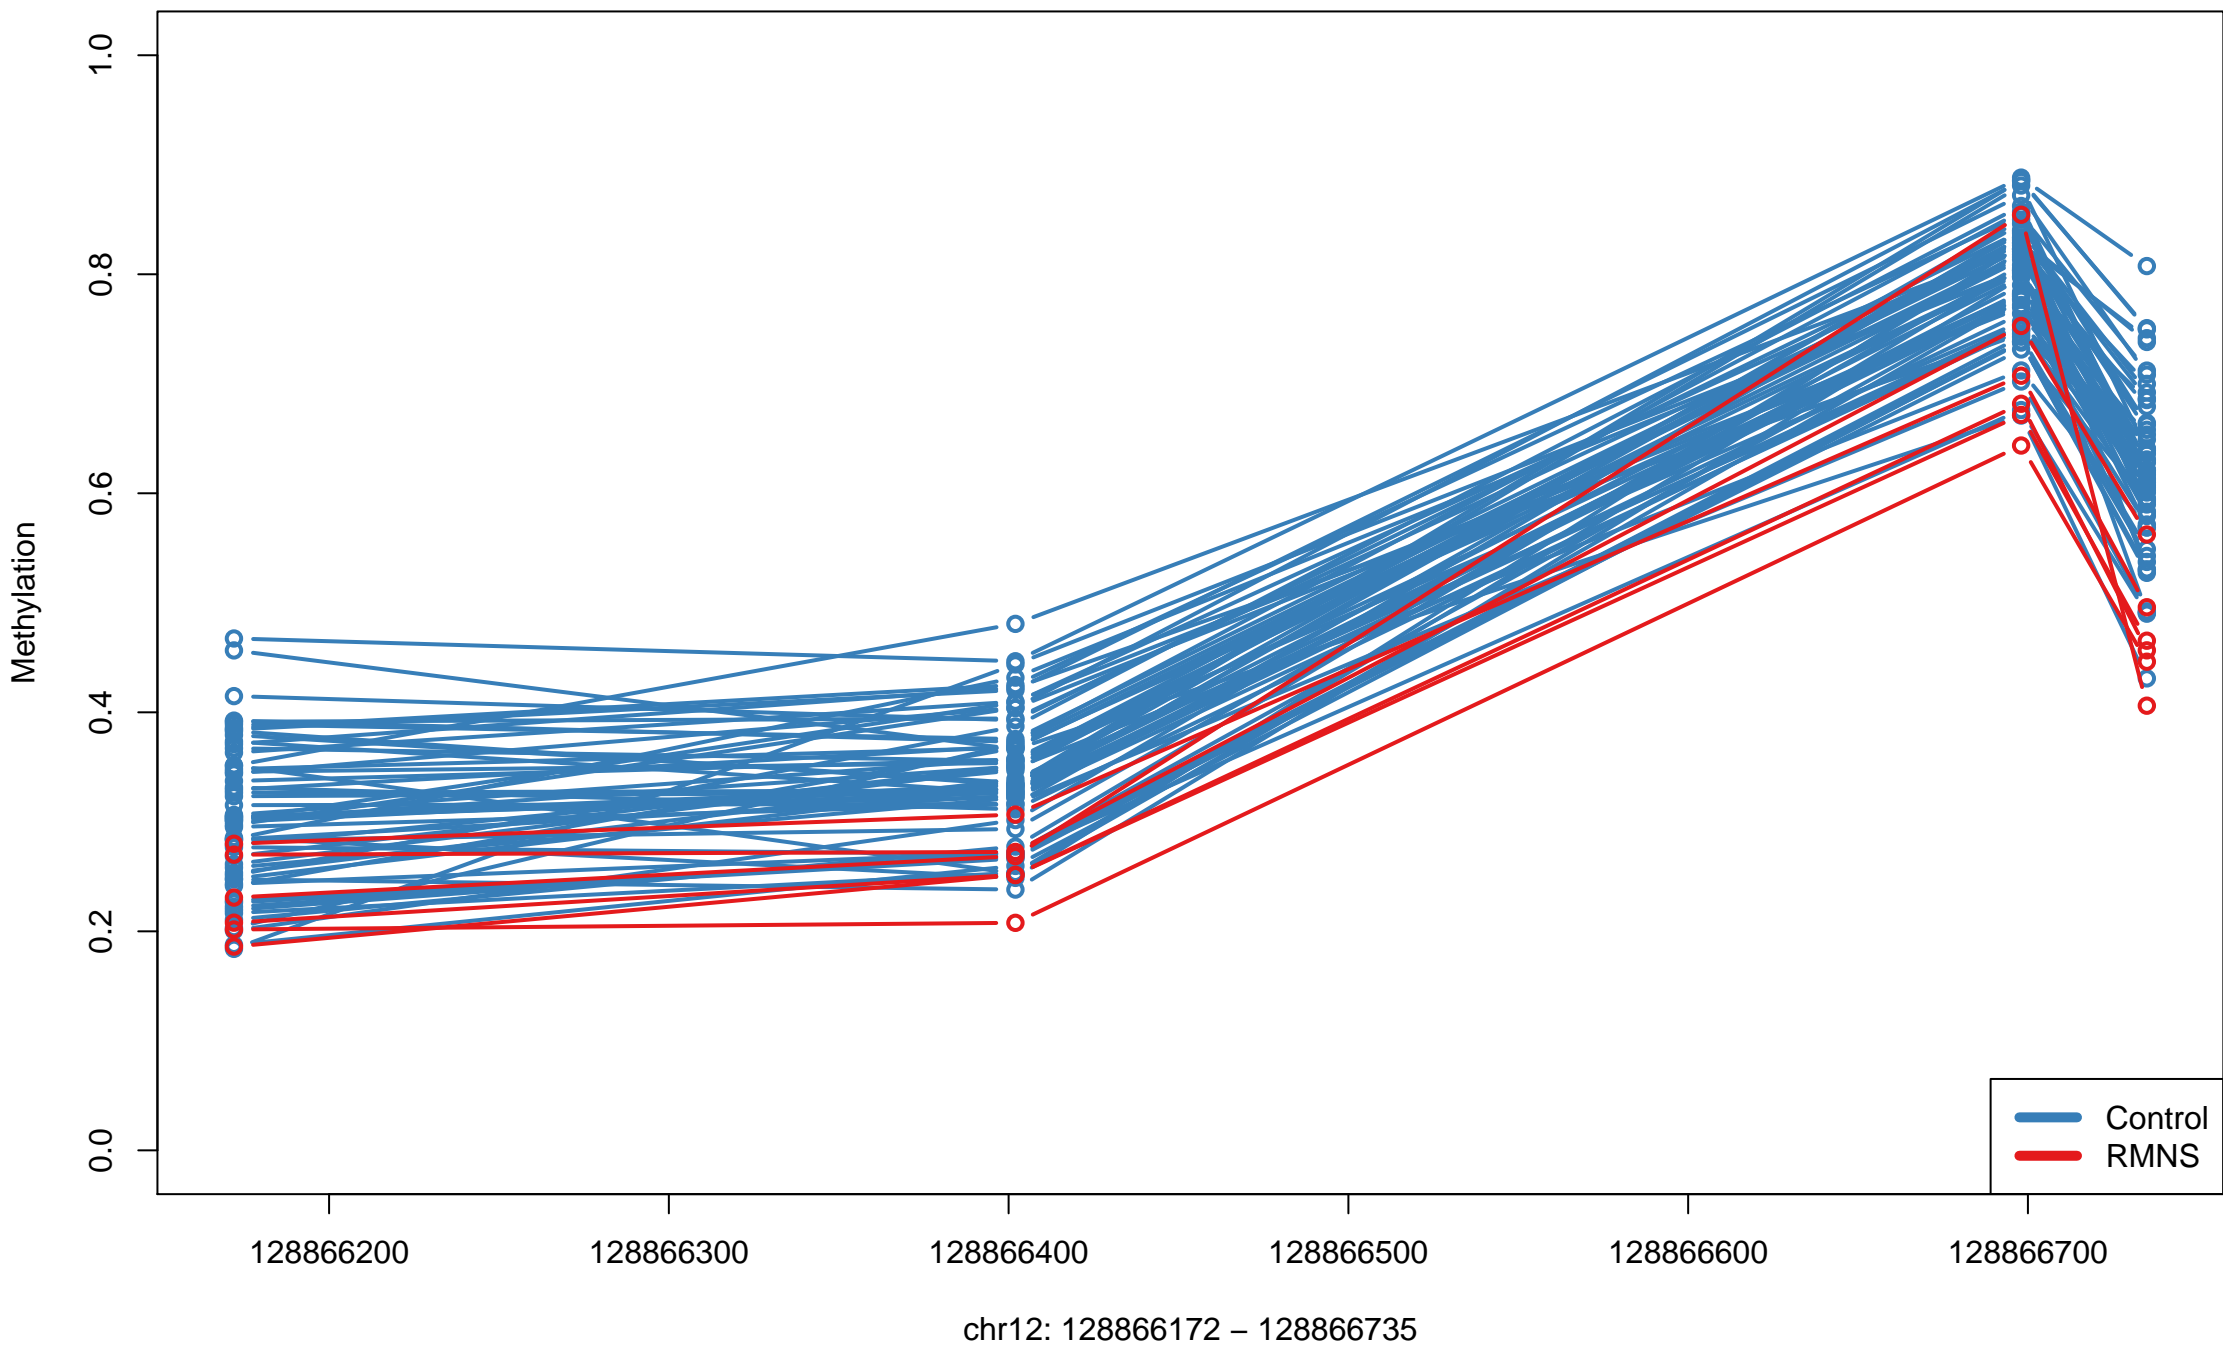

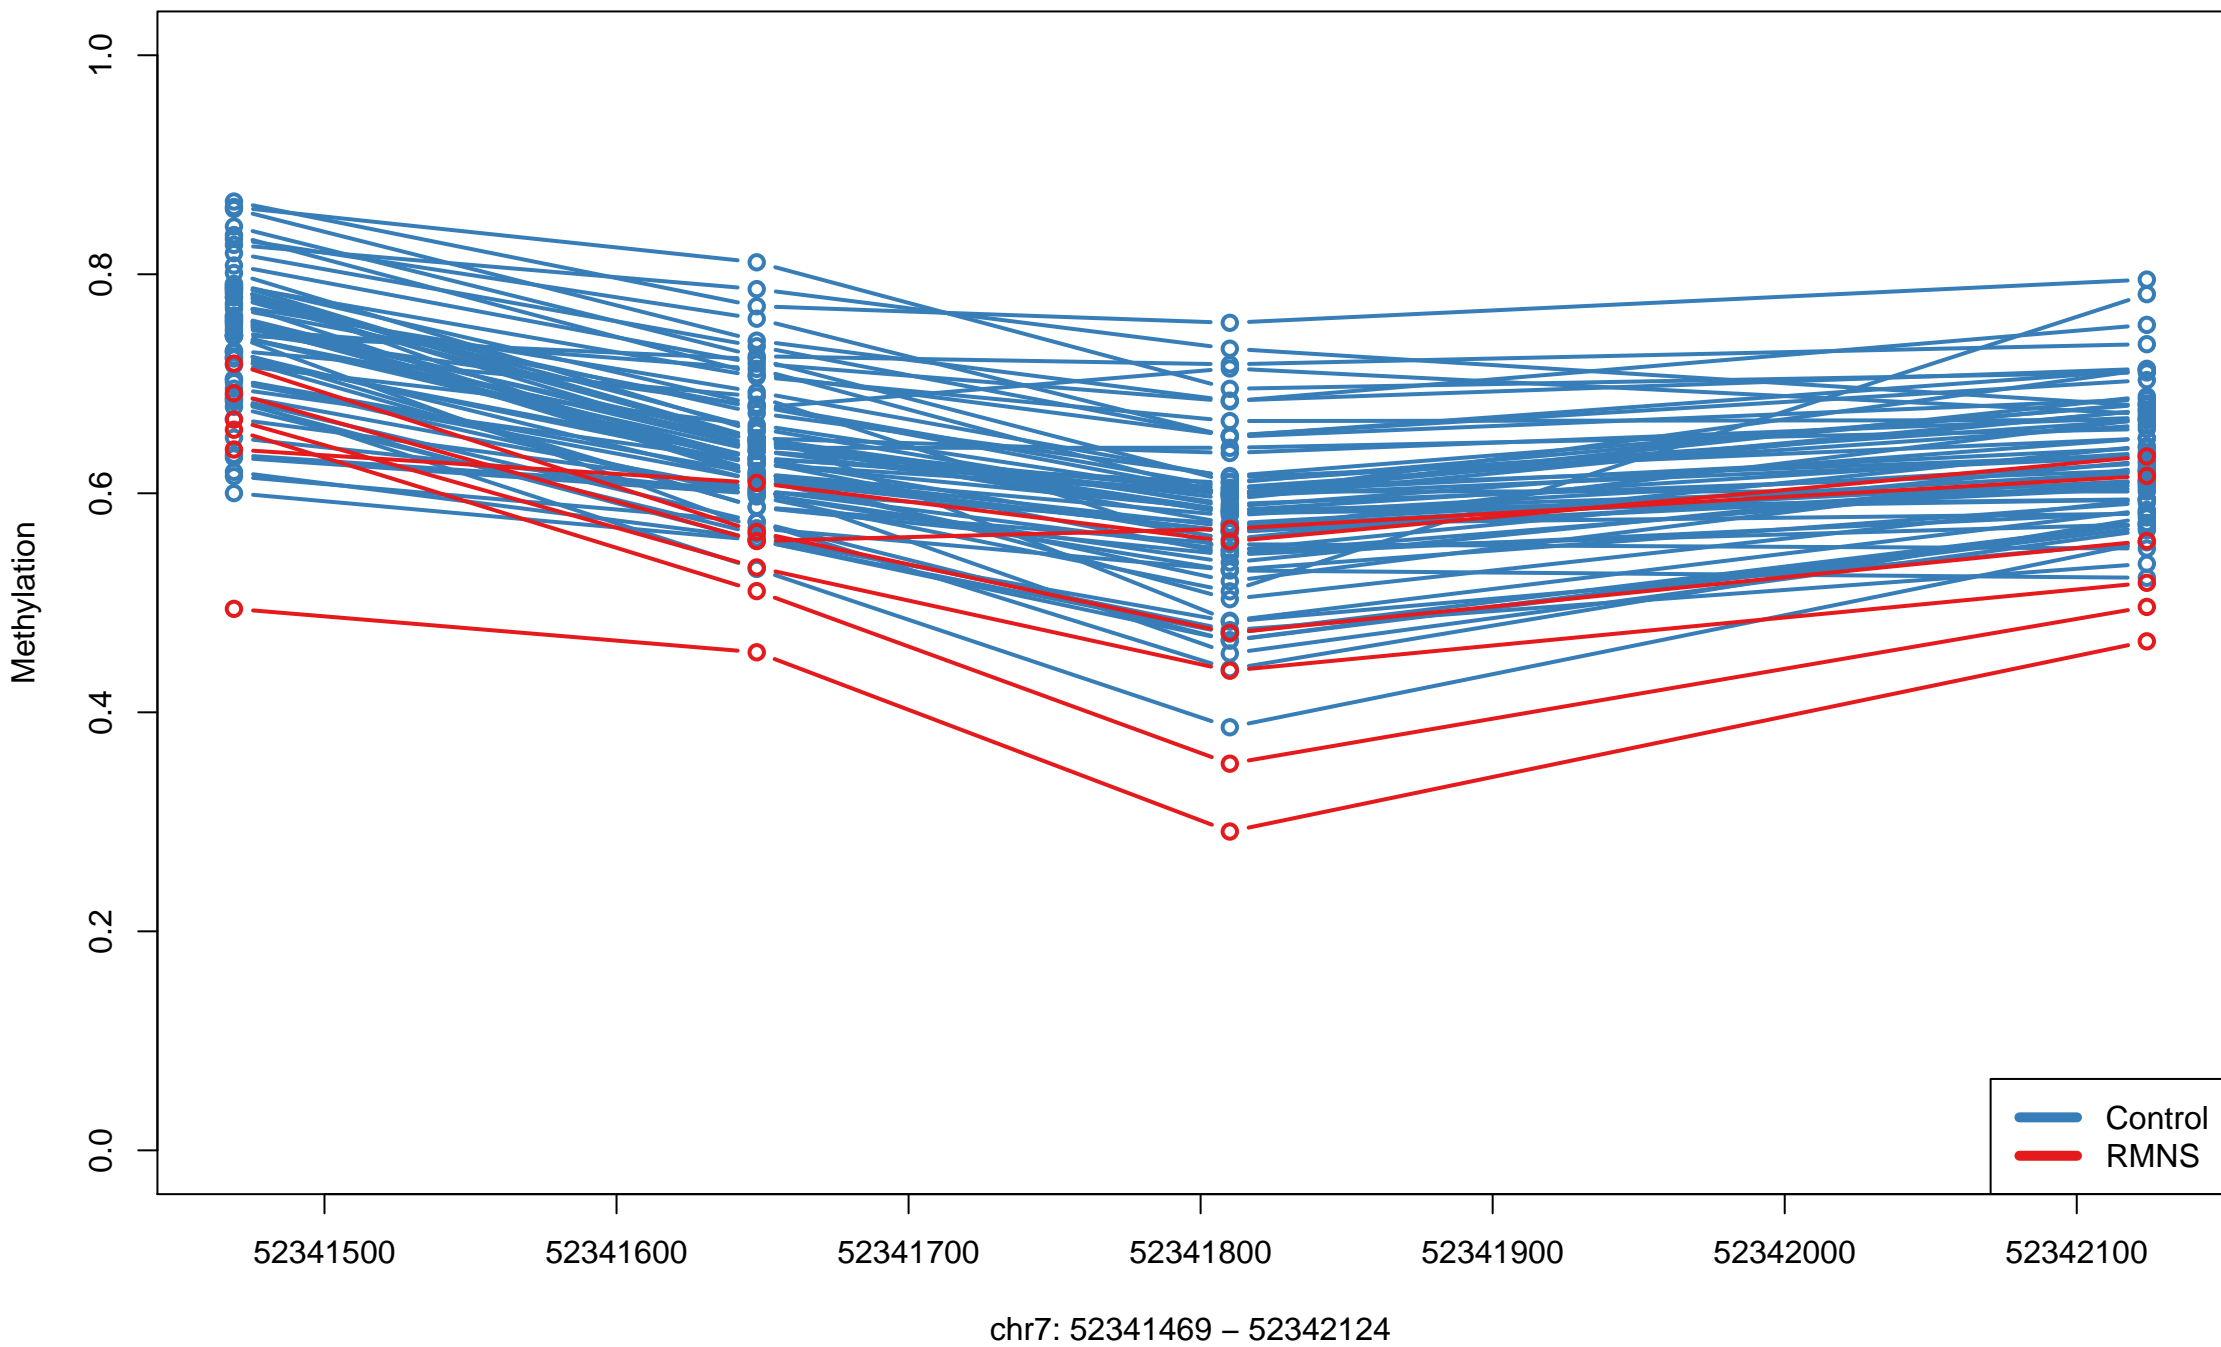

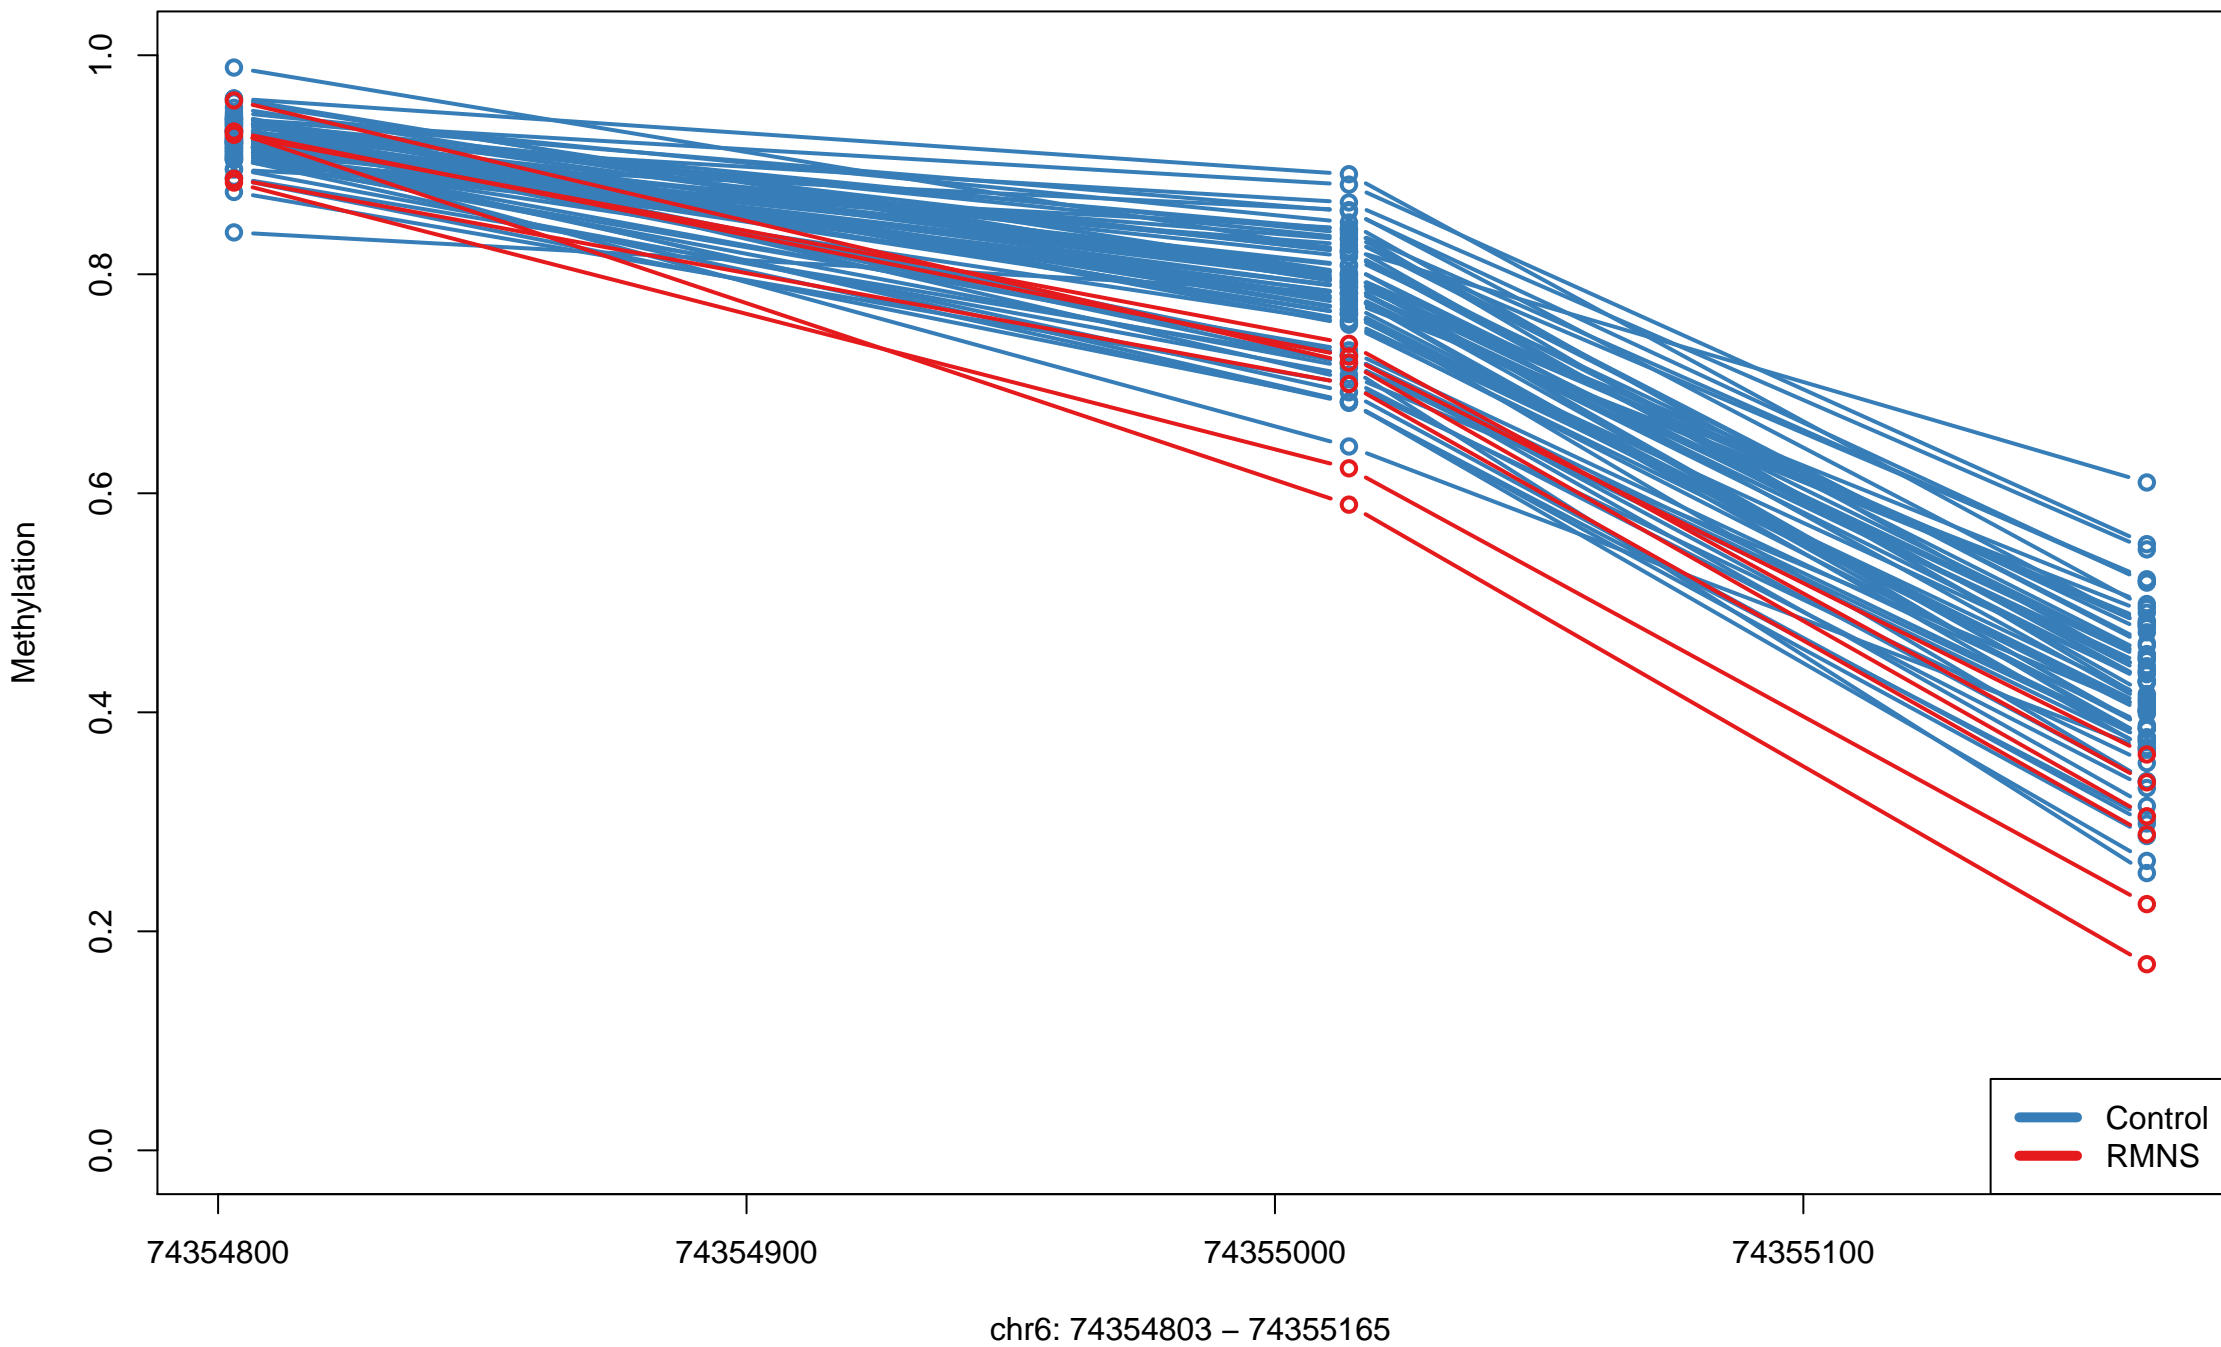

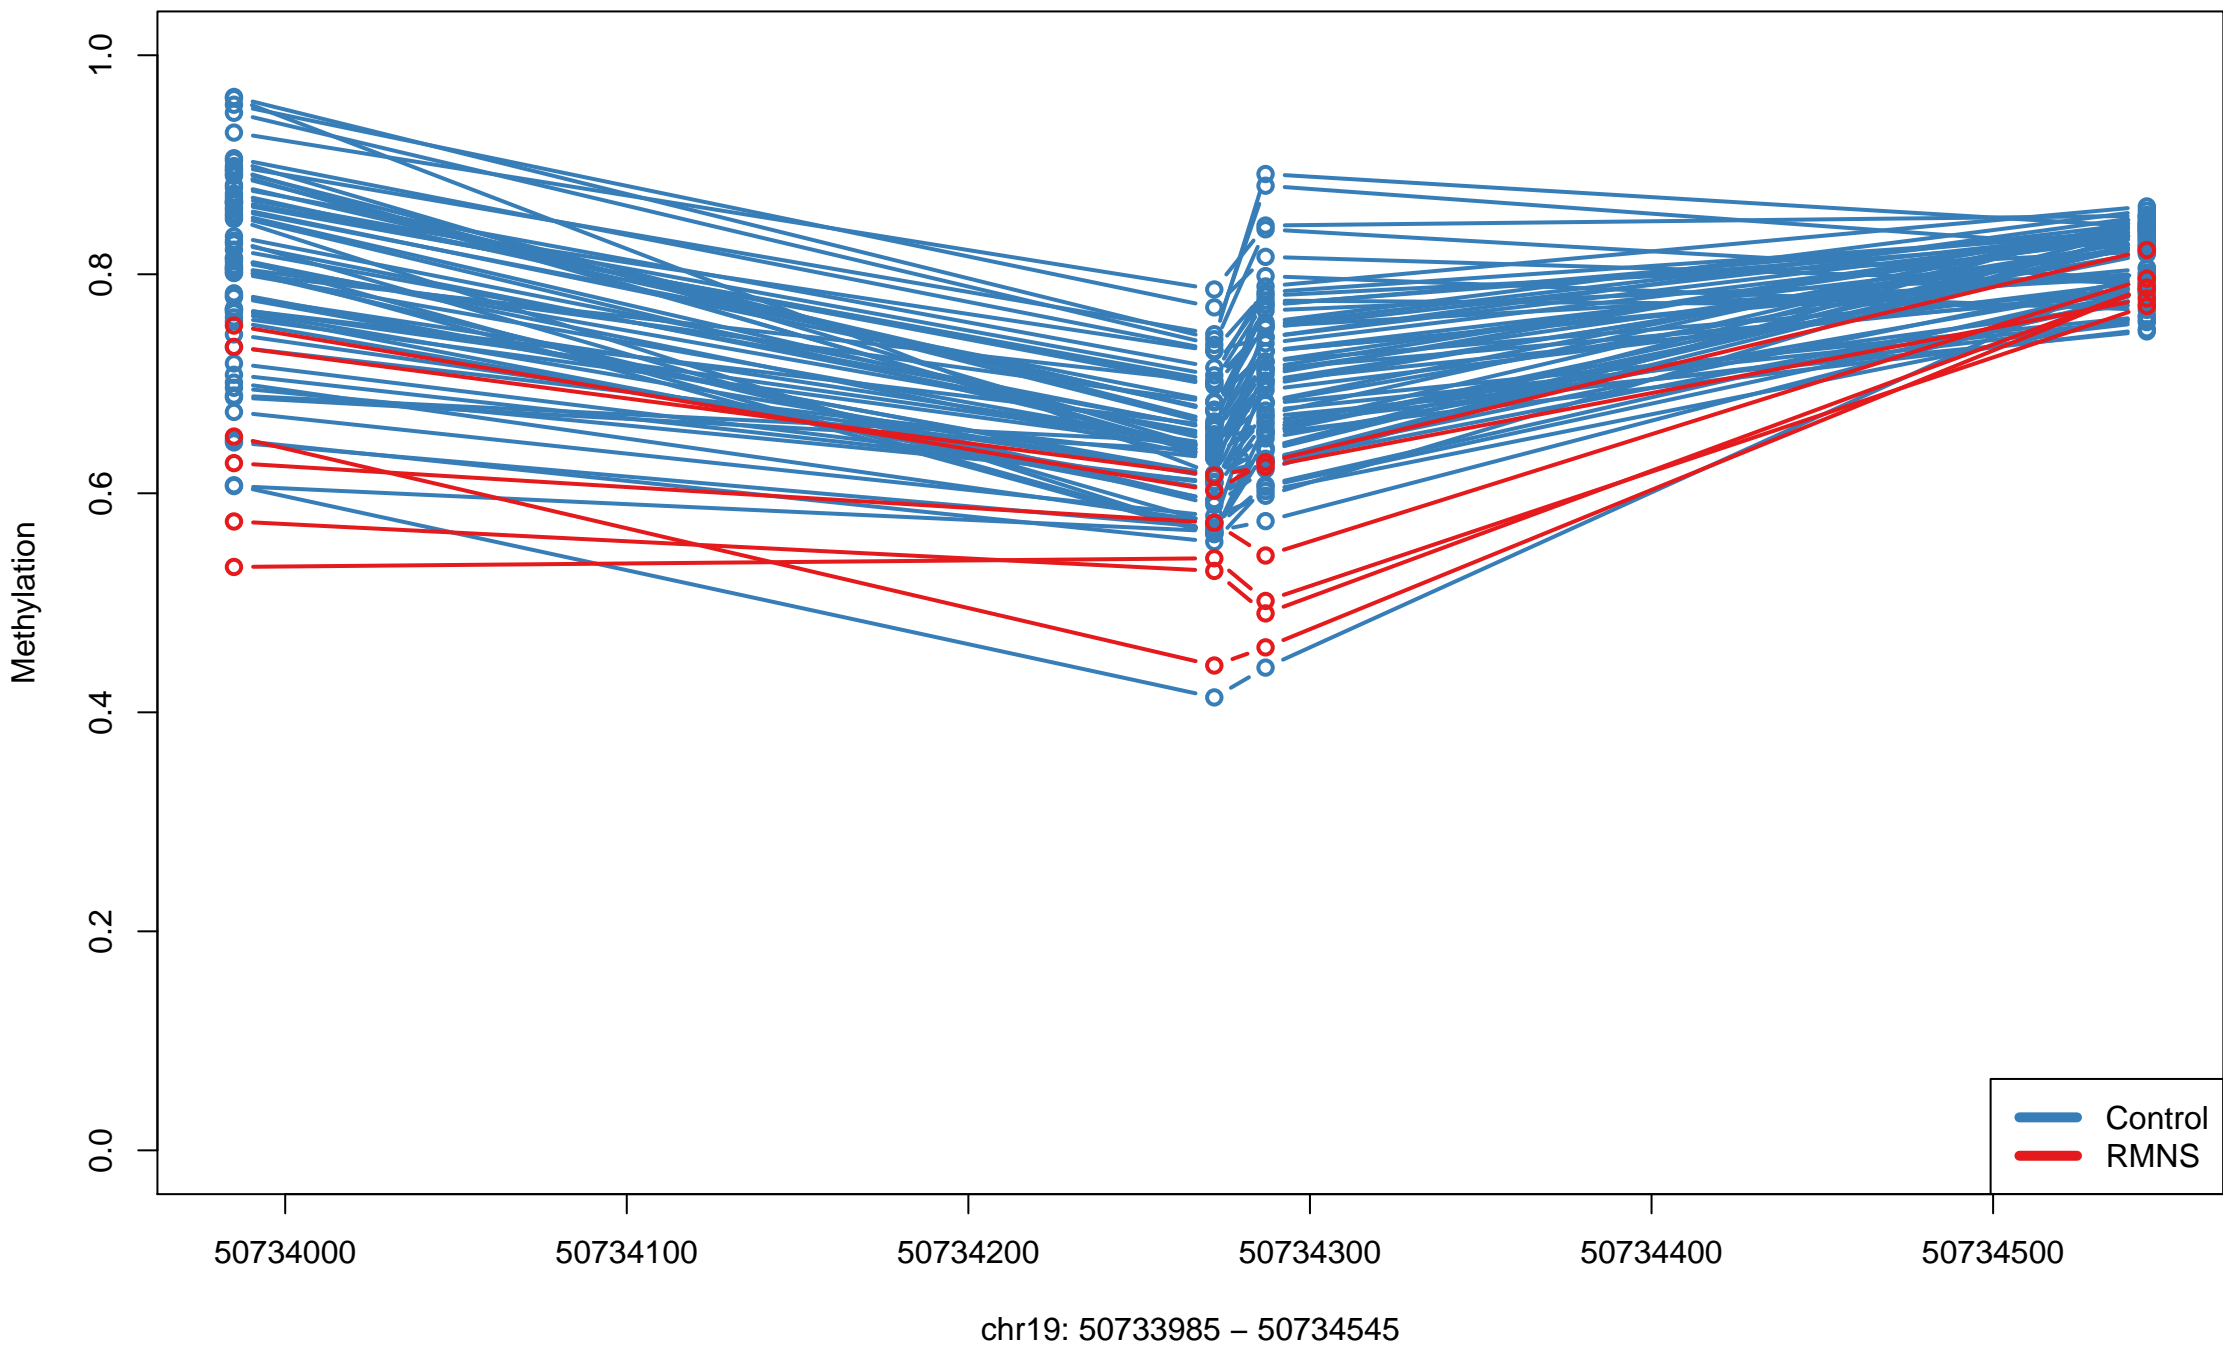

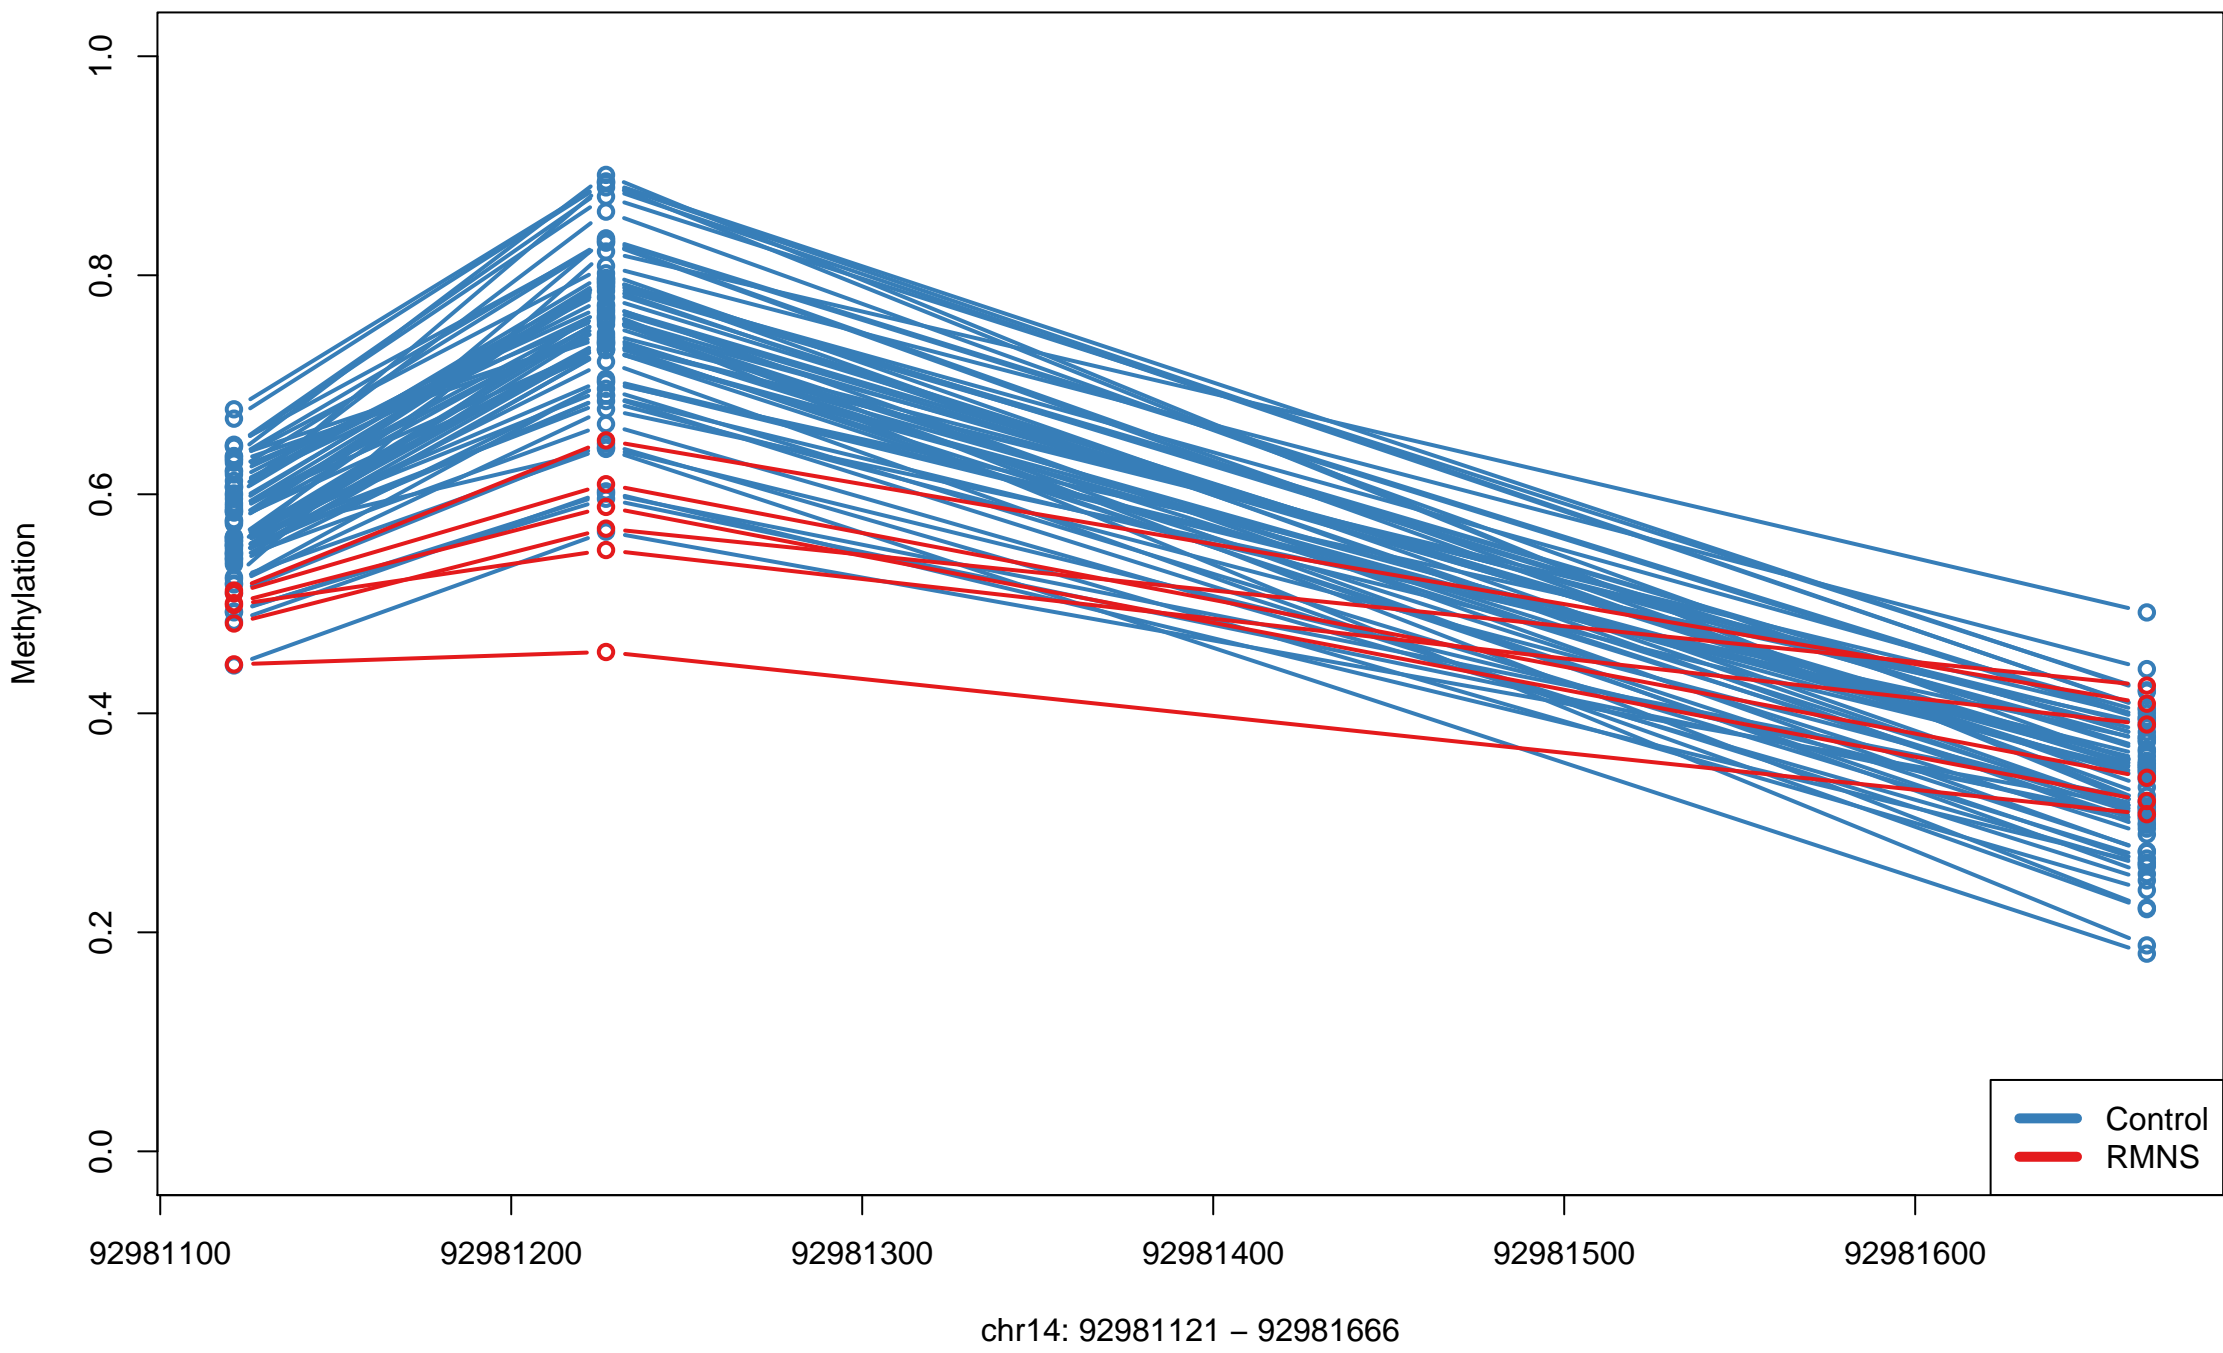



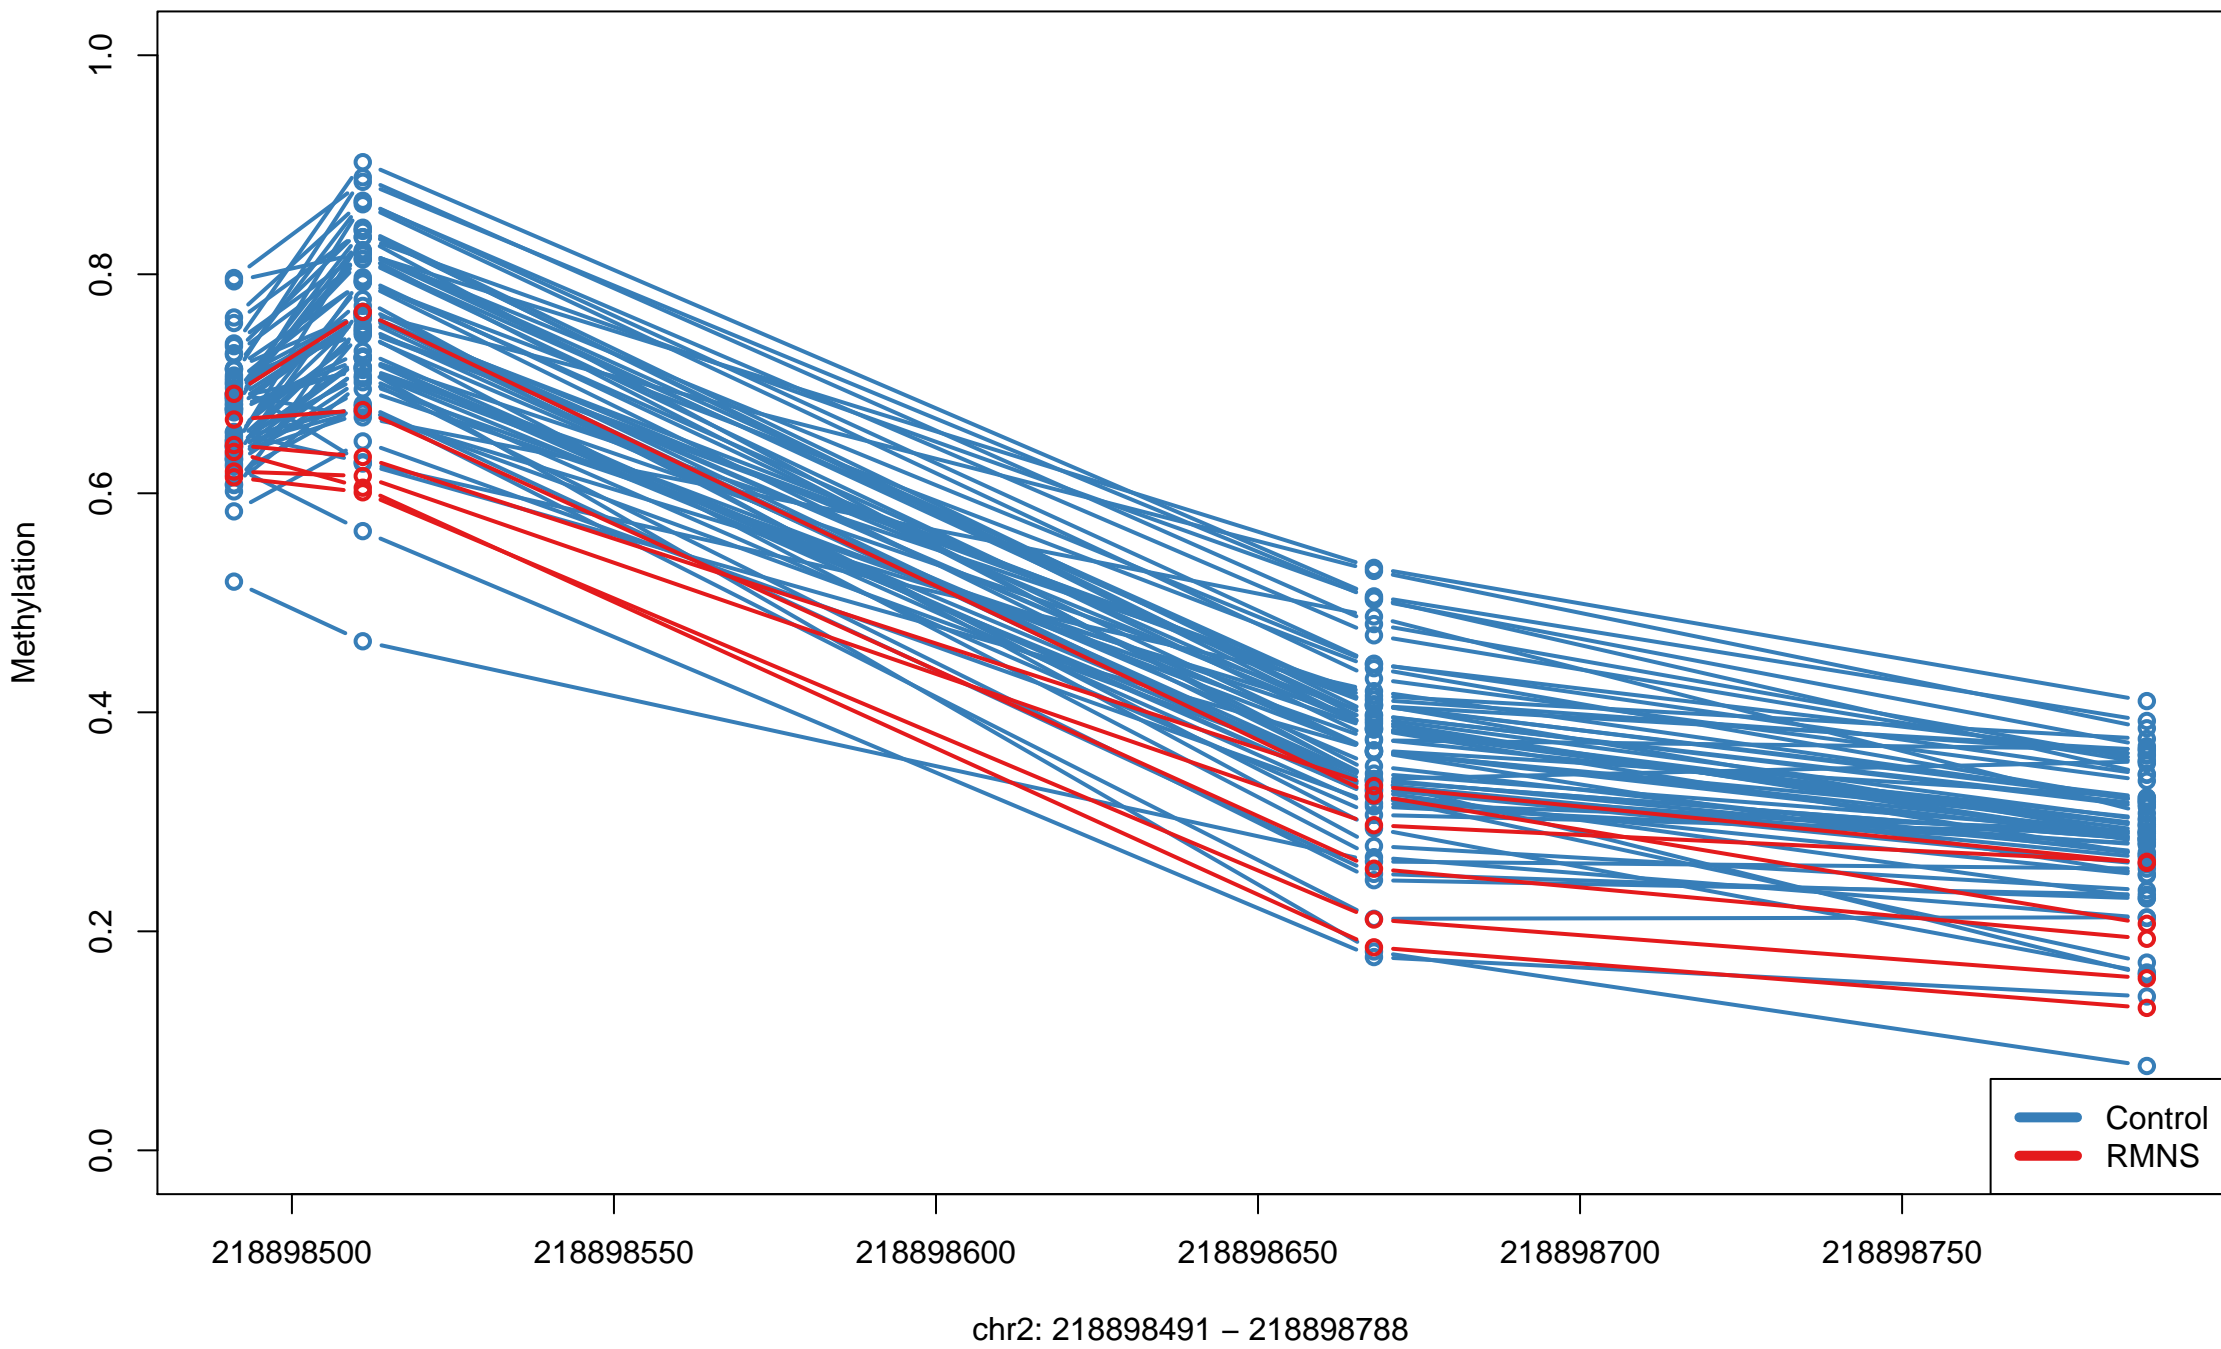

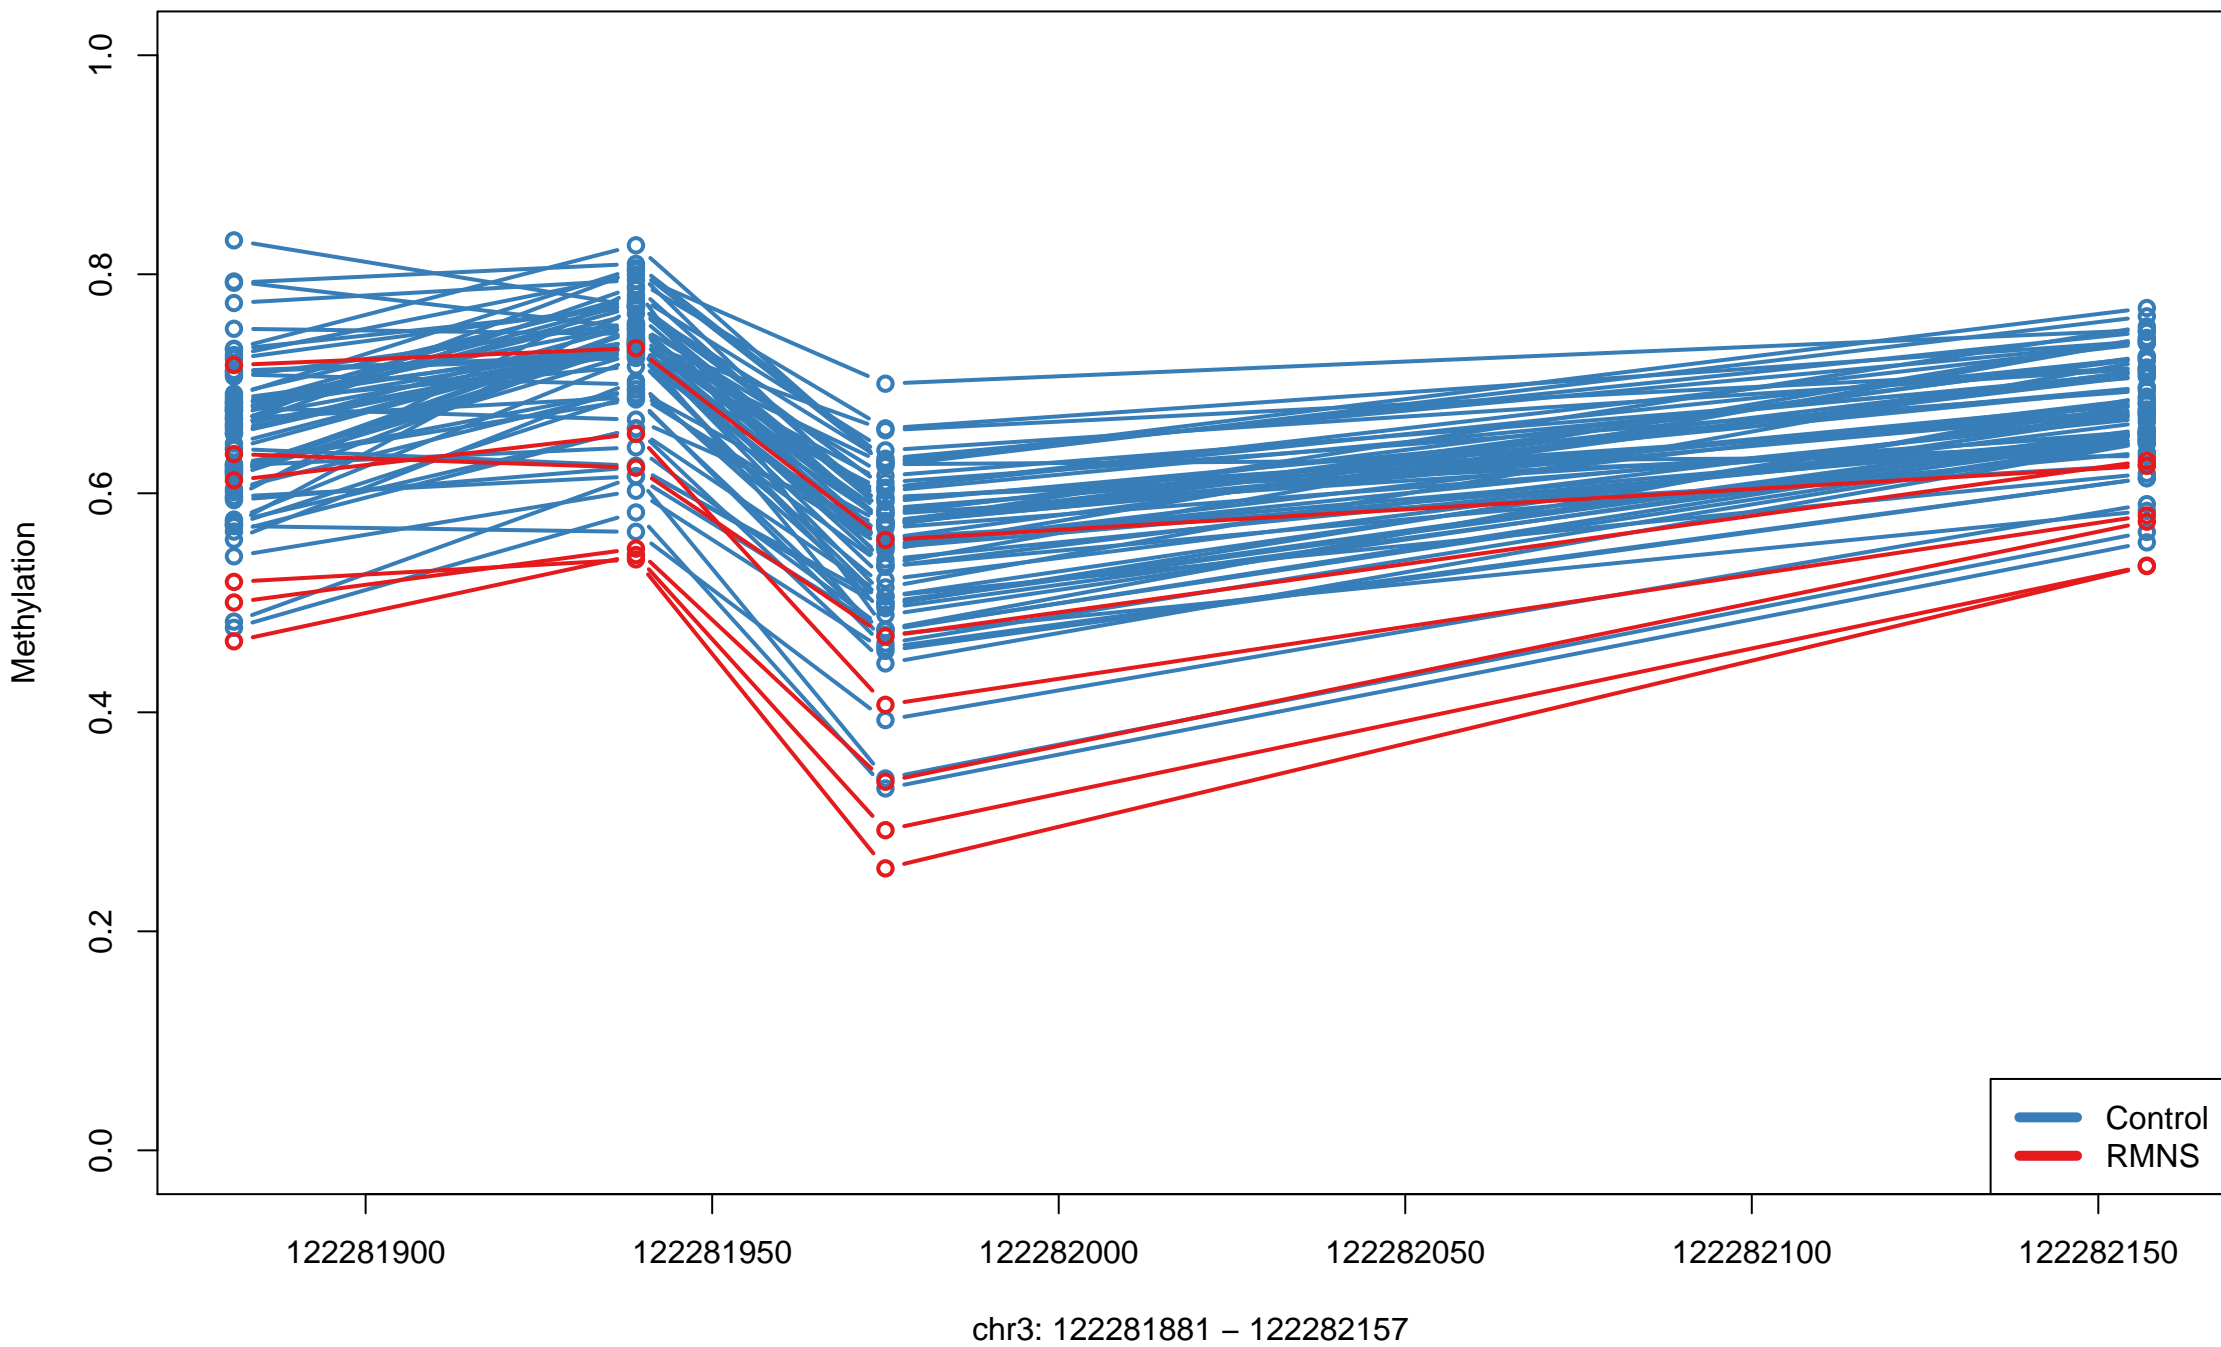

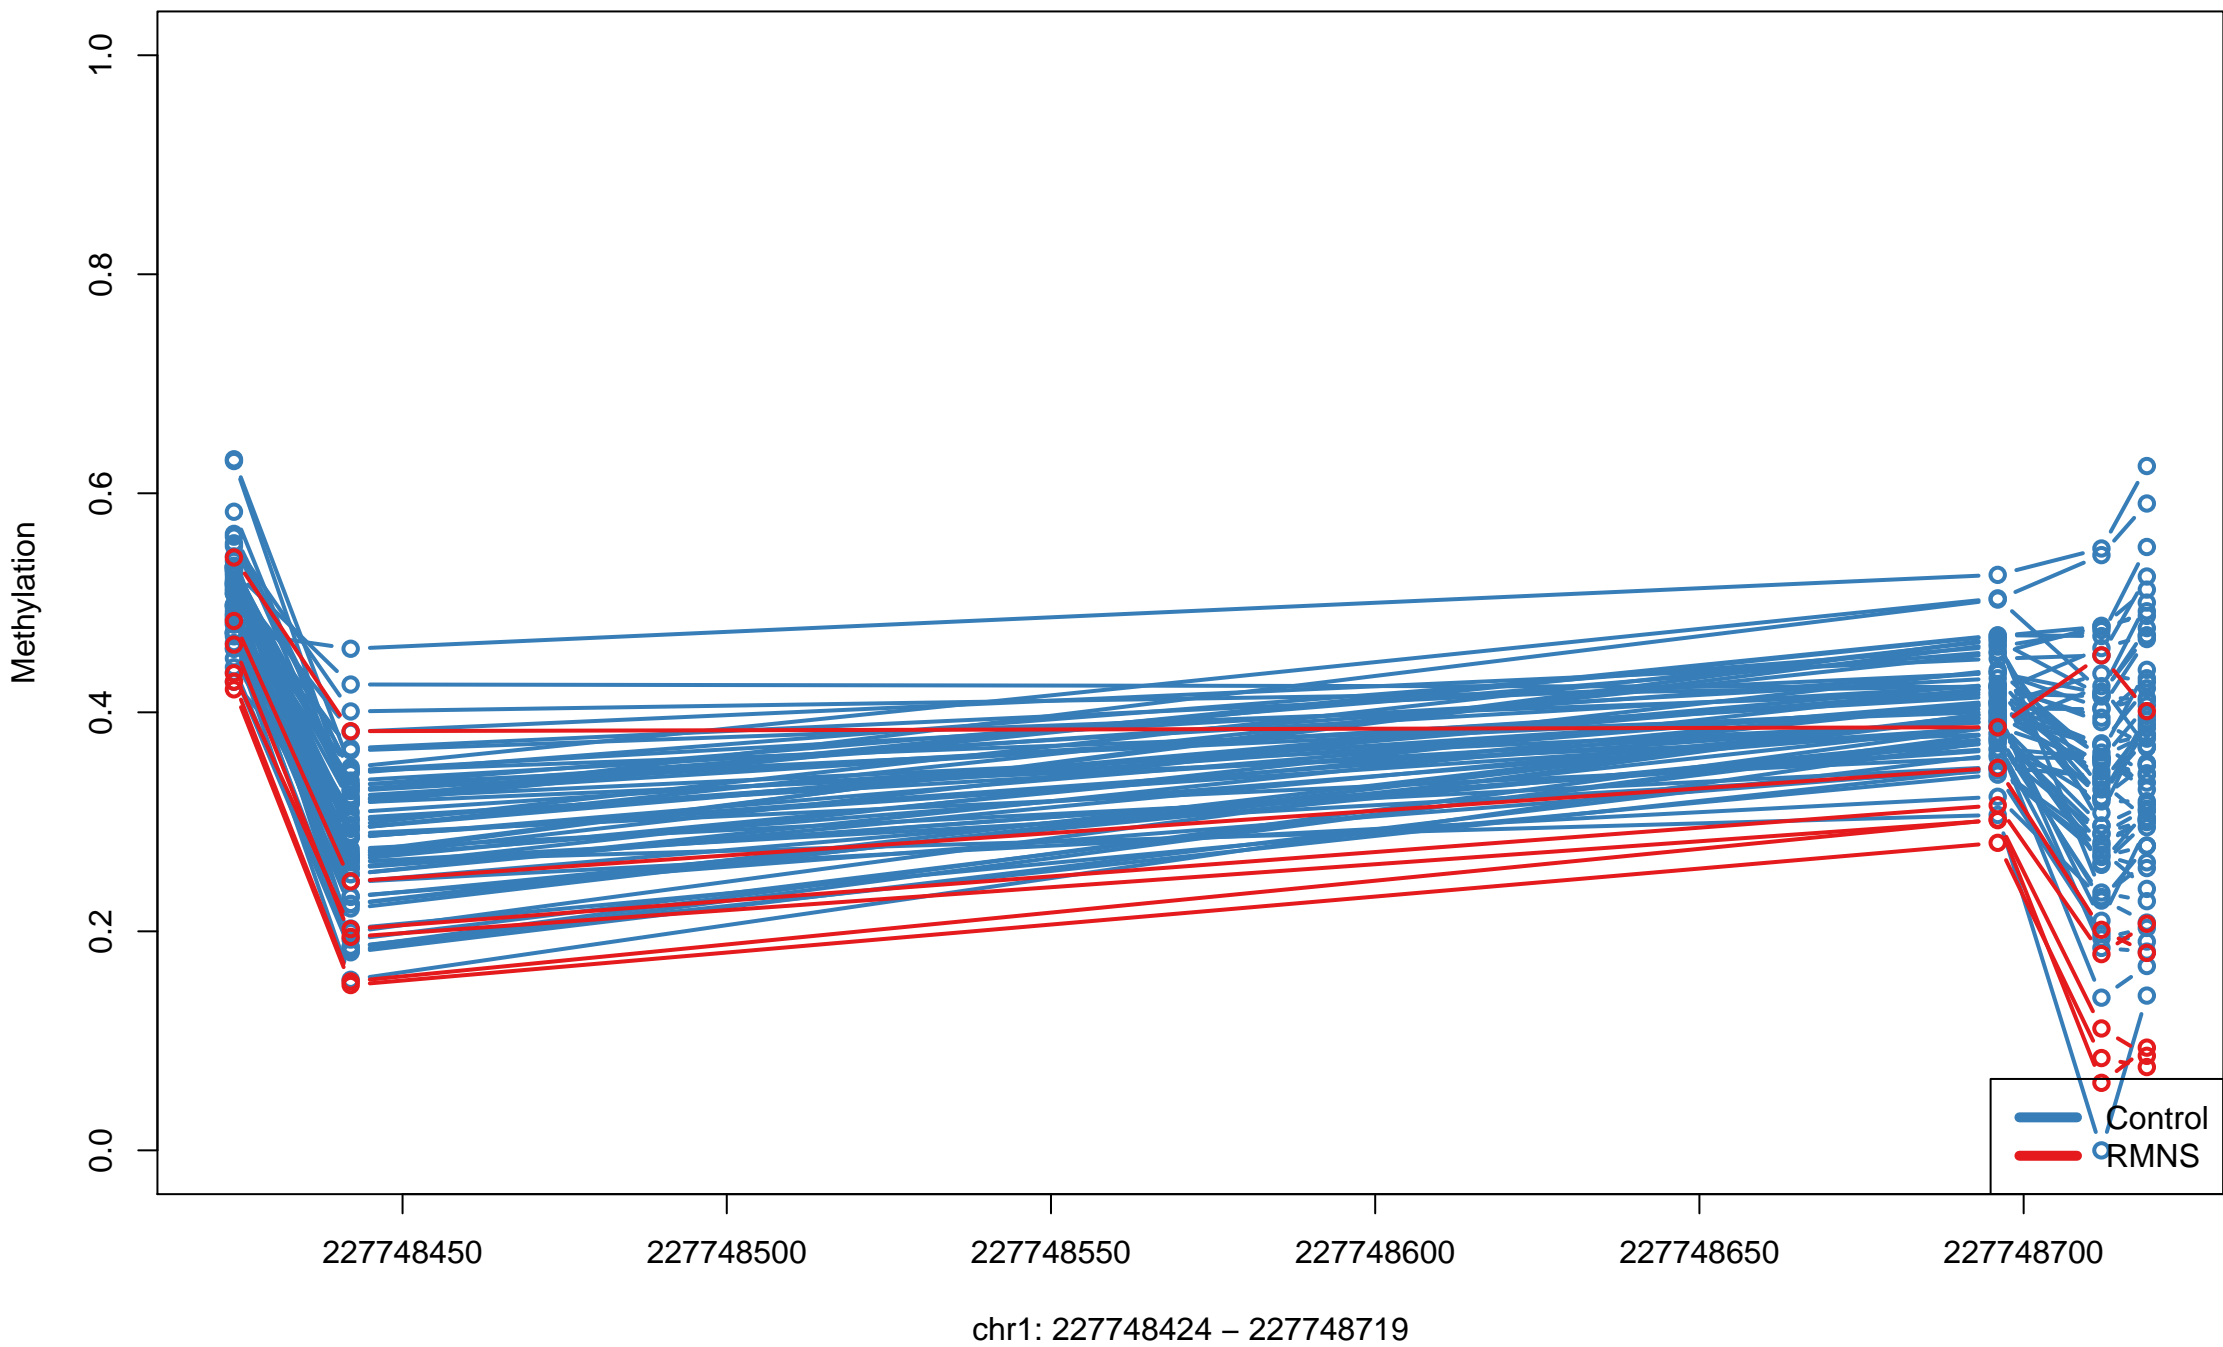

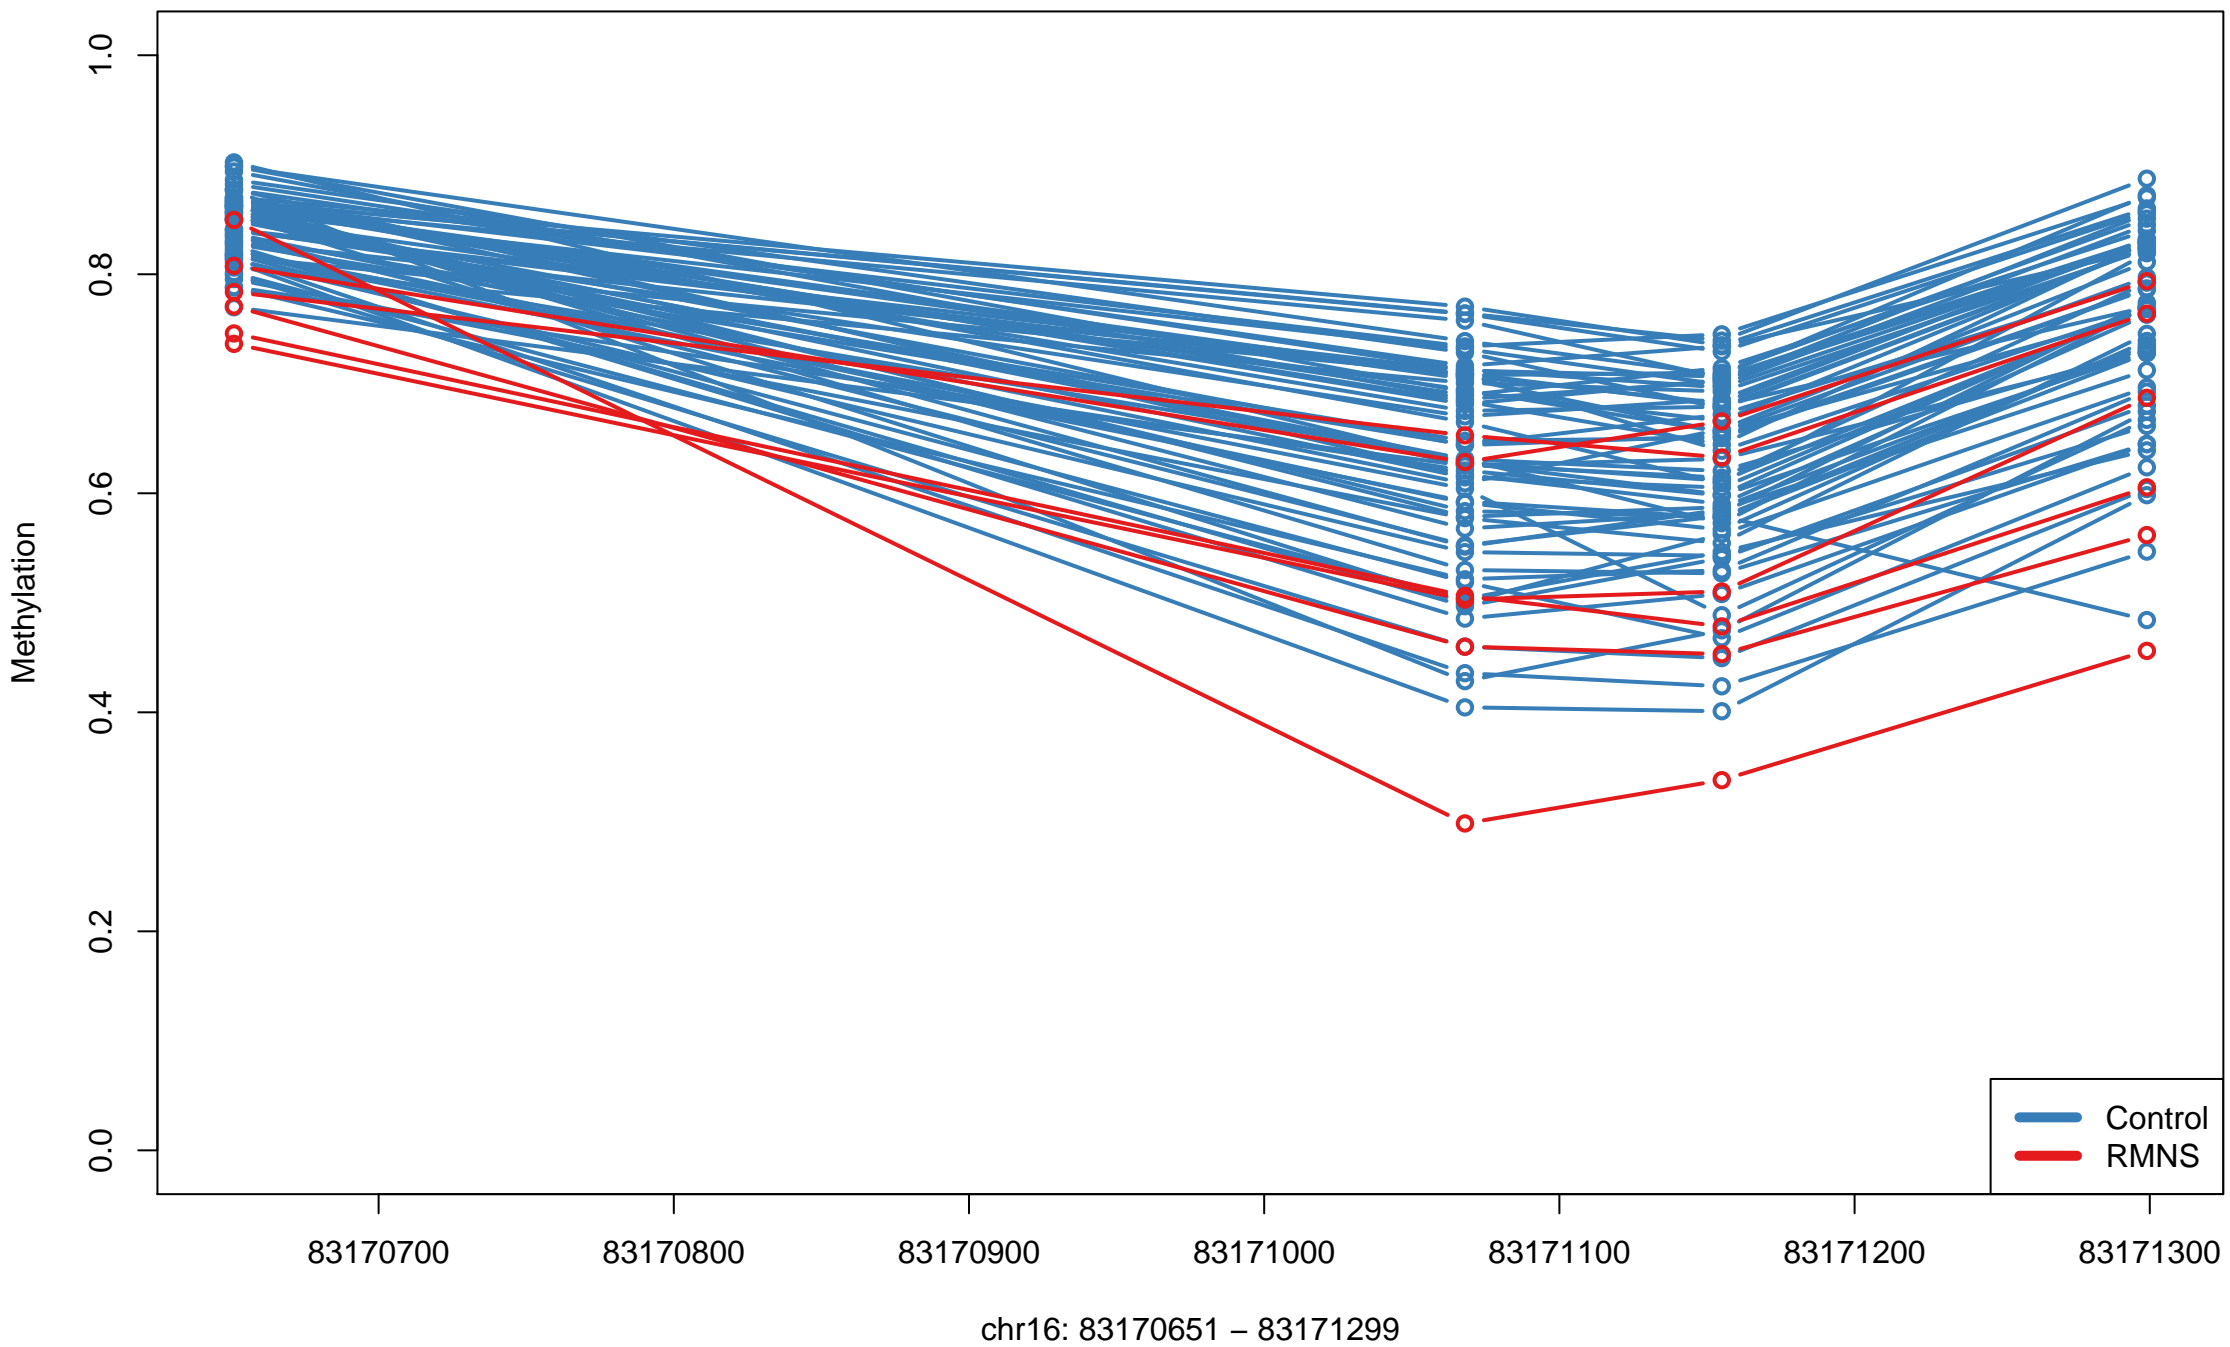

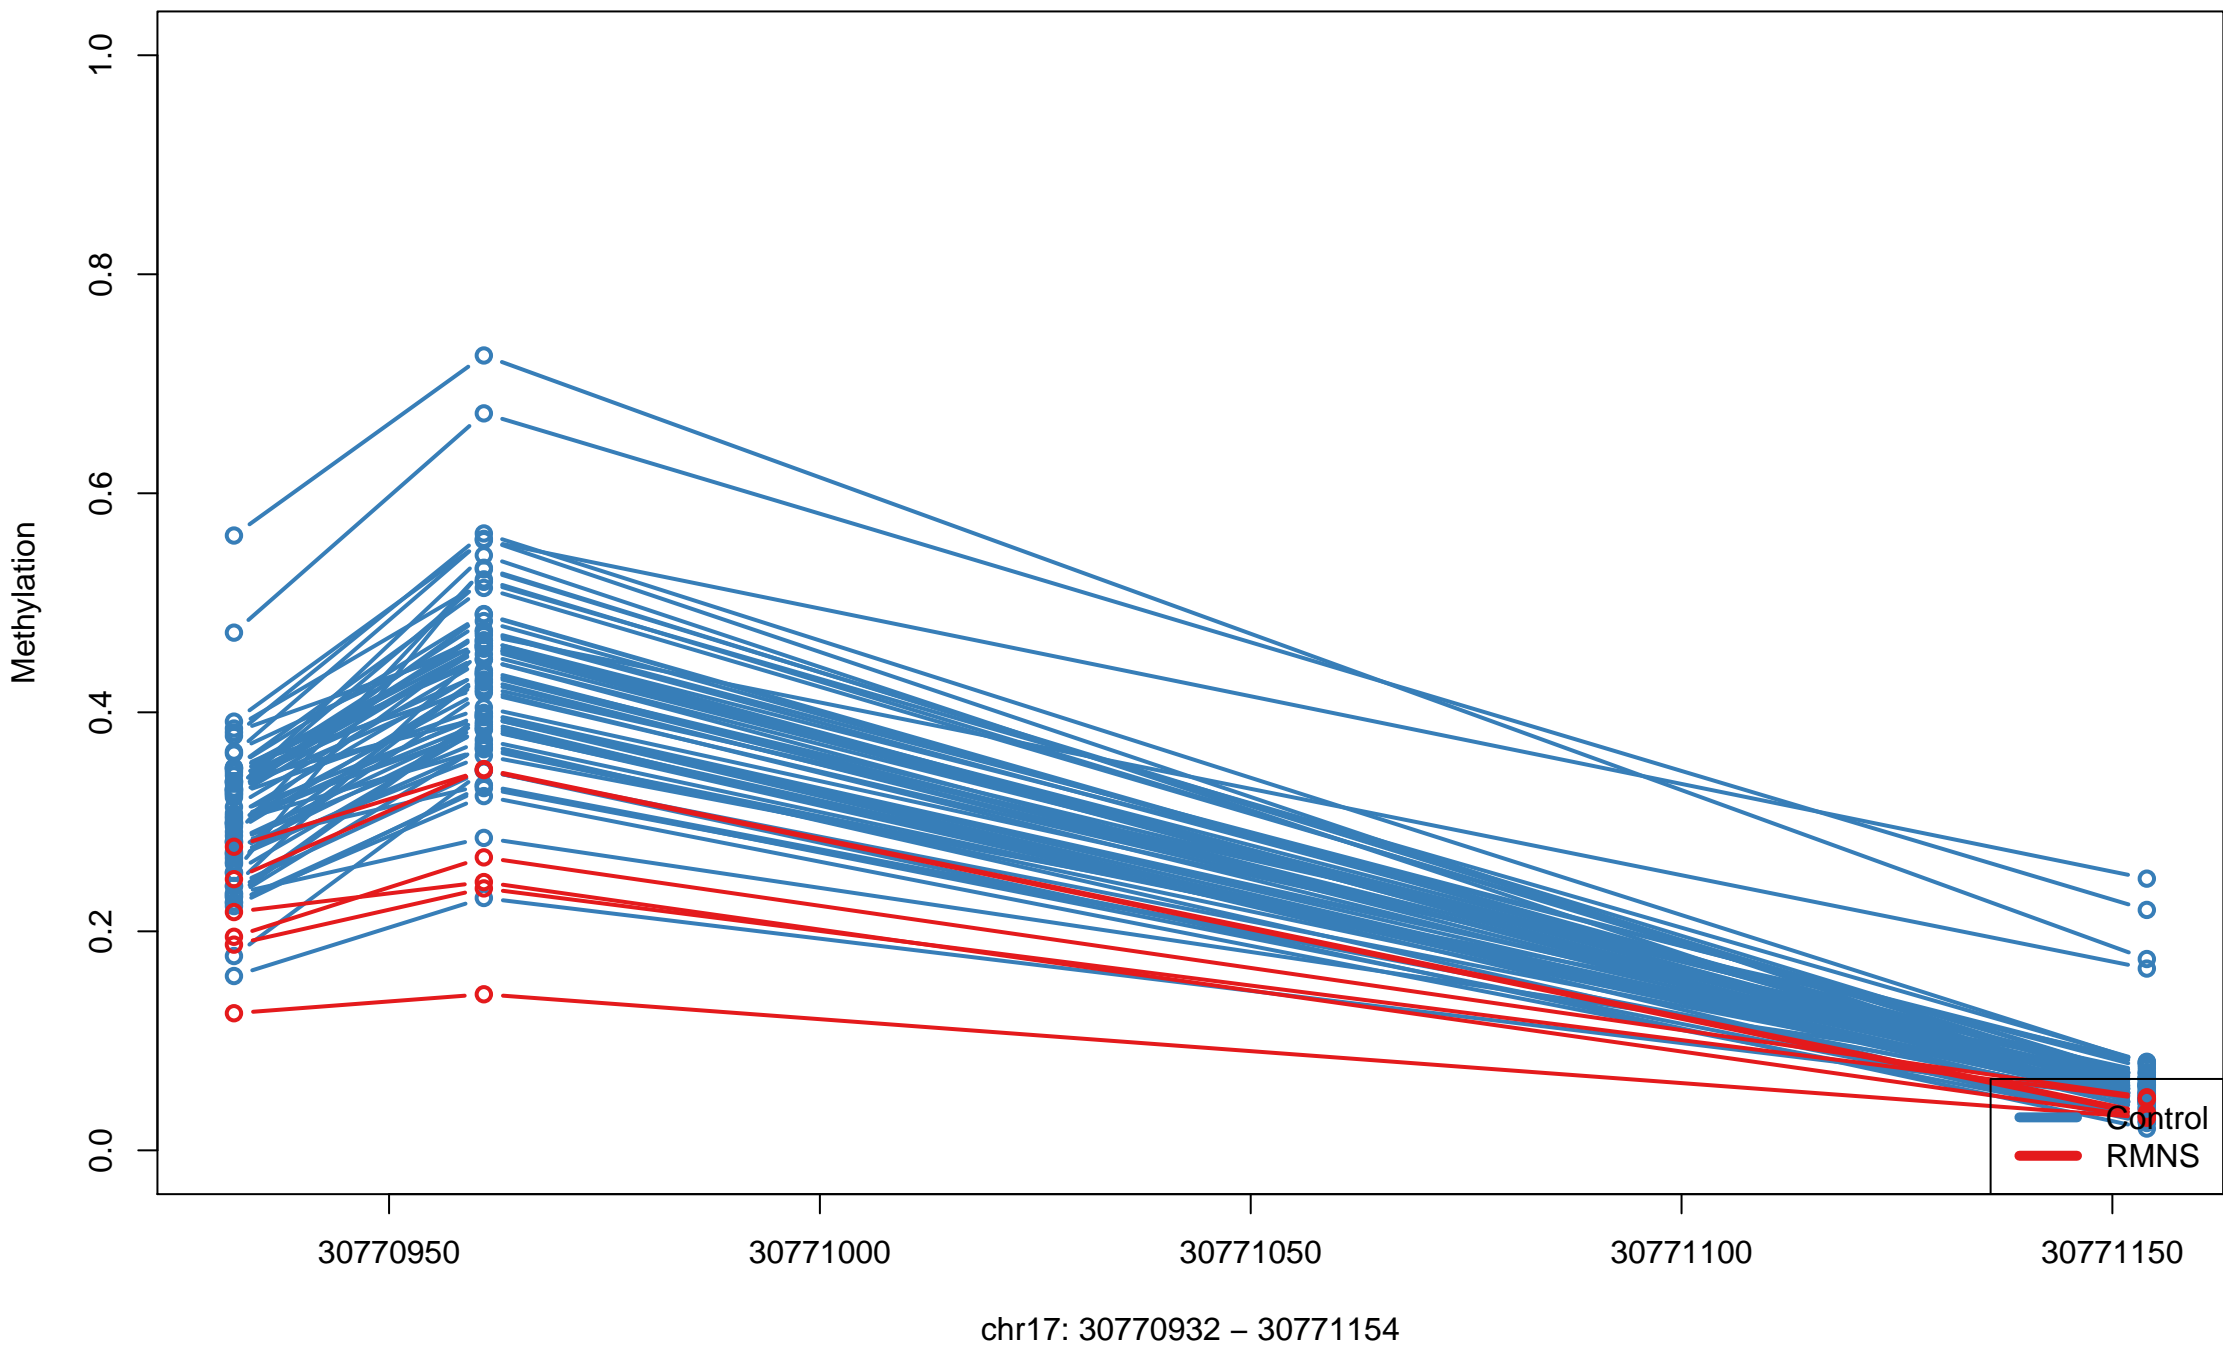

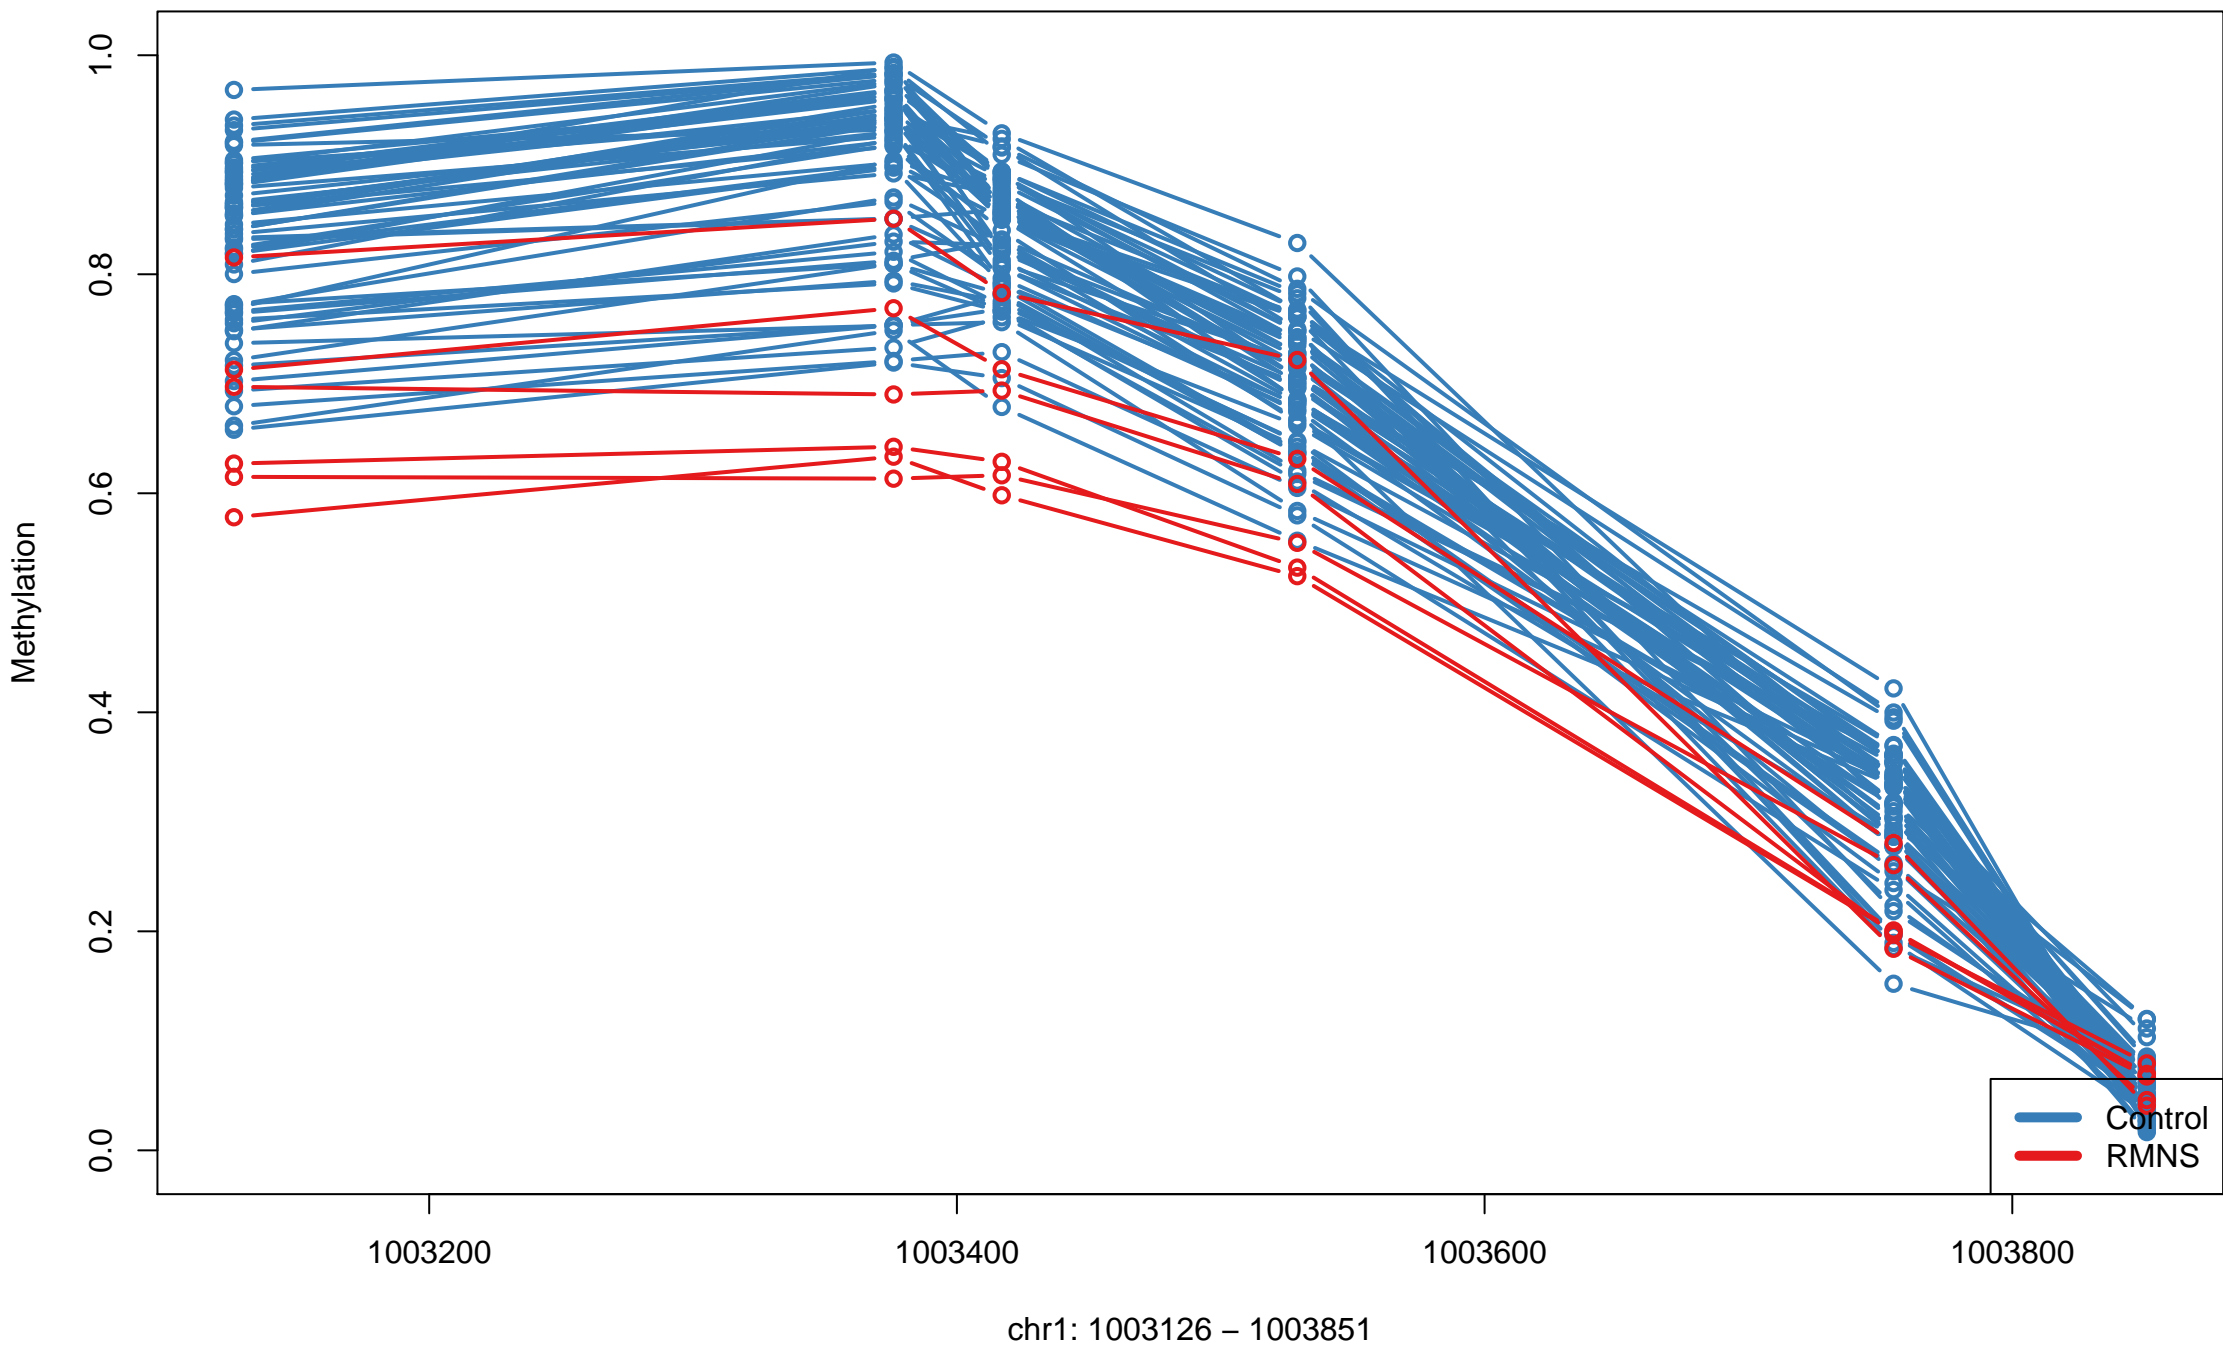

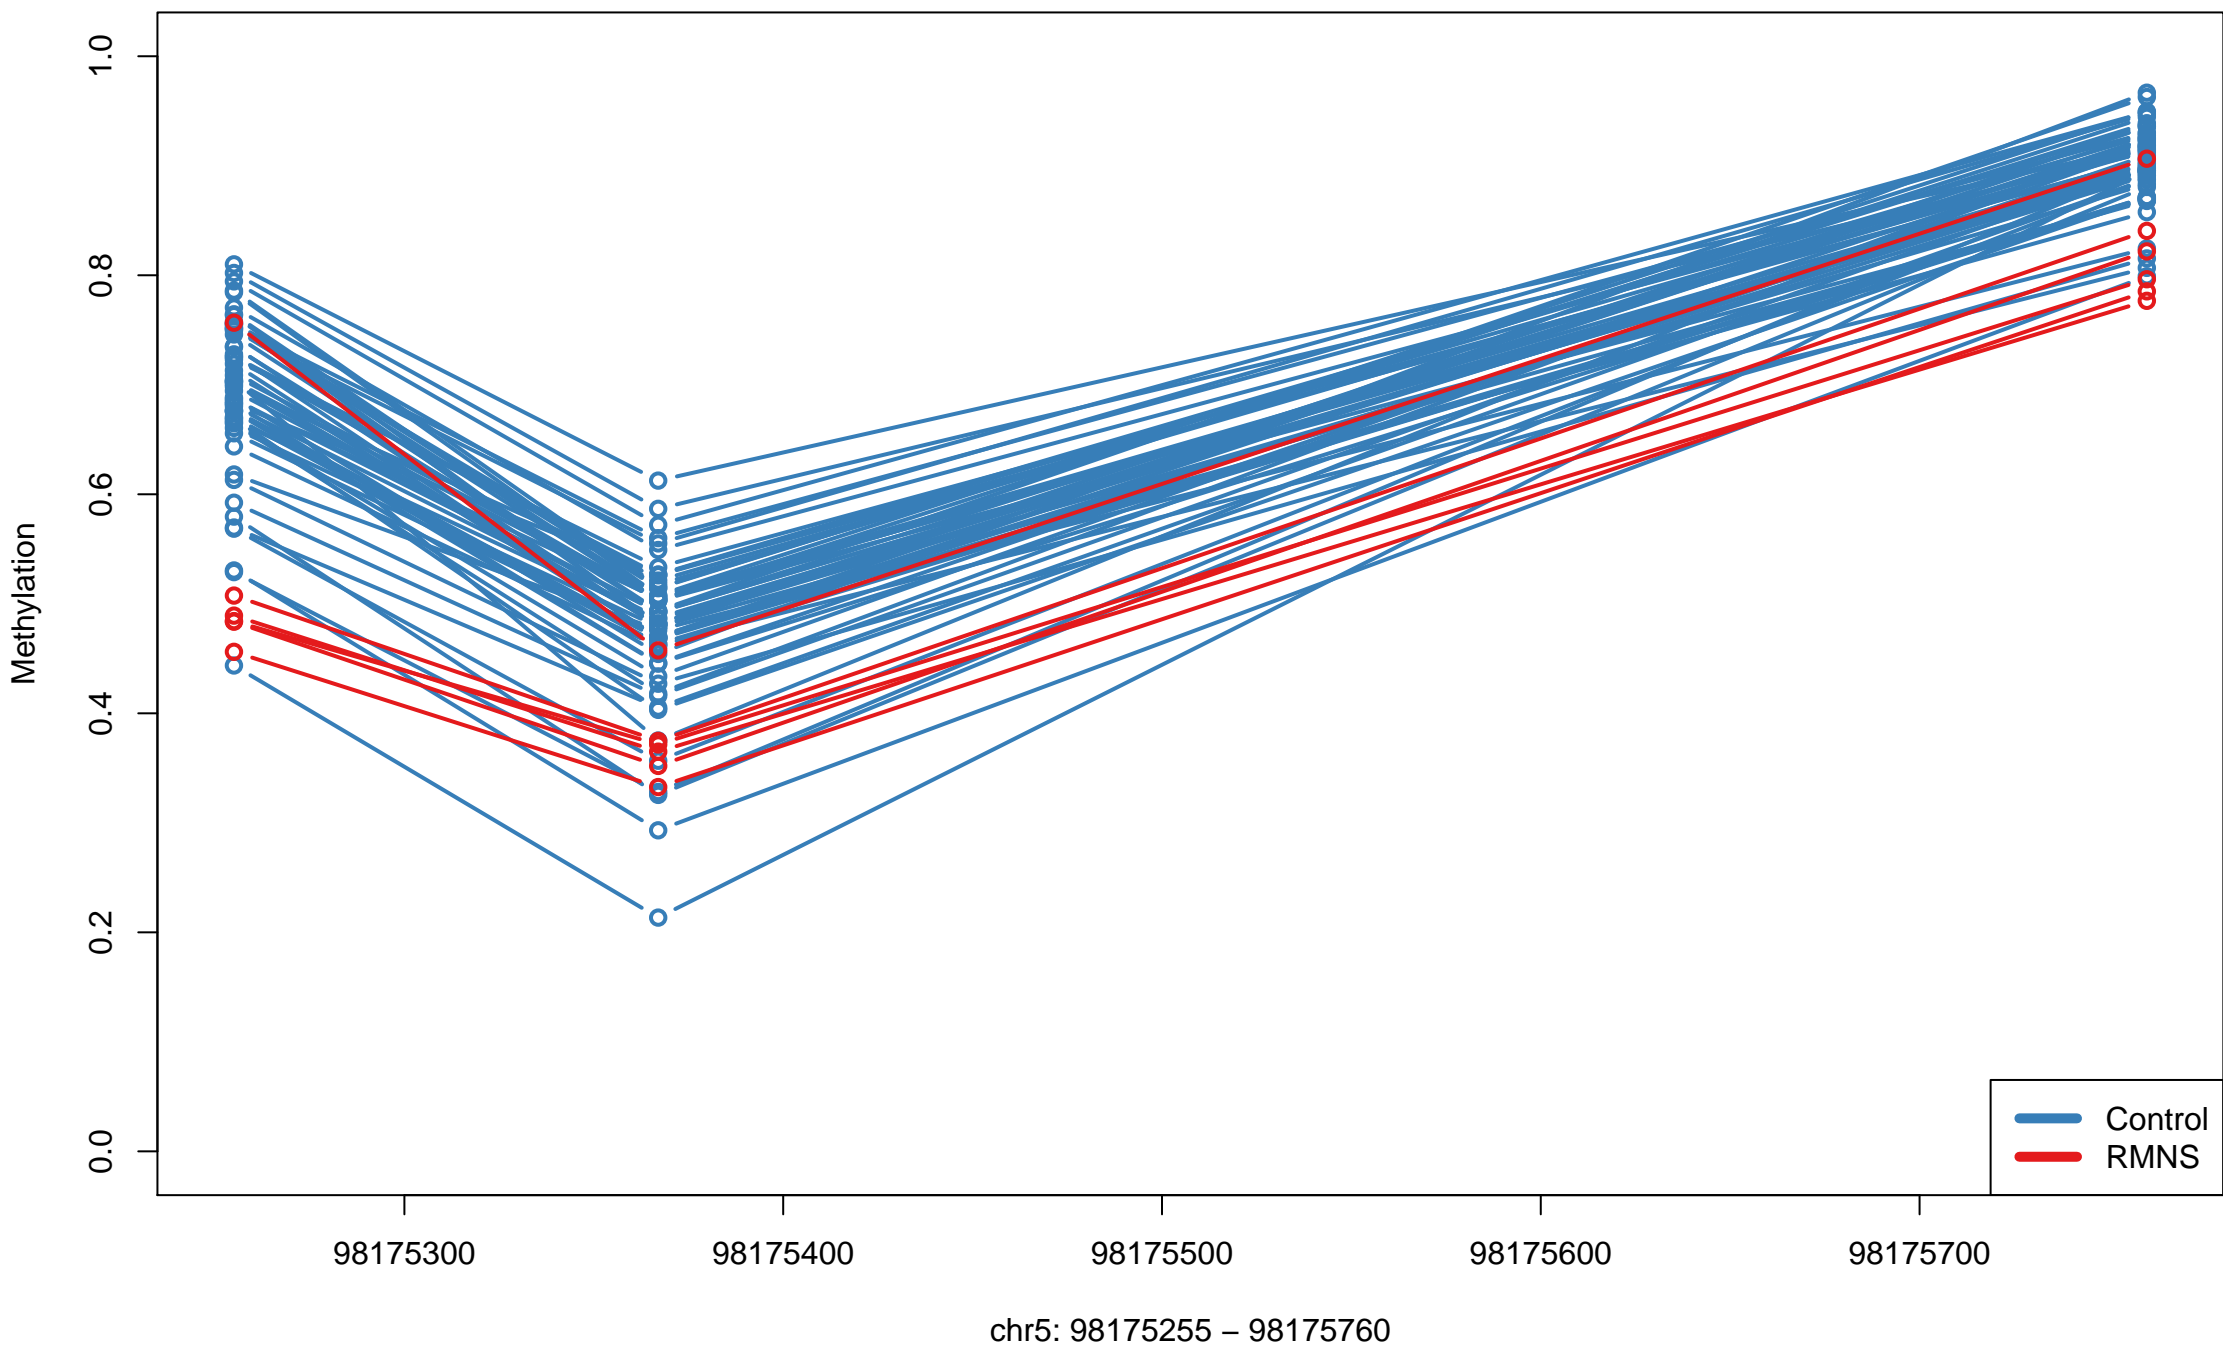

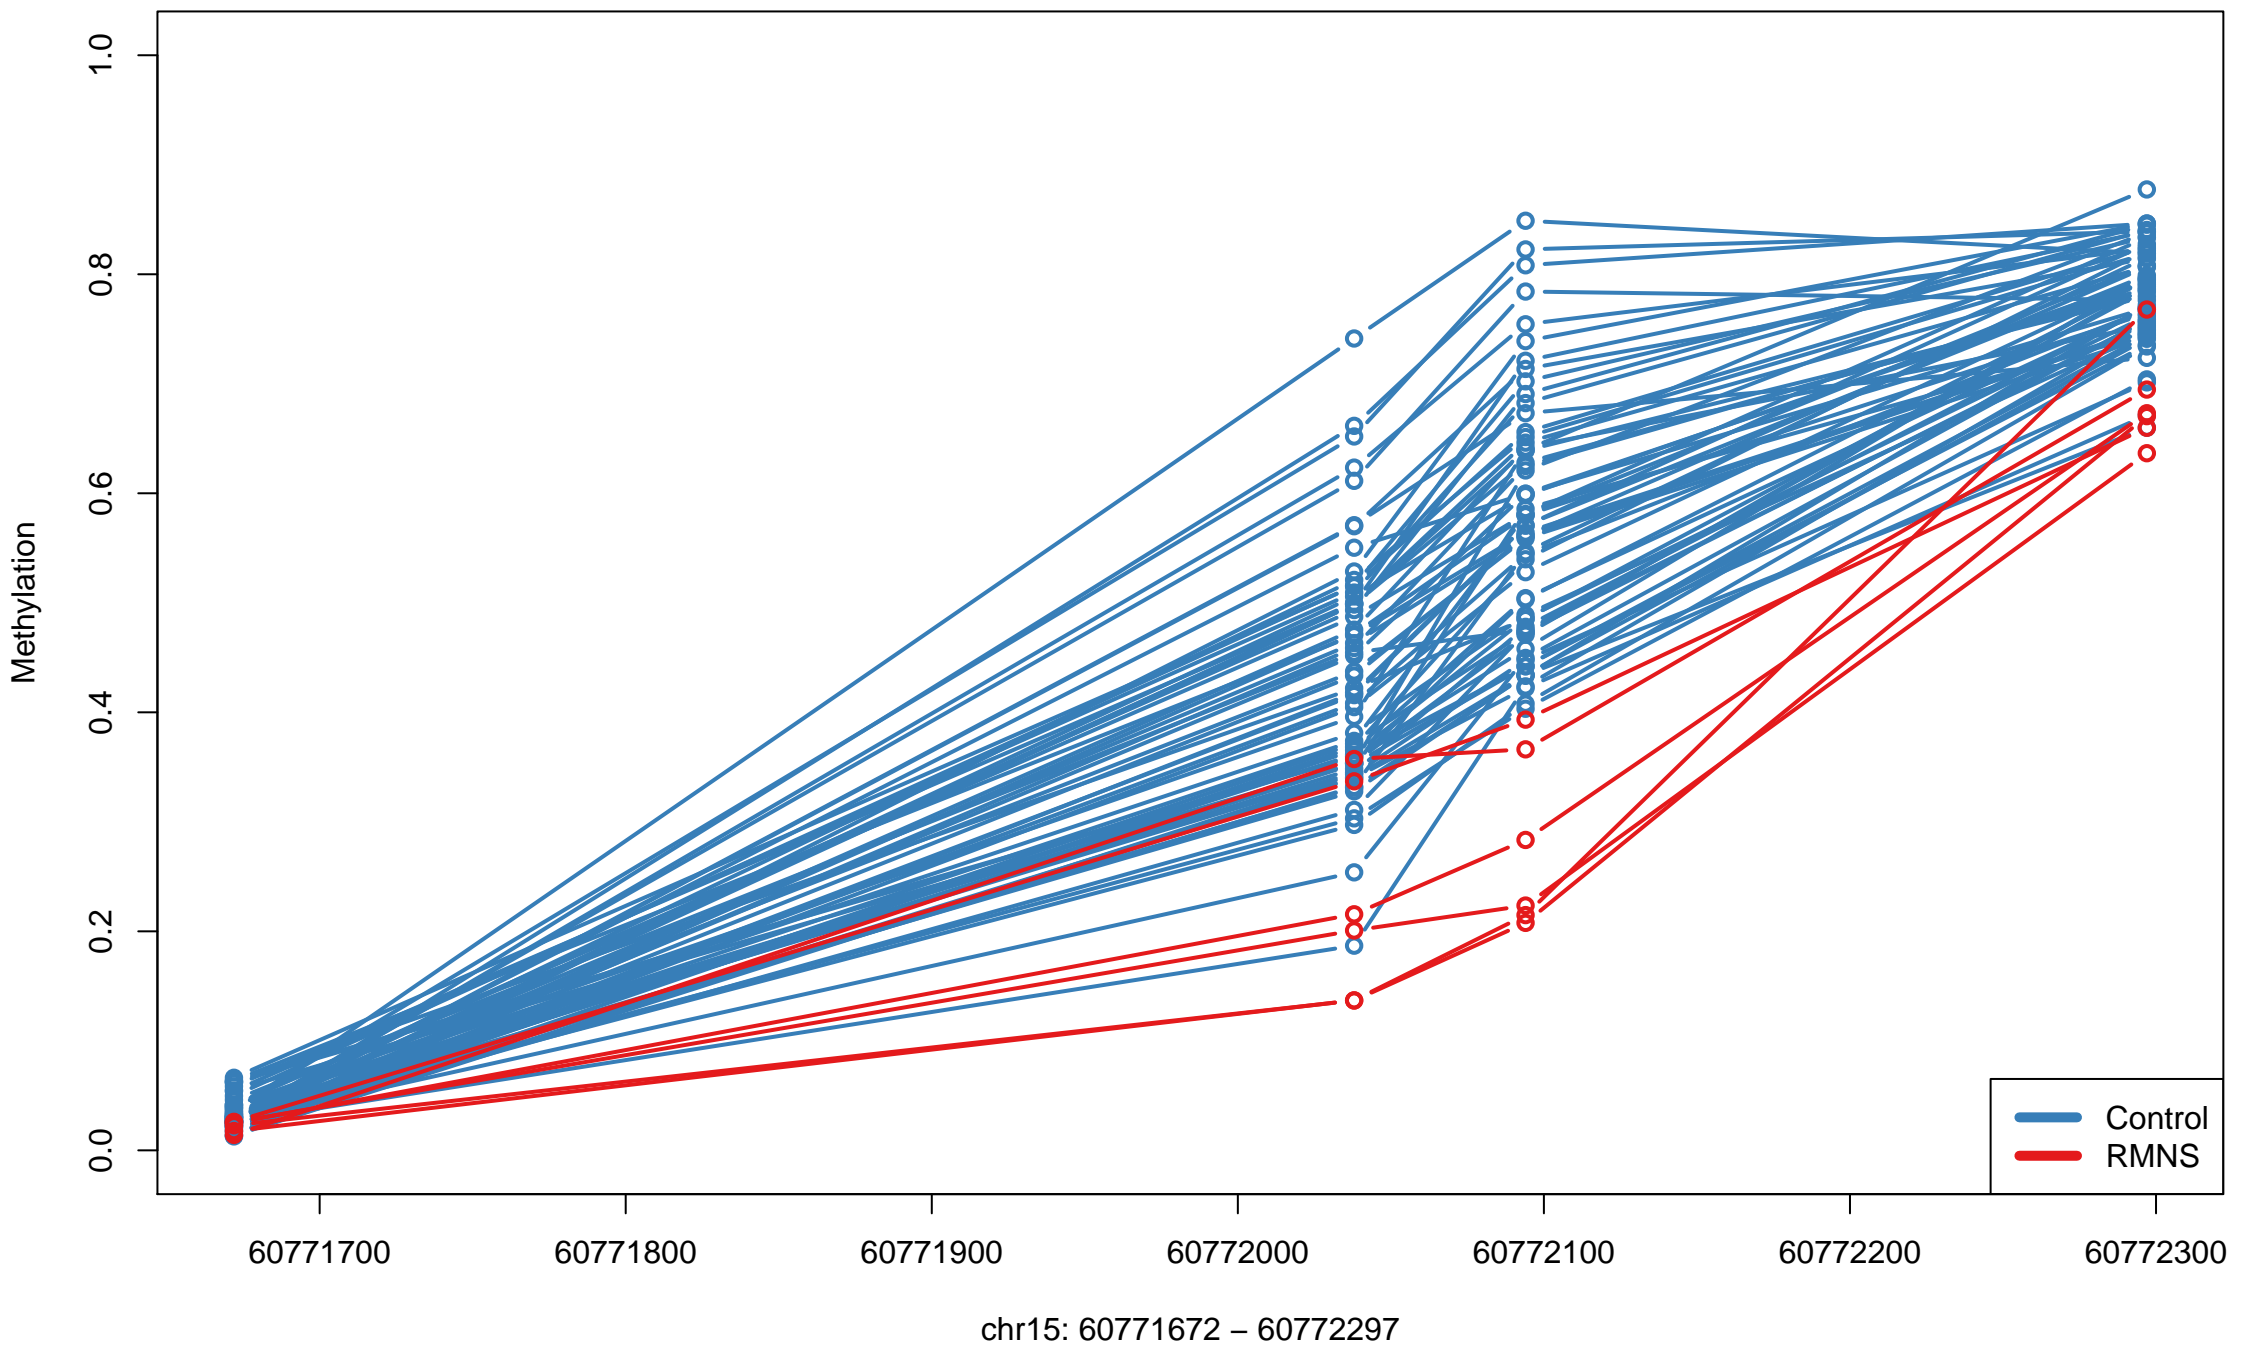



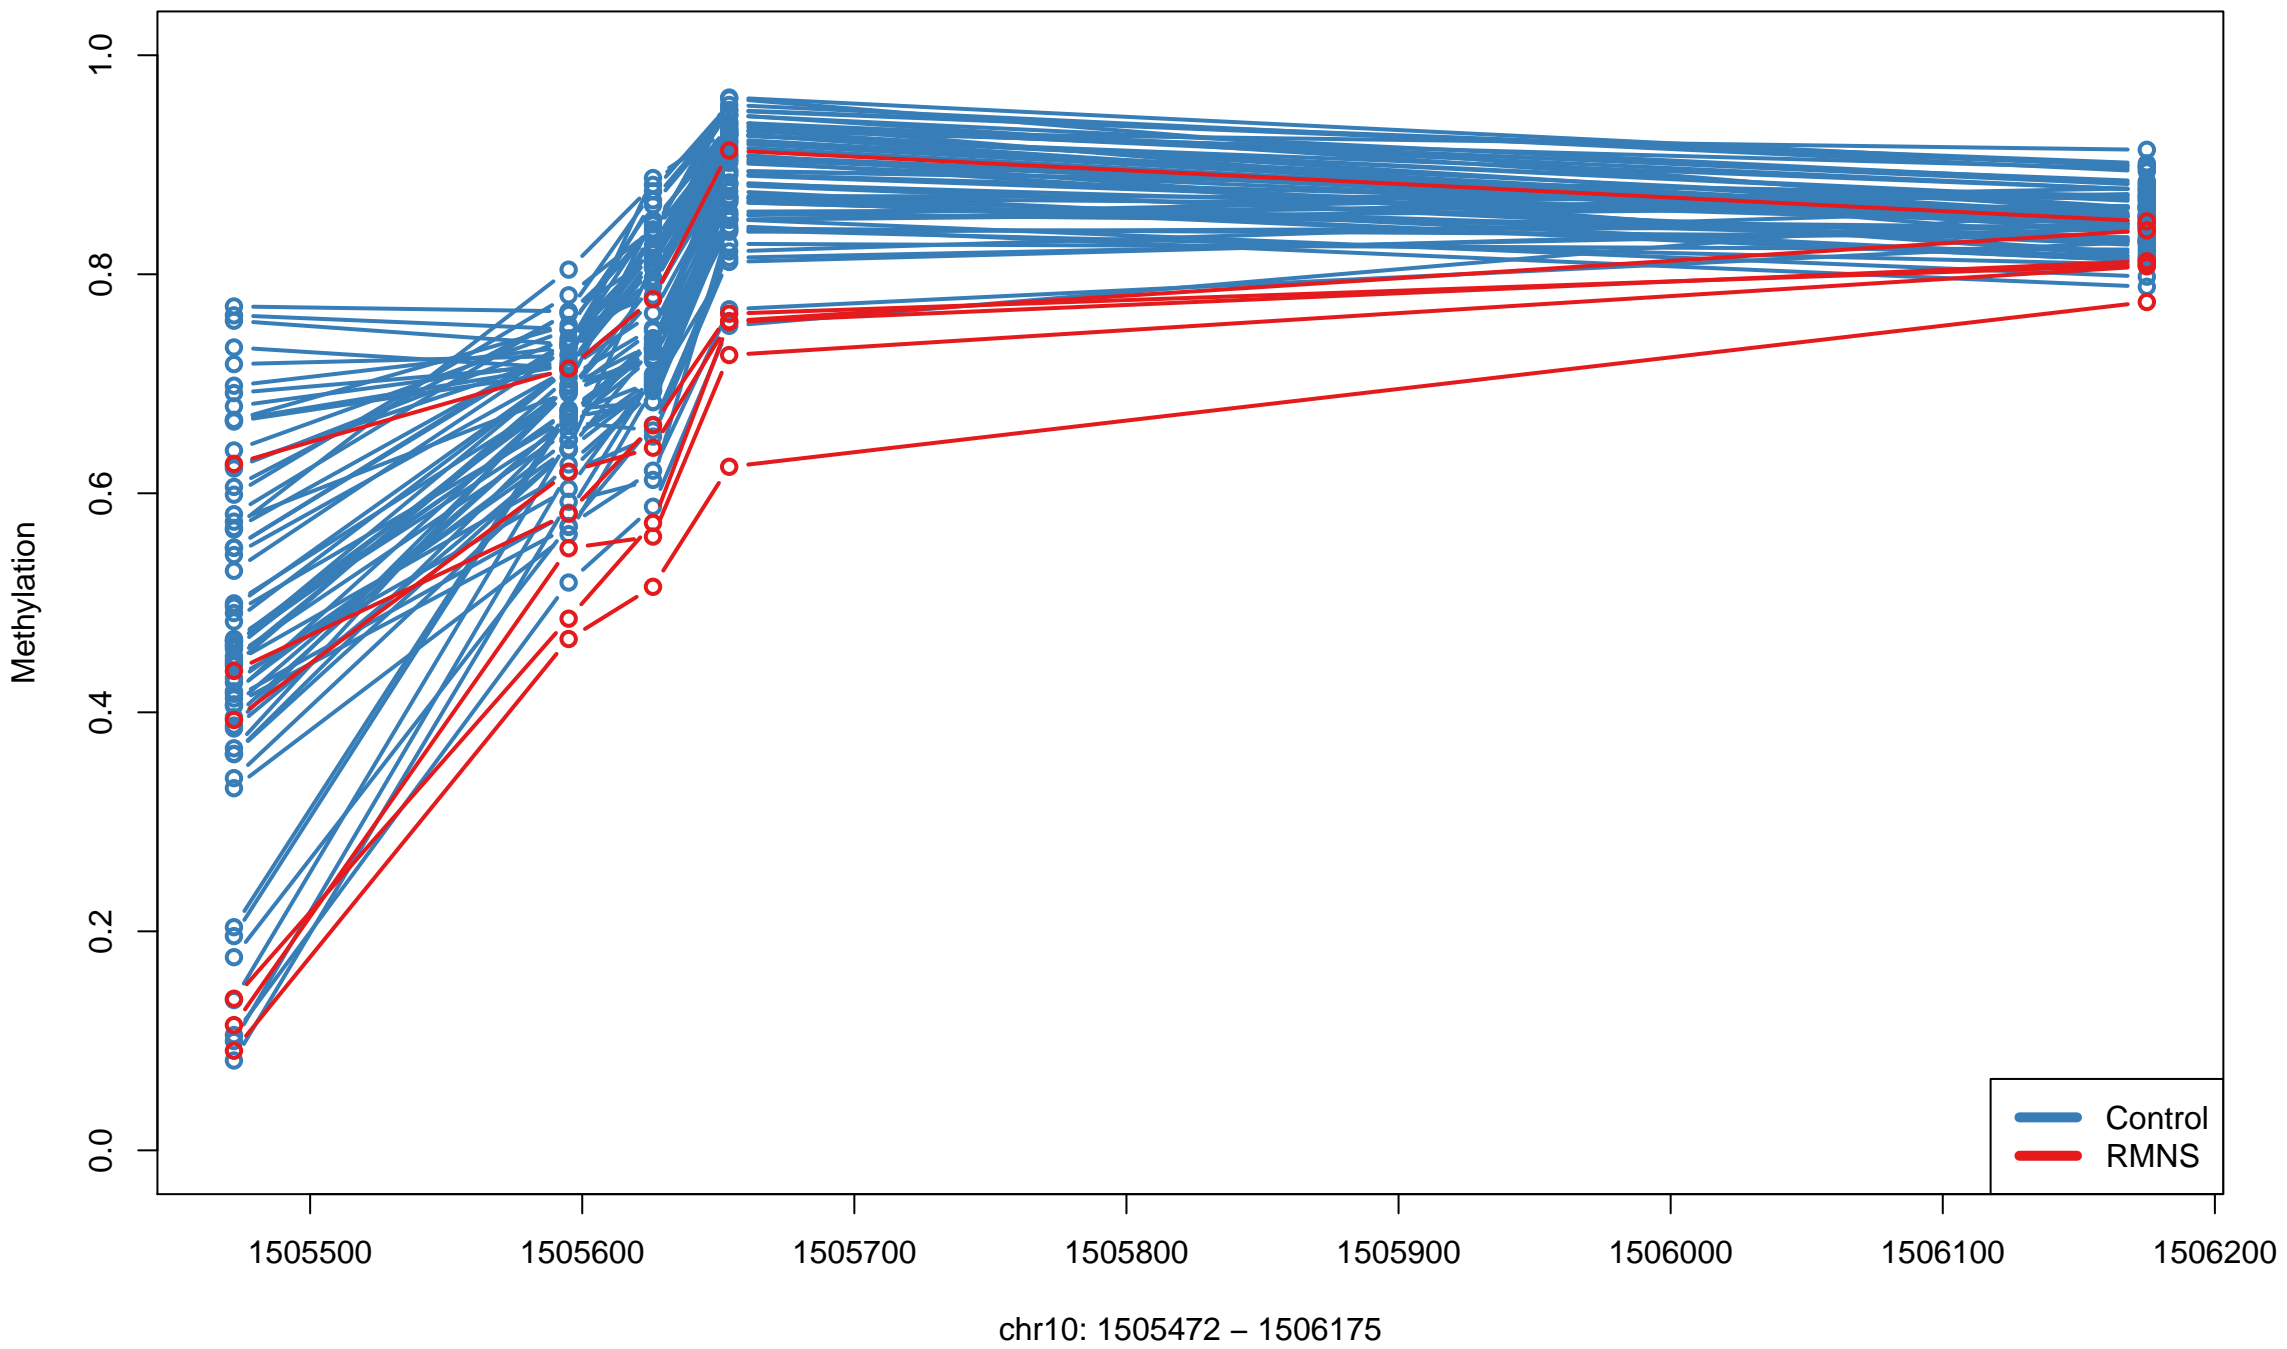

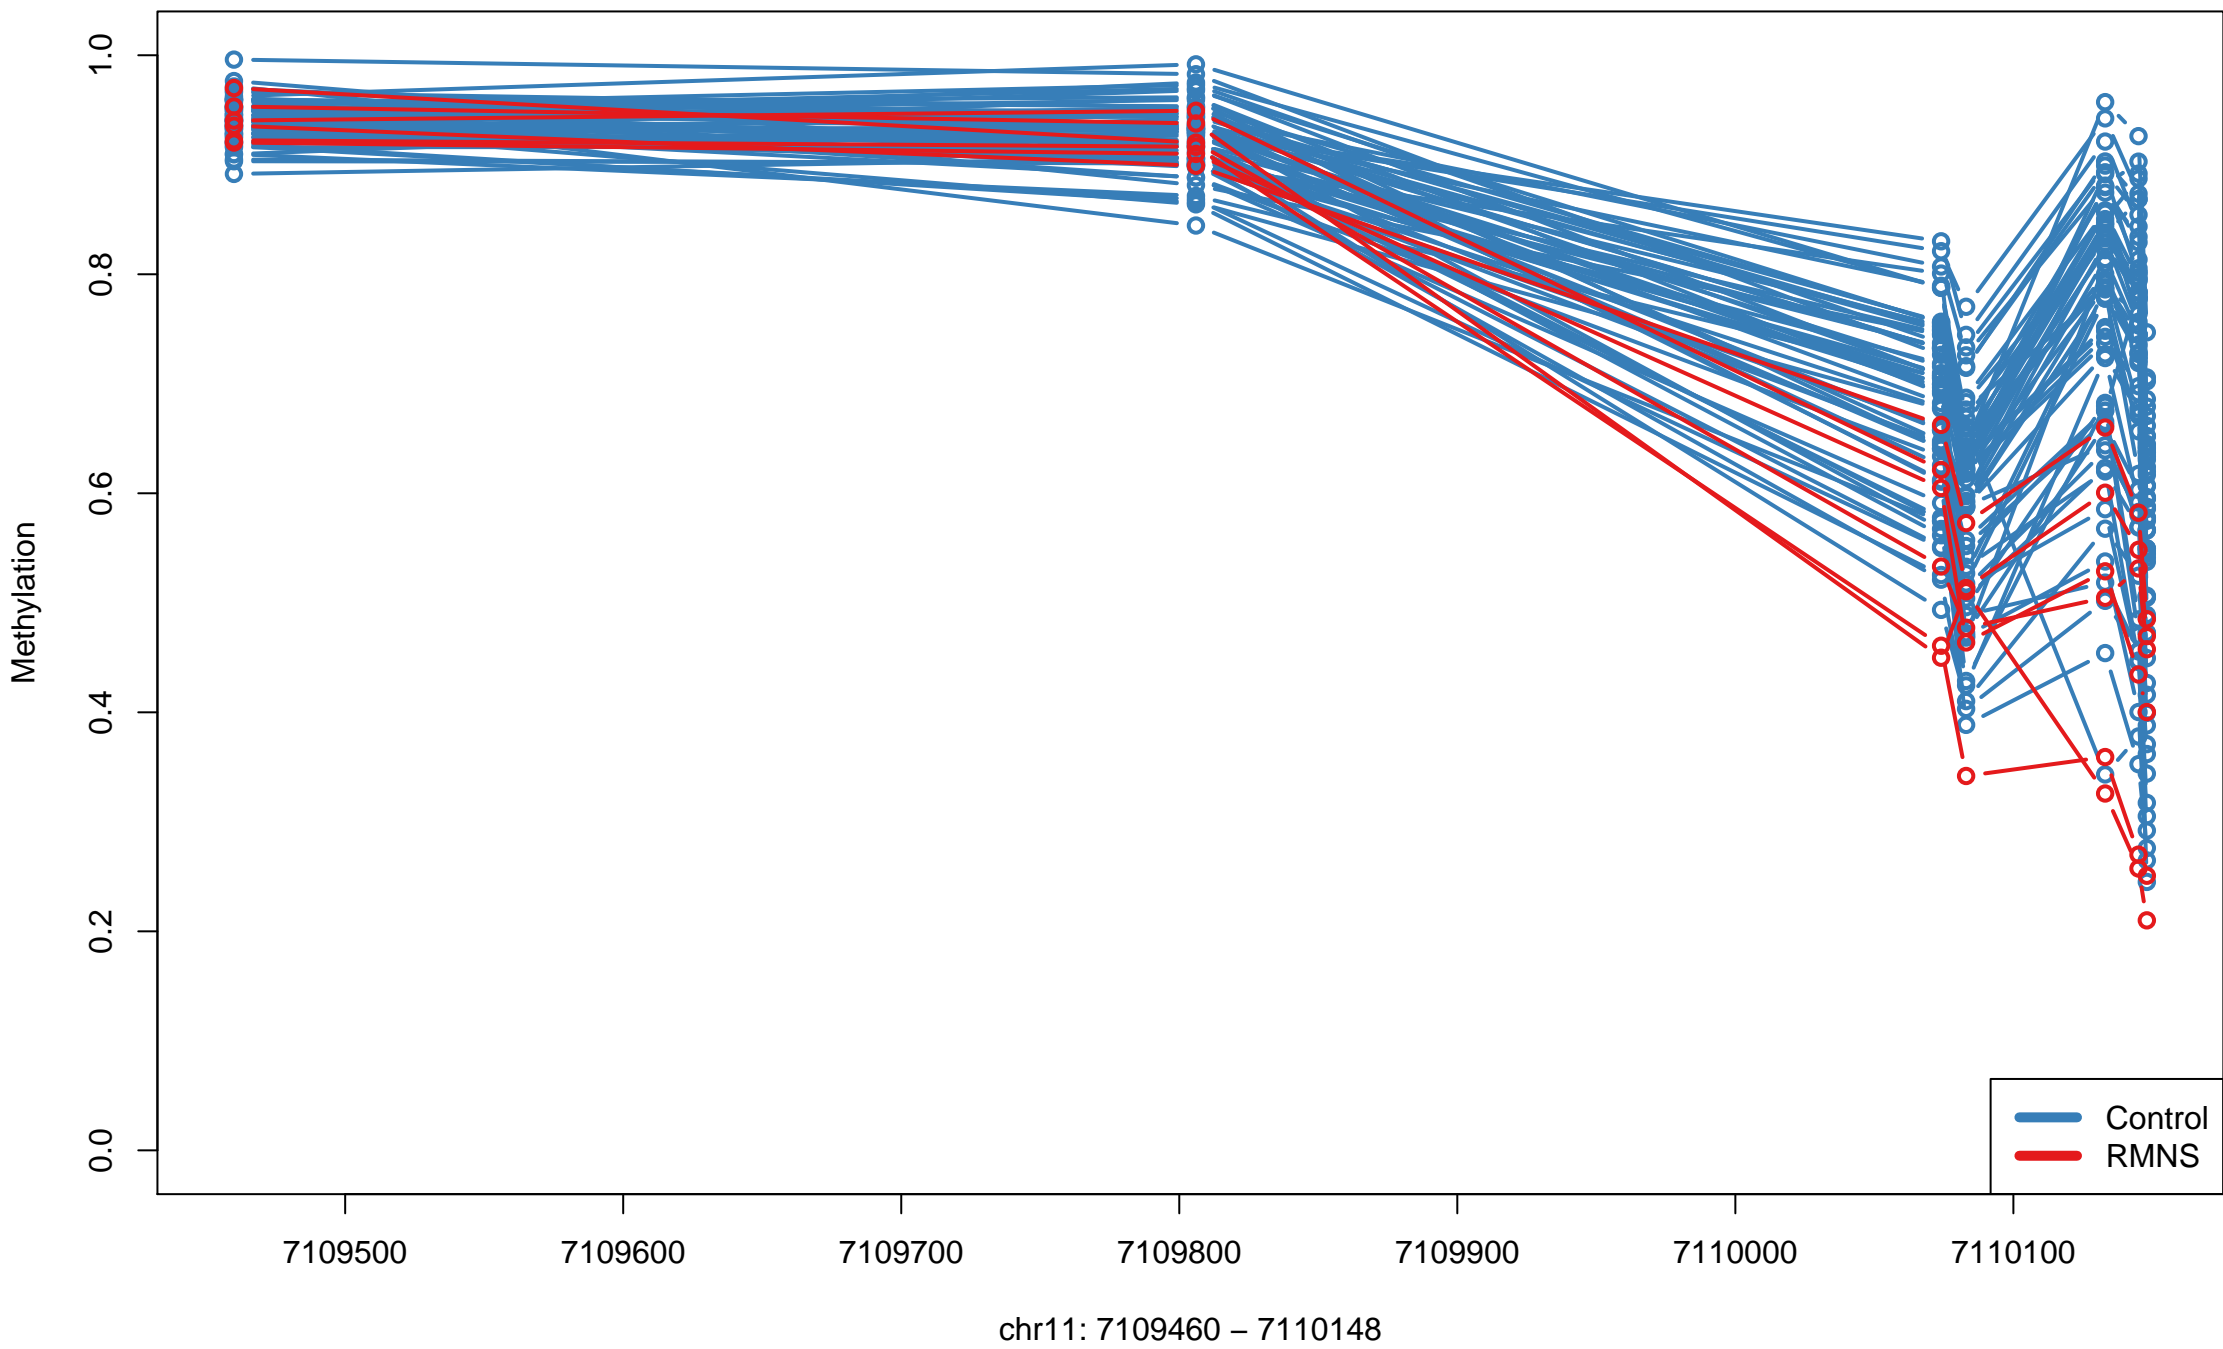

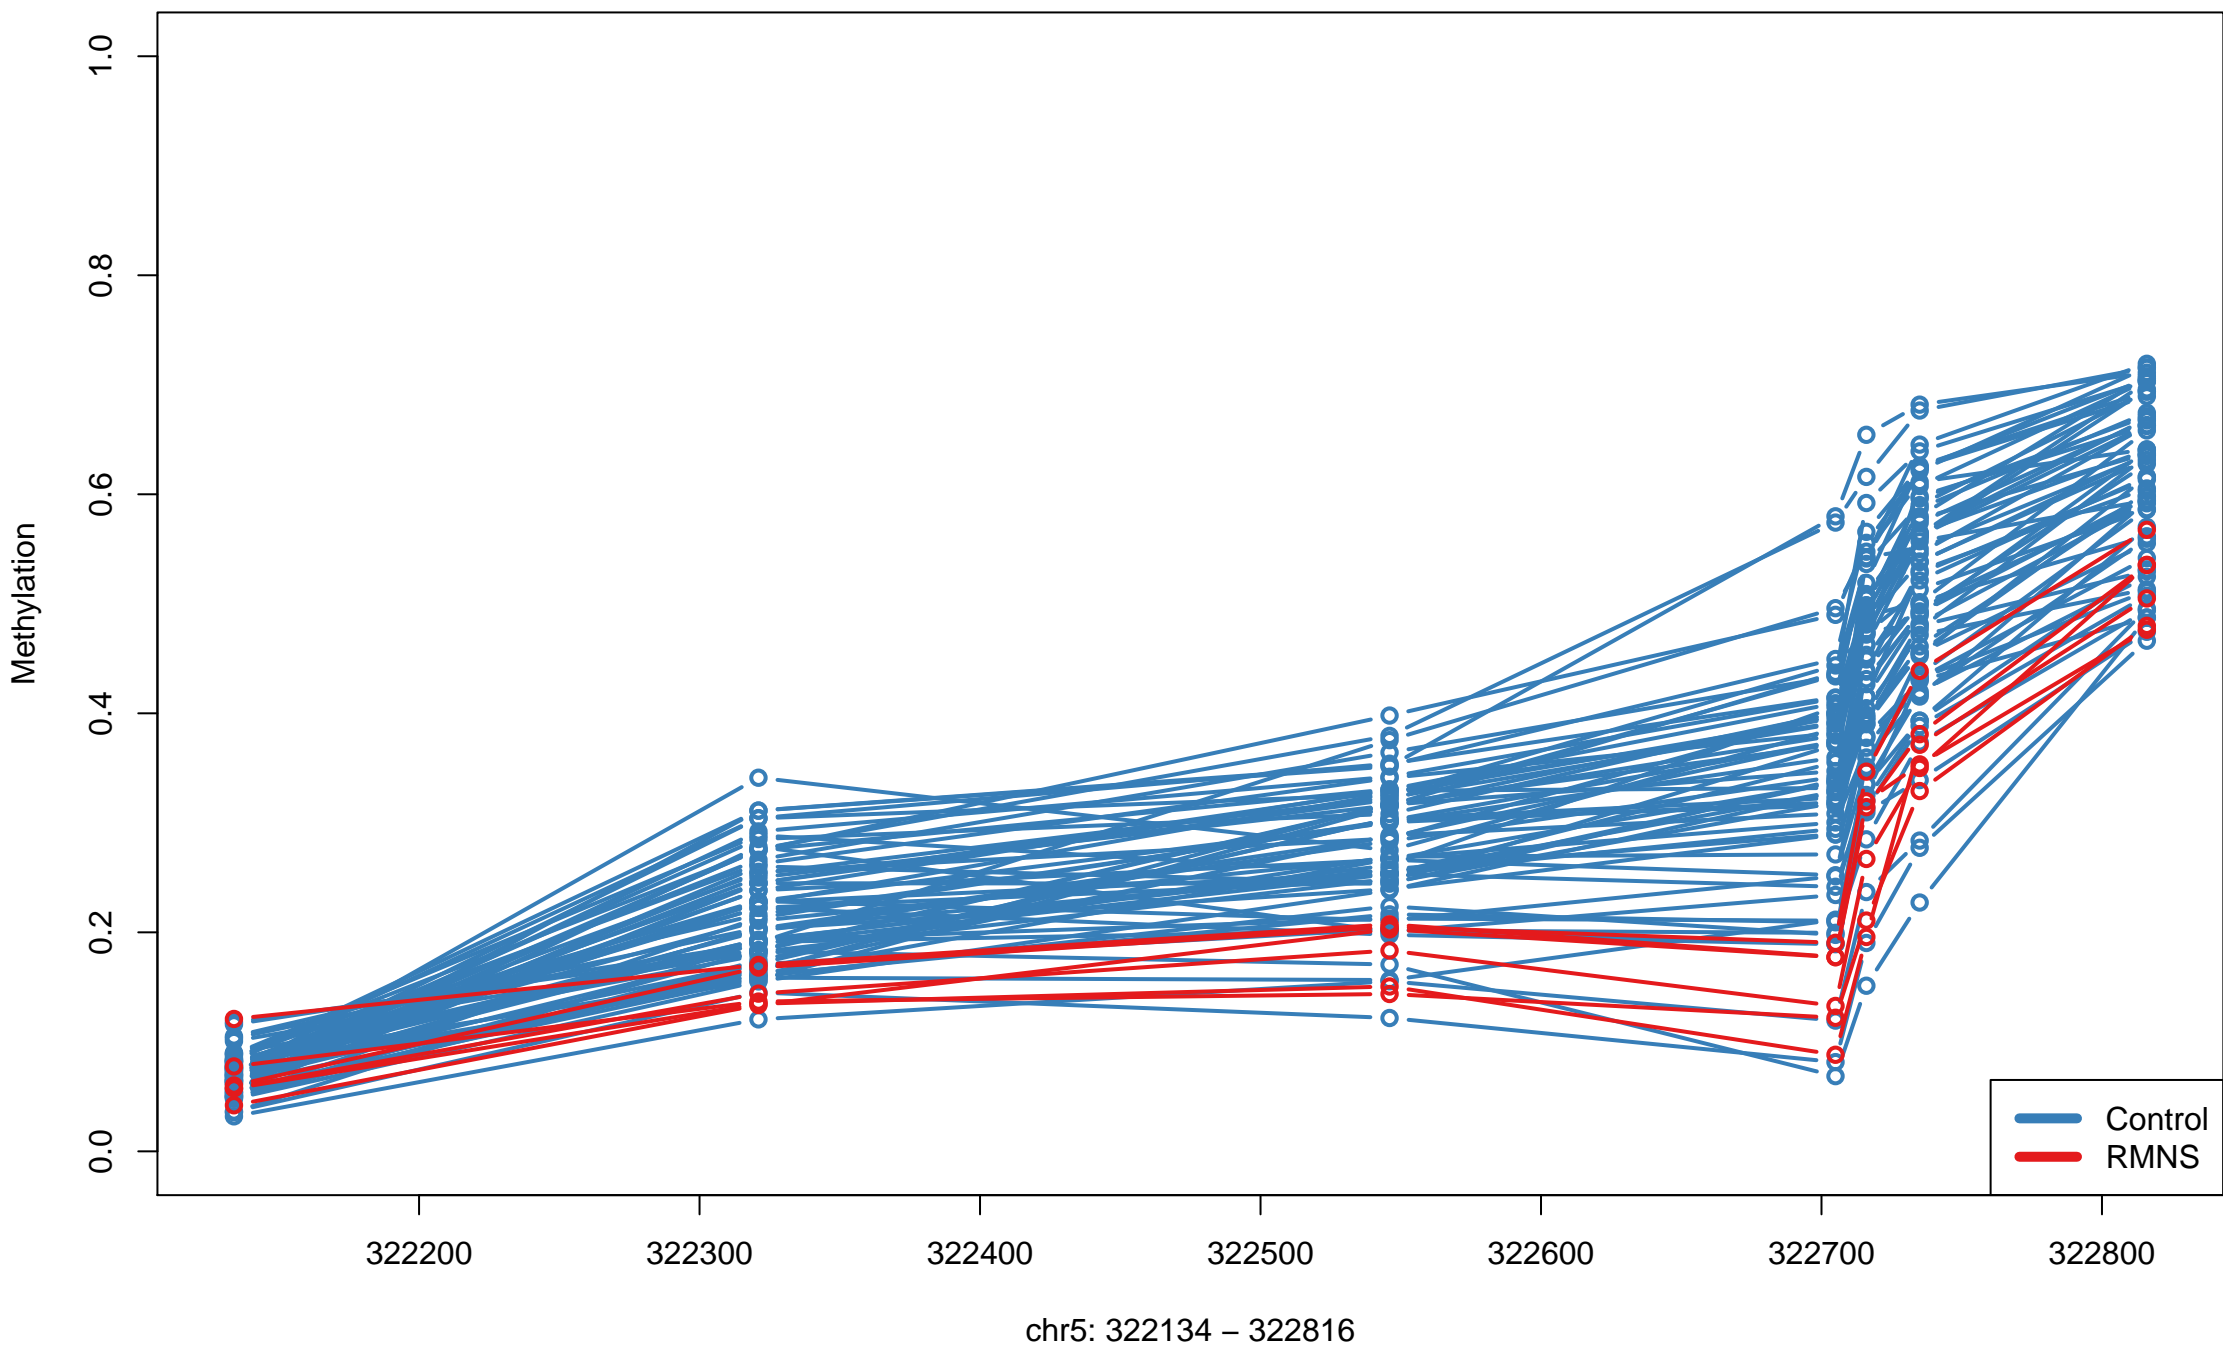

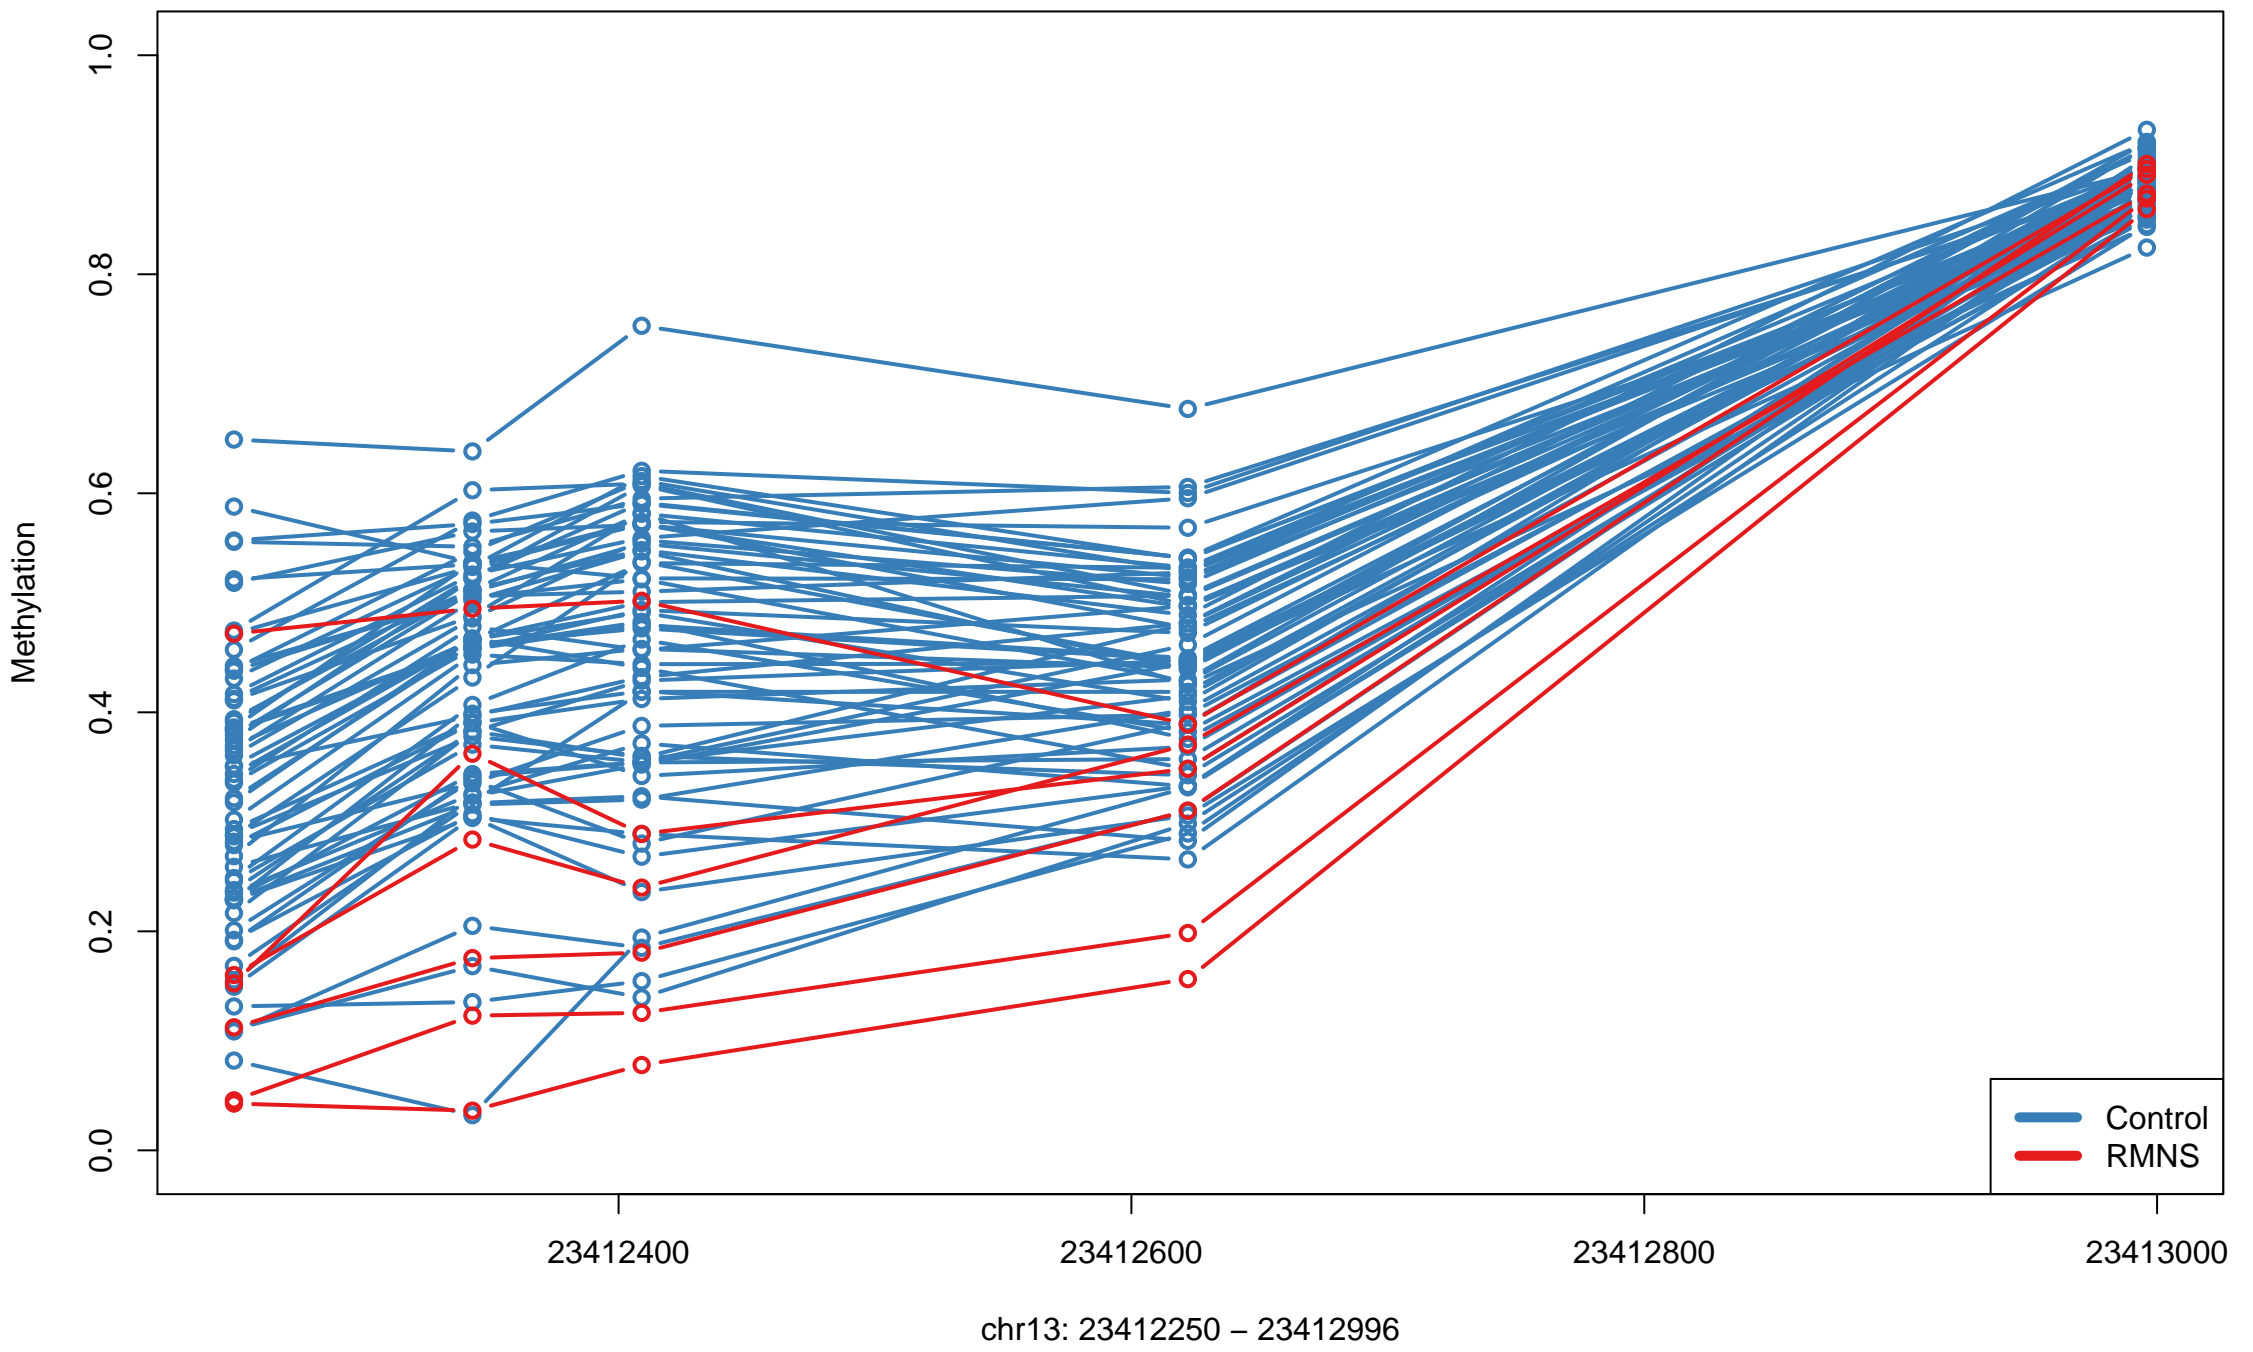

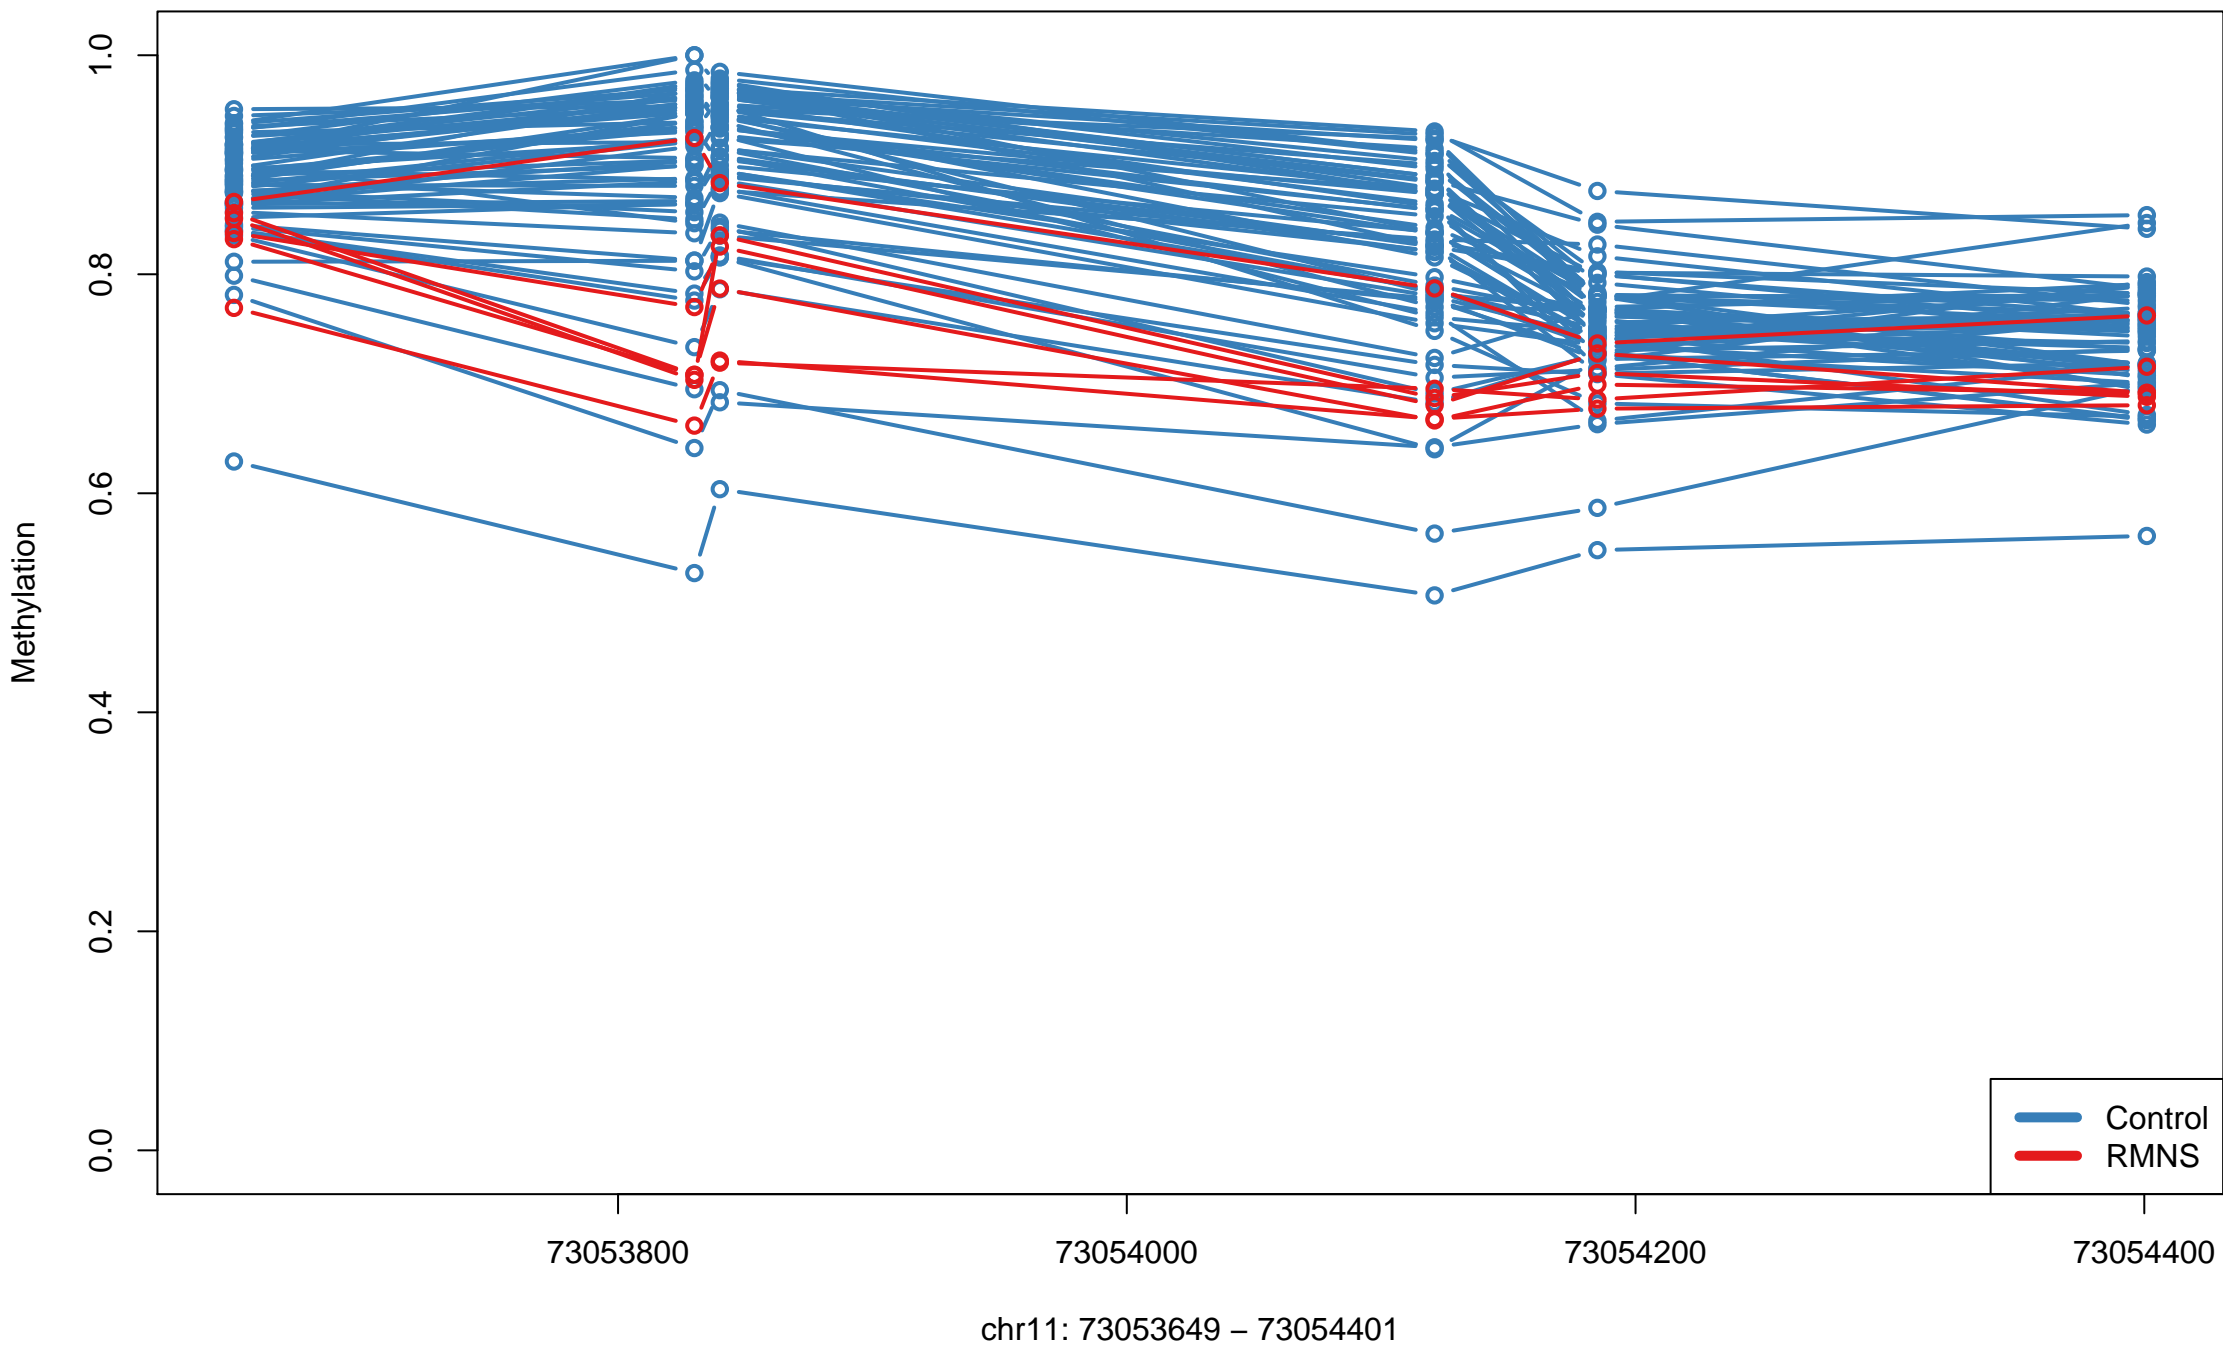

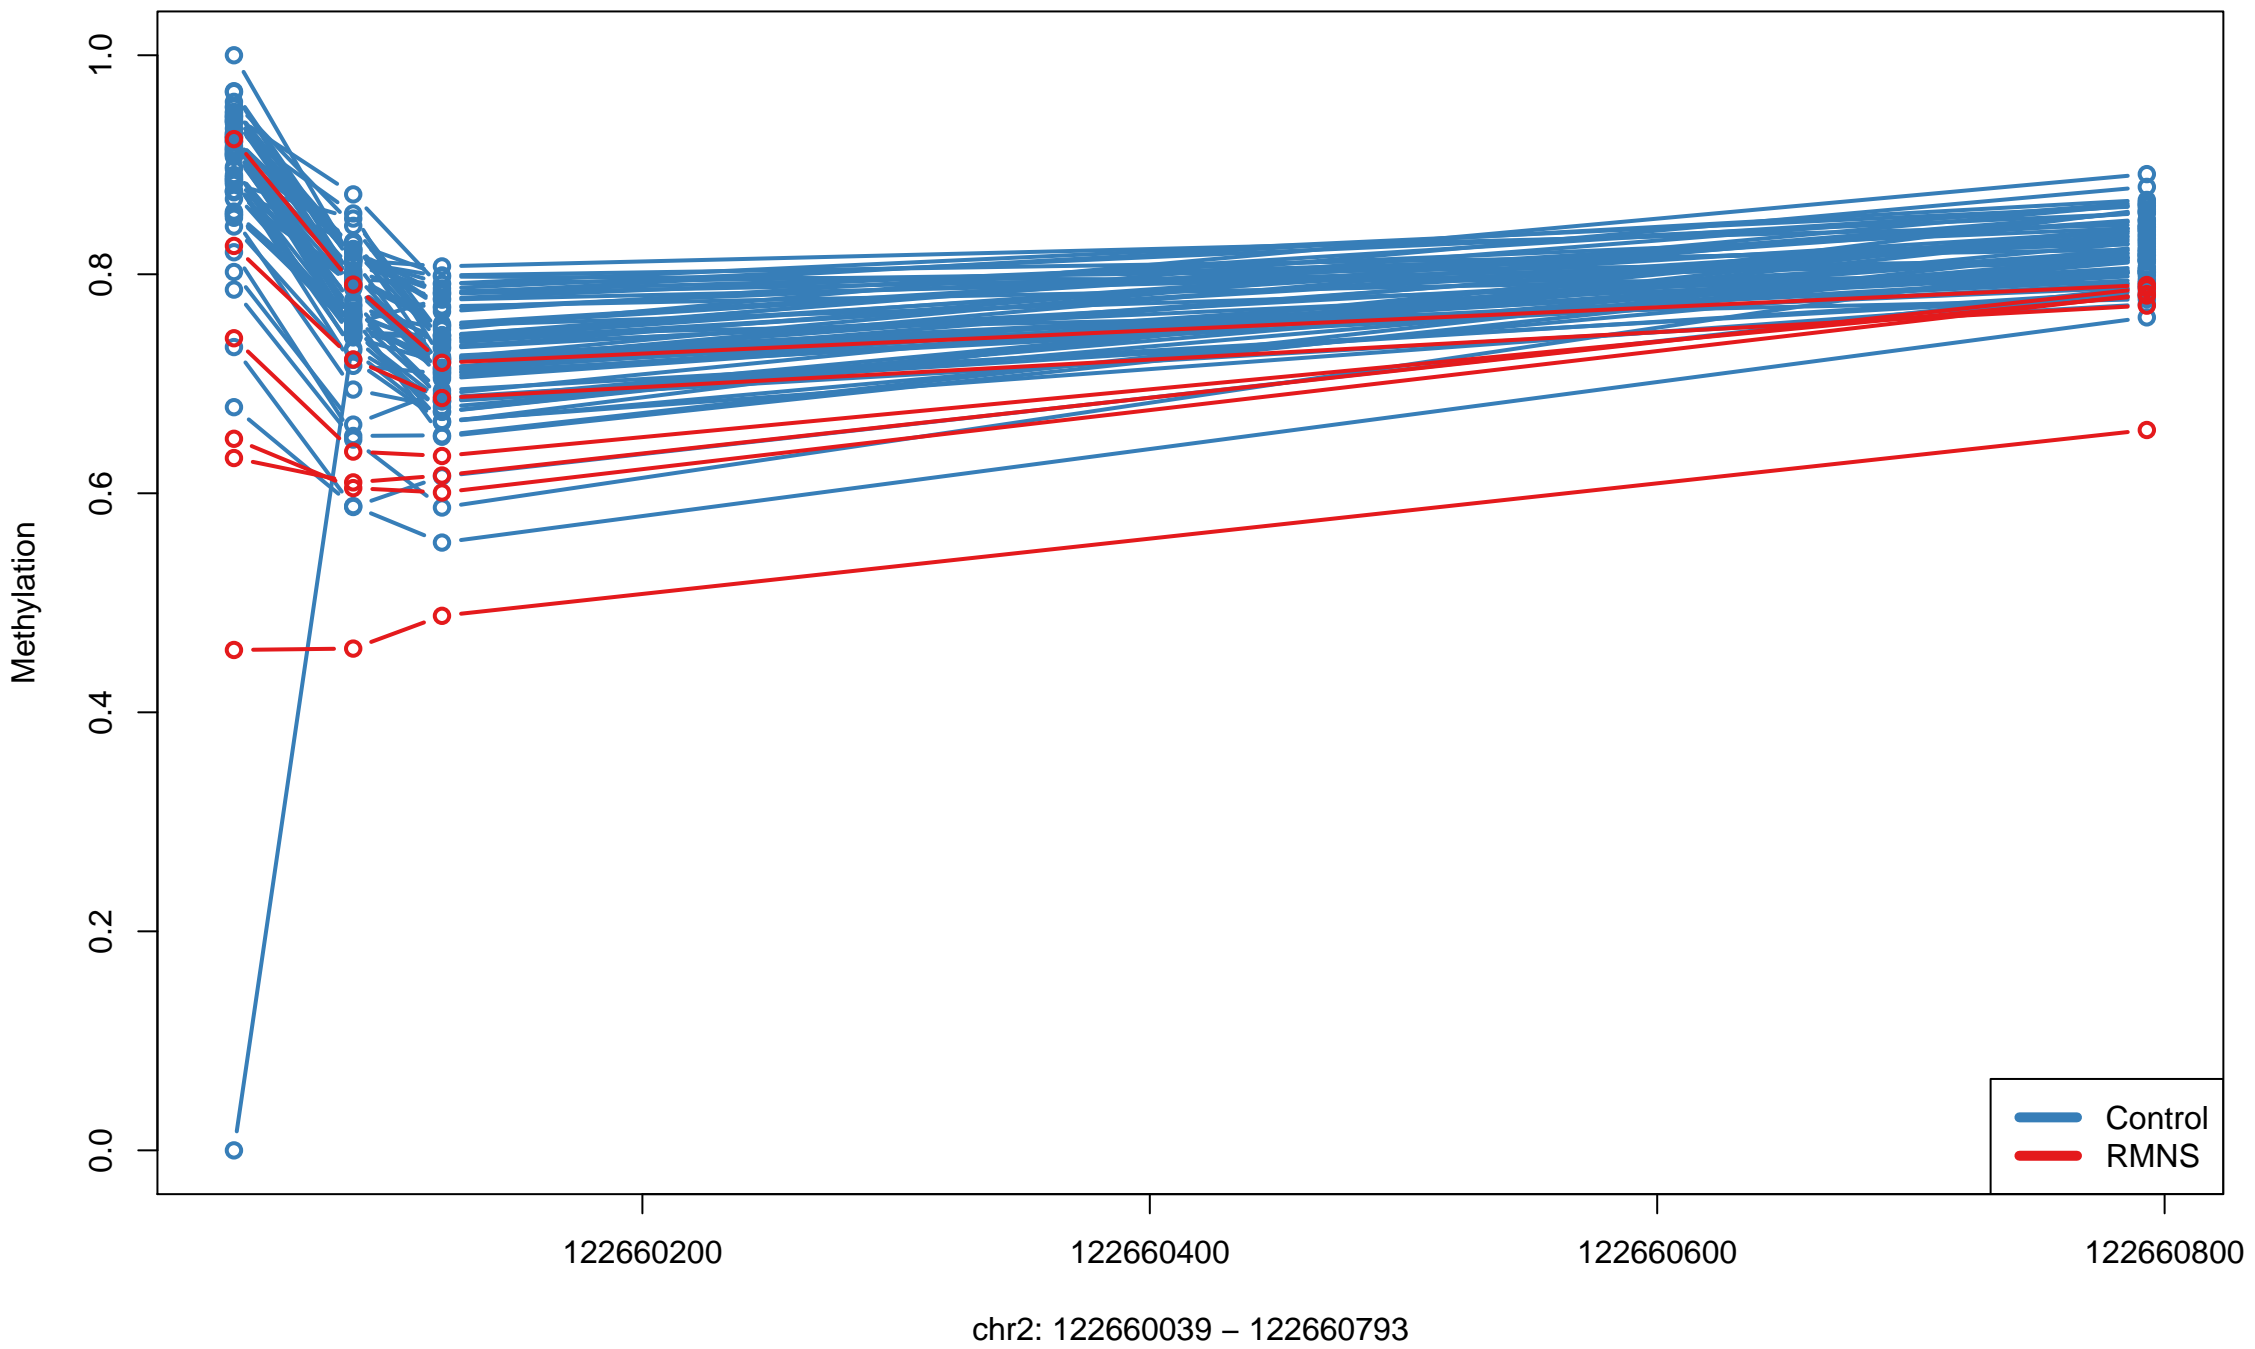

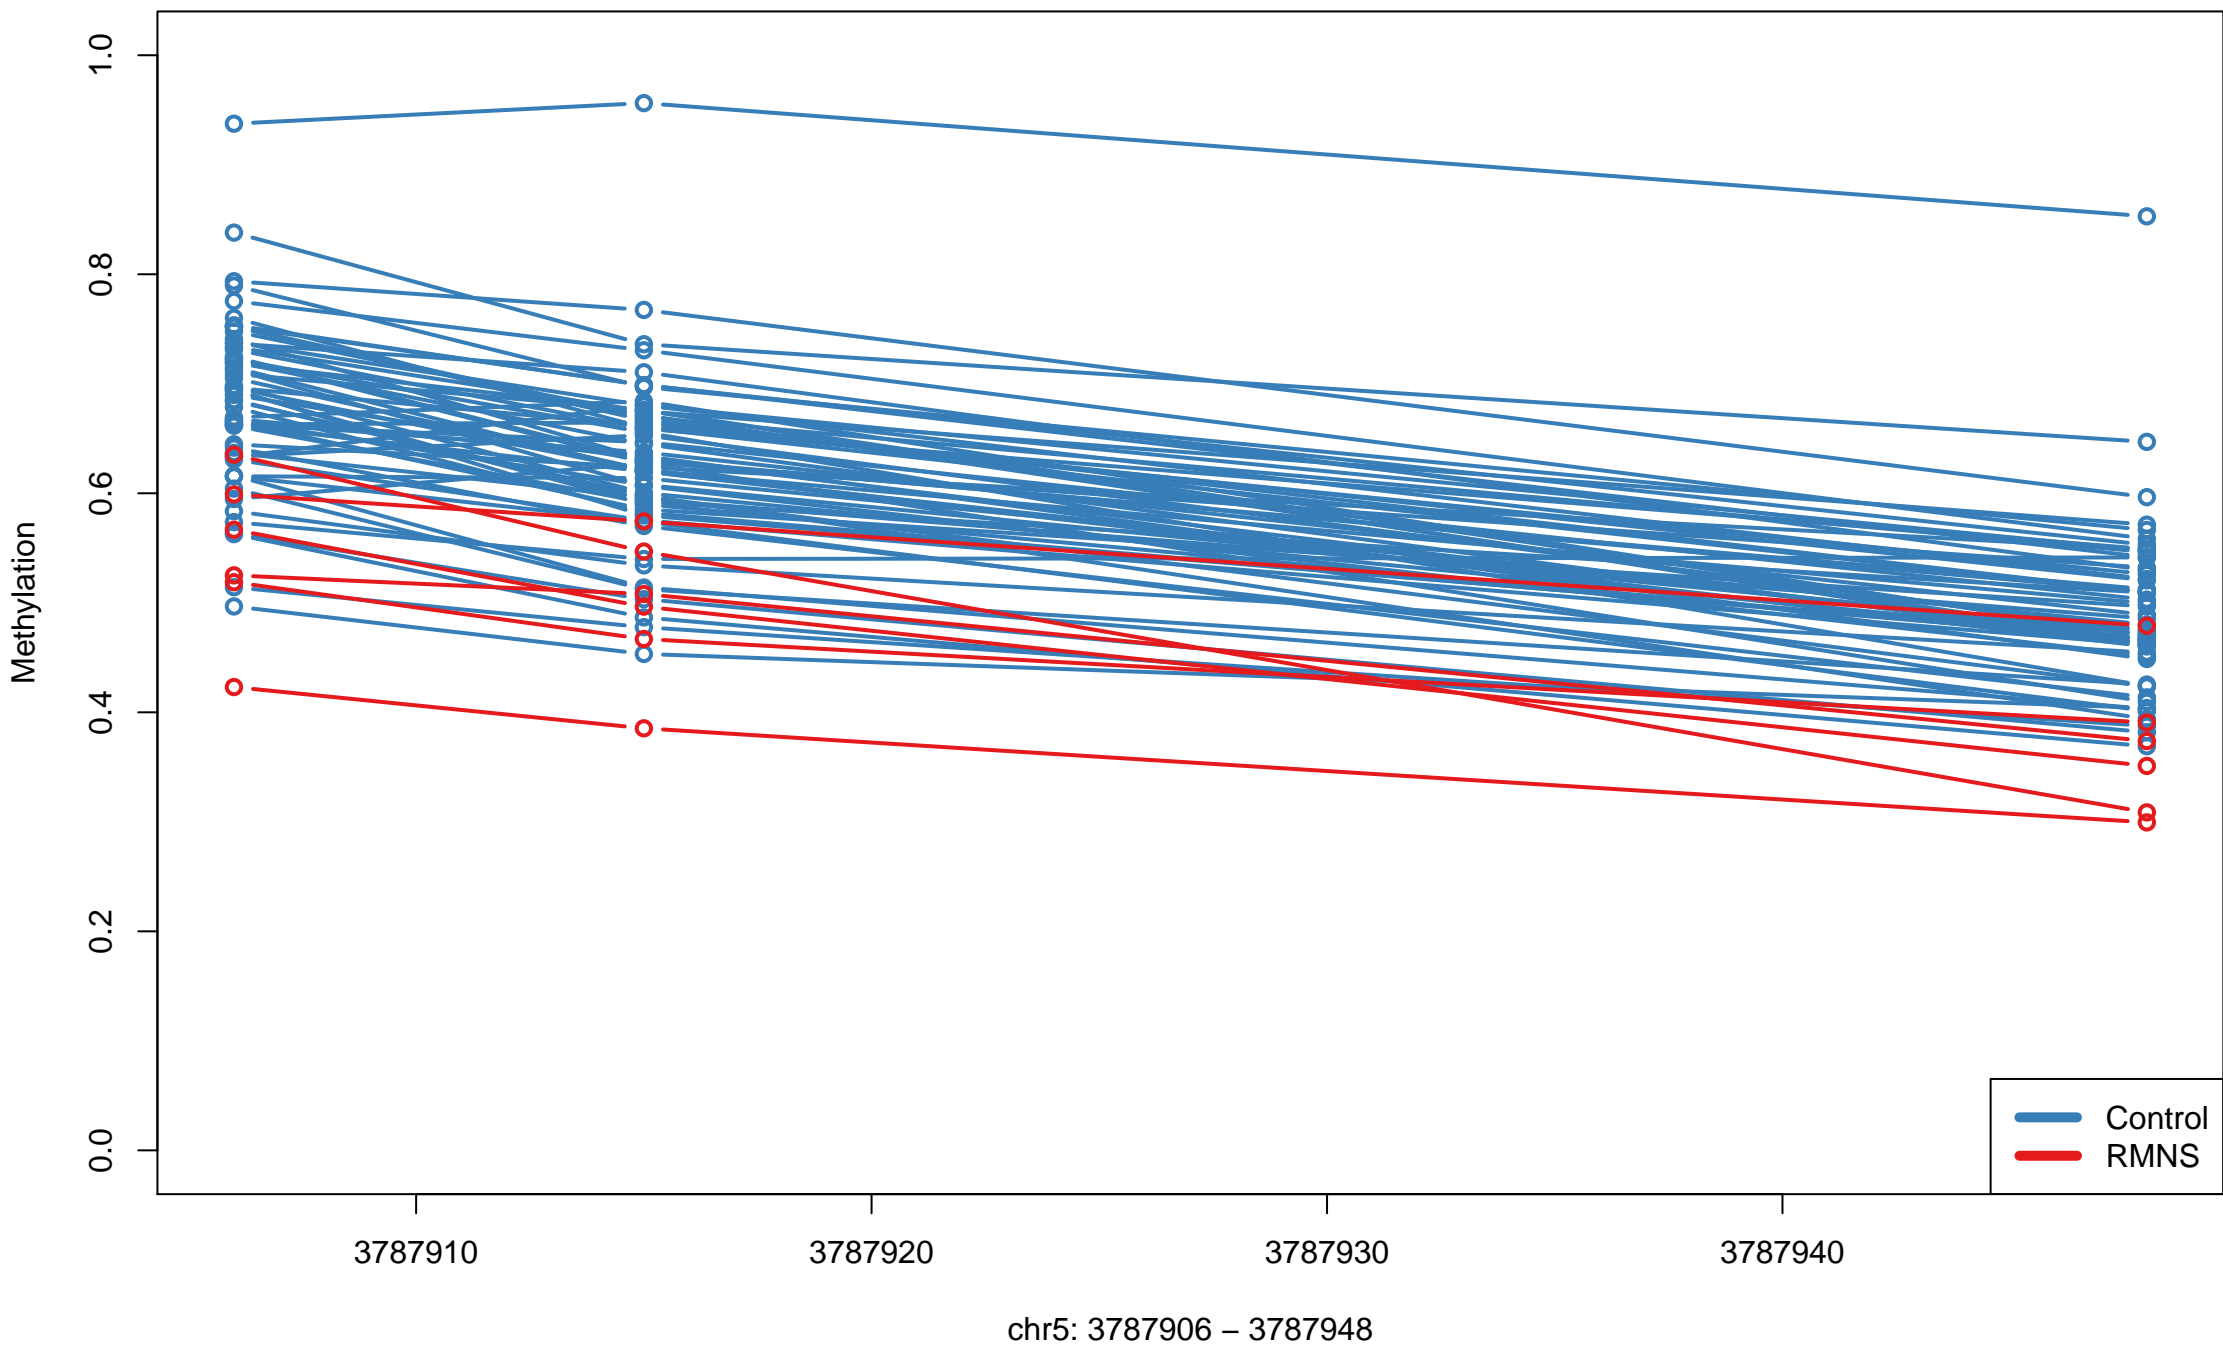

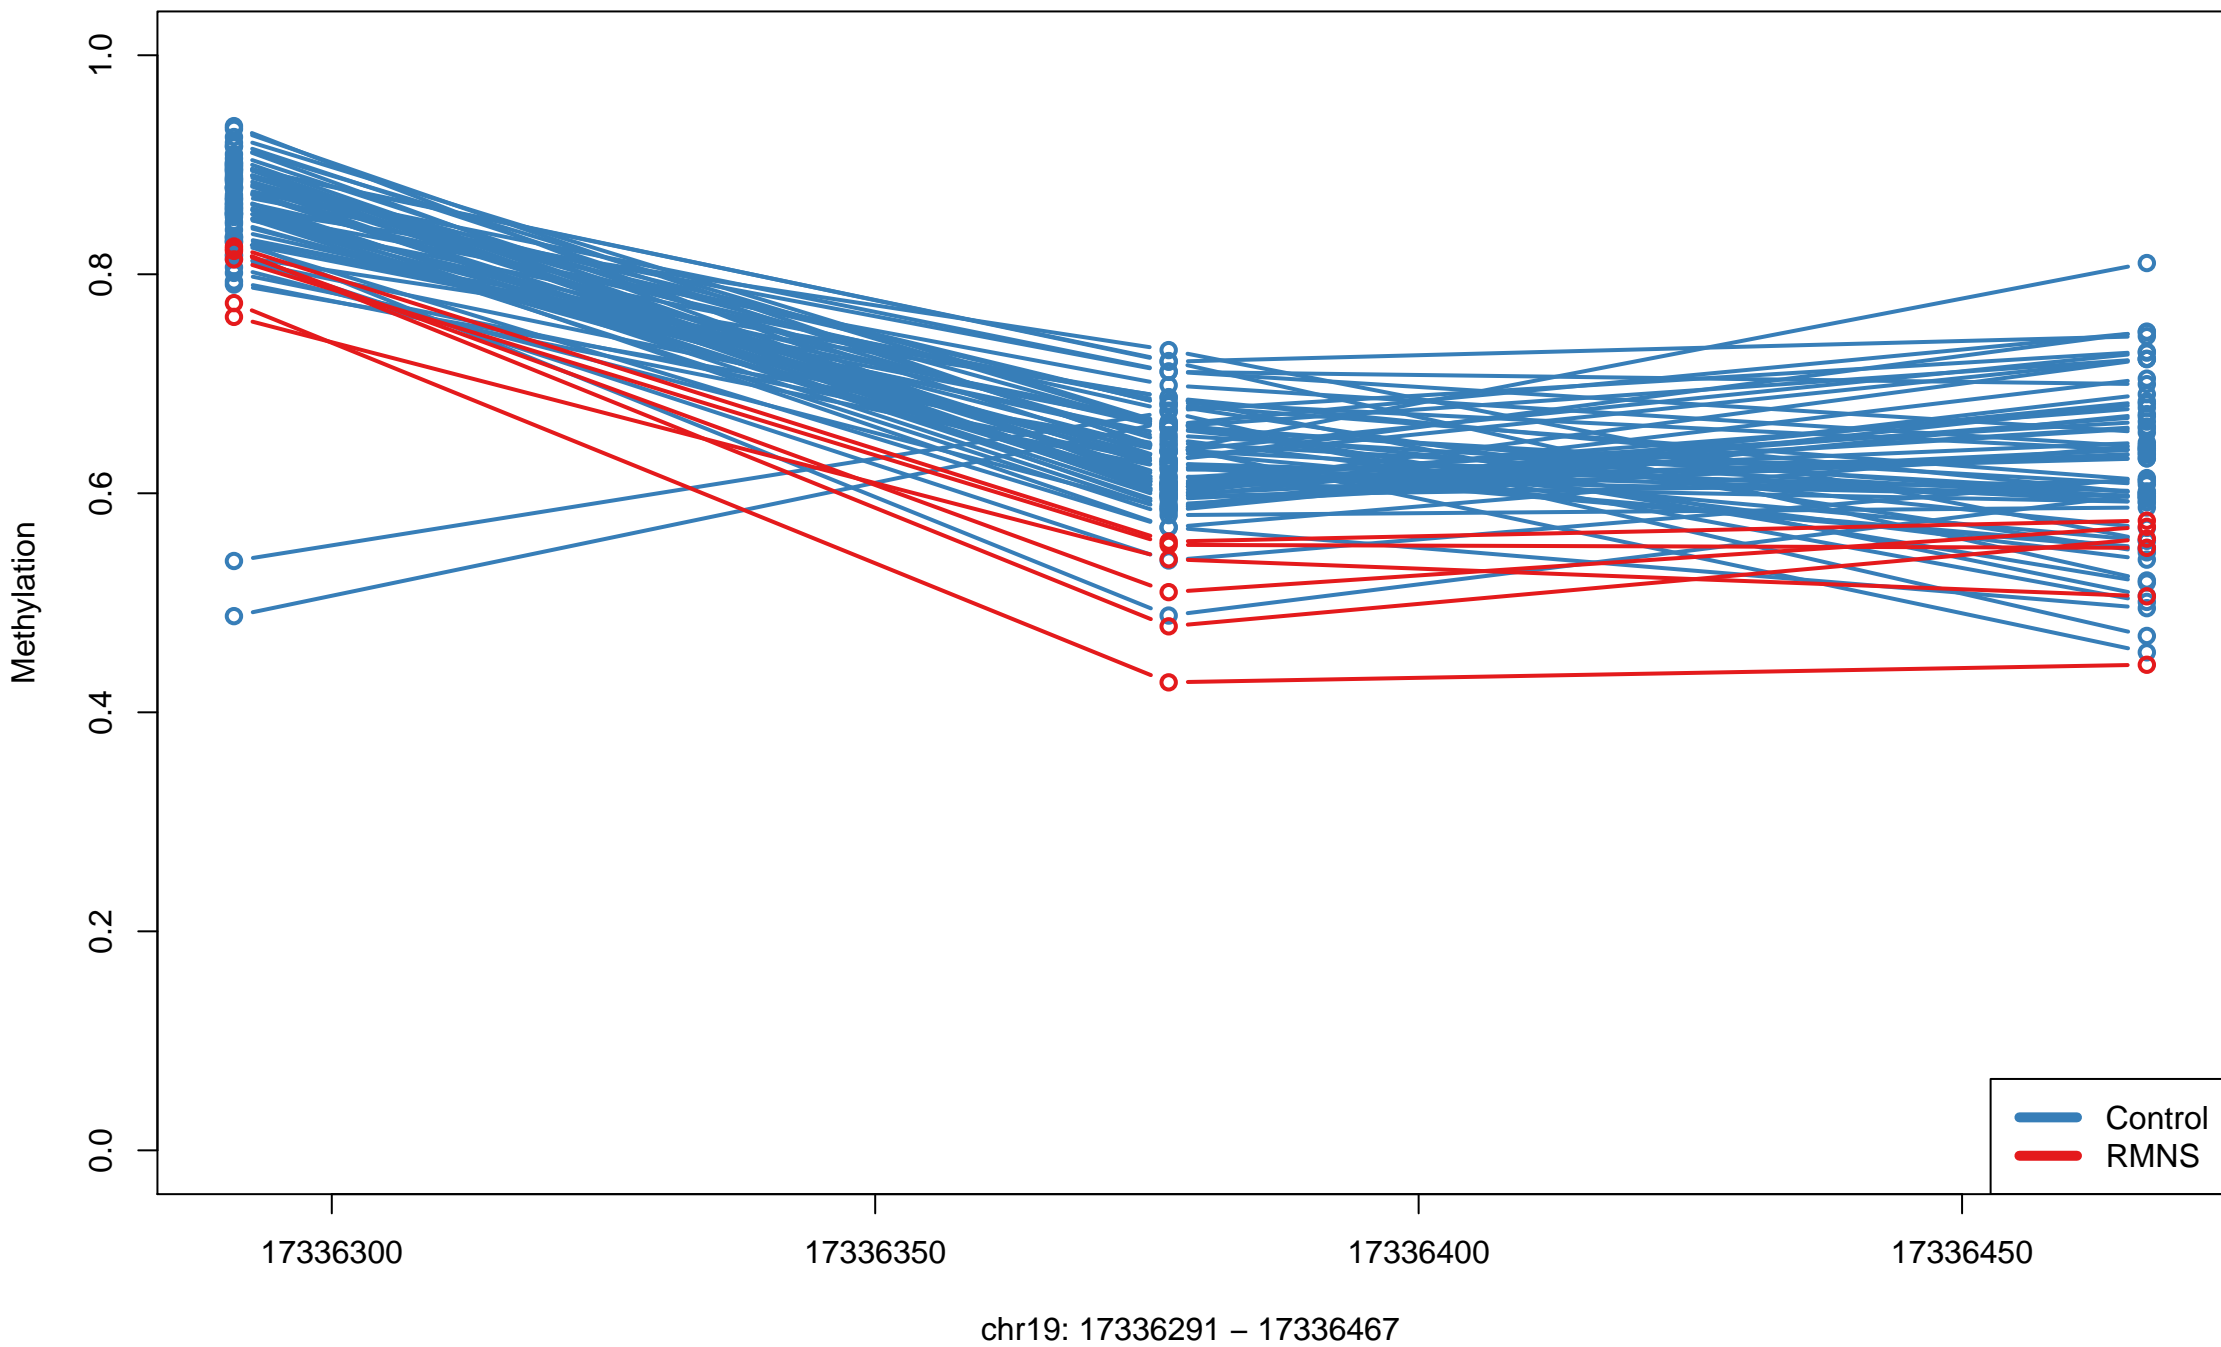



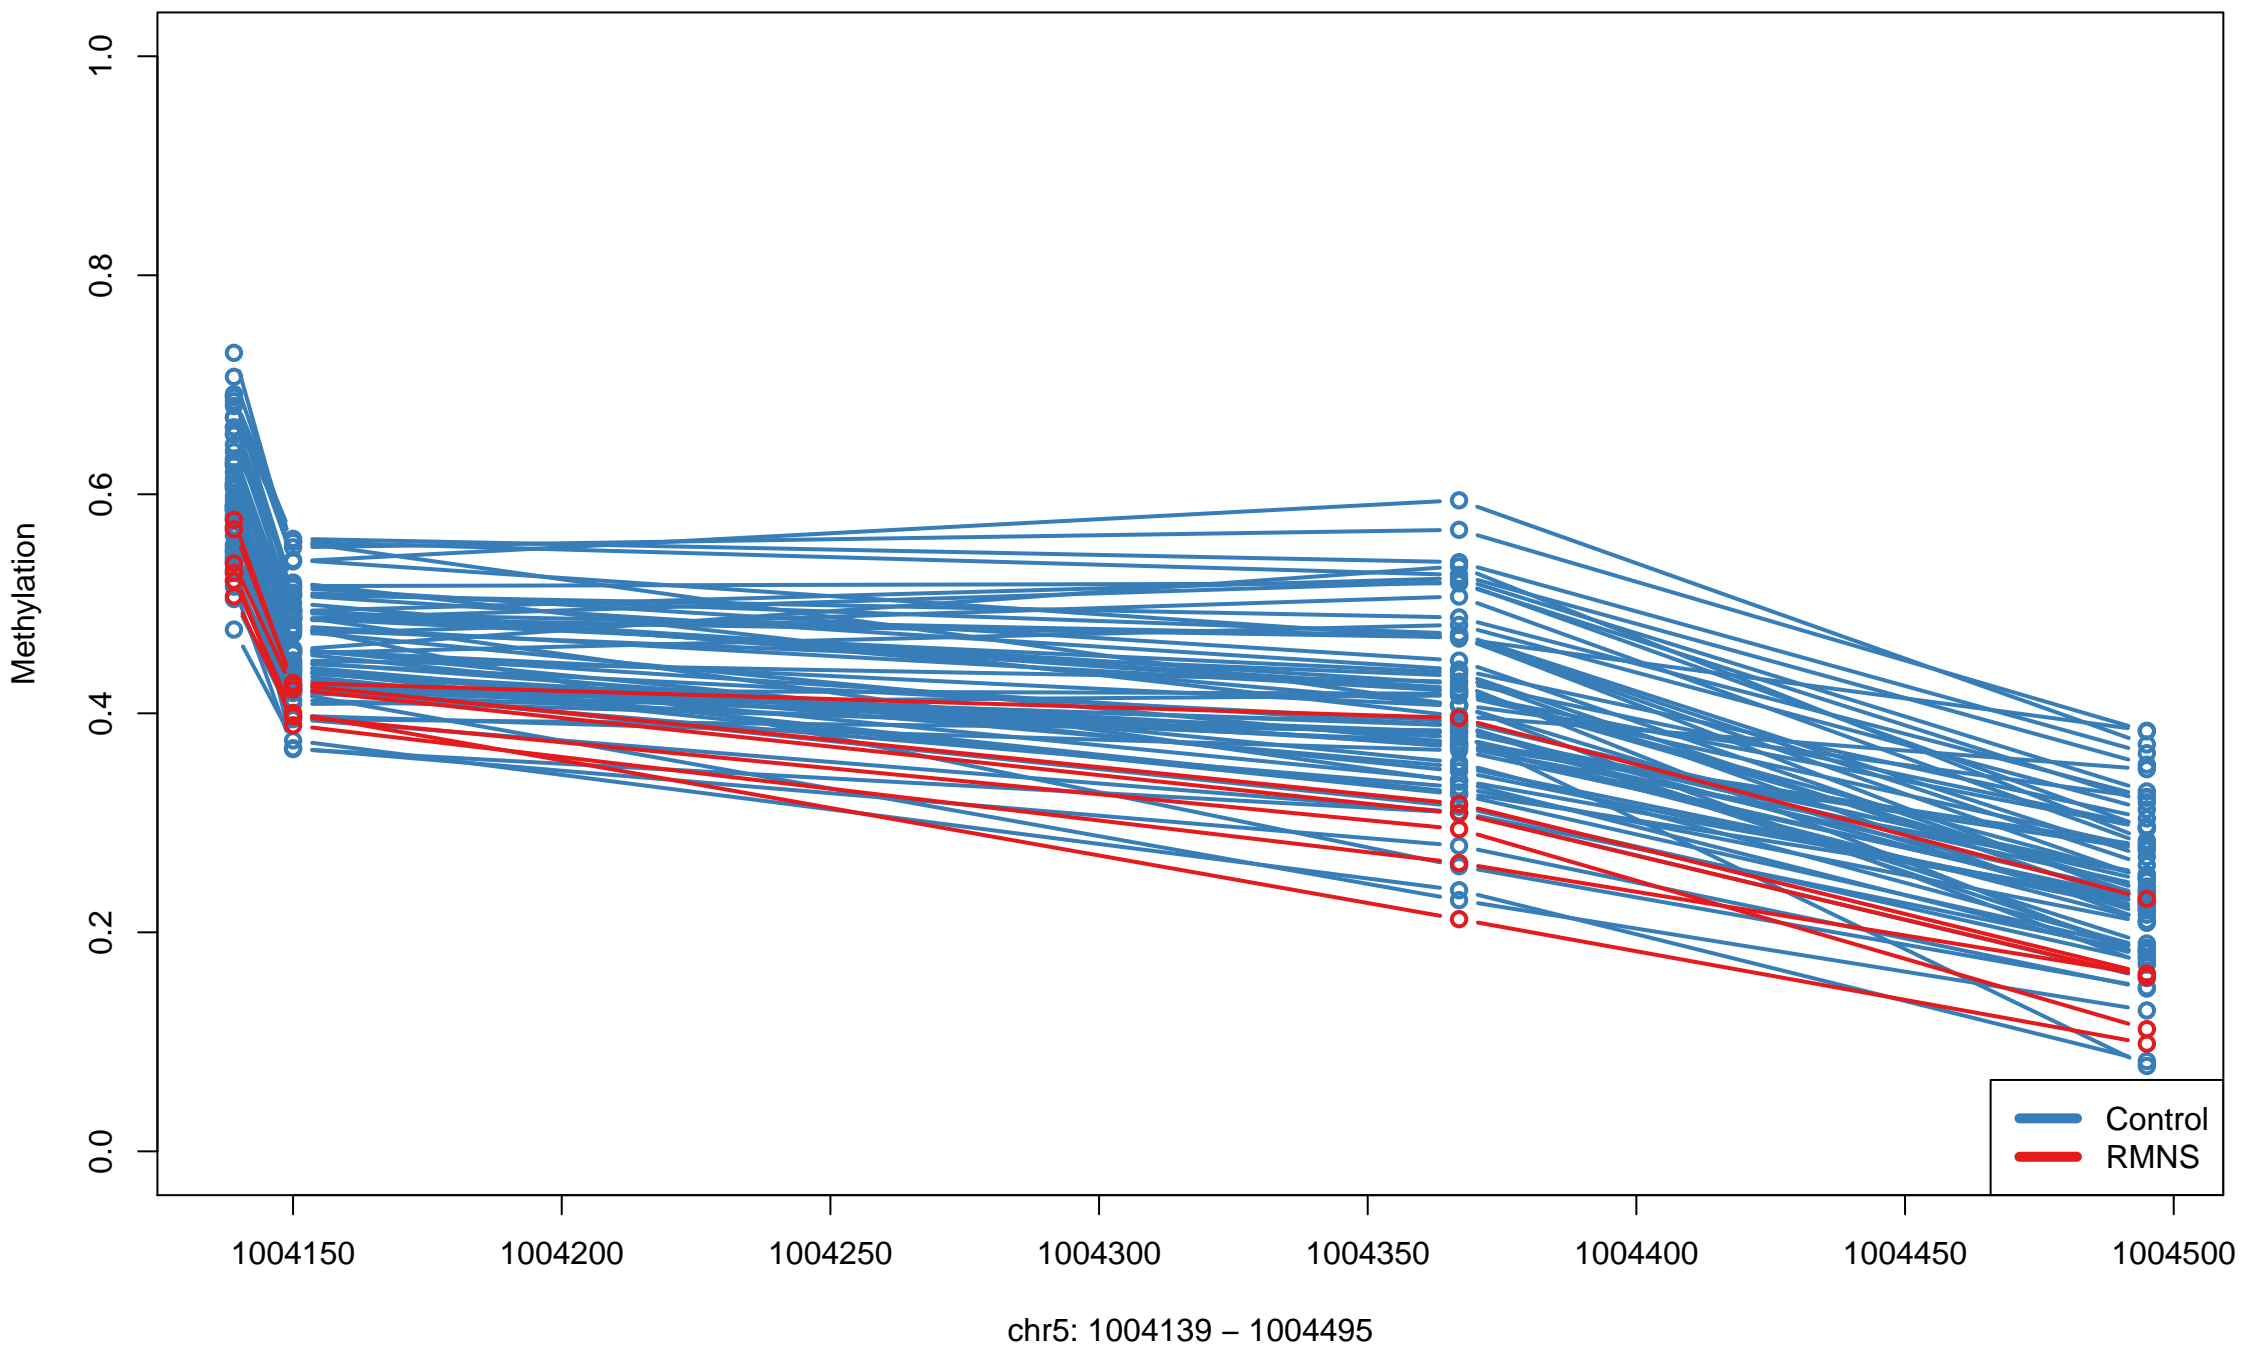

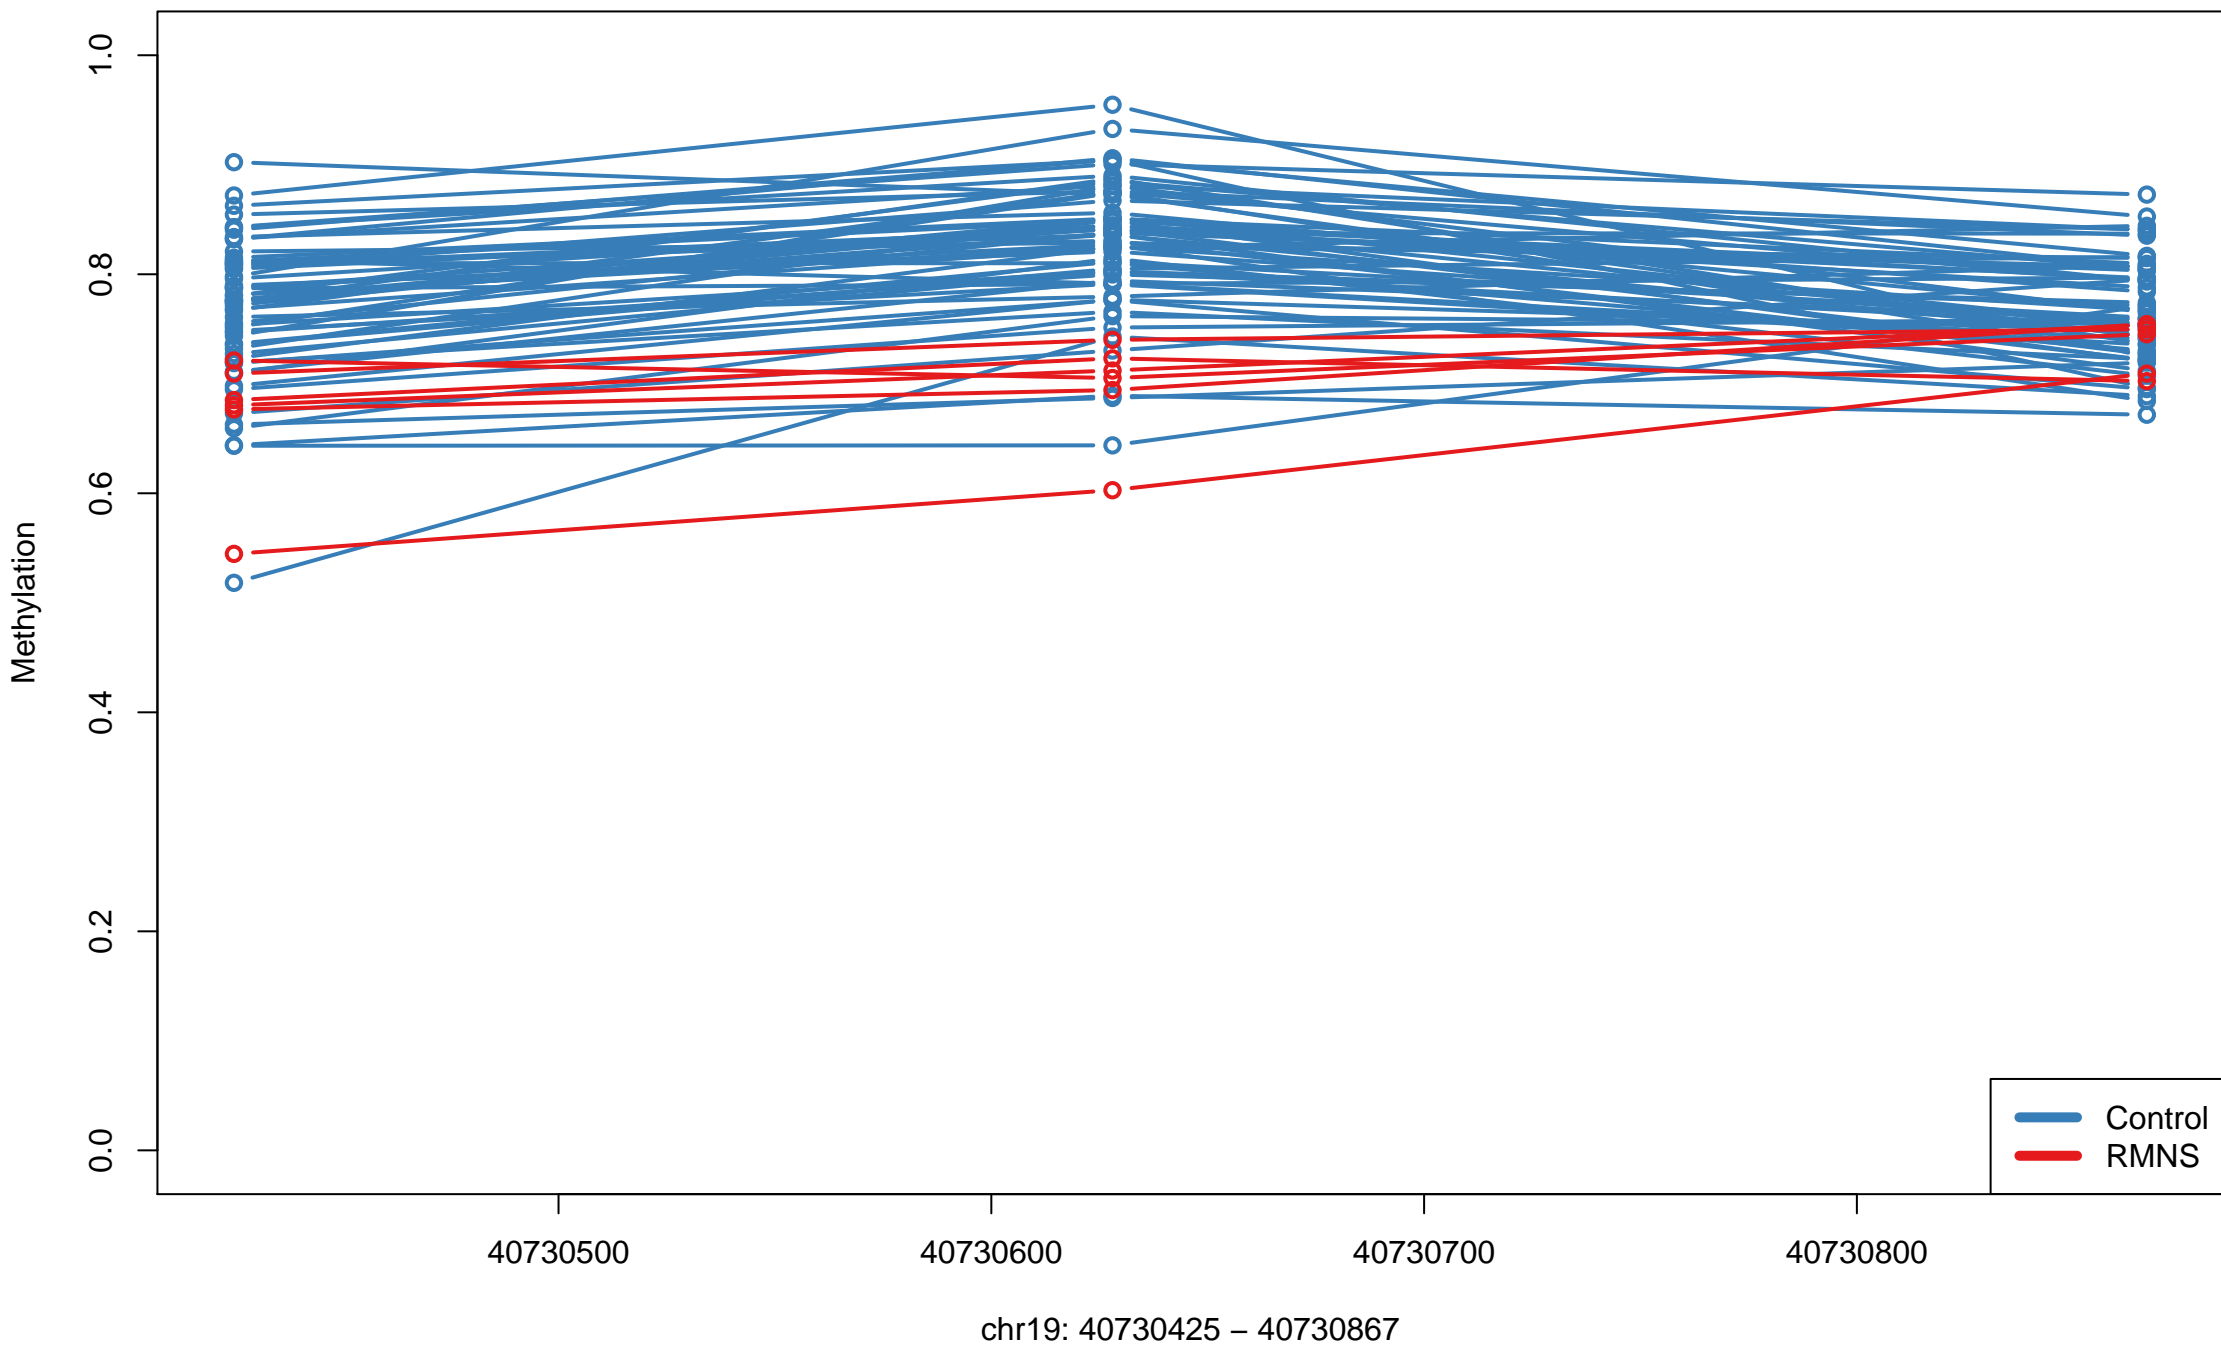

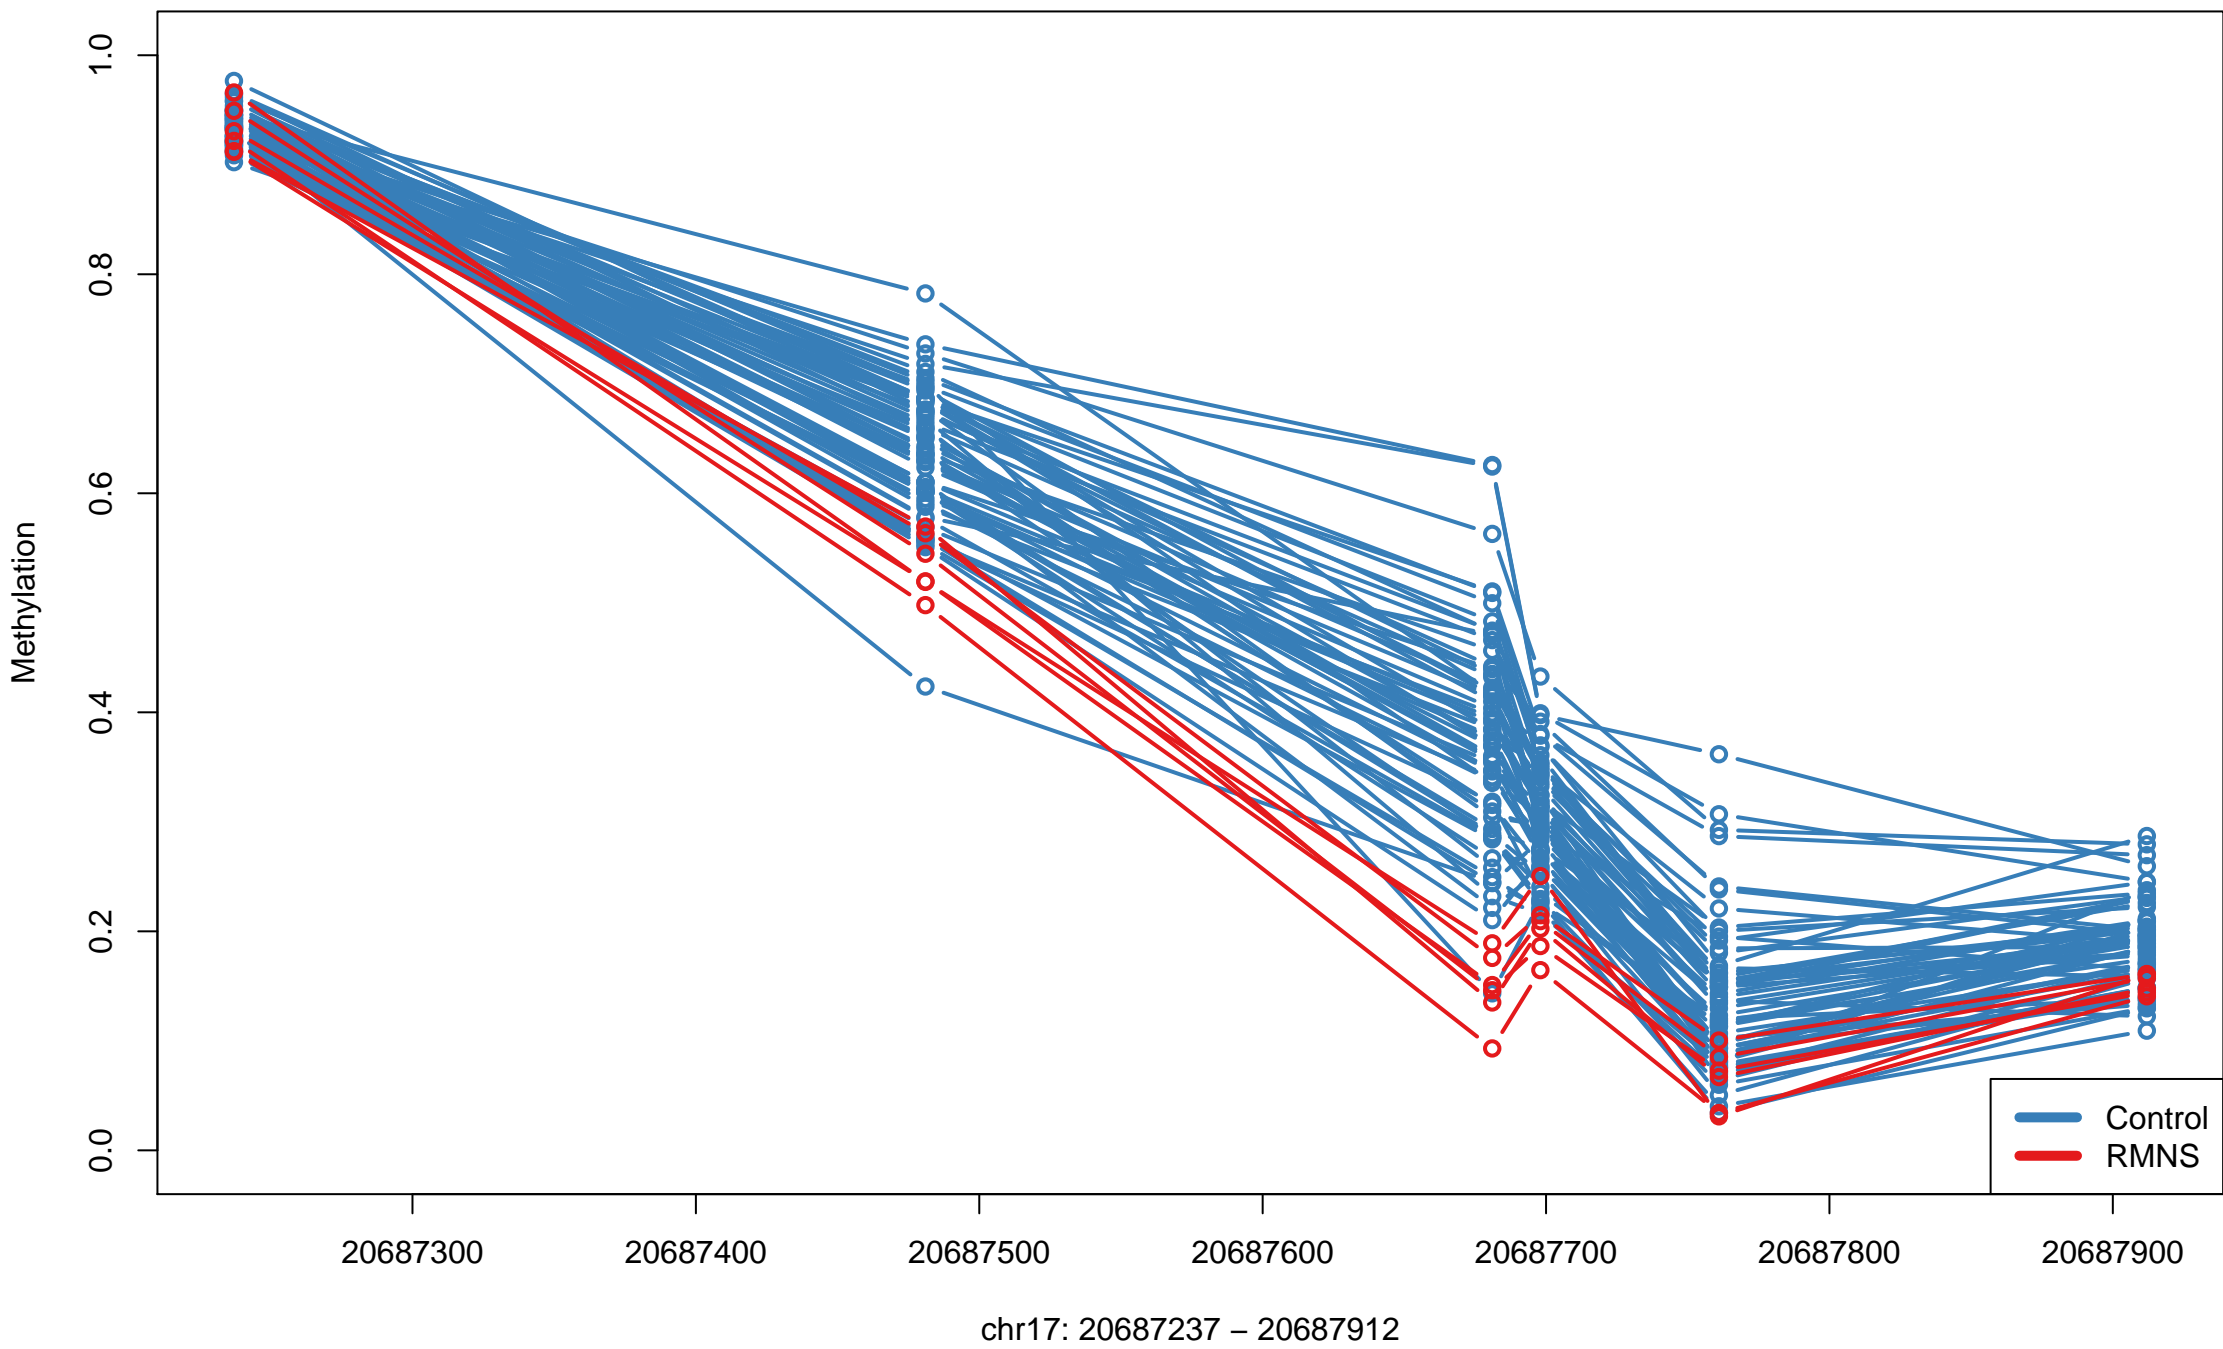

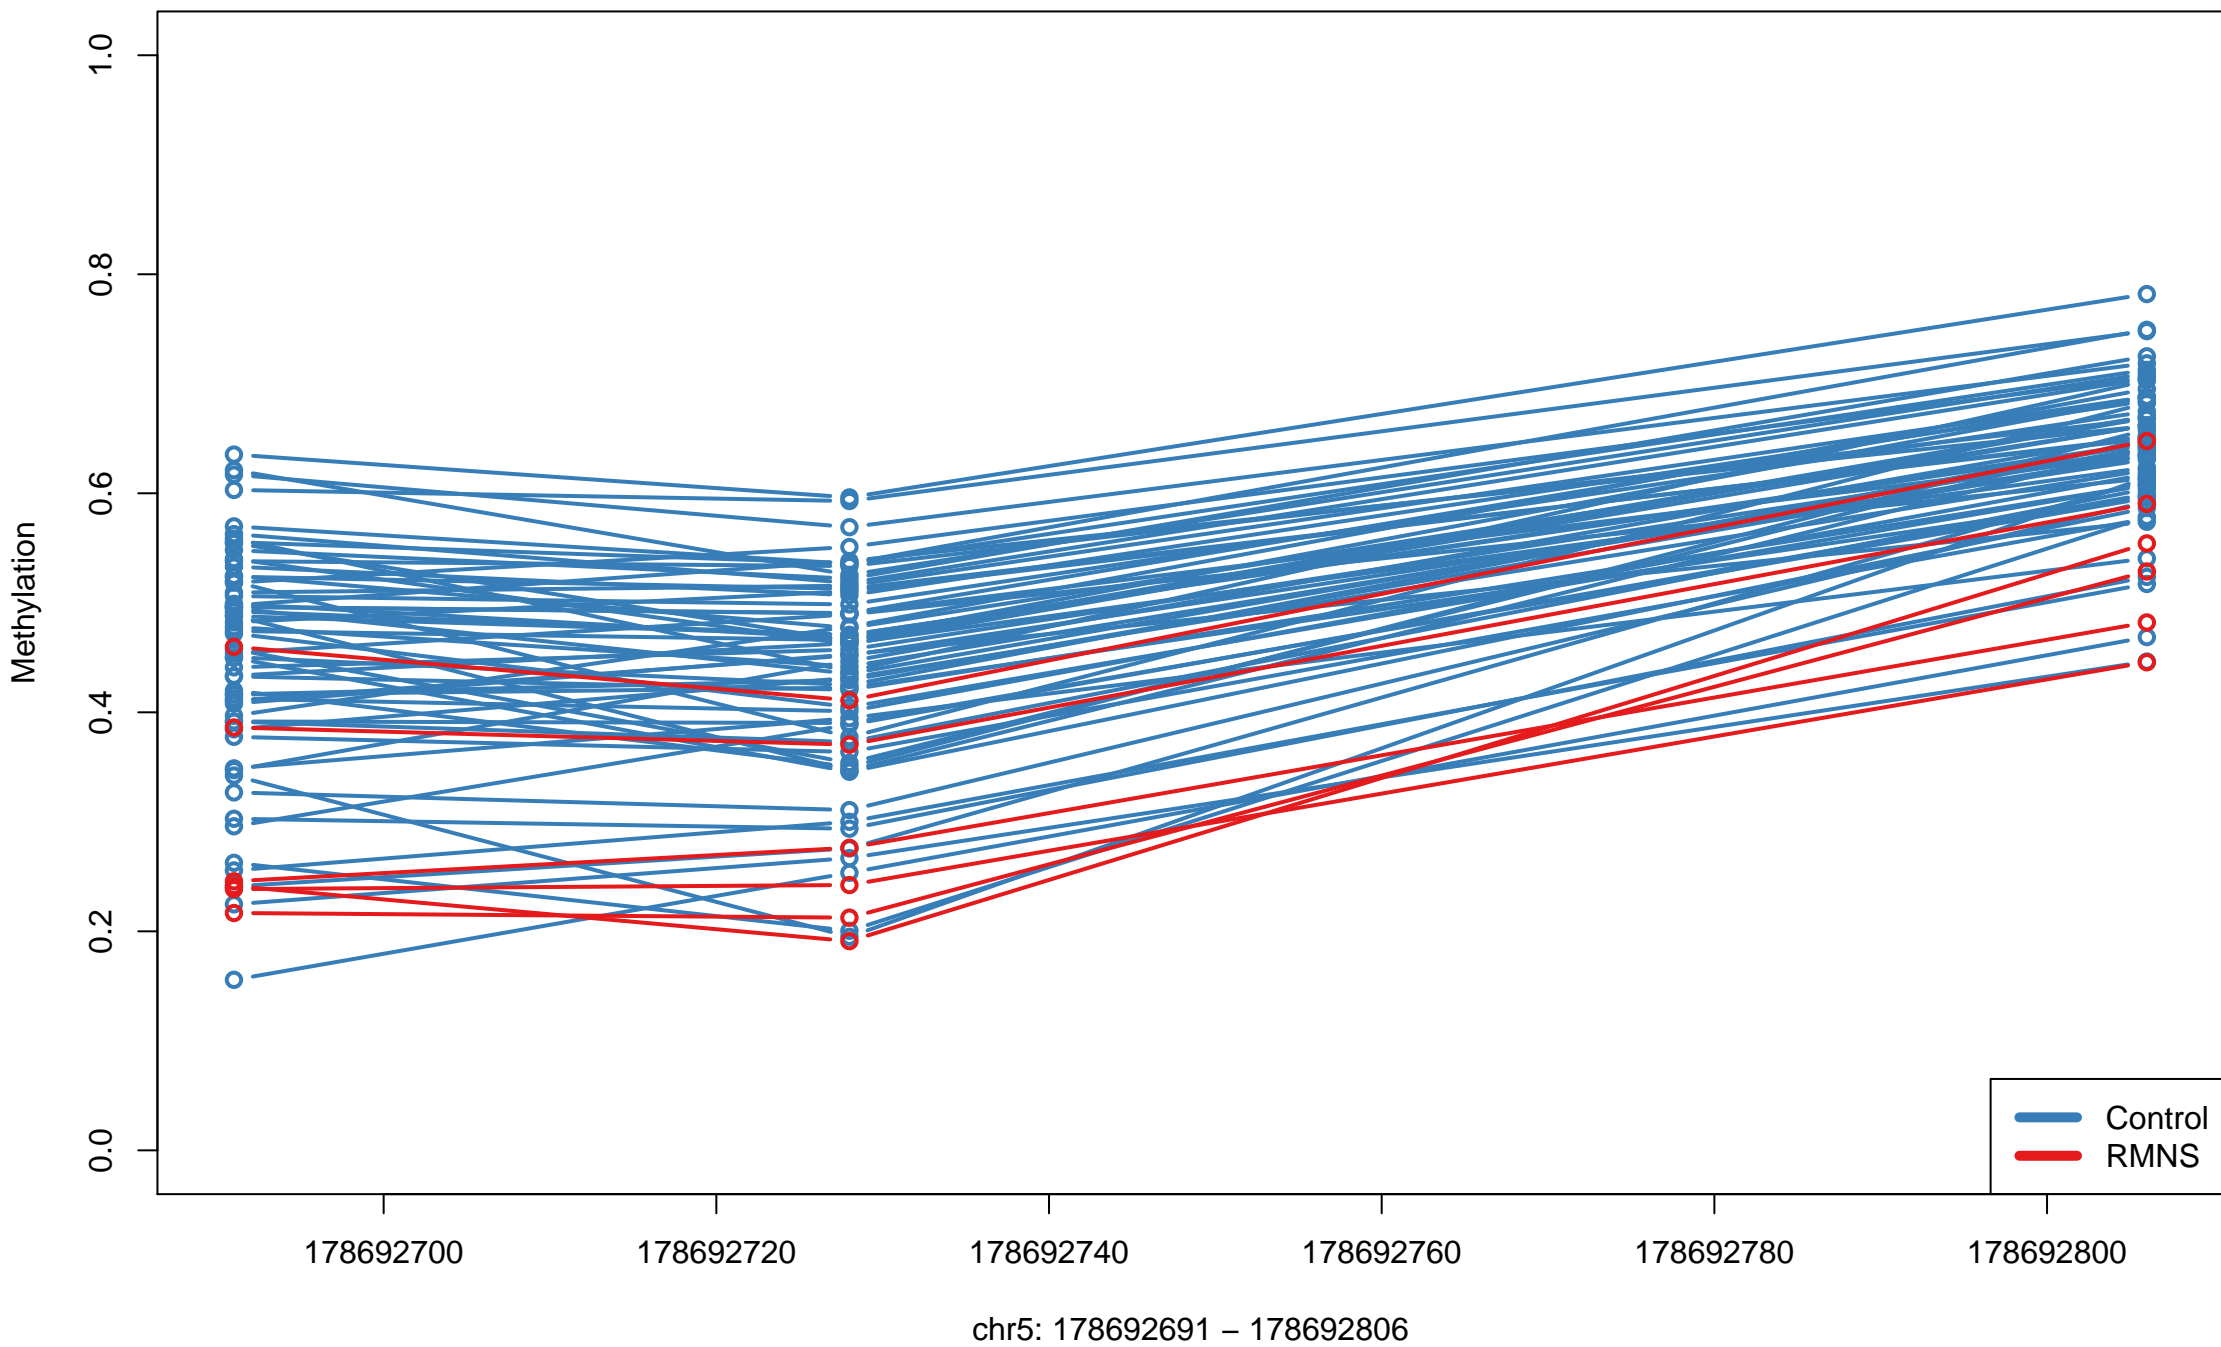

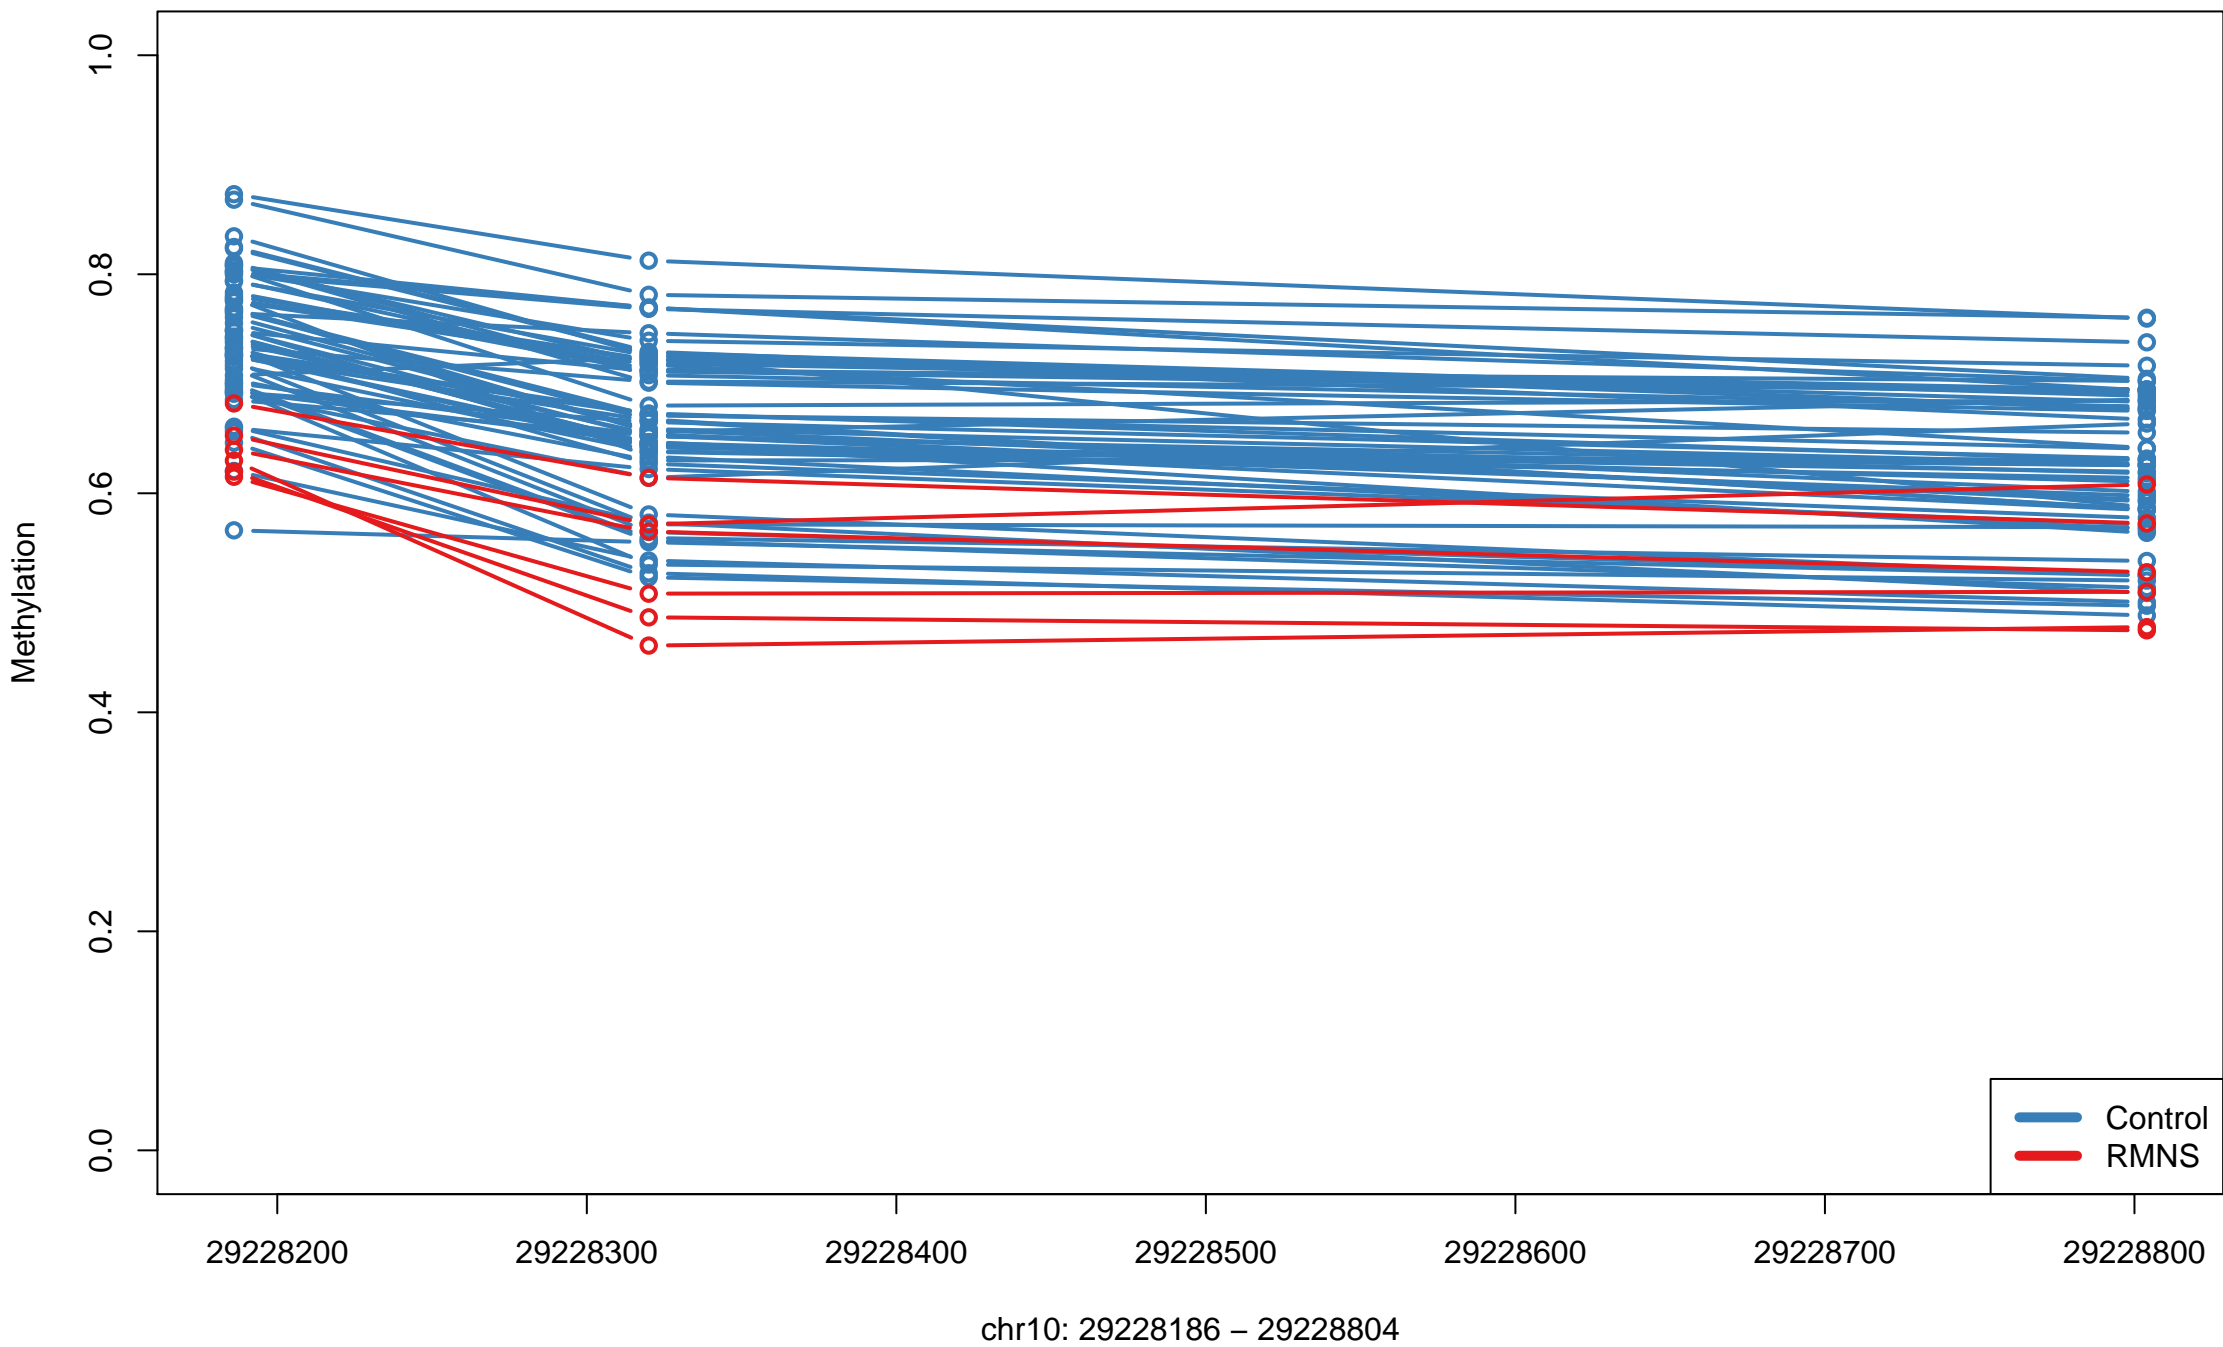

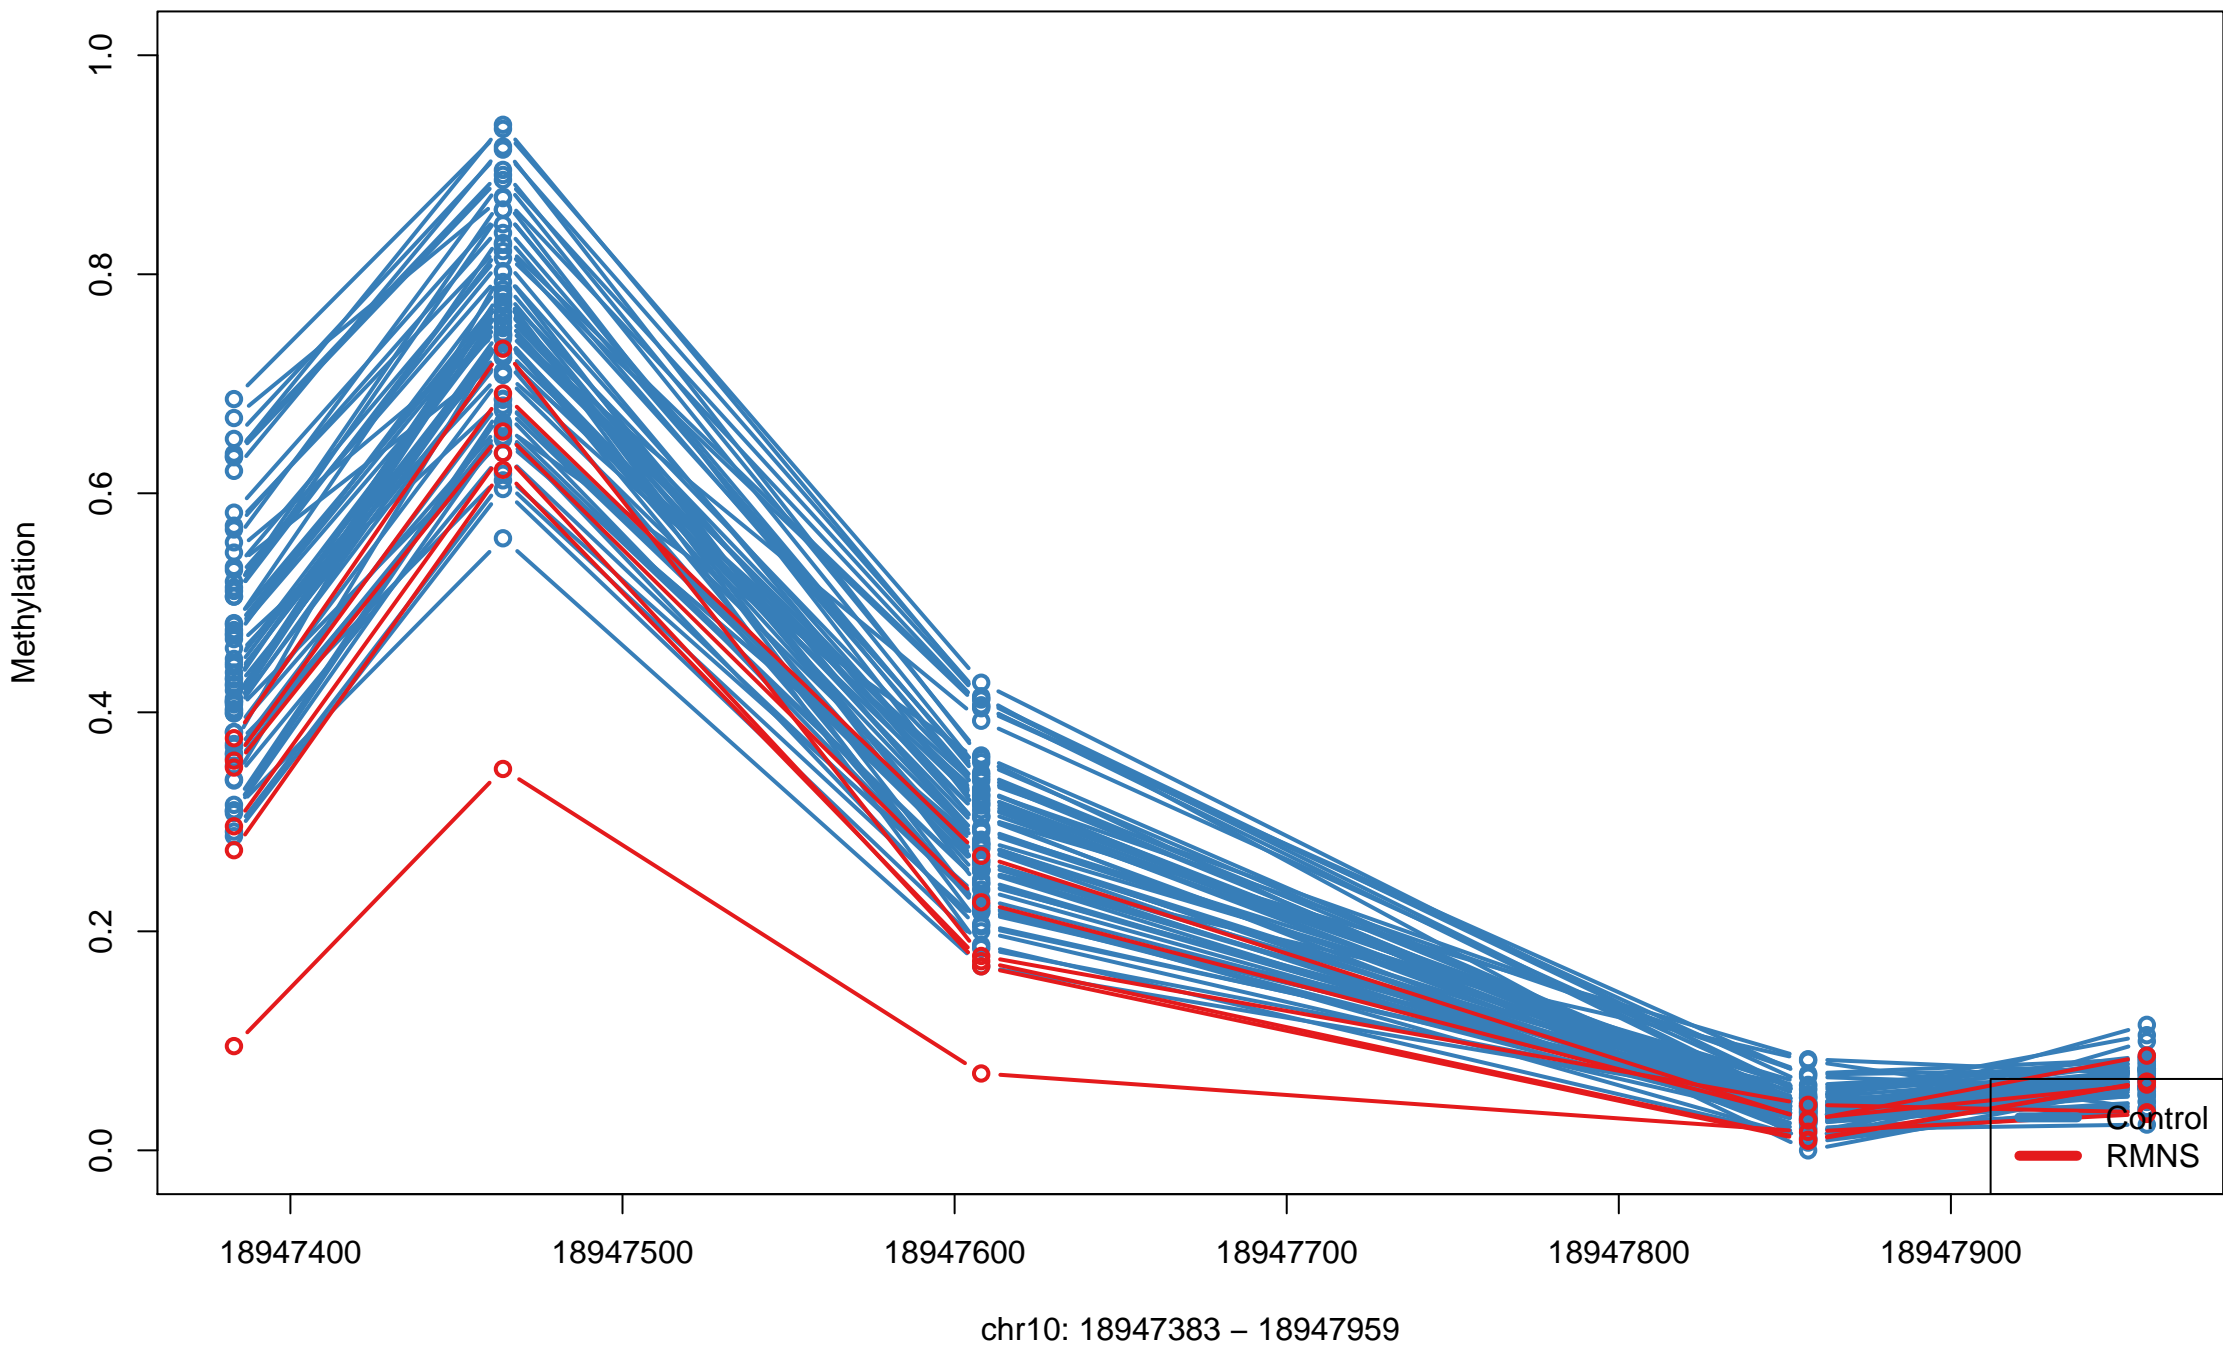

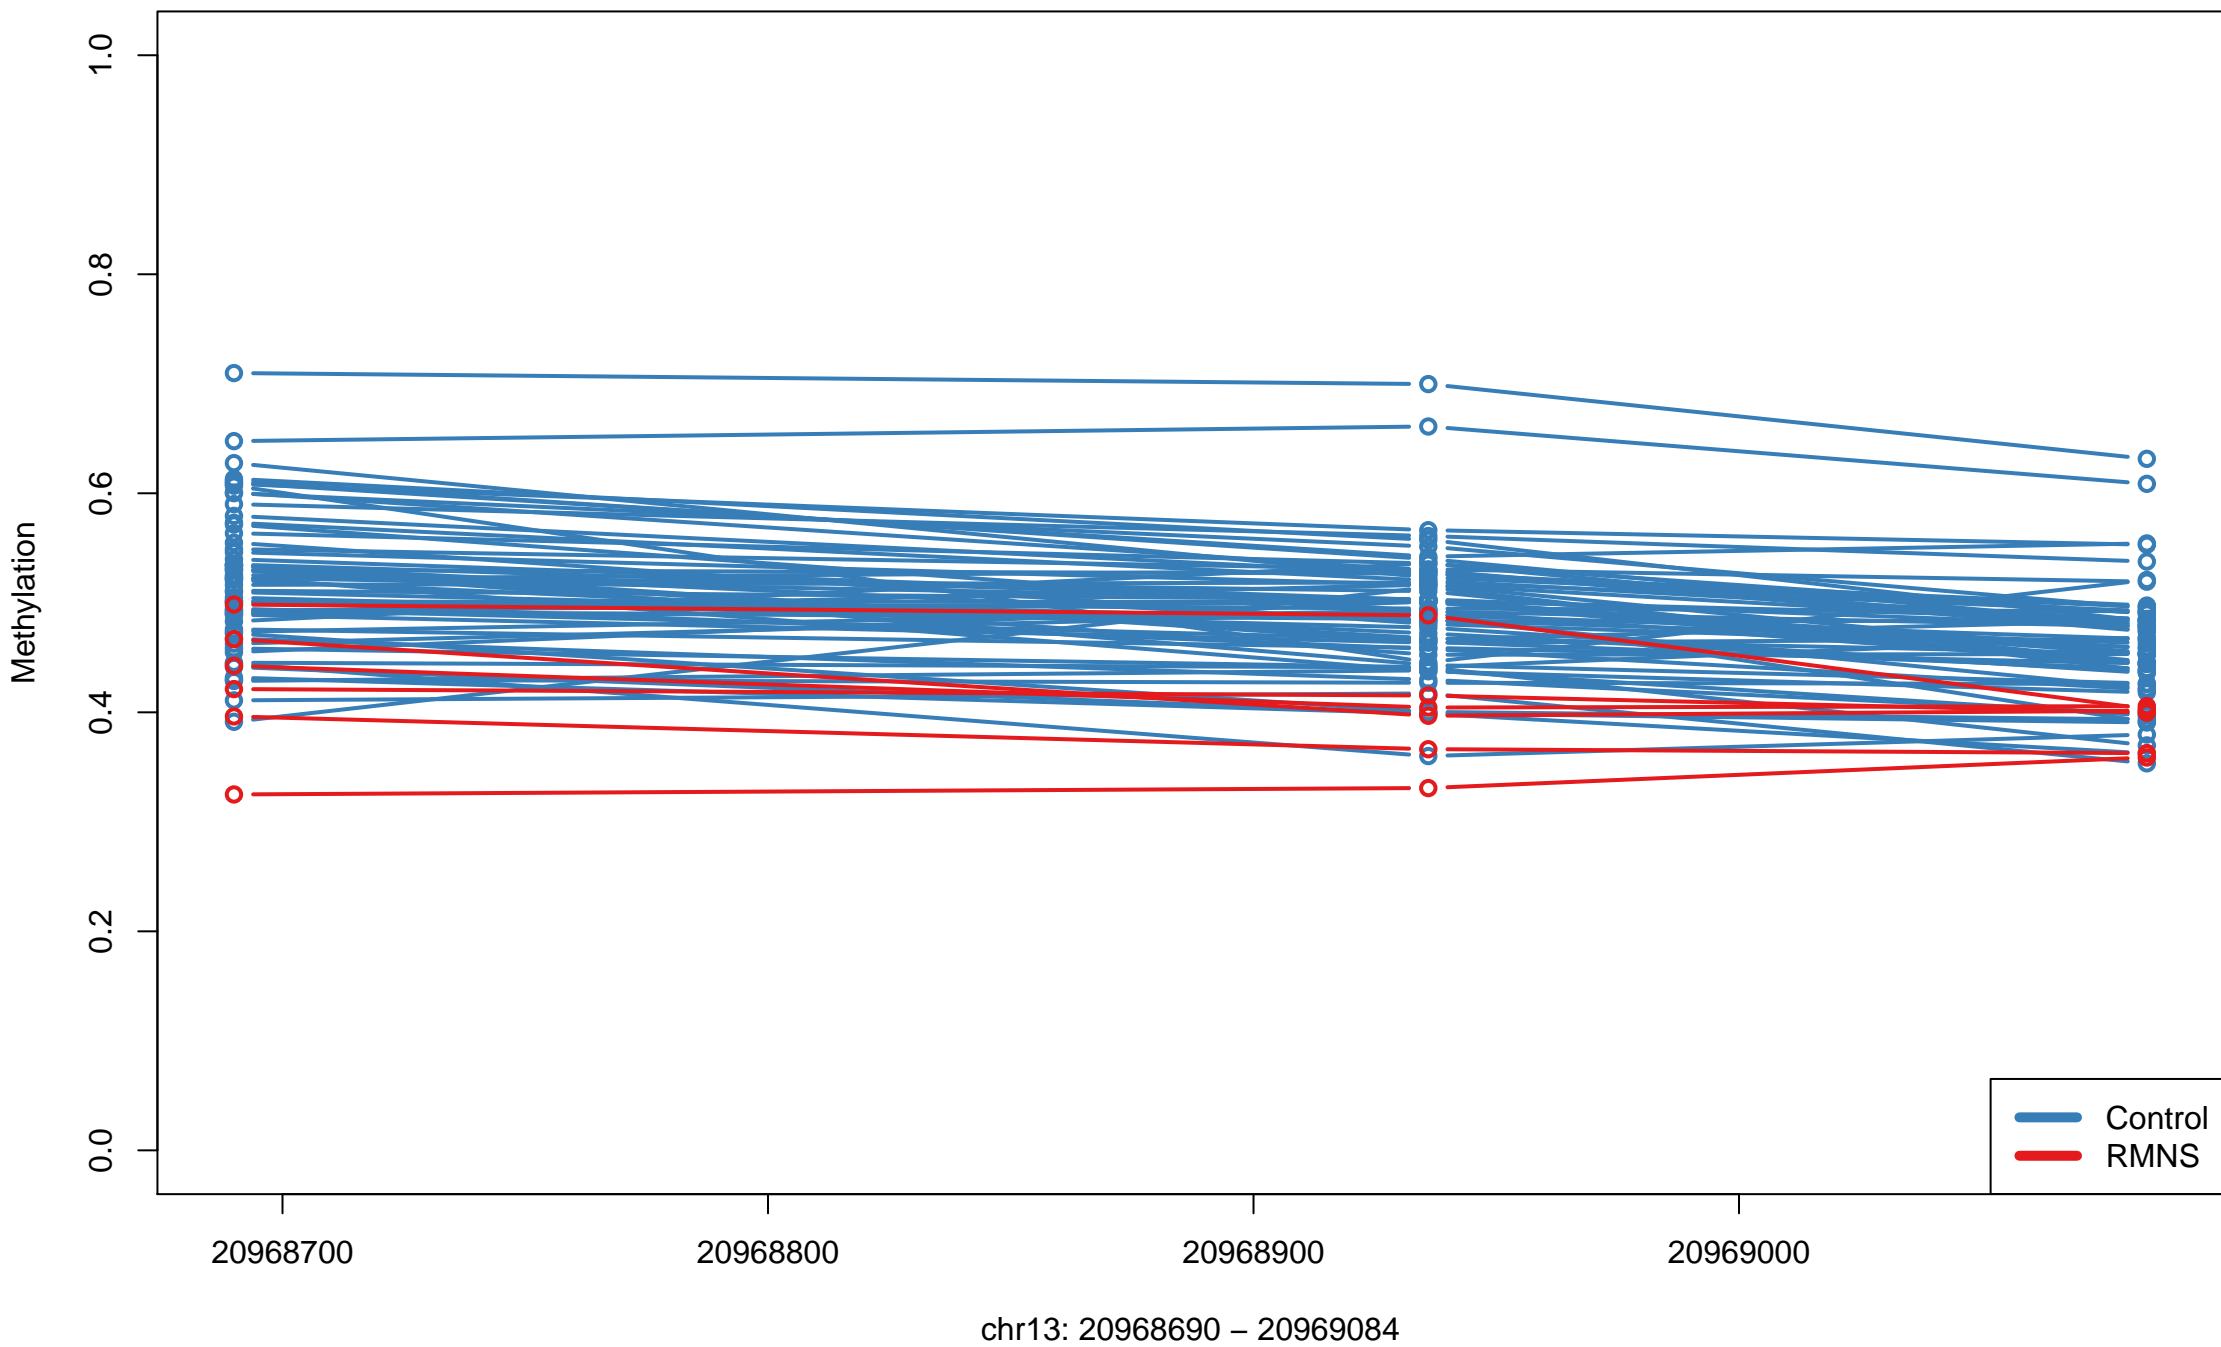

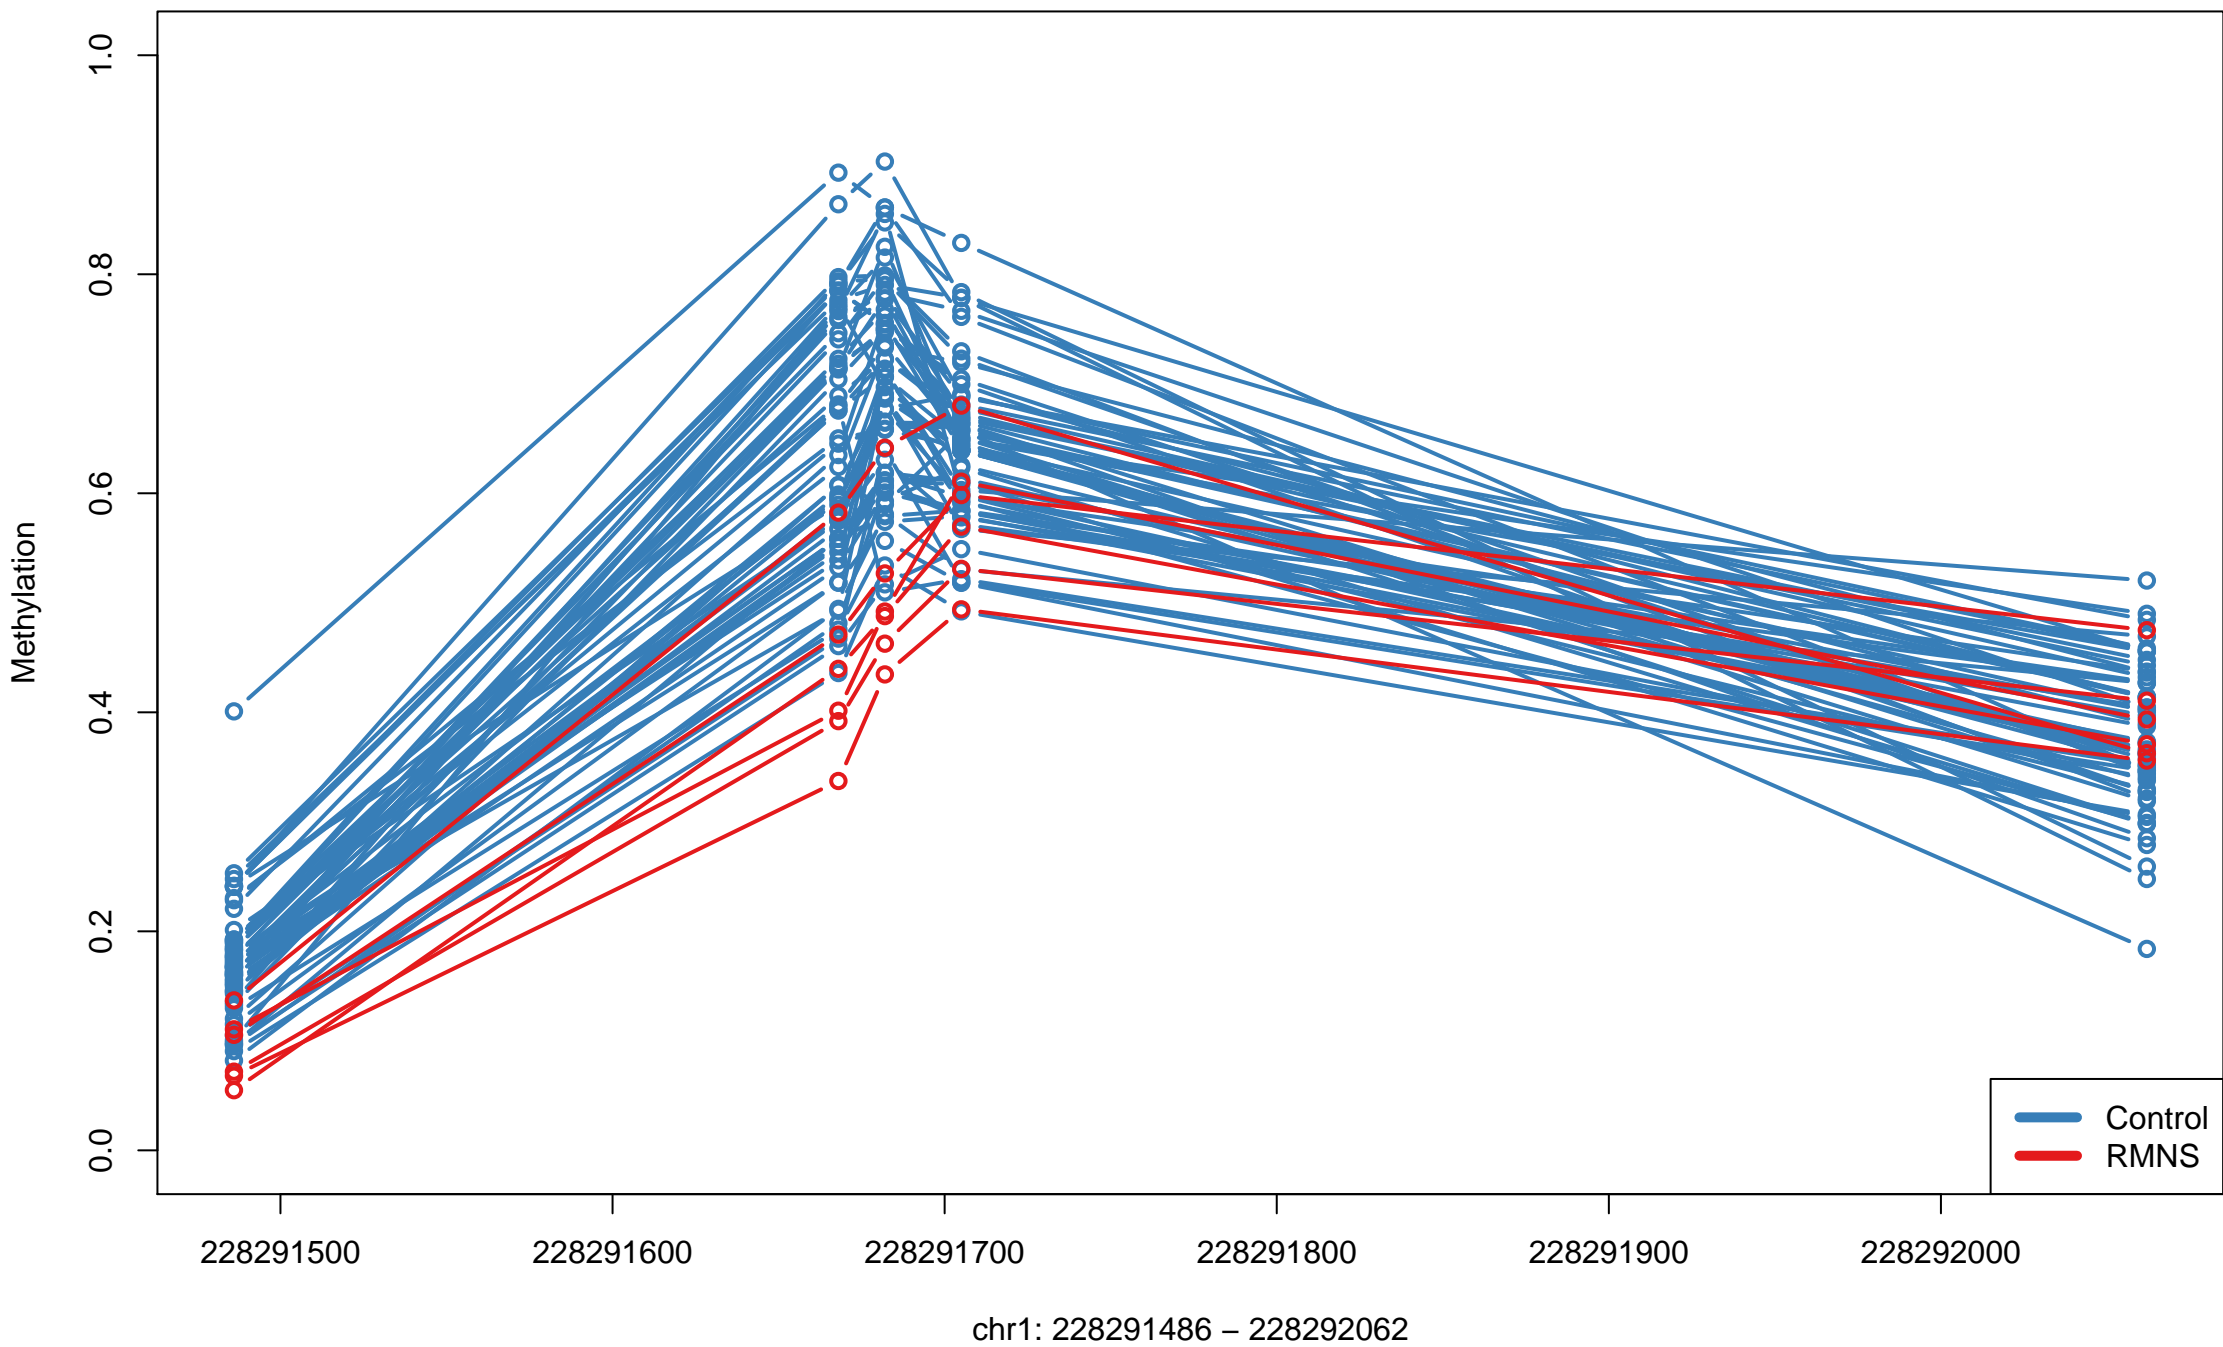



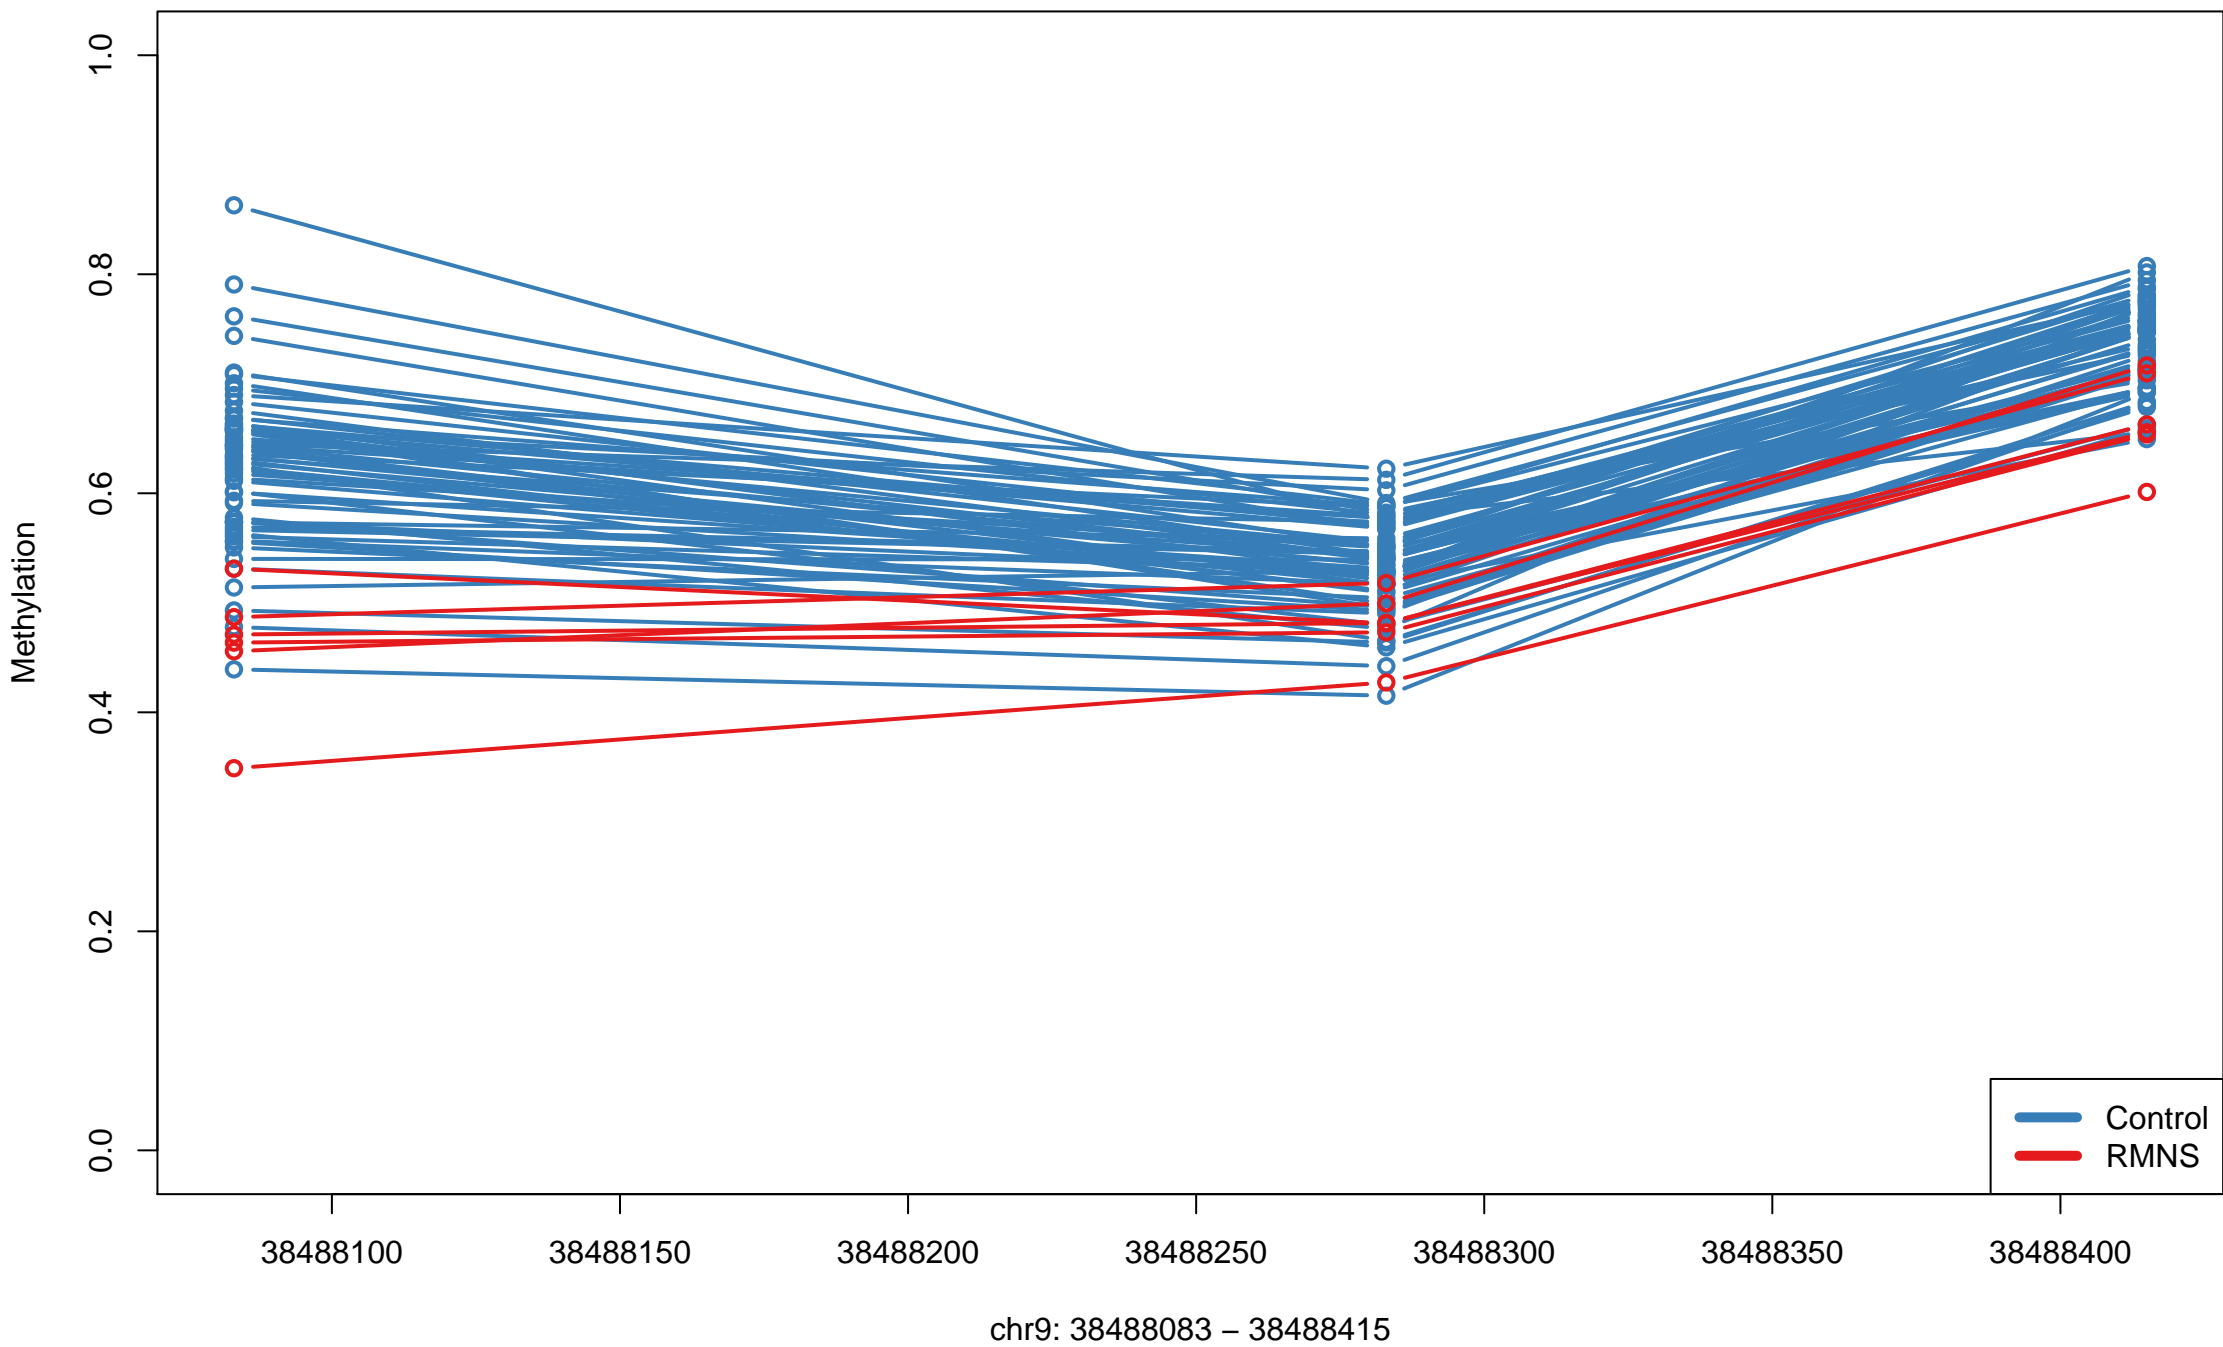

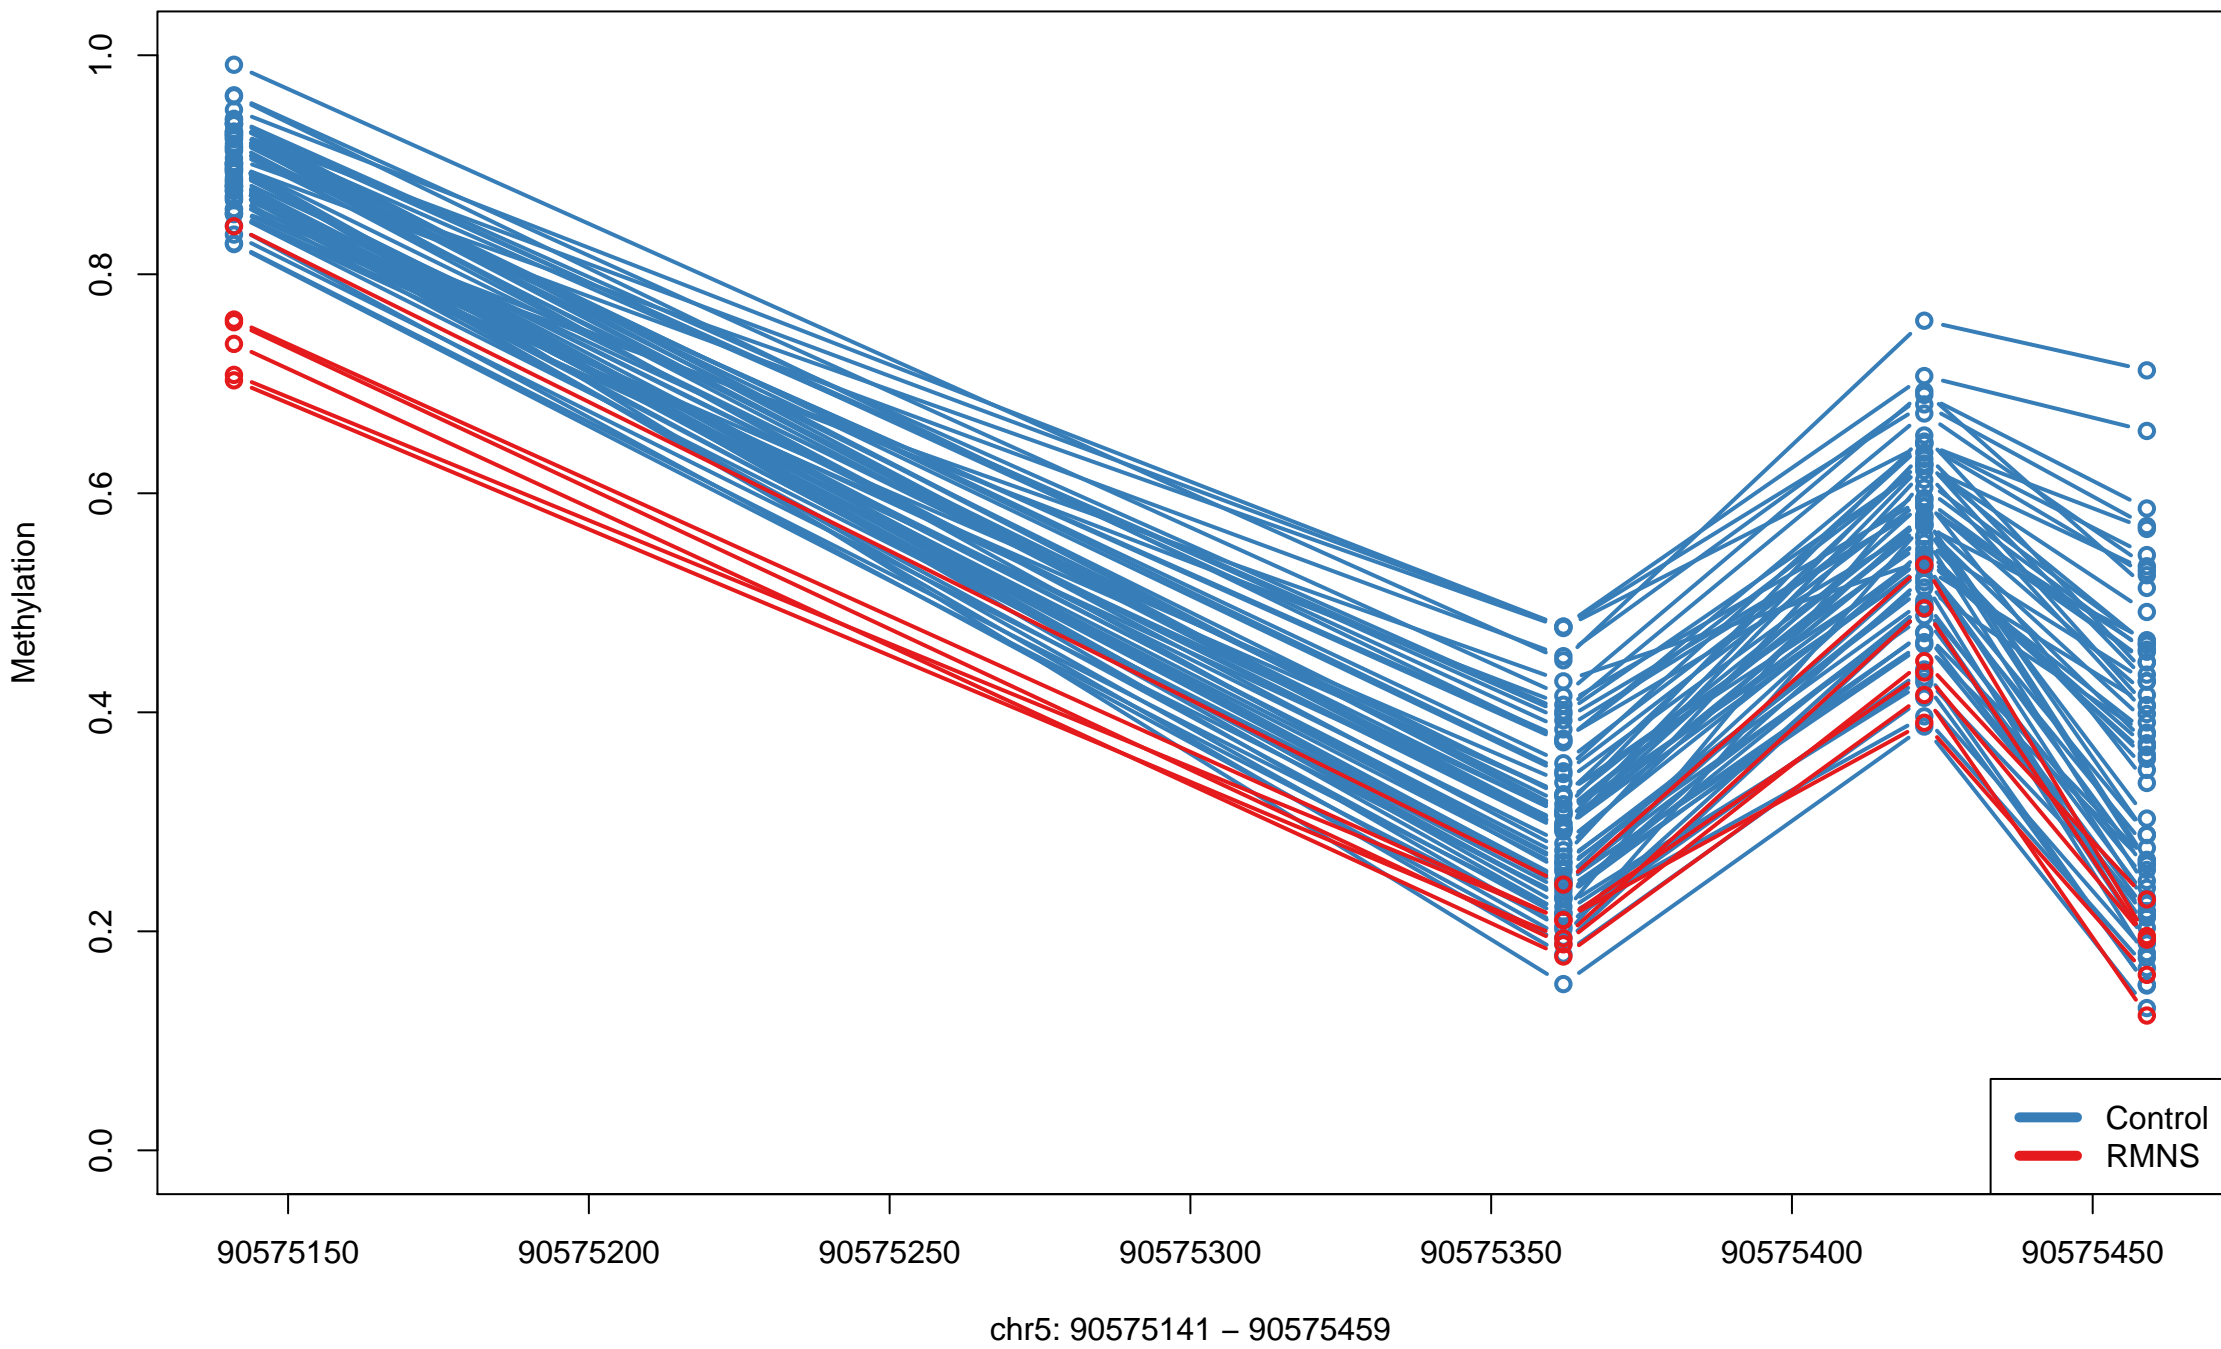

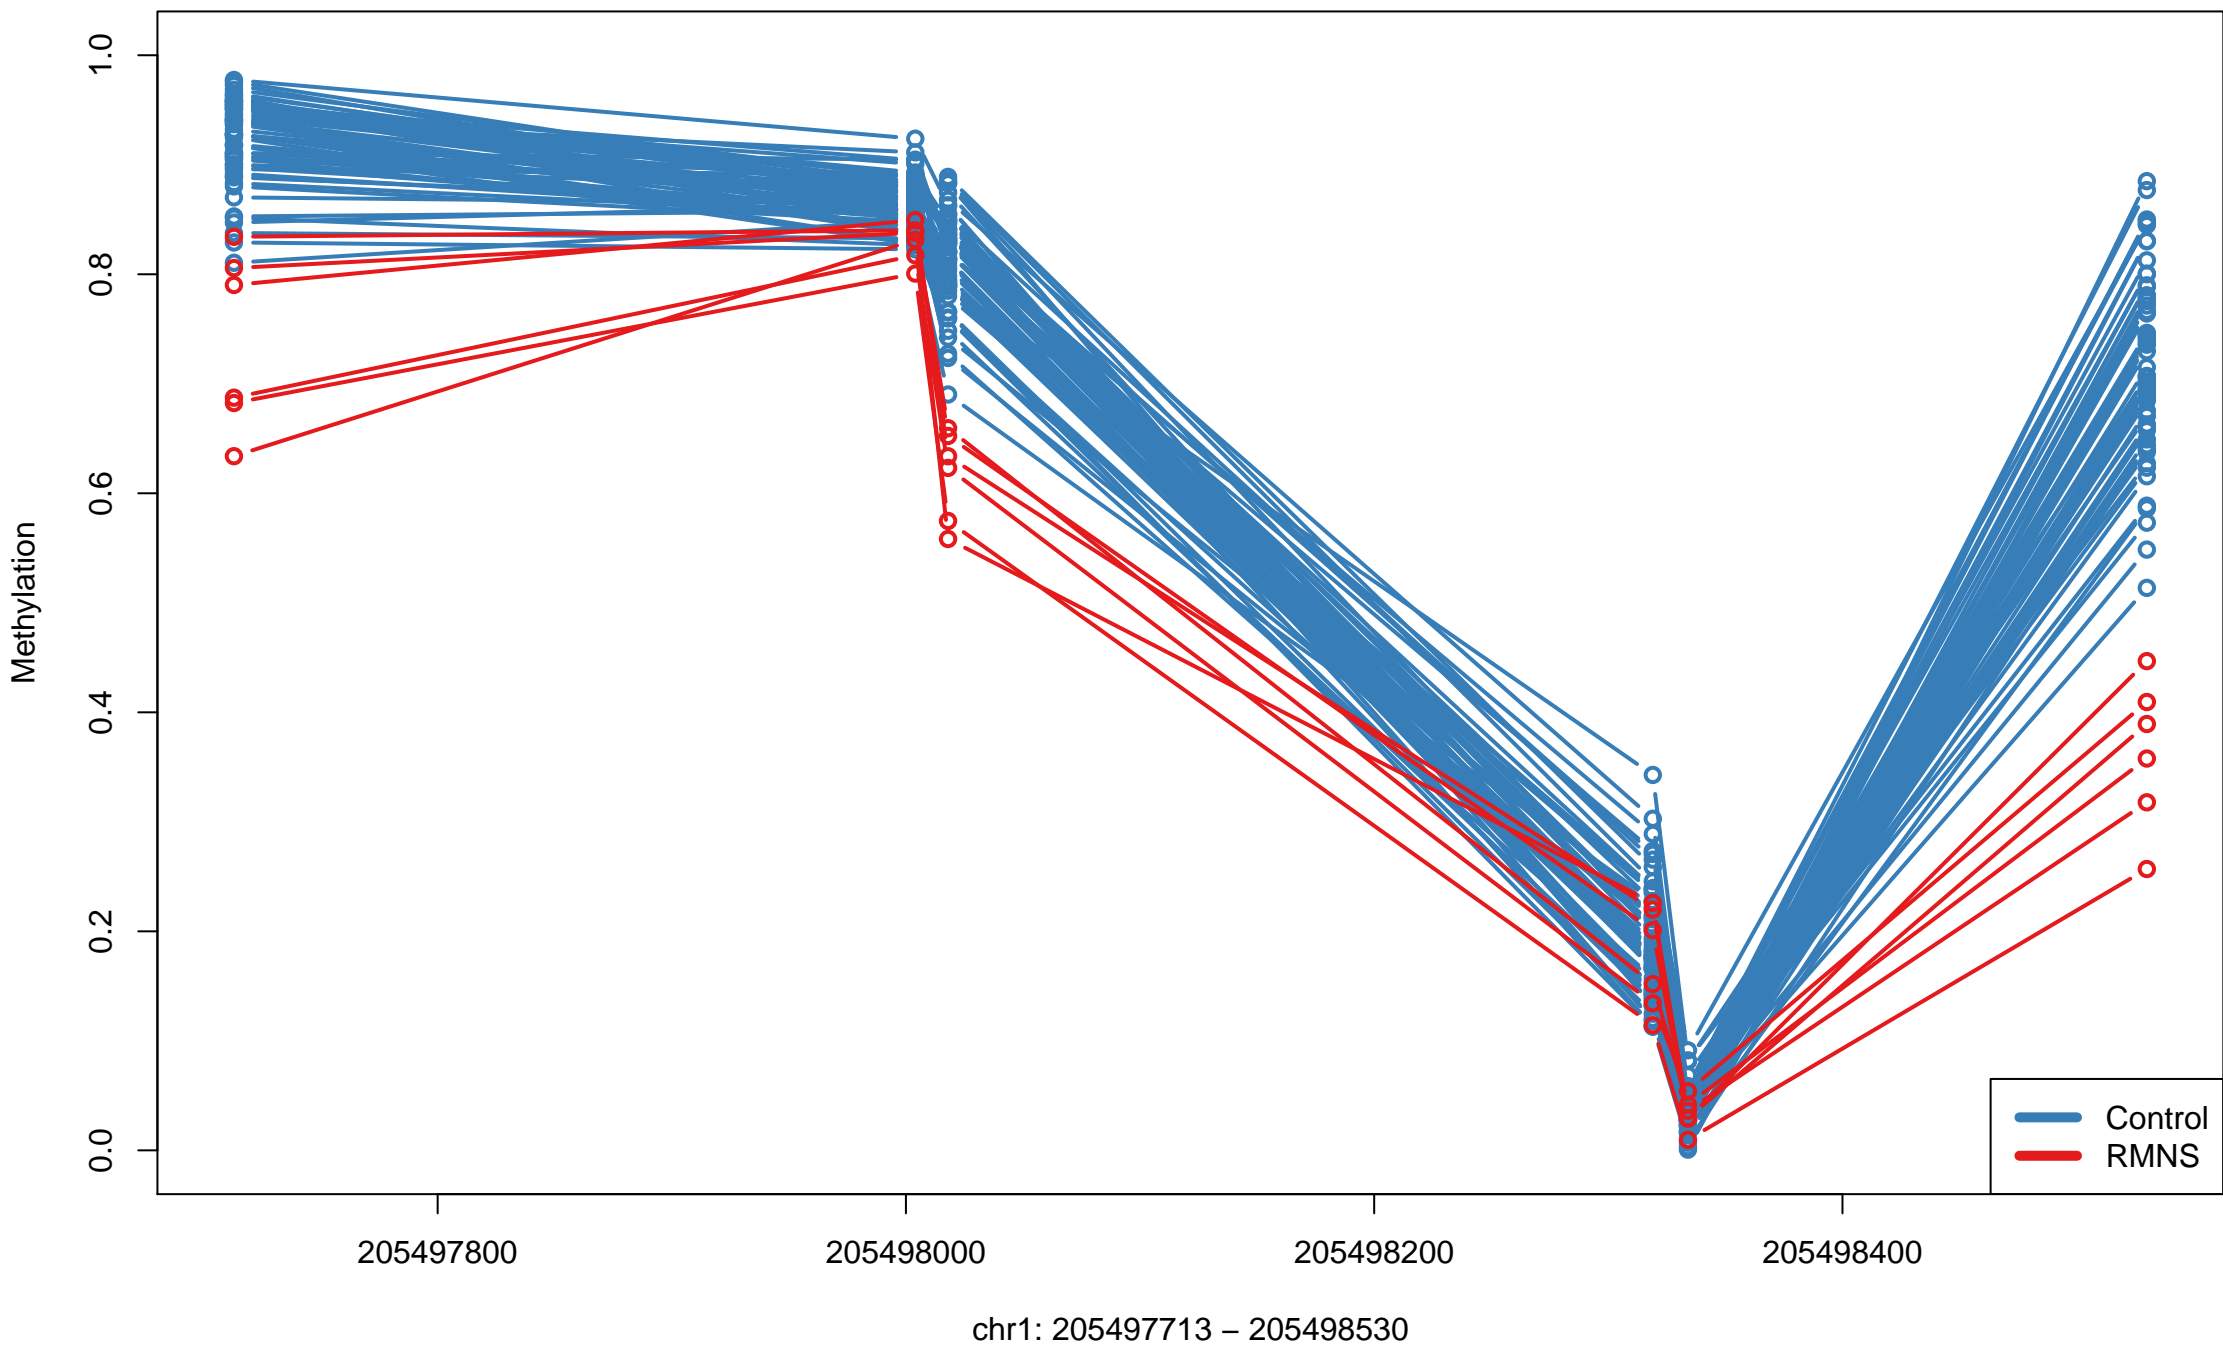

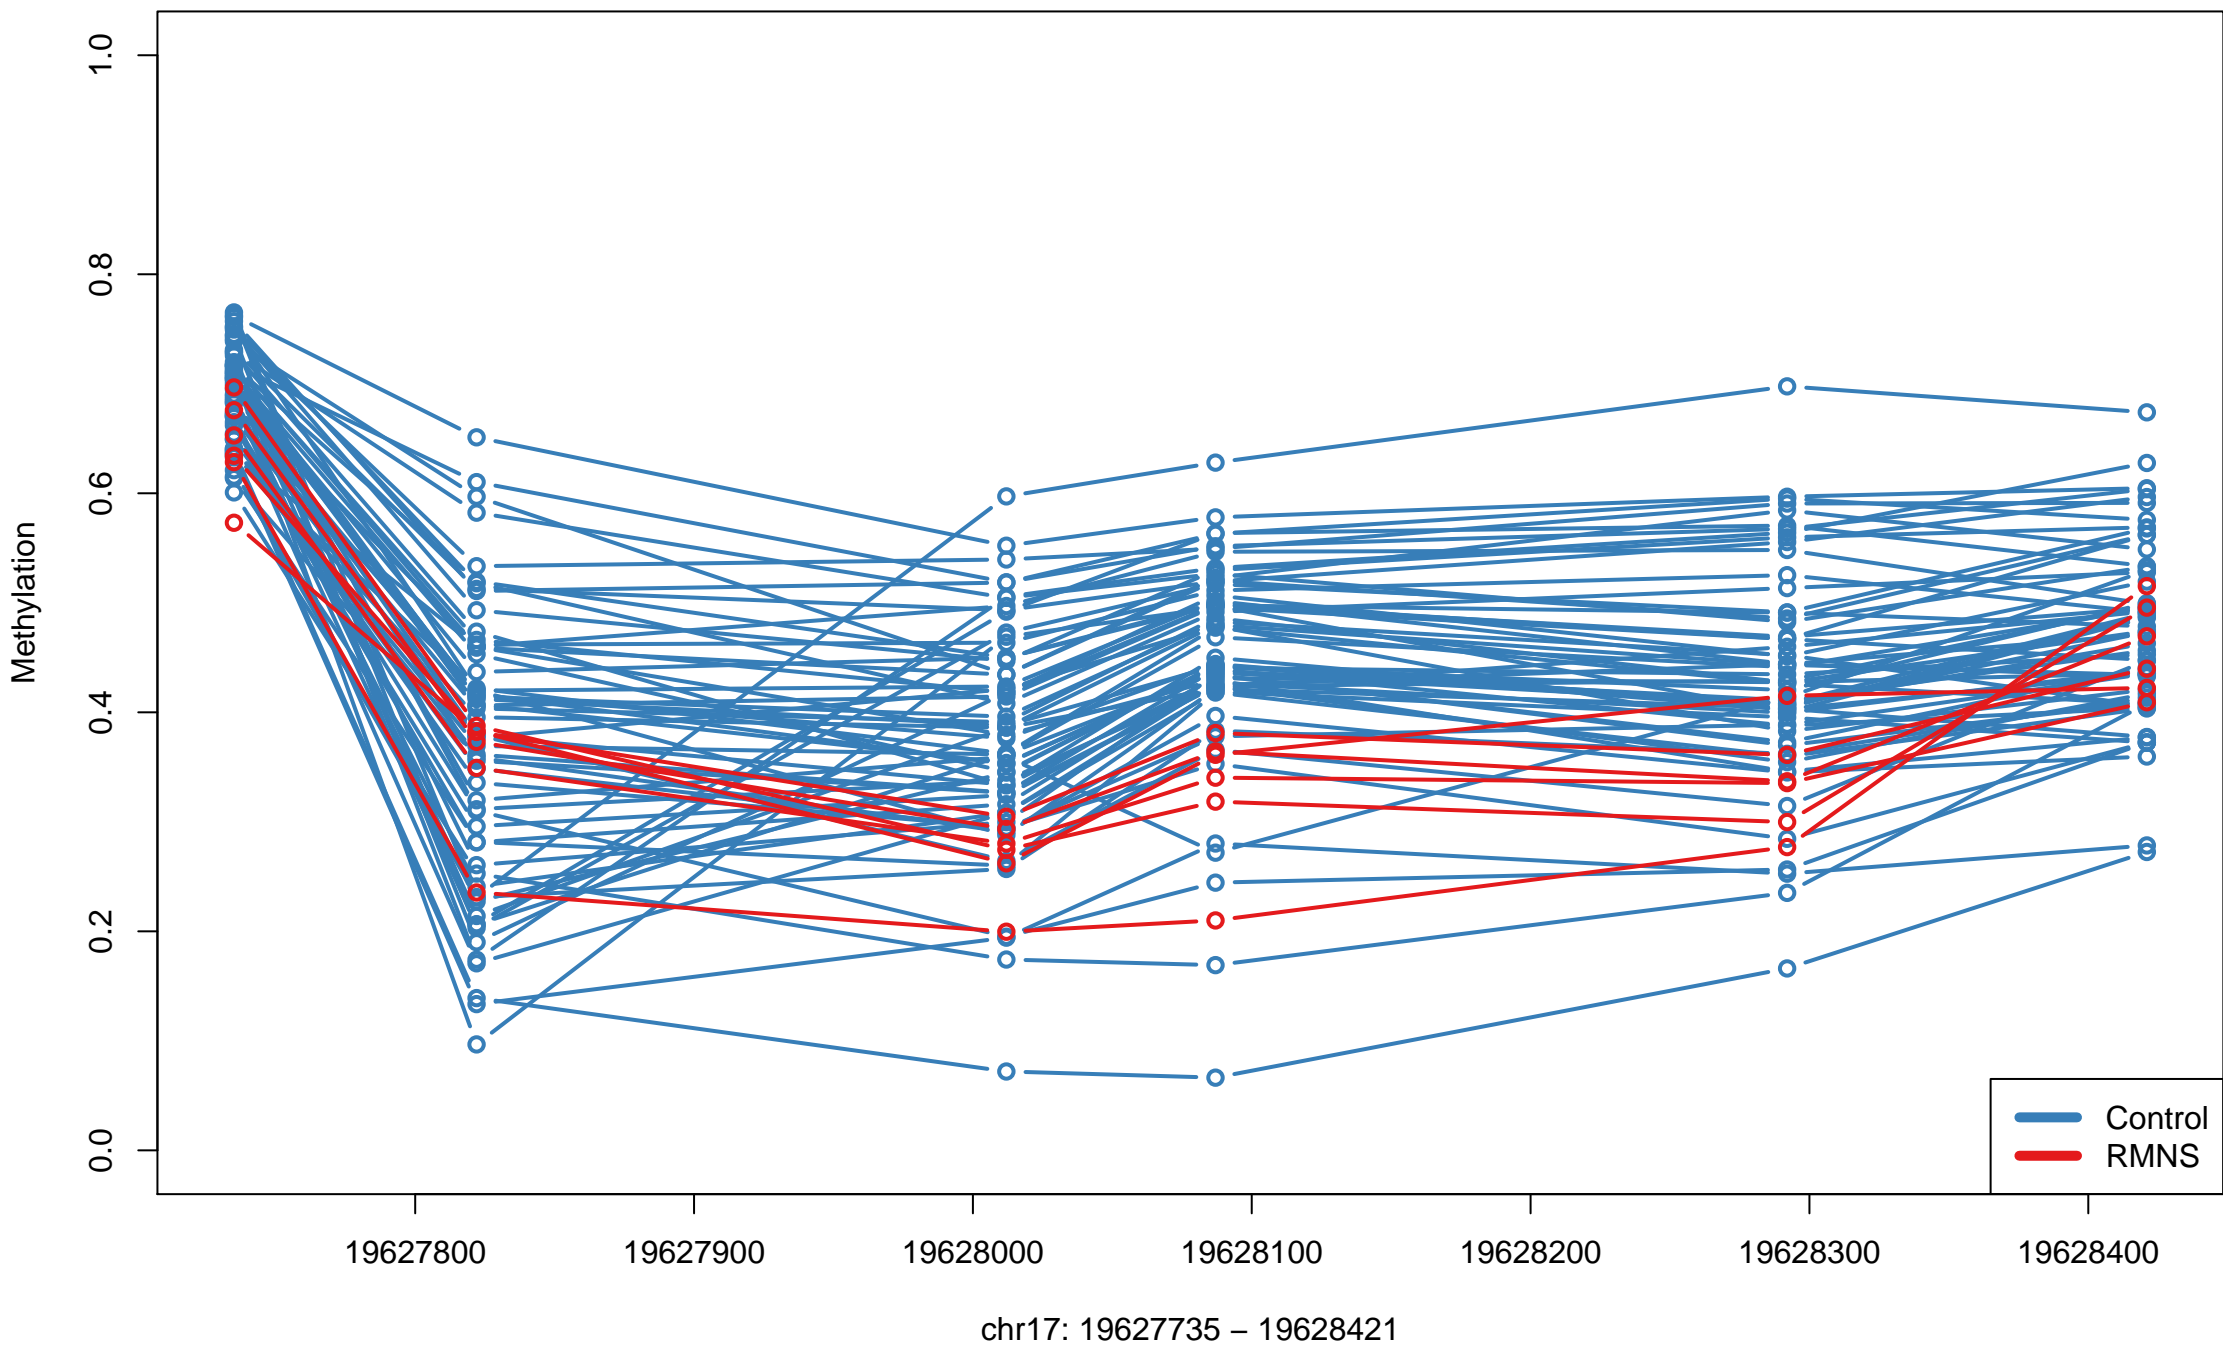

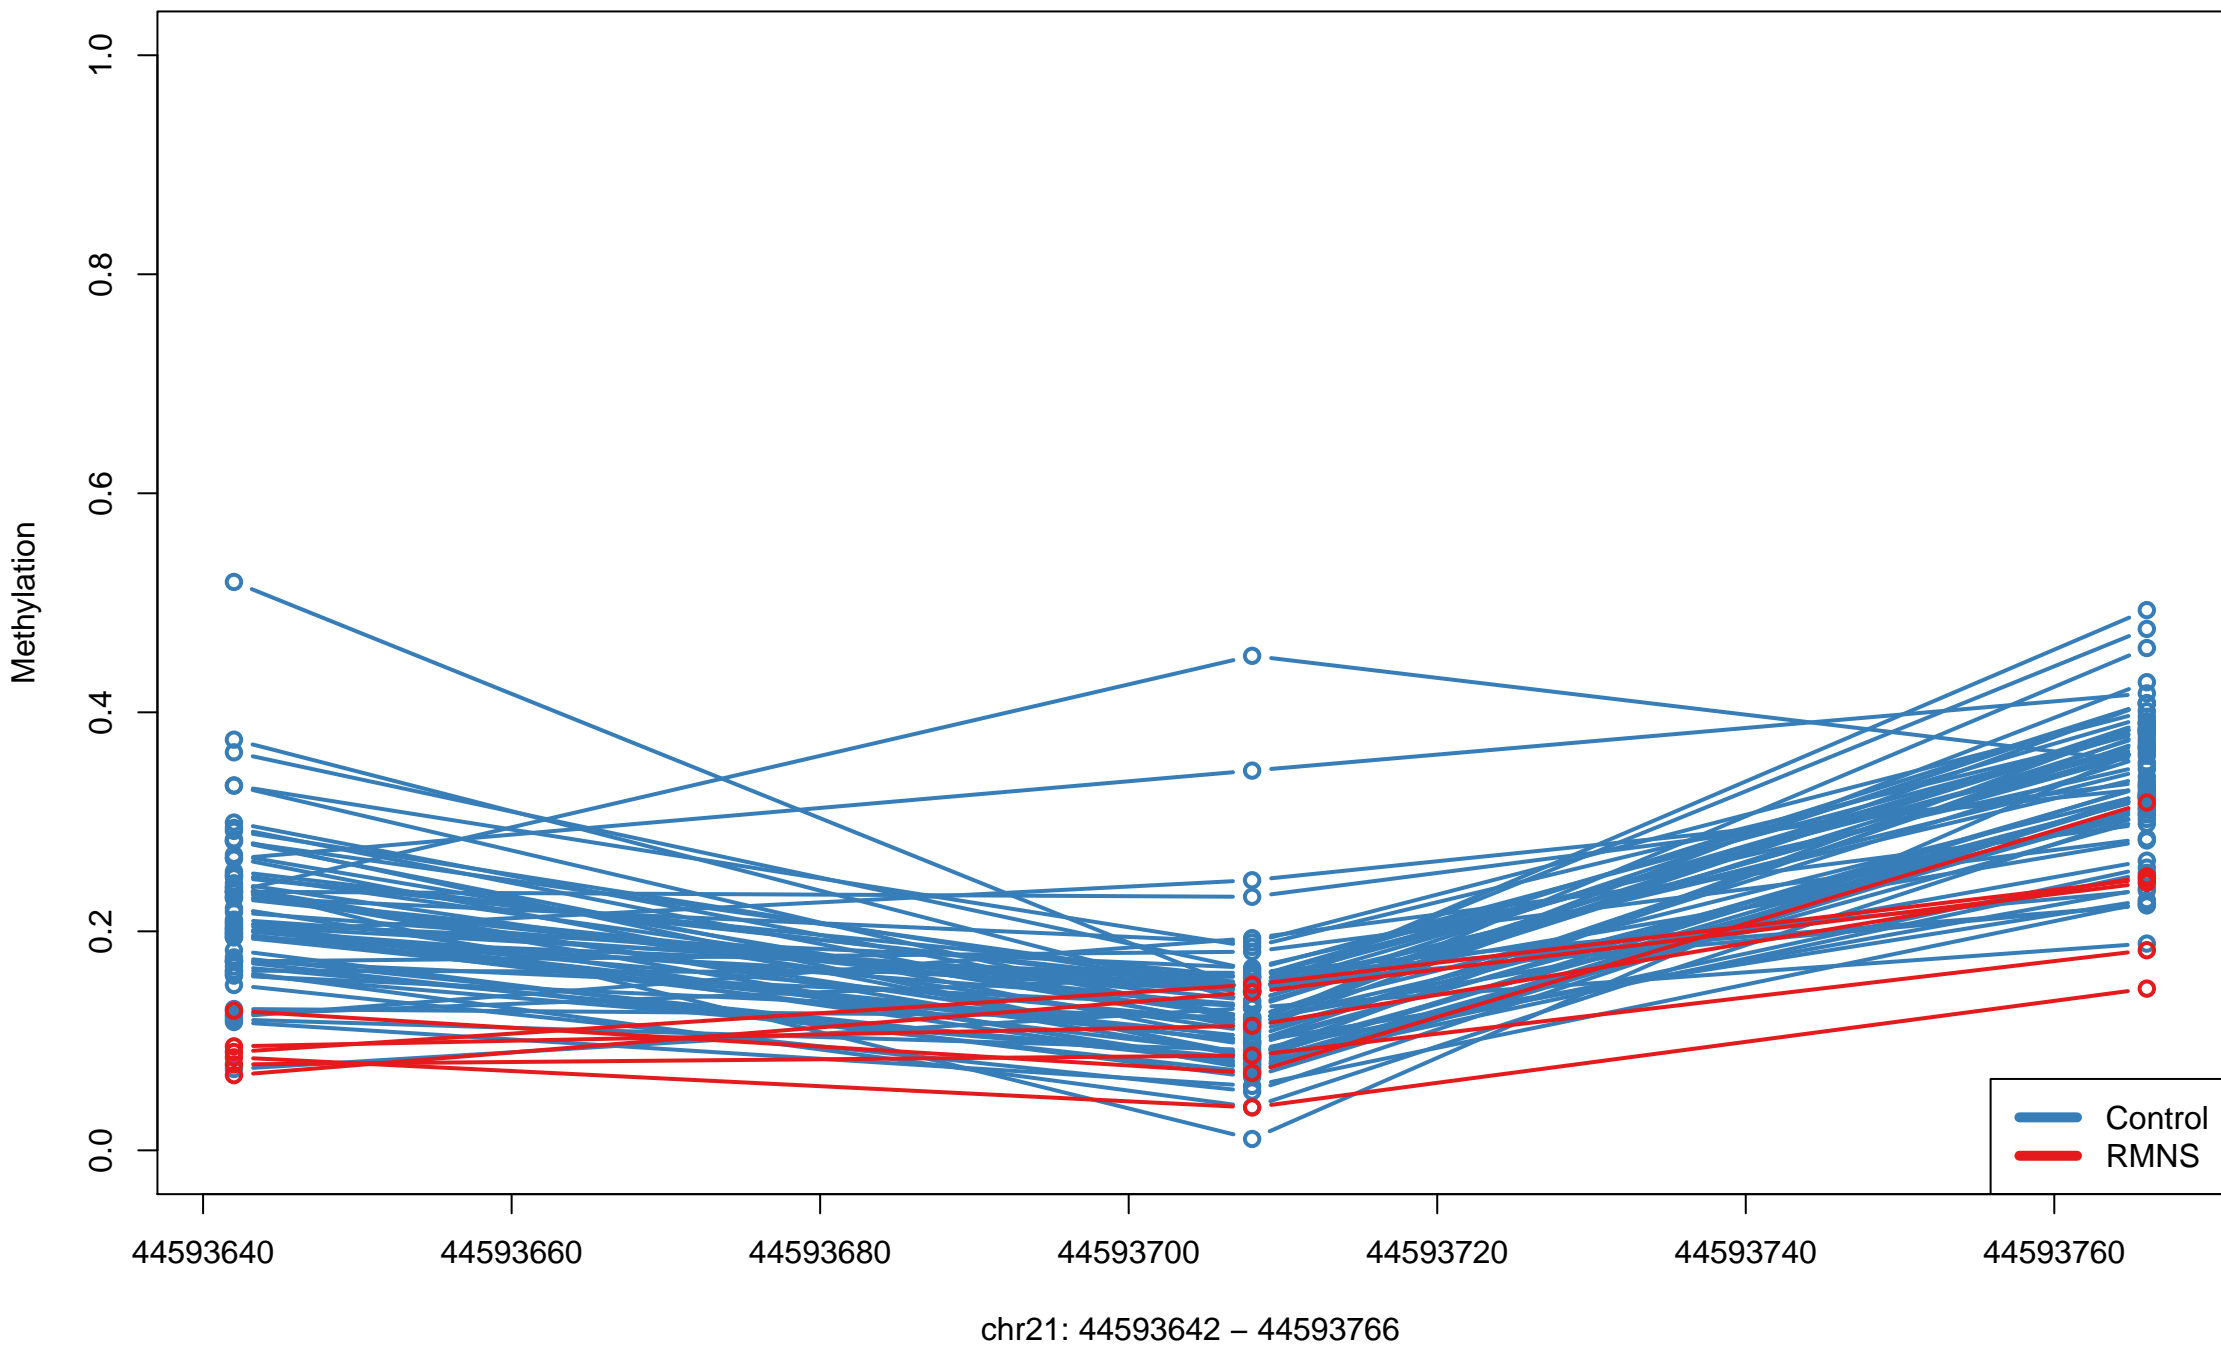

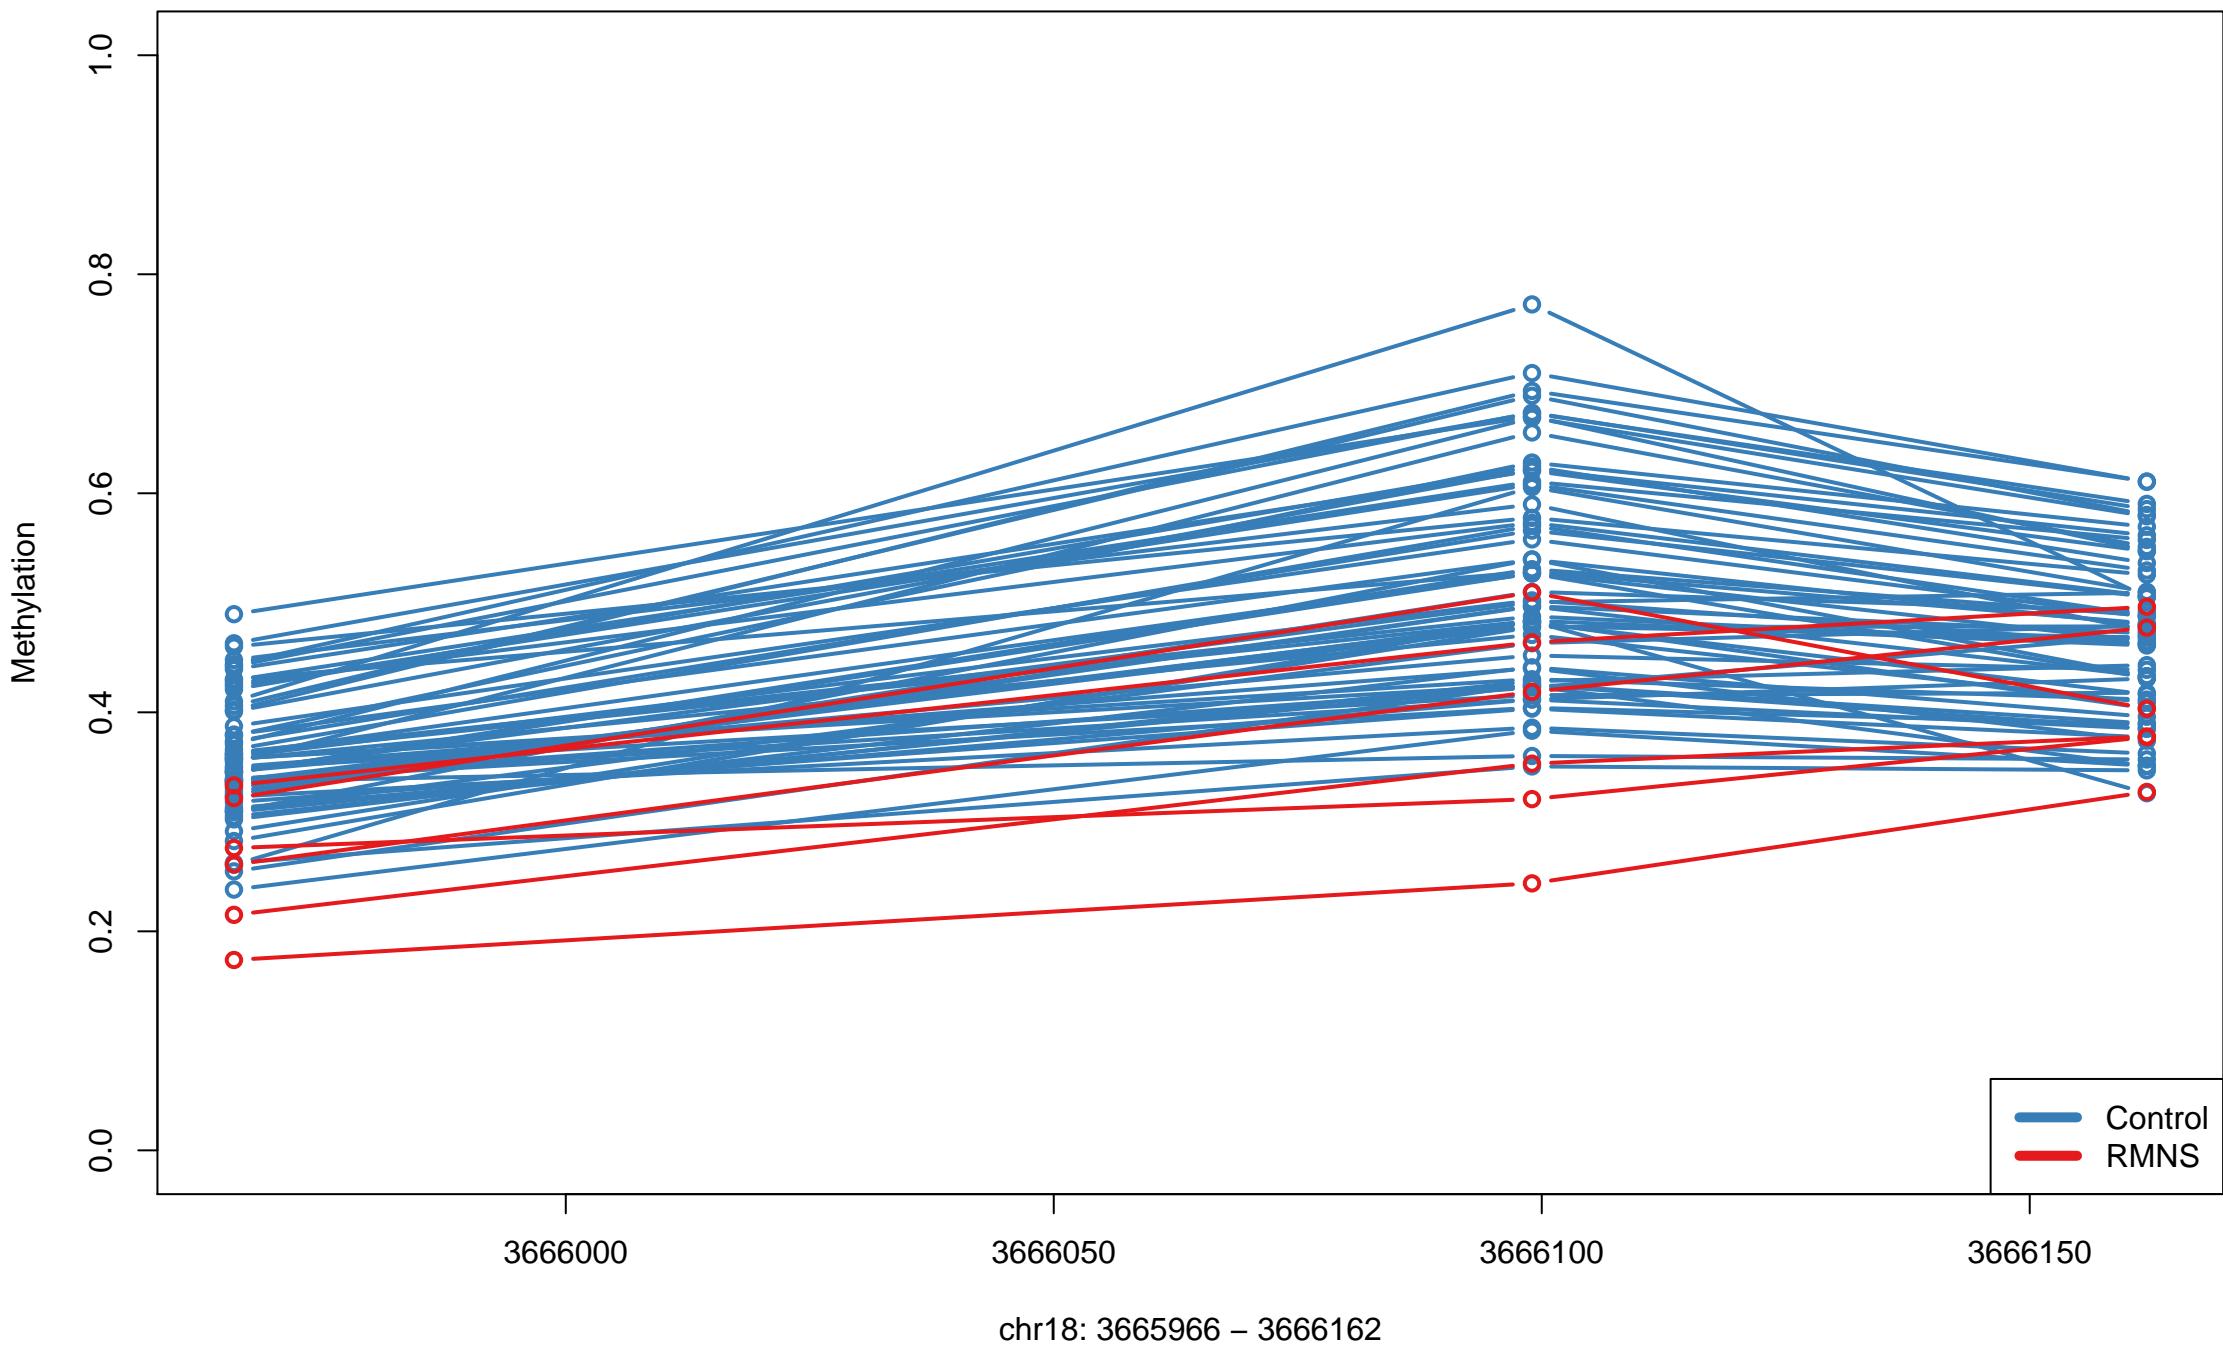

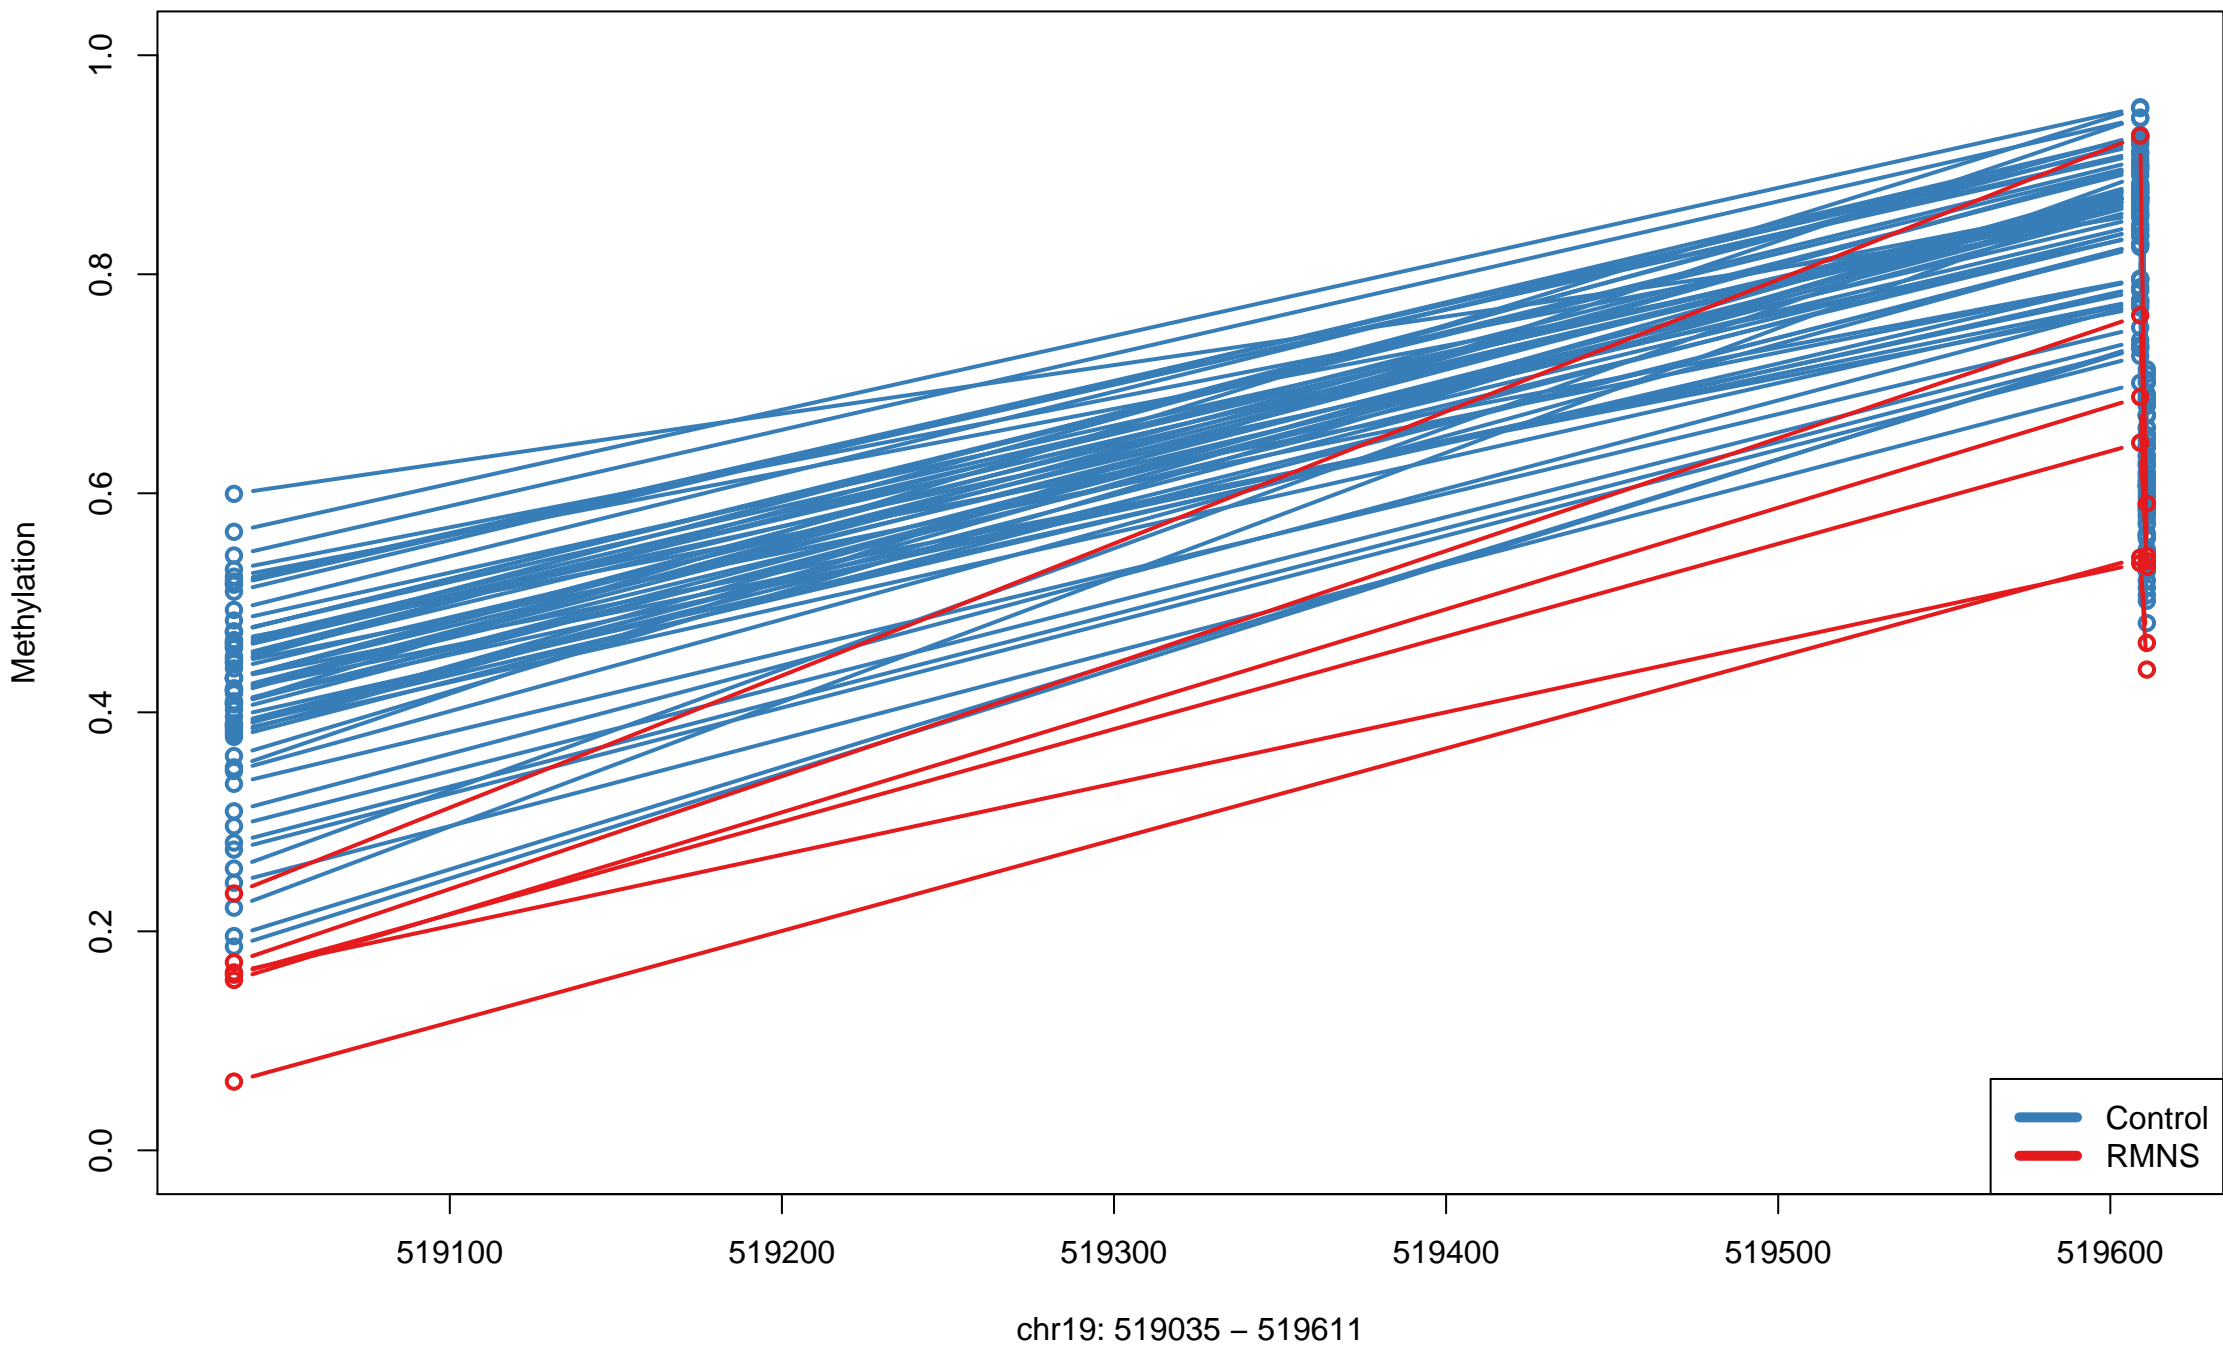

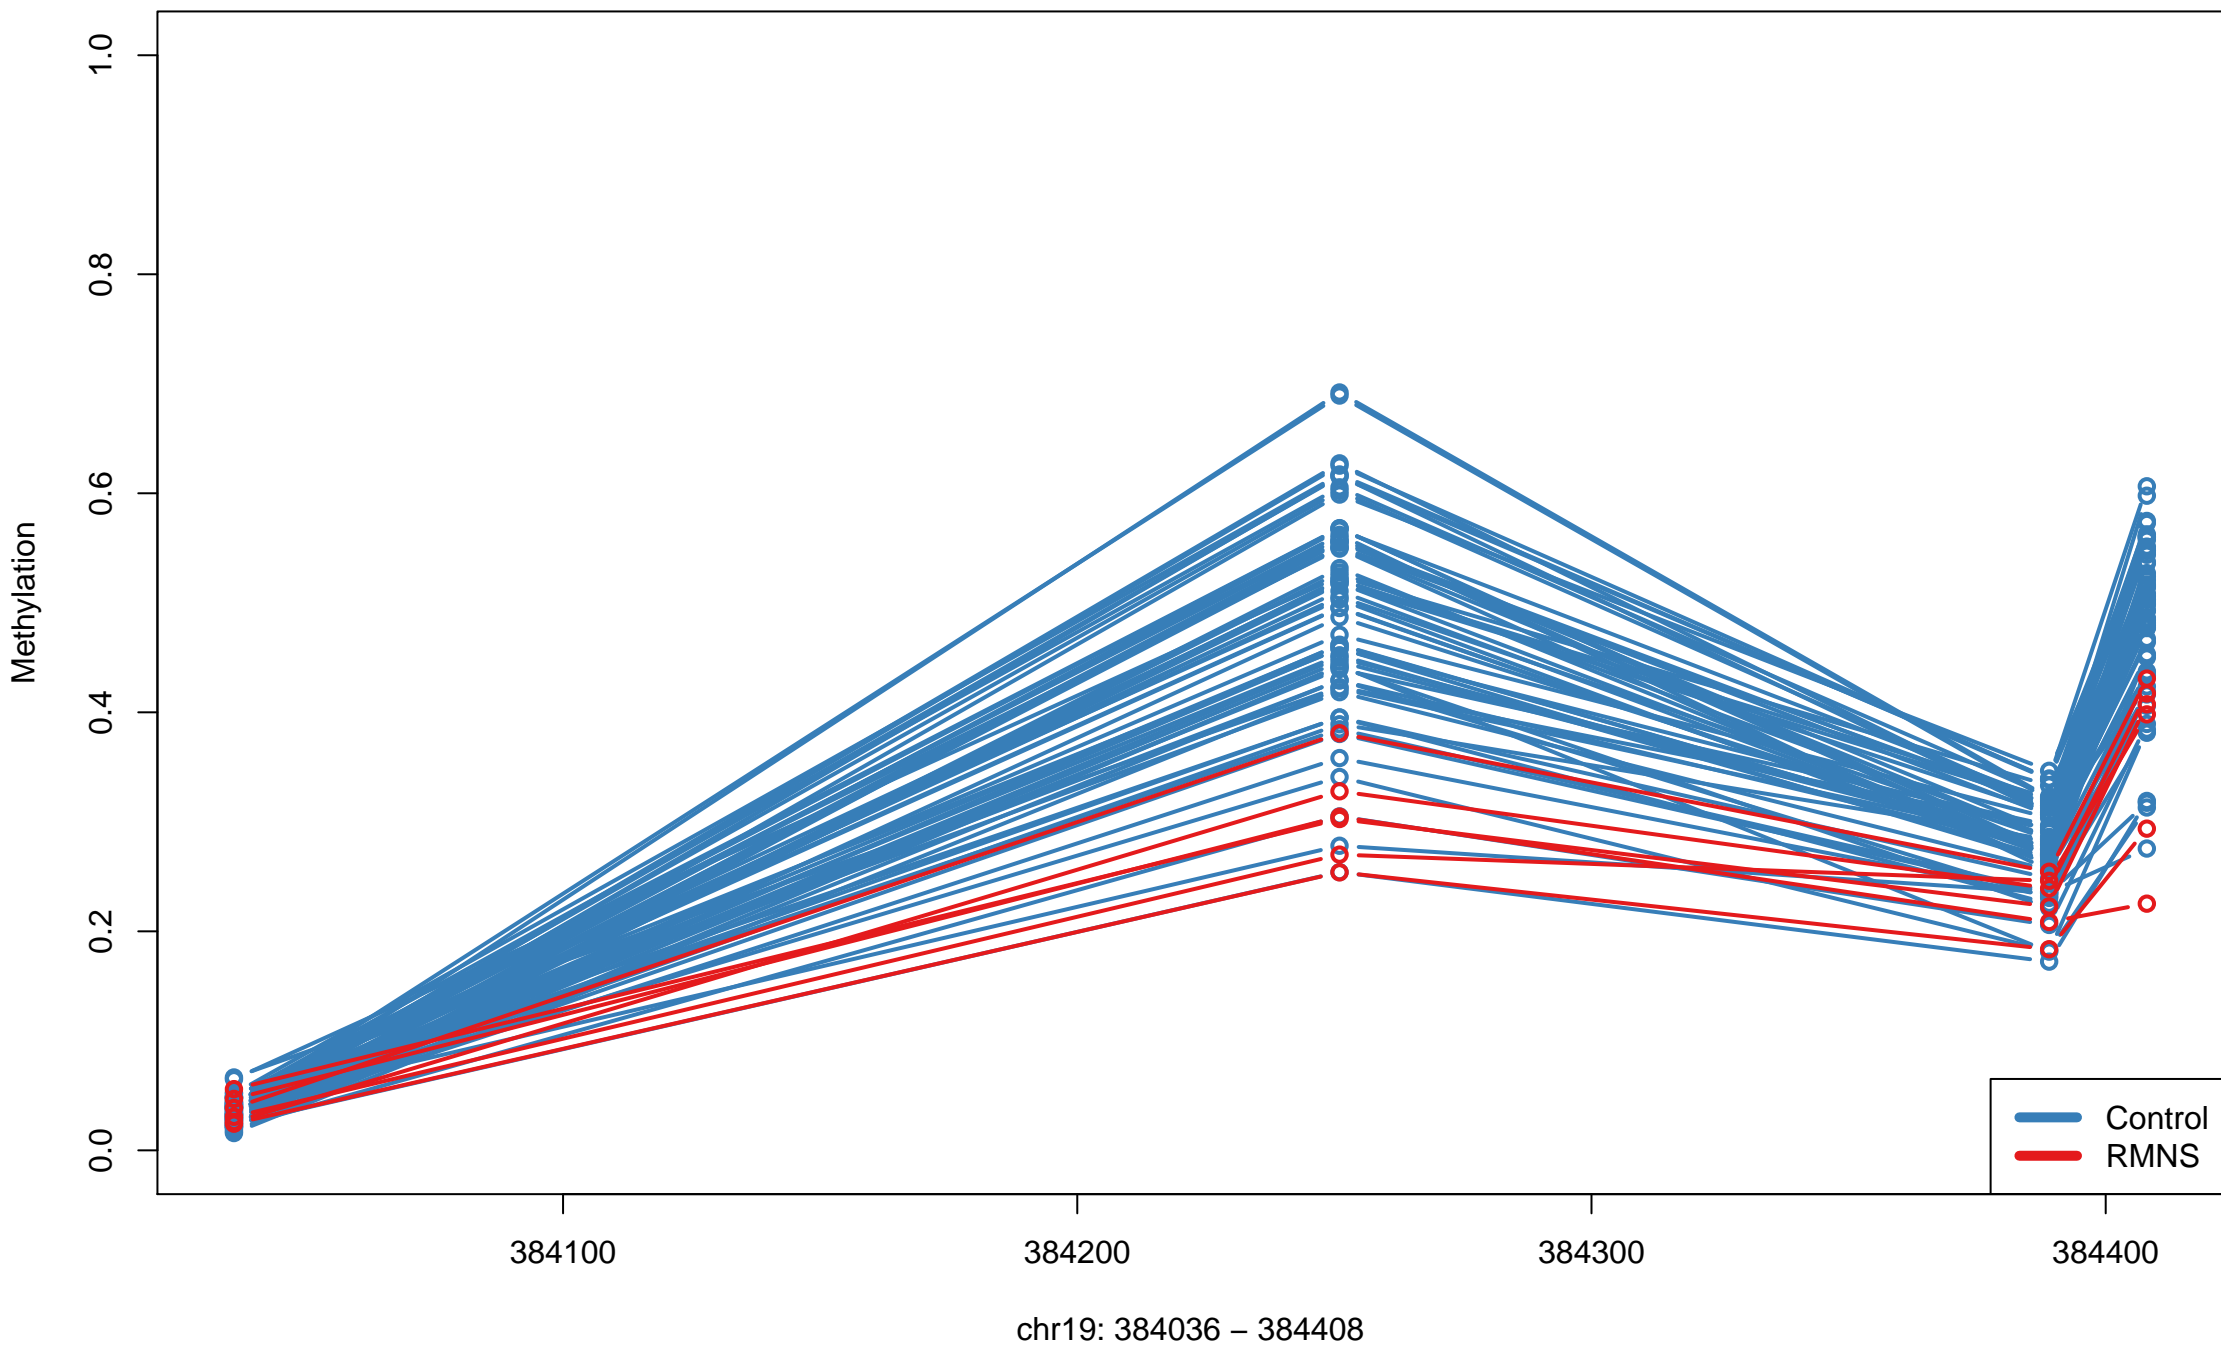



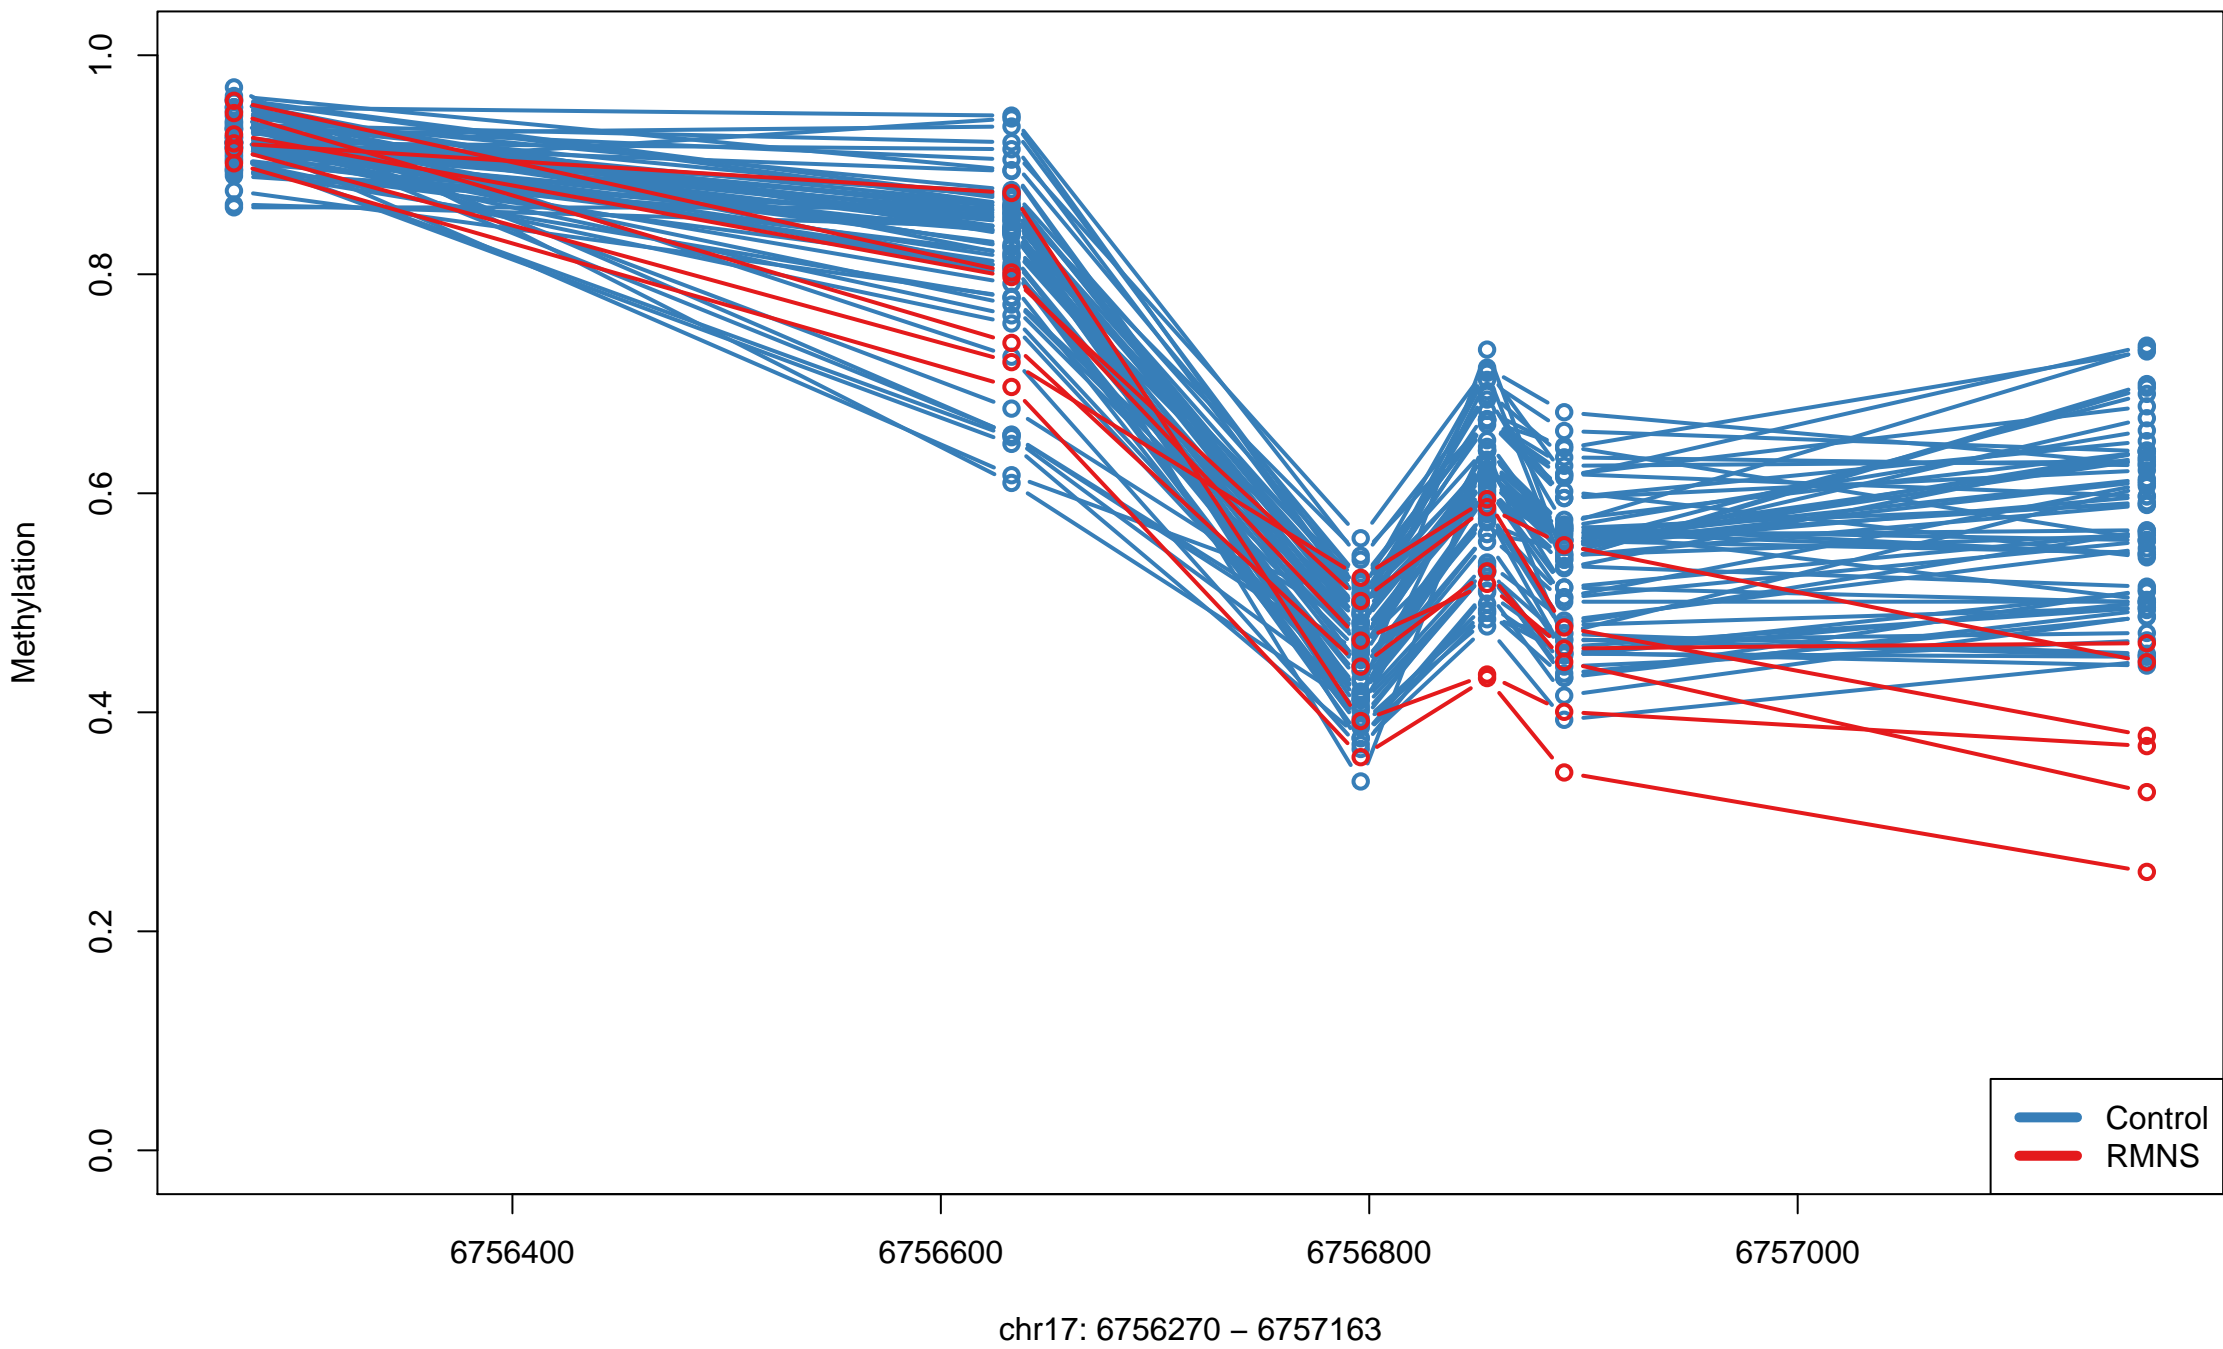

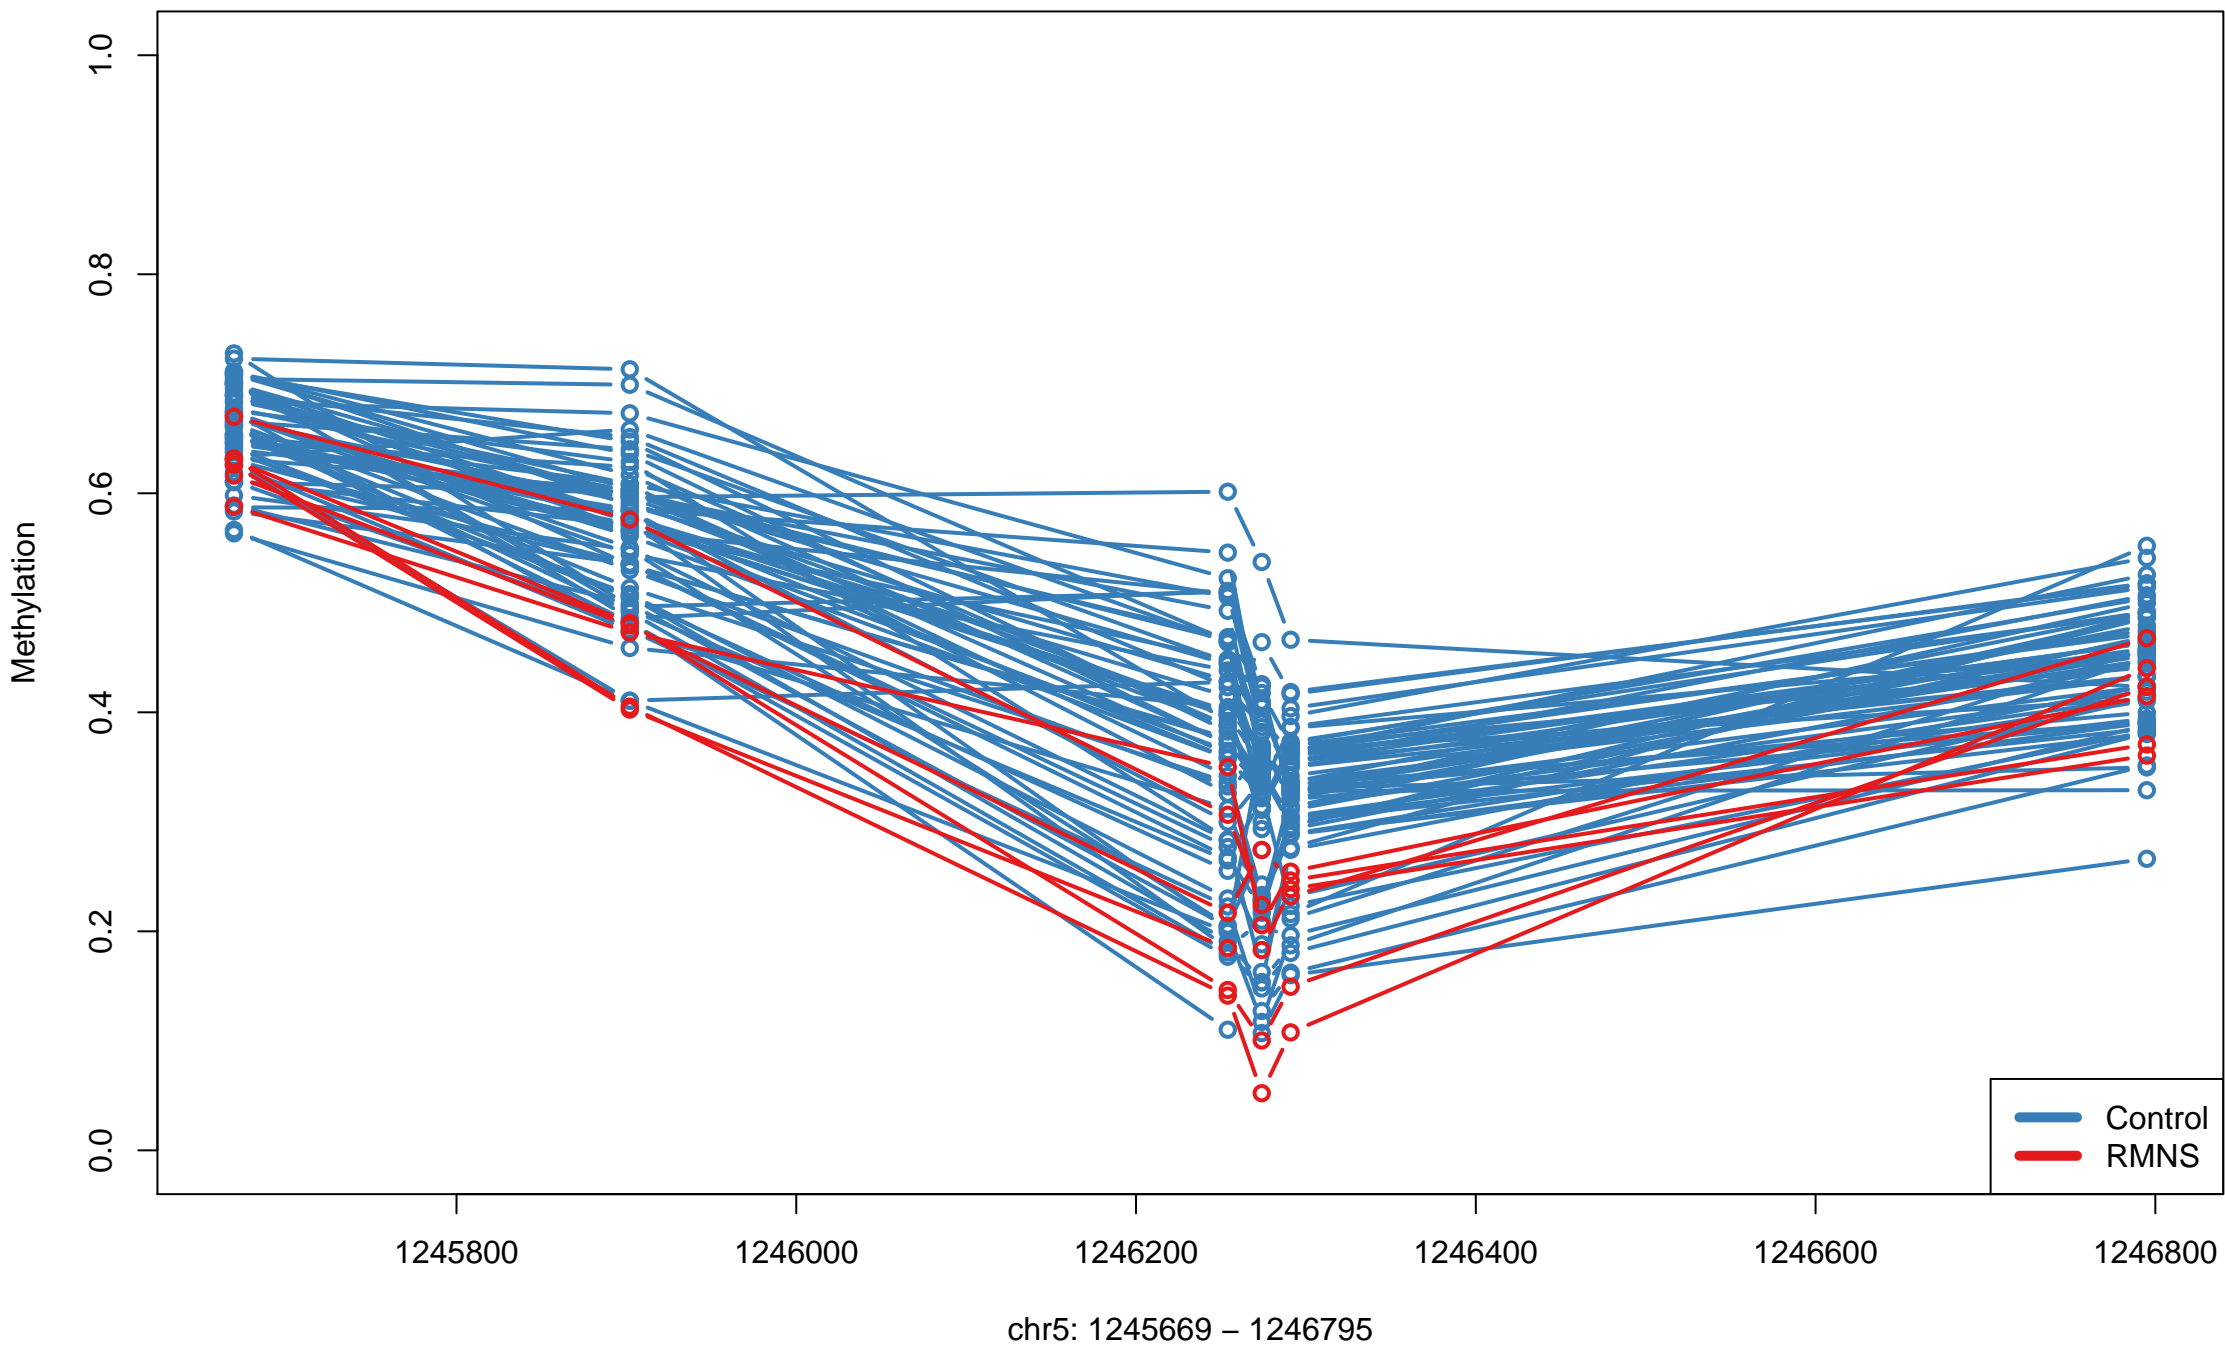

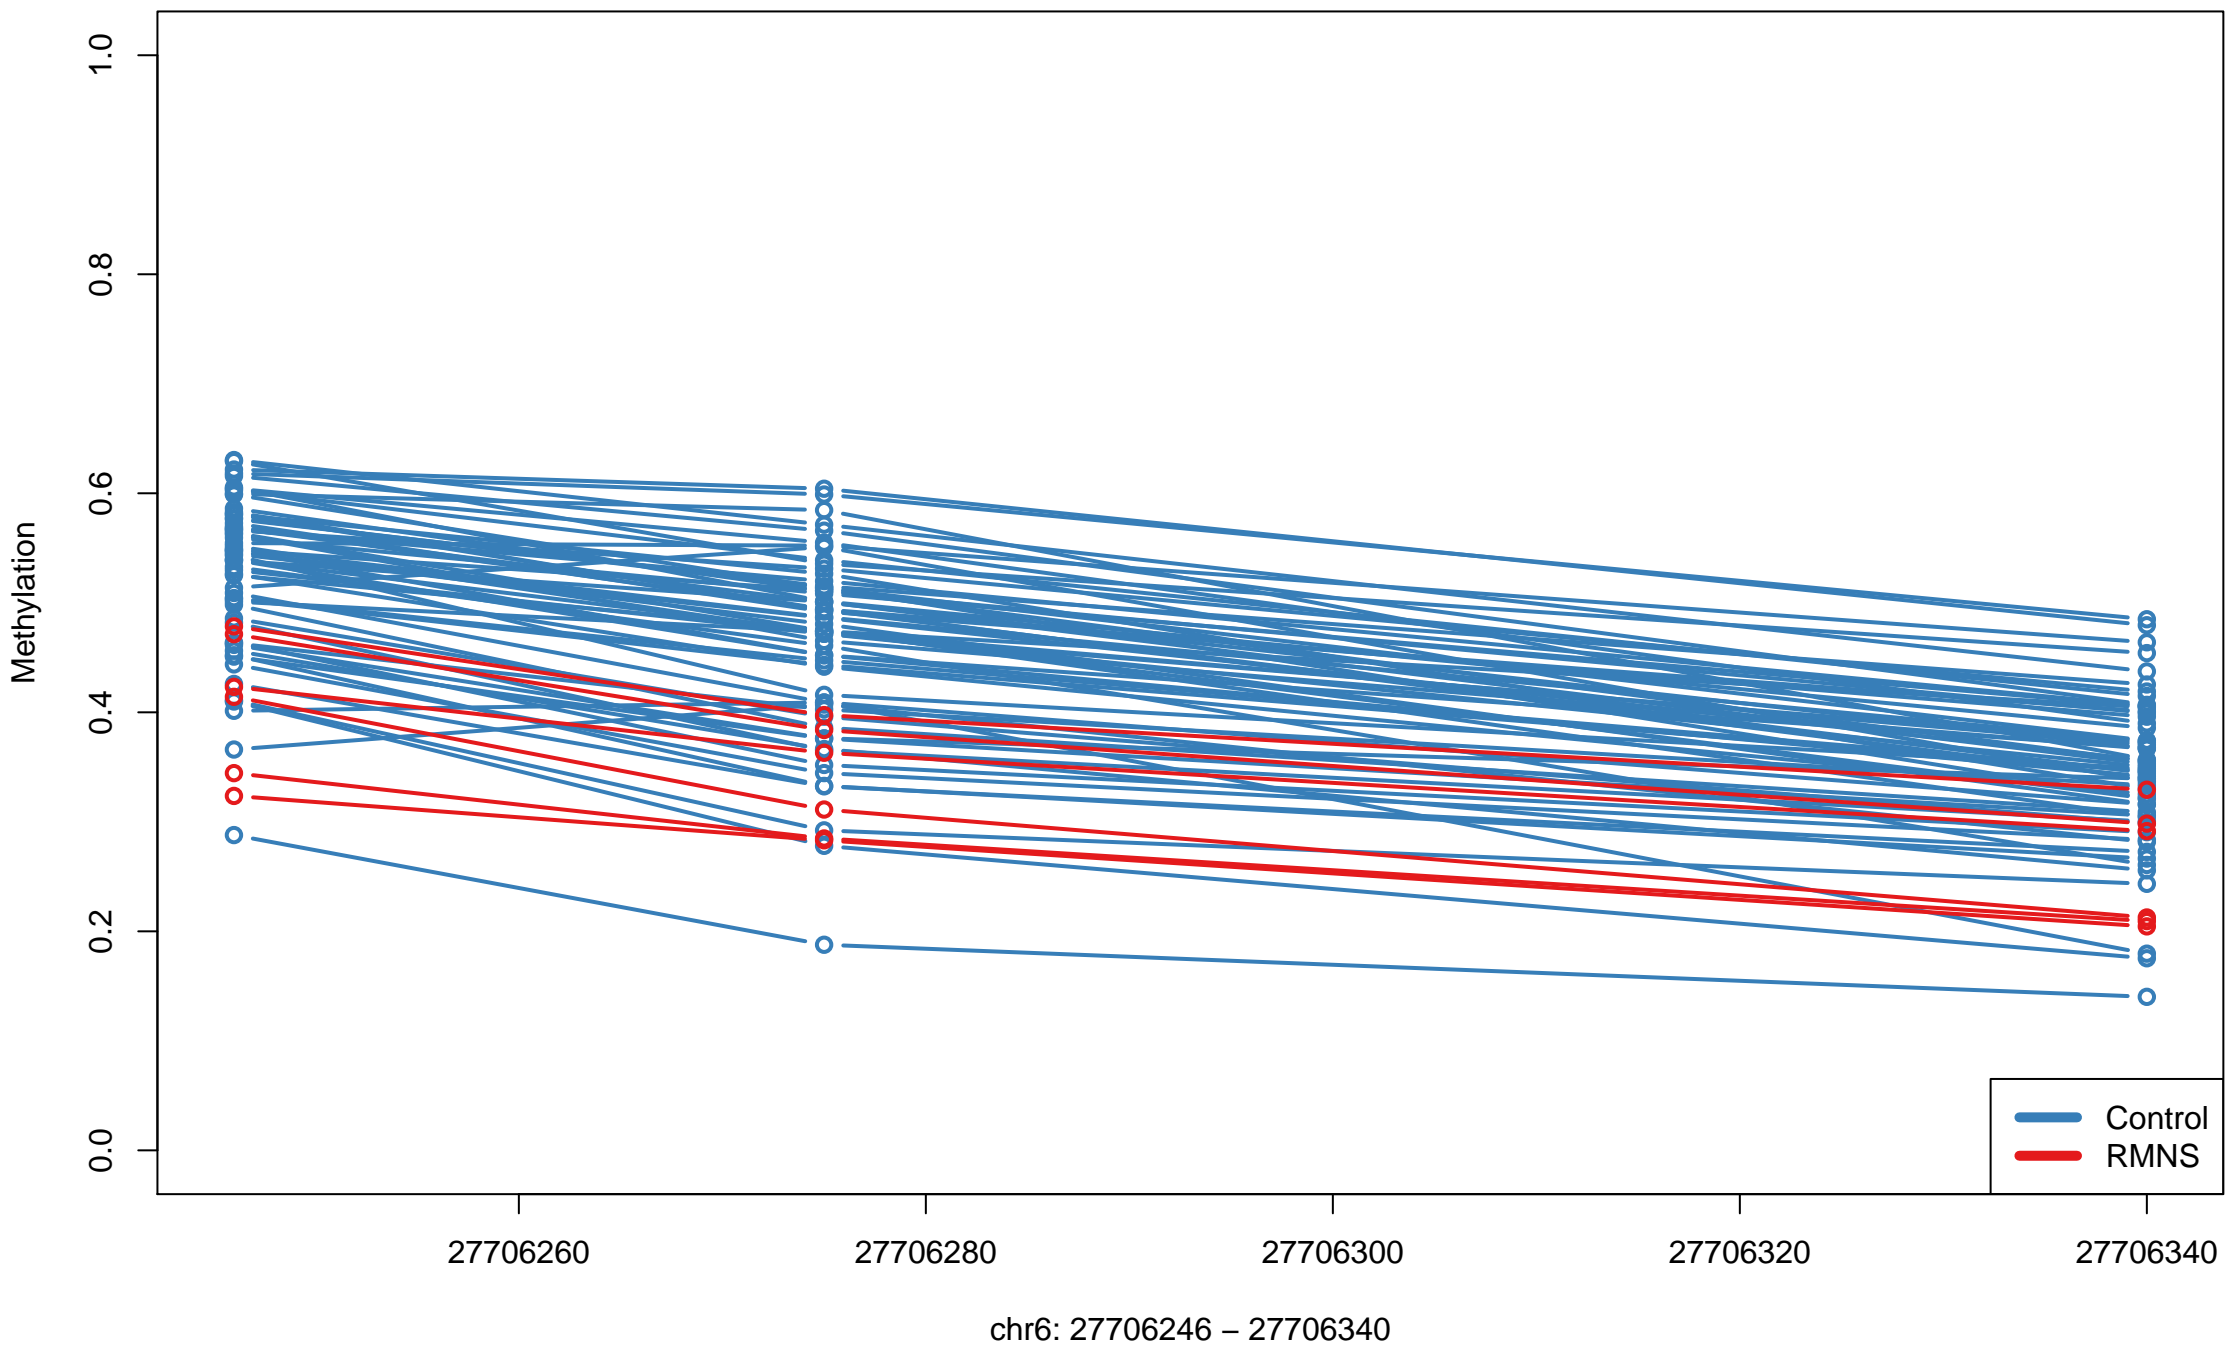

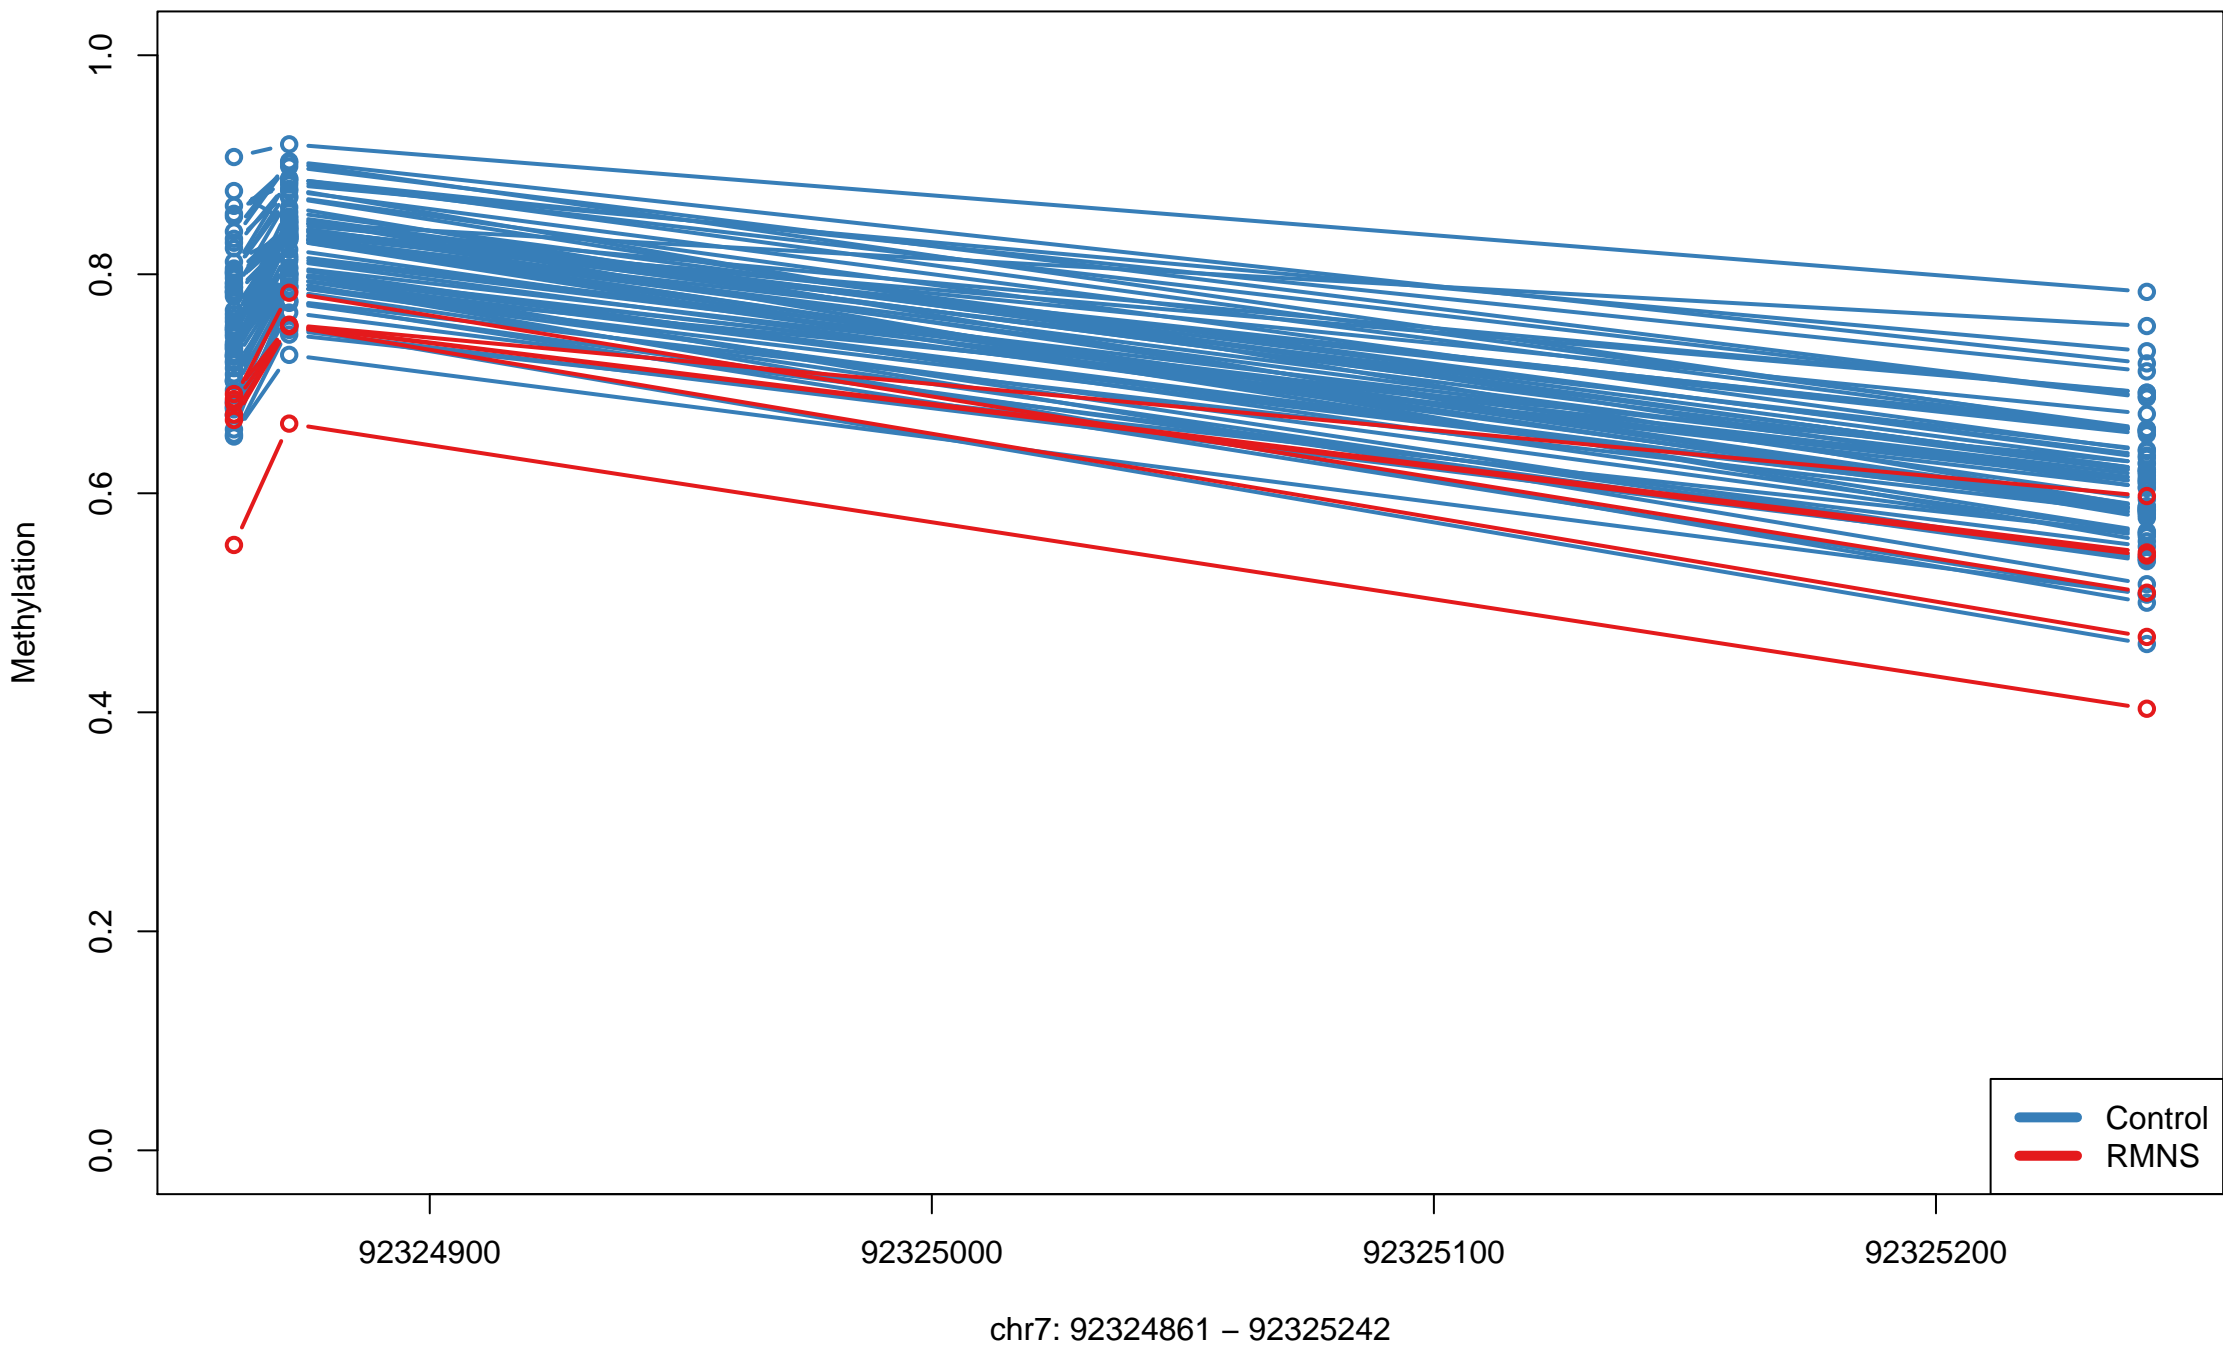

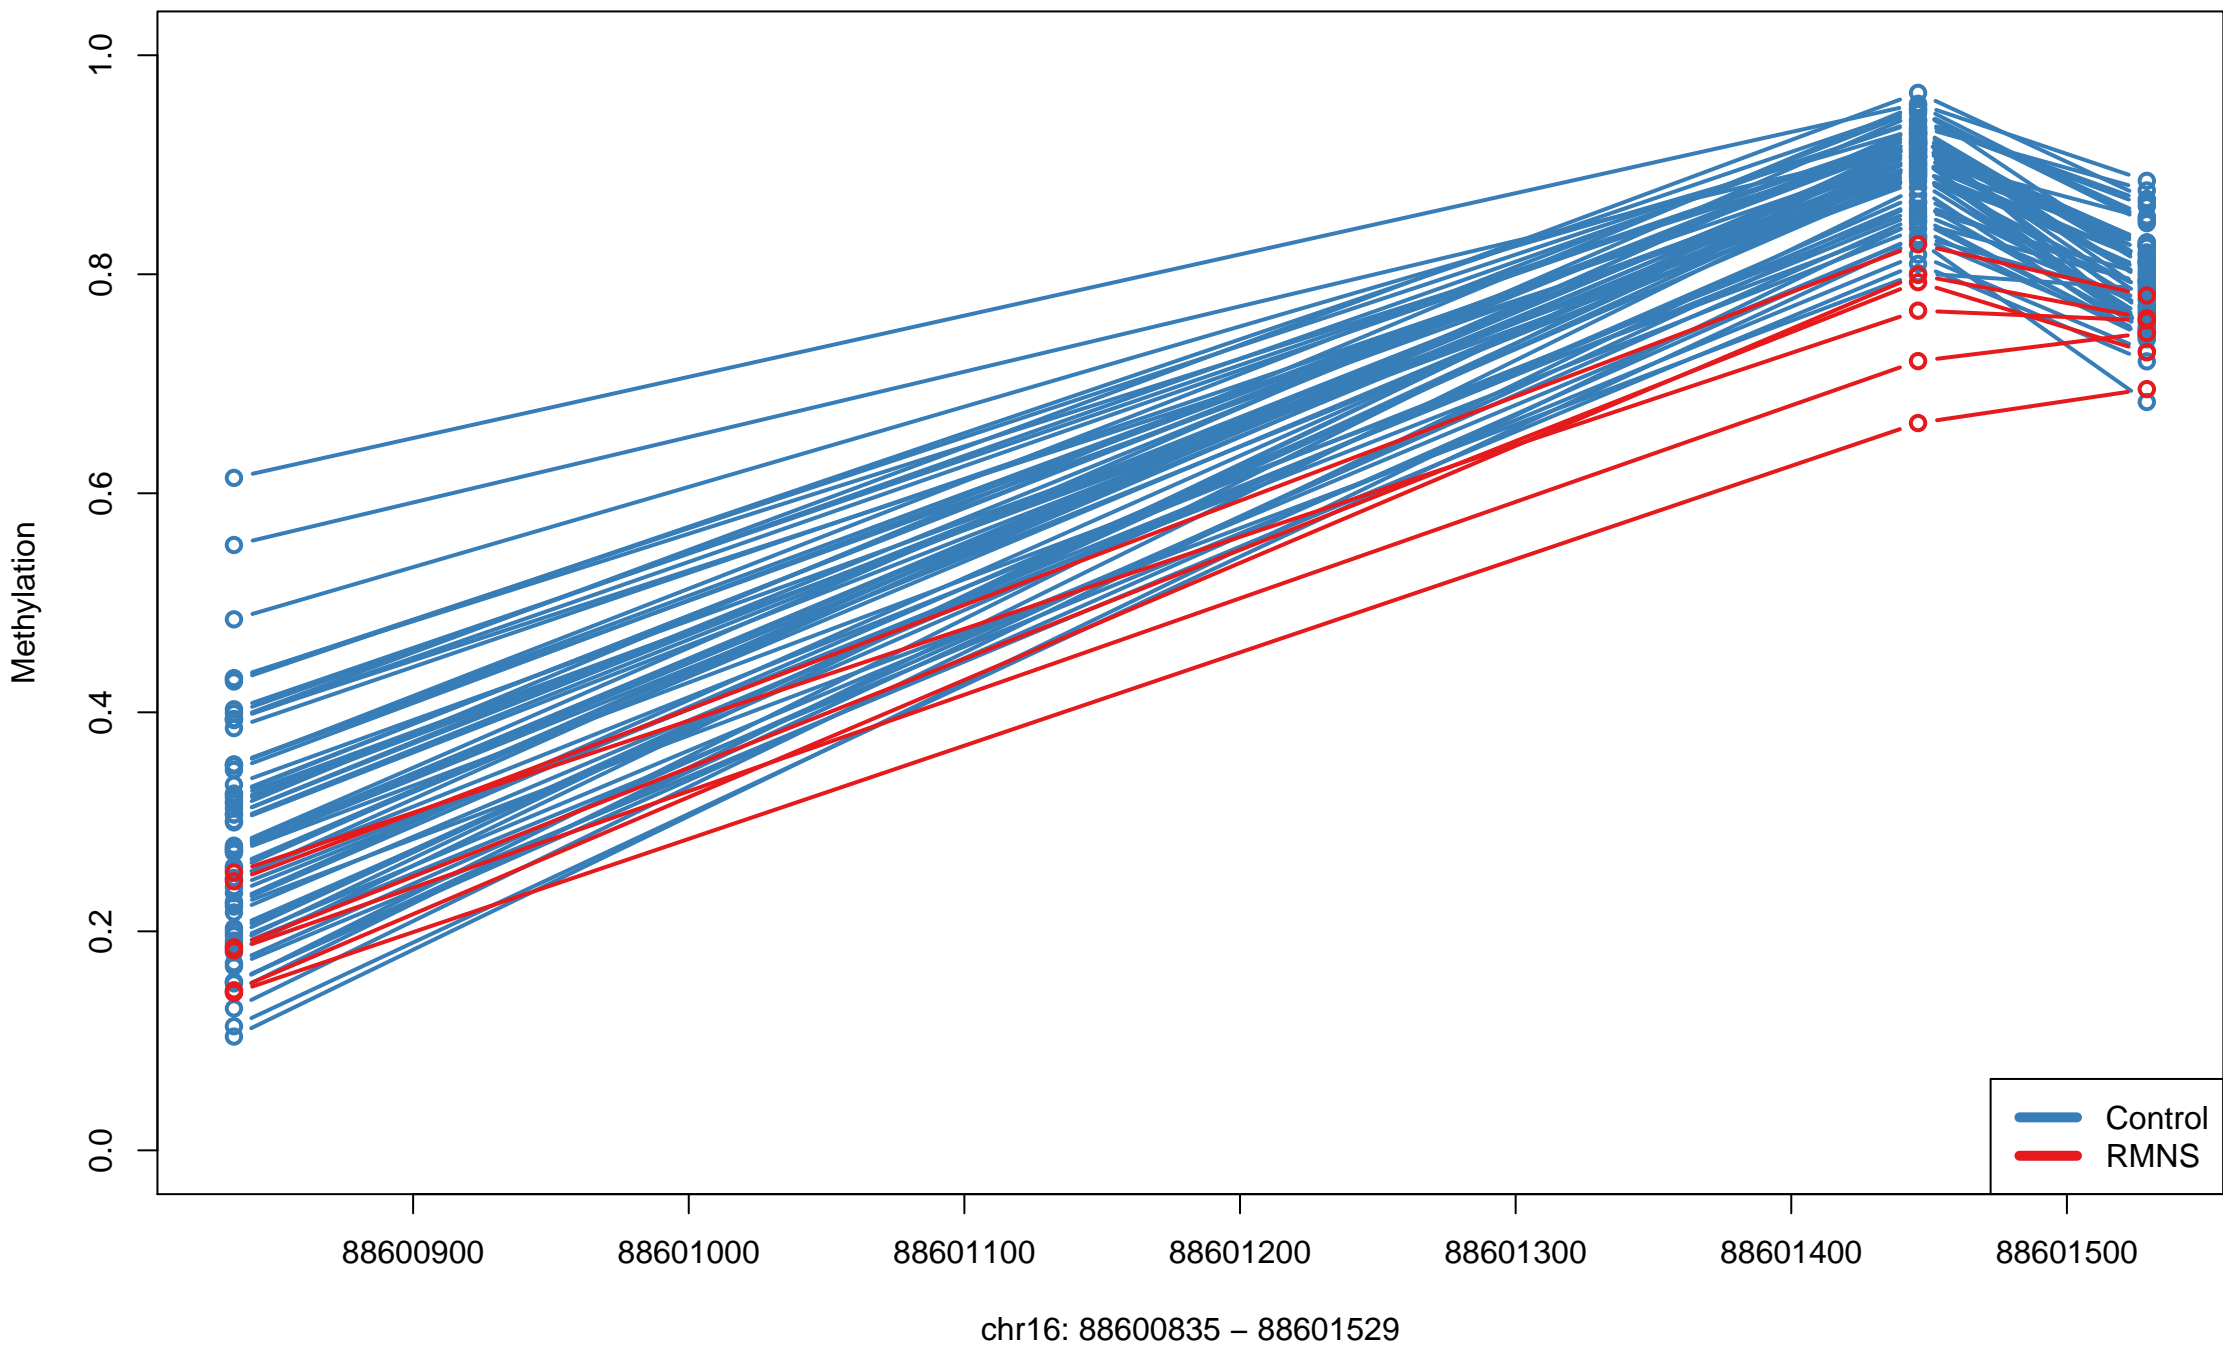

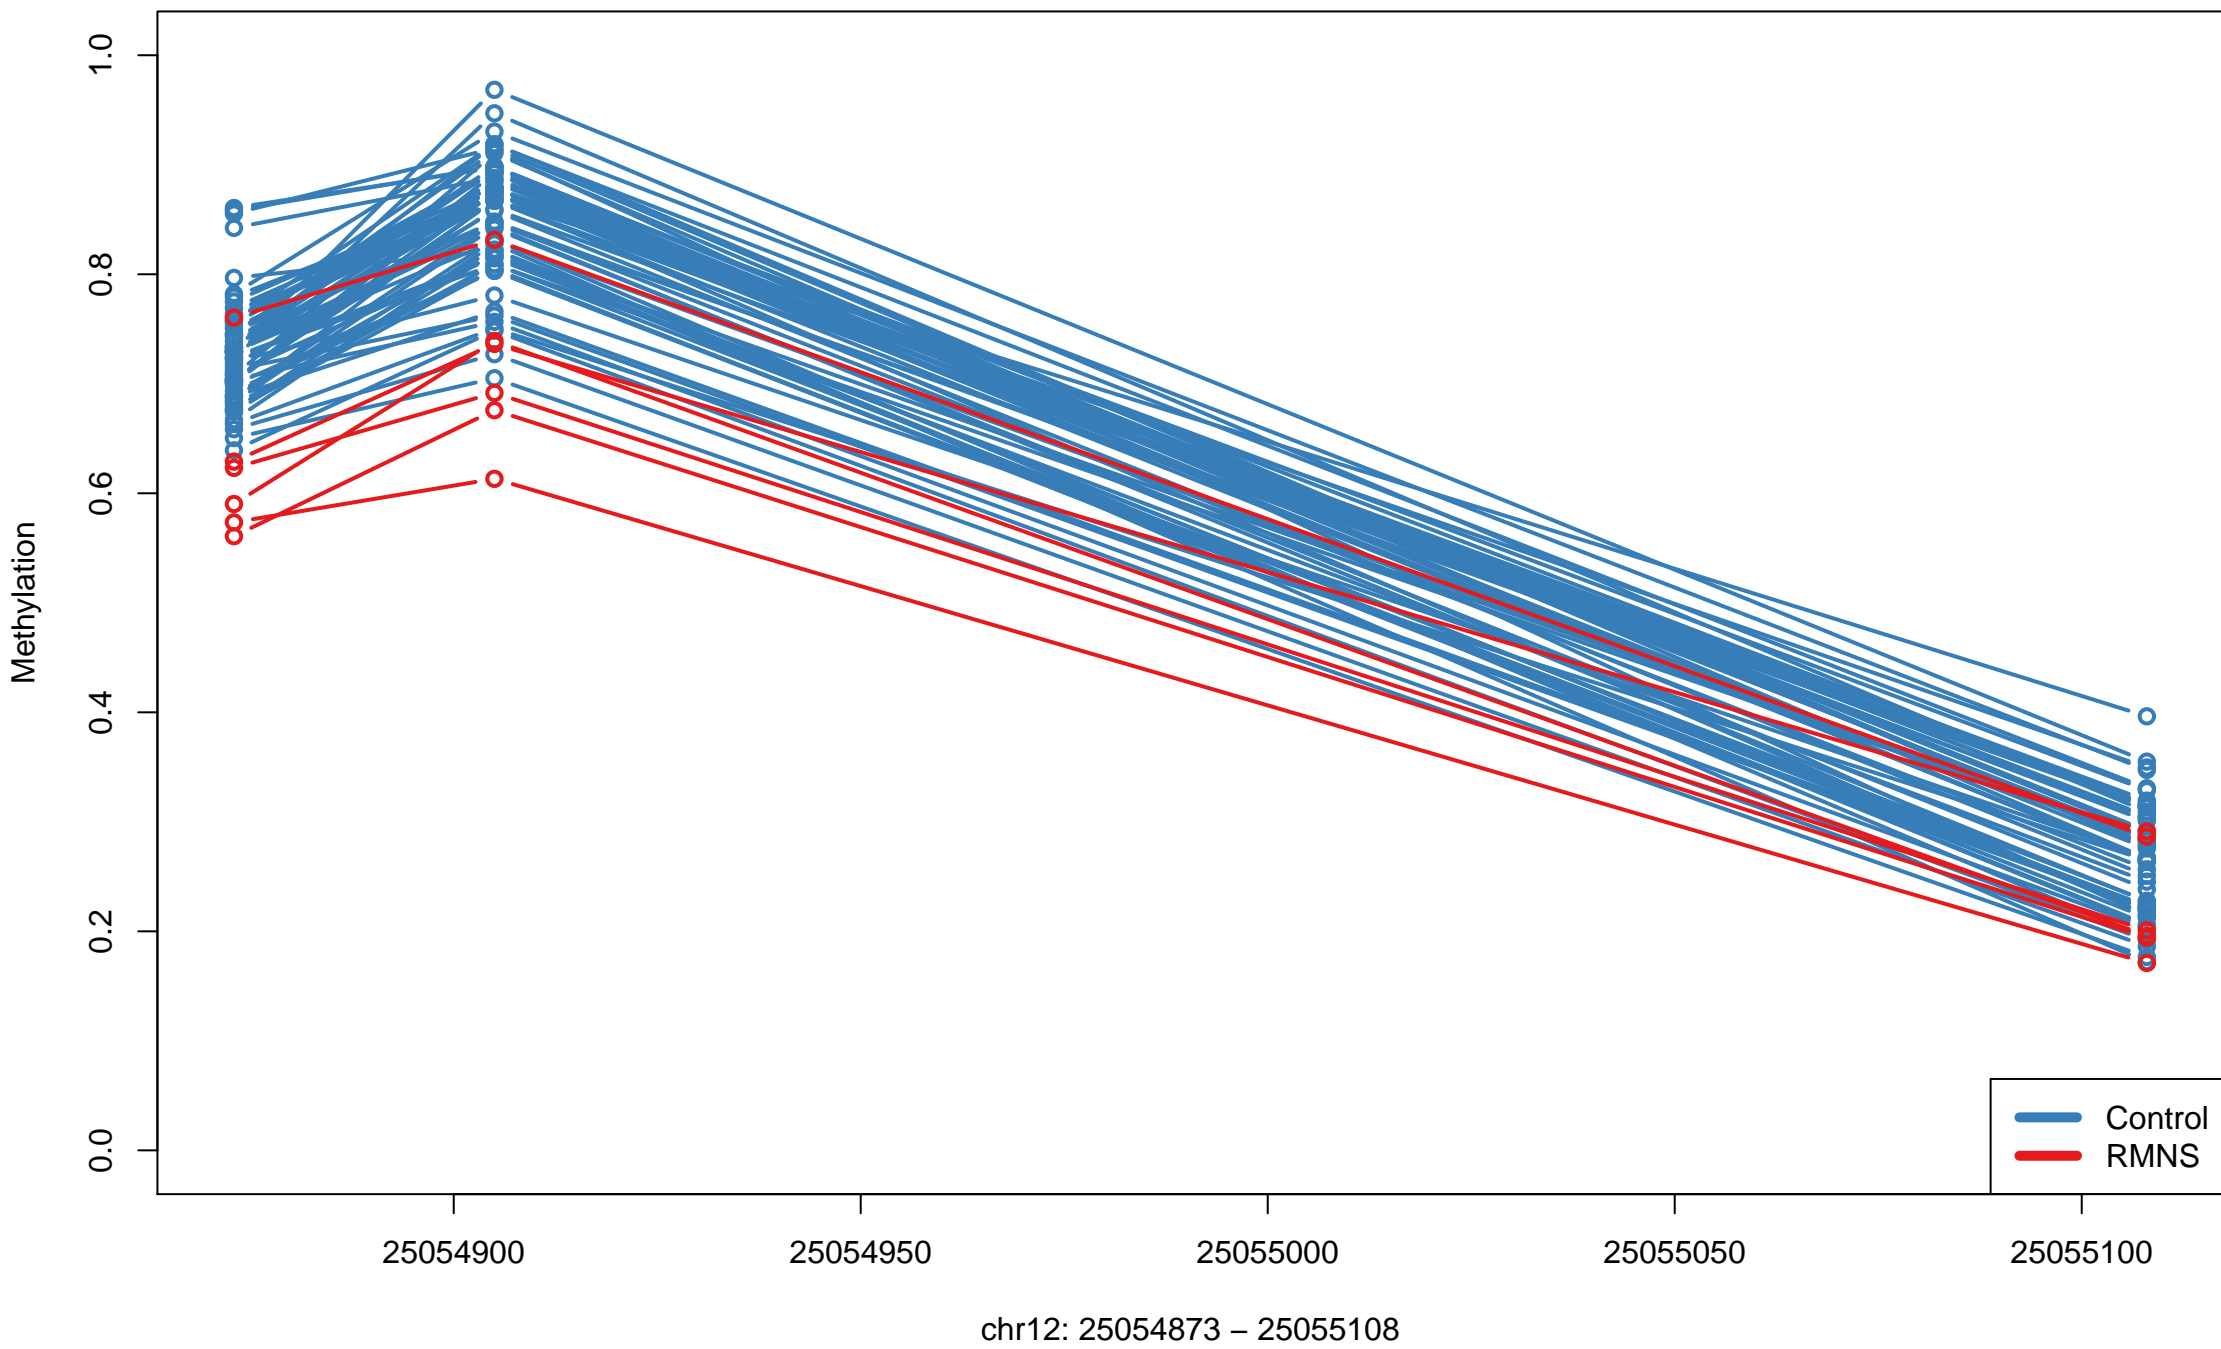

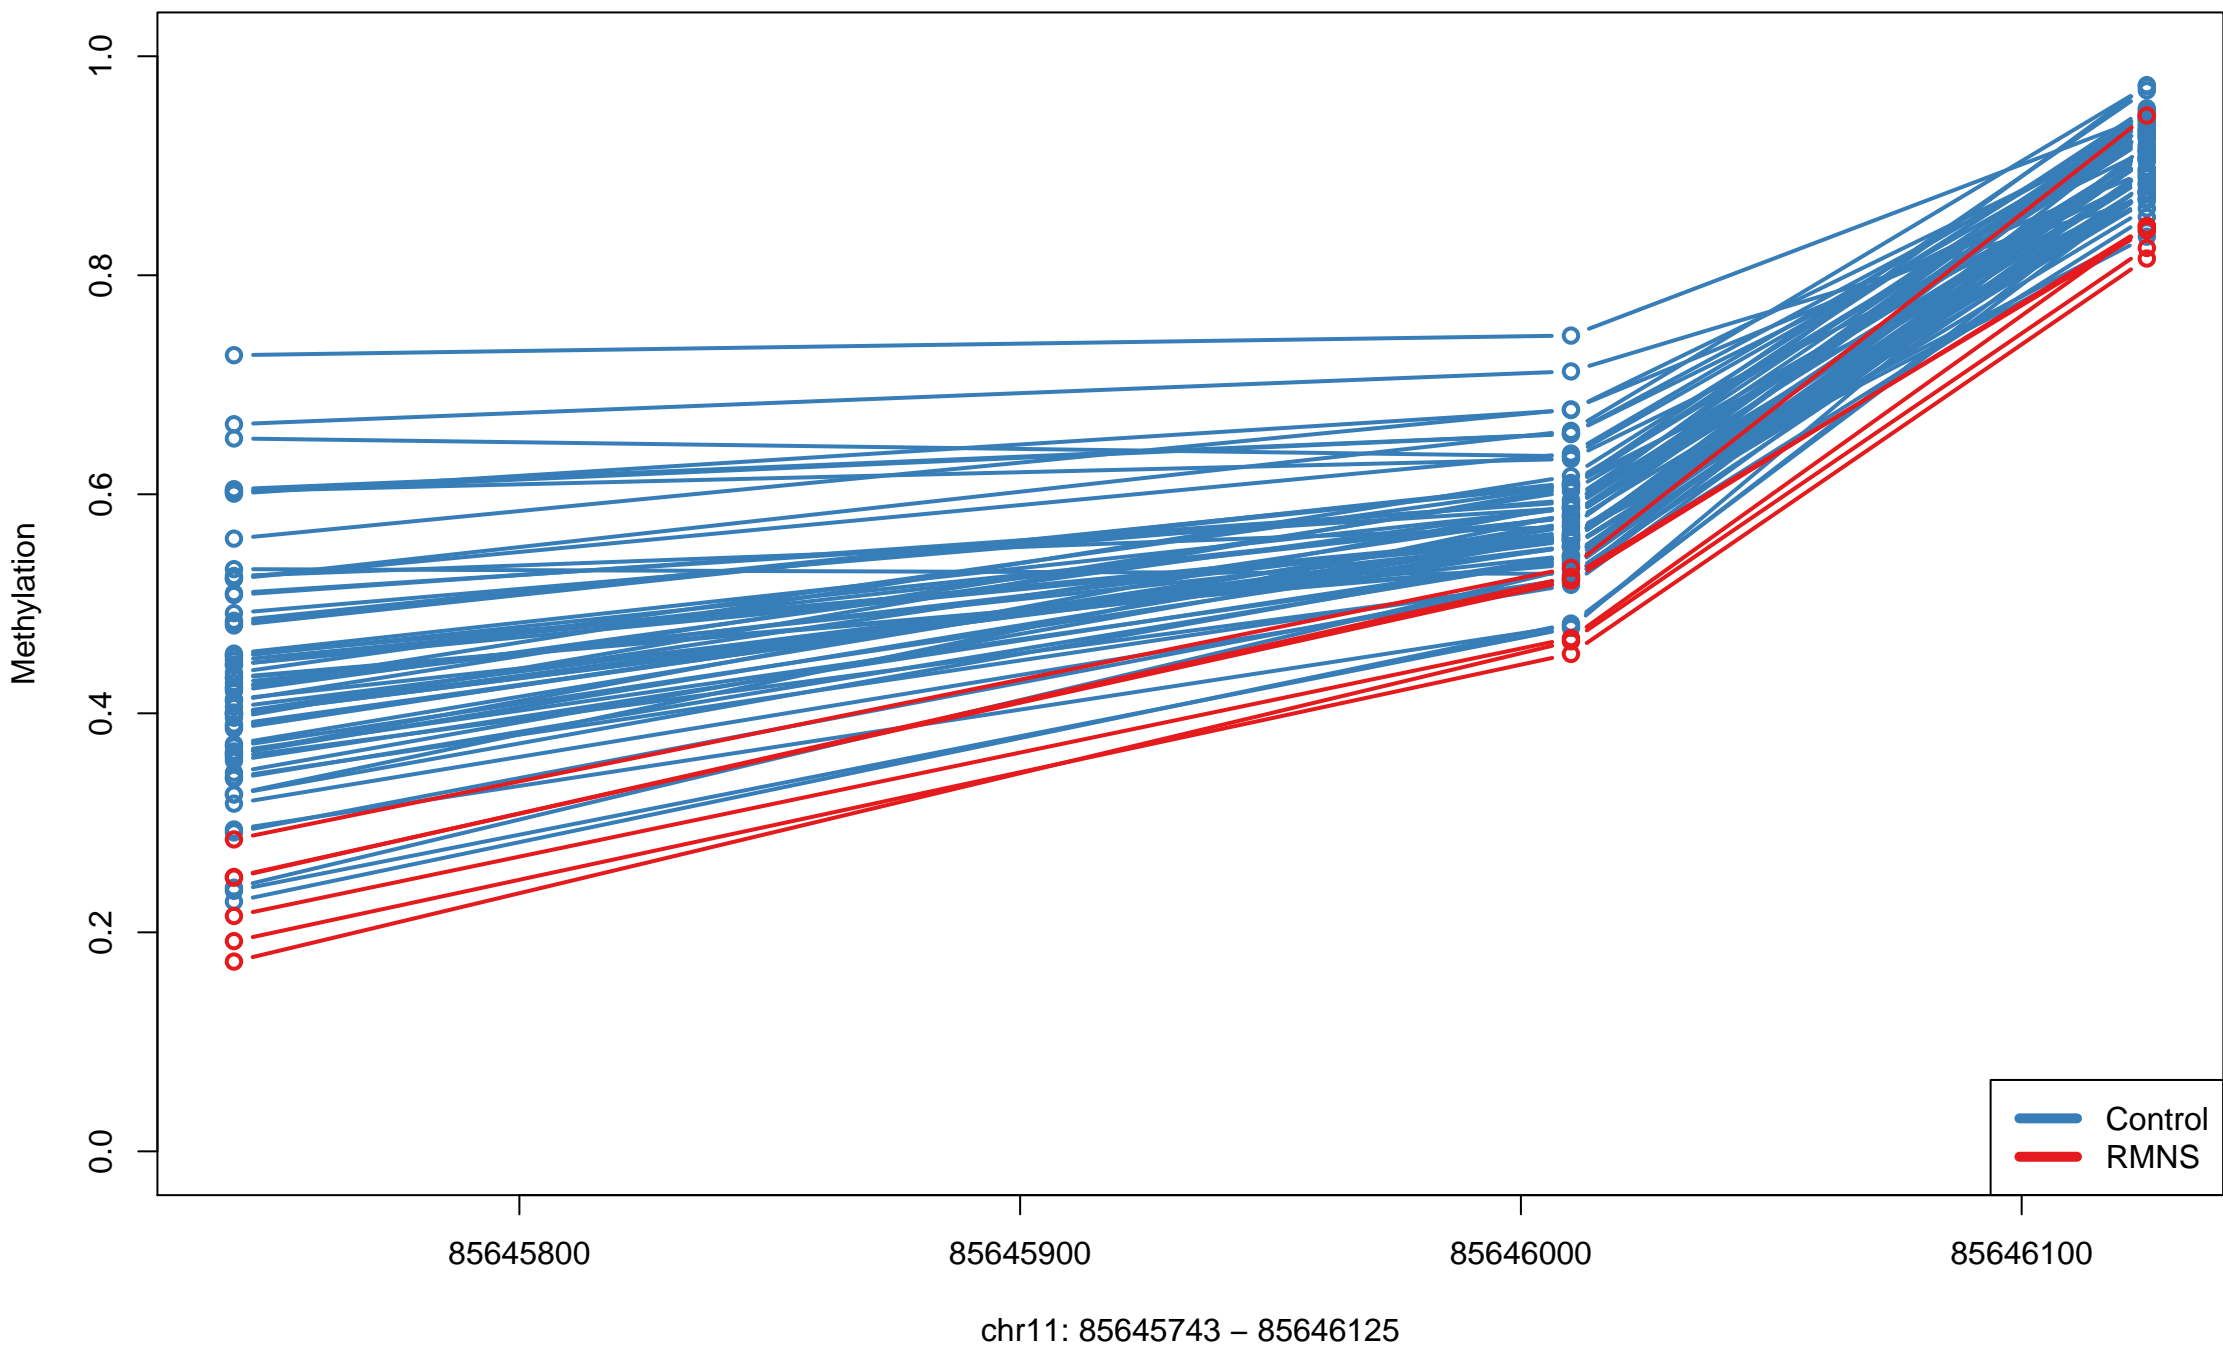

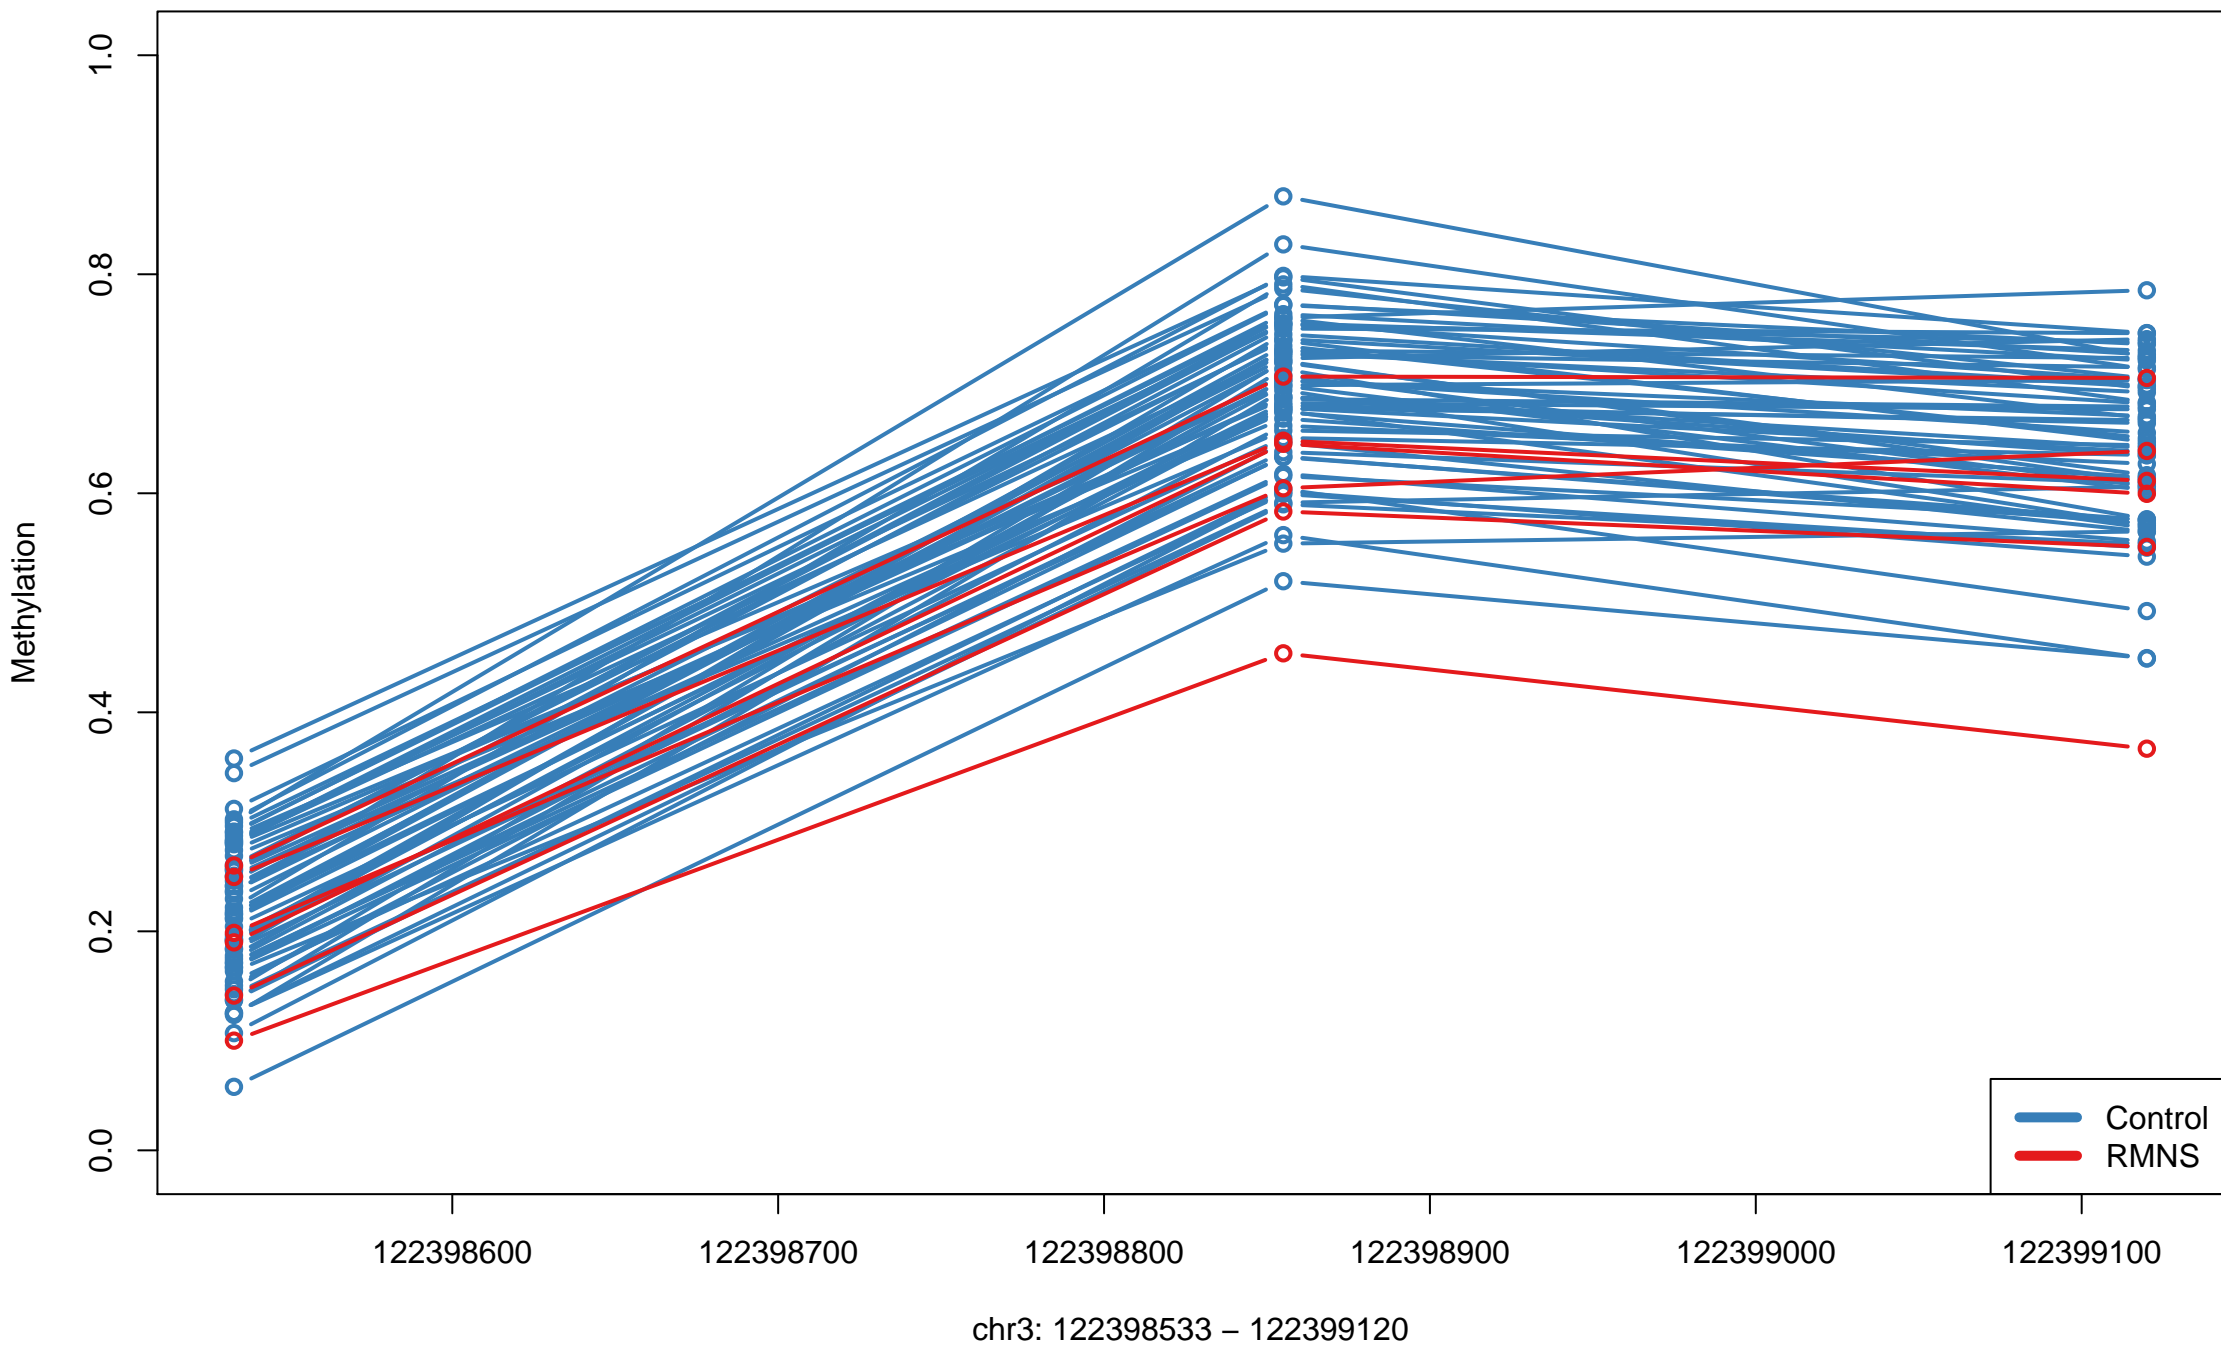



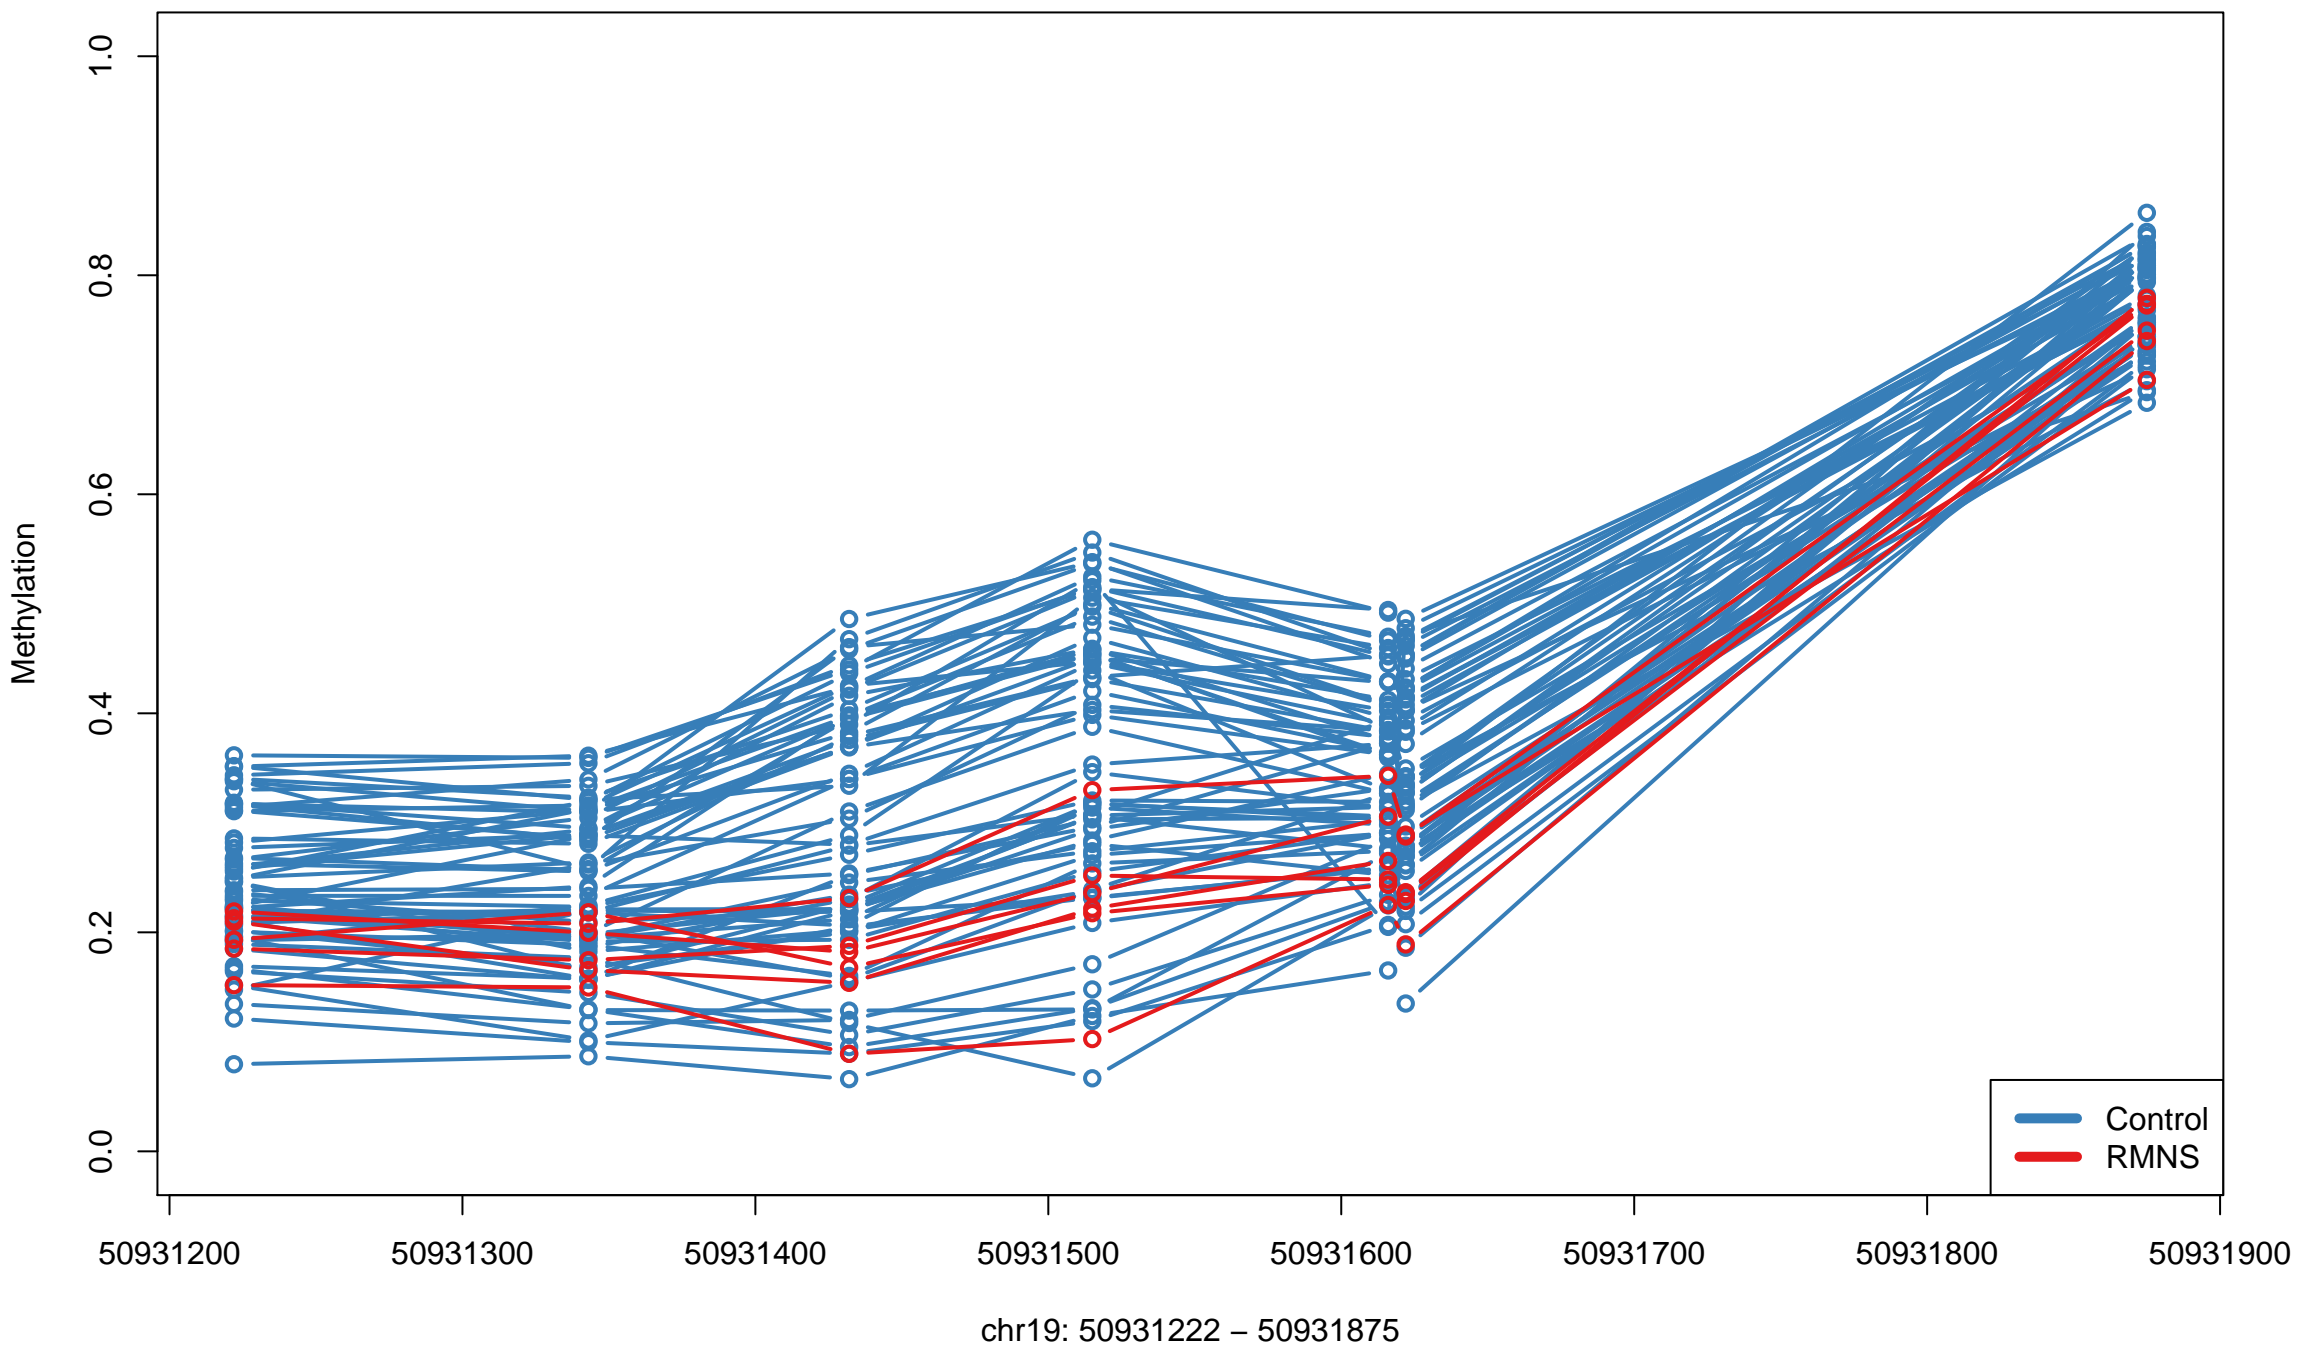

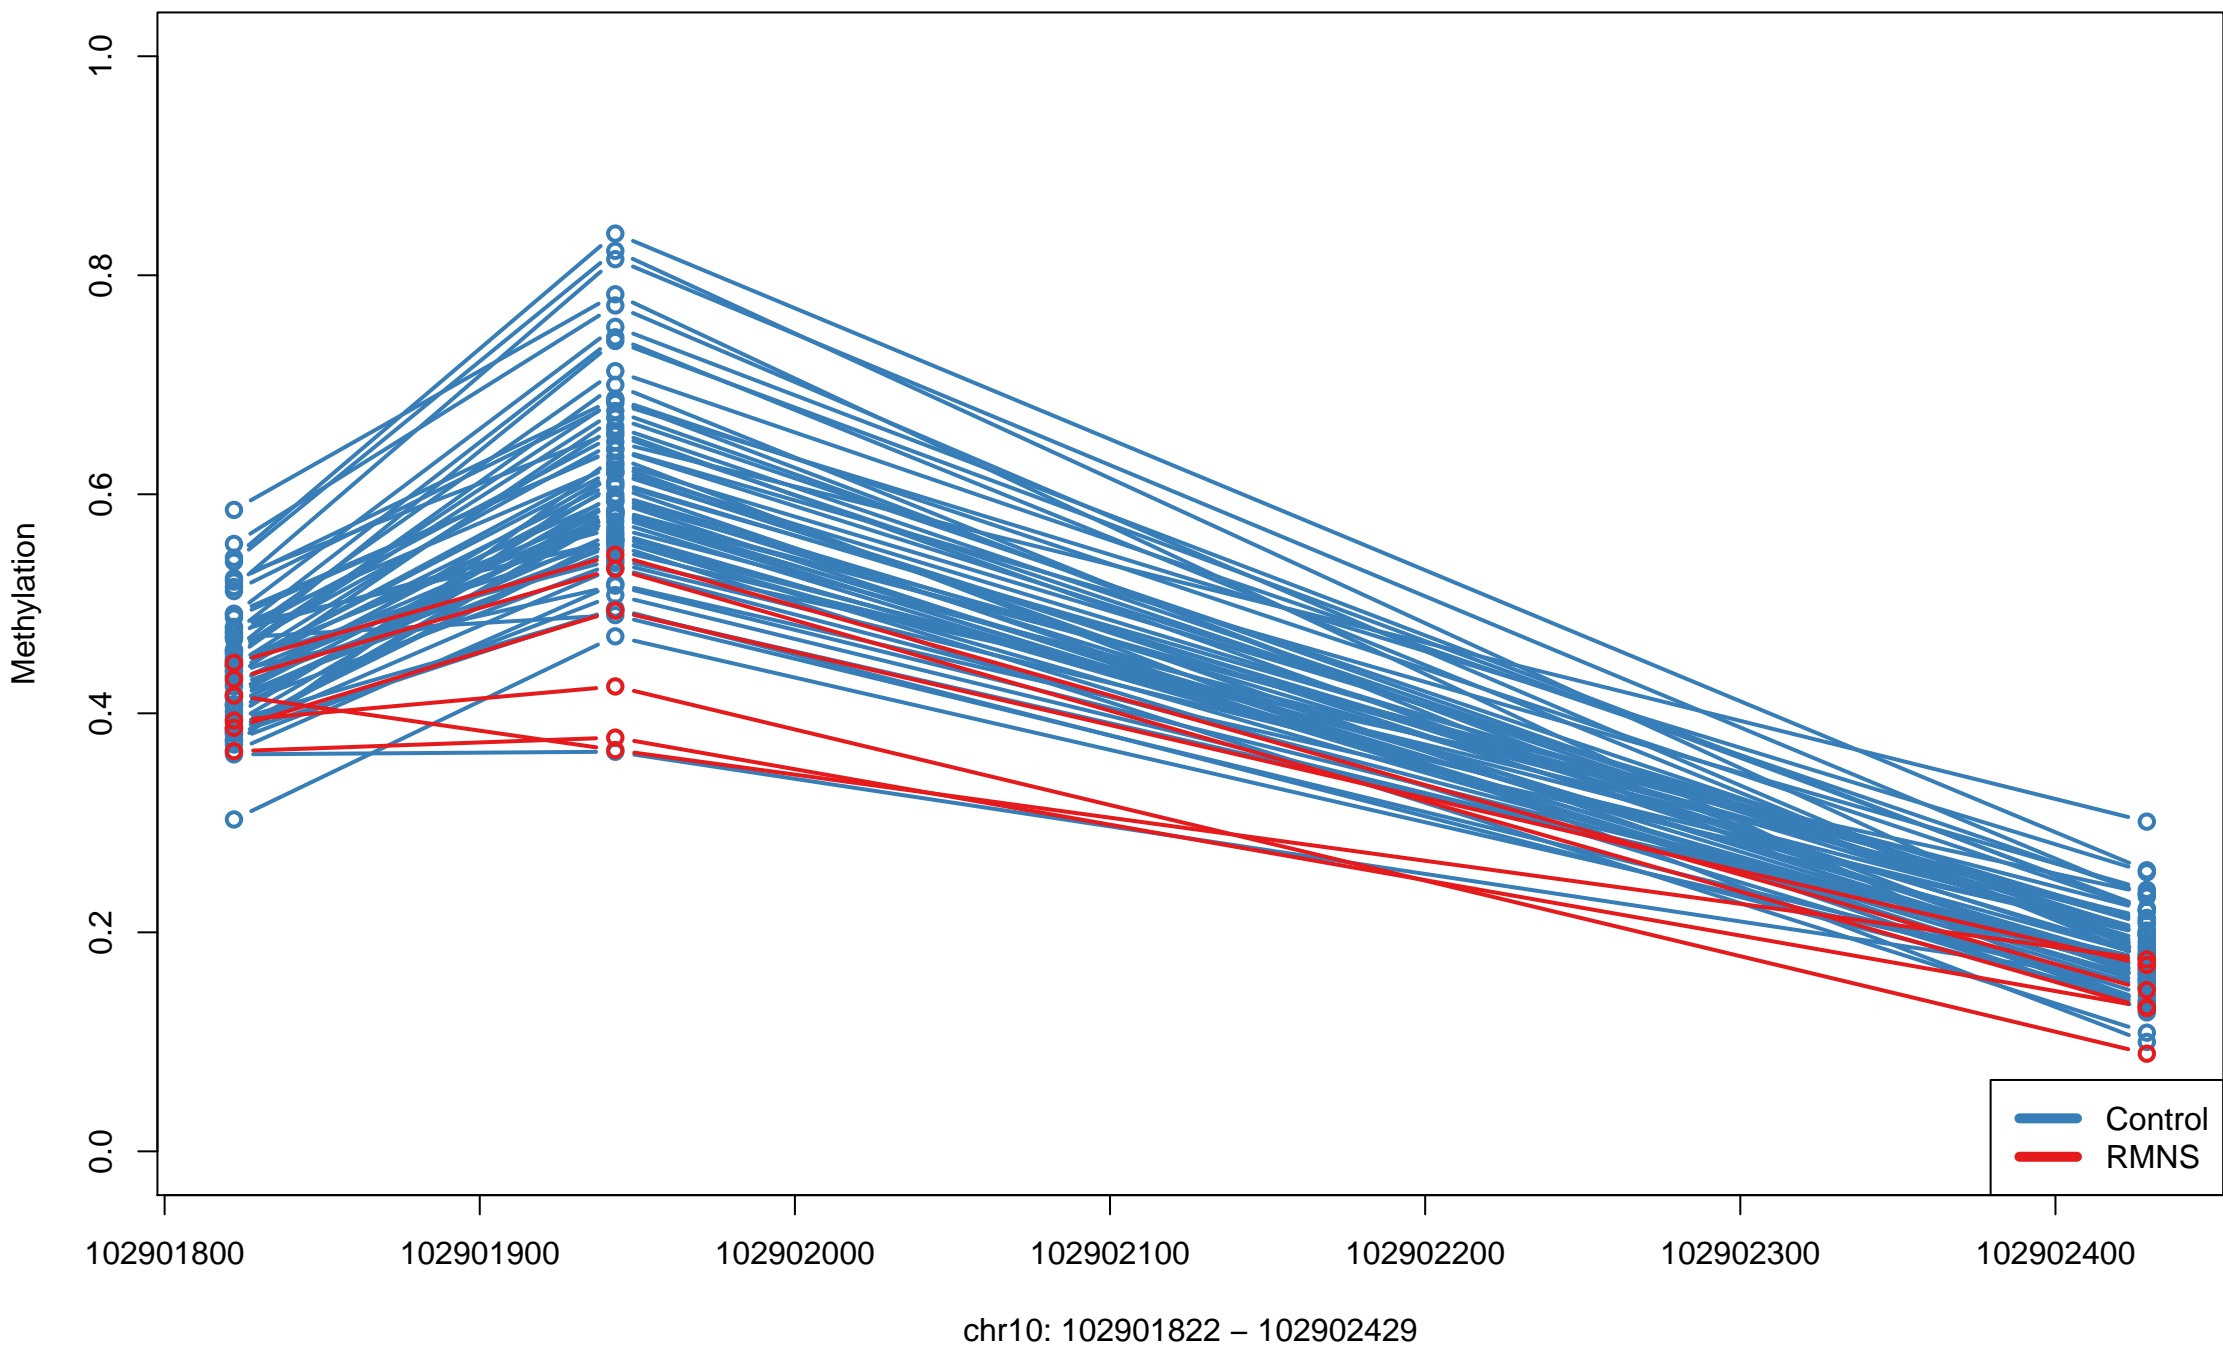

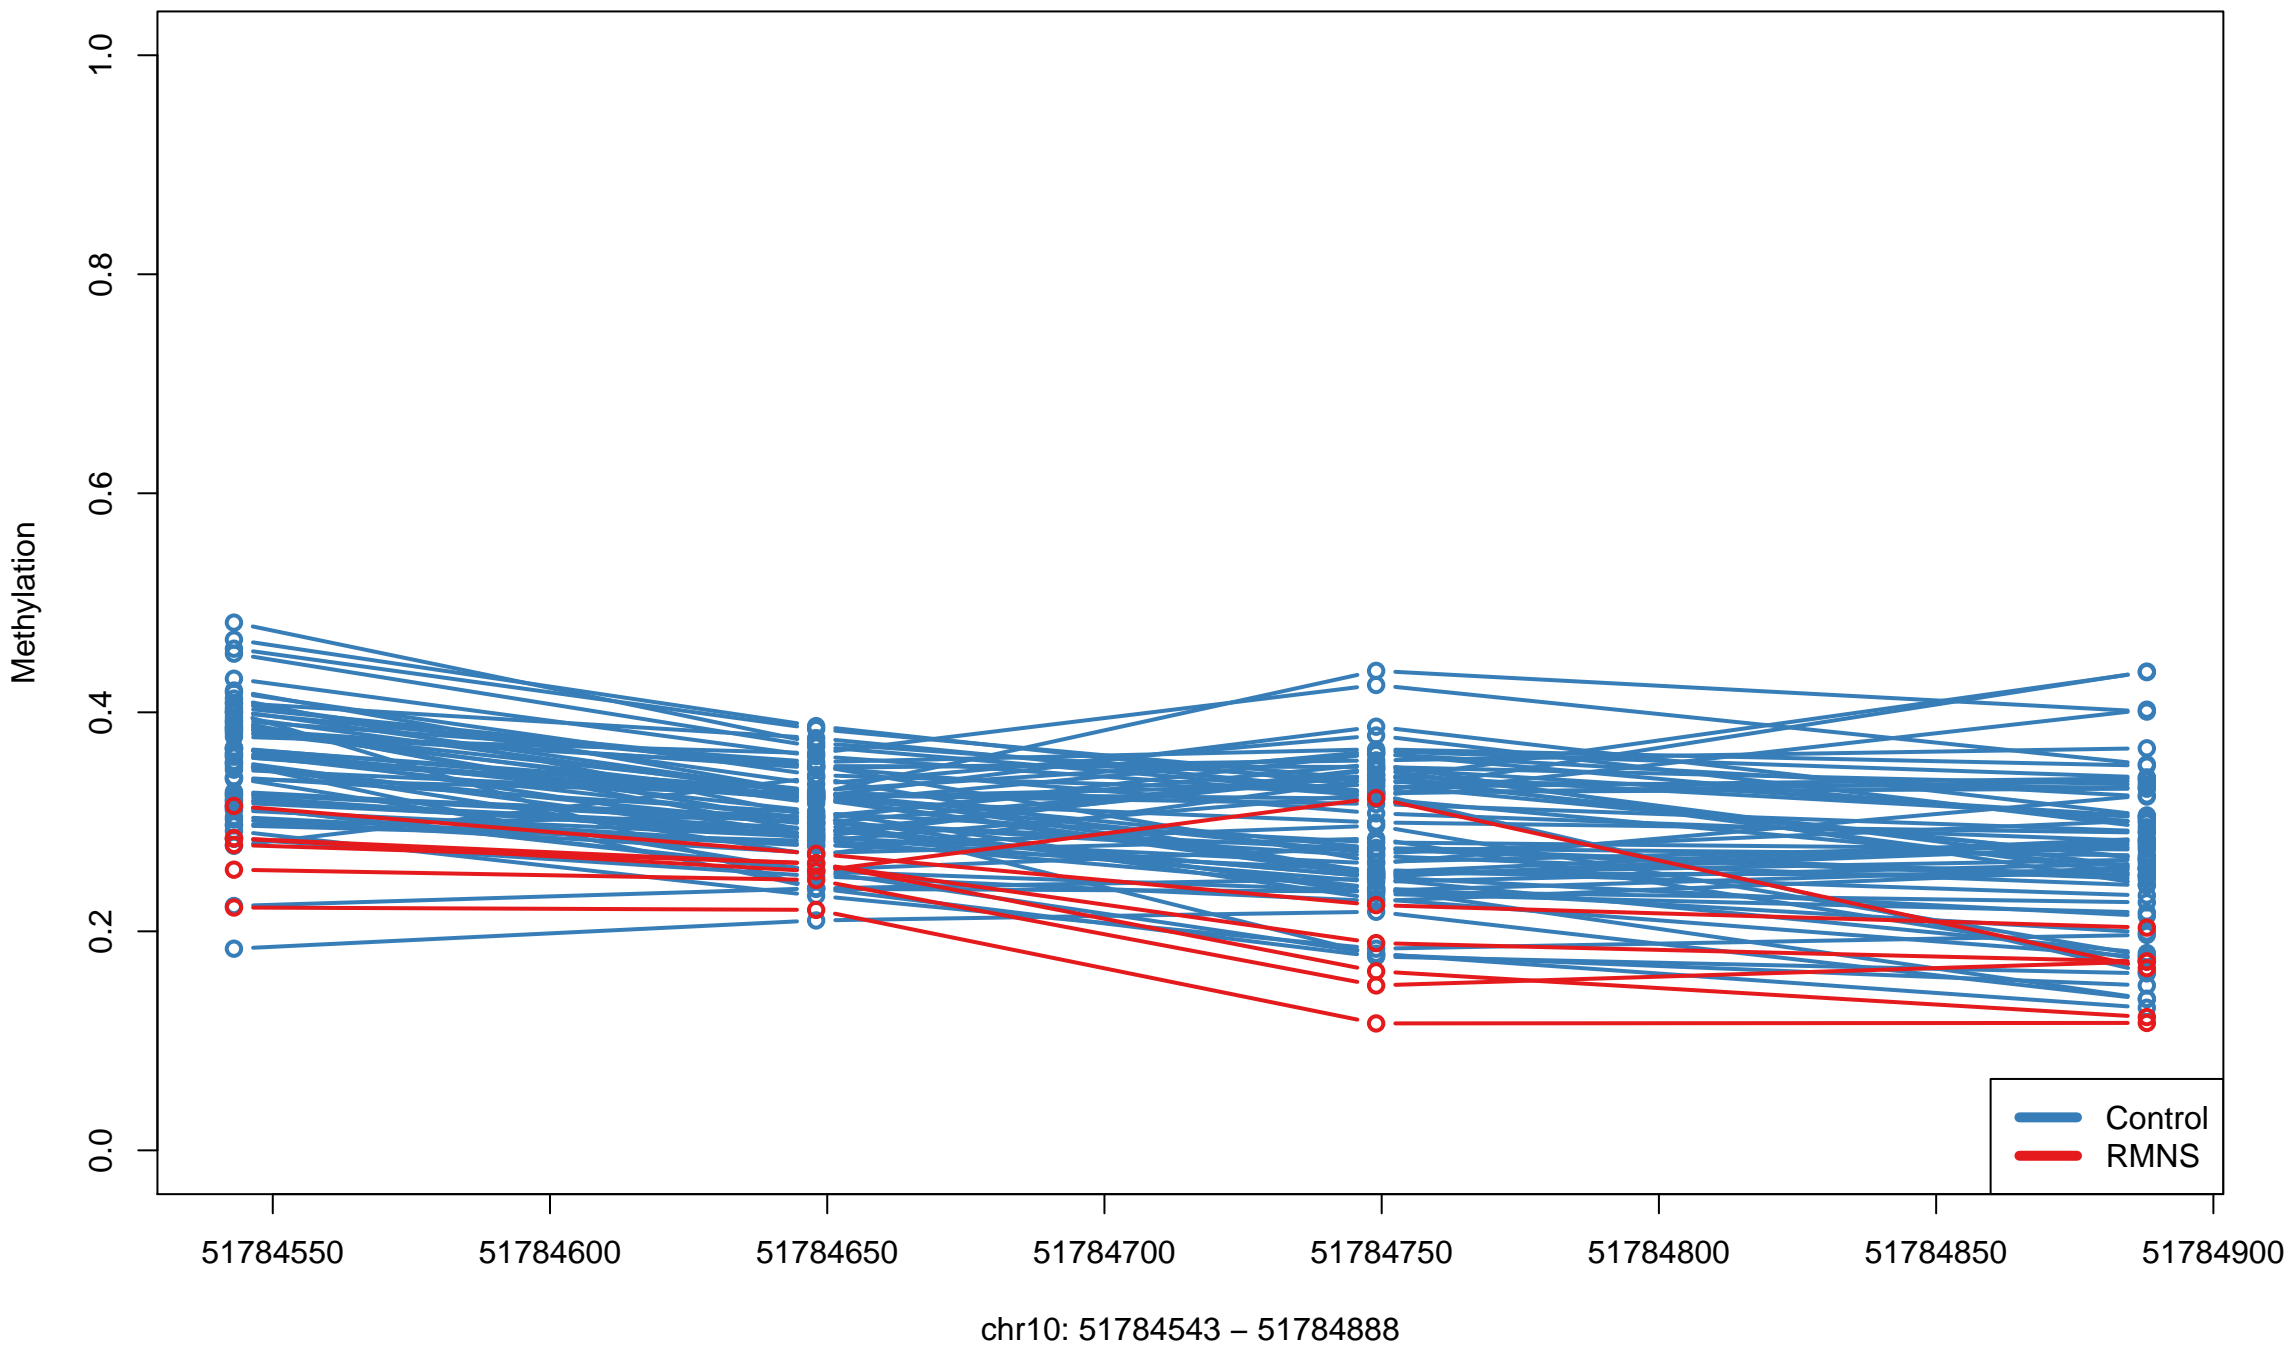

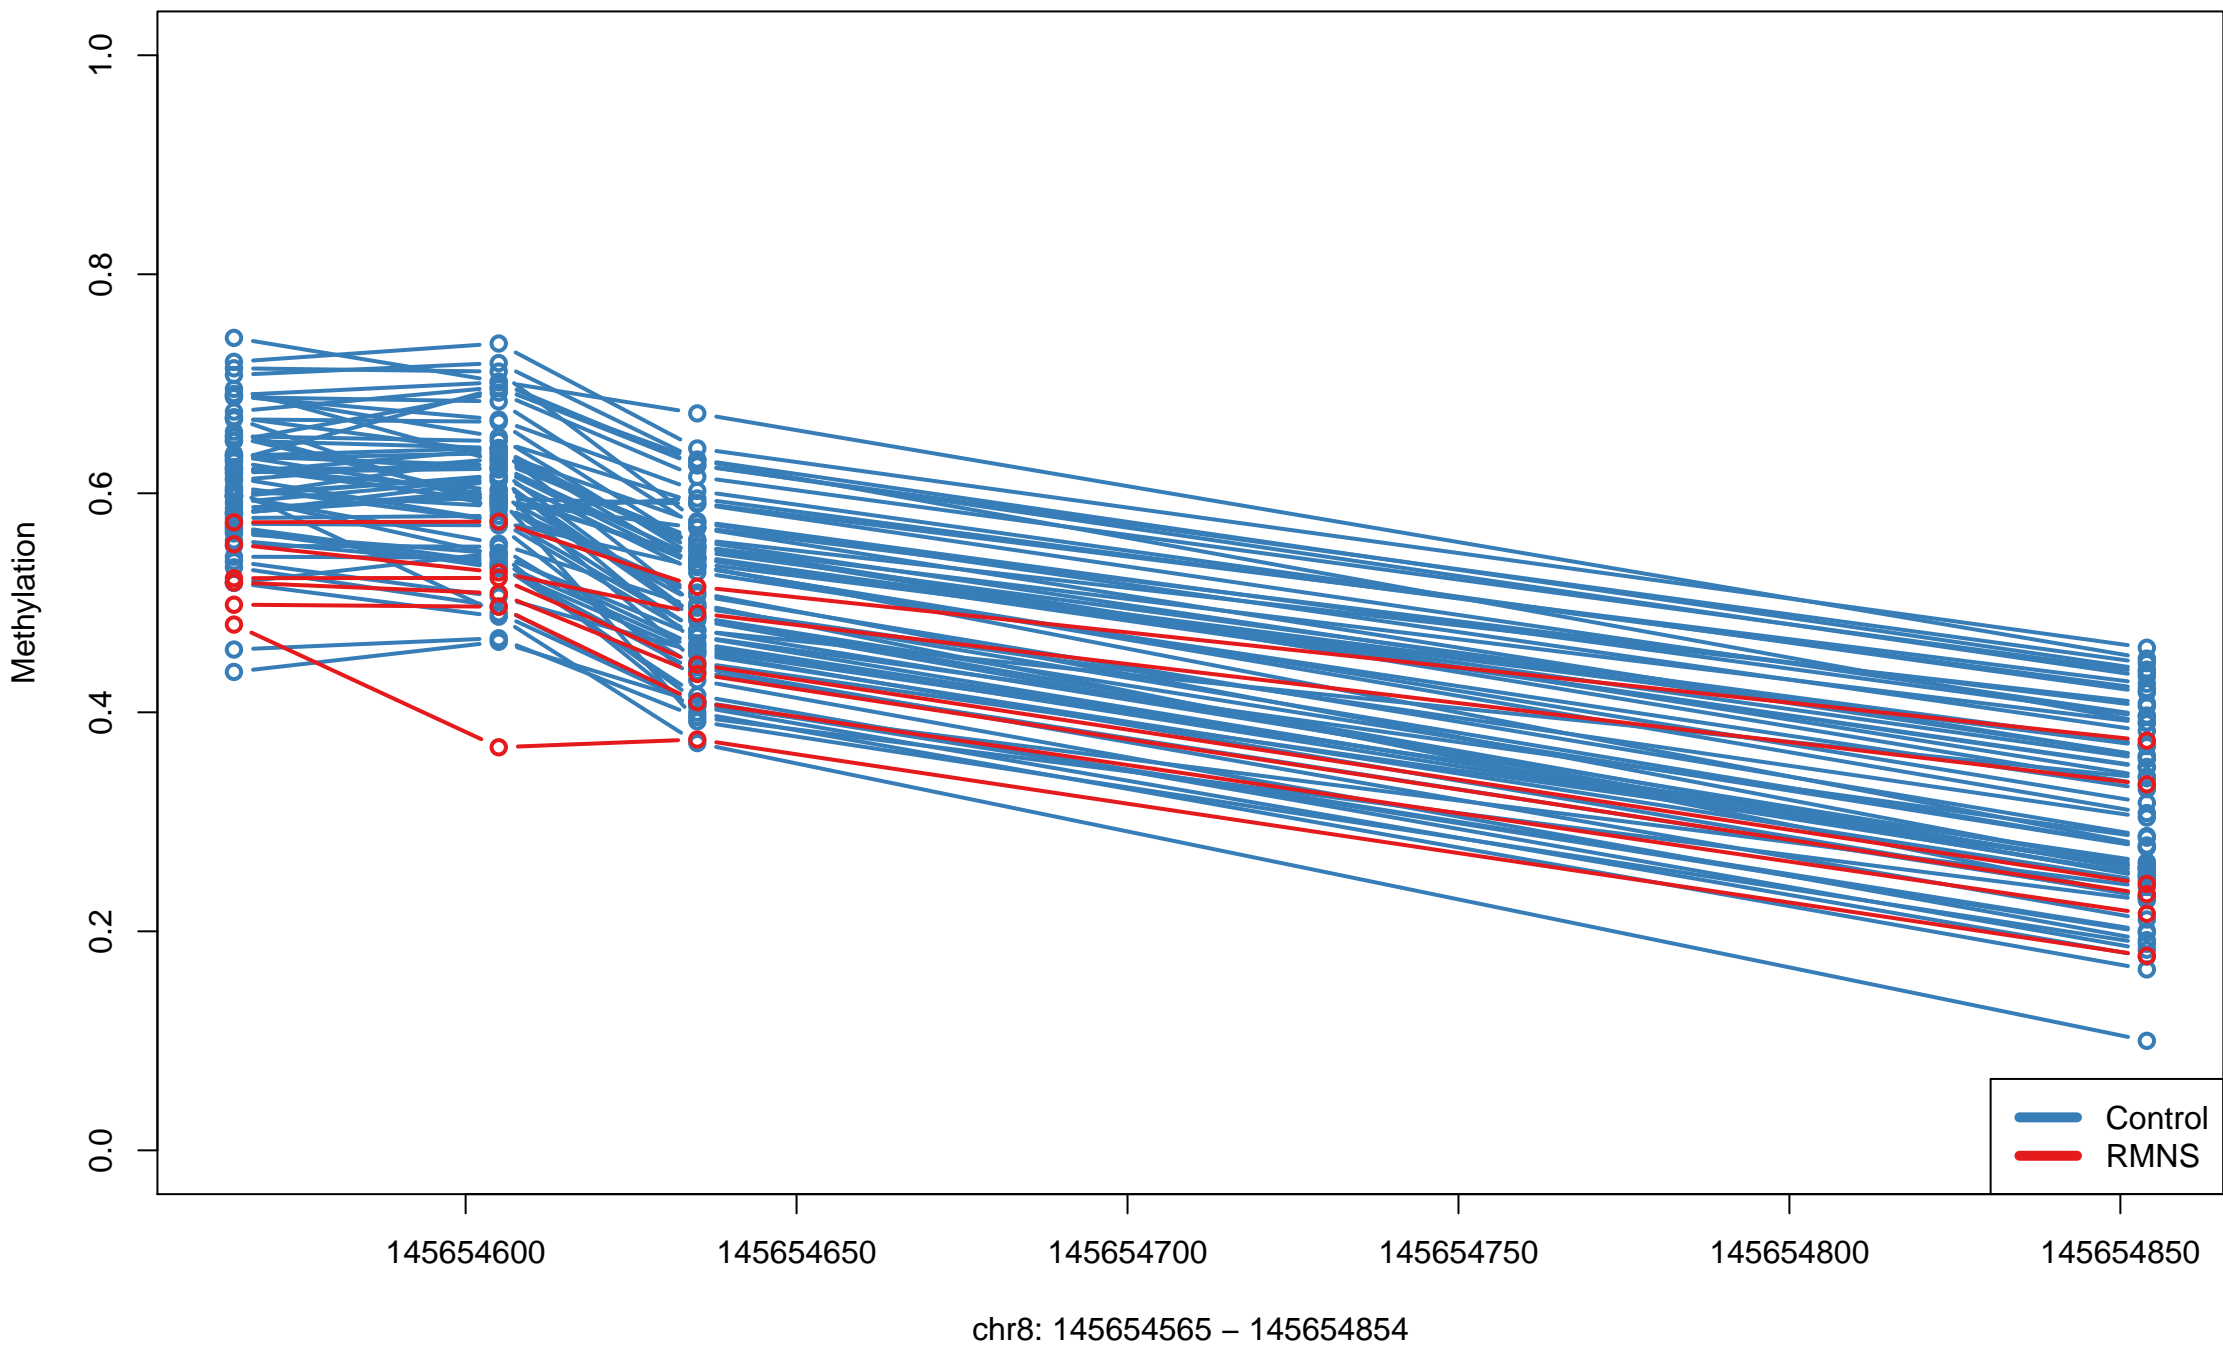

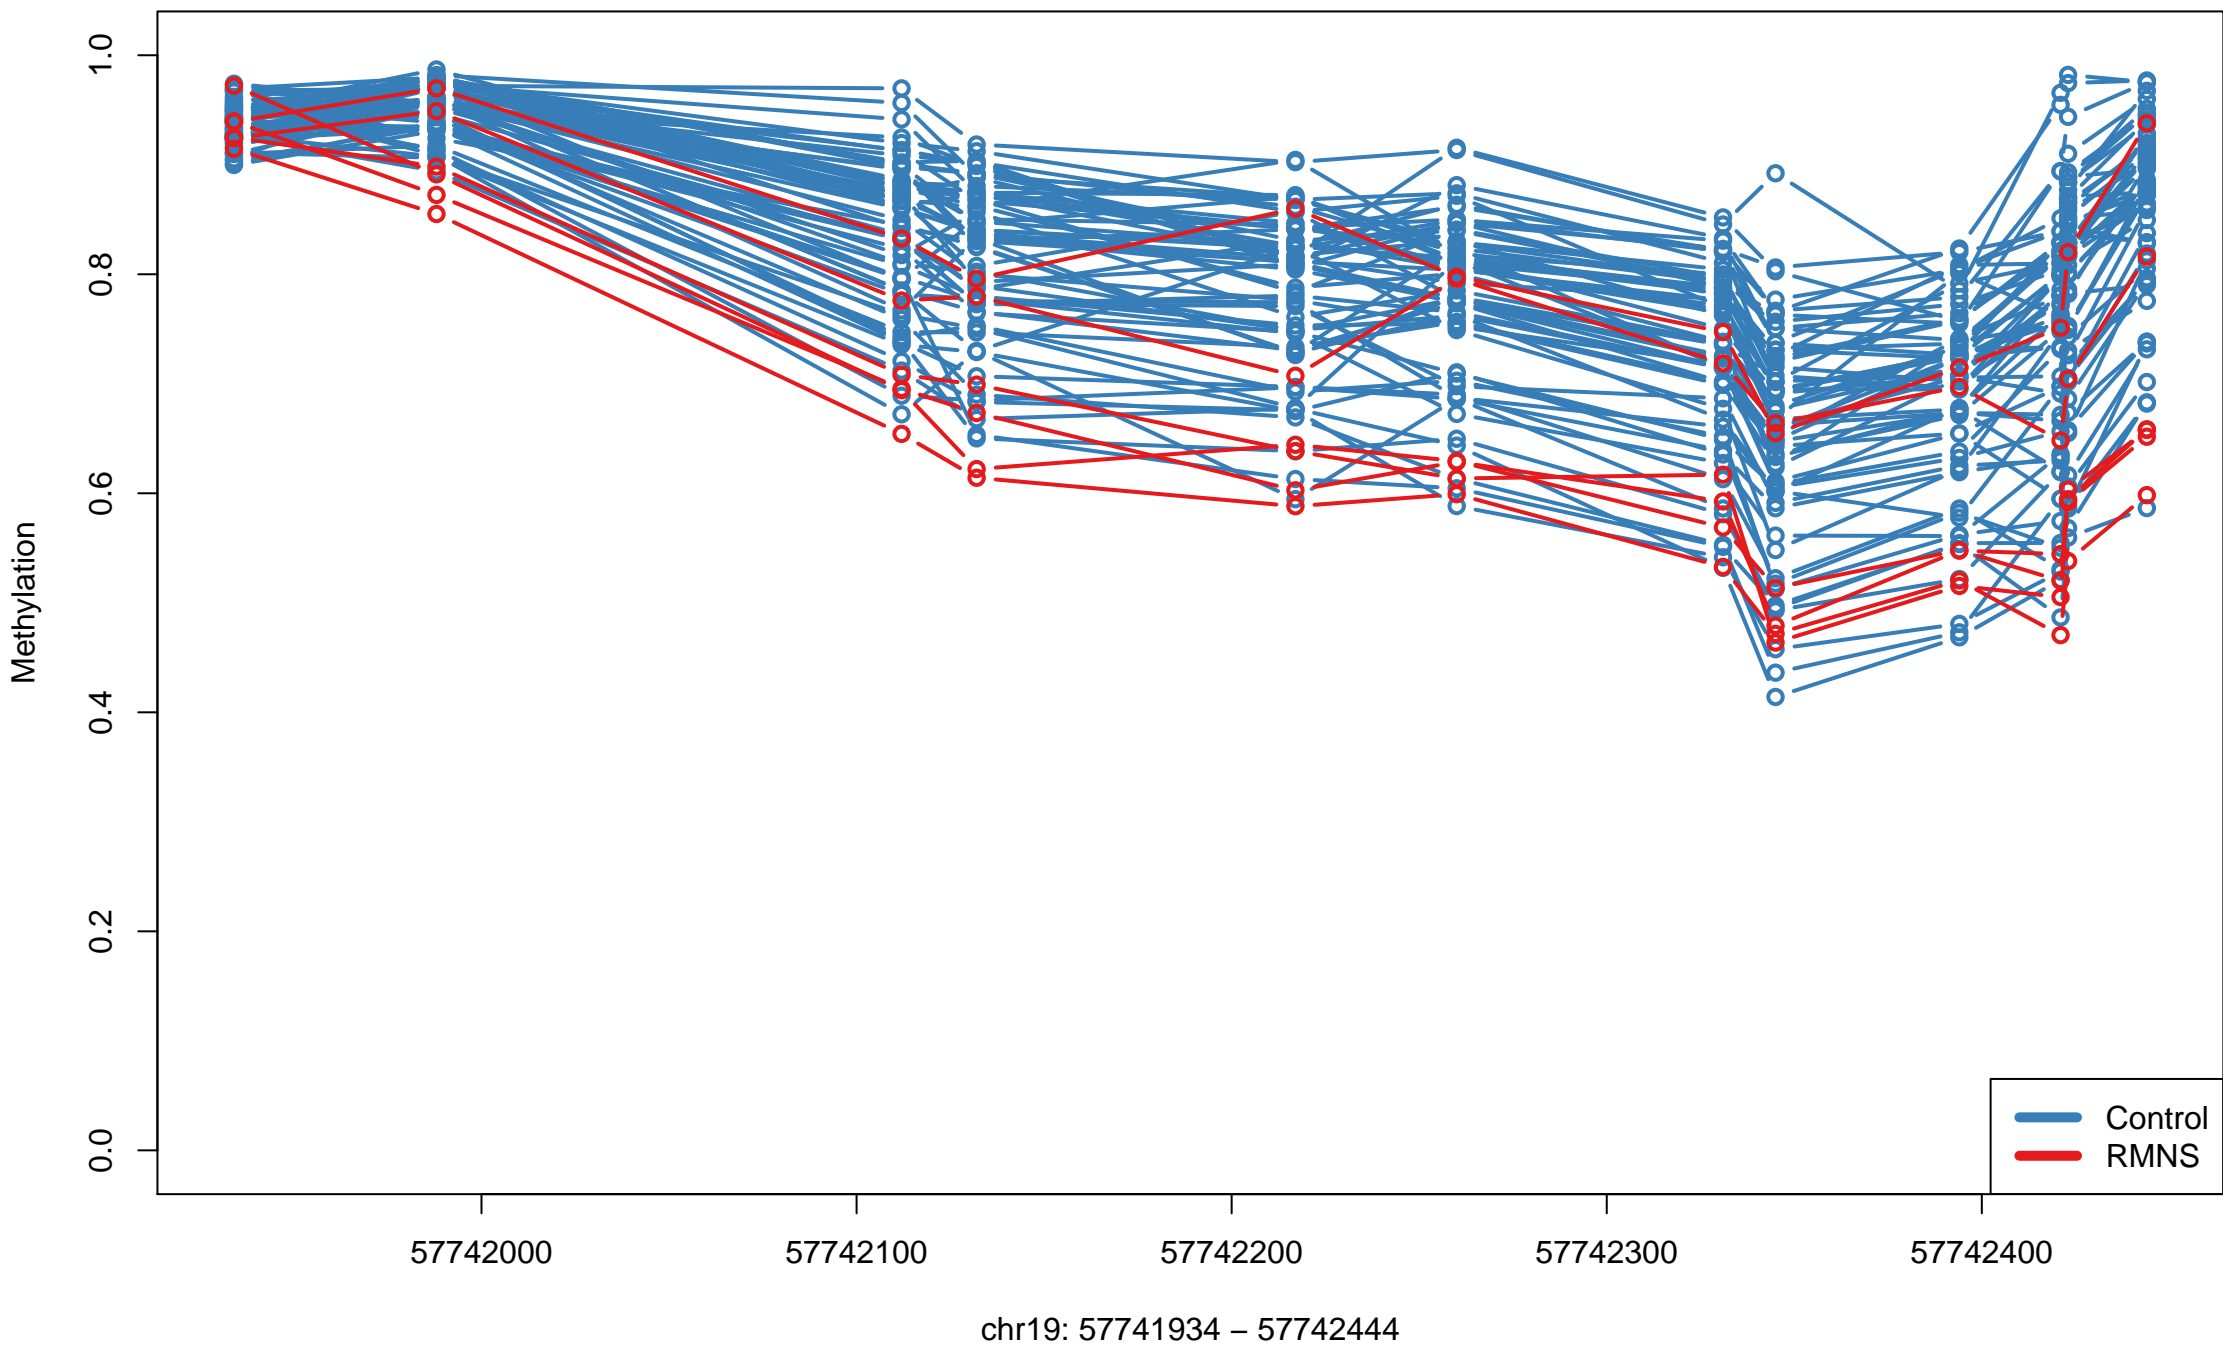

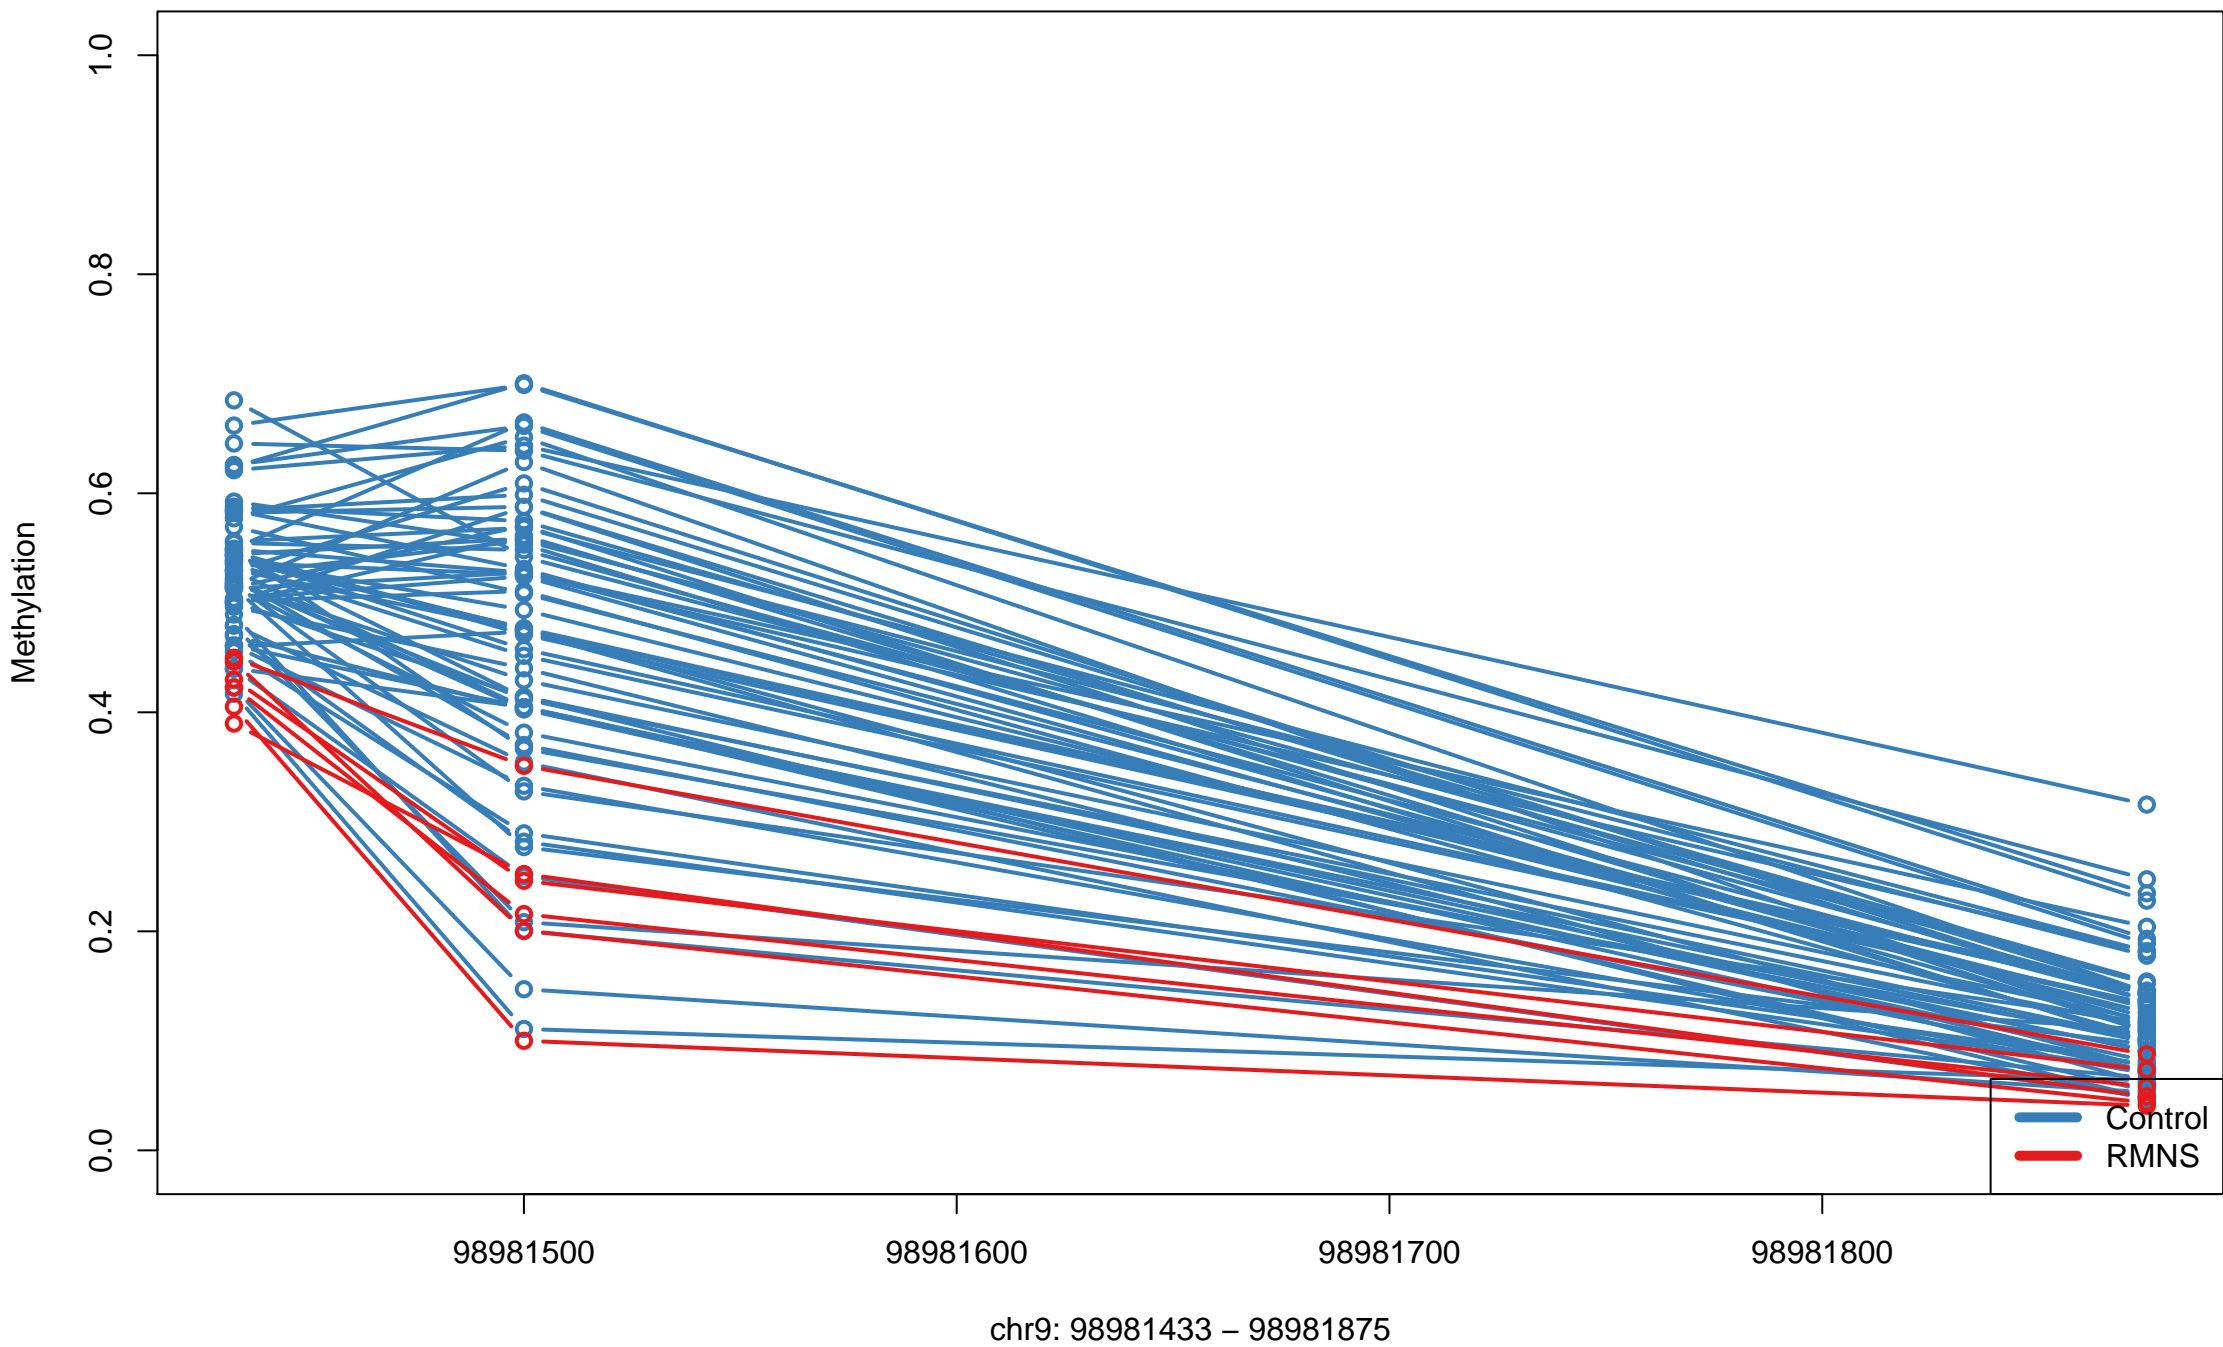

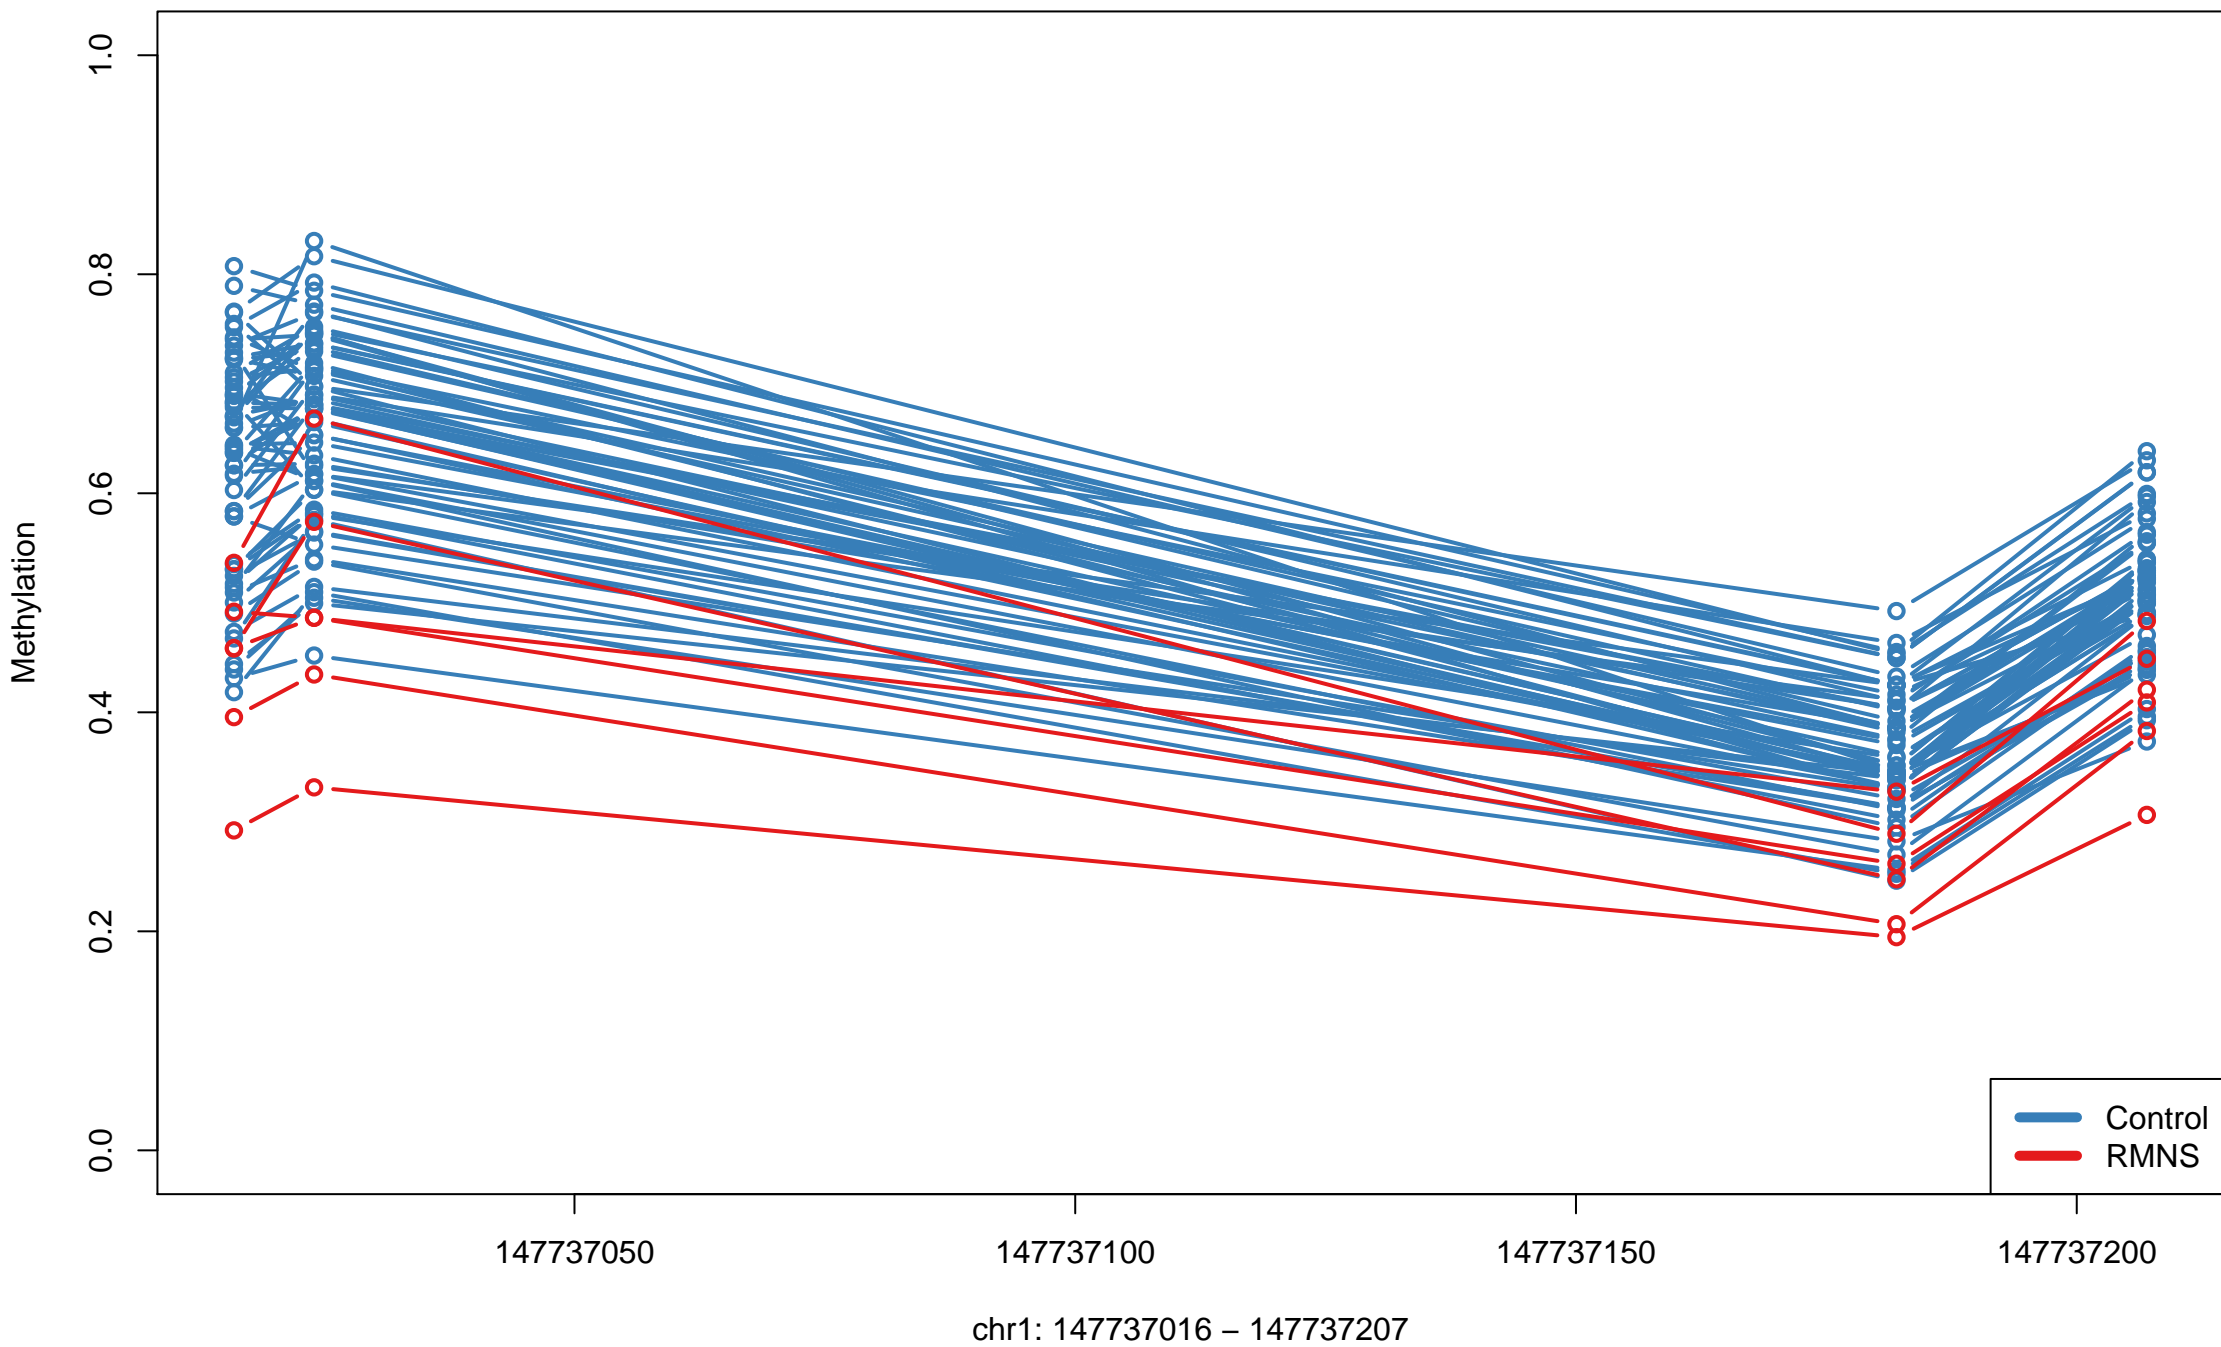

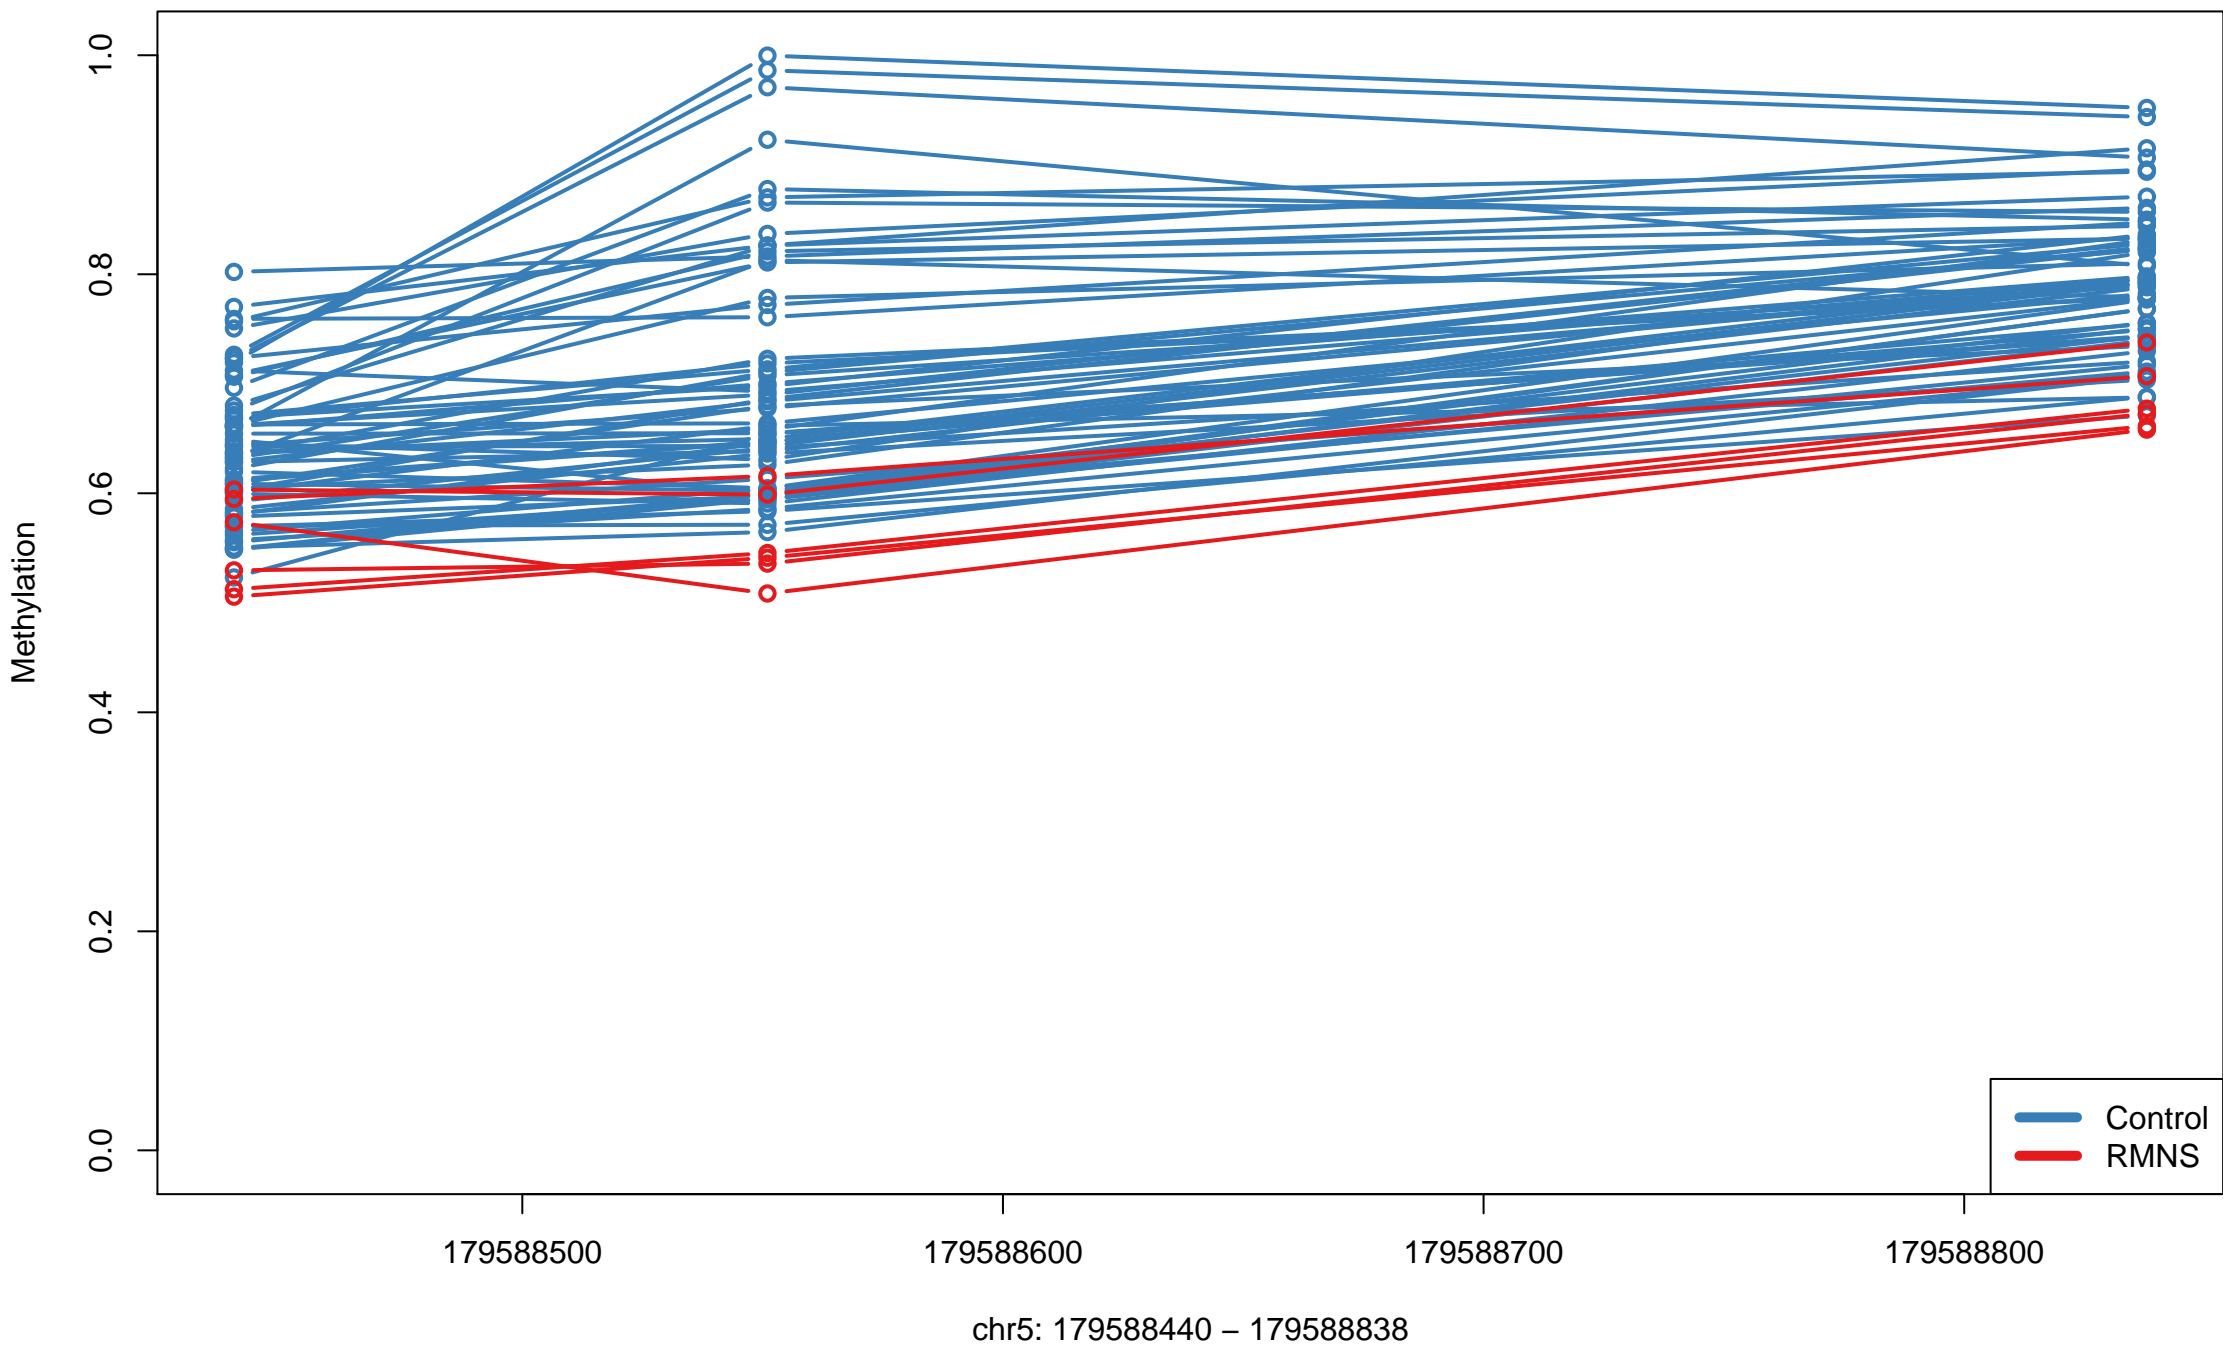



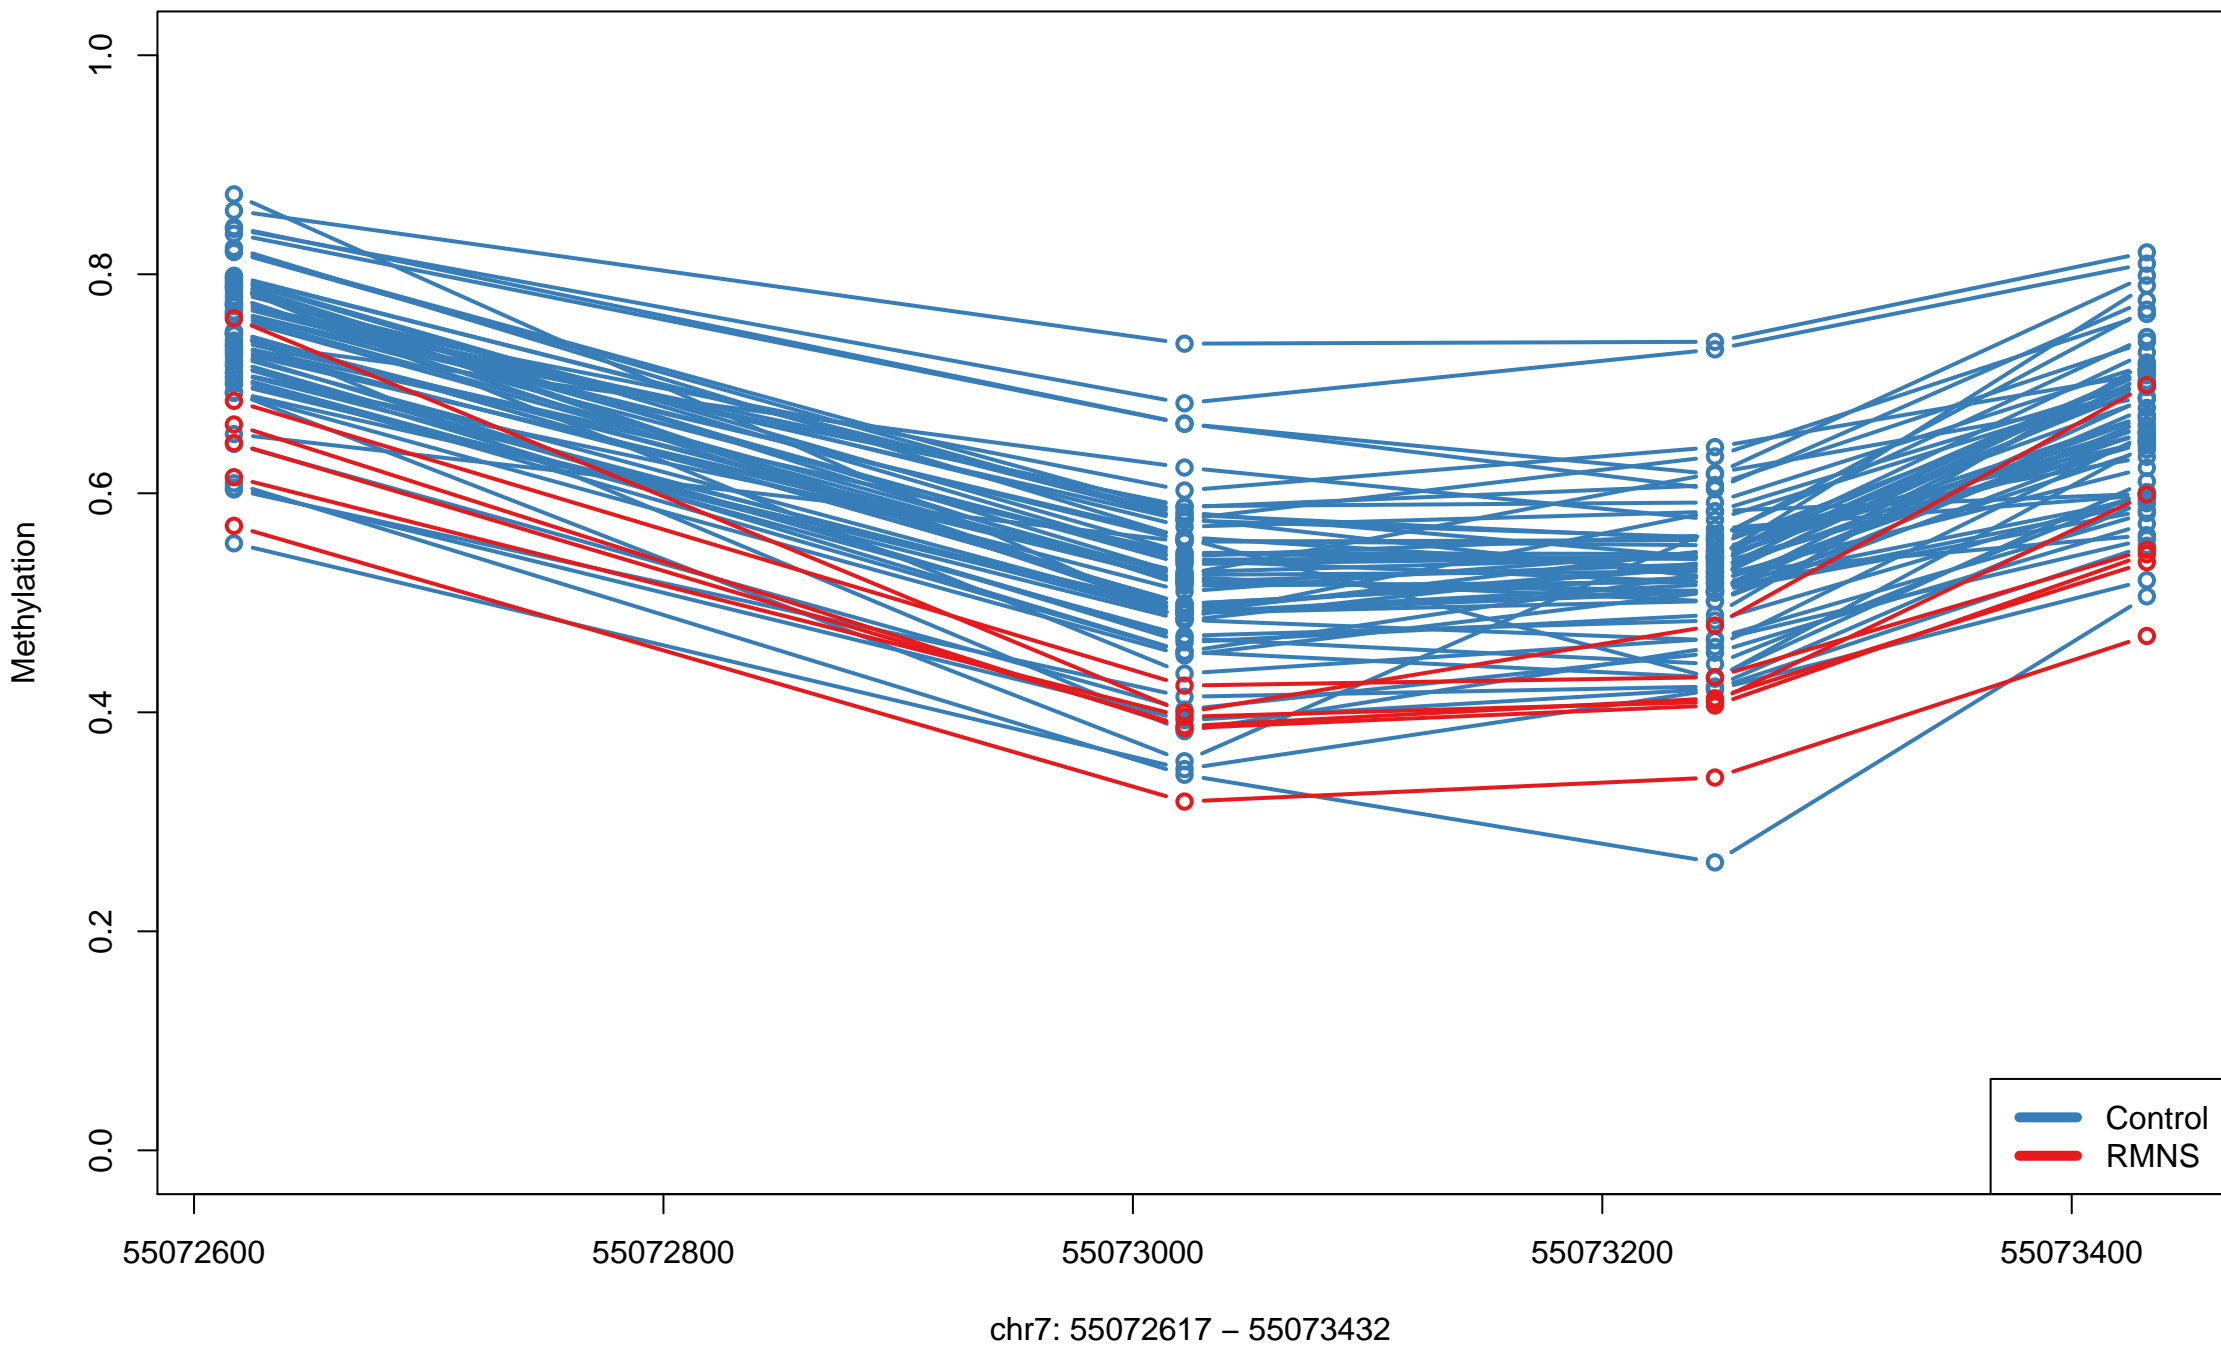

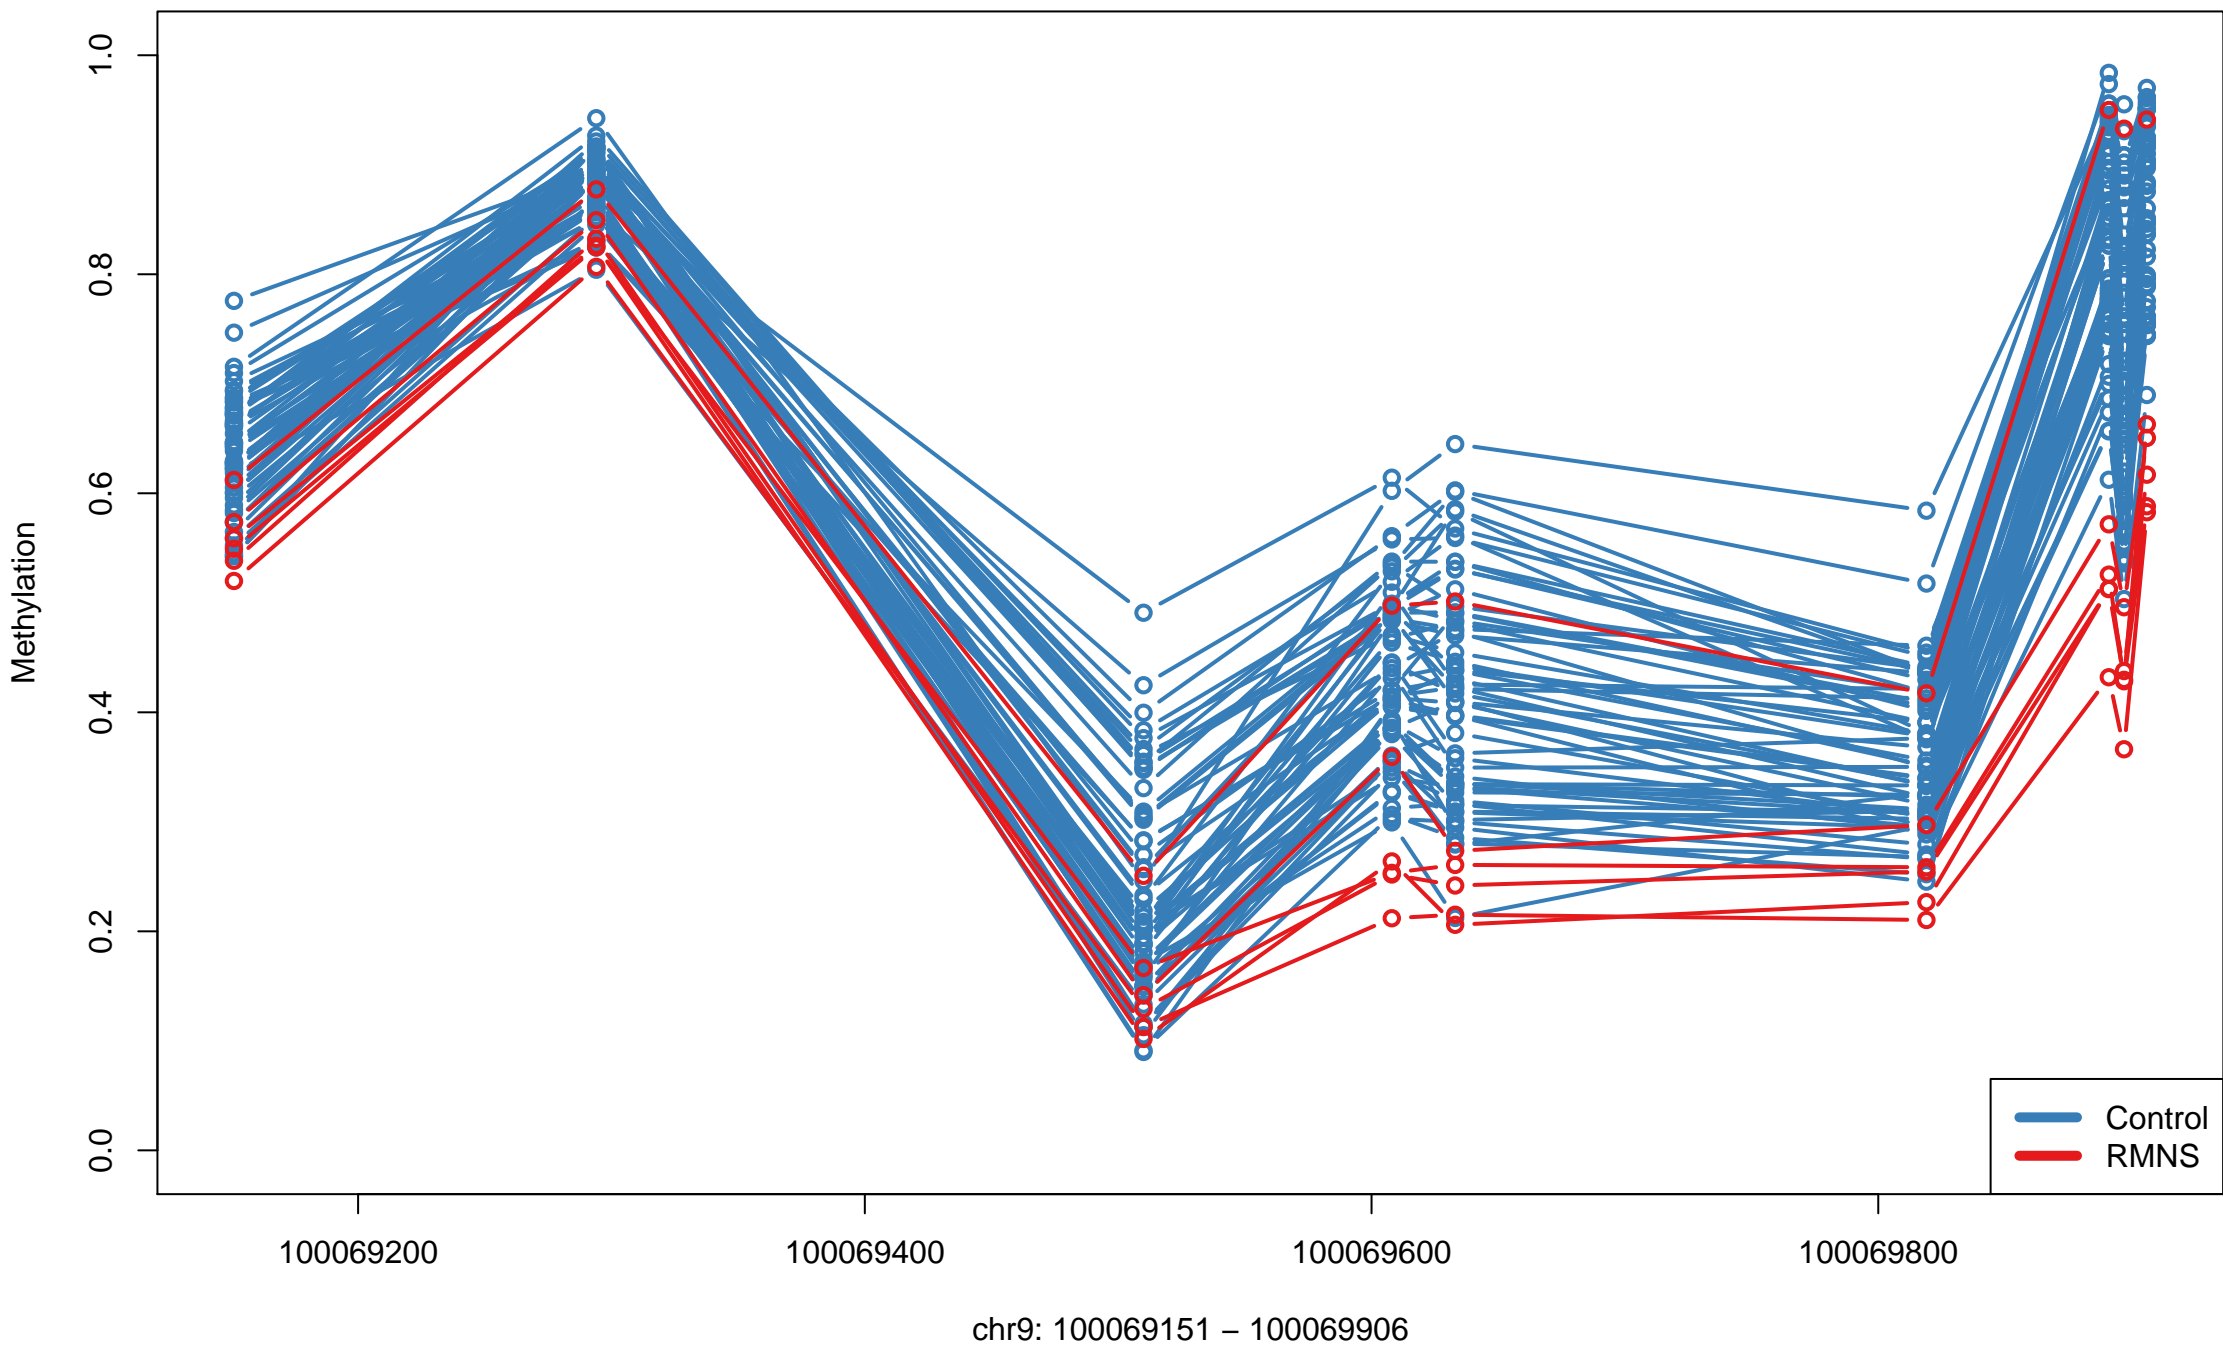

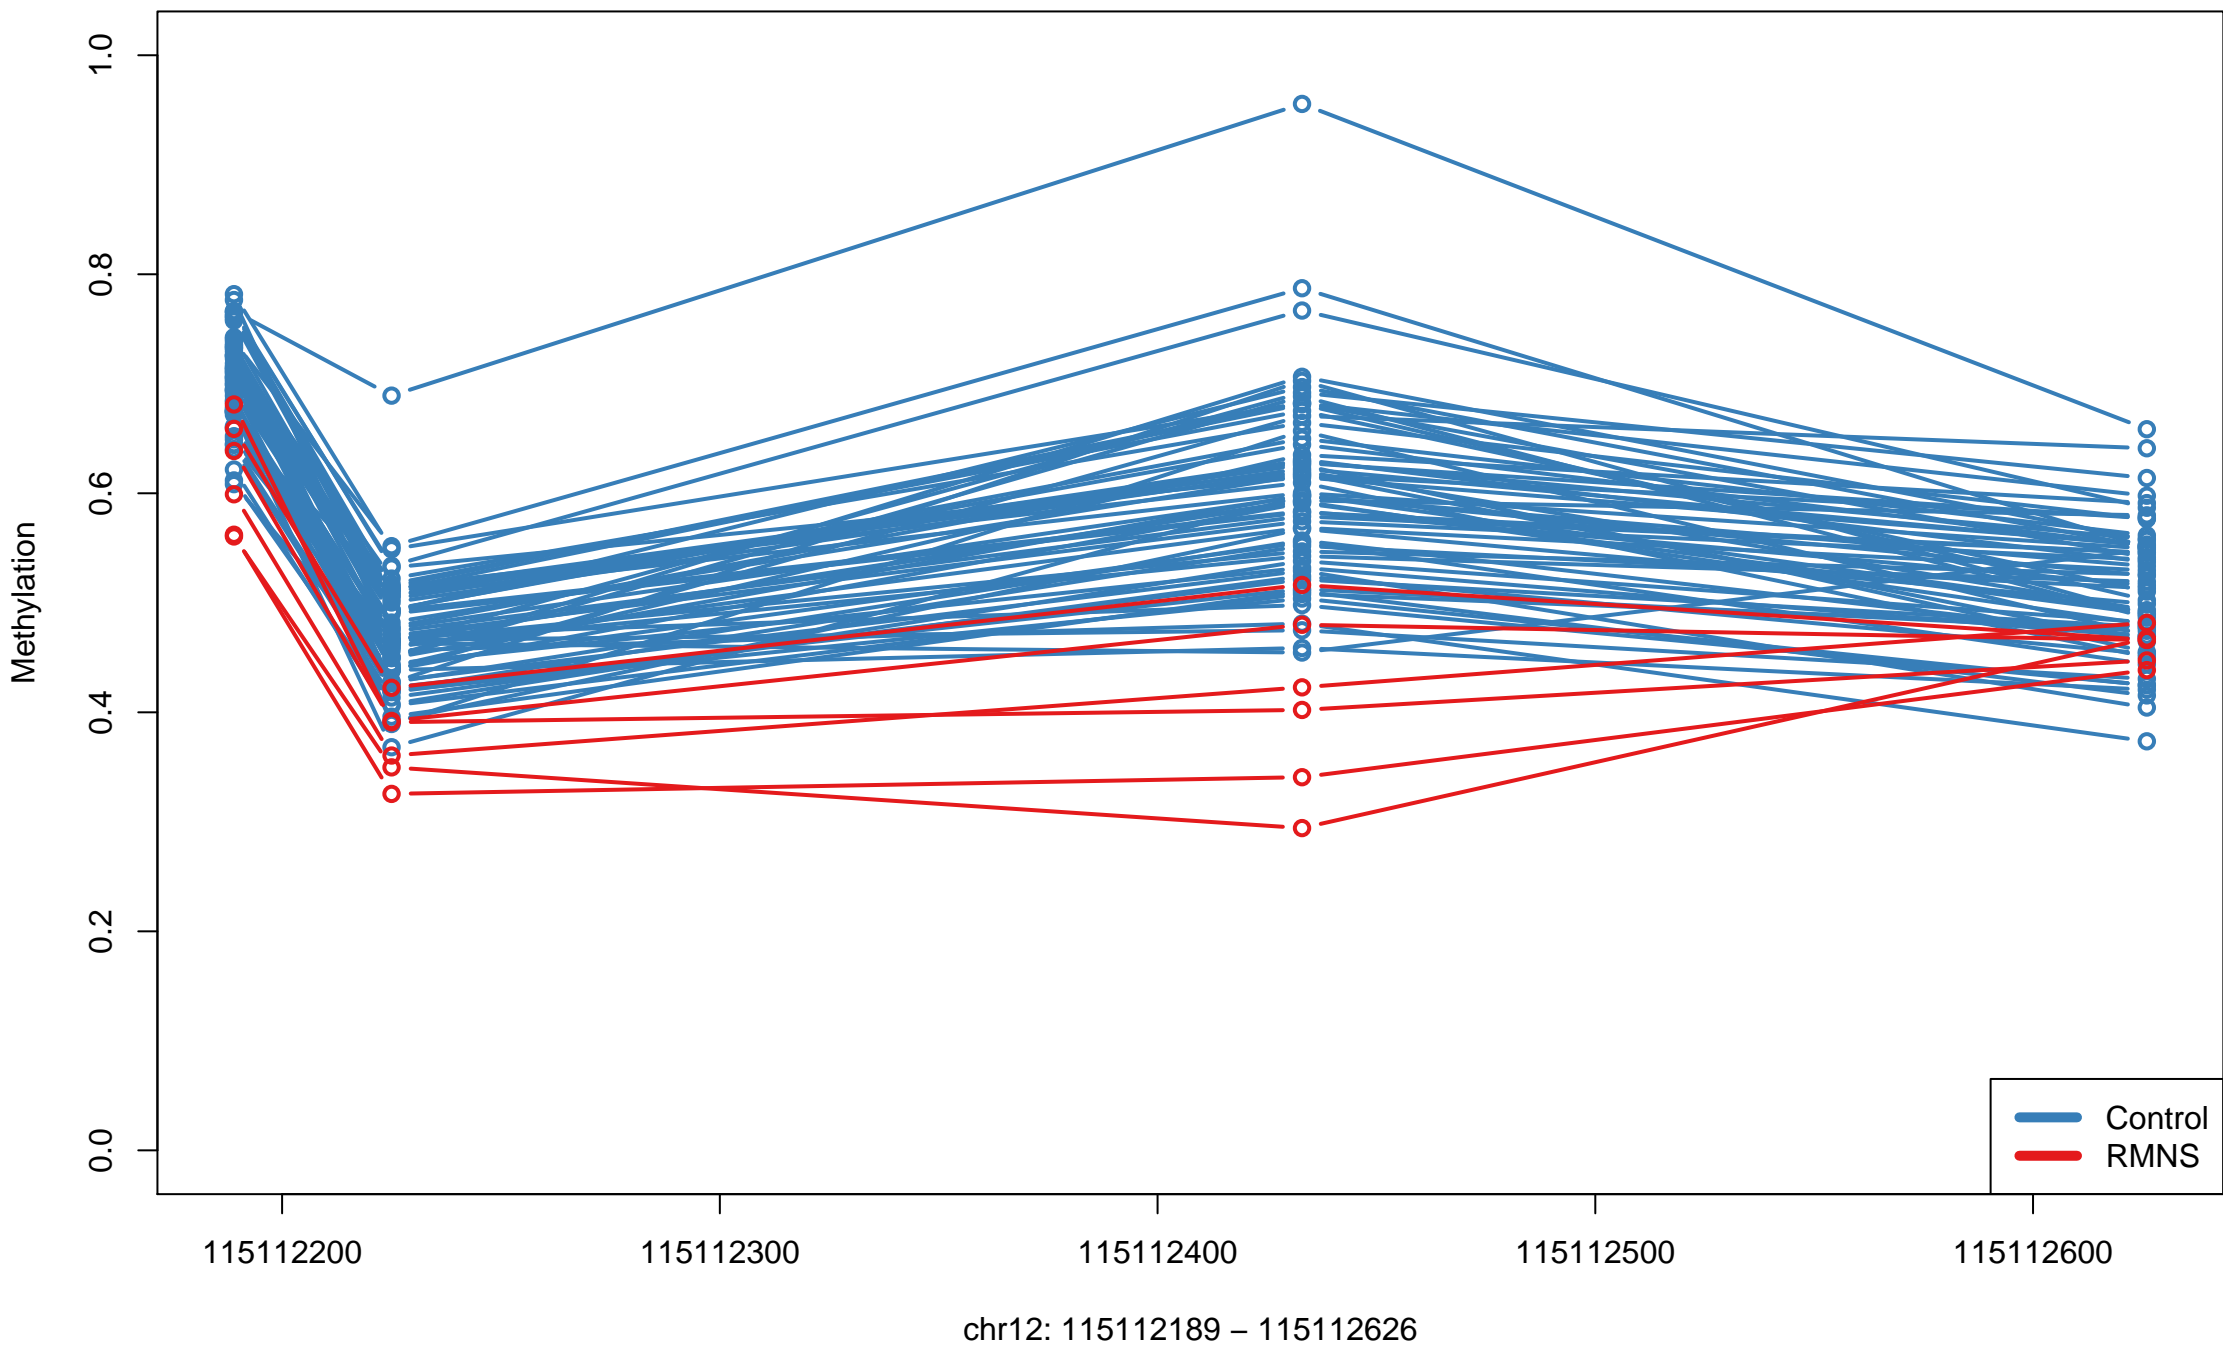

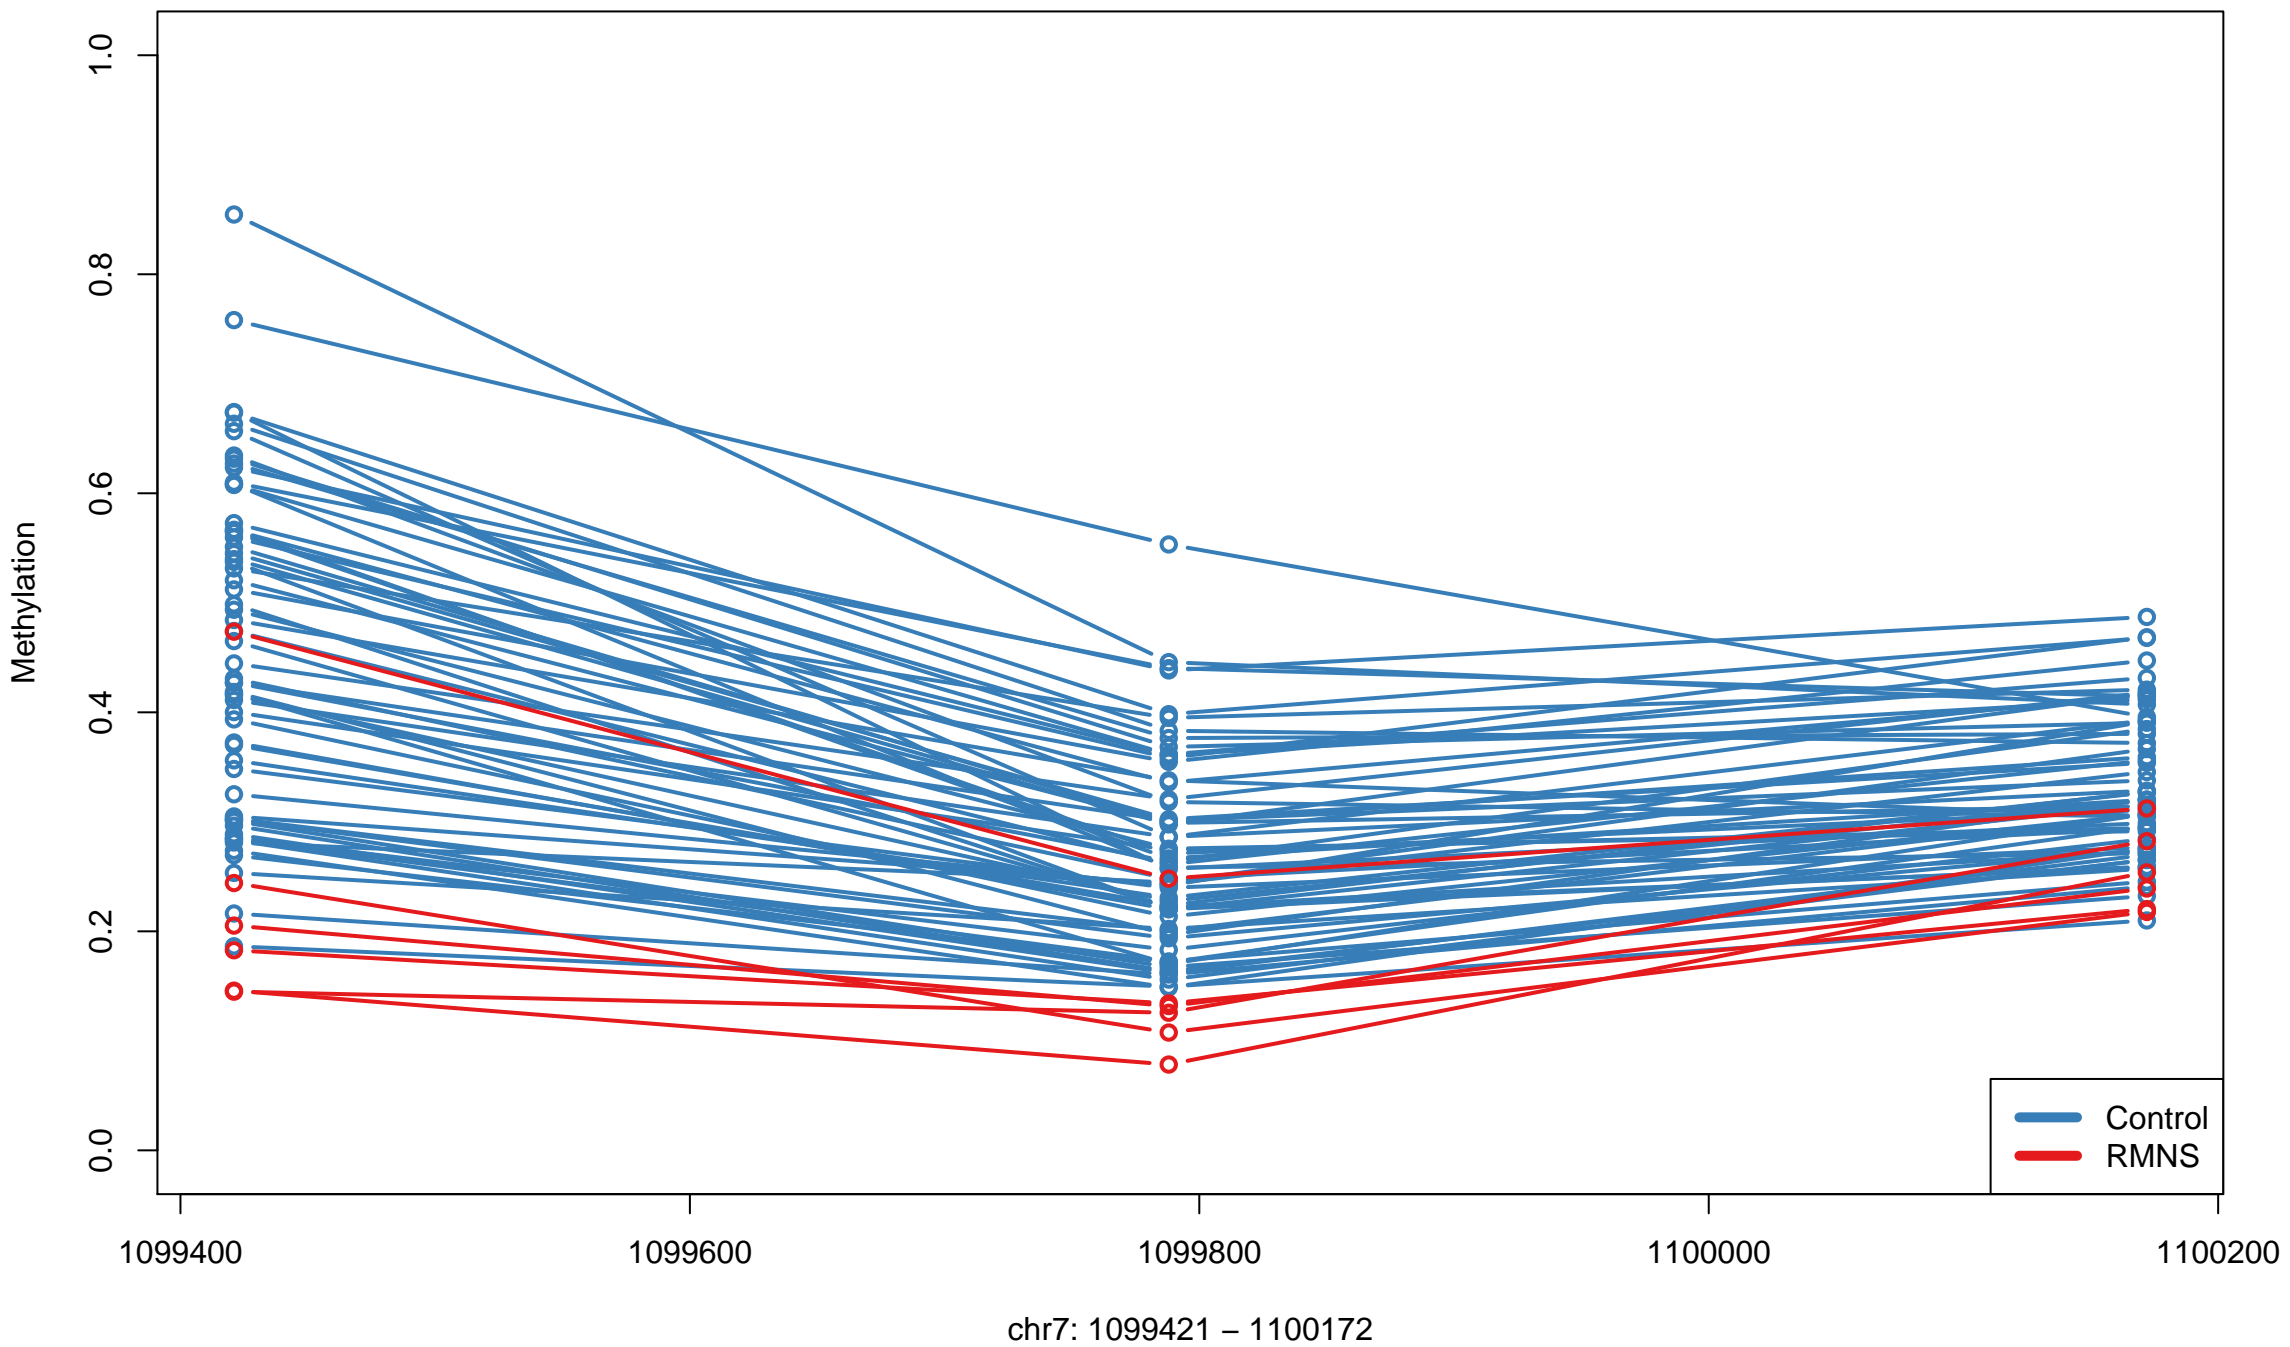

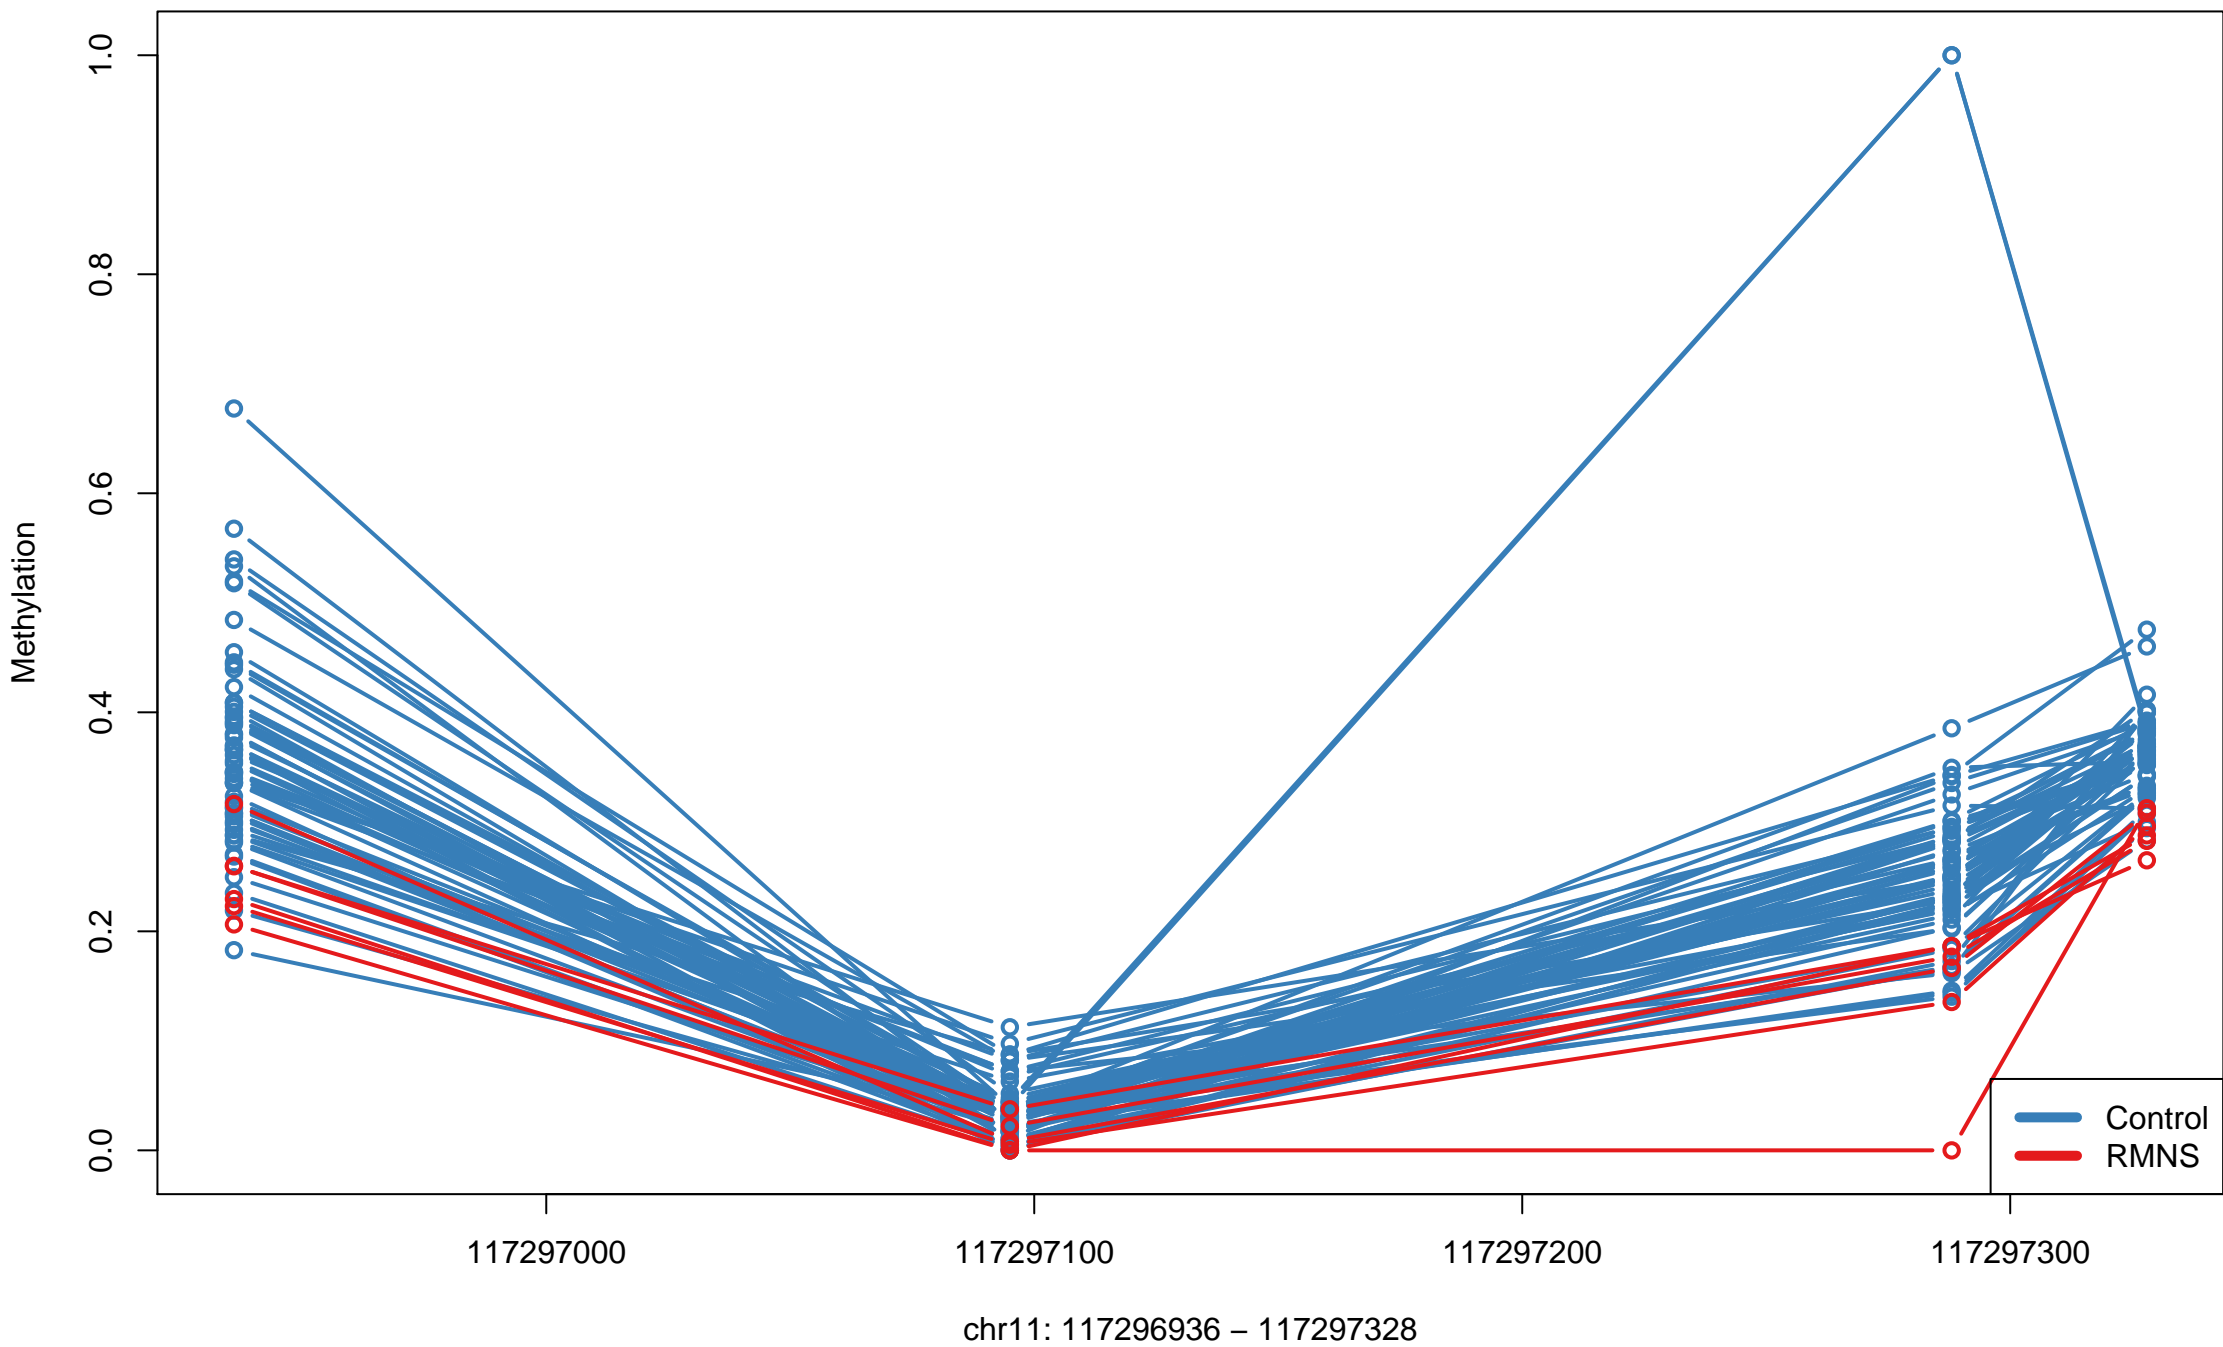

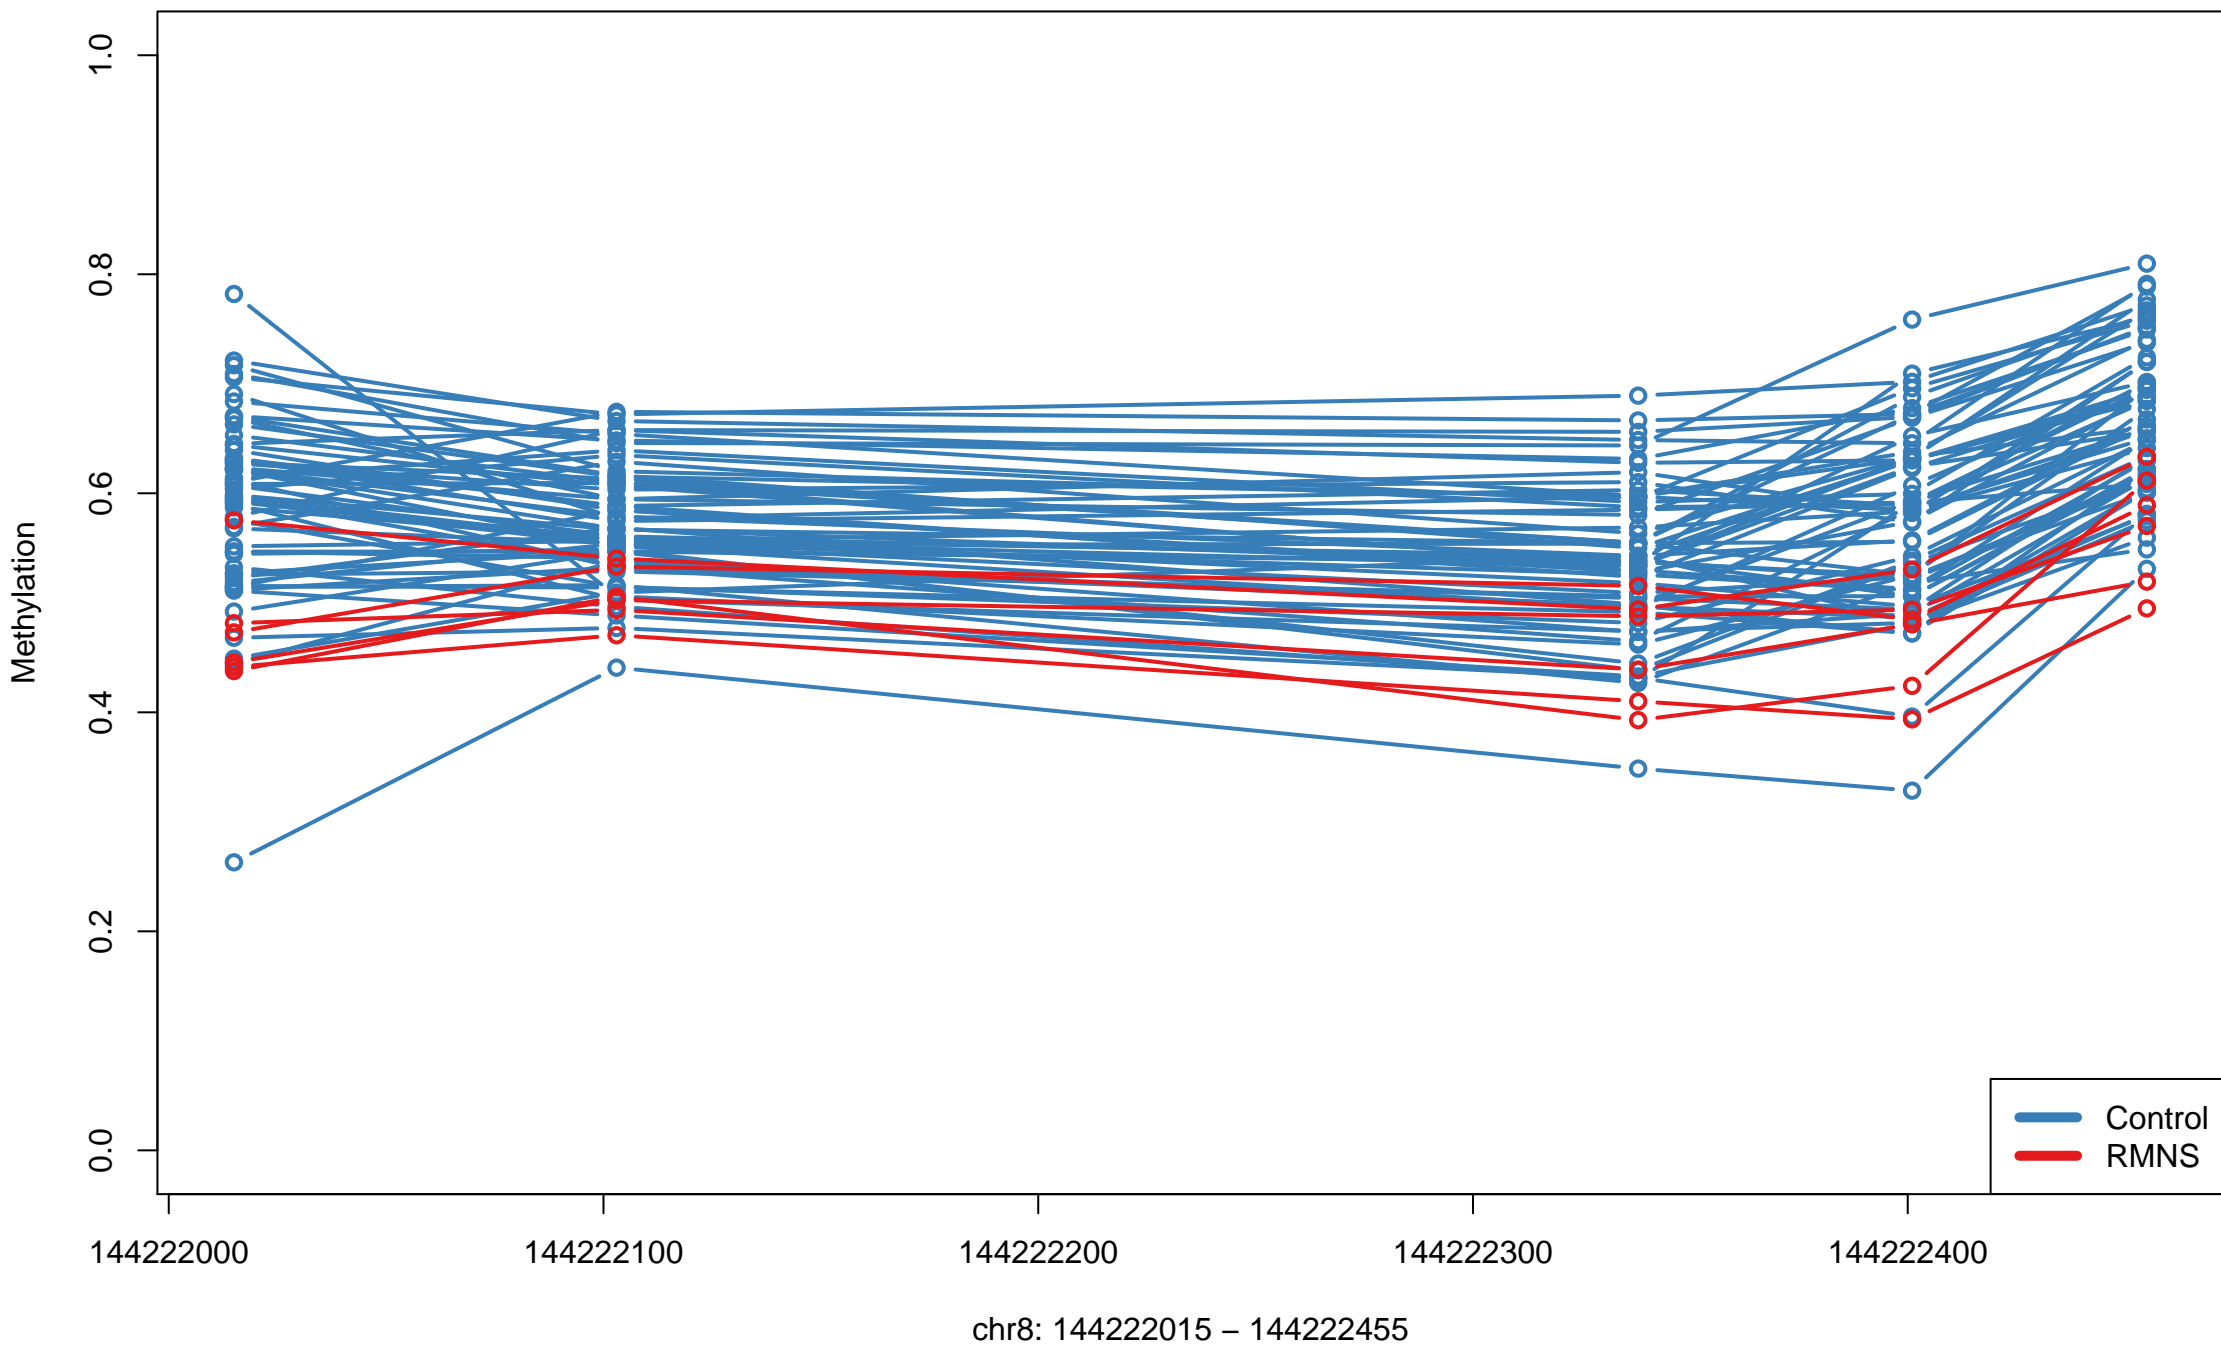

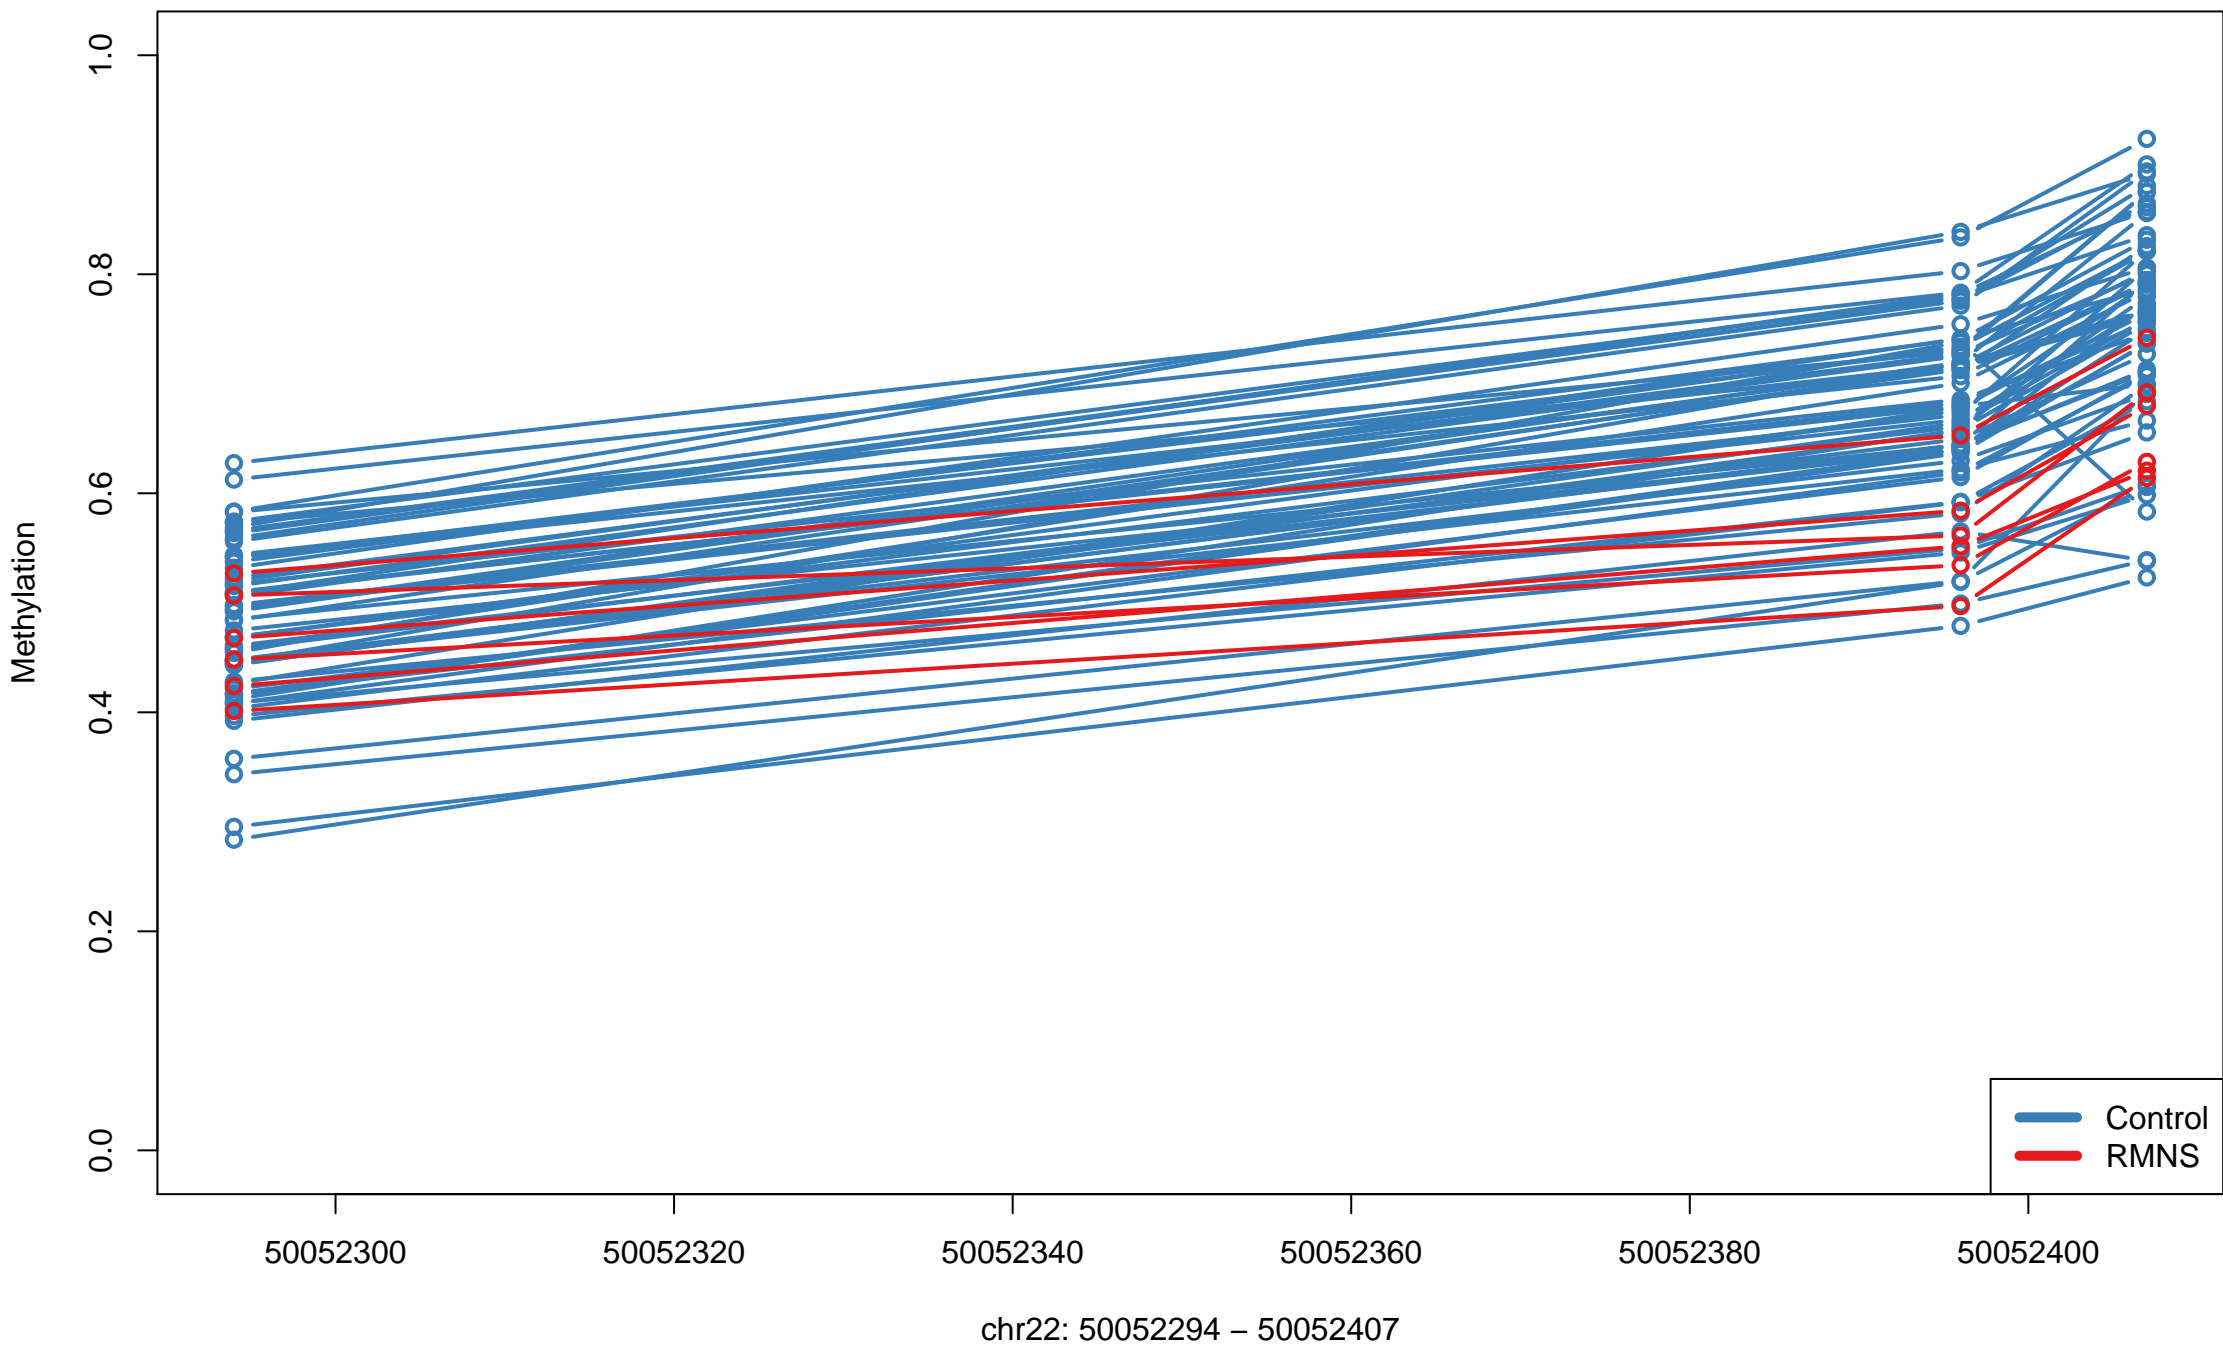

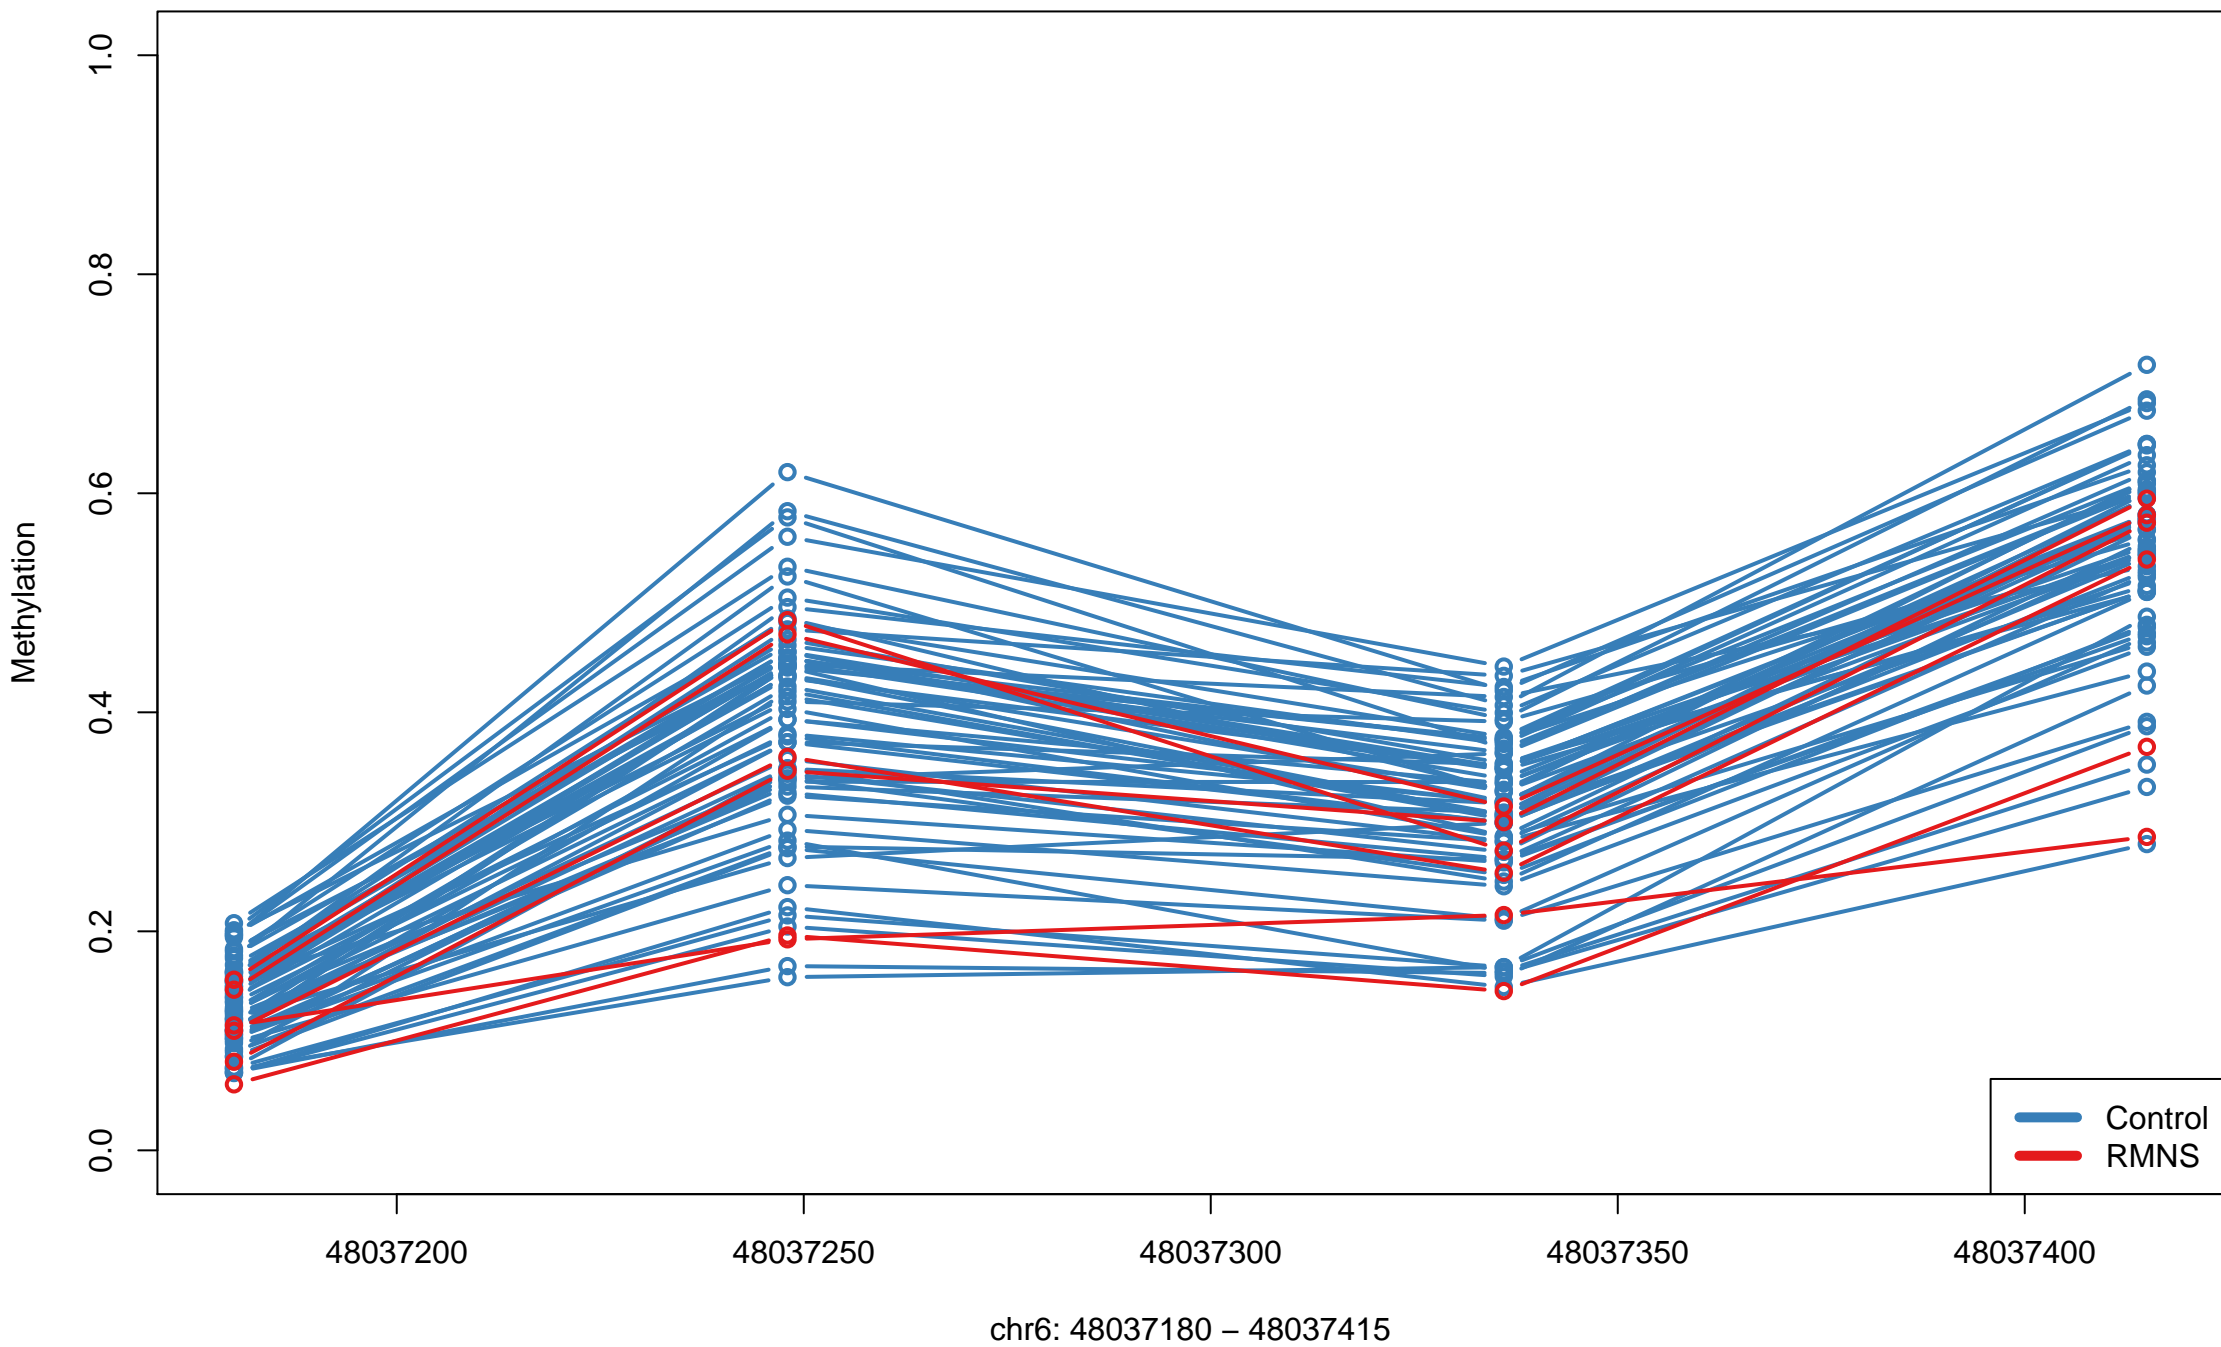



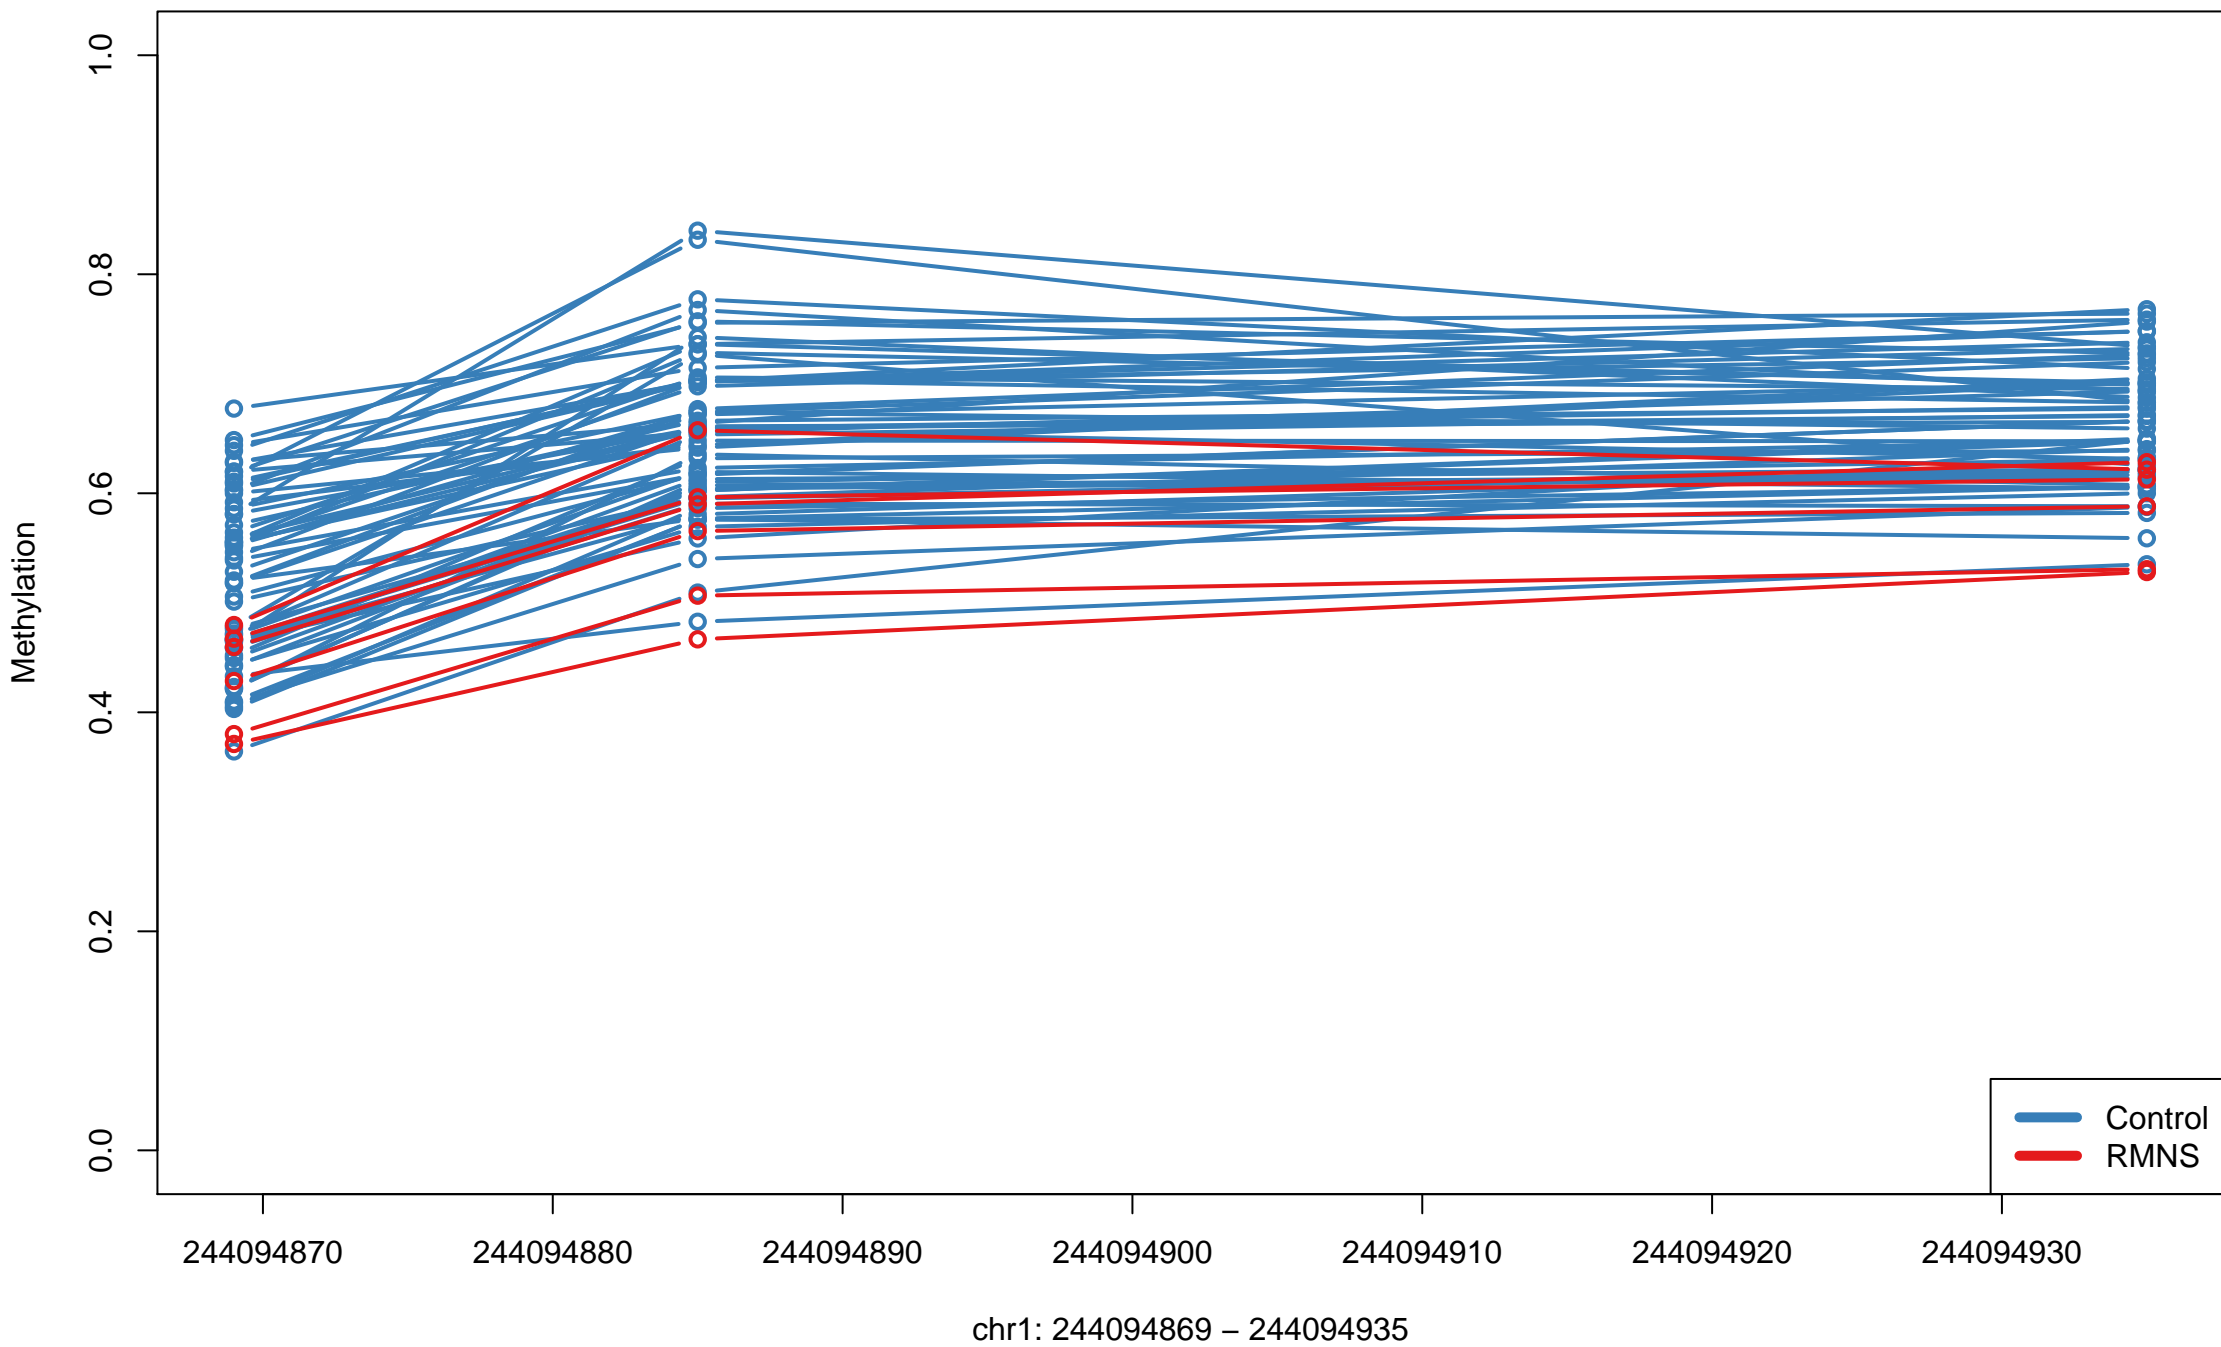

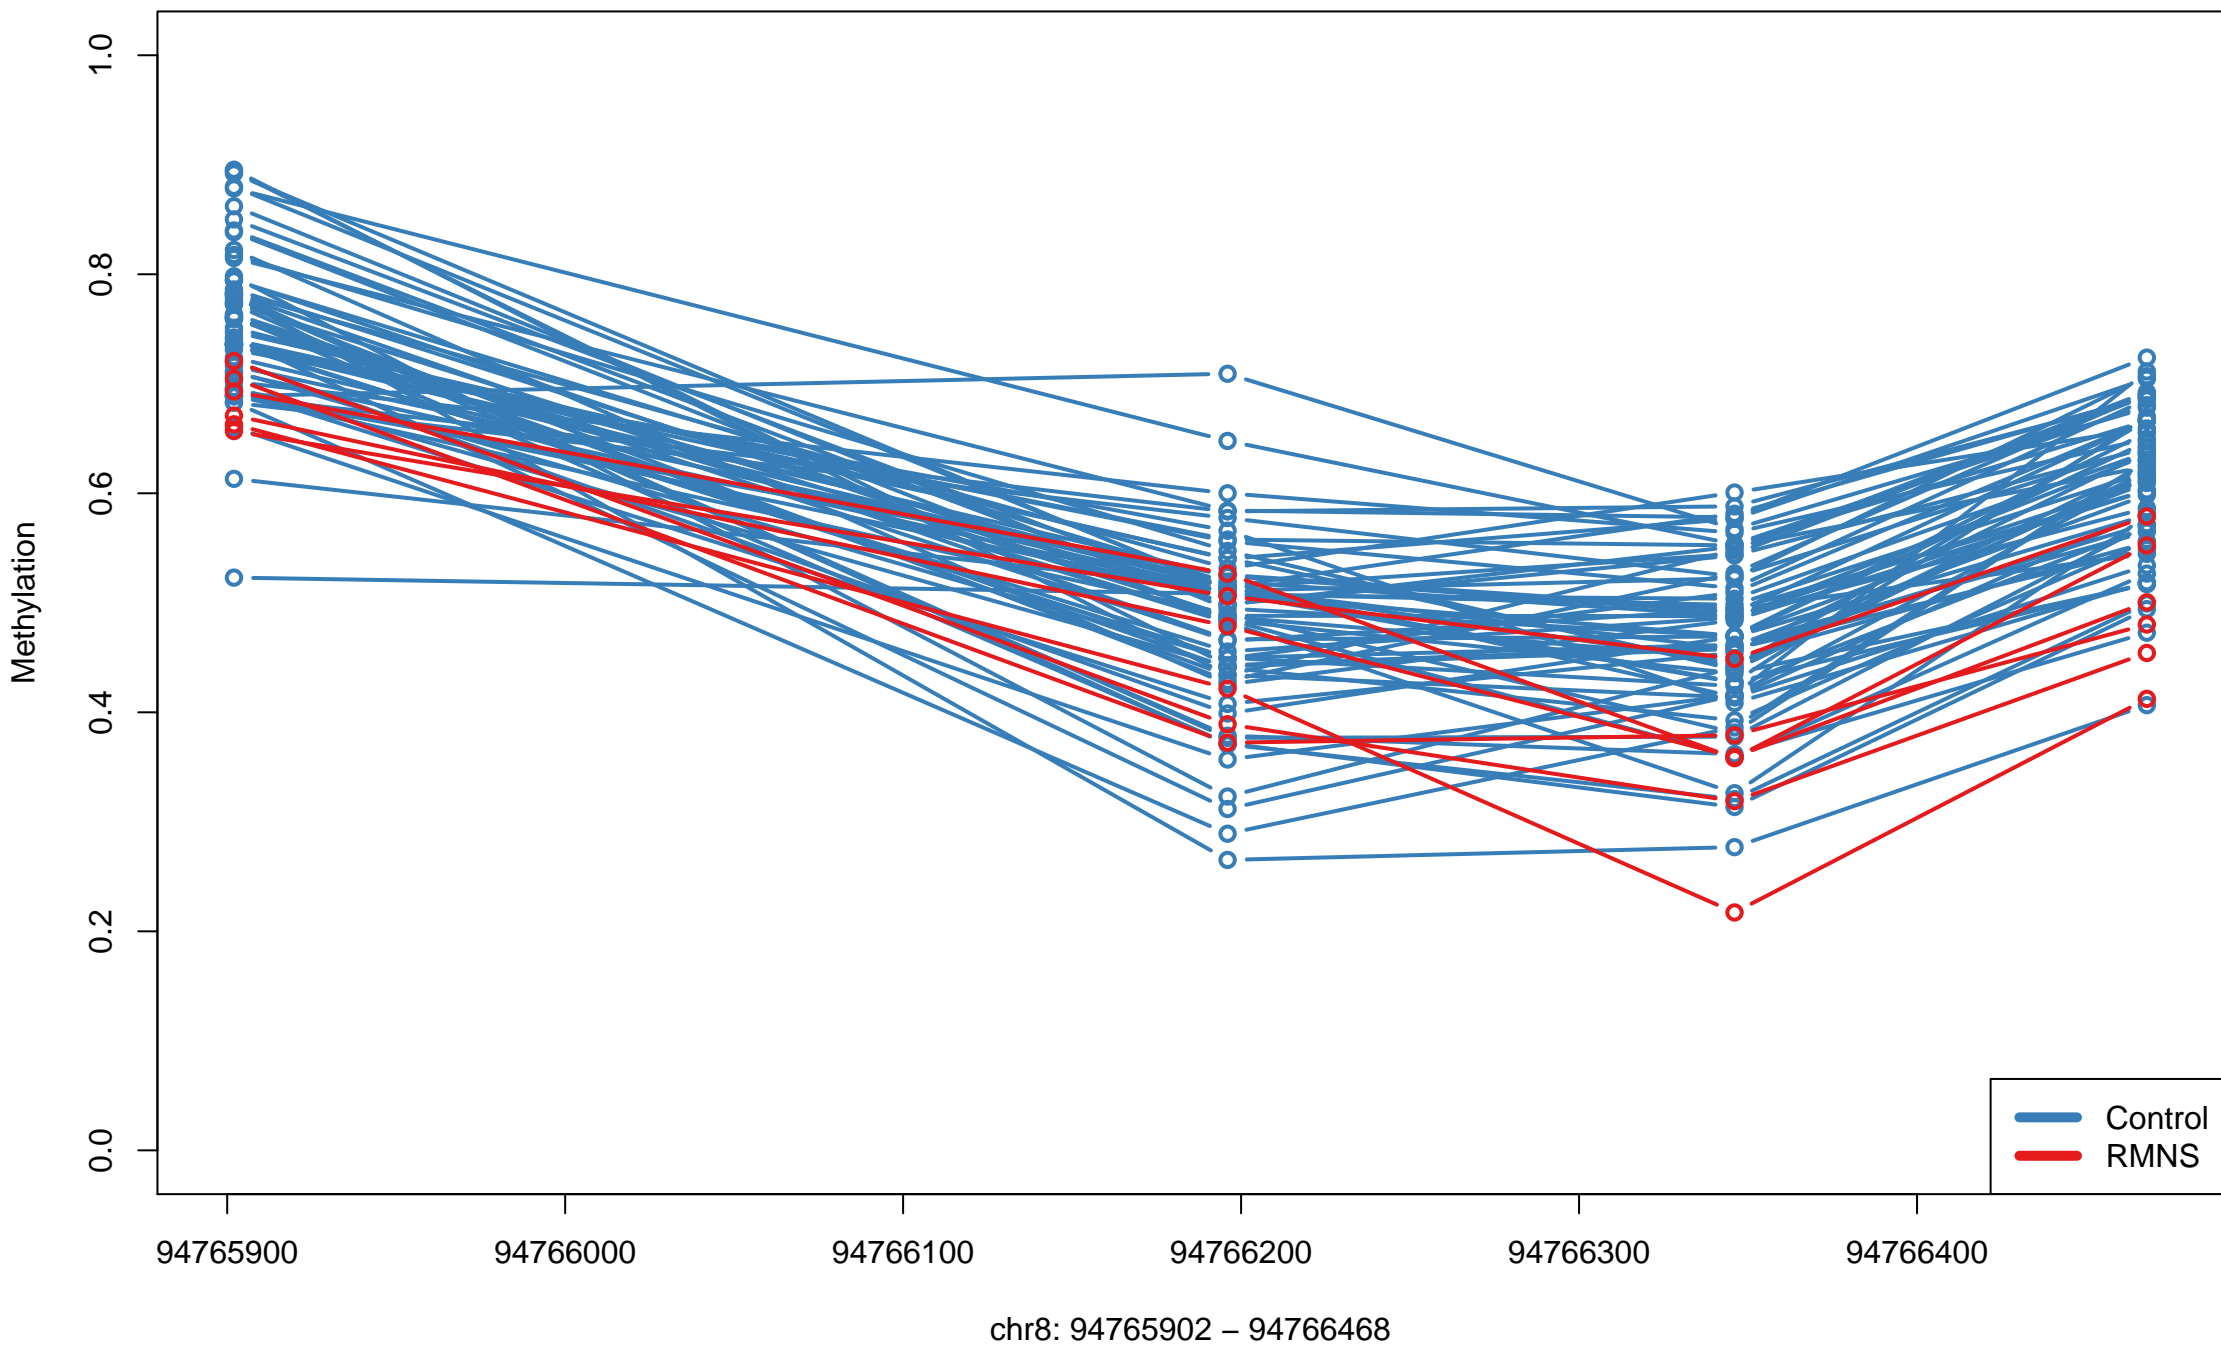

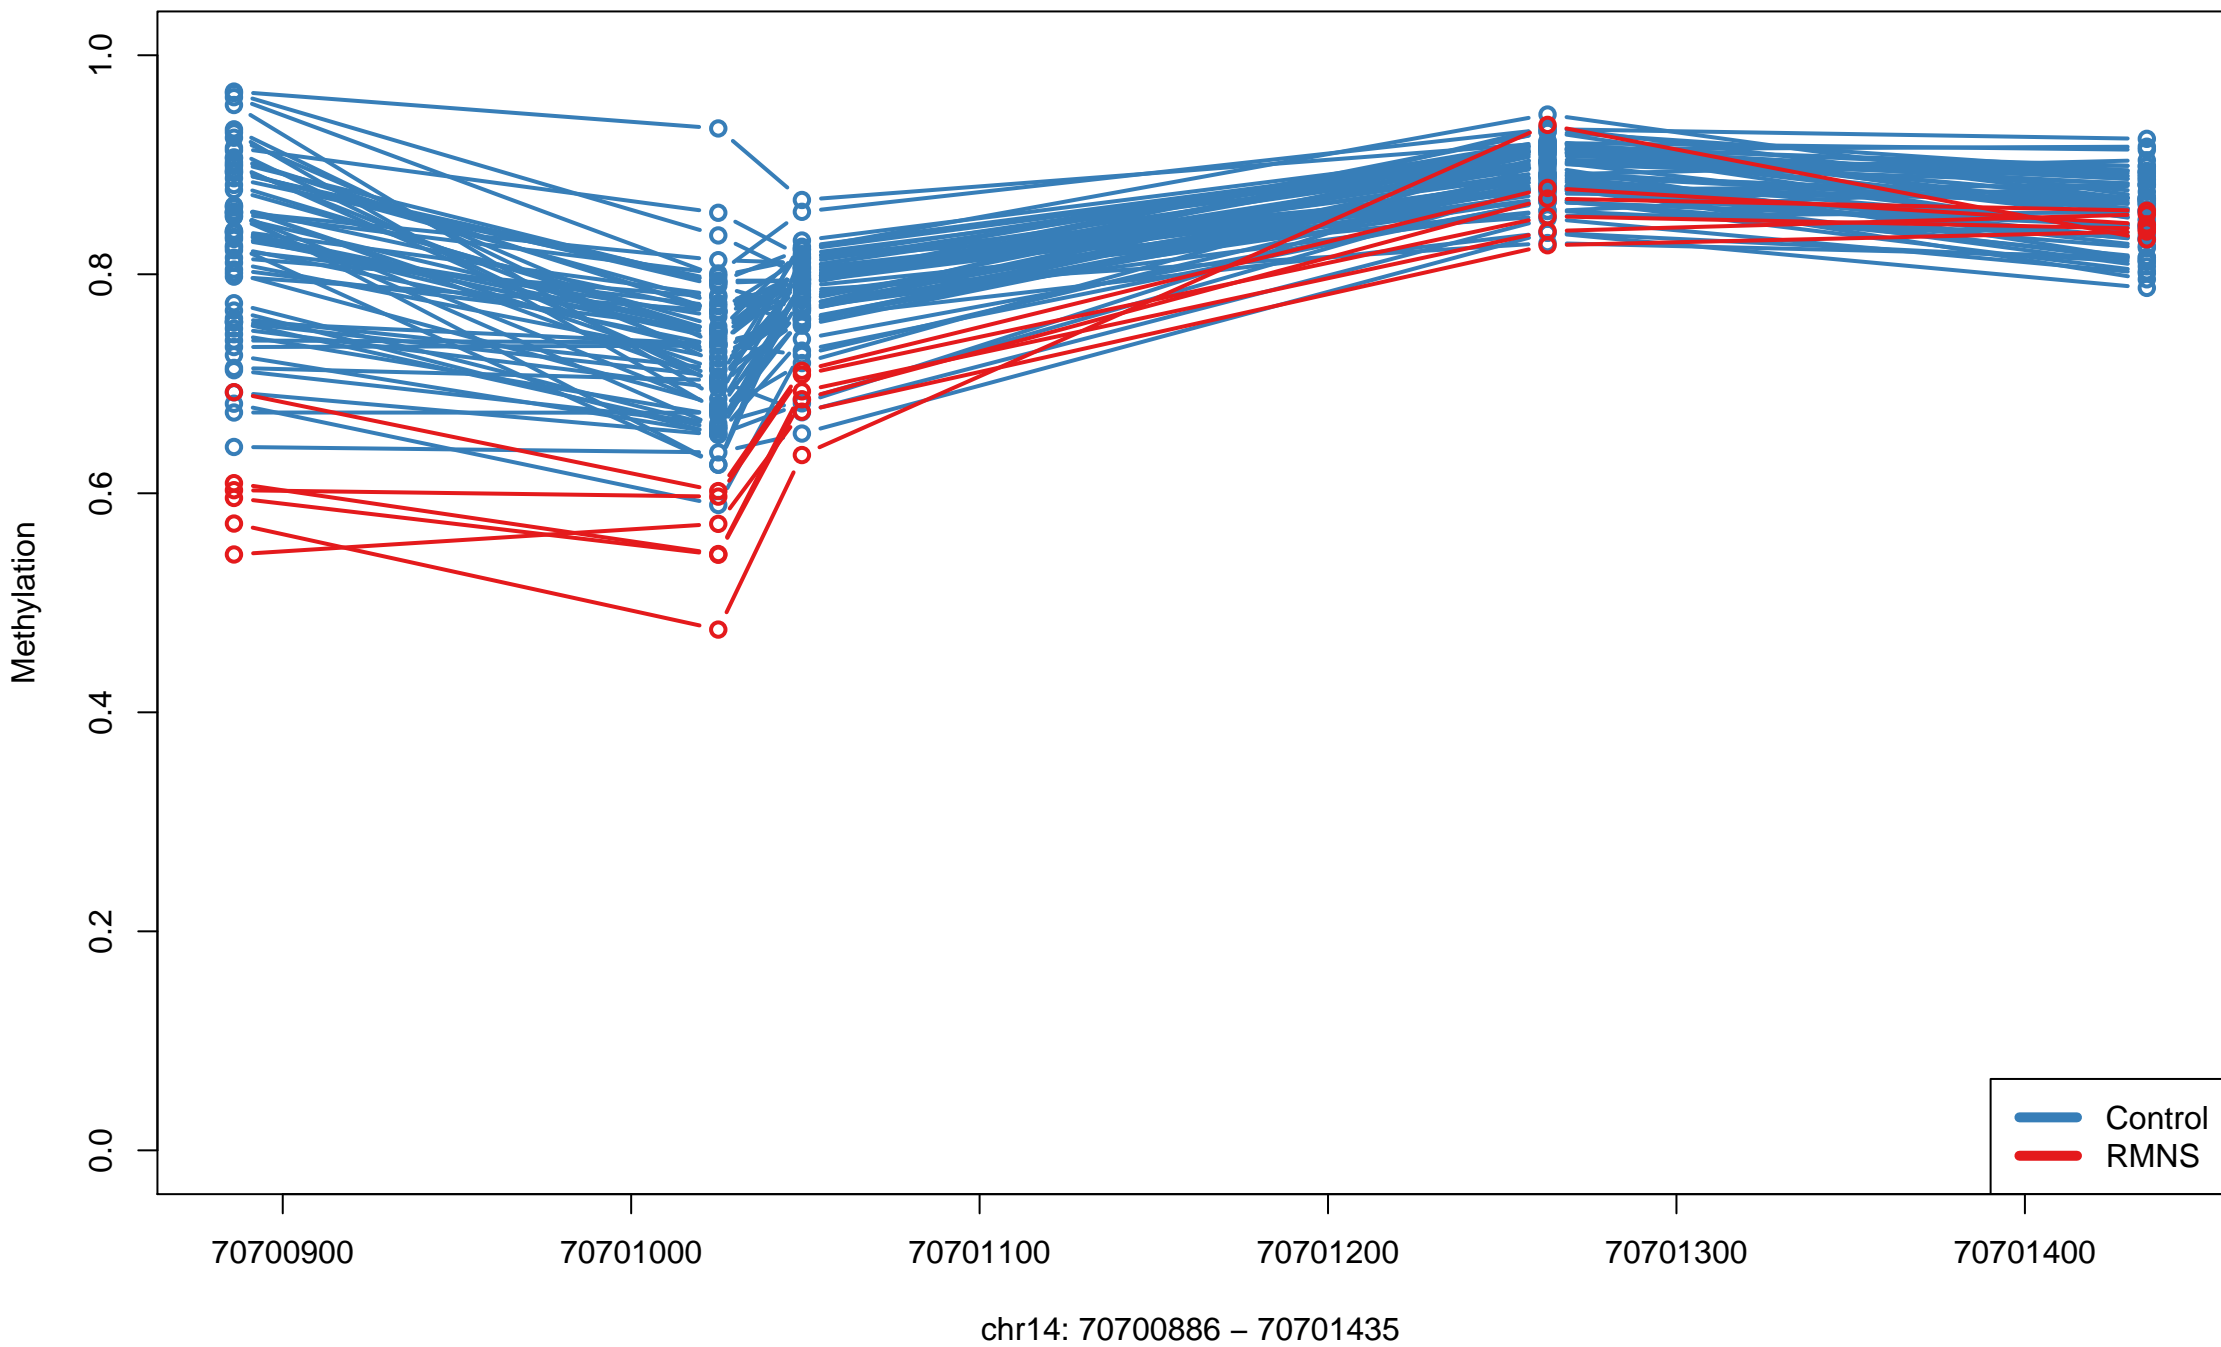

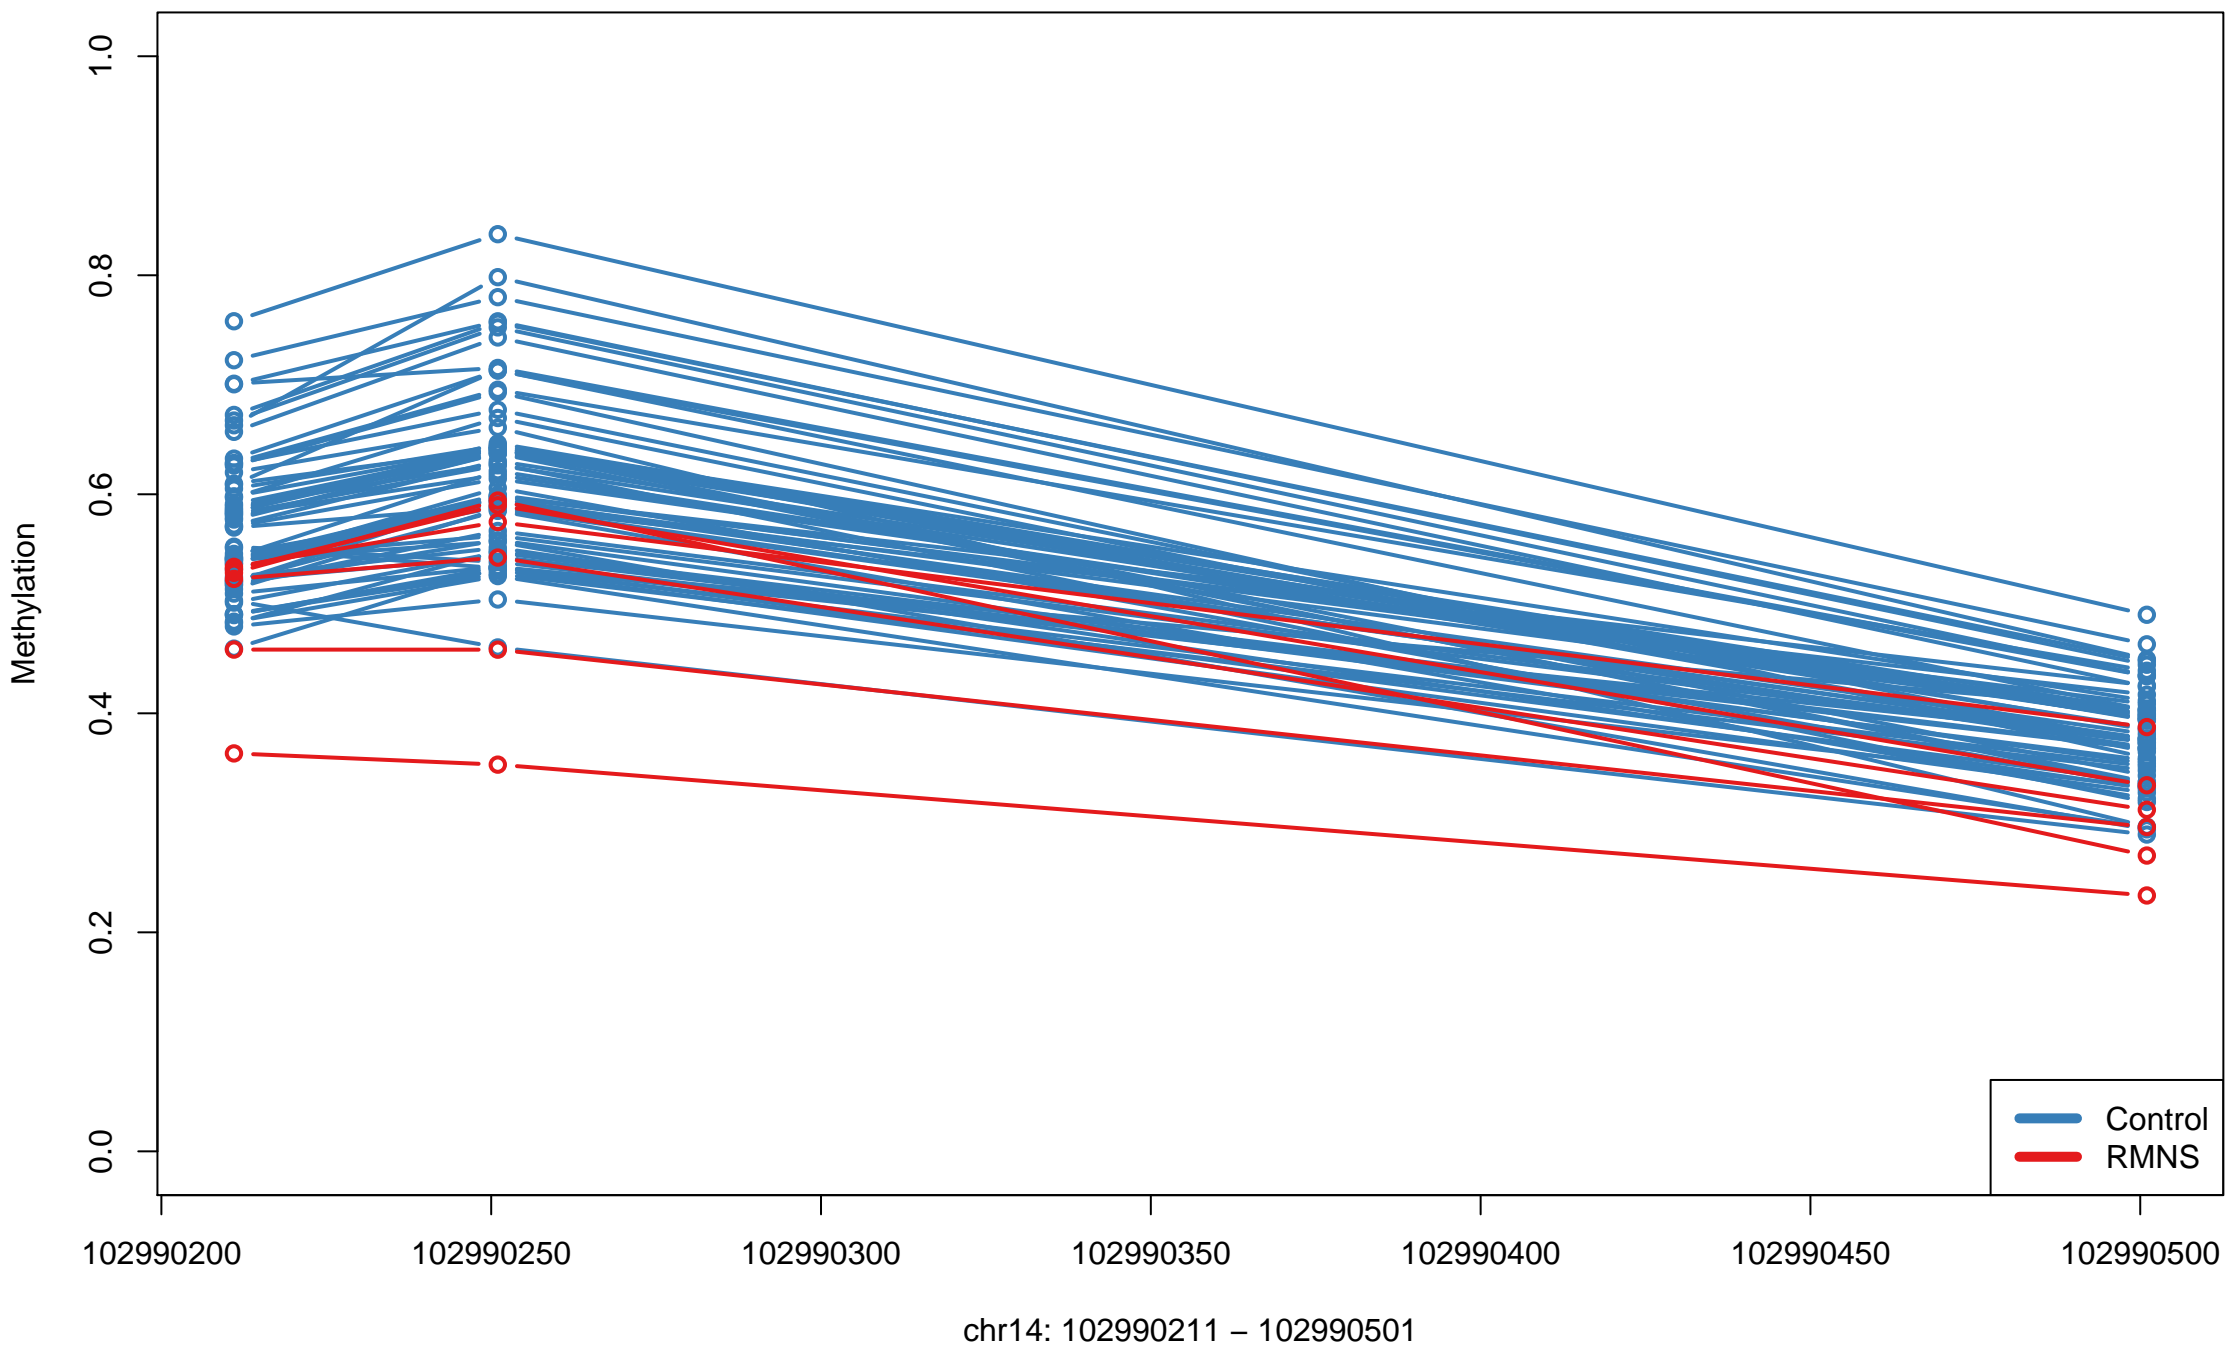

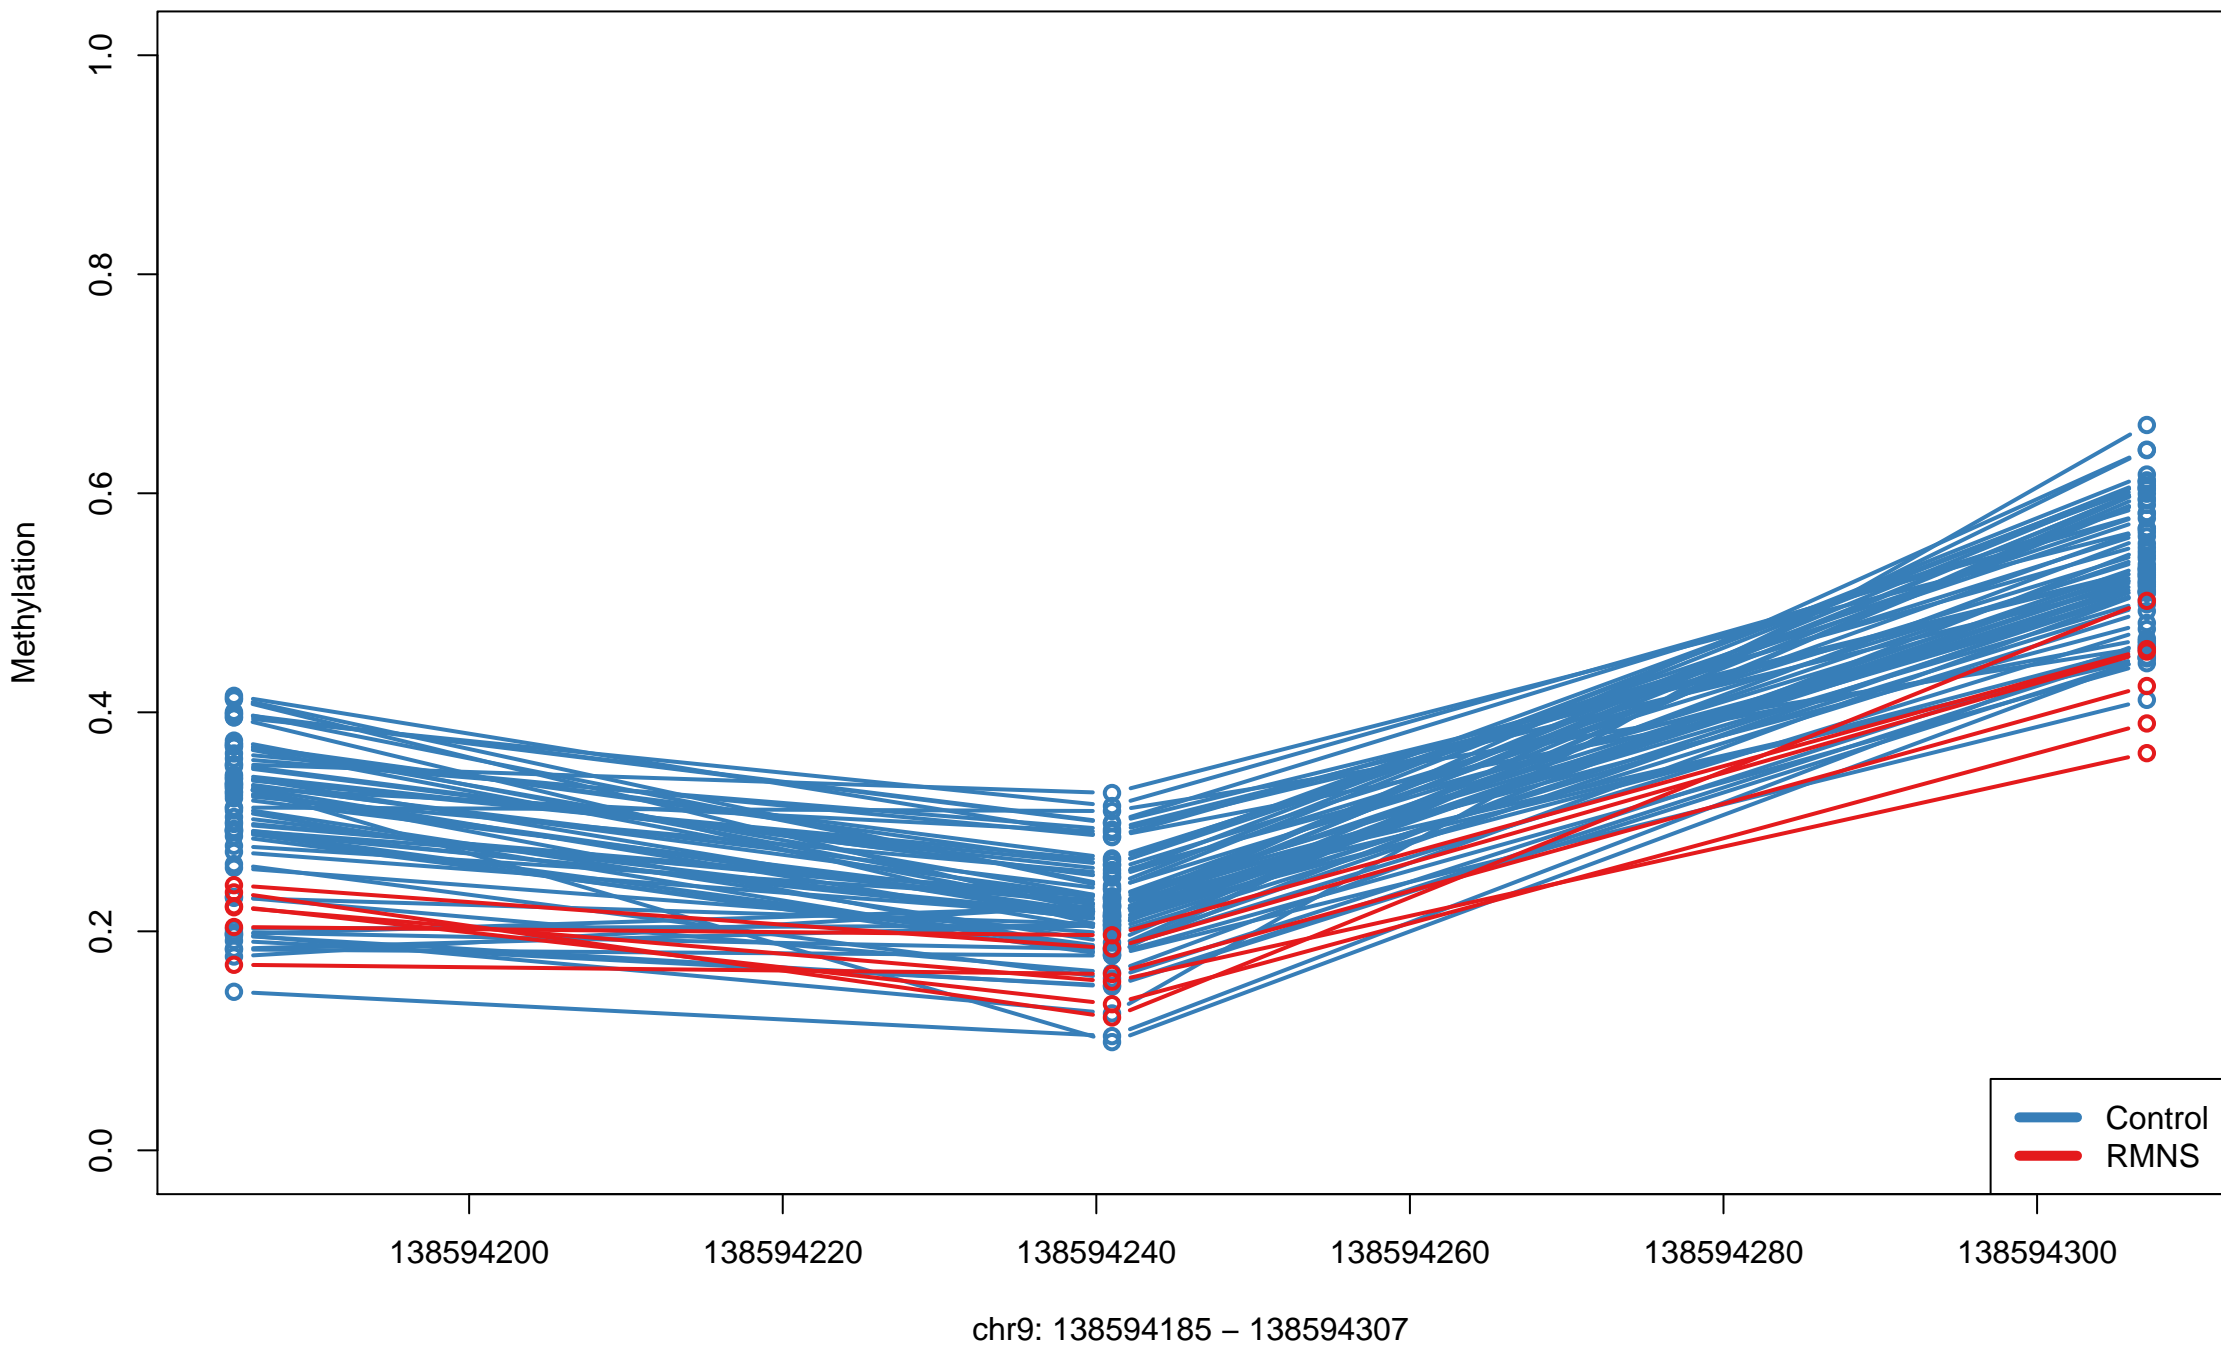

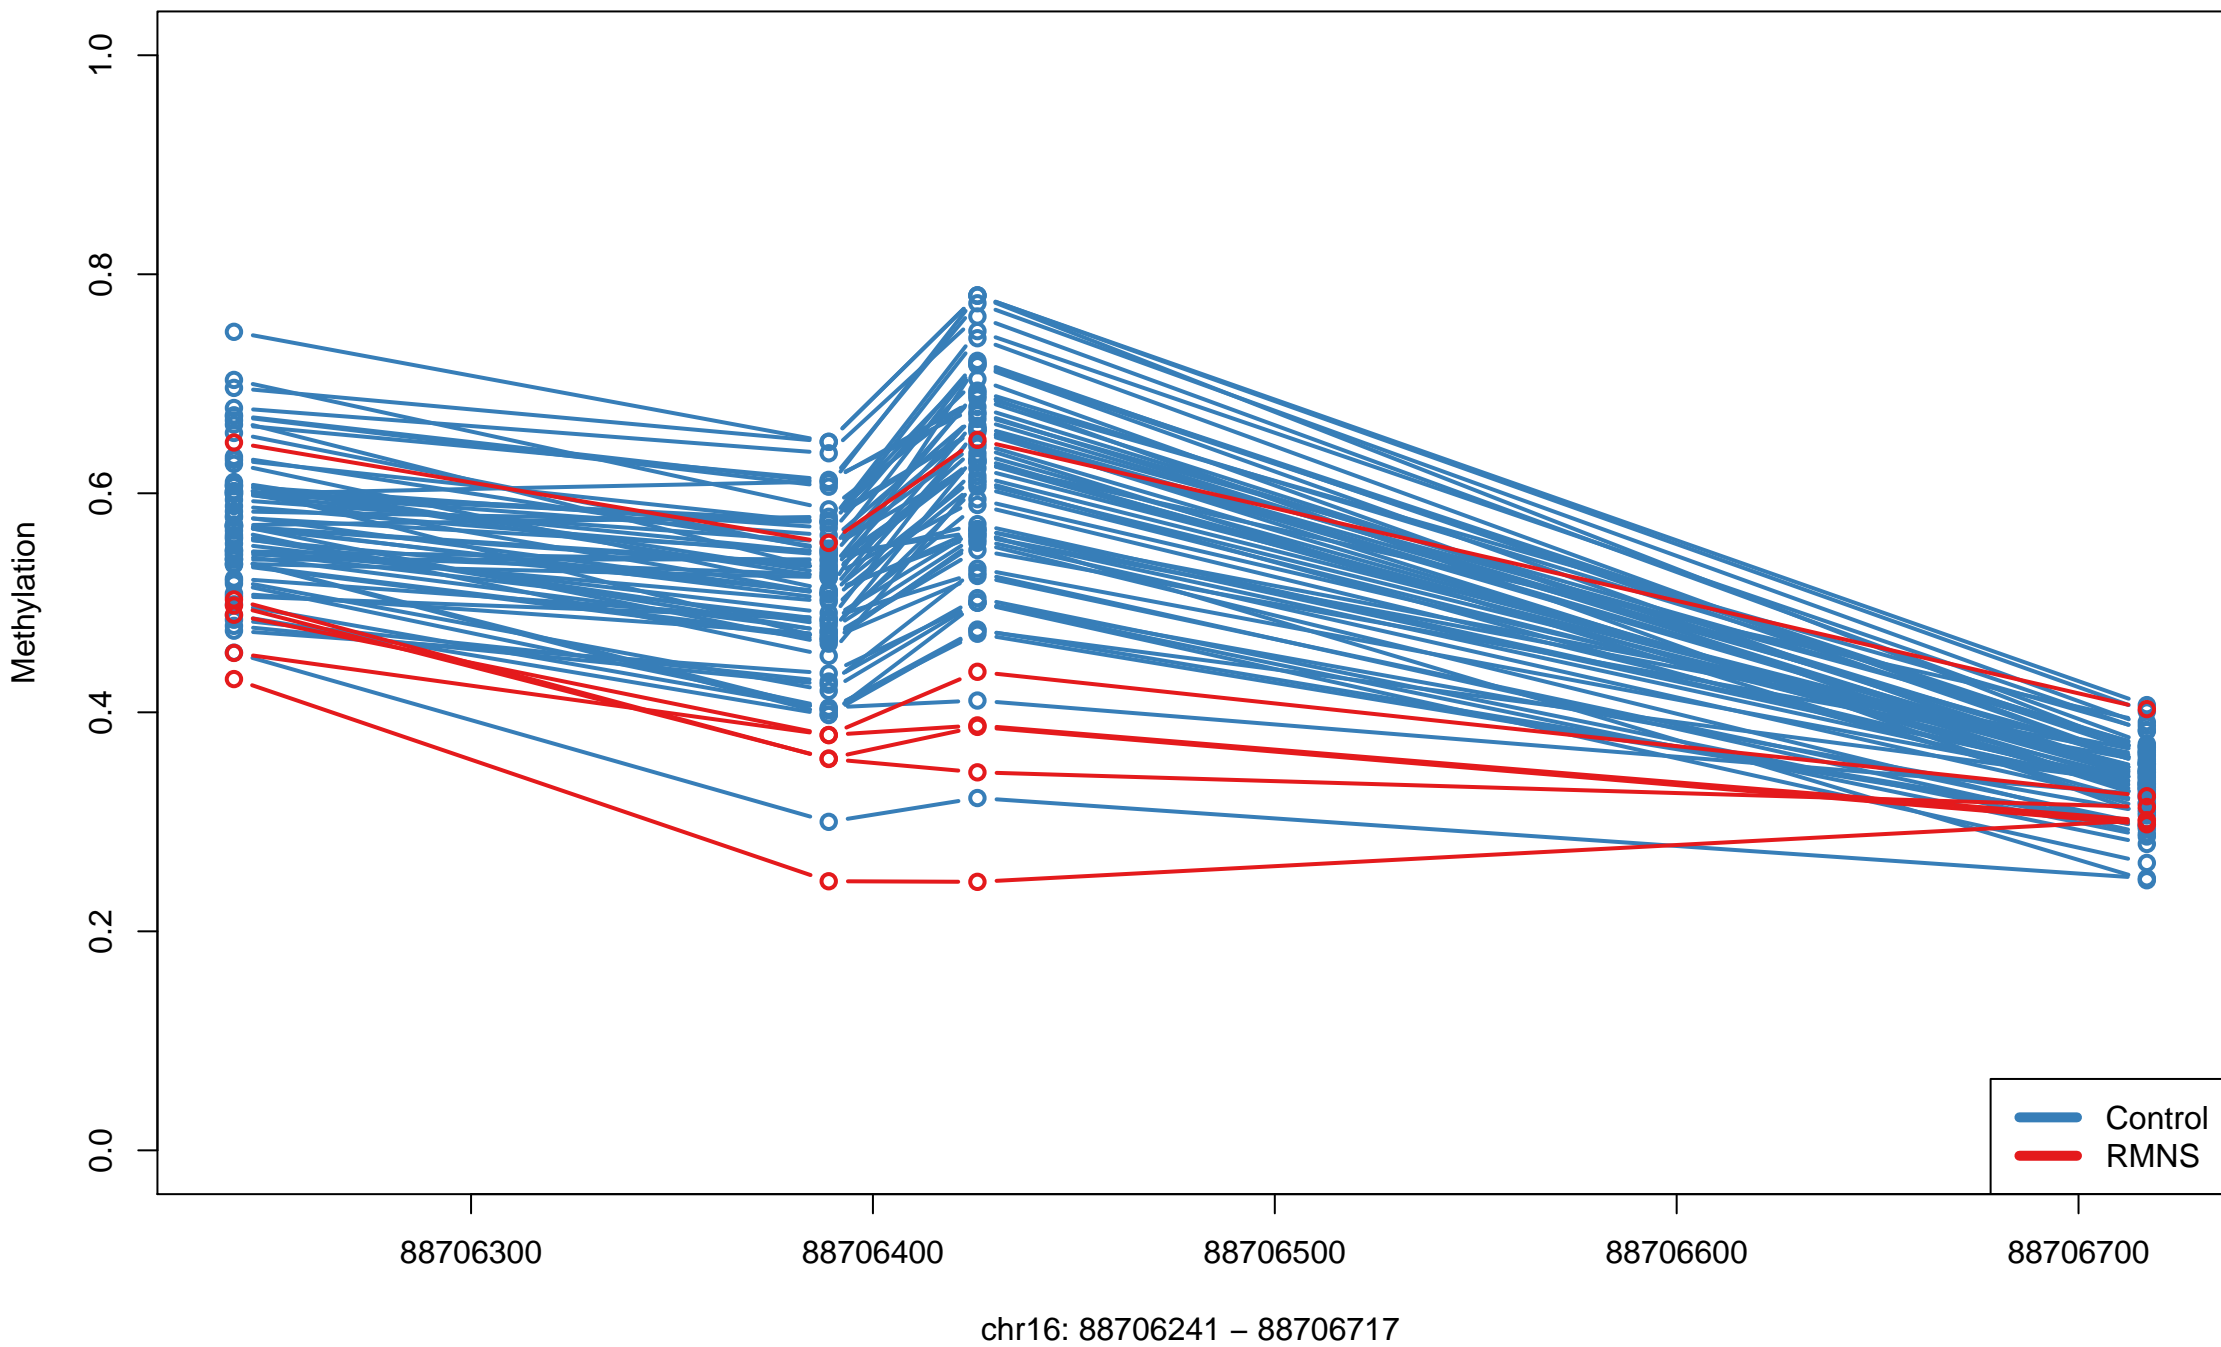

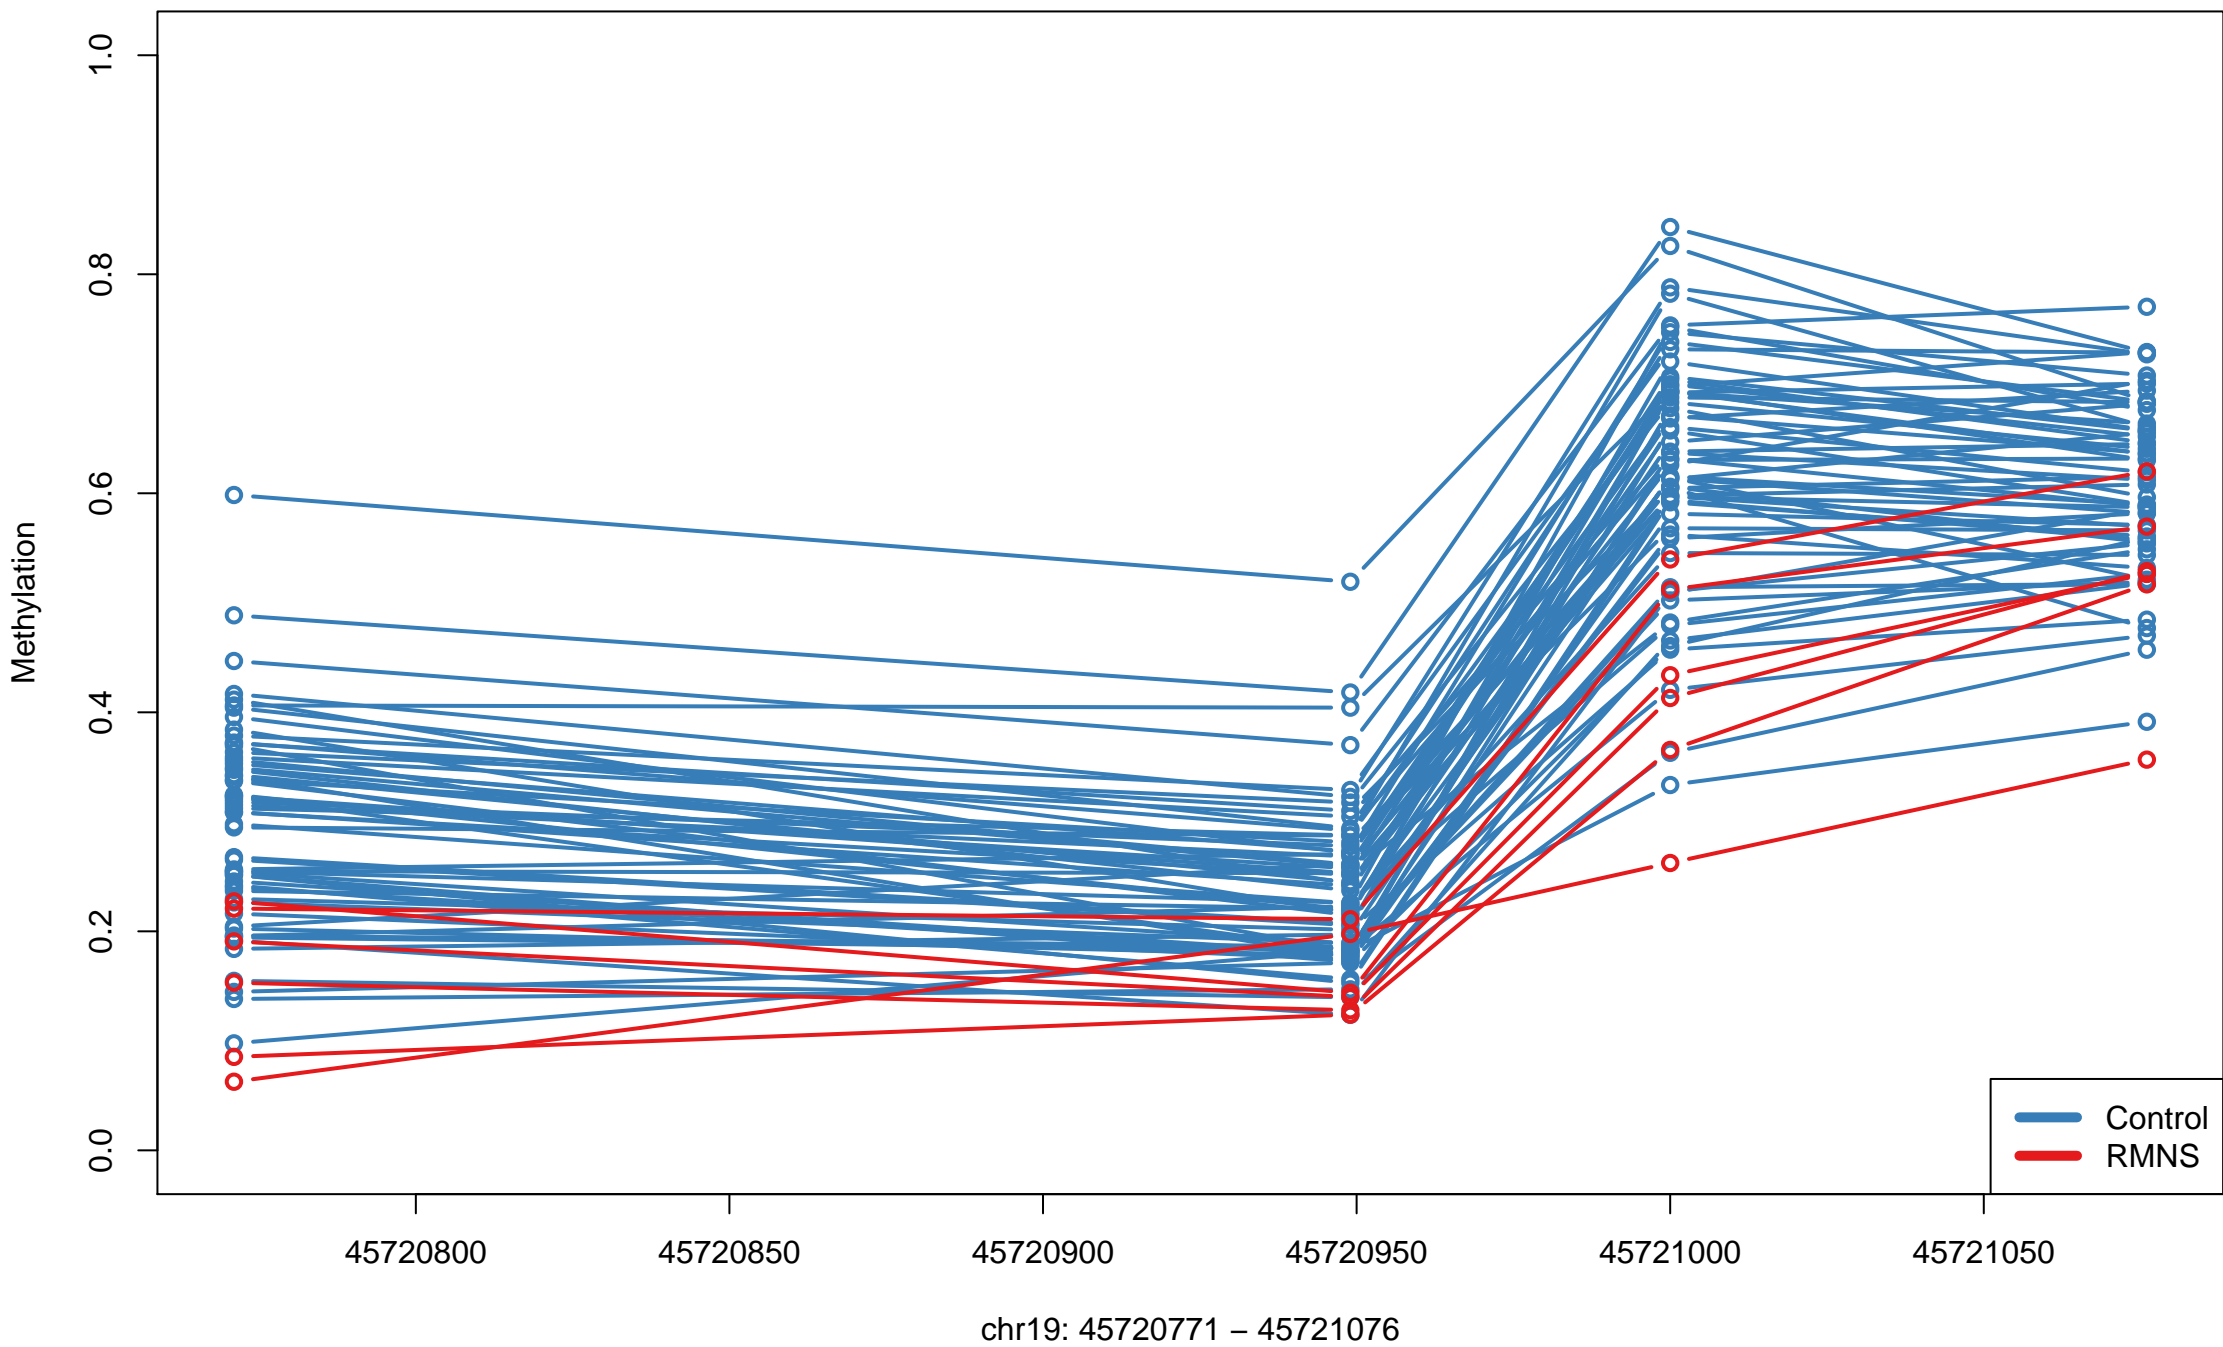

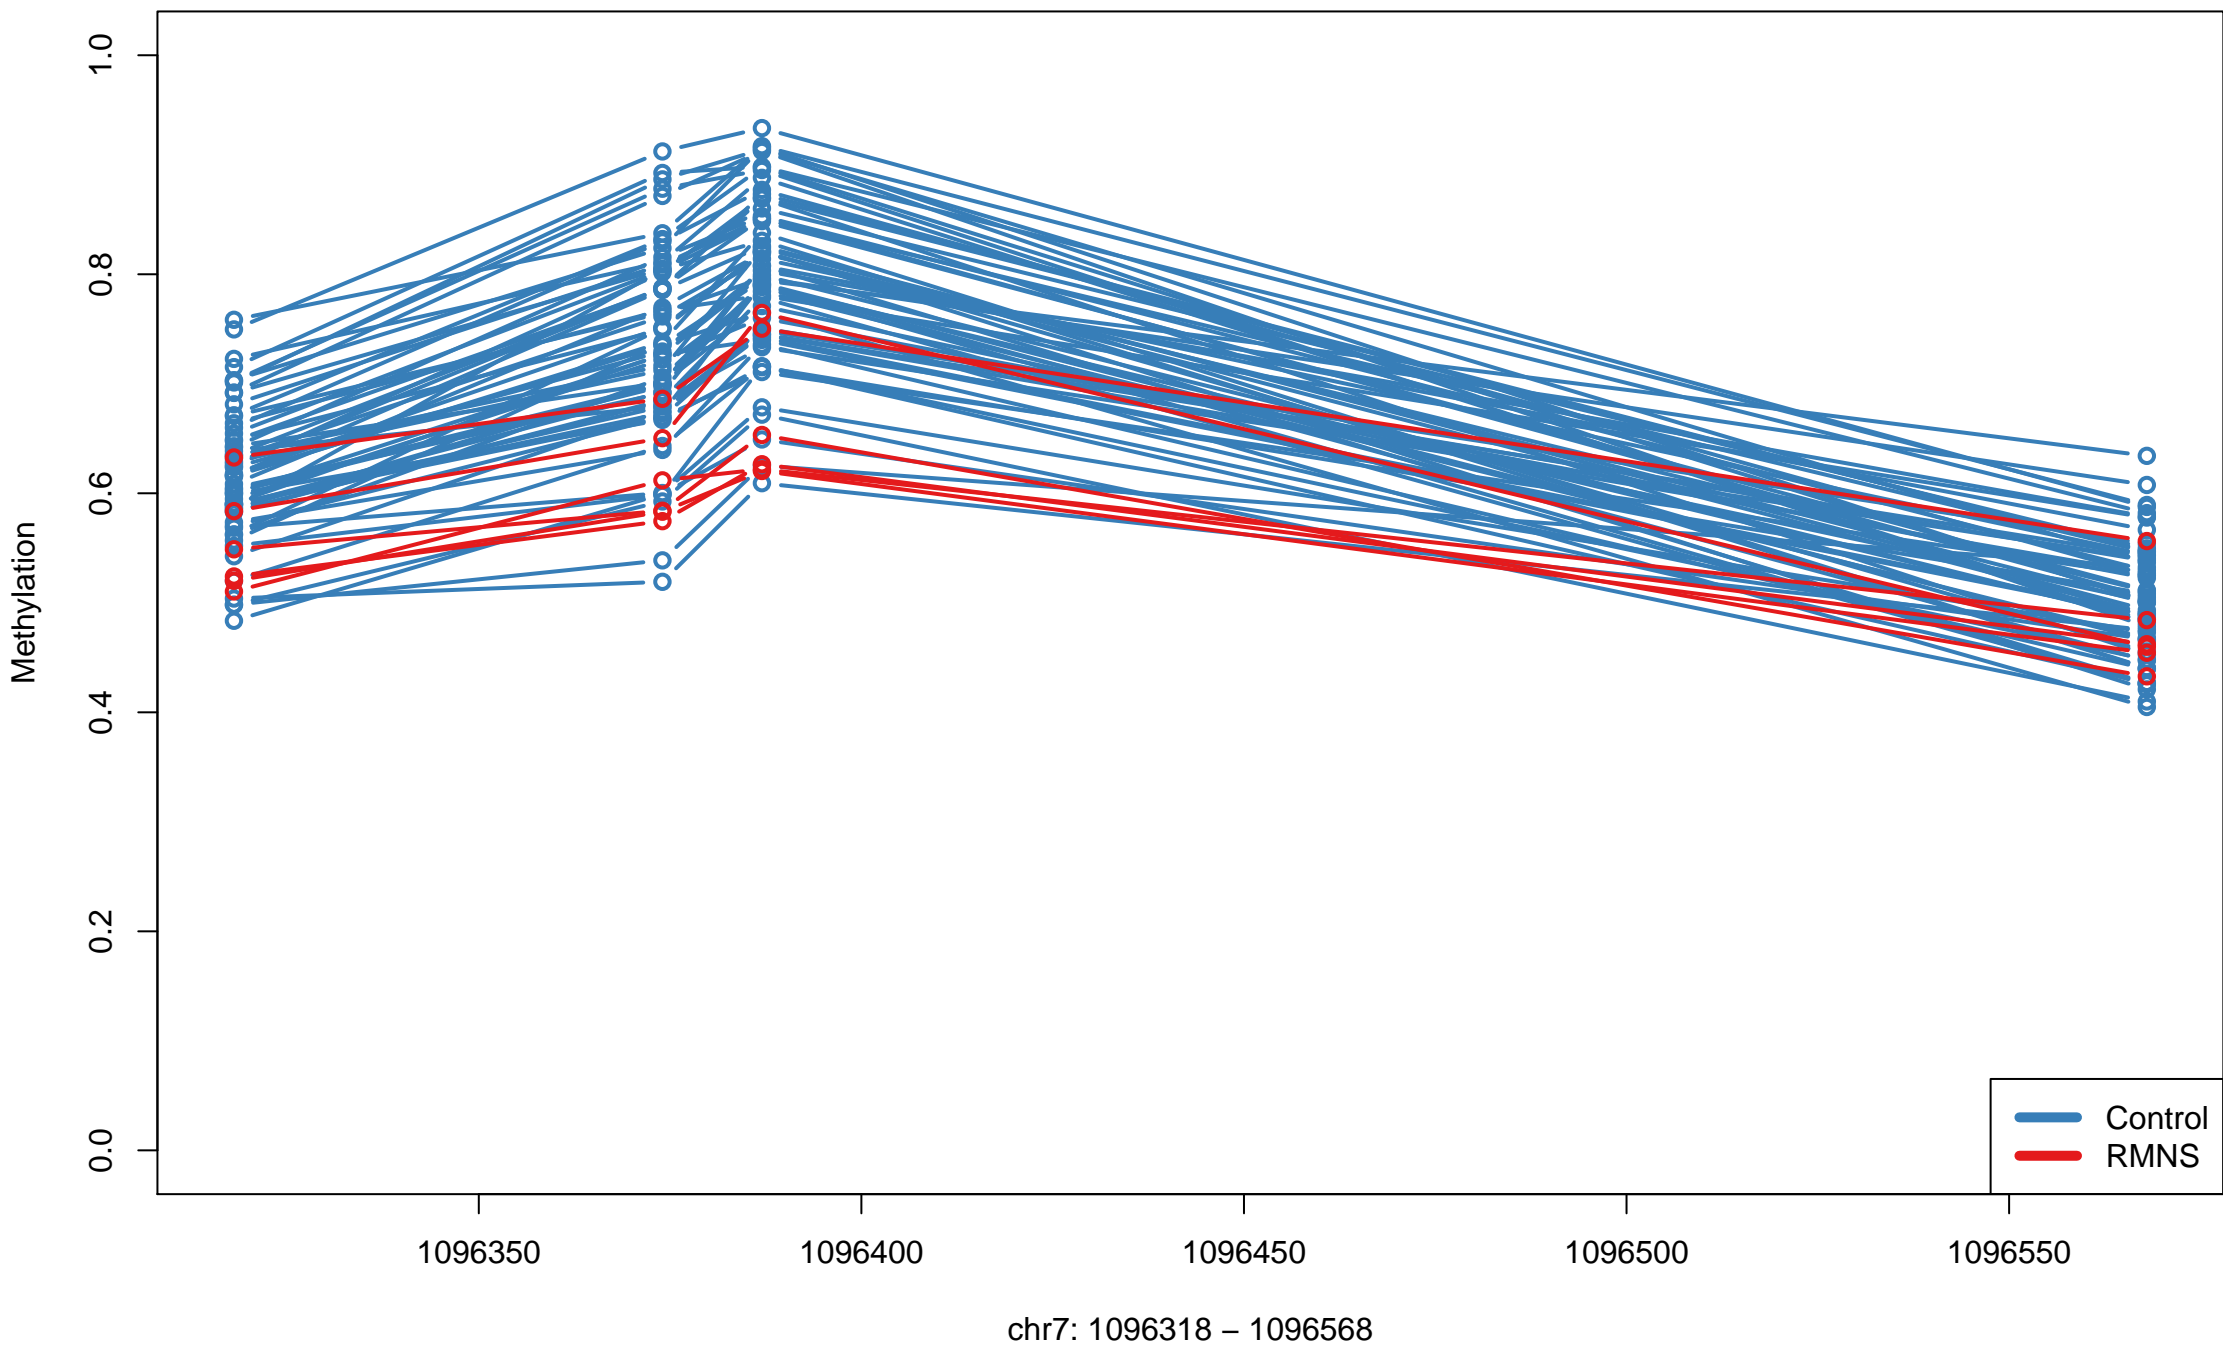



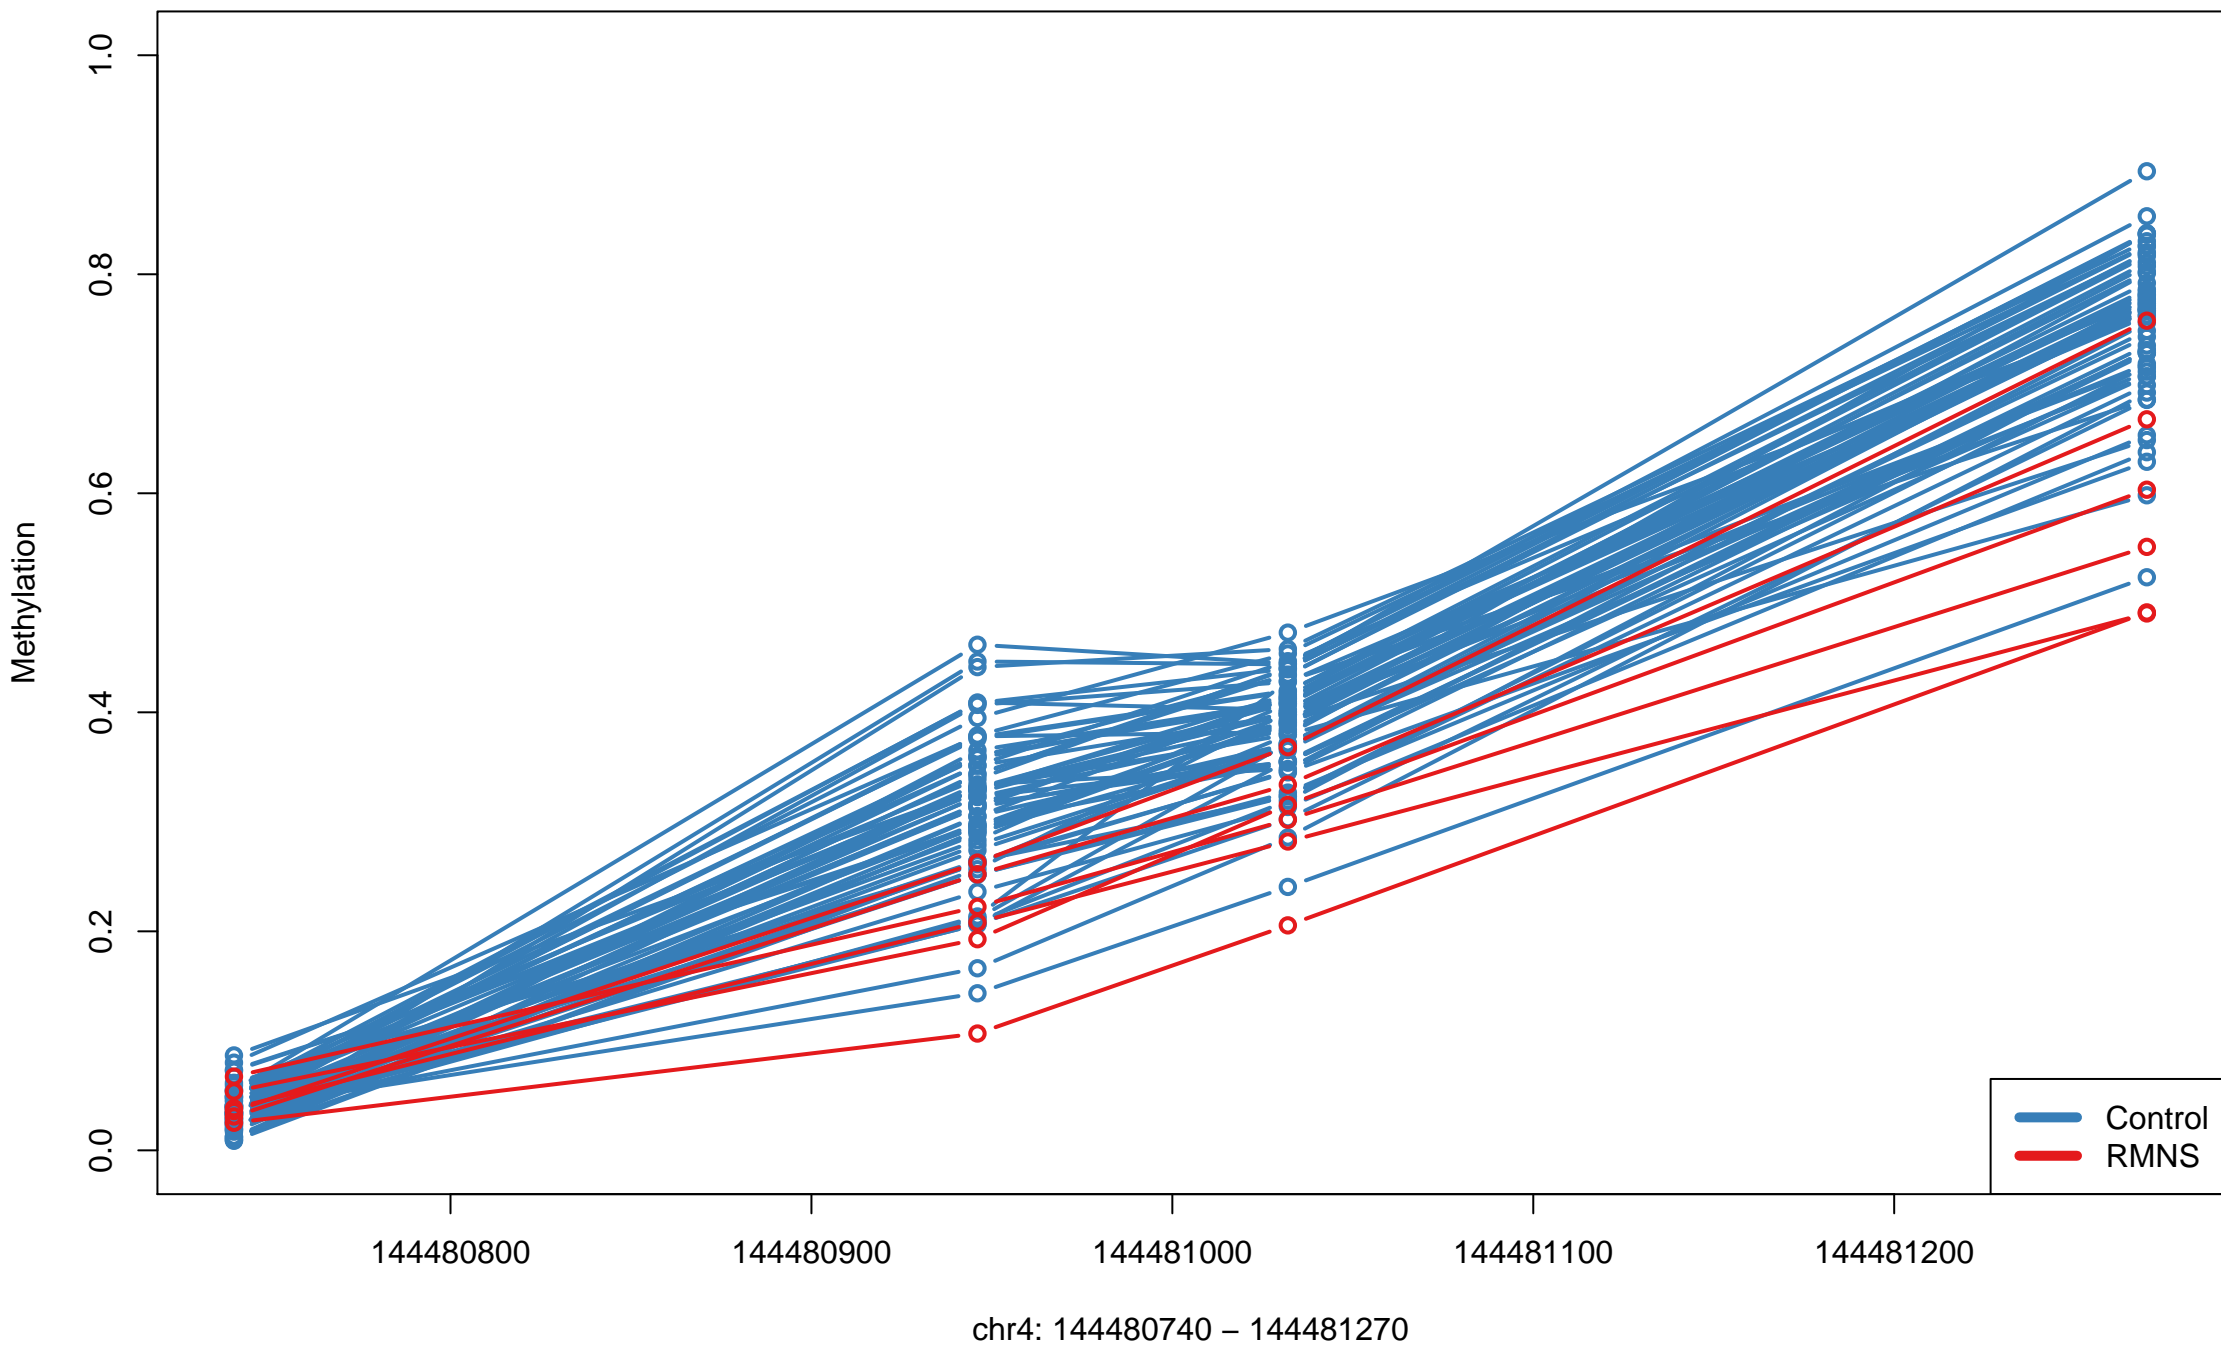



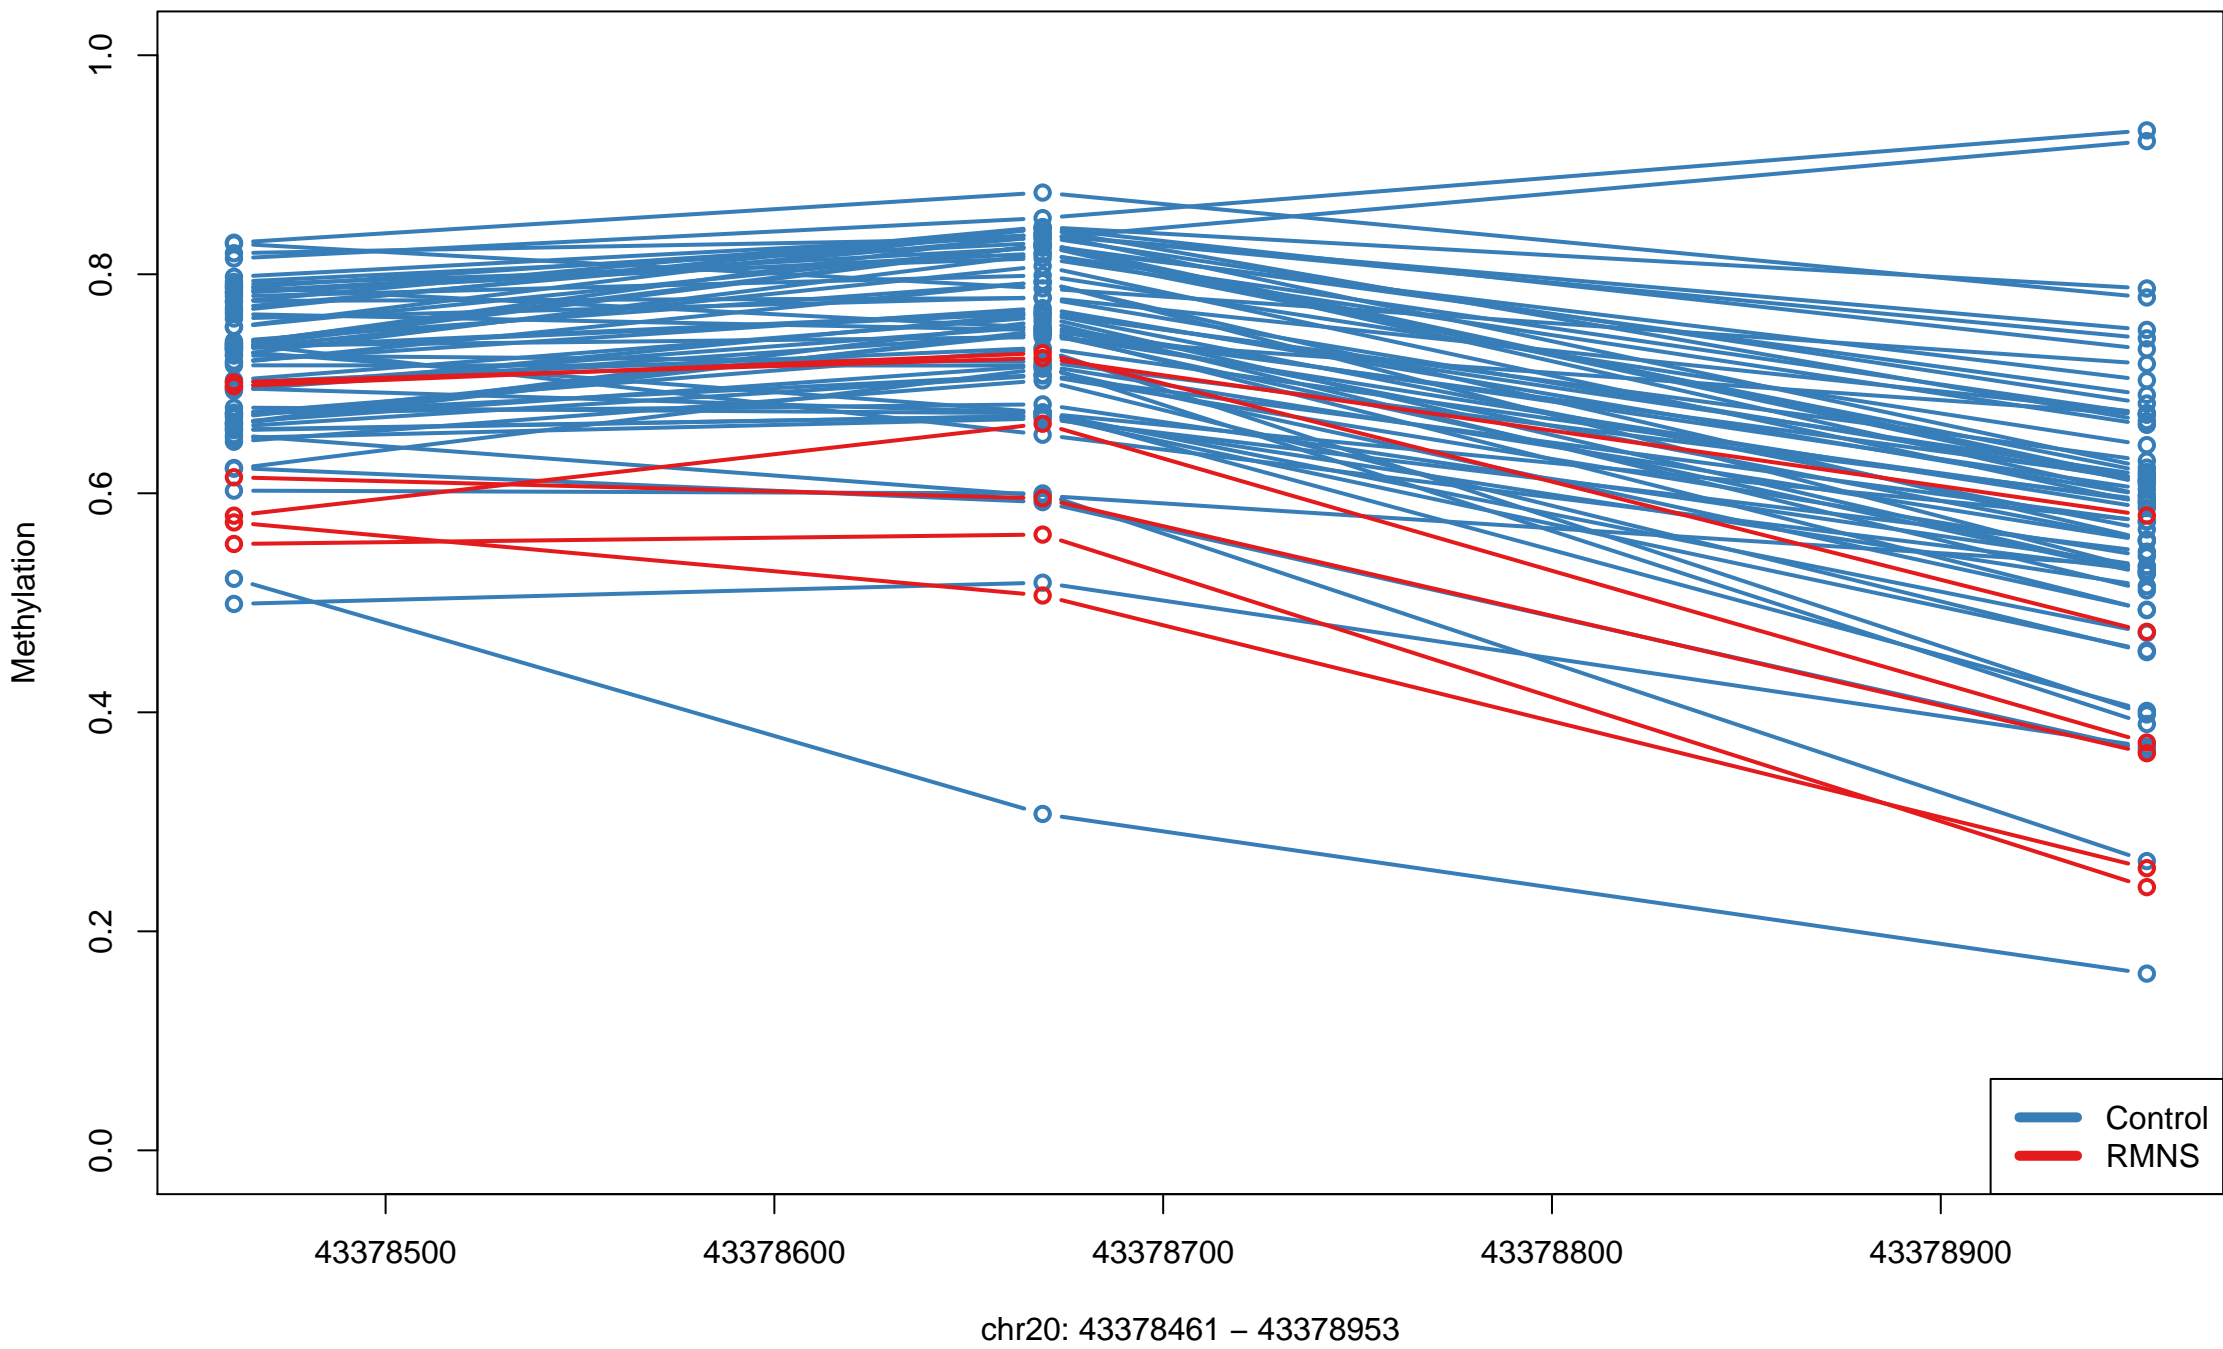

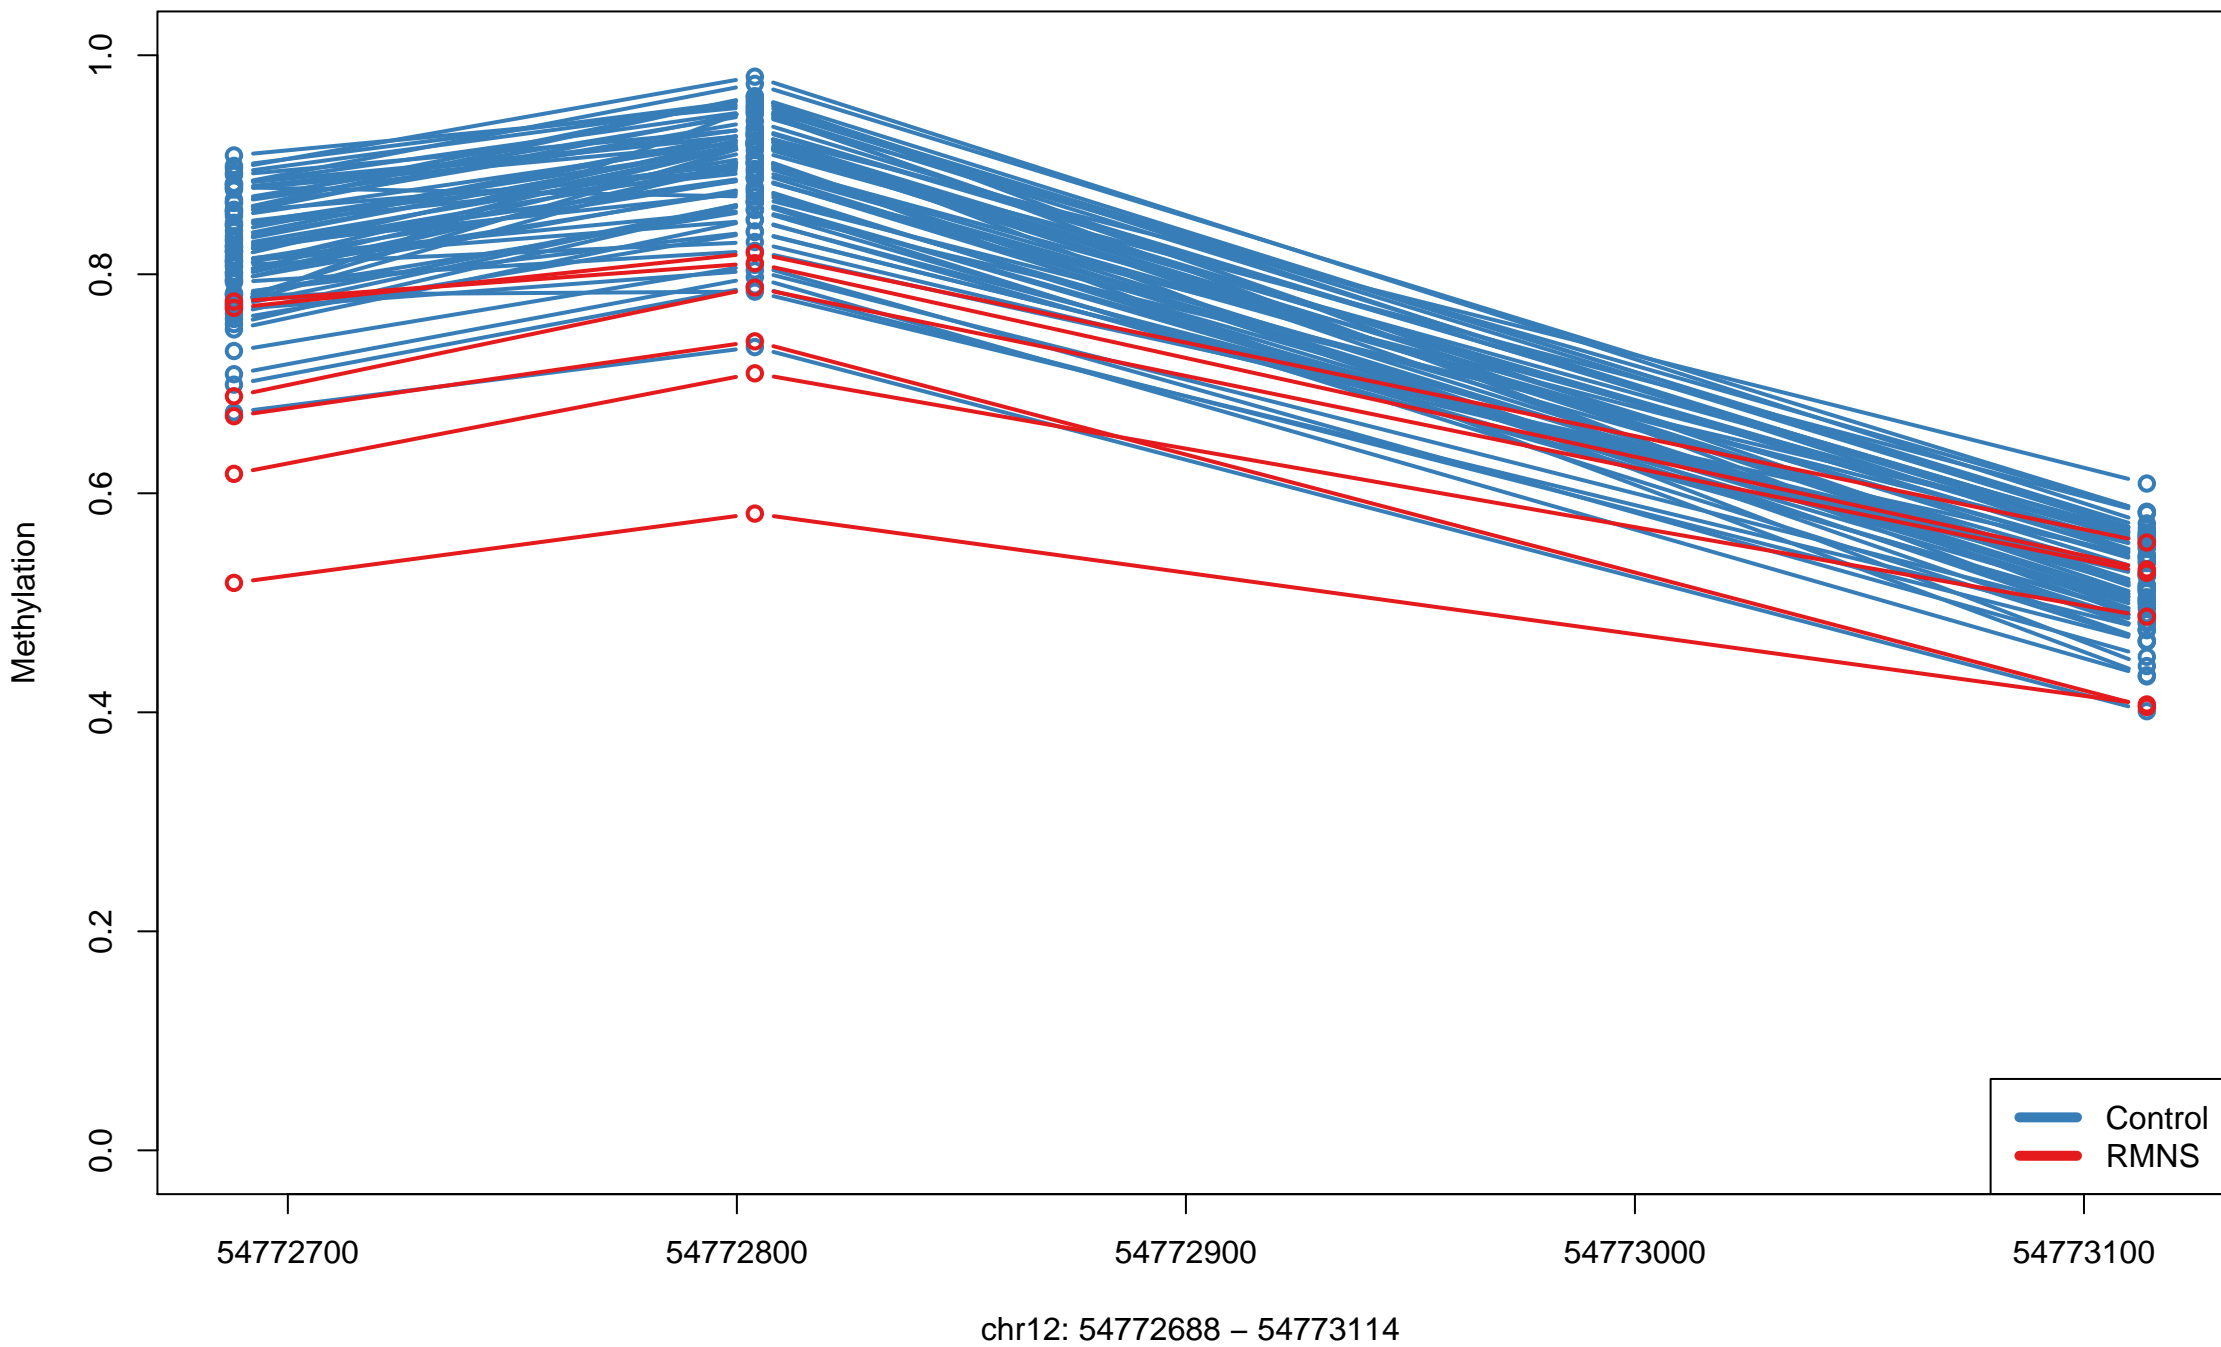

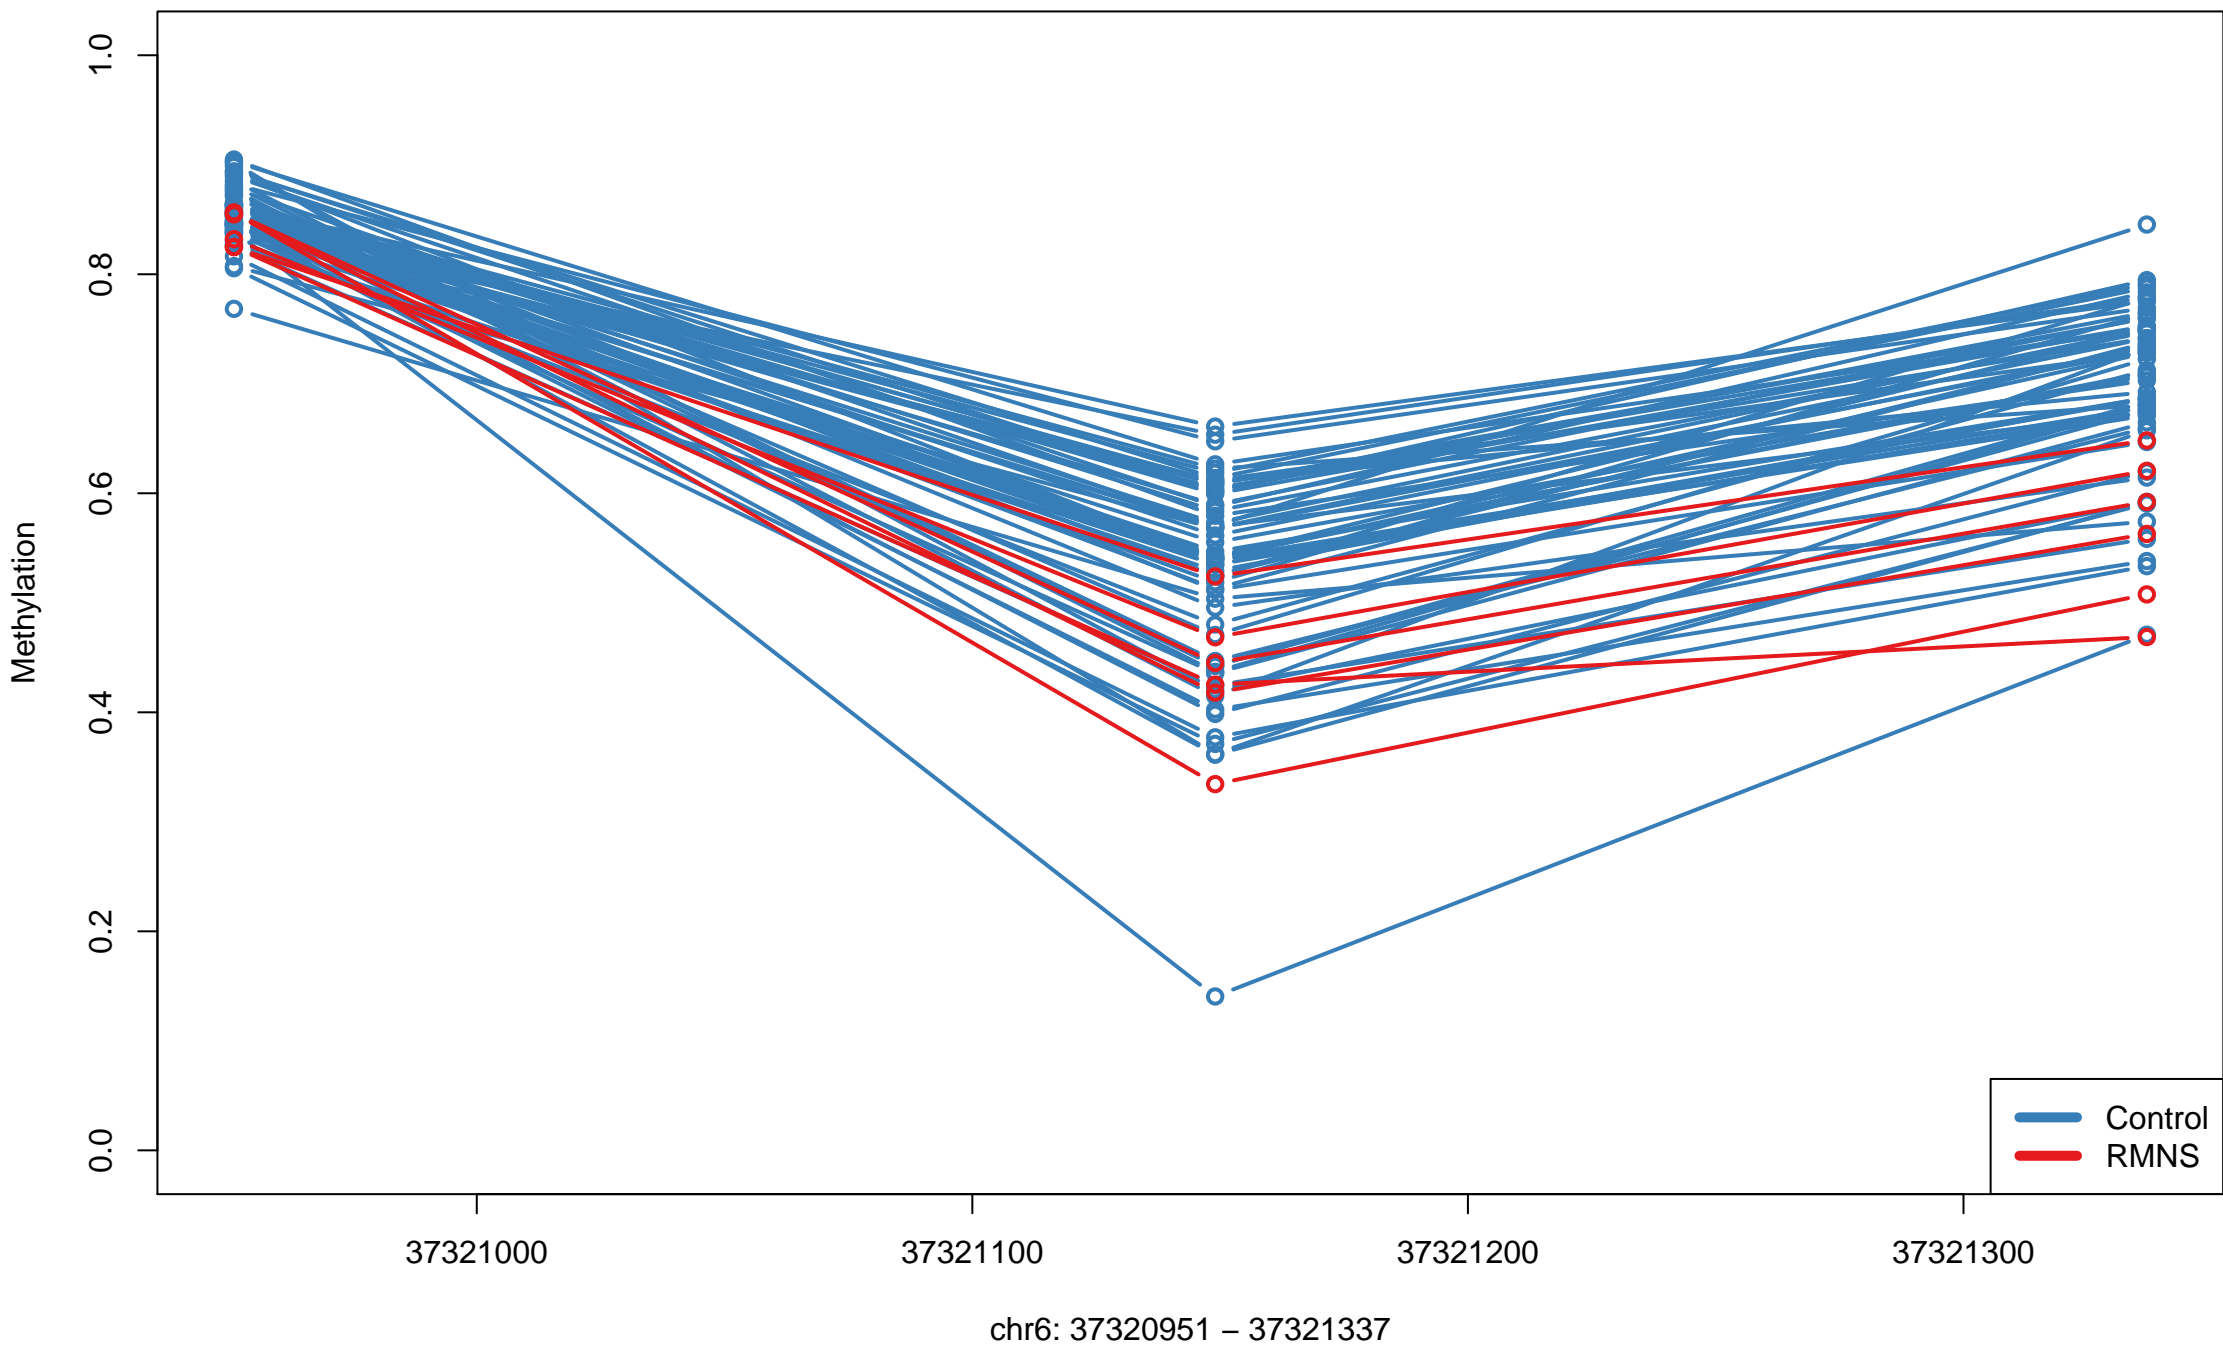

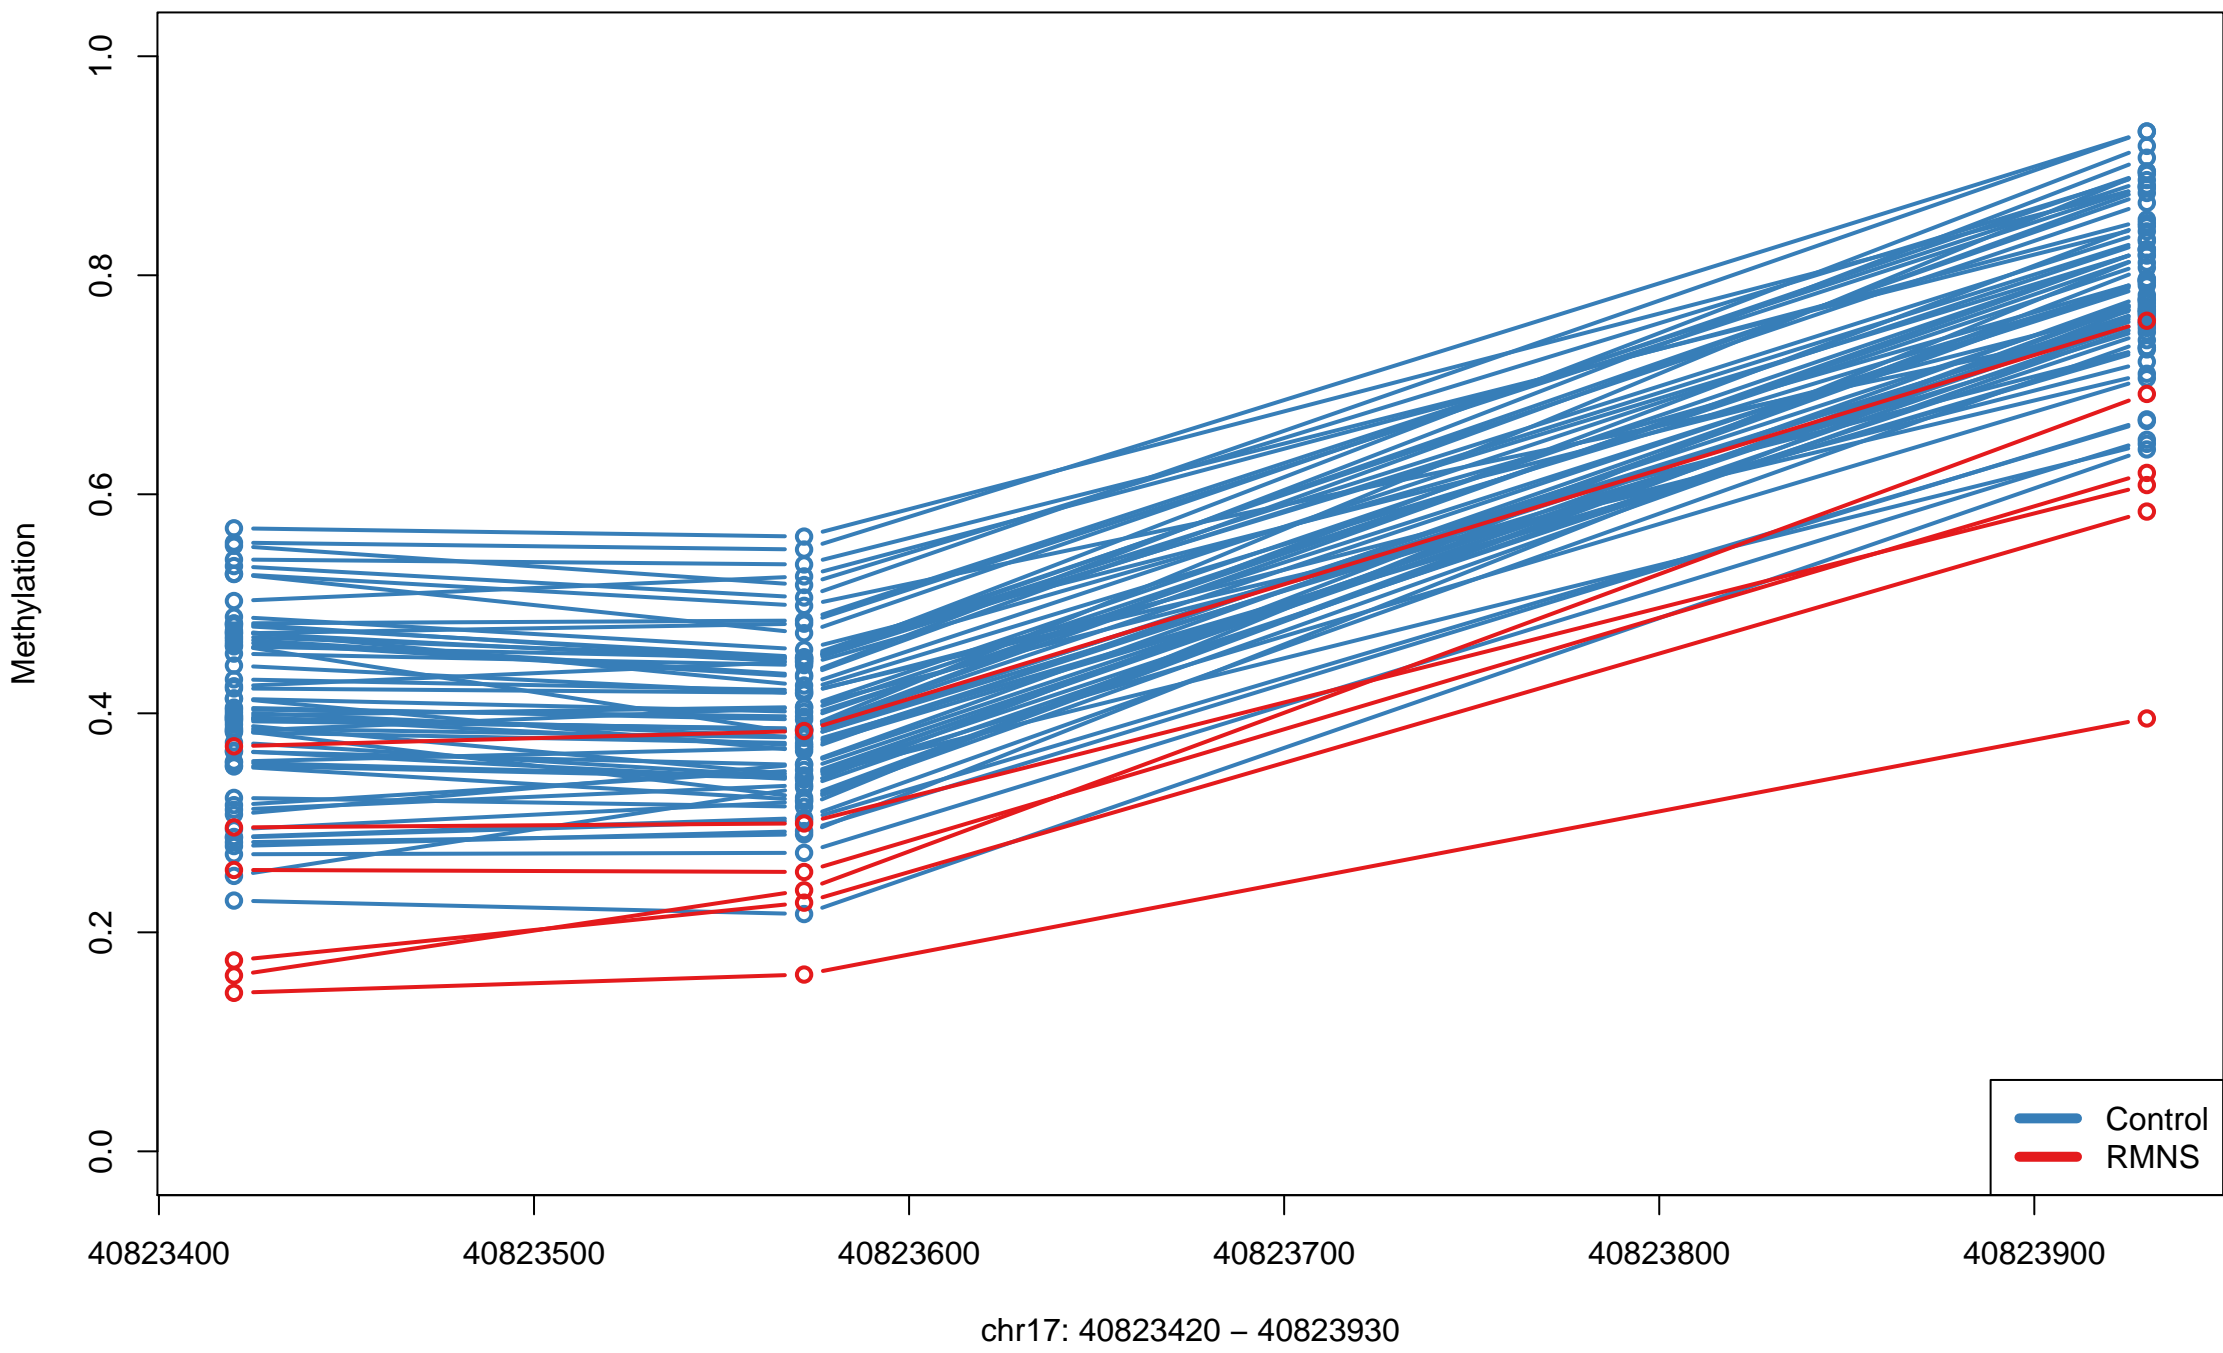

chr17: 40823420 – 40823930

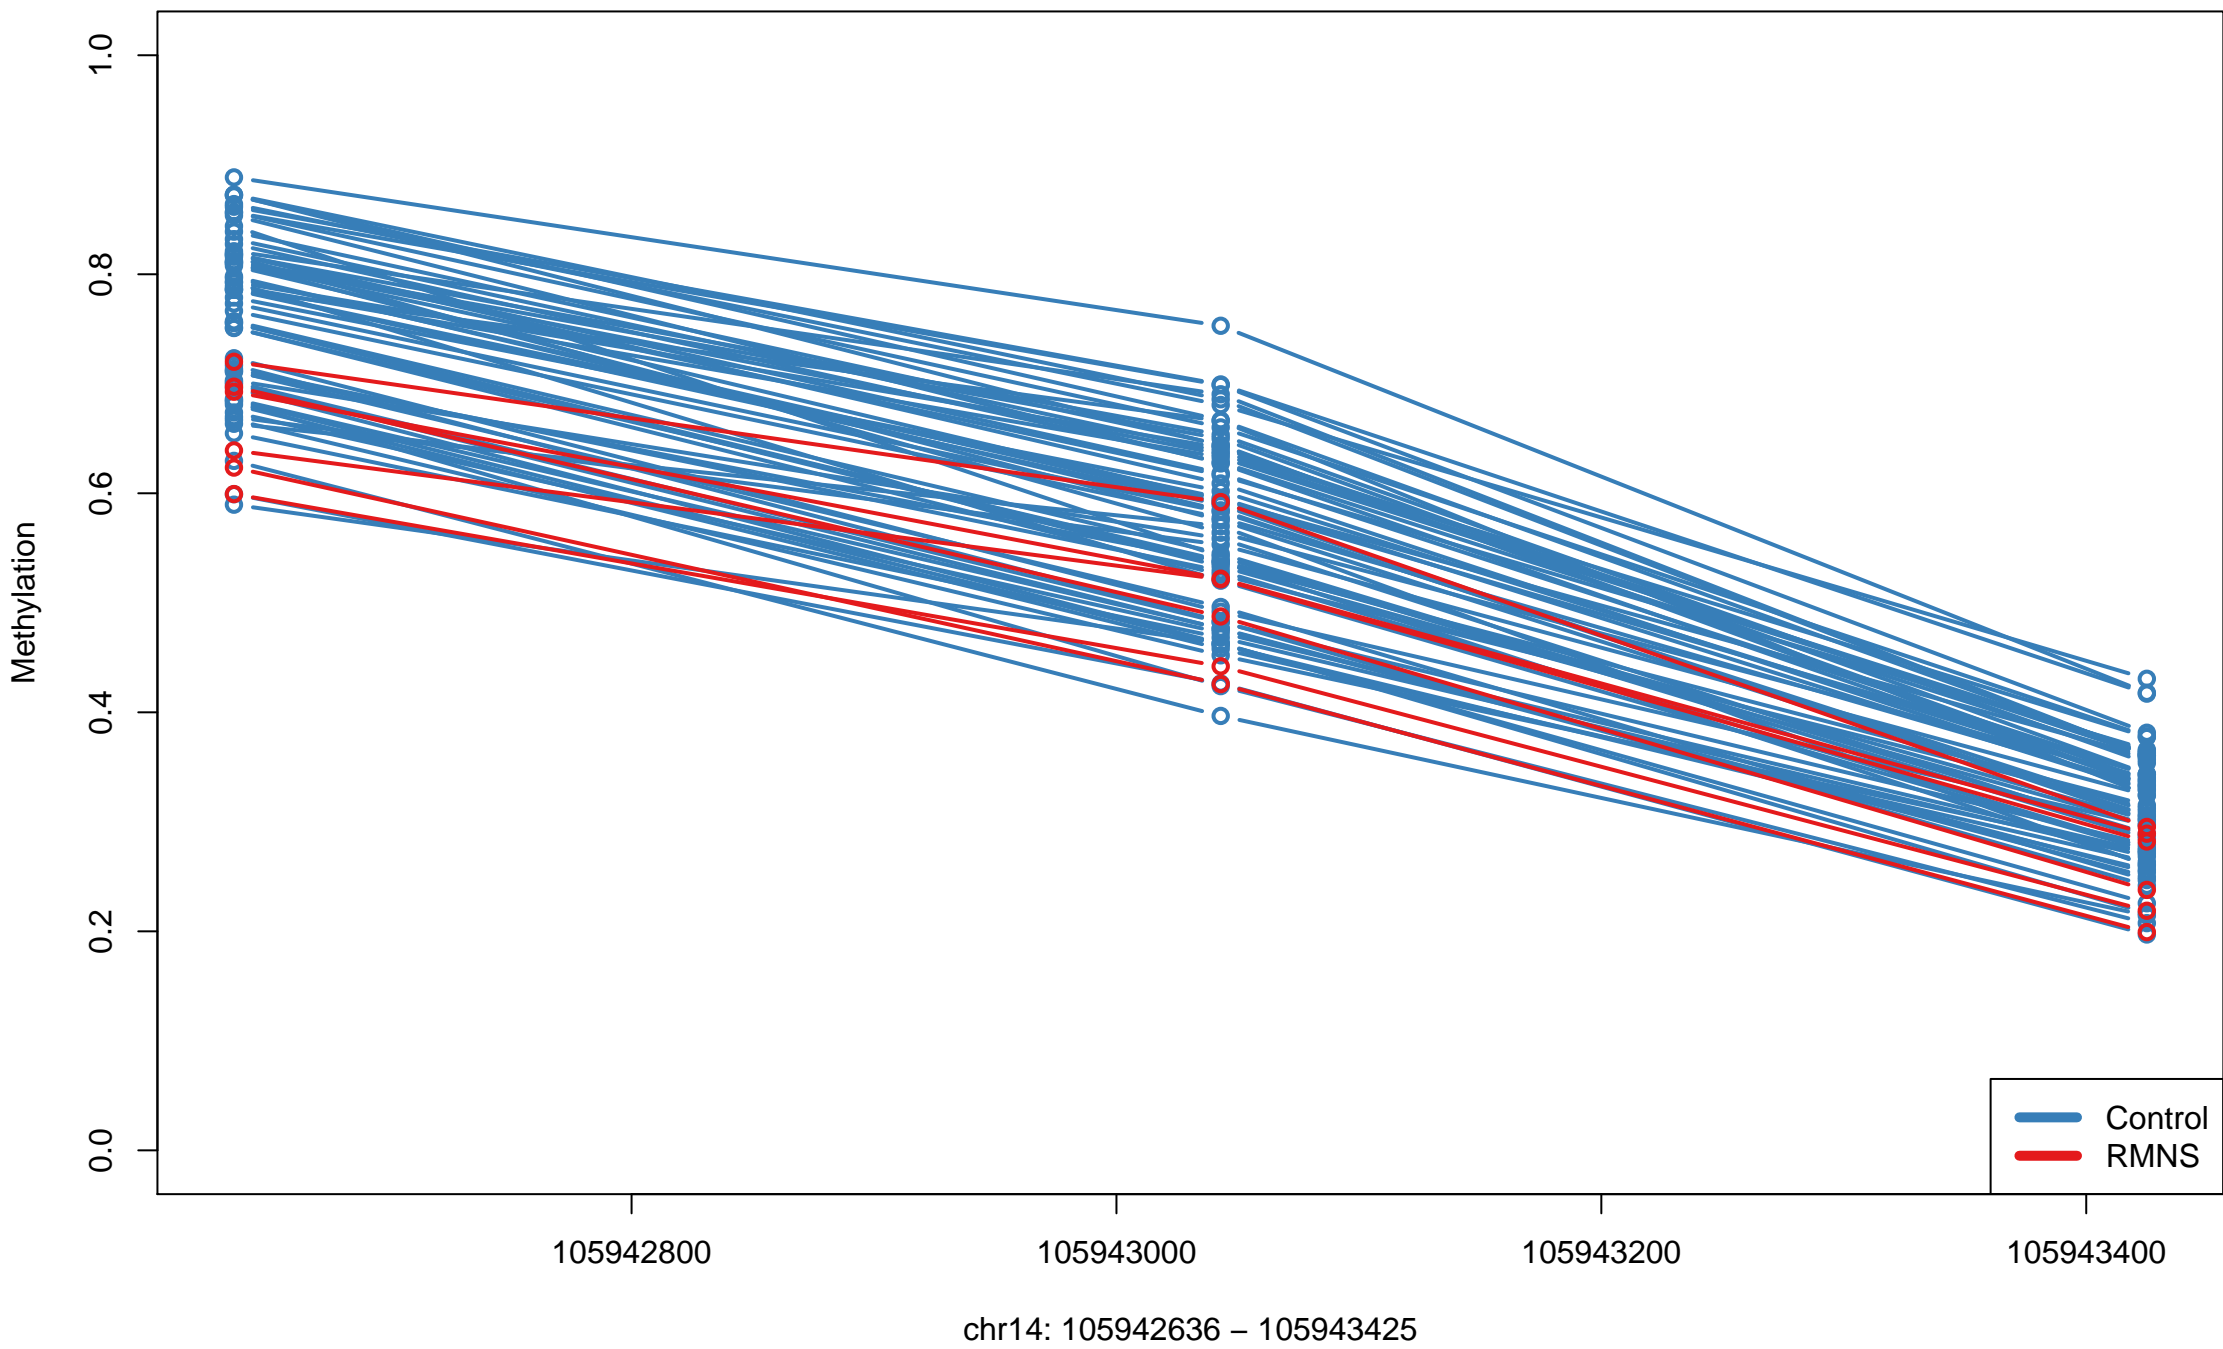

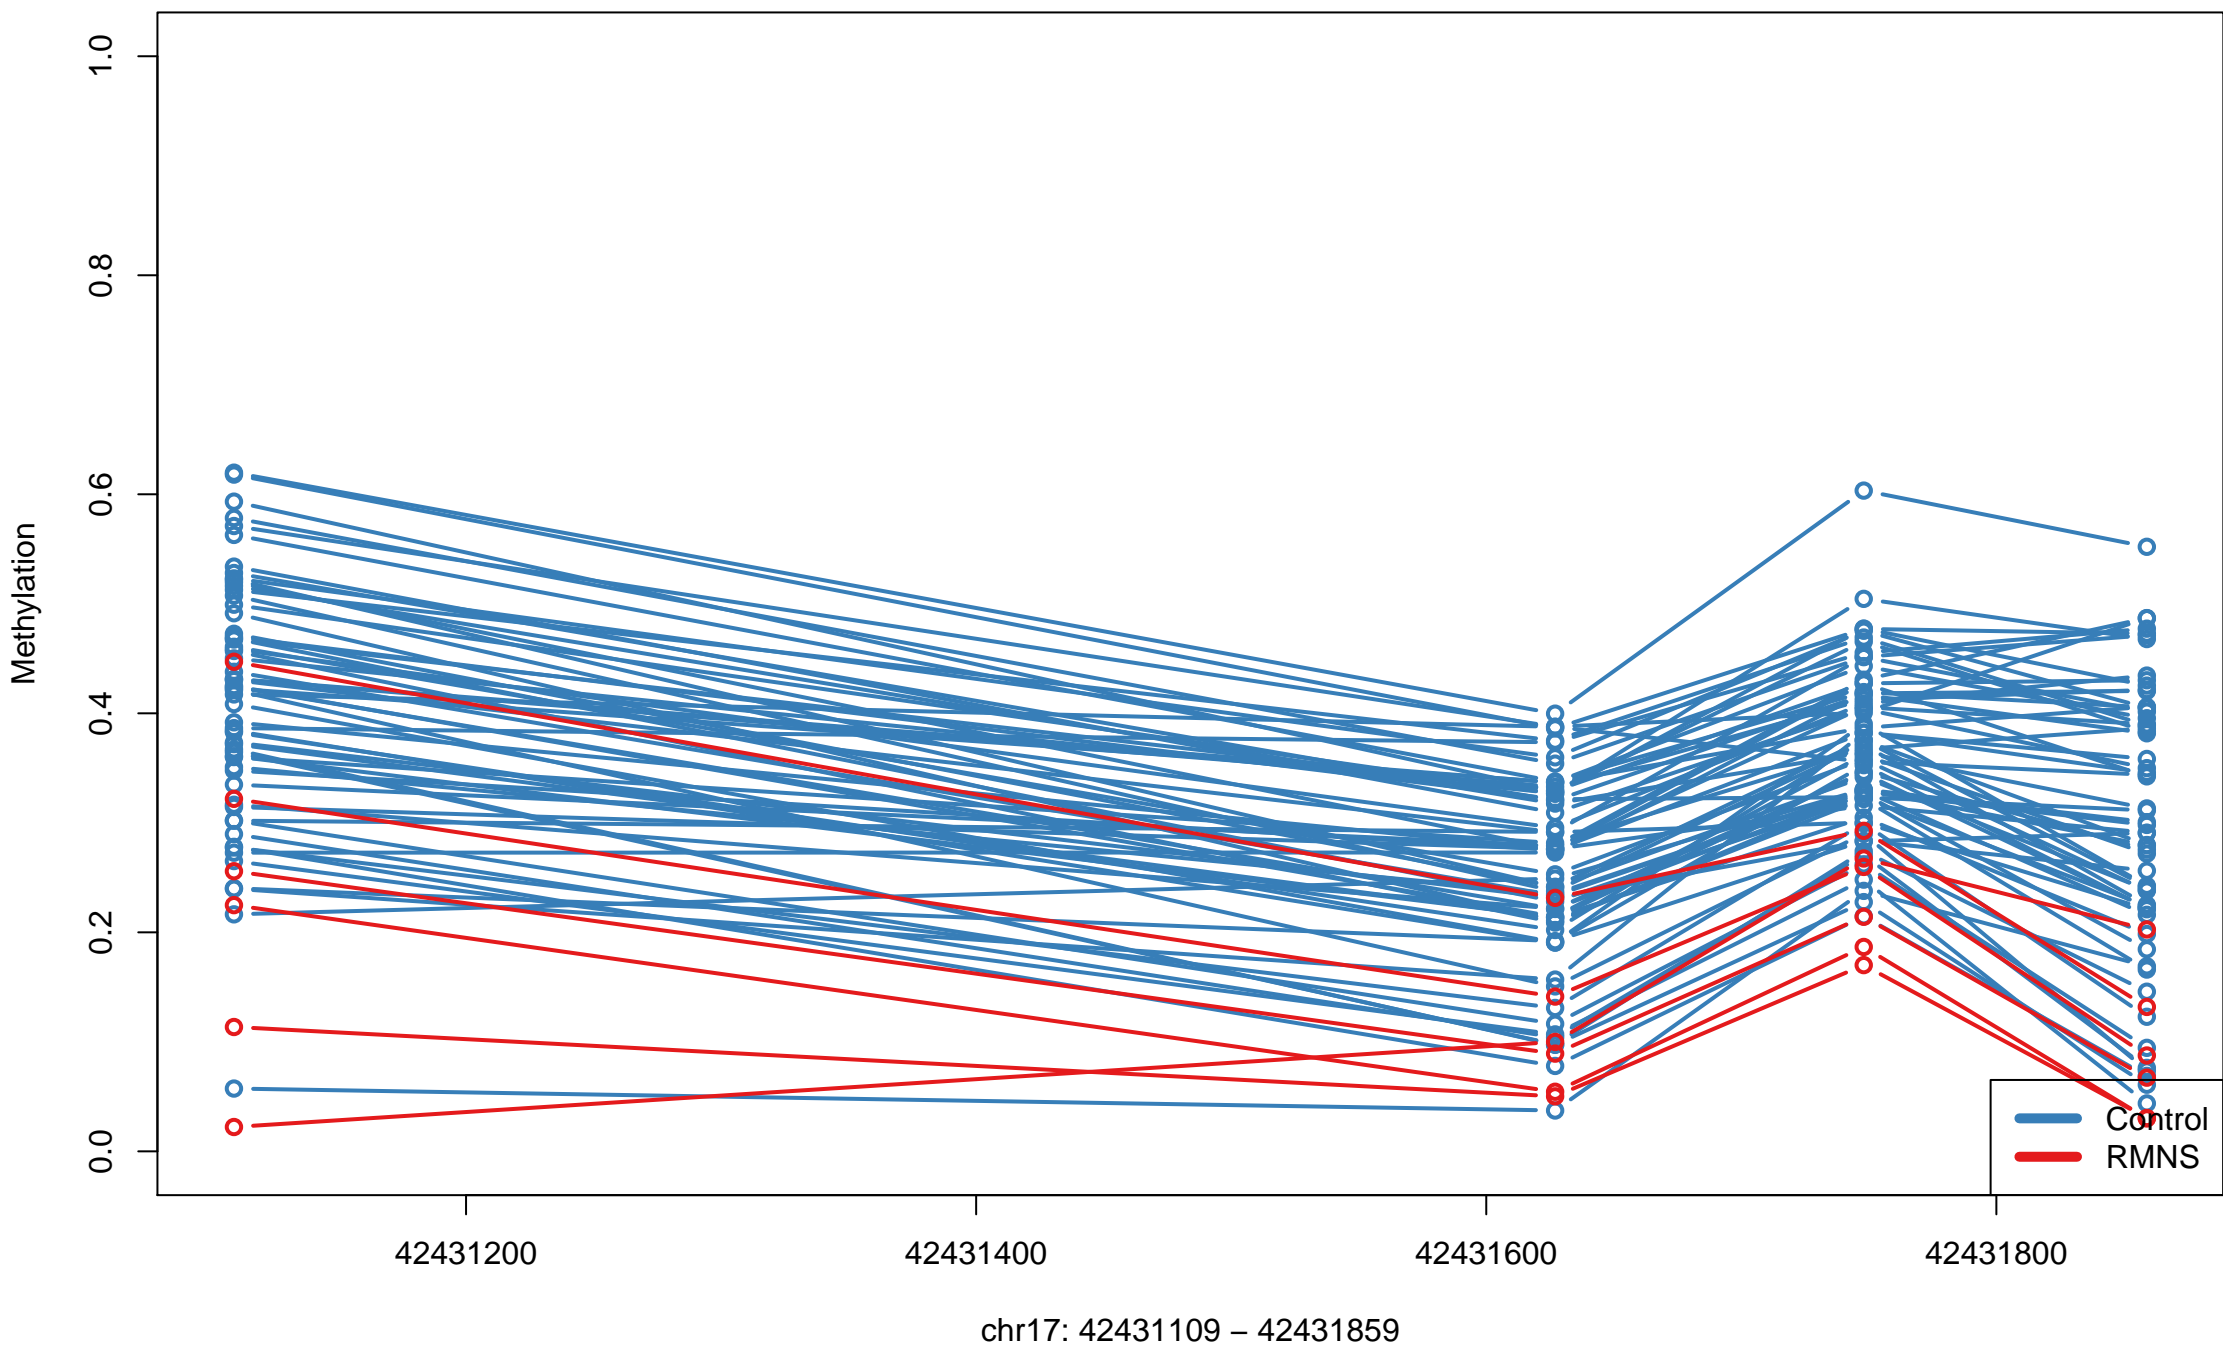



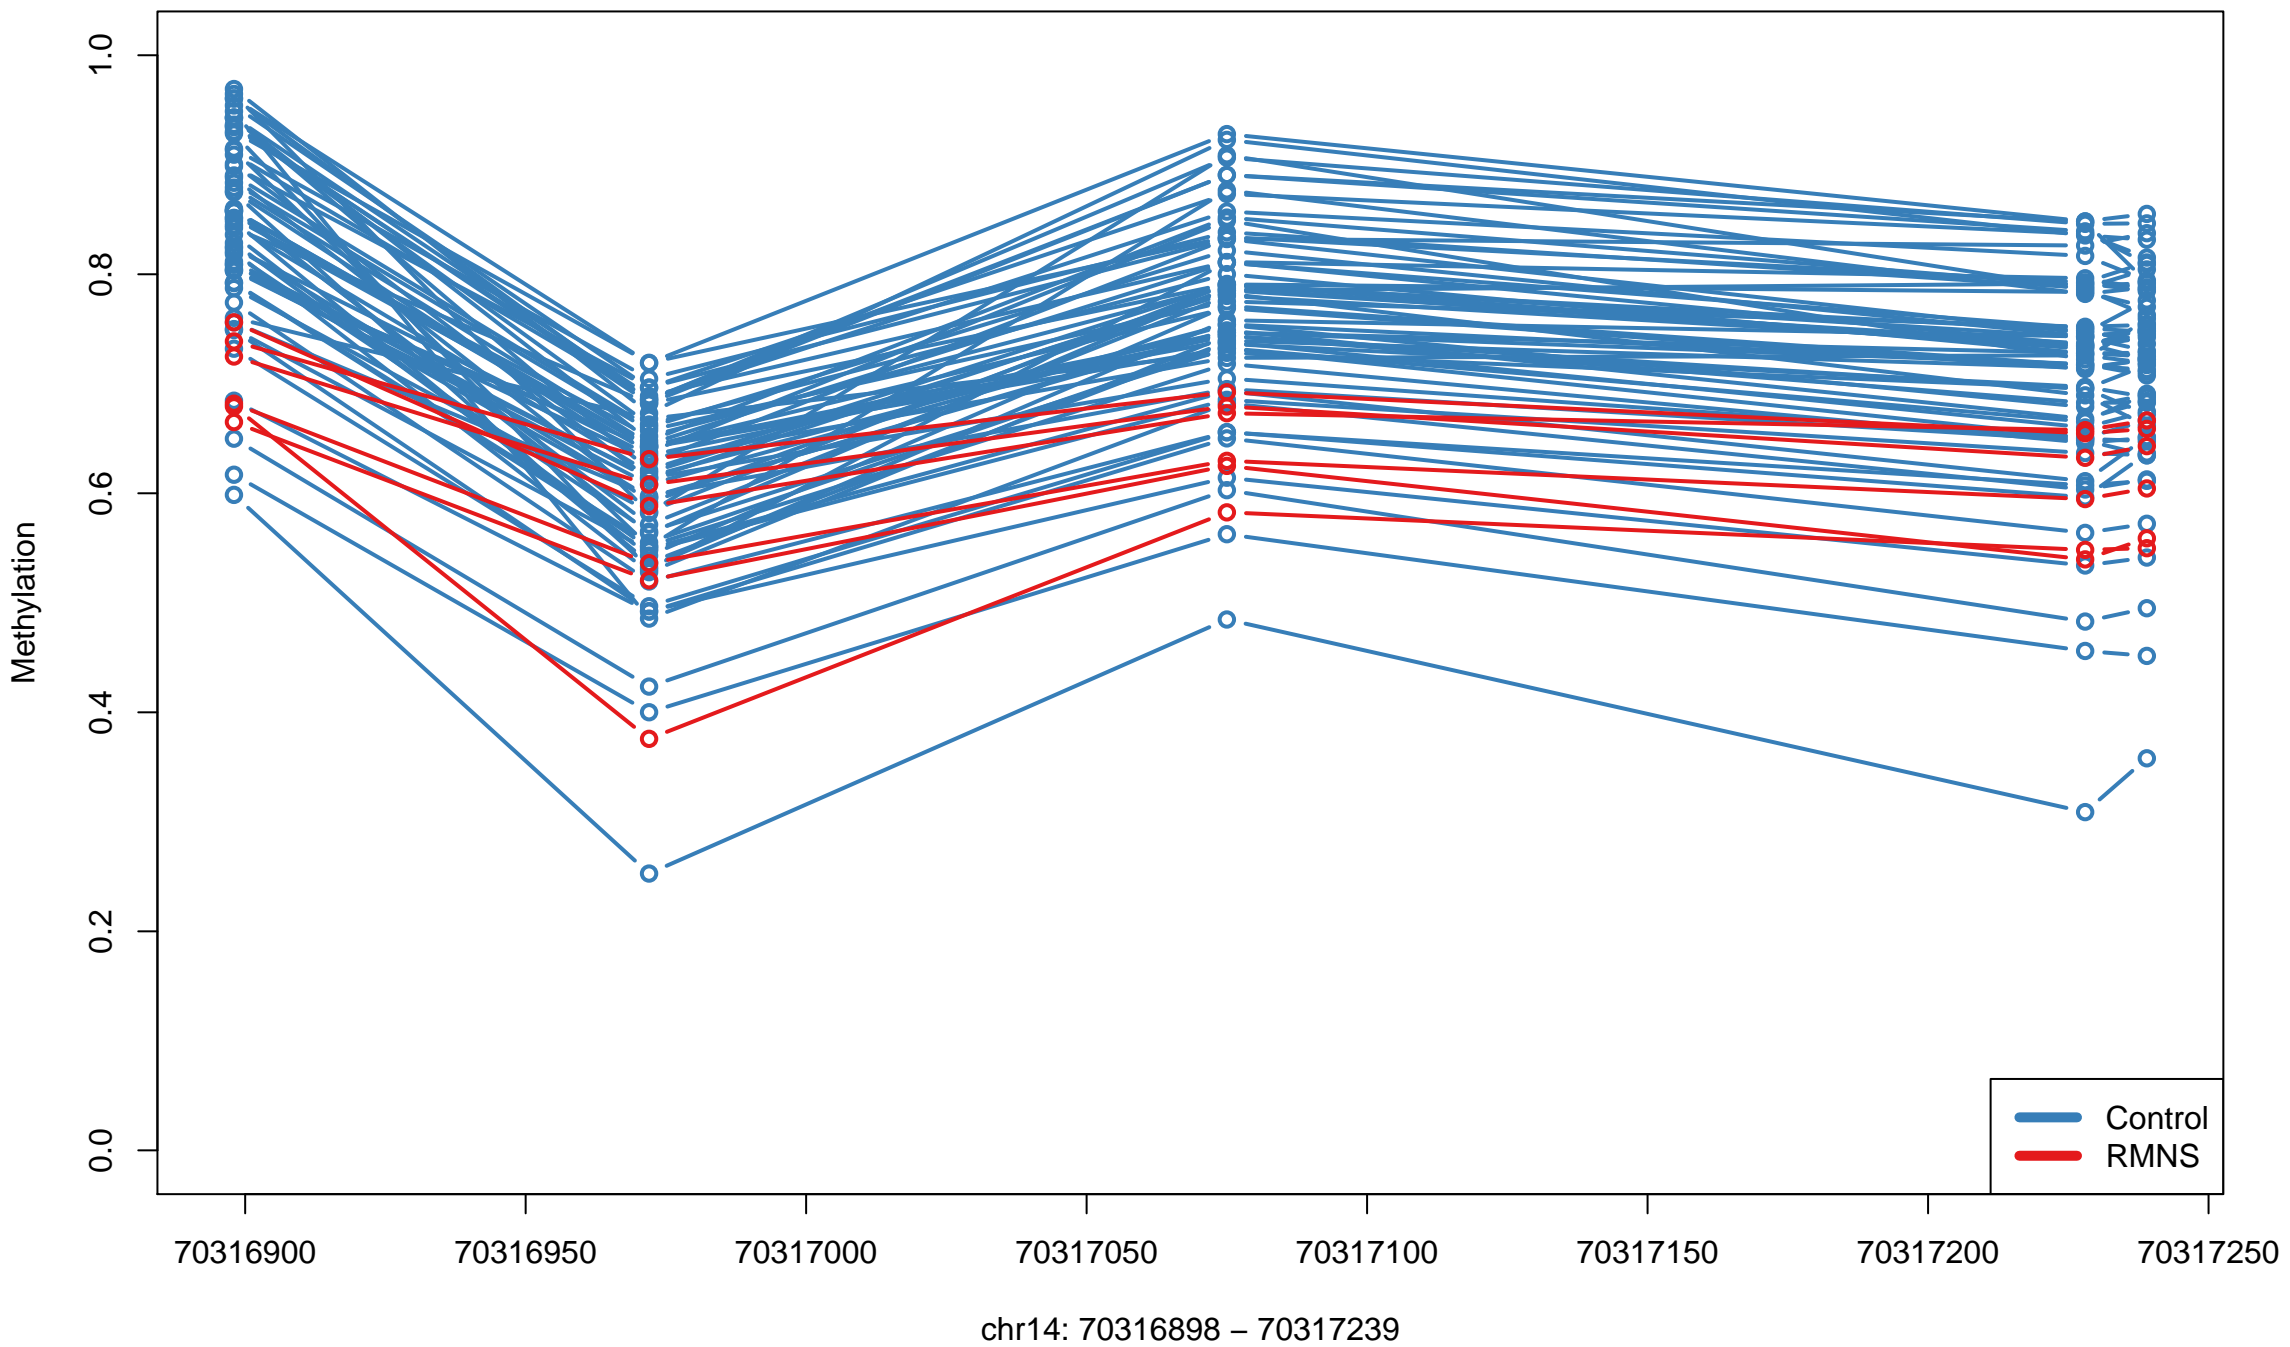

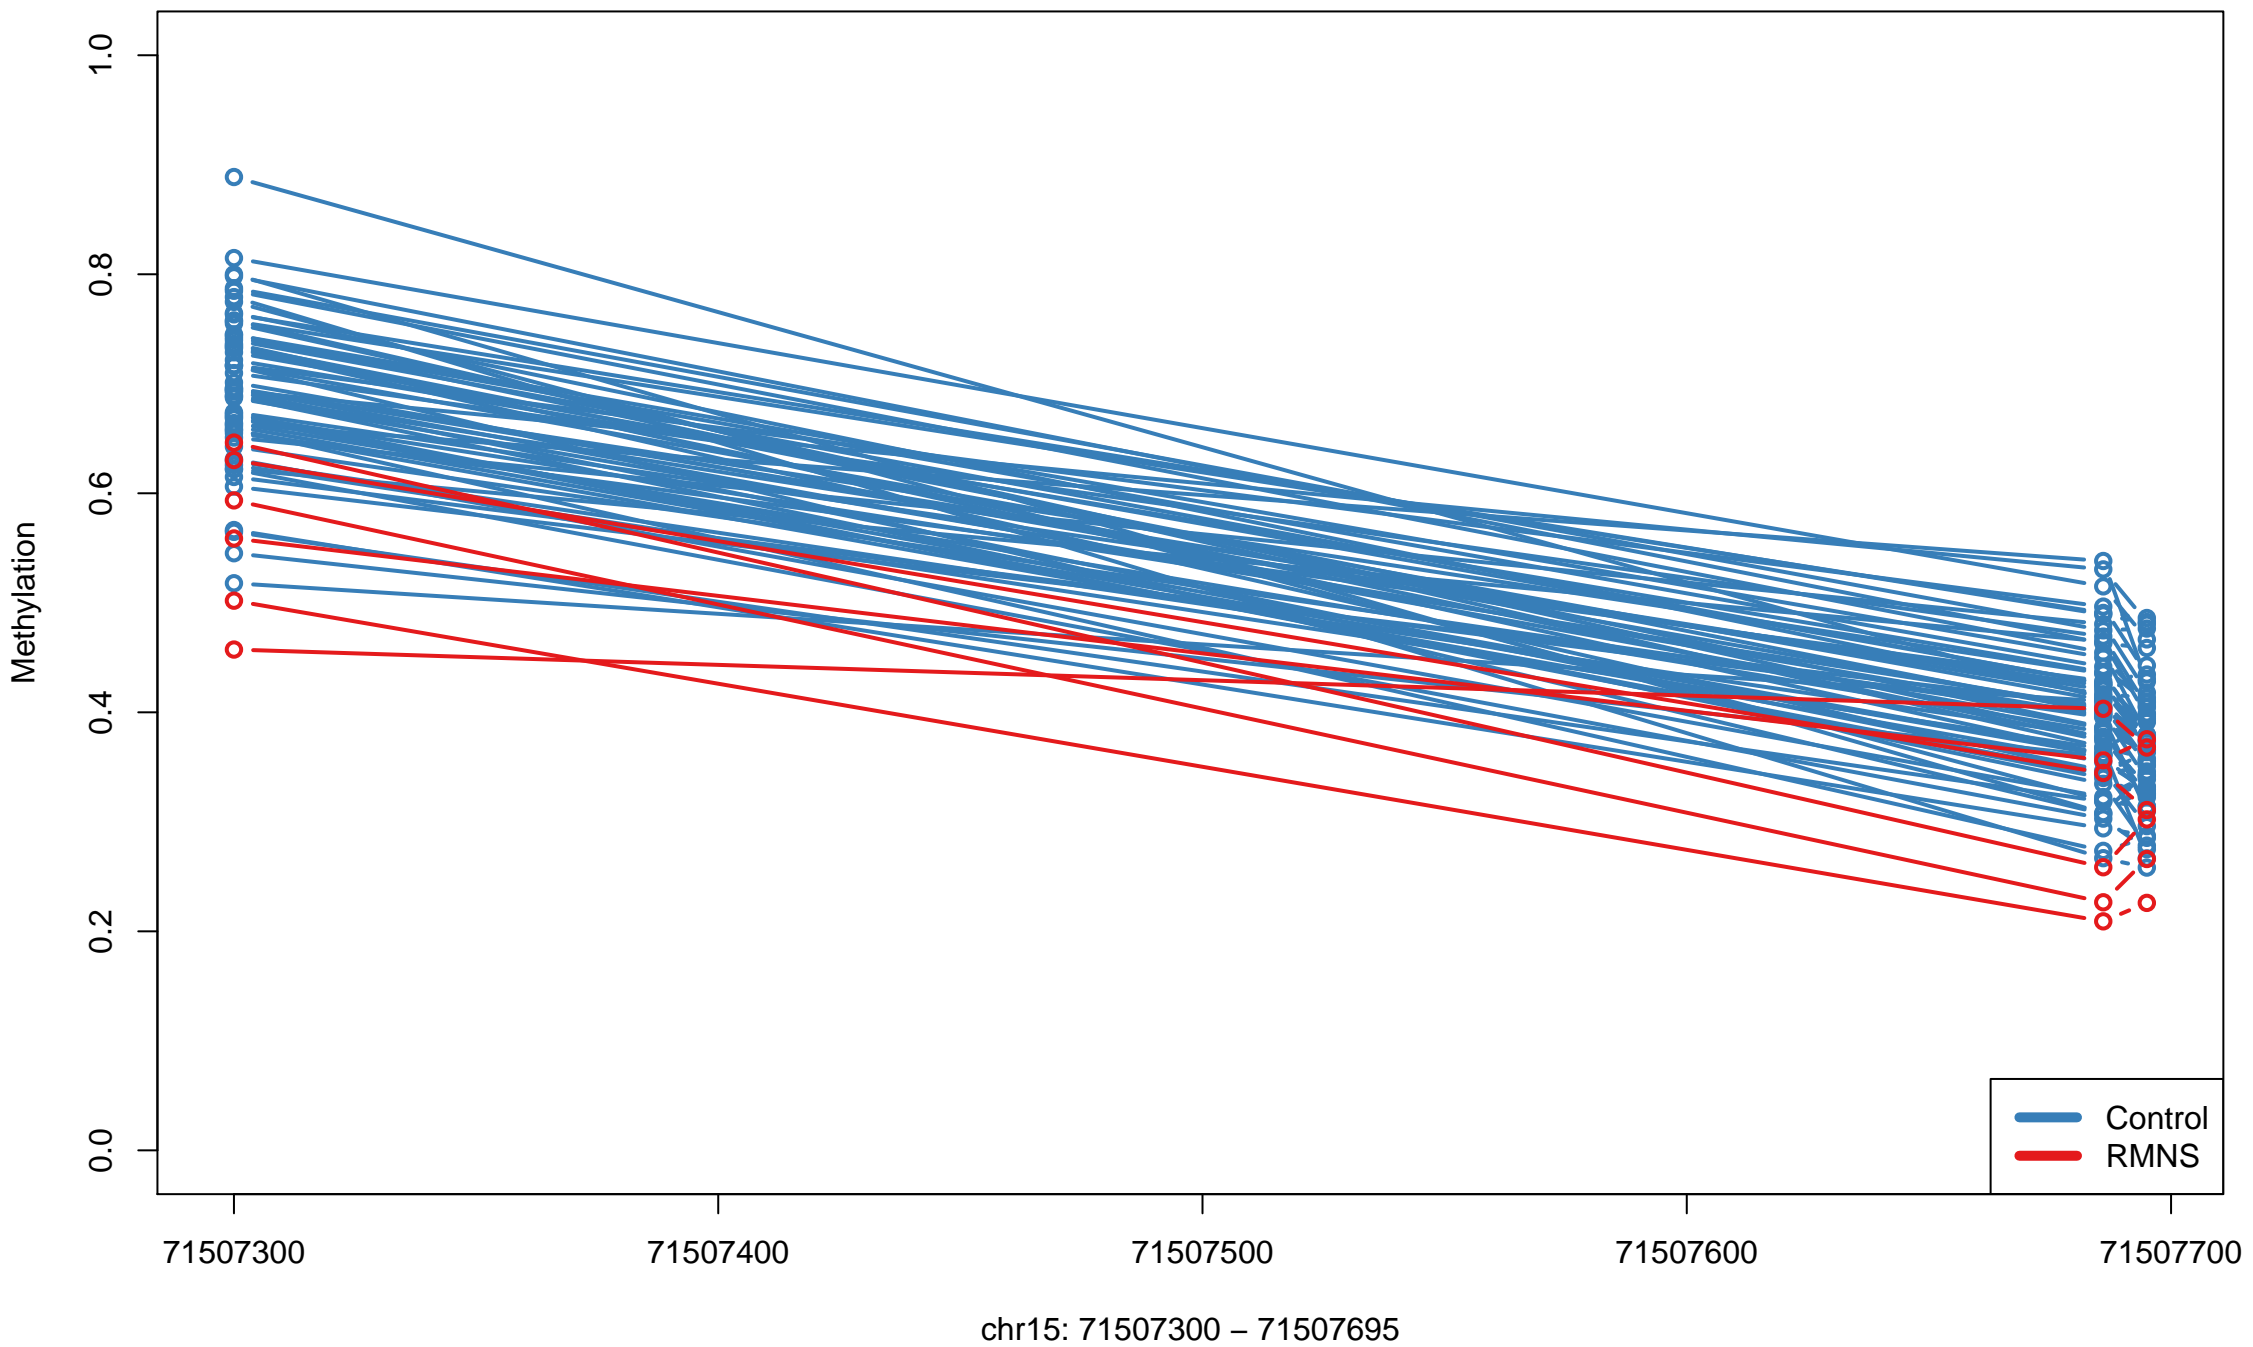

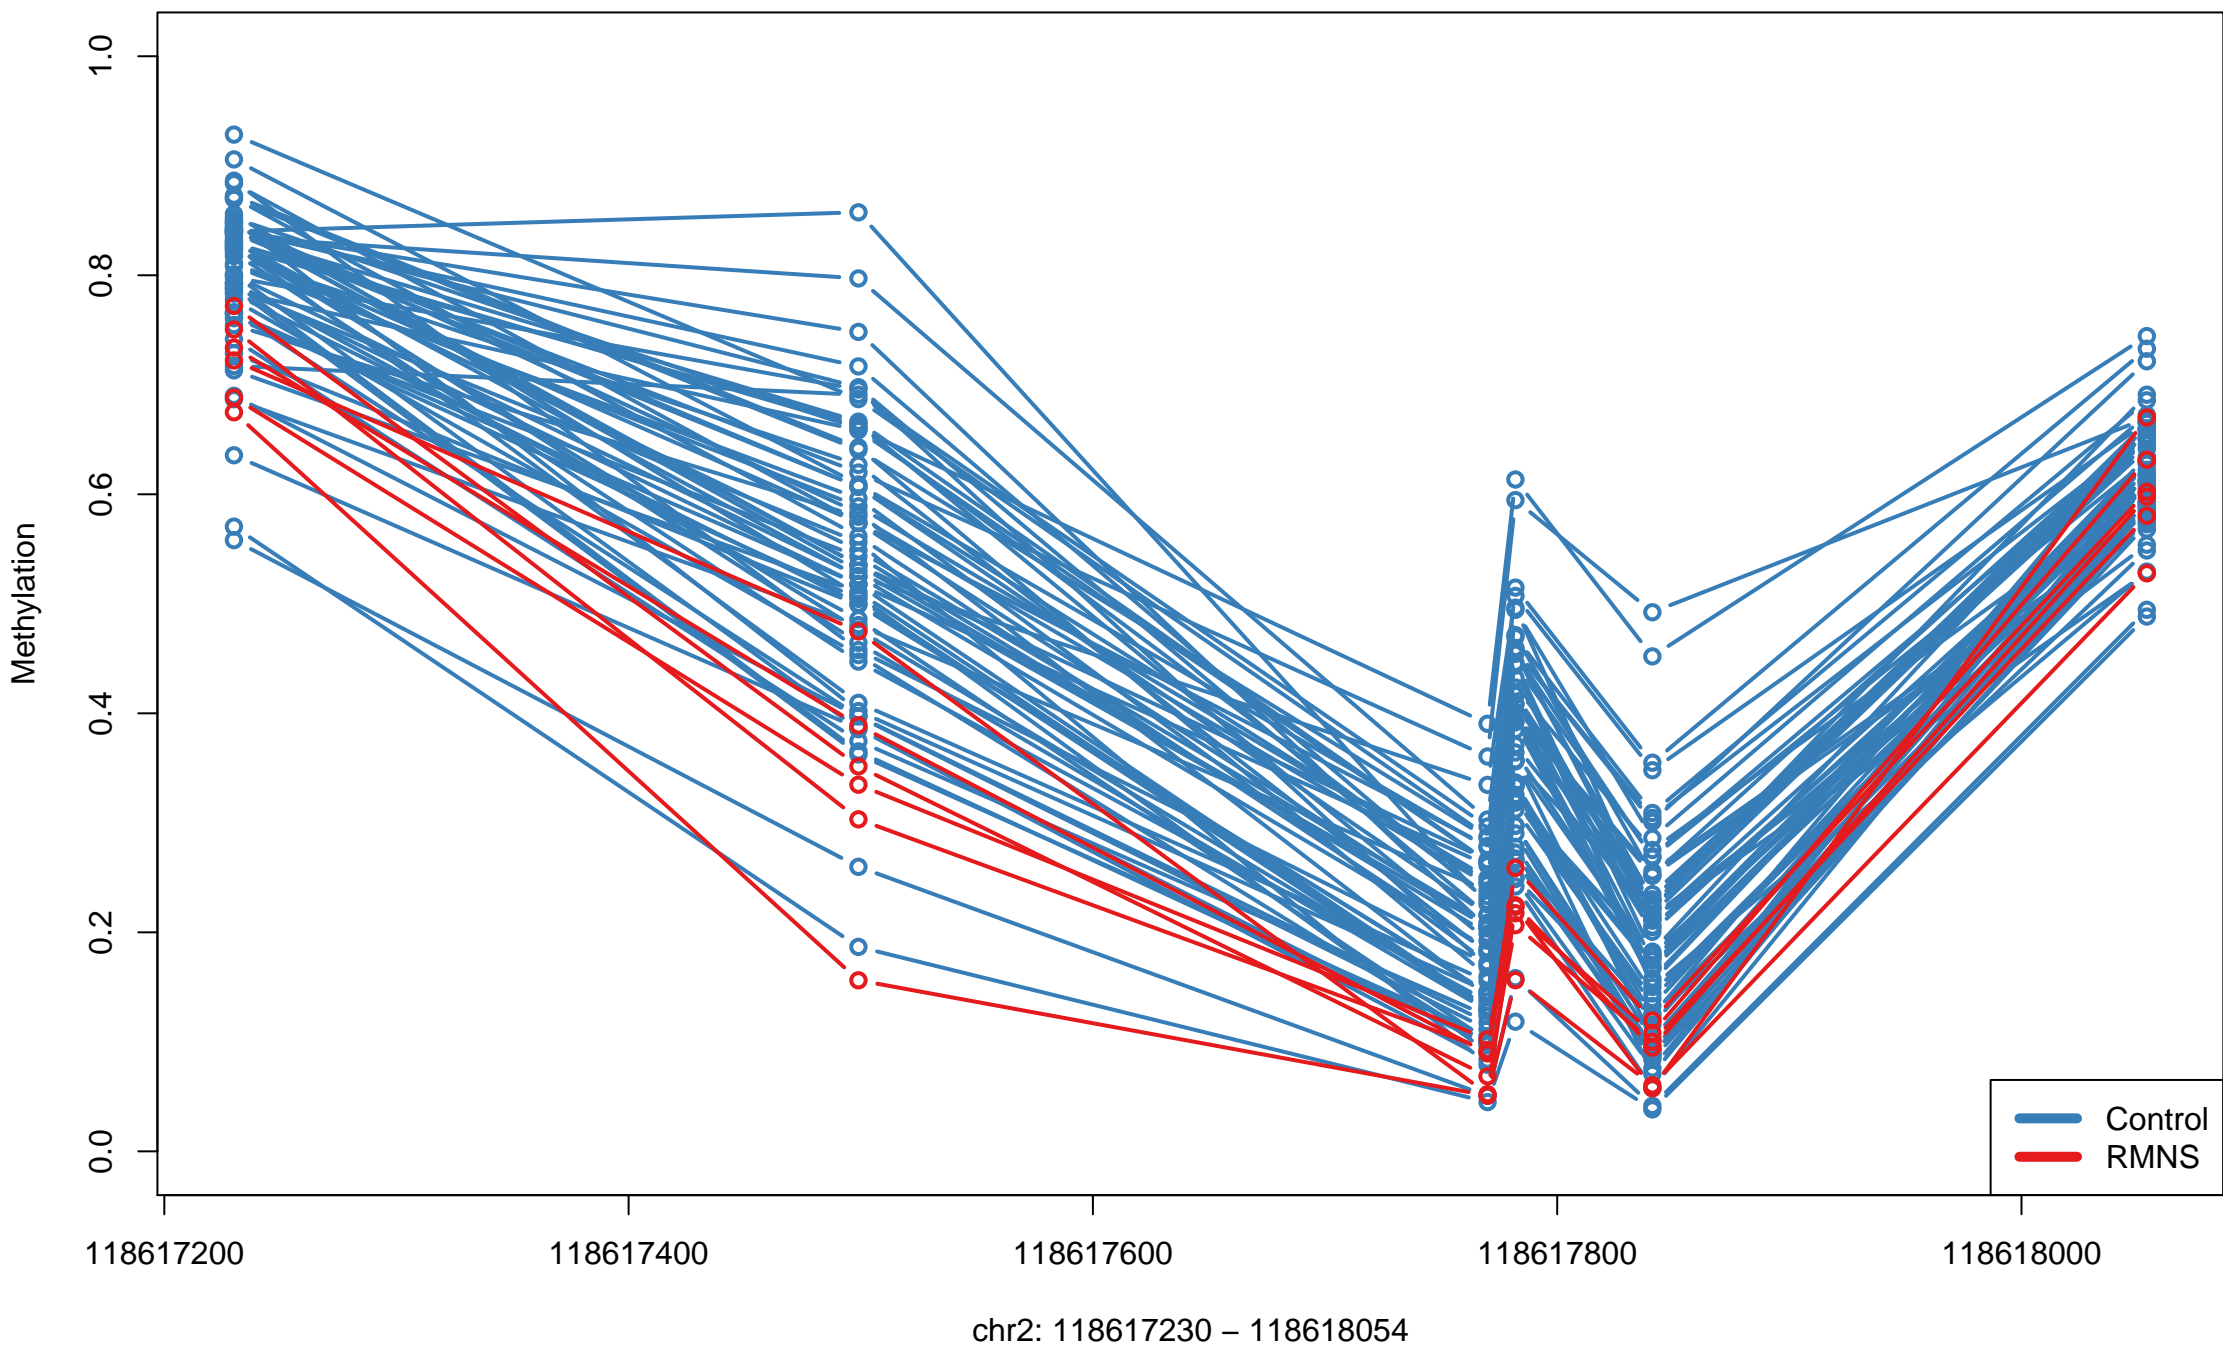

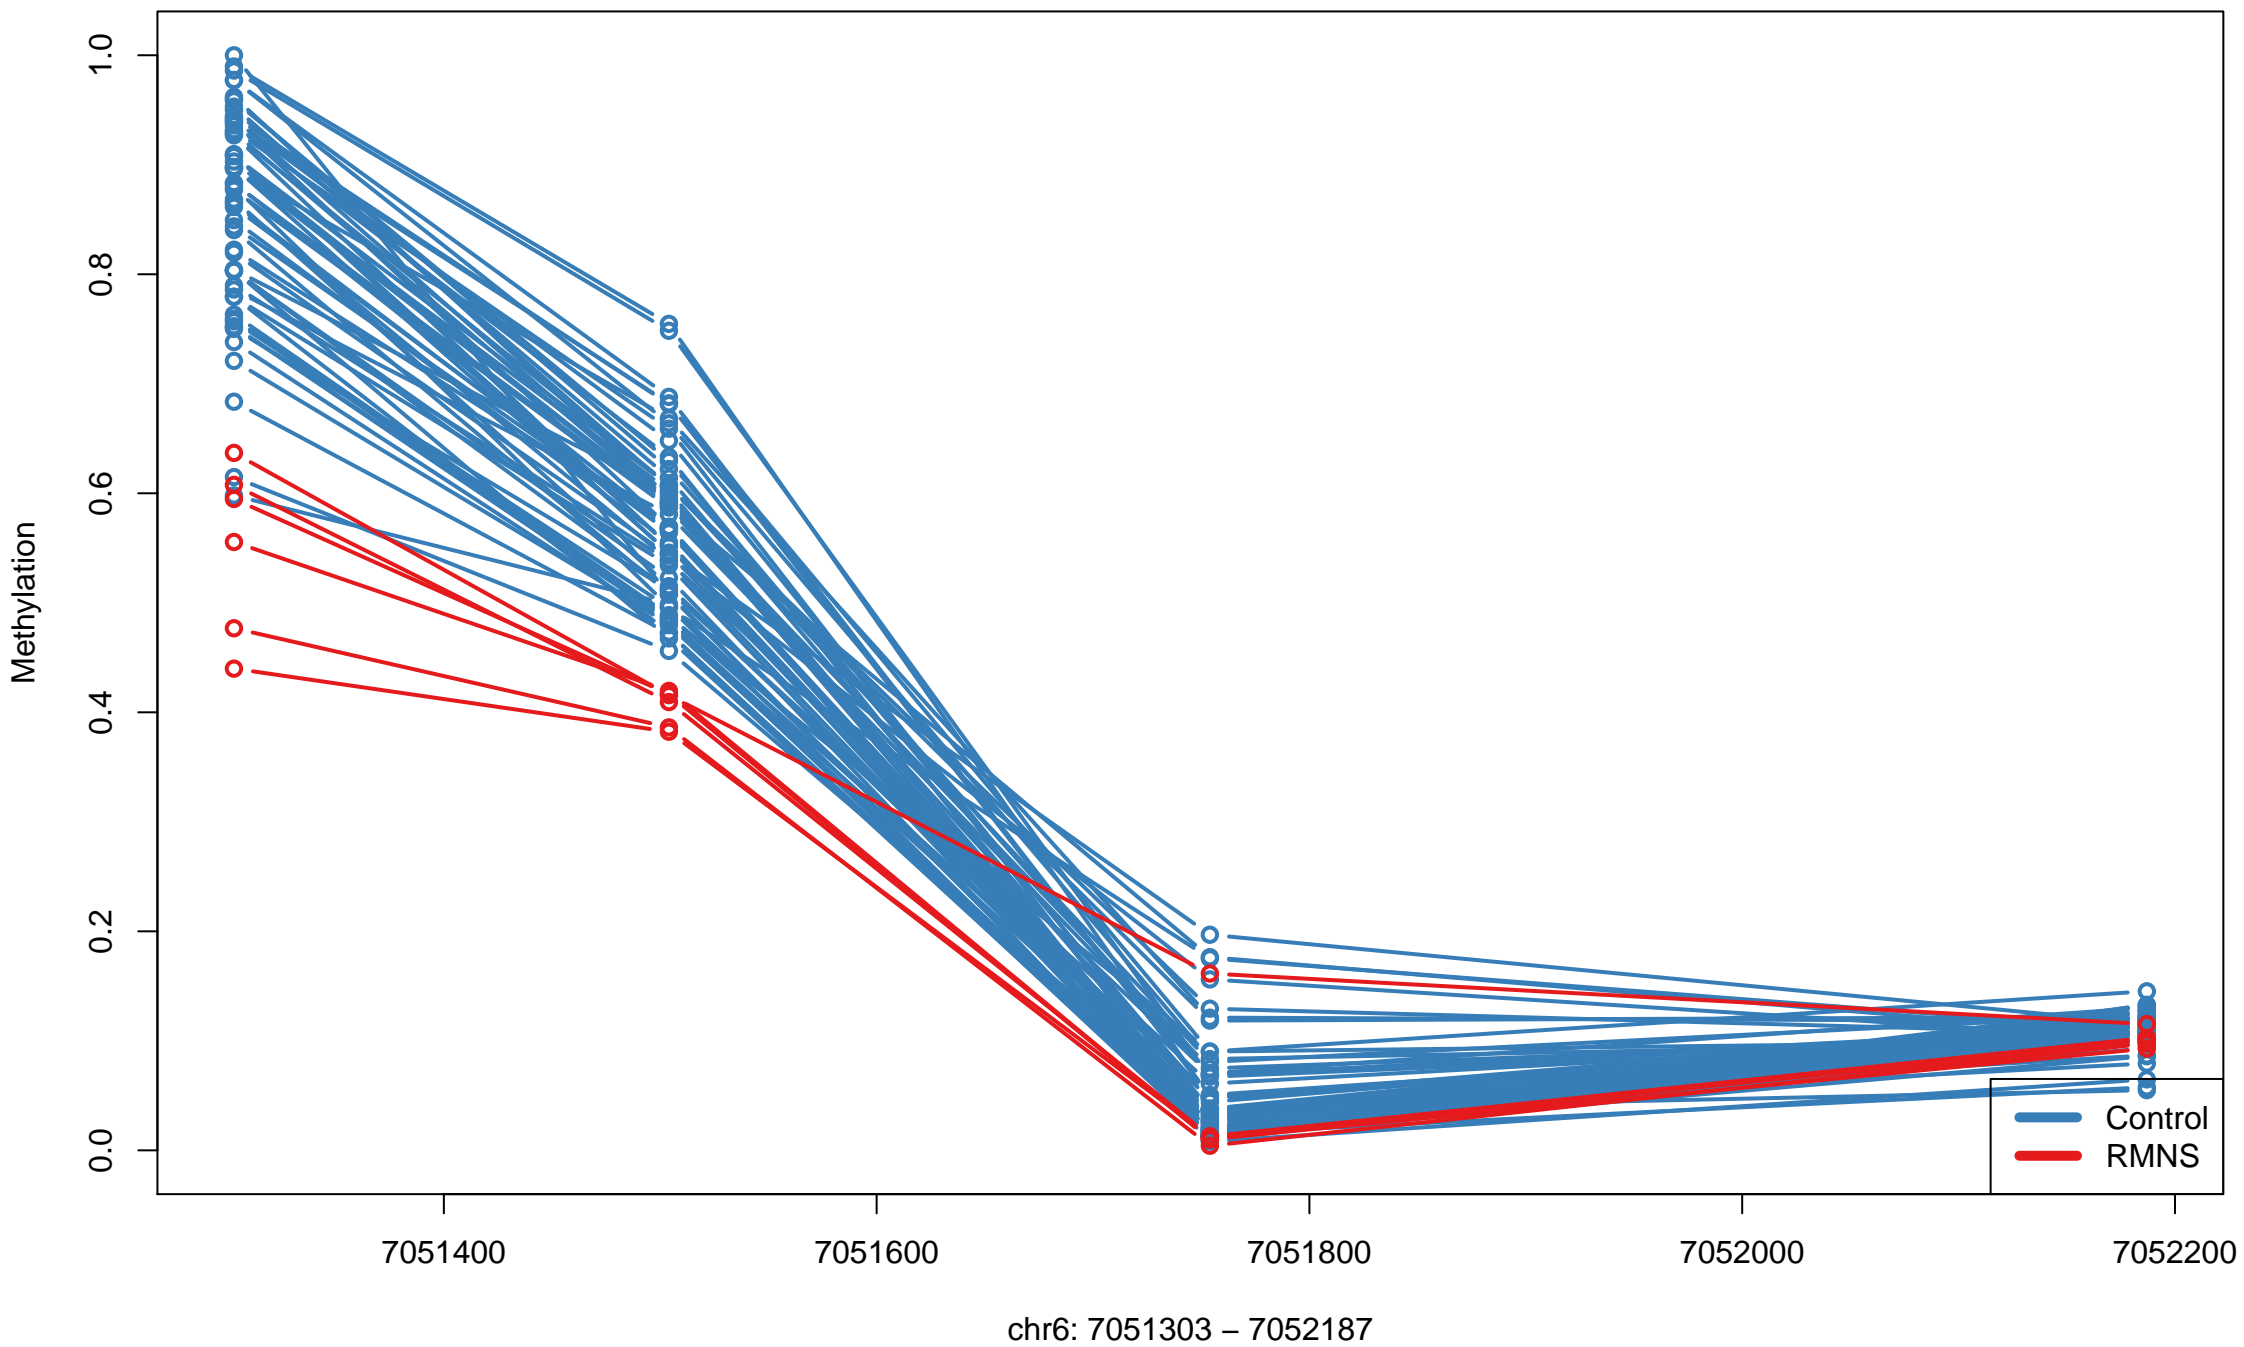

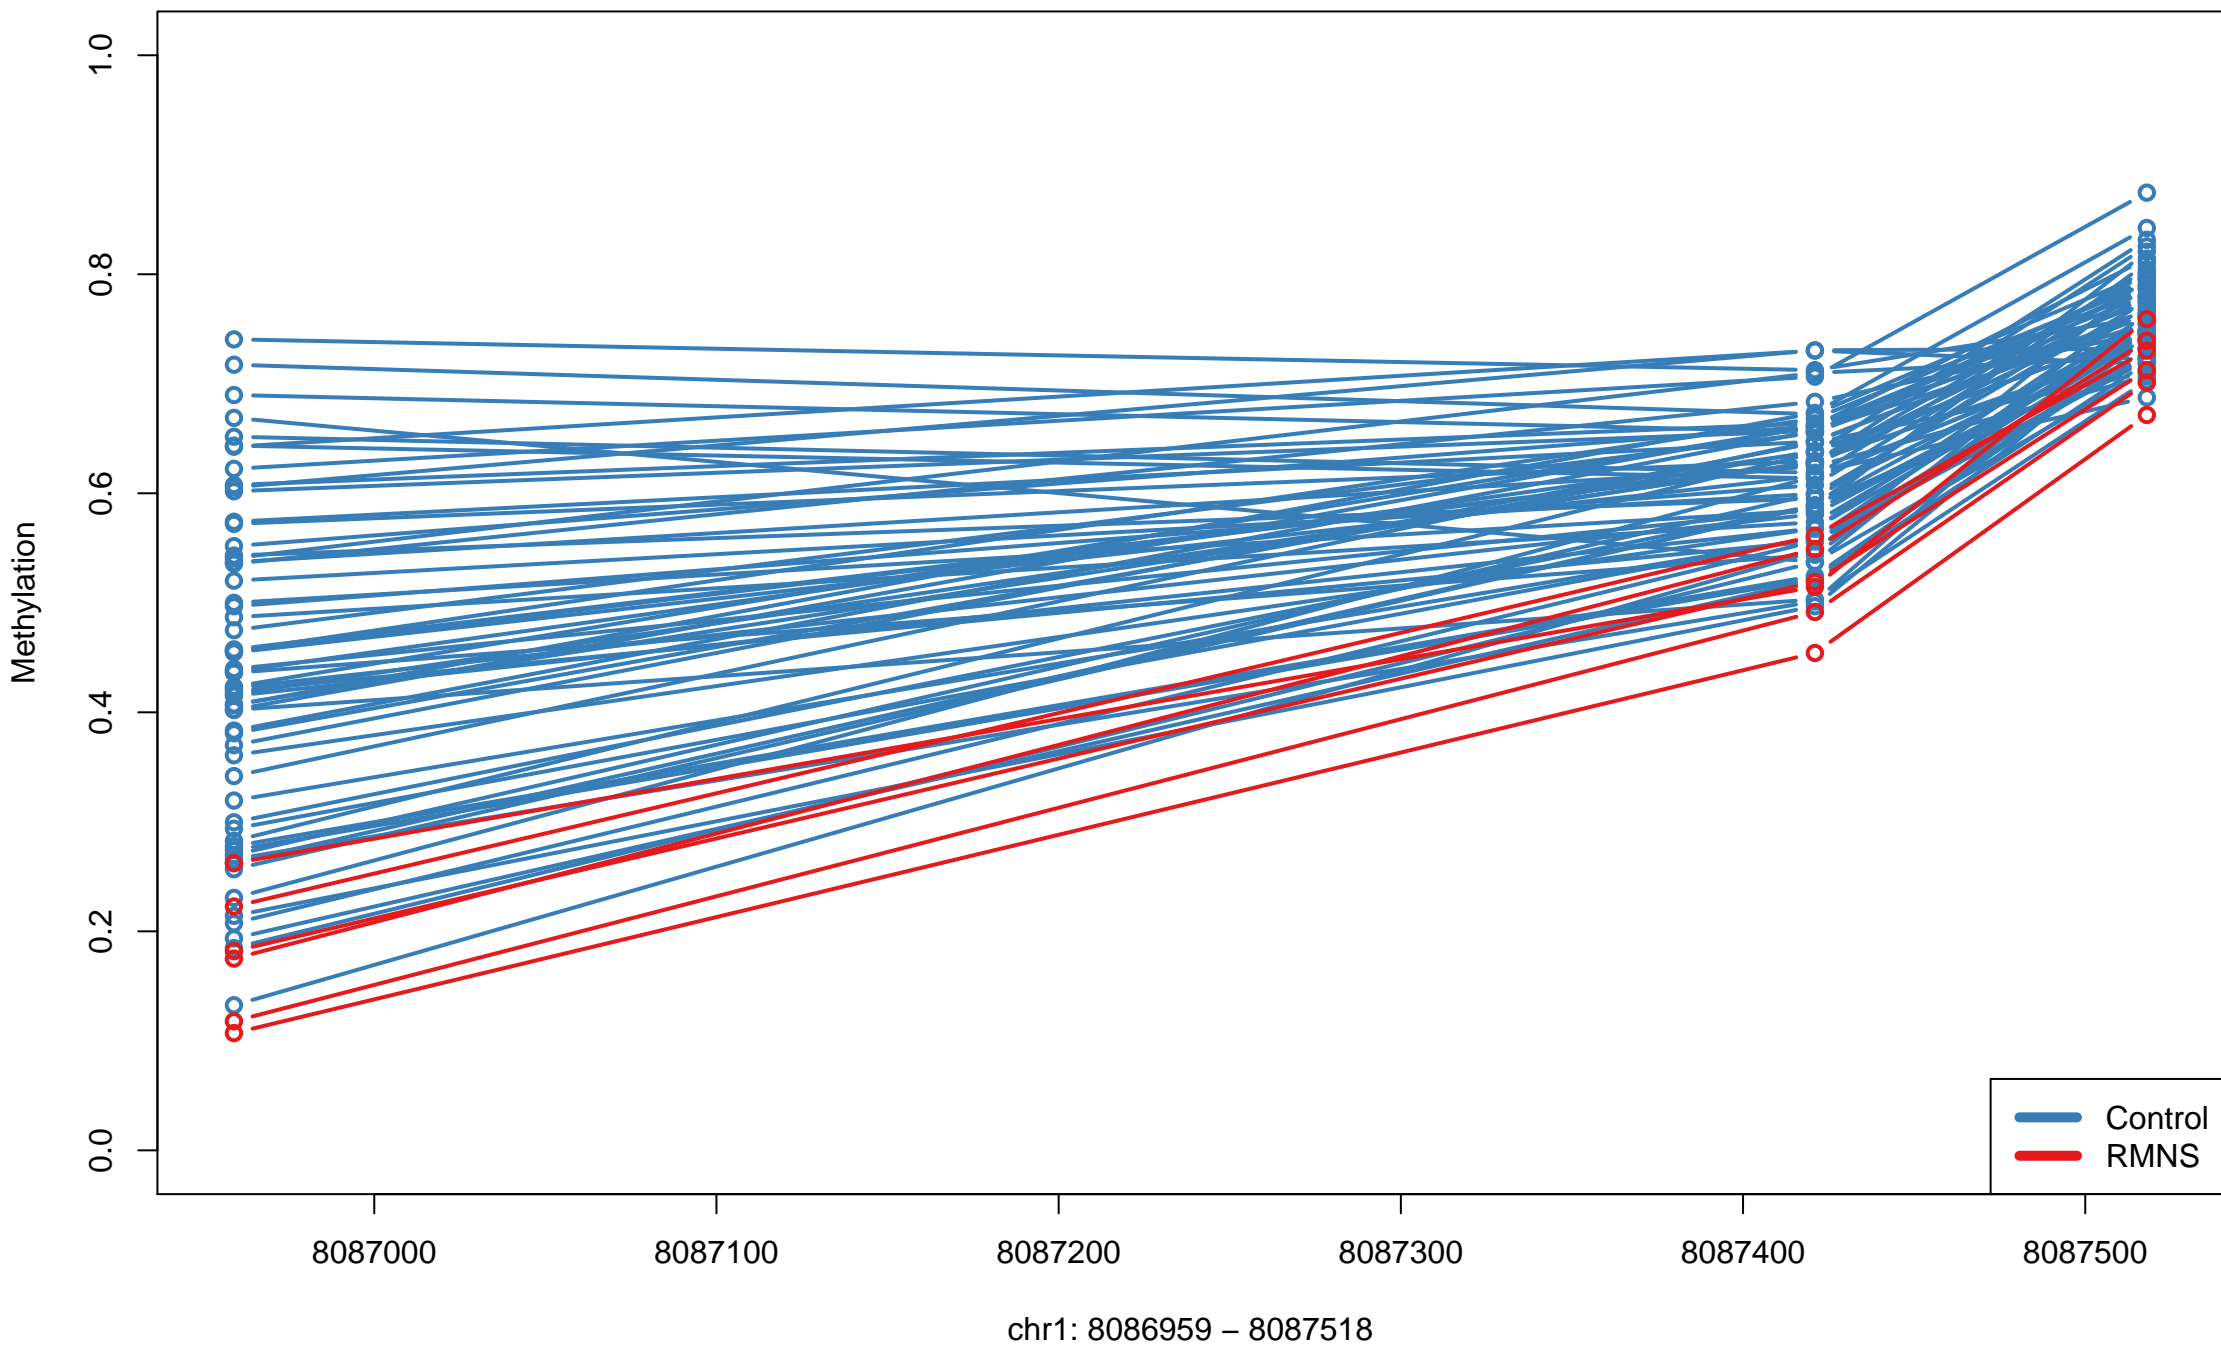

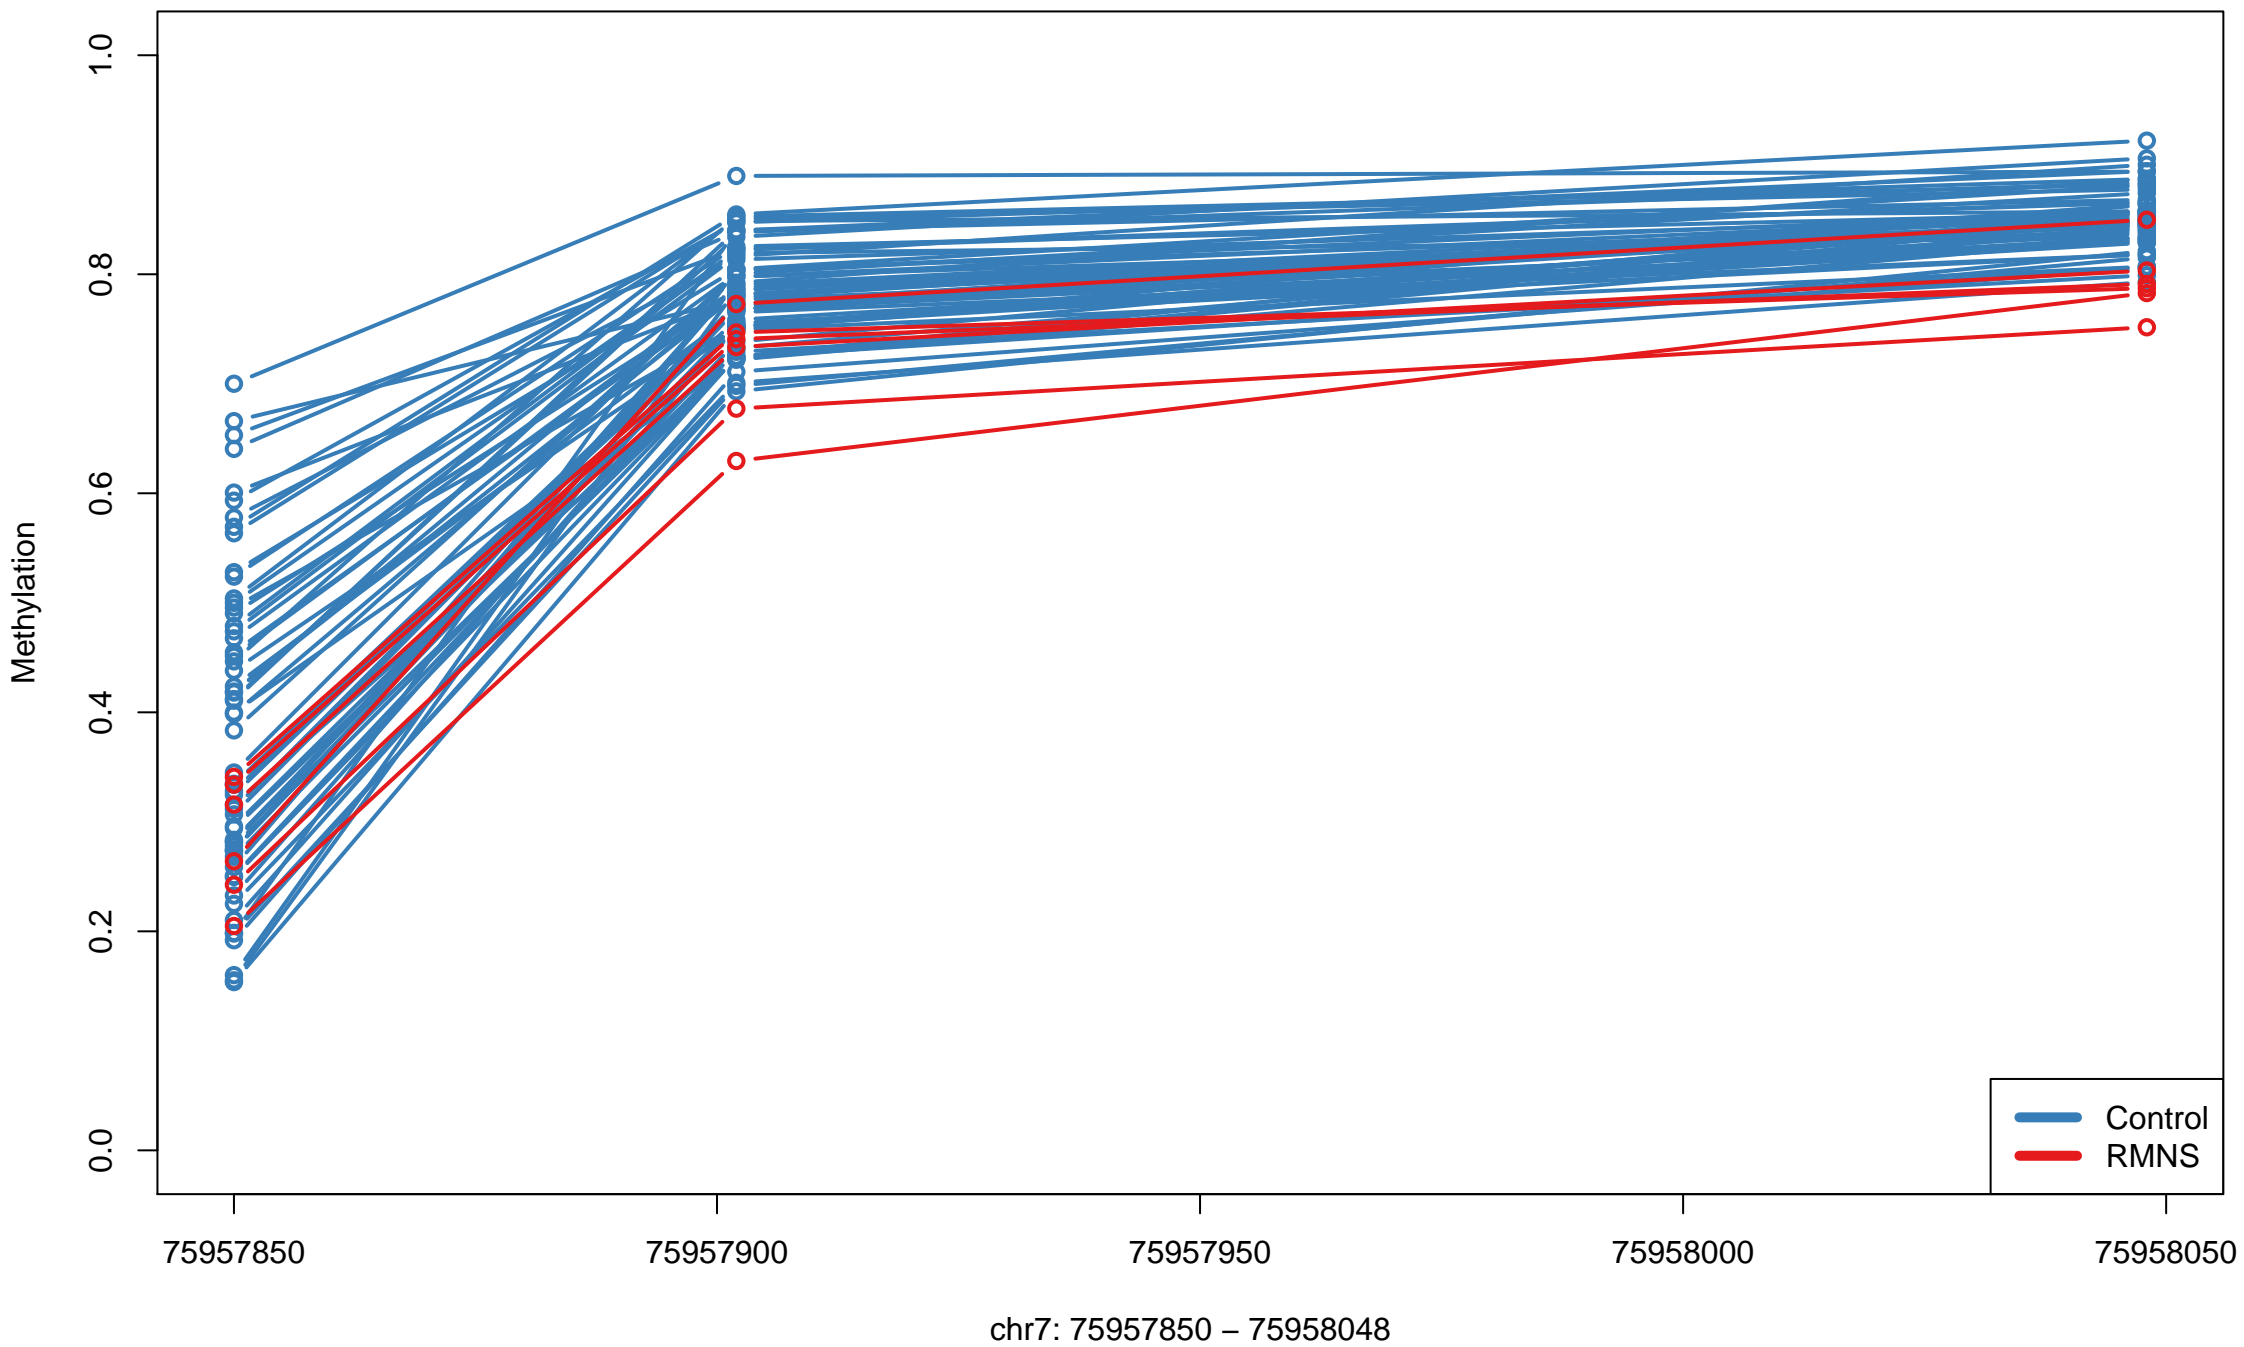

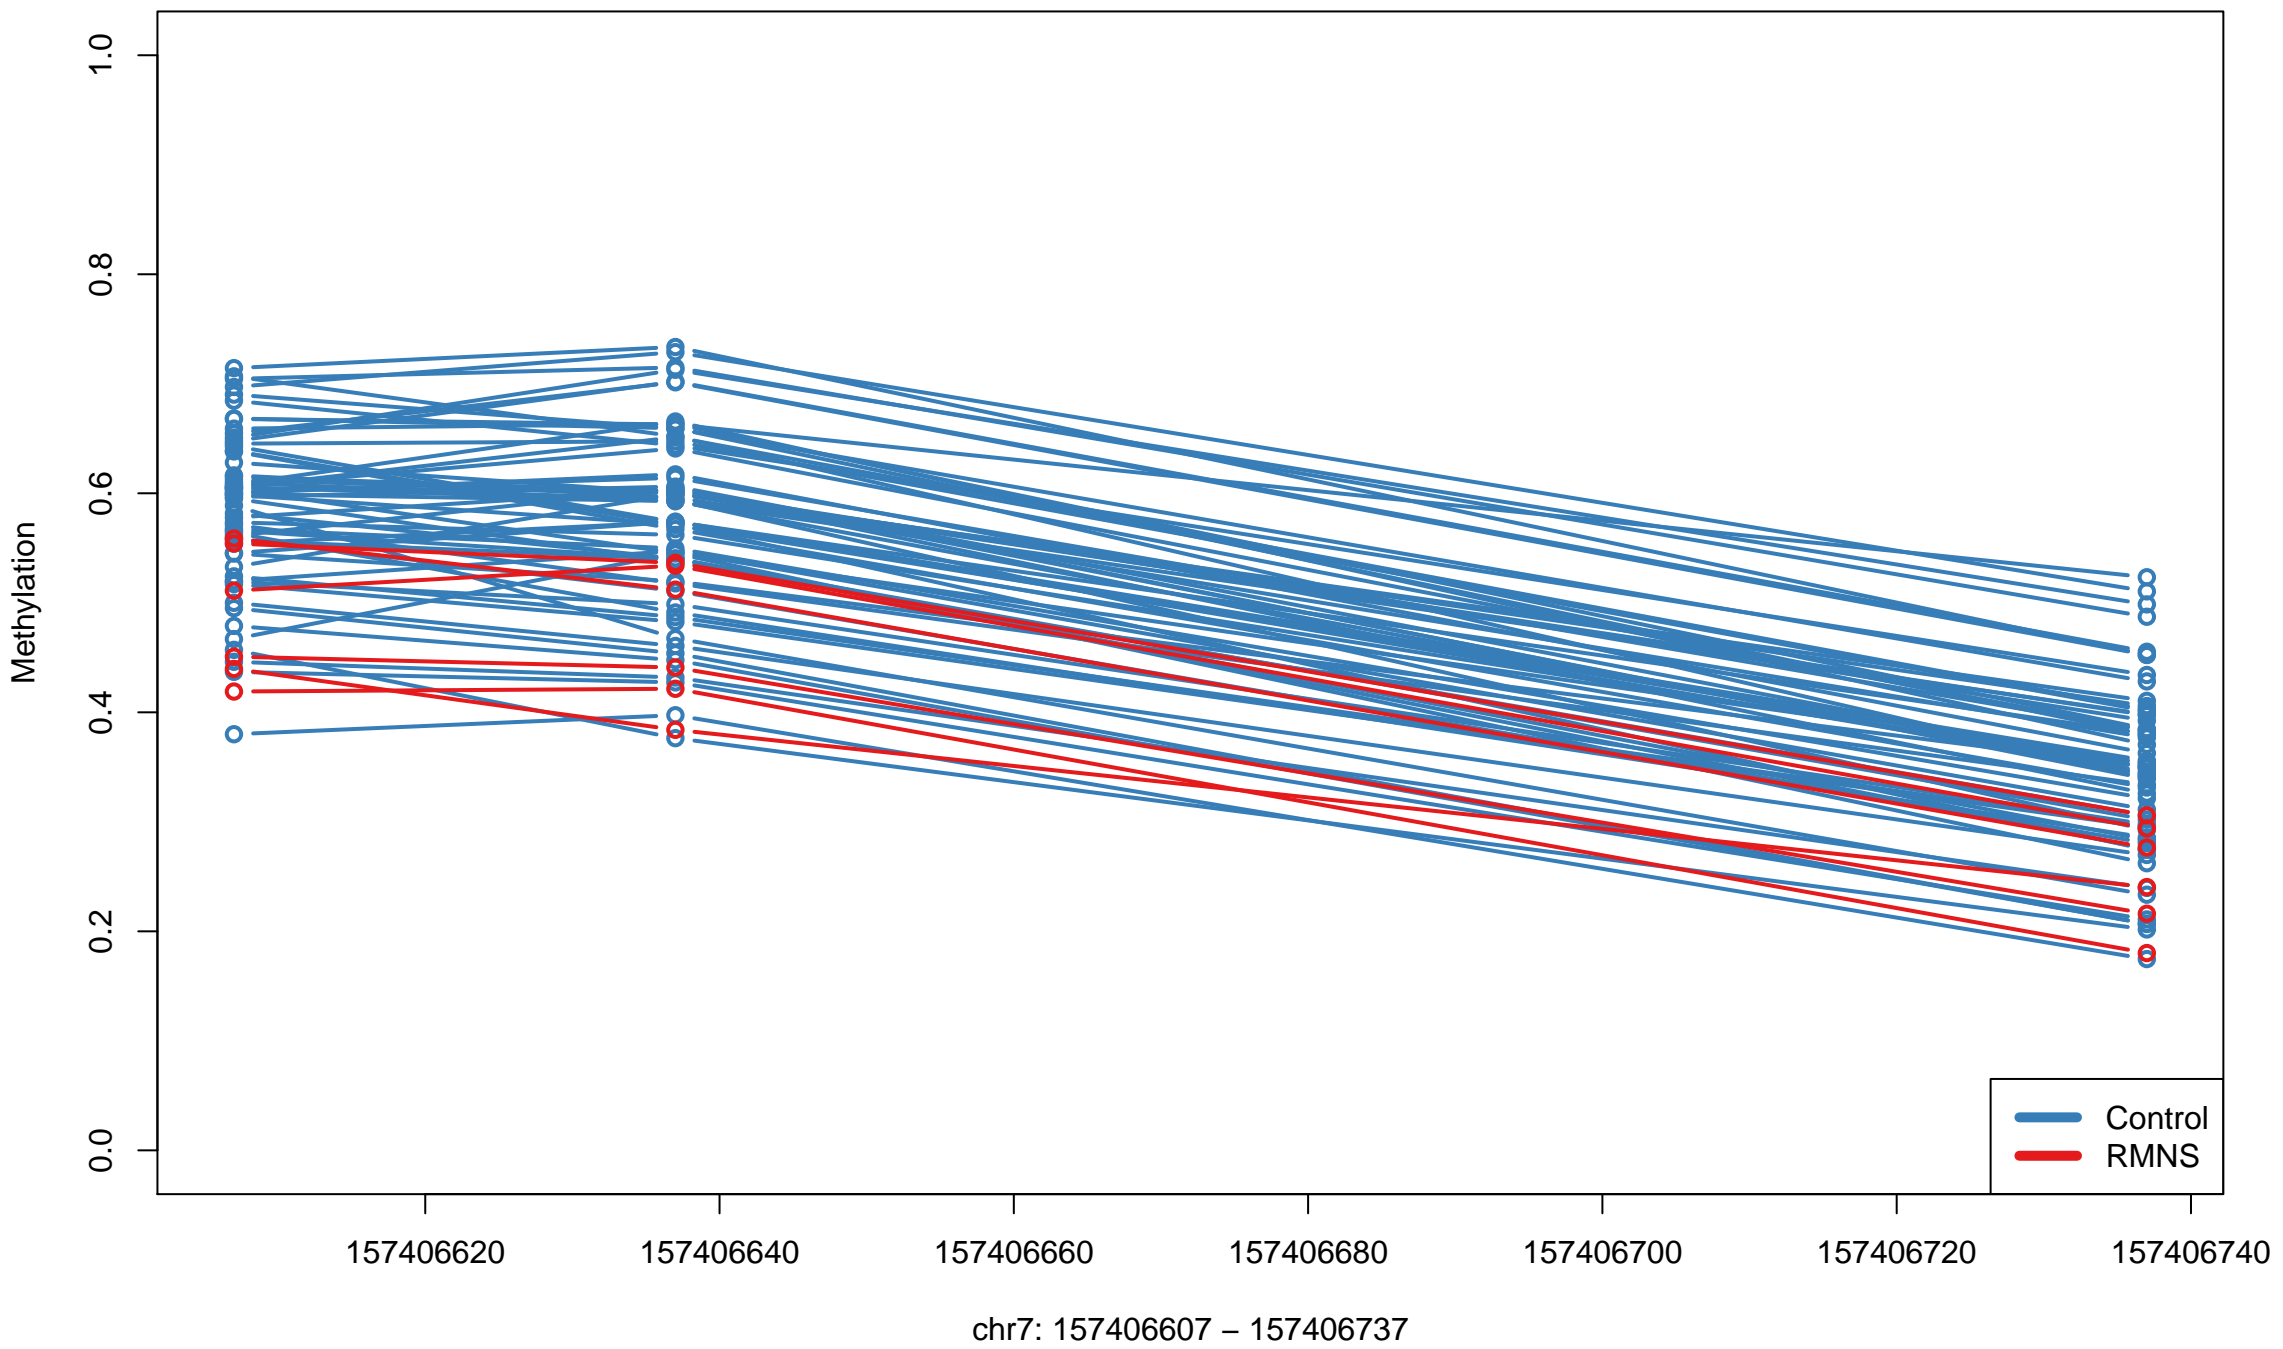

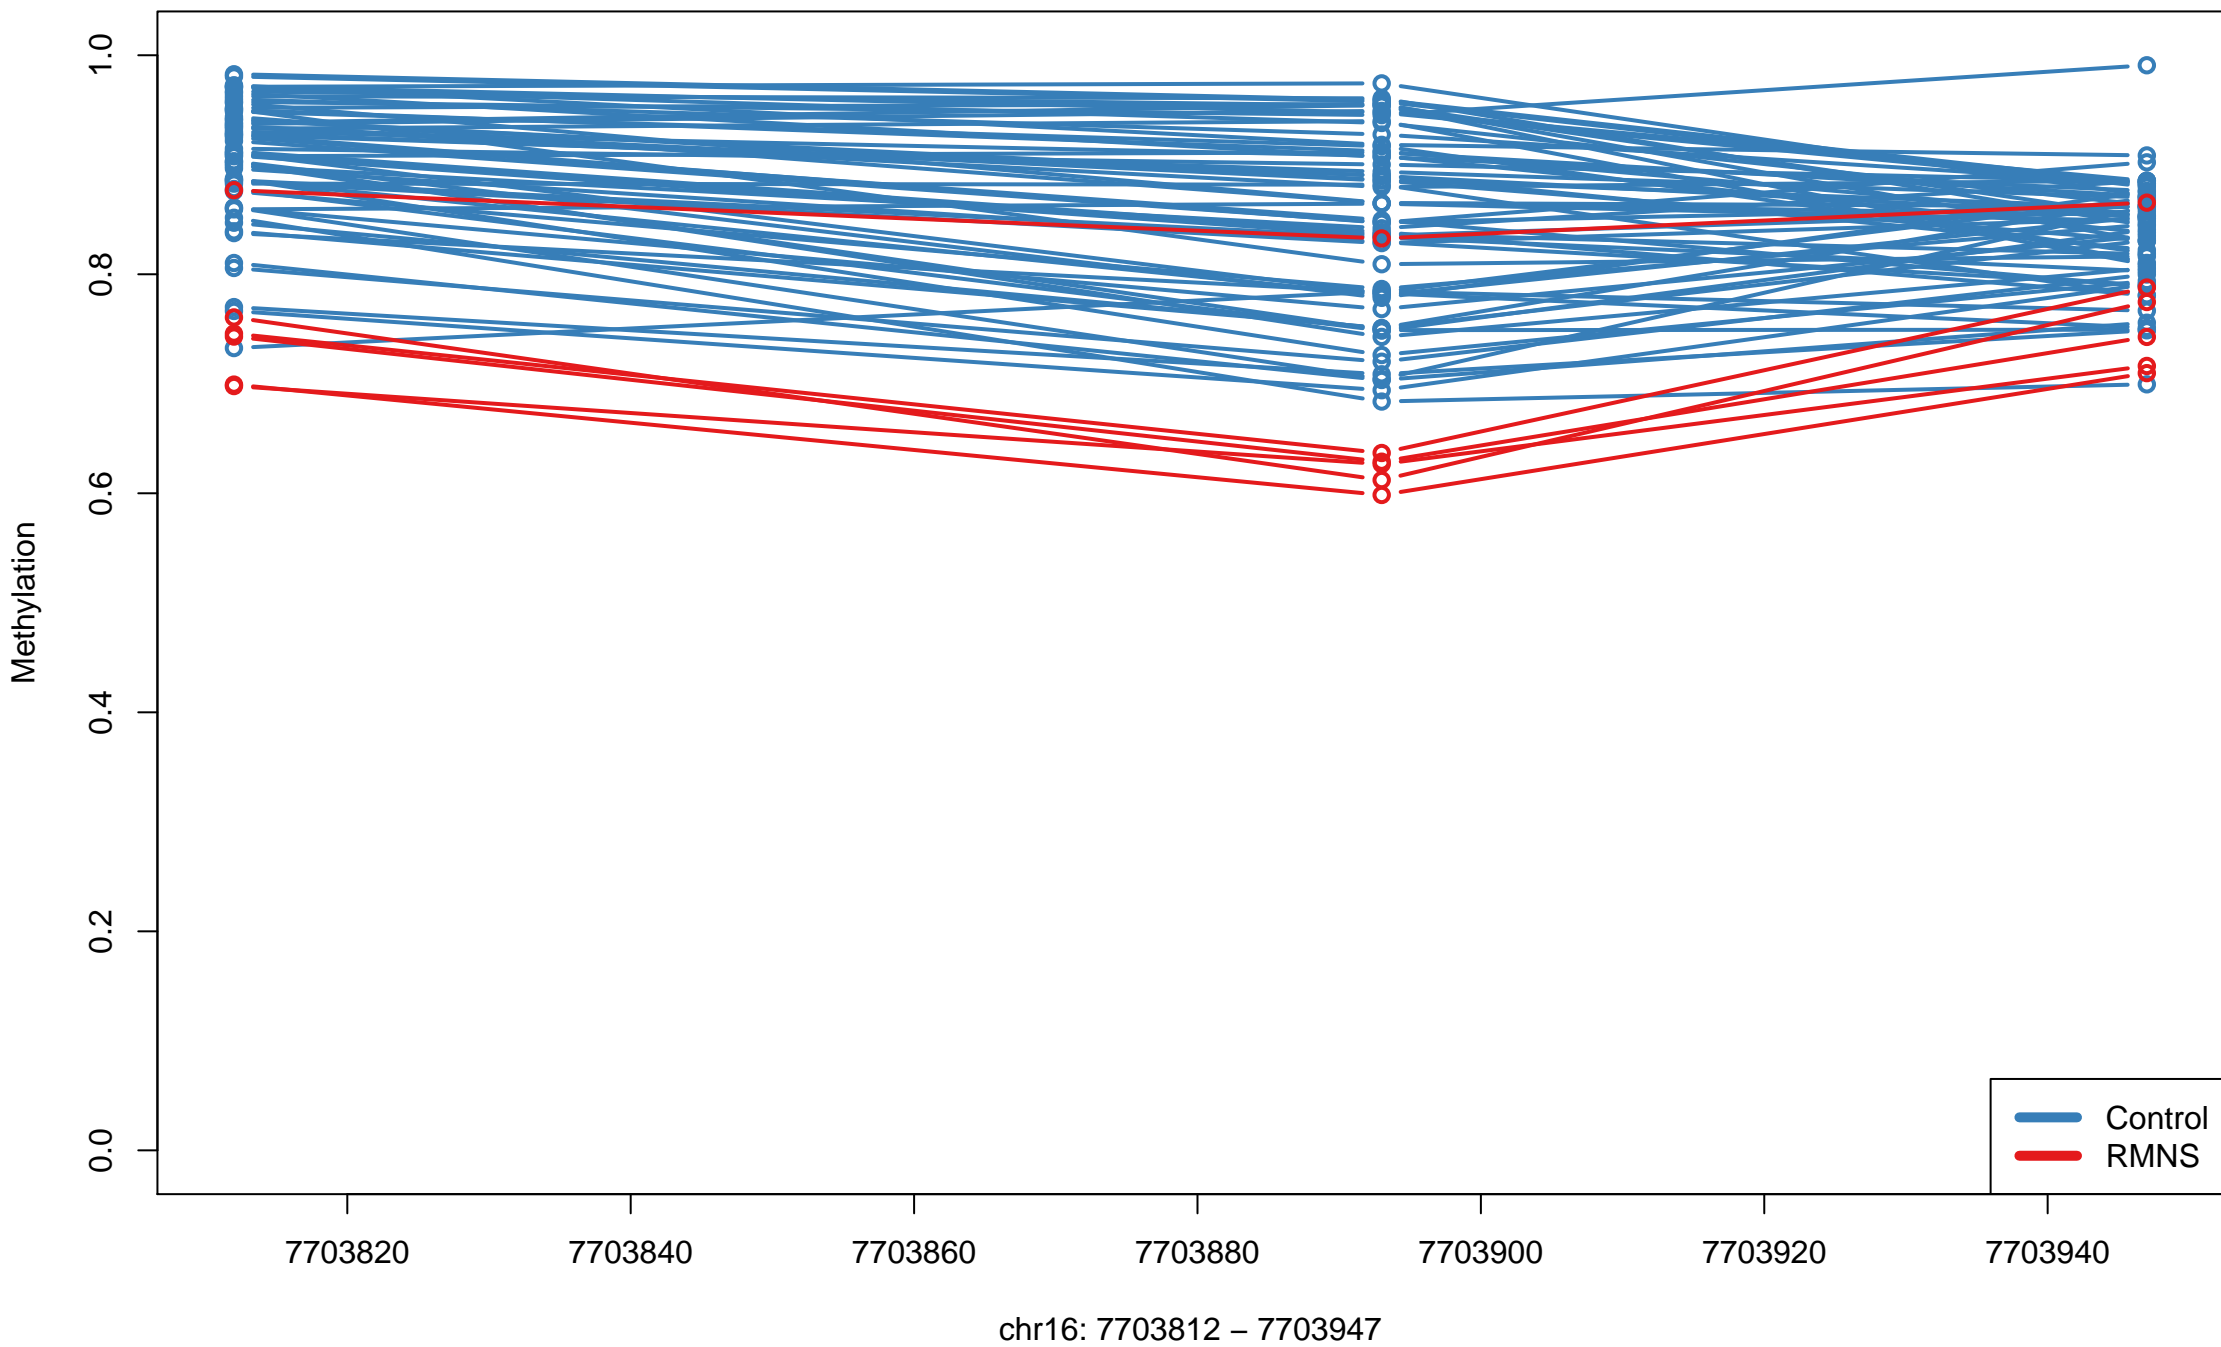



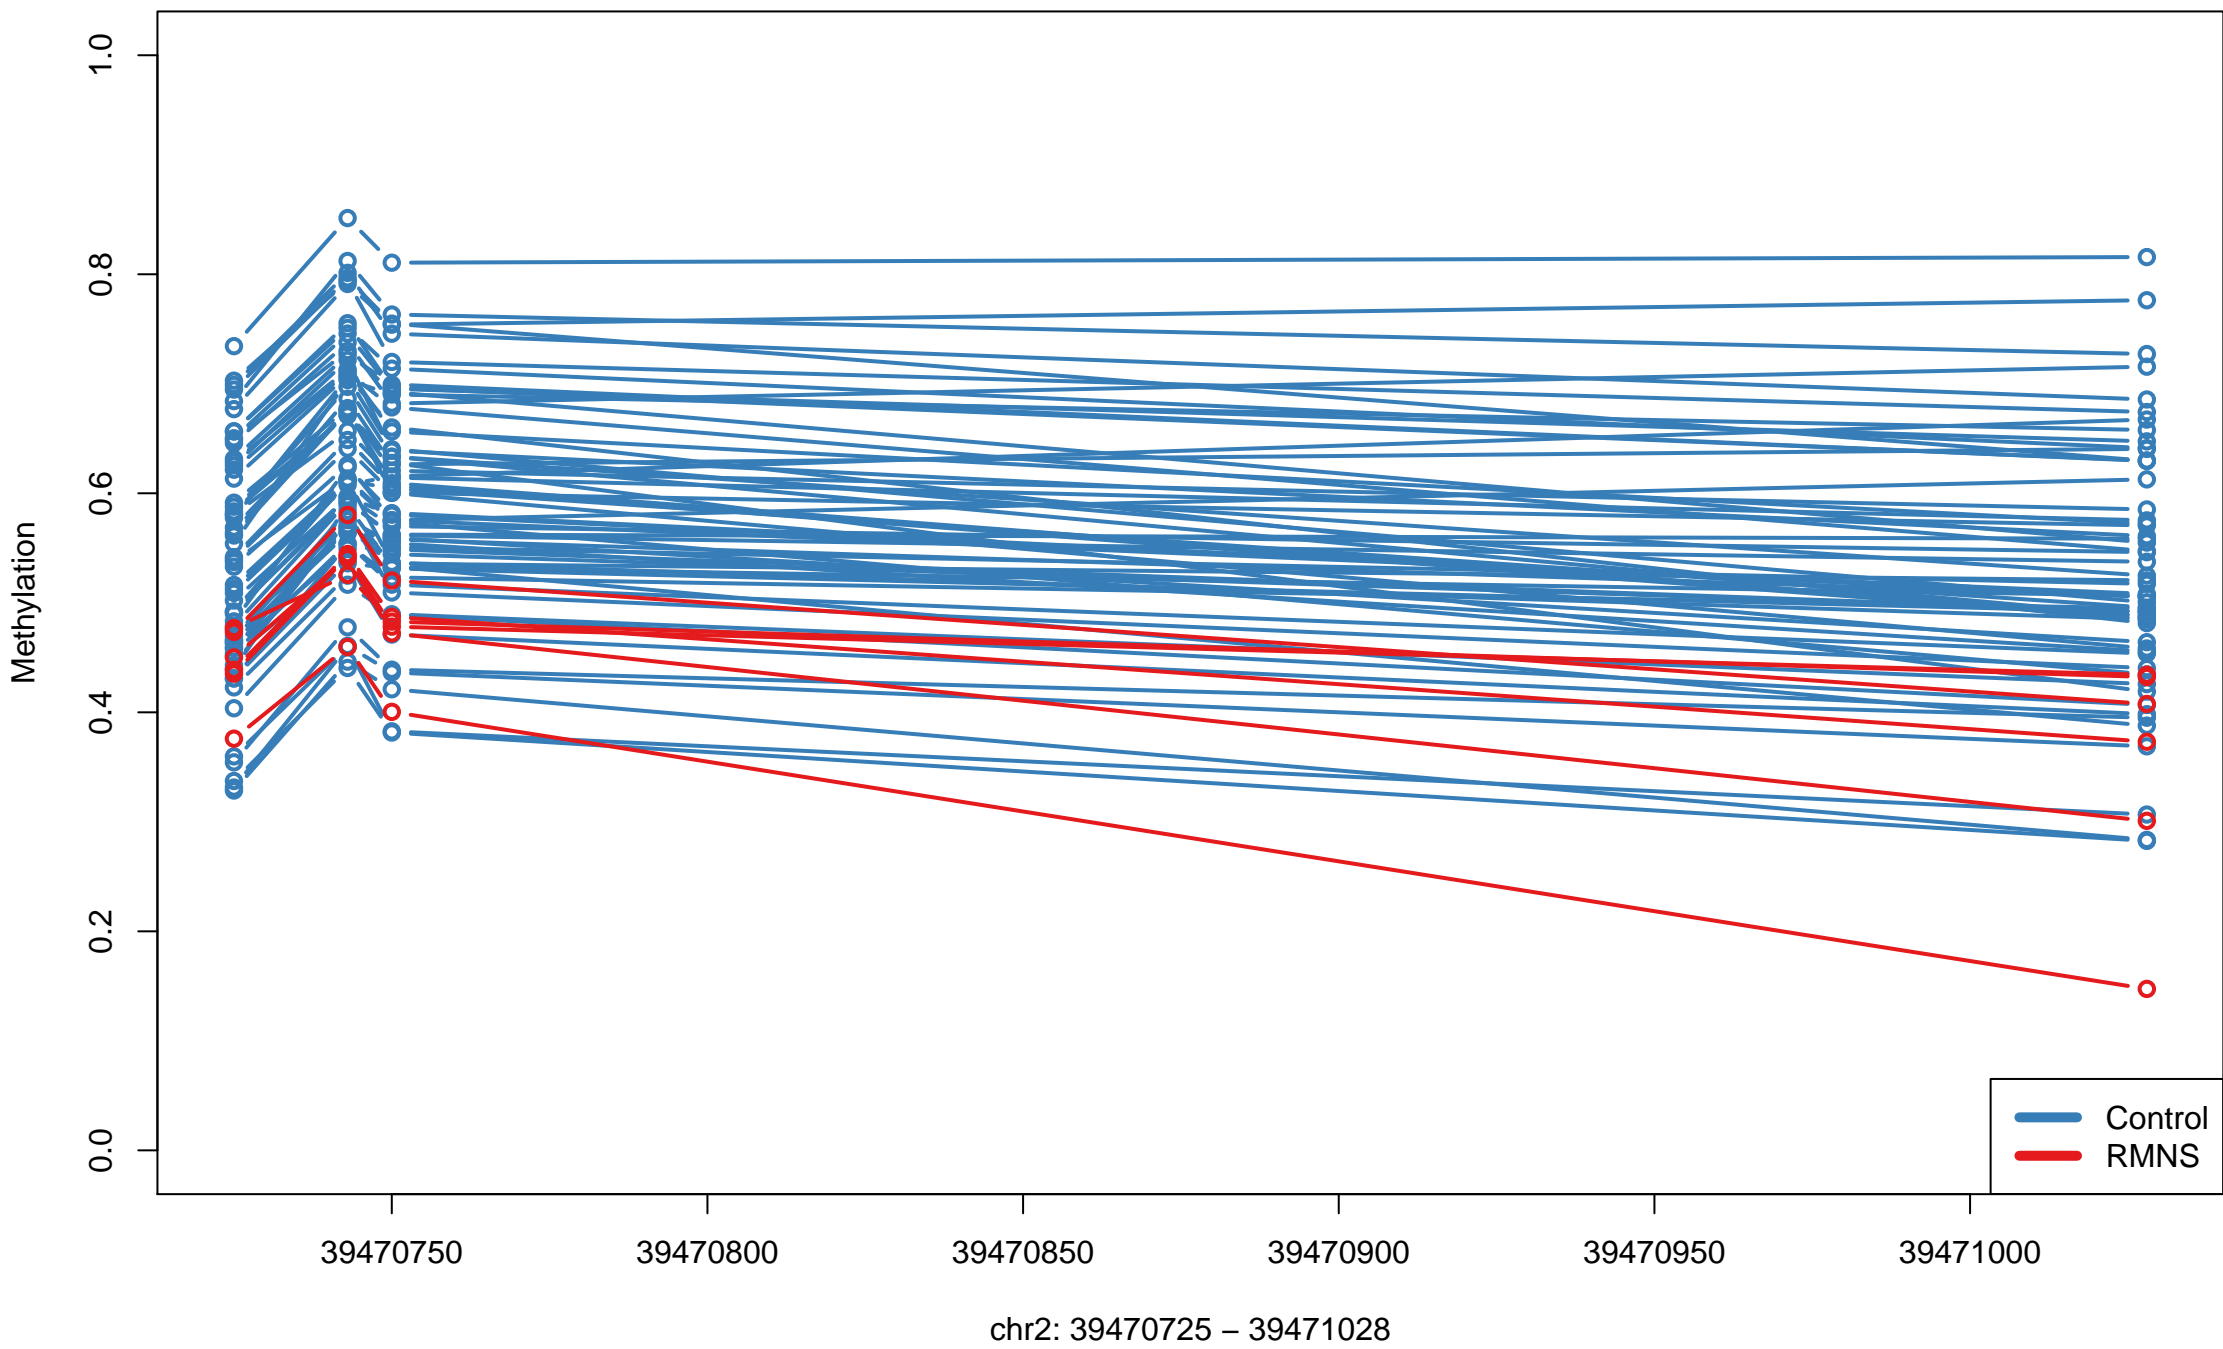

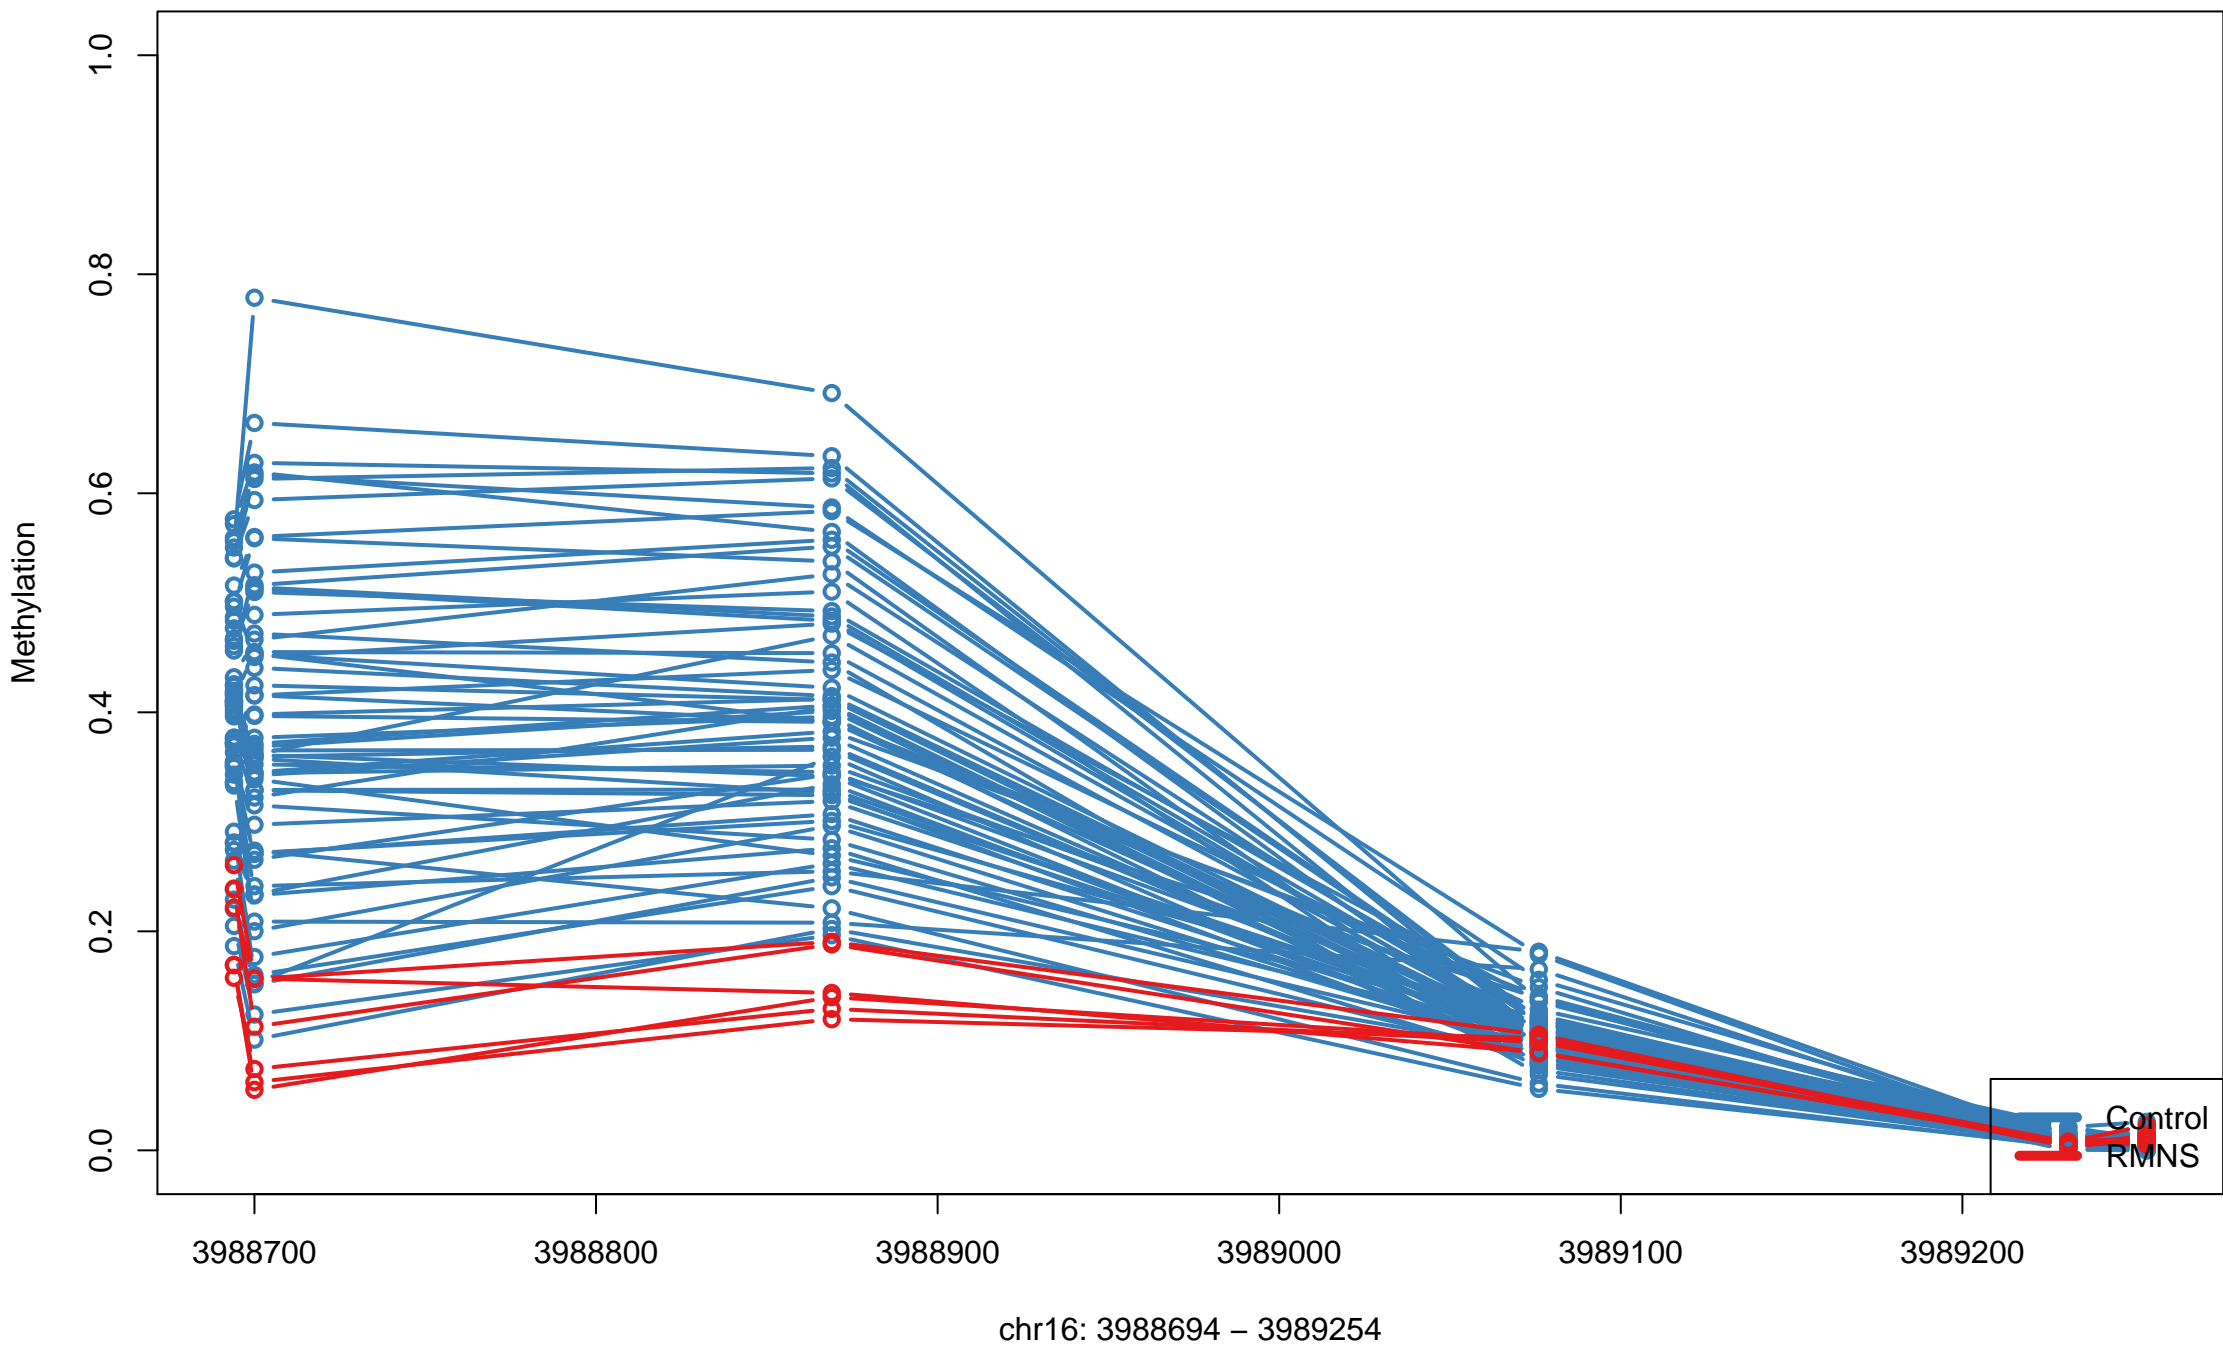

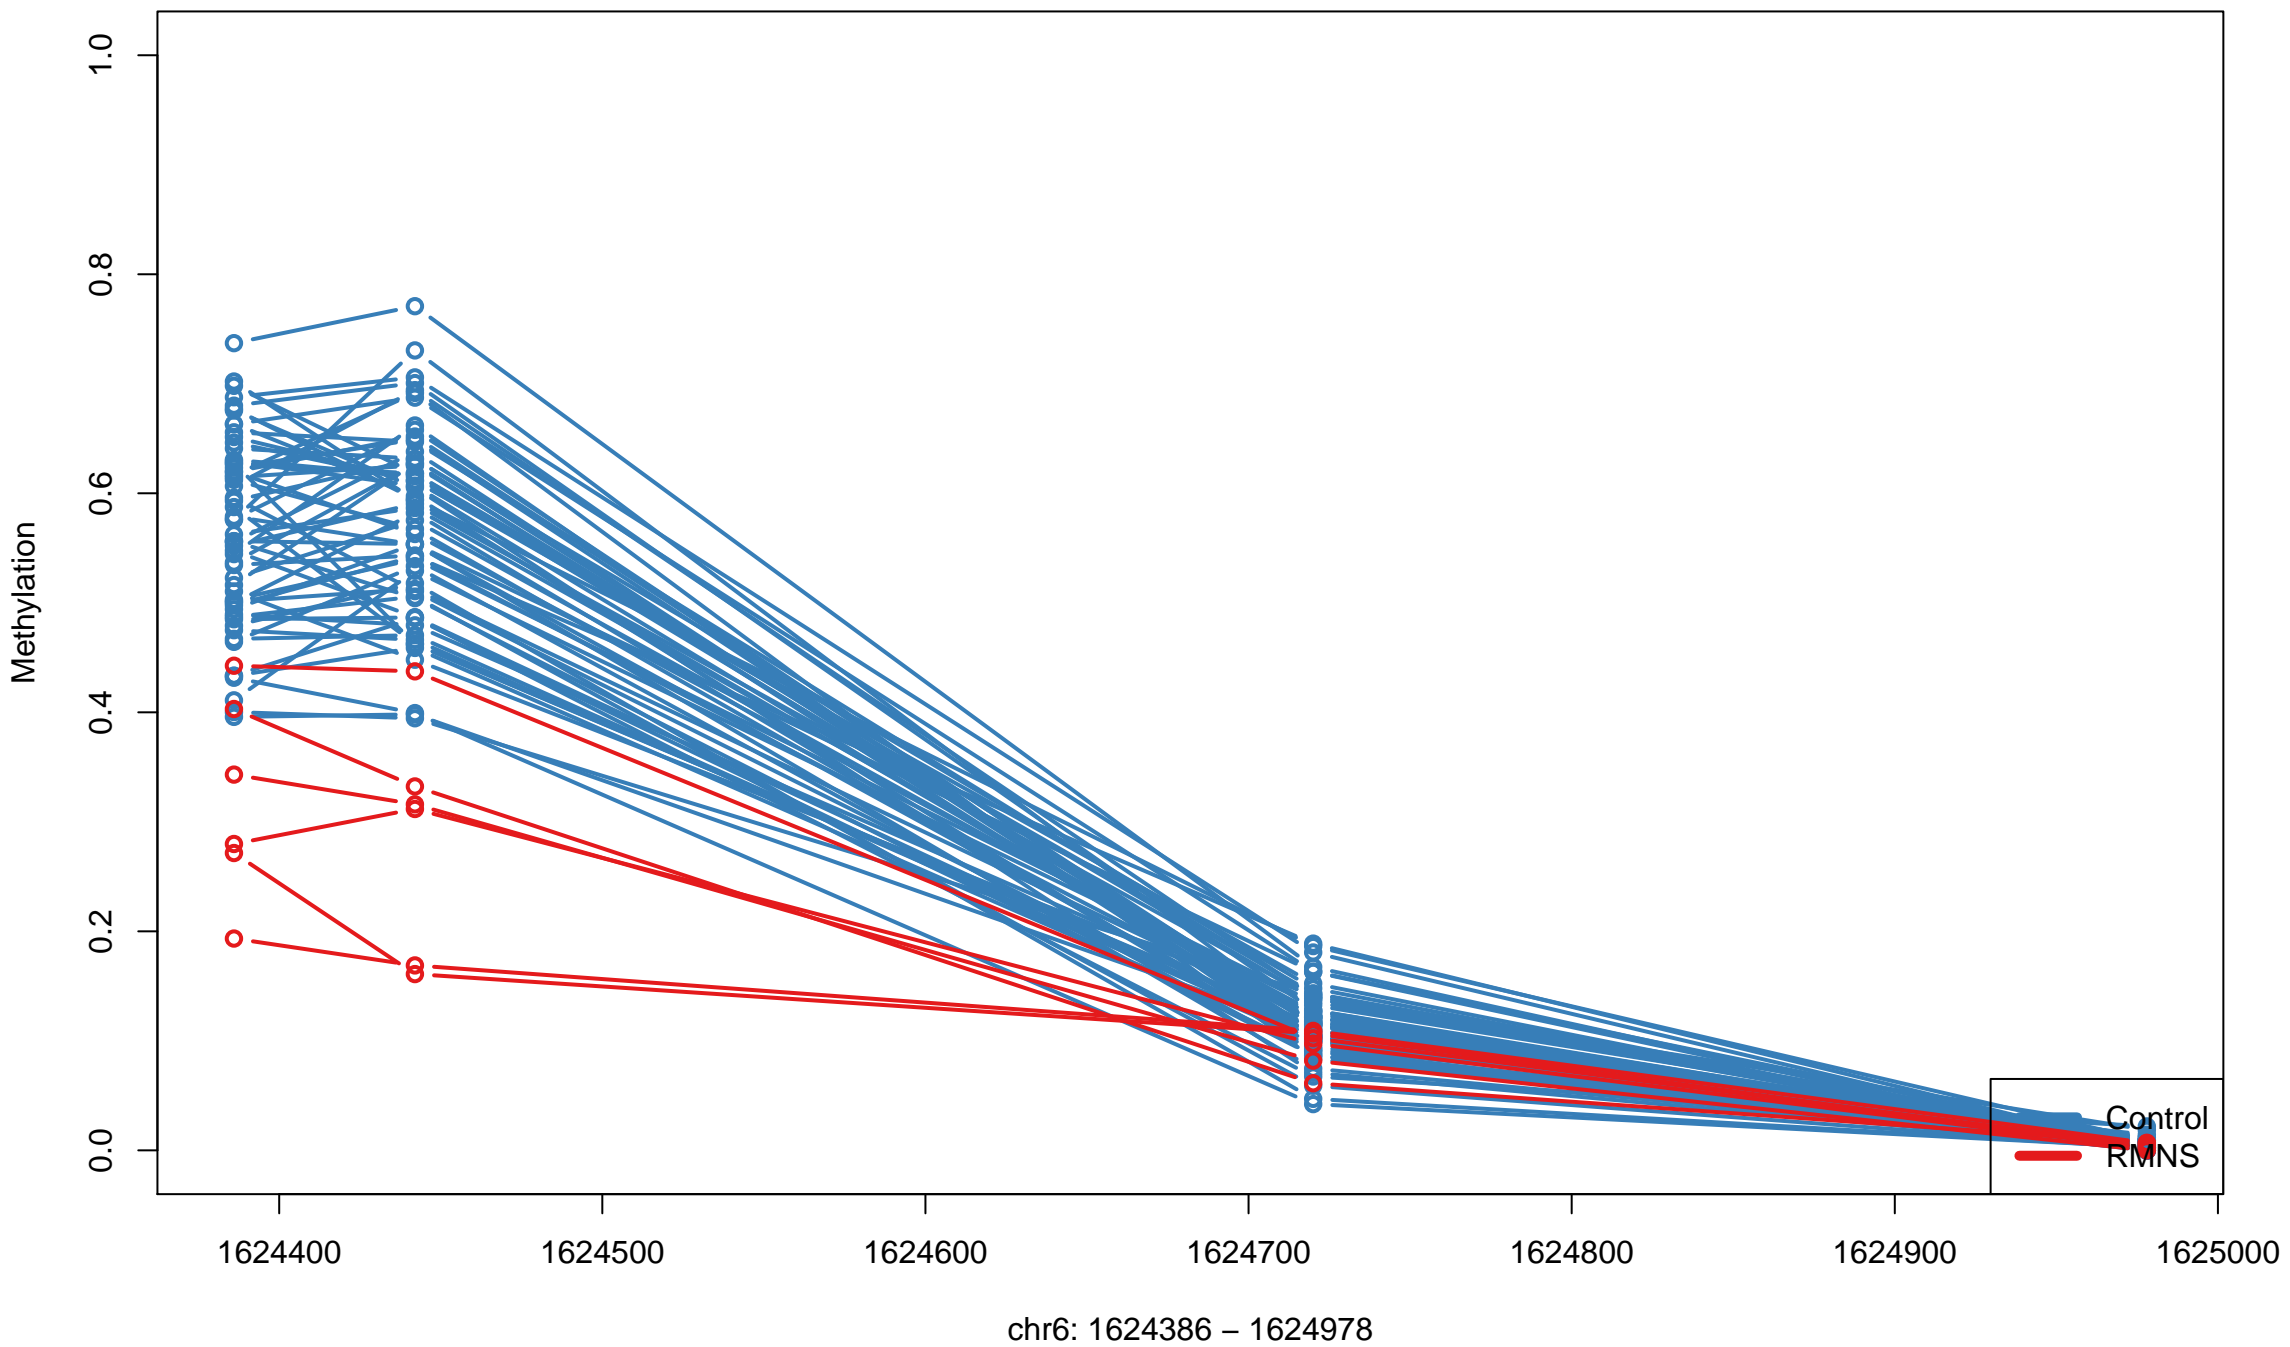

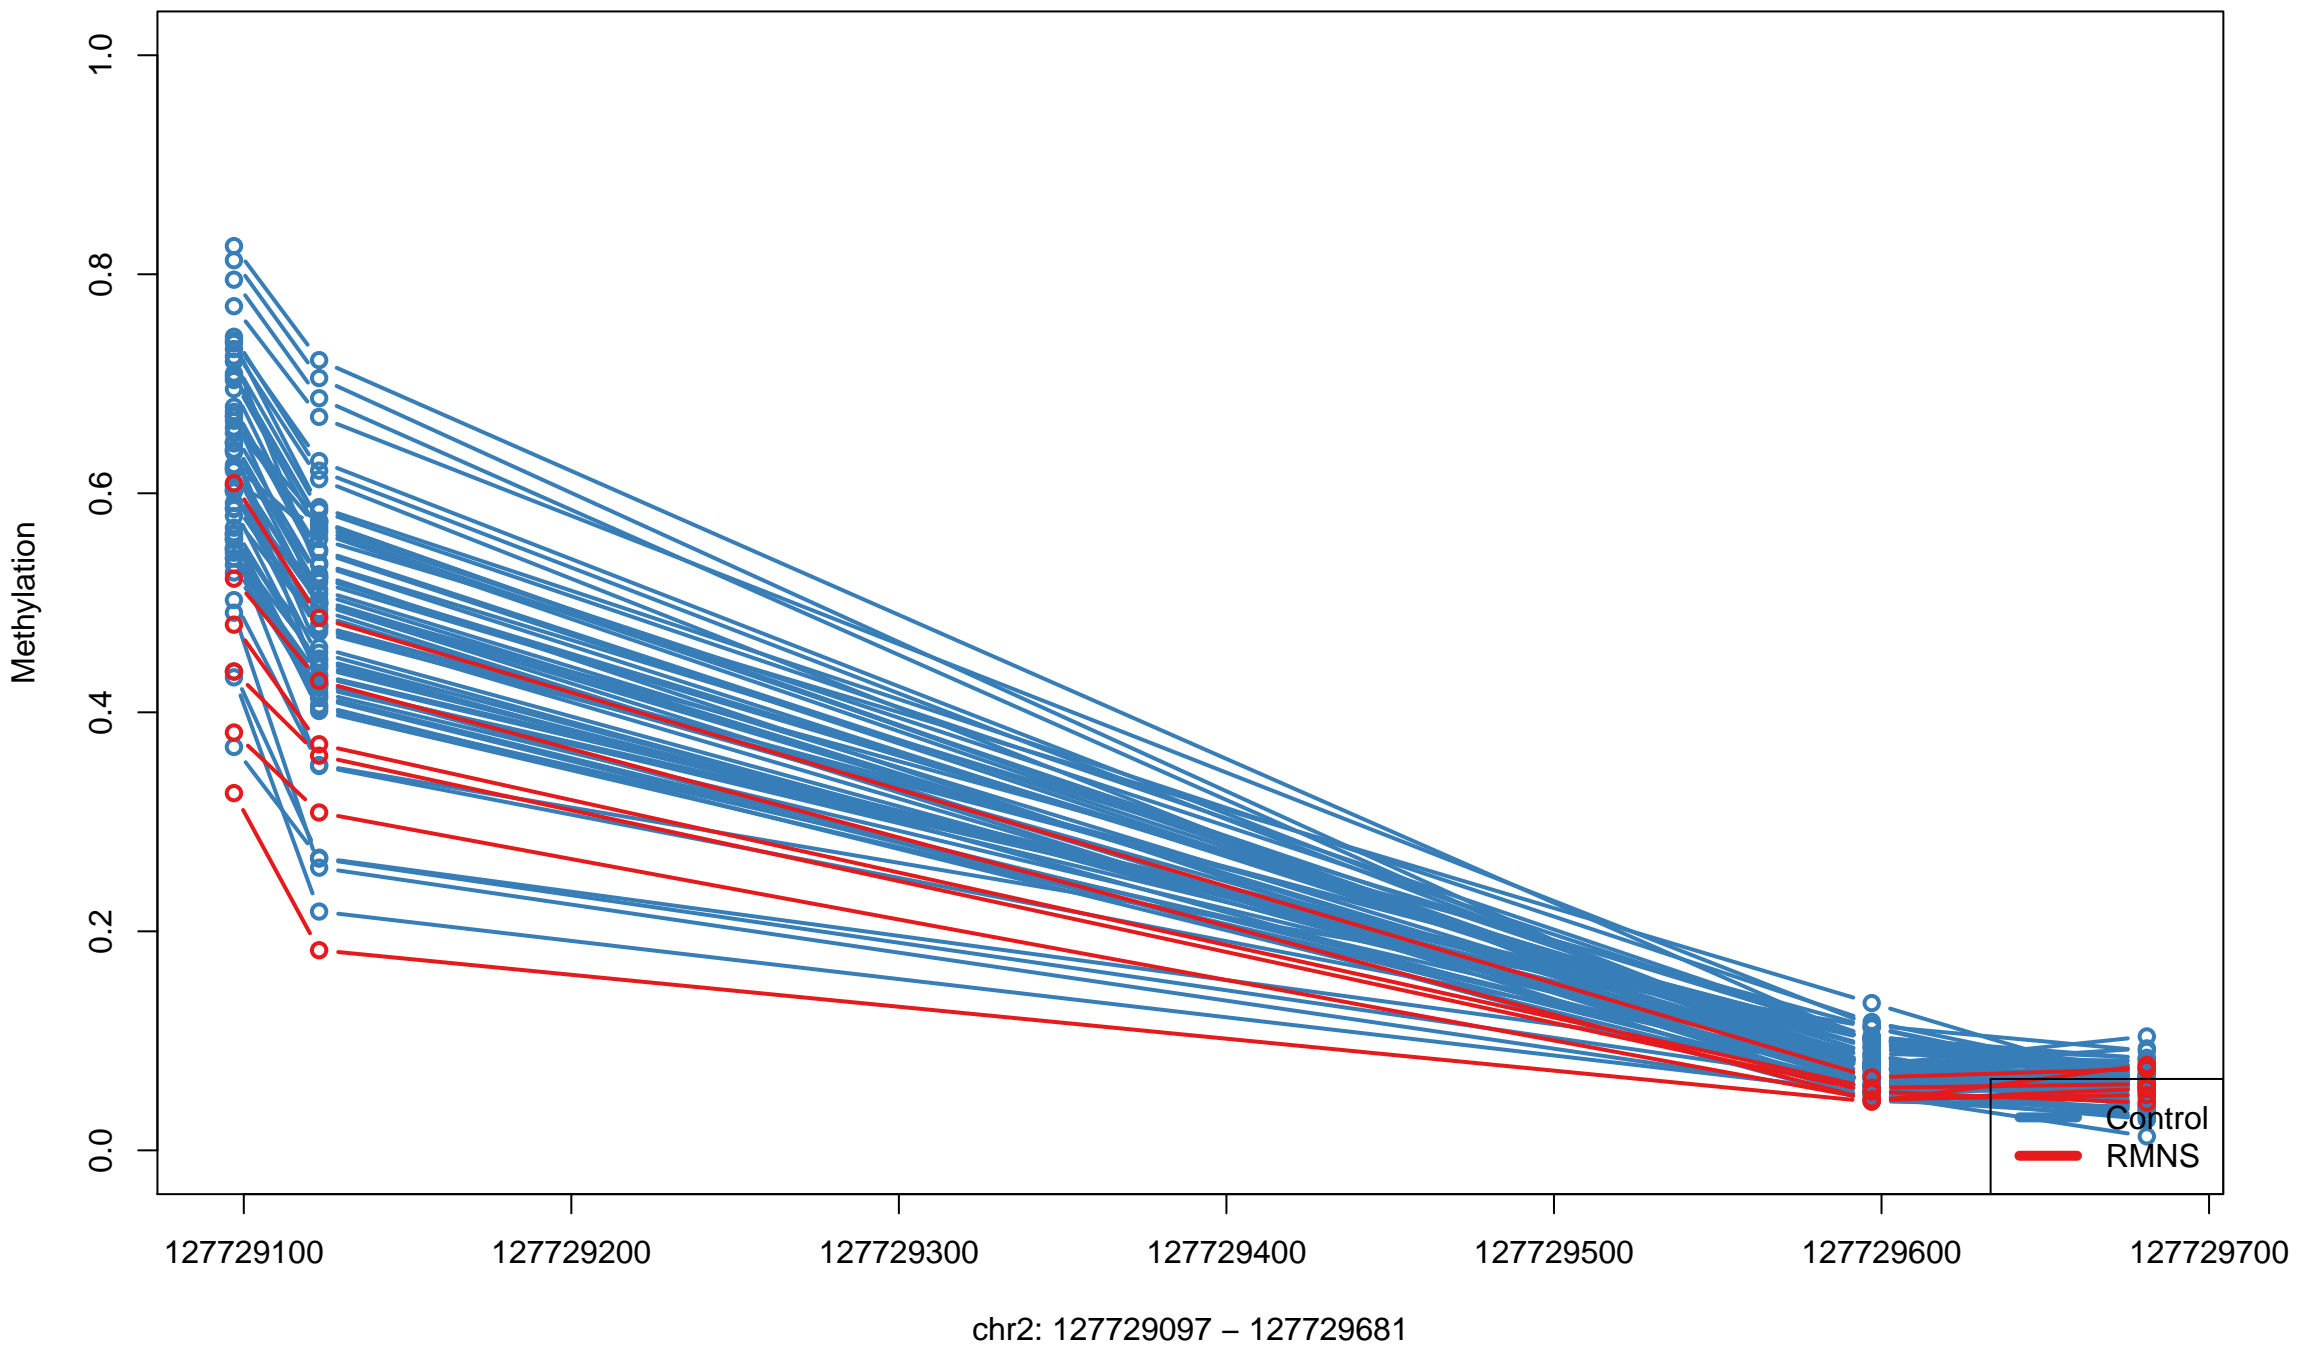

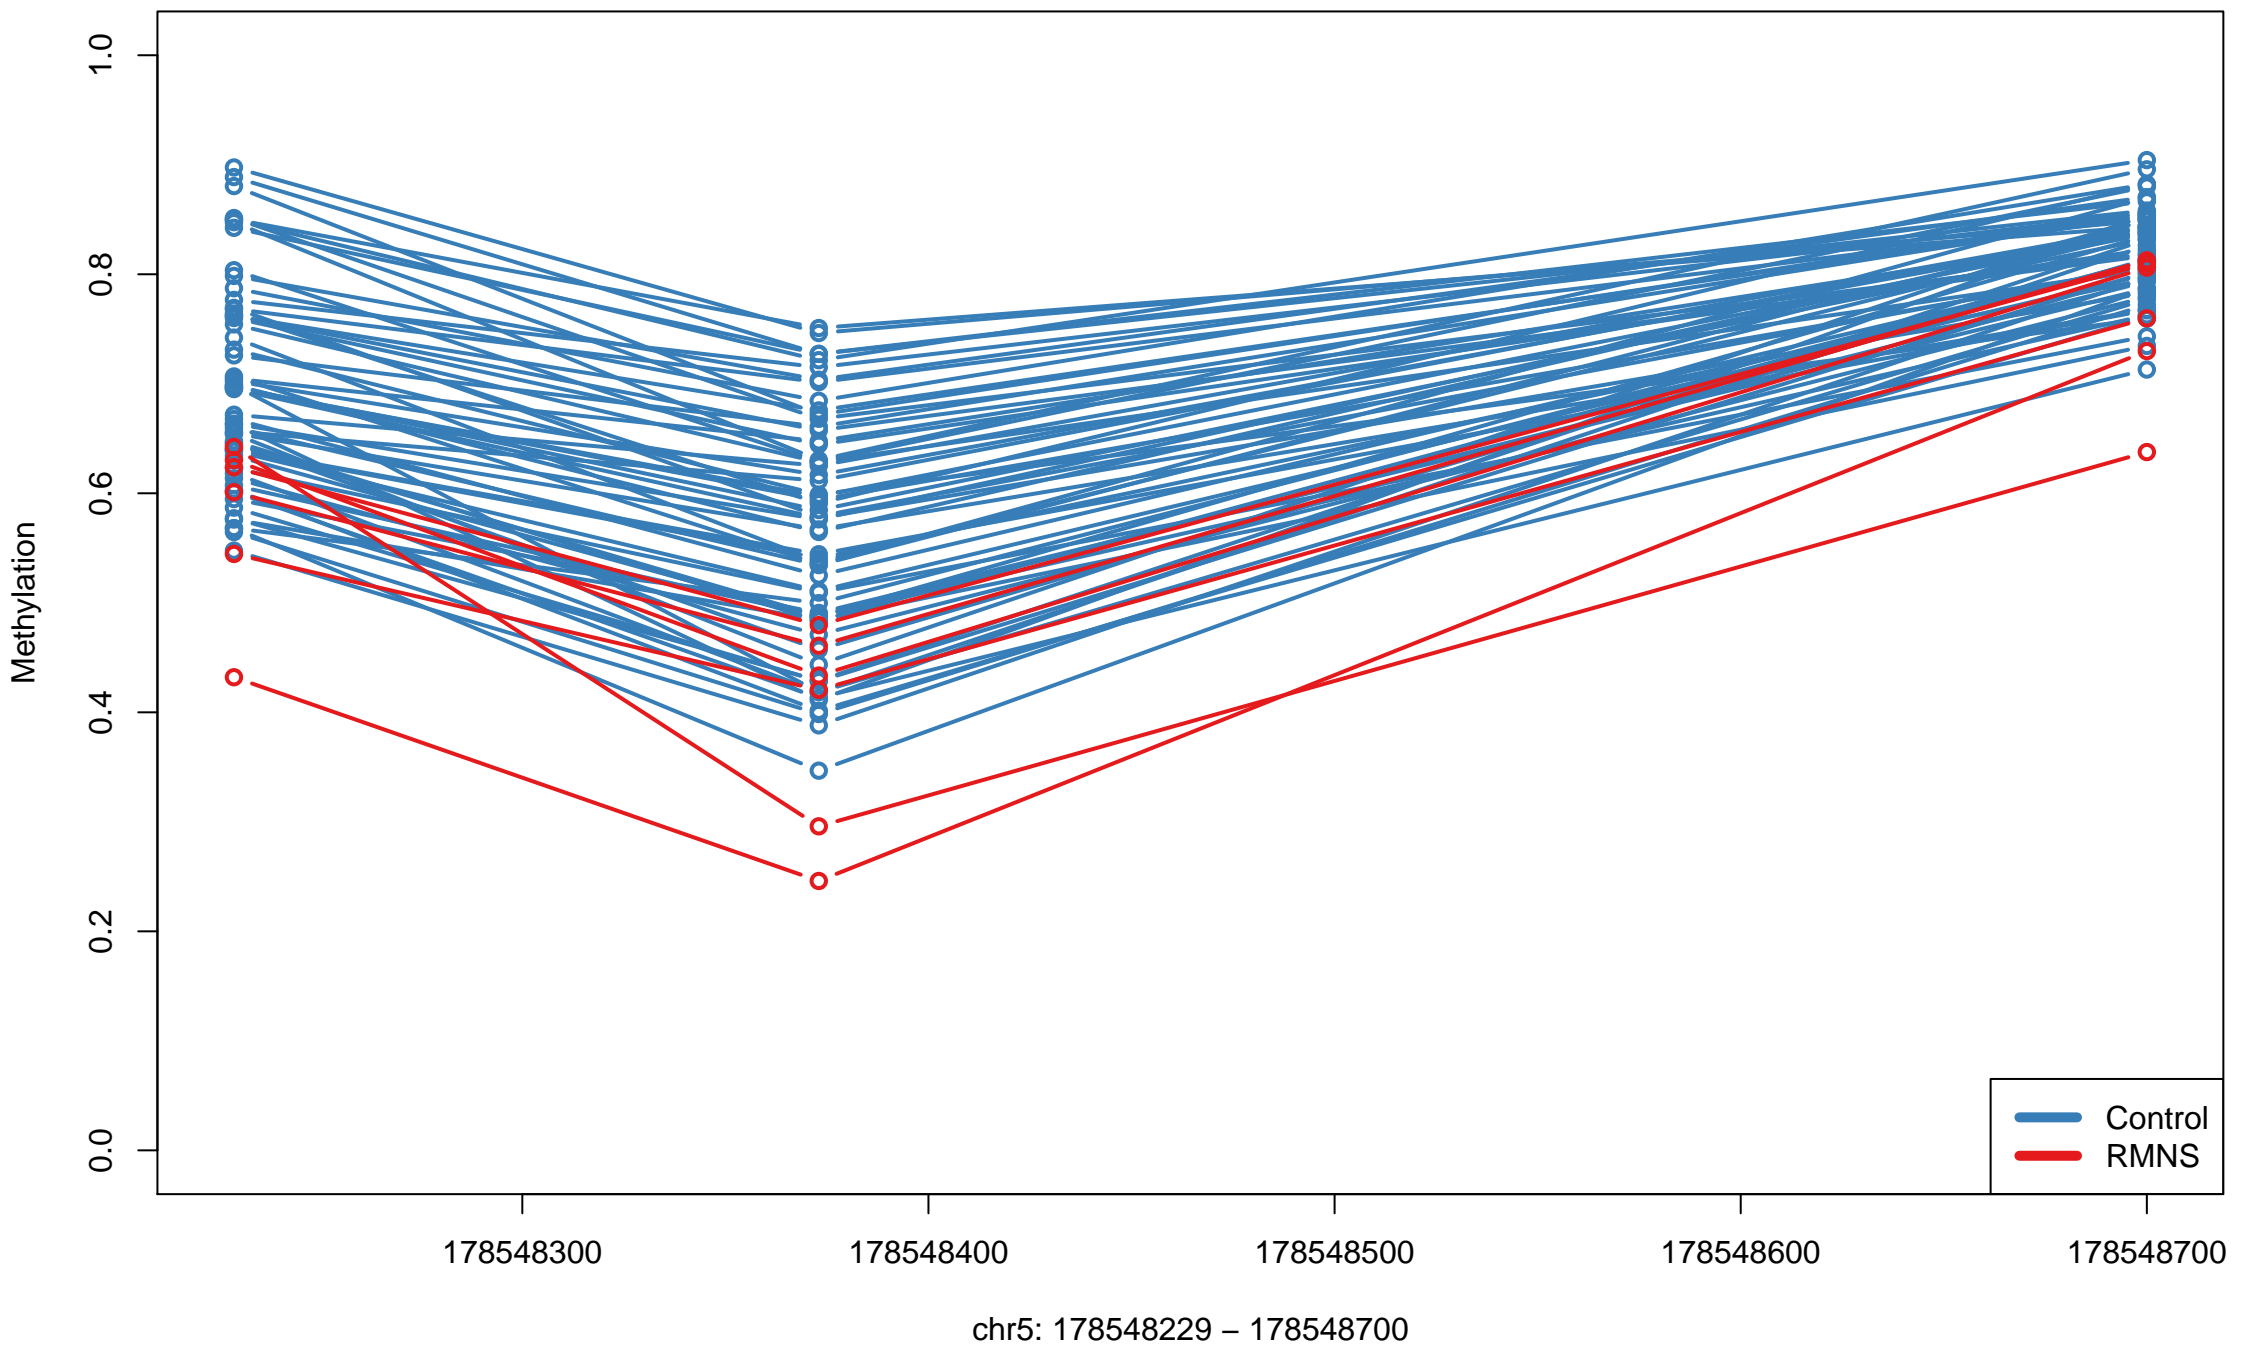

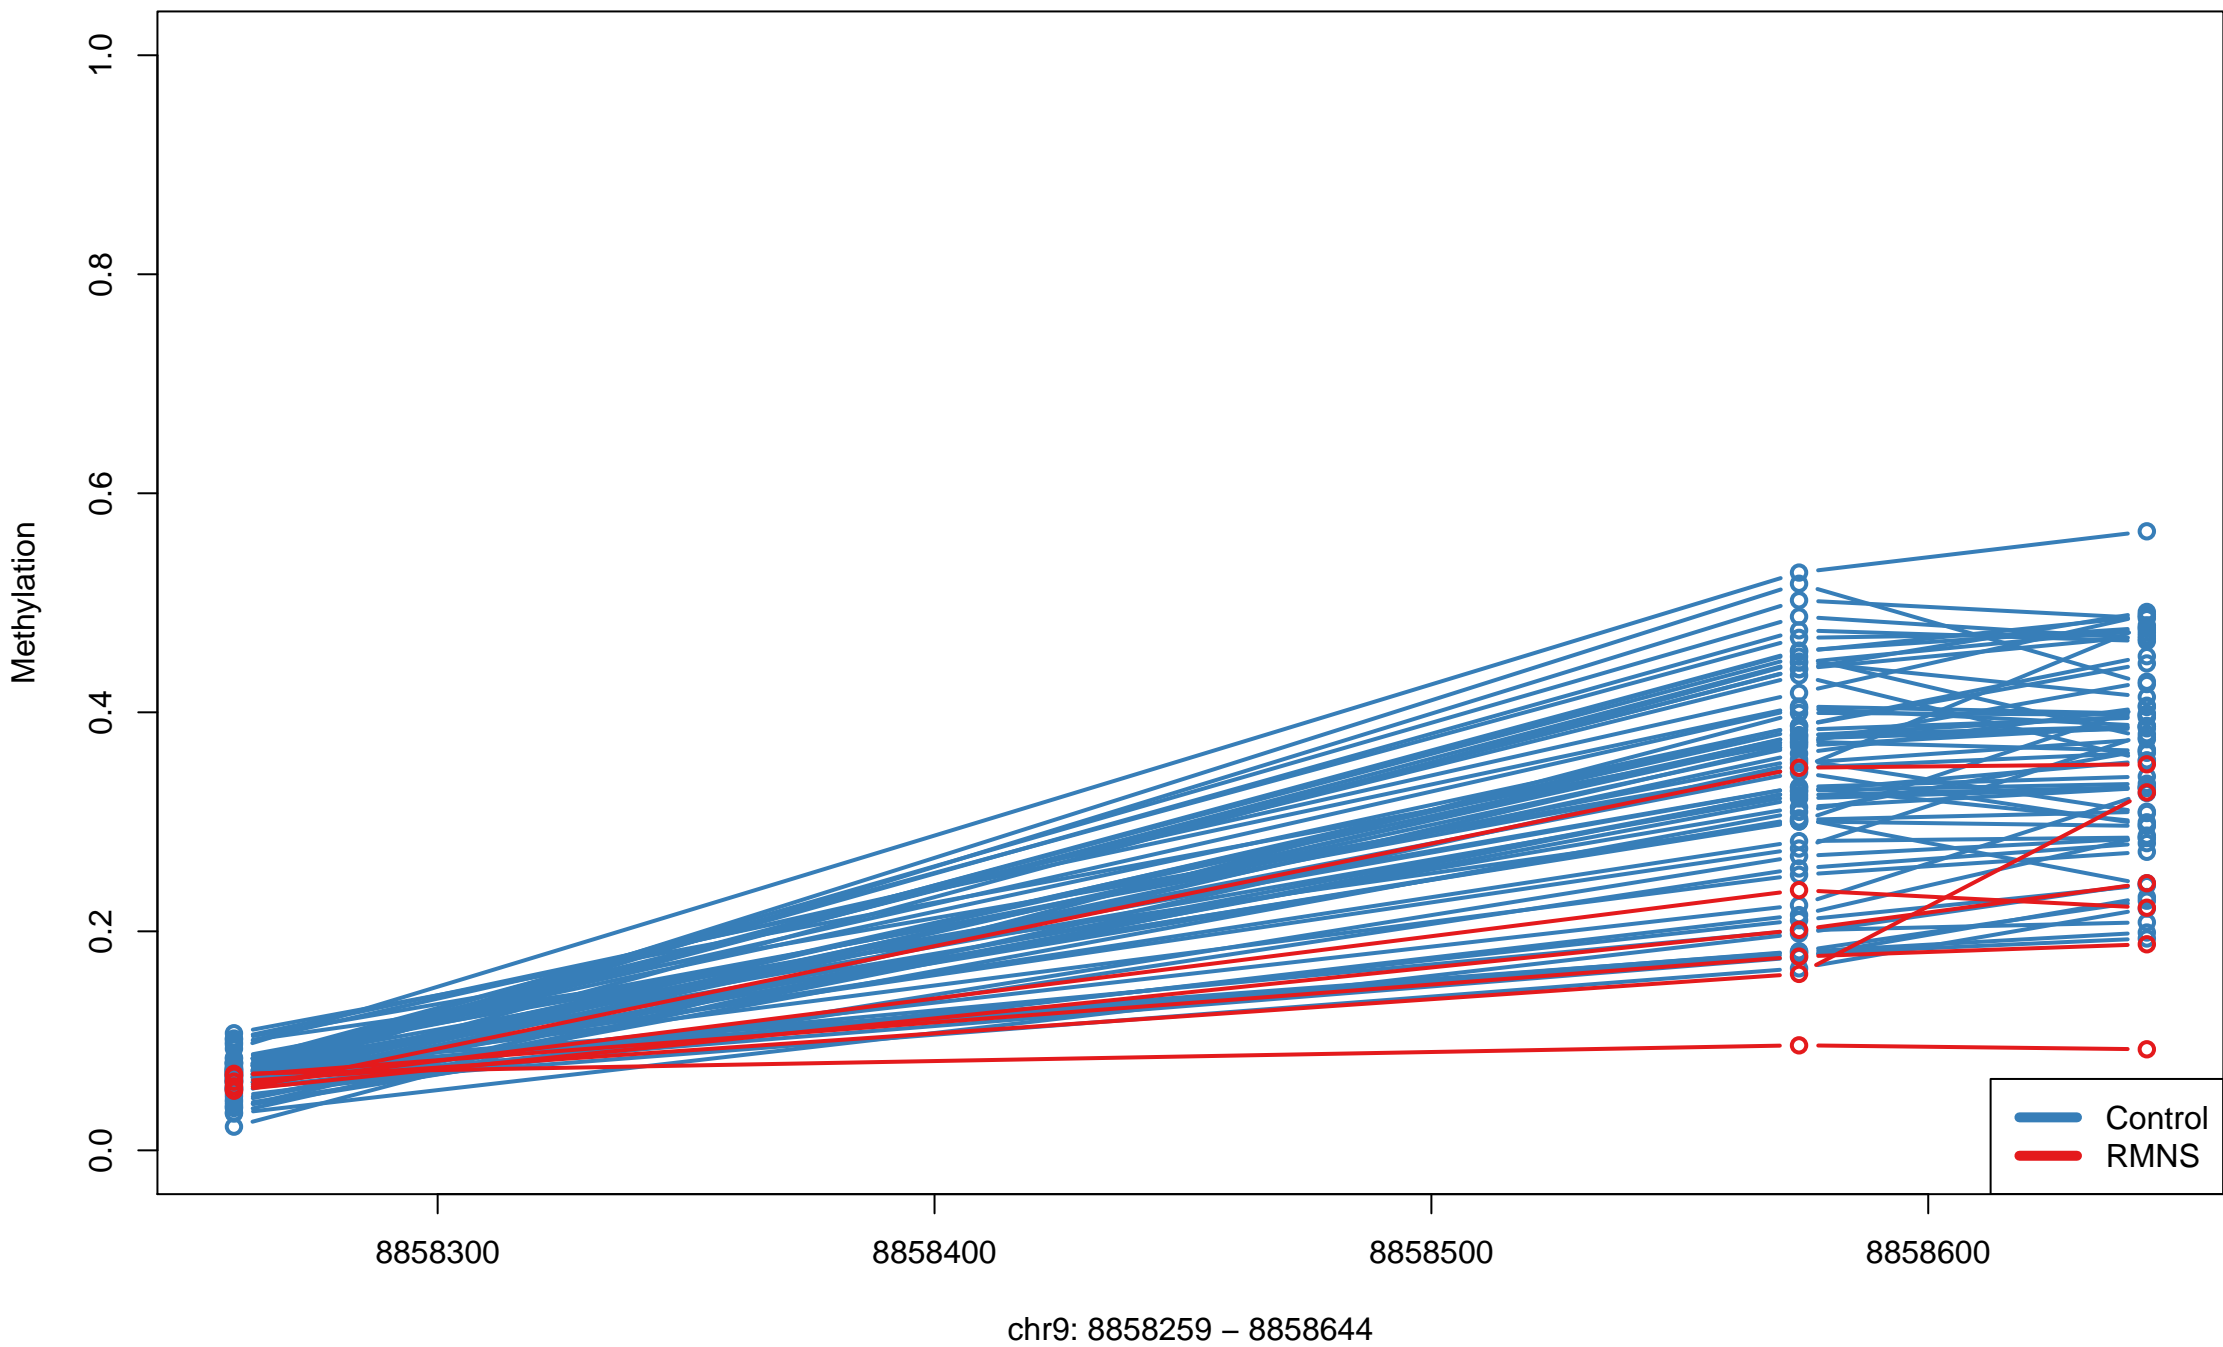

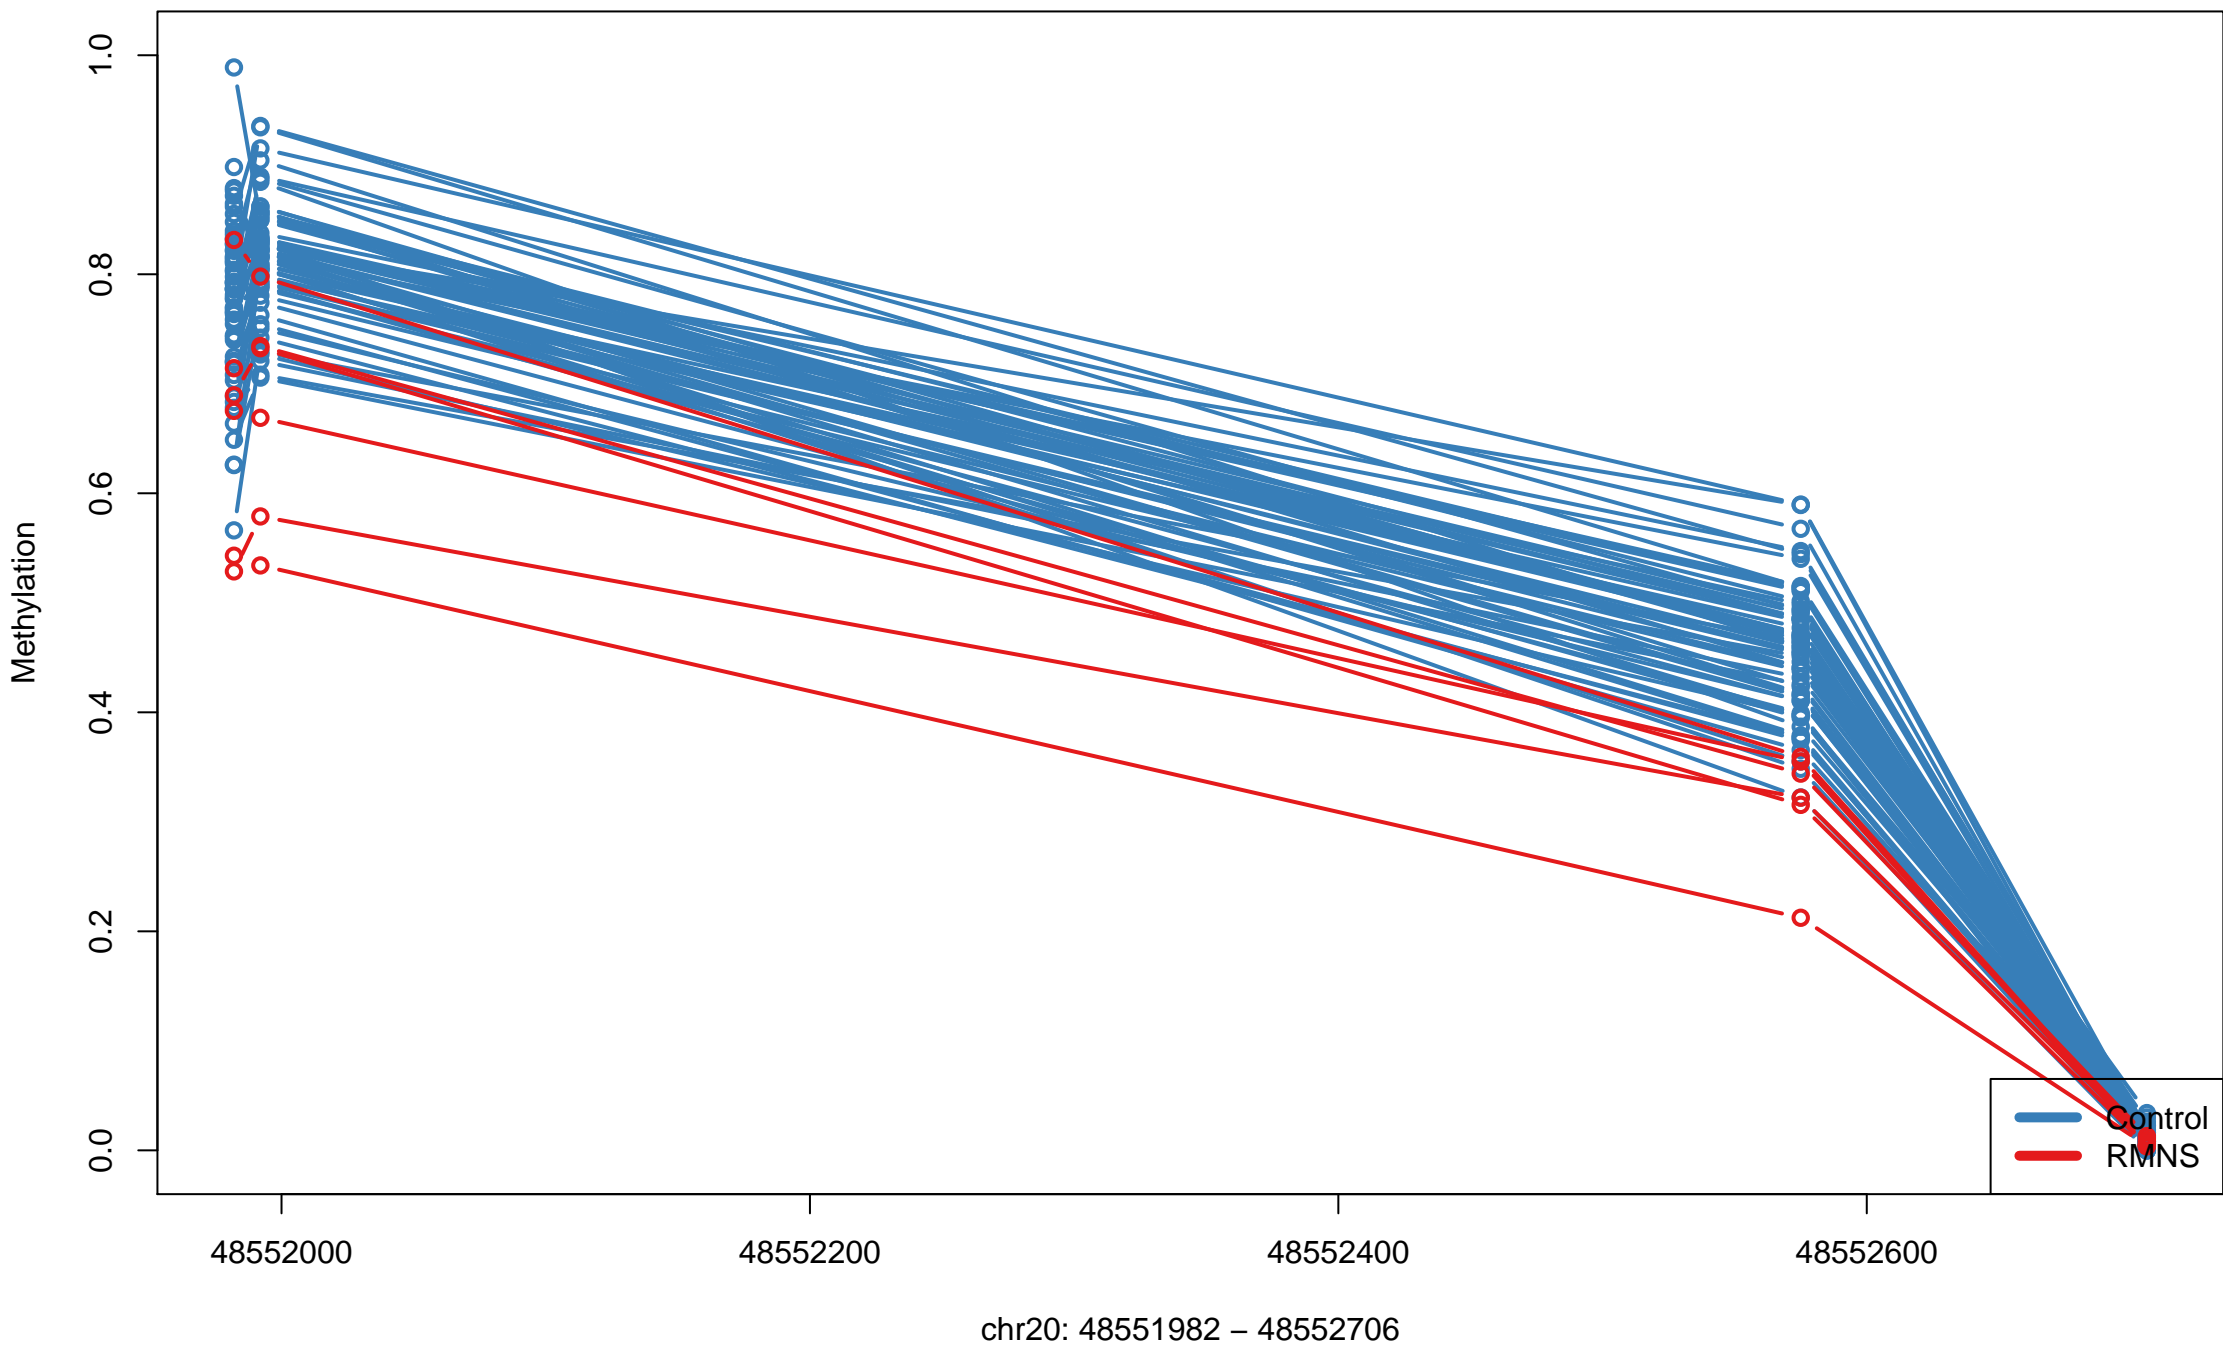

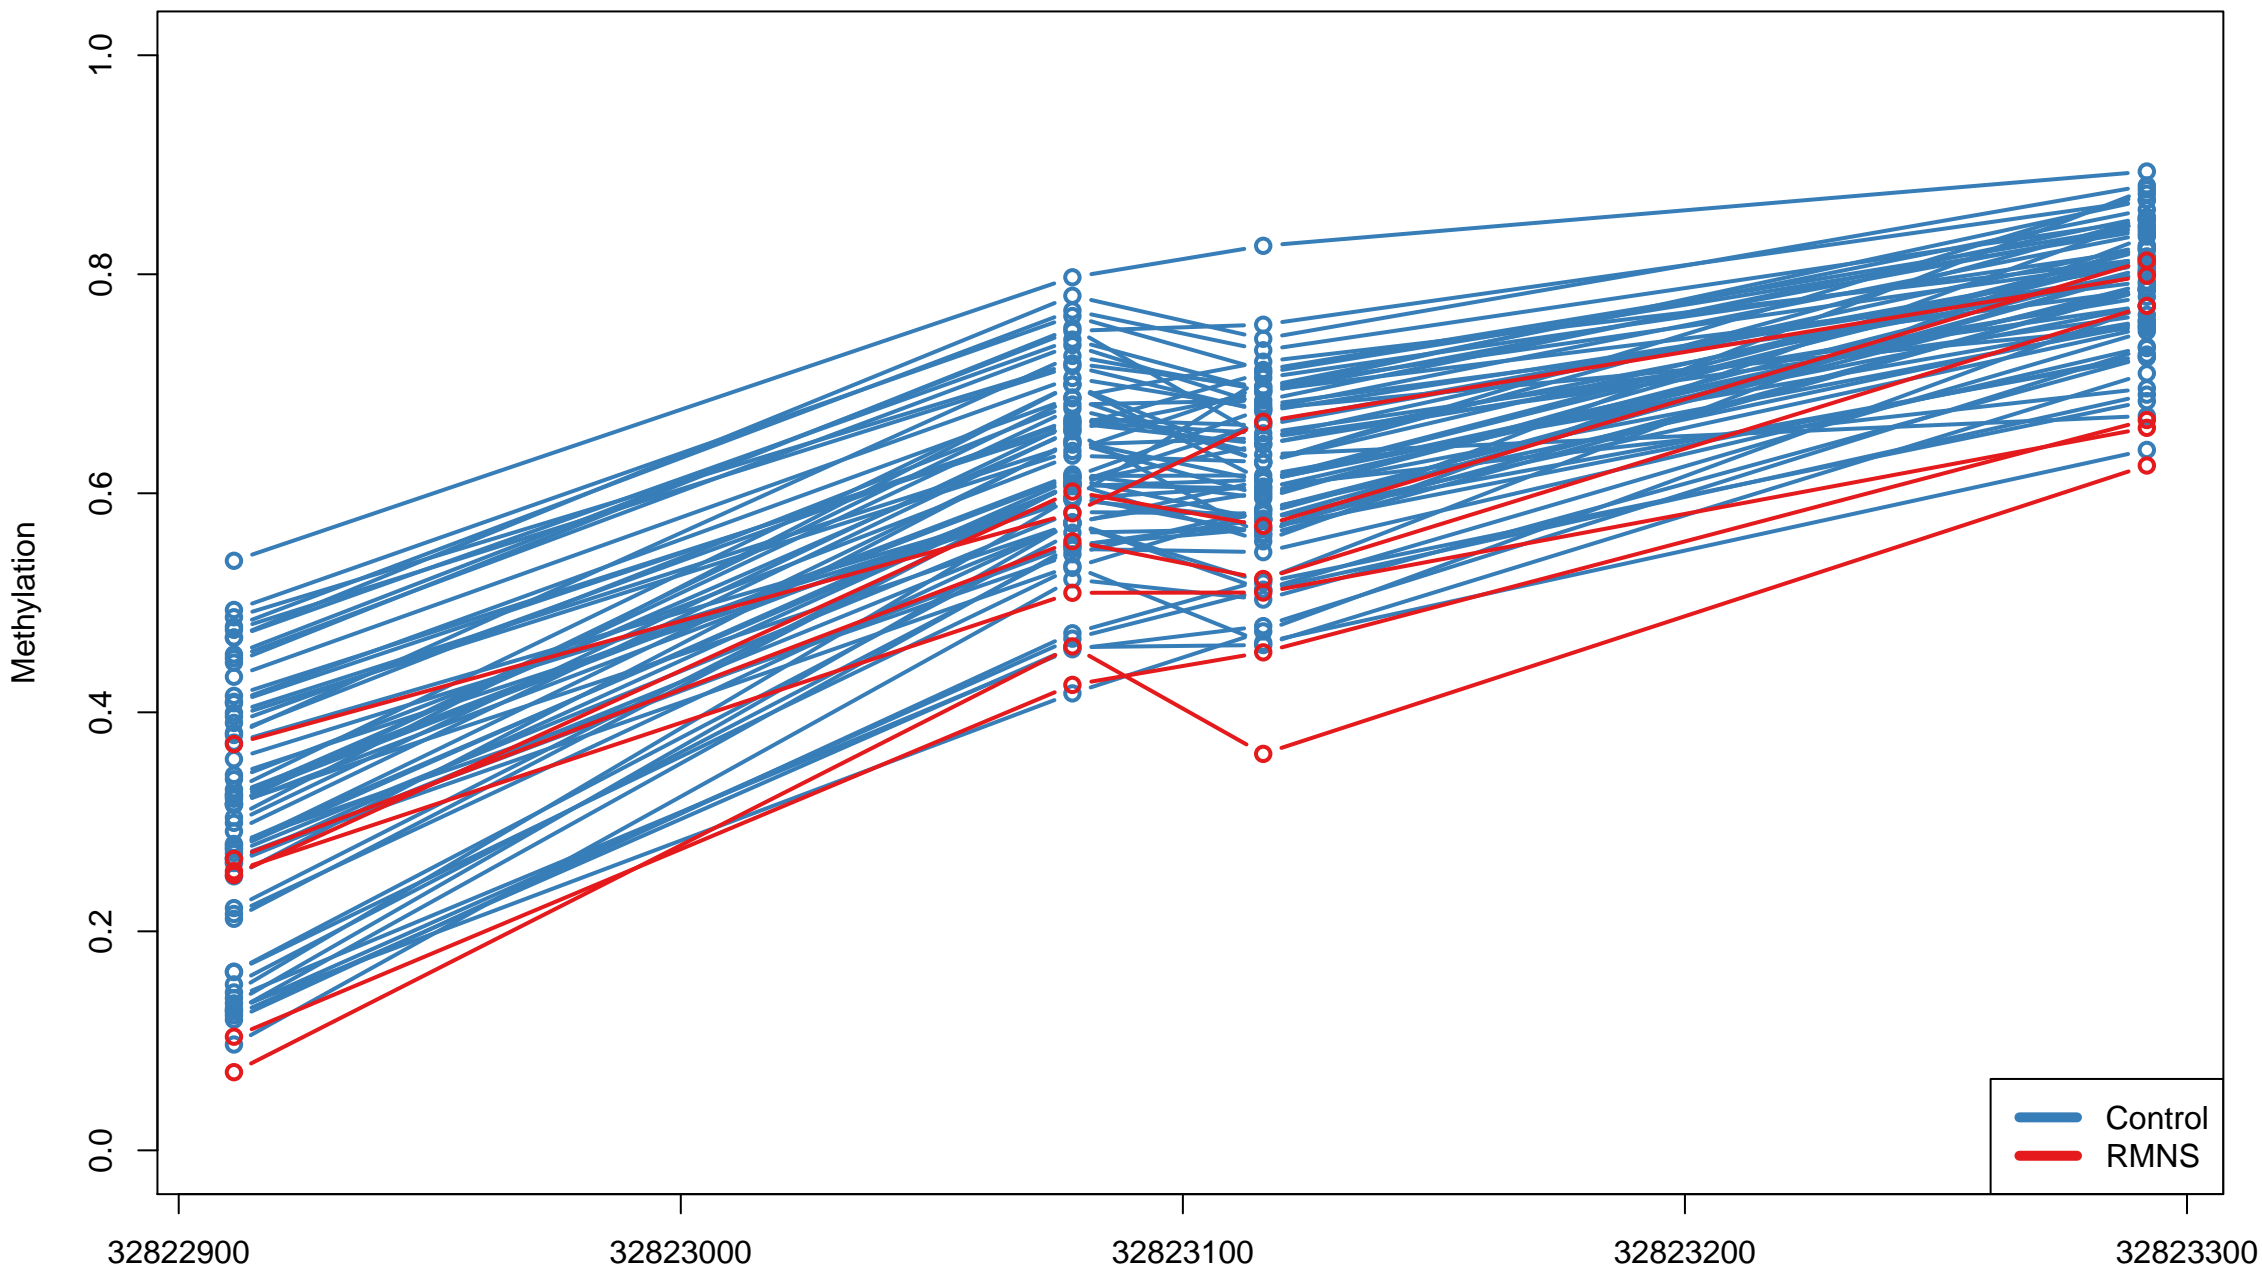

chr6: 32822911 – 32823292



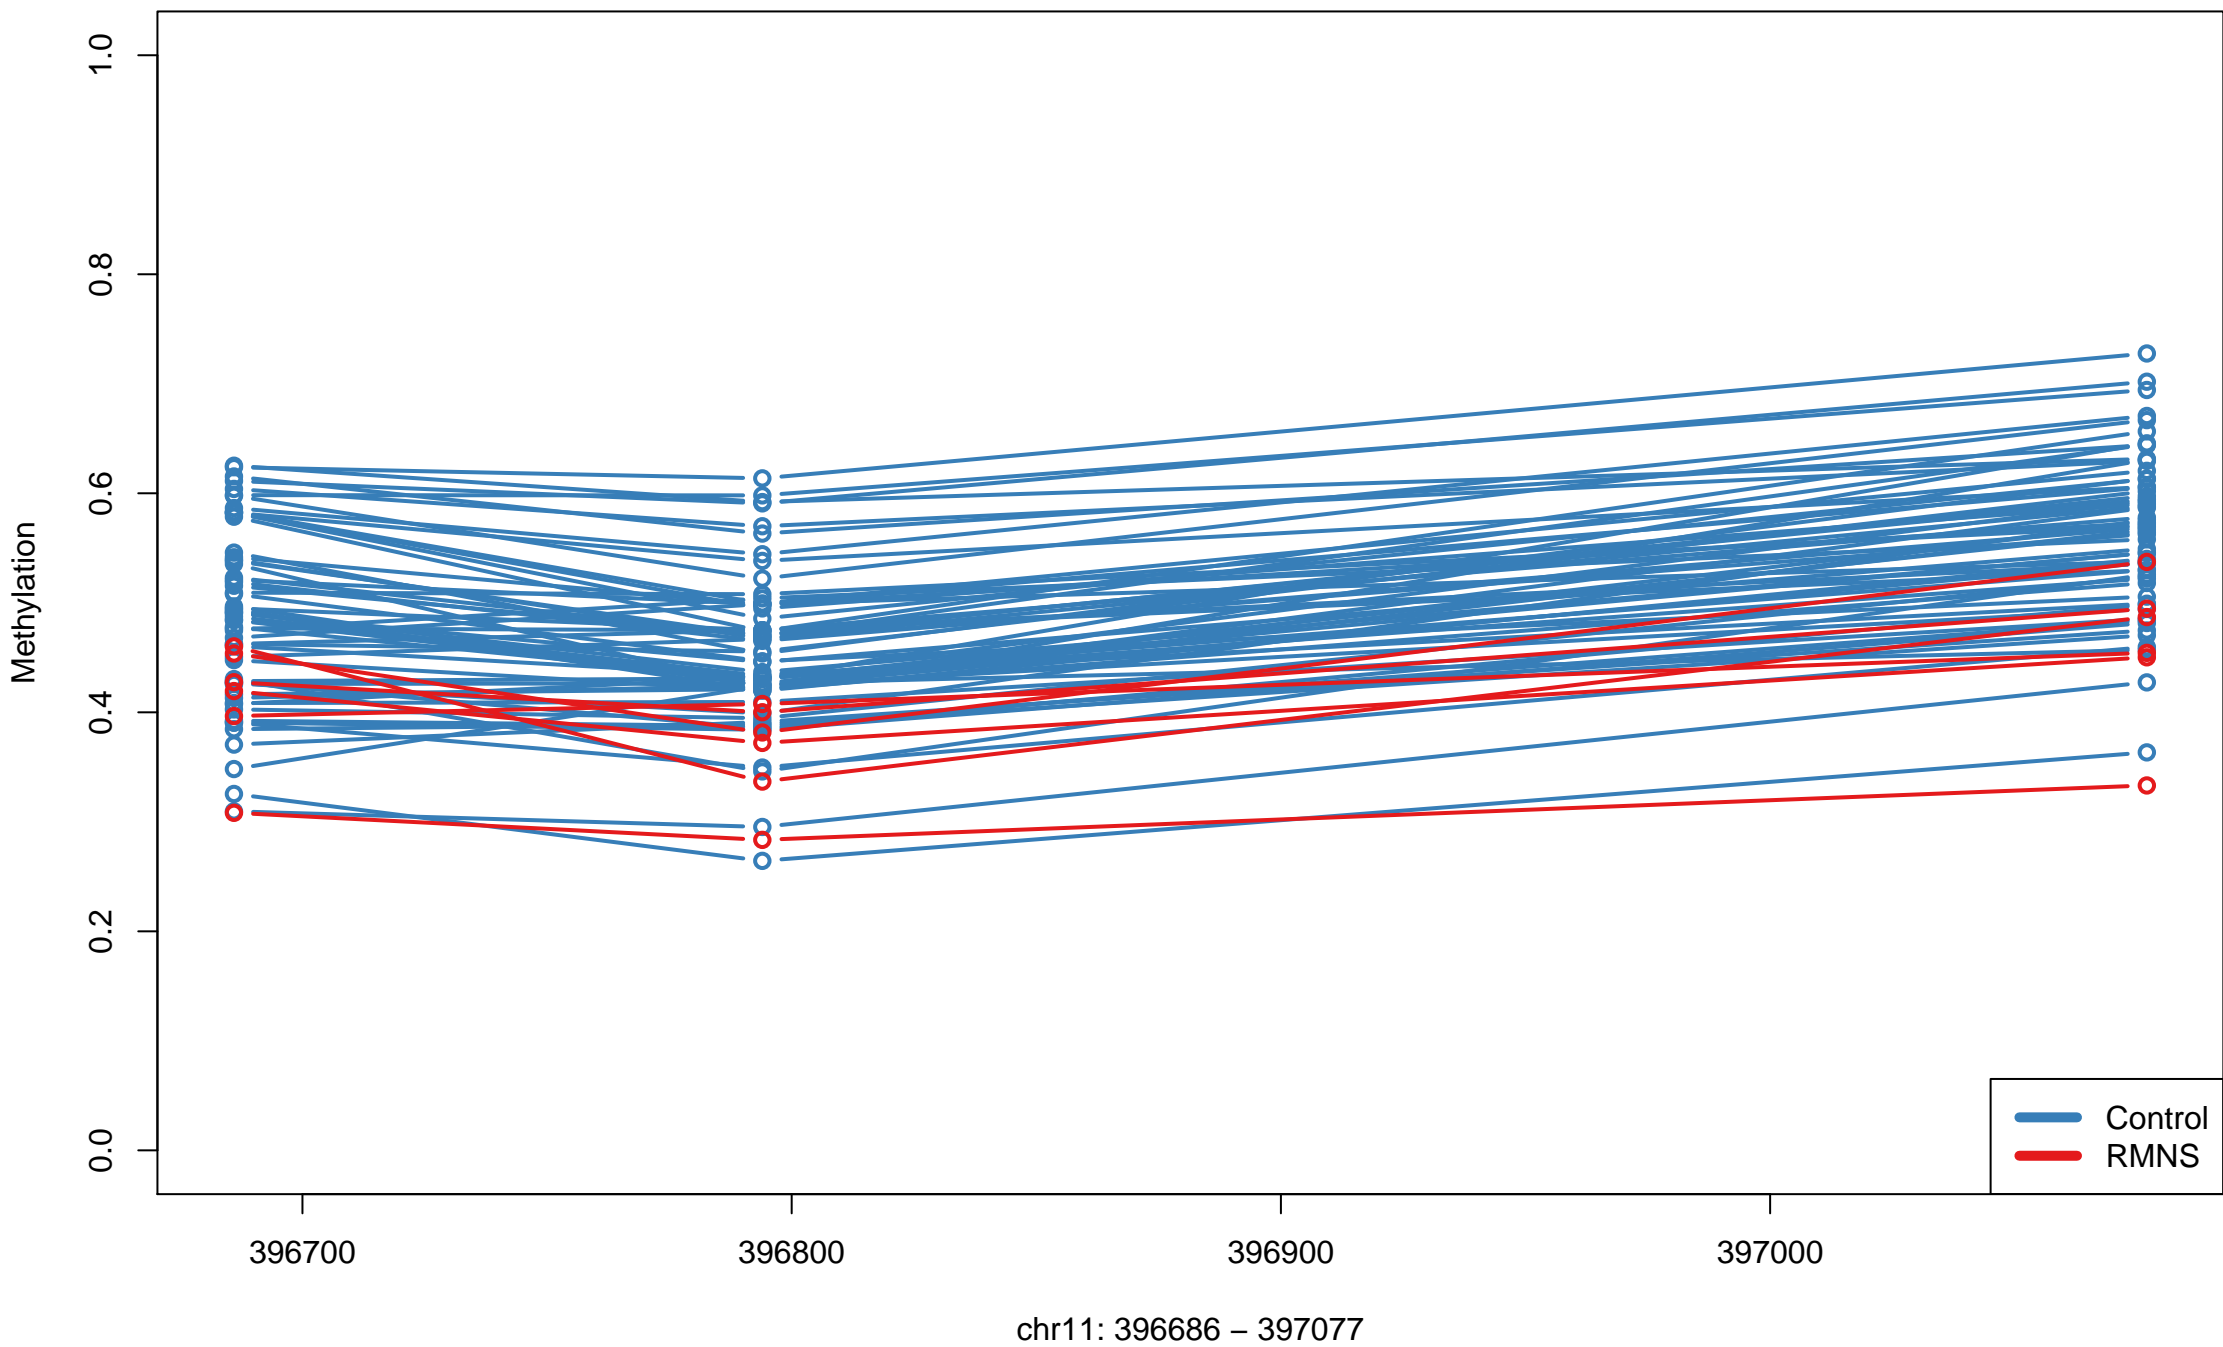

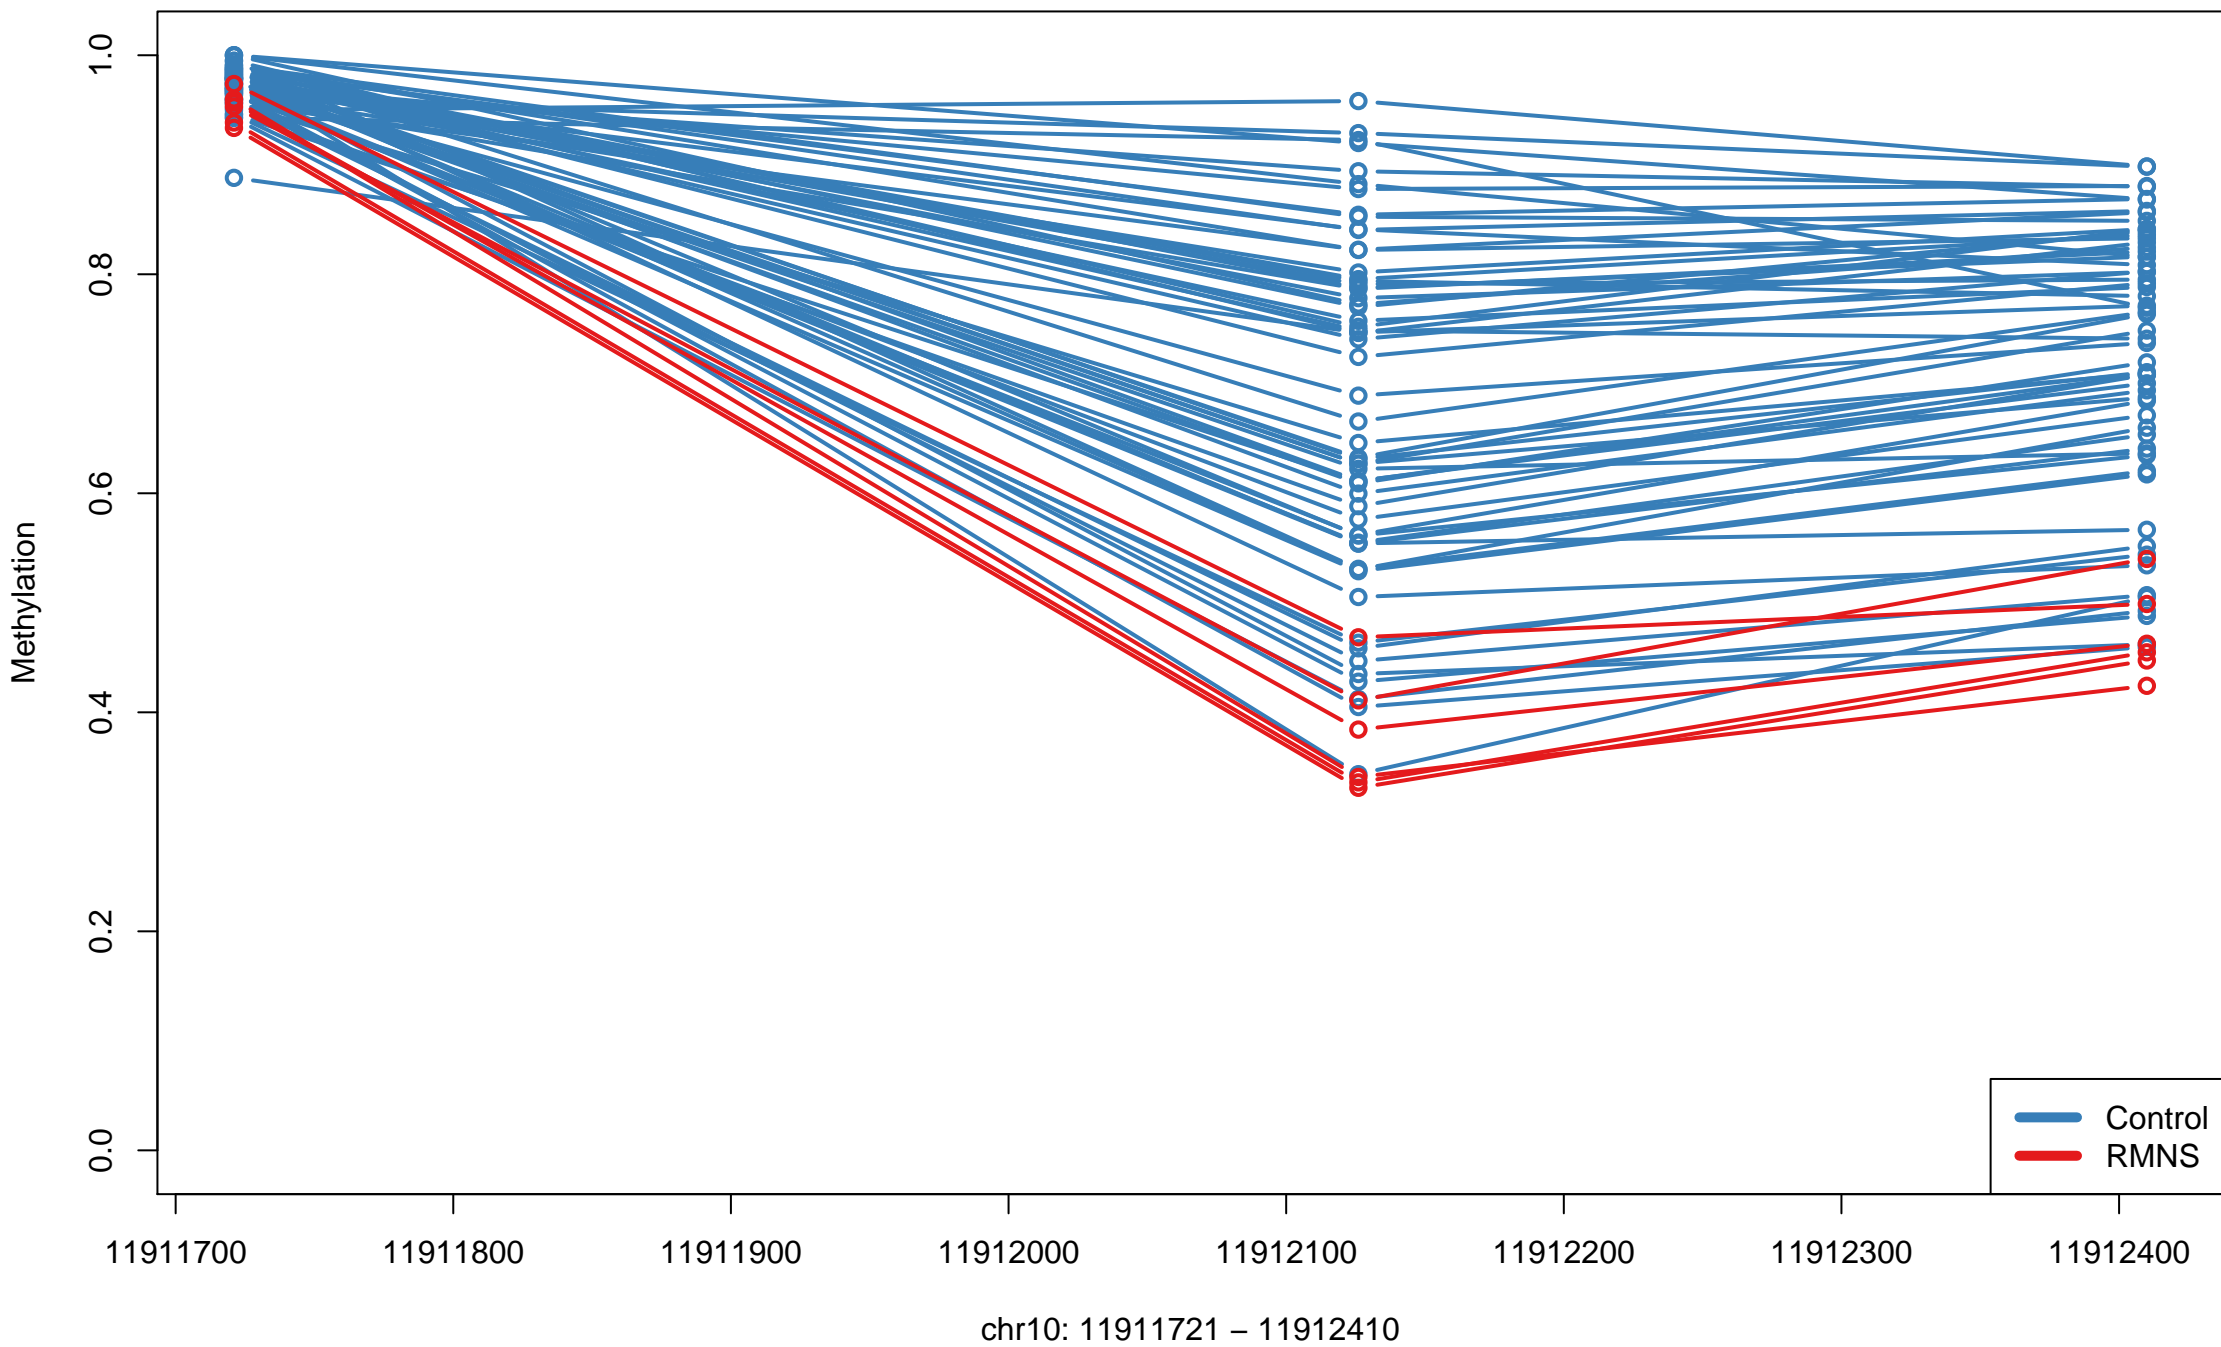

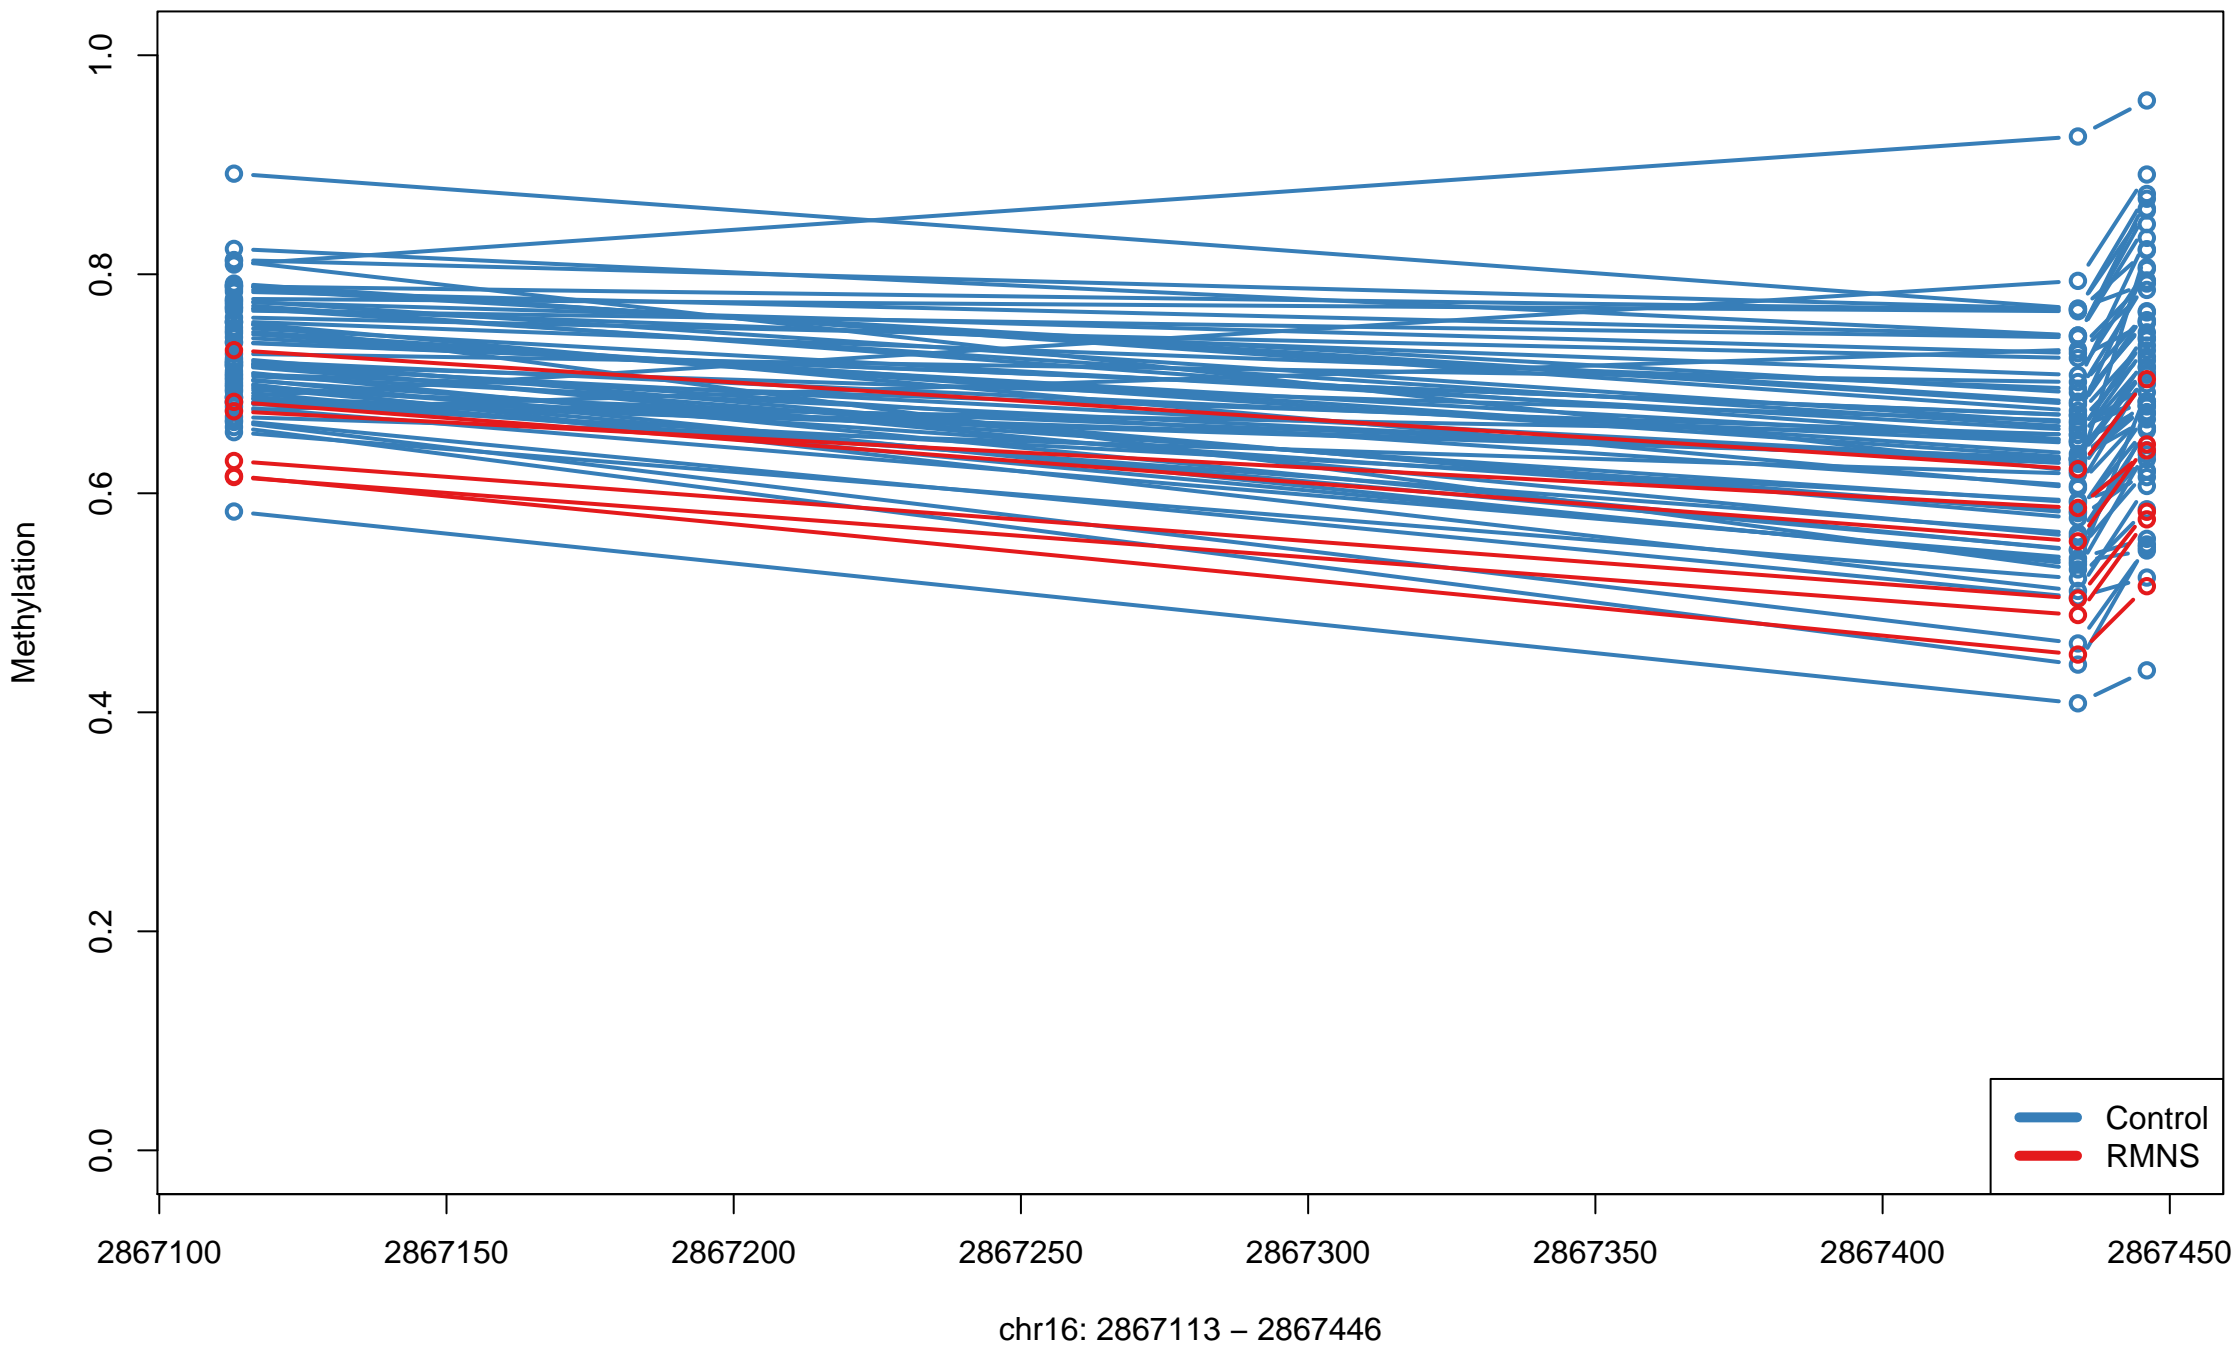

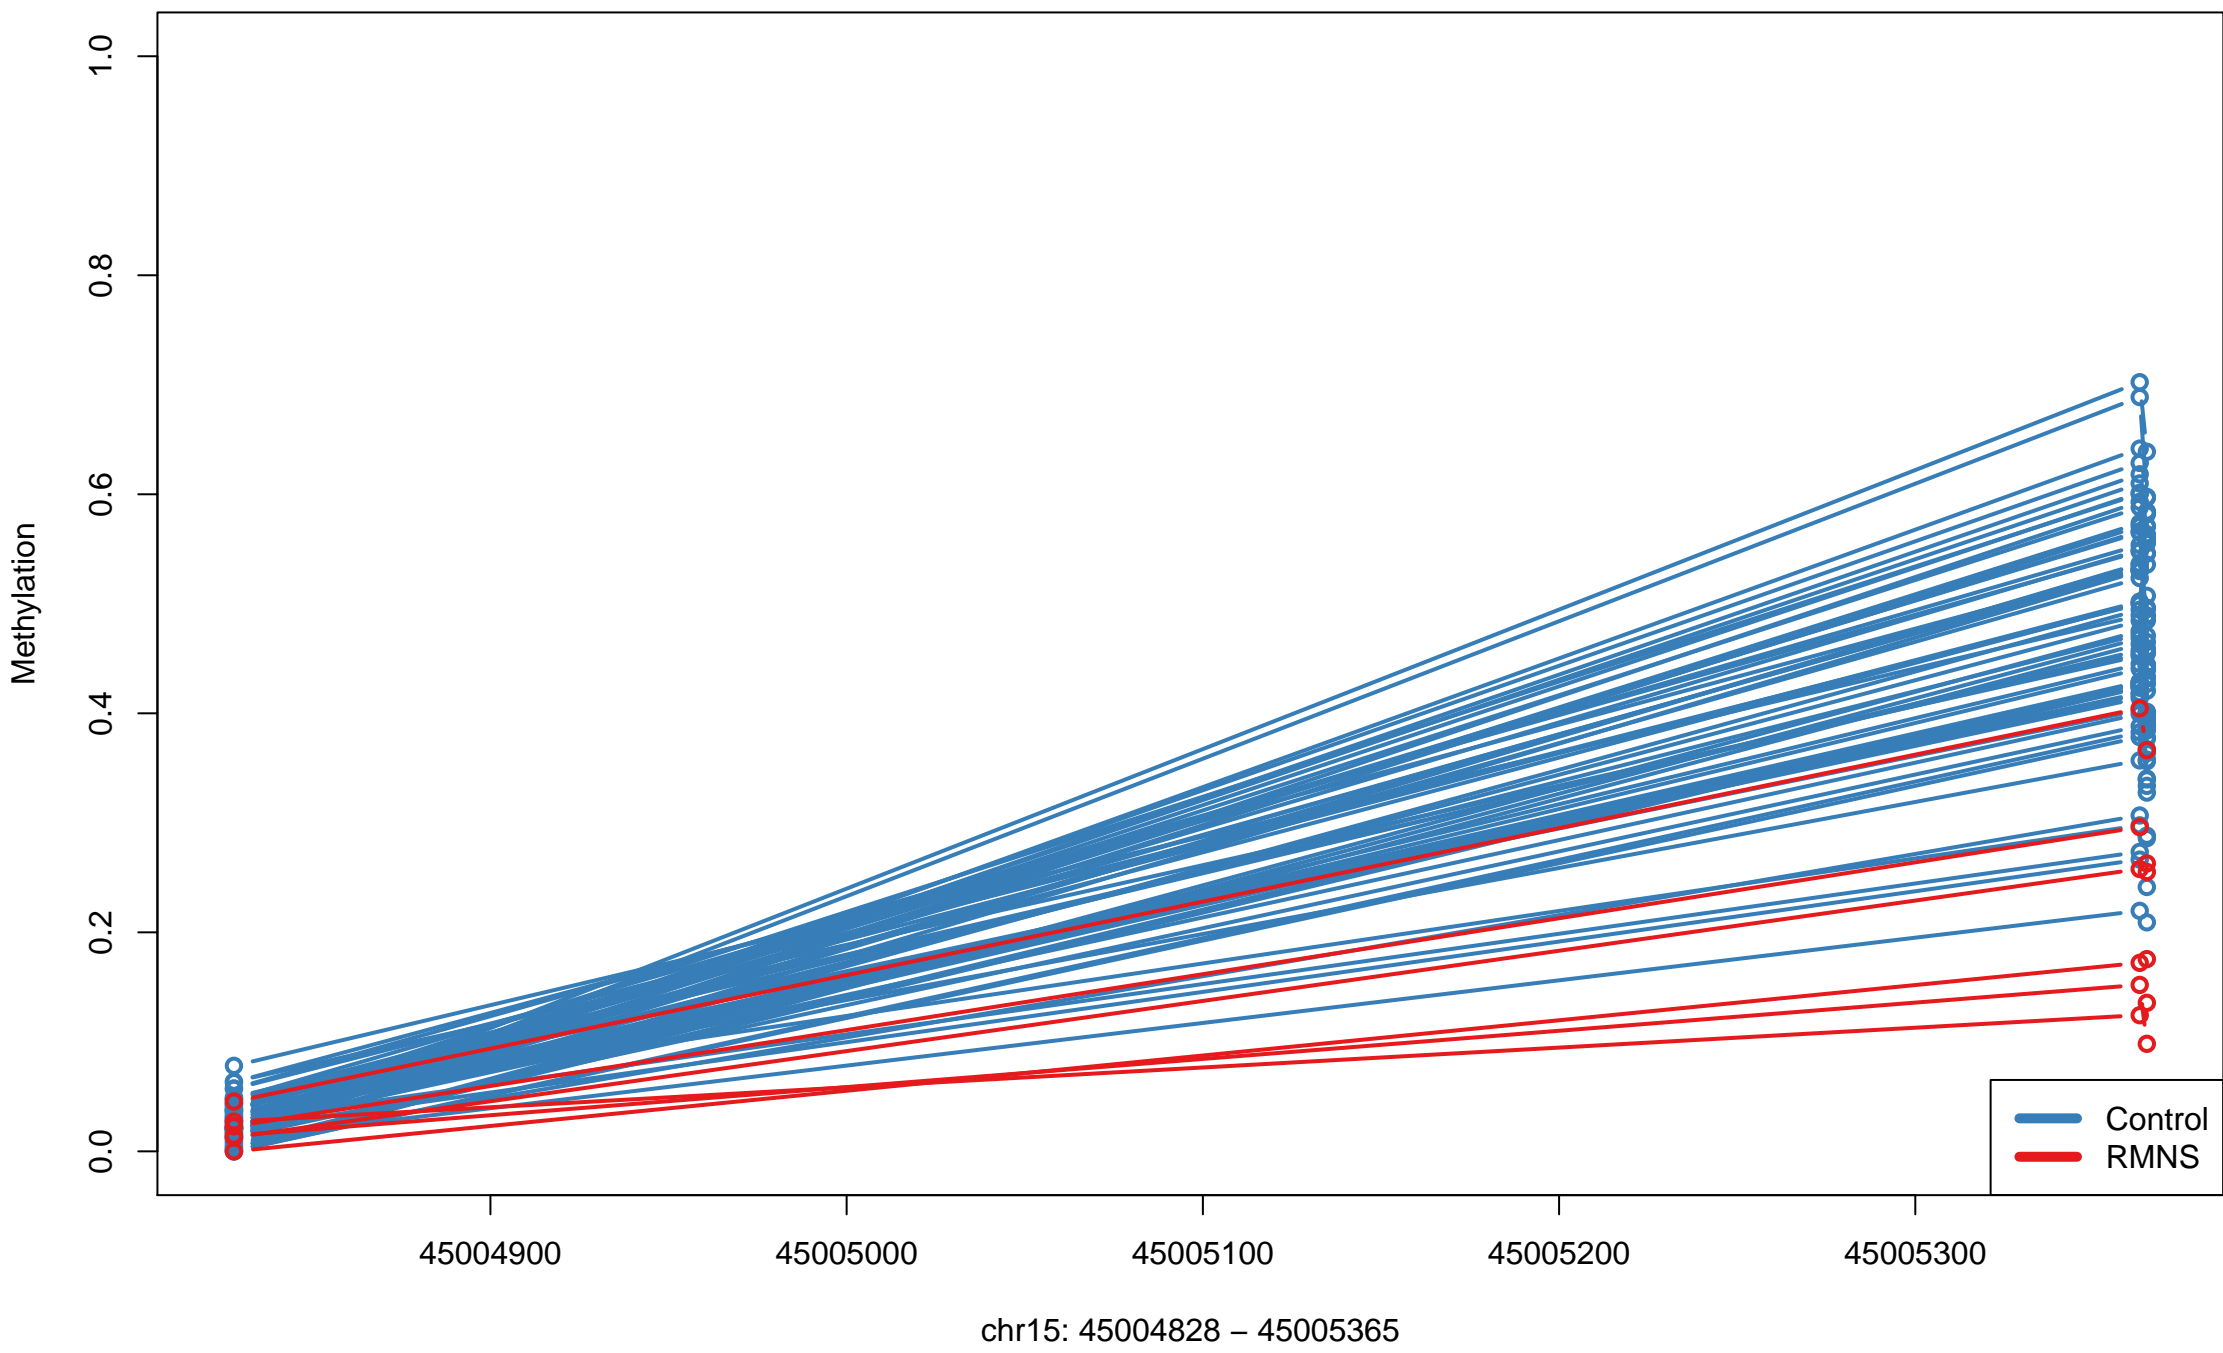

Supplement: 13148_2019_804_MOESM1_ESM.pdf [file 13148_2019_804_MOESM1_ESM.pdf]
